# Supplementary material
Source: PubMed Central journal article supplement (PMC2938164)
Supplement: pp.110.160044_1.pdf [file pp.110.160044_1.pdf]

**Carbonell et al.**  
**Figure S1**

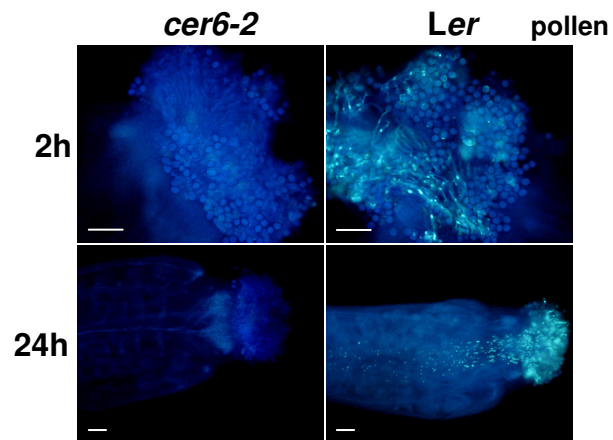

**Figure S1. Germination of pollen in *cer6-2***

Images of aniline blue-stained stigma and whole pistils of *cer6-2*, pollinated with *cer6-2* (left panels) or *Ler* pollen (right panels). Pollen tubes (callose) appear fluorescent. Scale bar is 100  $\mu$ m.

**Carbonell et al.**  
**Figure S2**

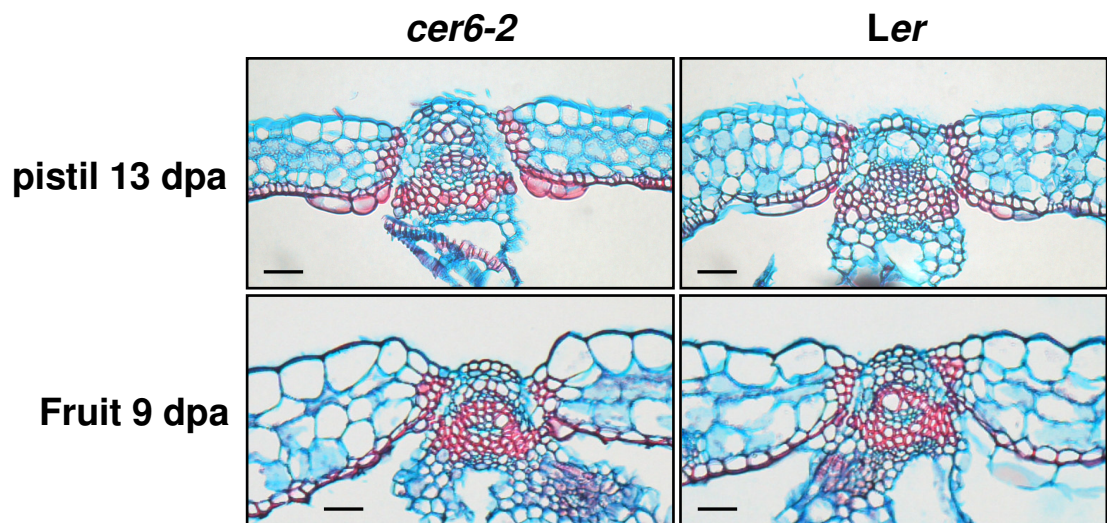

**Figure S2. Lignin deposition in unfertilized pistils and fruits**

Transversal sections of unfertilized pistils of 13 dpa and seeded fruits of 9 dpa of both the *cer6-2* mutant and the parental *Ler*. Samples were fixed and embedded in paraffin. Lignin was stained with alcian blue-safranin. Scale bar is 20  $\mu$ m.

# Carbonell et al. Figure S3

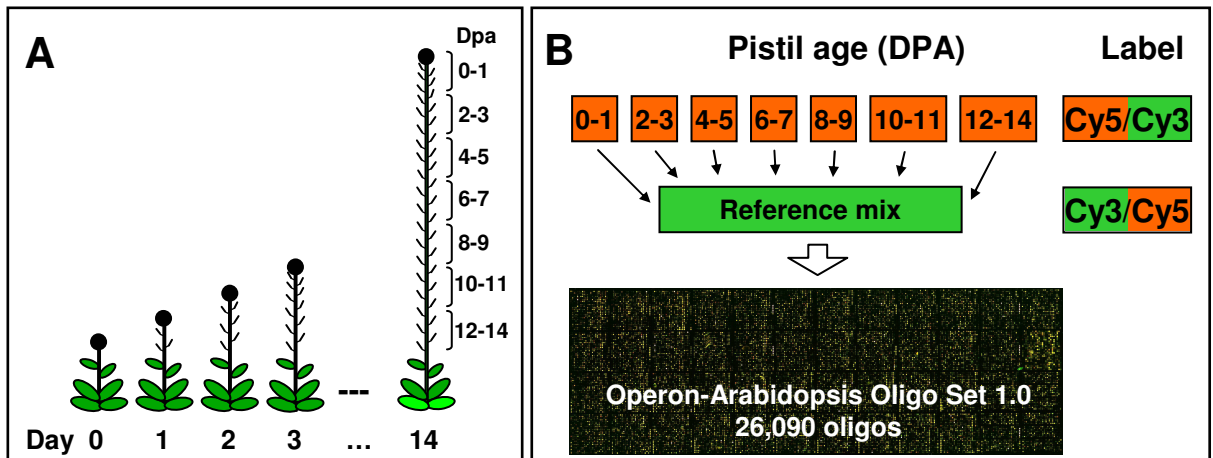

## Figure S3. Diagram of experimental design for the microarray analysis

**A**, Plants of *cer6-2* were grown at low relative humidity and the position and number of each flower at anthesis in the primary inflorescence was registered every day to date pistil age. **B**, For microarray analysis, pistils were harvested according to age, and compared using a common reference design. Two biological replicates were used and each was analyzed twice with dye-swap (four slides per time point).

# Carbonell et al. Figure S4

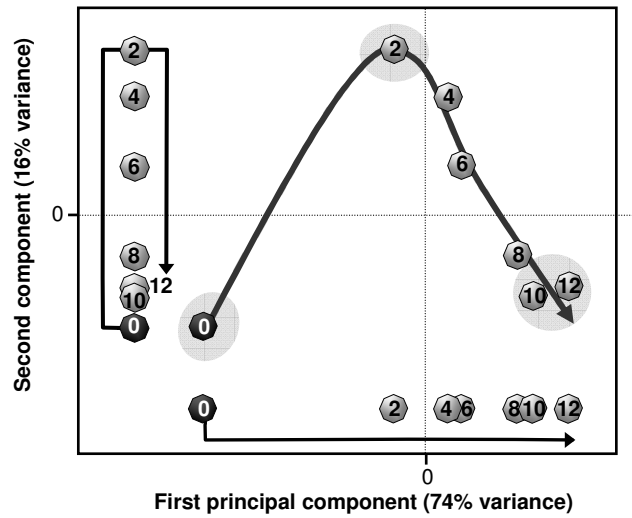

## Figure S4. Two component-PCA of gene expression during post-anthesis pistil development

Averaged expression of significant genes on each time-point was used. A “developmental path” connecting the different samples is indicated by a grey arrow. Diagrams on the left and bottom indicate the directional path followed by the components. The most divergent time point samples (0-1 DPA, 2-3 DPA, and the average from 10-11 and 12-14 DPA) are highlighted.

**Carbonell et al.  
Figure S5**

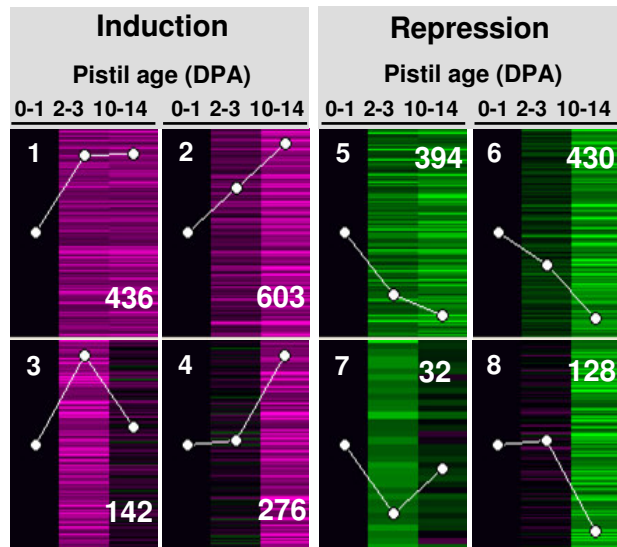

**Figure S5. Clustering in a 4x2 SOM analysis of significant genes**  
SOM clustering analysis of significantly regulated genes (Supplemental Table S3). Magenta, green, and black colors indicate increased, decreased or unchanged expression relative to 0-1 DPA, respectively. The number of non-redundant genes in each class is indicated. The graphs represent the average expression profile in each cluster.

Figure S6

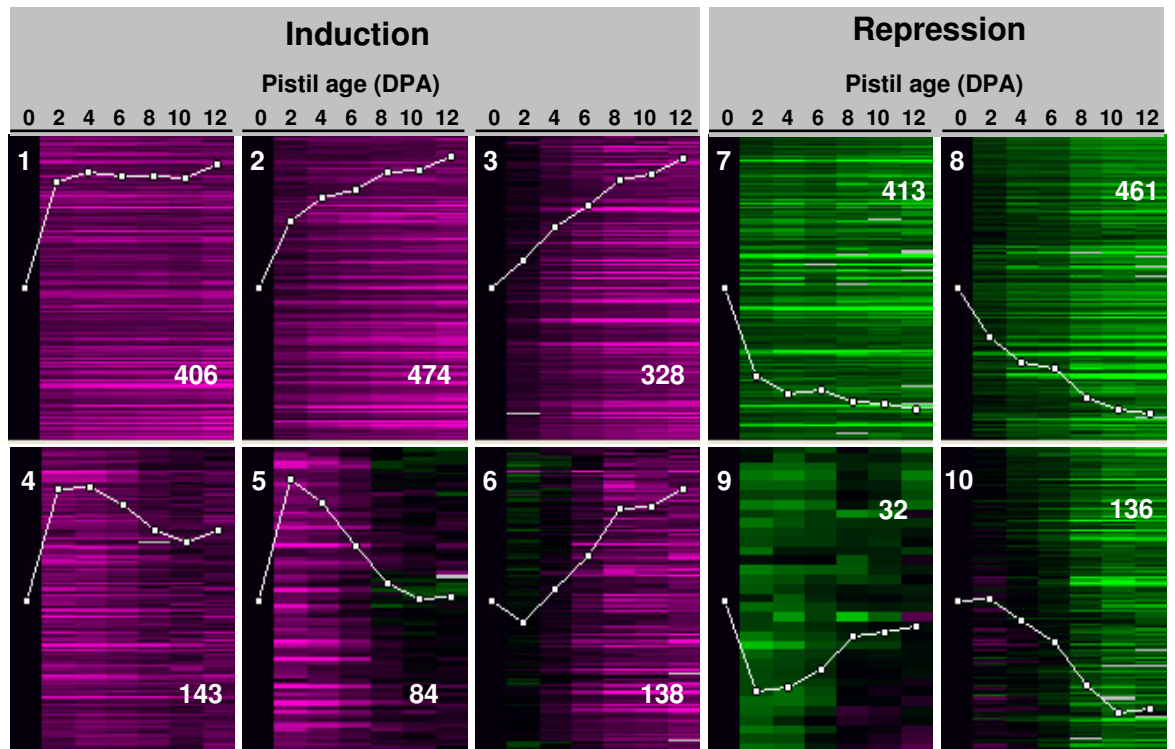

**Figure S6. Clustering in a 5x2 SOM analysis of significant genes identified in the complete dataset**

The SOM analysis over the significantly regulated genes identified in the complete dataset and included in the Supplemental Table S2, produced six temporal expression patterns of up-regulated and four of down-regulated genes. Magenta, green, and black colors indicate increased, decreased or unchanged expression relative to 0-1 DPA, respectively. The number on the right side of each SOM refers to the non-redundant genes included on the same. The graphs represent the average expression profile in each cluster.

## Figure S7

### Figure S7. Distribution of genes contributing to the second component in the PCA

**A**, Loading plot diagram showing the contribution to the variance of the significantly regulated genes identified in the PCA (Supplemental Fig. S4). Individual genes are represented as points. The genes contributing to the second PC (separating 2-6 DPA pistils samples from the rest) ( $[\text{second PC score}] > 1.3$ ; shown in Supplemental Table S2) are highlighted, those positively supporting the second PC in magenta, and those negatively in green. **B**, Microarray gene expression profiles of genes significantly contributing to the second component ( $[\text{second PC score}] > 1.3$ ).

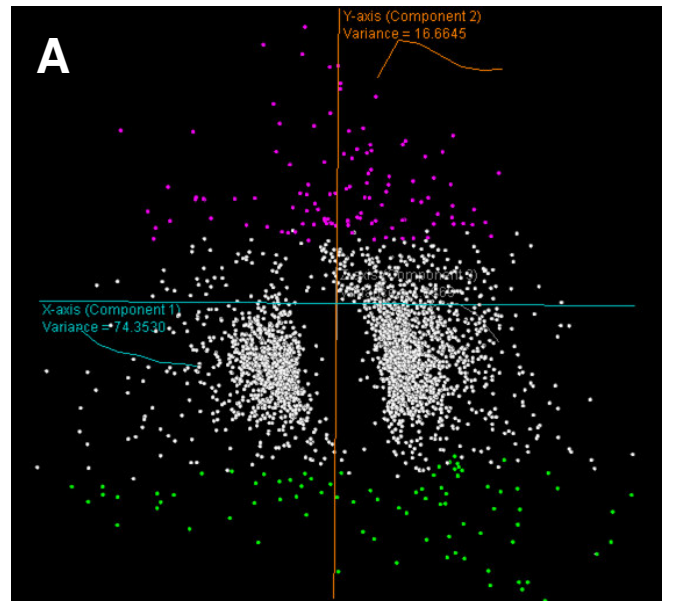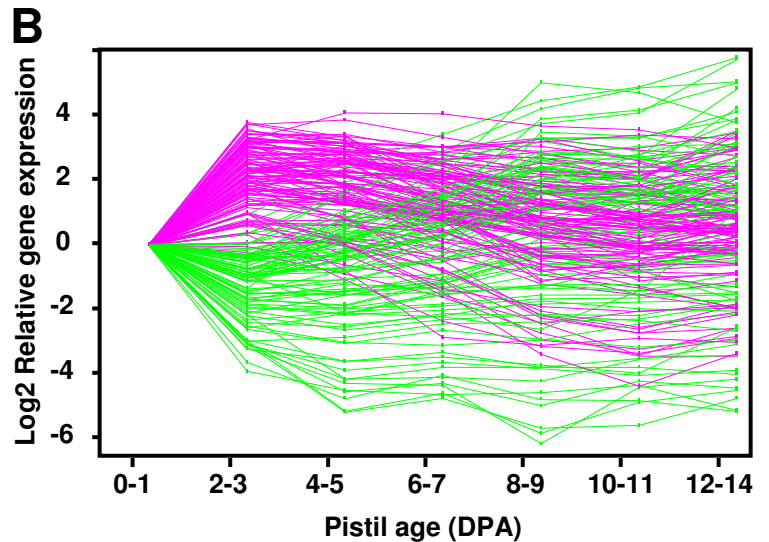

Figure S8

**Figure S8. Distribution of genes specifically contributing to the second component and not to the first component of the PCA**

**A**, Loading plot diagram showing the contribution to the variance of the significantly regulated genes identified in the PCA (Supplemental Fig. S4). Genes contributing most to the second PC and not to the first ([second PC score] > 1.3 and [first PC score] < 1.3; shown in Supplemental Table S2) are highlighted, those positively supporting the second component and not the first are in magenta, and those contributing negatively in green. **B**, Microarray gene expression profiles of genes contributing most to the second component and not the first ([second PC score] > 1.3 and [first PC score] < 1.3).

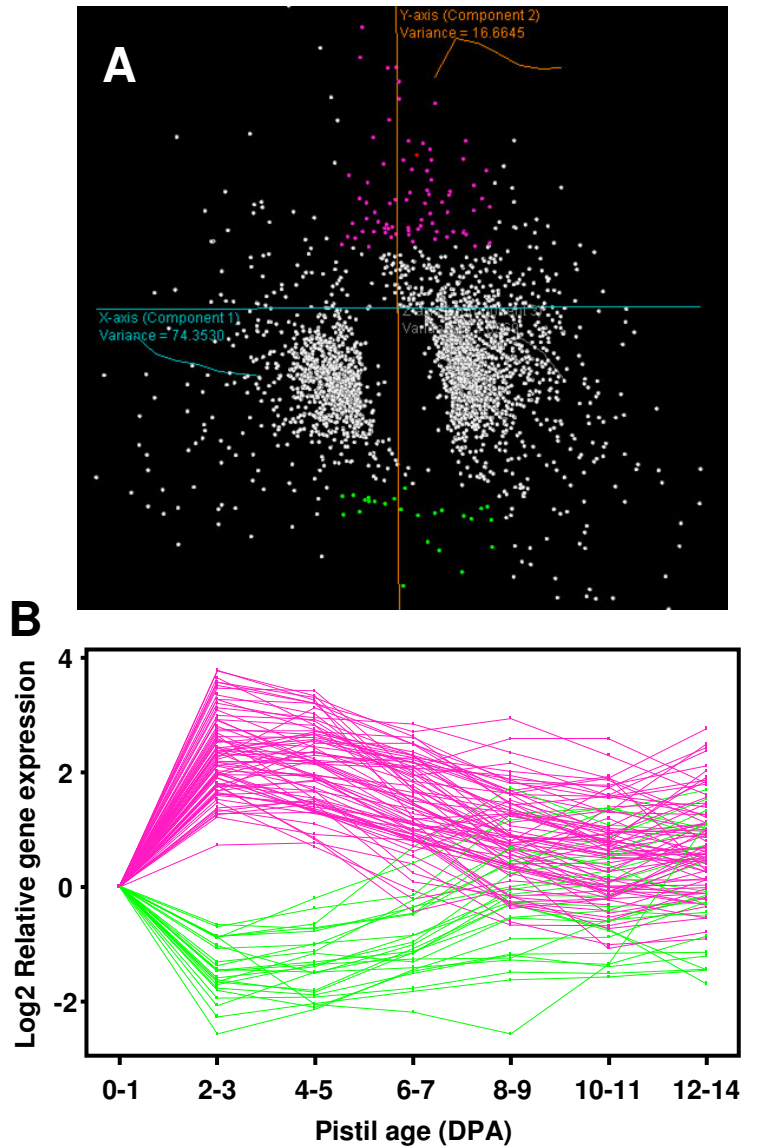



Figure S9

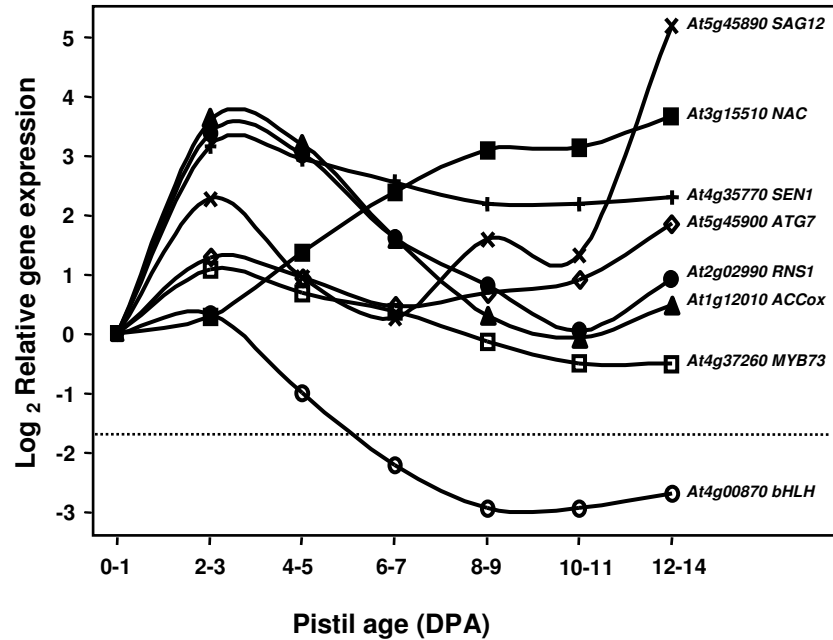

**Figure S9. Microarray expression of genes selected for qRT-PCR analysis**

Relative gene expression (log<sub>2</sub> relative to the expression at 0-1 DPA) for ACC oxidase *At1g12010* (▲); ribonuclease *RNS1 At2g02990* (●); NAC *At3g15510* (■), *MYB73 At4g37260* (□), and bHLH *At4g00870* (○) transcription factors; and senescence-related *SEN1 At4g35770* (+), *SAG12 At5g45890* (x), and *ATG7 At5g45900* (◇), from DNA microarray analysis of unfertilized pistil (Supplemental Table S1 and S2).

Carbonell et al.

Figure S10

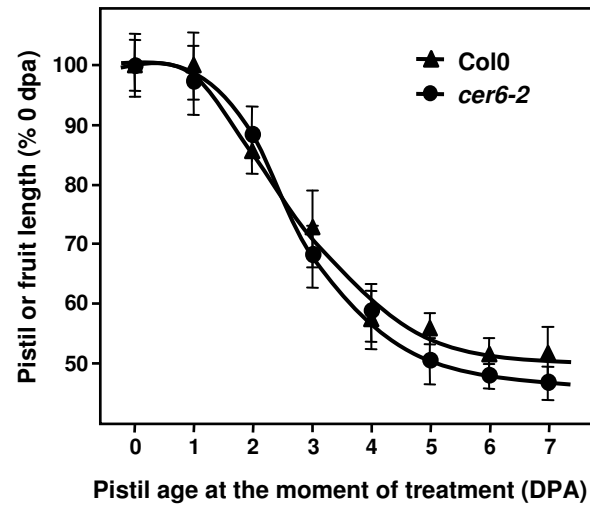

**Figure S10. Loss of Col0 pistil responsiveness to GA<sub>3</sub>**

Pistils of *cer6-2* in Col0 (●) or emasculated flowers of Col0 (▲) were treated with GA<sub>3</sub> at different ages. Pistil or fruit length was measured 10 days after GA<sub>3</sub> treatment, and data were plotted against the age of the pistil at the moment of treatment. Data are mean ± SD of at least 25 pistils per age. The experiment was repeated three times.

## **Supplemental File 1: Microarray analysis**

### **Results and Discussion: Global gene expression of unfertilized pistils**

To identify molecular events occurring during pistil post-anthesis development, gene expression was analyzed using long oligonucleotide microarrays. Experimental setup is depicted in Supplemental Figure S3. It should be pointed out that the analysis we have performed represents the average transcriptome of all pistil elements. Clearly, different pistil elements and cell types may have different gene expression patterns (Brandt et al., 2002) but major trends during unfertilized pistil development can be drawn.

#### ***General overview***

Out of the genes whose expression was detected (Supplemental Table S1), a total of 2611 genes (2672 probes) were differentially expressed in the pistil, based on 3% false discovery rate (FDR) in a multiclass Significant Analysis of Microarrays (SAM) analysis and at least two-fold change relative to anthesis (Supplemental Table S2). The general pattern of transcript changes was first explored by Principal Component Analysis (PCA), using the expression values at each time point of the 2672 differentially expressed probes. The first principal component (first PC), which explained most of the variance (74%), was associated with the time dimension and illustrates the largest variability from 0-1 to 2-3 DPA, with slighter changes from 2-3 to 12-14 DPA (Supplemental Fig. S4). An analysis of the loading plots of the first component identified mainly genes with progressive changes in gene expression, generally showing their largest shift between 0-1 and 2-3 DPA (Supplemental Table S2). The second PC, which explained 15% of the variance, was given by genes showing a maximum or minimum of their expression at 2-3 or 4-5 DPA (Supplemental Fig. S7 and Supplemental Table S2). The most divergent stages, defined by 0-1, 2-3, and 10-14 DPA, were therefore considered the most informative. Data from these three stages were used in a simplified dataset to search of differentially expressed genes, resulting in a total of 2434 significant genes (Supplemental Table S4). Those significant genes were sorted into eight clusters according to temporal expression patterns using a Self-organizing Maps (SOM) analysis (Supplemental Fig. S5 and Supplemental Table S3). Four SOMs included

genes up-regulated after anthesis (60% of all significant genes) and were classified as early up-regulated genes (18%; SOM1); progressively up-regulated (25%; SOM2); transiently up-regulated with a maximum at 2-3 DPA (5%; SOM3) and up-regulated at late stages (11%; SOM4). Similarly, repressed genes (40% of total regulated genes) were also sorted into four SOMs: genes down-regulated early after anthesis (16%; SOM5); progressively down-regulated (18%; SOM6); repressed with a minimum in expression at 2-3 DPA (1%; SOM7); and down-regulated at later stages (5%, SOM8). In addition, a SOM analysis with the complete dataset (Supplemental Table S4) was also carried out with very similar result (Supplemental Fig. S6). The SOM clustering again reflected that most prominent changes in gene expression occurred between anthesis and 2 DPA, both considering the number of differential genes and the magnitude of changes. Among the regulated genes within the complete dataset, 26% were induced at least two-fold between 0-1 and 2-3 DPA. To study this early shift in the transcriptome in more detail, we carried out an analysis comparing the expression data from 0-1 and 2-3 DPA. A total of 779 genes up-regulated from 0-1 to 2-3 DPA were identified based on a 3% FDR in a two-class SAM analysis and two-fold change (Supplemental Table S4). Interestingly, part of this early activated program was only transient as reflected by SOM3 and the second PC in the PCA (Supplemental Table S2).

### ***Functional implications of transcriptomic changes***

To gain insight into the biological meaning of the transcriptional changes detected during post-anthesis pistil development, a functional enrichment assessment was conducted. We used the biological function gene annotation defined by the Gene Ontology (GO) Consortium (Ashburner et al., 2000) in combination with an algorithm implemented by the FatiGO application, which returns adjusted  $p$ -values based on a multiple testing approach (Al-Shahrour et al., 2005).

Functional enrichment analysis was carried out first with the genes clustered in each temporal expression pattern (Supplemental Fig. S5 and Supplemental Table S3) but also with those identified as significantly up-regulated at 2 DPA (Supplemental Table S4). The resulting over-represented GO terms on SOMs 1 to 4 of up-regulated genes (Supplemental Table S5), and

on the genes up-regulated at 2 DPA (Supplemental Table S6), suggested activated processes related with a) ovary wall development (light response, Clp protease complex, secondary cell wall biosynthesis); b) senescence and degradation (ageing and senescence, autophagy, peroxisomal  $\beta$ -oxidation, amino acid catabolism, and sulfur [S] assimilation), and c) cellular homeostasis (trehalose biosynthesis and response to desiccation). On the other hand, terms over-represented among the repressed genes in SOMs 5, 6, and 8 (Supplemental Table S6) suggested that the most relevant repressed functions were related with metabolic processes such as d) chromatin assembly, e) protein biosynthesis, f) amino acid biosynthesis, and g) protein folding. The plausible significance of these processes is discussed:

*Activated processes: ovary wall development*

*Light response, Circadian rhythm and Stomatal movement* terms are enriched in the cluster of genes progressively up-regulated. These genes include *STN7* that encodes a thylakoidal protein kinase important for the adaptation of the photosystems to changes in light conditions (Bellafiore et al., 2005; Bonardi et al., 2005) and the cryptochrome encoding gene *CRY1*, which has a critical role in the response to high irradiance (Kleine et al., 2007). The activation of both, *STN7* and *CRY1*, might be given by the exposure of the pistil to light after flower opening. On the other hand, the increase in stomata aperture reported here (Fig. 2; Table 1) might be related with the up-regulation observed for the calcium channel encoding *TPC1* (Peiter et al., 2005), the phosphatase *PP2CA* (Kuhn et al., 2006), and the major plasma membrane H<sup>+</sup>-ATPase *AHA1* (Merlot et al., 2007).

*Clp protease complex.* Activation of this kind of ATP-dependent proteolysis in the pistil is reflected by the progressive up-regulation of genes encoding components of the complex. The up-regulation of these genes, including *ClpC1* and *ClpR1*, may be related with plastid development (Sjögren et al., 2004; Koussevitzky et al., 2007; Stanne et al., 2009) in the ovary wall and with the concomitant chlorophyll *b* biosynthesis (Nakagawara et al., 2007). Indeed, increase of chlorophyll levels (Fig. 3A) clearly correlates with the up-regulation of these genes.

*Secondary cell wall biosynthesis.* Secondary cell wall biosynthetic genes were up-regulated in pistils from 6 DPA, and reached their maxima at 8 DPA, timing fully coincident with the sclerenchyma differentiation in the subepidermal adaxial cell layer (Fig. 2G). These genes include all three genes encoding Cesa proteins (*IRX1*, *IRX3*, and *IRX5*), required to synthesize cellulose specifically in the secondary cell wall (Gardiner et al., 2003; Taylor et al., 2003); the laccase encoding *IRX12*, involved in lignin biosynthesis; and *IRX9*, necessary for normal glucuronoxyylan elongation and specifically expressed in cells undergoing secondary wall thickening (Brown et al., 2005; Peña et al., 2007).

#### *Activated processes: senescence and degradation*

*Ageing and senescence.* These are the most significantly up-regulated categories from anthesis to 2-3 DPA, and they include the regulators of senescence *ORE9*, *AtNAP*, *CPR5*, and *AHK3*. A marked expression of the F-box *ORE9* gene has been reported in ovules and styles in anthesis flowers (Stirnberg et al., 2007), where it may regulate short longevity (Woo et al., 2001). *AHK3* is the cytokinin receptor involved in the cytokinin-dependent control of leaf longevity (Kim et al., 2006; Riefler et al., 2006). *AHK3* is up-regulated in pistils at 2-3 DPA and its expression remains high up to 12-14 DPA. This contrasts with the anti-senescing role of cytokinin. However, it is possible that a reduction in cytokinin levels during the senescence of some pistil elements results in increased receptor expression as part of a homeostatic control mechanism of the response to the hormone. Indeed, the down-regulation of the cytokinin primary response A-type *ARR* gene *ARR6* (Supplemental Table S2) is also consistent with depletion in the levels of this hormone, since *ARR6* is induced by cytokinins in an *AHK3*-dependent manner (Kim et al., 2006). Regarding effectors of the senescence process, *SAG12*, *RNS1*, *SEN1*, and *SAG13* were also induced in pistils from 2-3 DPA.

*Autophagy.* This is another key process activated from 2-3 DPA. *ATG5* and *ATG7*, which are important for proper nutrient recycling and senescence (Doelling et al., 2002; Thompson et al., 2005), were up-regulated along with several members of the *ATG8* family.

*Peroxisomal  $\beta$ -oxidation.* The three genes encoding peroxisomal citrate synthase (*CSY*) were up-regulated from 2-3 DPA. *CSY* activity is required for peroxisomal fatty acid oxidation (Pracharoenwattana et al. 2005), whereas the up-regulation of the 3-ketoacyl-CoA thiolase-encoding *KAT2*, which has been found to be important for leaf senescence (Castillo and Leon, 2008), further supports the activation of fatty acids oxidation during pistil senescence.

*Sulfur assimilation.* This GO term is over-represented within all up-regulated genes (data not shown). Interestingly, S assimilation has also been found activated during silique senescence, but not in the senescence of leaves or petals (Wagstaff et al., 2009). A likely explanation for the specific activation in pistil and silique senescence is their high content on the S-containing glucosinolates (Brown et al., 2003).

#### *Repressed processes: Protein biosynthesis*

Consistent with the decrease in the protein content (Fig. 3B), we identified the most significant inactivated process to be related with *Translation*. Almost half of the genes in this GO term were down-regulated, particularly among genes with progressive fall in expression, but also among those early or late repressed. However, during leaf and silique valve senescence, *Photosynthesis* is by far the most significant inactivated process (Wagstaff et al., 2009), while it was not repressed during the first 14 DPA of unfertilized pistil development, indicating again that the pistil tissues that undergo senescence within the first 14 DPA are mainly non-photosynthetic. Coordinated with the breakdown of protein, *Amino acid biosynthesis* and *Protein folding* were inactivated as well, probably reflecting the fact that they are no longer needed.

Finally, we carried out a biological assessment of genes contributing to the second but not to the first PC of the PCA (Supplemental Table S7). These genes showed transient changes in expression mainly at 2-3 DPA, 75% of them being early and transiently up-regulated (Supplemental Fig. S8). These included the senescence-related nucleases *RNS1*, *RNS3* and *BFN1* and several peptidases, including *CEP1* which is expressed in senescing ovules (Gietl and Schmid, 2001). Interestingly, *Aging* was the single GO term

significantly over-represented (Supplemental Table S8), indicating that constituents of the pistil; probably including transmitting tract, stigma, and ovules, undergo early senescence independently of the growth observed in other parts of the pistil (i.e. the ovary wall).

## **Materials and Methods**

### **Microarray construction, hybridization and scanning**

Long-oligonucleotide DNA microarrays, from the Operon Arabidopsis Genome Oligo Set Version 1.0, provided by Dr. Galbraith (University of Arizona, <http://www.ag.arizona.edu/microarray/>) were used. Microarray construction, hybridization and analysis were as described in Bueso et al. (2007).

In order to analyze global gene expression, unfertilized *cer6-2* pistils between anthesis and 14 DPA, were sorted according to age in 7 time-points (0-1, 2-3, 4-5, 6-7, 8-9, 10-11, and 12-14 DPA), and aminoallyl-amplified-RNA was obtained (Supplemental Fig. S3B). The experiment was run twice, from two batches of plants grown independently to generate two biological replicates. A reference mix was generated for each biological replicate by mixing equal amount of aminoallyl-amplified-RNA from the seven samples. Each sample was compared twice against the reference mix with dye-swap, for a total of 28 microarrays used.

A series of filters were applied to ensure high quality data. Spots were selected only if intensities in both channels were higher than twice the median signal background, and if valid data was obtained in more than 70% of the hybridizations in each dataset. To determine differential expression, data after average technical replicates were analyzed with the SAM package (Tusher et al., 2001). Highly seed-specific genes were filtered out using the expression data ATGE\_76 to ATGE\_84 from AtGenExpress-SeedsSiliques (<http://www.genomforschung.uni-bielefeld.de/GF-research/AtGenExpress-SeedsSiliques.html>) (Supplemental Table S9). Significant genes were then clustered based on expression profiles by the SOM algorithm (Kohonen, 1990) using Acuity software (Axon Molecular Devices). Functional enrichment in GO terms (Ashburner et al., 2000) was obtained using FatiGO from the GEPAS (<http://babelomics.bioinfo.cipf.es/>) (Al-Shahrour et al., 2005), with adjusted *p* values after correcting for multiple testing.



Oligos were printed onto aminosilane-coated slides (Telechem). After printing, the slides were baked for 1h at 80°C and stored dry in darkness at room temperature (RT). Just before use, DNA was rehydrated by placing the slide upside-down over a water bath at 60°C for 10 s, and snap dry onto a heat block at 65°C. Rehydration was repeated 3 times. DNA was immobilized by UV light by exposing the slides DNA-side-up to 65 mJ in a UV cross-linker (Stratagene). Slides were then washed twice in 0.1% (w/v) SDS and 4 times in water, 2 min each wash at room temperature (RT), and finally dipped in 96% ethanol for 1 min and dried by centrifugation at 2000 rpm 1 min at RT. Slides were pre-hybridized for 30 min at 42°C with 100 µL of pre-hybridization solution (6x SSC, 1% [w/v] BSA and 0.5% [w/v] SDS), under a 60x22 mm coverslip LifterSlip (Erie Scientific) in a microarray hybridization chamber (ArrayIt Hybridization Cassette, Telechem). Slides were rinsed five times in H<sub>2</sub>O in a slide rack at RT and dried by centrifugation at 2000 rpm 1 min at RT. Slides were hybridized immediately after.

Total RNA was extracted using the RNeasy Plant Mini Kit (Qiagen). Total RNA was then amplified using the MessageAmp II aRNA Amplification kit (Ambion), basically as described by the manufacturer. Modified nucleotide 5-(3-aminoallyl)-UTP (aa-UTP) (Ambion) was incorporated into the amplified RNA (aRNA) at ratio 1:1 with UTP. After purification, 7.5 µg of aminoallyl-aRNA (aa-aRNA) were used in a coupling reaction with either fluorescent cyanine 3-CTP (Cy3) or cyanine 5-CTP (Cy5) as reactive N-hydroxyl succinimidyl dyes (NHS-dyes) (Amersham Pharmacia Biotech). For that, each aliquot of Cy3 or Cy5 were dissolved in 20 µL of DMSO and used in four coupling reactions. Aa-aRNA was dissolved in 15 µL of fresh-made 0.1 M NaCO<sub>3</sub> pH 9.0, and mixed with 5 µl of either Cy3 or Cy5 dye. Coupling was allowed for 1 h at RT in the dark. Reaction was stopped by adding 35 µL of 100 mM sodium acetate pH 5.2 and incubated 5 min in the dark. Fluorescent aa-aRNA was purified using a MegaClear purification column (Ambion) as described by the manufacturer. Dye incorporation was determined using a NanoDrop spectrophotometer and coupled Cy-aa-aRNA (250-300 pmol Cy dye in 5-7 µg aa-aRNA) was dried in a speedvac and dissolved in 2.5 µL of filtered water. The corresponding two Cy-aa-aRNA preparations (Cy3 and Cy5) were mixed and fragmented in the presence of 20 µg of tRNA (Ambion) and 20 µg of poly(A) (Roche) using the

RNA fragmentation Reagent (Ambion) as described by the manufacturer, in a final volume of 10  $\mu$ L. Fragmented Cy-aa-aRNA was used immediately in the hybridization mix, which contained 50  $\mu$ L deionized formamide, 30  $\mu$ L 20x SSC, 5  $\mu$ L 100x Denhardt's solution (Sigma), and 5  $\mu$ L 10% (w/v) SDS in a final volume of 100  $\mu$ L. Hybridization mixture was denatured at 95°C for 5 min, spun briefly, and applied by capillary between a pre-treated slide (see above) and a 60x42 mm coverslip LifterSlip. Slides were incubated o/n at 37°C in a microarray hybridization chamber. Slides were washed sequentially once in 1x SSC 0.1% (w/v) SDS 5 min at 30°C; once in 0.2x SSC 0.1% (w/v) SDS 5 min at 30°C; twice in 0.1x SSC 2 min each at 28°C; and finally 0.01x SSC 10 s at RT. Slides were dried by centrifugation at 2000 rpm 1 min at RT.

Hybridized microarray slides were scanned on GenePix 4000B scanner (Axon Molecular Devices) at 532-nm for the Cy3 and 635-nm for the Cy5 dye, at 10-nm resolution and 100% laser power. Photomultiplier tube voltages were adjusted manually in order to balance the overall signal intensity for each channel, to minimize the number of spots with saturated pixels, and to increase signal-to-noise ratio. Spot intensities were quantified using GenePix Pro 6.0 microarray-analysis software (Axon Molecular Devices). The expression values of all individual hybridizations were normalized by mean global intensity and with lowess (locally weighted scatter plot) correction (Yang et al., 2002) with GenePix Pro 6.0 and Acuity 4.0 software (Axon Molecular Devices), respectively.

Microarray dataset (accession number GSE13113) is available on the Gene Expression Omnibus (GEO).

## References

- Al-Shahrour F, Díaz-Uriarte R, Dopazo J** (2005) Discovering molecular functions significantly related to phenotypes by combining gene expression data and biological information. *Bioinformatics* **21**: 2988-2993
- Ashburner M, Ball CA, Blake JA, Botstein D, Butler H, Cherry JM, Davis AP, Dolinski K, Dwight SS, Eppig JT, Harris MA, Hill DP, Issel-Tarver L, Kasarskis A, Lewis S, Matese JC, Richardson JE, Ringwald M, Rubin GM, Sherlock G** (2000) Gene Ontology: tool for the unification of biology. The Gene Ontology Consortium. *Nat Genet* **25**: 25-29

- Bellafiore S, Barneche F, Peltier G, Rochaix JD** (2005) State transitions and light adaptation require chloroplast thylakoid protein kinase STN7. *Nature* **433**: 892-895
- Bonardi V, Pesaresi P, Becker T, Schleiff E, Wagner R, Pfannschmidt T, Jahns P, Leister D** (2005) Photosystem II core phosphorylation and photosynthetic acclimation require two different protein kinases. *Nature* **437**: 1179-1182
- Brandt S, Kloska S, Altmann T, Kehr J** (2002) Using array hybridization to monitor gene expression at the single cell level. *J Exp Bot* **53**: 2315-2323
- Brown PD, Tokuhsa JG, Reichelt M, Gershenzon J** (2003) Variation of glucosinolate accumulation among different organs and developmental stages of *Arabidopsis thaliana*. *Phytochemistry* **62**: 471-481
- Brown DM, Zeef LA, Ellis J, Goodacre R, Turner SR** (2005) Identification of novel genes in *Arabidopsis* involved in secondary cell wall formation using expression profiling and reverse genetics. *Plant Cell* **17**: 2281-2295
- Castillo MC, Leon J** (2008) Expression of the beta-oxidation gene 3-ketoacyl-CoA thiolase 2 (KAT2) is required for the timely onset of natural and dark-induced leaf senescence in *Arabidopsis*. *J Exp Bot* **59**: 2171-2179
- Doelling JH, Walker JM, Friedman EM, Thompson AR, Vierstra RD** (2002) The APG8/12-activating enzyme APG7 is required for proper nutrient recycling and senescence in *Arabidopsis thaliana*. *J Biol Chem* **277**: 33105-33114
- Gardiner JC, Taylor NG, Turner SR** (2003) Control of cellulose synthase complex localization in developing xylem. *Plant Cell* **15**: 1740-1748
- Gietl C, Schmid M** (2001) Ricinosomes: an organelle for developmentally regulated programmed cell death in senescing plant tissues. *Naturwissenschaften* **88**: 49-58
- Kim HJ, Ryu H, Hong SH, Woo HR, Lim PO, Lee IC, Sheen J, Nam HG, Hwang I** (2006) Cytokinin-mediated control of leaf longevity by AHK3 through phosphorylation of ARR2 in *Arabidopsis*. *Proc Natl Acad Sci USA* **103**: 814-819
- Kleine T, Kindgren P, Benedict C, Hendrickson L, Strand A** (2007) Genome-wide gene expression analysis reveals a critical role for

CRYPTOCHROME1 in the response of Arabidopsis to high irradiance. *Plant Physiol* **144**: 1391-1406

**Kohonen T** (1990) The self-organizing map. *Proc IEEE* **78**: 1464-1480

**Koussevitzky S, Stanne TM, Peto CA, Giap T, Sjögren LL, Zhao Y, Clarke AK, Chory J** (2007) An *Arabidopsis thaliana* virescent mutant reveals a role for ClpR1 in plastid development. *Plant Mol Biol* **63**: 85-96

**Kuhn JM, Boisson-Dernier A, Dizon MB, Maktabi MH, Schroeder JI** (2006) The protein phosphatase AtPP2CA negatively regulates abscisic acid signal transduction in Arabidopsis, and effects of abh1 on AtPP2CA mRNA. [Plant Physiol](#) **140**: 127-139

**Merlot S, Leonhardt N, Fenzi F, Valon C, Costa M, Piette L, Vavasseur A, Genty B, Boivin K, Müller A, Giraudat J, Leung J** (2007) Constitutive activation of a plasma membrane H(+)-ATPase prevents abscisic acid-mediated stomatal closure. [EMBO J](#) **26**: 3216-3226

**Nakagawara E, Sakuraba Y, Yamasato A, Tanaka R, Tanaka A** (2007) Clp protease controls chlorophyll b synthesis by regulating the level of chlorophyllide a oxygenase. *Plant J* **49**: 800-809

**Peiter E, Maathuis FJ, Mills LN, Knight H, Pelloux J, Hetherington AM, Sanders D** (2005) The vacuolar Ca<sup>2+</sup>-activated channel TPC1 regulates germination and stomatal movement. *Nature* **434**: 404-408

**Peña MJ, Zhong R, Zhou GK, Richardson EA, O'Neill MA, Darvill AG, York WS, Ye, ZH** (2007) Arabidopsis irregular xylem8 and irregular xylem9: implications for the complexity of glucuronoxylan biosynthesis. *Plant Cell* **19**: 549-563

**Pracharoenwattana I, Cornah JE, Smith SM** (2005) Arabidopsis peroxisomal citrate synthase is required for fatty acid respiration and seed germination. *Plant Cell* **17**: 2037-2048

**Riefler M, Novak O, Strnad M, Schmölling T** (2006) Arabidopsis cytokinin receptor mutants reveal functions in shoot growth, leaf senescence, seed size, germination, root development, and cytokinin metabolism. *Plant Cell* **18**: 40-54

**Sjögren LL, MacDonald TM, Sutinen S, and Clarke AK** (2004) Inactivation of the clpC1 gene encoding a chloroplast Hsp100 molecular chaperone

- causes growth retardation, leaf chlorosis, lower photosynthetic activity, and a specific reduction in photosystem content. *Plant Physiol.* **136**: 4114-4126
- Stanne TM, Sjögren LL, Koussevitzky S, Clarke AK** (2009) Identification of new protein substrates for the chloroplast ATP-dependent Clp protease supports its constitutive role in Arabidopsis. *Biochem J* **417**: 257-268
- Stirnberg P, Furner IJ, Leyser O**, (2007) MAX2 participates in an SCF complex which acts locally at the node to suppress shoot branching. *Plant J* **50**: 80-94
- Taylor NG, Howells RM, Huttly AK, Vickers K, Turner, SR** (2003) Interactions among three distinct CesA proteins essential for cellulose synthesis. *Proc Natl Acad Sci USA* **100**: 1450-1455
- Thompson AR, Doelling JH, Suttangkakul A, Vierstra RD** (2005) Autophagic nutrient recycling in Arabidopsis directed by the ATG8 and ATG12 conjugation pathways. *Plant Physiol* **138**: 2097-2110
- Tusher VG, Tibshirani R, Chu G** (2001) Significance analysis of microarrays applied to the ionizing radiation response. *Proc Natl Acad Sci USA* **98**: 5116-5121
- Wagstaff C, Yang TJ, Stead AD, Buchanan-Wollaston V, Roberts JA** (2009) A molecular and structural characterisation of senescing Arabidopsis siliques and comparison of transcriptional profiles with senescing petals and leaves. *Plant J* **57**: 690-705
- Woo HR, Chung KM, Park J-H, Oh SA, Ahn T, Hong SH, Jang SK, Nam HG** (2001) ORE9, an F-box protein that regulates leaf senescence in Arabidopsis. *Plant Cell* **13**: 1779-1790
- Yang YH, Dudoit S, Luu P, Lin DM, Peng V, Ngai J, Speed TP** (2002) Normalization for cDNA microarray data: a robust composite method addressing single and multiple slide systematic variation. *Nucl Acids Res* **30**: e15

## Supplemental File 2

### Staining of Pollen Germination

Pollen germination was stained with aniline blue, basically as described by the Preuss lab (<http://preuss.bsd.uchicago.edu/>). Pistils of the *cer6-2* mutant were pollinated with either *cer6-2* or *Ler* wild type pollen. Pistils were harvested at 2 and 24 h after pollination and fixed in 10% acetic acid in EtOH for 90 min. Samples were then softened by incubation o/n in 1M NaOH, and washed three times with 50 mM KPO<sub>4</sub> buffer pH 7.5. Pollen tubes (callose) was stained with 0.01% aniline blue (in KPO<sub>4</sub> buffer) for 5 to 10 min. Samples were mounted with KPO<sub>4</sub> buffer in 50% glycerol onto glass slides and visualized using a microscope Eclipse E600 (Nikon).

### Staining of lignin

Unfertilized pistils and seeded fruits were fixed o/n at 4°C in FAE (50% [v/v] ethanol, 5% [v/v] formaldehyde, 10% [v/v] acetic acid). Samples were then dehydrated in a series of EtOH:H<sub>2</sub>O solutions (15%, 30%, 50%, 70%, 96%, and 100%) during 30 min each at 4°C, and o/n at 4°C in 100% EtOH. Next, samples were incubated in a series of solutions of HistoClear and EtOH at 1:2, 1:1, 2:1 (v/v), one hour each at room temperature, and then o/n in 100% HistoClear. The next day, samples were incubated in HistoClear:Paraffin at ratios 1:2, 1:1, and 2:1 (v/v), 4-5 h each at 58°C, and then o/n in 100% paraffin. Paraffin was changed three times during the next day and the paraffin blocks with the samples were made.

Sections (8-10 μm) were generated and deposited onto glass slides covered with 3-aminopropyltriethoxysilane (TESPA). Slides were then washed

for 10 min in 100% HistoClear and sections were rehydrated through a series of EtOH:H<sub>2</sub>O (100%, 70%, 50% 30%, and finally water), 10 min each. Sections were stained by dipping slides in 0.025% alcian blue, 0.005% safranin in 100 mM sodium acetate buffer pH 5.0 during 30 min. Slides were finally rinsed in water, mounted with Permount solution, and observed in an Eclipse 600 microscope.

**Table S10.** *Primer used for qRT-PCR and genes analyzed*

| Primer name    | Oligo sequence (5' → 3') | Target gene      |                    |
|----------------|--------------------------|------------------|--------------------|
|                |                          | AGI              | Function           |
| At1g12010qPCR5 | ATGGCTTTGATCGACGATGC     | <i>At1g12010</i> | <i>ACC oxidase</i> |
| At1g12010qPCR3 | CACCAGCTCGAAGAAGCCC      |                  |                    |
| At2g02990qPCR5 | GAAGAGCTGGCCAACACTGG     | <i>At2g02990</i> | <i>RNS1</i>        |
| At2g02990qPCR3 | CCCAAAACGCTTCACCTGA      |                  |                    |
| At3g15500qPCR5 | CTCGGACGTCTCGGCTAATC     | <i>At3g15500</i> | NAC TF             |
| At3g15500qPCR3 | AAATCCGTTAACCGGGTCAAC    |                  |                    |
| At4g00870qPCR5 | TACGCTCTACGTGCCATCGT     | <i>At4g00870</i> | bHLH TF            |
| At4g00870qPCR3 | TGACGCTTTGTCCATTCGTG     |                  |                    |
| At4g35770qPCR5 | GGCGATCACAGACATTGCTG     | <i>At4g35770</i> | <i>SEN1</i>        |
| At4g35770qPCR3 | AGCTCATTCTCTGTCCAAGCG    |                  |                    |
| At4g37260qPCR5 | GAAACATGGTCCGAGGAACTG    | <i>At4g37260</i> | <i>MYB73</i>       |
| At4g37260qPCR3 | CGTCCAGGGATTGATTTGCT     |                  |                    |
| At5g45890qPCR5 | AGGCACATCGAGTGGATGACT    | <i>At5g45890</i> | <i>SAG12</i>       |
| At5g45890qPCR3 | CCTTCACATCCGCGTAGACAC    |                  |                    |
| At5g45900qPCR5 | TGTTACACGCCCGGGTCTAG     | <i>At5g45900</i> | <i>AtAPG7</i>      |
| At5g45900qPCR3 | GAGTTCAACGGCGAGAGCTC     |                  |                    |
| Actin8 Fw      | AGTGGTTCGTACAACCGGTATTGT | <i>At1g49240</i> | <i>Actin8</i>      |
| Actin8 Rv      | GAGGATAGCATGTGGAATGAG    |                  |                    |



**Table S1.** Expression data from microarray analysis in the complete dataset

Normalized Log2 Ratio (Sample/Reference mix) of features passing quality control parameters (intensity in both channels higher than twice the microarray median signal background).

Dye swap has been corrected. NA, feature signal did not pass the quality control parameters.

| Oligo ID   | AGI       | Annotation                                                | 0-1 DPA A | 0-1 DPA A<br>dye swap | 0-1 DPA B | 0-1 DPA B<br>dye swap |
|------------|-----------|-----------------------------------------------------------|-----------|-----------------------|-----------|-----------------------|
| A000001_01 | At1g58360 | amino acid permease I; protein id: At1g58360.1            | -0.615    | -1.019                | -0.489    | -0.573                |
| A000002_01 | At1g26110 | expressed protein; protein id: At1g26110.1                | -0.301    | NA                    | NA        | -0.478                |
| A000003_01 | At4g04780 | hypothetical protein; protein id: At4g04780.1             | 0.248     | 0.496                 | 0.268     | 0.532                 |
| A000004_01 | At1g04140 | unknown protein; protein id: At1g04140.1                  | -0.544    | -0.245                | -0.238    | -0.493                |
| A000006_01 | At1g09640 | elongation factor 1B-gamma, putative (eEF-1B gam          | -0.335    | NA                    | -0.195    | 0.253                 |
| A000012_01 | At1g54610 | protein, putative; protein id: At1g54610.1                | -0.006    | 0.166                 | NA        | 0.363                 |
| A000013_01 | At1g33980 | hypothetical protein; protein id: At1g33980.1             | -0.532    | NA                    | NA        | -0.275                |
| A000016_01 | At1g09700 | expressed protein; protein id: At1g09700.1                | 0.645     | 0.905                 | 0.182     | 0.484                 |
| A000017_01 | At1g80040 | expressed protein; protein id: At1g80040.1                | -0.006    | -0.03                 | -0.14     | -0.241                |
| A000020_01 | At1g60220 | hypothetical protein; protein id: At1g60220.1             | 0.173     | 0.14                  | 0.166     | 0.459                 |
| A000021_01 | At1g55530 | expressed protein; protein id: At1g55530.1                | -0.395    | -0.276                | -0.351    | -0.31                 |
| A000022_01 | At1g12140 | hypothetical protein; protein id: At1g12140.1             | -0.735    | -0.625                | -0.804    | -0.528                |
| A000025_01 | At1g11650 | RNA binding protein 45 (RBP45), putative; protein id      | -0.004    | -0.264                | -0.173    | -0.131                |
| A000026_01 | At1g12120 | unknown protein; protein id: At1g12120.1                  | 0.327     | NA                    | 0.123     | 0.475                 |
| A000027_01 | At1g75860 | unknown protein; protein id: At1g75860.1                  | -0.053    | NA                    | NA        | 0.48                  |
| A000029_01 | At1g78580 | trehalose-6-phosphate synthase, putative; protein id      | 0.825     | 0.688                 | 0.318     | 1.43                  |
| A000031_01 | At1g19670 | expressed protein; protein id: At1g19670.1                | 0.904     | 0.892                 | 0.374     | 0.335                 |
| A000038_01 | At1g54060 | expressed protein; protein id: At1g54060.1                | -0.327    | 0.149                 | -0.304    | -0.05                 |
| A000040_01 | At1g48160 | signal recognition particle 19 kDa protein subunit, p     | 0.438     | 0.804                 | 0.28      | 0.196                 |
| A000041_01 | At1g01550 | expressed protein; protein id: At1g01550.1                | -0.65     | -0.86                 | -0.329    | -0.267                |
| A000042_01 | At1g13570 | F-box protein; protein id: At1g13570.1                    | -0.041    | NA                    | NA        | 0.117                 |
| A000046_01 | At1g48030 | lipamide dehydrogenase precursor; protein id: At1g        | -0.067    | 0.258                 | -0.507    | -0.055                |
| A000047_01 | At1g48020 | hypothetical protein; protein id: At1g48020.1             | -0.449    | -0.374                | NA        | NA                    |
| A000051_01 | At1g67140 | hypothetical protein; protein id: At1g67140.1             | -0.043    | 0.262                 | NA        | 1.018                 |
| A000052_01 | At1g04810 | 26S proteasome regulatory subunit (RPN2), putative        | -0.156    | -0.05                 | NA        | -0.41                 |
| A000055_01 | At1g56150 | unknown protein; protein id: At1g56150.1                  | NA        | NA                    | -0.517    | -1.083                |
| A000056_01 | At1g48140 | expressed protein; protein id: At1g48140.1                | -0.232    | 0.184                 | 0.128     | -0.179                |
| A000058_01 | At1g44000 | expressed protein; protein id: At1g44000.1                | 0.013     | NA                    | 0.048     | -0.071                |
| A000061_01 | At1g76590 | expressed protein; protein id: At1g76590.1                | -3.664    | -3.543                | -2.181    | -3.189                |
| A000063_01 | At1g76560 | expressed protein; protein id: At1g76560.1                | -1.115    | NA                    | -0.696    | NA                    |
| A000064_01 | At1g68060 | unknown protein; protein id: At1g68060.1                  | 0.942     | 1.078                 | NA        | 0.719                 |
| A000065_01 | At1g68110 | expressed protein; protein id: At1g68110.1                | -0.319    | -0.373                | NA        | -1.098                |
| A000067_01 | At1g67940 | ABC transporter family protein; protein id: At1g6794      | -1.225    | NA                    | NA        | NA                    |
| A000069_01 | At1g70070 | hypothetical protein; protein id: At1g70070.1             | 0.13      | 0.36                  | NA        | 0.786                 |
| A000073_01 | At1g68020 | putative trehalose-6-phosphate synthase; protein id       | -0.394    | -0.305                | -0.475    | 0.162                 |
| A000074_01 | At1g69980 | expressed protein; protein id: At1g69980.1                | NA        | 0.069                 | -0.214    | -0.272                |
| A000077_01 | At1g27390 | putative protein import receptor; protein id: At1g273     | 0.395     | 0.722                 | 0.643     | 1.016                 |
| A000080_01 | At1g53050 | cell division-related protein, putative; protein id: At1g | 0.432     | 0.379                 | 0.345     | 0.927                 |
| A000084_01 | At1g72690 | unknown protein; protein id: At1g72690.1                  | -0.063    | 0.489                 | NA        | 0.308                 |
| A000088_01 | At1g09060 | hypothetical protein; protein id: At1g09060.1             | -0.002    | 0.048                 | 0.056     | 0.407                 |
| A000091_01 | At1g73200 | hypothetical protein; protein id: At1g73200.1             | -0.269    | -0.329                | -0.317    | -0.544                |
| A000095_01 | At1g08910 | hypothetical protein; protein id: At1g08910.1             | -0.657    | NA                    | NA        | NA                    |
| A000098_01 | xxxx      | b/t hypothetical protein; protein id: At1g12450 and k     | NA        | NA                    | -2.523    | -2.804                |
| A000107_01 | At1g05170 | putative AVR9 elicitor response protein; protein id: /    | -0.522    | -0.449                | 0.108     | 0.433                 |
| A000111_01 | At1g49300 | small GTP-binding protein, putative; protein id: At1g     | -0.129    | -0.071                | -0.157    | -0.158                |
| A000113_01 | At1g43900 | protein phosphatase 2C (PP2C), putative; protein id       | 0.422     | 0.37                  | 0.411     | 0.923                 |
| A000115_01 | xxxx      | No hits found                                             | 0.129     | 0.105                 | -0.198    | -0.989                |
| A000120_01 | At1g69600 | hypothetical protein; protein id: At1g69600.1             | -1.142    | NA                    | NA        | NA                    |
| A000123_01 | At1g78490 | cytochrome P450, putative; protein id: At1g78490.1        | 1.196     | 1.223                 | 0.633     | 0.988                 |
| A000124_01 | At1g23040 | expressed protein; protein id: At1g23040.1                | -3.045    | -2.688                | -1.757    | -1.895                |
| A000134_01 | At1g43910 | unknown protein; protein id: At1g43910.1                  | -0.164    | -0.277                | 0.084     | 0.22                  |
| A000138_01 | At1g48440 | expressed protein; protein id: At1g48440.1                | -0.003    | 0.252                 | 0.089     | -0.176                |
| A000146_01 | At1g19850 | auxin response transcription factor; protein id: At1g     | 0.262     | 0.292                 | 0.423     | NA                    |
| A000150_01 | At1g11750 | ATP-dependent Clp protease proteolytic subunit (Cl        | 0.418     | 0.37                  | 0.18      | 0.456                 |
| A000157_01 | At1g77060 | carboxyphosphoenolpyruvate mutase, putative; p            | 0.498     | 1.075                 | 0.297     | 0.895                 |
| A000169_01 | At1g24340 | polyketide hydroxylase-related; protein id: At1g2434      | 0.146     | 0.293                 | -0.597    | 0.019                 |
| A000173_01 | At1g44446 | chlorophyll a oxygenase; protein id: At1g44446.1          | -0.982    | -0.926                | -0.93     | -0.515                |
| A000179_01 | At1g34150 | putative protein; protein id: At1g34150.1                 | 0.074     | 0.487                 | NA        | 0.597                 |

|            |           |                                                                                            |        |    |        |        |        |
|------------|-----------|--------------------------------------------------------------------------------------------|--------|----|--------|--------|--------|
| A000185_01 | At1g75400 | hypothetical protein; protein id: At1g75400.1                                              | -0.524 | NA | NA     | NA     |        |
| A000187_01 | At1g10080 | hypothetical protein; protein id: At1g10080.1                                              | -1.352 | NA | NA     | NA     |        |
| A000198_01 | At1g50260 | hypothetical protein; protein id: At1g50260.1                                              | -0.749 | NA | NA     | NA     |        |
| A000202_01 | At1g75460 | protease, putative; protein id: At1g75460.1                                                | NA     | NA |        | -0.887 | -2.193 |
| A000220_01 | At1g27000 | bZIP family transcription factor; protein id: At1g27000.1                                  | -1.029 |    | -0.865 | -0.508 | -0.359 |
| A000223_01 | At1g12050 | fumarylacetoacetate hydrolase-like protein; protein id: At1g12050.1                        | -0.448 |    | -0.236 | -0.588 | -0.454 |
| A000226_01 | At1g17990 | 12-oxophytodienoate reductase, putative; protein id: At1g17990.1                           | NA     | NA | NA     | NA     |        |
| A000233_01 | At1g11940 | hypothetical protein; protein id: At1g11940.1                                              | 0.58   |    | 0.931  | NA     | 0.82   |
| A000239_01 | At1g66740 | hypothetical protein; protein id: At1g66740.1                                              | -0.399 | NA | NA     |        | 0.157  |
| A000248_01 | At1g75870 | hypothetical protein; protein id: At1g75870.1                                              | -0.482 |    | -0.406 | NA     | NA     |
| A000253_01 | At1g20330 | sterol-C-methyltransferase; protein id: At1g20330.1                                        | 0.626  |    | 0.513  | 0.55   | 0.61   |
| A000259_01 | At1g66350 | RGL1; protein id: At1g66350.1                                                              | 0.917  |    | 0.696  | 0.942  | 1.344  |
| A000260_01 | At1g76020 | unknown protein; protein id: At1g76020.1                                                   | -0.374 |    | -0.263 | -0.559 | -1.34  |
| A000261_01 | At1g75230 | 3-methyladenine DNA glycosylase, putative; protein id: At1g75230.1                         | -0.012 |    | 0.273  | 0.151  | 0.17   |
| A000263_01 | At1g75190 | expressed protein; protein id: At1g75190.1                                                 | -0.573 |    | -0.187 | NA     | -0.789 |
| A000268_01 | At1g47260 | unknown protein; protein id: At1g47260.1                                                   | 0.461  |    | 0.186  | 0.326  | 0.855  |
| A000269_01 | At1g60420 | expressed protein; protein id: At1g60420.1                                                 | -0.129 |    | 0.074  | -0.041 | 0.216  |
| A000270_01 | At1g60430 | expressed protein; protein id: At1g60430.1                                                 | -0.749 | NA | NA     | NA     | NA     |
| A000297_01 | At1g69720 | putative heme oxygenase; protein id: At1g69720.1                                           | -0.505 | NA | NA     | NA     | -0.923 |
| A000301_01 | At1g69790 | putative protein kinase; protein id: At1g69790.1                                           | NA     | NA | NA     | NA     | NA     |
| A000302_01 | At1g48310 | hypothetical protein; protein id: At1g48310.1                                              | 0.2    |    | 0.094  | NA     | 0.773  |
| A000303_01 | At1g77220 | expressed protein; protein id: At1g77220.1                                                 | -0.546 | NA | NA     |        | -0.26  |
| A000305_01 | At1g73980 | unknown protein; protein id: At1g73980.1                                                   | -0.795 |    | -0.697 | -0.411 | -0.141 |
| A000319_01 | At1g26820 | ribonuclease, RNS3; protein id: At1g26820.1                                                | -1.539 |    | -1.75  | -0.367 | -1.021 |
| A000321_01 | At1g62360 | homeobox protein, putative; protein id: At1g62360.1                                        | 0.121  | NA | NA     |        | 0.964  |
| A000322_01 | At1g27190 | leucine-rich repeat transmembrane protein kinase, putative; protein id: At1g27190.1        | 0.145  |    | 0.463  | 0.286  | 0.736  |
| A000324_01 | At1g69420 | DHHC-type zinc finger protein, putative; protein id: At1g69420.1                           | 1.261  |    | 1.048  | NA     | 1.401  |
| A000325_01 | At1g20070 | hypothetical protein; protein id: At1g20070.1                                              | -0.817 | NA |        | -1.094 | -1.183 |
| A000326_01 | At1g59750 | auxin response transcription factor (ARF1); protein id: At1g59750.1                        | 0.104  |    | -0.095 | NA     | 0.181  |
| A000329_01 | At1g54570 | expressed protein; protein id: At1g54570.1                                                 | -0.738 |    | -0.7   | NA     | -0.49  |
| A000336_01 | At1g63830 | unknown protein; protein id: At1g63830.1                                                   | 0.001  |    | 0.235  | NA     | -0.11  |
| A000337_01 | At1g54770 | hypothetical protein; protein id: At1g54770.1                                              | 0.095  |    | 0.529  | 0.166  | 0.496  |
| A000340_01 | At1g54830 | heme activated protein, putative; protein id: At1g54830.1                                  | -0.235 |    | 0.417  | 0.219  | 0.338  |
| A000348_01 | At1g80280 | unknown protein; protein id: At1g80280.1                                                   | 1.32   |    | 1.515  | 1.379  | 2.029  |
| A000351_01 | At1g03330 | expressed protein; protein id: At1g03330.1                                                 | 0.172  |    | 0.111  | 0.253  | 0.113  |
| A000352_01 | At1g80270 | hypothetical protein; protein id: At1g80270.1                                              | 1.238  |    | 1.366  | 0.981  | 2.102  |
| A000353_01 | At1g63770 | putative aminopeptidase; protein id: At1g63770.1                                           | -0.266 |    | -0.602 | -0.723 | -0.424 |
| A000355_01 | xxxx      | b/t fructokinase, putative; protein id: At1g03160.1 and At1g03160.2                        | -0.055 |    | 0.514  | NA     | NA     |
| A000358_01 | At1g63660 | GMP synthase; protein id: At1g63660.1                                                      | 0.739  |    | 0.968  | 0.983  | 1.61   |
| A000364_01 | At1g20810 | FKBP-type peptidyl-prolyl cis-trans isomerase; protein id: At1g20810.1                     | -0.55  | NA |        | -0.322 | -0.551 |
| A000365_01 | At1g74290 | unknown protein; protein id: At1g74290.1                                                   | -0.302 | NA | NA     | NA     | NA     |
| A000368_01 | At1g74250 | putative heat shock protein; protein id: At1g74250.1                                       | -0.128 |    | -0.608 | NA     | -0.275 |
| A000371_01 | At1g74230 | glycine-rich RNA-binding protein; protein id: At1g74230.1                                  | 0.551  |    | 0.641  | 0.474  | 0.51   |
| A000373_01 | At1g20770 | hypothetical protein; protein id: At1g20770.1                                              | 0.361  |    | 0.479  | NA     | 0.316  |
| A000377_01 | At1g76350 | hypothetical protein; protein id: At1g76350.1                                              | -0.548 | NA | NA     | NA     | NA     |
| A000382_01 | At1g11080 | serine carboxypeptidase isolog; protein id: At1g11080.1                                    | -1.508 | NA | NA     | NA     | -0.947 |
| A000384_01 | At1g32260 | hypothetical protein; protein id: At1g32260.1                                              | -0.067 |    | 0.269  | NA     | 0.085  |
| A000389_01 | At1g79180 | myb family transcription factor; protein id: At1g79180.1                                   | -2.394 | NA | NA     | NA     | NA     |
| A000396_01 | At3g30122 | pseudogene, gene_id:K17E7.18 unknown protein; protein id: At3g30122.1                      | -0.35  |    | 0.072  | 0.07   | 0.22   |
| A000402_01 | At1g23730 | putative carbonic anhydrase; protein id: At1g23730.1                                       | -0.829 |    | -0.538 | NA     | NA     |
| A000406_01 | At1g32470 | glycine cleavage system H protein precursor, putative; protein id: At1g32470.1             | 0.502  |    | 0.377  | 0.214  | 0.824  |
| A000410_01 | At1g02610 | hypothetical protein; protein id: At1g02610.1                                              | -3.186 |    | -3.129 | -1.851 | -2.355 |
| A000412_01 | At1g70570 | expressed protein; protein id: At1g70570.1                                                 | -0.429 |    | -0.158 | NA     | -0.115 |
| A000419_01 | At1g76320 | far-red impaired response protein, putative; protein id: At1g76320.1                       | -0.312 |    | -0.03  | NA     | 0.139  |
| A000420_01 | At1g67530 | hypothetical protein; protein id: At1g67530.1                                              | -0.849 |    | -0.43  | NA     | NA     |
| A000423_01 | At1g03950 | expressed protein; protein id: At1g03950.1                                                 | -1.123 | NA | NA     | NA     | NA     |
| A000426_01 | At1g03910 | hypothetical protein; protein id: At1g03910.1                                              | 0.106  |    | -0.192 | NA     | 0.057  |
| A000454_01 | At1g36320 | expressed protein; protein id: At1g36320.1                                                 | -0.054 |    | -0.256 | -0.348 | -0.227 |
| A000455_01 | At1g09300 | hypothetical protein; protein id: At1g09300.1                                              | 0.183  | NA |        | 0.169  | 0.791  |
| A000462_01 | At1g04420 | hypothetical protein; protein id: At1g04420.1                                              | 0.039  |    | 0.345  | -0.391 | 0.036  |
| A000471_01 | At1g03687 | hypothetical protein; protein id: At1g03687.1                                              | 0.417  |    | 0.663  | NA     | 0.406  |
| A000473_01 | At1g03710 | hypothetical protein; protein id: At1g03710.1                                              | 0.323  |    | 0.384  | 0.788  | 1.097  |
| A000478_01 | At1g61770 | hypothetical protein; protein id: At1g61770.1                                              | 0.08   |    | 0.495  | 0.161  | -0.014 |
| A000479_01 | At1g35460 | bHLH protein; protein id: At1g35460.1                                                      | -0.551 | NA |        | -0.233 | -0.321 |
| A000489_01 | At1g03550 | expressed protein; protein id: At1g03550.1                                                 | -1.695 |    | -1.326 | -0.847 | -1.75  |
| A000500_01 | At1g73740 | putative UDP-N-acetylglucosamine--N-acetylmuramyl pyrophosphatase; protein id: At1g73740.1 | -0.708 | NA | NA     |        | -0.09  |
| A000511_01 | At1g53730 | leucine-rich repeat transmembrane protein kinase 1; protein id: At1g53730.1                | 0.019  |    | 0.215  | -0.235 | 0.111  |
| A000517_01 | At1g54170 | hypothetical protein; protein id: At1g54170.1                                              | -0.079 |    | -0.016 | NA     | -0.141 |

|            |           |                                                                                       |           |           |           |        |
|------------|-----------|---------------------------------------------------------------------------------------|-----------|-----------|-----------|--------|
| A000519_01 | At1g03140 | expressed protein; protein id: At1g03140.1                                            | -0.242    | -0.269    | -0.404    | -0.269 |
| A000523_01 | At1g03080 | unknown protein; protein id: At1g03080.1                                              | -0.807    | -0.824    | -0.547    | -0.186 |
| A000525_01 | At1g03050 | putative protein destination factor; protein id: At1g03050.1                          | -0.692    | -0.389 NA | NA        |        |
| A000526_01 | At1g03030 | unknown protein; protein id: At1g03030.1                                              | -0.838    | -0.146    | -0.195    | 0.165  |
| A000533_01 | At1g71310 | hypothetical protein; protein id: At1g71310.1                                         | 0.079     | 0.346     | 0.62      | 0.359  |
| A000534_01 | At1g65230 | unknown protein; protein id: At1g65230.1                                              | -0.39     | -0.432    | -0.745    | -0.686 |
| A000543_01 | At1g07440 | tropinone reductase-I, putative; protein id: At1g07440.1                              | -0.68     | -0.788    | -0.345    | -0.277 |
| A000548_01 | At1g19330 | expressed protein; protein id: At1g19330.1                                            | 0.054     | -0.112    | 0.492     | 1.06   |
| A000553_01 | At1g11820 | glycosyl hydrolase family 17; protein id: At1g11820.1                                 | 0.985     | 0.959     | 0.46      | 0.954  |
| A000555_01 | At1g72180 | leucine-rich repeat transmembrane protein kinase, putative; protein id: At1g72180.1   | -0.855 NA | NA        |           | -1.245 |
| A000559_01 | At1g20920 | DEAD/DEAH box RNA helicase, putative; protein id: At1g20920.1                         | -0.32     | 0.034 NA  |           | -0.095 |
| A000567_01 | At1g22190 | AP2 domain transcription factor RAP2, putative; protein id: At1g22190.1               | -2.134    | -1.914    | -0.925    | -1.444 |
| A000568_01 | At1g05620 | expressed protein; protein id: At1g05620.1                                            | 0.019     | 0.046     | -0.077    | 0.254  |
| A000577_01 | At1g72160 | cytosolic factor, putative; protein id: At1g72160.1                                   | -0.92     | -1.098    | -1.096    | -1.068 |
| A000579_01 | At1g72230 | blue copper protein, putative; protein id: At1g72230.1                                | -1.403    | -1.084    | -0.129    | -0.517 |
| A000582_01 | At1g09430 | unknown protein; protein id: At1g09430.1                                              | -1.165    | -1.199    | -1.492    | -1.398 |
| A000589_01 | At1g09520 | expressed protein; protein id: At1g09520.1                                            | 0.003     | 0.319     | 0.28      | 0.536  |
| A000590_01 | At1g51310 | unknown protein; protein id: At1g51310.1                                              | 0.516     | 1.001     | 0.31      | 0.703  |
| A000592_01 | At1g51340 | expressed protein; protein id: At1g51340.1                                            | -1.554    | -1.449 NA |           | -1.037 |
| A000600_01 | At1g29660 | lipase/hydrolase, putative; protein id: At1g29660.1                                   | 0.081     | 0.301     | 0.021     | 0.296  |
| A000608_01 | At1g13190 | RRM-containing protein; protein id: At1g13190.1                                       | -0.287    | -0.098    | -0.498    | -0.51  |
| A000610_01 | At1g20350 | mitochondrial inner membrane translocase component, putative; protein id: At1g20350.1 | NA        | NA        | -0.395    | -0.793 |
| A000612_01 | At1g13245 | expressed protein; protein id: At1g13245.1                                            | -2.247    | -1.989    | -1.182    | -1.9   |
| A000613_01 | At1g13195 | expressed protein; protein id: At1g13195.1                                            | -0.83     | -0.246 NA |           | 0.374  |
| A000618_01 | At1g29530 | hypothetical protein; protein id: At1g29530.1                                         | 0.022 NA  |           | -0.057    | 0.04   |
| A000619_01 | At1g64360 | expressed protein; protein id: At1g64360.1                                            | -4.333    | -4.363 NA | NA        |        |
| A000622_01 | At1g10310 | expressed protein; protein id: At1g10310.1                                            | 0.035     | 0.244     | 0.174     | -0.032 |
| A000629_01 | At1g10390 | unknown protein; protein id: At1g10390.1                                              | -0.054    | -0.154    | -0.196    | -0.178 |
| A000633_01 | At1g71170 | putative dehydrogenase; protein id: At1g71170.1                                       | -0.421    | -0.226    | -0.029    | -0.099 |
| A000637_01 | At1g50410 | DNA-binding protein, putative; protein id: At1g50410.1                                | -0.02 NA  | NA        | NA        |        |
| A000638_01 | At1g29330 | ER lumen protein retaining receptor; protein id: At1g29330.1                          | 0.615     | 0.992     | 0.327     | 0.661  |
| A000639_01 | At1g16320 | unknown protein; protein id: At1g16320.1                                              | -1.399    | -1.622    | -1.052    | -1.761 |
| A000643_01 | At1g29220 | expressed protein; protein id: At1g29220.1                                            | -0.397    | -0.354    | -0.242    | -0.304 |
| A000645_01 | At1g77610 | expressed protein; protein id: At1g77610.1                                            | 0.489     | 0.549     | 0.502     | 0.867  |
| A000649_01 | At1g29130 | hypothetical protein; protein id: At1g29130.1                                         | -0.89 NA  |           | -0.6      | -0.778 |
| A000650_01 | At1g29060 | expressed protein; protein id: At1g29060.1                                            | -0.642    | -0.343    | -0.191    | -0.47  |
| A000652_01 | At1g29050 | expressed protein; protein id: At1g29050.1                                            | -1.81     | -1.725    | -1.178    | -1.636 |
| A000653_01 | At1g11530 | thioredoxin h, putative; protein id: At1g11530.1                                      | -1.796    | -1.723    | -1.108    | -1.44  |
| A000657_01 | At1g43560 | thioredoxin, putative; protein id: At1g43560.1                                        | 0.394     | 0.451     | 0.397     | 0.554  |
| A000665_01 | At1g77710 | unknown protein; protein id: At1g77710.1                                              | -0.309    | -0.121    | -0.138 NA |        |
| A000668_01 | At1g77740 | putative phosphatidylinositol-4-phosphate-5-kinase; protein id: At1g77740.1           | -0.617    | -0.05     | -0.635    | -0.293 |
| A000677_01 | At1g59710 | expressed protein; protein id: At1g59710.1                                            | -0.197 NA | NA        | NA        |        |
| A000684_01 | At1g63060 | expressed protein; protein id: At1g63060.1                                            | -0.754 NA | NA        | NA        |        |
| A000685_01 | At1g33780 | chloroplast lumen common protein family; protein id: At1g33780.1                      | -0.943 NA |           | -0.255    | -0.106 |
| A000687_01 | At1g59890 | hypothetical protein; protein id: At1g59890.1                                         | -0.022    | 0.184 NA  |           | 0.383  |
| A000692_01 | At1g63010 | expressed protein; protein id: At1g63010.1                                            | -0.262    | -0.571    | -0.773    | -0.735 |
| A000696_01 | At1g68830 | putative protein kinase; protein id: At1g68830.1                                      | -1.722    | -1.574    | -1.36     | -1.08  |
| A000697_01 | At1g68900 | hypothetical protein; protein id: At1g68900.1                                         | 0.482     | 0.506     | 0.316     | 0.323  |
| A000700_01 | At1g34220 | hypothetical protein; protein id: At1g34220.1                                         | -0.429    | -0.688    | -0.38     | 0.043  |
| A000701_01 | At1g34190 | NAM protein, putative; protein id: At1g34190.1                                        | -0.356    | -0.379    | -0.15     | 0.135  |
| A000710_01 | At1g48090 | unknown protein; protein id: At1g48090.1                                              | -0.712    | -0.689    | -0.312    | 0.64   |
| A000711_01 | At1g15230 | expressed protein; protein id: At1g15230.1                                            | -0.459    | 0.312     | 0.065     | -0.393 |
| A000722_01 | At1g15415 | hypothetical protein; protein id: At1g15415.1                                         | -0.693    | -0.369    | -0.984 NA |        |
| A000727_01 | At1g49140 | expressed protein; protein id: At1g49140.1                                            | 0.274     | 0.37      | 0.087     | -0.023 |
| A000731_01 | At1g21640 | expressed protein; protein id: At1g21640.1                                            | NA        | NA        | NA        | -1.798 |
| A000742_01 | At1g18450 | expressed protein; protein id: At1g18450.1                                            | 0.425     | 0.482     | 0.39      | 0.599  |
| A000755_01 | At1g24520 | putative agp1; protein id: At1g24520.1                                                | -0.68     | -0.431    | -0.689    | -1.661 |
| A000757_01 | At1g24560 | putative myosin heavy chain; protein id: At1g24560.1                                  | -0.382 NA | NA        | NA        |        |
| A000759_01 | At1g47550 | unknown protein; protein id: At1g47550.1                                              | 0.171     | -0.068    | -0.436    | 0.278  |
| A000764_01 | At1g36280 | adenylosuccinate lyase-like protein; protein id: At1g36280.1                          | 0.754     | 0.726     | 0.166     | 0.369  |
| A000770_01 | At1g27560 | unknown protein; protein id: At1g27560.1                                              | -0.242    | -0.085    | -0.278    | 0.088  |
| A000775_01 | At1g33400 | unknown protein; protein id: At1g33400.1                                              | 0.011     | 0.286 NA  |           | 0.139  |
| A000781_01 | At1g33490 | expressed protein; protein id: At1g33490.1                                            | -0.933    | -0.636    | -0.262    | -0.495 |
| A000782_01 | At1g68710 | ATPase, putative; protein id: At1g68710.1                                             | 0.364     | 0.253     | 0.718     | 1.808  |
| A000794_01 | At1g11280 | serine/threonine kinase, putative; protein id: At1g11280.1                            | 0.515     | 0.436 NA  |           | 0.967  |
| A000795_01 | At1g66980 | kinase, putative; protein id: At1g66980.1                                             | -0.848    | -1.098    | -1.66     | -1.41  |
| A000801_01 | At1g76900 | Tub family protein, putative; protein id: At1g76900.1                                 | -0.649    | -0.752    | -0.222    | -0.082 |
| A000802_01 | At1g75010 | hypothetical protein; protein id: At1g75010.1                                         | 0.429     | 0.778 NA  |           | 0.491  |

|            |           |                                                         |        |        |        |        |
|------------|-----------|---------------------------------------------------------|--------|--------|--------|--------|
| A000803_01 | At1g67080 | expressed protein; protein id: At1g67080.1              | -0.452 | -0.659 | 0.044  | 0.266  |
| A000807_01 | At1g53380 | unknown protein; protein id: At1g53380.1                | 0.407  | 0.747  | 0.429  | 0.887  |
| A000808_01 | At1g72060 | unknown protein; protein id: At1g72060.1                | NA     | NA     | NA     | NA     |
| A000814_01 | At1g74840 | myb family transcription factor; protein id: At1g7484   | -1.332 | -1.15  | -0.917 | -0.833 |
| A000827_01 | At1g80160 | expressed protein; protein id: At1g80160.1              | -3.532 | -3.311 | -1.417 | -3.141 |
| A000828_01 | At1g80180 | expressed protein; protein id: At1g80180.1              | -3.338 | -3.163 | -1.505 | -2.846 |
| A000835_01 | At1g26470 | expressed protein; protein id: At1g26470.1              | 0.057  | 0.574  | 0.515  | 0.195  |
| A000842_01 | At1g70770 | unknown protein; protein id: At1g70770.1                | 0.03   | NA     | -0.292 | -0.063 |
| A000851_01 | At1g52710 | unknown protein; protein id: At1g52710.1                | -1.22  | NA     | NA     | -0.466 |
| A000853_01 | At1g52680 | expressed protein; protein id: At1g52680.1              | -0.542 | -0.467 | NA     | -1.537 |
| A000856_01 | At1g27300 | expressed protein; protein id: At1g27300.1              | -1.49  | -1.619 | -0.551 | -1.001 |
| A000875_01 | At1g72880 | unknown protein; protein id: At1g72880.1                | 0.032  | 0.185  | NA     | 0.159  |
| A000880_01 | At1g25480 | hypothetical protein; protein id: At1g25480.1           | -1.135 | NA     | NA     | NA     |
| A000888_01 | At1g50730 | hypothetical protein; protein id: At1g50730.1           | -0.484 | NA     | -0.618 | -0.936 |
| A000897_01 | At1g02870 | expressed protein; protein id: At1g02870.1              | 0.665  | 0.848  | NA     | 0.503  |
| A000903_01 | At1g28310 | Dof zinc finger protein; protein id: At1g28310.1        | -1.545 | NA     | NA     | NA     |
| A000910_01 | At1g31920 | PPR-repeat protein, putative; protein id: At1g31920.    | -0.091 | NA     | NA     | 0.594  |
| A000919_01 | At1g26160 | expressed protein; protein id: At1g26160.1              | -0.119 | 0.172  | -0.115 | -0.132 |
| A000922_01 | At1g80700 | hypothetical protein; protein id: At1g80700.1           | 0.589  | 0.808  | NA     | 0.683  |
| A000936_01 | At1g80940 | expressed protein; protein id: At1g80940.1              | -0.816 | -0.631 | -0.374 | -0.764 |
| A000937_01 | At1g80950 | expressed protein; protein id: At1g80950.1              | -0.614 | -0.765 | -0.793 | -0.697 |
| A000941_01 | At1g56180 | expressed protein; protein id: At1g56180.1              | NA     | NA     | -0.254 | -0.73  |
| A000945_01 | At1g56050 | GTP-binding protein, putative; protein id: At1g56050    | 1.089  | NA     | NA     | 0.588  |
| A000953_01 | At1g67350 | expressed protein; protein id: At1g67350.1              | 0.297  | 0.289  | 0.222  | 0.041  |
| A000960_01 | At1g47200 | genomic sequence for A.t. BAC T22C5 from chrom          | 0.36   | 0.662  | 0.642  | 0.664  |
| A000962_01 | At1g29880 | glycyl tRNA synthetase, putative; protein id: At1g29    | 0.41   | 0.395  | 0.261  | 0.315  |
| A000970_01 | At5g10330 | putative histidinol-phosphate aminotransferase          | 0.698  | 0.411  | 0.42   | 1.246  |
| A000974_01 | At1g06690 | expressed protein; protein id: At1g06690.1              | 0.355  | 0.373  | -0.336 | -0.228 |
| A000984_01 | At1g28490 | syntaxin SYP6 family; protein id: At1g28490.1           | 0.303  | 0.387  | 0.197  | 0.159  |
| A000987_01 | At1g15940 | hypothetical protein; protein id: At1g15940.1           | 0.434  | 0.271  | NA     | 0.461  |
| A000988_01 | At1g15980 | expressed protein; protein id: At1g15980.1              | -0.165 | -0.363 | -0.57  | -0.518 |
| A000992_01 | At1g14900 | linker histone protein, putative; protein id: At1g1490  | 0.941  | 0.96   | 0.766  | 0.749  |
| A000997_01 | At1g16180 | unknown protein; protein id: At1g16180.1                | -0.368 | -0.557 | -0.291 | -0.44  |
| A001006_01 | At1g75310 | unknown protein; protein id: At1g75310.1                | 0.508  | 0.499  | NA     | 0.769  |
| A001007_01 | At1g76580 | unknown protein; protein id: At1g76580.1                | -0.642 | -0.366 | NA     | -0.343 |
| A001011_01 | At1g69170 | squamosa-promoter binding protein, putative; protei     | -0.787 | -0.394 | NA     | 0.422  |
| A001012_01 | At1g27360 | putative squamosa-promoter binding protein 2; prot      | 0.354  | 0.313  | 0.714  | 1.258  |
| A001017_01 | At1g09140 | arginine/serine-rich splicing factor, atSRp30; proteir  | -0.816 | -0.543 | -0.254 | -0.418 |
| A001019_01 | At1g01170 | unknown protein; protein id: At1g01170.1                | -0.25  | -0.282 | -0.18  | -0.644 |
| A001023_01 | At1g01070 | expressed protein; protein id: At1g01070.1              | NA     | NA     | NA     | 0.643  |
| A001029_01 | At1g04640 | lipoyltransferase; protein id: At1g04640.1              | -0.465 | NA     | -0.64  | -0.978 |
| A001031_01 | At1g26130 | P-type transporting ATPase, putative; protein id: At    | -0.097 | 0.379  | NA     | 0.138  |
| A001032_01 | At1g18640 | 3-phosphoserine phosphatase; protein id: At1g1864       | 0.615  | 0.639  | 0.494  | 0.56   |
| A001034_01 | At1g18700 | unknown protein; protein id: At1g18700.1                | 0.164  | 0.486  | -0.24  | -0.29  |
| A001035_01 | At1g25682 | unknown protein; protein id: At1g25682.1                | -0.471 | -0.249 | -0.241 | -0.197 |
| A001036_01 | At1g49720 | A.t. mRNA for 65kDa regulatory subunit of PP 2A         | -0.493 | -0.432 | -0.528 | -0.905 |
| A001041_01 | At1g68010 | hydroxypyruvate reductase (HPR); protein id: At1g6      | -0.855 | -0.682 | -0.348 | -0.264 |
| A001042_01 | At1g05810 | ras-related GTP-binding protein (ARA-1); protein id:    | 0.163  | 0.651  | NA     | NA     |
| A001043_01 | At1g64740 | alpha-tubulin, putative; protein id: At1g64740.1        | -0.572 | -0.137 | -0.282 | -0.453 |
| A001044_01 | At1g75040 | thaumatin-like protein; protein id: At1g75040.1         | 0.444  | 0.857  | 1.059  | 1.722  |
| A001045_01 | At1g64040 | phosphoprotein phosphatase-type 1 catalytic subun       | -0.411 | -0.212 | -0.248 | 0.009  |
| A001048_01 | At1g05890 | unknown protein; protein id: At1g05890.1                | -0.644 | -0.73  | -0.558 | -0.813 |
| A001052_01 | At1g14980 | 10 kDa chaperonin (CPN10); protein id: At1g14980.       | 0.762  | 0.705  | 0.611  | 0.541  |
| A001053_01 | At1g05790 | putative NPK1-related protein kinase 2; protein id: A   | -0.511 | -0.482 | NA     | 0.031  |
| A001056_01 | At1g37150 | biotin holocarboxylase synthetase, putative; protein    | -0.566 | -0.05  | -0.158 | 0.238  |
| A001059_01 | At1g32900 | starch synthase, putative; protein id: At1g32900.1      | 0.806  | 0.845  | 0.413  | 1.394  |
| A001071_01 | At1g32870 | NAM protein, putative; protein id: At1g32870.1          | -0.768 | NA     | NA     | -0.072 |
| A001077_01 | At1g04870 | expressed protein; protein id: At1g04870.1              | -0.438 | NA     | 0.176  | 0.353  |
| A001082_01 | At1g04985 | unknown protein; protein id: At1g04985.1                | -0.494 | -0.07  | -0.641 | -0.52  |
| A001086_01 | At1g60940 | putative serine/threonine-protein kinase; protein id: . | -0.766 | -1.002 | -0.694 | -1.247 |
| A001087_01 | At1g13360 | unknown protein; protein id: At1g13360.1                | NA     | NA     | -1.392 | -1.383 |
| A001088_01 | xxxx      | b/t carboxypeptidase, putative At1g71696 and cholii     | 0.311  | 0.454  | 0.305  | 0.976  |
| A001089_01 | At1g71710 | ribosomal protein, putative; protein id: At1g71710.1    | -0.026 | NA     | NA     | NA     |
| A001090_01 | At1g71720 | ribosomal protein, putative; protein id: At1g71720.1    | 0.145  | 0.094  | -0.082 | 0.061  |
| A001091_01 | At1g64680 | expressed protein; protein id: At1g64680.1              | -1.346 | -1.016 | -0.797 | -1.547 |
| A001092_01 | At1g64860 | plastid RNA polymerase sigma-subunit; protein id: A     | -0.868 | -0.978 | -1.645 | -1.204 |
| A001093_01 | At1g79270 | expressed protein; protein id: At1g79270.1              | -2.003 | -2.062 | NA     | -1.384 |
| A001095_01 | At1g62480 | expressed protein; protein id: At1g62480.1              | -0.489 | -0.109 | 0.029  | -0.502 |

|            |           |                                                                                         |           |           |        |        |
|------------|-----------|-----------------------------------------------------------------------------------------|-----------|-----------|--------|--------|
| A001098_01 | At1g35780 | expressed protein; protein id: At1g35780.1                                              | 0.727     | 0.666     | 0.851  | 1.232  |
| A001099_01 | At1g56720 | expressed protein; protein id: At1g56720.1                                              | -0.431    | -0.36 NA  |        | 0.845  |
| A001100_01 | At1g69360 | expressed protein; protein id: At1g69360.1                                              | -0.817    | -0.477    | -0.684 | -0.129 |
| A001102_01 | At1g07210 | hypothetical protein; protein id: At1g07210.1                                           | 1.135     | 1.073     | 0.811  | 1.265  |
| A001103_01 | At1g01060 | DNA-binding protein, putative; protein id: At1g01060.1                                  | -0.637    | -0.734    | 0.573  | 0.788  |
| A001105_01 | At1g14330 | hypothetical protein; protein id: At1g14330.1                                           | -1.055 NA |           | -0.87  | -0.574 |
| A001106_01 | At1g14345 | expressed protein; protein id: At1g14345.1                                              | -0.053 NA |           | 0.185  | -0.605 |
| A001107_01 | At1g75820 | CLAVATA1 receptor kinase (CLV1); protein id: At1g75820.1                                | -0.782    | -0.405    | -0.635 | -0.779 |
| A001113_01 | At1g14450 | expressed protein; protein id: At1g14450.1                                              | 0.022     | 0.172     | 0.476  | 0.222  |
| A001115_01 | At1g32100 | pinosresinol-lariciresinol reductase, putative; protein id: At1g32100.1                 | -1.943    | -2.511    | -0.744 | -0.949 |
| A001121_01 | At1g58180 | carbonic anhydrase, putative; protein id: At1g58180.1                                   | -2.248    | -2.438    | -1.471 | -1.939 |
| A001122_01 | At1g13320 | protein phosphatase 2A regulatory subunit, putative; protein id: At1g13320.1            | 0.142     | 0.447     | 0.049  | 0.278  |
| A001126_01 | At1g43860 | expressed protein; protein id: At1g43860.1                                              | 0.189 NA  |           | -0.097 | 0.422  |
| A001127_01 | At1g07810 | ER-type Ca <sup>2+</sup> -pump protein; protein id: At1g07810.1                         | -0.482    | -0.401    | -0.246 | 0.061  |
| A001128_01 | At1g05070 | expressed protein; protein id: At1g05070.1                                              | -0.036    | 0.305     | 0.295  | 0.195  |
| A001129_01 | At1g78370 | glutathione transferase, putative; protein id: At1g78370.1                              | 0.603     | 0.438     | 1.068  | 1.141  |
| A001131_01 | At1g53400 | pinosresinol-lariciresinol reductase, putative; protein id: At1g53400.1                 | -0.498    | -0.365    | -0.231 | 0.09   |
| A001134_01 | At1g05120 | similar to DNA repair protein-like; protein id: At1g05120.1                             | -0.146    | -0.073 NA |        | 0.375  |
| A001135_01 | At1g35720 | Ca <sup>2+</sup> -dependent membrane-binding protein annexin I; protein id: At1g35720.1 | 1.138     | 1.114     | 1.017  | 1.512  |
| A001136_01 | At1g21410 | F-box protein family; protein id: At1g21410.1                                           | -1.769    | -1.384    | -1.055 | -0.731 |
| A001137_01 | At1g30690 | expressed protein; protein id: At1g30690.1                                              | 0.453     | 1.073 NA  |        | 1.196  |
| A001138_01 | At1g51650 | epsilon subunit of mitochondrial F1-ATPase; protein id: At1g51650.1                     | 0.432     | 0.344     | 0.428  | 0.103  |
| A001140_01 | At1g14910 | unknown protein; protein id: At1g14910.1                                                | -0.056    | 0.345     | -0.022 | 0.121  |
| A001141_01 | At1g06950 | chloroplast inner envelope protein, putative; protein id: At1g06950.1                   | 1.015     | 0.75      | 0.089  | 0.517  |
| A001142_01 | At1g44820 | aminoacylase, putative; protein id: At1g44820.1                                         | -0.736 NA |           | -0.867 | -0.835 |
| A001144_01 | At1g72260 | thionin; protein id: At1g72260.1                                                        | 2.142     | 1.407     | 1.432  | 2.083  |
| A001146_01 | At1g48920 | nucleolin, putative; protein id: At1g48920.1                                            | 0.487     | 0.52      | 0.602  | 0.647  |
| A001147_01 | At1g60870 | expressed protein; protein id: At1g60870.1                                              | -0.733    | -0.498    | -0.155 | -1.02  |
| A001153_01 | At1g80380 | auxin-regulated protein; protein id: At1g80380.2                                        | -0.527    | -0.266    | -0.56  | -0.724 |
| A001154_01 | At1g21780 | unknown protein; protein id: At1g21780.1                                                | -1.207    | -0.928    | -0.597 | -0.962 |
| A001155_01 | At1g69490 | expressed protein; protein id: At1g69490.1                                              | -2.884    | -3.215    | -0.586 | -0.808 |
| A001159_01 | At1g80050 | adenine phosphoribosyltransferase; protein id: At1g80050.1                              | -0.394    | -0.14 NA  |        | -0.269 |
| A001163_01 | At1g54410 | water stress-induced protein, putative; protein id: At1g54410.1                         | -0.053    | -0.67     | -0.49  | -0.414 |
| A001165_01 | At1g13280 | allene oxide cyclase, putative; protein id: At1g13280.1                                 | 0.535     | 0.98      | 1.034  | 1.533  |
| A001166_01 | At1g45130 | glycosyl hydrolase family 35 (beta-galactosidase); protein id: At1g45130.1              | 1.312     | 1.316     | 0.738  | 1.488  |
| A001169_01 | At1g21750 | putative protein disulfide isomerase precursor; protein id: At1g21750.1                 | 0.673     | 0.752     | 0.226  | 0.755  |
| A001180_01 | At1g70290 | trehalose-6-phosphate synthase, putative; protein id: At1g70290.1                       | -2.445    | -2.154    | -1.784 | -1.762 |
| A001181_01 | At1g79740 | hypothetical protein; protein id: At1g79740.1                                           | -0.273    | 0.084 NA  |        | -0.009 |
| A001184_01 | At1g22700 | expressed protein; protein id: At1g22700.2                                              | -0.037    | 0.096     | -0.311 | -0.153 |
| A001186_01 | At1g30380 | photosystem I subunit X precursor; protein id: At1g30380.1                              | 0.145     | -0.024    | -0.287 | -0.45  |
| A001187_01 | At1g14740 | expressed protein; protein id: At1g14740.1                                              | -0.122 NA |           | -0.951 | -0.483 |
| A001188_01 | At1g22710 | putative sucrose transport protein, SUC2; protein id: At1g22710.1                       | -1.683    | -1.477    | -0.664 | -1.267 |
| A001189_01 | At1g06410 | trehalose-6-phosphate synthase, putative; protein id: At1g06410.1                       | -0.368    | -0.438    | -0.755 | -0.329 |
| A001190_01 | At1g53800 | expressed protein; protein id: At1g53800.1                                              | 0.1       | 0.468     | -0.075 | 0.503  |
| A001197_01 | At1g27320 | putative sensory transduction histidine kinase; protein id: At1g27320.1                 | -1.562 NA | NA        |        | -1.638 |
| A001199_01 | At1g07010 | unknown protein; protein id: At1g07010.1                                                | -1.006    | -0.997    | -0.579 | -0.309 |
| A001207_01 | At1g20020 | ferredoxin-NADP reductase precursor, putative; protein id: At1g20020.1                  | 0.357     | 0.04      | -0.737 | -0.481 |
| A001209_01 | At1g20450 | expressed protein; protein id: At1g20450.1                                              | 0.493     | 0.425     | -0.521 | -0.459 |
| A001210_01 | At1g49480 | expressed protein; protein id: At1g49480.1                                              | 0.07      | 0.327 NA  |        | 0.369  |
| A001211_01 | At1g80670 | mRNA export protein, putative; protein id: At1g80670.1                                  | 0.018     | 0.579     | 0.093  | 0.287  |
| A001212_01 | At1g56220 | expressed protein; protein id: At1g56220.1                                              | -1.659    | -1.437    | -0.489 | -0.968 |
| A001215_01 | At1g12240 | glycosyl hydrolase family 32; protein id: At1g12240.1                                   | -0.455    | -0.405    | -0.991 | -0.98  |
| A001216_01 | At1g74020 | strictosidine synthase family; protein id: At1g74020.1                                  | -2.677    | -2.275    | -1.724 | -2.212 |
| A001217_01 | At1g13440 | glyceraldehyde-3-phosphate dehydrogenase, putative; protein id: At1g13440.1             | -0.419    | -0.343    | 0.384  | 1.021  |
| A001218_01 | At1g67440 | hypothetical protein; protein id: At1g67440.1                                           | 0.076     | 0.168     | -0.498 | -0.307 |
| A001219_01 | At1g32160 | expressed protein; protein id: At1g32160.1                                              | -0.851 NA | NA        |        | -0.264 |
| A001222_01 | At1g78320 | glutathione transferase, putative; protein id: At1g78320.1                              | -1.381    | -1.007    | -0.38  | -0.978 |
| A001223_01 | At1g78150 | unknown protein; protein id: At1g78150.1                                                | 0.046     | -0.012    | 0.272  | 0.537  |
| A001227_01 | At1g78280 | unknown protein; protein id: At1g78280.1                                                | -0.518    | -0.674    | -1.13  | -0.989 |
| A001229_01 | At1g12090 | pEARL1 1-like protein; protein id: At1g12090.1                                          | 0.252     | 0.396     | 0.072  | -0.393 |
| A001230_01 | At1g53280 | expressed protein; protein id: At1g53280.1                                              | 0.318     | 0.481 NA  |        | 0.81   |
| A001231_01 | At1g63940 | monodehydroascorbate reductase, putative; protein id: At1g63940.1                       | 1.026     | 1         | 0.454  | 0.872  |
| A001232_01 | At1g69370 | chorismate mutase, putative; protein id: At1g69370.1                                    | 0.359 NA  |           | 0.311  | 0.749  |
| A001234_01 | At1g64230 | E2, ubiquitin-conjugating enzyme, putative; protein id: At1g64230.1                     | -1.141    | -0.645    | -0.641 | -0.904 |
| A001235_01 | At1g66150 | receptor protein kinase (TMK1), putative; protein id: At1g66150.1                       | 0.371     | 0.166     | -0.222 | 0.314  |
| A001237_01 | At1g67480 | unknown protein; protein id: At1g67480.1                                                | -0.557    | -0.473    | -0.569 | -0.394 |
| A001240_01 | At1g28260 | hypothetical protein; protein id: At1g28260.1                                           | -1.46     | -0.952    | -1.12  | -0.689 |
| A001241_01 | At1g64880 | expressed protein; protein id: At1g64880.1                                              | 1.189     | 0.825     | 0.728  | 1.308  |

|            |           |                                                          |           |           |        |        |
|------------|-----------|----------------------------------------------------------|-----------|-----------|--------|--------|
| A001242_01 | At1g52400 | glycosyl hydrolase family 1, beta-glucosidase (BG1)      | 1.588     | 1.183     | 1.615  | 3.084  |
| A001244_01 | At1g64990 | hypothetical protein; protein id: At1g64990.1            | -0.214 NA |           | -0.231 | -0.013 |
| A001245_01 | xxxx      | b/t unknown protein; protein id: At1g65590.1 and gly     | -0.039 NA |           | -0.492 | -0.216 |
| A001246_01 | At1g21450 | scarecrow-like 1; protein id: At1g21450.1                | -1.898    | 0.122     | -0.31  | -0.231 |
| A001247_01 | At1g50420 | scarecrow-like 3; protein id: At1g50420.1                | -1.46     | -0.806 NA |        | -0.297 |
| A001248_01 | At1g63120 | membrane protein, putative; protein id: At1g63120.1      | -0.919    | -1.182    | -0.512 | -0.767 |
| A001250_01 | At1g03090 | putative 3-methylcrotonyl-CoA carboxylase; protein       | -1.022    | -0.951    | -1.462 | -0.923 |
| A001251_01 | At1g10830 | expressed protein; protein id: At1g10830.1               | 0.027     | 0.298     | -0.08  | -0.034 |
| A001254_01 | At1g18270 | unknown protein; protein id: At1g18270.1                 | -1.696    | -1.669    | -1.101 | -0.794 |
| A001255_01 | At1g07745 | hypothetical protein; protein id: At1g07745.1            | -0.262    | 0.225 NA  |        | NA     |
| A001257_01 | At1g15060 | hypothetical protein; protein id: At1g15060.1            | -0.506    | -0.129 NA |        | 0.446  |
| A001260_01 | xxxx      | b/t hypothetical protein; protein id: At1g07690.1 and    | -0.436 NA |           | -0.336 | 0.078  |
| A001261_01 | At1g36370 | putative hydroxymethyltransferase; protein id: At1g3     | -1.241    | -0.965    | -0.933 | -0.957 |
| A001263_01 | At1g20380 | prolyl endopeptidase, putative; protein id: At1g2038     | -1.224    | -0.859 NA |        | 0.017  |
| A001273_01 | At1g62960 | 1-aminocyclopropane-1-carboxylate synthase, putat        | -0.458    | -0.349    | -0.284 | -0.479 |
| A001281_01 | At1g01940 | hypothetical protein; protein id: At1g01940.1            | 0.397     | 0.452     | 0.139  | -0.319 |
| A001283_01 | At1g57760 | hypothetical protein; protein id: At1g57760.1            | -0.1      | 0.053     | 0.32   | 0.105  |
| A001284_01 | At1g79040 | photosystem II polypeptide, putative; protein id: At1    | -1.73     | -1.595    | -0.911 | -0.984 |
| A001285_01 | At1g50020 | tubulin alpha-6 chain, putative; protein id: At1g5002    | -1.232    | -1.334    | -0.852 | -1.523 |
| A001289_01 | At1g35680 | 50S ribosomal protein L21 chloroplast precursor (Cl      | 0.695     | 0.681     | 0.165  | 0.935  |
| A001291_01 | At1g44760 | hypothetical protein; protein id: At1g44760.1            | 0.546     | 0.795     | 0.664  | 0.705  |
| A001293_01 | At1g44790 | expressed protein; protein id: At1g44790.1               | 0.254     | 0.232     | 0.256  | 0.258  |
| A001296_01 | At1g48840 | unknown protein; protein id: At1g48840.1                 | -0.766    | -0.459    | -0.898 | -0.39  |
| A001297_01 | At1g44920 | expressed protein; protein id: At1g44920.1               | 0.164     | 0.213     | 0.062  | -0.214 |
| A001298_01 | At1g57770 | hypothetical protein; protein id: At1g57770.1            | 0.759     | 0.853     | -0.287 | -0.207 |
| A001299_01 | At1g07600 | metallothionein-like protein; protein id: At1g07600.1    | -2.041    | -3.229    | -1.564 | -2.657 |
| A001302_01 | At1g69700 | AtHVA22c; protein id: At1g69700.1                        | 1.237     | 1.219     | 0.822  | 0.703  |
| A001303_01 | At1g15670 | expressed protein; protein id: At1g15670.1               | -2.592    | -2.578    | -1.484 | -1.866 |
| A001306_01 | At1g01710 | acyl CoA thioesterase, putative; protein id: At1g017     | -0.28     | -0.215 NA |        | -0.068 |
| A001308_01 | At1g01725 | expressed protein; protein id: At1g01725.1               | -1.17     | -0.565    | -0.433 | -0.953 |
| A001309_01 | At1g75210 | cytosolic IMP-GMP specific 5'-nucleotidase, putativ      | -0.165    | -0.161    | -0.016 | 0.247  |
| A001311_01 | At1g75350 | chloroplast 50S ribosomal protein L31, putative; pro     | 0.399     | 0.288     | 0.1    | -0.492 |
| A001317_01 | At1g01930 | expressed protein; protein id: At1g01930.1               | -0.185    | -0.073 NA |        | -0.141 |
| A001318_01 | At1g09310 | expressed protein; protein id: At1g09310.1               | 0.275     | -0.089    | 0.671  | 0.562  |
| A001324_01 | At1g36730 | eukaryotic translation initiation factor 5, putative; pr | 0.016     | -0.094    | -0.437 | -0.187 |
| A001325_01 | At1g53590 | expressed protein; protein id: At1g53590.1               | -0.309    | -0.32 NA  |        | 0.119  |
| A001326_01 | At1g65070 | hypothetical protein; protein id: At1g65070.1            | 0.425     | -0.044 NA |        | 0.435  |
| A001329_01 | At1g31330 | photosystem I subunit III precursor, putative; protei    | 0.375     | -0.276    | -0.224 | -0.613 |
| A001331_01 | At1g26230 | chaperonin precursor, putative; protein id: At1g2623     | 0.188 NA  | NA        |        | 0.352  |
| A001332_01 | At1g12770 | unknown protein; protein id: At1g12770.1                 | 0.599     | 0.456     | 0.232  | 0.288  |
| A001333_01 | At1g69510 | expressed protein; protein id: At1g69510.1               | -0.535    | -0.742    | -0.162 | -0.444 |
| A001334_01 | At1g12820 | transport inhibitor response 1 (TIR1), putative; prote   | -0.502    | -0.428    | -0.244 | -0.308 |
| A001339_01 | At1g02860 | expressed protein; protein id: At1g02860.1               | -1.6 NA   |           | -1.18  | -1.725 |
| A001340_01 | At1g33140 | ribosomal protein L9, putative; protein id: At1g33140    | 0.839     | 0.992     | 0.84   | 1.157  |
| A001345_01 | At1g67280 | glyoxalase I, putative (lactoylglutathione lyase); prot  | 0.168     | -0.229    | -0.362 | -0.127 |
| A001347_01 | At1g08620 | hypothetical protein; protein id: At1g08620.1            | -0.415    | -0.333 NA |        | -0.272 |
| A001348_01 | At1g64090 | hypothetical protein; protein id: At1g64090.1            | 0.289     | 0.473     | 0.375  | 0.664  |
| A001350_01 | At1g19180 | expressed protein; protein id: At1g19180.1               | -0.293    | -0.295    | -0.325 | -0.267 |
| A001351_01 | At4g00585 | expressed protein; protein id: At4g00585.1               | 0.631     | 0.497     | 0.863  | 0.317  |
| A001352_01 | At1g74710 | isochorismate synthase 1 (isochorismate mutase) (I       | -0.23     | 0.478 NA  |        | 0.918  |
| A001353_01 | At1g71900 | expressed protein; protein id: At1g71900.1               | 0.285     | 0.279 NA  |        | 0.247  |
| A001355_01 | At1g30795 | expressed protein; protein id: At1g30795.1               | 1.451     | 1.206     | 1.005  | 1.451  |
| A001356_01 | At1g43700 | VirE2-interacting protein VIP1; protein id: At1g43700    | -0.817    | -0.884    | -0.537 | -0.801 |
| A001357_01 | At1g77000 | F-box protein family, AtFBL5; protein id: At1g77000      | -0.642    | -0.441    | 0.028  | 0.077  |
| A001358_01 | At1g64650 | unknown protein; protein id: At1g64650.1                 | 0.688     | 0.815     | 0.436  | 0.371  |
| A001360_01 | At1g59840 | hypothetical protein; protein id: At1g59840.1            | 0.337     | 0.531     | 0.183  | 0.376  |
| A001363_01 | At1g23820 | putative spermidine synthase; protein id: At1g23820      | 0.271     | 0.183     | 0.25   | 0.421  |
| A001369_01 | At1g10522 | expressed protein; protein id: At1g10522.1               | 1.804     | 1.665     | 1.296  | 1.604  |
| A001374_01 | At1g25330 | helix-loop-helix protein homolog, putative; protein id   | 1.822     | 1.257     | 1.58   | 2.428  |
| A001375_01 | At1g02790 | polygalacturonase, putative; protein id: At1g02790.1     | -0.47     | -0.722    | -0.714 | -1.066 |
| A001376_01 | At1g10580 | putative pre-mRNA splicing factor; protein id: At1g1     | 0.38      | -0.057    | -0.176 | 0.195  |
| A001378_01 | At1g32460 | expressed protein; protein id: At1g32460.1               | -1.305    | -0.916    | -0.471 | -1.089 |
| A001380_01 | At1g31850 | unknown protein; protein id: At1g31850.1                 | 0.823     | 0.876     | 0.615  | 0.906  |
| A001387_01 | At1g01300 | chloroplast nucleoid DNA binding protein, putative; p    | 0.793     | 1.334     | 0.856  | 1.096  |
| A001389_01 | At1g29850 | expressed protein; protein id: At1g29850.1               | 0.01      | -0.55     | -0.013 | -0.463 |
| A001390_01 | At1g45976 | S-ribonuclease binding protein SBP1, putative; prot      | -0.981    | -0.881    | -0.58  | -0.517 |
| A001392_01 | At1g19660 | expressed protein; protein id: At1g19660.1               | -1.82     | -2.003    | -1.332 | -1.364 |
| A001396_01 | At1g44350 | gr1 protein; protein id: At1g44350.1                     | 0.306 NA  |           | -0.666 | -0.783 |

|            |           |                                                           |        |        |        |        |
|------------|-----------|-----------------------------------------------------------|--------|--------|--------|--------|
| A001399_01 | At1g59124 | disease resistance protein (CC-NBS-LRR class), pu         | -0.357 | -0.333 | 0.063  | -0.051 |
| A001400_01 | At1g21900 | transmembrane protein, putative; protein id: At1g21       | 0.044  | -0.28  | 0.074  | -0.163 |
| A001401_01 | At1g33290 | unknown protein; protein id: At1g33290.1                  | -0.003 | 0.11   | -0.189 | -0.384 |
| A001409_01 | At1g14150 | PsbQ domain protein family; protein id: At1g14150.        | -0.33  | 0.038  | -0.421 | -0.476 |
| A001410_01 | At1g73540 | unknown protein; protein id: At1g73540.1                  | NA     | NA     | NA     | NA     |
| A001411_01 | At1g73660 | putative protein kinase; protein id: At1g73660.1          | -0.257 | -0.29  | 0.038  | -0.111 |
| A001412_01 | At1g76990 | expressed protein; protein id: At1g76990.1                | -0.074 | -0.425 | -0.149 | -0.055 |
| A001417_01 | At1g17110 | ubiquitin-specific protease 15 (UBP15); protein id: A     | 0.012  | 0.066  | NA     | NA     |
| A001418_01 | At1g75220 | integral membrane protein, putative; protein id: At1g     | -0.3   | -0.664 | -0.811 | -0.93  |
| A001420_01 | At1g27370 | putative squamosa-promoter binding protein 2; prot        | 0.884  | 0.978  | 0.788  | 1.433  |
| A001421_01 | At1g15690 | inorganic pyrophosphatase, putative; protein id: At1      | -0.245 | 0.087  | -0.227 | -0.077 |
| A001426_01 | At1g17210 | hypothetical protein; protein id: At1g17210.1             | -0.615 | -0.719 | -0.947 | -0.832 |
| A001428_01 | At1g76080 | chloroplast drought-induced stress protein, putative      | -0.228 | -0.507 | -0.656 | -0.72  |
| A001429_01 | At1g70710 | glycosyl hydrolase family 9 (endo-1,4-beta-glucanas       | 0.8    | 1.329  | 0.959  | 1.259  |
| A001432_01 | At1g61900 | hypothetical protein; protein id: At1g61900.1             | 0.107  | NA     | -0.21  | 0.418  |
| A001435_01 | At1g62510 | similar to 14KD proline-rich protein DC2.15 precurs       | -1.628 | -1.534 | -0.703 | -2.105 |
| A001436_01 | At1g50460 | hexokinase, putative; protein id: At1g50460.1             | 0.534  | 0.643  | 0.08   | 0.139  |
| A001441_01 | At1g50250 | chloroplast FtsH protease; protein id: At1g50250.1        | -1.051 | -1.308 | -1.017 | -1.417 |
| A001442_01 | At1g10670 | ATP citrate-lyase, putative; protein id: At1g10670.1      | 0.391  | 0.122  | 0.01   | 0.136  |
| A001445_01 | At1g09340 | putative RNA-binding protein; protein id: At1g09340       | -0.063 | -0.006 | 0.051  | 0.665  |
| A001446_01 | At1g79690 | expressed protein; protein id: At1g79690.1                | 0.438  | 0.175  | 0.423  | 0.943  |
| A001448_01 | At1g30630 | coatomer-like protein, epsilon subunit; protein id: At    | 0.532  | 0.231  | 0.537  | 0.845  |
| A001449_01 | At5g33315 | similar to GB:AAC24836 pol polyprotein (Ty1_Copic         | 0.265  | NA     | NA     | 0.45   |
| A001451_01 | At1g21400 | branched-chain alpha keto-acid dehydrogenase, pu          | -2.388 | -2.355 | -1.174 | -1.342 |
| A001452_01 | At1g47740 | expressed protein; protein id: At1g47740.1                | 0.452  | 0.476  | 0.345  | 0.516  |
| A001455_01 | At1g25260 | expressed protein; protein id: At1g25260.1                | 0.507  | 0.524  | 0.646  | 0.808  |
| A001457_01 | At1g19880 | unknown protein; protein id: At1g19880.1                  | -0.091 | -0.163 | -0.203 | -0.092 |
| A001458_01 | At4g20720 | expressed protein; protein id: At4g20720.1                | -0.067 | -0.223 | -0.446 | -0.071 |
| A001460_01 | At1g73490 | unknown protein; protein id: At1g73490.1                  | 0.043  | 0.229  | 0.438  | 0.307  |
| A001461_01 | At1g63980 | expressed protein; protein id: At1g63980.1                | 0.244  | -0.092 | -0.425 | 0.27   |
| A001465_01 | At1g12840 | vacuolar ATP synthase subunit C, putative; protein        | 0.277  | 0.189  | 0.089  | 0.167  |
| A001468_01 | At1g53910 | AP2 domain protein RAP2.12; protein id: At1g53910         | -0.585 | -0.475 | -0.092 | 0.028  |
| A001471_01 | At1g66430 | fructokinase, putative; protein id: At1g66430.1           | 1.52   | 1.551  | 1.227  | 1.725  |
| A001472_01 | At1g26920 | expressed protein; protein id: At1g26920.1                | -1.649 | -1.478 | -1.092 | -1.755 |
| A001474_01 | At1g42990 | bZIP family transcription factor; protein id: At1g4299    | -1.117 | NA     | -0.26  | 0.068  |
| A001477_01 | At1g14380 | expressed protein; protein id: At1g14380.1                | -0.785 | -0.839 | NA     | -0.713 |
| A001480_01 | At1g35580 | invertase, putative; protein id: At1g35580.1              | -0.166 | NA     | NA     | 0.492  |
| A001481_01 | At1g19740 | unknown protein; protein id: At1g19740.1                  | -0.953 | -0.49  | -0.424 | -1.019 |
| A001487_01 | At1g09270 | putative importin alpha; protein id: At1g09270.1          | 0.118  | 0.011  | -0.323 | -0.05  |
| A001488_01 | At1g62750 | elongation factor Tu family protein; protein id: At1g6    | 0.1    | -0.333 | -0.757 | -0.407 |
| A001490_01 | At1g19870 | hypothetical protein; protein id: At1g19870.1             | 0.094  | -0.092 | -0.429 | -0.142 |
| A001495_01 | At1g52890 | NAM-like protein; protein id: At1g52890.1                 | -1.704 | -1.452 | -0.922 | -1.108 |
| A001496_01 | At1g15260 | expressed protein; protein id: At1g15260.1                | 0.246  | 0.424  | NA     | 0.332  |
| A001507_01 | At1g52220 | expressed protein; protein id: At1g52220.1                | 0.237  | -0.005 | -0.157 | 0.048  |
| A001511_01 | At1g32120 | hypothetical protein; protein id: At1g32120.1             | -0.526 | -0.296 | -0.807 | -0.396 |
| A001513_01 | At1g09620 | putative leucyl-tRNA synthetase; protein id: At1g096      | 0.184  | 0.189  | -0.066 | -0.141 |
| A001516_01 | At1g77370 | glutaredoxin, putative; protein id: At1g77370.1           | -0.805 | NA     | -0.019 | -0.645 |
| A001518_01 | At1g09750 | expressed protein; protein id: At1g09750.1                | 1.789  | 1.533  | 1.233  | 1.55   |
| A001529_01 | At1g08750 | putative GPI-anchor transamidase (U32517); protei         | -0.047 | NA     | -0.631 | 0.323  |
| A001536_01 | At1g01960 | hypothetical protein; protein id: At1g01960.1             | 0.15   | 0.209  | -0.033 | -0.03  |
| A001537_01 | At1g10840 | putative translation initiation factor; protein id: At1g1 | -0.344 | NA     | -0.131 | 0.348  |
| A001553_01 | At1g30580 | putative GTP-binding protein; protein id: At1g30580       | 0.199  | 0.052  | 0.027  | 0.382  |
| A001558_01 | At1g65290 | acyl carrier protein, putative; protein id: At1g65290.    | 0.871  | 0.609  | 0.397  | 0.471  |
| A001559_01 | At1g65295 | expressed protein; protein id: At1g65295.1                | 0.17   | NA     | 0.199  | 0.015  |
| A001566_01 | At1g29900 | carbamoylphosphate synthetase, putative; protein id       | 0.561  | 0.8    | 0.557  | 1.076  |
| A001567_01 | At1g07040 | expressed protein; protein id: At1g07040.1                | -1.739 | -1.956 | -1.354 | -1.875 |
| A001568_01 | At1g09100 | 26S protease regulatory subunit 6A; protein id: At1g      | -0.101 | NA     | NA     | 0.368  |
| A001573_01 | At1g01290 | molybdopterin biosynthesis CNX3 protein, putative;        | -0.175 | -0.114 | 0.175  | 0.589  |
| A001578_01 | At1g51060 | histone H2A, putative; protein id: At1g51060.1            | 0.828  | 1.013  | 0.872  | 0.561  |
| A001586_01 | At1g35170 | hypothetical protein; protein id: At1g35170.1             | 0.494  | 0.732  | NA     | 1.023  |
| A001593_01 | At1g61100 | disease resistance protein (TIR class), putative; pro     | -0.206 | 0.227  | -0.599 | -0.246 |
| A001595_01 | At1g26280 | hypothetical protein; protein id: At1g26280.1             | -0.367 | -0.076 | -0.128 | -0.089 |
| A001601_01 | At1g31810 | unknown protein; protein id: At1g31810.1                  | 0.215  | NA     | NA     | 0.469  |
| A001602_01 | At1g04590 | expressed protein; protein id: At1g04590.1                | 0.856  | 0.891  | 0.516  | 0.696  |
| A001604_01 | At1g31910 | unknown protein; protein id: At1g31910.1                  | -0.164 | -0.221 | -0.174 | -0.003 |
| A001605_01 | At1g04550 | putative auxin-induced protein, IAA12; protein id: At     | -0.014 | 0.02   | 0.055  | 0.118  |
| A001606_01 | At1g04530 | expressed protein; protein id: At1g04530.1                | -0.272 | -0.447 | -0.349 | -0.133 |
| A001609_01 | At1g32070 | expressed protein; protein id: At1g32070.1                | -0.344 | -0.274 | -0.345 | -0.524 |

|            |           |                                                           |           |           |          |        |
|------------|-----------|-----------------------------------------------------------|-----------|-----------|----------|--------|
| A001610_01 | At1g25440 | CONSTANS B-box zinc finger family protein; protein        | -0.924    | -1.161    | -0.921   | -0.999 |
| A001611_01 | At1g25540 | hypothetical protein; protein id: At1g25540.1             | -0.238 NA | NA        | NA       |        |
| A001612_01 | At1g25530 | lysine and histidine specific transporter, putative; pr   | -0.922    | -0.628    | -0.61    | -0.276 |
| A001613_01 | At1g43130 | expressed protein; protein id: At1g43130.1                | -0.124    | -0.211    | -0.172   | -0.303 |
| A001619_01 | At1g24160 | unknown protein; protein id: At1g24160.1                  | -0.644    | -0.608    | -0.192   | 0.007  |
| A001621_01 | At1g56310 | 3'-5' exonuclease, putative; protein id: At1g56310.1      | -0.152 NA | NA        |          | 0.549  |
| A001624_01 | At1g50950 | hypothetical protein; protein id: At1g50950.1             | -0.253 NA | NA        | NA       |        |
| A001631_01 | At1g35910 | trehalose-phosphatase, putative; protein id: At1g359      | -1.204    | -1.211    | -0.217   | -0.208 |
| A001645_01 | At1g33410 | unknown protein; protein id: At1g33410.1                  | 0.81      | 0.672     | 0.525    | 0.884  |
| A001651_01 | At1g33265 | expressed protein; protein id: At1g33265.1                | 0.861     | 0.915     | 0.421    | 0.616  |
| A001652_01 | At1g66070 | expressed protein; protein id: At1g66070.1                | 0.171 NA  | NA        |          | 0.166  |
| A001663_01 | At1g11960 | unknown protein; protein id: At1g11960.1                  | -0.831 NA | NA        |          | -0.009 |
| A001664_01 | At1g28110 | serine carboxypeptidase II, putative; protein id: At1g    | 0.613     | 0.856     | 0.422    | 0.848  |
| A001670_01 | At1g27960 | unknown protein; protein id: At1g27960.1                  | 0.396     | 0.536 NA  |          | 0.959  |
| A001671_01 | At1g27980 | sphingosine-1-phosphate lyase, putative; protein id:      | -2.323    | -2.238    | -1.517   | -1.391 |
| A001675_01 | At1g52340 | short chain alcohol dehydrogenase, putative; protein      | -0.01     | 0.117     | 0.124    | 0.331  |
| A001677_01 | At1g55300 | serine/arginine-rich protein, putative; protein id: At1g  | -0.041 NA | NA        |          | 0.248  |
| A001678_01 | At1g55190 | expressed protein; protein id: At1g55190.1                | -0.305 NA |           | 0.271 NA |        |
| A001679_01 | At1g55330 | arabinogalactan-protein (AGP21); protein id: At1g553      |           | 0.916     | 0.868    | 0.814  |
| A001681_01 | At1g68920 | putative DNA-binding protein; protein id: At1g68920       | -0.344    | -0.438 NA |          | -0.178 |
| A001683_01 | At1g48380 | A.t. chromosome 1 BAC F508 sequence, root hair            | 0.147 NA  | NA        |          | 0.464  |
| A001693_01 | At1g61010 | putative cleavage and polyadenylation specificity fac     | 0.351     | 0.545     | -0.095   | 0.188  |
| A001695_01 | At1g77480 | nucellin-like protein; protein id: At1g77480.1            | -0.453 NA |           | -0.931   | -0.073 |
| A001696_01 | At1g77540 | expressed protein; protein id: At1g77540.1                | -0.06     | 0.438     | 0.173    | -0.379 |
| A001697_01 | At1g77450 | GRAB1-like protein; protein id: At1g77450.1               | -2.341    | -1.971    | -0.908   | -1.41  |
| A001711_01 | At1g77440 | 20S proteasome beta subunit C (PBC2); protein id:         | 0.648     | 0.774     | 0.379    | 0.69   |
| A001717_01 | At1g77290 | tetrachloro-p-hydroquinone reductive dehalogenase         | -0.473    | -0.295    | 0.053    | 0.084  |
| A001719_01 | At1g72170 | unknown protein; protein id: At1g72170.1                  | 0.486     | 0.722     | 0.428    | 0.209  |
| A001720_01 | At1g72290 | drought induced protein, putative; protein id: At1g72     | 2.145     | 1.572     | 1.701    | 2.209  |
| A001728_01 | At1g73730 | ethylene-insensitive3-like3 (EIL3); protein id: At1g73    | -0.07     | 0.152 NA  |          | -0.261 |
| A001736_01 | At1g53670 | putative membrane channel protein; protein id: At2g       | -0.708    | -0.691    | -0.374   | -1.004 |
| A001740_01 | At1g73655 | peptidylprolyl isomerase, putative; protein id: At1g7     | -0.086    | 0.107     | -0.442   | -0.518 |
| A001745_01 | At1g78210 | hypothetical protein; protein id: At1g78210.1             | 1.167     | 1.075     | 0.946    | 1.442  |
| A001748_01 | At1g03280 | expressed protein; protein id: At1g03280.1                | 0.319     | 0.339 NA  |          | 0.739  |
| A001750_01 | At1g36380 | expressed protein; protein id: At1g36380.1                | 0.004     | 0.204     | 0.218    | -0.13  |
| A001756_01 | At1g78810 | hypothetical protein; protein id: At1g78810.1             | 0.029     | 0.185 NA  |          | 0.321  |
| A001757_01 | At1g71950 | expressed protein; protein id: At1g71950.1                | -0.366    | -0.294    | 0.061    | -0.209 |
| A001758_01 | At1g53000 | CMP-KDO synthetase, putative; protein id: At1g530         | 0.752     | 0.803 NA  |          | 0.843  |
| A001760_01 | At1g52930 | expressed protein; protein id: At1g52930.1                | 1.003     | 0.923     | 0.82     | 1.508  |
| A001770_01 | At1g08810 | myb family transcription factor; protein id: At1g0881     | -0.709 NA | NA        |          | -0.831 |
| A001773_01 | At1g70530 | putative protein kinase; protein id: At1g70530.1          | -1.331    | -1.579    | -1.265   | -1.712 |
| A001779_01 | At1g73940 | expressed protein; protein id: At1g73940.1                | 1.11      | 0.99      | 0.858    | 1.188  |
| A001783_01 | At1g74070 | expressed protein; protein id: At1g74070.1                | 0.067 NA  |           | 0.096    | -0.113 |
| A001785_01 | At1g73860 | kinesin-related protein; protein id: At1g73860.1          | -0.931 NA | NA        | NA       |        |
| A001789_01 | At1g77320 | hypothetical protein; protein id: At1g77320.1             | -1.439    | -0.946 NA |          | -0.263 |
| A001790_01 | At1g64970 | gamma-tocopherol methyltransferase; protein id: At        | -1.589    | -1.14     | -0.473   | -0.264 |
| A001791_01 | At1g69800 | expressed protein; protein id: At1g69800.1                | -0.269 NA |           | -0.006   | 0.372  |
| A001800_01 | At1g03890 | putative cruciferin 12S seed storage protein; protein NA  | NA        | NA        | NA       | NA     |
| A001801_01 | At1g68190 | CONSTANS B-box zinc finger family protein; protein        | -0.692    | -0.751    | -0.947   | -1.224 |
| A001803_01 | At1g68160 | expressed protein; protein id: At1g68160.1                | 0.263     | 0.466     | 0.074    | 0.185  |
| A001804_01 | At1g51510 | RNA-binding protein, putative; protein id: At1g51510      | 0.33      | 0.359     | 0.343    | 0.128  |
| A001807_01 | At1g51560 | unknown protein; protein id: At1g51560.1                  | -0.233 NA | NA        |          | 0.265  |
| A001819_01 | At1g26940 | expressed protein; protein id: At1g26940.1                | 0.655     | 1.182 NA  |          | 0.637  |
| A001826_01 | At1g17130 | unknown protein; protein id: At1g17130.1                  | 0.296     | -0.118    | 0.211    | 0.328  |
| A001827_01 | At1g17050 | geranyl diphosphate synthase (GPPS)(dimethylallyl         | -1.131 NA | NA        |          | -0.932 |
| A001833_01 | At1g04340 | unknown protein; protein id: At1g04340.1                  | -0.05     | 0.474     | 0.282    | 0.12   |
| A001838_01 | At1g04950 | TATA binding protein-associated factor, putative; pr      | 0.277     | 0.259     | -0.221   | 0.013  |
| A001842_01 | At1g26665 | expressed protein; protein id: At1g26665.1                | -0.385    | -0.136    | 0.264    | 0.342  |
| A001843_01 | At1g03475 | putative coproporphyrinogen III oxidase; protein id:      | 0.958     | 0.802     | 0.58     | 0.643  |
| A001848_01 | At1g55520 | transcription initiation factor TFIID-2; protein id: At1g | -0.173    | -0.049    | 0.125    | 0.422  |
| A001861_01 | At1g78510 | geranyl diphosphate synthase (GPPS)(dimethylallyl         | -1.427    | -1.479    | -0.903   | -0.829 |
| A001864_01 | At1g49380 | expressed protein; protein id: At1g49380.1                | 0.062     | -0.027    | -0.863   | -0.82  |
| A001865_01 | At1g54110 | expressed protein; protein id: At1g54110.1                | -0.263 NA | NA        | NA       |        |
| A001867_01 | At1g49360 | hypothetical protein; protein id: At1g49360.1             | -0.409    | -0.446 NA | NA       |        |
| A001868_01 | At1g54140 | transcriptional activation factor TAFII32, putative; pr   | 0.213     | 0.45 NA   |          | 0.458  |
| A001869_01 | At1g54160 | CCAAT-binding factor B subunit, putative; protein id      | -0.162    | -0.531    | -0.436   | -0.141 |
| A001870_01 | At1g73180 | expressed protein; protein id: At1g73180.1                | 0.34      | 0.437 NA  |          | 0.824  |
| A001874_01 | At1g72680 | putative cinnamyl-alcohol dehydrogenase; protein ic       | -0.995 NA |           | -0.715   | -0.712 |



|            |           |                                                         |        |        |        |        |
|------------|-----------|---------------------------------------------------------|--------|--------|--------|--------|
| A001880_01 | At1g76600 | expressed protein; protein id: At1g76600.1              | NA     | NA     | -1.137 | -1.446 |
| A001883_01 | At1g51730 | unknown protein; protein id: At1g51730.1                | 0.297  | 0.34   | 0.193  | 0.449  |
| A001884_01 | At1g11760 | hypothetical protein; protein id: At1g11760.1           | -0.406 | NA     | 0.152  | 0.324  |
| A001886_01 | At1g11720 | putative glycogen synthase; protein id: At1g11720.1     | 0.014  | 0.099  | -0.177 | 0.246  |
| A001889_01 | At1g11660 | putative heat-shock protein; protein id: At1g11660.1    | 0.663  | 0.534  | -0.22  | NA     |
| A001894_01 | At1g20960 | U5 small nuclear ribonucleoprotein helicase, putativ    | 0.061  | -0.044 | NA     | 0.333  |
| A001898_01 | At1g63690 | expressed protein; protein id: At1g63690.1              | -0.245 | -0.11  | -0.249 | -0.386 |
| A001901_01 | At1g05720 | expressed protein; protein id: At1g05720.1              | 0.502  | 0.344  | 0.431  | -0.005 |
| A001903_01 | At1g26770 | expansin, putative; protein id: At1g26770.1             | 0.129  | 0.102  | 0.199  | -0.362 |
| A001904_01 | At1g51160 | unknown protein; protein id: At1g51160.1                | 0.706  | 0.517  | 0.733  | 0.79   |
| A001912_01 | At1g79510 | expressed protein; protein id: At1g79510.1              | NA     | NA     | NA     | NA     |
| A001913_01 | At1g55020 | lipoygenase, putative; protein id: At1g55020.1          | 0.253  | -0.183 | -0.342 | -0.398 |
| A001915_01 | At1g26630 | initiation factor 5A-4, putative; protein id: At1g26630 | 0.215  | -0.062 | 0.268  | 0.331  |
| A001917_01 | At1g71697 | choline kinase, putative; protein id: At1g71697.1       | -1.275 | -1.325 | -1.283 | -0.783 |
| A001918_01 | At1g51720 | NADP-specific glutamate dehydrogenase, putative         | -0.325 | -0.331 | -0.547 | -0.262 |
| A001920_01 | At1g70330 | expressed protein; protein id: At1g70330.1              | -0.094 | -0.081 | -0.038 | 0.028  |
| A001924_01 | At1g09230 | unknown protein; protein id: At1g09230.1                | -0.199 | -0.099 | NA     | -0.439 |
| A001929_01 | At1g20980 | putative SPL1-related protein; protein id: At1g20980    | -0.087 | NA     | -0.224 | -0.286 |
| A001932_01 | At1g25500 | unknown protein; protein id: At1g25500.1                | -0.5   | NA     | NA     | NA     |
| A001934_01 | At1g17745 | genomic sequence for A.t. BAC F22G5 from chrom          | 0.193  | -0.093 | 0.346  | 0.731  |
| A001936_01 | At1g20850 | cysteine proteinase XCP2; protein id: At1g20850.1       | 0.698  | 0.646  | 0.462  | 0.868  |
| A001937_01 | At1g22160 | expressed protein; protein id: At1g22160.1              | 0.379  | 0.154  | 0.791  | 0.7    |
| A001939_01 | At1g10370 | glutathione transferase, putative; protein id: At1g103  | 0.739  | 0.895  | 0.609  | 0.727  |
| A001945_01 | At1g67300 | integral membrane protein, putative; protein id: At1g6  | -0.147 | -0.309 | -0.269 | 0.118  |
| A001946_01 | At1g50480 | growth regulator, putative; protein id: At1g35510.1     | -0.967 | -1.012 | -0.867 | -0.457 |
| A001952_01 | At1g04850 | expressed protein; protein id: At1g04850.1              | 0.162  | 0.024  | -0.028 | -0.049 |
| A001957_01 | At1g27770 | calcium-transporting ATPase 1, plasma membrane-         | -0.385 | NA     | -0.791 | -0.93  |
| A001958_01 | At1g20780 | expressed protein; protein id: At1g20780.1              | -0.38  | NA     | NA     | -0.84  |
| A001959_01 | At1g04400 | putative cryptochrome 2 apoprotein; protein id: At1g    | -0.798 | -1.029 | -0.551 | -0.477 |
| A001961_01 | At1g28380 | expressed protein; protein id: At1g28380.1              | -0.925 | NA     | NA     | NA     |
| A001962_01 | At1g79975 | expressed protein; protein id: At1g79975.1              | -0.401 | -0.125 | -0.1   | -0.153 |
| A001963_01 | At1g08770 | expressed protein; protein id: At1g08770.1              | -0.426 | -0.207 | -0.021 | -0.159 |
| A001964_01 | At1g54990 | expressed protein; protein id: At1g54990.1              | 0.663  | 0.783  | 0.256  | 0.637  |
| A001966_01 | At1g14000 | putative protein kinase; protein id: At1g14000.1        | -0.313 | -0.645 | -0.211 | 0.03   |
| A001967_01 | At1g49430 | acyl CoA synthetase, putative; protein id: At1g49430    | 0.684  | 0.661  | 0.597  | 1.093  |
| A001970_01 | At1g06570 | 4-hydroxyphenylpyruvate dioxygenase (HPD); prote        | -2.333 | -2.189 | -1.299 | -1.867 |
| A001974_01 | At1g63900 | putative RING zinc finger protein; protein id: At1g63   | -0.388 | -0.263 | NA     | -0.21  |
| A001975_01 | At1g64550 | ABC transporter family protein; protein id: At1g6455    | 0.333  | 0.26   | NA     | 0.302  |
| A001979_01 | At1g16240 | expressed protein; protein id: At1g16240.1              | -0.807 | -0.516 | -0.39  | -0.121 |
| A001980_01 | At1g68570 | peptide transporter, putative; protein id: At1g68570.   | -1.765 | -1.175 | -0.207 | -0.755 |
| A001984_01 | At1g04170 | translation initiation factor eIF-2 gamma subunit, pu   | 0.481  | NA     | 0.527  | 0.707  |
| A001986_01 | At1g07080 | expressed protein; protein id: At1g07080.1              | -0.672 | -0.691 | -0.454 | -0.56  |
| A001988_01 | At1g27950 | lipid transfer protein, putative; protein id: At1g27950 | 0.61   | 0.834  | 0.657  | 0.534  |
| A001990_01 | At1g15110 | putative phosphatidylserine synthase; protein id: At    | -0.657 | NA     | NA     | NA     |
| A001996_01 | At1g07790 | histone H2B; protein id: At1g07790.1                    | 1.061  | 0.887  | 0.676  | 0.478  |
| A001997_01 | At1g01120 | fatty acid elongase 3-ketoacyl-CoA synthase 1; prot     | -0.532 | NA     | -0.299 | -0.718 |
| A002002_01 | At1g76490 | 3-hydroxy-3-methylglutaryl CoA reductase (AA 1-59       | -0.385 | -0.352 | -0.074 | -0.079 |
| A002003_01 | At1g21610 | unknown protein; protein id: At1g21610.1                | -0.272 | NA     | NA     | -0.915 |
| A002008_01 | At1g47960 | expressed protein; protein id: At1g47960.1              | -2.915 | -2.538 | -1.418 | -1.678 |
| A002009_01 | At1g28140 | expressed protein; protein id: At1g28140.1              | -1.012 | -0.584 | -0.785 | -0.807 |
| A002011_01 | At1g20440 | hypothetical protein; protein id: At1g20440.1           | -0.655 | -1.145 | -0.489 | -1.214 |
| A002013_01 | At1g10470 | putative response regulator 3; protein id: At1g10470    | -1.206 | -0.801 | -0.601 | -1.201 |
| A002014_01 | At1g15950 | cinnamoyl CoA reductase, putative; protein id: At1g     | -1.125 | -1.172 | -0.24  | -0.336 |
| A002016_01 | At1g54080 | oligouridylate binding protein (UBP1), putative; prote  | -0.111 | NA     | NA     | -0.496 |
| A002017_01 | At1g21820 | unknown protein; protein id: At1g21820.1                | -0.309 | -0.085 | 0.195  | -0.015 |
| A002023_01 | At1g54780 | thylakoid lumen 18.3 kDa protein; protein id: At1g54    | -0.192 | -0.489 | -0.615 | -0.57  |
| A002026_01 | At1g31812 | Acyl CoA binding protein, putative; protein id: At1g3   | -0.244 | -0.11  | 0.184  | -0.034 |
| A002031_01 | At1g30820 | CTP synthase-like protein; protein id: At1g30820.1      | -1.161 | -1.062 | -0.498 | -1.063 |
| A002032_01 | At1g04960 | expressed protein; protein id: At1g04960.1              | -0.794 | -0.932 | -0.547 | -0.394 |
| A002033_01 | At1g10940 | Ser/Thr kinase; protein id: At1g10940.1                 | -0.445 | -0.335 | -0.24  | -0.249 |
| A002035_01 | At1g49970 | ATP-dependent Clp protease proteolytic subunit (Cl      | -0.769 | -0.925 | -0.656 | -0.22  |
| A002037_01 | At1g74320 | putative choline kinase; protein id: At1g74320.1        | -0.24  | -0.21  | NA     | 0.223  |
| A002038_01 | At1g74740 | calcium-dependent protein kinase, putative; protein     | -0.95  | NA     | NA     | -0.47  |
| A002045_01 | At1g74670 | GAST1-like protein; protein id: At1g74670.1             | -2.21  | NA     | -0.529 | -1.481 |
| A002050_01 | At1g07200 | unknown protein; protein id: At1g07200.1                | -0.85  | -0.945 | NA     | -1.023 |
| A002052_01 | At1g20340 | plastocyanin; protein id: At1g20340.1                   | 0.101  | -0.171 | -0.107 | -0.523 |
| A002054_01 | At1g22750 | expressed protein; protein id: At1g22750.1              | -0.994 | -0.931 | -0.564 | -1.037 |
| A002059_01 | At1g62390 | expressed protein; protein id: At1g62390.1              | 0.758  | 0.505  | -0.61  | 0.043  |

|            |           |                                                                                |        |    |        |        |        |
|------------|-----------|--------------------------------------------------------------------------------|--------|----|--------|--------|--------|
| A002061_01 | At1g21760 | F-box protein family; protein id: At1g21760.1                                  | -0.981 | NA |        | -0.441 | -0.333 |
| A002062_01 | At1g69830 | putative alpha-amylase; protein id: At1g69830.1                                | 1.408  |    | 1.346  | 0.018  | 0.695  |
| A002065_01 | At1g72030 | unknown protein; protein id: At1g72030.1                                       | -1.206 |    | -0.621 | NA     | -0.554 |
| A002066_01 | At1g74920 | betaine aldehyde dehydrogenase, putative; protein id: At1g74920.1              | 0.338  |    | 0.051  | -0.151 | 0.052  |
| A002067_01 | At1g56560 | alkaline/neutral invertase, putative; protein id: At1g56560.1                  | -0.792 |    | -0.622 | NA     | -0.568 |
| A002068_01 | At1g74880 | expressed protein; protein id: At1g74880.1                                     | -0.396 |    | -0.319 | -0.495 | -0.717 |
| A002070_01 | At1g02500 | S-adenosylmethionine synthetase; protein id: At1g02500.1                       | -0.604 |    | -0.96  | -0.75  | -1.121 |
| A002073_01 | At1g47128 | cysteine proteinase RD21A; protein id: At1g47128.1                             | -2.049 |    | -2.224 | -1.072 | -1.074 |
| A002075_01 | At1g67740 | F12A21.13; protein id: At1g67740.1                                             | -0.451 |    | -0.535 | -0.244 | -0.651 |
| A002076_01 | At1g01790 | K Efflux antiporter KEA1; protein id: At1g01790.1                              | 0.206  |    | 0.054  | -0.222 | -0.378 |
| A002079_01 | At1g77670 | putative aminotransferase; protein id: At1g77670.1                             | 0.829  |    | 0.78   | 0.668  | 0.759  |
| A002080_01 | At1g41880 | ribosomal protein; protein id: At1g41880.1                                     | 1.056  |    | 0.983  | 1.104  | 1.089  |
| A002081_01 | At1g65960 | glutamate decarboxylase 2 (GAD 2); protein id: At1g65960.1                     | 0.681  |    | 0.326  | 0.787  | 0.962  |
| A002082_01 | At1g72450 | expressed protein; protein id: At1g72450.1                                     |        | NA | -0.174 | -0.464 | -0.469 |
| A002083_01 | At1g60200 | RRM-containing protein; protein id: At1g60200.1                                | 0.103  |    | -0.505 | NA     | -0.435 |
| A002085_01 | At1g31130 | expressed protein; protein id: At1g31130.1                                     | -0.122 |    | -0.12  | -0.314 | -0.339 |
| A002086_01 | At1g69620 | 60S ribosomal protein L34, putative; protein id: At1g69620.1                   | 1.004  |    | 1.044  | 0.877  | 0.19   |
| A002087_01 | At1g70890 | major latex protein (MLP)-related; protein id: At1g70890.1                     | 0.086  |    | 0.664  | 0.629  | 0.959  |
| A002088_01 | At1g25550 | expressed protein; protein id: At1g25550.1                                     | -1.403 | NA |        | NA     | NA     |
| A002089_01 | At1g80930 | unknown protein; protein id: At1g80930.1                                       | 0.113  | NA |        | NA     | 0.189  |
| A002090_01 | At1g74730 | expressed protein; protein id: At1g74730.1                                     | 0.322  |    | 0.273  | 0.136  | -0.088 |
| A002092_01 | At1g04000 | expressed protein; protein id: At1g04000.1                                     | -0.708 | NA |        | -0.084 | -0.28  |
| A002094_01 | At1g74560 | putative SET protein, phosphatase 2A inhibitor; protein id: At1g74560.1        | 1.054  |    | 0.905  | 1.071  | 1.184  |
| A002096_01 | At1g74470 | geranylgeranyl reductase; protein id: At1g74470.1                              | -0.418 |    | -0.511 | -0.694 | -0.476 |
| A002102_01 | At1g02640 | glycosyl hydrolase family 3; protein id: At1g02640.1                           | -0.694 |    | -0.534 | -1.211 | -1.678 |
| A002103_01 | At1g30360 | expressed protein; protein id: At1g30360.1                                     | -0.755 |    | -0.68  | -0.333 | -1.026 |
| A002116_01 | At1g75840 | GTP binding protein (ARAC5); protein id: At1g75840.1                           | 0.675  |    | 0.43   | 0.381  | 0.648  |
| A002117_01 | At1g79350 | hypothetical protein; protein id: At1g79350.1                                  | 0.224  | NA |        | NA     | -0.202 |
| A002118_01 | At1g78080 | AP2 domain protein RAP2.4; protein id: At1g78080.1                             | -1.635 |    | -1.321 | -1.191 | -1.13  |
| A002120_01 | At1g48300 | hypothetical protein; protein id: At1g48300.1                                  | -1.423 |    | -1.637 | -1.199 | -1.72  |
| A002126_01 | At1g02850 | glycosyl hydrolase family 1; protein id: At1g02850.1                           | -1.187 | NA |        | NA     | -0.809 |
| A002130_01 | At1g20670 | hypothetical protein; protein id: At1g20670.1                                  | -0.419 |    | -0.477 | NA     | -0.948 |
| A002138_01 | At1g18890 | calcium-dependent protein kinase, putative; protein id: At1g18890.1            | -0.585 |    | -0.226 | -0.137 | 0.505  |
| A002142_01 | At1g56450 | 20S proteasome beta subunit G1 (PBG1); protein id: At1g56450.1                 | 0.584  |    | 0.757  | 0.736  | 0.777  |
| A002146_01 | At1g24360 | putative 3-oxoacyl (acyl-carrier protein) reductase; protein id: At1g24360.1   | 0.725  |    | 0.647  | 0.523  | 0.736  |
| A002147_01 | At1g59650 | expressed protein; protein id: At1g59650.1                                     | -0.143 |    | -0.498 | -0.174 | 0.134  |
| A002148_01 | At1g55120 | glycosyl hydrolase family 32; protein id: At1g55120.1                          | 0.342  |    | 0.129  | 0.064  | 0.326  |
| A002149_01 | At1g04580 | putative aldehyde oxidase; protein id: At1g04580.1                             | -3.019 | NA |        | NA     | NA     |
| A002160_01 | At1g72830 | CCAAT-binding factor B subunit homolog, putative; protein id: At1g72830.1      | -1.184 |    | -1.132 | NA     | -0.617 |
| A002165_01 | At1g54340 | NADP-isocitrate dehydrogenase, putative; protein id: At1g54340.1               | -0.503 |    | -0.334 | -0.083 | 0.161  |
| A002171_01 | At1g28410 | hypothetical protein; protein id: At1g28410.1                                  | 0.566  |    | 0.775  | NA     | 0.5    |
| A002175_01 | At1g28510 | expressed protein; protein id: At1g28510.1                                     | 0.425  |    | 0.23   | 0.184  | -0.094 |
| A002176_01 | At1g15920 | BTG1 binding factor 1, putative; protein id: At1g15920.1                       | -0.279 |    | -0.31  | -0.294 | -0.296 |
| A002178_01 | At1g16040 | unknown protein; protein id: At1g16040.1                                       | -0.399 | NA |        | NA     | -0.272 |
| A002180_01 | At1g30450 | cation-chloride co-transporter, putative; protein id: At1g30450.1              | 0.475  | NA |        | NA     | 0.184  |
| A002183_01 | At1g74430 | myb family transcription factor; protein id: At1g74430.1                       | 1.384  |    | 1.26   | 0.923  | 1.258  |
| A002184_01 | At1g18880 | peptide transporter, putative; protein id: At1g18880.1                         | -1.92  |    | -1.845 | NA     | NA     |
| A002198_01 | At1g14290 | acid phosphatase, putative; protein id: At1g14290.1                            | 0.349  | NA |        | NA     | 0.647  |
| A002199_01 | At1g14300 | hypothetical protein; protein id: At1g14300.1                                  | 0.457  | NA |        |        | 0.669  |
| A002206_01 | At1g14510 | nucleic acid binding protein (alfin-1), putative; protein id: At1g14510.1      | 0.195  |    | 0.17   | 0.304  | 0.326  |
| A002210_01 | At1g43670 | fructose 1,6-bisphosphatase, putative; protein id: At1g43670.1                 | -0.897 |    | -0.926 | -1.184 | -1.377 |
| A002214_01 | At1g16460 | mercaptopyruvate sulfurtransferase (Mst2/Rdh2); protein id: At1g16460.1        | -0.391 |    | -0.516 | -0.358 | -0.087 |
| A002218_01 | At1g79700 | ovule development protein, putative; protein id: At1g79700.1                   |        | NA |        | -0.607 | -1.303 |
| A002220_01 | At1g62370 | hypothetical protein; protein id: At1g62370.1                                  | -2.072 |    | -1.712 | -0.795 | -1.695 |
| A002224_01 | At1g78460 | hypothetical protein; protein id: At1g78460.1                                  | -1.176 |    | -0.449 | NA     | NA     |
| A002230_01 | At1g07870 | protein kinase, putative (fragment); protein id: At1g07870.1                   | -0.505 |    | -0.204 | -0.171 | -0.064 |
| A002232_01 | At1g07720 | fatty acid elongase 3-ketoacyl-CoA synthase, putative; protein id: At1g07720.1 | -1.708 |    | -1.772 | NA     | NA     |
| A002235_01 | At1g62990 | homeodomain-containing protein HD1, putative; protein id: At1g62990.1          | -1.201 | NA |        | NA     | NA     |
| A002237_01 | At1g62880 | unknown protein; protein id: At1g62880.1                                       | -0.237 |    | -0.016 | 0.044  | 0.142  |
| A002243_01 | At1g01800 | carbonyl reductase, putative; protein id: At1g01800.1                          | -0.067 | NA |        | -0.017 | -0.174 |
| A002244_01 | At1g53560 | expressed protein; protein id: At1g53560.1                                     | -1.931 |    | -1.779 | -1.18  | -2.148 |
| A002246_01 | At1g12830 | peroxisomal targeting signal type 2 receptor; protein id: At1g12830.1          | 0.454  |    | 0.382  | 0.594  | 0.508  |
| A002258_01 | At1g14890 | expressed protein; protein id: At1g14890.1                                     | -1.098 |    | -0.595 | -0.361 | -0.79  |
| A002259_01 | At1g14920 | GAI; protein id: At1g14920.1                                                   | 0.169  |    | 0.515  | 0.615  | 1.115  |
| A002260_01 | At1g14790 | RNA-dependent RNA polymerase, putative; protein id: At1g14790.1                | -0.562 |    | -0.38  | -0.872 | -0.792 |
| A002266_01 | At1g19110 | unknown protein; protein id: At1g19110.1                                       | -0.039 |    | -0.172 | -0.851 | -0.435 |
| A002267_01 | At1g55910 | expressed protein; protein id: At1g55910.1                                     | -0.904 | NA |        | -0.492 | -0.487 |
| A002272_01 | At1g55830 | hypothetical protein; protein id: At1g55830.1                                  | -0.221 |    | -0.145 | NA     | NA     |

|            |           |                                                                                       |        |    |        |        |        |
|------------|-----------|---------------------------------------------------------------------------------------|--------|----|--------|--------|--------|
| A002283_01 | At1g17590 | transcription factor, putative; protein id: At1g17590.1                               | -0.421 | NA | NA     |        | 0.141  |
| A002284_01 | At1g17520 | myb-related DNA-binding protein, putative; protein id: At1g17520.1                    | -0.617 | NA |        | -0.267 | -0.24  |
| A002285_01 | At1g17510 | expressed protein; protein id: At1g17510.1                                            | 0.325  |    | 0.472  | 0.586  | 0.607  |
| A002294_01 | At1g20470 | hypothetical protein; protein id: At1g20470.1                                         | -1.36  |    | -1.111 | NA     | NA     |
| A002308_01 | xxxx      | b/t At1g48600.1 phosphoethanolamine N-methyltransferase                               | -0.457 |    | -0.365 | NA     | NA     |
| A002329_01 | At1g20200 | 26S proteasome regulatory subunit S3 (RPN3), putative; protein id: At1g20200.1        | 0.332  |    | 0.348  | 0.244  | 0.426  |
| A002330_01 | At1g20100 | expressed protein; protein id: At1g20100.1                                            | -0.904 |    | -0.752 | -0.282 | -0.038 |
| A002338_01 | At1g32360 | putative MYB family transcription factor; protein id: At1g32360.1                     | -0.226 |    | -0.589 | -0.293 | -0.427 |
| A002345_01 | At1g15880 | cis-Golgi SNARE protein, putative; protein id: At1g15880.1                            | -0.416 |    | -0.76  | -0.587 | -0.304 |
| A002346_01 | At1g72330 | putative alanine aminotransferase; protein id: At1g72330.1                            | -0.195 |    | -0.33  | -0.831 | -0.485 |
| A002349_01 | At1g22050 | expressed protein; protein id: At1g22050.1                                            | -1.16  |    | -1.417 | -0.869 | -0.473 |
| A002356_01 | At1g26690 | expressed protein; protein id: At1g26690.1                                            | -0.038 |    | 0.115  | 0.201  | 0.121  |
| A002359_01 | At1g07110 | fructose-2,6-bisphosphatase, putative; protein id: At1g07110.1                        | -0.503 |    | -1.007 | -0.902 | -0.923 |
| A002363_01 | At1g09420 | putative glucose-6-phosphate dehydrogenase; protein id: At1g09420.1                   | -0.649 |    | -0.618 | -0.601 | -0.615 |
| A002365_01 | At1g21570 | glycine-rich RNA-binding domain grp1a, putative; protein id: At1g21570.1              | -0.954 | NA | NA     |        | -0.798 |
| A002368_01 | xxxx      | b/t hypothetical protein; protein id: At1g80990.1 and                                 | -0.191 |    | -0.037 | -0.333 | 0.069  |
| A002369_01 | At1g50670 | unknown protein; protein id: At1g50670.1                                              | -0.009 |    | -0.209 | -0.103 | 0.376  |
| A002370_01 | At1g50620 | hypothetical protein; protein id: At1g50620.1                                         | 0.215  |    | 0.13   | NA     | 0.385  |
| A002372_01 | At1g50510 | unknown protein; protein id: At1g50510.1                                              | 0.142  |    | 0.16   | 0.3    | 0.397  |
| A002374_01 | At1g29170 | hypothetical protein; protein id: At1g29170.1                                         | 0.299  |    | 0.397  | NA     | 0.412  |
| A002376_01 | At1g17780 | unknown protein; protein id: At1g17780.1                                              | -1.115 | NA | NA     | NA     |        |
| A002378_01 | At1g17930 | expressed protein; protein id: At1g17930.1                                            | 0.039  |    | -0.161 | NA     | 0.213  |
| A002383_01 | At1g33811 | unknown protein; protein id: At1g33811.1                                              | -0.018 | NA |        | 0.073  | 0.21   |
| A002385_01 | At1g01360 | expressed protein; protein id: At1g01360.1                                            | -1.319 |    | -1.158 | -0.127 | -0.16  |
| A002387_01 | At1g24440 | expressed protein; protein id: At1g24440.1                                            | -0.973 |    | -0.818 | -0.364 | -0.608 |
| A002390_01 | At1g24610 | expressed protein; protein id: At1g24610.1                                            | 0.561  |    | 0.609  | 0.123  | 0.228  |
| A002393_01 | At1g26550 | expressed protein; protein id: At1g26550.1                                            | -0.114 |    | -0.213 | 0.2    | 0.03   |
| A002405_01 | At1g28190 | hypothetical protein; protein id: At1g28190.1                                         | NA     | NA | NA     | NA     |        |
| A002408_01 | At1g16960 | hypothetical protein; protein id: At1g16960.1                                         | -1.231 |    | -1.189 | -0.902 | -1.816 |
| A002409_01 | At1g16950 | hypothetical protein; protein id: At1g16950.1                                         | -2.675 |    | -2.231 | -0.301 | -1.156 |
| A002412_01 | At1g16900 | Ser Thr protein kinase, putative; protein id: At1g16900.1                             | 0.451  |    | 0.301  | 0.041  | 0.341  |
| A002413_01 | At1g16870 | unknown protein; protein id: At1g16870.1                                              | 0.829  |    | 0.837  | NA     | 1.039  |
| A002417_01 | At1g16730 | hypothetical protein; protein id: At1g16730.1                                         | NA     | NA | NA     | NA     |        |
| A002418_01 | At1g16705 | expressed protein; protein id: At1g16705.1                                            | -0.156 |    | -0.244 | 0.766  | 0.804  |
| A002425_01 | At1g57540 | hypothetical protein; protein id: At1g57540.1                                         | -0.117 |    | 0.327  | 0.183  | NA     |
| A002429_01 | At1g19750 | G-protein beta-subunit (transducin) family; protein id: At1g19750.1                   | -0.446 | NA | NA     |        | 0.423  |
| A002432_01 | At1g53120 | expressed protein; protein id: At1g53120.1                                            | 0.086  |    | 0.211  | -0.235 | -0.175 |
| A002433_01 | At1g53130 | unknown protein; protein id: At1g53130.1                                              | 1.495  |    | 1.49   | 1.693  | 2.516  |
| A002437_01 | At1g75390 | bZIP transcription factor ATB2, putative; protein id: At1g75390.1                     | 0.417  |    | 0.304  | 0.619  | 1.156  |
| A002441_01 | At1g27100 | unknown protein; protein id: At1g27100.1                                              | -1.613 | NA |        | -1.054 | -1.427 |
| A002454_01 | At1g28680 | anthranilate N-hydroxycinnamoyl/benzoyltransferase; protein id: At1g28680.1           | -0.826 |    | -0.784 | NA     | -0.058 |
| A002461_01 | At1g06530 | hypothetical protein; protein id: At1g06530.1                                         | 0.187  | NA |        | 0.153  | -0.172 |
| A002473_01 | At1g69110 | pseudogene, putative ribosomal protein                                                | -1.832 |    | -1.465 | -0.588 | -1.135 |
| A002476_01 | At1g78020 | expressed protein; protein id: At1g78020.1                                            | -0.814 |    | 0.192  | -0.048 | -0.059 |
| A002480_01 | At1g10660 | unknown protein; protein id: At1g10660.1                                              | -0.653 | NA |        | -0.435 | -0.581 |
| A002484_01 | At1g76300 | small nuclear ribonucleoprotein, putative; protein id: At1g76300.1                    | 0.821  |    | 0.873  | 0.643  | 0.514  |
| A002488_01 | At1g76110 | unknown protein; protein id: At1g76110.1                                              | -1.11  |    | -1.102 | -0.787 | -1.066 |
| A002489_01 | At1g14590 | hypothetical protein common family; protein id: At1g14590.1                           | 0.498  | NA | NA     |        | 0.517  |
| A002491_01 | At1g11380 | expressed protein; protein id: At1g11380.1                                            | -0.729 |    | -0.643 | -0.357 | -1.12  |
| A002506_01 | At1g48970 | hypothetical protein; protein id: At1g48970.1                                         | -0.185 | NA | NA     |        | -0.223 |
| A002514_01 | At1g19300 | glycosyltransferase family; protein id: At1g19300.1                                   | -0.994 |    | -0.635 | -0.557 | -1.354 |
| A002522_01 | At1g11090 | lysophospholipase isolog; protein id: At1g11090.1                                     | -0.214 |    | -0.099 | 0.021  | 0.13   |
| A002523_01 | At1g76810 | translation initiation factor eIF-2, putative; protein id: At1g76810.1                | 0.203  |    | -0.143 | -0.207 | -0.13  |
| A002525_01 | At1g76650 | putative calmodulin; protein id: At1g76650.1                                          | NA     | NA |        | -1.653 | -2.937 |
| A002534_01 | At1g13690 | expressed protein; protein id: At1g13690.1                                            | 0.602  |    | 0.443  | 0.188  | 0.096  |
| A002535_01 | At1g07960 | unknown protein; protein id: At1g07960.1                                              | 0.477  |    | 0.419  | 0.41   | 0.254  |
| A002537_01 | At1g19710 | hypothetical protein; protein id: At1g19710.1                                         | 0.752  |    | 0.862  | NA     | 1.39   |
| A002539_01 | At1g32170 | xyloglucan endotransglycosylase (XTR4), putative; protein id: At1g32170.1             | -1.48  | NA |        | -1.158 | -1.753 |
| A002540_01 | At1g21710 | 8-oxoguanine DNA glycosylase-like protein; protein id: At1g21710.1                    | 0.336  |    | 0.339  | 0.13   | 0.809  |
| A002542_01 | At1g51140 | expressed protein; protein id: At1g51140.1                                            | -1.236 |    | -1.245 | NA     | 0.181  |
| A002545_01 | At1g77350 | expressed protein; protein id: At1g77350.1                                            | 0.638  |    | 0.428  | 0.487  | 0.416  |
| A002557_01 | At1g73250 | GDP-4-keto-6-deoxy-D-mannose-3,5-epimerase-4-related protein; protein id: At1g73250.1 | 0.564  |    | 0.563  | NA     | 0.275  |
| A002558_01 | At1g62250 | unknown protein; protein id: At1g62250.1                                              | -0.422 |    | -0.718 | -0.541 | -0.785 |
| A002560_01 | At1g67190 | F-box protein family; protein id: At1g67190.1                                         | -0.316 | NA | NA     |        | 0.179  |
| A002561_01 | At1g55480 | expressed protein; protein id: At1g55480.1                                            | 0.217  |    | 0.19   | -0.349 | -0.607 |
| A002562_01 | At1g48520 | expressed protein; protein id: At1g48520.1                                            | 0.854  |    | 0.871  | -0.09  | 0.787  |
| A002580_01 | At1g22480 | uclacyanin II, putative; protein id: At1g22480.1                                      | -2.511 |    | -1.656 | -1.468 | -1.586 |
| A002588_01 | At1g22430 | alcohol dehydrogenase ADH, putative; protein id: At1g22430.1                          | -0.246 |    | -0.3   | -0.454 | -0.246 |

|            |           |                                                                                       |           |           |        |        |
|------------|-----------|---------------------------------------------------------------------------------------|-----------|-----------|--------|--------|
| A002592_01 | At1g05140 | expressed protein; protein id: At1g05140.1                                            | -0.608    | -0.446    | -0.451 | -0.459 |
| A002599_01 | At1g78600 | CONSTANS B-box zinc finger family protein; protein id: At1g78600.1                    | 0.793     | 0.999     | -0.027 | 0.205  |
| A002608_01 | At1g30120 | pyruvate dehydrogenase E1 beta subunit, putative; protein id: At1g30120.1             | 0.266     | 0.28      | 0.224  | 0.474  |
| A002609_01 | At1g19220 | auxin response factor, putative; protein id: At1g19220.1                              | -0.585 NA | NA        | NA     | NA     |
| A002610_01 | At1g22450 | cytochrome c oxidase subunit, putative; protein id: At1g22450.1                       | 0.663     | 0.281     | 0.39   | 0.439  |
| A002618_01 | At1g23060 | expressed protein; protein id: At1g23060.1                                            | -0.919    | -1.11 NA  | NA     | 0.249  |
| A002623_01 | At1g12420 | hypothetical protein; protein id: At1g12420.1                                         | 0.283 NA  | NA        | 0.06   | 0.898  |
| A002626_01 | At1g79210 | proteasome alpha subunit, putative; protein id: At1g79210.1                           | 0.374 NA  | NA        | NA     | 0.407  |
| A002632_01 | At1g12580 | calcium-dependent protein kinase, putative; protein id: At1g12580.1                   | -0.253    | -0.072 NA | NA     | -0.445 |
| A002634_01 | At1g73670 | putative MAP kinase; protein id: At1g73670.1                                          | -0.587    | -0.344    | -0.66  | -0.247 |
| A002641_01 | At1g12350 | hypothetical protein; protein id: At1g12350.1                                         | 0.182     | 0.074     | 0.203  | 0.04   |
| A002642_01 | At1g73170 | putative ATPase; protein id: At1g73170.1                                              | -0.226    | -0.103    | -0.164 | 0.113  |
| A002643_01 | At1g12010 | putative amino-cyclopropane-carboxylic acid oxidase; protein id: At1g12010.1          | -3.692    | -3.108    | -1.109 | -1.679 |
| A002644_01 | At1g73530 | RRM-containing RNA-binding protein, putative; protein id: At1g73530.1                 | 0.183 NA  | NA        | 0.2    | -0.294 |
| A002646_01 | At1g72710 | putative casein kinase I; protein id: At1g72710.1                                     | -0.648    | -0.652    | -0.117 | -0.623 |
| A002647_01 | At1g12330 | hypothetical protein; protein id: At1g12330.1                                         | 0.866     | 1.107     | 0.876  | 1.249  |
| A002648_01 | At1g11890 | putative vesicle transport protein; protein id: At1g11890.1                           | 0.132     | 0.083     | 0.265  | 0.164  |
| A002650_01 | At1g70420 | expressed protein; protein id: At1g70420.1                                            | -1.442 NA | NA        | NA     | NA     |
| A002651_01 | At1g70410 | carbonic anhydrase, putative; protein id: At1g70410.1                                 | -0.665    | -0.84     | -0.398 | -0.521 |
| A002656_01 | At1g20580 | expressed protein; protein id: At1g20580.1                                            | 0.395     | 0.62      | 0.609  | 0.883  |
| A002658_01 | At1g12910 | flower pigmentation protein ATAN11; protein id: At1g12910.1                           | -0.23     | -0.26     | -0.098 | 0.024  |
| A002659_01 | At1g73430 | unknown protein; protein id: At1g73430.1                                              | 0.238     | 0.416     | -0.039 | 0.373  |
| A002660_01 | At1g72640 | hypothetical protein; protein id: At1g72640.1                                         | -0.076    | 0.144     | -0.217 | -0.371 |
| A002662_01 | At1g72550 | putative phenylalanyl-tRNA synthetase beta-subunit; protein id: At1g72550.1           | 0.25      | 0.291     | 0.204  | 0.607  |
| A002672_01 | At1g20670 | hypothetical protein; protein id: At1g20670.1                                         | -0.727    | -0.393 NA | NA     | -0.6   |
| A002674_01 | At1g67900 | unknown protein; protein id: At1g67900.1                                              | -0.699 NA | NA        | NA     | -0.429 |
| A002675_01 | At1g23400 | unknown protein; protein id: At1g23400.1                                              | 0.022     | -0.218    | -0.294 | -0.242 |
| A002676_01 | At1g61810 | glycosyl hydrolase family 1; protein id: At1g61810.1                                  | -2.934 NA | NA        | -2.043 | -2.872 |
| A002677_01 | At1g61890 | expressed protein; protein id: At1g61890.1                                            | -0.161    | -0.05     | -0.089 | -0.175 |
| A002678_01 | At1g61990 | hypothetical protein; protein id: At1g61990.1                                         | 0.619     | 0.75 NA   | NA     | 0.817  |
| A002692_01 | At1g31300 | expressed protein; protein id: At1g31300.1                                            | -0.183    | -0.113    | -0.098 | -0.079 |
| A002695_01 | At1g56340 | calreticulin (crt1); protein id: At1g56340.1                                          | 1.267     | 1.148     | 1.018  | 1.397  |
| A002696_01 | At1g55510 | branched-chain alpha-keto acid decarboxylase E1 beta subunit; protein id: At1g55510.1 | -0.88     | -0.959    | -0.543 | -1.007 |
| A002699_01 | At1g54850 | hypothetical protein; protein id: At1g54850.1                                         | 0.014 NA  | NA        | NA     | 0.288  |
| A002702_01 | At1g15100 | putative RING-H2 zinc finger protein; protein id: At1g15100.1                         | -1.848    | -1.587    | -0.396 | -1.005 |
| A002703_01 | At1g03370 | unknown protein; protein id: At1g03370.1                                              | 0.097     | -0.11 NA  | NA     | -0.195 |
| A002704_01 | At1g23490 | putative ADP-ribosylation factor; protein id: At1g23490.1                             | -0.14     | 0.024     | -0.17  | -0.266 |
| A002706_01 | At1g03190 | putative DNA repair protein; protein id: At1g03190.1                                  | 0.01 NA   | NA        | NA     | 0.023  |
| A002712_01 | At1g32220 | expressed protein; protein id: At1g32220.1                                            | -0.147    | 0.254     | -0.711 | -0.803 |
| A002713_01 | At1g78780 | expressed protein; protein id: At1g78780.1                                            | -0.068    | -0.034    | 0.369  | 0.204  |
| A002718_01 | At1g06890 | unknown protein; protein id: At1g06890.1                                              | NA        | NA        | -0.067 | -0.131 |
| A002721_01 | At1g78790 | hypothetical protein; protein id: At1g78790.1                                         | -0.251 NA | NA        | NA     | NA     |
| A002724_01 | At1g48050 | regulatory protein, putative; protein id: At1g48050.1                                 | 0.085     | 0.154 NA  | NA     | 0.034  |
| A002732_01 | At1g73680 | feebly-like protein; protein id: At1g73680.1                                          | -0.953    | -1.166    | -1.113 | -1.172 |
| A002733_01 | At1g15400 | expressed protein; protein id: At1g15400.1                                            | -0.857    | -0.65     | -0.273 | -0.855 |
| A002735_01 | At1g55680 | expressed protein; protein id: At1g55680.1                                            | -0.725    | -0.545    | -0.446 | 0.13   |
| A002736_01 | At1g29760 | hypothetical protein; protein id: At1g29760.1                                         | -1.351    | -1.164    | -0.803 | -0.302 |
| A002737_01 | At1g28580 | lipase, putative; protein id: At1g28580.1                                             | -1.679    | -1.351    | -0.75  | -0.736 |
| A002738_01 | At1g76100 | plastocyanin; protein id: At1g76100.1                                                 | 0.203     | 0.013     | 0.007  | -0.596 |
| A002741_01 | At1g72610 | germin-like protein; protein id: At1g72610.1                                          | 1.014     | 0.732     | 0.366  | 0.794  |
| A002742_01 | At1g74950 | expressed protein; protein id: At1g74950.1                                            | -0.353    | -0.431    | -0.224 | -0.383 |
| A002744_01 | At1g03970 | G-box binding factor 4, GBF4; protein id: At1g03970.1                                 | -0.742    | -0.701    | -0.305 | -0.682 |
| A002750_01 | At1g17720 | type 2A protein serine/threonine phosphatase 55 kDa; protein id: At1g17720.1          | 0.095     | 0.24 NA   | NA     | -0.527 |
| A002762_01 | At1g52880 | NAM-like protein; protein id: At1g52880.1                                             | -3.086    | -3.004    | -1.94  | -3.046 |
| A002768_01 | At1g17100 | SOUL-like protein; protein id: At1g17100.1                                            | 0.208     | 0.261     | 0.285  | 0.447  |
| A002772_01 | At1g17470 | developmentally regulated GTP-binding protein; protein id: At1g17470.1                | 0.069     | 0.167     | 0.058  | 0.65   |
| A002773_01 | At1g57610 | hypothetical protein; protein id: At1g57610.1                                         | 0.39 NA   | NA        | 0.553  | 0.826  |
| A002774_01 | At1g61790 | hypothetical protein; protein id: At1g61790.1                                         | 0.754     | 0.696     | 0.304  | 0.922  |
| A002777_01 | At1g04910 | growth regulator protein; protein id: At1g04910.1                                     | 0.409     | 0.145 NA  | NA     | 0.413  |
| A002779_01 | At1g69740 | putative aminolevulinic acid dehydratase; protein id: At1g69740.1                     | 0.859     | 0.673     | 0.092  | 0.469  |
| A002780_01 | At1g74210 | putative glycerophosphodiester phosphodiesterase; protein id: At1g74210.1             | -0.335 NA | NA        | NA     | 0.515  |
| A002782_01 | At1g67950 | RRM-containing protein; protein id: At1g67950.1                                       | 1.037     | 1.183     | 1.009  | 1.105  |
| A002787_01 | At1g52300 | 60S ribosomal protein L37, putative; protein id: At1g52300.1                          | 0.683     | 0.726     | 0.747  | 1.011  |
| A002788_01 | At1g17550 | protein phosphatase 2C, putative; protein id: At1g17550.1                             | -0.895    | -1.014    | -0.842 | -0.747 |
| A002793_01 | At1g54070 | unknown protein; protein id: At1g54070.1                                              | -0.517    | -0.43     | -0.709 | -2.108 |
| A002795_01 | At1g17490 | expressed protein; protein id: At1g17490.1                                            | -0.182    | 0.36 NA   | NA     | -0.223 |
| A002797_01 | At1g54710 | expressed protein; protein id: At1g54710.1                                            | -1.116 NA | NA        | -0.885 | -0.833 |
| A002798_01 | At1g53570 | MAP3K alpha protein kinase, putative; protein id: At1g53570.1                         | -1.735 NA | NA        | -1.242 | -1.798 |

|            |           |                                                         |           |           |        |        |
|------------|-----------|---------------------------------------------------------|-----------|-----------|--------|--------|
| A002800_01 | At1g76150 | hypothetical protein; protein id: At1g76150.1           | -0.819    | -1.073    | -0.882 | -0.699 |
| A002809_01 | At1g20890 | unknown protein; protein id: At1g20890.1                | -0.279 NA |           | 0.026  | -0.607 |
| A002818_01 | At1g21920 | phosphatidylinositol-4-phosphate 5-kinase, putative     | -2.143    | -2.192    | -1.585 | -1.981 |
| A002820_01 | At1g21600 | expressed protein; protein id: At1g21600.1              | 0.285     | 0.18      | -0.554 | -0.242 |
| A002822_01 | At1g19580 | expressed protein; protein id: At1g19580.1              | 0.564     | 0.746     | 0.356  | 0.552  |
| A002823_01 | At1g08640 | expressed protein; protein id: At1g08640.1              | 0.39      | 0.572     | -0.141 | 0.172  |
| A002830_01 | At1g29260 | peroxisomal targeting signal type 2 receptor Pex7p;     | -0.436 NA |           | -0.214 | -0.531 |
| A002834_01 | At1g10500 | unknown protein; protein id: At1g10500.1                | -1.654    | -1.488    | -1.153 | -1.387 |
| A002838_01 | At1g08980 | expressed protein; protein id: At1g08980.1              | -0.698 NA |           | -0.625 | -0.908 |
| A002841_01 | At1g79230 | mercaptopyruvate sulfurtransferase (Mst1/Rdh1); pr      | 0.691     | 0.491     | 0.408  | 0.751  |
| A002842_01 | At1g16340 | putative 3-deoxy-D-manno-2-octulosonate-8-phosph        | 1.028     | 0.875     | 0.659  | 1.056  |
| A002851_01 | At1g43710 | histidine decarboxylase, putative; protein id: At1g43   | 0.352     | -0.065    | 0.026  | 0.242  |
| A002854_01 | At1g80310 | putative sulfate transporter; protein id: At1g80310.1   | -2.05     | -1.896    | -1.733 | -2.873 |
| A002855_01 | At1g32700 | expressed protein; protein id: At1g32700.1              | -2.008    | -2.453    | -1.287 | -1.093 |
| A002858_01 | At1g26580 | hypothetical protein; protein id: At1g26580.1           | -0.294    | -0.408    | -0.443 | -0.383 |
| A002863_01 | At1g54520 | expressed protein; protein id: At1g54520.1              | -0.695    | -0.564    | -0.616 | -0.782 |
| A002866_01 | At1g01510 | expressed protein; protein id: At1g01510.1              | 0.626     | 0.729 NA  |        | 0.926  |
| A002869_01 | At1g30400 | glutathione S-conjugate ABC transporter (AtMRP1);       | -0.726    | -0.866    | -0.544 | -0.236 |
| A002871_01 | At1g34300 | hypothetical protein; protein id: At1g34300.1           | -0.582    | -0.815 NA |        | -1.234 |
| A002875_01 | At1g79280 | hypothetical protein; protein id: At1g79280.1           | 0.208 NA  | NA        |        | 0.104  |
| A002881_01 | At1g15425 | expressed protein; protein id: At1g15425.1              | 0.413     | 0.325     | 0.51   | 0.957  |
| A002895_01 | At1g56190 | phosphoglycerate kinase, putative; protein id: At1g5    | 0.156     | 0.173     | -0.619 | -0.865 |
| A002896_01 | At1g32760 | unknown protein; protein id: At1g32760.1                | -0.004    | -0.13 NA  |        | -0.023 |
| A002898_01 | At1g34630 | hypothetical protein; protein id: At1g34630.1           | -0.932 NA | NA        |        | -0.609 |
| A002901_01 | At1g32790 | RNA-binding protein, putative; protein id: At1g32790    | -0.429 NA |           | -0.015 | -0.11  |
| A002902_01 | At1g76920 | F-box protein family, AtFBX3; protein id: At1g76920     | -0.506    | -0.463    | -0.329 | -0.158 |
| A002904_01 | At1g47530 | unknown protein; protein id: At1g47530.1                | -0.809    | -0.705    | -0.65  | -0.975 |
| A002907_01 | At1g21500 | expressed protein; protein id: At1g21500.1              | 0.072     | 0.544     | -0.03  | -0.976 |
| A002908_01 | At1g52420 | glycosyl transferase, putative; protein id: At1g52420   | 0.691     | 0.609     | -0.095 | 0.61   |
| A002916_01 | At1g68670 | expressed protein; protein id: At1g68670.1              | -0.447    | -0.633    | -0.627 | -0.451 |
| A002917_01 | At1g68620 | expressed protein; protein id: At1g68620.1              | -3.021 NA |           | -1.102 | -1.981 |
| A002919_01 | At1g65260 | expressed protein; protein id: At1g65260.1              | -0.172    | -0.179    | -0.569 | -0.541 |
| A002922_01 | At1g80830 | metal ion transporter; protein id: At1g80830.1          | -1.705    | -1.406    | -1.06  | -0.897 |
| A002923_01 | At1g74940 | expressed protein; protein id: At1g74940.1              | -0.812    | -0.528    | -0.669 | -0.316 |
| A002934_01 | At1g80000 | expressed protein; protein id: At1g80000.1              | -0.253 NA | NA        |        | -0.931 |
| A002939_01 | At1g80230 | cytochrome c oxidase subunit, putative; protein id: /   | -0.042    | 0.484     | 0.153  | -0.293 |
| A002940_01 | At1g34560 | hypothetical protein; protein id: At1g34560.1           | 0.161     | -0.139    | -0.259 | -0.55  |
| A002946_01 | At1g52720 | expressed protein; protein id: At1g52720.1              | 0.475     | 0.581     | 0.086  | -0.212 |
| A002950_01 | At1g52590 | expressed protein; protein id: At1g52590.1              | -1.243    | -1.301    | -1.372 | -1.472 |
| A002952_01 | At1g34640 | expressed protein; protein id: At1g34640.1              | -0.336    | 0.357     | 0.603  | 0.351  |
| A002955_01 | At1g72820 | mitochondrial carrier protein family; protein id: At1g; | -0.388 NA |           | -0.155 | -0.181 |
| A002958_01 | At1g22610 | phosphoribosylanthranilate transferase, putative; pr    | -0.563 NA | NA        |        | -0.401 |
| A002977_01 | At1g19130 | expressed protein; protein id: At1g19130.1              | -0.125    | 0.211     | 0.057  | 0.062  |
| A002982_01 | At1g14650 | splicing factor, putative; protein id: At1g14650.1      | -0.142 NA | NA        |        | -0.797 |
| A002988_01 | At1g04220 | putative beta-ketoacyl-CoA synthase; protein id: At1    | -0.192    | -0.078    | 0.973  | 1.588  |
| A002991_01 | At1g63460 | glutathione peroxidase, putative; protein id: At1g634   | 0.149     | 0.222     | 0.253  | 0.064  |
| A002993_01 | At1g63430 | leucine-rich repeat transmembrane protein kinase, p     | 0.192     | 0.338     | -0.02  | 0.37   |
| A002997_01 | At1g56140 | similar to receptor-like protein kinase, putative; prot | -0.564 NA | NA        |        | -0.49  |
| A002998_01 | At1g50320 | thioredoxin, putative; protein id: At1g50320.1          | -0.795    | -0.417    | -0.41  | -0.933 |
| A002999_01 | At1g56580 | expressed protein; protein id: At1g56580.1              | 0.872     | 0.893     | 1.556  | 1.694  |
| A003001_01 | At1g08970 | putative transcription factor; protein id: At1g08970.1  | -0.542    | -0.409    | 0.072  | -0.035 |
| A003003_01 | At1g54370 | hypothetical protein; protein id: At1g54370.1           | -0.299    | 0.181 NA  |        | 0.312  |
| A003004_01 | At1g77930 | expressed protein; protein id: At1g77930.1              | -1.644    | -1.38     | -0.761 | -0.786 |
| A003006_01 | At1g79850 | 30S ribosomal protein S17, chloroplast precursor (C     | 0.575     | 0.526     | 0.372  | -0.003 |
| A003011_01 | At1g47310 | expressed protein; protein id: At1g47310.1              | -0.106    | -0.14 NA  |        | -0.205 |
| A003012_01 | At1g71480 | unknown protein; protein id: At1g71480.1                | -1.306 NA | NA        | NA     |        |
| A003016_01 | At1g55000 | expressed protein; protein id: At1g55000.1              | -1.09     | -0.782    | -0.792 | -0.563 |
| A003018_01 | At1g70810 | expressed protein; protein id: At1g70810.1              | -2.252 NA | NA        | NA     |        |
| A003023_01 | At1g62740 | TPR-repeat protein; protein id: At1g62740.1             | 0.035     | -0.019    | -0.178 | 0.065  |
| A003024_01 | At1g01610 | hypothetical protein; protein id: At1g01610.1           | -0.047    | 0.566     | 0.475  | 0.431  |
| A003029_01 | At1g62780 | unknown protein; protein id: At1g62780.1                | 0.384     | -0.048    | -0.13  | 0.161  |
| A003034_01 | At1g21980 | phosphatidylinositol-4-phosphate 5-kinase, putative     | 0.243     | 0.225 NA  |        | 0.371  |
| A003036_01 | At1g42970 | glyceraldehyde-3-phosphate dehydrogenase; protei        | 0.003     | -0.071    | -0.71  | -0.422 |
| A003037_01 | At1g10690 | unknown protein; protein id: At1g10690.1                | NA        | NA        | NA     | NA     |
| A003039_01 | At1g28440 | leucine-rich repeat transmembrane protein kinase, p     | -0.409 NA | NA        |        | -0.44  |
| A003042_01 | At1g07140 | Ran-binding protein (atranbp1a); protein id: At1g071    | 0.393     | 0.61      | -0.077 | 0.119  |
| A003045_01 | At1g52740 | putative histone H2A; protein id: At1g52740.1           | -0.081    | -0.132    | 0.156  | -0.197 |
| A003050_01 | At1g16570 | unknown protein; protein id: At1g16570.1                | 0.267 NA  |           | 0.089  | 0.056  |

|            |           |                                                        |        |        |        |        |
|------------|-----------|--------------------------------------------------------|--------|--------|--------|--------|
| A003054_01 | At1g16810 | expressed protein; protein id: At1g16810.1             | -0.254 | -0.333 | 0.092  | -0.402 |
| A003055_01 | At1g18060 | expressed protein; protein id: At1g18060.1             | 0.492  | 0.441  | 0.069  | -0.033 |
| A003056_01 | At1g28150 | expressed protein; protein id: At1g28150.1             | -0.047 | 0.426  | 0.146  | -0.248 |
| A003058_01 | At1g77180 | expressed protein; protein id: At1g77180.1             | -0.306 | -0.295 | -0.313 | -0.314 |
| A003059_01 | At1g26220 | unknown protein; protein id: At1g26220.1               | -0.326 | 0.047  | -0.246 | -0.766 |
| A003060_01 | At1g17620 | expressed protein; protein id: At1g17620.1             | -0.29  | -0.184 | -0.135 | -1.156 |
| A003070_01 | At1g73600 | phosphoethanolamine N-methyltransferase, putative      | 0.396  | 0.364  | 1.04   | 1.91   |
| A003078_01 | At1g52980 | putative GTP-binding protein; protein id: At1g52980    | 0.494  | 0.597  | NA     | 0.552  |
| A003079_01 | At1g31870 | unknown protein; protein id: At1g31870.1               | 0.167  | 0.13   | 0.008  | 0.568  |
| A003084_01 | At1g05340 | expressed protein; protein id: At1g05340.1             | -3.019 | -2.724 | -1.027 | -2.678 |
| A003092_01 | At1g17710 | hypothetical protein; protein id: At1g17710.1          | -0.642 | NA     | NA     | 0.097  |
| A003101_01 | At1g06550 | 3-hydroxyisobutyryl-coenzyme A hydrolase, putative     | 1.009  | 0.482  | 0.618  | 1.319  |
| A003106_01 | At1g47830 | clathrin coat assembly protein AP17, putative; prote   | 0.331  | 0.534  | 0.38   | 0.322  |
| A003107_01 | At1g27210 | expressed protein; protein id: At1g27210.1             | 0.205  | 0.21   | 0.232  | 0.575  |
| A003109_01 | At1g18460 | unknown protein; protein id: At1g18460.1               | -0.471 | -0.384 | -0.145 | -0.002 |
| A003110_01 | At1g45160 | hypothetical protein; protein id: At1g45160.1          | -0.475 | -0.308 | NA     | -0.516 |
| A003112_01 | At1g27385 | expressed protein; protein id: At1g27385.1             | -0.161 | -0.04  | -0.057 | -0.573 |
| A003113_01 | At1g25420 | expressed protein; protein id: At1g25420.1             | -0.355 | NA     | NA     | 0.058  |
| A003114_01 | At1g19450 | integral membrane protein, putative; protein id: At1g  | -0.697 | -1.103 | -1.226 | -1.692 |
| A003117_01 | At1g29820 | unknown protein; protein id: At1g29820.1               | -0.228 | -0.156 | -0.177 | -0.13  |
| A003121_01 | At1g55110 | zinc finger protein, putative; protein id: At1g55110.1 | -0.949 | -0.977 | -0.309 | -0.708 |
| A003124_01 | At1g19200 | hypothetical protein; protein id: At1g19200.1          | NA     | NA     | NA     | NA     |
| A003130_01 | At1g30090 | expressed protein; protein id: At1g30090.1             | -1.031 | NA     | -0.474 | -0.377 |
| A003131_01 | At1g49180 | hypothetical protein; protein id: At1g49180.1          | -0.658 | NA     | NA     | -0.36  |
| A003134_01 | At1g26440 | fatty acid elongase 3-ketoacyl-CoA synthase 1; prot    | -0.979 | -0.805 | -0.597 | -0.529 |
| A003137_01 | At1g25350 | tRNA-glutamine synthetase, putative; protein id: At1   | 0.039  | 0.153  | 0.161  | 0.529  |
| A003138_01 | At1g78570 | dTDP-glucose 4,6-dehydratase, putative; protein id:    | 1.552  | 1.127  | 0.755  | 1.308  |
| A003141_01 | At1g21065 | expressed protein; protein id: At1g21065.1             | -1.323 | -1.236 | -1.169 | -1.656 |
| A003148_01 | At1g11170 | hypothetical protein; protein id: At1g11170.1          | NA     | NA     | NA     | NA     |
| A003154_01 | At1g61870 | expressed protein; protein id: At1g61870.1             | 1.29   | 1.166  | 0.92   | 1.589  |
| A003164_01 | At1g01230 | expressed protein; protein id: At1g01230.1             | -0.269 | NA     | NA     | -0.419 |
| A003170_01 | At1g52730 | unknown protein; protein id: At1g52730.1               | -0.039 | 0.018  | NA     | 0.403  |
| A003174_01 | At1g13640 | ubiquitin, putative; protein id: At1g13640.1           | -0.054 | -0.023 | -0.517 | -0.682 |
| A003181_01 | At1g72090 | expressed protein; protein id: At1g72090.1             | 0.768  | 0.723  | 0.49   | 0.767  |
| A003184_01 | At1g72050 | C2H2-type zinc finger protein, putative; protein id: A | 0.001  | -0.197 | 0.252  | 0.504  |
| A003186_01 | At1g67070 | phosphomannose isomerase, putative; protein id: A      | -1.527 | NA     | NA     | -1.242 |
| A003189_01 | At1g66490 | hypothetical protein; protein id: At1g66490.1          | 0.005  | 0.358  | 0.192  | 0.063  |
| A003190_01 | At1g60000 | chloroplast RNA-binding protein, putative; protein id  | 0.095  | 0.146  | -0.03  | -0.125 |
| A003194_01 | At1g18490 | expressed protein; protein id: At1g18490.1             | 0.117  | 0.572  | 0.14   | 0.24   |
| A003197_01 | At1g54500 | rubredoxin, putative; protein id: At1g54500.1          | -0.103 | 0.003  | -0.075 | -0.359 |
| A003198_01 | At1g08460 | expressed protein; protein id: At1g08460.1             | -0.404 | -0.272 | -0.415 | -0.708 |
| A003199_01 | At1g49150 | hypothetical protein; protein id: At1g49150.1          | -0.016 | 0.007  | 0.103  | -0.16  |
| A003207_01 | At1g37130 | nitrate reductase, putative; protein id: At1g37130.1   | -0.915 | -0.821 | -0.923 | -0.981 |
| A003208_01 | At1g49950 | DNA-binding protein PcMYB1, putative; protein id: A    | -0.106 | -0.049 | -0.098 | -0.268 |
| A003209_01 | At1g50530 | hypothetical protein; protein id: At1g50530.1          | -0.189 | 0.26   | NA     | -0.199 |
| A003213_01 | At1g49200 | RING-H2 finger protein RHA3a, putative; protein id:    | -0.391 | NA     | NA     | -0.446 |
| A003214_01 | At1g65650 | expressed protein; protein id: At1g65650.1             | 0.251  | 0.065  | 0.442  | 0.442  |
| A003217_01 | At1g53210 | expressed protein; protein id: At1g53210.1             | -0.206 | -0.102 | -0.233 | -0.12  |
| A003222_01 | At1g41830 | pectinesterase (pectin methylesterase), putative; pr   | 1.437  | 1.244  | 0.859  | 1.05   |
| A003235_01 | At1g04690 | putative K+ channel, beta subunit; protein id: At1g0   | -0.103 | -0.165 | 0.098  | 0.319  |
| A003237_01 | At1g19380 | hypothetical protein; protein id: At1g19380.1          | NA     | NA     | -0.722 | -1.543 |
| A003242_01 | At1g80300 | adenine nucleotide translocase; protein id: At1g803    | -0.776 | -0.385 | -0.687 | -0.955 |
| A003245_01 | At1g24450 | putative ribonuclease III; protein id: At1g24450.1     | -0.027 | 0.206  | 0.084  | -0.412 |
| A003250_01 | At1g07650 | leucine-rich repeat transmembrane protein kinase, p    | -0.12  | 0.009  | 0.366  | 0.588  |
| A003252_01 | At1g33270 | expressed protein; protein id: At1g33270.1             | -0.553 | -0.512 | -0.162 | -0.213 |
| A003263_01 | At1g01540 | protein serine/threonine kinase, putative; protein id: | 0.349  | 0.065  | -0.113 | -0.267 |
| A003264_01 | At1g64720 | membrane related protein CP5, putative; protein id:    | -0.16  | -0.613 | -0.52  | -0.218 |
| A003266_01 | At1g55920 | serine acetyltransferase; protein id: At1g55920.1      | -1.958 | NA     | NA     | NA     |
| A003274_01 | At1g30610 | hypothetical protein; protein id: At1g30610.1          | 0.383  | 0.585  | 0.242  | 0.841  |
| A003276_01 | At1g11860 | aminomethyltransferase-like precursor protein; prot    | 0.076  | -0.135 | 0.074  | 0.094  |
| A003277_01 | At1g61670 | hypothetical protein; protein id: At1g61670.1          | 0.461  | 0.526  | 0.172  | 0.369  |
| A003278_01 | At1g24260 | MADS-box protein; protein id: At1g24260.1              | 0.082  | 0.033  | 0.017  | -0.379 |
| A003280_01 | At1g28060 | hypothetical protein; protein id: At1g28060.1          | 0.016  | 0.033  | NA     | -0.289 |
| A003286_01 | At1g19310 | expressed protein; protein id: At1g19310.1             | NA     | NA     | -0.33  | -0.91  |
| A003287_01 | At1g56505 | hypothetical protein; protein id: At1g56505.1          | -0.434 | -0.629 | -1.26  | -1.337 |
| A003291_01 | At1g58290 | glutamyl-tRNA reductase, putative; protein id: At1g5   | 0.001  | -0.198 | -0.645 | -0.407 |
| A003294_01 | At1g19570 | dehydroascorbate reductase, putative; protein id: At   | 0.648  | 0.636  | 0.513  | 0.57   |
| A003299_01 | At1g73885 | hypothetical protein; protein id: At1g73885.1          | -0.657 | -0.647 | -0.473 | -0.725 |

|            |           |                                                                           |        |    |        |        |        |
|------------|-----------|---------------------------------------------------------------------------|--------|----|--------|--------|--------|
| A003304_01 | At1g27520 | glycoside hydrolase family 47 family; protein id: At1g27520.1             | -0.671 | NA | NA     |        | -0.235 |
| A003311_01 | At1g55340 | unknown protein; protein id: At1g55340.1                                  | 0.296  | NA |        | 0.161  | 0.295  |
| A003317_01 | At1g27850 | transposon protein, putative; protein id: At1g27850.1                     | -0.461 | NA | NA     | NA     |        |
| A003329_01 | At1g63090 | unknown protein; protein id: At1g63090.1                                  | -0.806 |    | -0.415 | -0.615 | -0.522 |
| A003333_01 | At1g33690 | unknown protein; protein id: At1g33690.1                                  | -0.256 |    | 0.022  | NA     | 0.299  |
| A003337_01 | At1g52760 | putative lipase; protein id: At1g52760.1                                  | -0.976 |    | -1.416 | -0.914 | -1.013 |
| A003339_01 | At1g63050 | unknown protein; protein id: At1g63050.1                                  | 0.498  |    | 0.608  | 0.298  | 0.761  |
| A003351_01 | At1g77770 | unknown protein; protein id: At1g77770.1                                  | -0.889 |    | -0.814 | -0.473 | -0.447 |
| A003354_01 | At1g02840 | pre-mRNA splicing factor SF2 (SR1 protein); protein id: At1g02840.1       | -0.315 |    | 0.028  | -0.102 | 0.094  |
| A003359_01 | At1g30720 | FAD-linked oxidoreductase family; protein id: At1g30720.1                 | 1.064  |    | 1.103  | 0.714  | 0.466  |
| A003360_01 | At1g70600 | 60S ribosomal protein L27A; protein id: At1g70600.1                       | 0.785  |    | 0.557  | 0.889  | 0.469  |
| A003365_01 | At1g10750 | putative carboxyl-terminal peptidase; protein id: At1g10750.1             | -1.236 |    | -0.72  | -0.171 | -0.593 |
| A003366_01 | At1g11400 | expressed protein; protein id: At1g11400.1                                | 0.341  |    | 0.362  | 0.391  | -0.075 |
| A003367_01 | At1g67250 | expressed protein; protein id: At1g67250.1                                | 0.681  |    | 0.579  | 0.519  | 0.282  |
| A003370_01 | At1g09840 | shaggy-like protein kinase, kappa; protein id: At1g09840.1                | 0.056  |    | 0.277  | 0.288  | 0.117  |
| A003371_01 | At1g02650 | hypothetical protein; protein id: At1g02650.1                             | -0.192 |    | 0.29   | -0.06  | 0.33   |
| A003373_01 | At1g76010 | expressed protein; protein id: At1g76010.1                                | -0.681 |    | -0.066 | -0.626 | -1.227 |
| A003377_01 | At1g06400 | ras-related GTP-binding protein (RAB11D); protein id: At1g06400.1         | -0.61  |    | -0.571 | -0.096 | -0.304 |
| A003381_01 | At1g71120 | putative proline-rich APG protein; protein id: At1g71120.1                | -0.726 | NA | NA     | NA     |        |
| A003382_01 | At3g49490 | expressed protein; protein id: At3g49490.1                                | -0.408 |    | -0.684 | -0.546 | -0.288 |
| A003383_01 | At1g65930 | isocitrate dehydrogenase, putative; protein id: At1g65930.1               | 0.209  |    | 0.225  | 0.055  | 0.652  |
| A003385_01 | At1g09250 | bHLH protein; protein id: At1g09250.1                                     | -0.469 | NA |        | 0.5    | 0.328  |
| A003387_01 | At1g50450 | expressed protein; protein id: At1g50450.1                                | 0.192  |    | 0.288  | -0.029 | -0.406 |
| A003388_01 | At1g71080 | expressed protein; protein id: At1g71080.1                                | 0.089  |    | -0.086 | 0.291  | -0.031 |
| A003389_01 | At1g68560 | glycosyl hydrolase family 31 (alpha-xylosidase); protein id: At1g68560.1  | 1.059  |    | 0.916  | 0.585  | 0.746  |
| A003393_01 | At1g79610 | sodium/hydrogen exchanger; protein id: At1g79610.1                        | -0.836 |    | -0.617 | -0.288 | -0.261 |
| A003394_01 | At1g10740 | putative lipase; protein id: At1g10740.1                                  | -0.201 |    | -0.279 | -0.34  | -0.458 |
| A003395_01 | At1g19835 | unknown protein; protein id: At1g19835.1                                  | 0.083  |    | -0.214 | 0.123  | 0.684  |
| A003398_01 | At1g78890 | expressed protein; protein id: At1g78890.1                                | -0.425 |    | -0.231 | -0.161 | -0.694 |
| A003404_01 | At1g28230 | purine permease; protein id: At1g28230.1                                  | -0.813 | NA |        | -0.558 | -1.036 |
| A003405_01 | At1g21590 | hypothetical protein; protein id: At1g21590.1                             | -0.291 | NA |        | -0.361 | -0.476 |
| A003406_01 | At1g29390 | expressed protein; protein id: At1g29390.1                                | -0.265 |    | 0.045  | 0.063  | -0.806 |
| A003408_01 | At1g24180 | pyruvate dehydrogenase E1 alpha subunit; protein id: At1g24180.1          | -0.151 |    | 0.068  | NA     | 0.261  |
| A003409_01 | At1g21560 | hypothetical protein; protein id: At1g21560.1                             | 0.806  |    | 0.774  | 0.389  | 0.878  |
| A003410_01 | At1g30470 | unknown protein; protein id: At1g30470.1                                  | -0.175 |    | -0.086 | -0.237 | -0.26  |
| A003411_01 | At1g47710 | serpin, putative; protein id: At1g47710.1                                 | -0.381 |    | -0.567 | 0.316  | 0.364  |
| A003412_01 | At1g21460 | expressed protein; protein id: At1g21460.1                                | -0.464 |    | -0.83  | 0.058  | -0.126 |
| A003418_01 | At1g56570 | hypothetical protein; protein id: At1g56570.1                             | -0.538 |    | -0.092 | NA     | -0.789 |
| A003419_01 | At1g66240 | copper homeostasis factor, putative; protein id: At1g66240.1              | -0.574 |    | -0.358 | -0.047 | -0.76  |
| A003423_01 | At1g09610 | unknown protein; protein id: At1g09610.1                                  |        | NA | NA     | NA     | NA     |
| A003425_01 | At1g50570 | expressed protein; protein id: At1g50570.1                                | -0.656 |    | -0.898 | -0.294 | 0.063  |
| A003428_01 | At1g49880 | expressed protein; protein id: At1g49880.1                                | -0.492 | NA | NA     | NA     |        |
| A003431_01 | At1g06460 | heat shock protein, putative; protein id: At1g06460.1                     | -1.369 |    | -1.441 | -1.334 | -2.02  |
| A003433_01 | At1g06700 | protein kinase interactor, putative; protein id: At1g06700.1              | -0.488 | NA |        | -0.635 | -0.355 |
| A003434_01 | At1g15350 | expressed protein; protein id: At1g15350.1                                | -1.283 | NA |        | -1.223 | NA     |
| A003440_01 | At1g22200 | expressed protein; protein id: At1g22200.1                                | 0.113  |    | -0.154 | -0.001 | 0.152  |
| A003443_01 | At1g11060 | unknown protein; protein id: At1g11060.1                                  | -0.485 | NA | NA     |        | -0.603 |
| A003444_01 | At1g72190 | phosphoglycerate dehydrogenase, putative; protein id: At1g72190.1         | -0.315 | NA | NA     |        | 0.06   |
| A003446_01 | At1g80070 | splicing factor Prp8, putative; protein id: At1g80070.1                   | -0.386 |    | -0.231 | 0.189  | 0.321  |
| A003448_01 | At1g12760 | unknown protein; protein id: At1g12760.1                                  |        | NA | NA     | -0.584 | -1.131 |
| A003456_01 | At1g31830 | amino acid permease, putative; protein id: At1g31830.1                    | 0.051  | NA | NA     |        | 0.262  |
| A003458_01 | At1g06780 | expressed protein; protein id: At1g06780.1                                | -0.76  |    | -0.558 | -0.191 | -0.306 |
| A003460_01 | At1g77840 | eukaryotic initiation factor 5 (eIF-5), putative; protein id: At1g77840.1 | 0.338  |    | 0.188  | -0.077 | 0.398  |
| A003465_01 | At1g65320 | hypothetical protein; protein id: At1g65320.1                             | -0.177 | NA | NA     | NA     |        |
| A003467_01 | At1g19600 | ribokinase, putative; protein id: At1g19600.1                             | 0.07   |    | 0.208  | NA     | 0.046  |
| A003468_01 | At1g32130 | unknown protein; protein id: At1g32130.1                                  | -0.328 |    | -0.645 | -0.311 | -0.43  |
| A003470_01 | At1g65410 | ABC transporter family protein; protein id: At1g65410.1                   | -0.213 | NA |        | -0.469 | -0.142 |
| A003471_01 | At1g65420 | antigen receptor, putative; protein id: At1g65420.1                       | 0.062  |    | 0.231  | NA     | 0.027  |
| A003472_01 | At1g30510 | ferredoxin NADP oxidoreductase, putative; protein id: At1g30510.1         | 0.382  |    | 0.291  | 0.213  | 0.478  |
| A003475_01 | At1g80920 | J8-like protein; protein id: At1g80920.1                                  | -1.649 |    | -2.215 | -1.412 | -1.842 |
| A003478_01 | At1g34370 | zinc finger protein, putative; protein id: At1g34370.1                    | -0.432 |    | -0.52  | -0.656 | -0.465 |
| A003480_01 | At1g56660 | hypothetical protein; protein id: At1g56660.1                             | -0.601 | NA | NA     |        | -1.405 |
| A003483_01 | At1g79570 | hypothetical protein; protein id: At1g79570.1                             | -0.348 |    | -0.243 | -0.094 | -0.065 |
| A003486_01 | At1g76710 | unknown protein; protein id: At1g76710.1                                  | 0.799  |    | 0.538  | NA     | 0.848  |
| A003488_01 | At1g76730 | expressed protein; protein id: At1g76730.1                                | -0.335 |    | -0.364 | -0.571 | -0.568 |
| A003493_01 | At1g49850 | RING-H2 finger protein RHY1a; protein id: At1g49850.1                     | -0.723 | NA |        | -0.409 | -0.486 |
| A003497_01 | At1g22140 | expressed protein; protein id: At1g22140.1                                | -0.871 |    | -0.643 | -0.48  | -1.116 |
| A003500_01 | At1g68760 | putative mutT protein; protein id: At1g68760.1                            | 0.122  |    | 0.322  | 0.617  | 0.357  |

|            |           |                                                         |           |           |          |        |
|------------|-----------|---------------------------------------------------------|-----------|-----------|----------|--------|
| A003501_01 | At1g29990 | hydrophilic protein, putative; protein id: At1g29990.1  | 0.208     | 0.23      | 0.216    | -0.094 |
| A003503_01 | At1g22070 | bZIP transcription factor, TGA3; protein id: At1g220    | -0.626    | -0.506    | -0.722   | -0.996 |
| A003510_01 | At1g10140 | expressed protein; protein id: At1g10140.1              | -2.103    | -1.762    | -0.735   | -1.87  |
| A003512_01 | At1g12800 | heat shock factor protein hsf8, putative; protein id: A | 0.575     | 0.351     | -0.314   | 0.232  |
| A003513_01 | At1g69250 | NTF2-containing RNA-binding protein, putative; proi     | 0.43      | 0.311     | 0.411    | 0.688  |
| A003518_01 | At1g79380 | expressed protein; protein id: At1g79380.1              | -1.469    | -1.296    | -0.504   | -1.089 |
| A003522_01 | At1g71730 | unknown protein; protein id: At1g71730.1                | 0.169 NA  | NA        |          | -0.277 |
| A003523_01 | At1g07220 | hypothetical protein; protein id: At1g07220.1           | 0.824     | 0.984     | 0.771    | 1.305  |
| A003528_01 | At1g76520 | expressed protein; protein id: At1g76520.1              | -1.02 NA  |           | -0.571   | -0.814 |
| A003530_01 | At1g64950 | cytochrome p450, putative; protein id: At1g64950.1      | -1.221    | -0.975    | -0.667   | -0.642 |
| A003533_01 | At1g78140 | expressed protein; protein id: At1g78140.1              | -0.678    | -0.525    | -0.613   | -0.996 |
| A003535_01 | At1g56170 | transcription factor, putative; protein id: At1g56170.  | -0.063    | 0.391     | 0.807    | 0.711  |
| A003536_01 | At1g35490 | bZIP family transcription factor; protein id: At1g3549  | -0.63     | -0.902 NA |          | -1.017 |
| A003537_01 | At1g63800 | E2, ubiquitin-conjugating enzyme 5 (UBC5); protein      | -1.782    | -1.943    | -1.419   | -1.946 |
| A003538_01 | At1g03610 | expressed protein; protein id: At1g03610.1              | -1.394    | -1.638    | -1.112   | -1.252 |
| A003540_01 | At1g14420 | pectate lyase, putative; protein id: At1g14420.1        | -0.498    | -0.689 NA |          | -1.666 |
| A003544_01 | At1g16720 | unknown protein; protein id: At1g16720.1                | -0.829 NA |           | -1.312   | -0.989 |
| A003547_01 | At1g71790 | actin capping protein beta-2, putative; protein id: At  | 0.866     | 0.866     | 0.482    | 0.471  |
| A003553_01 | At1g15860 | unknown protein; protein id: At1g15860.1                | -0.607    | -0.692    | -0.389   | -0.453 |
| A003554_01 | At3g49430 | arginine/serine-rich splicing factor (atSRp34), putati  | 0.343     | 0.372     | 0.47     | 0.488  |
| A003555_01 | At1g13930 | expressed protein; protein id: At1g13930.1              | 0.059     | -0.269    | -0.507   | -0.867 |
| A003556_01 | At1g34000 | expressed protein; protein id: At1g34000.1              | -1.051    | -0.957    | -0.565   | -1.555 |
| A003560_01 | At1g77850 | auxin response factor, putative; protein id: At1g7785   | -0.596 NA | NA        |          | -0.785 |
| A003567_01 | At1g64660 | methionine/cystathionine gamma lyase, putative; pr      | -0.327    | 0.071     | -0.213   | -0.664 |
| A003574_01 | At1g79880 | RRM-containing protein; protein id: At1g79880.1         | -0.385    | -0.183    | -0.113   | -0.589 |
| A003576_01 | At1g04770 | hypothetical protein; protein id: At1g04770.1           | -0.784    | -0.912 NA |          | -1.435 |
| A003588_01 | At1g06960 | small nuclear ribonucleoprotein U2B, putative; prote    | 0.616     | 0.691     | 0.543    | 0.666  |
| A003599_01 | At1g68790 | putative nuclear matrix constituent protein 1 (NMCP     | 0.368     | 0.161 NA  |          | 0.115  |
| A003604_01 | At1g70610 | ABC transporter family protein; protein id: At1g7061    | -0.405    | -0.987    | -0.947   | -0.552 |
| A003606_01 | At1g70590 | expressed protein; protein id: At1g70590.1              | -0.975    | -0.972 NA |          | -0.717 |
| A003607_01 | At1g70740 | putative protein kinase; protein id: At1g70740.1        | -0.266 NA | NA        |          | -0.252 |
| A003608_01 | At1g70660 | E2, ubiquitin-conjugating enzyme, putative; protein i   | -0.656    | -0.353    | -0.422   | -0.726 |
| A003610_01 | At1g76450 | oxygen-evolving complex-23 related protein; protein     | 0.307     | 0.204     | -0.65    | -0.362 |
| A003614_01 | At1g33050 | unknown protein; protein id: At1g33050.1                | -1.125    | -1.533    | -1.331   | -1.16  |
| A003617_01 | At1g32930 | Avr9 elicitor response protein, putative; protein id: A | 0.882     | 0.52      | 0.617    | 1.077  |
| A003621_01 | At1g64105 | expressed protein; protein id: At1g64105.1              | -0.193    | -0.033    | 0.032    | -0.404 |
| A003628_01 | At1g12680 | calcium dependent protein kinase, putative; protein     | -0.601 NA | NA        |          | -0.315 |
| A003630_01 | At1g32310 | expressed protein; protein id: At1g32310.1              | 0.356     | 0.68      | 0.611 NA |        |
| A003633_01 | At1g14720 | xyloglucan endotransglycosylase (XTR2); protein id      | -0.132    | 0.007     | -0.274   | -0.309 |
| A003636_01 | At1g05840 | expressed protein; protein id: At1g05840.1              | -0.892 NA |           | -0.947   | -1.259 |
| A003637_01 | At1g16920 | GTP binding protein, putative; protein id: At1g16920    | 1.366     | 1.324     | 0.839    | 1.166  |
| A003641_01 | At1g18730 | unknown protein; protein id: At1g18730.1                | -0.497    | -0.127    | -1.094   | -0.921 |
| A003643_01 | At1g20830 | hypothetical protein; protein id: At1g20830.1           | -0.082 NA |           | -0.016   | 0.115  |
| A003647_01 | At1g72970 | expressed protein; protein id: At1g72970.1              | 2.012     | 1.545     | 1.355    | 2.361  |
| A003648_01 | At1g75340 | expressed protein; protein id: At1g75340.1              | 0.091 NA  | NA        |          | -0.496 |
| A003653_01 | At1g08130 | ligase I, putative; protein id: At1g08130.1             | 0.679     | 0.853     | 0.976    | 1.881  |
| A003655_01 | At1g06110 | F-box protein family; protein id: At1g06110.1           | -0.002    | 0.143     | 0.105    | 0.092  |
| A003656_01 | At1g74970 | ribosomal protein S9, putative; protein id: At1g7497    | 0.158     | 0.931     | 0.289    | 0.388  |
| A003657_01 | At1g06060 | expressed protein; protein id: At1g06060.1              | -0.006    | -0.281 NA |          | 0.037  |
| A003660_01 | At1g07770 | ribosomal protein S15; protein id: At1g07770.1          | 0.664     | 1.085     | 0.997    | 0.682  |
| A003664_01 | At1g01160 | expressed protein; protein id: At1g01160.1              | -0.305 NA |           | 0.202    | -0.178 |
| A003665_01 | At1g80650 | hypothetical protein; protein id: At1g80650.1           | -0.268    | -0.313    | -0.111   | -0.665 |
| A003667_01 | At1g05970 | hypothetical protein; protein id: At1g05970.1           | 0.143     | 0.544     | 0.428    | 0.448  |
| A003668_01 | At1g05940 | expressed protein; protein id: At1g05940.1              | -0.153    | -0.208    | -0.437   | -0.645 |
| A003671_01 | At1g13450 | DNA binding protein GT-1, putative; protein id: At1g    | -0.629 NA |           | -0.395   | -0.157 |
| A003672_01 | At1g70490 | putative ADP-ribosylation factor 1; protein id: At1g7   | 0.513     | 0.362     | 0.406    | 0.967  |
| A003673_01 | At1g16780 | vacuolar-type H+-translocating inorganic pyrophosph     | 1.039     | 0.969     | 0.491    | 0.937  |
| A003675_01 | At1g70520 | putative protein kinase; protein id: At1g70520.1        | -1.119    | -1.125    | -1.308   | -1.295 |
| A003676_01 | At1g75420 | unknown protein; protein id: At1g75420.1                | 0.227 NA  | NA        |          | 0.339  |
| A003678_01 | At1g64140 | hypothetical protein; protein id: At1g64140.1           | -0.367    | -0.625    | -0.227   | -0.526 |
| A003679_01 | At1g70480 | expressed protein; protein id: At1g70480.1              | 0.588     | 0.398     | 0.268    | 0.511  |
| A003681_01 | At1g69390 | expressed protein; protein id: At1g69390.1              | 0.251     | 0.324     | 0.089    | 0.039  |
| A003689_01 | At1g78920 | vacuolar-type H+-translocating inorganic pyrophosp      | 0.174     | 0.296     | 0.172    | 0.381  |
| A003690_01 | At1g59990 | DEAD/DEAH box RNA helicase protein, putative pu         | 1.172     | 1.184     | 0.703    | 1.273  |
| A003691_01 | At1g10900 | phosphatidylinositol-4-phosphate 5-kinase isolog; pi    | -1.018    | -0.84     | -0.921   | -0.151 |
| A003694_01 | At1g17880 | transcription factor, putative; protein id: At1g17880.  | 0.844     | 0.837     | 1.012    | 1.011  |
| A003695_01 | At1g79440 | succinic semialdehyde dehydrogenase (gabD), putat       | -0.167 NA | NA        |          | -0.276 |
| A003696_01 | At1g30540 | expressed protein; protein id: At1g30540.1              | -0.353    | -0.258    | -0.426   | -0.436 |



|            |           |                                                         |        |        |        |        |
|------------|-----------|---------------------------------------------------------|--------|--------|--------|--------|
| A003698_01 | At1g30520 | hypothetical protein; protein id: At1g30520.1           | 0.75   | 0.832  | 0.597  | 0.674  |
| A003703_01 | At1g48320 | hypothetical protein; protein id: At1g48320.1           | -2.318 | -1.953 | -1.22  | NA     |
| A003706_01 | At1g64460 | unknown protein; protein id: At1g64460.1                | -0.118 | NA     |        | 0.427  |
| A003710_01 | At1g69840 | unknown protein; protein id: At1g69840.1                | -0.465 | -0.688 | -0.517 | -0.703 |
| A003714_01 | At1g69640 | acid phosphatase, putative; protein id: At1g69640.1     | NA     |        | -0.295 | -0.709 |
| A003716_01 | At1g28400 | hypothetical protein; protein id: At1g28400.1           | 0.618  | -0.146 | 0.611  | 0.68   |
| A003719_01 | At1g67970 | putative heat shock transcription factor; protein id: A | -0.773 | NA     | NA     |        |
| A003720_01 | At1g72430 | expressed protein; protein id: At1g72430.1              | -1.157 | -1.094 | -0.708 | -1.897 |
| A003732_01 | At1g44170 | aldehyde dehydrogenase, putative; protein id: At1g4     | 0.47   | 0.502  | 0.492  | 1.113  |
| A003736_01 | At1g68230 | unknown protein; protein id: At1g68230.1                | -0.93  | NA     | -0.384 | -0.504 |
| A003737_01 | At1g68170 | MtN21-like protein; protein id: At1g68170.1             | -0.069 | NA     | -0.553 | -0.517 |
| A003743_01 | At1g51490 | glycosyl hydrolase family 1; protein id: At1g51490.1    | -0.362 | -0.338 | NA     |        |
| A003744_01 | At1g51590 | mannosyl-oligosaccharide alpha-1,2-mannosidase,         | 0.001  | -0.173 | NA     | 0.248  |
| A003750_01 | At1g47270 | F-box containing tubby family protein; protein id: At1  | -0.706 | -0.247 | -0.723 | -0.436 |
| A003753_01 | At1g32200 | glycerol-3-phosphate acyltransferase; protein id: At    | 0.302  | NA     | -0.181 | -0.143 |
| A003754_01 | At1g75980 | unknown protein; protein id: At1g75980.1                | 0.457  | 0.503  | 0.288  | 0.611  |
| A003755_01 | At1g50200 | alanine--tRNA ligase, putative; protein id: At1g5020    | -0.242 | -0.367 | -0.17  | 0.063  |
| A003756_01 | At1g76060 | unknown protein; protein id: At1g76060.1                | -0.044 | NA     |        | -0.344 |
| A003762_01 | At1g32090 | hypothetical protein; protein id: At1g32090.1           | -0.695 | -0.881 | -0.733 | -1.165 |
| A003767_01 | At1g31480 | shoot gravitropism 2; protein id: At1g31480.1           | -0.697 | -0.577 | -0.546 | -0.13  |
| A003773_01 | At1g17280 | putative ubiquitin-conjugating enzyme; protein id: At   | -0.502 | -0.578 | NA     | -0.329 |
| A003775_01 | At1g17160 | putative ribokinase; protein id: At1g17160.1            | 0.214  | 0.07   | 0.288  | 0.657  |
| A003789_01 | At1g05570 | callose synthase (CalS1), (1,3-beta-glucan synthase)    | -0.735 | -0.496 | NA     | 0.25   |
| A003800_01 | At1g07320 | expressed protein; protein id: At1g07320.1              | 0.878  | 1.116  | 0.387  | 0.12   |
| A003802_01 | At1g80420 | putative DNA repair protein; protein id: At1g80420.1    | -0.076 | -0.204 | -0.45  | -0.61  |
| A003803_01 | At1g08600 | unknown protein; protein id: At1g08600.1                | -0.128 | -0.277 | NA     | -0.299 |
| A003804_01 | At1g15960 | metal ion transporter, putative; protein id: At1g1596   | -1.705 | -1.118 | -1.35  | -0.61  |
| A003808_01 | At1g09850 | cysteine protease XBCP3; protein id: At1g09850.1        | 0.423  | 0.534  | -0.291 | -0.151 |
| A003809_01 | At1g09870 | expressed protein; protein id: At1g09870.1              | 0.221  | 0.314  | NA     | 0.294  |
| A003817_01 | At1g62280 | hypothetical protein; protein id: At1g62280.1           | 0.987  | 0.908  | 0.93   | 1.545  |
| A003820_01 | At1g65530 | hypothetical protein; protein id: At1g65530.1           | 0.33   | 0.408  | NA     | 0.105  |
| A003825_01 | At1g70100 | expressed protein; protein id: At1g70100.1              | 0.025  | -0.164 | 0.158  | 0.636  |
| A003826_01 | At1g55590 | F-box protein family; protein id: At1g55590.1           | -0.259 | NA     |        | -0.261 |
| A003827_01 | At1g55620 | expressed protein; protein id: At1g55620.1              | -0.175 | 0.186  | -0.711 | -0.39  |
| A003829_01 | At1g49710 | fucosyltransferase c3 protein, putative; protein id: A  | -0.584 | -0.601 | -0.213 | -0.029 |
| A003844_01 | At1g52040 | myosinase-binding protein homolog, putative; prote      | 2.062  | 1.605  | 1.339  | 2.54   |
| A003846_01 | At1g04190 | unknown protein; protein id: At1g04190.1                | 0.522  | 0.43   | 0.432  | 0.919  |
| A003849_01 | At1g79090 | expressed protein; protein id: At1g79090.1              | -0.067 | NA     | -0.778 | -0.287 |
| A003851_01 | xxxx      | b/t tRNA-Arg;protein id: At1g79240 and serine/thre      | -1.172 | -1.038 | -0.895 | -0.832 |
| A003854_01 | At1g79340 | hypothetical protein common family; protein id: At1g    | 0.238  | 0.056  | 0.015  | 0.075  |
| A003860_01 | At1g70350 | hypothetical protein; protein id: At1g70350.1           | 0.719  | 1.01   | 0.835  | 0.453  |
| A003861_01 | At1g70300 | potassium transporter, putative; protein id: At1g703    | -1.282 | NA     | NA     | NA     |
| A003863_01 | At1g53230 | flower development protein cycloidea (cyc3), putativ    | 0.861  | 1.074  | 0.72   | 1.158  |
| A003864_01 | At1g60160 | potassium transporter, putative; protein id: At1g601    | NA     |        | -1.408 | -2.02  |
| A003869_01 | At1g09180 | putative GTP-binding protein, SAR1B; protein id: At     | -1.221 | -1.148 | -0.385 | -0.913 |
| A003872_01 | At1g69570 | Dof zinc finger protein; protein id: At1g69570.1        | -1.723 | -2.047 | -0.672 | -0.726 |
| A003875_01 | At1g77140 | vacuolar protein sorting homolog; protein id: At1g77    | -0.426 | 0.002  | -0.216 | 0.165  |
| A003876_01 | At1g77130 | hypothetical protein; protein id: At1g77130.1           | -0.465 | -0.382 | -0.56  | -0.678 |
| A003885_01 | At1g78915 | unknown protein; protein id: At1g78915.1                | 0.216  | NA     | -0.306 | -0.239 |
| A003889_01 | At1g78680 | gamma glutamyl hydrolase, putative; protein id: At1     | -0.567 | NA     | -0.53  | -0.97  |
| A003898_01 | At1g23780 | expressed protein; protein id: At1g23780.1              | -0.499 | -0.419 | -0.193 | -0.626 |
| A003910_01 | At1g51980 | mitochondrial processing peptidase alpha subunit, p     | -0.204 | -0.038 | -0.096 | 0.044  |
| A003914_01 | At1g61780 | postsynaptic protein CRIP1, putative; protein id: At1   | -0.491 | -0.318 | 0.091  | -0.305 |
| A003915_01 | At1g31170 | expressed protein; protein id: At1g31170.1              | -0.943 | -0.846 | -0.706 | -1.506 |
| A003921_01 | At1g61570 | expressed protein; protein id: At1g61570.1              | 0.289  | 0.812  | 0.768  | 0.775  |
| A003925_01 | At1g54130 | RSH3 (RelA/SpoT homolog); protein id: At1g54130.        | -1.191 | -1.023 | -0.612 | -0.65  |
| A003926_01 | At1g03150 | expressed protein; protein id: At1g03150.1              | -0.198 | NA     | -0.073 | -0.55  |
| A003932_01 | At1g11790 | putative chloroplast prephenate dehydratase; protei     | 0.867  | 0.868  | 0.642  | 1.19   |
| A003933_01 | xxxx      | b/t hypothetical protein; protein id: At1g11760.1 and   | -0.465 | -0.645 | -1.751 | -2.22  |
| A003940_01 | At1g13000 | unknown protein; protein id: At1g13000.1                | -0.097 | NA     |        | -0.596 |
| A003947_01 | At1g10320 | splicing factor U2AF small subunit-related protein, p   | -0.399 | -0.261 | NA     | 0.26   |
| A003948_01 | At1g10360 | glutathione transferase, putative; protein id: At1g10   | -0.368 | -0.021 | 0.162  | -0.158 |
| A003952_01 | At1g16350 | putative inosine-5-monophosphate dehydrogenase;         | 0.801  | 0.782  | 0.696  | 1.2    |
| A003958_01 | At1g14200 | unknown protein; protein id: At1g14200.1                | -1.17  | NA     |        | -0.166 |
| A003959_01 | At1g13970 | hypothetical protein; protein id: At1g13970.1           | -0.311 | -0.842 | -1.526 | -1.046 |
| A003960_01 | At1g14130 | dioxygenase-like protein; protein id: At1g14130.1       | -2.353 | NA     | -1.645 | -1.616 |
| A003961_01 | At1g14140 | mitochondrial carrier protein family; protein id: At1g  | 0.346  | 0.655  | NA     | 0.603  |
| A003965_01 | At1g59910 | hypothetical protein; protein id: At1g59910.1           | -0.861 | -0.62  | NA     | -0.486 |

|            |           |                                                        |           |           |           |        |
|------------|-----------|--------------------------------------------------------|-----------|-----------|-----------|--------|
| A003968_01 | At1g15120 | putative ubiquinol--cytochrome-c reductase; protein    | 0.087     | 0.14      | 0.192     | -0.062 |
| A003969_01 | At1g15270 | expressed protein; protein id: At1g15270.1             | -0.763    | -0.649    | -0.189    | -0.484 |
| A003974_01 | At1g21790 | expressed protein; protein id: At1g21790.1             | -1.091 NA |           | -0.202    | -0.92  |
| A003979_01 | At1g47640 | expressed protein; protein id: At1g47640.1             | 0.303     | 0.738     | 0.289     | 0.364  |
| A003982_01 | At1g47410 | hypothetical protein; protein id: At1g47410.1          | -0.241    | -0.522 NA |           | NA     |
| A003984_01 | At1g27530 | expressed protein; protein id: At1g27530.1             | -0.33     | -0.526    | -0.18     | -0.648 |
| A003989_01 | At1g11210 | expressed protein; protein id: At1g11210.1             | -2.354    | -1.945    | -1.772 NA |        |
| A003991_01 | At1g74850 | hypothetical protein; protein id: At1g74850.1          | 0.238     | -0.048 NA |           | -0.161 |
| A003997_01 | At1g80170 | polygalacturonase, putative; protein id: At1g80170.1   | -0.549    | -0.516 NA |           | -0.639 |
| A004000_01 | At1g70900 | expressed protein; protein id: At1g70900.1             | -0.418    | -0.449    | 0.024     | 0.161  |
| A004003_01 | At1g52510 | hypothetical protein; protein id: At1g52510.1          | 0.049 NA  |           | NA        | -0.079 |
| A004018_01 | At1g80760 | nodulin-like protein; protein id: At1g80760.1          | -1.334    | -1.321    | -0.424    | -0.877 |
| A004026_01 | At1g54350 | ABC transporter family protein; protein id: At1g5435   | 0.015     | 0.17      | -0.355    | 0.112  |
| A004038_01 | At1g35190 | hyoscyamine 6-dioxygenase hydroxylase, putative;       | -1.327    | -0.585    | -0.536    | 0.234  |
| A004039_01 | xxxx      | b/t F-box protein family; protein id: At1g67190.1 anc  | -1.262    | -1.384    | -0.238    | -1.357 |
| A004044_01 | At1g45230 | similar to defective chloroplasts and leaves (DCL) p   | -0.25     | -0.108    | -0.379    | -0.409 |
| A004045_01 | At1g47056 | F-box protein family; protein id: At1g47056.1          | -0.845    | -0.797    | -0.563    | -0.346 |
| A004048_01 | At1g18470 | expressed protein; protein id: At1g18470.1             | -1.184    | -1.435    | -0.976    | -1.199 |
| A004058_01 | At1g16880 | expressed protein; protein id: At1g16880.1             | -0.608    | -0.623    | -0.328    | -0.412 |
| A004098_01 | At1g56290 | expressed protein; protein id: At1g56290.1             | 0.126     | 0.062 NA  |           | 0.368  |
| A004103_01 | At1g50840 | DNA polymerase A family protein, putative; protein i   | 0.182     | 0.357 NA  |           | 0.79   |
| A004107_01 | At1g26560 | glycosyl hydrolase family 1; protein id: At1g26560.1   | -1.194    | -0.914 NA |           | -0.503 |
| A004121_01 | At1g66580 | 60S ribosomal protein L10, putative; protein id: At1g  | 0.234     | 0.392     | 0.581     | 0.834  |
| A004122_01 | At1g66590 | expressed protein; protein id: At1g66590.1             | -0.007    | 0.151     | -0.086    | -0.378 |
| A004144_01 | At1g33230 | expressed protein; protein id: At1g33230.1             | -0.094    | -0.086    | 0.121     | 0.101  |
| A004145_01 | At4g01525 | hypothetical protein; protein id: At4g01525.1          | -0.363    | -0.377 NA |           | NA     |
| A004150_01 | At1g42540 | ligand-gated ion channel, putative; protein id: At1g4  | -0.358    | -0.373    | -0.472    | -0.317 |
| A004151_01 | At1g33110 | unknown protein; protein id: At1g33110.1               | -1.462    | -1.345 NA |           | -0.679 |
| A004152_01 | At1g53390 | ABC transporter family protein; protein id: At1g5339   | -0.6      | -0.522    | -0.851    | -0.667 |
| A004157_01 | At1g19400 | unknown protein; protein id: At1g19400.1               | -0.531    | -0.53     | -0.217    | -0.374 |
| A004165_01 | At1g01240 | expressed protein; protein id: At1g01240.1             | -1.895    | -2.143    | -1.4      | -1.979 |
| A004173_01 | At1g29800 | unknown protein; protein id: At1g29800.1               | -1.153    | -1.024    | -0.64     | -0.899 |
| A004175_01 | At1g68910 | unknown protein; protein id: At1g68910.1               | -0.369 NA |           | NA        | NA     |
| A004177_01 | At1g63180 | uridine diphosphate glucose epimerase, putative; pr    | -0.623 NA |           | NA        | -0.811 |
| A004181_01 | At1g33800 | expressed protein; protein id: At1g33800.1             | -1.189 NA |           | NA        | NA     |
| A004219_01 | At1g21350 | hypothetical protein; protein id: At1g21350.1          | 0.643     | 0.387     | -0.343    | -0.189 |
| A004221_01 | At1g49890 | expressed protein; protein id: At1g49890.1             | -0.014    | 0.098 NA  |           | 0.406  |
| A004223_01 | At1g09500 | putative cinnamyl alcohol dehydrogenase; protein ic NA |           | NA        | -1.665    | -2.635 |
| A004225_01 | At1g09440 | putative ser/thr protein kinase; protein id: At1g0944  | -0.591    | -0.85     | -0.576    | -0.273 |
| A004236_01 | At1g71500 | expressed protein; protein id: At1g71500.1             | -0.076 NA |           | -0.662    | -0.722 |
| A004241_01 | At1g74160 | unknown protein; protein id: At1g74160.1               | 0.103     | 0.141     | 0.339     | 0.454  |
| A004242_01 | At1g34030 | ribosomal protein S18, putative; protein id: At1g340   | 0.649     | 0.862     | 0.532     | 0.916  |
| A004243_01 | At1g26800 | expressed protein; protein id: At1g26800.1             | -2.121    | -2.234    | -0.727    | -1.688 |
| A004244_01 | At1g71240 | hypothetical protein; protein id: At1g71240.1          | -1.152    | -1.342    | -1.304    | -1.123 |
| A004253_01 | At1g11020 | expressed protein; protein id: At1g11020.1             | -0.303 NA |           | -0.183    | 0.319  |
| A004271_01 | At1g03590 | protein phosphatase 2C (PP2C); protein id: At1g03      | 0.137     | 0.014     | 0.19      | 0.303  |
| A004272_01 | At1g73630 | putative calmodulin; protein id: At1g73630.1           | -1.553    | -1.265    | -0.607    | -1.534 |
| A004276_01 | At1g03660 | unknown; protein id: At1g03660.1                       | -2.802 NA |           | -1.904    | -2.932 |
| A004281_01 | At1g03600 | photosystem II protein family; protein id: At1g03600   | 0.098     | -0.02     | 0.289     | 0.723  |
| A004284_01 | At1g63290 | putative D-ribulose-5-phosphate-3-epimerase; prote     | 1.782     | 1.333     | 0.94      | 1.134  |
| A004285_01 | At1g63270 | ABC transporter family protein; protein id: At1g6327   | -1.861    | -1.771    | -1.538    | -1.695 |
| A004288_01 | At1g66300 | unknown protein; protein id: At1g66300.1               | 0.077     | 0.207     | 0.252     | 0.364  |
| A004289_01 | At1g58300 | plastid heme oxygenase, putative; protein id: At1g5    | -1.235    | -1.097    | -0.472    | -0.31  |
| A004290_01 | At1g15830 | hypothetical protein; protein id: At1g15830.1          | -0.236    | -0.081    | 0.148     | -0.219 |
| A004300_01 | At1g13760 | hypothetical protein; protein id: At1g13760.1          | 0.471     | 0.078     | 0.26      | 0.62   |
| A004305_01 | At1g13670 | unknown protein; protein id: At1g13670.1               | -0.812    | -0.543    | -1.043    | -1.961 |
| A004306_01 | At1g52990 | hypothetical protein; protein id: At1g52990.1          | -1.423 NA |           | NA        | NA     |
| A004311_01 | At1g67560 | putative lipoxygenase; protein id: At1g67560.1         | -0.748 NA |           | -0.477    | -0.629 |
| A004313_01 | At1g35995 | mutator-like transposase; protein id: At1g35995.1      | -0.429    | -0.517    | -0.154    | -0.24  |
| A004314_01 | At1g35970 | hypothetical protein; protein id: At1g35970.1          | -3.872 NA |           | NA        | NA     |
| A004319_01 | At1g32490 | A.t. chromosome 1 BAC F24D7 genomic sequence           | 0.5       | 0.52      | 0.194     | 0.512  |
| A004320_01 | At1g32480 | NAD+ dependent isocitrate dehydrogenase subunit        | 1.628     | 0.971     | 0.67      | 2.205  |
| A004325_01 | At1g74640 | expressed protein; protein id: At1g74640.1             | 0.279     | 0.05      | 0.052     | 0.063  |
| A004335_01 | At1g68390 | hypothetical protein; protein id: At1g68390.1          | 0.607 NA  |           | 0.512     | 0.494  |
| A004343_01 | At1g80360 | putative aspartate aminotransferase; protein id: At1   | -0.423    | 0.348     | -0.022    | 0.135  |
| A004347_01 | At1g80570 | F-box protein family, AtFBL14; protein id: At1g8057    | -0.072    | -0.04     | -0.018    | 0.001  |
| A004349_01 | At1g70500 | polygalacturonase, putative; protein id: At1g70500.1   | -0.958    | -0.638    | -0.422    | 0.093  |
| A004350_01 | At1g80600 | putative acetylmornithine transaminase; protein id: At | -1.002    | -0.894    | -0.654    | -0.664 |

|            |           |                                                                   |        |        |        |        |
|------------|-----------|-------------------------------------------------------------------|--------|--------|--------|--------|
| A004359_01 | At1g49780 | hypothetical protein; protein id: At1g49780.1                     | -0.57  | NA     | -0.453 | -0.702 |
| A004362_01 | At1g73970 | unknown protein; protein id: At1g73970.1                          | -0.106 | -0.232 | NA     | -0.402 |
| A004378_01 | At1g07980 | expressed protein; protein id: At1g07980.1                        | 0.258  | -0.042 | -0.007 | -0.156 |
| A004382_01 | At1g08020 | hypothetical protein; protein id: At1g08020.1                     | 0.083  | 0.203  | NA     | 0.067  |
| A004383_01 | At1g35160 | 14-3-3 protein GF14 phi (grf4); protein id: At1g3516              | 0.266  | 0.1    | 0.267  | 0.591  |
| A004386_01 | At1g23740 | putative auxin-induced protein; protein id: At1g2374              | -0.483 | -0.617 | -0.503 | -0.606 |
| A004392_01 | At1g23180 | unknown protein; protein id: At1g23180.1                          | 0.304  | 0.564  | NA     | 0.09   |
| A004393_01 | At1g08820 | hypothetical protein; protein id: At1g08820.1                     | -0.289 | -0.501 | -0.223 | -0.143 |
| A004396_01 | At1g08780 | expressed protein; protein id: At1g08780.1                        | 0.407  | 0.611  | 0.29   | -0.307 |
| A004397_01 | At1g08700 | putative presenilin; protein id: At1g08700.1                      | 0.326  | 0.481  | 0.21   | 0.332  |
| A004398_01 | At1g69870 | putative peptide transporter; protein id: At1g69870.1             | -0.634 | -0.864 | -0.575 | -0.684 |
| A004404_01 | At1g66670 | ATP-dependent Clp protease proteolytic subunit (Cl                | -0.826 | -1.013 | -0.975 | -0.782 |
| A004406_01 | At1g05500 | Ca <sup>2+</sup> -dependent lipid-binding protein, putative; prot | 0.291  | NA     | NA     | 0.244  |
| A004407_01 | At1g56075 | elongation factor, putative; protein id: At1g56075.1              | 0.529  | 0.466  | 0.179  | 0.952  |
| A004408_01 | At1g49500 | expressed protein; protein id: At1g49500.1                        | -1.33  | NA     | -1.264 | -3.36  |
| A004413_01 | At1g19000 | myb family transcription factor; protein id: At1g1900             | -1.157 | -1.059 | -0.597 | -0.557 |
| A004417_01 | At1g01830 | expressed protein; protein id: At1g01830.1                        | -0.668 | -0.585 | -0.015 | -0.482 |
| A004424_01 | At1g06380 | hypothetical protein; protein id: At1g06380.1                     | 0.576  | 0.509  | 0.636  | 0.594  |
| A004425_01 | At1g73390 | hypothetical protein; protein id: At1g73390.1                     | -0.796 | -0.889 | NA     | -0.084 |
| A004426_01 | At1g04290 | expressed protein; protein id: At1g04290.1                        | -0.31  | -0.186 | 0.008  | -0.426 |
| A004429_01 | At1g53190 | unknown protein; protein id: At1g53190.1                          | -0.343 | -0.334 | -0.586 | -0.771 |
| A004431_01 | At1g08630 | expressed protein; protein id: At1g08630.1                        | -1.073 | -0.889 | -0.127 | -0.165 |
| A004434_01 | At1g31420 | leucine-rich repeat transmembrane protein kinase, p               | -0.098 | 0.004  | NA     | 0.256  |
| A004437_01 | At1g80440 | expressed protein; protein id: At1g80440.1                        | -3.017 | -2.855 | -1.494 | -1.758 |
| A004439_01 | At1g01650 | unknown protein; protein id: At1g01650.1                          | -0.491 | -0.622 | -0.132 | -0.521 |
| A004442_01 | At1g52080 | expressed protein; protein id: At1g52080.1                        | -2.232 | -1.794 | NA     | -0.446 |
| A004448_01 | At1g70700 | hypothetical protein; protein id: At1g70700.1                     | -0.887 | -0.312 | -0.615 | -0.758 |
| A004449_01 | At1g44750 | hypothetical protein; protein id: At1g44750.1                     | -0.401 | -0.213 | -0.008 | 0.449  |
| A004451_01 | At1g08580 | hypothetical protein; protein id: At1g08580.1                     | 0.522  | 0.498  | 0.514  | 0.103  |
| A004452_01 | At1g25280 | F-box containing tubby family protein; protein id: At1            | -0.083 | NA     | -0.127 | 0.117  |
| A004454_01 | At1g57720 | elongation factor 1B-gamma, putative (eEF-1B gam                  | 0.546  | 0.606  | 0.604  | 1.873  |
| A004456_01 | At1g05385 | expressed protein; protein id: At1g05385.1                        | 0.109  | 0.508  | -0.383 | -0.826 |
| A004458_01 | At1g52870 | expressed protein; protein id: At1g52870.2                        | -1.882 | -1.983 | -1.46  | -2.788 |
| A004461_01 | At1g51115 | unknown protein; protein id: At1g51115.1                          | 0.488  | 0.298  | -0.613 | -0.159 |
| A004462_01 | At1g68300 | expressed protein; protein id: At1g68300.1                        | -0.601 | 0.234  | -0.044 | -0.472 |
| A004464_01 | At1g17290 | alanine aminotransferase, putative; protein id: At1g              | -0.608 | -0.364 | -0.961 | -0.348 |
| A004466_01 | At1g19690 | expressed protein; protein id: At1g19690.1                        | 0.307  | NA     | 0.274  | 0.507  |
| A004467_01 | At1g05430 | expressed protein; protein id: At1g05430.1                        | NA     | NA     | 0.143  | -0.113 |
| A004468_01 | At1g69030 | hypothetical protein; protein id: At1g69030.1                     | 0.585  | 0.34   | 0.463  | 0.254  |
| A004469_01 | At1g08230 | hypothetical protein; protein id: At1g08230.1                     | 0.394  | 0.379  | 0.343  | 0.563  |
| A004470_01 | At1g19720 | DYW7 protein; protein id: At1g19720.1                             | -0.815 | -1.083 | -0.409 | -0.732 |
| A004472_01 | At1g12450 | hypothetical protein; protein id: At1g12450.1                     | NA     | NA     | -0.131 | -0.26  |
| A004474_01 | At1g13390 | unknown protein; protein id: At1g13390.1                          | NA     | NA     | -0.656 | -1.304 |
| A004481_01 | At1g79550 | phosphoglycerate kinase, putative; protein id: At1g7              | 0.397  | 0.381  | 0.557  | 0.84   |
| A004483_01 | At1g32080 | expressed protein; protein id: At1g32080.1                        | -0.102 | -0.107 | -0.395 | -0.237 |
| A004484_01 | At1g79670 | WAK-like kinase (WLK); protein id: At1g79670.1                    | -0.981 | -0.486 | NA     | -0.33  |
| A004488_01 | At1g73930 | unknown protein; protein id: At1g73930.1                          | 0.358  | 0.56   | NA     | 0.58   |
| A004489_01 | At1g07640 | Dof zinc finger protein; protein id: At1g07640.2                  | -0.624 | -0.596 | -0.117 | -0.156 |
| A004491_01 | At1g36980 | expressed protein; protein id: At1g36980.1                        | -1.302 | -0.897 | -0.593 | -1.045 |
| A004493_01 | xxxx      | b/t At1g72610.1 germin-like protein and At1g72630.                | -0.547 | NA     | NA     | -0.526 |
| A004494_01 | At1g19680 | unknown protein; protein id: At1g19680.1                          | -0.366 | -0.263 | -0.335 | -0.302 |
| A004495_01 | At1g68520 | CONSTANS B-box zinc finger family protein; proteir                | -1.849 | -1.731 | -1.214 | -1.847 |
| A004497_01 | At1g26650 | expressed protein; protein id: At1g26650.1                        | 0.767  | 0.596  | 0.337  | 0.821  |
| A004498_01 | At1g80910 | myrosinase precursor, putative; protein id: At1g809               | -0.259 | 0.163  | -0.078 | 0.454  |
| A004502_01 | At1g30590 | unknown protein; protein id: At1g30590.1                          | -0.179 | -0.352 | -0.218 | 0.422  |
| A004505_01 | At1g13380 | expressed protein; protein id: At1g13380.1                        | 0.347  | 0.448  | 0.3    | 0.448  |
| A004509_01 | At1g50600 | scarecrow-like protein; protein id: At1g50600.1                   | -0.968 | -1.028 | -0.656 | -0.646 |
| A004511_01 | At1g15740 | expressed protein; protein id: At1g15740.1                        | -1.692 | -1.953 | -0.784 | -0.863 |
| A004514_01 | At1g44575 | photosystem II 22kDa protein, putative; protein id: A             | 0.354  | 0.059  | -0.022 | 0.058  |
| A004515_01 | At1g60070 | gamma-adaptin, putative; protein id: At1g60070.1                  | 0.312  | NA     | 0.286  | 0.249  |
| A004519_01 | At1g54460 | expressed protein; protein id: At1g54460.1                        | -0.052 | -0.602 | -0.442 | -0.158 |
| A004520_01 | At1g03930 | putative protein kinase, ADK1; protein id: At1g0393               | 0.068  | -0.163 | -0.132 | 0.266  |
| A004522_01 | At1g73350 | hypothetical protein; protein id: At1g73350.1                     | -0.508 | NA     | NA     | -0.203 |
| A004523_01 | At1g64850 | expressed protein; protein id: At1g64850.1                        | -0.249 | -0.258 | -0.004 | -0.629 |
| A004524_01 | At1g64840 | hypothetical protein; protein id: At1g64840.1                     | -0.275 | NA     | NA     | 0.239  |
| A004526_01 | At1g64790 | hypothetical protein; protein id: At1g64790.1                     | 0.61   | 0.768  | 0.656  | 1.106  |
| A004527_01 | At1g64770 | expressed protein; protein id: At1g64770.1                        | -0.697 | -0.479 | -0.628 | -0.806 |
| A004528_01 | At1g08570 | putative thioredoxin; protein id: At1g08570.1                     | -1.245 | -1.135 | -0.281 | -0.554 |

|            |           |                                                                 |           |           |          |        |
|------------|-----------|-----------------------------------------------------------------|-----------|-----------|----------|--------|
| A004534_01 | At1g80460 | putative glycerol kinase; protein id: At1g80460.1               | -0.495    | -0.326    | -0.071   | -0.588 |
| A004537_01 | At1g55360 | unknown protein; protein id: At1g55360.1                        | 0.46      | 0.537     | 0.861    | 1.403  |
| A004541_01 | At1g55840 | polyphosphoinositide binding protein, putative; prote           | 0.289     | 0.186     | -0.053   | 0.656  |
| A004542_01 | At1g55810 | uracil phosphoribosyltransferase, putative; protein ic          | -1.168 NA |           | -1.047   | -1.044 |
| A004545_01 | At1g26670 | V-SNARE protein AtVT11b, putative; protein id: At1g             | -1.365    | -1.443    | -0.744   | -1.202 |
| A004548_01 | At1g78450 | expressed protein; protein id: At1g78450.1                      | -0.291    | -0.057    | -0.496   | -0.819 |
| A004549_01 | xxxx      | b/t hypothetical protein; protein id: At1g30670.1 and           | 0.746     | 0.808     | 0.457    | 1.002  |
| A004553_01 | At1g13560 | aminoalcoholphosphotransferase; protein id: At1g13              | 0.012     | 0.134     | 0.101    | 0.614  |
| A004557_01 | At1g09780 | putative 2,3-bisphosphoglycerate-independent phos               | 0.906     | 0.901     | 0.903    | 1.428  |
| A004558_01 | At1g12230 | expressed protein; protein id: At1g12230.1                      | 0.224     | 0.371     | 0.272    | 0.479  |
| A004559_01 | At1g78010 | GTPase, putative; protein id: At1g78010.1                       | -0.1 NA   | NA        |          | 0.068  |
| A004560_01 | At1g19140 | expressed protein; protein id: At1g19140.1                      | 0.554     | 0.282     | 0.519    | 0.717  |
| A004576_01 | At1g19120 | expressed protein; protein id: At1g19120.1                      | 0.538     | 0.391     | 0.407    | 0.272  |
| A004577_01 | At1g05380 | hypothetical protein; protein id: At1g05380.1                   | -0.525    | -0.444 NA |          | 0.032  |
| A004578_01 | xxxx      | b/t hypothetical protein; protein id: At1g62305.1 and           | -0.472 NA | NA        |          | -0.458 |
| A004582_01 | At1g22300 | 14-3-3 protein GF14 epsilon (grf10); protein id: At1g           | 0.568     | 0.372     | 0.59     | 0.534  |
| A004587_01 | At1g78670 | gamma glutamyl hydrolase, putative; protein id: At1             | -2.968    | -3.288    | -2.245   | -3.437 |
| A004588_01 | At1g67920 | expressed protein; protein id: At1g67920.1                      | -3.048 NA |           | -2.31 NA |        |
| A004593_01 | At1g64430 | unknown protein; protein id: At1g64430.1                        | 0.107     | -0.112    | -0.286   | -0.016 |
| A004594_01 | At1g70230 | unknown protein; protein id: At1g70230.1                        | -0.503    | 0.328     | -0.255   | 0.113  |
| A004596_01 | At1g68070 | putative RING zinc finger protein; protein id: At1g68           | -0.183    | -0.037    | 0.132    | 0.253  |
| A004597_01 | At1g23390 | Kelch repeat containing F-box protein family; proteir           | -2.094    | -2.063    | -1.086   | -1.691 |
| A004598_01 | At1g28200 | FH protein interacting protein FIP1; protein id: At1g2          | -0.513    | -0.727    | -0.299   | -0.397 |
| A004599_01 | At1g14570 | expressed protein; protein id: At1g14570.1                      | -0.28     | -0.432    | -0.076   | 0.072  |
| A004602_01 | At1g27970 | nuclear transport factor 2, putative; protein id: At1g2         | 0.023     | -0.193    | 0.085    | -0.479 |
| A004603_01 | At1g79600 | expressed protein; protein id: At1g79600.1                      | -1.395    | -1.126    | -0.898   | -1.293 |
| A004604_01 | At1g05100 | putative NPK1-related MAP kinase; protein id: At1g              | -0.994    | -0.936 NA | NA       |        |
| A004609_01 | At1g10130 | calcium-transporting ATPase 3, endoplasmic reticul              | -0.182    | 0.219 NA  |          | 0.232  |
| A004610_01 | At1g12270 | hypothetical protein; protein id: At1g12270.1                   | 0.49      | 0.328     | 0.127    | 0.423  |
| A004612_01 | At1g67860 | expressed protein; protein id: At1g67860.1                      | -4.086    | -4.043    | -2.528   | -3.429 |
| A004615_01 | At1g61690 | hypothetical protein; protein id: At1g61690.1                   | -0.205    | -0.401 NA |          | -0.189 |
| A004616_01 | At1g01990 | expressed protein; protein id: At1g01990.1                      | -0.489    | -0.174    | -0.415   | -1.033 |
| A004617_01 | At1g79730 | unknown protein; protein id: At1g79730.1                        | 0.01      | 0.193     | 0.204    | -0.137 |
| A004618_01 | At1g11260 | glucose transporter; protein id: At1g11260.1                    | -2.513    | -2.129    | -1.115   | -1.931 |
| A004619_01 | At1g57680 | hypothetical protein; protein id: At1g57680.1                   | -0.467 NA |           | -0.422   | -0.367 |
| A004620_01 | At1g76850 | unknown protein; protein id: At1g76850.1                        | 0.279     | 0.138 NA  | NA       |        |
| A004622_01 | At1g44970 | peroxidase, putative; protein id: At1g44970.1                   | 1.895     | 1.287     | 1.486    | 2.436  |
| A004623_01 | At1g48790 | expressed protein; protein id: At1g48790.1                      | -0.302    | -0.501    | -0.482   | -0.306 |
| A004629_01 | At1g24370 | hypothetical protein; protein id: At1g24370.1                   | 0.443     | 0.166     | 0.417    | 0.689  |
| A004630_01 | At1g32990 | ribosomal protein L11, putative; protein id: At1g3299           | 0.72      | 0.566     | 0.089    | 0.438  |
| A004634_01 | At1g01720 | NAC domain protein, putative; protein id: At1g01720             | -2.537    | -2.163    | -1.207   | -0.925 |
| A004635_01 | At1g06840 | leucine-rich repeat transmembrane protein kinase, $\zeta$       | -0.312 NA | NA        | NA       |        |
| A004636_01 | At1g28540 | expressed protein; protein id: At1g28540.1                      | -0.454    | -0.232    | -0.236   | -1.012 |
| A004637_01 | At1g34430 | dihydrolipoamide S-acetyltransferase, putative; prot            | 0.787     | 1.166     | 0.546    | 0.932  |
| A004644_01 | At1g11430 | DAG protein, putative; protein id: At1g11430.1                  | 0.27      | 0.331     | 0.052    | -0.244 |
| A004645_01 | At1g15750 | expressed protein; protein id: At1g15750.1                      | -0.27     | -0.545    | -0.088   | -0.246 |
| A004646_01 | At1g19730 | thioredoxin; protein id: At1g19730.1                            | 0.519     | 0.565     | 0.308    | -0.02  |
| A004649_01 | At1g08370 | expressed protein; protein id: At1g08370.1                      | -0.463    | -0.115    | 0.128    | 0.261  |
| A004650_01 | At1g71820 | expressed protein; protein id: At1g71820.1                      | 0.507     | 0.358     | -0.033   | 0.145  |
| A004652_01 | At1g67830 | F12A21.4; protein id: At1g67830.1                               | 0.874     | 1.132     | 0.956    | 1.152  |
| A004653_01 | At1g09960 | putative sucrose/H <sup>+</sup> symporter; protein id: At1g0996 | 0.137 NA  |           | 0.281    | 0.501  |
| A004656_01 | At1g53840 | pectinesterase family; protein id: At1g53840.1                  | -0.052    | 0.048     | -0.354   | -0.643 |
| A004657_01 | At1g63640 | kinesin-related protein; protein id: At1g63640.1                | 0.614     | 0.485     | 0.489    | 1.064  |
| A004659_01 | At1g14690 | hypothetical protein; protein id: At1g14690.1                   | -0.483    | -0.609    | -0.479   | -0.563 |
| A004664_01 | At1g28100 | unknown protein; protein id: At1g28100.1                        | -0.555    | -0.482    | -0.584   | -0.976 |
| A004669_01 | At1g52230 | photosystem I subunit VI precursor; protein id: At1g            | 0.101     | -0.006    | -0.162   | -0.478 |
| A004670_01 | At1g27430 | unknown protein; protein id: At1g27430.1                        | -0.48     | -0.477 NA |          | -0.528 |
| A004671_01 | At1g50120 | hypothetical protein; protein id: At1g50120.1                   | 0.221     | 0.249     | 0.202    | 0.449  |
| A004678_01 | At1g09330 | expressed protein; protein id: At1g09330.1                      | 0.049     | 0.171     | 0.226    | 0.217  |
| A004680_01 | At1g68590 | expressed protein; protein id: At1g68590.1                      | 0.656     | 0.51      | 0.269    | -0.211 |
| A004682_01 | At1g09970 | leucine-rich repeat transmembrane protein kinase, $\zeta$       | -0.836    | -1.046    | -0.67    | -0.934 |
| A004683_01 | At1g14610 | valyl-tRNA synthetase, putative; protein id: At1g146            | 0.532     | 0.379     | 0.375    | 0.521  |
| A004684_01 | At1g08830 | copper/zinc superoxidase dismutase (CSD1); protei               | 1.347     | 1.005     | 1.248    | 1.46   |
| A004688_01 | At1g78620 | expressed protein; protein id: At1g78620.1                      | -0.132    | -0.187    | -0.222   | -0.398 |
| A004689_01 | At1g55260 | expressed protein; protein id: At1g55260.1                      | 0.935     | 0.854     | 0.679    | 0.476  |
| A004695_01 | At1g43690 | unknown protein; protein id: At1g43690.1                        | 0.12      | 0.145     | 0.145    | 0.37   |
| A004696_01 | At1g26150 | Pto kinase interactor, putative; protein id: At1g2615           | 0.421     | 0.124     | 0.331    | 0.678  |
| A004701_01 | At1g48150 | MADS-box protein; protein id: At1g48150.1                       | -0.758    | 0.513 NA  |          | -0.07  |

|            |           |                                                                               |        |        |        |        |
|------------|-----------|-------------------------------------------------------------------------------|--------|--------|--------|--------|
| A004704_01 | At1g28330 | dormancy-associated protein, putative; protein id: A                          | -1.964 | -1.449 | -1.307 | -2.546 |
| A004705_01 | At1g04440 | putative casein kinase I; protein id: At1g04440.1                             | -0.936 | -0.817 | -0.755 | -1.228 |
| A004714_01 | At1g79390 | expressed protein; protein id: At1g79390.1                                    | 0.72   | 0.731  | 0.84   | 0.528  |
| A004716_01 | At1g06470 | integral membrane protein, putative; protein id: At1g06470.1                  | NA     | NA     | -0.306 | -0.352 |
| A004717_01 | At1g62600 | similar to flavin-containing monooxygenase 3 (sp P08611 F08611.1)             | -0.599 | -0.514 | -0.162 | -0.617 |
| A004722_01 | At1g62180 | 5'-adenylylphosphosulfate reductase, putative; protein id: At1g62180.1        | -0.712 | -0.544 | -0.454 | -0.184 |
| A004725_01 | At1g57870 | protein kinase, putative; protein id: At1g57870.1                             | -0.254 | -0.01  | NA     | -0.104 |
| A004727_01 | At1g45688 | expressed protein; protein id: At1g45688.1                                    | 0.352  | 0.404  | 0.383  | 0.229  |
| A004728_01 | At1g44100 | amino acid permease, putative; protein id: At1g44100.1                        | -1.128 | -1.153 | -0.613 | -0.426 |
| A004735_01 | At1g68580 | unknown protein; protein id: At1g68580.1                                      | -1.074 | -1.006 | -1.377 | -1.263 |
| A004736_01 | At1g79970 | expressed protein; protein id: At1g79970.1                                    | -0.345 | 0.313  | -0.285 | -0.546 |
| A004738_01 | At1g23190 | putative phosphoglucomutase; protein id: At1g23190.1                          | 0.284  | 0.223  | 0.346  | 0.921  |
| A004739_01 | At1g14460 | hypothetical protein; protein id: At1g14460.1                                 | 0.464  | NA     | NA     | 0.924  |
| A004740_01 | At1g32150 | G-Box binding protein, putative; protein id: At1g32150.1                      | -0.185 | NA     | NA     | NA     |
| A004743_01 | At1g75200 | unknown protein; protein id: At1g75200.1                                      | 0.601  | 0.812  | 0.449  | 0.719  |
| A004744_01 | At1g56330 | GTP-binding protein (SAR1B); protein id: At1g56330.1                          | 0.829  | 0.638  | 0.824  | 0.815  |
| A004747_01 | At1g14270 | expressed protein; protein id: At1g14270.1                                    | 0.03   | 0.072  | 0.234  | -0.015 |
| A004748_01 | At1g44770 | unknown protein; protein id: At1g44770.1                                      | -1.006 | -1.258 | -0.554 | -0.353 |
| A004752_01 | At1g10570 | putative protein-tyrosine phosphatase 2; protein id: At1g10570.1              | -0.076 | -0.363 | -0.04  | 0.627  |
| A004754_01 | At1g16710 | unknown protein; protein id: At1g16710.1                                      | -0.541 | -0.705 | NA     | -0.078 |
| A004757_01 | At1g71780 | expressed protein; protein id: At1g71780.1                                    | 0.023  | NA     | 0.386  | 0.241  |
| A004759_01 | At1g16740 | ribosomal protein L20, putative; protein id: At1g16740.1                      | 0.582  | 0.676  | 0.534  | 0.308  |
| A004762_01 | At1g18210 | calcium-binding protein, putative; protein id: At1g18210.1                    | -0.237 | 0.001  | 0.349  | 0.022  |
| A004766_01 | At1g64355 | unknown protein; protein id: At1g64355.1                                      | 0.009  | 0.062  | 0.099  | 0.009  |
| A004768_01 | At1g10510 | expressed protein; protein id: At1g10510.1                                    | 0.37   | 0.242  | -0.008 | 0.1    |
| A004769_01 | At1g66200 | glutamine synthetase, putative; protein id: At1g66200.1                       | -1.192 | -1.137 | -0.624 | -0.342 |
| A004772_01 | At1g13060 | 20S proteasome beta subunit E1 (PBE1); protein id: At1g13060.1                | 0.155  | 0.164  | 0.443  | 0.506  |
| A004774_01 | At1g04970 | expressed protein; protein id: At1g04970.1                                    | -1.076 | -1.538 | -1.164 | -1.026 |
| A004777_01 | At1g51700 | Dof zinc finger protein; protein id: At1g51700.1                              | -0.583 | -0.419 | -0.268 | -0.594 |
| A004789_01 | At1g48170 | expressed protein; protein id: At1g48170.1                                    | 0.189  | 0.47   | 0.313  | 0.273  |
| A004792_01 | At1g19800 | hypothetical protein; protein id: At1g19800.1                                 | 0.22   | 0.187  | 0.209  | 0.669  |
| A004795_01 | At1g42430 | unknown protein; protein id: At1g42430.1                                      | 0.338  | 0.471  | NA     | 0.246  |
| A004799_01 | At1g15140 | expressed protein; protein id: At1g15140.1                                    | 0.389  | 0.474  | 0.062  | -0.044 |
| A004801_01 | At1g47490 | RNA binding protein 47 (RBP47), putative; protein id: At1g47490.1             | 0.022  | 0.114  | 0.114  | 0.572  |
| A004804_01 | At1g66530 | arginyl-tRNA synthetase; protein id: At1g66530.1                              | 0.339  | 0.532  | 0.459  | 1.091  |
| A004805_01 | At1g72370 | putative 40S ribosomal protein SA (laminin receptor); protein id: At1g72370.1 | 0.588  | 0.701  | 0.366  | 0.631  |
| A004810_01 | At1g67730 | expressed protein; protein id: At1g67730.1                                    | 0.266  | 0.087  | 0.521  | 0.689  |
| A004815_01 | At1g49740 | expressed protein; protein id: At1g49740.1                                    | -0.914 | -1.049 | -0.742 | -0.573 |
| A004820_01 | At1g18080 | G-protein beta family; protein id: At1g18080.1                                | 0.7    | 0.633  | 0.714  | 1.321  |
| A004825_01 | At1g74960 | 3-ketoacyl-ACP synthase, putative; protein id: At1g74960.1                    | 0.532  | 0.261  | -0.127 | 0.242  |
| A004828_01 | At1g59580 | expressed protein; protein id: At1g59580.1                                    | -0.24  | NA     | -0.332 | -0.086 |
| A004830_01 | At1g71980 | unknown protein; protein id: At1g71980.1                                      | -0.648 | NA     | NA     | -0.749 |
| A004837_01 | At1g79050 | replicase, putative; protein id: At1g79050.1                                  | 0.256  | 0.115  | -0.12  | -0.101 |
| A004839_01 | At1g32210 | defender against cell death protein, putative; protein id: At1g32210.1        | 0.762  | 0.729  | 0.565  | 0.497  |
| A004842_01 | At1g14400 | E2, ubiquitin-conjugating enzyme 1 (UBC1); protein id: At1g14400.1            | -0.322 | -0.562 | -0.014 | 0.118  |
| A004843_01 | At1g05805 | bHLH protein; protein id: At1g05805.1                                         | -1.009 | -0.994 | -1.502 | -1.717 |
| A004846_01 | At1g07570 | protein kinase APK1A; protein id: At1g07570.1                                 | 0.465  | NA     | 0.814  | 1.238  |
| A004848_01 | At1g23090 | putative sulphate transporter protein; protein id: At1g23090.1                | NA     | NA     | -0.815 | -1.073 |
| A004853_01 | At1g18800 | expressed protein; protein id: At1g18800.1                                    | 0.679  | 0.584  | 0.6    | 0.966  |
| A004859_01 | At1g66760 | MATE efflux family protein, putative; protein id: At1g66760.1                 | NA     | NA     | -1.109 | -1.781 |
| A004860_01 | At1g01140 | serine threonine kinase, putative; protein id: At1g01140.1                    | -1.278 | -1.091 | -0.602 | -0.286 |
| A004862_01 | At1g16470 | 20S proteasome alpha subunit B (PAB1); protein id: At1g16470.1                | -0.224 | 0.107  | 0.279  | 0.281  |
| A004863_01 | At1g47250 | 20S proteasome alpha subunit F2 (PAF2); protein id: At1g47250.1               | 0.452  | 0.614  | 0.522  | 0.638  |
| A004866_01 | At1g71860 | protein tyrosine phosphatase; protein id: At1g71860.1                         | 0.025  | -0.434 | 0.006  | 0.465  |
| A004867_01 | At1g45150 | hypothetical protein; protein id: At1g45150.1                                 | -0.909 | -0.499 | -1.024 | -1.294 |
| A004882_01 | At1g17540 | receptor-like serine threonine kinase, putative; protein id: At1g17540.1      | -0.644 | -0.599 | NA     | NA     |
| A004883_01 | At1g11680 | putative obtusifoliol 14-alpha demethylase; protein id: At1g11680.1           | 0.256  | 0.374  | 0.419  | 1.056  |
| A004885_01 | At1g30130 | expressed protein; protein id: At1g30130.1                                    | -0.009 | -0.131 | 0.107  | 0.166  |
| A004887_01 | At1g02410 | hypothetical protein; protein id: At1g02410.1                                 | -0.091 | 0.102  | 0.145  | 0.552  |
| A004889_01 | At1g58080 | ATP phosphoribosyl transferase; protein id: At1g58080.1                       | 0.097  | 0.541  | 0.326  | 0.377  |
| A004891_01 | At1g04860 | ubiquitin-specific protease 2 (UBP2); protein id: At1g04860.1                 | -0.278 | -0.266 | -0.422 | -0.565 |
| A004894_01 | At1g53160 | transcription factor, putative; protein id: At1g53160.1                       | -0.099 | -0.109 | 0.108  | -0.117 |
| A004896_01 | At1g09570 | putative phytochrome A; protein id: At1g09570.1                               | -1.004 | -0.927 | -0.748 | -1.113 |
| A004901_01 | At1g61660 | expressed protein; protein id: At1g61660.1                                    | NA     | NA     | NA     | -1.42  |
| A004903_01 | At1g17640 | RRM-containing RNA-binding protein, putative; protein id: At1g17640.1         | -0.607 | -0.094 | -0.14  | -0.584 |
| A004908_01 | At1g29350 | unknown protein; protein id: At1g29350.1                                      | 0.089  | NA     | -0.152 | -0.293 |
| A004910_01 | At1g75330 | ornithine carbamoyltransferase precursor; protein id: At1g75330.1             | 0.741  | 0.584  | 0.621  | 0.669  |
| A004915_01 | At1g60140 | trehalose-6-phosphate synthase, putative; protein id: At1g60140.1             | -1.677 | -1.87  | -1.374 | -1.811 |

|            |           |                                                            |        |    |        |        |        |
|------------|-----------|------------------------------------------------------------|--------|----|--------|--------|--------|
| A004916_01 | At1g17440 | expressed protein; protein id: At1g17440.1                 | -0.428 | NA | NA     |        | -0.874 |
| A004918_01 | At1g66820 | expressed protein; protein id: At1g66820.1                 | 0.163  |    | 0.48   | 0.204  | -0.772 |
| A004921_01 | At1g08920 | putative sugar transport protein, ERD6; protein id: A NA   |        | NA |        | -0.994 | -1.577 |
| A004922_01 | At1g22660 | putative tRNA adenylyltransferase; protein id: At1g2       | 0.408  |    | 0.524  | 0.418  | 0.75   |
| A004927_01 | At3g49390 | RNA-binding protein, putative; protein id: At3g49390       | 0.754  |    | 0.853  | 0.775  | 1.19   |
| A004931_01 | At1g21000 | expressed protein; protein id: At1g21000.1                 | -3.001 |    | -3.135 | -1.387 | -2.084 |
| A004932_01 | At1g02560 | ATP-dependent Clp protease proteolytic subunit (Cl         | -0.432 |    | -0.754 | -0.585 | 0.348  |
| A004934_01 | At1g49670 | ARP protein, putative; protein id: At1g49670.1             | -0.839 |    | -0.926 | -0.533 | -0.425 |
| A004941_01 | At3g51830 | putative transmembrane protein G5p; protein id: At3        | -1.061 |    | -0.621 | -0.36  | -0.709 |
| A004944_01 | At1g09415 | expressed protein; protein id: At1g09415.1                 | -0.673 |    | -0.394 | -0.848 | -0.51  |
| A004948_01 | At5g28500 | unknown protein                                            | 0.544  |    | 0.5    | 0.127  | 0.277  |
| A004962_01 | At1g60710 | auxin-induced protein, putative; protein id: At1g6071      | -0.247 |    | -0.177 | -0.312 | 0.102  |
| A004978_01 | At5g04340 | putative c2h2 zinc finger transcription factor; protein NA |        | NA |        | NA     | NA     |
| A004994_01 | At1g08510 | acyl-(acyl carrier protein) thioesterase, putative; pro    | -1.306 |    | -0.94  | -0.52  | -0.229 |
| A005002_01 | At5g26707 | glutamyl-tRNA synthetase; protein id: At5g26707.1          | 1.001  |    | 0.726  | 0.484  | 1.033  |
| A005005_01 | At5g20290 | putative protein; protein id: At5g20290.1                  | 1.133  |    | 0.677  | 0.779  | 1.246  |
| A005009_01 | xxxx      | b/t unknown protein; protein id: At1g49030.1 and un NA     |        |    | -1.177 | -1.112 | -1.551 |
| A005012_01 | At4g15920 | cytochrome c oxidoreductase like protein; protein id       | 1.492  |    | 1.357  | 0.461  | 0.644  |
| A005018_01 | At5g20910 | ABI3-interacting protein 2; protein id: At5g20910.1        | -0.839 |    | -0.275 | -0.416 | -0.028 |
| A005022_01 | At5g25940 | nodulin - like protein; protein id: At5g25940.1            | -0.144 |    | -0.053 | 0.25   | -0.555 |
| A005023_01 | At5g26742 | similar to RNA helicase, 3' partial; protein id: At5g26    | 0.224  |    | 0.145  | -0.609 | -0.724 |
| A005029_01 | At2g46505 | expressed protein; protein id: At2g46505.1                 | 0.615  |    | 0.55   | 0.798  | 1.26   |
| A005042_01 | At4g15760 | monooxygenase 1 (MO1), putative; protein id: At4g NA       |        | NA |        | -2.347 | -3.927 |
| A005048_01 | At1g04970 | expressed protein; protein id: At1g04970.1                 | -1.395 |    | -1.017 | -1.174 | -0.654 |
| A005065_01 | At1g65720 | expressed protein; protein id: At1g65720.1                 | -0.485 |    | -0.608 | -0.241 | -0.18  |
| A005067_01 | At1g75660 | Dhp1-like protein; protein id: At1g75660.1                 | -0.256 |    | -0.388 | NA     | -0.232 |
| A005068_01 | At5g33320 | phosphate/phosphoenolpyruvate translocator precu           | 0.617  |    | 0.621  | 0.414  | 0.605  |
| A005069_01 | At4g39660 | alanine:glyoxylate aminotransferase 2 homolog protei       | 0.409  |    | 0.492  | 0.663  | 1.421  |
| A005075_01 | At1g23940 | gamma-adaptin, putative; protein id: At1g23940.1           | 1.271  |    | 1.001  | 1.123  | 1.72   |
| A005084_01 | At1g02130 | GTP-binding protein, ara-5; protein id: At1g02130.1        | -0.437 |    | -0.377 | -0.14  | -0.326 |
| A005086_01 | At1g22930 | unknown protein; protein id: At1g22930.1                   | -1.895 |    | -1.975 | -1.475 | -2.008 |
| A005093_01 | At1g02140 | Mago Nashi-like protein; protein id: At1g02140.1           | -0.26  |    | 0.252  | 0.454  | 0.511  |
| A005095_01 | At1g75510 | transcription initiation factor, putative; protein id: At1 | -0.192 | NA |        | 0.219  | 0.079  |
| A005097_01 | At3g51840 | acyl-coA dehydrogenase; protein id: At3g51840.1            | -1.262 |    | -1.451 | -1.205 | -0.702 |
| A005122_01 | At5g20350 | ankyrin-repeat protein; protein id: At5g20350.1            | -0.297 |    | -0.353 | -0.552 | -0.334 |
| A005126_01 | At5g20990 | molybdopterin biosynthesis CNX1 protein; protein ic        | 0.143  | NA |        | -0.768 | -0.672 |
| A005129_01 | At5g24800 | bZIP protein, G/HBF-1-related; protein id: At5g2480        | -0.622 |    | -0.95  | -0.575 | -1.174 |
| A005132_01 | At5g19900 | putative protein; protein id: At5g19900.1                  | -0.122 |    | -0.303 | -0.126 | 0.17   |
| A005145_01 | At1g77490 | thylakoid-bound ascorbate peroxidase, putative (tAF        | 0.68   |    | 0.704  | -0.084 | -0.382 |
| A005146_01 | At4g08390 | stromal ascorbate peroxidase, putative (sAPX); prot        | 0.896  |    | 0.829  | 0.301  | 0.544  |
| A005155_01 | At1g28660 | expressed protein; protein id: At1g28660.1                 | -3.353 |    | -3.391 | NA     | -1.293 |
| A005160_01 | At4g21960 | peroxidase, putative; protein id: At4g21960.1              | -0.044 |    | 0.116  | 0.277  | 1.074  |
| A005162_01 | At5g10450 | 14-3-3 protein GF14 lambda (grf6/AFT1); protein id:        | -0.953 |    | -1.199 | -0.471 | -0.171 |
| A005163_01 | At5g01530 | light-harvesting chlorophyll a/b binding protein; prote    | -0.659 |    | -0.557 | -0.493 | -0.255 |
| A005164_01 | At3g44310 | nitrilase 1; protein id: At3g44310.1                       | -1.335 |    | -1.968 | -1.192 | -0.582 |
| A005167_01 | At3g54860 | vacuolar protein sorting protein 33a-like protein; pro     | 0.222  |    | 0.313  | -0.237 | 0.128  |
| A005171_01 | At1g67090 | ribulose-bisphosphate carboxylase small unit, putati       | 0.885  |    | -0.03  | 0.305  | 0.216  |
| A005173_01 | At5g26605 | putative protein; protein id: At5g26605.1                  | 0.133  |    | -0.327 | 0.154  | 0.057  |
| A005175_01 | At4g36990 | heat shock transcription factor HSF4; protein id: At4      | -0.849 |    | -0.752 | -0.362 | -0.557 |
| A005176_01 | At4g28520 | 12S cruciferin seed storage protein; protein id: At4g      | -3.868 |    | -3.921 | -2.611 | -4.434 |
| A005178_01 | At3g53750 | actin (ACT3); protein id: At3g53750.1                      | 0.906  |    | 0.635  | 0.45   | 0.824  |
| A005179_01 | At2g17480 | similar to Mlo proteins from H. vulgare; protein id: A     | 0.182  | NA |        | -0.196 | 0.415  |
| A005180_01 | At2g37620 | actin 3; protein id: At2g37620.1                           | 0.387  |    | 0.365  | 0.154  | 0.529  |
| A005182_01 | At2g28305 | expressed protein; protein id: At2g28305.1                 | -1.649 |    | -1.863 | -0.598 | -1.25  |
| A005187_01 | At2g40940 | ethylene response sensor (ERS); protein id: At2g40         | -0.245 |    | -0.257 | -0.479 | -0.122 |
| A005188_01 | At3g51820 | chlorophyll synthetase; protein id: At3g51820.1            | 0.287  |    | 0.469  | 0.293  | 0.853  |
| A005190_01 | At1g74310 | heat shock protein 101 (HSP101); protein id: At1g7         | 0.369  | NA |        | 0.899  | 1.295  |
| A005195_01 | At3g55440 | cytosolic triosephosphatisomerase; protein id: At3g        | 1.044  |    | 0.3    | 0.573  | 1.05   |
| A005196_01 | At1g66340 | ethylene-response protein, ETR1; protein id: At1g66        | -0.103 | NA | NA     | NA     | NA     |
| A005197_01 | At1g27350 | unknown protein; protein id: At1g27350.1                   | 0.433  |    | 0.676  | 0.572  | 0.553  |
| A005199_01 | At5g41360 | TFIIH basal transcription factor complex helicase XI       | -0.14  |    | -0.171 | NA     | 0.072  |
| A005203_01 | At5g49910 | heat shock protein 70 (gbjAAF27639.1); protein id: ,       | 0.36   |    | 0.367  | 0.363  | 1.018  |
| A005204_01 | At4g32210 | putative protein; protein id: At4g32210.1                  | 0.786  |    | 0.737  | 0.708  | 0.896  |
| A005208_01 | At1g60590 | polygalacturonase, putative; protein id: At1g60590.1       | 0.152  |    | 0.088  | 0.312  | 0.617  |
| A005209_01 | At1g70940 | PIN3; auxin transport protein REH1, putative; protei NA    |        | NA |        | 0.08   | 0.21   |
| A005211_01 | At4g10050 | lipase-like protein; protein id: At4g10050.1               | 0.076  |    | 0.154  | 0.466  | 1.143  |
| A005214_01 | At1g04310 | putative ethylene receptor (ERS2); protein id: At1g0       | 0.032  |    | -0.109 | NA     | 0.324  |
| A005220_01 | At3g20770 | ethylene-insensitive 3 (EIN3); protein id: At3g20770       | -1.118 |    | -0.887 | -0.665 | 0.26   |

|            |                |                                                           |           |           |           |        |
|------------|----------------|-----------------------------------------------------------|-----------|-----------|-----------|--------|
| A005223_01 | At5g26800      | putative protein; protein id: At5g26800.1                 | 1.313     | 1.25      | 1.043     | 1.237  |
| A005224_01 | xxxx           | b/t ferrochelatase-I; protein id: At5g26030.1 and put     | 0.043 NA  | NA        | NA        | 0.265  |
| A005227_01 | At5g25270      | putative protein; protein id: At5g25270.1                 | -0.738    | -0.233 NA | NA        | -1.238 |
| A005234_01 | xxxx           | b/t kinase like protein; protein id: At4g14780.1 and f    | -0.457 NA | NA        | NA        | 0.643  |
| A005236_01 | At1g65580      | unknown protein; protein id: At1g65580.1                  | -0.354    | -0.353    | -0.446    | -0.492 |
| A005239_01 | At5g20930      | protein kinase tousled; protein id: At5g20930.1           | 0.326 NA  | NA        | NA        | NA     |
| A005246_01 | At1g02660      | expressed protein; protein id: At1g02660.1                | -1.914    | -1.53     | -1.076    | -0.93  |
| A005247_01 | At2g21385      | expressed protein; protein id: At2g21385.1                | 0.606     | 0.365     | 0.144     | 0.247  |
| A005249_01 | At1g20880      | RRM-containing protein; protein id: At1g20880.1           | -1.392 NA | NA        | NA        | -0.84  |
| A005251_01 | xxxx           | b/t hypothetical protein; protein id: At4g02400.1 and     | 0.116 NA  | NA        | NA        | 0.051  |
| A005260_01 | At3g55460      | arginine/serine-rich protein SCL30; protein id: At3g5     | -0.177    | -0.261    | -0.003    | 0.03   |
| A005262_01 | At1g14830      | dynamain, putative; protein id: At1g14830.1               | 0.423 NA  | NA        | 0.159     | 0.99   |
| A005267_01 | At3g13870      | root hair defective 3 (RHD3); protein id: At3g13870.      | -0.015    | -0.438    | -1.035    | -0.527 |
| A005278_01 | At1g09010      | expressed protein; protein id: At1g09010.1                | -0.037    | -0.05     | -0.307    | -0.445 |
| A005279_01 | xxxx           | Identity not clear                                        | 0.654     | 0.833     | 0.581     | 0.617  |
| A005302_01 | At1g02270      | expressed protein; protein id: At1g02270.1                | -0.173 NA | NA        | -0.702    | -0.63  |
| A005305_01 | At5g20010      | RAN1 small Ras-like GTP-binding nuclear proteinR;         | -0.072    | -0.09     | -0.059    | 0.268  |
| A005310_01 | xxxx           | b/t unknown protein; protein id: At1g09430.1 and pu NA    | NA        | NA        | NA        | NA     |
| A005332_01 | At5g59710      | putative protein; protein id: At5g59710.1                 | -0.413    | -0.321    | -0.316    | 0.008  |
| A005335_01 | At1g32920      | expressed protein; protein id: At1g32920.1                | -0.629    | -0.511    | -0.317    | -0.951 |
| A005338_01 | At5g19530      | spermine synthase (ACL5); protein id: At5g19530.1         | 0.11      | 0.408     | 0.1       | 0.14   |
| A005346_01 | At1g10290      | putative phragmoplastin; protein id: At1g10290.1          | 0.294     | 0.402 NA  | NA        | 0.323  |
| A005354_01 | At3g41979      | 5SrRNA; protein id: At3g41979                             | NA        | 1.158     | 0.599     | 0.594  |
| A005356_01 | At4g16840      | expressed protein; protein id: At4g16840.1                | -1.079    | -0.658    | -0.972    | -0.977 |
| A005357_01 | At1g60490      | phosphatidylinositol 3-kinase, putative; protein id: A    | -0.365    | -0.838    | -0.622    | -0.518 |
| A005366_01 | At5g20250      | glycosyl hydrolase family 36; protein id: At5g20250.      | -2.234    | -2.313    | -1.516    | -2.771 |
| A005367_01 | At4g34265      | expressed protein; protein id: At4g34265.1                | 0.15      | 0.382     | 0.376     | -0.138 |
| A005368_01 | At5g26240      | CLC-d chloride channel protein; protein id: At5g262.      | -0.089    | -0.389    | -0.139    | 0.323  |
| A005371_01 | At3g15880      | putative WD-repeat protein; protein id: At3g15880.1       | -0.527    | -0.447    | 0.047     | 0.38   |
| A005376_01 | At1g51600      | flowering protein CONSTANS, putative; protein id: /       | 0.111     | 0.285 NA  | NA        | 0.745  |
| A005377_01 | At1g68945      | expressed protein; protein id: At1g68945.1                | -2.25     | -0.94     | -0.772    | -1.044 |
| A005384_01 | At4g08685      | expressed protein; protein id: At4g08685.1                | 1.276     | 1.552     | 1.211     | 1.314  |
| A005386_01 | At1g09795      | expressed protein; protein id: At1g09795.1                | 0.655     | 0.788     | 0.266     | 0.458  |
| A005389_01 | At5g27450      | mevalonate kinase; protein id: At5g27450.1                | 0.791     | 0.899     | 0.484     | 0.839  |
| A005390_01 | At5g37020      | auxin response transcription factor (ARF8); protein i     | 0.836     | 0.65      | 1.023     | 1.888  |
| A005391_01 | xxxx           | b/t small nuclear ribonucleoprotein, putative; protein    | 0.438     | 0.533     | 0.723     | 0.521  |
| A005394_01 | At5g62700      | tubulin beta-2/beta-3 chain (sp)P29512); protein id:      | 0.757     | 0.581     | 0.661     | 1.034  |
| A005395_01 | At3g55000      | expressed protein; protein id: At3g55000.1                | 0.441     | 0.35      | 0.452     | 0.289  |
| A005401_01 | At5g20020      | GTP-binding nuclear protein (RAN-2), putative; prot       | 0.498     | 0.451     | 0.363     | 0.145  |
| A005403_01 | At5g20830      | sucrose-UDP glucosyltransferase                           | -0.329    | -0.368    | -0.153    | 0.103  |
| A005407_01 | At1g02475      | unknown protein; protein id: At1g02475.1                  | -0.625    | -1.276    | -0.27     | -1.07  |
| A005410_01 | At5g26696      | nectarin - like protein; protein id: At5g26696.1          | -0.735    | -0.492    | -0.792    | -1.634 |
| A005411_01 | At1g11480      | expressed protein; protein id: At1g11480.1                | -0.719    | -0.393    | -0.513 NA | NA     |
| A005413_01 | At1g60560      | hypothetical protein; protein id: At1g60560.1             | -0.193    | -0.057    | -0.321    | 0.226  |
| A005414_01 | At1g60670      | expressed protein; protein id: At1g60670.1                | -0.262    | -0.426    | -0.137    | 0.147  |
| A005416_01 | At5g27030      | putative protein; protein id: At5g27030.1                 | 0.015     | -0.148    | 0.173     | 0.288  |
| A005417_01 | not annotated  | Chr1 C/20403687-20403756                                  | -1.055    | -0.928    | -0.547    | -0.721 |
| A005426_01 | At5g38980      | putative protein; protein id: At5g38980.1                 | -1.296    | -1.398    | -0.302    | -0.512 |
| A005431_01 | At2g14835      | expressed protein; protein id: At2g14835.1                | 0.482     | 0.244     | 0.299     | 0.411  |
| A005434_01 | At5g18670      | glycosyl hydrolase family 14 (beta-amylase); proteir      | -0.669    | -0.903    | -0.025    | 0.366  |
| A005439_01 | At3g51870      | putative carrier protein; protein id: At3g51870.1         | -0.44     | -0.578    | -0.387    | -0.432 |
| A005477_01 | xxxx           | b/t hypothetical protein; protein id: At1g03100.1 and NA  | NA        | NA        | -1.124    | -1.435 |
| A005500_01 | At1g43190      | heterogeneous nuclear ribonucleoprotein (hnRNP),          | 0.372     | 0.248     | 0.17      | 0.383  |
| A005506_01 | At5g20920      | translation initiation factor eIF-2 beta chain - like prc | 0.179     | 0.119     | 0.274     | 0.54   |
| A005518_01 | At1g22860      | unknown protein; protein id: At1g22860.1                  | -0.235 NA | NA        | NA        | NA     |
| A005521_01 | At1g02150      | hypothetical protein; protein id: At1g02150.1             | 0.481     | 0.421     | -0.035    | 0.058  |
| A005522_01 | At2g20950      | unknown protein; protein id: At2g20950.1                  | -0.043    | 0.357     | -0.021    | 0.101  |
| A005526_01 | At1g02090      | COP9 complex subunit, FUS5; protein id: At1g0209          | 0.44      | 0.514 NA  | NA        | 0.368  |
| A005532_01 | At4g00335      | expressed protein; protein id: At4g00335.1                | -0.493    | -0.483    | 0.099     | 0.283  |
| A005542_01 | At1g08120      | unknown protein; protein id: At1g08120.1                  | 0.089     | 0.136     | 0.453     | 0.637  |
| A005552_01 | At3g53830      | putative protein; protein id: At3g53830.1                 | -0.608 NA | NA        | 0.774     | 1.413  |
| A005553_01 | At1g55670      | photosystem I subunit V precursor, putative; protein      | 0.029     | 0.036     | -0.019    | -0.492 |
| A005557_01 | At3g51890      | putative protein; protein id: At3g51890.1                 | -1.586    | -1.792 NA | NA        | -1.764 |
| A005558_01 | not annotatetd | Chr4 C/7951826-7951895                                    | 0.535     | 0.686     | 0.309     | 0.252  |
| A005562_01 | At1g23870      | trehalose 6-phosphate synthase, putative; protein ic      | -1.564    | -1.538    | -1.199    | -1.775 |
| A005564_01 | At1g02080      | unknown protein; protein id: At1g02080.1                  | -0.344    | -0.562    | -0.105    | -0.152 |
| A005571_01 | At1g75690      | unknown protein; protein id: At1g75690.1                  | 0.639     | 0.591     | 0.123     | -0.362 |
| A005576_01 | At1g75710      | unknown protein; protein id: At1g75710.1                  | 1.473     | 1.278     | 1.242     | 1.549  |

|            |               |                                                        |           |           |           |        |
|------------|---------------|--------------------------------------------------------|-----------|-----------|-----------|--------|
| A005577_01 | At4g38240     | glycosyltransferase like protein; protein id: At4g382. | -0.609    | -0.205    | -0.353    | -0.003 |
| A005583_01 | At1g65820     | microsomal glutathione s-transferase, putative; prot   | -0.494    | -0.705    | -0.185    | -0.382 |
| A005588_01 | At5g26300     | putative protein; protein id: At5g26300.1              | -0.82     | -0.489 NA |           | 0.146  |
| A005589_01 | At5g09670     | putative protein; protein id: At5g09670.1              | -0.651    | -0.665    | -0.222    | 0.234  |
| A005590_01 | At4g16155     | expressed protein; protein id: At4g16155.1             | 1.031     | 1.153     | 0.616     | 1.412  |
| A005591_01 | At1g08380     | expressed protein; protein id: At1g08380.1             | -0.134    | -0.214    | -0.08     | -0.598 |
| A005592_01 | At5g25610     | dehydration-induced protein RD22; protein id: At5g2    | -1.28     | -1.152    | -0.095    | -0.098 |
| A005594_01 | At1g54490     | exonuclease, putative; protein id: At1g54490.1         | -0.198    | -0.19     | 0.001     | 0.318  |
| A005600_01 | At4g23270     | serine/threonine kinase; protein id: At4g23270.1       | -0.672    | -0.397 NA |           | 0.176  |
| A005601_01 | At3g54100     | putative protein; protein id: At3g54100.1              | -0.631    | -0.413 NA |           | 0.268  |
| A005609_01 | At1g80030     | DnaJ protein, putative; protein id: At1g80030.1        | 0.435     | 0.729     | -0.112    | -0.103 |
| A005613_01 | At1g22850     | expressed protein; protein id: At1g22850.1             | -0.195    | -0.123    | -0.24     | -0.61  |
| A005615_01 | At1g32540     | zinc-finger protein, putative; protein id: At1g32540.1 | 0.603     | 0.817     | 0.446     | 0.632  |
| A005616_01 | At5g61060     | histone deacetylase - like; protein id: At5g61060.1    | -0.312    | -0.186    | -0.192    | 0.357  |
| A005620_01 | At5g28020     | cysteine synthase; protein id: At5g28020.1             | -1.309    | -1.683    | -1.029    | -1.349 |
| A005629_01 | At5g21170     | AKIN beta1; protein id: At5g21170.1                    | -1.134    | -1.037    | -0.612    | -1.151 |
| A005636_01 | At5g24165     | expressed protein; protein id: At5g24165.1             | -0.648    | -0.341    | -0.329    | -0.408 |
| A005646_01 | At1g35516     | myb family transcription factor; protein id: At1g3551  | -0.393    | -0.38     | 0.019     | 0.152  |
| A005648_01 | At2g04160     | subtilisin-like serine protease AIR3; protein id: At2g | -2.164    | -2.116    | -1.753    | -1.622 |
| A005655_01 | At2g42780     | expressed protein; protein id: At2g42780.1             | -0.367    | -0.751    | -0.699    | -0.759 |
| A005659_01 | At1g02260     | hypothetical protein; protein id: At1g02260.1          | -0.141 NA | NA        |           | -0.026 |
| A005661_01 | At1g24020     | Bet v I allergen family; protein id: At1g24020.1       | 1.526     | 1.333     | 1.118     | 1.785  |
| A005677_01 | At3g41768     | 18SrRNA                                                | -0.208    | -0.065    | -0.005    | 0.348  |
| A005680_01 | At1g20430     | expressed protein; protein id: At1g20430.1             | 1.161     | 1.077     | 0.975     | 1.05   |
| A005687_01 | At5g58570     | expressed protein; protein id: At5g58570.1             | -2.445    | -2.207    | -1.849 NA |        |
| A005688_01 | At1g17580     | myosin, putative; protein id: At1g17580.1              | -0.576    | -0.411    | -0.235    | 0.272  |
| A005690_01 | At5g21040     | F-box protein family; protein id: At5g21040.1          | -0.352    | 0.061 NA  |           | -0.169 |
| A005692_01 | At5g48655     | expressed protein; protein id: At5g48655.2             | NA        | NA        | NA        | -0.572 |
| A005695_01 | At1g65800     | receptor kinase, putative; protein id: At1g65800.1     | -2.44 NA  | NA        | NA        | NA     |
| A005699_01 | At5g19220     | Glucose-1-phosphate adenyllyltransferase (ApL1/ad      | 0.48      | 0.333     | -0.187    | 0.116  |
| A005701_01 | At3g51880     | high mobility group protein 2-like; protein id: At3g51 | -0.133    | -0.332    | -0.388    | -0.432 |
| A005702_01 | At3g10690     | putative DNA gyrase subunit A; protein id: At3g1069    | 0.646     | 0.699     | 0.595     | 1.012  |
| A005703_01 | At5g26880     | putative protein; protein id: At5g26880.1              | 0.148     | 0.326     | 0.013     | -0.194 |
| A005706_01 | At3g51850     | calcium-dependent protein kinase; protein id: At3g5    | 0.05      | -0.172    | -0.337    | -0.045 |
| A005707_01 | not annotated | EST glutathione transferase (X68304 by NCBI blast      | 0.083     | 0.128     | -0.211    | 0.478  |
| A005708_01 | At5g20500     | glutaredoxin; protein id: At5g20500.1                  | 0.264     | 0.147     | 0.082     | 0.35   |
| A005709_01 | At4g17500     | ethylene responsive element binding factor 1 (frame    | 0.174     | 0.043     | -0.064    | 0.28   |
| A005710_01 | At5g20730     | auxin response transcription factor (ARF7); protein i  | -0.25     | 0.075     | 0.221     | 0.61   |
| A005712_01 | At4g38620     | putative transcription factor (MYB4); protein id: At4g | -0.124    | -0.342    | 0.248     | 0.465  |
| A005713_01 | At5g19520     | putative protein; protein id: At5g19520.1              | 0.552     | 0.548     | 0.549     | 0.741  |
| A005714_01 | At5g25460     | unknown protein                                        | 1.277     | 0.872     | 0.987     | 1.648  |
| A005715_01 | At1g27435     | expressed protein; protein id: At1g27435.1             | 0.868     | 1.198     | 0.59      | 0.791  |
| A005718_01 | not annotated | Chr1 W/2854968-2855025                                 | -0.214    | -0.288    | -0.69     | -0.321 |
| A005719_01 | At5g62470     | MYB96 transcription factor-like protein; protein id: A | -0.063    | -0.004    | -0.065    | 0.527  |
| A005720_01 | At2g44160     | putative methylenetetrahydrofolate reductase; prote    | -0.095    | -0.188    | 0.077     | 0.708  |
| A005721_01 | At1g60790     | hypothetical protein; protein id: At1g60790.1          | 0.429     | 0.354     | 0.22      | 0.759  |
| A005722_01 | At1g60770     | hypothetical protein; protein id: At1g60770.1          | 0.929     | 0.909     | 0.733     | 1.111  |
| A005723_01 | At1g60660     | cytochrome b5, putative; protein id: At1g60660.1       | 0.832     | 1.01      | 1.089     | 1.34   |
| A005725_01 | At1g05180     | RUB-activating enzyme AXR1; protein id: At1g0518       | 0.329     | 0.21      | 0.101     | 0.533  |
| A005726_01 | At3g62030     | peptidylprolyl isomerase ROC4; protein id: At3g620     | 1.233     | 0.858     | 0.622     | 1.198  |
| A005727_01 | At3g47340     | glutamine-dependent asparagine synthetase; protei      | -2.236    | -2.155    | -1.413    | -1.133 |
| A005729_01 | At2g25625     | auxin-regulated protein; protein id: At2g25625.1       | -4.511    | -4.651    | -2.084    | -2.409 |
| A005730_01 | At2g22670     | auxin-regulated protein (IAA8); protein id: At2g2267   | 1.043     | 0.708     | 0.76      | 1.647  |
| A005731_01 | At1g28610     | lipase, putative; protein id: At1g28610.1              | -0.042    | -0.111    | -0.024    | 0.564  |
| A005732_01 | At1g72740     | putative DNA-binding protein; protein id: At1g72740    | -0.135    | 0.07      | -0.163    | 0.431  |
| A005733_01 | At2g46830     | myb-related transcription factor (CCA1); protein id: , | -1.868    | -2.321    | -1.018    | -1.436 |
| A005736_01 | At1g11910     | putative aspartic proteinase; protein id: At1g11910.   | -0.542    | -1.163    | -0.522    | -0.204 |
| A005739_01 | At5g43700     | auxin-induced protein AUX2-11 (sp P33077); protei      | -0.168    | -0.36     | -0.237    | -0.151 |
| A005740_01 | At1g12730     | expressed protein; protein id: At1g12730.1             | -1.565    | -0.955 NA |           | -0.91  |
| A005741_01 | At2g34420     | photosystem II type I chlorophyll a /b binding proteir | -0.694    | -0.544    | -0.696    | -0.465 |
| A005742_01 | At3g08580     | adenylate translocator; protein id: At3g08580.2        | 0.623     | 0.679     | 0.303     | 1.006  |
| A005743_01 | At1g05010     | 1-aminocyclopropane-1-carboxylate oxidase; proteir     | -1.178    | -0.975    | -0.399    | -0.439 |
| A005744_01 | At2g22430     | homeodomain transcription factor (ATHB-6); proteir     | -0.464    | -0.706    | -0.294    | -0.418 |
| A005745_01 | At2g35605     | expressed protein; protein id: At2g35605.1             | 0.535     | 0.547     | 0.562     | 0.874  |
| A005746_01 | At3g49010     | 60S ribosomal protein L13, BBC1 protein; protein id    | 0.866     | 0.839     | 0.874     | 1.412  |
| A005749_01 | At2g47730     | glutathione transferase, putative (GST6); protein id:  | -0.795    | -0.557    | -0.016    | -0.288 |
| A005750_01 | At4g29660     | putative protein; protein id: At4g29660.1              | -0.399    | -0.205 NA | NA        |        |
| A005751_01 | At4g37520     | peroxidase, putative; protein id: At4g37520.1          | -3.698    | -3.715    | -2.611    | -3.634 |



|            |               |                                                                                   |        |        |        |        |
|------------|---------------|-----------------------------------------------------------------------------------|--------|--------|--------|--------|
| A005754_01 | At4g11290     | peroxidase, putative; protein id: At4g11290.1                                     | 0.934  | 0.708  | 0.644  | 1.086  |
| A005755_01 | xxxx          | No hits found                                                                     | -0.065 | -0.159 | -0.262 | 0.297  |
| A005763_01 | At3g55600     | putative protein; protein id: At3g55600.1                                         | NA     | NA     | NA     | NA     |
| A005766_01 | At1g48520     | expressed protein; protein id: At1g48520.1                                        | 0.87   | 0.83   | 0.024  | 0.718  |
| A005771_01 | At5g27850     | putative 60S ribosomal protein                                                    | 1.177  | 0.888  | 0.829  | 1.287  |
| A005782_01 | At4g00755     | F-box protein family; protein id: At4g00755.1                                     | -0.1   | 0.127  | NA     | 0.492  |
| A005783_01 | At1g02280     | putative GTP-binding protein; protein id: At1g02280                               | 0.085  | 0.322  | NA     | 0.283  |
| A005784_01 | At1g02170     | hypothetical protein common family; protein id: At1g02170                         | -0.261 | NA     | NA     | -1.046 |
| A005787_01 | At5g25900     | cytochrome P450 GA3; protein id: At5g25900.1                                      | -0.82  | -0.643 | -0.336 | -0.567 |
| A005792_01 | xxxx          | b/t ferrochelatase-I; protein id: At5g26030.1 and putative                        | -0.454 | -0.266 | NA     | -0.75  |
| A005827_01 | At4g21105     | expressed protein; protein id: At4g21105.1                                        | -0.394 | -0.029 | 0.127  | 0.23   |
| A005834_01 | At5g19860     | unknown protein; protein id: At5g19860.1                                          | -0.975 | -0.52  | -0.728 | -0.652 |
| A005835_01 | At1g75730     | hypothetical protein; protein id: At1g75730.1                                     | -0.72  | -0.941 | -0.584 | -0.434 |
| A005839_01 | At5g27150     | NHE1 Na <sup>+</sup> /H <sup>+</sup> exchanger; protein id: At5g27150.1           | -1.488 | -0.917 | NA     | -0.606 |
| A005845_01 | xxxx          | b/t At1g65840 and At1g65850 Chr1 C/24093474-24                                    | -1.721 | NA     | 0.029  | NA     |
| A005846_01 | At1g23950     | auxin-regulated protein; protein id: At1g23950.1                                  | -0.428 | -0.278 | -0.272 | 0.031  |
| A005856_01 | At5g59613     | expressed protein; protein id: At5g59613.1                                        | 0.302  | 0.412  | 0.399  | 0.235  |
| A005864_01 | At1g75500     | nodulin-like protein; protein id: At1g75500.1                                     | 0.539  | 0.68   | 0.728  | 0.922  |
| A005869_01 | At3g44340     | putative protein; protein id: At3g44340.1                                         | 0.223  | 0.37   | NA     | 0.272  |
| A005870_01 | At5g64050     | glutamate-tRNA ligase; protein id: At5g64050.1                                    | -0.047 | 0.496  | -0.078 | 0.389  |
| A005879_01 | At1g23860     | splicing factor SRZ_21; protein id: At1g23860.1                                   | 0.018  | NA     | 0.194  | -0.162 |
| A005885_01 | At1g49590     | unknown protein; protein id: At1g49590.1                                          | -0.151 | -0.102 | 0.124  | 0.27   |
| A005906_01 | At5g20150     | ids4-like protein; protein id: At5g20150                                          | -0.145 | 0.092  | 0.916  | 1.792  |
| A005910_01 | At1g58520     | expressed protein; protein id: At1g58520.1                                        | -1.47  | -1.18  | -1.204 | -0.45  |
| A005911_01 | At4g18140     | putative protein; protein id: At4g18140.1                                         | NA     | NA     | NA     | -0.357 |
| A005914_01 | At5g17020     | putative exportin1 protein XPO1                                                   | -0.1   | 0.012  | 0.091  | 0.378  |
| A005915_01 | At1g80410     | putative N-terminal acetyltransferase; protein id: At1g80410                      | 0.654  | 0.563  | 0.024  | -0.117 |
| A005916_01 | xxxx          | b/t putative protein; protein id: At4g13490.1 and putative                        | -0.103 | -0.141 | 0.491  | 1.045  |
| A005926_01 | At5g26990     | drought-induced protein - like; protein id: At5g26990                             | -0.289 | -0.322 | -0.125 | 0.001  |
| A005928_01 | At1g75630     | vacuolar ATP synthase, putative; protein id: At1g75630                            | -0.457 | NA     | 0.068  | -0.102 |
| A005930_01 | At1g60620     | RNA polymerase subunit; protein id: At1g60620.1                                   | -0.026 | 0.215  | -0.03  | 0.148  |
| A005933_01 | At1g50640     | ethylene responsive element binding factor 3 (AtERF3); protein id: At1g50640      | -1.157 | -0.888 | -0.557 | -0.674 |
| A005935_01 | At3g15210     | ethylene responsive element binding factor 4 (AtERF4); protein id: At3g15210      | 0.065  | 0.36   | -0.068 | -0.213 |
| A005936_01 | At5g26760     | putative protein; protein id: At5g26760.1                                         | -0.008 | -0.212 | NA     | -0.051 |
| A005938_01 | At1g27510     | unknown protein; protein id: At1g27510.1                                          | -0.293 | NA     | -0.53  | -0.794 |
| A005939_01 | At4g11600     | glutathione peroxidase, putative; protein id: At4g11600                           | -0.591 | -0.636 | -0.4   | -0.314 |
| A005946_01 | At1g76090     | S-adenosyl-methionine-sterol-C-methyltransferase, putative; protein id: At1g76090 | 0.472  | 0.452  | 0.168  | 0.163  |
| A005948_01 | At1g23960     | unknown protein; protein id: At1g23960.1                                          | -0.36  | -0.508 | -0.355 | 0.004  |
| A005949_01 | At1g60800     | receptor-like kinase, putative; protein id: At1g60800                             | 0.226  | 0.184  | NA     | 0.471  |
| A005954_01 | At5g27380     | glutathione synthetase (GSH2); protein id: At5g27380                              | 0.291  | -0.036 | -0.296 | -0.198 |
| A005955_01 | At3g16190     | putative hydrolase; protein id: At3g16190.1                                       | -0.675 | -0.468 | -0.387 | -0.873 |
| A005958_01 | At4g26940     | Avr9 elicitor response like protein; protein id: At4g26940                        | 0.752  | 0.468  | -0.003 | 0.327  |
| A005959_01 | At5g03240     | polyubiquitin (UBQ3); protein id: At5g03240.1                                     | -1.548 | -1.397 | -0.864 | -0.805 |
| A005962_01 | At5g51105     | unknown protein; protein id: At5g51105.1                                          | 0.014  | 0.281  | NA     | -0.223 |
| A005963_01 | At1g60550     | hypothetical protein; protein id: At1g60550.1                                     | -0.362 | 0.481  | -0.311 | -0.581 |
| A005965_01 | At3g02310     | floral homeotic protein AGL4; protein id: At3g02310                               | -0.85  | -0.805 | -0.01  | 0.552  |
| A005969_01 | At1g61520     | light-harvesting chlorophyll a/b binding protein; protein id: At1g61520           | -1.24  | -0.982 | -1.023 | -1.086 |
| A005972_01 | At5g37710     | calmodulin-binding heat-shock protein; protein id: At5g37710                      | -0.084 | 0.179  | -0.204 | -0.059 |
| A005981_01 | At1g20620     | catalase 3; protein id: At1g20620.1                                               | -1.626 | -2.201 | -1.014 | -1.562 |
| A005984_01 | At1g75680     | glycosyl hydrolase family 9; protein id: At1g75680.1                              | 1.008  | 0.876  | 0.604  | 1.275  |
| A005989_01 | At1g29930     | light-harvesting chlorophyll a/b binding protein; protein id: At1g29930           | 0.644  | 0.016  | 0.052  | -0.077 |
| A005991_01 | At5g44120     | legumin-like protein; protein id: At5g44120.1                                     | -3.651 | -3.664 | -2.73  | -4.121 |
| A005992_01 | At5g18390     | putative protein; protein id: At5g18390.1                                         | -0.275 | -0.078 | -0.038 | 0.434  |
| A005999_01 | not annotated | Chr3 W/5862323-5862392                                                            | 0.128  | 0.715  | 0.156  | 0.178  |
| A006003_01 | xxxx          | b/t putative protein; protein id: At5g08440.1 and putative                        | -0.271 | -0.143 | NA     | -0.229 |
| A006014_01 | At1g33055     | expressed protein; protein id: At1g33055.1                                        | NA     | NA     | NA     | NA     |
| A006015_01 | xxxx          | b/t RING finger - like protein; protein id: At3g54360                             | -0.543 | -0.582 | -0.477 | -1.205 |
| A006017_01 | At1g24050     | unknown protein; protein id: At1g24050.1                                          | 0.161  | -0.027 | 0.069  | 0.129  |
| A006021_01 | not annotated | EST ethylene-responsive element binding protein. (AtERF1); protein id: At1g24050  | -2.477 | -2.343 | -0.999 | -1.842 |
| A006022_01 | At4g20260     | endomembrane-associated protein; protein id: At4g20260                            | -3.057 | NA     | -1.923 | -1.721 |
| A006027_01 | At5g53300     | ubiquitin-conjugating enzyme; protein id: At5g53300                               | -0.717 | -0.798 | -0.189 | 0.154  |
| A006030_01 | At2g40880     | putative cysteine proteinase inhibitor B (cystatin B); protein id: At2g40880      | -2.33  | -2.324 | -1.863 | -2.428 |
| A006032_01 | At2g46500     | expressed protein; protein id: At2g46500.1                                        | -0.345 | -0.71  | -0.427 | -0.348 |
| A006033_01 | At2g36060     | E2, ubiquitin-conjugating enzyme, putative; protein id: At2g36060                 | -0.327 | -0.092 | -0.097 | -0.083 |
| A006034_01 | At2g43560     | FKBP-type peptidyl-prolyl cis-trans isomerase; protein id: At2g43560              | 0.29   | 0.147  | -0.164 | -0.336 |
| A006035_01 | At2g22125     | unknown protein; protein id: At2g22125.1                                          | 0.193  | 0.061  | -0.005 | -0.163 |
| A006036_01 | At2g28370     | expressed protein; protein id: At2g28370.1                                        | -0.251 | NA     | NA     | -0.288 |
| A006039_01 | At2g03710     | MADS-box protein (AGL3); protein id: At2g03710.1                                  | -0.888 | -1.042 | NA     | NA     |

|            |           |                                                               |           |           |        |        |
|------------|-----------|---------------------------------------------------------------|-----------|-----------|--------|--------|
| A006040_01 | At2g47650 | putative dTDP-glucose 4-6-dehydratase; protein id:            | 0.844     | 0.492     | 0.552  | 0.556  |
| A006041_01 | At2g43360 | biotin synthase (Bio B); protein id: At2g43360.1              | 1.189     | 1.055     | 1.049  | 1.647  |
| A006042_01 | At2g29590 | expressed protein; protein id: At2g29590.1                    | -0.325    | -0.337    | 0.056  | -0.501 |
| A006043_01 | At2g31570 | glutathione peroxidase, putative; protein id: At2g31570.1     | -0.986    | -0.96     | -0.372 | -0.489 |
| A006045_01 | At2g18710 | putative preprotein translocase SECY protein; prote           | -0.111    | -0.022    | 0.012  | 0.417  |
| A006046_01 | At2g43510 | putative trypsin inhibitor; protein id: At2g43510.1           | -2.741    | -2.434    | -1.984 | -2.337 |
| A006048_01 | At2g28800 | chloroplast membrane protein (ALBINO3)(ALB3)(O)               | -0.576    | -0.855    | -1.049 | -1.011 |
| A006049_01 | At2g10940 | expressed protein; protein id: At2g10940.1                    | 1.203     | 0.977     | 0.73   | 0.841  |
| A006050_01 | At2g39000 | unknown protein; protein id: At2g39000.1                      | -1.016    | -1.229    | -1.002 | -1.522 |
| A006051_01 | At2g18020 | 60S ribosomal protein L2; protein id: At2g18020.1             | 0.197     | 0.449     | 0.559  | 0.647  |
| A006052_01 | At2g47160 | putative anion exchange protein; protein id: At2g47160.1      | 0.53      | 0.463     | 0.488  | 1.348  |
| A006055_01 | At2g17390 | putative glucanase; protein id: At2g17390.1                   | 0.114     | -0.046    | 0.219  | 0.6    |
| A006056_01 | At2g37970 | expressed protein; protein id: At2g37970.1                    | -1.917    | -1.845    | -0.59  | -1.338 |
| A006058_01 | At2g24150 | expressed protein; protein id: At2g24150.1                    | 0.33      | 0.17      | 0.241  | 0.424  |
| A006059_01 | At2g19790 | putative clathrin assembly protein; protein id: At2g19790.1   | 0.09      | 0.29      | 0.13   | -0.119 |
| A006060_01 | At2g33700 | protein phosphatase 2C (PP2C); protein id: At2g33700.1        | -0.495    | -0.569    | -0.367 | -0.463 |
| A006063_01 | At2g38530 | putative nonspecific lipid-transfer protein; protein id:      | 0.485     | 0.61      | 0.61   | 0.243  |
| A006066_01 | At2g24220 | hypothetical protein; protein id: At2g24220.1                 | 0.029     | 0.312 NA  |        | 0.512  |
| A006068_01 | At2g33310 | auxin regulated protein (IAA13); protein id: At2g33310.1      | -0.235    | -0.283    | 0.131  | 0.281  |
| A006070_01 | At2g26330 | putative receptor-like protein kinase, ERECTA; prot           | 1.237     | 1.167     | 1.029  | 1.587  |
| A006073_01 | At2g28870 | expressed protein; protein id: At2g28870.1                    | -0.043    | -0.097 NA |        | NA     |
| A006077_01 | At2g17790 | putative vacuolar sorting protein 35; protein id: At2g17790.1 | 0.375 NA  |           | NA     | 0.233  |
| A006078_01 | At2g29560 | putative enolase (2-phospho-D-glycerate hydroxylase)          | 0.846     | 0.757     | 0.544  | 0.756  |
| A006079_01 | At2g05830 | putative translation initiation factor eIF-2B alpha sub       | 0.597     | 0.528     | 0.479  | 0.954  |
| A006082_01 | At2g33430 | plastid protein; protein id: At2g33430.1                      | 0.523     | 0.501     | 0.218  | 0.427  |
| A006085_01 | At2g24280 | putative prolylcarboxypeptidase; protein id: At2g24280.1      | -0.764    | -0.877    | -0.463 | -0.111 |
| A006087_01 | At2g20670 | expressed protein; protein id: At2g20670.1                    | -3.093 NA |           | -1.392 | -1.894 |
| A006089_01 | At2g20920 | unknown protein; protein id: At2g20920.1                      | -1.768    | -1.299    | -1.123 | -1.869 |
| A006090_01 | At2g02850 | putative basic blue protein (plantacyanin); protein id        | 1.761     | 1.621     | 1.829  | 2.389  |
| A006092_01 | At2g40280 | expressed protein; protein id: At2g40280.1                    | 0.492 NA  |           | NA     | 0.344  |
| A006095_01 | At2g35040 | putative phosphoribosylaminoimidazolecarboxamide              | 0.578     | 0.675     | 0.289  | 0.771  |
| A006096_01 | At2g41420 | unknown protein; protein id: At2g41420.1                      | -0.181    | -0.087    | 0.225  | -0.147 |
| A006099_01 | At2g35680 | expressed protein; protein id: At2g35680.1                    | -1.465    | -1.647    | -0.688 | -0.697 |
| A006100_01 | At2g33370 | 60S ribosomal protein L23; protein id: At2g33370.1            | 1.1       | 0.902     | 0.804  | 1.278  |
| A006101_01 | At2g16710 | putative HesB-like protein; protein id: At2g16710.1           | -0.57     | -0.498    | -0.746 | -0.516 |
| A006102_01 | At2g46450 | cyclic nucleotide-regulated ion channel, putative; pr         | -0.926 NA |           | NA     | -0.517 |
| A006104_01 | At2g05520 | putative glycine-rich protein; protein id: At2g05520.1        | -1.681 NA |           | -1.233 | -2.678 |
| A006105_01 | At2g03340 | WRKY family transcription factor; protein id: At2g03340.1     | -0.703 NA |           | NA     | -1.529 |
| A006110_01 | At2g26340 | expressed protein; protein id: At2g26340.1                    | -0.401    | -0.19     | -0.178 | -0.197 |
| A006118_01 | At2g25610 | putative vacuolar ATP synthase proteolipid subunit;           | -0.212    | -0.234    | -0.022 | -0.656 |
| A006119_01 | At2g25740 | hypothetical protein; protein id: At2g25740.1                 | -0.085    | -0.161    | -0.225 | 0.089  |
| A006123_01 | At2g17410 | unknown protein; protein id: At2g17410.1                      | 0.141     | -0.123    | -0.175 | -0.547 |
| A006124_01 | At2g05620 | expressed protein; protein id: At2g05620.1                    | -1.025    | -0.802    | -0.703 | -1.148 |
| A006125_01 | At2g27730 | expressed protein; protein id: At2g27730.1                    | 0.796     | 0.378     | 0.264  | -0.001 |
| A006126_01 | At2g46225 | TITL expressed protein; protein id: At2g46225.1               | 0.565     | 0.413     | 0.717  | 1.356  |
| A006132_01 | At2g25720 | expressed protein; protein id: At2g25720.1                    | -0.285    | -0.017    | 0.377  | -0.534 |
| A006136_01 | At2g41760 | expressed protein; protein id: At2g41760.1                    | 0.567     | 0.618     | 0.562  | 0.749  |
| A006138_01 | At2g17265 | 3-hydroxy-3-methylglutaryl-coenzyme A reductase 2             | -0.221    | -0.011    | 0.238  | 0.218  |
| A006143_01 | At2g20580 | 26S proteasome regulatory subunit S2 (RPN1); prot             | 0.126     | 0.11      | 0.182  | 0.258  |
| A006146_01 | At2g38040 | putative alpha-carboxyltransferase; protein id: At2g38040.1   | 0.398     | -0.002    | -0.34  | -0.38  |
| A006152_01 | At2g45670 | unknown protein; protein id: At2g45670.1                      | -0.469    | -0.419    | -0.355 | -0.672 |
| A006159_01 | At2g24940 | putative steroid binding protein; protein id: At2g24940.1     | -0.256    | 0.003     | -0.201 | -0.727 |
| A006163_01 | At2g27020 | 20S proteasome alpha subunit G (PAG1); protein id             | 0.529     | 0.34      | 0.383  | 0.698  |
| A006164_01 | At2g01140 | putative aldolase; protein id: At2g01140.1                    | 0.571     | 0.611     | 0.446  | 0.234  |
| A006168_01 | At2g40060 | expressed protein; protein id: At2g40060.1                    | 0.221     | -0.267    | 0.146  | 0.022  |
| A006169_01 | At2g24270 | putative NADP-dependent glyceraldehyde-3-phosph               | -0.352    | 0.062     | -0.015 | 0.218  |
| A006172_01 | At2g27110 | mutator-like transposase; protein id: At2g27110.1             | 0.082 NA  |           | NA     | NA     |
| A006173_01 | At2g28070 | ABC transporter family protein; protein id: At2g28070.1       | 0.013 NA  |           | NA     | 0.204  |
| A006175_01 | At2g35690 | putative acyl-CoA oxidase; protein id: At2g35690.1            | -0.864    | -0.798    | -0.619 | -0.744 |
| A006177_01 | At2g43790 | MAP kinase (ATMPK6); protein id: At2g43790.1                  | -0.571 NA |           | NA     | -0.797 |
| A006178_01 | At2g04880 | WRKY family transcription factor (ZAP1); protein id:          | -0.301    | -0.466    | -0.197 | -0.136 |
| A006181_01 | At2g14900 | similar to gibberellin-regulated proteins; protein id: A      | 0.421     | 0.318     | 0.375  | 0.565  |
| A006182_01 | At2g06520 | expressed protein; protein id: At2g06520.1                    | -0.572    | -0.428    | -0.355 | -1.102 |
| A006185_01 | At2g20040 | putative cAMP-dependent protein kinase; protein id:           | -0.777    | -0.662    | -0.564 | -0.345 |
| A006189_01 | At2g14260 | proline iminopeptidase; protein id: At2g14260.1               | 0.245     | 0.131     | 0.332  | 0.253  |
| A006191_01 | xxxx      | b/t hypothetical protein; protein id: At2g14110.1 and         | 0.207     | -0.099    | -0.058 | 0.212  |
| A006193_01 | At2g01600 | expressed protein; protein id: At2g01600.1                    | -0.539    | -0.556 NA |        | -0.688 |
| A006195_01 | At2g43520 | putative trypsin inhibitor; protein id: At2g43520.1           | 0.026     | 0.494     | -0.494 | -0.646 |

|            |           |                                                         |           |           |           |        |
|------------|-----------|---------------------------------------------------------|-----------|-----------|-----------|--------|
| A006197_01 | At2g01610 | unknown protein; protein id: At2g01610.1                | 0.324     | 0.264     | 0.36      | 0.126  |
| A006199_01 | At2g42590 | 14-3-3 protein GF14 mu (grf9); protein id: At2g4259     | -0.77     | -0.561    | -0.528    | -0.418 |
| A006202_01 | At2g28080 | putative glucosyltransferase; protein id: At2g28080.    | 1.15      | 1.095     | 0.749     | 0.75   |
| A006203_01 | At2g36290 | expressed protein; protein id: At2g36290.1              | -0.159    | 0.146 NA  |           | 0.347  |
| A006211_01 | At2g46370 | putative auxin-responsive protein; protein id: At2g46   | -0.799    | -0.698    | -0.61     | -0.203 |
| A006212_01 | At2g22660 | unknown protein; protein id: At2g22660.1                | -0.519    | -0.528    | 0.17      | 0.651  |
| A006214_01 | At2g01660 | expressed protein; protein id: At2g01660.1              | NA        | NA        | -1.046    | -2.515 |
| A006219_01 | At2g46320 | mitochondrial carrier protein family; protein id: At2g  | -0.43 NA  | NA        | NA        |        |
| A006220_01 | At2g46090 | expressed protein; protein id: At2g46090.1              | 0.35      | 0.273     | -0.054    | 0.326  |
| A006223_01 | At2g26110 | unknown protein; protein id: At2g26110.1                | 0.063     | 0.192     | 0.243     | 0.365  |
| A006226_01 | At2g30200 | putative malonyl-CoA:Acyl carrier protein transacyla    | 1.111     | 1.074     | 0.806     | 1.068  |
| A006227_01 | At2g30230 | hypothetical protein; protein id: At2g30230.1           | -1.599 NA |           | -0.423    | -0.797 |
| A006231_01 | At2g44410 | unknown protein; protein id: At2g44410.1                | -0.668 NA | NA        |           | -0.015 |
| A006233_01 | At2g19940 | putative N-acetyl-gamma-glutamyl-phosphate reduc        | 0.928     | 1.073     | 0.76      | 1.024  |
| A006235_01 | At2g42790 | putative citrate synthase; protein id: At2g42790.1      | -2.412    | -2.359    | -1.393    | -1.099 |
| A006239_01 | At2g01720 | putative ribophorin I; protein id: At2g01720.1          | 0.693     | 0.335     | 0.384     | 1.056  |
| A006242_01 | At2g39450 | unknown protein; protein id: At2g39450.1                | 0.092 NA  | NA        |           | 0.694  |
| A006243_01 | At2g43090 | 3-isopropylmalate dehydratase, small subunit; prote     | 0.677     | 0.651     | 0.587     | 0.86   |
| A006246_01 | At2g35050 | putative protein kinase; protein id: At2g35050.1        | -0.384    | -0.724    | -0.868    | -1.073 |
| A006251_01 | At2g30695 | expressed protein; protein id: At2g30695.1              | 0.773     | 0.934     | 0.795     | 0.749  |
| A006252_01 | At2g20860 | lipoic acid synthase (LIP1); protein id: At2g20860.1    | -0.211    | -0.055    | -0.141    | -0.174 |
| A006253_01 | At2g24180 | cytochrome p450 family; protein id: At2g24180.1         | -1.281 NA |           | -0.952    | -1.141 |
| A006254_01 | At2g20890 | expressed protein; protein id: At2g20890.1              | 0.233     | 0.323     | -0.343    | -0.312 |
| A006257_01 | At2g27960 | CDK-subunit 1; protein id: At2g27960.1                  | -0.098    | 0.245     | 0.383     | -0.071 |
| A006260_01 | At2g28840 | putative RING zinc finger ankyrin protein; protein id:  | -0.358    | -0.293    | -0.744    | -1.108 |
| A006261_01 | At2g46260 | expressed protein; protein id: At2g46260.1              | -0.38     | -0.28     | -0.218    | -0.709 |
| A006263_01 | At2g25710 | biotin holocarboxylase synthetase; protein id: At2g2    | 0.123     | 0.021     | 0.162     | 0.293  |
| A006264_01 | At2g37460 | nodulin-like protein; protein id: At2g37460.1           | -2.608 NA |           | -1.315    | -1.892 |
| A006269_01 | At2g20180 | unknown protein; protein id: At2g20180.1                | -1.13     | -1.271 NA |           | -0.858 |
| A006273_01 | At2g01190 | expressed protein; protein id: At2g01190.1              | -1.377    | -1.094    | -0.937 NA |        |
| A006277_01 | At2g35800 | putative mitochondrial carrier protein; protein id: At2 | -0.41 NA  | NA        |           | -0.92  |
| A006278_01 | At2g30020 | protein phosphatase 2C (PP2C); protein id: At2g300      | -0.891 NA | NA        |           | -0.65  |
| A006282_01 | At2g38740 | expressed protein; protein id: At2g38740.1              | 0.103     | -0.051    | 0.424     | 0.44   |
| A006284_01 | At2g45290 | putative transketolase precursor; protein id: At2g45    | 1.044     | 0.969 NA  |           | 1.048  |
| A006288_01 | At2g03420 | hypothetical protein; protein id: At2g03420.1           | 0.781     | 0.886     | 0.476     | 0.079  |
| A006291_01 | At2g33990 | putative SF16 protein (Helianthus annuus); protein i    | -0.967 NA | NA        |           | -1.126 |
| A006298_01 | At2g41010 | unknown protein; protein id: At2g41010.1                | -0.388 NA |           | 0.187     | 0.032  |
| A006313_01 | At2g19000 | expressed protein; protein id: At2g19000.1              | -0.875    | -0.738 NA | NA        |        |
| A006316_01 | At2g27980 | hypothetical protein; protein id: At2g27980.1           | -0.247 NA | NA        | NA        |        |
| A006323_01 | At2g21190 | putative ER lumen protein retaining receptor; protei    | -0.783    | -0.683    | -0.364    | -0.256 |
| A006324_01 | At2g30170 | expressed protein; protein id: At2g30170.1              | -0.389    | -0.19     | -0.357    | -0.322 |
| A006327_01 | At2g30080 | putative Fe(II) transport protein; protein id: At2g300  | -0.376    | -0.086 NA |           | 0.601  |
| A006329_01 | At2g40850 | hypothetical protein; protein id: At2g40850.1           | -0.35     | -0.497 NA |           | -1.477 |
| A006330_01 | At2g40860 | protein phosphatase 2C (PP2C); protein id: At2g40       | 0.336 NA  | NA        |           | 0.023  |
| A006331_01 | At2g03430 | putative ankyrin; protein id: At2g03430.1               | 0.448     | 0.152 NA  |           | 0.508  |
| A006342_01 | At2g36360 | unknown protein; protein id: At2g36360.1                | 0.02 NA   | NA        |           | -0.045 |
| A006345_01 | At2g26440 | putative pectinesterase; protein id: At2g26440.1        | 0.466     | 0.417     | 0.241     | 0.46   |
| A006350_01 | At2g26510 | putative membrane transporter; protein id: At2g265      | -0.53     | -0.426    | -0.215    | 0.196  |
| A006351_01 | At2g02590 | putative transport protein; protein id: At2g02590.1     | 0.115     | 0.355 NA  |           | 0.013  |
| A006357_01 | At2g41490 | UDP-GlcNAc:dolichol phosphate N-acetylglucosami         | -0.243    | -0.081    | 0.153     | 0.646  |
| A006373_01 | At2g38560 | putative elongation factor; protein id: At2g38560.1     | -0.452 NA |           | -0.909    | -0.669 |
| A006374_01 | At2g44090 | expressed protein; protein id: At2g44090.1              | 0.08      | 0.469     | -0.018    | 1.13   |
| A006378_01 | At2g02730 | expressed protein; protein id: At2g02730.1              | -0.365 NA |           | -0.653    | -0.45  |
| A006384_01 | At2g47410 | hypothetical protein; protein id: At2g47410.1           | -0.057    | -0.165    | -0.392    | -0.049 |
| A006385_01 | At2g44020 | expressed protein; protein id: At2g44020.1              | 0.406     | 0.4 NA    |           | 0.463  |
| A006387_01 | At2g38640 | unknown protein; protein id: At2g38640.1                | -1.824    | -1.747    | -1.141    | -2.589 |
| A006388_01 | At2g43910 | putative methyl chloride transferase; protein id: At2   | -0.197    | -0.028    | 0.211     | 0.478  |
| A006389_01 | At2g32800 | putative protein kinase; protein id: At2g32800.1        | -1.822    | -1.371 NA |           | -1.239 |
| A006400_01 | At2g32650 | expressed protein; protein id: At2g32650.1              | 0.825     | 0.726 NA  |           | 0.142  |
| A006402_01 | At2g42210 | expressed protein; protein id: At2g42210.1              | 0.552     | 0.5       | 0.324     | 0.051  |
| A006419_01 | At2g38730 | putative peptidyl-prolyl cis-trans isomerase; protein   | 0.549     | 0.817     | 0.639     | 0.964  |
| A006421_01 | At2g38230 | similar to SOR1 from the fungus Cercospora nicotia      | -1.595    | -1.073    | -1.12     | -1.732 |
| A006422_01 | At2g18950 | hypothetical protein; protein id: At2g18950.1           | -0.06 NA  |           | -0.1      | 0.085  |
| A006429_01 | At2g01400 | expressed protein; protein id: At2g01400.1              | -0.713    | -0.179 NA | NA        |        |
| A006432_01 | At2g32910 | unknown protein; protein id: At2g32910.1                | -0.249    | -0.351 NA |           | -0.18  |
| A006436_01 | At2g26430 | putative cyclin; protein id: At2g26430.2                | -0.173    | -0.324    | -0.401    | -0.734 |
| A006441_01 | At2g47190 | myb transcription factor (Atmyb2); protein id: At2g4    | NA        | NA        | NA        |        |
| A006442_01 | At2g30610 | unknown protein; protein id: At2g30610.1                | -0.662    | 0.038     | -1.256    | -1.179 |

|            |           |                                                          |           |           |          |        |
|------------|-----------|----------------------------------------------------------|-----------|-----------|----------|--------|
| A006451_01 | At2g30590 | WRKY family transcription factor; protein id: At2g30     | -0.146    | 0.052     | -0.359   | 0.206  |
| A006453_01 | At2g36680 | unknown protein; protein id: At2g36680.1                 | -0.558    | -0.455    | -0.455   | -0.421 |
| A006456_01 | At2g30540 | putative glutaredoxin; protein id: At2g30540.1           | 0.023     | 0.121     | 0.9      | 1.222  |
| A006491_01 | At2g39950 | hypothetical protein; protein id: At2g39950.1            | -0.926    | -0.706 NA | NA       |        |
| A006523_01 | At2g43105 | unknown protein; protein id: At2g43105.1                 | 0.127     | 0.416     | -0.18    | 0.288  |
| A006529_01 | At2g18090 | unknown protein; protein id: At2g18090.1                 | -0.684 NA | NA        |          | -0.474 |
| A006550_01 | At2g45160 | putative scarecrow gene regulator; protein id: At2g4     | -0.624    | -0.57     | -0.068   | -0.089 |
| A006556_01 | At2g17480 | similar to Mlo proteins from H. vulgare; protein id: A   | 0.052     | 0.206     | 0.198    | 0.687  |
| A006564_01 | At2g21270 | putative ubiquitin fusion-degradation protein; proteir   | -0.647    | -0.654    | -0.068   | -0.183 |
| A006565_01 | At2g27200 | putative nucleotide-binding protein; protein id: At2g2   | -0.518    | -0.56     | -0.54    | -0.214 |
| A006567_01 | At2g46600 | putative caltractin; protein id: At2g46600.1             | -1.94     | -1.543    | -0.716   | -1.172 |
| A006568_01 | At2g27180 | expressed protein; protein id: At2g27180.1               | -0.799    | -0.375    | -0.923   | -1.182 |
| A006569_01 | At2g11000 | unknown protein; protein id: At2g11000.1                 | -0.411    | -0.276    | 0.092    | 0.601  |
| A006573_01 | At2g01080 | expressed protein; protein id: At2g01080.1               | -0.213    | 0.263 NA  |          | 0.215  |
| A006574_01 | At2g10450 | 14-3-3 protein (grf15), putative; protein id: At2g1045   | -0.61     | 0.249 NA  |          | 0.041  |
| A006575_01 | At2g32340 | hypothetical protein; protein id: At2g32340.1            | -0.619    | -0.121    | -0.372   | -0.218 |
| A006579_01 | At2g22080 | En/Spm-like transposon protein; protein id: At2g220      | 0.485     | 0.305     | 0.692    | 0.388  |
| A006580_01 | At2g44280 | hypothetical protein; protein id: At2g44280.1            | -0.301    | -0.444    | -0.115   | 0.098  |
| A006581_01 | At2g04240 | putative RING zinc finger protein; protein id: At2g04    | -0.904    | -1.107    | 0.084    | 0.074  |
| A006585_01 | At2g44400 | CHP-rich zinc finger protein, putative; protein id: At2  | -0.921    | 0.029     | -0.624   | 0.174  |
| A006586_01 | At2g44420 | expressed protein; protein id: At2g44420.1               | -0.638    | -0.132    | -0.341   | 0.056  |
| A006595_01 | At2g13350 | hypothetical protein; protein id: At2g13350.1            | -0.241    | -0.611 NA |          | -0.713 |
| A006596_01 | At2g29350 | putative tropinone reductase; protein id: At2g29350.     | -2.683    | -2.235    | -2.496   | -2.016 |
| A006597_01 | At2g29380 | protein phosphatase 2C (PP2C), putative; protein id      | -1.494    | -0.864 NA |          | -0.499 |
| A006598_01 | At2g31270 | hypothetical protein; protein id: At2g31270.1            | -0.956    | -0.291 NA |          | -0.116 |
| A006603_01 | At2g32440 | ent-kaurenoic acid oxidase (cytochrome P450 famil        | -1.368    | -1.204    | -0.89    | -0.924 |
| A006610_01 | At2g22400 | unknown protein; protein id: At2g22400.1                 | 0.255     | 0.252     | 0.033    | 0.01   |
| A006611_01 | At2g45720 | unknown protein; protein id: At2g45720.1                 | -0.516    | -0.449 NA |          | -0.584 |
| A006619_01 | xxxx      | b/t putative ABC transporter; protein id: At2g39190.:    | 0.02      | -0.12     | -0.297   | -0.049 |
| A006622_01 | At2g36710 | pectinesterase family; protein id: At2g36710.1           | -2.622 NA |           | -2.256   | -3.624 |
| A006637_01 | At2g31360 | delta 9 desaturase; protein id: At2g31360.1              | 0.771     | 1.017     | 0.738    | 0.958  |
| A006660_01 | At2g16880 | putative salt-inducible protein; protein id: At2g16880   | 0.311     | 0.44 NA   |          | 0.569  |
| A006664_01 | At2g16920 | putative ubiquitin-conjugating enzyme; protein id: At    | -0.071    | 0.058     | -0.104   | 0.4    |
| A006665_01 | At2g16940 | RRM-containing protein; protein id: At2g16940.1          | -0.006    | -0.136    | 0.058    | 0.099  |
| A006674_01 | At2g26840 | unknown protein; protein id: At2g26840.1                 | 0.403 NA  |           | 0.475    | 0.474  |
| A006676_01 | At2g26860 | F-box protein; protein id: At2g26860.1                   | 0.289 NA  |           | 0.397    | 0.787  |
| A006681_01 | At2g28810 | Dof zinc finger protein; protein id: At2g28810.1         | -1.161    | -1.013 NA |          | -0.641 |
| A006684_01 | At2g19680 | copa-like retroelement pol polyprotein; protein id: A    | 0.855     | 0.88      | 0.566    | 0.345  |
| A006688_01 | At2g19740 | 60S ribosomal protein L31; protein id: At2g19740.1       | 0.351     | 0.502     | 0.41     | -0.029 |
| A006689_01 | At2g32170 | hypothetical protein; protein id: At2g32170.1            | 0.009     | 0.027     | -0.016   | 0.55   |
| A006692_01 | At2g19860 | hexokinase (ATHXK2); protein id: At2g19860.1             | -0.28     | -0.137    | -0.136   | -0.355 |
| A006694_01 | At2g19560 | unknown protein; protein id: At2g19560.1                 | -0.082 NA |           | -0.02    | 0.171  |
| A006696_01 | At2g20410 | expressed protein; protein id: At2g20410.1               | -0.483    | -0.883 NA |          | -0.49  |
| A006708_01 | At2g38820 | expressed protein; protein id: At2g38820.1               | -0.9      | -0.865    | -0.363   | -0.45  |
| A006710_01 | At2g38800 | calmodulin-binding protein; protein id: At2g38800.1      | -1.495    | -1.624    | -0.753   | -0.533 |
| A006715_01 | At2g38780 | hypothetical protein; protein id: At2g38780.1            | -0.131    | -0.259    | -0.245   | -0.264 |
| A006716_01 | At2g17230 | expressed protein; protein id: At2g17230.1               | 1.334     | 1.231     | 0.803    | 1.013  |
| A006724_01 | At2g22680 | copa-like retroelement pol polyprotein; protein id: A    | -1.376    | -1.221    | 0.073    | 0.149  |
| A006726_01 | At2g20340 | putative tyrosine decarboxylase; protein id: At2g203     | 1.07      | 1.014     | 0.66     | 1.293  |
| A006730_01 | At2g40400 | chloroplast lumen common protein family; protein id      | 0.239     | 0.513     | -0.684   | -0.51  |
| A006733_01 | At2g22010 | unknown protein; protein id: At2g22010.1                 | -0.707    | -0.874    | -0.571   | -0.63  |
| A006735_01 | At2g20310 | hypothetical protein; protein id: At2g20310.1            | -0.206 NA | NA        |          | 0.353  |
| A006736_01 | At2g46690 | putative auxin-regulated protein; protein id: At2g466 NA | NA        |           | -2.57 NA |        |
| A006737_01 | At2g20280 | hypothetical protein; protein id: At2g20280.1            | 0.417     | 0.212     | 0.275    | 0.25   |
| A006738_01 | At2g46710 | putative rac GTPase activating protein; protein id: A    | -0.803    | -0.917 NA |          | -0.586 |
| A006742_01 | At2g20270 | putative glutaredoxin; protein id: At2g20270.1           | 0.641     | 0.738     | 0.548    | 0.146  |
| A006744_01 | At2g27260 | expressed protein; protein id: At2g27260.1               | -0.469    | -0.063    | -0.02    | -0.543 |
| A006748_01 | At2g31090 | expressed protein; protein id: At2g31090.1               | -0.463    | -0.069    | 0.276    | -0.271 |
| A006754_01 | At2g27290 | expressed protein; protein id: At2g27290.1               | -0.839    | -0.567    | -0.815   | -1.465 |
| A006755_01 | At2g02220 | leucine-rich repeat transmembrane protein kinase, f      | -0.529 NA | NA        |          | -0.606 |
| A006761_01 | At2g31880 | leucine-rich repeat transmembrane protein kinase, f      | -2.36     | -2.504 NA |          | -1.684 |
| A006763_01 | At2g05160 | RRM-containing protein; protein id: At2g05160.1 NA       | NA        | NA        | NA       | -1.35  |
| A006769_01 | At2g02050 | expressed protein; protein id: At2g02050.1               | 0.258     | 0.341     | 0.434    | 0.12   |
| A006771_01 | At2g35900 | hypothetical protein; protein id: At2g35900.1            | -1.88     | -1.562    | -1.134   | -1.629 |
| A006781_01 | At2g35780 | putative serine carboxypeptidase II; protein id: At2g    | 0.926     | 0.764     | 0.222    | 0.381  |
| A006787_01 | At2g35490 | putative fibrillin; protein id: At2g35490.1              | -0.275 NA |           | -0.333   | -0.933 |
| A006789_01 | At2g04850 | expressed protein; protein id: At2g04850.1               | -0.003    | 0.115 NA  | NA       | NA     |
| A006790_01 | At2g01930 | expressed protein; protein id: At2g01930.1               | -0.704 NA | NA        | NA       | NA     |

|            |           |                                                         |        |        |    |        |        |
|------------|-----------|---------------------------------------------------------|--------|--------|----|--------|--------|
| A006794_01 | At2g01060 | transfactor-like protein; protein id: At2g01060.1       | -0.082 | -0.105 | NA |        | 0.015  |
| A006797_01 | At2g23070 | putative casein kinase II catalytic (alpha) subunit; p  | 0.062  | -0.217 |    | 0.045  | 0.36   |
| A006799_01 | At2g23430 | Kip-related protein 1; protein id: At2g23430.1          | -2.257 | NA     | NA | NA     |        |
| A006800_01 | At2g03890 | expressed protein; protein id: At2g03890.1              | -0.454 | NA     |    | -0.955 | -1.339 |
| A006802_01 | At2g37090 | unknown protein; protein id: At2g37090.1                | -1.754 | -1.931 |    | -1.516 | -1.571 |
| A006803_01 | At2g23460 | putative GTP-binding protein (extra large); protein ic  | -0.584 | -0.344 |    | -0.077 | -0.083 |
| A006804_01 | At2g42680 | expressed protein; protein id: At2g42680.1              | -0.368 | -0.713 |    | -0.263 | -0.587 |
| A006805_01 | At2g45990 | expressed protein; protein id: At2g45990.1              | -0.096 | -0.01  |    | -0.113 | -0.108 |
| A006806_01 | At2g01680 | expressed protein; protein id: At2g01680.1              | -0.834 | -0.715 | NA |        | -0.455 |
| A006808_01 | At2g23420 | unknown protein; protein id: At2g23420.1                | -0.682 | -0.795 |    | -0.214 | -0.107 |
| A006809_01 | At2g38880 | putative CCAAT-binding transcription factor subunit     | 0.113  | 0.291  | NA |        | 0.229  |
| A006811_01 | At2g13360 | alanine-glyoxylate aminotransferase; protein id: At2    | -1.468 | -1.821 |    | -1.153 | -1.657 |
| A006815_01 | At2g44610 | GTP-binding protein, putative; protein id: At2g44610    | 0.137  | -0.085 |    | 0.274  | -0.036 |
| A006816_01 | At2g21870 | putative ATP synthase; protein id: At2g21870.1          | 0.427  | 0.432  |    | 0.451  | 0.621  |
| A006817_01 | At2g14910 | unknown protein; protein id: At2g14910.1                | -1.26  | -1.377 |    | -1.274 | -0.449 |
| A006819_01 | At2g46490 | unknown protein; protein id: At2g46490.1                | -0.321 | -0.239 |    | -0.269 | -0.831 |
| A006821_01 | At2g45640 | expressed protein; protein id: At2g45640.1              | 0.325  | 0.178  |    | 0.291  | 0.407  |
| A006822_01 | At2g25250 | unknown protein; protein id: At2g25250.1                | -0.598 | -0.457 |    | 0.044  | -0.364 |
| A006824_01 | At2g33810 | putative squamosa-promoter binding protein; protei      | 0.418  | NA     |    | 0.575  | 0.741  |
| A006826_01 | At2g19570 | putative cytidine deaminase; protein id: At2g19570.     | -2.369 | -2.362 |    | -0.975 | -0.729 |
| A006827_01 | At2g44210 | expressed protein; protein id: At2g44210.1              | -0.123 | -0.381 |    | -0.409 | -0.174 |
| A006828_01 | At2g26920 | unknown protein; protein id: At2g26920.1                | -0.656 | -0.366 |    | -0.298 | 0.043  |
| A006829_01 | At2g32080 | putative purine-rich single-stranded DNA-binding pr     | -0.63  | -0.783 |    | -0.457 | -0.531 |
| A006830_01 | At2g42890 | meiosis protein mei2, putative; protein id: At2g4289    | NA     | NA     | NA | NA     | NA     |
| A006831_01 | At2g48040 | unknown protein; protein id: At2g48040.1                | -0.061 | -0.151 | NA | NA     | NA     |
| A006832_01 | At2g38270 | expressed protein; protein id: At2g38270.1              | 0.447  | 0.374  |    | 0.125  | -0.219 |
| A006847_01 | At2g29980 | omega-3 fatty acid desaturase, endoplasmic reticul      | 1.354  | 1.331  |    | 1.221  | 1.711  |
| A006849_01 | At2g42830 | floral homeodomain transcription factor (AGL5); pro     | 0.239  | 0.277  |    | 0.672  | 0.859  |
| A006850_01 | At2g32950 | COP1 regulatory protein; protein id: At2g32950.1        | 0.009  | -0.336 | NA |        | 0.35   |
| A006852_01 | At2g04400 | putative indole-3-glycerol phosphate synthase; prote    | 0.348  | 0.15   | NA |        | 0.104  |
| A006854_01 | At2g45810 | DEAD/DEAH box RNA helicase, putative; protein id        | -0.461 | -0.657 |    | -0.312 | -0.452 |
| A006857_01 | At2g34520 | mitochondrial ribosomal protein S14; protein id: At2    | 0.234  | 0.248  |    | 0.44   | 0.329  |
| A006864_01 | At2g19080 | expressed protein; protein id: At2g19080.1              | 0.228  | 0.204  |    | 0.148  | 0.413  |
| A006867_01 | At2g19180 | expressed protein; protein id: At2g19180.1              | -0.192 | -0.259 |    | 0      | -0.151 |
| A006868_01 | At2g40810 | hypothetical protein; protein id: At2g40810.1           | -1.083 | NA     | NA | NA     | NA     |
| A006869_01 | At2g40840 | glycosyl hydrolase family 77 (4-alpha-glucanotransf     | 0.439  | 0.03   |    | -0.367 | -0.301 |
| A006871_01 | At2g40930 | ubiquitin-specific protease 5 (UBP5), putative; prote   | -0.489 | -0.307 |    | -0.274 | 0.039  |
| A006876_01 | At2g03440 | unknown protein; protein id: At2g03440.1                | -0.313 | -0.373 |    | -0.189 | -0.287 |
| A006880_01 | At2g20140 | 26S proteasome subunit 4; protein id: At2g20140.1       | 0.725  | 0.673  |    | 0.291  | 0.403  |
| A006882_01 | At2g41530 | putative esterase D; protein id: At2g41530.1            | -0.046 | 0.04   |    | 0.304  | 0.374  |
| A006885_01 | At2g02710 | putative receptor-like protein kinase; protein id: At2g | -2.655 | -3.257 |    | -1.674 | -1.899 |
| A006890_01 | At2g03470 | putative MYB family transcription factor; protein id: ; | -0.401 | NA     |    | -0.506 | -0.221 |
| A006893_01 | At2g38170 | high affinity Ca2+ antiporter; protein id: At2g38170.   | -1.227 | -1.263 |    | -1.137 | -0.805 |
| A006896_01 | At2g38280 | putative AMP deaminase; protein id: At2g38280.1         | -0.07  | -0.092 |    | -0.132 | 0.029  |
| A006897_01 | At2g32880 | unknown protein; protein id: At2g32880.1                | NA     | NA     |    | -2.076 | NA     |
| A006907_01 | At2g34690 | unknown protein; protein id: At2g34690.1                | -0.712 | -0.735 |    | -0.212 | -0.352 |
| A006913_01 | At2g44670 | high affinity Ca2+ antiporter; protein id: At2g38170.   | -0.044 | 0.134  |    | 0.786  | 0.713  |
| A006918_01 | At2g17980 | putative SEC1 family transport protein; protein id: A   | 0.037  | -0.006 |    | -0.053 | -0.035 |
| A006919_01 | At2g46950 | cytochrome p450, putative; protein id: At2g46950.1      | -3.164 | -3.394 | NA |        | -2.225 |
| A006924_01 | At2g34200 | hypothetical protein; protein id: At2g34200.1           | -0.632 | -0.63  | NA | NA     | NA     |
| A006928_01 | At2g34350 | nodulin-like protein; protein id: At2g34350.1           | 0.824  | 0.501  |    | 0.53   | 0.971  |
| A006935_01 | At2g26170 | thromboxane-A synthase(cytochrome p450 family),         | -1.008 | -1.222 | NA |        | -0.1   |
| A006937_01 | At2g26210 | unknown protein; protein id: At2g26210.1                | -0.341 | -0.384 |    | -0.213 | -0.528 |
| A006944_01 | At2g44490 | glycosyl hydrolase family 1; protein id: At2g44490.1    | -1.639 | -2.035 |    | -2.641 | -3.014 |
| A006948_01 | At2g07360 | unknown protein; protein id: At2g07360.1                | 0.374  | 0.263  |    | 0.132  | 0.179  |
| A006949_01 | At2g45710 | putative ribosomal protein S27; protein id: At2g4571    | 0.586  | 0.722  |    | 0.733  | 0.106  |
| A006954_01 | At2g39340 | unknown protein; protein id: At2g39340.1                | -0.401 | -1.224 |    | -1.227 | -0.908 |
| A006959_01 | At2g22870 | putative nucleotide-binding protein; protein id: At2g2  | 0.552  | 0.704  |    | 0.575  | 0.988  |
| A006971_01 | At2g19880 | expressed protein; protein id: At2g19880.1              | NA     | NA     | NA |        | -0.497 |
| A006972_01 | At2g32230 | hypothetical protein; protein id: At2g32230.1           | 1.31   | 0.916  |    | 0.521  | 1.007  |
| A006974_01 | At2g23900 | polygalacturonase, putative; protein id: At2g23900.1    | -0.15  | NA     | NA | NA     | NA     |
| A006975_01 | At2g46680 | homeodomain transcription factor (ATHB-7); proteir      | -2.422 | -2.899 |    | -1.968 | -2.186 |
| A006984_01 | At2g47790 | expressed protein; protein id: At2g47790.1              | 0.351  | 0.256  |    | 0.495  | 0.504  |
| A006988_01 | At2g47940 | DegP2 protease; protein id: At2g47940.1                 | 0.936  | 0.599  |    | 0.293  | 0.693  |
| A006992_01 | At2g46800 | putative zinc transporter; protein id: At2g46800.1      | -0.524 | -0.535 |    | 0.029  | -0.162 |
| A007000_01 | At2g02370 | expressed protein; protein id: At2g02370.1              | -1.118 | -1.133 |    | -0.677 | -0.33  |
| A007002_01 | At2g02400 | putative cinnamoyl-CoA reductase; protein id: At2g      | -0.195 | NA     |    | 0.386  | 0.514  |
| A007010_01 | At2g35540 | putative DnaJ protein; protein id: At2g35540.1          | -0.301 | NA     | NA |        | -0.162 |

|            |           |                                                         |        |        |        |        |
|------------|-----------|---------------------------------------------------------|--------|--------|--------|--------|
| A007017_01 | At2g29090 | taxane 13-alpha-hydroxylase(cytochrome p450 fami        | NA     | NA     | NA     |        |
| A007021_01 | At2g25870 | A.t. chromosome II section 126 of 255 of the compl      | 0.692  | 0.57   | 0.211  | 0.452  |
| A007023_01 | At2g14880 | expressed protein; protein id: At2g14880.1              | 0.747  | 0.681  | 0.585  | 0.465  |
| A007045_01 | At2g01440 | ATP-dependent DNA helicase, putative; protein id: ,     | -0.111 | -0.309 | NA     | NA     |
| A007051_01 | At2g27040 | Argonaute (AGO1)-like protein; protein id: At2g2704     | 1.681  | 1.371  | 1.163  | 1.749  |
| A007052_01 | At2g27090 | hypothetical protein; protein id: At2g27090.1           | -0.827 | -0.848 | NA     | -0.683 |
| A007054_01 | At2g37050 | putative receptor-like protein kinase; protein id: At2g | 0.286  | 0.243  | 0.264  | 0.389  |
| A007058_01 | At2g32290 | glycosyl hydrolase family 14 (beta-amylase); proteir    | NA     | NA     | NA     | NA     |
| A007061_01 | At2g37120 | expressed protein; protein id: At2g37120.1              | 1.15   | 1.196  | 0.917  | 0.86   |
| A007062_01 | At2g37160 | DMR protein, putative; protein id: At2g37160.1          | -0.149 | NA     | -0.074 | -0.214 |
| A007064_01 | At2g38870 | putative protease inhibitor; protein id: At2g38870.1    | -0.547 | -0.405 | -0.308 | -0.832 |
| A007067_01 | At2g38980 | unknown protein; protein id: At2g38980.1                | -0.275 | -0.293 | -0.366 | -0.289 |
| A007073_01 | At2g16660 | nodulin-like protein; protein id: At2g16660.1           | -0.903 | -0.998 | -0.812 | -0.823 |
| A007075_01 | At2g21180 | expressed protein; protein id: At2g21180.1              | -1.97  | -1.909 | -0.572 | -1.9   |
| A007087_01 | At2g02080 | putative C2H2-type zinc finger protein; protein id: At  | -0.331 | NA     | -0.465 | -0.167 |
| A007090_01 | At2g02180 | expressed protein; protein id: At2g02180.1              | -0.779 | -0.53  | -0.922 | -0.967 |
| A007093_01 | At2g42390 | expressed protein; protein id: At2g42390.1              | 0.091  | 0.109  | 0.137  | 0.046  |
| A007098_01 | At2g06510 | putative replication protein A1; protein id: At2g0651   | 0.046  | -0.339 | NA     | NA     |
| A007103_01 | At2g18410 | hypothetical protein; protein id: At2g18410.1           | 0.439  | 0.713  | 0.168  | 0.589  |
| A007112_01 | At2g31820 | ankyrin-like protein; protein id: At2g31820.1           | -0.547 | -0.718 | -0.599 | -0.478 |
| A007117_01 | At2g20330 | putative WD-40 repeat protein; protein id: At2g2033     | 0.35   | -0.053 | NA     | -0.156 |
| A007119_01 | At2g24860 | expressed protein; protein id: At2g24860.1              | -0.698 | -0.579 | -0.369 | -0.541 |
| A007130_01 | At2g03750 | putative steroid sulfotransferase; protein id: At2g037  | 0.012  | 0.04   | 0.205  | -0.089 |
| A007131_01 | At2g03800 | unknown protein; protein id: At2g03800.1                | -0.173 | NA     | NA     | -0.53  |
| A007132_01 | At2g21240 | expressed protein; protein id: At2g21240.1              | -0.376 | NA     | -0.291 | -0.074 |
| A007142_01 | At2g36250 | plastid division protein (FtsZ); protein id: At2g36250  | 0.389  | 0.408  | 0.169  | 0.46   |
| A007148_01 | At2g42750 | expressed protein; protein id: At2g42750.1              | -1.819 | -2.025 | -1.247 | -1.961 |
| A007152_01 | At2g04540 | 3-oxoacyl carrier protein synthase; protein id: At2g0   | 0.177  | NA     | NA     | 0.308  |
| A007153_01 | At2g04550 | putative protein phosphatase; protein id: At2g04550     | -0.39  | -0.218 | 0.07   | -0.285 |
| A007158_01 | At2g04740 | unknown protein; protein id: At2g04740.1                | -0.107 | NA     | NA     | 0.16   |
| A007167_01 | At2g21900 | WRKY family transcription factor; protein id: At2g21    | -0.265 | -0.542 | -0.27  | -0.223 |
| A007169_01 | At2g40380 | unknown protein; protein id: At2g40380.1                | 0.089  | 0.119  | 0.262  | -0.037 |
| A007170_01 | At2g40410 | hypothetical protein; protein id: At2g40410.1           | -0.315 | -0.389 | -0.124 | -0.285 |
| A007173_01 | At2g16070 | expressed protein; protein id: At2g16070.1              | -0.381 | -0.321 | 0.108  | -0.044 |
| A007183_01 | At2g36990 | putative RNA polymerase sigma-70 factor; protein id     | 0.522  | 0.16   | -0.068 | -0.074 |
| A007211_01 | At2g33770 | hypothetical protein; protein id: At2g33770.1           | -0.45  | -0.495 | -0.39  | -0.876 |
| A007218_01 | At5g15220 | ribosomal protein L27 - like; protein id: At5g15220.1   | 1.236  | 1.515  | 0.981  | 1.434  |
| A007219_01 | At2g04030 | putative heat shock protein; protein id: At2g04030.1    | 1.1    | 1.017  | 0.454  | 0.613  |
| A007221_01 | At2g47490 | mitochondrial carrier protein family; protein id: At2g  | -0.192 | -0.351 | 0.218  | NA     |
| A007222_01 | At2g41620 | expressed protein; protein id: At2g41620.1              | 0.02   | 0.038  | -0.333 | 0.074  |
| A007225_01 | At2g18910 | expressed protein; protein id: At2g18910.1              | 0.689  | 0.906  | 0.643  | 0.448  |
| A007228_01 | At2g45540 | unknown protein; protein id: At2g45540.1                | 0.199  | 0.184  | 0.285  | 0.253  |
| A007234_01 | xxxx      | b/t unknown protein; protein id: At2g02510.1 and Ex     | 0.112  | 0.194  | 0.065  | 0.213  |
| A007242_01 | At2g30120 | expressed protein; protein id: At2g30120.1              | -0.133 | 0      | NA     | -0.042 |
| A007243_01 | At2g39360 | putative protein kinase; protein id: At2g39360.1        | -0.933 | -1.101 | NA     | -1.779 |
| A007245_01 | At2g39520 | hypothetical protein; protein id: At2g39520.1           | 0.667  | 0.468  | NA     | 0.356  |
| A007246_01 | At2g34870 | expressed protein; protein id: At2g34870.1              | 0.786  | 0.614  | 0.455  | 0.669  |
| A007250_01 | At2g35130 | hypothetical protein; protein id: At2g35130.1           | -0.323 | -0.347 | -0.423 | -0.208 |
| A007251_01 | At2g23610 | putative acetone-cyanohydrin lyase; protein id: At2g    | -0.059 | NA     | -0.507 | -1.021 |
| A007252_01 | At2g37990 | expressed protein; protein id: At2g37990.1              | 0.567  | 0.697  | 0.182  | 0.7    |
| A007255_01 | At2g35610 | unknown protein; protein id: At2g35610.1                | 0.266  | 0.323  | 0.039  | 0.225  |
| A007256_01 | At2g46270 | G-box binding bZIP transcription factor; protein id: A  | -0.252 | NA     | NA     | 0.056  |
| A007258_01 | At2g32700 | expressed protein; protein id: At2g32700.1              | -0.586 | -0.088 | -0.266 | 0.112  |
| A007259_01 | At2g20420 | succinyl-CoA ligase beta subunit; protein id: At2g20    | 0.759  | 0.286  | 0.359  | 1.156  |
| A007260_01 | At2g23600 | putative acetone-cyanohydrin lyase; protein id: At2g    | -1.015 | -1.078 | -0.715 | -1.264 |
| A007262_01 | At2g02420 | unknown protein; protein id: At2g02420.1                | -0.057 | 0.176  | 0.04   | 0.076  |
| A007265_01 | At2g46580 | expressed protein; protein id: At2g46580.1              | 0.063  | -0.006 | 0.1    | -0.383 |
| A007266_01 | At2g46560 | hypothetical protein; protein id: At2g46560.1           | 0.103  | -0.156 | -0.121 | -0.066 |
| A007268_01 | At2g44100 | GDP dissociation inhibitor; protein id: At2g44100.1     | -0.486 | -0.672 | -0.281 | 0.021  |
| A007272_01 | At2g38020 | putative vacuolar protein sorting-associated protein;   | -0.72  | NA     | -0.828 | -0.607 |
| A007273_01 | At2g15690 | expressed protein; protein id: At2g15690.1              | 0.499  | NA     | 0.549  | 1.027  |
| A007274_01 | At2g39780 | S-like ribonuclease RNS2; protein id: At2g39780.1       | -0.456 | -0.571 | -0.335 | -0.543 |
| A007275_01 | At2g01540 | hypothetical protein; protein id: At2g01540.1           | -0.508 | NA     | -0.286 | -0.931 |
| A007277_01 | At2g25750 | unknown protein; protein id: At2g25750.1                | -0.151 | -0.229 | -0.227 | -0.099 |
| A007278_01 | At2g42320 | unknown protein; protein id: At2g42320.1                | 0.111  | 0.238  | 0.149  | 0.432  |
| A007279_01 | At2g27230 | expressed protein; protein id: At2g27230.1              | -0.074 | NA     | 0.04   | 0.14   |
| A007280_01 | At2g30950 | FtsH protease (VAR2); protein id: At2g30950.1           | -0.153 | -0.86  | -0.775 | -0.337 |
| A007281_01 | At2g15240 | expressed protein; protein id: At2g15240.1              | -0.39  | -0.003 | -0.142 | -0.316 |

|            |           |                                                         |        |        |        |        |
|------------|-----------|---------------------------------------------------------|--------|--------|--------|--------|
| A007283_01 | At2g24820 | putative Rieske iron-sulfur protein; protein id: At2g2  | -0.896 | -1.346 | -0.973 | -0.872 |
| A007284_01 | At2g19310 | putative small heat shock protein; protein id: At2g19   | -1.126 | NA     | -0.633 | -1.229 |
| A007285_01 | At2g23120 | expressed protein; protein id: At2g23120.1              | -0.511 | -0.652 | -0.335 | -0.609 |
| A007287_01 | At2g16600 | cytosolic cyclophilin (ROC3); protein id: At2g16600.    | 0.525  | 0.231  | 0.039  | 0.051  |
| A007288_01 | At2g02160 | expressed protein; protein id: At2g02160.1              | -0.281 | -0.53  | -0.599 | -0.805 |
| A007290_01 | At2g01250 | putative ribosomal protein L7; protein id: At2g01250    | 1.025  | 0.671  | 0.745  | 0.75   |
| A007291_01 | At2g22470 | arabinogalactan-protein (AGP2); protein id: At2g224     | -1.092 | -0.591 | 0.019  | -0.681 |
| A007293_01 | At2g26500 | expressed protein; protein id: At2g26500.1              | -0.407 | -0.559 | -0.142 | -0.618 |
| A007294_01 | At2g28720 | putative histone H2B; protein id: At2g28720.1           | -1.206 | -1.492 | -1.776 | -2.608 |
| A007297_01 | At2g40600 | expressed protein; protein id: At2g40600.1              | -0.449 | -0.275 | 0.132  | 0.022  |
| A007298_01 | At2g38610 | KH domain protein; protein id: At2g38610.1              | -0.373 | -0.194 | -0.107 | -0.354 |
| A007299_01 | At2g35470 | expressed protein; protein id: At2g35470.1              | 0.118  | -0.149 | -0.085 | -0.201 |
| A007300_01 | At2g44060 | similar to late embryogenesis abundant proteins; pr     | 0.669  | 0.571  | 0.55   | 1.009  |
| A007302_01 | At2g31750 | putative glucosyltransferase; protein id: At2g31750.    | -1.56  | -1.364 | -0.999 | -0.637 |
| A007303_01 | At2g21390 | coatamer alpha subunit; protein id: At2g21390.1         | 0.085  | 0.085  | 0.071  | 0.206  |
| A007305_01 | At2g28950 | expansin, putative; protein id: At2g28950.1             | 2.086  | 1.604  | 1.515  | 2.389  |
| A007306_01 | At2g05100 | light-harvesting chlorophyll a/b binding protein; prote | -0.647 | -0.718 | -0.723 | -0.839 |
| A007307_01 | At2g39760 | expressed protein; protein id: At2g39760.1              | 0.352  | 0.133  | 0.102  | 0.599  |
| A007309_01 | At4g37680 | expressed protein; protein id: At4g37680.1              | -0.265 | -0.051 | 0.052  | 0.263  |
| A007310_01 | At2g13100 | putative membrane transporter; protein id: At2g1310     | -0.248 | NA     | -0.282 | -0.174 |
| A007311_01 | At2g25900 | putative CCCH-type zinc finger protein; protein id: A   | -0.915 | -0.805 | -0.02  | -0.149 |
| A007313_01 | At2g26730 | leucine-rich repeat transmembrane protein kinase, p     | 1.045  | 1.201  | 0.667  | 1.209  |
| A007314_01 | At2g28910 | expressed protein; protein id: At2g28910.1              | -0.694 | -0.746 | -0.742 | -0.559 |
| A007315_01 | At2g18440 | unknown protein; protein id: At2g18440.1                | -0.945 | -1.232 | -0.787 | -0.537 |
| A007317_01 | At2g21960 | expressed protein; protein id: At2g21960.1              | -0.59  | NA     | -0.52  | -0.656 |
| A007318_01 | At2g31390 | putative fructokinase; protein id: At2g31390.1          | 0.775  | 0.802  | 0.562  | 0.682  |
| A007320_01 | At2g24790 | CONSTANS B-box zinc finger family protein; proteir      | -0.309 | -0.206 | 0.001  | -0.143 |
| A007322_01 | At2g27190 | purple acid phosphatase precursor; protein id: At2g;    | 0.145  | -0.304 | 0.072  | 0.495  |
| A007324_01 | At2g03270 | putative helicase; protein id: At2g03270.1              | -0.703 | NA     | NA     | 0.259  |
| A007325_01 | At2g45820 | remorin; protein id: At2g45820.1                        | -1.074 | -1.088 | -0.537 | -1.499 |
| A007327_01 | At2g26080 | putative glycine dehydrogenase; protein id: At2g260     | -0.756 | -0.558 | -0.292 | -0.475 |
| A007331_01 | At2g47590 | photolyase/blue-light receptor (PHR2); protein id: At   | 0.787  | 0.813  | 0.69   | 0.84   |
| A007333_01 | At2g29540 | DNA-directed RNA polymerase 14 kDa subunit (AtF         | 0.947  | 0.946  | 1.041  | 0.73   |
| A007334_01 | At2g14750 | putative adenosine phosphosulfate kinase; protein i     | -1.112 | -1.275 | -0.447 | -0.919 |
| A007335_01 | At2g43680 | putative SF16 protein {Helianthus annuus}; protein i    | -0.561 | -0.94  | -0.113 | -0.615 |
| A007336_01 | At2g28400 | hypothetical protein; protein id: At2g28400.1           | -2.814 | -2.691 | -0.69  | -1.846 |
| A007338_01 | At2g29530 | expressed protein; protein id: At2g29530.1              | 1.087  | 0.956  | 0.913  | 0.749  |
| A007340_01 | At2g25570 | expressed protein; protein id: At2g25570.1              | 0.552  | 0.456  | 0.511  | 0.695  |
| A007341_01 | At2g38290 | putative ammonium transporter; protein id: At2g382      | -0.036 | -0.033 | -0.191 | -0.263 |
| A007342_01 | At2g17280 | unknown protein; protein id: At2g17280.1                | 1.239  | 1.168  | 1.071  | 1.18   |
| A007347_01 | At2g23320 | WRKY family transcription factor; protein id: At2g23    | -1.612 | -1.402 | -1.041 | -0.557 |
| A007348_01 | At2g20990 | expressed protein; protein id: At2g20990.1              | 0.188  | 0.141  | -0.364 | -0.03  |
| A007349_01 | At2g28430 | expressed protein; protein id: At2g28430.1              | 0.213  | 0.509  | 0.405  | 0.35   |
| A007351_01 | At2g33360 | hypothetical protein; protein id: At2g33360.1           | -0.699 | -0.537 | -0.757 | -0.593 |
| A007353_01 | At2g32870 | unknown protein; protein id: At2g32870.1                | NA     | NA     | NA     | -3.849 |
| A007354_01 | At2g33490 | unknown protein; protein id: At2g33490.1                | -0.505 | NA     | NA     | NA     |
| A007357_01 | At2g37190 | 60S ribosomal protein L12; protein id: At2g37190.1      | 0.891  | 0.81   | 0.982  | 1.113  |
| A007361_01 | At2g20960 | pEARL1 4 protein; protein id: At2g20960.1               | -0.722 | -0.788 | -0.596 | -0.506 |
| A007362_01 | At2g33830 | auxin-regulated protein; protein id: At2g33830.1        | -2.686 | -2.956 | -1.836 | -2.765 |
| A007363_01 | At2g03640 | NTF2-containing RNA-binding protein, putative; prot     | 0.011  | 0.167  | 0.107  | 0.307  |
| A007364_01 | At2g03120 | expressed protein; protein id: At2g03120.1              | 0.338  | 0.049  | 0.046  | 0.514  |
| A007365_01 | At2g43340 | unknown protein; protein id: At2g43340.1                | -1.161 | NA     | -0.095 | -0.239 |
| A007366_01 | At2g17760 | putative chloroplast nucleoid DNA-binding protein; p    | -0.86  | NA     | -0.44  | -0.456 |
| A007367_01 | At2g36830 | putative aquaporin (tonoplast intrinsic protein gamm    | 0.975  | 0.804  | 0.224  | 0.204  |
| A007370_01 | At2g37270 | 40S ribosomal protein S5; protein id: At2g37270.1       | 0.613  | 0.244  | 0.38   | 0.191  |
| A007372_01 | At2g36530 | enolase (2-phospho-D-glycerate hydrolyase); protei      | 0.237  | 0.311  | 0.356  | 0.629  |
| A007373_01 | At2g44650 | chloroplast chaperonin 10; protein id: At2g44650.1      | 0.442  | 0.673  | 0.45   | 0.558  |
| A007375_01 | At2g15830 | unknown protein; protein id: At2g15830.1                | -0.48  | -0.192 | -0.288 | -0.537 |
| A007379_01 | At2g43330 | putative membrane transporter; protein id: At2g433;     | -0.454 | -0.356 | -0.495 | -0.032 |
| A007382_01 | At2g35750 | snoRNA gene; protein id: At2g35750.1                    | -0.615 | -0.323 | -0.025 | -0.076 |
| A007383_01 | At2g20630 | protein phosphatase 2C (PP2C); protein id: At2g206      | -0.39  | -0.595 | -0.74  | -1.091 |
| A007384_01 | At2g34630 | geranyl diphosphate synthase (GPPS)(dimethylallyl       | -0.162 | -0.13  | 0.02   | 0.511  |
| A007385_01 | At2g40460 | putative PTR2 family peptide transporter; protein id:   | -0.623 | -1.043 | -0.741 | -1.011 |
| A007386_01 | At2g44150 | expressed protein; protein id: At2g44150.1              | 0.03   | -0.249 | 0.225  | 0.572  |
| A007387_01 | At2g24020 | expressed protein; protein id: At2g24020.1              | 0.819  | 0.472  | 0.247  | -0.022 |
| A007394_01 | At2g27580 | putative zinc finger protein; protein id: At2g27580.1   | -0.562 | NA     | -0.001 | -0.511 |
| A007395_01 | At2g43170 | unknown protein; protein id: At2g43170.1                | -0.589 | -0.341 | -0.544 | -1.211 |
| A007405_01 | At2g03400 | unknown protein; protein id: At2g03400.1                | -0.401 | -0.884 | -0.419 | -0.422 |

|            |           |                                                                                        |           |           |           |        |
|------------|-----------|----------------------------------------------------------------------------------------|-----------|-----------|-----------|--------|
| A007406_01 | At2g01710 | expressed protein; protein id: At2g01710.1                                             | -0.229    | -0.2      | 0.054     | -0.179 |
| A007409_01 | At2g38580 | hypothetical protein; protein id: At2g38580.1                                          | 1.309     | 0.792     | 0.667     | 1.089  |
| A007414_01 | At2g30360 | putative protein kinase; protein id: At2g30360.1                                       | -0.584    | -0.348    | -0.179    | -0.194 |
| A007422_01 | At2g48020 | putative sugar transporter; protein id: At2g48020.1                                    | -1.302    | -1.162    | -0.669    | -1.059 |
| A007424_01 | At2g33890 | overlap between T1B8 and T14G11; protein id: At2g33890.1                               | -0.622 NA | NA        | NA        | NA     |
| A007428_01 | At2g16990 | putative tetracycline transporter protein; protein id: At2g16990.1                     | 0.388     | 0.458     | 0.543     | 0.866  |
| A007429_01 | At2g26690 | putative nitrate transporter; protein id: At2g26690.1                                  | -2.299 NA |           | -1.441    | -2.529 |
| A007430_01 | At2g29700 | hypothetical protein; protein id: At2g29700.1                                          | -0.154    | 0.003     | 0.195     | 0.096  |
| A007431_01 | At2g28200 | putative zinc-finger protein; protein id: At2g28200.1                                  | -1.084    | -1.106    | -0.337    | -0.742 |
| A007433_01 | At2g45220 | pectinesterase family; protein id: At2g45220.1                                         | -2.747    | -3.094    | -1.792    | -2.946 |
| A007434_01 | At2g45770 | putative signal recognition particle receptor (alpha subunit); protein id: At2g45770.1 | 0.295     | 0.273     | 0.039     | -0.053 |
| A007435_01 | At2g45270 | putative O-sialoglycoprotein endopeptidase; protein id: At2g45270.1                    | 0.431     | 0.384 NA  |           | 0.346  |
| A007436_01 | At2g45340 | leucine-rich repeat transmembrane protein kinase; protein id: At2g45340.1              | -0.579 NA | NA        |           | 0.362  |
| A007438_01 | At2g30970 | aspartate aminotransferase (AAT1); protein id: At2g30970.1                             | 0.504     | 0.417     | 0.207     | 0.903  |
| A007442_01 | At2g39350 | ABC transporter family protein; protein id: At2g39350.1                                | -0.243    | 0.075     | -0.243    | 0.091  |
| A007445_01 | At2g39170 | unknown protein; protein id: At2g39170.1                                               | -0.164    | -0.08     | -0.129    | -0.091 |
| A007459_01 | At2g44480 | glycosyl hydrolase family 1; protein id: At2g44480.1                                   | -0.603 NA | NA        |           | 0.081  |
| A007468_01 | At2g46700 | putative calcium-dependent protein kinase; protein id: At2g46700.1                     | -0.006 NA | NA        |           | -0.135 |
| A007475_01 | At2g05790 | glycosyl hydrolase family 17; protein id: At2g05790.1                                  | 1.563     | 1.303     | 1.235     | 1.47   |
| A007479_01 | At2g26310 | hypothetical protein; protein id: At2g26310.1                                          | -0.301    | -0.484 NA | NA        | NA     |
| A007484_01 | At2g26240 | unknown protein; protein id: At2g26240.1                                               | -0.246    | -0.174    | 0.213     | -0.488 |
| A007485_01 | At2g19470 | putative casein kinase I; protein id: At2g19470.1                                      | 0.259     | 0.044     | -0.105    | 0.32   |
| A007498_01 | At2g17510 | putative mitotic control protein dis3; protein id: At2g17510.1                         | -0.209    | -0.164 NA |           | -0.435 |
| A007499_01 | At2g17520 | putative protein kinase/endoribonuclease; protein id: At2g17520.1                      | -0.494    | -0.691    | -0.713    | -0.22  |
| A007502_01 | At2g17570 | undecaprenyl pyrophosphate synthetase (UPP synthase); protein id: At2g17570.1          | -0.969    | -0.869 NA | NA        | NA     |
| A007508_01 | At2g23670 | expressed protein; protein id: At2g23670.1                                             | 0.364     | 0.566     | 0.597     | 0.108  |
| A007510_01 | At2g38850 | unknown protein; protein id: At2g38850.1                                               | -0.05     | 0.179     | 0.028     | 0.554  |
| A007513_01 | At2g40660 | putative methionyl-tRNA synthetase; protein id: At2g40660.1                            | 0.653     | 0.636     | 0.685     | 1.126  |
| A007519_01 | At2g40780 | putative translation initiation factor; protein id: At2g40780.1                        | 0.455     | 0.599 NA  |           | 0.877  |
| A007520_01 | At2g24860 | expressed protein; protein id: At2g24860.1                                             | -0.651    | -0.403    | -0.265    | -0.59  |
| A007521_01 | At2g15860 | unknown protein; protein id: At2g15860.1                                               | 0.628     | 0.437     | 0.452     | 0.754  |
| A007522_01 | At2g37200 | unknown protein; protein id: At2g37200.1                                               | -0.241    | -0.097    | 0.178     | -0.368 |
| A007524_01 | At2g18100 | unknown protein; protein id: At2g18100.1                                               | -0.176    | -0.536 NA |           | -0.583 |
| A007526_01 | At2g15900 | hypothetical protein; protein id: At2g15900.1                                          | -0.432 NA | NA        | NA        | NA     |
| A007530_01 | At2g03550 | putative esterase; protein id: At2g03550.1                                             | -1.416 NA |           | -0.61     | -1.24  |
| A007535_01 | At2g15960 | expressed protein; protein id: At2g15960.1                                             | -2.596    | -2.398    | -1.976    | -2.646 |
| A007537_01 | At2g01350 | NADC homolog; protein id: At2g01350.1                                                  | -0.06     | -0.206    | -0.379    | -0.259 |
| A007548_01 | At2g41090 | calcium binding protein (CaBP-22); protein id: At2g41090.1                             | -1.553    | -1.769    | -0.723    | -1.016 |
| A007549_01 | At2g39960 | unknown protein; protein id: At2g39960.1                                               | 0.32      | 0.267     | 0.06      | 0.071  |
| A007554_01 | At2g44680 | putative casein kinase II beta subunit; protein id: At2g44680.1                        | -0.361 NA |           | -0.182    | -0.245 |
| A007555_01 | At2g44640 | expressed protein; protein id: At2g44640.1                                             | 1.156 NA  |           | 0.728     | 1.122  |
| A007564_01 | At2g26680 | expressed protein; protein id: At2g26680.1                                             | 0.791     | 0.907 NA  |           | 0.786  |
| A007565_01 | At2g26660 | unknown protein; protein id: At2g26660.1                                               | -0.572 NA |           | -0.166    | -0.255 |
| A007567_01 | At2g01230 | unknown protein; protein id: At2g01230.1                                               | -0.119    | -0.036    | 0.095     | 0.328  |
| A007573_01 | At2g41890 | putative receptor-like protein kinase; protein id: At2g41890.1                         | 0.632     | 0.391 NA  |           | 0.495  |
| A007575_01 | At2g28540 | unknown protein; protein id: At2g28540.1                                               | -0.167    | -0.195    | -0.078    | 0.092  |
| A007577_01 | At2g42010 | phospholipase D (PLDbeta); protein id: At2g42010.1                                     | -0.449    | -0.67 NA  |           | -1.109 |
| A007582_01 | At2g30470 | putative VP1/ABI3 family regulatory protein; protein id: At2g30470.1                   | -0.149    | -0.471 NA |           | -0.345 |
| A007584_01 | At2g30530 | expressed protein; protein id: At2g30530.1                                             | -0.54     | -0.292    | -0.324    | -0.433 |
| A007589_01 | At2g03510 | expressed protein; protein id: At2g03510.1                                             | 0.607     | 0.211     | 0.074     | 0.475  |
| A007590_01 | At2g23450 | putative protein kinase; protein id: At2g23450.1                                       | -2.03     | -2.002    | -0.897    | -1.106 |
| A007593_01 | At2g33620 | AT-hook DNA-binding protein (AHP1); protein id: At2g33620.1                            | 0.633     | 0.398     | 0.43      | 0.743  |
| A007596_01 | At2g23390 | hypothetical protein; protein id: At2g23390.1                                          | -0.667 NA |           | -0.784    | -0.698 |
| A007597_01 | At2g37480 | expressed protein; protein id: At2g37480.1                                             | -0.213    | -0.428    | -0.178    | -0.334 |
| A007599_01 | At2g18290 | expressed protein; protein id: At2g18290.1                                             | -0.119    | -0.11 NA  |           | -0.71  |
| A007600_01 | At2g21280 | expressed protein; protein id: At2g21280.1                                             | 0.569     | 0.333     | 0.17      | 0.062  |
| A007604_01 | At2g04795 | expressed protein; protein id: At2g04795.1                                             | NA        | NA        | -2.228 NA | NA     |
| A007606_01 | At2g20360 | putative NADH-ubiquinone oxidoreductase; protein id: At2g20360.1                       | 0.767     | 0.165     | 0.31      | 0.984  |
| A007616_01 | At2g18940 | putative salt-inducible protein; protein id: At2g18940.1                               | 0.481     | 0.471     | -0.019    | -0.079 |
| A007618_01 | At2g38080 | laccase (diphenol oxidase), putative; protein id: At2g38080.1                          | -2.458    | -2.382    | -1.62     | -2.591 |
| A007620_01 | At2g31190 | expressed protein; protein id: At2g31190.1                                             | 0.07      | 0.22      | -0.09     | 0.155  |
| A007621_01 | At2g18600 | RUB1-conjugating enzyme, putative; protein id: At2g18600.1                             | -0.166 NA |           | -0.008    | -0.2   |
| A007622_01 | At2g18330 | putative AAA-type ATPase; protein id: At2g18330.1                                      | 0.98      | 1.137     | 0.914     | 1.742  |
| A007627_01 | At2g42220 | rhodanese-like domain protein; protein id: At2g42220.1                                 | 1.514     | 0.963     | 0.437     | 0.785  |
| A007630_01 | At2g17870 | putative glycine-rich, zinc-finger DNA-binding protein; protein id: At2g17870.1        | -0.314    | 0.096     | 0.196     | 0.121  |
| A007644_01 | At2g43900 | putative inositol polyphosphate 5'-phosphatase; protein id: At2g43900.1                | 0.295 NA  | NA        |           | 0.383  |
| A007646_01 | At2g47440 | unknown protein; protein id: At2g47440.1                                               | 0.126     | 0.106     | 0.381     | 0.877  |
| A007648_01 | At2g43950 | expressed protein; protein id: At2g43950.1                                             | 0.041     | -0.128    | -0.186    | 0.038  |



|            |           |                                                                               |        |        |        |        |
|------------|-----------|-------------------------------------------------------------------------------|--------|--------|--------|--------|
| A007649_01 | At2g46620 | hypothetical protein; protein id: At2g46620.1                                 | -0.726 | -0.449 | NA     | -0.697 |
| A007651_01 | At2g47420 | putative dimethyladenosine transferase; protein id: At2g47420.1               | -0.097 | 0.05   | 0.14   | -0.301 |
| A007654_01 | At2g44080 | unknown protein; protein id: At2g44080.1                                      | -0.517 | -1.035 | -0.468 | -0.813 |
| A007656_01 | At2g44130 | expressed protein; protein id: At2g44130.1                                    | -2.384 | NA     | -0.64  | -1.098 |
| A007657_01 | At2g44140 | AtAPG4a; unknown protein; protein id: At2g44140.1                             | -0.81  | -0.673 | -0.23  | -0.636 |
| A007659_01 | At2g41680 | putative thioredoxin reductase; protein id: At2g41680.1                       | 0.136  | -0.18  | NA     | -0.005 |
| A007665_01 | At2g41600 | hypothetical protein; protein id: At2g41600.1                                 | 0.048  | 0.237  | 0.332  | 0.457  |
| A007680_01 | At2g02630 | CHP-rich zinc finger protein, putative; protein id: At2g02630.1               | -0.558 | -0.45  | -0.858 | -0.578 |
| A007686_01 | At2g40900 | putative integral membrane protein nodulin; protein id: At2g40900.1           | NA     | NA     | NA     | NA     |
| A007696_01 | At2g39400 | putative phospholipase; protein id: At2g39400.1                               | -3.935 | NA     | -1.902 | NA     |
| A007697_01 | At2g19160 | unknown protein; protein id: At2g19160.1                                      | 0.191  | 0.105  | -0.3   | 0.073  |
| A007702_01 | At2g20020 | expressed protein; protein id: At2g20020.1                                    | 0.486  | 0.332  | 0.19   | 0.067  |
| A007704_01 | At2g39570 | expressed protein; protein id: At2g39570.1                                    | -0.789 | -1.036 | -1.082 | -1.136 |
| A007709_01 | At2g20000 | CDC27/NUC2-like protein; protein id: At2g20000.1                              | 0.187  | 0.125  | 0.069  | 0.514  |
| A007714_01 | At2g44920 | thylakoid lumen pentapeptide repeat family protein; protein id: At2g44920.1   | -0.07  | 0.042  | -0.346 | -0.756 |
| A007716_01 | At2g44850 | unknown protein; protein id: At2g44850.1                                      | -0.633 | -0.399 | NA     | 0.161  |
| A007723_01 | At2g48120 | pale cress protein; protein id: At2g48120.1                                   | 0.945  | 0.817  | 0.729  | 0.849  |
| A007725_01 | At2g45520 | expressed protein; protein id: At2g45520.1                                    | 0.177  | 0.121  | 0.331  | 0.108  |
| A007727_01 | At2g31950 | molybdopterin synthase (CNX2); protein id: At2g31950.1                        | -0.825 | NA     | -1.247 | -0.945 |
| A007730_01 | At2g44310 | expressed protein; protein id: At2g44310.1                                    | 0.325  | 0.357  | 0.527  | 0.322  |
| A007733_01 | At2g31410 | expressed protein; protein id: At2g31410.1                                    | 0.472  | 0.49   | 0.455  | 0.347  |
| A007736_01 | At2g48100 | expressed protein; protein id: At2g48100.1                                    | -0.146 | -0.072 | -0.118 | -0.193 |
| A007739_01 | At2g17120 | expressed protein; protein id: At2g17120.1                                    | 0.23   | NA     | 0.205  | 0.282  |
| A007744_01 | At2g27810 | putative membrane transporter; protein id: At2g27810.1                        | 0.906  | 0.616  | 0.499  | 0.676  |
| A007746_01 | At2g40890 | cytochrome p450, putative; protein id: At2g40890.1                            | -1.595 | -1.826 | -0.915 | -1.628 |
| A007749_01 | At2g30100 | putative unknown protein, leucine-rich repeat; protein id: At2g30100.1        | -0.262 | NA     | 0.006  | 0.45   |
| A007750_01 | At2g33480 | putative NAM (no apical meristem)-like protein; protein id: At2g33480.1       | -2.933 | -2.906 | -1.698 | -2.276 |
| A007753_01 | At2g37240 | expressed protein; protein id: At2g37240.1                                    | -0.535 | -0.823 | -0.818 | -1.178 |
| A007756_01 | At2g41250 | hypothetical protein; protein id: At2g41250.1                                 | -1.498 | -1.33  | -0.479 | -0.691 |
| A007757_01 | At2g34050 | expressed protein; protein id: At2g34050.1                                    | 0.456  | 0.984  | 0.67   | 0.857  |
| A007759_01 | At2g39630 | putative dolichyl-phosphate beta-glucosyltransferase; protein id: At2g39630.1 | -0.186 | -0.299 | 0.057  | 0.076  |
| A007762_01 | At2g30720 | hypothetical protein; protein id: At2g30720.1                                 | 0.17   | NA     | NA     | -0.199 |
| A007765_01 | xxxx      | b/t expressed protein; protein id: At2g06200.1 and protein id: At2g06200.2    | 0.049  | 0.108  | NA     | 0.162  |
| A007766_01 | At2g21470 | putative ubiquitin activating enzyme; protein id: At2g21470.1                 | -0.234 | -0.217 | -0.49  | 0.151  |
| A007767_01 | At2g27920 | putative carboxypeptidase; protein id: At2g27920.1                            | 0.013  | 0.448  | -0.271 | -0.231 |
| A007768_01 | At2g42620 | F-box protein ORE9, AtFBL7; protein id: At2g42620.1                           | -0.669 | -0.826 | -0.53  | -0.708 |
| A007770_01 | At2g39660 | putative protein kinase; protein id: At2g39660.1                              | -0.793 | NA     | -1.304 | -1.152 |
| A007776_01 | At2g37230 | unknown protein; protein id: At2g37230.1                                      | 1.111  | 0.8    | 0.436  | 1.333  |
| A007778_01 | At2g30110 | ubiquitin activating enzyme 1 (UBA1); protein id: At2g30110.1                 | 0.048  | 0.114  | 0.237  | 0.301  |
| A007781_01 | At2g21620 | auxin-regulated protein; protein id: At2g21620.2                              | -1.951 | -1.706 | -1.315 | -2.055 |
| A007786_01 | At2g36410 | expressed protein; protein id: At2g36410.1                                    | -1.079 | NA     | NA     | -0.728 |
| A007791_01 | At2g26800 | putative hydroxymethylglutaryl-CoA lyase; protein id: At2g26800.1             | -0.721 | -0.825 | -0.727 | -0.697 |
| A007792_01 | At2g26990 | COP9 complex subunit CSN2, putative; protein id: At2g26990.1                  | 0.256  | 0.106  | 0.142  | 0.609  |
| A007793_01 | At2g22780 | putative glyoxysomal malate dehydrogenase precursor; protein id: At2g22780.1  | 0.127  | 0.155  | 0.101  | 0.2    |
| A007794_01 | At2g01850 | xyloglucan endotransglycosylase (EXGT-A3); protein id: At2g01850.1            | -1.354 | -1.273 | -1.112 | -1.343 |
| A007795_01 | At2g47270 | expressed protein; protein id: At2g47270.1                                    | -1.005 | -0.578 | -0.971 | -1.873 |
| A007797_01 | At2g32150 | putative hydrolase; protein id: At2g32150.1                                   | -2.525 | -2.784 | -1.252 | -1.432 |
| A007798_01 | At2g47180 | putative galactinol synthase; protein id: At2g47180.1                         | -0.263 | NA     | -1.016 | -1.617 |
| A007801_01 | At2g02570 | hypothetical protein; protein id: At2g02570.1                                 | -0.439 | -0.684 | -0.554 | -0.337 |
| A007804_01 | At2g40480 | hypothetical protein; protein id: At2g40480.1                                 | 0.882  | 1.036  | 0.648  | 0.798  |
| A007805_01 | At2g31170 | putative cysteinyl-tRNA synthetase; protein id: At2g31170.1                   | 0.913  | 0.821  | 0.399  | 0.527  |
| A007806_01 | At2g36490 | hypothetical protein; protein id: At2g36490.1                                 | 0      | NA     | NA     | 0.305  |
| A007808_01 | At2g21150 | putative XAP-5 protein (Homo sapiens); protein id: At2g21150.1                | 0.082  | NA     | -0.084 | -0.315 |
| A007809_01 | At2g38670 | putative phospholipid cytidylyltransferase; protein id: At2g38670.1           | 0.531  | 0.636  | 0.182  | 0.282  |
| A007810_01 | At2g38650 | expressed protein; protein id: At2g38650.1                                    | -0.042 | -0.2   | -0.018 | 0.122  |
| A007811_01 | At2g28150 | hypothetical protein; protein id: At2g28150.1                                 | 0.748  | 0.868  | NA     | 0.925  |
| A007812_01 | At2g23840 | unknown protein; protein id: At2g23840.1                                      | -1.371 | -1.955 | -1.635 | -2.534 |
| A007814_01 | At2g01620 | expressed protein; protein id: At2g01620.1                                    | -0.175 | 0.196  | -0.441 | -0.592 |
| A007815_01 | At2g43550 | putative trypsin inhibitor; protein id: At2g43550.1                           | 1.582  | 1.478  | 0.646  | 0.905  |
| A007816_01 | At2g43530 | putative trypsin inhibitor; protein id: At2g43530.1                           | 1.571  | 1.314  | 0.799  | 0.724  |
| A007817_01 | At2g15620 | ferredoxin--nitrite reductase; protein id: At2g15620.1                        | -0.187 | NA     | -0.701 | -0.349 |
| A007820_01 | At2g14560 | unknown protein; protein id: At2g14560.1                                      | -2.858 | NA     | NA     | NA     |
| A007823_01 | At2g47830 | unknown protein; protein id: At2g47830.1                                      | -0.267 | 0.089  | NA     | 0.146  |
| A007827_01 | At2g43710 | stearoyl-ACP desaturase; protein id: At2g43710.1                              | 0.134  | 0.194  | 0.029  | 0.228  |
| A007829_01 | At2g46360 | hypothetical protein; protein id: At2g40440.1                                 | -0.548 | -0.165 | -1.034 | NA     |
| A007830_01 | At2g29970 | expressed protein; protein id: At2g29970.1                                    | -0.744 | -1.261 | -1.001 | -1.181 |
| A007832_01 | At2g03390 | unknown protein; protein id: At2g03390.1                                      | -0.535 | -0.761 | -0.237 | -0.135 |
| A007833_01 | At2g48010 | putative protein kinase; protein id: At2g48010.1                              | -0.746 | NA     | NA     | NA     |

|            |           |                                                          |        |        |        |        |  |
|------------|-----------|----------------------------------------------------------|--------|--------|--------|--------|--|
| A007834_01 | At2g40770 | putative SNF2/SWI2 family transcription factor; prot     | -0.329 | NA     | NA     | NA     |  |
| A007835_01 | At2g04410 | unknown protein; protein id: At2g04410.1                 | -0.841 | -0.632 | -0.225 | -0.8   |  |
| A007836_01 | At2g36270 | ABA-responsive element binding protein, putative; p      | 0.16   | -0.176 | NA     | 0.216  |  |
| A007840_01 | At2g38550 | putative non-green plastid inner envelope membran        | 0.584  | 0.342  | 0.455  | 0.316  |  |
| A007844_01 | At2g36320 | expressed protein; protein id: At2g36320.1               | -1.848 | -1.822 | -1.234 | -2.036 |  |
| A007846_01 | At2g26350 | putative peroxisome assembly protein PER8; protei        | -0.819 | -0.437 | NA     | -0.18  |  |
| A007848_01 | At2g37110 | expressed protein; protein id: At2g37110.1               | -0.348 | -0.17  | 0.112  | 0.163  |  |
| A007850_01 | At2g11520 | putative protein kinase; protein id: At2g11520.1         | -0.528 | NA     | NA     | -0.327 |  |
| A007852_01 | At2g36340 | hypothetical protein; protein id: At2g36340.1            | -0.101 | -0.32  | NA     | 0.072  |  |
| A007859_01 | At2g45040 | putative metalloproteinase; protein id: At2g45040.1      | -2.423 | NA     | NA     | NA     |  |
| A007860_01 | At2g03310 | hypothetical protein; protein id: At2g03310.1            | -2.241 | -2.305 | -1.73  | -3.621 |  |
| A007862_01 | At2g43650 | unknown protein; protein id: At2g43650.1                 | 0.796  | 0.359  | 0.448  | 0.709  |  |
| A007865_01 | At2g41960 | unknown protein; protein id: At2g41960.1                 | -0.328 | -0.177 | -0.101 | -0.115 |  |
| A007868_01 | At2g21230 | bZIP family transcription factor; protein id: At2g21230  | -0.095 | -0.377 | -0.042 | 0.279  |  |
| A007870_01 | At2g46230 | expressed protein; protein id: At2g46230.1               | 0.359  | 0.277  | 0.385  | 0.62   |  |
| A007871_01 | At2g44620 | acyl carrier protein; protein id: At2g44620.1            | 0.415  | 0.29   | 0.293  | 0.21   |  |
| A007873_01 | At2g34040 | expressed protein; protein id: At2g34040.1               | 0.482  | 0.435  | 0.24   | 0.322  |  |
| A007875_01 | At2g33470 | expressed protein; protein id: At2g33470.1               | -0.047 | -0.262 | 0.052  | -0.073 |  |
| A007876_01 | At2g40270 | putative protein kinase; protein id: At2g40270.1         | -1.003 | -1.036 | -0.643 | -0.668 |  |
| A007877_01 | At2g30390 | putative ferrochelatase precursor; protein id: At2g30390 | -0.125 | 0.002  | -0.138 | -0.285 |  |
| A007878_01 | At2g33410 | heterogeneous nuclear ribonucleoprotein(hnRNP), p        | -0.111 | 0.174  | 0.043  | -0.01  |  |
| A007880_01 | At2g33390 | unknown protein; protein id: At2g33390.1                 | -0.625 | -0.827 | -0.463 | -0.4   |  |
| A007883_01 | At2g33240 | putative myosin heavy chain; protein id: At2g33240.1     | 0.347  | 0.665  | 0.4    | 0.152  |  |
| A007885_01 | At2g17440 | unknown protein; protein id: At2g17440.1                 | -0.597 | -0.581 | NA     | 0.074  |  |
| A007886_01 | At2g25660 | unknown protein; protein id: At2g25660.1                 | -0.579 | NA     | -0.372 | -0.103 |  |
| A007891_01 | At2g30490 | cinnamate-4-hydroxylase; protein id: At2g30490.1         | -0.884 | -1.172 | -0.313 | -0.393 |  |
| A007892_01 | At2g38760 | putative annexin; protein id: At2g38760.1                | 0.471  | NA     | -0.251 | -0.34  |  |
| A007893_01 | At2g36850 | callose synthase (1,3-beta-glucan synthase) family;      | -0.604 | NA     | -0.395 | -0.595 |  |
| A007894_01 | At2g17800 | Rac-like GTP-binding protein (ARAC1); protein id: A      | 0.533  | 0.63   | 0.521  | 1.131  |  |
| A007896_01 | At2g34590 | putative pyruvate dehydrogenase E1 beta subunit; p       | 0.431  | 0.501  | -0.197 | -0.248 |  |
| A007897_01 | At2g16790 | putative gluconokinase; protein id: At2g16790.1          | -1.815 | NA     | NA     | NA     |  |
| A007898_01 | At2g36880 | putative s-adenosylmethionine synthetase; protein i      | -0.352 | -0.314 | 0.1    | 0.275  |  |
| A007899_01 | At2g25560 | putative DnaJ protein; protein id: At2g25560.1           | -0.347 | NA     | NA     | 0.223  |  |
| A007901_01 | At2g27860 | putative dTDP-glucose 4-6-dehydratase; protein id:       | 0.167  | 0.519  | 0.307  | 0.178  |  |
| A007902_01 | At2g32260 | putative phospholipid cytidyltransferase; protein id:    | -0.48  | -0.508 | -0.148 | -0.026 |  |
| A007903_01 | At2g44050 | 6,7-dimethyl-8-ribityllumazine synthase precursor; p     | 0.842  | 0.662  | 0.439  | 0.572  |  |
| A007905_01 | At2g06050 | 12-oxophytodienoate reductase (OPR3)(DDE1); pro          | 0.789  | 0.752  | -0.086 | 0.295  |  |
| A007906_01 | At2g01110 | TATC-like protein; protein id: At2g01110.1               | -0.624 | -0.42  | -0.432 | -0.717 |  |
| A007923_01 | At2g24500 | putative C2H2-type zinc finger protein; protein id: At   | 0.23   | 0.17   | 0.321  | 0.322  |  |
| A007924_01 | At2g19640 | putative SET-domain transcriptional regulator; prote     |        | 0.347  | NA     | 0.581  |  |
| A007925_01 | At2g46250 | hypothetical protein; protein id: At2g46250.1            | -0.1   | -0.368 | NA     | -0.024 |  |
| A007926_01 | At2g42720 | hypothetical protein; protein id: At2g42720.1            | -0.737 | 0.405  | -0.21  | -0.213 |  |
| A007929_01 | At2g44770 | expressed protein; protein id: At2g44770.1               | 0.876  | 1.08   | 0.878  | 1.216  |  |
| A007930_01 | At2g39990 | 26S proteasome regulatory subunit; protein id: At2g      | 0.441  | 0.39   | 0.69   | 0.993  |  |
| A007931_01 | At2g26960 | myb family transcription factor; protein id: At2g26960   | 0.345  | 0.567  | 0.618  | 1.021  |  |
| A007932_01 | At2g13950 | CHP-rich zinc finger protein, putative; protein id: At2  | NA     | NA     | NA     | -0.554 |  |
| A007934_01 | At2g40540 | putative potassium transporter; protein id: At2g40540    | 0.542  | 0.456  | 0.381  | 0.736  |  |
| A007939_01 | At2g38770 | unknown protein; protein id: At2g38770.1                 | 0.589  | 0.361  | 0.374  | 0.303  |  |
| A007941_01 | At2g17380 | clathrin assembly protein AP19, small subunit; prote     | -0.118 | -0.007 | 0.054  | -0.159 |  |
| A007942_01 | At2g01570 | RGA; protein id: At2g01570.1                             | -0.462 | -0.324 | -0.27  | -0.273 |  |
| A007945_01 | At2g33610 | putative SWI/SNF complex subunit SW13; protein id:       | 0.132  | -0.126 | NA     | 0.429  |  |
| A007947_01 | At2g15570 | putative thioredoxin M; protein id: At2g15570.1          | -0.341 | -0.008 | 0.239  | -0.099 |  |
| A007949_01 | At2g24090 | putative chloroplast ribosomal protein L35; protein id:  | 0.943  | 0.913  | 0.679  | 0.87   |  |
| A007950_01 | At2g46020 | putative SNF2 subfamily transcriptional activator; pr    | -0.309 | -0.447 | -0.011 | 0.09   |  |
| A007951_01 | At2g21130 | cyclophilin (CYP2); protein id: At2g21130.1              | 0.144  | 0.039  | 0.487  | 0.535  |  |
| A007952_01 | At2g15580 | putative RING-H2 zinc finger protein; protein id: At2    | -0.692 | -0.617 | -0.335 | -0.65  |  |
| A007953_01 | At2g22310 | ubiquitin-specific protease 4 (UBP4); protein id: At2    | -0.393 | -0.003 | NA     | 0.518  |  |
| A007954_01 | At2g33860 | auxin response transcription factor 3 (ETTIN/ARF3)       | 0.294  | 0.716  | NA     | 0.377  |  |
| A007955_01 | At2g24100 | expressed protein; protein id: At2g24100.1               | -0.869 | -0.921 | 0.165  | 0.336  |  |
| A007959_01 | At2g45980 | expressed protein; protein id: At2g45980.1               | -0.973 | -1.027 | -0.895 | -1.294 |  |
| A007961_01 | At2g41630 | transcription factor IIB (TFIIB); protein id: At2g41630  | 0.437  | 0.35   | 0.307  | 0.558  |  |
| A007964_01 | At2g06850 | xyloglucan endotransglycosylase (ext/EXGT-A1); pr        | 1.215  | 1.05   | 0.571  | 0.901  |  |
| A007966_01 | At2g31800 | putative protein kinase; protein id: At2g31800.1         | -1.303 | -1.588 | -1.347 | -1.454 |  |
| A007967_01 | At2g16500 | arginine decarboxylase; protein id: At2g16500.1          | -0.19  | -0.499 | -0.205 | -0.026 |  |
| A007969_01 | At2g39270 | similar to putative adenylate kinase; protein id: At2g   | -0.926 | -0.637 | -0.147 | -0.26  |  |
| A007971_01 | At2g05320 | putative N-acetylglucosaminyltransferase; protein id     | -0.535 | NA     | NA     | NA     |  |
| A007973_01 | At2g37650 | putative scarecrow gene regulator; protein id: At2g3     | -1.129 | NA     | NA     | NA     |  |
| A007974_01 | At2g15050 | putative lipid transfer protein; protein id: At2g15050.  | -1.696 | -1.546 | -0.859 | NA     |  |

|            |           |                                                           |           |           |        |        |
|------------|-----------|-----------------------------------------------------------|-----------|-----------|--------|--------|
| A007975_01 | At2g22420 | putative peroxidase; protein id: At2g22420.1              | 0.411     | 0.502     | 0.798  | 1.221  |
| A007977_01 | At2g18050 | histone H1; protein id: At2g18050.1                       | -3.37     | -3.306    | -1.817 | -2.775 |
| A007981_01 | At2g40100 | light-harvesting chlorophyll a/b binding protein; prote   | 0.256     | 0.573     | 0.146  | -0.035 |
| A007982_01 | At2g21520 | putative phosphatidylinositol/phosphatidylcholine tra     | 0.186     | 0.057     | 0.048  | 0.551  |
| A007983_01 | At2g04360 | hypothetical protein; protein id: At2g04360.1             | 0.318     | 0.408 NA  |        | 0.23   |
| A007988_01 | At2g04520 | putative translation initiation factor eIF-1A; protein ic | 0.053     | -0.219    | 0.086  | -0.08  |
| A007989_01 | At2g28320 | unknown protein; protein id: At2g28320.1                  | -0.537 NA | NA        |        | -0.442 |
| A007993_01 | At2g31810 | putative acetolactate synthase; protein id: At2g3181      | -0.984    | -1.063    | -1.098 | -1.088 |
| A007994_01 | At2g25910 | expressed protein; protein id: At2g25910.1                | -0.202    | -0.039    | -0.106 | -0.383 |
| A007998_01 | At2g03690 | expressed protein; protein id: At2g03690.1                | 0.148     | 0.088     | 0.484  | 0.467  |
| A008004_01 | At2g26570 | unknown protein; protein id: At2g26570.1                  | -0.635    | -0.611 NA |        | -0.741 |
| A008005_01 | At2g27840 | unknown protein; protein id: At2g27840.1                  | 0.677     | 0.93      | 0.968  | 0.96   |
| A008007_01 | At2g14170 | putative methylmalonate semi-aldehyde dehydrogenase       | -0.501    | -0.473    | -0.719 | -0.728 |
| A008009_01 | At2g30980 | putative shaggy-like protein kinase dzeta; protein id     | 0.558     | 0.655     | 0.706  | 0.824  |
| A008010_01 | At2g29020 | expressed protein; protein id: At2g29020.1                | -0.036    | -0.075    | 0.128  | 0.23   |
| A008012_01 | At2g27800 | hypothetical protein; protein id: At2g27800.1             | 0.133     | 0.094     | -0.218 | -0.072 |
| A008014_01 | At2g20400 | unknown protein; protein id: At2g20400.1                  | -0.352    | 0.046     | -0.255 | -0.374 |
| A008017_01 | At2g33800 | 30S ribosomal protein S5; protein id: At2g33800.1         | 0.895     | 0.711     | 0.242  | 0.478  |
| A008018_01 | At2g17130 | putative NAD+ dependent isocitrate dehydrogenase          | -0.004    | 0.378 NA  |        | 0.323  |
| A008026_01 | At2g19540 | putative WD-40 repeat protein; protein id: At2g1954       | 0.04      | 0.127     | 0.254  | 0.898  |
| A008027_01 | At2g17420 | putative thioredoxin reductase; protein id: At2g1742      | 0.495     | 0.376     | 0.316  | 0.293  |
| A008033_01 | At2g40765 | unknown protein; protein id: At2g40765.1                  | 0.262     | 0.459     | 0.611  | -0.148 |
| A008035_01 | At2g35360 | hypothetical protein; protein id: At2g35360.1             | -0.03     | -0.099    | 0.133  | 0.075  |
| A008036_01 | At2g03150 | putative calmodulin; protein id: At2g03150.1              | 0.242     | -0.091    | 0.152  | 0.208  |
| A008038_01 | At2g33040 | mitochondrial F1-ATPase, gamma subunit (ATP3_γ)           | 0.428     | 0.581     | 0.352  | 0.438  |
| A008039_01 | At2g30570 | photosystem II reaction center 6.1KD protein; protei      | -0.629    | -0.54     | -0.475 | -1.05  |
| A008042_01 | At2g03730 | putative uridylyl transferase; protein id: At2g03730.1    | -1.411    | -1.422    | -1.307 | -1.298 |
| A008043_01 | At2g36020 | expressed protein; protein id: At2g36020.1                | -0.724    | -0.244 NA | NA     |        |
| A008044_01 | At2g02470 | putative PHD-type zinc finger protein; protein id: At2    | 0.003 NA  | NA        |        | 0.058  |
| A008047_01 | At2g26300 | G protein alpha subunit 1 (GPA1); protein id: At2g26      | -0.212 NA |           | -0.188 | -0.047 |
| A008049_01 | At2g40360 | putative WD-40 repeat protein; protein id: At2g4036       | 0.242 NA  |           | 0.19   | 0.638  |
| A008052_01 | At2g34680 | unknown protein; protein id: At2g34680.1                  | 0.55      | 0.768     | 0.709  | 1.124  |
| A008053_01 | At2g04700 | putative ferredoxin-thioredoxin reductase; protein id     | -0.122    | 0.171     | -0.352 | -0.862 |
| A008055_01 | At2g02320 | hypothetical protein; protein id: At2g02320.1             | 1.188     | 1.433     | 1.28   | 1.412  |
| A008056_01 | At2g38540 | putative nonspecific lipid-transfer protein; protein id:  | 0.902     | 0.25      | 1.302  | 1.712  |
| A008060_01 | At2g05210 | hypothetical protein; protein id: At2g05210.1             | 0.793     | 0.818     | 0.656  | 0.746  |
| A008068_01 | At2g31130 | expressed protein; protein id: At2g31130.1                | -1.182    | -1.171 NA |        | -0.732 |
| A008070_01 | At2g31740 | hypothetical protein; protein id: At2g31740.1             | 0.481 NA  | NA        |        | 0.826  |
| A008074_01 | At2g29210 | putative proline-rich protein; protein id: At2g29210.1    | 0.035     | -0.044 NA |        | -0.353 |
| A008081_01 | At2g33340 | putative PRP19-like spliceosomal protein; protein id      | 0.144     | -0.12     | 0.176  | 0.411  |
| A008083_01 | At2g31040 | expressed protein; protein id: At2g31040.1                | 0.184 NA  |           | -0.586 | -0.974 |
| A008087_01 | At2g45070 | putative transport protein SEC61 beta-subunit; prote      | -0.075    | 0.423     | 0.407  | 0.381  |
| A008088_01 | At2g02090 | helicase, putative; protein id: At2g02090.1               | -0.027    | -0.229    | -0.052 | 0.631  |
| A008089_01 | At2g27510 | putative ferredoxin; protein id: At2g27510.1              | 0.352     | 0.329     | 0.772  | 1.109  |
| A008090_01 | At2g27490 | unknown protein; protein id: At2g27490.1                  | -0.191 NA |           | -0.483 | -0.518 |
| A008092_01 | At2g11890 | expressed protein; protein id: At2g11890.1                | 0.116     | 0.303     | 0.333  | 0.015  |
| A008094_01 | At2g47810 | putative CCAAT-box binding transcription factor; prot     | 0.186     | 0.888 NA  |        | 0.219  |
| A008107_01 | At2g17240 | expressed protein; protein id: At2g17240.1                | 0.412     | 0.622     | 0.209  | -0.202 |
| A008119_01 | At2g23950 | putative LRR receptor protein kinase; protein id: At2     | -0.137    | 0.04 NA   |        | 1.15   |
| A008122_01 | At2g26890 | unknown protein; protein id: At2g26890.1                  | -0.45     | -0.04     | -0.284 | 0.562  |
| A008127_01 | At2g26780 | unknown protein; protein id: At2g26780.1                  | -0.286    | -0.212    | 0.156  | 0.189  |
| A008130_01 | At2g16900 | expressed protein; protein id: At2g16900.1                | 0.407     | 0.119 NA  |        | 0.526  |
| A008131_01 | At2g03980 | putative GDSL-motif lipase/hydrolase; protein id: At      | 0.796     | 0.653     | 0.793  | 1.62   |
| A008132_01 | At2g29400 | phosphoprotein phosphatase-type 1 catalytic subun         | -0.333    | -0.447    | -0.266 | -0.23  |
| A008133_01 | At2g27600 | putative ATPase; protein id: At2g27600.1                  | 0.013     | -0.369    | -0.027 | 0.113  |
| A008135_01 | At2g16860 | expressed protein; protein id: At2g16860.1                | -0.267    | -0.281    | -0.218 | -0.091 |
| A008136_01 | At2g39840 | phosphoprotein phosphatase type 1 catalytic subun         | -0.388 NA |           | -0.197 | -0.184 |
| A008137_01 | At2g45560 | putative cytochrome P450; protein id: At2g45560.1         | -0.363 NA | NA        | NA     |        |
| A008139_01 | At2g15790 | expressed protein; protein id: At2g15790.1                | 0.03      | -0.194    | -0.238 | -0.09  |
| A008143_01 | At2g27590 | expressed protein; protein id: At2g27590.1                | 0.542     | 0.565     | 0.705  | 1.147  |
| A008148_01 | At2g35390 | phosphoribosyl pyrophosphate synthetase; protein i        | -0.33     | -0.307    | -0.381 | -0.128 |
| A008153_01 | At2g26000 | hypothetical protein; protein id: At2g26000.1             | -0.648 NA | NA        | NA     |        |
| A008161_01 | At2g20230 | expressed protein; protein id: At2g20230.1                | -1.083    | -0.815    | -0.488 | -0.818 |
| A008164_01 | At2g18790 | phytochrome B; protein id: At2g18790.1                    | 0.269     | 0.187 NA  |        | 0.314  |
| A008165_01 | At2g17290 | putative calmodulin-domain protein kinase CPK6; p         | -1.119    | -0.881 NA |        | -0.21  |
| A008166_01 | At2g31370 | bZIP transcription factor (POSF21); protein id: At2g      | -0.379    | 0.008     | 0.038  | 0.737  |
| A008170_01 | At2g39250 | apetala2 family protein (RAP2); protein id: At2g392       | 0.073 NA  | NA        |        | -0.619 |
| A008172_01 | At2g01070 | unknown protein; protein id: At2g01070.1                  | 0.632     | 0.572     | 0.275  | 0.003  |

|            |           |                                                                              |        |        |    |        |        |
|------------|-----------|------------------------------------------------------------------------------|--------|--------|----|--------|--------|
| A008173_01 | At2g39260 | unknown protein; protein id: At2g39260.1                                     | -0.398 | -0.281 | NA |        | -0.263 |
| A008179_01 | At2g21290 | expressed protein; protein id: At2g21290.1                                   | 0.05   | 0.463  |    | 0.234  | -0.612 |
| A008182_01 | At2g25930 | unknown protein; protein id: At2g25930.1                                     | -0.536 | NA     | NA |        |        |
| A008183_01 | At2g26030 | F-box protein; protein id: At2g26030.1                                       | -0.99  | -0.961 |    | -0.306 | -0.683 |
| A008184_01 | At2g21340 | expressed protein; protein id: At2g21340.1                                   | 0.25   | 0.077  |    | -0.228 | 0.037  |
| A008191_01 | At2g22860 | unknown protein; protein id: At2g22860.1                                     | -0.967 | -0.579 | NA |        | -0.562 |
| A008198_01 | At2g26900 | putative Na <sup>+</sup> dependent ileal bile acid transporter; p            | 0.902  | 0.946  |    | 0.51   | 0.839  |
| A008201_01 | At2g34585 | expressed protein; protein id: At2g34585.1                                   | -0.033 | 0.28   |    | 0.24   | -0.383 |
| A008202_01 | At2g21530 | unknown protein; protein id: At2g21530.1                                     | 0.069  | 0.177  |    | -0.049 | -0.506 |
| A008212_01 | At2g23930 | putative small nuclear ribonucleoprotein E; protein i                        | 0.548  | 0.973  |    | 0.867  | 1.032  |
| A008213_01 | At2g23940 | expressed protein; protein id: At2g23940.1                                   | 0.385  | 0.436  |    | 0.351  | 0.259  |
| A008214_01 | At2g07000 | unknown protein; protein id: At2g07000.1                                     | -1.753 | NA     | NA |        | NA     |
| A008215_01 | At2g07040 | leucine-rich repeat transmembrane protein kinase, p                          | -0.243 | -0.411 | NA |        | NA     |
| A008218_01 | At2g47640 | putative small nuclear ribonucleoprotein D2; protein                         | 0.201  | 0.333  |    | 0.315  | -0.165 |
| A008221_01 | At2g47760 | Not56-like protein; protein id: At2g47760.1                                  | 0.308  | NA     |    | 0.188  | 0.402  |
| A008245_01 | At2g35410 | chloroplast RNA-binding protein cp33, putative; prot                         | -0.041 | 0.55   |    | 0.011  | -0.338 |
| A008247_01 | At2g35510 | expressed protein; protein id: At2g35510.1                                   | -0.255 | -0.377 |    | -0.471 | -0.33  |
| A008251_01 | At2g25860 | hypothetical protein; protein id: At2g25860.1                                | -0.396 | 0.591  |    | -0.376 | -0.227 |
| A008252_01 | At2g34790 | FAD-linked oxidoreductase family; protein id: At2g3 NA                       |        | NA     | NA |        | NA     |
| A008254_01 | At2g34810 | FAD-linked oxidoreductase family; protein id: At2g3                          | 1.16   | 1.316  |    | 0.64   | 0.952  |
| A008260_01 | At2g46000 | expressed protein; protein id: At2g46000.1                                   | 0.419  | 0.301  | NA |        | NA     |
| A008262_01 | At2g46100 | unknown protein; protein id: At2g46100.1                                     | -1.132 | -1.167 |    | -0.796 | -1.546 |
| A008268_01 | At2g46200 | hypothetical protein; protein id: At2g46200.1                                | -0.187 | -0.275 |    | -0.061 | -0.074 |
| A008270_01 | At2g46210 | putative fatty acid desaturase/cytochrome b5 fusion                          | -0.398 | -0.328 |    | -0.686 | -1.345 |
| A008271_01 | At2g40980 | unknown protein; protein id: At2g40980.1                                     | 0.04   | 0.258  |    | 0.124  | 0.702  |
| A008272_01 | At2g40990 | unknown protein; protein id: At2g40990.1                                     | -0.666 | NA     | NA |        | NA     |
| A008277_01 | At2g20190 | unknown protein; protein id: At2g20190.1                                     | -0.263 | -0.132 |    | -0.16  | -0.166 |
| A008280_01 | At2g02120 | plant defensin protein, putative (PDF2.1); protein id:                       | -0.163 | -0.268 |    | -0.847 | -0.569 |
| A008281_01 | At2g42690 | putative lipase; protein id: At2g42690.1                                     | -0.726 | -0.614 |    | -0.347 | 0.045  |
| A008283_01 | At2g29650 | putative Na <sup>+</sup> -dependent inorganic phosphate cotrar               | -0.762 | -0.476 |    | -0.5   | -0.571 |
| A008289_01 | At2g41710 | putative AP2 domain transcription factor; protein id:                        | -0.146 | -0.006 |    | -0.058 | -0.219 |
| A008290_01 | At2g42780 | expressed protein; protein id: At2g42780.1                                   | -0.126 | -0.022 | NA |        | 0.118  |
| A008291_01 | At2g38630 | unknown protein; protein id: At2g38630.1                                     | -0.132 | 0.111  | NA |        | -0.033 |
| A008292_01 | At2g01100 | expressed protein; protein id: At2g01100.1                                   | -0.21  | -0.352 |    | 0.241  | 0.066  |
| A008300_01 | At2g10950 | expressed protein; protein id: At2g10950.1                                   | -0.516 | -0.516 |    | -0.118 | 0.134  |
| A008301_01 | At2g42900 | unknown protein; protein id: At2g42900.1                                     | -0.303 | 0.144  |    | -0.029 | 0      |
| A008302_01 | At2g41230 | unknown protein; protein id: At2g41230.1                                     | 0.067  | 0.188  |    | 0.123  | 0.305  |
| A008303_01 | At2g05260 | expressed protein; protein id: At2g05260.1                                   | -0.455 | -0.402 |    | 0.01   | -0.43  |
| A008305_01 | At2g42840 | En/Spm-like transposon protein; protein id: At2g428                          | 1.775  | 1.367  |    | 1.719  | 2.469  |
| A008308_01 | At2g39080 | unknown protein; protein id: At2g39080.1                                     | 0.578  | 0.502  |    | 0.266  | 0.586  |
| A008310_01 | At2g07180 | putative protein kinase; protein id: At2g07180.1                             | 0.137  | -0.021 | NA |        | -0.06  |
| A008312_01 | At2g18730 | putative diacylglycerol kinase; protein id: At2g18730                        | -0.202 | -0.316 |    | -0.316 | -0.082 |
| A008313_01 | At2g29450 | glutathione transferase (103-1A); protein id: At2g29                         | 0.108  | 0.308  |    | 0.273  | 0.084  |
| A008314_01 | At2g42770 | expressed protein; protein id: At2g42770.1                                   | 0.068  | 0.145  |    | 0.175  | 0.063  |
| A008315_01 | At2g18770 | putative signal recognition particle receptor beta sub                       | 0.152  | 0.337  |    | 0.219  | 0.519  |
| A008321_01 | At2g47850 | unknown protein; protein id: At2g47850.1                                     | 0.046  | 0.336  | NA |        | 0.383  |
| A008325_01 | At2g39070 | unknown protein; protein id: At2g39070.1                                     | 0.304  | 0.337  |    | 0.292  | 0.55   |
| A008326_01 | At2g39980 | putative anthocyanin 5-aromatic acyltransferase; pr                          | -0.081 | -0.083 |    | -0.164 | -0.124 |
| A008327_01 | At2g43290 | putative calcium binding protein; protein id: At2g432                        | 0.132  | 0.256  |    | -0.057 | -0.032 |
| A008329_01 | At2g16800 | expressed protein; protein id: At2g16800.1                                   | 0.295  | 0.166  |    | 0.201  | 0.38   |
| A008330_01 | At2g24550 | expressed protein; protein id: At2g24550.1                                   | -1.251 | NA     |    | -1.472 | -2.803 |
| A008335_01 | At2g34560 | katanin like protein                                                         | 0.762  | 0.925  |    | 0.485  | 0.766  |
| A008336_01 | At2g37490 | unknown protein; protein id: At2g37490.1                                     | -0.584 | -0.251 |    | -0.433 | -0.4   |
| A008338_01 | At2g27690 | cytochrome p450, putative; protein id: At2g27690.1                           | 0.283  | 0.345  |    | 0.232  | 0.425  |
| A008339_01 | At2g20820 | auxin-regulated protein; protein id: At2g20820.2                             | 0.075  | 0.282  |    | 0.107  | 0.02   |
| A008342_01 | At2g47600 | putative Na <sup>+</sup> /Ca <sup>2+</sup> antiporter; protein id: At2g47600 | 0.009  | 0.035  |    | -0.5   | -0.588 |
| A008350_01 | At2g04730 | hypothetical protein; protein id: At2g04730.1                                | 0.865  | 0.986  |    | 0.658  | 0.992  |
| A008351_01 | At2g37310 | hypothetical protein; protein id: At2g37310.1                                | 0.417  | 0.525  |    | 0.193  | 0.148  |
| A008356_01 | At2g38140 | 30S ribosomal protein S31; protein id: At2g38140.1                           | 0.679  | 0.611  |    | 0.335  | -0.127 |
| A008358_01 | At2g04790 | hypothetical protein; protein id: At2g04790.1                                | -0.395 | NA     | NA |        | -0.814 |
| A008368_01 | At2g39750 | expressed protein; protein id: At2g39750.1                                   | -0.129 | 0.089  | NA |        | 0.484  |
| A008372_01 | At2g31280 | hypothetical protein; protein id: At2g31280.1                                | -0.424 | NA     | NA |        | -1.018 |
| A008377_01 | At2g35920 | putative ATP-dependent RNA helicase A; protein id                            | 0.076  | 0.071  |    | -0.17  | 0.17   |
| A008379_01 | At2g25970 | KH domain protein; protein id: At2g25970.1                                   | -0.362 | NA     | NA |        | 0.014  |
| A008381_01 | At2g17340 | expressed protein; protein id: At2g17340.1                                   | 0.251  | NA     | NA |        | NA     |
| A008382_01 | At2g40190 | unknown protein; protein id: At2g40190.1                                     | 0.438  | 0.562  |    | 0.279  | 0.517  |
| A008386_01 | At2g05920 | subtilisin-like serine protease, putative; protein id: A                     | 0.531  | 0.448  |    | 0.436  | 0.983  |
| A008390_01 | At2g04350 | putative acyl-CoA synthetase; protein id: At2g04350                          | -0.495 | -0.541 |    | -0.628 | -0.38  |

|            |           |                                                                    |        |    |        |        |        |
|------------|-----------|--------------------------------------------------------------------|--------|----|--------|--------|--------|
| A008391_01 | At2g05910 | unknown protein; protein id: At2g05910.1                           | -2.537 | NA | NA     | NA     |        |
| A008394_01 | At2g21330 | putative fructose bisphosphate aldolase; protein id:               | -0.705 |    | -0.305 | -0.253 | -0.572 |
| A008397_01 | At2g27680 | expressed protein; protein id: At2g27680.1                         | 0.323  |    | 0.196  | -0.362 | -0.432 |
| A008398_01 | At2g36000 | auxin-regulated protein; protein id: At2g36000.2                   | 0.131  |    | 0.325  | 0.063  | -0.017 |
| A008408_01 | At2g01690 | expressed protein; protein id: At2g01690.1                         | -0.357 | NA |        | -0.255 | -0.376 |
| A008414_01 | At2g20150 | hypothetical protein; protein id: At2g20150.1                      | -0.691 |    | 0.057  | -0.448 | -0.178 |
| A008415_01 | At2g18550 | homeodomain protein; protein id: At2g18550.1                       | -2.839 |    | -3.09  | -0.519 | -1.041 |
| A008423_01 | At2g40370 | laccase (diphenol oxidase), putative; protein id: At2g40370.1      |        | NA | NA     | NA     |        |
| A008432_01 | At2g11910 | expressed protein; protein id: At2g11910.1                         | 0.293  |    | 0.752  | 0.499  | 0.47   |
| A008441_01 | At2g32040 | expressed protein; protein id: At2g32040.1                         | -0.494 | NA |        | -0.217 | -0.226 |
| A008445_01 | At2g43030 | 50S ribosomal protein L3; protein id: At2g43030.1                  | 0.97   |    | 0.762  | 0.485  | 0.742  |
| A008446_01 | At2g15290 | expressed protein; protein id: At2g15290.1                         | 0.625  |    | 0.762  | 0.346  | 0.362  |
| A008448_01 | At2g28290 | putative SNF2 subfamily transcription regulator; pro               | -0.183 |    | -0.545 | 0.118  | 0.894  |
| A008449_01 | At2g27340 | similar to PIG-L; protein id: At2g27340.1                          | 0.439  |    | 0.35   | 0.518  | 0.978  |
| A008452_01 | At2g39390 | 60S ribosomal protein L35; protein id: At2g39390.1                 | 0.894  |    | 1.134  | 1.056  | 0.683  |
| A008453_01 | At2g27350 | expressed protein; protein id: At2g27350.1                         | -0.058 |    | -0.478 | -0.337 | 0.067  |
| A008454_01 | At2g20730 | unknown protein; protein id: At2g20730.1                           | -0.419 |    | -1.172 | -0.744 | -1.535 |
| A008459_01 | At2g45210 | putative auxin-regulated protein; protein id: At2g45210.1          | -3.266 |    | -3.27  | -2.017 | -2.819 |
| A008463_01 | At2g16050 | hypothetical protein; protein id: At2g16050.1                      |        | NA | NA     | NA     | NA     |
| A008472_01 | At2g37040 | phenylalanine ammonia lyase (PAL1); protein id: At2g37040.1        | -0.712 |    | -1.489 | -0.524 | -0.564 |
| A008473_01 | At2g36130 | cyclophilin-like protein; protein id: At2g36130.1                  | 0.075  |    | 0.653  | 0.263  | -0.015 |
| A008475_01 | At2g18230 | putative inorganic pyrophosphatase; protein id: At2g18230.1        | 0.485  |    | 0.43   | 0.648  | 1.016  |
| A008481_01 | At2g21120 | unknown protein; protein id: At2g21120.1                           | -1.181 | NA |        | -0.986 | -0.927 |
| A008483_01 | At2g36720 | putative PHD-type zinc finger protein; protein id: At2g36720.1     | 0.21   |    | 0.031  | -0.026 | 0.052  |
| A008485_01 | At2g28350 | auxin response transcription factor; protein id: At2g28350.1       | -0.278 |    | -0.202 | 0.198  | 0.055  |
| A008486_01 | At2g28380 | expressed protein; protein id: At2g28380.1                         | 0.503  |    | 0.681  | 0.574  | 0.59   |
| A008499_01 | At2g25500 | expressed protein; protein id: At2g25500.1                         | 0.59   |    | 0.982  | 0.237  | 0.295  |
| A008500_01 | At2g35940 | BEL1-like homeobox 1 protein (BLH1); protein id: At2g35940.1       | -2.221 |    | -2.139 | -1.357 | -1.898 |
| A008505_01 | At2g31710 | expressed protein; protein id: At2g31710.1                         | 0.149  | NA | NA     | NA     | NA     |
| A008507_01 | At2g22570 | expressed protein; protein id: At2g22570.1                         | -0.304 |    | -0.364 | -0.13  | -0.547 |
| A008511_01 | At2g24290 | expressed protein; protein id: At2g24290.1                         | 0.445  |    | 0.844  | 0.642  | 0.654  |
| A008512_01 | At5g18380 | putative 40S ribosomal protein S16                                 | 0.324  |    | 0.483  | 0.773  | 0.56   |
| A008514_01 | At2g18160 | bZIP family transcription factor; protein id: At2g18160.1          | -0.401 |    | -0.963 | -0.576 | -0.284 |
| A008518_01 | At2g14890 | arabinogalactan-protein (AGP9); protein id: At2g14890.1            | -1.899 | NA |        | 0.469  | 0.164  |
| A008520_01 | At2g24450 | fasciclin-like arabinogalactan-protein, putative (FLA:)            | -0.485 |    | -0.725 | -0.702 | -1.91  |
| A008531_01 | At2g03810 | hypothetical protein; protein id: At2g03810.1                      | -0.505 | NA |        | -0.768 | -0.416 |
| A008532_01 | At2g33150 | 3-ketoacyl-CoA thiolase; protein id: At2g33150.1                   | -1.046 |    | -1.532 | -0.857 | -0.969 |
| A008533_01 | At2g46540 | expressed protein; protein id: At2g46540.1                         | 0.062  |    | 0.369  | 0.442  | 0.031  |
| A008534_01 | At2g37520 | unknown protein; protein id: At2g37520.1                           | -0.598 |    | -0.748 | -0.632 | -0.974 |
| A008537_01 | At2g03870 | putative snRNP splicing factor; protein id: At2g03870.1            | -0.084 |    | 0.395  | 0.621  | 0.498  |
| A008538_01 | At2g30440 | putative signal peptidase I; protein id: At2g30440.1               | -0.998 | NA |        | -0.544 | -0.583 |
| A008541_01 | At2g40670 | putative two-component response regulator protein;                 | -0.485 | NA | NA     | NA     | NA     |
| A008544_01 | At2g04900 | expressed protein; protein id: At2g04900.1                         | -0.491 |    | -0.199 | 0.14   | -0.338 |
| A008545_01 | At2g02860 | putative sucrose/H <sup>+</sup> symporter; protein id: At2g02860.1 | 0.037  |    | 0.088  | -0.021 | -0.083 |
| A008546_01 | At2g19770 | profilin 4; protein id: At2g19770.1                                | -0.549 |    | -0.337 | -0.55  | -1.587 |
| A008548_01 | At2g39770 | GDP-mannose pyrophosphorylase; protein id: At2g39770.1             | 0.673  |    | 0.741  | 0.557  | 0.69   |
| A008549_01 | At2g05990 | enoyl-ACP reductase (enr-A); protein id: At2g05990.1               | 1.608  |    | 1.201  | 1.001  | 1.599  |
| A008553_01 | At2g39470 | oxygen-evolving complex 25.6 kD protein, chloropla                 | 0.736  |    | 0.708  | -0.195 | -0.255 |
| A008557_01 | At2g04230 | F-box protein; protein id: At2g04230.1                             | -0.479 |    | -0.142 | NA     | 0.281  |
| A008562_01 | At2g02990 | ribonuclease, RNS1; protein id: At2g02990.1                        | -3.173 |    | -3.15  | -1.106 | -1.981 |
| A008564_01 | At2g41430 | ERD15 protein; protein id: At2g41430.1                             | -0.462 |    | -0.854 | -0.392 | -0.613 |
| A008571_01 | At2g41410 | calmodulin-like protein; protein id: At2g41410.1                   | -1.007 |    | -0.627 | -0.09  | -0.639 |
| A008572_01 | At2g42280 | bHLH protein; protein id: At2g42280.1                              |        | NA | NA     | -1.212 | NA     |
| A008573_01 | At2g40300 | putative ferritin; protein id: At2g40300.1                         |        | NA | 0.453  | 0.057  | 0.221  |
| A008575_01 | At2g45260 | hypothetical protein; protein id: At2g45260.1                      | 0.13   |    | 0.22   | 0.266  | 0.355  |
| A008576_01 | At2g46340 | putative photomorphogenesis repressor protein; pro                 | -0.781 | NA |        | -1.195 | -0.973 |
| A008578_01 | At2g38400 | putative beta-alanine-pyruvate aminotransferase; pr                | -0.998 |    | -1.222 | -0.507 | -0.613 |
| A008580_01 | At2g37410 | putative protein translocase; protein id: At2g37410.1              | -0.361 |    | -0.475 | -0.035 | 0.005  |
| A008582_01 | At2g36950 | expressed protein; protein id: At2g36950.1                         | -2.895 |    | -2.796 | -1.734 | -1.881 |
| A008583_01 | At2g17250 | hypothetical protein; protein id: At2g17250.1                      | 0.809  |    | 0.791  | 0.652  | 1.226  |
| A008586_01 | At2g02040 | histidine transport protein (PTR2-B); protein id: At2g02040.1      | -1.159 |    | -1.142 | -0.318 | -0.59  |
| A008587_01 | At2g28000 | putative rubisco subunit binding-protein alpha subur               | 1.779  |    | 1.247  | 0.861  | 1.562  |
| A008588_01 | At2g15270 | expressed protein; protein id: At2g15270.1                         | -0.464 |    | 0.101  | 0.384  | -0.11  |
| A008589_01 | At2g17300 | unknown protein; protein id: At2g17300.1                           | -0.771 | NA | NA     | NA     | NA     |
| A008598_01 | At2g18250 | hypothetical protein; protein id: At2g18250.1                      | -0.482 |    | -0.364 | 0.115  | -0.336 |
| A008599_01 | At2g29080 | putative AAA-type ATPase; protein id: At2g29080.1                  | 0.044  |    | -0.218 | -0.254 | -0.24  |
| A008601_01 | At2g03240 | unknown protein; protein id: At2g03240.1                           | 0.285  |    | 0.279  | 0.509  | 0.915  |
| A008602_01 | At2g15970 | similar to cold acclimation protein WCOR413 (Tritic                | 0.378  |    | 0.388  | 0.357  | 0.113  |

|            |           |                                                          |           |           |        |        |
|------------|-----------|----------------------------------------------------------|-----------|-----------|--------|--------|
| A008603_01 | At2g27170 | putative chromosome associated protein; protein id:      | 0.01      | -0.531    | -0.11  | 0.15   |
| A008604_01 | At2g37340 | unknown protein; protein id: At2g37340.1                 | -0.766    | -0.183    | -0.002 | -0.221 |
| A008605_01 | At2g22990 | putative serine carboxypeptidase I; protein id: At2g2    | -3.075    | -2.656    | -2.594 | -1.949 |
| A008608_01 | At2g47470 | putative protein disulfide-isomerase; protein id: At2g   | 1.36      | 0.876     | 0.921  | 1.365  |
| A008615_01 | At2g30510 | unknown protein; protein id: At2g30510.1                 | -0.132    | -0.232    | -0.556 | -0.189 |
| A008616_01 | At2g33630 | putative steroid dehydrogenase; protein id: At2g336      | -0.309 NA |           | 0.098  | -0.115 |
| A008621_01 | At2g18390 | putative ADP-ribosylation factor; protein id: At2g183    | 0.68      | 0.859     | 0.753  | 0.763  |
| A008622_01 | At2g43780 | hypothetical protein; protein id: At2g43780.1            | 0.223     | 0.755     | 0.643  | 0.482  |
| A008627_01 | At2g44870 | expressed protein; protein id: At2g44870.1               | -0.332    | -0.422    | -0.312 | -0.424 |
| A008631_01 | At2g38360 | unknown protein; protein id: At2g38360.1                 | 0.211 NA  |           | 0.53   | 0.63   |
| A008632_01 | At2g43310 | hypothetical protein; protein id: At2g43310.1            | 0.778     | 0.716     | 0.583  | 0.758  |
| A008637_01 | At2g43400 | putative electron transfer flavoprotein ubiquinone ox    | -0.657    | -0.76     | -0.693 | -0.861 |
| A008638_01 | At2g43420 | putative sterol dehydrogenase; protein id: At2g4342      | 0.12      | -0.18     | 0.035  | 0.087  |
| A008639_01 | At2g13290 | putative N-acetylglucosaminyltransferase; protein id     | 0.122     | -0.582    | -0.433 | -0.354 |
| A008641_01 | At2g45140 | putative VAMP-associated protein; protein id: At2g4      | -0.096    | -0.347    | 0.094  | 0.279  |
| A008644_01 | At2g44520 | putative heme A:farnesyltransferase; protein id: At2     | 0.283     | 0.328     | 0.237  | 0.388  |
| A008645_01 | At2g43460 | 60S ribosomal protein L38; protein id: At2g43460.1       | 1.092     | 0.98      | 1.044  | 0.892  |
| A008648_01 | At2g43540 | expressed protein; protein id: At2g43540.1               | -0.855    | -0.416    | -0.449 | -0.898 |
| A008649_01 | At2g40430 | expressed protein; protein id: At2g40430.1               | 0.771     | 0.181     | 0.372  | 0.72   |
| A008651_01 | At2g40490 | putative uroporphyrinogen decarboxylase; protein id      | 0.614     | 0.516     | -0.181 | 0.08   |
| A008652_01 | At2g46470 | OXA1 protein (OXA1p), putative; protein id: At2g464      | 0.755     | 1.055     | 0.624  | 1.379  |
| A008653_01 | At2g47210 | hypothetical protein; protein id: At2g47210.1            | -0.083    | -0.151    | -0.142 | -0.167 |
| A008654_01 | At2g35260 | expressed protein; protein id: At2g35260.1               | -0.58     | -0.762    | -0.638 | -0.72  |
| A008655_01 | At2g40800 | unknown protein; protein id: At2g40800.1                 | 1.053     | 1.007     | 0.594  | 1.04   |
| A008657_01 | At2g47380 | putative cytochrome c oxidase Vc subunit; protein id     | 0.036     | 0.16      | 0.323  | -0.071 |
| A008658_01 | At2g29630 | putative thiamin biosynthesis protein; protein id: At2   | -0.522    | -0.484    | -0.863 | -0.422 |
| A008660_01 | At2g30250 | WRKY family transcription factor; protein id: At2g30     | -2.112 NA | NA        | NA     |        |
| A008663_01 | At2g41840 | 40S ribosomal protein S2; protein id: At2g41840.1        | 0.511     | 0.567     | 0.647  | 0.883  |
| A008664_01 | At2g45170 | AtAPG8e; putative microtubule-associated protein;        | -1.73     | -2.076    | -1.452 | -1.359 |
| A008667_01 | At2g46030 | E2, ubiquitin-conjugating enzyme 6 (UBC6); protein       | -1.393    | -1.585    | -0.692 | -1.219 |
| A008668_01 | At2g37860 | unknown protein; protein id: At2g37860.1                 | 1.016     | 0.917     | 0.785  | 1.339  |
| A008670_01 | At2g17020 | F-box protein family, AtFBL10; protein id: At2g1702      | 0.008 NA  | NA        |        | -0.464 |
| A008673_01 | At2g30660 | 3-hydroxyisobutyryl-coenzyme A hydrolase; protein        | -1.226    | -1.476    | -0.803 | -1.134 |
| A008676_01 | At2g30710 | expressed protein; protein id: At2g30710.1               | 0.138     | 0.155     | 0.171  | 0.654  |
| A008682_01 | At2g39670 | expressed protein; protein id: At2g39670.1               | 0.807     | 0.864     | 0.657  | 1.11   |
| A008685_01 | At4g34070 | putative protein; protein id: At4g34070.1                | -0.959    | -0.601    | -0.451 | -0.177 |
| A008686_01 | At2g45440 | putative dihydrodipicolinate synthase; protein id: At    | 0.388     | 0.646     | 0.54   | 0.895  |
| A008692_01 | At2g15890 | expressed protein; protein id: At2g15890.1               | -1.495    | -1.334    | -2.329 | -2.762 |
| A008693_01 | At2g25110 | expressed protein; protein id: At2g25110.1               | 0.632     | 0.812     | 0.687  | 0.671  |
| A008699_01 | At2g44900 | F-box protein family, AtFBX5; protein id: At2g44900      | 0.401 NA  | NA        | NA     |        |
| A008703_01 | At2g39970 | 36 kDa-peroxisomal membrane protein (PMP36); pr          | -0.315    | -0.498    | 0.123  | 0.17   |
| A008707_01 | At2g45180 | expressed protein; protein id: At2g45180.1               | -0.502    | -0.328    | -0.698 | -1.811 |
| A008720_01 | At2g47390 | unknown protein; protein id: At2g47390.1                 | 0.284     | 0.257     | 0.011  | 0.056  |
| A008721_01 | At2g13540 | putative cap-binding protein; protein id: At2g13540.     | 0.479     | 0.456     | 0.169  | 0.322  |
| A008722_01 | At2g18700 | putative trehalose-6-phosphate synthase; protein id      | -2.04     | -2.24     | -1.436 | -1.654 |
| A008726_01 | At2g25950 | expressed protein; protein id: At2g25950.1               | 0.297     | 0.619     | 0.273  | 0.434  |
| A008727_01 | At2g41650 | unknown protein; protein id: At2g41650.1                 | 1.216     | 1.077     | 1.254  | 1.118  |
| A008728_01 | At2g02720 | putative pectate lyase; protein id: At2g02720.1          | -0.355    | -0.651 NA |        | -1.349 |
| A008731_01 | At2g28900 | putative membrane channel protein; protein id: At2g      | 1.145     | 0.918     | 0.812  | 0.677  |
| A008733_01 | At2g17450 | putative RING zinc finger protein; protein id: At2g17    | -1.022    | -1.198    | -0.465 | -1.658 |
| A008735_01 | At2g33730 | U5 small nuclear ribonucleoprotein, putative; proteir    | 0.057     | -0.475    | -0.621 | -0.578 |
| A008737_01 | At2g40290 | putative eukaryotic translation initiation factor 2 alph | 0.45      | -0.008    | 0.326  | 0.366  |
| A008739_01 | At2g42230 | hypothetical protein; protein id: At2g42230.1            | -0.168 NA | NA        |        | 0.458  |
| A008742_01 | At2g33380 | RD20 protein; protein id: At2g33380.1                    | -2.119    | -2.458    | -0.759 | -0.178 |
| A008748_01 | At2g41870 | putative DNA binding protein; protein id: At2g41870      | -1.891 NA | NA        | NA     |        |
| A008752_01 | At2g27100 | expressed protein; protein id: At2g27100.1               | -0.147 NA | NA        |        | -0.532 |
| A008753_01 | At2g41950 | hypothetical protein; protein id: At2g41950.1            | 0.837     | 0.716     | 0.668  | 1.021  |
| A008755_01 | At2g23310 | putative integral membrane protein; protein id: At2g NA  | NA        |           | 0.09   | -0.172 |
| A008758_01 | At2g37550 | putative ADP ribosylation factor 1 GTPase activatin;     | 0.348     | 0.567     | 0.219  | 0.58   |
| A008759_01 | At2g42700 | unknown protein; protein id: At2g42700.1                 | 0.195     | 0.102     | -0.018 | 0.456  |
| A008762_01 | At2g42040 | expressed protein; protein id: At2g42040.1               | -0.653    | -0.193    | -0.082 | -0.505 |
| A008763_01 | At2g47320 | putative peptidyl-prolyl cis-trans isomerase; protein    | 0.602     | 0.83      | 0.492  | 0.862  |
| A008764_01 | At2g42070 | expressed protein; protein id: At2g42070.1               | -0.027 NA | NA        |        | 0.044  |
| A008775_01 | At2g32980 | expressed protein; protein id: At2g32980.1               | 0.453     | 0.146     | 0.502  | 0.418  |
| A008776_01 | At2g30580 | putative C3HC4 zinc finger protein; protein id: At2g     | -0.16     | -0.109    | -0.129 | 0.038  |
| A008783_01 | At2g23150 | putative metal ion transporter (NRAMP); protein id: .    | -0.857    | -0.746    | -0.234 | -0.318 |
| A008784_01 | At2g25010 | expressed protein; protein id: At2g25010.1               | -0.303    | 0.014 NA  |        | 0.27   |
| A008790_01 | At2g34720 | putative CCAAT-binding transcription factor subunit      | -0.798    | -0.876    | 0.176  | 0.349  |

|            |           |                                                          |           |           |           |        |
|------------|-----------|----------------------------------------------------------|-----------|-----------|-----------|--------|
| A008793_01 | At2g34730 | putative myosin heavy chain; protein id: At2g34730.      | -0.48     | -0.662    | -0.424    | -0.166 |
| A008794_01 | At2g34750 | unknown protein; protein id: At2g34750.1                 | -0.363    | -0.23     | -0.148    | -0.455 |
| A008795_01 | At2g04690 | unknown protein; protein id: At2g04690.1                 | -1.114    | -1.034    | -0.412    | -0.612 |
| A008798_01 | At2g44530 | putative phosphoribosyl pyrophosphate synthetase;        | 0.206     | 0.1       | 0.198     | 0.335  |
| A008800_01 | At2g43130 | ras-related GTP-binding protein (ARA-4); protein id:     | 0.094     | 0.118     | -0.242    | -0.104 |
| A008801_01 | At2g41120 | hypothetical protein; protein id: At2g41120.1            | -0.651    | 0.013     | -0.448    | -0.086 |
| A008803_01 | At2g22970 | putative serine carboxypeptidase II; protein id: At2g;   | -0.742    | -0.94     | -0.845    | 0.006  |
| A008805_01 | At2g23080 | putative casein kinase II catalytic (alpha) subunit; pi  | -0.194    | -0.266    | 0.044     | 0.472  |
| A008807_01 | At2g46860 | putative inorganic pyrophosphatase; protein id: At2c     | -0.658    | -0.901    | -1.009    | -1.349 |
| A008810_01 | At2g46870 | putative RAV-like B3 domain DNA binding protein; p       | -0.089    | -0.041    | 0.166     | -0.383 |
| A008813_01 | At2g44710 | RRM-containing protein; protein id: At2g44710.1          | -0.354    | -0.039 NA |           | -0.021 |
| A008814_01 | At2g46900 | expressed protein; protein id: At2g46900.1               | -0.359    | -0.412    | -0.421    | -0.458 |
| A008818_01 | At2g41100 | calmodulin-like protein; protein id: At2g41100.1         | -1.581    | -1.906    | -1.566    | -1.709 |
| A008819_01 | At2g47050 | putative pectinesterase; protein id: At2g47050.1         | -0.576    | -0.751    | -0.592    | -1.138 |
| A008821_01 | At2g43141 | snoRNA gene At2g43141                                    | 0.827     | 0.795     | 0.88      | 1.556  |
| A008827_01 | At2g01470 | putative protein transport protein SEC12p; protein ic    | -0.42     | -0.309    | -0.138    | 0.511  |
| A008830_01 | At2g22480 | putative pyrophosphate--fructose-6-phosphate 1-ph        | -0.194    | -0.459    | 0.126     | 0.996  |
| A008835_01 | At2g43760 | putative molybdopterin synthase large subunit; prot      | -0.174    | -0.095    | 0.307     | 0.189  |
| A008838_01 | At2g23780 | putative RING zinc finger protein; protein id: At2g23    | -0.576 NA |           | -0.105    | -0.356 |
| A008840_01 | At2g45620 | expressed protein; protein id: At2g45620.1               | -0.107    | -0.319    | -0.512    | -0.602 |
| A008842_01 | At2g42910 | putative ribose phosphate pyrophosphokinase; prot        | 0.438     | 0.524     | 0.491     | 0.706  |
| A008846_01 | At2g21600 | AtRer1B; protein id: At2g21600.1                         | -0.04 NA  |           | 0.192 NA  |        |
| A008847_01 | At2g40700 | DEAD/DEAH box RNA helicase protein, putative; pr         | 0.116 NA  |           | 0.519     | 1.196  |
| A008855_01 | At2g42740 | 60S ribosomal protein L11B; protein id: At2g42740.       | 0.632     | 0.631     | 0.577     | 0.744  |
| A008857_01 | At2g32690 | unknown protein; protein id: At2g32690.1                 | 1.457     | 1.076     | 0.763     | 1.128  |
| A008858_01 | At2g26230 | putative uricase subunit; protein id: At2g26230.1        | -0.756    | -0.993    | -0.235    | -0.105 |
| A008860_01 | At2g32710 | Kip-related protein 4; protein id: At2g32710.1           | -0.312 NA | NA        |           | -0.444 |
| A008861_01 | At2g32720 | putative cytochrome b5; protein id: At2g32720.1          | 0.573     | 0.217     | 0.758     | 0.697  |
| A008862_01 | At2g32730 | 26S proteasome regulatory subunit (RPN2), putativ        | 0.871     | 0.351     | 0.243     | 0.138  |
| A008863_01 | At2g32810 | glycosyl hydrolase family 35 (beta-galactosidase); p     | 0.848     | 0.408     | -0.025    | 0.313  |
| A008865_01 | At2g41110 | calmodulin (cam2); protein id: At2g41110.1               | -0.219    | -0.019    | 0.038     | 0.01   |
| A008867_01 | At2g37770 | aldo/keto reductase family; protein id: At2g37770.1      | -0.081 NA |           | -1.753 NA |        |
| A008872_01 | At3g28920 | unknown protein; protein id: At3g28920.1                 | -0.104    | 0.274     | 0.416     | 0.208  |
| A008873_01 | At3g04070 | NAM-like protein (no apical meristem); protein id: Ai    | -3.094    | -3.171    | -1.675    | -1.945 |
| A008874_01 | At3g17205 | hypothetical protein; protein id: At3g17205.1            | -0.154    | -0.242    | -0.023    | 0.268  |
| A008877_01 | At3g24170 | glutathione reductase, putative; protein id: At3g241;    | -0.329    | -0.585    | -0.168    | -0.11  |
| A008878_01 | At3g18140 | WD-repeat protein, putative; protein id: At3g18140.      | -0.161    | 0.02      | 0.002     | 0.507  |
| A008880_01 | At3g59300 | putative protein; protein id: At3g59300.1                | 0.131     | 0.092 NA  |           | 0.196  |
| A008881_01 | At3g02180 | expressed protein; protein id: At3g02180.1               | 0.933     | 0.756     | 0.802     | 0.553  |
| A008882_01 | At3g53490 | putative protein; protein id: At3g53490.1                | -0.558    | -0.562    | -0.346    | -0.732 |
| A008883_01 | At3g51010 | expressed protein; protein id: At3g51010.1               | 0.709     | 1.076     | 0.928     | 0.725  |
| A008889_01 | At3g19910 | expressed protein; protein id: At3g19910.1               | 0.469 NA  |           | -0.803    | -1.017 |
| A008890_01 | At3g20800 | putative cell differentiation protein; protein id: At3g2 | 0.183     | 0.035     | 0.319     | 0.387  |
| A008896_01 | At3g55920 | cyclophilin-like protein; protein id: At3g55920.1        | 0.574     | 0.587     | 0.311     | 0.257  |
| A008899_01 | At3g44850 | putative protein; protein id: At3g44850.1                | 0.413     | 0.416 NA  |           | 0.551  |
| A008904_01 | At3g62870 | 60S RIBOSOMAL PROTEIN L7A protein; protein id            | 0.854     | 0.959     | 0.899     | 1.205  |
| A008906_01 | At3g46620 | putative protein; protein id: At3g46620.1                | -0.815    | -0.571    | -0.077    | -0.456 |
| A008909_01 | At3g26900 | putative shikimate kinase; protein id: At3g26900.1       | 0.052     | 0.048     | -0.384    | -0.591 |
| A008913_01 | At3g03920 | putative GAR1 protein; protein id: At3g03920.1           | 0.671     | 0.594     | 0.616     | 0.783  |
| A008919_01 | At3g48240 | putative protein; protein id: At3g48240.1                | -1.15 NA  | NA        |           | 0.832  |
| A008920_01 | At3g17160 | unknown protein; protein id: At3g17160.1                 | 1.36      | 1.168     | 1.127     | 1.279  |
| A008922_01 | At3g52100 | putative protein; protein id: At3g52100.1                | -0.097    | -0.238    | 0.193     | -0.565 |
| A008924_01 | At3g62230 | putative protein; protein id: At3g62230.1                | -0.569    | -0.744    | -1.471    | -1.184 |
| A008926_01 | At3g51800 | putative nuclear DNA-binding protein G2p; protein ic     | 0.954     | 0.81      | 0.71      | 0.831  |
| A008929_01 | At3g62300 | putative protein; protein id: At3g62300.1                | 0.791     | 0.682 NA  |           | 0.975  |
| A008933_01 | At3g49530 | NAC2-like protein; protein id: At3g49530.1               | -0.307    | -0.141    | 0.086     | 0.288  |
| A008934_01 | At3g20050 | t-complex polypeptide 1 homologue; protein id: At3c      | 0.757     | 0.621     | 0.573     | 1.045  |
| A008936_01 | At3g63420 | putative protein; protein id: At3g63420.1 NA             |           | -0.059    | 0.011     | -0.383 |
| A008937_01 | At3g53020 | 60S ribosomal protein - like; protein id: At3g53020.1    | 0.657     | 0.547     | 0.624     | 0.637  |
| A008938_01 | At3g57410 | villin 3 fragment; protein id: At3g57410.1               | -0.5 NA   |           | -0.676    | -1.173 |
| A008939_01 | At3g63400 | cyclophilin -like protein; protein id: At3g63400.1       | 0.218     | 0.169     | -0.111    | 0.3    |
| A008944_01 | At3g22300 | putative 40S ribosomal protein S10; protein id: At3g     | 0.732     | 0.968     | 0.963     | 1.397  |
| A008945_01 | At3g28970 | unknown protein; protein id: At3g28970.1                 | 0.008     | -0.05     | 0.161     | 0.368  |
| A008949_01 | At3g26560 | ATP-dependent RNA helicase, putative; protein id: ;      | -0.123    | 0.001     | 0.387     | 0.795  |
| A008950_01 | At3g11900 | putative amino acid transporter protein; protein id: A   | 0.071     | -1.096    | -0.533    | -1.263 |
| A008952_01 | At3g09150 | auxin-regulated protein; protein id: At3g09150.2         | 0.008     | 0.176     | 0.211     | 0.703  |
| A008953_01 | xxxx      | b/t putative protein; protein id: At5g02240.1 and rib    | -0.027    | -0.317    | -0.14     | -0.383 |
| A008955_01 | At3g28830 | hypothetical protein; protein id: At3g28830.1            | 0.393     | -0.497    | -0.676    | -0.191 |

|            |           |                                                         |           |           |        |        |
|------------|-----------|---------------------------------------------------------|-----------|-----------|--------|--------|
| A008958_01 | At3g61180 | putative protein; protein id: At3g61180.1               | -0.604    | -0.602    | -1.1   | -0.908 |
| A008961_01 | At3g02150 | expressed protein; protein id: At3g02150.1              | -1.169    | -1.517    | -1.614 | -1.071 |
| A008963_01 | At3g12740 | membrane protein common family; protein id: At3g1       | -0.829    | -1.172    | -0.537 | -0.315 |
| A008965_01 | At3g55770 | transcription factor L2; protein id: At3g55770.1        | -0.672    | -0.752    | -0.49  | -0.396 |
| A008967_01 | At3g54670 | structural maintenance of chromosomes (SMC) - lik       | -0.253    | -0.635    | 0.096  | 0.347  |
| A008969_01 | At3g63130 | RAN GTPase activating protein 1 protein; protein id     | 0.647     | 0.771     | 0.748  | 1.507  |
| A008972_01 | At3g28780 | histone-H4-like protein; protein id: At3g28780.1        | -0.554 NA | NA        | NA     |        |
| A008973_01 | At3g57630 | RAN GTPase activating protein 1 protein; protein id     | -0.22 NA  | NA        | NA     |        |
| A008974_01 | At3g07670 | putative ribulose-1,5-bisphosphate carboxylase oxy      | -0.17     | 0.146     | -0.126 | 0.509  |
| A008975_01 | At3g53920 | sigma factor SigC; protein id: At3g53920.1              | -0.195    | -0.508    | -0.246 | -0.171 |
| A008980_01 | At3g57080 | putative protein; protein id: At3g57080.1               | 0.121     | 0.447     | 0.486  | 0.836  |
| A008981_01 | At3g04580 | putative ethylene receptor (EIN4); protein id: At3g04   | 0.456     | 0.251     | -0.144 | 0.073  |
| A008983_01 | At3g07090 | unknown protein; protein id: At3g07090.1                | -0.229    | -0.332    | 0.685  | 0.689  |
| A008984_01 | At3g12150 | unknown protein; protein id: At3g12150.1                | 0.032 NA  | NA        |        | 0.029  |
| A008985_01 | At3g07310 | expressed protein; protein id: At3g07310.1              | -1.022    | -1.004    | -0.329 | -0.639 |
| A008988_01 | At3g25530 | expressed protein; protein id: At3g25530.1              | 0.814     | 0.552     | 0.432  | 0.657  |
| A008989_01 | At3g29290 | hypothetical protein; protein id: At3g29290.1           | -0.428    | -0.556    | -0.629 | -0.221 |
| A008992_01 | At3g51610 | putative protein; protein id: At3g51610.1               | -0.118    | -0.167    | -0.037 | -0.043 |
| A008995_01 | At3g20060 | E2, ubiquitin-conjugating enzyme, putative; protein i   | -0.546    | -0.94     | -0.37  | -0.76  |
| A008997_01 | At3g61200 | putative protein; protein id: At3g61200.1               | -0.672 NA |           | -0.408 | -1.139 |
| A008999_01 | At3g05500 | stress related protein, putative; protein id: At3g0550  | 0.106     | 0.366     | 0.433  | 0.319  |
| A009005_01 | At3g12130 | KH domain/zinc finger protein; protein id: At3g12130    | -0.039    | 0.152     | 0.177  | 0.315  |
| A009011_01 | At3g22640 | expressed protein; protein id: At3g22640.1              | -2.14 NA  |           | -0.877 | -1.133 |
| A009014_01 | At3g09805 | putative isocitrate dehydrogenase (NAD+); protein id    | 0.355     | 0.236     | 0.508  | 0.811  |
| A009016_01 | At3g22310 | putative RNA helicase; protein id: At3g22310.1          | 0.511     | 0.632     | 0.665  | 0.561  |
| A009021_01 | At3g45620 | putative protein; protein id: At3g45620.1               | -0.22     | -0.288 NA | NA     |        |
| A009022_01 | At3g09770 | expressed protein; protein id: At3g09770.1              | -0.422    | -0.887    | -0.306 | -0.799 |
| A009026_01 | At3g62240 | putative zinc-finger protein; protein id: At3g62240.1   | -0.285 NA | NA        |        | -0.483 |
| A009028_01 | At3g22960 | pyruvate kinase, putative; protein id: At3g22960.1      | 0.523     | 0.251     | 0.225  | 0.65   |
| A009031_01 | At3g56340 | 40S ribosomal protein S26 homolog; protein id: At3g     | 0.945     | 0.796     | 0.882  | 0.639  |
| A009033_01 | At3g22950 | ADP-ribosylation factor, putative; protein id: At3g22   | -0.009    | 0.021     | 0.282  | 0.185  |
| A009036_01 | At3g07360 | expressed protein; protein id: At3g07360.1              | 0.005     | -0.197    | -0.031 | 0.208  |
| A009037_01 | At3g62720 | alpha galactosyltransferase-like protein; protein id: / | 0.541     | 0.42      | 0.189  | -0.219 |
| A009044_01 | At3g62710 | glycosyl hydrolase family 3; protein id: At3g62710.1    | -0.535    | -0.263 NA | NA     |        |
| A009049_01 | At3g27300 | glucose-6-phosphate 1-dehydrogenase, putative; pr       | 0.156     | 0.208 NA  |        | 0.018  |
| A009052_01 | At3g24430 | mrp protein, putative; protein id: At3g24430.1          | 0.397     | 0.118     | 0.076  | 0.394  |
| A009055_01 | At3g56180 | putative protein; protein id: At3g56180.1               | -0.212 NA | NA        | NA     |        |
| A009056_01 | At3g29180 | expressed protein; protein id: At3g29180.1              | -0.168    | -0.367    | -0.315 | 0.19   |
| A009060_01 | At3g07100 | putative Sec24-like COPII protein; protein id: At3g07   | 0.038     | -0.241    | -0.077 | -0.257 |
| A009064_01 | At3g56140 | chloroplast lumen common protein family; protein id     | -0.946    | -0.668    | -1.127 | -0.514 |
| A009072_01 | At3g16785 | phospholipase D zeta1 (5' fragment); protein id: At3    | -0.737    | -0.588 NA |        | -0.323 |
| A009073_01 | At3g59090 | putative protein; protein id: At3g59090.1               | -0.273 NA | NA        |        | -0.05  |
| A009076_01 | At3g02050 | putative potassium transporter; protein id: At3g0205    | -0.063    | 0.17      | 0.149  | 0.442  |
| A009077_01 | At3g25690 | unknown protein; protein id: At3g25690.1                | -1.305    | -1.159    | -1.039 | -1.203 |
| A009081_01 | At3g11380 | hypothetical protein; protein id: At3g11380.1           | -0.629    | -0.595    | -0.702 | -1.008 |
| A009087_01 | At3g45140 | lipxygenase AtLOX2; protein id: At3g45140.1             | 1.42      | 0.947     | -0.017 | 0.757  |
| A009088_01 | At3g04910 | putative mitogen activated protein kinase kinase; pr    | -1.141    | -1.272    | -0.597 | -0.539 |
| A009095_01 | At3g26744 | bHLH protein; protein id: At3g26744.1                   | 0.265     | 0.268     | 0.253  | 0.419  |
| A009099_01 | At3g51460 | putative protein; protein id: At3g51460.1               | -0.066    | -0.011    | 0.007  | 0.061  |
| A009102_01 | At3g62530 | putative protein; protein id: At3g62530.1               | 0.778     | 0.379     | 0.447  | 0.88   |
| A009105_01 | At3g09830 | putative protein kinase; protein id: At3g09830.1        | -1.791 NA | NA        |        | -1.555 |
| A009106_01 | At3g22200 | aminotransferase, putative; protein id: At3g22200.1     | -0.558    | -0.152    | -0.284 | -0.299 |
| A009107_01 | At3g57520 | glycosyl hydrolase family 36; protein id: At3g57520.    | -0.868    | -0.999    | -0.628 | -0.496 |
| A009112_01 | At3g51950 | putative protein; protein id: At3g51950.1               | -0.998    | 0.256 NA  |        | 0.918  |
| A009113_01 | At3g55480 | AP3-complex beta-3A adaptin subunit-like protein; p     | 0.2       | 0.222     | 0.081  | 0.589  |
| A009114_01 | At3g17210 | expressed protein; protein id: At3g17210.1              | 0.291     | 0.098     | -0.23  | -0.785 |
| A009121_01 | At3g63210 | putative protein; protein id: At3g63210.1               | -0.942 NA |           | 0.075  | -1.149 |
| A009127_01 | At3g12930 | expressed protein; protein id: At3g12930.1              | 0.86      | 0.999     | 0.503  | 0.539  |
| A009134_01 | At3g16620 | putative GTP-binding protein; protein id: At3g16620     | 0.419     | 0.414 NA  |        | 0.526  |
| A009138_01 | At3g14350 | leucine-rich repeat transmembrane protein kinase, p     | 0.74      | 0.649     | 0.286  | 0.487  |
| A009139_01 | At3g51600 | non-specific lipid transfer protein; protein id: At3g51 | -0.57     | -0.454    | -1.081 | -1.082 |
| A009145_01 | At3g16220 | hypothetical protein; protein id: At3g16220.1           | -0.719    | -1.406    | -0.729 | -0.766 |
| A009147_01 | At3g18130 | protein kinase C-receptor/G-protein, putative; protei   | 1.306     | 0.993     | 1.133  | 1.568  |
| A009148_01 | At3g16250 | putative 2Fe-2S iron-sulfur cluster protein; protein ic | 0.475     | 0.476     | 0.16   | -0.155 |
| A009151_01 | At3g14860 | hypothetical protein; protein id: At3g14860.1           | -0.034 NA | NA        |        | 0.071  |
| A009152_01 | At3g16310 | expressed protein; protein id: At3g16310.1              | 0.386     | 0.316     | 0.255  | 0.207  |
| A009153_01 | At3g54800 | putative protein; protein id: At3g54800.1               | 0.99      | -0.653 NA | NA     |        |
| A009156_01 | At3g14850 | hypothetical protein; protein id: At3g14850.1           | 0.224     | -0.076 NA | NA     |        |



|            |           |                                                        |        |        |        |        |
|------------|-----------|--------------------------------------------------------|--------|--------|--------|--------|
| A009163_01 | At3g25470 | hemolysin, putative; protein id: At3g25470.1           | 0.532  | 0.336  | 0.098  | 0.218  |
| A009165_01 | At3g26100 | expressed protein; protein id: At3g26100.1             | -1.401 | -1.496 | -0.178 | -0.218 |
| A009169_01 | At3g27025 | pseudogene, unknown protein At3g27025                  | NA     | NA     | NA     | NA     |
| A009176_01 | At3g23080 | expressed protein; protein id: At3g23080.1             | -0.356 | -0.447 | -0.603 | -1.122 |
| A009182_01 | At3g21290 | expressed protein; protein id: At3g21290.1             | -0.088 | -0.359 | NA     | NA     |
| A009187_01 | At3g28270 | At14a; protein id: At3g28270.1                         | -3.122 | -3.734 | -1.873 | -2.057 |
| A009189_01 | At3g28230 | unknown protein; protein id: At3g28230.1               | 0.324  | 0.647  | NA     | 0.972  |
| A009196_01 | At3g55010 | phosphoribosylformylglycinamide cyclo-ligase pre-      | 0.592  | 0.787  | 0.79   | 1.165  |
| A009203_01 | At3g50790 | putative LEA protein; protein id: At3g50790.1          | -0.048 | NA     | -0.107 | -0.34  |
| A009205_01 | At3g01470 | homeobox-leucine zipper protein HAT5 (HD-ZIP prc       | -1.325 | -1.31  | NA     | NA     |
| A009221_01 | At3g63310 | putative protein; protein id: At3g63310.1              | -1.097 | -1.227 | -0.369 | -0.771 |
| A009227_01 | At3g15360 | thioredoxin m4; protein id: At3g15360.1                | -0.743 | -0.512 | -0.667 | -0.707 |
| A009233_01 | At3g43120 | indole-3-acetic acid induced protein, related; protein | -0.775 | -0.385 | NA     | NA     |
| A009248_01 | At3g20910 | CCAAT-binding factor B chain, putative; protein id: ,  | -0.542 | NA     | NA     | -0.405 |
| A009255_01 | At3g22240 | expressed protein; protein id: At3g22240.1             | 0.349  | 0.413  | 0.72   | 0.098  |
| A009256_01 | At3g04840 | putative 40S ribosomal protein S3A (S phase specif     | 0.776  | 0.692  | 0.738  | 1.275  |
| A009257_01 | At3g62330 | putative protein; protein id: At3g62330.1              | -0.075 | -0.395 | NA     | 0.233  |
| A009260_01 | At3g58780 | MADS-box protein; protein id: At3g58780.1              | 0.264  | 0.337  | 0.32   | 0.221  |
| A009262_01 | At3g42830 | RING-box protein Roc1/Rbx1/Hrt1, putative; protein     | 0.648  | 0.08   | 0.306  | -0.247 |
| A009270_01 | At3g52640 | A.t. AT3g29320/MUO10_2 mRNA, complete cds              | 0.508  | 0.655  | NA     | 0.321  |
| A009272_01 | At3g24500 | ethylene-responsive transcriptional coactivator, puta  | -1.326 | -0.846 | -0.031 | -0.209 |
| A009273_01 | At3g24590 | chloroplast thylakoidal processing peptidase, putativ  | 0.27   | 0.238  | 0.26   | 0.093  |
| A009281_01 | At3g22290 | unknown protein; protein id: At3g22290.1               | 0.239  | NA     | -0.239 | -0.212 |
| A009282_01 | At3g22330 | putative RNA helicase; protein id: At3g22330.1         | 0.396  | 0.346  | 0.389  | 0.05   |
| A009284_01 | At3g01640 | expressed protein; protein id: At3g01640.1             | 0.242  | 0.495  | 0.018  | 0.249  |
| A009289_01 | At3g17670 | hypothetical protein; protein id: At3g17670.1          | -0.44  | -0.316 | 0.181  | -0.439 |
| A009293_01 | At3g48880 | F-box protein family; protein id: At3g48880.2          | NA     | -0.668 | -0.191 | -0.622 |
| A009296_01 | At3g27090 | gda-1, putative; protein id: At3g27090.1               | -0.962 | -1.227 | -0.624 | -0.569 |
| A009303_01 | At3g16520 | putative glucosyltransferase; protein id: At3g16520.   | -0.639 | -0.723 | -0.545 | -0.466 |
| A009305_01 | At3g22750 | expressed protein; protein id: At3g22750.1             | -1.05  | NA     | -1.1   | -1.06  |
| A009307_01 | At3g53890 | 40S ribosomal protein S21 homolog; protein id: At3g    | 1.076  | 0.847  | 0.884  | 1.421  |
| A009309_01 | At3g53930 | AtAPG1b; putative protein; protein id: At3g53930.1     | -0.64  | -0.679 | NA     | -0.425 |
| A009312_01 | At3g07880 | putative RHO GDP-dissociation inhibitor 1; protein i   | -0.11  | -0.013 | -0.134 | -0.351 |
| A009325_01 | At3g29320 | glucan phosphorylase, putative; protein id: At3g293    | 1.592  | 1.429  | 0.759  | 1.482  |
| A009328_01 | At3g56880 | putative protein; protein id: At3g56880.1              | -1.875 | -1.461 | -0.108 | -0.704 |
| A009340_01 | At3g18760 | expressed protein; protein id: At3g18760.1             | 1.273  | 1.231  | 1.176  | 1.173  |
| A009343_01 | At3g54440 | expressed protein; protein id: At3g54440.1             | -0.424 | -0.527 | -0.673 | -0.598 |
| A009348_01 | At3g29185 | hypothetical protein; protein id: At3g29185.1          | 0.243  | 0.062  | 0.02   | 0.303  |
| A009353_01 | At3g27890 | NADPH:quinone oxidoreductase (NQR); protein id: .      | -0.498 | -0.239 | -0.203 | -0.151 |
| A009354_01 | At3g54620 | expressed protein; protein id: At3g54620.1             | -0.758 | -0.905 | -0.634 | -0.4   |
| A009368_01 | At3g51420 | strictosidine synthase-related; protein id: At3g51420  | -1.243 | -1.14  | -0.868 | -1.006 |
| A009369_01 | At3g46210 | putative protein; protein id: At3g46210.1              | 0.339  | 0.322  | 0.658  | 1.031  |
| A009370_01 | At3g46220 | putative protein; protein id: At3g46220.1              | 0.199  | -0.282 | NA     | -0.034 |
| A009371_01 | At3g51550 | receptor-protein kinase-like protein; protein id: At3g | -0.112 | 0.032  | -0.437 | -0.791 |
| A009375_01 | At3g51620 | putative protein; protein id: At3g51620.1              | -0.729 | -0.664 | NA     | -0.095 |
| A009377_01 | At3g60850 | putative protein; protein id: At3g60850.1              | -0.059 | NA     | NA     | -0.923 |
| A009378_01 | At3g27820 | monodehydroascorbate reductase, putative; protein      | -1.308 | -1.194 | -0.969 | -1.228 |
| A009380_01 | At3g59150 | putative protein; protein id: At3g59150.1              | -0.614 | -0.546 | NA     | 0.02   |
| A009390_01 | At3g26070 | unknown protein; protein id: At3g26070.1               | 0.015  | -0.098 | -0.071 | -0.065 |
| A009396_01 | At3g14910 | hypothetical protein; protein id: At3g14910.1          | -1.058 | NA     | NA     | NA     |
| A009398_01 | At3g59400 | putative protein; protein id: At3g59400.1              | -0.466 | -0.119 | -0.156 | -0.517 |
| A009399_01 | At3g14920 | hypothetical protein; protein id: At3g14920.1          | -0.177 | -0.41  | -0.309 | -0.24  |
| A009402_01 | At3g19340 | unknown protein; protein id: At3g19340.1               | -0.567 | NA     | NA     | -0.004 |
| A009409_01 | At3g15050 | hypothetical protein; protein id: At3g15050.1          | -1.01  | NA     | NA     | NA     |
| A009410_01 | At3g60810 | putative protein; protein id: At3g60810.1              | -0.612 | 0.584  | -0.319 | 0.198  |
| A009411_01 | At3g23690 | bHLH protein; protein id: At3g23690.1                  | -0.036 | 0.081  | -0.238 | -0.824 |
| A009413_01 | At3g12880 | hypothetical protein; protein id: At3g12880.1          | 0.813  | 0.736  | 0.813  | 1.343  |
| A009414_01 | At3g23730 | xyloglucan endotransglycosylase, putative; protein i   | 0.475  | 0.62   | 0.499  | 0.339  |
| A009415_01 | At3g23790 | AMP-binding protein, putative; protein id: At3g23790   | -0.12  | NA     | NA     | -0.43  |
| A009426_01 | xxxx      | b/t pseudogene, cytochrome P450; protein id: At3g2     | -0.9   | -0.736 | -0.478 | -0.906 |
| A009431_01 | At3g19390 | cysteine proteinase; protein id: At3g19390.1           | 1.097  | 0.947  | NA     | 0.859  |
| A009432_01 | At3g12850 | hypothetical protein; protein id: At3g12850.1          | 0.283  | NA     | NA     | 0.354  |
| A009434_01 | At3g57720 | protein kinase - like protein; protein id: At3g57720.1 | -1.753 | NA     | -0.71  | -1.251 |
| A009435_01 | At3g20220 | hypothetical protein; protein id: At3g20220.1          | -0.28  | -0.139 | NA     | NA     |
| A009448_01 | At3g48220 | hypothetical protein; protein id: At3g48220.1          | -0.471 | -0.275 | -0.167 | 0.097  |
| A009454_01 | At3g24700 | hypothetical protein; protein id: At3g24700.1          | 0.387  | 0.407  | 0.355  | 0.798  |
| A009457_01 | At3g02370 | hypothetical protein; protein id: At3g02370.1          | -0.197 | NA     | 0.028  | -0.389 |
| A009475_01 | At3g18550 | hypothetical protein; protein id: At3g18550.1          | -0.146 | -0.326 | -0.3   | -0.161 |

|            |           |                                                                                   |           |           |        |        |
|------------|-----------|-----------------------------------------------------------------------------------|-----------|-----------|--------|--------|
| A009480_01 | At3g18560 | expressed protein; protein id: At3g18560.1                                        | 0.697     | 0.713     | 0.606  | 0.501  |
| A009485_01 | At3g55730 | myb transcription factor - like protein; protein id: At3 NA                       | NA        |           | -0.642 | -0.936 |
| A009491_01 | At3g30370 | hypothetical protein; protein id: At3g30370.1                                     | 0.409     | 0.674 NA  |        | 0.836  |
| A009495_01 | At3g21640 | peptidylprolyl isomerase, putative; protein id: At3g2 NA                          |           | 0.7       | 0.299  | 0.102  |
| A009496_01 | At3g44280 | putative protein; protein id: At3g44280.1                                         | 0.428 NA  |           | 0.576  | 0.638  |
| A009497_01 | At3g20710 | hypothetical protein; protein id: At3g20710.1                                     | 0.221 NA  |           | -0.004 | -0.577 |
| A009498_01 | At3g43600 | aldehyde oxidase; protein id: At3g43600.1                                         | 0.969     | 0.845     | 0.183  | 0.112  |
| A009501_01 | At3g48740 | MTN3-like protein; protein id: At3g48740.1                                        | -3.412    | -3.402    | -1.958 | -3.46  |
| A009502_01 | At3g21630 | putative protein kinase; protein id: At3g21630.1                                  | -0.101 NA |           | NA     | -0.557 |
| A009506_01 | At3g43230 | putative protein; protein id: At3g43230.1                                         | -1.413    | -1.589    | -0.423 | -0.726 |
| A009507_01 | At3g19553 | amino acid permease, putative; protein id: At3g19553.1                            | -2.751 NA |           | -0.626 | -1.179 |
| A009512_01 | At3g53210 | putative protein; protein id: At3g53210.1                                         | -0.569    | -0.203    | -0.362 | -0.588 |
| A009513_01 | At3g52610 | expressed protein; protein id: At3g52610.1                                        | -0.067 NA |           | NA     | 0.095  |
| A009514_01 | At3g13460 | unknown protein; protein id: At3g13460.1                                          | -0.082 NA |           | -1.286 | -1.104 |
| A009515_01 | At3g05400 | sugar transporter, putative; protein id: At3g05400.1                              | -2.142    | -2.855    | -1.922 | -2.557 |
| A009517_01 | At3g51670 | putative protein; protein id: At3g51670.1                                         | 0.755     | 0.537     | 0.423  | 0.772  |
| A009523_01 | At3g49160 | pyruvate kinase -like protein; protein id: At3g49160.1                            | -0.279    | -0.429    | -0.444 | -0.339 |
| A009525_01 | At3g53420 | plasma membrane intrinsic protein 2a; protein id: At3g53420.1                     | -1.669    | -1.884    | -0.333 | -1.21  |
| A009530_01 | At3g21550 | expressed protein; protein id: At3g21550.1                                        | -0.733    | -1.043    | -0.161 | -0.306 |
| A009531_01 | At3g17300 | expressed protein; protein id: At3g17300.1                                        | 0.301     | 0.5       | 0.685  | 0.49   |
| A009534_01 | At3g02830 | zinc finger protein 1 (zfn1); protein id: At3g02830.1                             | -0.14     | -0.059    | 0.267  | 0.11   |
| A009537_01 | At3g49880 | glycosyl hydrolase family 43; protein id: At3g49880.1                             | -0.448 NA |           | NA     | -0.264 |
| A009540_01 | At3g14060 | expressed protein; protein id: At3g14060.1                                        | -0.143    | 0.228 NA  |        | -0.784 |
| A009542_01 | At3g11290 | expressed protein; protein id: At3g11290.1                                        | -0.127 NA |           | NA     | 0.272  |
| A009543_01 | At3g16080 | putative ribosomal protein; protein id: At3g16080.1                               | 0.95      | 1.034     | 1.074  | 1.026  |
| A009544_01 | At3g52740 | expressed protein; protein id: At3g52740.1                                        | -0.623    | -0.145 NA |        | NA     |
| A009545_01 | At3g16090 | putative zinc finger protein; protein id: At3g16090.1                             | 0.077 NA  |           | NA     | -0.221 |
| A009548_01 | At3g57890 | putative protein; protein id: At3g57890.1                                         | -0.057 NA |           | -0.164 | 0.141  |
| A009549_01 | At3g57930 | putative protein; protein id: At3g57930.1                                         | 0.135     | 0.118     | 0.075  | -0.238 |
| A009551_01 | At3g45780 | nonphototropic hypocotyl 1; protein id: At3g45780.1                               | -1.069    | -0.85     | -1.004 | -0.877 |
| A009557_01 | At3g12320 | expressed protein; protein id: At3g12320.1                                        | -1.828    | -2.099    | -0.469 | -0.526 |
| A009560_01 | At3g52760 | hypothetical protein; protein id: At3g52760.1                                     | -0.043    | -0.017    | 0.083  | -0.301 |
| A009561_01 | At3g47430 | putative protein; protein id: At3g47430.1                                         | -0.056 NA |           | NA     | NA     |
| A009563_01 | At3g42150 | expressed protein; protein id: At3g42150.1                                        | 0.311     | 0.428     | 0.459  | 0.378  |
| A009566_01 | At3g55360 | synaptic glycoprotein SC2-like protein; protein id: At3g55360.1                   | 0.644     | 0.467     | 0.657  | 1.167  |
| A009567_01 | At3g58110 | putative protein; protein id: At3g58110.1                                         | 0.011     | 0.036     | 0.146  | 0.758  |
| A009568_01 | At3g15640 | putative cytochrome c oxidase subunit Vb; protein id: At3g15640.1                 | 0.72      | 0.961     | 0.77   | 0.762  |
| A009573_01 | At3g17860 | expressed protein; protein id: At3g17860.1                                        | -0.761    | -0.74     | -0.718 | -0.857 |
| A009579_01 | At3g56940 | leucine zipper-containing protein AT103; protein id: At3g56940.1                  | 0.091     | -0.187    | -0.158 | 0.206  |
| A009580_01 | At3g17880 | thioredoxin, putative; protein id: At3g17880.1                                    | -0.922    | -0.153    | -0.189 | 0.311  |
| A009581_01 | At3g05420 | unknown protein; protein id: At3g05420.1                                          | 0.27      | 0.318 NA  |        | -0.181 |
| A009583_01 | At3g47250 | putative protein; protein id: At3g47250.1                                         | -2.344    | -2.421    | -1.495 | -1.777 |
| A009590_01 | At3g06550 | unknown protein; protein id: At3g06550.1                                          | 0.621     | 0.105     | 0.066  | 0.237  |
| A009594_01 | At3g17980 | unknown protein; protein id: At3g17980.1                                          | -0.45     | -0.746 NA |        | NA     |
| A009595_01 | At3g20720 | unknown protein; protein id: At3g20720.1                                          | 0.064     | -0.215 NA |        | -0.22  |
| A009603_01 | At3g14560 | expressed protein; protein id: At3g14560.1                                        | 0.048     | 0.033     | 0.673  | -0.244 |
| A009609_01 | At3g15760 | expressed protein; protein id: At3g15760.1                                        | NA        | NA        | NA     | NA     |
| A009611_01 | At3g08590 | putative 2,3-bisphosphoglycerate-independent phosphatase; protein id: At3g08590.1 | 0.295     | 0.17      | 0.189  | 0.184  |
| A009614_01 | At3g13235 | expressed protein; protein id: At3g13235.1                                        | 0.261     | 0.388     | 0.305  | 0.204  |
| A009618_01 | At3g10610 | putative 40S ribosomal protein S17; protein id: At3g10610.1                       | 1.104     | 1.205     | 1.5    | 1.809  |
| A009619_01 | At3g15660 | expressed protein; protein id: At3g15660.1                                        | 0.052     | -0.199    | 0.141  | 0.219  |
| A009625_01 | At3g10640 | unknown protein; protein id: At3g10640.1                                          | -0.386 NA |           | NA     | -0.279 |
| A009627_01 | At3g23410 | expressed protein; protein id: At3g23410.1                                        | 0.427     | 0.154     | -0.277 | -0.163 |
| A009632_01 | At3g54970 | expressed protein; protein id: At3g54970.1                                        | 0.428 NA  |           | 0.527  | 0.713  |
| A009633_01 | At3g23400 | expressed protein; protein id: At3g23400.1                                        | 0.202     | -0.043    | -0.426 | -0.63  |
| A009639_01 | At3g05030 | putative sodium proton exchanger; protein id: At3g05030.1                         | 0.265     | 0.177 NA  |        | -0.248 |
| A009641_01 | At3g04930 | unknown protein; protein id: At3g04930.1                                          | -0.143    | -0.624    | -0.629 | -0.474 |
| A009660_01 | At3g11490 | putative rac GTPase activating protein; protein id: At3g11490.1                   | 0.098     | 0.074     | 0.254  | 0.583  |
| A009661_01 | At3g19670 | unknown protein; protein id: At3g19670.1                                          | -0.039    | -0.239 NA |        | -0.309 |
| A009663_01 | At3g22520 | unknown protein; protein id: At3g22520.1                                          | 0.182 NA  |           | -0.047 | 0.486  |
| A009665_01 | At3g01250 | hypothetical protein; protein id: At3g01250.1                                     | -0.109    | -0.67     | -1.298 | -0.946 |
| A009670_01 | At3g18980 | expressed protein; protein id: At3g18980.1                                        | 0.043     | -0.117    | -0.177 | -0.389 |
| A009676_01 | At3g07590 | putative small nuclear ribonucleoprotein (Sm-D1); protein id: At3g07590.1         |           | 0.89      | 0.893  | 0.77   |
| A009682_01 | At3g07680 | putative coated vesicle membrane protein; protein id: At3g07680.1                 | 0.617     | 0.397     | 0.226  | 0.678  |
| A009684_01 | At3g20390 | translational inhibitor protein, putative; protein id: At3g20390.1                | 0.907     | 0.869     | 0.31   | 0.216  |
| A009688_01 | At3g07750 | putative 3 exoribonuclease; protein id: At3g07750.1                               | 0.632 NA  |           | 0.505  | 0.704  |
| A009691_01 | At3g21070 | unknown protein; protein id: At3g21070.1                                          | -0.464    | -0.44     | -0.39  | -0.391 |
| A009693_01 | At3g28480 | prolyl 4-hydroxylase, putative; protein id: At3g28480.1                           | 0.451 NA  |           | -0.063 | -0.008 |

|            |               |                                                                       |        |    |        |        |        |
|------------|---------------|-----------------------------------------------------------------------|--------|----|--------|--------|--------|
| A009699_01 | At3g03750     | hypothetical protein; protein id: At3g03750.1                         | -0.1   | NA | NA     | NA     |        |
| A009711_01 | At3g59920     | Rab GDP dissociation inhibitor; protein id: At3g59920.1               | 0.255  |    | 0.03   | 0.291  | 0.753  |
| A009713_01 | At3g05220     | unknown protein; protein id: At3g05220.1                              |        | NA | 0.067  | 0.042  | -0.302 |
| A009728_01 | At3g19280     | fucosyltransferase, putative; protein id: At3g19280.1                 | -0.214 | NA |        | NA     | NA     |
| A009731_01 | At3g14180     | hypothetical protein; protein id: At3g14180.1                         | 0.199  |    | 0.238  | 0.113  | -0.368 |
| A009733_01 | At3g14205     | expressed protein; protein id: At3g14205.1                            |        | NA |        | NA     | -0.276 |
| A009737_01 | At3g13440     | methyltransferase, putative; protein id: At3g13440.1                  | 0.024  |    | -0.001 | NA     | -0.108 |
| A009738_01 | At3g46930     | protein kinase 6-like protein; protein id: At3g46930.1                | -0.944 | NA |        | NA     | -1.222 |
| A009740_01 | At3g57390     | MADS-box protein; protein id: At3g57390.1                             | -0.771 |    | -0.945 | -0.606 | -1.047 |
| A009744_01 | At3g07460     | expressed protein; protein id: At3g07460.1                            | 0.561  |    | 0.496  | 0.21   | 0.16   |
| A009746_01 | At3g07510     | expressed protein; protein id: At3g07510.1                            | 0.166  |    | 0.53   | 0.386  | 0.224  |
| A009751_01 | At3g07470     | expressed protein; protein id: At3g07470.1                            | 0.315  |    | 0.171  | 0.077  | 0.049  |
| A009752_01 | At3g07340     | bHLH protein; protein id: At3g07340.1                                 | -0.643 | NA |        | NA     | -1.771 |
| A009753_01 | At3g23830     | A.t. reversibly glycosylated polypeptide-1 (AtRGP) repeat             | 1.337  |    | 1.442  | 1.353  | 1.816  |
| A009755_01 | At3g10360     | pumilio-family RNA-binding protein, putative; protein id: At3g10360.1 | 0.269  | NA |        | NA     | -0.14  |
| A009761_01 | At3g10220     | putative cytoskeleton-associated protein; protein id: At3g10220.1     | 0.644  |    | 0.481  | 0.299  | 0.492  |
| A009762_01 | At3g10210     | expressed protein; protein id: At3g10210.1                            | -0.481 | NA |        | 0.062  | -0.084 |
| A009764_01 | At3g24010     | PHD-finger protein, putative; protein id: At3g24010.1                 | -0.317 |    | -0.3   | 0.055  | 0.275  |
| A009765_01 | At3g24190     | expressed protein; protein id: At3g24190.1                            | -0.995 |    | -1.01  | -0.662 | -1.142 |
| A009766_01 | At3g10190     | calmodulin-like protein; protein id: At3g10190.1                      | 0.009  |    | 0.261  | 0.593  | 0.184  |
| A009769_01 | At3g02230     | reversibly glycosylated polypeptide-1; protein id: At3g02230.1        | 0.659  |    | 0.518  | 0.598  | 0.862  |
| A009770_01 | At3g24140     | helix-loop-helix DNA-binding protein; protein id: At3g24140.1         | -0.446 | NA |        | NA     | NA     |
| A009776_01 | At3g53280     | cytochrome P450 monooxygenase; protein id: At3g53280.1                |        | NA |        | NA     | NA     |
| A009777_01 | At3g18290     | zinc finger protein, putative; protein id: At3g18290.1                | -0.792 |    | -0.635 | -0.742 | -1.104 |
| A009780_01 | At3g01520     | expressed protein; protein id: At3g01520.1                            | -0.92  |    | -0.94  | -0.555 | -1.31  |
| A009784_01 | At3g01610     | putative cell division control protein; protein id: At3g01610.1       | 0.161  |    | -0.264 | NA     | 0.223  |
| A009787_01 | At3g01660     | hypothetical protein; protein id: At3g01660.1                         | -1.223 | NA |        | NA     | NA     |
| A009790_01 | xxxx          | expressed protein; protein id: At3g14430.1                            | 0.029  |    | -0.148 | 0.283  | -0.038 |
| A009792_01 | At3g19810     | expressed protein; protein id: At3g19810.1                            | 0.474  |    | 0.564  | 0.279  | 0.414  |
| A009796_01 | At3g01770     | expressed protein; protein id: At3g01770.1                            | -0.559 |    | -0.791 | -0.474 | 0.097  |
| A009797_01 | At3g48500     | hypothetical protein; protein id: At3g48500.1                         | 0.812  |    | 0.7    | -0.071 | 0.341  |
| A009803_01 | At3g03480     | putative hypersensitivity-related gene; protein id: At3g03480.1       | -0.977 |    | -1.435 | -1.453 | -1.947 |
| A009805_01 | At3g52060     | putative protein; protein id: At3g52060.1                             | -0.795 | NA |        | -0.087 | -0.894 |
| A009809_01 | At3g03340     | expressed protein; protein id: At3g03340.1                            | -0.389 |    | -0.177 | -0.045 | 0.164  |
| A009811_01 | At3g03310     | expressed protein; protein id: At3g03310.1                            | -0.222 |    | -0.257 | -0.433 | -0.08  |
| A009821_01 | At3g26630     | unknown protein; protein id: At3g26630.1                              | -0.458 | NA |        | NA     | -0.511 |
| A009822_01 | At3g11600     | expressed protein; protein id: At3g11600.1                            | -0.375 |    | 0.009  | 0.431  | 0.171  |
| A009826_01 | At3g51120     | putative protein; protein id: At3g51120.1                             | -0.326 | NA |        | NA     | NA     |
| A009834_01 | At3g53870     | 40S ribosomal protein S3, putative; protein id: At3g53870.1           | 0.469  |    | 0.29   | 0.426  | 0.62   |
| A009836_01 | At3g01970     | WRKY family transcription factor; protein id: At3g01970.1             | -2.43  | NA |        | NA     | NA     |
| A009843_01 | At3g57280     | expressed protein; protein id: At3g57280.1                            | -0.355 |    | 0.137  | -0.253 | -0.411 |
| A009845_01 | not annotated | Chr3 C/9929563-9929632                                                | -0.501 |    | -0.36  | NA     | NA     |
| A009846_01 | At3g50910     | putative protein; protein id: At3g50910.1                             | -0.619 |    | -0.583 | -0.172 | -0.162 |
| A009848_01 | At3g02140     | expressed protein; protein id: At3g02140.1                            | -1.998 |    | -2.183 | -1.168 | -2.639 |
| A009849_01 | At3g57340     | DnaJ-like protein; protein id: At3g57340.1                            | -0.311 |    | -0.373 | -0.408 | -0.149 |
| A009855_01 | At3g04620     | unknown protein; protein id: At3g04620.1                              | -0.102 |    | 0.221  | NA     | NA     |
| A009864_01 | At3g20560     | expressed protein; protein id: At3g20560.1                            | 0.576  | NA |        | 0.161  | 0.583  |
| A009867_01 | At3g61460     | RING finger protein; protein id: At3g61460.1                          | -1.047 |    | -0.577 | -0.103 | -0.474 |
| A009868_01 | At3g61560     | putative protein; protein id: At3g61560.1                             | 0.495  |    | 0.39   | 0.453  | 0.58   |
| A009870_01 | At3g04670     | WRKY family transcription factor; protein id: At3g04670.1             | -0.041 | NA |        | NA     | 0.369  |
| A009879_01 | At3g10090     | putative ribosomal protein S28; protein id: At3g10090.1               | 0.485  |    | 0.715  | 0.694  | 0.883  |
| A009885_01 | At3g09980     | unknown protein; protein id: At3g09980.1                              | -0.116 |    | -0.863 | -0.261 | -0.497 |
| A009890_01 | At3g30775     | hypothetical protein; protein id: At3g30775.1                         | -0.481 |    | -0.67  | -0.442 | -0.173 |
| A009894_01 | At3g56680     | putative protein; protein id: At3g56680.1                             | -0.213 |    | -0.157 | -0.53  | -0.451 |
| A009895_01 | At3g19870     | unknown protein; protein id: At3g19870.1                              | -0.206 |    | -0.096 | -0.076 | -0.265 |
| A009898_01 | At3g18480     | expressed protein; protein id: At3g18480.1                            | 0.182  |    | 0.185  | 0.312  | 0.56   |
| A009900_01 | At3g50840     | putative protein; protein id: At3g50840.1                             |        | NA |        | NA     | NA     |
| A009902_01 | At3g56720     | putative protein; protein id: At3g56720.1                             | 0.148  |    | 0.051  | -0.16  | -0.15  |
| A009905_01 | At3g06430     | unknown protein; protein id: At3g06430.1                              | 0.536  |    | 0.408  | -0.167 | 0.225  |
| A009906_01 | At3g06420     | AtAPG8h; expressed protein; protein id: At3g06420.1                   | -2.114 |    | -2.109 | -0.943 | -1.716 |
| A009911_01 | At3g15000     | expressed protein; protein id: At3g15000.1                            | 0.994  |    | 0.97   | 0.801  | 1.078  |
| A009916_01 | At3g61980     | expressed protein; protein id: At3g61980.1                            | -0.449 |    | -0.088 | 0.105  | -0.529 |
| A009920_01 | At3g29310     | hypothetical protein; protein id: At3g29310.1                         | 0.129  |    | 0.06   | -0.007 | 0.1    |
| A009926_01 | At3g05610     | putative pectinesterase; protein id: At3g05610.1                      | -0.629 | NA |        | NA     | NA     |
| A009927_01 | At3g63410     | putative chloroplast inner envelope protein; protein id: At3g63410.1  | 0.627  |    | 0.585  | 0.147  | 0.172  |
| A009934_01 | At3g47860     | putative protein; protein id: At3g47860.1                             | 1.447  |    | 1.507  | 0.793  | 1.144  |
| A009939_01 | At3g03070     | expressed protein; protein id: At3g03070.1                            | 0.074  |    | 0.269  | 0.473  | -0.338 |
| A009941_01 | At3g11960     | hypothetical protein; protein id: At3g11960.1                         | -0.717 |    | -0.717 | NA     | NA     |

|            |               |                                                                                                |           |           |          |        |
|------------|---------------|------------------------------------------------------------------------------------------------|-----------|-----------|----------|--------|
| A009948_01 | At3g56910     | ribosomal protein, chloroplast; protein id: At3g56910                                          | 0.57      | 0.413     | 0.138    | -0.139 |
| A009949_01 | At3g54640     | tryptophan synthase alpha chain; protein id: At3g54640                                         | 0.689     | 0.602     | 0.515    | 1.294  |
| A009956_01 | At3g07160     | callose synthase (1,3-beta-glucan synthase) family; expressed protein; protein id: At3g07160.1 | -0.159    | -0.484    | -0.296   | -0.504 |
| A009958_01 | At3g07140     | expressed protein; protein id: At3g07140.1                                                     | 0.262     | 0.531     | -0.098   | 0.506  |
| A009960_01 | At3g49050     | calmodulin-binding heat-shock protein; protein id: At3g49050                                   | 0.102 NA  |           | 0.111    | 0.38   |
| A009964_01 | At3g02420     | expressed protein; protein id: At3g02420.1                                                     | 0.036     | 0.069     | 0.225    | 0.274  |
| A009965_01 | At3g01690     | unknown protein; protein id: At3g01690.1                                                       | -0.2      | -0.135    | 0.261    | -0.149 |
| A009968_01 | At3g09250     | expressed protein; protein id: At3g09250.1                                                     | 0.202     | -0.13     | 0.035    | -0.321 |
| A009979_01 | At3g52850     | spot 3 protein and vacuolar sorting receptor homolog; protein id: At3g52850.1                  | -0.38     | -0.649    | -0.53    | -0.369 |
| A009988_01 | At3g02810     | putative protein kinase; protein id: At3g02810.1                                               | -0.415    | -0.469 NA | NA       |        |
| A009989_01 | At3g02800     | unknown protein; protein id: At3g02800.1                                                       | -1.083    | -1.017 NA |          | -0.633 |
| A009990_01 | At3g02790     | expressed protein; protein id: At3g02790.1                                                     | 0.683     | 0.58      | 0.733    | 0.244  |
| A009991_01 | At3g49100     | signal recognition particle subunit 9 - like; protein id: At3g49100                            | 0.463     | 0.536     | 0.574    | 0.242  |
| A009994_01 | At3g52230     | expressed protein; protein id: At3g52230.1                                                     | -0.395    | -0.241    | 0.002    | -0.641 |
| A009997_01 | At3g52200     | putative protein; protein id: At3g52200.1                                                      | 0.507     | 0.131     | -0.333   | 0.084  |
| A010000_01 | At3g06400     | putative ATPase (ISW2-like); protein id: At3g06400                                             | -0.152    | -0.197    | 0.016    | 0.67   |
| A010007_01 | not annotated | Chr3 W/3305936-3306005                                                                         | -0.308 NA |           | -0.488   | -0.434 |
| A010011_01 | At3g06760     | unknown protein; protein id: At3g06760.1                                                       | -0.33     | -0.01     | 0.195    | 0.46   |
| A010018_01 | At3g04500     | RRM-containing protein; protein id: At3g04500.1                                                | -0.082 NA |           | 0.072    | -0.154 |
| A010021_01 | At3g47810     | putative protein; protein id: At3g47810.1                                                      | 0.193     | 0.249     | 0.346    | 0.082  |
| A010023_01 | At3g05430     | PWWP domain protein; protein id: At3g05430.1                                                   | 0.115     | 0.267 NA  |          | 1.063  |
| A010025_01 | At3g09970     | expressed protein; protein id: At3g09970.1                                                     | 0.069 NA  |           | -0.024   | -0.07  |
| A010027_01 | not annotated | Chr3 C/2911995-2912064                                                                         | -0.086    | 0.19 NA   |          | -0.061 |
| A010028_01 | At3g07560     | unknown protein; protein id: At3g07560.1                                                       | -0.967    | -0.654    | -0.39    | -0.589 |
| A010033_01 | At3g01280     | putative porin; protein id: At3g01280.1                                                        | 0.411     | 0.388     | 0.49     | 0.664  |
| A010040_01 | At3g06250     | expressed protein; protein id: At3g06250.1                                                     | -0.017    | 0.169 NA  |          | 0.46   |
| A010042_01 | At3g47610     | putative protein; protein id: At3g47610.1                                                      | 0.172     | -0.149 NA |          | -0.197 |
| A010044_01 | At3g56650     | thylakoid luminal 20 kDa protein; protein id: At3g56650                                        | 0.172     | 0.148     | -0.136   | -0.237 |
| A010047_01 | At3g06200     | putative guanylate kinase; protein id: At3g06200.1                                             | -0.238 NA | NA        | NA       |        |
| A010048_01 | At3g56620     | nodulin-like protein; protein id: At3g56620.1                                                  | -0.022    | 0.054 NA  |          | 0.898  |
| A010049_01 | At3g16990     | seed maturation protein, putative; protein id: At3g16990                                       | -0.767    | -0.867 NA |          | -0.45  |
| A010051_01 | At3g62110     | polygalacturonase, putative; protein id: At3g62110.1                                           | 1.29      | 1.352     | 1.214    | 1.584  |
| A010059_01 | At3g15095     | unknown protein; protein id: At3g15095.1                                                       | -0.192    | -0.012    | 0.657    | 0.822  |
| A010061_01 | At3g55400     | methionyl-tRNA synthetase (AtcpMetRS); protein id: At3g55400                                   | 0.616     | 0.606     | 0.14     | 0.611  |
| A010065_01 | At3g14610     | cytochrome P450, putative; protein id: At3g14610.1                                             | -0.457 NA | NA        |          | -0.025 |
| A010066_01 | At3g23820     | NAD dependent epimerase, putative; protein id: At3g23820                                       |           | -0.393    | -0.386   | -0.43  |
| A010068_01 | At3g06110     | putative dual-specificity protein phosphatase; protein id: At3g06110                           | -0.382    | -0.207    | -0.201   | -0.323 |
| A010172_01 | At3g48030     | putative protein; protein id: At3g48030.1                                                      | 0.258     | 0.383     | 0.305    | -0.214 |
| A010173_01 | At3g56010     | putative protein; protein id: At3g56010.1                                                      | -0.453    | -0.597    | -0.633   | -1.059 |
| A010174_01 | At3g55330     | oxygen-evolving complex 25.6 kD protein, chloroplast; protein id: At3g55330                    | 0.249     | 0.232     | -0.131   | -0.549 |
| A010190_01 | At3g55420     | putative protein; protein id: At3g55420.1                                                      | 0.509 NA  |           | 0.517    | 0.599  |
| A010219_01 | At3g16850     | polygalacturonase, putative; protein id: At3g16850.1                                           | -0.099 NA |           | -0.181   | -0.596 |
| A010227_01 | At3g12630     | expressed protein; protein id: At3g12630.1                                                     | -0.905    | -0.398    | -0.223   | -0.887 |
| A010255_01 | At3g50080     | F-box protein family, AtFBL16; protein id: At3g50080                                           | -0.291    | -0.221 NA |          | -0.064 |
| A010261_01 | At3g53950     | putative protein; protein id: At3g53950.1                                                      | -0.523    | -0.184    | 0.052    | -0.13  |
| A010262_01 | At3g53970     | putative protein; protein id: At3g53970.1                                                      | -0.517    | -0.083    | -0.37    | -0.621 |
| A010265_01 | At3g58730     | V-ATPase subunit D (vATPD); protein id: At3g58730                                              | -0.276    | -0.188    | -0.404   | -0.687 |
| A010270_01 | At3g53390     | putative protein; protein id: At3g53390.1                                                      | -0.355    | -0.23 NA  |          | -0.142 |
| A010272_01 | At3g50520     | putative protein; protein id: At3g50520.1                                                      | 0.286     | 0.162     | 0.363    | -0.029 |
| A010274_01 | At3g43300     | guanine nucleotide-exchange - like protein; protein id: At3g43300                              | 0.246 NA  | NA        |          | -0.155 |
| A010275_01 | At3g50600     | expressed protein; protein id: At3g50600.1                                                     | 0.178     | -0.01     | -0.026   | -0.075 |
| A010276_01 | At3g54500     | putative protein; protein id: At3g54500.1                                                      | -1.094    | -1.107    | -0.78    | -1.476 |
| A010282_01 | At3g19260     | longevity factor-like protein; protein id: At3g19260.1 NA                                      | NA        |           | -0.169   | -0.176 |
| A010294_01 | At3g59280     | putative protein; protein id: At3g59280.1                                                      | -0.362    | -0.06     | -0.106   | -0.351 |
| A010296_01 | At3g19400     | cysteine proteinase; protein id: At3g19400.1                                                   | 0.918     | 0.77      | 0.725    | 1.009  |
| A010300_01 | At3g47930     | L-galactono-1,4-lactone dehydrogenase - like protein; protein id: At3g47930                    | 1.213     | 1.088     | 0.478 NA | NA     |
| A010306_01 | At3g12090     | senescence-associated protein, putative; protein id: At3g12090                                 | NA        | NA        | NA       | NA     |
| A010307_01 | At3g26165     | pseudogene, cytochrome P450 At3g26165                                                          | -2.202    | -2.498    | -1.607   | -1.962 |
| A010308_01 | At3g12140     | unknown protein; protein id: At3g12140.1                                                       | -0.364 NA |           | -0.436   | 0.053  |
| A010310_01 | At3g47650     | putative protein; protein id: At3g47650.1                                                      | 0.176     | 0.013     | -0.13    | -0.258 |
| A010313_01 | At3g15351     | expressed protein; protein id: At3g15351.1                                                     | -1.003 NA |           | -0.16    | -0.551 |
| A010315_01 | At3g12790     | unknown protein; protein id: At3g12790.1                                                       | -0.701    | -1.166    | -0.23    | -0.539 |
| A010316_01 | At3g48170     | betaine aldehyde dehydrogenase-like protein; protein id: At3g48170                             | -0.528    | -0.519    | -0.559   | -0.469 |
| A010318_01 | At3g51730     | putative protein; protein id: At3g51730.1                                                      | -2.228    | -2.464    | -1.502   | -1.551 |
| A010320_01 | At3g12390     | nascent polypeptide associated complex alpha chain; protein id: At3g12390                      | 1.065     | 0.886     | 0.928    | 1.33   |
| A010323_01 | At3g52480     | putative protein; protein id: At3g52480.1                                                      | -2.11     | -1.792    | -0.786   | -1.401 |
| A010327_01 | At3g12490     | cysteine proteinase inhibitor, putative; protein id: At3g12490                                 | 0.041     | 0.052     | 0.169    | 0.143  |
| A010328_01 | At3g25740     | methionine aminopeptidase, putative; protein id: At3g25740                                     | -0.088    | -0.235 NA |          | -0.416 |

|            |           |                                                         |        |    |        |        |
|------------|-----------|---------------------------------------------------------|--------|----|--------|--------|
| A010329_01 | At3g17850 | protein kinase, putative; protein id: At3g17850.1       | 0.024  | NA | -0.095 | 0.06   |
| A010333_01 | At3g18035 | hypothetical protein; protein id: At3g18035.1           | -0.227 |    | -0.163 | -0.482 |
| A010343_01 | At3g44290 | putative protein; protein id: At3g44290.1               | NA     | NA | NA     | NA     |
| A010344_01 | At3g03100 | expressed protein; protein id: At3g03100.1              | 0.082  |    | 0.448  | 0.383  |
| A010345_01 | At3g43240 | putative protein; protein id: At3g43240.1               | 0.031  |    | 0.149  | -0.044 |
| A010348_01 | At3g52620 | hypothetical protein; protein id: At3g52620.1           | -0.721 |    | -0.536 | -1.637 |
| A010349_01 | At3g21610 | unknown protein; protein id: At3g21610.1                | -0.48  |    | -0.677 | -0.156 |
| A010354_01 | At3g21570 | hypothetical protein; protein id: At3g21570.1           | -0.719 | NA | NA     | NA     |
| A010359_01 | At3g07020 | UDP-glucose:sterol glucosyltransferase; protein id:     | -0.257 |    | -0.256 | NA     |
| A010362_01 | At3g02740 | putative aspartyl protease; protein id: At3g02740.1     | -0.335 | NA |        | -0.675 |
| A010363_01 | At3g11200 | putative nucleic acid binding protein; protein id: At3g | 0.106  |    | -0.093 | 0.168  |
| A010365_01 | At3g06700 | ribosomal protein L29, putative; protein id: At3g0670   | 0.583  |    | 0.509  | 0.795  |
| A010369_01 | At3g44890 | RP19 gene for chloroplast ribosomal protein CL9; p      | 1.069  |    | 0.794  | 0.614  |
| A010371_01 | At3g14010 | expressed protein; protein id: At3g14010.1              | -0.866 | NA | NA     | -0.511 |
| A010374_01 | At3g12480 | unknown protein; protein id: At3g12480.1                | NA     |    | -0.266 | 0.001  |
| A010377_01 | At3g12200 | protein kinase, putative; protein id: At3g12200.1       | 0.364  |    | -0.036 | -0.053 |
| A010378_01 | At3g12145 | pseudogene, polygalacturonase inhibitor                 | 1.753  |    | 1.472  | 0.967  |
| A010379_01 | At3g12300 | expressed protein; protein id: At3g12300.1              | -0.714 |    | -0.467 | -0.347 |
| A010383_01 | At3g45010 | carboxypeptidase precursor-like protein; protein id: .  | -2.372 |    | -2.591 | -1.018 |
| A010390_01 | At3g15770 | hypothetical protein; protein id: At3g15770.1           | -1.269 |    | -1.443 | -0.238 |
| A010393_01 | At3g54400 | nucleoid DNA-binding - like protein; protein id: At3g:  | 1.638  |    | 1.432  | 1.106  |
| A010395_01 | At3g10700 | galactokinase-like protein; protein id: At3g10700.1     | 0.59   |    | 0.638  | 0.278  |
| A010400_01 | At3g56310 | glycosyl hydrolase family 27 (alpha-galactosidase/r     | -1.014 |    | -1.305 | -0.879 |
| A010404_01 | At3g04980 | hypothetical protein, contains DnaJ motif: prokaryot    | 0.794  |    | 0.624  | 0.418  |
| A010411_01 | At3g11470 | unknown protein; protein id: At3g11470.1                | 0.558  |    | 0.513  | 0.153  |
| A010413_01 | At3g11590 | expressed protein; protein id: At3g11590.1              | 0.499  |    | 0.472  | NA     |
| A010414_01 | At3g01240 | hypothetical protein; protein id: At3g01240.1           | -0.28  |    | -0.756 | -1.209 |
| A010417_01 | At3g01180 | glycogen synthase, putative; protein id: At3g01180.     | -0.215 | NA |        | -0.304 |
| A010420_01 | At3g07570 | unknown protein; protein id: At3g07570.1                | 0.739  |    | 0.894  | 0.704  |
| A010425_01 | At3g07760 | auxin-regulated protein; protein id: At3g07760.2        | -0.781 |    | -0.431 | 0.173  |
| A010433_01 | At3g05090 | expressed protein; protein id: At3g05090.1              | -0.714 |    | -0.728 | NA     |
| A010434_01 | At3g05100 | hypothetical protein; protein id: At3g05100.1           | 0.126  |    | -0.038 | -0.07  |
| A010441_01 | At3g09000 | expressed protein; protein id: At3g09000.1              | 0.636  |    | 0.76   | NA     |
| A010443_01 | At3g19170 | metalloprotease, putative; protein id: At3g19170.1      | 0.497  |    | 0.09   | -0.824 |
| A010449_01 | At3g08920 | rhodanese-like domain protein; protein id: At3g0892     | 0.309  |    | 0.479  | 0.293  |
| A010451_01 | At3g17020 | expressed protein; protein id: At3g17020.1              | -0.453 |    | -0.665 | -0.603 |
| A010452_01 | At3g16830 | unknown protein; protein id: At3g16830.1                | -0.271 |    | -0.431 | -0.352 |
| A010456_01 | At3g24200 | flavin-dependent hydroxylase VisC-related; protein i    | 0.103  |    | -0.17  | 0.061  |
| A010457_01 | At3g24150 | hypothetical protein; protein id: At3g24150.1           | 0.216  | NA |        | 0.436  |
| A010458_01 | At3g03610 | expressed protein; protein id: At3g03610.1              | -0.215 |    | -0.277 | 0.087  |
| A010459_01 | At3g24120 | transfactor, putative; protein id: At3g24120.1          | -0.067 | NA |        | 0.076  |
| A010460_01 | At3g15590 | DNA-binding protein, putative; protein id: At3g15590    | 0.606  |    | 0.846  | 0.636  |
| A010461_01 | At3g01670 | expressed protein; protein id: At3g01670.1              | 0.335  |    | 0.24   | 0.427  |
| A010463_01 | At3g50920 | putative protein; protein id: At3g50920.1               | 0.273  |    | 0.46   | 0.772  |
| A010464_01 | At3g19900 | expressed protein; protein id: At3g19900.1              | -1.225 |    | -1.368 | -0.805 |
| A010466_01 | At3g01780 | unknown protein; protein id: At3g01780.1                | 0.32   |    | 0.186  | NA     |
| A010467_01 | At3g19790 | hypothetical protein; protein id: At3g19790.1           | 0.656  |    | 0.832  | 0.783  |
| A010469_01 | At3g33530 | unknown protein; protein id: At3g33530.1                | 0.017  |    | 0.312  | 0.456  |
| A010473_01 | At3g03420 | expressed protein; protein id: At3g03420.1              | 0.515  |    | 0.486  | 0.361  |
| A010480_01 | At3g01820 | putative adenylate kinase; protein id: At3g01820.1      | 0.084  | NA |        | NA     |
| A010481_01 | At3g01860 | hypothetical protein; protein id: At3g01860.1           | -0.57  |    | -0.724 | NA     |
| A010495_01 | At3g04700 | hypothetical protein; protein id: At3g04700.1           | -0.293 |    | -0.555 | -1.171 |
| A010498_01 | At3g04610 | KH domain protein; protein id: At3g04610.1              | -0.011 | NA |        | NA     |
| A010502_01 | At3g20500 | purple acid phosphatase, putative; protein id: At3g2    | -0.636 |    | -0.863 | -0.338 |
| A010504_01 | At3g50860 | putative clathrin coat assembly protein; protein id: A  | 0.053  | NA |        | NA     |
| A010506_01 | At3g54920 | pectate lyase - like protein; protein id: At3g54920.1   | 0.853  |    | 1.14   | 0.561  |
| A010508_01 | At3g18500 | hypothetical protein; protein id: At3g18500.1           | -0.208 |    | -0.443 | -0.687 |
| A010516_01 | At3g18430 | expressed protein; protein id: At3g18430.1              | -0.04  |    | -0.138 | 0.258  |
| A010517_01 | At3g06320 | putative 50S ribosomal protein L33; protein id: At3g    | 1.466  |    | 1.361  | 1.598  |
| A010518_01 | At3g50770 | calmodulin-like protein; protein id: At3g50770.1        | -1.499 |    | -2.007 | -0.905 |
| A010522_01 | At3g22660 | unknown protein; protein id: At3g22660.1                | 0.292  |    | 0.265  | NA     |
| A010526_01 | At3g55005 | expressed protein; protein id: At3g55005.1              | 0.77   |    | 0.622  | 0.571  |
| A010527_01 | At3g56170 | putative protein; protein id: At3g56170.1               | -1.802 |    | -2.347 | -1.252 |
| A010534_01 | At3g23600 | expressed protein; protein id: At3g23600.1              | -0.444 |    | -0.441 | -0.228 |
| A010535_01 | At3g23170 | expressed protein; protein id: At3g23170.1              | -0.974 |    | -0.354 | -0.845 |
| A010538_01 | At3g57230 | MADS-box protein; protein id: At3g57230.1               | -0.279 |    | -0.674 | NA     |
| A010541_01 | At3g17070 | peroxidase, putative; protein id: At3g17070.1           | 0.308  |    | 0.623  | 0.434  |
| A010544_01 | At3g04470 | expressed protein; protein id: At3g04470.1              | 0.547  |    | 0.216  | -0.015 |

|            |           |                                                          |           |           |        |        |
|------------|-----------|----------------------------------------------------------|-----------|-----------|--------|--------|
| A010548_01 | xxxx      | b/t glycosyl transferase, putative; protein id: At3g25   | 0.886     | 0.756     | 0.581  | 0.754  |
| A010549_01 | At3g07180 | unknown protein; protein id: At3g07180.1                 | 0.494 NA  | NA        |        | 0.392  |
| A010555_01 | At3g03470 | cytochrome p450, putative; protein id: At3g03470.1       | -3.117    | -3.128    | -2.268 | -2.666 |
| A010557_01 | At3g02870 | putative myo-inositol monophosphatase; protein id:       | 0.675     | 0.332     | 0.391  | 0.501  |
| A010559_01 | At3g56490 | protein kinase C inhibitor-like protein; protein id: At3 | 0.52      | 0.578     | 0.744  | 1.231  |
| A010563_01 | At3g18810 | protein kinase, putative; protein id: At3g18810.1        | -0.314    | -0.106 NA |        | NA     |
| A010564_01 | At3g18830 | sugar transport, putative; protein id: At3g18830.1       | -0.759    | -0.77     | -0.231 | -0.564 |
| A010568_01 | At3g46010 | actin depolymerizing factor 1 (ADF1); protein id: At3    | -0.356    | -0.149    | -0.202 | -0.376 |
| A010571_01 | At3g05810 | expressed protein; protein id: At3g05810.1               | 0.714     | 0.741     | 0.529  | 0.314  |
| A010573_01 | At3g47990 | putative protein; protein id: At3g47990.1                | -0.293    | -0.059 NA |        | -0.052 |
| A010578_01 | At3g29575 | hypothetical protein; protein id: At3g29575.1            | -0.523    | -0.076    | 0.269  | -0.278 |
| A010579_01 | At3g54880 | putative protein; protein id: At3g54880.1                | -0.604    | -0.69     | -0.619 | -0.674 |
| A010582_01 | At3g09610 | unknown protein; protein id: At3g09610.1                 | -0.731    | -0.762 NA |        | 0.157  |
| A010591_01 | At3g44190 | putative protein; protein id: At3g44190.1                | NA        | NA        | -0.045 | -0.193 |
| A010592_01 | At3g11950 | hypothetical protein; protein id: At3g11950.1            | 0.122     | -0.082    | -0.207 | -0.537 |
| A010593_01 | At3g27430 | 20S proteasome beta subunit B (PBB1); protein id:        | 0.174     | 0.565     | 0.48   | 0.906  |
| A010595_01 | At3g14290 | 20S proteasome alpha subunit E2 (PAE2); protein id:      | 0.541     | 0.204     | 0.245  | 0.632  |
| A010599_01 | At3g02080 | putative 40S ribosomal protein S19; protein id: At3g     | 0.426     | 0.349     | 0.548  | 0.404  |
| A010601_01 | At3g63120 | putative protein; protein id: At3g63120.1                | -0.225    | 0.149 NA  |        | 0.214  |
| A010602_01 | At3g15020 | mitochondrial NAD-dependent malate dehydrogenase         | 0.586     | 0.764     | 0.629  | 0.444  |
| A010603_01 | At3g15040 | expressed protein; protein id: At3g15040.1               | NA        | NA        | NA     | -0.454 |
| A010604_01 | At3g02070 | unknown protein; protein id: At3g02070.1                 | -0.389 NA | NA        |        | -0.713 |
| A010605_01 | At3g09700 | expressed protein; protein id: At3g09700.1               | 0.514     | 0.528     | 0.723  | 0.79   |
| A010606_01 | At3g25585 | hypothetical protein; protein id: At3g25585.1            | -0.535    | -0.776    | -0.471 | 0.001  |
| A010607_01 | At3g23700 | expressed protein; protein id: At3g23700.1               | -0.208    | -0.624    | -0.793 | -0.373 |
| A010608_01 | At3g03050 | putative cellulose synthase catalytic subunit; protein   | 0.263     | 0.475     | 0.269  | 0.139  |
| A010611_01 | At3g09560 | unknown protein; protein id: At3g09560.1                 | -0.25 NA  | NA        |        | NA     |
| A010612_01 | At3g26090 | unknown protein; protein id: At3g26090.1                 | -0.629    | -0.621 NA |        | -0.185 |
| A010615_01 | At3g06580 | galactose kinase; protein id: At3g06580.1                | -0.105    | -0.291    | -0.221 | -0.174 |
| A010616_01 | At3g27850 | 50S ribosomal protein L12-C; protein id: At3g27850       | 0.241     | 0.111     | -0.011 | -0.186 |
| A010617_01 | At3g05160 | putative sugar transporter; protein id: At3g05160.1      | -1.581    | -1.565    | -1.679 | -1.791 |
| A010619_01 | At3g26510 | unknown protein; protein id: At3g26510.1                 | -2.952    | -2.625    | -1.301 | -1.962 |
| A010624_01 | At3g14230 | AP2 domain protein RAP2.2; protein id: At3g14230.        | -0.41     | -0.523    | -0.74  | -0.761 |
| A010625_01 | At3g01910 | putative sulfite oxidase; protein id: At3g01910.1        | -0.069    | -0.188    | -0.193 | -0.293 |
| A010626_01 | At3g18280 | lipid transfer protein, putative; protein id: At3g18280  | 0.473     | 0.838     | 0.484  | 0.168  |
| A010628_01 | At3g62840 | small nuclear ribonucleoprotein-like protein; protein    | 0.703     | 0.745     | 0.551  | 0.373  |
| A010629_01 | At3g23990 | mitochondrial chaperonin hsp60; protein id: At3g239      | 0.86      | 0.845     | 0.756  | 0.986  |
| A010632_01 | At3g09450 | hypothetical protein; protein id: At3g09450.1            | -2.364 NA | NA        |        | NA     |
| A010633_01 | At3g22104 | hypothetical protein; protein id: At3g22104.1            | -0.287 NA | NA        |        | 0.379  |
| A010634_01 | At3g11400 | eukaryotic translation initiation factor 3 subunit g (el | 0.333     | 0.447     | 0.476  | 0.509  |
| A010636_01 | At3g26360 | hypothetical protein; protein id: At3g26360.1            | 0.565     | 0.558     | 0.427  | 0      |
| A010637_01 | At3g47640 | hypothetical protein; protein id: At3g47640.1            | -0.111    | -0.176 NA |        | -0.064 |
| A010638_01 | At3g03020 | expressed protein; protein id: At3g03020.1               | 0.22      | 0.154     | 0.388  | 0.205  |
| A010643_01 | At3g12050 | expressed protein; protein id: At3g12050.1               | 0.365     | 0.132     | 0.413  | 0.459  |
| A010645_01 | At3g62940 | putative protein; protein id: At3g62940.1                | 0.173     | 0.293 NA  |        | 0.765  |
| A010647_01 | At3g63250 | homocysteine S-methyltransferase AtHMT-2; protei         | 0.262     | 0.301     | 0.436  | 0.551  |
| A010648_01 | At3g22890 | ATP sulfurylase, putative; protein id: At3g22890.1       | -1.717    | -1.664    | -1.222 | -1.102 |
| A010650_01 | At3g22380 | expressed protein; protein id: At3g22380.1               | -0.927    | -0.913    | -0.206 | -0.574 |
| A010652_01 | At3g12030 | expressed protein; protein id: At3g12030.1               | 0.115     | 0.245     | 0.186  | -0.204 |
| A010656_01 | At3g18410 | expressed protein; protein id: At3g18410.1               | 0.658     | 0.685     | 0.277  | 0.41   |
| A010658_01 | At3g55610 | delta-1-pyrroline-5-carboxylate synthetase; protein id:  | -1.146    | -1.343    | -1.278 | -1.282 |
| A010659_01 | At3g55260 | glycosyl hydrolase family 20; protein id: At3g55260.     | 0.245     | 0.23      | -0.041 | -0.163 |
| A010660_01 | At3g20670 | histone H2A, putative; protein id: At3g20670.1           | 1.554     | 1.182     | 0.972  | 0.717  |
| A010663_01 | At3g09735 | expressed protein; protein id: At3g09735.1               | 0.042     | 0.175     | 0.068  | 0.05   |
| A010666_01 | At3g30180 | cytochrome p450, putative; protein id: At3g30180.1       | -0.603    | -0.725    | 0.226  | 0.696  |
| A010669_01 | At3g19550 | expressed protein; protein id: At3g19550.1               | -1.73     | -1.792    | -0.845 | -1.424 |
| A010676_01 | At3g57450 | putative protein; protein id: At3g57450.1                | -0.498    | 0.119     | -0.387 | -0.837 |
| A010677_01 | At3g01100 | unknown protein; protein id: At3g01100.1                 | -1.101    | -1.052    | -0.916 | -0.996 |
| A010678_01 | At3g21220 | MAP kinase kinase 5; protein id: At3g21220.1             | 0.087 NA  |           | 0.248  | -0.149 |
| A010679_01 | At3g57560 | acetylglutamate kinase-like protein; protein id: At3g:   | 1.152     | 0.999     | 0.568  | 0.836  |
| A010681_01 | At3g27050 | expressed protein; protein id: At3g27050.1               | -0.278    | -0.219    | -0.358 | -0.382 |
| A010689_01 | At3g49670 | leucine-rich repeat transmembrane protein kinase, p      | 1.188     | 1.07      | 0.633  | 0.937  |
| A010690_01 | At3g04240 | putative O-linked GlcNAc transferase; protein id: At:    | -0.936    | -0.654    | -0.772 | -0.393 |
| A010693_01 | At3g44880 | lethal leaf-spot 1 homolog Lls1; protein id: At3g4488    | -1.163    | -1.169    | -0.809 | -0.879 |
| A010696_01 | At3g04520 | L-allo-threonine aldolase, putative; protein id: At3g0   | -0.792    | -1.008    | -0.222 | -0.804 |
| A010698_01 | At3g51980 | hypothetical protein; protein id: At3g51980.1            | 0.361     | 0.354     | 0.745  | 0.963  |
| A010699_01 | At3g57470 | protease-like protein; protein id: At3g57470.1           | 0.223     | 0.254     | 0.114  | 1.169  |
| A010701_01 | At3g16040 | expressed protein; protein id: At3g16040.1               | -0.963    | -0.172 NA |        | NA     |

|            |           |                                                        |           |           |        |        |
|------------|-----------|--------------------------------------------------------|-----------|-----------|--------|--------|
| A010704_01 | At3g04350 | expressed protein; protein id: At3g04350.1             | -0.756    | -0.872    | -0.908 | -1.222 |
| A010706_01 | At3g46290 | receptor protein kinase -like; protein id: At3g46290.1 | 0.044 NA  | NA        |        | -0.105 |
| A010708_01 | At3g57800 | putative protein; protein id: At3g57800.1              | 0.439     | 0.541     | 0.472  | 0.557  |
| A010709_01 | At3g56120 | putative protein; protein id: At3g56120.1              | 0.811     | 0.497     | 0.559  | 1.155  |
| A010710_01 | At3g56110 | putative protein; protein id: At3g56110.1              | -0.123    | 0.12      | 0.14   | -0.111 |
| A010713_01 | At3g24800 | E3 ubiquitin ligase, PRT1; protein id: At3g24800.1     | 0.136 NA  |           | 0.213  | 0.4    |
| A010715_01 | At3g58010 | putative protein; protein id: At3g58010.1              | -0.134    | 0.018     | -0.225 | -0.16  |
| A010720_01 | At3g13225 | hypothetical protein; protein id: At3g13225.1          | -0.234    | -0.343 NA |        | NA     |
| A010724_01 | At3g06590 | bHLH protein; protein id: At3g06590.1                  | -0.796    | -0.789    | 0.221  | -0.169 |
| A010725_01 | At3g28730 | recombination signal sequence recognition protein,     | 0.093     | -0.007    | 0.023  | 0.125  |
| A010727_01 | At3g02260 | unknown protein; protein id: At3g02260.1               | -0.205    | -0.536    | 0.196  | 0.036  |
| A010729_01 | At3g08930 | expressed protein; protein id: At3g08930.1             | 0.299     | 0.323     | -0.014 | 0.26   |
| A010731_01 | At3g27690 | light harvesting chlorophyll A/B binding protein, puta | 0.056 NA  |           | -0.058 | -0.133 |
| A010732_01 | At3g46060 | GTP-binding protein ara-3; protein id: At3g46060.1     | -0.147    | -0.064    | -0.165 | -0.199 |
| A010733_01 | At3g27740 | carbamoyl phosphate synthetase small subunit; pro      | 0.862     | 0.744     | 1.114  | 2.026  |
| A010734_01 | At3g27770 | expressed protein; protein id: At3g27770.1             | -0.658    | -1.089    | -0.935 | -0.892 |
| A010737_01 | At3g60030 | squamosa promoter binding protein-like 12; protein     | -0.637    | -0.672    | -0.285 | 0.226  |
| A010739_01 | At3g01500 | carbonic anhydrase, chloroplast precursor; protein i   | 0.363     | 0.386     | -1.038 | -1.535 |
| A010744_01 | At3g62360 | putative protein; protein id: At3g62360.1              | 0.476     | 0.92 NA   |        | 0.512  |
| A010745_01 | At3g23540 | unknown protein; protein id: At3g23540.1               | -0.689 NA | NA        |        | -0.233 |
| A010749_01 | At3g08760 | putative protein kinase; protein id: At3g08760.1       | -0.661    | -0.334    | -0.244 | -0.842 |
| A010750_01 | At3g49220 | pectinesterase - like protein; protein id: At3g49220.1 | 0.999     | 0.983     | 0.921  | 1.448  |
| A010751_01 | At3g52155 | expressed protein; protein id: At3g52155.1             | 0.262     | 0.464     | 0.009  | -0.327 |
| A010756_01 | At3g13226 | expressed protein; protein id: At3g13226.1             | 0.443 NA  |           | 0.366  | 0.669  |
| A010758_01 | At3g27160 | expressed protein; protein id: At3g27160.1             | 0.807     | 0.872     | 0.159  | -0.205 |
| A010759_01 | At3g10760 | unknown protein; protein id: At3g10760.1               | -0.284 NA | NA        |        | 0.821  |
| A010772_01 | At3g56510 | putative protein; protein id: At3g56510.1              | -0.197    | -0.025 NA |        | 0.314  |
| A010775_01 | At3g20890 | b/t tRNA-Ser; protein id: At3g20890 and tRNA-Ser;      | 0.179     | 0.147 NA  |        | -0.007 |
| A010776_01 | At3g07910 | expressed protein; protein id: At3g07910.1             | 0.144     | 0.414     | 0.37   | 0.027  |
| A010781_01 | At3g47833 | expressed protein; protein id: At3g47833.1             | 0.147     | 0.177     | 0.399  | -0.352 |
| A010790_01 | At3g10520 | class 2 non-symbiotic hemoglobin; protein id: At3g1    | -0.907    | -0.882    | -0.783 | -1.177 |
| A010803_01 | At3g16200 | unknown protein; protein id: At3g16200.1               | 0.358     | 0.793 NA  |        | 0.355  |
| A010804_01 | At3g56400 | WRKY family transcription factor; protein id: At3g56   | -1.258    | -0.848    | -0.312 | 0.114  |
| A010805_01 | At3g03870 | expressed protein; protein id: At3g03870.1             | -2.06 NA  |           | -1.13  | -1.994 |
| A010815_01 | At3g15900 | expressed protein; protein id: At3g15900.1             | -1.056    | -0.643    | -0.149 | -0.914 |
| A010819_01 | At3g15940 | hypothetical protein; protein id: At3g15940.1          | 0.916     | 0.65 NA   |        | 1.3    |
| A010822_01 | At3g13810 | zinc finger protein, putative; protein id: At3g13810.1 | -0.465    | -0.715 NA |        | -0.829 |
| A010834_01 | At3g27080 | TOM20, putative; protein id: At3g27080.1               | 0.606     | 0.537     | 0.44   | -0.028 |
| A010837_01 | At3g14110 | expressed protein; protein id: At3g14110.1             | 0.606     | 0.739     | 0.351  | 0.322  |
| A010846_01 | At3g13480 | hypothetical protein; protein id: At3g13480.1          | -0.457    | -0.415    | -0.22  | -0.099 |
| A010851_01 | At3g09920 | putative phosphatidylinositol-4-phosphate 5-kinase;    | -0.81     | -0.79     | -0.851 | -0.693 |
| A010863_01 | At3g21420 | expressed protein; protein id: At3g21420.1             | -0.906 NA |           | -0.268 | -0.232 |
| A010869_01 | At3g09210 | expressed protein; protein id: At3g09210.1             | 0.467     | 0.364     | 0.104  | 0.587  |
| A010874_01 | At3g10525 | expressed protein; protein id: At3g10525.1             | -1.569    | -1.751    | -0.792 | -2.019 |
| A010875_01 | At3g27260 | unknown protein; protein id: At3g27260.1               | -0.305    | -0.936    | -0.633 | -0.409 |
| A010876_01 | At3g27310 | expressed protein; protein id: At3g27310.1             | 0.232     | -0.171    | 0.134  | 0.249  |
| A010877_01 | At3g50630 | Kip-related protein 2; protein id: At3g50630.1         | 0.407     | 0.048     | 0.671  | 0.305  |
| A010879_01 | At3g58660 | putative protein; protein id: At3g58660.1              | 1.003     | 0.895 NA  |        | 0.971  |
| A010881_01 | At3g09850 | expressed protein; protein id: At3g09850.1             | -0.609    | -1.139    | -1.001 | -0.88  |
| A010885_01 | At3g51050 | putative protein; protein id: At3g51050.1              | 0.038 NA  |           | -0.281 | -0.103 |
| A010887_01 | At3g51100 | putative protein; protein id: At3g51100.1              | -0.05     | -0.092 NA |        | -0.465 |
| A010892_01 | At3g05520 | alpha subunit of F-actin capping protein; protein id:  | 0.443     | 0.208     | 0.242  | 0.5    |
| A010893_01 | At3g15290 | putative 3-hydroxybutyryl-CoA dehydrogenase; prot      | -0.051    | -0.066    | 0.085  | -0.108 |
| A010898_01 | At3g53620 | inorganic pyrophosphatase -like protein; protein id:   | 0.061     | 0.213 NA  |        | 0.466  |
| A010902_01 | At3g57330 | potential calcium-transporting ATPase 11, plasma m     | -1.238    | -1.074    | -0.745 | -1.492 |
| A010909_01 | At3g11730 | putative GTP-binding protein (ATFP8); protein id: At   | 0.52      | 0.472     | 0.444  | 0.623  |
| A010911_01 | At3g47800 | aldose 1-epimerase - like protein; protein id: At3g47  | -0.281    | -0.233    | -0.2   | -0.484 |
| A010912_01 | At3g06750 | expressed protein; protein id: At3g06750.1             | 0.014     | 0.317     | 0.436  | -0.32  |
| A010915_01 | At3g61530 | 3-methyl-2-oxobutanoate hydroxy-methyl-transferas      | -0.145    | -0.124    | -0.194 | -0.091 |
| A010916_01 | At3g24530 | rubisco expression protein, putative; protein id: At3g | 0.212     | -0.241    | -0.192 | -0.053 |
| A010926_01 | At3g61310 | putative DNA-binding protein; protein id: At3g61310    | 0.77      | 0.763     | 0.552  | 1.018  |
| A010929_01 | At3g15070 | RING zinc finger protein, putative; protein id: At3g15 | -0.555 NA | NA        | NA     | NA     |
| A010934_01 | At3g56750 | putative protein; protein id: At3g56750.1              | 0.452     | 0.342     | 0.229  | 0.496  |
| A010935_01 | At3g22422 | expressed protein; protein id: At3g22422.1             | 0.054     | 0.112     | 0.074  | 0.405  |
| A010938_01 | At3g56860 | RRM-containing RNA-binding protein; protein id: At     | -0.294    | -0.314    | -0.364 | 0.16   |
| A010941_01 | At3g52860 | putative protein; protein id: At3g52860.1              | 0.162     | 0.386     | 0.379  | -0.033 |
| A010942_01 | At3g54840 | Rab family GTP-binding protein (Ara6); protein id: A   | -0.517    | -0.747    | -0.116 | 0.071  |
| A010943_01 | At3g52960 | peroxiredoxin - like protein; protein id: At3g52960.1  | 0.796     | 0.955     | 0.683  | 0.595  |

|            |           |                                                         |        |        |        |        |
|------------|-----------|---------------------------------------------------------|--------|--------|--------|--------|
| A010947_01 | At3g17670 | hypothetical protein; protein id: At3g17670.1           | -0.05  | NA     | -0.169 | -0.369 |
| A010948_01 | At3g11770 | unknown protein; protein id: At3g11770.1                | 0.343  | NA     | 0.697  | 0.574  |
| A010949_01 | At3g61900 | putative protein; protein id: At3g61900.1               | -2.018 | NA     | NA     | NA     |
| A010951_01 | At3g17740 | hypothetical protein; protein id: At3g17740.1           | -0.088 | NA     | NA     | NA     |
| A010955_01 | At3g62700 | glutathione-conjugate transporter, putative; protein i  | -0.88  | -0.639 | 0.287  | 0.488  |
| A010958_01 | At3g58990 | 3-isopropylmalate dehydratase-like protein (small su NA | NA     | NA     | NA     | NA     |
| A010960_01 | At3g59040 | putative protein; protein id: At3g59040.1               | 0.629  | 0.18   | -0.273 | 0.308  |
| A010961_01 | At3g59140 | ABC transporter family protein; protein id: At3g5914    | -1.205 | -1.177 | NA     | -0.205 |
| A010963_01 | At3g56190 | alpha-soluble NSF attachment protein; protein id: A     | -0.357 | -0.184 | -0.171 | -0.318 |
| A010964_01 | At3g56290 | putative protein; protein id: At3g56290.1               | -1.503 | -1.709 | -0.78  | -1.891 |
| A010973_01 | At3g55850 | putative protein; protein id: At3g55850.1               | 0.542  | 0.384  | NA     | 0.912  |
| A010976_01 | At3g60340 | palmitoyl-protein thioesterase precursor - like; prote  | -0.279 | -0.361 | -0.211 | -0.369 |
| A010980_01 | At3g56630 | cytochrome P450, putative; protein id: At3g56630.1 NA   | NA     | NA     | -0.998 | NA     |
| A010995_01 | At3g44070 | putative protein; protein id: At3g44070.1               | -0.176 | -0.152 | NA     | NA     |
| A010996_01 | At3g44100 | putative protein; protein id: At3g44100.1               | -0.235 | 0.121  | 0.131  | -0.532 |
| A011002_01 | At3g26710 | expressed protein; protein id: At3g26710.1              | 0.44   | 0.426  | -0.308 | -0.284 |
| A011007_01 | At3g11930 | ethylene-responsive protein, putative; protein id: At   | -2.702 | -2.627 | -1.522 | -2.456 |
| A011019_01 | At3g20530 | protein kinase, putative; protein id: At3g20530.1       | -0.186 | -0.527 | NA     | -1.529 |
| A011021_01 | At3g25840 | protein kinase, putative; protein id: At3g25840.1       | -0.337 | -0.344 | -0.316 | -0.293 |
| A011029_01 | At3g19895 | unknown protein; protein id: At3g19895.1                | -1.109 | -0.99  | NA     | -0.986 |
| A011033_01 | At3g15580 | AtAPG8i; expressed protein; protein id: At3g15580.      | -0.981 | -1.195 | -0.782 | -1.437 |
| A011038_01 | At3g22530 | expressed protein; protein id: At3g22530.1              | -0.756 | -0.717 | 0.004  | -0.685 |
| A011039_01 | At3g22590 | unknown protein; protein id: At3g22590.1                | 0.173  | 0.102  | 0.144  | 0.652  |
| A011040_01 | At3g26600 | unknown protein; protein id: At3g26600.1                | -0.437 | NA     | NA     | -0.208 |
| A011046_01 | At3g15790 | unknown protein; protein id: At3g15790.1                | 0.506  | 0.445  | 0.422  | 0.368  |
| A011048_01 | At3g15820 | expressed protein; protein id: At3g15820.1 NA           | NA     | NA     | -0.142 | -0.615 |
| A011054_01 | At3g12650 | expressed protein; protein id: At3g12650.1              | 0.265  | 0.286  | 0.274  | 0.323  |
| A011055_01 | At3g12670 | CTP-synthetase, putative; protein id: At3g12670.1       | 0.452  | 0.56   | 0.593  | 1.1    |
| A011064_01 | At3g19490 | expressed protein; protein id: At3g19490.1              | 0.433  | 0.327  | -0.009 | 0.329  |
| A011068_01 | At3g29760 | unknown protein; protein id: At3g29760.1                | 0.033  | -0.28  | -0.302 | 0.047  |
| A011077_01 | At3g17365 | expressed protein; protein id: At3g17365.1              | -0.106 | NA     | NA     | 0.17   |
| A011078_01 | At3g17390 | putative s-adenosylmethionine synthetase; protein i     | 0.87   | 0.56   | 0.59   | 1.045  |
| A011085_01 | At3g14840 | receptor-like serine/threonine kinase, putative; prote  | 0.756  | 0.573  | -0.026 | -0.014 |
| A011089_01 | At3g27350 | expressed protein; protein id: At3g27350.1              | -0.382 | -0.516 | -0.035 | -0.215 |
| A011090_01 | At3g27390 | unknown protein; protein id: At3g27390.1                | -0.805 | NA     | -0.819 | -1.095 |
| A011094_01 | At3g21790 | putative UDP-glucose glucosyltransferase; protein i     | -1.695 | NA     | -1.072 | -1.906 |
| A011096_01 | At3g24890 | synaptobrevin, putative; protein id: At3g24890.1        | 0.107  | NA     | 0.286  | NA     |
| A011104_01 | At3g46550 | fasciclin-like arabinogalactan-protein, putative (FLA   | 0.521  | 0.774  | 0.574  | 0.061  |
| A011108_01 | At3g19990 | hypothetical protein; protein id: At3g19990.1           | -0.333 | -0.325 | -0.272 | -0.775 |
| A011109_01 | At3g28750 | unknown protein; protein id: At3g28750.1                | -0.457 | -0.949 | -1.149 | -1.426 |
| A011114_01 | At3g46610 | hypothetical protein; protein id: At3g46610.1           | -0.523 | -0.427 | NA     | -0.509 |
| A011121_01 | At3g48500 | hypothetical protein; protein id: At3g48500.1           | 0.738  | 0.633  | 0.19   | 0.635  |
| A011124_01 | At3g18060 | putative WD-repeat protein (WDR1-like); protein id: NA  | NA     | NA     | -0.331 | -0.398 |
| A011130_01 | At3g14280 | unknown protein; protein id: At3g14280.1                | -3.289 | -3.028 | -1.556 | -2.917 |
| A011132_01 | At3g53610 | ras-related GTP-binding protein, putative; protein id   | 0.155  | 0.104  | 0.366  | 0.373  |
| A011133_01 | At3g14310 | putative pectin methylesterase; protein id: At3g1431    | 0.307  | 0.476  | 0.065  | -0.001 |
| A011142_01 | At3g16230 | unknown protein; protein id: At3g16230.1                | 0.083  | -0.159 | -0.093 | -0.061 |
| A011146_01 | At3g49570 | hypothetical protein; protein id: At3g49570.1           | -2.623 | -3.212 | -2.06  | NA     |
| A011148_01 | At3g04770 | putative 40S ribosomal protein; protein id: At3g0477    | 0.706  | 1.022  | 0.867  | 1.109  |
| A011153_01 | At5g24280 | putative protein; protein id: At5g24280.1               | 0.213  | 0.2    | 0.423  | -0.041 |
| A011159_01 | At3g26950 | unknown protein; protein id: At3g26950.1                | 0.489  | 0.663  | 0.371  | 0.678  |
| A011163_01 | At3g54010 | peptidylprolyl isomerase (pasticcino 1); protein id: A  | 0.155  | NA     | 0.055  | 0.153  |
| A011164_01 | At3g02780 | isopentenyl diphosphate:dimethylallyl diphosphate i     | -0.15  | NA     | 0.035  | -0.298 |
| A011167_01 | At3g22990 | expressed protein; protein id: At3g22990.1              | 0.115  | -0.262 | 0.236  | 0.318  |
| A011171_01 | At3g23070 | hypothetical protein; protein id: At3g23070.1           | 0.126  | 0.008  | -0.099 | 0.202  |
| A011187_01 | At3g59690 | putative protein; protein id: At3g59690.1 NA            | NA     | NA     | NA     | NA     |
| A011189_01 | At3g55250 | putative protein; protein id: At3g55250.1               | -0.371 | NA     | -0.135 | -0.756 |
| A011190_01 | At3g55290 | oxidoreductase -like protein; protein id: At3g55290.1   | 0.038  | 0.106  | 0.078  | 0.356  |
| A011193_01 | At3g22060 | receptor kinase common family, putative; protein id:    | -1.905 | -1.481 | -1.468 | -2.199 |
| A011194_01 | At3g59980 | putative protein; protein id: At3g59980.1               | 0.737  | 0.73   | 0.411  | 0.163  |
| A011198_01 | At3g60140 | glycosyl hydrolase family 1, beta-glucosidase; prote    | -3.459 | NA     | -2.44  | -4.05  |
| A011199_01 | At3g60160 | ABC transporter family protein; protein id: At3g6016    | -0.177 | -0.489 | -0.027 | 0.029  |
| A011200_01 | At3g60180 | uridylyate kinase-like protein; protein id: At3g60180.1 | -0.661 | -1.147 | -0.405 | -1.006 |
| A011203_01 | At3g27190 | uracil phosphoribosyltransferase, putative; protein ic  | 0.265  | 0.386  | NA     | 0.382  |
| A011208_01 | At3g12920 | expressed protein; protein id: At3g12920.1              | -0.008 | -0.191 | NA     | 0.826  |
| A011223_01 | At3g27930 | expressed protein; protein id: At3g27930.1              | 0.398  | 0.384  | 0.43   | 0.564  |
| A011226_01 | At3g60410 | putative protein; protein id: At3g60410.1               | -0.075 | -0.279 | NA     | 0.133  |
| A011227_01 | At3g60420 | putative protein; protein id: At3g60420.1               | -1.628 | -1.575 | -0.599 | -0.93  |



|            |           |                                                         |           |           |        |        |
|------------|-----------|---------------------------------------------------------|-----------|-----------|--------|--------|
| A011228_01 | At3g60520 | putative protein; protein id: At3g60520.1               | 0.076     | 0.412     | 0.713  | 0.728  |
| A011231_01 | At3g43440 | putative protein; protein id: At3g43440.1               | -0.598    | -0.96 NA  |        | -0.482 |
| A011242_01 | At3g55070 | putative protein; protein id: At3g55070.1               | -0.46     | -0.603    | -0.103 | -0.052 |
| A011250_01 | At3g24490 | hypothetical protein; protein id: At3g24490.1           | 0.343     | -0.102    | -0.011 | -0.165 |
| A011263_01 | At3g42790 | nucleic acid binding protein-like; protein id: At3g427  | -0.054    | -0.29     | -0.068 | -0.134 |
| A011267_01 | At3g22420 | putative protein kinase; protein id: At3g22420.1        | 0.288     | 0.059     | 0.364  | 0.717  |
| A011270_01 | At3g17470 | hypothetical protein; protein id: At3g17470.1           | -0.239 NA | NA        | NA     |        |
| A011274_01 | At3g17590 | expressed protein; protein id: At3g17590.1              | 0.448     | 0.426     | 0.657  | 0.512  |
| A011285_01 | At3g53960 | transporter-like protein; protein id: At3g53960.1       | -1.972    | -1.831 NA | NA     |        |
| A011288_01 | At3g54030 | protein kinase -like protein; protein id: At3g54030.1   | 0.105 NA  | NA        |        | 0.576  |
| A011296_01 | At3g25890 | AP2 domain transcription factor, putative; protein id   | -0.375 NA |           | 0.068  | 0.503  |
| A011301_01 | At3g26080 | unknown protein; protein id: At3g26080.1                | -0.804    | -0.37     | -0.472 | -0.997 |
| A011304_01 | At3g21110 | phosphoribosyamidoimidazole-succinocarboxamide          | 0.706     | 0.807     | 0.544  | 1.038  |
| A011306_01 | At3g12280 | retinoblastoma protein; protein id: At3g12280.1         | 0.14 NA   | NA        |        | 0.211  |
| A011307_01 | At3g59210 | putative protein; protein id: At3g59210.1               | -1.658    | -1.481    | -0.793 | -0.103 |
| A011311_01 | At3g10230 | lycopene beta cyclase; protein id: At3g10230.1          | -0.879    | -0.917    | -0.645 | -0.654 |
| A011320_01 | At3g17150 | hypothetical protein; protein id: At3g17150.1           | 0.984     | 1.12      | 1.005  | 1.364  |
| A011322_01 | At3g11660 | VAMP protein SEC22; protein id: At3g11660.1             | NA        | NA        | -1.082 | -2.083 |
| A011323_01 | At3g15354 | similar to phytochrome A supressor spa1, putative;      | -0.772    | -0.683    | -0.171 | 0.428  |
| A011326_01 | At3g25120 | expressed protein; protein id: At3g25120.1              | 0.27      | 0.599     | 0.178  | 0.178  |
| A011331_01 | At3g48180 | hypothetical protein; protein id: At3g48180.1           | -0.261    | -0.235    | -0.079 | -1.334 |
| A011336_01 | At3g02360 | 6-phosphogluconate dehydrogenase, putative; prote       | 0.145     | -0.189    | -0.008 | 0.028  |
| A011338_01 | At3g02320 | putative N2,N2-dimethylguanosine tRNA methyltran        | -0.227 NA | NA        |        | 0.269  |
| A011339_01 | At3g02340 | RING zinc-finger protein, putative; protein id: At3g0   | -0.591    | -0.498    | -0.507 | -0.356 |
| A011341_01 | At3g52420 | outer envelope membrane protein-like protein; prote     | 0.152     | 0.344 NA  | NA     |        |
| A011342_01 | At3g05060 | putative SAR DNA-binding protein-1; protein id: At3     | 1.006     | 1.034     | 0.757  | 1.468  |
| A011343_01 | At3g55630 | tetrahydrofolylpolyglutamate synthase precursor - lii   | 0.114     | 0.164     | 0.33   | 0.343  |
| A011344_01 | At3g09820 | putative adenosine kinase; protein id: At3g09820.1      | 1.036     | 1.006     | 0.997  | 1.29   |
| A011349_01 | At3g29230 | hypothetical protein; protein id: At3g29230.1           | 0.378 NA  | NA        |        | 0.348  |
| A011356_01 | At3g25805 | expressed protein; protein id: At3g25805.1              | 0.301 NA  |           | 0.228  | 0.268  |
| A011359_01 | At3g57510 | polygalacturonase, putative; protein id: At3g57510.1    | -4.446    | -4.64     | -3.629 | -4.866 |
| A011361_01 | At3g08530 | clathrin heavy chain, putative; protein id: At3g08530   | -0.133    | -0.022    | -0.108 | 0.21   |
| A011372_01 | At3g52750 | plastid division protein FtsZ-like; protein id: At3g527 | 1.142     | 1.257 NA  |        | 1.072  |
| A011374_01 | At3g12360 | ankyrin-like protein; protein id: At3g12360.1           | -0.788    | -0.92     | -0.342 | -0.675 |
| A011382_01 | At3g12260 | expressed protein; protein id: At3g12260.1              | 0.443     | 0.311     | 0.407  | 0.178  |
| A011384_01 | At3g51650 | putative protein; protein id: At3g51650.1               | 0.119     | 0.081     | 0.135  | 0.202  |
| A011385_01 | At3g44950 | putative protein; protein id: At3g44950.1               | -0.138    | 0.119     | -0.019 | -0.227 |
| A011387_01 | At3g06570 | expressed protein; protein id: At3g06570.1              | -0.452 NA | NA        |        | -0.285 |
| A011390_01 | At3g06530 | hypothetical protein; protein id: At3g06530.1           | 0.744     | 0.749 NA  |        | 1.179  |
| A011395_01 | At3g08650 | unknown protein; protein id: At3g08650.1                | -0.809    | -0.226 NA |        | -0.491 |
| A011396_01 | At3g08740 | putative elongation factor P (EF-P); protein id: At3g   | 1.04      | 0.925     | 0.584  | 0.728  |
| A011397_01 | At3g08610 | expressed protein; protein id: At3g08610.1              | -0.043    | 0.164     | 0.266  | -0.157 |
| A011407_01 | At3g01230 | hypothetical protein; protein id: At3g01230.1           | -0.539    | -0.856    | -1.5   | -2.354 |
| A011414_01 | At3g07740 | expressed protein; protein id: At3g07740.1              | 0.022 NA  | NA        |        | -0.265 |
| A011416_01 | At3g07790 | hypothetical protein; protein id: At3g07790.1           | -0.447    | -0.735    | -0.654 | -0.508 |
| A011419_01 | At3g05180 | putative nodulin; protein id: At3g05180.1               | 0.744     | 0.741     | 0.719  | 1.436  |
| A011422_01 | At3g05290 | mitochondrial carrier protein family; protein id: At3g  | -0.116    | -0.179    | 0.011  | -0.043 |
| A011426_01 | At3g05350 | putative aminopeptidase; protein id: At3g05350.1        | 0.007 NA  |           | -0.802 | -0.516 |
| A011428_01 | At3g09030 | hypothetical protein; protein id: At3g09030.1           | -1.003 NA | NA        |        | -1.006 |
| A011429_01 | At3g20250 | pumilio-family RNA-binding protein, putative; proteir   | -1.676    | -1.544    | -0.66  | -0.646 |
| A011435_01 | At3g09180 | expressed protein; protein id: At3g09180.1              | -0.661 NA |           | -0.377 | -0.15  |
| A011436_01 | At3g09190 | MZB10.23; pseudogene, lectin GB:AAD56334                | -0.011    | 0.064     | 0.721  | 0.765  |
| A011441_01 | At3g10250 | expressed protein; protein id: At3g10250.1              | -1.451    | -1.206    | -0.57  | -0.575 |
| A011445_01 | At3g03560 | hypothetical protein; protein id: At3g03560.1           | -0.014    | -0.319    | -0.363 | 0.152  |
| A011446_01 | At3g03550 | expressed protein; protein id: At3g03550.1              | 0.093     | 0.387     | 0.498  | 1.088  |
| A011452_01 | At3g33520 | putative actin; protein id: At3g33520.1                 | -0.257    | -0.143    | 0.05   | 0.077  |
| A011455_01 | At3g10970 | expressed protein; protein id: At3g10970.1              | -0.717    | -0.85     | -0.333 | -0.251 |
| A011460_01 | At3g02300 | unknown protein; protein id: At3g02300.1                | NA        | -0.247    | -0.232 | -0.21  |
| A011461_01 | At3g04600 | putative tryptophanyl-tRNA synthetase; protein id: A    | 0.147     | 0.358     | 0.077  | 0.13   |
| A011462_01 | At3g04630 | expressed protein; protein id: At3g04630.1              | 0.629     | 0.746     | 0.667  | 1.077  |
| A011471_01 | At3g53110 | DEAD/DEAH box RNA helicase protein, putative; pr        | -0.31 NA  | NA        |        | 0.04   |
| A011472_01 | At3g10060 | FKBP-type peptidyl-prolyl cis-trans isomerase, puta     | -0.061    | -0.015    | -0.276 | -0.732 |
| A011474_01 | At3g30300 | auxin-independent growth promoter, putative; protei     | 0.47      | 0.563     | 0.177  | 0.79   |
| A011478_01 | At3g03950 | expressed protein; protein id: At3g03950.1              | -0.413 NA |           | -0.82  | -0.664 |
| A011479_01 | At3g03980 | putative short-chain type dehydrogenase/reductase       | 0.735     | 0.69      | 0.538  | 0.373  |
| A011480_01 | At3g17050 | unknown protein; protein id: At3g17050.1                | 0.173     | 0.128     | 0.34   | -0.038 |
| A011486_01 | At3g06310 | expressed protein; protein id: At3g06310.1              | 0.4       | 0.598     | 0.282  | -0.097 |
| A011487_01 | At3g06300 | expressed protein; protein id: At3g06300.1              | 0.307 NA  |           | -0.218 | -0.147 |

|            |           |                                                               |           |           |          |        |
|------------|-----------|---------------------------------------------------------------|-----------|-----------|----------|--------|
| A011489_01 | At3g24450 | expressed protein; protein id: At3g24450.1                    | -0.014    | 0.107     | 0.595    | 0.196  |
| A011491_01 | At3g24480 | disease resistance protein, putative; protein id: At3g24480.1 | 0.776     | 0.856 NA  | NA       |        |
| A011505_01 | At3g52840 | glycosyl hydrolase family 35 (beta-galactosidase); p          | -0.62     | -0.345    | -0.397   | -0.281 |
| A011508_01 | At3g03090 | hypothetical protein; protein id: At3g03090.1                 | 0.782     | 0.665     | 0.27     | 0.638  |
| A011510_01 | At3g03180 | unknown protein; protein id: At3g03180.1                      | -0.538    | -0.435    | -0.173   | -0.902 |
| A011511_01 | At3g05760 | expressed protein; protein id: At3g05760.1                    | 0.264     | 0.151     | 0.431    | 0.197  |
| A011512_01 | At3g57570 | hypothetical protein; protein id: At3g57570.1                 | -0.429    | -0.531 NA |          | -0.414 |
| A011521_01 | At3g02060 | DEAD/DEAH box helicase protein, putative; protein             | 0.516     | 0.34      | 0.094    | 0.463  |
| A011522_01 | At3g07300 | hypothetical protein; protein id: At3g07300.1                 | 0.316     | 0.043     | -0.063   | 0.048  |
| A011523_01 | At3g07200 | putative RING zinc finger protein; protein id: At3g07200.1    | 1.135     | 1.216     | 1.234    | 1.559  |
| A011526_01 | At3g09860 | unknown protein; protein id: At3g09860.1                      | 0.005     | 0.14      | -0.239   | -0.656 |
| A011532_01 | At3g49780 | putative protein; protein id: At3g49780.1                     | -2.845    | -2.768    | -2.202   | -3.759 |
| A011533_01 | At3g06980 | DEAD/DEAH box RNA helicase protein, putative; pr              | 0.503     | 0.221     | -0.636   | -0.317 |
| A011535_01 | At3g49800 | putative protein; protein id: At3g49800.1                     | -0.42     | -0.65     | -0.097   | -0.234 |
| A011536_01 | At3g49810 | putative protein; protein id: At3g49810.1                     | 0.341     | 0.062     | 0.094 NA |        |
| A011539_01 | At3g07030 | unknown protein; protein id: At3g07030.1                      | 0.181     | 0.297     | 0.175    | 0.061  |
| A011540_01 | At3g49850 | myb-like protein; protein id: At3g49850.1                     | -0.011    | 0.213     | 0.159    | 0.369  |
| A011541_01 | At3g07050 | putative GTPase; protein id: At3g07050.1                      | 0.298     | 0.336     | 0.634    | 0.812  |
| A011544_01 | At3g02910 | expressed protein; protein id: At3g02910.1                    | -0.655    | -0.692    | -0.009   | -0.155 |
| A011546_01 | At3g04310 | hypothetical protein; protein id: At3g04310.1                 | -0.36 NA  |           | -0.289   | -0.658 |
| A011548_01 | At3g04290 | putative GDSL-motif lipase/acylhydrolase; protein ic          | 2.461     | 1.681     | 1.538    | 2.491  |
| A011550_01 | At3g04140 | unknown protein; protein id: At3g04140.1                      | -1.632    | -1.799    | -0.845   | -1.119 |
| A011557_01 | At3g02660 | putative tyrosyl-tRNA synthetase; protein id: At3g02660.1     | 0.548     | 0.566     | 0.269    | 0.478  |
| A011566_01 | At3g57990 | putative protein; protein id: At3g57990.1                     | -0.284    | -0.395    | -0.17    | -0.442 |
| A011569_01 | At3g06130 | expressed protein; protein id: At3g06130.1                    | 0.623     | 0.343     | 0.628    | 0.606  |
| A011571_01 | At3g09670 | PWWP domain protein; protein id: At3g09670.1                  | 0.342     | 0.265 NA  |          | 0.828  |
| A011574_01 | At3g21750 | UDP-glycosyltransferase family; protein id: At3g21750.1       | -0.57     | -0.472    | -0.097   | -0.485 |
| A011575_01 | At3g47836 | expressed protein; protein id: At3g47836.1                    | 0.021     | 0.3       | 0.018    | -0.215 |
| A011576_01 | At3g51030 | thioredoxin h; protein id: At3g51030.1                        | -0.538    | -0.469    | -0.065   | -0.835 |
| A011584_01 | At3g08010 | expressed protein; protein id: At3g08010.1                    | -0.382    | -0.412    | -0.443   | -0.601 |
| A011585_01 | At3g08020 | unknown protein; protein id: At3g08020.1                      | -0.433    | -0.996 NA |          | -0.427 |
| A011589_01 | At3g06270 | protein phosphatase 2C (PP2C); protein id: At3g06270.1        | -0.352    | -0.35 NA  |          | -0.772 |
| A011592_01 | At3g11890 | expressed protein; protein id: At3g11890.1                    | -0.276 NA | NA        |          | -0.231 |
| A011593_01 | At3g48050 | putative protein; protein id: At3g48050.1                     | -0.727 NA |           | -0.899   | -0.719 |
| A011600_01 | At3g51260 | 20S proteasome alpha subunit D (PAD1); protein id             | 0.468     | 0.562     | 0.28     | 0.451  |
| A011601_01 | At3g20820 | disease resistance protein family (LRR); protein id: .        | 0.282     | 0.273     | 0.591    | 0.953  |
| A011604_01 | At3g60300 | putative protein; protein id: At3g60300.1                     | -0.24     | -0.47     | -0.112   | -0.235 |
| A011606_01 | At3g55120 | chalcone isomerase; protein id: At3g55120.1                   | 1.001     | 1.08      | 0.807    | 0.934  |
| A011607_01 | At3g52340 | expressed protein; protein id: At3g52340.1                    | -0.77     | -0.99     | -0.775   | -0.667 |
| A011610_01 | At3g23580 | ribonucleoside-diphosphate reductase small chain;             | -0.259    | -0.133    | 0.027    | 0.382  |
| A011611_01 | At3g27750 | unknown protein; protein id: At3g27750.1                      | 0.32      | 0.618     | 0.551    | 0.402  |
| A011613_01 | At3g23640 | glycosyl hydrolase family 31; protein id: At3g23640.1         | -0.636 NA |           | -1.175   | -1.258 |
| A011614_01 | At3g14240 | subtilisin-like serine protease; protein id: At3g14240.1      | 1.265     | -0.567    | 0.776    | 1.228  |
| A011619_01 | At3g13670 | casein kinase, putative; protein id: At3g13670.1              | 0.109     | -0.746    | -0.741   | -0.494 |
| A011622_01 | At3g21250 | ABC transporter family protein; protein id: At3g21250.1       | -1.172    | -1.336    | -0.93    | -0.979 |
| A011624_01 | At3g57070 | putative protein; protein id: At3g57070.1                     | NA        | NA        | -0.201   | -0.178 |
| A011625_01 | At3g02540 | putative RAD23; protein id: At3g02540.1                       | 0.021     | -0.038    | -0.093   | 0.035  |
| A011629_01 | At3g45240 | serine/threonine-protein kinase-like protein; protein         | -0.17     | -0.054    | 0.099    | 0.197  |
| A011630_01 | At3g05380 | unknown protein; protein id: At3g05380.1                      | -0.12     | -0.276 NA |          | 0.185  |
| A011631_01 | At3g61260 | putative DNA-binding protein; protein id: At3g61260.1         | -1.206    | -1.231    | -1.054   | -1.707 |
| A011634_01 | At3g54210 | ribosomal protein L17-like protein; protein id: At3g54210.1   | 0.759     | 0.534     | 0.422    | 0.247  |
| A011637_01 | At3g18860 | expressed protein; protein id: At3g18860.1                    | 0.153 NA  | NA        |          | -0.214 |
| A011650_01 | At3g09200 | putative 60S acidic ribosomal protein P0; protein id:         | 0.612     | 0.561     | 0.505    | 0.742  |
| A011652_01 | At3g13330 | hypothetical protein; protein id: At3g13330.1                 | -0.268    | -0.674 NA | NA       |        |
| A011653_01 | At3g20870 | expressed protein; protein id: At3g20870.1                    | 0.299     | 0.422     | 0.504    | 0.723  |
| A011654_01 | At3g10260 | expressed protein; protein id: At3g10260.1                    | -0.388    | -0.322    | 0.066    | -0.095 |
| A011655_01 | At3g18370 | expressed protein; protein id: At3g18370.1                    | -0.353    | -0.709 NA |          | -0.634 |
| A011658_01 | At3g17790 | acid phosphatase type 5; protein id: At3g17790.1              | -0.684    | -0.864    | -0.226   | 0.348  |
| A011661_01 | At3g53470 | putative protein; protein id: At3g53470.1                     | -0.547    | -0.377    | -0.131   | -0.478 |
| A011662_01 | At3g01980 | putative dehydrogenase; protein id: At3g01980.1               | 1.171     | 0.969     | 0.769    | 1.324  |
| A011663_01 | At3g03790 | unknown protein; protein id: At3g03790.1                      | 0.043     | -0.111    | 0.269    | 0.731  |
| A011665_01 | At3g07850 | exopolysaccharuronase; protein id: At3g07850.1                | -0.123    | -0.422    | -0.181   | -0.015 |
| A011666_01 | At3g13180 | sun protein (fmu protein), putative; protein id: At3g13180.1  | 0.936     | 0.986     | 0.714    | 1.113  |
| A011671_01 | At3g04400 | ribosomal protein L17, putative; protein id: At3g04400.1      | 0.445     | 0.726     | 0.797    | 1.333  |
| A011672_01 | At3g06670 | hypothetical protein; protein id: At3g06670.1                 | -0.003 NA | NA        |          | -0.799 |
| A011673_01 | At3g09440 | heat-shock protein (At-hsc70-3); protein id: At3g09440.1      | -0.493    | -0.136    | 0.861    | 1.165  |
| A011674_01 | At3g48560 | acetolactate synthase; protein id: At3g48560.1                | 0.332     | 0.337     | -0.005   | -0.016 |
| A011675_01 | At3g02350 | expressed protein; protein id: At3g02350.1                    | 0.329 NA  |           | -0.006   | -0.208 |

|            |           |                                                            |           |           |        |        |
|------------|-----------|------------------------------------------------------------|-----------|-----------|--------|--------|
| A011677_01 | At3g45600 | putative protein; protein id: At3g45600.1                  | -0.98     | -1.187    | -0.46  | -0.669 |
| A011678_01 | At3g54960 | protein disulfide-isomerase-like protein; protein id: A    | 1.033     | 0.856     | 0.447  | 0.833  |
| A011687_01 | At3g14100 | oligouridylate binding protein (UBP1), putative; prote     | -0.354    | -0.108    | -0.055 | -0.045 |
| A011689_01 | At3g50060 | myb DNA-binding protein (MYB77); protein id: At3g:         | 0.769     | 0.955     | 0.243  | 0.344  |
| A011691_01 | At3g20290 | expressed protein; protein id: At3g20290.1                 | -0.506 NA |           | -0.543 | -0.087 |
| A011692_01 | At3g54050 | fructose-bisphosphatase precursor; protein id: At3g:       | -0.851    | -0.658    | -0.775 | -0.923 |
| A011693_01 | At3g25545 | A.t. chromosome III BAC F14P13 genomic sequenc             | -0.006 NA |           | 0.244  | -0.038 |
| A011694_01 | At3g18490 | putative chloroplast nucleoid DNA-binding protein; p       | -0.906    | -0.744    | -0.272 | -0.419 |
| A011695_01 | At3g07630 | putative P-protein: chorismate mutase, prephenate          | 0.276     | 0.13      | -0.179 | 0.356  |
| A011696_01 | At3g60240 | protein synthesis initiation factor - like; protein id: At | -0.038 NA |           | 0.007  | -0.128 |
| A011700_01 | At3g20410 | calmodulin-domain protein kinase CDPK isoform 9;           | -0.298    | 0.241     | -0.183 | 0.19   |
| A011703_01 | At3g24180 | unknown protein; protein id: At3g24180.1                   | -0.118 NA | NA        | NA     |        |
| A011712_01 | At3g28450 | leucine-rich repeat transmembrane protein kinase, p NA     |           | NA        | -0.59  | -0.588 |
| A011713_01 | At3g28460 | unknown protein; protein id: At3g28460.1 NA                |           | NA        | 0.55   | 0.726  |
| A011716_01 | At3g48070 | putative protein; protein id: At3g48070.1                  | -0.768    | -0.688    | -0.568 | -0.635 |
| A011717_01 | At3g11830 | putative T-complex protein 1, ETA subunit; protein i       | 0.351     | 0.431     | 0.401  | 0.912  |
| A011718_01 | At3g11280 | myb-family transcription factor, putative; protein id: ,   | -1.258 NA |           | -0.319 | -0.159 |
| A011719_01 | At3g15920 | hypothetical protein; protein id: At3g15920.1              | 0.108 NA  |           | -0.95  | -0.135 |
| A011720_01 | At3g62830 | dTDP-glucose 4-6-dehydratase homolog D18; prote            | 0.279     | 0.404     | 0.25   | 0.434  |
| A011722_01 | At3g46040 | cytoplasmic ribosomal protein S15a -like; protein id:      | 0.579     | 0.566     | 0.487  | 0.609  |
| A011724_01 | At3g53540 | putative protein; protein id: At3g53540.1                  | -0.32     | -0.155    | -0.08  | 0.53   |
| A011725_01 | At3g45740 | putative protein; protein id: At3g45740.1                  | -0.598 NA | NA        |        | 0.239  |
| A011726_01 | At3g15353 | expressed protein; protein id: At3g15353.1                 | -3.646    | -3.404    | -1.642 | -2.056 |
| A011728_01 | At3g14200 | hypothetical protein; protein id: At3g14200.1              | -0.178    | -0.007    | 0.471  | 0.333  |
| A011732_01 | At3g62420 | bZIP family transcription factor; protein id: At3g6242     | -1.084    | -1.025    | -0.865 | -0.722 |
| A011740_01 | At3g54810 | GATA zinc finger protein; protein id: At3g54810.1 NA       |           | NA        | -0.176 | -0.033 |
| A011743_01 | At3g19290 | abscisic acid responsive elements-binding factor; pr       | 0.022     | -1.258    | -0.767 | -1.167 |
| A011749_01 | At3g14080 | Sm protein, putative; protein id: At3g14080.1              | 0.708     | 0.653 NA  |        | 0.291  |
| A011750_01 | At3g58740 | citrate synthase -like protein; protein id: At3g58740.     | -0.956    | -0.778 NA |        | -1.07  |
| A011752_01 | At3g03740 | expressed protein; protein id: At3g03740.1                 | -0.046    | -0.038    | 0.044  | -0.117 |
| A011755_01 | At3g04730 | auxin-induced protein; protein id: At3g04730.1             | -1.191    | -1.056    | -0.943 | -0.327 |
| A011757_01 | At3g60750 | transketolase - like protein; protein id: At3g60750.1      | -0.026    | -0.15     | -0.337 | -0.138 |
| A011758_01 | At3g11690 | expressed protein; protein id: At3g11690.1                 | -0.633    | -0.574    | -0.319 | -0.477 |
| A011760_01 | At3g48750 | cyclin-dependent kinase A;1; protein id: At3g48750.        | 0.442     | 0.434     | 0.372  | 0.715  |
| A011761_01 | At3g05000 | unknown protein; protein id: At3g05000.1                   | 0.926     | 0.906     | 0.676  | 0.459  |
| A011762_01 | At3g15090 | zinc-binding dehydrogenase, putative; protein id: At       | 0.735     | 0.482     | 0.462  | 0.663  |
| A011763_01 | At3g14990 | 4-methyl-5(b-hydroxyethyl)-thiazole monophosphate          | -1.299    | -1.39     | -1.008 | -0.602 |
| A011764_01 | At3g24050 | GATA transcription factor 1 (AtGATA-1); protein id:        | -0.423    | -0.392    | -0.08  | -0.602 |
| A011766_01 | At3g23750 | receptor-like kinase, putative; protein id: At3g23750      | 0.601     | 0.535     | 0.106  | 0.392  |
| A011767_01 | At3g13550 | E2, ubiquitin-conjugating enzyme, putative; protein i      | -0.964    | -0.667    | -0.486 | -1.626 |
| A011769_01 | At3g62820 | putative protein; protein id: At3g62820.1                  | -0.77     | -0.474    | 0.083  | -0.237 |
| A011770_01 | At3g03890 | auxin-regulated protein; protein id: At3g03890.1           | -0.725    | -0.946    | -0.352 | -0.719 |
| A011772_01 | At3g49240 | putative protein; protein id: At3g49240.1                  | 1.032     | 0.77      | 0.851  | 1.07   |
| A011773_01 | At3g01040 | unknown protein; protein id: At3g01040.1                   | 0.075 NA  | NA        |        | -0.404 |
| A011774_01 | At3g23900 | RRM-containing protein; protein id: At3g23900.1            | 0.294     | 0.109     | 0.045  | 0.247  |
| A011775_01 | At3g52880 | monodehydroascorbate reductase, putative; protein          | -0.328    | -0.522    | -0.146 | 0.136  |
| A011777_01 | At3g13445 | transcription initiation factor TFIID-1 (TATA sequenc      | -1.559 NA |           | -0.851 | -1.221 |
| A011778_01 | At3g57040 | responce reactor 4; protein id: At3g57040.1                | -0.388    | -0.128    | 0.187  | 0.117  |
| A011779_01 | At3g24030 | hydroxyethylthiazole kinase, putative; protein id: At3;    | 0.167     | 0.117     | 0.196  | -0.017 |
| A011780_01 | At3g15355 | hypothetical protein; protein id: At3g15355.1              | -0.3 NA   |           | -0.11  | -0.36  |
| A011781_01 | At3g51920 | putative calmodulin; protein id: At3g51920.1               | -2.254    | -2.66     | -1.017 | -2.689 |
| A011782_01 | At3g52140 | putative protein; protein id: At3g52140.1                  | 0.234     | 0.323     | 0.384  | 0.441  |
| A011784_01 | At3g04790 | putative ribose 5-phosphate isomerase; protein id: A       | 0.624     | 0.41      | 0.176  | 0.412  |
| A011788_01 | At3g21360 | unknown protein; protein id: At3g21360.1                   | -0.997    | -0.634    | -0.437 | -0.684 |
| A011793_01 | At3g47070 | putative protein; protein id: At3g47070.1                  | -0.34     | -0.519    | -0.591 | -1.099 |
| A011795_01 | At3g63160 | putative protein; protein id: At3g63160.1                  | -0.157    | -0.19     | -0.262 | -0.887 |
| A011797_01 | At3g47510 | putative protein; protein id: At3g47510.1                  | -0.33 NA  |           | 0.265  | -0.154 |
| A011798_01 | At3g62010 | putative protein; protein id: At3g62010.1                  | -0.362    | -0.523    | -0.267 | -0.245 |
| A011800_01 | At3g47470 | light-harvesting chlorophyll a/b binding protein; prote    | -0.633    | -0.929    | -0.525 | -0.675 |
| A011802_01 | At3g03330 | unknown protein; protein id: At3g03330.1                   | -0.41     | -0.252    | -0.134 | -0.174 |
| A011806_01 | At3g58570 | DEAD/DEAH box RNA helicase protein, putative; pr           | -0.245    | 0.217     | 0.123  | -0.098 |
| A011807_01 | At3g03150 | expressed protein; protein id: At3g03150.1                 | -1.053    | -1.069    | -0.314 | -1.064 |
| A011808_01 | At3g56130 | putative protein; protein id: At3g56130.1                  | 0.7       | 0.832     | 0.808  | 1.196  |
| A011810_01 | At3g04720 | hevein-like protein precursor (PR-4); protein id: At3g     | -2.255    | -2.028    | -1.624 | -1.822 |
| A011811_01 | At3g19710 | branched-chain amino acid aminotransferase, putat          | -4.023 NA | NA        | NA     |        |
| A011812_01 | At3g45310 | cysteine proteinase AALP, putative; protein id: At3g       | 0.071     | 0.099 NA  |        | 0.301  |
| A011813_01 | At3g58500 | protein phosphatase PP2A catalytic subunit; protein        | -0.382    | 0.026     | -0.152 | 0.458  |
| A011814_01 | At3g52930 | fructose bisphosphate aldolase - like protein; protei      | 0.394     | 0.47      | 0.544  | 1.088  |

|            |           |                                                           |        |        |        |        |
|------------|-----------|-----------------------------------------------------------|--------|--------|--------|--------|
| A011816_01 | At3g50690 | putative protein; protein id: At3g50690.1                 | -0.21  | -0.29  | -0.487 | -0.723 |
| A011817_01 | At3g50700 | zinc finger protein; protein id: At3g50700.1              | -0.76  | -0.846 | -0.324 | -0.932 |
| A011819_01 | At3g61890 | homeobox-leucine zipper protein ATHB-12; protein          | -2.715 | -3.215 | -1.352 | -1.648 |
| A011820_01 | At3g56360 | putative protein; protein id: At3g56360.1                 | -1.638 | -1.906 | -0.972 | -1.983 |
| A011822_01 | At3g58610 | ketol-acid reductoisomerase; protein id: At3g58610.       | 1.043  | 0.773  | 0.421  | 0.971  |
| A011825_01 | At3g51040 | putative protein; protein id: At3g51040.1                 | -0.291 | NA     | -0.03  | -0.135 |
| A011826_01 | At3g62980 | transport inhibitor response 1 (TIR1), AtFBL1; prote      | -0.003 | -0.124 | -0.342 | -0.467 |
| A011830_01 | At3g16000 | myosin heavy chain-like protein; protein id: At3g160      | 0.28   | 0.246  | -0.165 | -0.137 |
| A011831_01 | At3g51130 | putative protein; protein id: At3g51130.1                 | -1.345 | -1.262 | -0.442 | -0.824 |
| A011838_01 | At3g47120 | RRM-containing RNA-binding protein, putative; prot        | -0.011 | -0.218 | NA     | -0.09  |
| A011842_01 | At3g29075 | hypothetical protein; protein id: At3g29075.1             | 0.22   | 0.011  | 0.377  | 0.056  |
| A011843_01 | xxxx      | b/t early light-induced protein; protein id: At3g22840    | 0.153  | 0.457  | 0.392  | 0.53   |
| A011844_01 | At3g57190 | putative protein; protein id: At3g57190.1                 | -0.451 | -0.671 | -0.422 | -0.343 |
| A011852_01 | At4g27040 | SNF8 like protein; protein id: At4g27040.1                | -0.075 | -0.088 | -0.04  | 0.183  |
| A011853_01 | At3g08890 | expressed protein; protein id: At3g08890.1                | 0.099  | -0.102 | 0.15   | 0.304  |
| A011854_01 | At3g45640 | mitogen-activated protein kinase 3; protein id: At3g4     | -1.26  | -1.529 | -0.621 | -0.882 |
| A011855_01 | At3g50000 | casein kinase II, alpha chain 2 (CK II); protein id: At   | -0.062 | 0.006  | 0.047  | 0.275  |
| A011856_01 | At3g53570 | protein kinase (AME2/AFC1); protein id: At3g53570         | -0.324 | NA     | -0.113 | -0.228 |
| A011858_01 | At3g54080 | putative protein; protein id: At3g54080.1                 | 0.863  | 0.625  | 0.744  | 0.768  |
| A011859_01 | At3g61140 | COP9 complex subunit, FUS6; protein id: At3g6114          | 0.33   | 0.272  | 0.213  | 0.62   |
| A011861_01 | At3g54820 | aquaporin/MIP - like protein; protein id: At3g54820.      | 1.548  | 1.494  | 1.096  | 1.505  |
| A011862_01 | At3g54140 | peptide transport - like protein; protein id: At3g5414    | -2.146 | -2.258 | -1.542 | -2.045 |
| A011864_01 | At3g54200 | putative protein; protein id: At3g54200.1                 | -0.705 | NA     | NA     | -1.377 |
| A011865_01 | At3g54220 | scarecrow1; protein id: At3g54220.1                       | 0.112  | 0.207  | NA     | 0.373  |
| A011866_01 | At3g47900 | putative protein; protein id: At3g47900.1                 | -0.158 | -0.169 | -0.064 | 0.332  |
| A011870_01 | At3g48430 | similar to zinc finger protein - like; protein id: At3g48 | 0.535  | 0.114  | NA     | 0.461  |
| A011872_01 | At3g61520 | putative protein; protein id: At3g61520.1                 | 1.043  | NA     | NA     | 1.009  |
| A011874_01 | At3g61570 | putative protein; protein id: At3g61570.1                 | -0.421 | -0.497 | -0.292 | -0.929 |
| A011875_01 | At3g57690 | arabinogalactan-protein, putative (AGP23); protein i      | -0.54  | -0.661 | -0.89  | -1.432 |
| A011877_01 | At3g57650 | 1-acylcerol-3-phosphate acyltransferase - like protei     | 0.236  | -0.079 | 0.199  | 0.172  |
| A011881_01 | At3g61710 | AtAPG6; putative protein; protein id: At3g61710.1         | -0.546 | -0.43  | -0.116 | -0.3   |
| A011885_01 | At3g61780 | putative protein; protein id: At3g61780.1                 | 0.441  | 0.431  | 0.259  | 0.381  |
| A011887_01 | At3g52070 | putative protein; protein id: At3g52070.1                 | -1.262 | NA     | NA     | NA     |
| A011888_01 | At3g61130 | putative protein; protein id: At3g61130.1                 | 0.681  | 0.614  | 0.035  | 0.173  |
| A011889_01 | At3g61210 | putative protein; protein id: At3g61210.1                 | NA     | NA     | NA     | NA     |
| A011890_01 | At3g52090 | DNA-directed RNA polymerase II 13.6K chain; prote         | 0.652  | 0.414  | 0.507  | 0.52   |
| A011895_01 | At3g50780 | putative protein; protein id: At3g50780.1                 | 0.411  | 0.325  | 0.357  | 0.795  |
| A011896_01 | At3g07820 | polygalacturonase, putative; protein id: At3g07820.1      | -0.994 | -0.741 | -1.521 | -1.321 |
| A011901_01 | At3g56740 | putative protein; protein id: At3g56740.1                 | -0.299 | -0.207 | NA     | -0.155 |
| A011903_01 | At3g56770 | bHLH protein; protein id: At3g56770.1                     | -0.004 | 0.126  | NA     | 0.067  |
| A011910_01 | At3g22630 | 20S proteasome beta subunit D (PBD1); protein id:         | 0.629  | 0.554  | 0.649  | 0.963  |
| A011912_01 | At3g45300 | isovaleryl-CoA-dehydrogenase precursor (IVD); pro         | -2.677 | -2.492 | -1.945 | -2.546 |
| A011915_01 | At3g52910 | putative protein; protein id: At3g52910.1                 | 0.943  | 1.052  | 0.895  | 0.997  |
| A011921_01 | At3g53030 | serine protein kinase - like; protein id: At3g53030.1     | -0.345 | NA     | NA     | -0.533 |
| A011932_01 | At3g61930 | hypothetical protein; protein id: At3g61930.1             | -1.984 | -2.001 | -0.92  | -1.983 |
| A011935_01 | At3g62460 | putative protein; protein id: At3g62460.1                 | 0.591  | 0.597  | 0.788  | 0.764  |
| A011936_01 | At3g26780 | unknown protein; protein id: At3g26780.1                  | 0.405  | NA     | 0.476  | 0.668  |
| A011941_01 | At3g16170 | putative long-chain acyl-CoA synthetase; protein id:      | 0.293  | 0.604  | NA     | 1.271  |
| A011942_01 | At3g56040 | putative protein; protein id: At3g56040.1                 | 0.483  | 0.529  | -0.156 | 0.246  |
| A011946_01 | At3g26640 | transcriptional regulator protein, putative; protein id:  | -0.029 | -0.113 | -0.426 | -0.219 |
| A011949_01 | At3g57150 | putative protein; protein id: At3g57150.1                 | 0.777  | 0.916  | 0.865  | 1.109  |
| A011950_01 | At3g47700 | putative protein; protein id: At3g47700.1                 | -0.176 | -0.315 | NA     | -0.111 |
| A011957_01 | At3g06210 | hypothetical protein; protein id: At3g06210.1             | -0.845 | -0.947 | -0.703 | -0.96  |
| A011963_01 | At3g27960 | hypothetical protein; protein id: At3g27960.1             | -1.352 | -1.625 | -1.525 | -1.717 |
| A011965_01 | At3g56450 | alpha-soluble NSF attachment protein-like; protein i      | -0.476 | -0.176 | NA     | 0.32   |
| A011966_01 | At3g53520 | dTDP-glucose 4-6-dehydratase -like protein; protein       | 0.088  | -0.006 | -0.183 | 0.011  |
| A011967_01 | At3g20920 | expressed protein; protein id: At3g20920.1                | 0.053  | 0.101  | 0.207  | 0.333  |
| A011976_01 | At3g10910 | putative RING zinc finger protein; protein id: At3g10     | -2.249 | NA     | -0.637 | -1.949 |
| A011977_01 | At3g54380 | T12E18.70                                                 | -0.157 | -0.374 | -0.241 | -0.093 |
| A011978_01 | At3g63190 | putative protein; protein id: At3g63190.1                 | 1.038  | 0.543  | 0.523  | 0.5    |
| A011985_01 | At3g53780 | putative protein; protein id: At3g53780.1                 | -0.48  | -0.707 | -0.544 | -0.619 |
| A011986_01 | xxxx      | b/t hypothetical protein At3g13880.1 & myb family tr      | 0.653  | 0.613  | 0.755  | 0.737  |
| A011988_01 | At3g17465 | ribosomal protein L3; protein id: At3g17465.1             | 1.016  | 0.78   | 0.689  | 0.807  |
| A011992_01 | At3g59360 | transporter-like protein; protein id: At3g59360.1         | 0.084  | 0.104  | -0.424 | -0.096 |
| A011995_01 | At3g16640 | translationally controlled tumor protein-like protein; p  | -0.655 | -0.559 | -0.322 | -0.401 |
| A011996_01 | At3g09650 | hypothetical protein; protein id: At3g09650.1             | -0.247 | -0.275 | NA     | -0.037 |
| A012001_01 | At3g06780 | expressed protein; protein id: At3g06780.1                | -1.45  | -1.101 | -0.58  | -1.244 |
| A012008_01 | At3g02710 | unknown protein; protein id: At3g02710.1                  | 1.103  | 0.725  | 0.541  | 0.604  |

|            |           |                                                               |        |        |    |        |        |
|------------|-----------|---------------------------------------------------------------|--------|--------|----|--------|--------|
| A012009_01 | At3g47850 | putative protein; protein id: At3g47850.1                     | -0.099 | -0.054 | NA |        | -0.241 |
| A012010_01 | At3g44110 | DnaJ protein homolog atj3; protein id: At3g44110.1            | -0.482 | -0.269 |    | 0.092  | 0.418  |
| A012011_01 | At3g02690 | expressed protein; protein id: At3g02690.1                    |        | -0.283 | NA | -0.019 | -0.031 |
| A012012_01 | At3g58760 | putative protein; protein id: At3g58760.1                     | -0.046 | NA     |    | -0.373 | -0.045 |
| A012013_01 | At3g22410 | hypothetical protein; protein id: At3g22410.1                 | -0.38  | NA     |    | 0.254  | -0.294 |
| A012014_01 | At3g06860 | fatty acid multifunctional protein (AtMFP2); protein i        | -0.579 | -0.918 |    | -0.146 | -0.408 |
| A012021_01 | At3g02630 | putative stearyl-acyl carrier protein desaturase; prc         | 0.705  | 0.677  |    | 0.499  | 0.865  |
| A012028_01 | At3g16370 | putative APG protein; protein id: At3g16370.1                 | 1.241  | 0.76   |    | 0.841  | 1.449  |
| A012030_01 | At3g02480 | expressed protein; protein id: At3g02480.1                    | -0.664 | -0.565 |    | -0.701 | -1.406 |
| A012031_01 | At3g02880 | leucine-rich repeat transmembrane protein kinase, $\gamma$    | 0.508  | NA     |    | -0.077 | -0.393 |
| A012033_01 | At3g04260 | hypothetical protein; protein id: At3g04260.1                 | 0.482  | 0.044  |    | 0.063  | -0.178 |
| A012039_01 | At3g02560 | putative 40S ribosomal protein; protein id: At3g02560.1       | 1.011  | 0.627  |    | 0.697  | 1.174  |
| A012043_01 | At3g22680 | unknown protein; protein id: At3g22680.1                      | 0.073  | 0.118  |    | 0.646  | 0.325  |
| A012046_01 | At3g44150 | putative protein; protein id: At3g44150.1                     | 0.131  | NA     |    | 0.357  | NA     |
| A012049_01 | At3g02875 | IAA-amino acid hydrolase (ILR1); protein id: At3g02875.1      | -1.273 | -1.571 |    | -1.205 | -1.519 |
| A012050_01 | At3g02900 | unknown protein; protein id: At3g02900.1                      | 0.516  | 0.579  |    | 0.536  | 0.015  |
| A012060_01 | At3g11800 | expressed protein; protein id: At3g11800.1                    | 0.473  | 0.303  |    | 0.408  | 0.184  |
| A012066_01 | At3g06190 | expressed protein; protein id: At3g06190.1                    | -0.278 | -0.238 |    | -0.38  | -0.827 |
| A012068_01 | At3g09890 | expressed protein; protein id: At3g09890.1                    | 0.476  | NA     | NA |        | 0.335  |
| A012069_01 | At3g55410 | 2-oxoglutarate dehydrogenase, E1 subunit - like pro           | 0.753  | 0.286  |    | 0.136  | 0.397  |
| A012075_01 | At3g19930 | monosaccharide transport protein, STP4; protein id:           | -0.524 | NA     |    | -0.533 | -1.398 |
| A012076_01 | At3g50950 | disease resistance protein (CC-NBS-LRR class), pu             | -0.404 | -0.807 |    | -0.473 | -0.914 |
| A012078_01 | At3g52120 | gamma response I protein; protein id: At3g52120.1             | -0.398 | -0.559 |    | -0.122 | -0.384 |
| A012079_01 | At3g26730 | RING zinc finger protein, putative; protein id: At3g26730.1   | 0.005  | -0.153 |    | -0.14  | -0.218 |
| A012080_01 | At3g12610 | DNA-damage-repair/tolerance protein, putative (DR             | 0.733  | 0.744  |    | 1.265  | 1.664  |
| A012084_01 | At3g23910 | HAPp48,5 protein; protein id: At3g23910.1                     | 0.178  | -0.057 |    | 0.298  | 0.594  |
| A012085_01 | At3g16940 | calmodulin-binding protein; protein id: At3g16940.1           | -0.679 | -1.228 | NA |        | -0.87  |
| A012086_01 | At3g17000 | E2, ubiquitin-conjugating enzyme, putative; protein i         | -1.238 | -1.316 |    | -0.159 | -0.424 |
| A012088_01 | At3g07170 | expressed protein; protein id: At3g07170.1                    | 0.139  | 0.42   |    | 0.52   | 0.773  |
| A012091_01 | At3g26280 | cytochrome p450 family; protein id: At3g26280.1               | NA     | NA     | NA | NA     | NA     |
| A012092_01 | At3g17090 | protein phosphatase-2c, putative; protein id: At3g17090.1     | 0.277  | 0.341  |    | 0.26   | 0.674  |
| A012093_01 | At3g07230 | putative wound-induced basic protein; protein id: At3g07230.1 | 0.601  | 0.741  |    | 0.931  | 0.716  |
| A012098_01 | At3g06620 | protein kinase, putative; protein id: At3g06620.1             | -0.136 | -0.378 |    | -0.125 | -0.083 |
| A012104_01 | At3g25165 | expressed protein; protein id: At3g25165.1                    | -0.343 | -0.559 |    | -1.034 | -2.256 |
| A012108_01 | At3g03160 | expressed protein; protein id: At3g03160.1                    | 0.497  | 0.609  |    | 0.53   | 0.29   |
| A012113_01 | At3g02750 | protein phosphatase 2C (PP2C); protein id: At3g02750.1        | -1.255 | -0.888 |    | -1.01  | -0.39  |
| A012115_01 | At3g18680 | uridylate kinase, putative; protein id: At3g18680.1           | 1.151  | 1.042  |    | 0.697  | 1.146  |
| A012116_01 | At3g12520 | sulphate transporter, putative; protein id: At3g12520.1       | -0.017 | -0.162 | NA |        | -0.886 |
| A012117_01 | At3g09410 | pectinacetyltransferase family; protein id: At3g09410.1       | 0.049  | 0.175  |    | 0.382  | 0.533  |
| A012119_01 | At3g47420 | putative protein; protein id: At3g47420.1                     | -1.318 | -1.088 |    | -0.1   | -0.318 |
| A012120_01 | At3g18750 | mitogen activated protein kinase kinase, putative; p          | 0.568  | NA     |    | 0.068  | 0.468  |
| A012123_01 | At3g18773 | pseudogene, unknown protein                                   | -1.522 | NA     |    | -0.498 | -1.67  |
| A012125_01 | At3g18790 | unknown protein; protein id: At3g18790.1                      | 0.09   | NA     |    | 0.416  | 0.594  |
| A012126_01 | At3g09320 | expressed protein; protein id: At3g09320.1                    | -0.292 | -0.691 |    | -0.588 | -0.43  |
| A012127_01 | At3g29270 | unknown protein; protein id: At3g29270.1                      | -0.434 | NA     |    | -0.474 | -0.63  |
| A012129_01 | At3g61080 | putative protein; protein id: At3g61080.1                     | -0.144 | -0.194 |    | -0.695 | -0.648 |
| A012130_01 | At3g05550 | unknown protein; protein id: At3g05550.1                      | 0.219  | 0.34   |    | 0.497  | 0.385  |
| A012131_01 | At3g05560 | putative 60S ribosomal protein L22; protein id: At3g05560.1   | 0.982  | 0.627  |    | 0.866  | 1.203  |
| A012132_01 | At3g29220 | hypothetical protein; protein id: At3g29220.1                 | 0.766  | 0.511  |    | 0.548  | 0.415  |
| A012134_01 | At3g05670 | unknown protein; protein id: At3g05670.1                      | -0.135 | -0.887 | NA |        | -0.575 |
| A012141_01 | At3g54890 | light-harvesting chlorophyll a/b binding protein; prote       | 0.039  | -0.339 |    | -0.209 | -0.368 |
| A012144_01 | xxxx      | b/t expressed protein; protein id: At3g08840.1 and p          | -0.463 | NA     | NA |        | -0.762 |
| A012145_01 | At3g04940 | putative cysteine synthase; protein id: At3g04940.1           | 0.225  | -0.315 |    | 0.08   | 0.077  |
| A012149_01 | At3g08880 | hypothetical protein; protein id: At3g08880.1                 | 0.18   | -0.187 |    | -0.135 | -0.315 |
| A012150_01 | At3g13570 | arginine/serine-rich splicing factor SCL30a; protein i        | 0.306  | -0.179 |    | 0.348  | 0.154  |
| A012155_01 | At3g03990 | expressed protein; protein id: At3g03990.1                    | -1.232 | -0.942 |    | -0.243 | -0.598 |
| A012158_01 | At3g01370 | unknown protein; protein id: At3g01370.1                      | 0.557  | 0.285  |    | -0.148 | 0.007  |
| A012159_01 | At3g09950 | hypothetical protein; protein id: At3g09950.1                 | -0.543 | -0.318 |    | -0.19  | -1.043 |
| A012163_01 | At3g10150 | hypothetical protein; protein id: At3g10150.1                 | -0.475 | -0.498 | NA |        | 0.534  |
| A012167_01 | At3g62120 | multifunctional aminoacyl-tRNA ligase-like protein; $\gamma$  | 0.876  | 0.613  |    | 0.497  | 0.976  |
| A012168_01 | At3g01320 | unknown protein; protein id: At3g01320.1                      | -0.435 | -0.822 | NA |        | -0.393 |
| A012171_01 | At3g04780 | expressed protein; protein id: At3g04780.1                    | 0.433  | -0.08  |    | 0.321  | 0.167  |
| A012174_01 | At3g51500 | putative protein; protein id: At3g51500.1                     | -0.441 | -0.396 |    | 0.068  | -0.694 |
| A012175_01 | At3g51510 | putative protein; protein id: At3g51510.1                     | -0.107 | -0.087 |    | -0.612 | -0.485 |
| A012176_01 | At3g51520 | putative protein; protein id: At3g51520.1                     | -0.548 | -0.284 |    | -0.576 | -0.578 |
| A012178_01 | At3g04760 | expressed protein; protein id: At3g04760.1                    | -0.153 | -0.466 |    | -0.64  | -0.311 |
| A012184_01 | At3g02290 | expressed protein; protein id: At3g02290.1                    | -1.105 | -0.747 |    | -0.168 | 0.2    |
| A012185_01 | At3g51160 | GDP-D-mannose-4,6-dehydratase (MUR1); protein                 | 0.739  | 0.47   |    | 0.35   | 0.307  |

|            |           |                                                           |        |        |        |        |
|------------|-----------|-----------------------------------------------------------|--------|--------|--------|--------|
| A012186_01 | At3g02130 | leucine-rich repeat transmembrane protein kinase, Ꞥ       | -0.55  | -0.578 | -0.551 | -0.852 |
| A012193_01 | At3g01850 | putative D-ribulose-5-phosphate 3-epimerase; prote        | -0.575 | -0.344 | -0.159 | -0.265 |
| A012200_01 | At3g10940 | expressed protein; protein id: At3g10940.1                | 0.879  | 0.843  | 0.321  | 0.492  |
| A012203_01 | At3g14930 | uroporphyrinogen decarboxylase, putative; protein id:     | 0.841  | 0.677  | 0.08   | 0.424  |
| A012207_01 | At3g26520 | gamma tonoplast intrinsic protein; protein id: At3g26     | -0.469 | -0.52  | -0.232 | -1.085 |
| A012210_01 | At3g18524 | hypothetical protein; protein id: At3g18524.1             | 0.272  | 0.12   | -0.005 | -0.26  |
| A012213_01 | At3g12120 | omega-6 fatty acid desaturase, endoplasmic reticul        | 0.525  | 0.412  | -0.163 | 0.248  |
| A012214_01 | At3g61470 | light-harvesting chlorophyll a/b binding protein; prote   | -1.13  | -1.06  | -0.584 | -0.681 |
| A012215_01 | At3g06483 | putative pyruvate dehydrogenase kinase; protein id:       | -0.182 | -0.624 | -0.687 | -1.158 |
| A012218_01 | At3g58560 | putative protein; protein id: At3g58560.1                 | 0.169  | 0.046  | -0.068 | 0.174  |
| A012219_01 | At3g01740 | expressed protein; protein id: At3g01740.1                | 0.062  | 0.059  | 0.347  | -0.054 |
| A012221_01 | At3g60250 | regulatory subunit of protein kinase CK2; protein id:     | -0.248 | -0.226 | 0.103  | 0.142  |
| A012223_01 | At3g20015 | hypothetical protein; protein id: At3g20015               | 0.454  | NA     | 0.325  | 0.712  |
| A012229_01 | At3g01590 | expressed protein; protein id: At3g01590.1                | -0.182 | NA     | -0.005 | -0.009 |
| A012231_01 | At3g47440 | aquaporin-like protein; protein id: At3g47440.1           | -0.459 | NA     | NA     | NA     |
| A012234_01 | At3g15260 | protein phosphatase 2C (PP2C); protein id: At3g152        | 0.137  | -0.07  | 0.249  | 0.163  |
| A012237_01 | At3g20230 | expressed protein; protein id: At3g20230.1                | 0.566  | 0.254  | 0.66   | 0.333  |
| A012239_01 | At3g03590 | expressed protein; protein id: At3g03590.1                | 0.417  | 0.535  | 0.806  | 0.589  |
| A012247_01 | At3g25040 | ER lumen retaining receptor (HDEL receptor), putat        | 0.515  | 0.509  | 0.496  | 0.839  |
| A012251_01 | At3g18240 | expressed protein; protein id: At3g18240.1                | 1.118  | 1.152  | 1.08   | 1.731  |
| A012254_01 | At3g54850 | putative protein; protein id: At3g54850.1                 | -0.611 | -0.412 | -0.436 | -0.182 |
| A012256_01 | At3g10320 | unknown protein; protein id: At3g10320.1                  | -2.63  | -2.636 | NA     | -1.593 |
| A012257_01 | At3g10340 | putative phenylalanine ammonia-lyase; protein id: A       | -2.879 | -3.201 | -1.332 | NA     |
| A012259_01 | At3g07540 | expressed protein; protein id: At3g07540.1                | 1.586  | 1.329  | 1.081  | 1.383  |
| A012264_01 | At3g08990 | Yippee-like protein; protein id: At3g08990.1              | 1.033  | 0.794  | 0.443  | 0.598  |
| A012272_01 | At3g03940 | putative casein kinase; protein id: At3g03940.1           | -0.118 | 0.012  | 0.038  | 0.89   |
| A012275_01 | At3g07700 | expressed protein; protein id: At3g07700.1                | -1.753 | -2.074 | -1.362 | -1.654 |
| A012276_01 | At3g21140 | unknown protein; protein id: At3g21140.1                  | 0.293  | 0.171  | 0.384  | 0.458  |
| A012277_01 | At3g07650 | CONSTANS B-box zinc finger family protein; proteir        | -0.47  | -0.337 | -0.003 | -0.019 |
| A012283_01 | At3g22560 | hypothetical protein; protein id: At3g22560.1             | -2.086 | -1.976 | -1.075 | NA     |
| A012291_01 | At3g13410 | expressed protein; protein id: At3g13410.2                | 0.014  | -0.379 | -0.329 | -0.032 |
| A012293_01 | At3g23325 | expressed protein; protein id: At3g23325.1                | 0.065  | 0.37   | 0.437  | 0.248  |
| A012294_01 | At3g56950 | putative protein; protein id: At3g56950.1                 | -0.462 | -0.434 | 0.086  | 0.224  |
| A012295_01 | At3g61050 | CaLB protein; protein id: At3g61050.1                     | 0.433  | 0.13   | 0.19   | -0.024 |
| A012299_01 | At3g05010 | expressed protein; protein id: At3g05010.1                | -0.433 | -0.402 | -0.262 | -0.076 |
| A012309_01 | At3g28500 | acidic ribosomal protein P2b (rpp2b), putative; prote     | 0.608  | 0.662  | 0.574  | 0.972  |
| A012311_01 | At3g05590 | putative 60S ribosomal protein L18; protein id: At3g      | 0.811  | 0.377  | 0.588  | 0.883  |
| A012313_01 | At3g27530 | expressed protein; protein id: At3g27530.1                | -0.018 | -0.476 | -0.309 | -0.49  |
| A012321_01 | At3g08550 | hypothetical protein; protein id: At3g08550.1             | 0.59   | NA     | NA     | -0.088 |
| A012323_01 | At3g15110 | expressed protein; protein id: At3g15110.1                | 0.469  | 0.593  | 0.071  | 0.179  |
| A012324_01 | At3g56070 | peptidylprolyl isomerase; protein id: At3g56070.1         | 1.042  | 1.133  | 1.312  | 1.66   |
| A012325_01 | At3g02470 | S-adenosylmethionine decarboxylase; protein id: At        | -0.433 | -1.043 | -0.743 | -0.765 |
| A012326_01 | At3g08710 | thioredoxin-like protein; protein id: At3g08710.1         | -0.339 | -0.49  | -0.139 | -0.077 |
| A012331_01 | At3g16240 | delta tonoplast integral protein (delta-TIP); protein id: | 0.608  | 0.602  | 0.513  | 1.352  |
| A012332_01 | At3g06500 | neutral invertase, putative; protein id: At3g06500.1      | -0.318 | -0.846 | -0.877 | -0.693 |
| A012334_01 | At3g13120 | 30S ribosomal protein S10, putative; protein id: At3g     | 0.474  | 0.379  | 0.111  | 0.013  |
| A012336_01 | At3g57550 | guanylate kinase-like protein; protein id: At3g57550      | -0.127 | -0.279 | 0.077  | 0.714  |
| A012337_01 | At3g45050 | putative protein; protein id: At3g45050.1                 | 0.634  | 0.744  | 0.403  | 0.195  |
| A012340_01 | At3g13990 | hypothetical protein; protein id: At3g13990.1             | 0.143  | -0.001 | 0.307  | 0.145  |
| A012341_01 | At3g12270 | arginine N-methyltransferase 3, putative; protein id:     | 0.477  | 0.386  | NA     | 0.544  |
| A012351_01 | At3g49690 | myb family transcription factor (AtMYB84); protein id     | 0.415  | 0.602  | 0.355  | 0.022  |
| A012353_01 | At3g21530 | unknown protein; protein id: At3g21530.1                  | 0.344  | 0.162  | -0.212 | 0.09   |
| A012354_01 | At3g11320 | integral membrane protein, putative; protein id: At3g     | -0.183 | -0.172 | -0.447 | -0.571 |
| A012357_01 | At3g18040 | putative MAP kinase; protein id: At3g18040.1              | 0.24   | -0.057 | 0.133  | 0.184  |
| A012360_01 | At3g11310 | hypothetical protein; protein id: At3g11310.1             | -0.707 | -0.922 | -0.64  | -1.144 |
| A012364_01 | At3g43220 | putative protein; protein id: At3g43220.1                 | -0.315 | 0.186  | -0.769 | -0.024 |
| A012366_01 | At3g49870 | ADP-RIBOSYLATION FACTOR -like protein; protei             | -0.054 | NA     | NA     | -0.497 |
| A012367_01 | At3g21650 | B regulatory subunit of PP2A, putative; protein id: A     | -0.809 | -0.691 | -1.085 | -1.047 |
| A012369_01 | At3g44240 | CCR4-associated factor 1-like protein; protein id: At     | -1.366 | NA     | NA     | NA     |
| A012370_01 | At3g23030 | auxin-inducible gene (IAA2); protein id: At3g23030.       | -0.516 | -0.631 | -0.541 | -0.689 |
| A012371_01 | At3g55760 | putative protein; protein id: At3g55760.1                 | 0.39   | 0.666  | 0.537  | 0.576  |
| A012372_01 | At3g15530 | expressed protein; protein id: At3g15530.1                | -0.04  | -0.087 | 0.249  | 0.106  |
| A012373_01 | At3g57785 | expressed protein; protein id: At3g57785.1                | -0.052 | 0.076  | -0.305 | 0.041  |
| A012375_01 | At3g12680 | hypothetical protein; protein id: At3g12680.1             | -0.731 | -0.901 | -0.669 | -0.744 |
| A012377_01 | At3g12690 | protein kinase, putative; protein id: At3g12690.1         | -0.024 | NA     | NA     | -0.147 |
| A012379_01 | At3g16110 | putative protein disulfide isomerase; protein id: At3g    | -0.908 | -1.53  | -1.076 | -1.848 |
| A012381_01 | At3g12730 | regulatory protein of P-starvation acclimation respor     | -0.554 | -0.696 | -0.293 | -0.69  |
| A012382_01 | At3g55690 | putative protein; protein id: At3g55690.1                 | 0.622  | 0.418  | 0.615  | 1.154  |

|            |               |                                                                                |           |           |           |        |
|------------|---------------|--------------------------------------------------------------------------------|-----------|-----------|-----------|--------|
| A012385_01 | At3g06040     | hypothetical protein; protein id: At3g06040.1                                  | -1.097    | -1.096    | -0.672    | -0.936 |
| A012386_01 | At3g57810     | auxin-regulated protein; protein id: At3g57810.1                               | -1.849 NA | NA        | NA        |        |
| A012388_01 | At3g05020     | acyl carrier protein 1 precursor (ACP); protein id: At3g05020.1                | 0.389     | 0.259     | -0.056    | 0.495  |
| A012390_01 | At3g48160     | DP-E2F-like protein 1; protein id: At3g48160.1                                 | 0.287     | 0.36      | 0.372     | 0.797  |
| A012393_01 | At3g12540     | hypothetical protein; protein id: At3g12540.1                                  | 0.542     | 0.565     | 0.485     | 0.843  |
| A012396_01 | At3g57960     | hypothetical protein; protein id: At3g57960.1                                  | -0.544    | -0.94     | -0.426    | -0.213 |
| A012397_01 | At3g22220     | hypothetical protein; protein id: At3g22220.1                                  | -0.671    | -1.043    | -0.796    | -0.372 |
| A012398_01 | At3g11650     | hairpin-induced protein, putative (HIN1); protein id: At3g11650.1              | -0.887    | -0.626    | -0.578    | -0.501 |
| A012400_01 | At3g15330     | hypothetical protein; protein id: At3g15330.1                                  | -0.388    | -0.657    | -0.272    | -0.254 |
| A012402_01 | At3g15250     | hypothetical protein; protein id: At3g15250.1                                  | 0.364     | 0.169     | -0.021    | 0.041  |
| A012404_01 | At3g12900     | hypothetical protein; protein id: At3g12900.1                                  | NA        | -0.535    | -0.81     | -1.192 |
| A012407_01 | At3g19330     | hypothetical protein; protein id: At3g19330.1                                  | -0.038    | -0.232    | -0.004    | 0.096  |
| A012410_01 | At3g59350     | protein kinase-like protein; protein id: At3g59350.1                           | -0.765 NA | NA        | NA        | -0.41  |
| A012415_01 | At3g19460     | expressed protein; protein id: At3g19460.1                                     | NA        | NA        | NA        | NA     |
| A012421_01 | At3g19500     | expressed protein; protein id: At3g19500.1                                     | -0.784    | -1.31     | -1.13     | -1.35  |
| A012422_01 | At3g06380     | F-box containing tubby family protein; protein id: At3g06380.1                 | 0.793     | 0.652     | 0.062     | 0.268  |
| A012423_01 | At3g16810     | expressed protein; protein id: At3g16810.1                                     | 0.061     | -0.583    | -0.799    | -0.732 |
| A012425_01 | At3g16840     | DEAD/DEAH box RNA helicase, putative; protein id: At3g16840.1                  | 0.153     | 0.086     | -0.248    | -1.133 |
| A012428_01 | At3g62610     | myb family transcription factor; protein id: At3g62610.1                       | 0.204     | 0.361     | 0.446     | 0.015  |
| A012429_01 | At3g29690     | hypothetical protein; protein id: At3g29690.1                                  | 1.829     | 1.606     | 1.259     | 2.054  |
| A012430_01 | At3g59270     | putative protein; protein id: At3g59270.1                                      | -2.797    | -3.814    | -1.766    | -2.133 |
| A012440_01 | At3g50620     | hypothetical protein; protein id: At3g50620.1                                  | -0.572 NA | NA        | NA        | NA     |
| A012442_01 | At3g17930     | expressed protein; protein id: At3g17930.1                                     | -0.965    | -0.966    | -0.897    | -1.387 |
| A012445_01 | At3g18010     | hypothetical protein; protein id: At3g18010.1                                  | -0.267    | -0.433    | -0.036    | -0.161 |
| A012449_01 | At3g23620     | expressed protein; protein id: At3g23620.1                                     | 0.538     | 0.622     | 0.769     | 0.928  |
| A012451_01 | At3g15180     | expressed protein; protein id: At3g15180.1                                     | 0.439     | 0.047     | 0.161     | 0.282  |
| A012454_01 | At3g50070     | cyclin D3;3; protein id: At3g50070.1                                           | 1.22      | 0.994     | 0.817     | 1.255  |
| A012458_01 | At3g04120     | glyceraldehyde-3-phosphate dehydrogenase C subunit; protein id: At3g04120.1    | 0.381     | 0.645     | 0.73      | 1.473  |
| A012460_01 | At3g61870     | putative protein; protein id: At3g61870.1                                      | 0.545     | 0.444     | 0.326     | -0.308 |
| A012464_01 | At3g21200     | expressed protein; protein id: At3g21200.1                                     | 0.541     | 0.525     | 0.177     | 0.525  |
| A012466_01 | At3g21215     | similar to RRM-containing protein; protein id: At3g21215.1                     | NA        | NA        | -0.168    | -0.662 |
| A012467_01 | At3g21230     | putative 4-coumarate:CoA ligase 2; protein id: At3g21230.1                     | -2.071 NA | NA        | NA        | NA     |
| A012468_01 | At3g53810     | serine/threonine-specific kinase like protein; protein id: At3g53810.1         | -1.202    | -1.041    | -0.741    | -1.126 |
| A012469_01 | At3g29400     | hypothetical protein; protein id: At3g29400.1                                  | -0.16     | -0.308 NA |           | -0.064 |
| A012473_01 | At3g48820     | sialyltransferase family; protein id: At3g48820.1                              | 0.644 NA  |           | 0.079     | 0.288  |
| A012479_01 | At3g13230     | expressed protein; protein id: At3g13230.1                                     | 0.748     | 0.733     | 0.948     | 1.042  |
| A012482_01 | At3g46020     | RRM-containing protein; protein id: At3g46020.1                                | -0.141    | 0.397     | 0.615     | 0.346  |
| A012487_01 | At3g42950     | polygalacturonase, putative; protein id: At3g42950.1                           | -0.183    | -0.364 NA |           | -0.073 |
| A012493_01 | At3g50100     | exonuclease, putative; protein id: At3g50100.1                                 | 0.766     | 0.984     | 1.083     | 1.573  |
| A012499_01 | At3g18165     | expressed protein; protein id: At3g18165.1                                     | 0.418     | 0.09      | 0.286     | 0.085  |
| A012501_01 | At3g43510     | putative protein; protein id: At3g43510.1                                      | 0.269     | -0.071    | 0.17      | 0.539  |
| A012502_01 | At3g07870     | F-box protein family; protein id: At3g07870.1                                  | -1.81     | -1.785    | -1.18     | -1.559 |
| A012504_01 | At3g19770     | expressed protein; protein id: At3g19770.1                                     | -0.148    | -0.284 NA |           | -0.499 |
| A012513_01 | At3g54360     | RING finger - like protein; protein id: At3g54360.1                            | -0.859    | -0.989    | -0.437    | -0.248 |
| A012518_01 | At3g60570     | expansin family; protein id: At3g60570.1                                       | -0.62     | -0.565    | -0.939    | -1.081 |
| A012526_01 | At3g07770     | putative heat-shock protein; protein id: At3g07770.1                           | 1.123     | 0.952     | 0.892     | 1.196  |
| A012527_01 | At3g60370     | FKBP-type peptidyl-prolyl cis-trans isomerase; protein id: At3g60370.1         | NA        | NA        | 0.116     | -0.145 |
| A012532_01 | At3g19720     | hypothetical protein; protein id: At3g19720.1                                  | 0.689     | 0.577     | 0.195     | 0.309  |
| A012533_01 | At3g54760     | Putative protein; protein id: At3g54760.1                                      | 0.366     | -0.031 NA |           | 0.107  |
| A012537_01 | At3g54740     | putative protein; protein id: At3g54740.1                                      | 0.151     | -0.019    | -0.065    | 0.282  |
| A012543_01 | At3g19000     | expressed protein; protein id: At3g19000.1                                     | -0.619    | -0.586 NA |           | 0.14   |
| A012557_01 | At3g09100     | putative mRNA capping enzyme, RNA guanylyltransferase; protein id: At3g09100.1 | -0.253    | -0.571    | -0.458    | 0.034  |
| A012562_01 | At3g15420     | hypothetical protein; protein id: At3g15420.1                                  | -0.202    | -0.118    | 0.039     | -0.258 |
| A012563_01 | At3g15380     | expressed protein; protein id: At3g15380.1                                     | 0.128     | 0.027     | -0.118    | 0.018  |
| A012565_01 | At3g50360     | centrin; protein id: At3g50360.1                                               | -0.127    | 0.062     | 0.054     | -0.122 |
| A012566_01 | At3g11130     | putative clathrin heavy chain; protein id: At3g11130.1                         | 0.1       | 0.147     | 0.086     | 0.512  |
| A012567_01 | At3g55430     | glycosyl hydrolase family 17 (beta-1,3-glucanase); protein id: At3g55430.1     | -0.078    | -0.232    | -0.438    | -0.605 |
| A012572_01 | At3g06510     | glycosyl hydrolase family 1; protein id: At3g06510.1                           | -1.26     | -1.06     | -1.249    | -1.334 |
| A012577_01 | At3g60070     | putative protein; protein id: At3g60070.1                                      | -0.948 NA | NA        | NA        | NA     |
| A012578_01 | At3g25920     | 50S ribosomal protein L15, chloroplast precursor; protein id: At3g25920.1      | 1.203     | 0.943     | 0.247     | 0.55   |
| A012579_01 | At3g52400     | syntaxin SYP122; protein id: At3g52400.1                                       | NA        | NA        | -1.579 NA | NA     |
| A012580_01 | At3g12210     | expressed protein; protein id: At3g12210.1                                     | 0.099     | 0.388     | 0.209     | 0.277  |
| A012581_01 | At3g02550     | expressed protein; protein id: At3g02550.1                                     | 1.162     | 1.277     | 1.147     | 1.755  |
| A012585_01 | At3g59900     | putative protein; protein id: At3g59900.1                                      | -0.785    | -0.821    | 0.205     | 0.031  |
| A012587_01 | At3g59840     | expressed protein; protein id: At3g59840.1                                     | 0.304     | 0.592     | 0.583     | 0.338  |
| A012590_01 | At3g55280     | ribosomal L23a - like protein; protein id: At3g55280.1                         | 0.858     | 0.801     | 0.901     | 0.818  |
| A012591_01 | not annotated | mRNA for sterol-C5-desaturase (X90454 by NCBI)                                 | 0.21      | 0.238     | 0.324     | 0.519  |
| A012594_01 | At3g24820     | expressed protein; protein id: At3g24820.1                                     | -0.219    | -0.349 NA |           | 0.013  |

|            |           |                                                         |        |    |        |        |        |
|------------|-----------|---------------------------------------------------------|--------|----|--------|--------|--------|
| A012595_01 | At3g62640 | putative protein; protein id: At3g62640.1               | -0.676 | NA | NA     | NA     |        |
| A012597_01 | At3g54190 | putative protein; protein id: At3g54190.1               | -0.304 |    | -0.299 | -0.136 | 0.53   |
| A012604_01 | At3g55140 | pectate lyase -like protein; protein id: At3g55140.1    | 0.555  |    | 0.419  | 0.202  | 0.365  |
| A012607_01 | At3g57420 | putative protein; protein id: At3g57420.1               | -0.084 |    | -0.442 | NA     | -0.379 |
| A012618_01 | At3g29200 | chorismate mutase; protein id: At3g29200.1              | -0.65  |    | -0.622 | -0.16  | -0.311 |
| A012621_01 | At3g05830 | expressed protein; protein id: At3g05830.1              | 0.225  |    | -0.027 | NA     | 0.065  |
| A012623_01 | At3g19760 | eukaryotic translation initiation factor 4A (eIF-4A), p | -0.044 |    | -0.109 | -0.075 | 0.521  |
| A012625_01 | At3g10920 | manganese superoxide dismutase (MSD1); protein          | 0.621  |    | 0.425  | 0.441  | 0.066  |
| A012626_01 | At3g22160 | expressed protein; protein id: At3g22160.1              | NA     | NA | NA     | NA     |        |
| A012627_01 | At3g07940 | putative GTPase activating protein; protein id: At3g(   | -0.351 |    | -0.357 | -0.213 | -0.578 |
| A012628_01 | At3g62730 | putative protein; protein id: At3g62730.1               | NA     | NA | NA     | NA     |        |
| A012631_01 | At3g45590 | putative protein; protein id: At3g45590.1               | -0.438 | NA | NA     | NA     |        |
| A012633_01 | At3g16870 | GATA zinc finger protein; protein id: At3g16870.1       | 0.028  |    | 0.221  | 0.705  | 0.682  |
| A012637_01 | At3g46830 | GTP-binding protein, putative; protein id: At3g46830    | -0.172 |    | -0.15  | 0.068  | -0.071 |
| A012640_01 | At3g54470 | similar to UMP synthase {Arabidopsis thaliana}; pro     | 0.772  |    | 1.155  | 0.981  | 1.262  |
| A012641_01 | At3g25660 | glutamyl-tRNA amidotransferase subunit A, putative      | 0.761  |    | 0.733  | 0.286  | 0.73   |
| A012646_01 | At3g44670 | disease resistance protein RPP1-Ws(A,C)-like (TIR       | -0.915 |    | -1.234 | -0.745 | -0.686 |
| A012647_01 | At3g16400 | putative lectin; protein id: At3g16400.1                | 1.171  | NA |        | 0.349  | 0.183  |
| A012648_01 | At3g13227 | hypothetical protein; protein id: At3g13227.1           | -0.546 |    | -0.124 | -0.146 | -0.595 |
| A012649_01 | At3g03640 | glycosyl hydrolase family 1; protein id: At3g03640.1    | 0.801  |    | 0.54   | 0.281  | -0.212 |
| A012650_01 | At3g01390 | vacuolar membrane ATPase subunit G (AVMA10);            | 0.169  |    | 0.512  | 0.112  | -0.079 |
| A012651_01 | At3g58490 | putative protein; protein id: At3g58490.1               | -0.82  |    | -0.76  | -0.655 | -1.069 |
| A012653_01 | At3g57610 | adenylosuccinate synthetase; protein id: At3g57610      | 0.3    |    | 0.331  | 0.249  | 0.451  |
| A012654_01 | At3g23940 | dihydroxyacid dehydratase, putative; protein id: At3g   | 1.413  |    | 1.132  | 0.996  | 1.347  |
| A012655_01 | At3g23970 | hypothetical protein; protein id: At3g23970.1           | -2.145 |    | -1.852 | -1.242 | -2.063 |
| A012657_01 | At3g19970 | expressed protein; protein id: At3g19970.1              | -0.12  |    | -0.221 | 0.145  | 0.446  |
| A012660_01 | At3g24040 | hypothetical protein; protein id: At3g24040.1           | 0.752  |    | 0.713  | 0.726  | 0.759  |
| A012664_01 | At3g57090 | expressed protein; protein id: At3g57090.1              | -0.422 |    | -0.467 | -0.04  | -0.428 |
| A012665_01 | At3g62880 | putative protein; protein id: At3g62880.1               | -0.666 | NA | NA     |        | -0.889 |
| A012672_01 | At3g52800 | zinc finger - like protein; protein id: At3g52800.1     | -2.046 |    | -1.859 | -1.001 | -1.262 |
| A012678_01 | At3g15510 | putative jasmonic acid regulatory protein; protein id:  | -3.217 | NA |        | -1.942 | -3.584 |
| A012680_01 | At3g45100 | N-acetylglucosaminyl-phosphatidylinositol-like prote    | 0.482  | NA |        | 0.104  | 0.073  |
| A012685_01 | At3g50830 | putative cold acclimation protein; protein id: At3g508  | -1.167 |    | -0.977 | -0.685 | -1.163 |
| A012694_01 | At3g26580 | unknown protein; protein id: At3g26580.1                | -1.046 |    | -1.62  | -1.214 | -1.77  |
| A012695_01 | At3g62260 | protein phosphatase 2C (PP2C); protein id: At3g622      | -1.96  |    | -1.977 | -0.715 | -1.36  |
| A012696_01 | At3g26800 | hypothetical protein; protein id: At3g26800.1           | -0.064 |    | 0.096  | 0.524  | 0.911  |
| A012697_01 | At3g62190 | putative protein; protein id: At3g62190.1               | -0.889 |    | -0.662 | -0.44  | -0.705 |
| A012700_01 | At3g52500 | expressed protein; protein id: At3g52500.1              | 1.324  |    | 1.146  | 0.915  | 1.285  |
| A012704_01 | At3g58970 | putative protein; protein id: At3g58970.1               | -0.434 | NA | NA     |        | -0.706 |
| A012705_01 | At3g52240 | hypothetical protein; protein id: At3g52240.1           | -0.655 | NA |        | -0.394 | -0.93  |
| A012706_01 | At3g29090 | pectinesterase family; protein id: At3g29090.1          | 0.121  |    | -0.11  | 0.267  | 0.211  |
| A012707_01 | At3g51000 | epoxide hydrolase-like protein; protein id: At3g5100    | -0.832 |    | -1.131 | -0.644 | -1.158 |
| A012710_01 | At3g29130 | hypothetical protein; protein id: At3g29130.1           | -0.269 | NA |        | 0.359  | 0.214  |
| A012712_01 | At3g62130 | putative protein; protein id: At3g62130.1               | -0.304 | NA |        | -0.514 | -0.626 |
| A012714_01 | At3g29170 | expressed protein; protein id: At3g29170.1              | -1.019 |    | -1.008 | -0.072 | -0.97  |
| A012715_01 | At3g47670 | putative protein; protein id: At3g47670.1               | -0.357 | NA | NA     |        | -0.64  |
| A012722_01 | At3g53410 | putative protein; protein id: At3g53410.1               | -0.385 |    | -0.684 | NA     | -0.891 |
| A012723_01 | At3g16140 | photosystem I subunit VI precursor; protein id: At3g    | 0.332  |    | -0.393 | -0.196 | 0.021  |
| A012724_01 | At3g53350 | putative protein; protein id: At3g53350.1               | -0.529 |    | -1.109 | NA     | -0.6   |
| A012726_01 | At3g46100 | histidyl-tRNA synthetase; protein id: At3g46100.1       | 0.381  |    | 0.132  | 0.088  | -0.089 |
| A012728_01 | At3g59050 | putative protein; protein id: At3g59050.1               | -0.671 |    | -0.654 | -0.234 | -0.152 |
| A012730_01 | At3g60320 | bZIP protein; protein id: At3g60320.1                   | 0.284  |    | 0.289  | -0.065 | -0.102 |
| A012732_01 | At3g06810 | acetyl-coA dehydrogenase, putative; protein id: At3g    | -1.622 |    | -1.508 | -1.26  | -0.866 |
| A012738_01 | At3g26890 | expressed protein; protein id: At3g26890.1              | -0.733 |    | -1.02  | -0.867 | -0.857 |
| A012739_01 | At3g57300 | helicase-like protein; protein id: At3g57300.1          | -0.548 |    | -0.835 | -0.329 | -0.49  |
| A012741_01 | At3g10500 | expressed protein; protein id: At3g10500.1              | -1.456 |    | -1.396 | -1.143 | -0.936 |
| A012745_01 | At3g14400 | ubiquitin-specific protease 25 (UBP25); protein id: A   | -0.133 |    | -0.133 | -0.147 | -0.089 |
| A012747_01 | At3g15450 | expressed protein; protein id: At3g15450.1              | -1.581 |    | -1.701 | -0.502 | -0.41  |
| A012748_01 | At3g48580 | xyloglucan endotransglycosylase, putative; protein i    | -0.905 |    | -1.173 | 0.659  | 0.685  |
| A012749_01 | At3g59060 | putative protein; protein id: At3g59060.1               | -2.447 |    | -2.392 | -1.39  | -2.114 |
| A012752_01 | At3g54090 | fructokinase - like protein; protein id: At3g54090.1    | 1.298  |    | 1.35   | 0.738  | 1.098  |
| A012754_01 | At3g13750 | glycosyl hydrolase family 35 (beta-galactosidase); p    | -2.294 |    | -2.301 | -1.504 | -1.943 |
| A012758_01 | At3g16270 | expressed protein; protein id: At3g16270.1              | 0.108  |    | -0.424 | -0.399 | -0.878 |
| A012760_01 | At3g54170 | FKBP12 interacting protein (FIP37); protein id: At3g    | 0.359  |    | 0.246  | 0.16   | 0.285  |
| A012762_01 | At3g56210 | hypothetical protein; protein id: At3g56210.1           | 0.445  |    | 0.305  | NA     | 0.49   |
| A012767_01 | At3g54290 | expressed protein; protein id: At3g54290.1              | -0.633 |    | -0.33  | NA     | 0.177  |
| A012768_01 | At3g54300 | synaptobrevin -like protein; protein id: At3g54300.1    | -0.185 |    | -0.335 | 0.015  | -0.191 |
| A012769_01 | At3g24550 | protein kinase, putative; protein id: At3g24550.1       | 0.16   |    | 0.185  | -0.091 | 0.436  |



|            |           |                                                                    |        |    |        |        |
|------------|-----------|--------------------------------------------------------------------|--------|----|--------|--------|
| A012770_01 | At3g55980 | putative protein; protein id: At3g55980.1                          | -1.049 | NA | -0.804 | -1.571 |
| A012771_01 | At3g58750 | citrate synthase -like protein; protein id: At3g58750.             | -0.644 |    | -1.017 | -0.99  |
| A012772_01 | At3g26720 | glycosyl hydrolase family 38 (alpha-mannosidase); j                | 0.05   |    | 0.101  | -0.302 |
| A012773_01 | At3g18080 | glycosyl hydrolase family 1; protein id: At3g18080.1               | 1.43   |    | 0.992  | 0.252  |
| A012776_01 | At3g48610 | putative protein; protein id: At3g48610.1                          | 0.854  |    | 0.76   | 0.765  |
| A012778_01 | At3g53260 | phenylalanine ammonia-lyase; protein id: At3g5326                  | -0.154 |    | -0.462 | -0.405 |
| A012781_01 | At3g46590 | telomere repeat-binding protein homolog; protein id:               | -0.623 |    | -0.567 | NA     |
| A012787_01 | At3g26570 | phosphate transporter, putative; protein id: At3g265               | 0.039  |    | -0.057 | 0.134  |
| A012788_01 | At3g52380 | chloroplast RNA-binding protein cp33; protein id: At               | 0.749  |    | 0.359  | 0.079  |
| A012791_01 | At3g02450 | cell division protein FtsH-like protein; protein id: At3           | -0.129 | NA |        | NA     |
| A012796_01 | At3g61820 | putative protein; protein id: At3g61820.1                          | 1.269  |    | 1.369  | 1.039  |
| A012797_01 | At3g27110 | expressed protein; protein id: At3g27110.1                         | -2.039 | NA |        | -1.254 |
| A012800_01 | At3g61600 | putative protein; protein id: At3g61600.1                          | -0.248 |    | -0.15  | -0.138 |
| A012807_01 | At3g63030 | putative protein; protein id: At3g63030.1                          | -0.233 |    | -0.2   | 0.406  |
| A012810_01 | At3g56240 | copper homeostasis factor; protein id: At3g56240.1                 | -2.965 |    | -3.08  | -1.259 |
| A012811_01 | At3g11670 | digalactosyldiacylglycerol synthase; protein id: At3g              | -0.654 |    | -0.812 | -0.441 |
| A012812_01 | At3g47950 | H <sup>+</sup> -transporting ATPase - like protein; protein id: At | -2.776 |    | -2.878 | NA     |
| A012813_01 | At3g19820 | cell elongation protein, Dwarf1; protein id: At3g1982              | 1.183  |    | 1.073  | 0.772  |
| A012816_01 | At3g13580 | ribosomal protein, putative; protein id: At3g13580.1               | 0.541  |    | 0.386  | NA     |
| A012817_01 | At3g51630 | MAP kinase; protein id: At3g51630.1                                | -0.139 |    | -0.273 | 0.014  |
| A012818_01 | At3g63140 | mRNA binding protein precursor - like; protein id: At              | 0.457  |    | 0.359  | -0.212 |
| A012822_01 | At3g47620 | putative protein; protein id: At3g47620.1                          | -0.26  |    | 0.105  | -0.231 |
| A012823_01 | At3g54350 | putative protein; protein id: At3g54350.1                          | 0.103  | NA |        | NA     |
| A012826_01 | At3g52990 | pyruvate kinase - like protein; protein id: At3g52990              | 0.266  |    | 0.345  | -0.029 |
| A012828_01 | At3g55800 | sedoheptulose-bisphosphatase precursor; protein ic                 | 0.026  |    | -0.145 | 0.025  |
| A012829_01 | At3g53670 | putative protein; protein id: At3g53670.1                          | 0.379  |    | 0.333  | 0.304  |
| A012830_01 | At4g16143 | expressed protein; protein id: At4g16143.1                         | 0.037  |    | 0.084  | -0.158 |
| A012832_01 | At3g52920 | putative protein; protein id: At3g52920.1                          | -0.414 |    | -0.404 | 0.175  |
| A012834_01 | At3g53580 | diaminopimelate epimerase - like protein; protein id:              | 0.71   | NA |        | 0.609  |
| A012835_01 | At3g17510 | expressed protein; protein id: At3g17510.1                         | -0.617 |    | -0.626 | -1.137 |
| A012837_01 | At3g53340 | transcription factor NF-Y, CCAAT-binding - like prot               | 0.155  |    | 0.412  | 0.466  |
| A012838_01 | At3g47160 | RNA-binding protein-like protein; protein id: At3g471              | -1.044 |    | -1.283 | -1.336 |
| A012839_01 | At3g08860 | putative aminotransferase; protein id: At3g08860.1                 | -2.696 |    | -2.975 | NA     |
| A012841_01 | At3g18890 | hypothetical protein; protein id: At3g18890.1                      | 0.389  | NA |        | NA     |
| A012844_01 | At3g04920 | putative ribosomal protein s19 or s24; protein id: At              | 0.669  |    | 0.701  | 0.714  |
| A012846_01 | At3g48710 | putative protein; protein id: At3g48710.1                          | 0.183  |    | -0.374 | NA     |
| A012847_01 | At3g15810 | expressed protein; protein id: At3g15810.1                         | -1.792 |    | -1.782 | -1.128 |
| A012849_01 | At3g42050 | vacuolar H(+)-ATPase subunit-like protein; protein id:             | 0.105  |    | -0.174 | -0.112 |
| A012854_01 | At4g26400 | putative protein; protein id: At4g26400.1                          | -0.166 |    | -0.211 | -0.466 |
| A012858_01 | At4g39540 | shikimate kinase - like protein; protein id: At4g39540             | 0.227  | NA |        | NA     |
| A012860_01 | At4g37930 | glycine hydroxymethyltransferase like protein; prote               | -1.19  |    | -1.467 | -1.274 |
| A012862_01 | At4g26900 | glutamine amidotransferase/cyclase; protein id: At4                | 0.897  |    | 0.808  | 0.542  |
| A012865_01 | At4g19420 | pectinacetyltransferase family; protein id: At4g19420.1            | -3.8   |    | -4.39  | -3.178 |
| A012872_01 | At4g23990 | cellulose synthase catalytic subunit - like protein; pr            | -1.793 |    | -1.593 | -1.262 |
| A012878_01 | At4g14340 | casein kinase I; protein id: At4g14340.1                           | -0.141 |    | -0.077 | NA     |
| A012880_01 | At4g11650 | osmotin precursor; protein id: At4g11650.1                         | -1.954 | NA |        | NA     |
| A012881_01 | xxxx      | A.t. DNA chromosome 3, BAC clone F27K19                            | 0.226  |    | 0.245  | 0.057  |
| A012883_01 | At4g37870 | phosphoenolpyruvate carboxykinase (ATP) -like pro                  | 0.735  |    | 0.653  | 0.67   |
| A012885_01 | At4g02980 | auxin-binding protein 1 precursor; protein id: At4g02              | 0.204  |    | 0.375  | -0.278 |
| A012887_01 | At4g28830 | putative protein; protein id: At4g28830.1                          | 0.15   |    | 0.433  | 0.267  |
| A012888_01 | At4g15550 | glucosyltransferase like protein; protein id: At4g1555             | -1.665 |    | -1.994 | -0.746 |
| A012889_01 | At4g13540 | putative protein; protein id: At4g13540.1                          | 0.316  |    | 0.037  | 0.791  |
| A012890_01 | At4g08900 | arginase; protein id: At4g08900.1                                  | -0.867 |    | -0.415 | -0.356 |
| A012893_01 | At4g27140 | NWMU1 - 2S albumin 1 precursor; protein id: At4g2                  | -2.685 | NA |        | -1.641 |
| A012895_01 | At4g29010 | AIM1 protein; protein id: At4g29010.1                              | -0.389 |    | -0.616 | -0.484 |
| A012896_01 | At4g25210 | putative protein; protein id: At4g25210.1                          | 0.56   |    | 0.27   | 0.428  |
| A012897_01 | At4g18930 | putative protein; protein id: At4g18930.1                          | -0.534 |    | -0.36  | -0.375 |
| A012899_01 | At4g09800 | S18.A ribosomal protein; protein id: At4g09800.1                   | 0.44   |    | 0.577  | 0.592  |
| A012907_01 | At4g20960 | putative protein; protein id: At4g20960.1                          | 0.626  | NA |        | 0.487  |
| A012913_01 | At4g13520 | expressed protein; protein id: At4g13520.1                         | 0.526  |    | 0.43   | 0.134  |
| A012917_01 | At4g34820 | putative protein; protein id: At4g34820.1                          | 0.125  | NA |        | -0.316 |
| A012919_01 | At4g32020 | putative protein; protein id: At4g32020.1                          | -0.995 |    | -1.466 | -0.983 |
| A012921_01 | At4g28740 | expressed protein; protein id: At4g28740.1                         | -0.479 |    | -0.416 | -0.351 |
| A012930_01 | At4g22740 | expressed protein; protein id: At4g22740.1                         | -0.524 |    | -0.395 | -0.112 |
| A012932_01 | At5g46860 | syntaxin SYP22 (VAM3); protein id: At5g46860.1                     | 0.033  |    | 0.06   | NA     |
| A012934_01 | At4g08920 | Arabidopsis thaliana flavin-type blue-light photorece              | -1.566 |    | -1.604 | -1.189 |
| A012936_01 | At4g34340 | expressed protein; protein id: At4g34340.1                         | -0.178 |    | 0.036  | NA     |
| A012937_01 | At4g32180 | putative protein; protein id: At4g32180.1                          | -0.314 |    | -0.312 | -0.219 |

|            |           |                                                          |           |           |        |        |
|------------|-----------|----------------------------------------------------------|-----------|-----------|--------|--------|
| A012940_01 | At4g10060 | putative protein; protein id: At4g10060.1                | -2.115    | -1.942    | -1.51  | -1.281 |
| A012944_01 | At4g32070 | putative protein; protein id: At4g32070.1                | -0.927    | -1.118 NA |        | -1.003 |
| A012946_01 | At4g00370 | hypothetical protein; protein id: At4g00370.1            | -0.087 NA |           | -0.115 | 0.136  |
| A012951_01 | At4g16110 | hypothetical protein; protein id: At4g16110.1            | -1.275 NA | NA        | NA     |        |
| A012958_01 | At4g20010 | expressed protein; protein id: At4g20010.1               | 0.544     | 0.527     | 0.076  | 0.276  |
| A012959_01 | At4g14710 | expressed protein; protein id: At4g14710.1               | -0.654    | -1.312    | -0.617 | -0.907 |
| A012960_01 | At4g20030 | RRM-containing protein; protein id: At4g20030.1          | -0.036    | 0.296     | 0.259  | 0.091  |
| A012964_01 | At4g19510 | disease resistance protein (TIR-NBS-LRR class), p        | -0.76     | -0.894 NA |        | -1.249 |
| A012966_01 | At4g20070 | hyuC-like protein; protein id: At4g20070.1               | -1.372    | -1.385 NA |        | -1.147 |
| A012972_01 | At4g10040 | cytochrome c; protein id: At4g10040.1                    | -0.375 NA |           | 0.238  | -0.326 |
| A012977_01 | At4g32910 | putative protein; protein id: At4g32910.1                | -0.104    | 0.133     | 0.196  | 0.727  |
| A012978_01 | At4g35920 | putative protein; protein id: At4g35920.1                | 0.263     | 0.304     | 0.379  | 1.035  |
| A012982_01 | At4g28550 | putative protein; protein id: At4g28550.1                | 0.138     | 0.093 NA  |        | 0.766  |
| A012986_01 | At4g28085 | expressed protein; protein id: At4g28085.1               | -2.746    | -2.687    | -1.541 | -2.936 |
| A012989_01 | At4g25030 | putative protein; protein id: At4g25030.1                | -0.293    | -0.538    | -0.35  | -0.313 |
| A012995_01 | At4g37510 | putative protein; protein id: At4g37510.1                | -0.063 NA |           | -0.133 | -0.06  |
| A013000_01 | At4g34350 | putative protein; protein id: At4g34350.1                | -1.442    | -2.078    | -1.52  | -1.098 |
| A013003_01 | At4g36540 | putative protein; protein id: At4g36540.1                | -0.166 NA |           | 0.246  | -0.033 |
| A013004_01 | At4g18580 | expressed protein; protein id: At4g18580.1               | -1.175    | -1.082    | -0.74  | -1.08  |
| A013011_01 | At4g08230 | hypothetical protein; protein id: At4g08230.1            | -0.965    | -0.281    | -0.216 | -0.58  |
| A013012_01 | At4g27310 | CONSTANS B-box zinc finger family protein; proteir       | -0.804    | -0.502    | -0.49  | -0.961 |
| A013018_01 | At4g27600 | carbohydrate kinase - like protein; protein id: At4g27   | 0.207     | 0.022     | -0.343 | -0.023 |
| A013019_01 | At4g13350 | putative protein; protein id: At4g13350.1                | -0.298    | -0.207    | -0.504 | -0.37  |
| A013022_01 | At4g08220 | putative protein; protein id: At4g08220.1                | -0.115    | -0.252    | 0.078  | 0.153  |
| A013026_01 | At4g19090 | hypothetical protein; protein id: At4g19090.1            | -0.165    | -0.342    | 0.032  | -0.065 |
| A013029_01 | At4g31030 | putative protein; protein id: At4g31030.1                | -0.271    | 0.165     | -0.705 | -0.034 |
| A013032_01 | At4g24020 | putative protein; protein id: At4g24020.1                | -0.902    | -0.606    | -1.127 | -0.992 |
| A013034_01 | At4g10910 | expressed protein; protein id: At4g10910.1               | -1.566 NA | NA        |        | -0.757 |
| A013035_01 | At4g18160 | potassium channel - like protein; protein id: At4g181    | -0.766    | -0.807    | -0.464 | -0.58  |
| A013036_01 | At4g38430 | putative protein; protein id: At4g38430.1                | 0.483     | 0.808     | 0.485  | 0.456  |
| A013038_01 | At4g04340 | unknown protein; protein id: At4g04340.1                 | -0.323 NA | NA        |        | 0.175  |
| A013040_01 | At4g30780 | putative protein; protein id: At4g30780.1                | -0.242    | -0.587    | -0.542 | -0.517 |
| A013044_01 | At4g23890 | putative protein; protein id: At4g23890.1                | -0.853    | -1.386    | -0.841 | -1.506 |
| A013046_01 | At4g21560 | putative protein; protein id: At4g21560.1                | -0.917    | -0.884    | -0.352 | -0.807 |
| A013047_01 | At4g35630 | phosphoserine aminotransferase; protein id: At4g35       | 0.6       | 0.553     | 0.538  | 1.212  |
| A013050_01 | At4g01026 | expressed protein; protein id: At4g01026.1               | -0.552    | -1.112    | -0.971 | -0.988 |
| A013051_01 | At4g08850 | receptor protein kinase-like protein; protein id: At4g   | -1.795 NA | NA        | NA     |        |
| A013053_01 | At4g01690 | protoporphyrinogen oxidase; protein id: At4g01690.       | 0.397     | 0.233     | 0.028  | 0.428  |
| A013055_01 | At4g25870 | putative protein; protein id: At4g25870.1                | 0.356     | 0.446     | 0.418  | 0.927  |
| A013058_01 | At4g24940 | ubiquitin activating enzyme - like protein; protein id:  | 0.572     | 0.603     | 0.392  | 0.789  |
| A013062_01 | At4g18120 | meiosis protein mei2-related; protein id: At4g18120.     | -0.498 NA | NA        |        | 0.003  |
| A013063_01 | At4g18530 | putative protein; protein id: At4g18530.1                | -1.081    | -0.657 NA |        | -0.553 |
| A013065_01 | At4g22360 | putative protein; protein id: At4g22360.1                | -0.36     | -0.646    | -0.424 | -0.332 |
| A013067_01 | At4g38500 | putative protein; protein id: At4g38500.1                | 0.18      | 0.206 NA  |        | 0.207  |
| A013073_01 | At4g11940 | putative protein; protein id: At4g11940.1                | -0.599    | -0.757    | -0.259 | 0.019  |
| A013074_01 | At4g35940 | putative protein; protein id: At4g35940.1                | -0.765 NA |           | -0.743 | -0.408 |
| A013075_01 | At4g14520 | hypothetical protein; protein id: At4g14520.1            | -0.574 NA | NA        |        | -0.193 |
| A013086_01 | At4g21580 | putative NADPH quinone oxidoreductase; protein id        | -0.999    | -1.245    | -0.639 | -0.849 |
| A013087_01 | At4g22670 | HSP associated protein like; protein id: At4g22670.      | 0.721     | 0.615     | 0.057  | 0.449  |
| A013088_01 | At4g18240 | starch synthase-related protein; protein id: At4g182.    | -0.088 NA |           | -0.728 | -0.928 |
| A013090_01 | At4g26130 | uncharacterized protein; protein id: At4g26130.1         | 0.116     | 0.144     | -0.333 | -1.346 |
| A013093_01 | At4g35980 | expressed protein; protein id: At4g35980.1               | 0.102     | 0.351     | 0.44   | 0.011  |
| A013095_01 | At4g02520 | glutathione transferase, putative; protein id: At4g02    | -3.37     | -3.984    | -1.808 | -2.334 |
| A013098_01 | At4g39890 | GTP-binding protein, putative; protein id: At4g39890     | 0.115     | 0.281     | -0.305 | 0.222  |
| A013105_01 | At4g38260 | putative protein; protein id: At4g38260.1                | -0.539 NA | NA        |        | -0.82  |
| A013107_01 | At4g12980 | putative protein; protein id: At4g12980.1                | -1.017    | -0.987    | -0.759 | -1.302 |
| A013109_01 | At4g36030 | A.t. DNA chromosome 4, BAC clone T13J8 (ESSAI            | -0.563    | -0.929    | -0.571 | -1.086 |
| A013111_01 | At4g08350 | putative protein; protein id: At4g08350.1                | -0.127    | 0.073     | 0.137  | 0.18   |
| A013112_01 | At4g08330 | putative protein; protein id: At4g08330.1                | -0.41     | -0.311    | -0.486 | -0.731 |
| A013118_01 | At4g38280 | putative protein; protein id: At4g38280.1                | -0.457    | -0.373    | -0.285 | -0.467 |
| A013119_01 | At4g31700 | ribosomal protein S6 - like; protein id: At4g31700.1     | 1.015     | 0.721     | 0.716  | 1.397  |
| A013129_01 | At4g25640 | putative protein; protein id: At4g25640.1                | -0.624    | -0.795    | -0.245 | -0.437 |
| A013130_01 | At4g33525 | metal-transporting P-type ATPase; protein id: At4g3      | 0.45      | 0.103 NA  | NA     |        |
| A013142_01 | At4g24120 | putative protein; protein id: At4g24120.1                | -1.679    | -1.656    | -1.053 | -1.04  |
| A013143_01 | At4g36690 | splicing factor U2AF 65 kDa subunit, putative; prote     | -0.064    | -0.347    | -0.255 | -0.071 |
| A013154_01 | At4g36230 | putative glycine-rich cell wall protein; protein id: At4 | 0.232     | 0.193     | 0.255  | 0.119  |
| A013156_01 | At4g21620 | putative protein; protein id: At4g21620.1                | -0.025    | 0.366     | 0.215  | -0.392 |
| A013164_01 | At4g16720 | ribosomal protein; protein id: At4g16720.1               | 0.342     | 0.456     | 0.628  | 1      |

|            |               |                                                           |           |           |           |        |
|------------|---------------|-----------------------------------------------------------|-----------|-----------|-----------|--------|
| A013188_01 | At4g08950     | putative phi-1-like phosphate-induced protein; prote      | 0.608     | 0.833     | 0.13      | 0.509  |
| A013192_01 | At4g32640     | putative protein; protein id: At4g32640.1                 | -0.337    | 0.151     | 0.113     | -0.383 |
| A013196_01 | At4g02230     | putative ribosomal protein L19; protein id: At4g0223      | 0.519     | 0.408     | 0.556     | 0.497  |
| A013212_01 | At4g15490     | UDP-glycosyltransferase, putative; protein id: At4g1      | -2.433 NA | NA        | NA        |        |
| A013215_01 | At4g34240     | putative aldehyde dehydrogenase; protein id: At4g3        | -0.256 NA |           | -0.151    | 0.124  |
| A013219_01 | At4g38270     | putative protein; protein id: At4g38270.1                 | -0.28     | 0.057 NA  |           | 0.449  |
| A013223_01 | At4g34270     | putative protein; protein id: At4g34270.1                 | -0.264    | -0.185    | -0.306    | -0.376 |
| A013227_01 | At4g31530     | putative protein; protein id: At4g31530.1                 | -0.229    | -0.152    | -0.481    | -0.393 |
| A013238_01 | At4g27160     | NWMU3 - 2S albumin 3 precursor; protein id: At4g2         | -3.222    | -3.217    | -1.314    | -3.174 |
| A013240_01 | At4g10920     | putative protein; protein id: At4g10920.1                 | -1.368    | -1.778    | -1.51     | -1.622 |
| A013244_01 | At4g35220     | putative protein; protein id: At4g35220.1                 | 0.292     | 0.154     | 0.235     | 0.375  |
| A013246_01 | At4g25890     | putative acidic ribosomal protein; protein id: At4g25     | 0.93      | 1.092     | 1.028     | 0.942  |
| A013249_01 | At4g21810     | putative protein; protein id: At4g21810.1                 | -1.093    | -0.857    | -0.207    | -0.541 |
| A013260_01 | At4g10330     | hypothetical protein; protein id: At4g10330.1             | -0.445    | -0.307 NA |           | -1.387 |
| A013266_01 | At4g13020     | serine/threonine-specific protein kinase MHK; protei      | -0.416    | -0.755    | -0.572    | -0.518 |
| A013268_01 | At4g33300     | disease resistance protein (CC-NBS-LRR class), pu         | -0.877    | -0.878    | -0.777    | -0.701 |
| A013270_01 | At4g36210     | putative protein; protein id: At4g36210.1                 | -0.568    | -0.938    | -0.614    | -0.628 |
| A013277_01 | At4g22890     | putative protein; protein id: At4g22890.1                 | -0.645    | -0.352    | -0.751    | -0.844 |
| A013278_01 | At4g27680     | putative protein; protein id: At4g27680.1                 | -0.184    | -0.362    | -0.291    | -0.165 |
| A013281_01 | At4g22930     | dihydroorotase; protein id: At4g22930.1                   | 0.638     | 0.744     | 0.353     | 0.67   |
| A013282_01 | At4g27500     | proton pump interactor; protein id: At4g27500.1           | 0.432     | 0.089     | 0         | 0.059  |
| A013287_01 | At4g22990     | putative protein; protein id: At4g22990.1                 | -0.084    | -0.281    | -0.738    | -0.775 |
| A013299_01 | At4g39880     | putative protein; protein id: At4g39880.1                 | 0.893     | 0.705     | 0.736     | 0.54   |
| A013356_01 | At4g26100     | putative Col-0 casein kinase I                            | 0.09      | 0.249     | 0.176     | 0.445  |
| A013397_01 | At4g28080     | putative protein; protein id: At4g28080.1                 | -0.266    | -0.375    | -0.43     | -0.444 |
| A013402_01 | At4g32300     | S-receptor kinase -like protein; protein id: At4g3230 NA  | NA        | NA        | NA        |        |
| A013406_01 | At4g24810     | putative protein; protein id: At4g24810.1                 | -0.325 NA |           | -0.558    | -0.629 |
| A013408_01 | At4g37880     | putative protein; protein id: At4g37880.1                 | -0.584    | -0.444    | -0.266    | -0.197 |
| A013412_01 | At4g35490     | ribosomal protein L11 homolog; protein id: At4g354        | 0.587     | 0.61      | 0.652     | 0.337  |
| A013413_01 | At4g13910     | putative disease resistance protein; protein id: At4g NA  | NA        | NA        | NA        |        |
| A013414_01 | At4g13590     | putative protein; protein id: At4g13590.1                 | 0.056     | -0.026    | 0.053     | 0.069  |
| A013416_01 | At4g37910     | glycine hydroxymethyltransferase-like protein             | 0.992     | 0.879     | 0.852     | 1      |
| A013417_01 | At4g32480     | putative protein; protein id: At4g32480.1                 | -0.927    | -1.226    | -0.322    | -0.413 |
| A013419_01 | At4g24620     | glucose-6-phosphate isomerase; protein id: At4g24         | 0.614     | 0.431     | 0.159     | 0.529  |
| A013420_01 | At4g32510     | putative protein; protein id: At4g32510.1 NA              | NA        | NA        | NA        |        |
| A013421_01 | At4g32520     | glycine hydroxymethyltransferase (EC 2.1.2.1)-likere      | 0.401     | 0.251     | 0.29      | 0.783  |
| A013423_01 | At4g02640     | bZIP protein; protein id: At4g02640.2                     | -0.075    | -0.533    | 0.039     | 0.337  |
| A013428_01 | At4g01290     | hypothetical protein; protein id: At4g01290.1             | -0.125    | -0.366 NA |           | -0.26  |
| A013429_01 | At4g01330     | putative protein kinase; protein id: At4g01330.1          | -0.48     | -0.792    | -0.75     | -0.813 |
| A013435_01 | At4g01600     | putative ABA-reponsive protein; protein id: At4g01        | -2.238 NA |           | -1.239 NA |        |
| A013440_01 | At4g01960     | PITSLRE protein kinase family; protein id: At4g019        | -0.089 NA |           | -0.032    | -0.143 |
| A013447_01 | At4g02410     | contains similarity to a protein kinase domain (Pfam NA   | NA        | NA        | NA        |        |
| A013461_01 | At4g03140     | putative alcohol dehydrogenase; protein id: At4g031       | -0.316    | -0.442 NA |           | -0.236 |
| A013462_01 | At4g03200     | unknown protein; protein id: At4g03200.1                  | -0.066 NA |           | NA        | 0.112  |
| A013463_01 | At4g03240     | putative frataxin-like protein; protein id: At4g03240.1   | 0.009     | 0.241 NA  |           | NA     |
| A013467_01 | At4g03400     | putative GH3-like protein; protein id: At4g03400.1        | -0.645    | -0.663    | -0.663    | -1.316 |
| A013468_01 | At4g03410     | hypothetical protein; protein id: At4g03410.1             | -1.537 NA |           | -1.182    | -1.917 |
| A013469_01 | At4g03430     | putative pre-mRNA splicing factor; protein id: At4g0      | -0.349    | -0.404    | -0.391    | -0.729 |
| A013470_01 | At4g03560     | putative calcium channel; protein id: At4g03560.1         | -1.473    | -1.633    | -1.998    | -2.294 |
| A013475_01 | At4g03960     | putative protein; protein id: At4g03960.1                 | 0.413     | 0.205     | 0.794     | 0.986  |
| A013477_01 | At4g04200     | hypothetical protein; protein id: At4g04200.1             | 0.535     | 0.603     | 0.149     | 0.038  |
| A013479_01 | At4g04320     | putative malonyl-CoA decarboxylase; protein id: At4       | -0.196    | -0.062    | -0.079    | 0.545  |
| A013487_01 | At4g04880     | putative adenosine deaminase; protein id: At4g048         | -0.368 NA |           | -0.538    | -0.488 |
| A013488_01 | At4g04890     | homeodomain protein, Protodermal factor2 (PDF2);          | 0.718     | 0.732     | 0.582     | 0.678  |
| A013490_01 | At4g04920     | hypothetical protein; protein id: At4g04920.1             | -0.316    | -0.743 NA |           | -0.375 |
| A013498_01 | At4g05460     | F-box protein family, AtFBL20; protein id: At4g0546       | -0.205 NA |           | 0.122     | 0.368  |
| A013503_01 | At4g07390     | coded for by A. thaliana cDNA N64969; protein id: F       | -0.043    | 0.041     | 0.34      | 0.459  |
| A013510_01 | At4g07960     | putative glucosyltransferase; protein id: At4g07960.      | -0.129    | -0.381 NA |           | NA     |
| A013518_01 | At4g08810     | putative protein; protein id: At4g08810.1                 | 0.687     | 0.158     | 0.085     | 0.268  |
| A013519_01 | At4g08870     | putative arginase; protein id: At4g08870.1                | 0.782     | 0.674     | -0.564    | 0.226  |
| A013520_01 | At4g08930     | putative protein disulfide isomerase; protein id: At4g NA | NA        |           | -0.803    | -1.3   |
| A013522_01 | At4g09040     | RRM-containing protein; protein id: At4g09040.1           | 0.72      | 0.61      | 0.228     | 0.355  |
| A013534_01 | At4g13980     | expressed protein; protein id: At4g13980.1                | -0.257    | -0.352    | -0.576    | -0.656 |
| A013535_01 | At4g14020     | expressed protein; protein id: At4g14020.1                | -4.08     | -4.153    | -2.102    | -3.705 |
| A013537_01 | At4g14270     | expressed protein; protein id: At4g14270.1                | -1.33     | -1.315    | -0.702    | -1.5   |
| A013547_01 | At4g14890     | ferredoxin; protein id: At4g14890.1                       | 0.099     | 0.152     | 0.116     | -0.702 |
| A013548_01 | At4g15010     | mitochondrial carrier protein family; protein id: At4g    | 0.348 NA  |           | 0.236     | 0.496  |
| A013554_01 | not annotated | Chr4 C/7628038-7628107                                    | 1.716     | 1.636     | 0.937     | 1.615  |

|            |           |                                                             |           |           |        |        |
|------------|-----------|-------------------------------------------------------------|-----------|-----------|--------|--------|
| A013555_01 | At4g15200 | expressed protein; protein id: At4g15200.1                  | 1.845     | 1.602     | 0.731  | 1.009  |
| A013559_01 | At4g15620 | hypothetical protein; protein id: At4g15620.1               | -2.389    | -2.574    | -1.456 | -2.804 |
| A013560_01 | At4g15630 | expressed protein; protein id: At4g15630.1                  | -1.394    | -1.477    | -1.269 | -2.36  |
| A013561_01 | At4g15640 | hypothetical protein; protein id: At4g15640.1               | 1.474     | 1.309     | 1.171  | 1.73   |
| A013562_01 | At4g15650 | kinase like protein; protein id: At4g15650.1                | -0.242    | 0.36 NA   |        | -1.518 |
| A013564_01 | At4g15790 | expressed protein; protein id: At4g15790.1                  | 0.756     | 0.771     | 0.707  | 0.818  |
| A013571_01 | At4g16430 | transcription factor like protein; protein id: At4g1643     | -0.083    | -0.153    | 0.227  | 0.32   |
| A013572_01 | At4g16450 | expressed protein; protein id: At4g16450.1                  | 0.601     | 0.635     | 0.631  | 0.59   |
| A013574_01 | At4g16580 | hypothetical protein; protein id: At4g16580.1               | -0.395    | -0.067 NA |        | -0.003 |
| A013577_01 | At4g16710 | hypothetical protein; protein id: At4g16710.1               | -0.309    | -0.35     | -0.058 | 0.106  |
| A013579_01 | At4g16800 | enoyl-CoA hydratase; protein id: At4g16800.1                | 0.409     | 0.253     | 0.233  | 0.432  |
| A013586_01 | At4g17070 | expressed protein; protein id: At4g17070.1                  | -0.707 NA |           | -0.703 | -1.192 |
| A013590_01 | At4g17150 | hypothetical protein; protein id: At4g17150.1               | 0.226     | 0.231 NA  |        | -0.083 |
| A013591_01 | At4g17180 | glycosyl hydrolase family 17; protein id: At4g17180.        | 0.366     | 0.414 NA  |        | 0.164  |
| A013604_01 | At4g28280 | putative GPI-anchored protein; protein id: At4g2828         | -0.116    | -0.087 NA |        | -0.953 |
| A013605_01 | At4g28290 | putative protein; protein id: At4g28290.1                   | -1.473    | -1.28     | -0.811 | -1.363 |
| A013606_01 | At4g28660 | photosystem II protein W - like; protein id: At4g2866       | 1.016     | 0.927     | 0.478  | 0.505  |
| A013614_01 | At4g30500 | putative protein; protein id: At4g30500.1                   | 0.785     | 0.581     | 1.057  | 0.704  |
| A013616_01 | At4g30580 | putative protein; protein id: At4g30580.1                   | 0.015     | -0.131    | -0.046 | 0.08   |
| A013617_01 | At4g30620 | putative protein; protein id: At4g30620.1                   | 0.794     | 0.569     | 0.202  | -0.109 |
| A013618_01 | At4g30650 | low temperature and salt responsive protein homolc          | 1.497     | 1.607     | 0.352  | -0.247 |
| A013619_01 | At4g31110 | WAK-like kinase (WLK); protein id: At4g31110.1              | -0.824    | -1.163    | -0.598 | -1.017 |
| A013622_01 | At4g31180 | aspartate--tRNA ligase - like protein; protein id: At4g     | 0.009     | 0.079     | 0.18   | 0.477  |
| A013625_01 | At4g36420 | ribosomal protein; protein id: At4g36420.1                  | 0.737     | 0.704     | 0.735  | 0.546  |
| A013627_01 | At4g36490 | expressed protein; protein id: At4g36490.1                  | -0.72     | -0.408 NA |        | -1.688 |
| A013628_01 | At4g36520 | trichohyalin like protein; protein id: At4g36520.1          | -0.373    | -0.073    | 0.094  | -0.313 |
| A013632_01 | At4g36640 | putative protein; protein id: At4g36640.1                   | -0.84     | -1.104 NA |        | -0.327 |
| A013633_01 | At4g36660 | hypothetical protein; protein id: At4g36660.1               | 0.96      | 0.93      | 0.84   | 0.819  |
| A013634_01 | At4g36720 | putative protein; protein id: At4g36720.1                   | -0.684    | -0.592    | -0.237 | -0.797 |
| A013637_01 | At4g36940 | hypothetical protein; protein id: At4g36940.1               | 1.04      | 0.877     | 0.551  | 1.05   |
| A013640_01 | At4g37040 | methionyl aminopeptidase-like protein; protein id: A        | 0.3       | 0.001     | -0.332 | -0.123 |
| A013643_01 | At4g37180 | putative cytoskeletal protein; protein id: At4g37180.       | -0.545    | -0.513    | -0.594 | -0.986 |
| A013644_01 | At4g37280 | putative protein; protein id: At4g37280.1                   | 0.33      | -0.081    | -0.152 | -0.275 |
| A013646_01 | At4g35570 | HMG delta protein; protein id: At4g35570.1                  | 0.166     | 0.061     | 0.449  | 0.547  |
| A013647_01 | At4g00900 | Ca2+-transporting ATPase - like protein; protein id:        | 0.135 NA  |           | 0.376  | 0.581  |
| A013651_01 | At4g16360 | kinase like protein; protein id: At4g16360.1                | 0.253     | 0.334 NA  |        | 0.683  |
| A013657_01 | At4g12080 | putative DNA-binding protein; protein id: At4g12080         | -1.513    | -1.11 NA  |        | NA     |
| A013658_01 | At4g21150 | putative protein; protein id: At4g21150.1                   | 0.713     | 0.543     | 0.186  | 0.75   |
| A013659_01 | At4g10610 | RNA-binding protein RBP37; protein id: At4g10610.           | -0.607    | -0.61     | -0.057 | -0.2   |
| A013660_01 | At4g11560 | putative protein; protein id: At4g11560.1                   | 0.227     | -0.261    | 0.098  | 0.268  |
| A013661_01 | At4g40030 | histone H3.3; protein id: At4g40030.1                       | -0.006    | -0.384    | 0.15   | 0.588  |
| A013662_01 | At4g33240 | putative protein; protein id: At4g33240.1                   | 0.145     | -0.047    | -0.153 | -0.332 |
| A013663_01 | At4g12070 | putative protein; protein id: At4g12070.1                   | -1.035 NA |           | NA     | NA     |
| A013664_01 | At4g24640 | Bnm1 like protein; protein id: At4g24640.1                  | -0.672    | -0.477 NA |        | NA     |
| A013667_01 | At4g36380 | rotundifolia3 (rot3); protein id: At4g36380.1               | 0.725     | 0.612     | 0.621  | 1.316  |
| A013668_01 | At4g10100 | auxin-regulated protein; protein id: At4g10100.2            | -0.552    | -0.069    | 0.006  | -0.183 |
| A013669_01 | At4g24190 | HSP90-like protein; protein id: At4g24190.1                 | 1.104     | 0.783     | 0.794  | 1.111  |
| A013671_01 | At4g35300 | putative sugar transporter protein; protein id: At4g35      | -0.004 NA |           | NA     | NA     |
| A013674_01 | xxxx      | b/t Expressed protein; protein id: At4g19095.1 and t        | 0.371     | 0.42      | 0.159  | -0.403 |
| A013675_01 | At4g34490 | putative cyclase associated protein CAP; protein id:        | 0.228     | 0.284 NA  |        | 0.269  |
| A013676_01 | At4g35690 | putative protein; protein id: At4g35690.1                   | -3.259    | -2.601    | -0.97  | -1.458 |
| A013680_01 | At4g12800 | probable photosystem I chain XI precursor; protein i        | -0.52     | -0.8      | -0.513 | -0.61  |
| A013681_01 | At4g15930 | dynein light chain like protein; protein id: At4g15930      | 0.474     | 0.325     | 0.522  | 0.19   |
| A013682_01 | At4g00720 | Shaggy related protein kinase tetha; protein id: At4g       | -0.774 NA |           | -1.167 | -1.539 |
| A013684_01 | At4g18060 | putative protein; protein id: At4g18060.1                   | 0.567     | 0.629 NA  |        | 0.505  |
| A013685_01 | At4g26190 | putative protein; protein id: At4g26190.1                   | -0.002 NA |           |        | 0.523  |
| A013689_01 | At4g39080 | putative proton pump; protein id: At4g39080.1               | -0.104    | -0.133    | -0.318 | -0.393 |
| A013691_01 | At4g09960 | MADS-box protein; protein id: At4g09960.1                   | 1.023     | 0.688     | 1.261  | 1.709  |
| A013692_01 | At4g02470 | coded for by A. thaliana cDNA T75804; protein id: A         | -0.222    | -0.374    | -0.432 | -0.678 |
| A013695_01 | At4g03420 | hypothetical protein; protein id: At4g03420.1               | -0.885    | -0.883    | -0.921 | -1.29  |
| A013697_01 | At4g15610 | expressed protein; protein id: At4g15610.1                  | -3.462    | -3.435    | -1.939 | -3.501 |
| A013699_01 | At4g17560 | putative protein; protein id: At4g17560.1                   | 0.642     | 0.675     | 0.43   | 0.357  |
| A013700_01 | At4g18280 | glycine-rich cell wall protein-like; protein id: At4g182 NA |           | NA        | -0.301 | -2.016 |
| A013705_01 | At4g39350 | cellulose synthase catalytic subunit (Ath-A)                | 0.414     | 0.205     | 0.052  | -0.22  |
| A013707_01 | At4g39300 | putative protein; protein id: At4g39300.1                   | 0.376     | 0.496     | 0.722  | 0.582  |
| A013710_01 | At4g38510 | probable H+-transporting ATPase; protein id: At4g3          | 0.342     | 0.028     | 0.057  | 0.081  |
| A013711_01 | At4g15910 | drought-induced protein like; protein id: At4g15910.        | 1.289     | 1.193     | 1.489  | 1.657  |
| A013714_01 | At4g01610 | cathepsin B-like cysteine protease, putative; protein       | -1.999    | -1.882    | -1.25  | -0.85  |

|            |           |                                                           |        |        |        |        |
|------------|-----------|-----------------------------------------------------------|--------|--------|--------|--------|
| A013715_01 | At4g39150 | DnaJ-like protein; protein id: At4g39150.1                | -0.09  | -0.501 | -0.028 | 0.144  |
| A013717_01 | At4g16190 | cysteine proteinase; protein id: At4g16190.1              | -2.245 | -2.305 | -1.125 | -1.51  |
| A013719_01 | At4g15530 | pyruvate,orthophosphate dikinase; protein id: At4g1       | -2.419 | -2.577 | -1.996 | -2.068 |
| A013720_01 | At4g03150 | expressed protein; protein id: At4g03150.1                | -0.086 | 0.041  | -0.034 | -0.609 |
| A013721_01 | At4g39140 | putative protein; protein id: At4g39140.1                 | NA     | NA     | -1.332 | -2.461 |
| A013723_01 | At4g10730 | putative protein kinase; protein id: At4g10730.1          | -0.159 | -0.743 | NA     | -0.392 |
| A013724_01 | At4g33640 | putative protein; protein id: At4g33640.1                 | -0.456 | -0.375 | -0.046 | -0.502 |
| A013727_01 | At4g36440 | putative protein; protein id: At4g36440.1                 | -0.037 | 0.154  | -0.232 | 0.216  |
| A013728_01 | At4g37440 | putative protein; protein id: At4g37440.1                 | -0.405 | -0.83  | NA     | 0.034  |
| A013731_01 | At4g33690 | hypothetical protein; protein id: At4g33690.1             | -0.517 | NA     | NA     | -0.502 |
| A013732_01 | At4g21990 | PRH26 protein; protein id: At4g21990.1                    | -0.678 | -0.818 | -0.715 | -1.107 |
| A013733_01 | At4g22000 | expressed protein; protein id: At4g22000.1                | 0.571  | 0.549  | 0.92   | 0.56   |
| A013735_01 | At4g29040 | 26S proteasome AAA-ATPase subunit RPT2a; prot             | 0.005  | -0.022 | 0.138  | 0.506  |
| A013736_01 | At4g28750 | photosystem I subunit PSI-E - like protein; protein ic    | -0.644 | -0.57  | -0.432 | -0.3   |
| A013739_01 | At4g32930 | putative protein; protein id: At4g32930.1                 | -0.1   | 0.231  | 0.253  | -0.12  |
| A013744_01 | At4g22570 | adenine phosphoribosyltransferase (EC 2.4.2.7) - lik      | -1.218 | -1.286 | -0.705 | -0.734 |
| A013746_01 | At4g25370 | putative protein; protein id: At4g25370.1                 | 0.306  | NA     | 0.29   | 0.209  |
| A013747_01 | At4g25730 | putative protein; protein id: At4g25730.1                 | 0.606  | 0.584  | 0.59   | 0.375  |
| A013749_01 | At4g30660 | stress responsive protein homolog; protein id: At4g3      | 0.895  | 0.874  | -0.326 | -1.204 |
| A013751_01 | At4g13220 | hypothetical protein; protein id: At4g13220.1             | -0.481 | -0.301 | -0.308 | -1.067 |
| A013755_01 | At4g33030 | sulfolipid biosynthesis protein SQD1; protein id: At4     | 1.185  | 0.92   | 0.654  | 1.202  |
| A013756_01 | At4g24090 | hypothetical protein; protein id: At4g24090.1             | 0.199  | NA     | 0.063  | -0.189 |
| A013758_01 | At4g21450 | putative membrane associated protein; protein id: A       | -0.956 | -0.841 | -0.405 | -0.609 |
| A013764_01 | At4g11240 | protein phosphatase type 1 (AtPP1bg); protein id: A       | 0.043  | 0.418  | 0.2    | 0.639  |
| A013765_01 | At4g35250 | putative protein; protein id: At4g35250.1                 | -0.161 | -0.149 | -0.334 | -0.433 |
| A013770_01 | At4g01480 | putative inorganic phosphatase; protein id: At4g014       | -0.696 | -0.743 | -0.173 | -0.239 |
| A013773_01 | At4g02570 | putative cullin-like 1 protein; protein id: At4g02570.1   | 0.07   | -0.313 | -0.332 | -0.201 |
| A013774_01 | At4g34200 | phosphoglycerate dehydrogenase - like protein; pro        | 1.153  | 1.052  | 0.9    | 1.384  |
| A013775_01 | At4g02790 | hypothetical protein; protein id: At4g02790.1             | 0.802  | 0.9    | 0.357  | 0.647  |
| A013778_01 | At4g23660 | UbiA prenyltransferase family; protein id: At4g23660      | -0.439 | 0.036  | -0.144 | 0.401  |
| A013780_01 | At4g09760 | choline kinase GmCK2p -like protein; protein id: At4      | NA     | NA     | NA     | NA     |
| A013782_01 | At4g20930 | 3-hydroxyisobutyrate dehydrogenase -like protein; p       | -1.011 | -1.053 | -0.233 | -0.746 |
| A013785_01 | At4g13150 | hypothetical protein; protein id: At4g13150.1             | -0.038 | 0.291  | -0.27  | -0.14  |
| A013787_01 | At4g09830 | putative protein; protein id: At4g09830.1                 | -0.713 | -0.816 | -0.059 | -0.732 |
| A013795_01 | At4g23730 | putative protein; protein id: At4g23730.1                 | -0.532 | NA     | -0.382 | -0.568 |
| A013796_01 | At4g00355 | expressed protein; protein id: At4g00355.1                | -1.214 | -1.011 | -0.493 | -0.731 |
| A013799_01 | At4g30993 | expressed protein; protein id: At4g30993.1                | -1.396 | NA     | -1.278 | -1.628 |
| A013801_01 | At4g38930 | putative ubiquitin-dependent proteolytic protein; pro     | -0.327 | -0.429 | NA     | -0.011 |
| A013805_01 | At4g21980 | AtAPG8a; symbiosis-related like protein; protein id:      | -1.753 | -2.006 | -0.812 | -1.454 |
| A013806_01 | At4g31720 | transcription factor II homolog; protein id: At4g3172     | 0.052  | -0.058 | -0.068 | -0.707 |
| A013807_01 | At4g09720 | GTP-binding protein, putative; protein id: At4g09720      | 0.509  | 0.285  | 0.37   | 0.496  |
| A013810_01 | At4g24840 | brefeldin A-sensitive Golgi protein - like; protein id: / | 0.095  | NA     | -0.097 | -0.084 |
| A013829_01 | At4g32050 | putative protein; protein id: At4g32050.1                 | 0.13   | 0.087  | NA     | 0.035  |
| A013831_01 | At4g29520 | putative protein; protein id: At4g29520.1                 | 1.482  | 1.179  | 1.314  | 1.441  |
| A013832_01 | At4g29060 | unknown protein; protein id: At4g29060                    | 0.689  | 0.585  | 0.1    | 0.009  |
| A013833_01 | At4g01940 | putative NifU-like metallocluster assembly factor; pr     | -0.715 | -0.851 | -0.334 | -0.543 |
| A013835_01 | At4g26370 | putative protein; protein id: At4g26370.1                 | 0.68   | 0.473  | 0.232  | 0.636  |
| A013847_01 | At4g33470 | putative protein; protein id: At4g33470.1                 | -0.099 | NA     | -0.284 | -0.179 |
| A013856_01 | At4g20270 | leucine-rich repeat transmembrane protein kinase, /       | 1.02   | 0.984  | 1.044  | 1.385  |
| A013857_01 | At4g01320 | putative CAAX prenyl protease; protein id: At4g0132       | -0.034 | 0.247  | 0.118  | 0.173  |
| A013863_01 | At4g20760 | cell-cell signaling protein csgA - like; protein id: At4  | 0.77   | 0.709  | 0.16   | 0.245  |
| A013872_01 | At4g38770 | extensin - like protein; protein id: At4g38770.1          | 1.733  | 1.375  | 0.711  | 0.802  |
| A013875_01 | At4g08290 | nodulin-like protein; protein id: At4g08290.1             | NA     | NA     | -1.782 | NA     |
| A013876_01 | xxxx      | b/t putative protein; protein id: At4g08280.1 and noc     | 0.078  | 0.269  | 0.082  | 0.054  |
| A013879_01 | At4g02370 | coded for by A. thaliana cDNA R64991; protein id: /       | -0.285 | -0.031 | -0.71  | -0.782 |
| A013880_01 | At4g02020 | polycomb group - like protein; protein id: At4g02020      | -0.427 | -0.94  | -1.048 | -0.917 |
| A013884_01 | At4g02120 | CTP synthase - like protein; protein id: At4g02120.1      | 0.146  | -0.1   | 0.138  | 0.009  |
| A013887_01 | At4g13110 | putative protein; protein id: At4g13110.1                 | NA     | NA     | NA     | -0.834 |
| A013889_01 | At4g00750 | hypothetical protein; protein id: At4g00750.1             | 0.111  | -0.118 | NA     | -0.925 |
| A013896_01 | At4g19040 | hypothetical protein; protein id: At4g19040.1             | -0.104 | NA     | NA     | -0.662 |
| A013898_01 | At4g03080 | putative phospho-ser/thr phosphatase; protein id: Ai      | -0.473 | -0.562 | -0.453 | -0.974 |
| A013901_01 | At4g03120 | putative C-type U1 snRNP; protein id: At4g03120.1         | 0.487  | 0.537  | 0.35   | -0.06  |
| A013903_01 | At4g31290 | unknown protein; protein id: At4g31290.1                  | 0.481  | 0.692  | 0.646  | 0.821  |
| A013904_01 | At4g03180 | unknown protein; protein id: At4g03180.1                  | 0.053  | -0.01  | 0.096  | -0.195 |
| A013911_01 | At4g32710 | putative protein kinase; protein id: At4g32710.1          | 1.541  | 1.325  | 1.352  | 1.915  |
| A013912_01 | At4g12590 | putative protein; protein id: At4g12590.1                 | 0.202  | 0.193  | 0.261  | -0.07  |
| A013914_01 | At4g26980 | putative protein; protein id: At4g26980.1                 | -0.156 | -0.104 | NA     | 0.054  |
| A013931_01 | At4g02580 | predicted NADH dehydrogenase 24 kD subunit; pro           | 0.769  | 0.51   | 0.461  | 0.733  |

|            |           |                                                           |           |           |          |        |
|------------|-----------|-----------------------------------------------------------|-----------|-----------|----------|--------|
| A013932_01 | At4g12230 | putative protein; protein id: At4g12230.1                 | -0.013    | -0.26     | -0.06    | -0.177 |
| A013942_01 | At4g14500 | expressed protein; protein id: At4g14500.1                | -0.141    | -0.288    | -0.293   | -0.242 |
| A013944_01 | At4g04770 | putative ABC transporter; protein id: At4g04770.1         | -0.412    | -0.713    | -0.394   | -0.429 |
| A013945_01 | At4g04860 | unknown protein; protein id: At4g04860.1                  | -0.316    | -0.353    | 0.131    | -0.295 |
| A013948_01 | At4g29670 | thioredoxin - like protein; protein id: At4g29670.1       | -0.438    | -0.222    | -0.705   | -0.553 |
| A013950_01 | At4g04950 | putative thioredoxin; protein id: At4g04950.1             | 0.5       | 0.186     | -0.08    | 0.241  |
| A013951_01 | At4g04960 | unknown protein; protein id: At4g04960.1                  | -0.87     | -0.684    | -0.715   | -0.789 |
| A013956_01 | At4g21470 | putative protein; protein id: At4g21470.1                 | -0.149    | -0.368    | 0.302    | 0.294  |
| A013960_01 | At4g02770 | putative photosystem I reaction center subunit II pre     | -0.718    | -0.494    | -0.133   | -0.683 |
| A013971_01 | At4g05420 | UV-damaged DNA binding factor - like protein; prot        | -0.268    | -0.403    | -0.584   | -0.684 |
| A013973_01 | At4g35340 | UDP-galactose transporter - like protein; protein id:     | 0.49      | 0.419     | 0.33     | 0.632  |
| A013974_01 | At4g24400 | serine/threonine kinase-like protein; protein id: At4g    | -0.49     | -1.042    | -0.258   | -0.092 |
| A013975_01 | At4g07670 | putative peptidase; protein id: At4g07670.1               | 0.021     | -0.491    | -0.023   | 0.15   |
| A013980_01 | At4g35290 | putative protein; protein id: At4g35290.1                 | -0.855    | -1.097 NA |          | -0.7   |
| A013987_01 | At5g17900 | microfibril-associated protein - like; protein id: At5g1  | -0.186    | -0.289    | -0.003   | 0.201  |
| A013989_01 | At5g45775 | expressed protein; protein id: At5g45775.2                | 0.942     | 0.828     | 0.977    | 0.7    |
| A013994_01 | At4g24290 | putative protein; protein id: At4g24290.1                 | -0.351    | -0.444    | -0.085   | -0.089 |
| A013995_01 | At4g24230 | putative protein; protein id: At4g24230.1                 | -1.02     | -1.278    | -0.573   | -0.742 |
| A013998_01 | At4g39620 | putative protein; protein id: At4g39620.1                 | 0.853     | 0.489     | 0.316    | 0.931  |
| A014000_01 | At4g09150 | putative protein; protein id: At4g09150.1                 | -0.126    | -0.376    | -0.443   | -1.012 |
| A014010_01 | At4g10710 | putative transcriptional regulator; protein id: At4g107   | -0.002    | 0.067     | -0.148   | -0.518 |
| A014014_01 | At4g10790 | hypothetical protein; protein id: At4g10790.1             | -0.023 NA |           | -0.629   | -1.004 |
| A014015_01 | At4g29120 | putative protein; protein id: At4g29120.1                 | NA        | NA        | 0.046    | -0.442 |
| A014016_01 | At4g14010 | expressed protein; protein id: At4g14010.1                | 0.275 NA  |           | 0.427 NA |        |
| A014017_01 | At4g10380 | major intrinsic protein (MIP) - like; protein id: At4g103 | NA        | NA        | -1.14 NA |        |
| A014019_01 | At4g27340 | putative protein; protein id: At4g27340.1                 | 0.422 NA  | NA        |          | 0.517  |
| A014020_01 | At4g00740 | unknown protein; protein id: At4g00740.1                  | 0.373     | 0.37      | 0.201    | 0.429  |
| A014021_01 | At4g37050 | patatin, putative; protein id: At4g37050.1                | NA        | NA        | NA       | NA     |
| A014024_01 | At4g29810 | MAP kinase kinase 2; protein id: At4g29810.1              | 0.307     | 0.065     | 0.247    | 0.578  |
| A014025_01 | At4g20880 | ethylene-regulated transcript 2 (ERT2); protein id: A     | -0.851    | -0.452    | -0.266   | -0.366 |
| A014026_01 | At4g25500 | arginine/serine-rich splicing factor RSp40; protein id    | -0.328    | 0.099     | -0.241   | -0.824 |
| A014027_01 | At4g08470 | putative mitogen-activated protein kinase; protein id     | -0.551 NA | NA        | NA       |        |
| A014031_01 | At4g26700 | fimbrin-like protein (ATFIM1); protein id: At4g26700      | -1.283    | -1.388    | -0.836   | -1.281 |
| A014036_01 | At4g12060 | putative protein; protein id: At4g12060.1                 | 0.276     | 0.387     | 0.266    | 0.597  |
| A014038_01 | At4g28910 | putative protein; protein id: At4g28910.1                 | 0.329     | -0.011    | -0.045   | 0.376  |
| A014040_01 | At4g11320 | cysteine proteinase; protein id: At4g11320.1              | 2.25      | 1.694     | 1.722    | 2.709  |
| A014043_01 | At4g31790 | methyltransferase - like protein; protein id: At4g3179    | 0.583 NA  |           | 0.603    | 0.644  |
| A014046_01 | At4g25000 | alpha-amylase - like protein; protein id: At4g25000.1     | -2.305    | -0.933    | -1.355   | -2.238 |
| A014056_01 | At4g30210 | NADPH-ferrihemoprotein reductase (ATR2)                   | -0.816    | -0.728    | -0.757   | -0.909 |
| A014062_01 | At4g27650 | pelota (PEL1); protein id: At4g27650.1                    | -0.231    | -0.403    | -0.297   | -0.586 |
| A014064_01 | At4g33430 | somatic embryogenesis receptor-like kinase -like pr       | -0.496    | -0.319    | -0.175   | -0.839 |
| A014066_01 | At4g23880 | hypothetical protein; protein id: At4g23880.1             | -1.957    | -2.069    | -0.725   | -1.814 |
| A014067_01 | At4g16330 | naringenin 3-dioxygenase like protein; protein id: At     | -0.208    | -0.304    | -0.004   | -0.327 |
| A014068_01 | At4g23870 | putative protein                                          | -0.155    | 0.166     | 0.442    | -0.473 |
| A014069_01 | At4g23710 | V-ATPase subunit G (vag2 gene); protein id: At4g237       | -0.158    | 0.373     | 0.261    | -0.097 |
| A014072_01 | At4g16520 | AtAPG8f; symbiosis-related like protein; protein id: A    | -1.271    | -1.454    | -0.916   | -1.017 |
| A014075_01 | At4g00490 | glycosyl hydrolase family 14 (beta-amylase); protein      | 0.925     | 0.734     | 0.663    | 1.328  |
| A014083_01 | At4g16770 | gibberellin oxidase-like protein; protein id: At4g1677    | -0.007 NA |           | -0.147   | 0.281  |
| A014084_01 | At4g34110 | polyadenylate-binding protein 2 (PABP2); protein id       | 0.045     | -0.035    | -0.406   | -0.14  |
| A014085_01 | At4g31270 | hypothetical protein; protein id: At4g31270.1             | 0.595 NA  | NA        |          | 0.287  |
| A014086_01 | At4g27900 | putative protein; protein id: At4g27900.1                 | 1.012     | 0.912     | 0.906    | 1.189  |
| A014088_01 | At4g31310 | AlG2-like protein; protein id: At4g31310.1                | -0.222 NA |           | 0.214    | -0.376 |
| A014089_01 | At4g18810 | putative protein; protein id: At4g18810.1                 | -0.116    | -0.557    | -0.317   | -0.223 |
| A014095_01 | At4g28760 | putative protein; protein id: At4g28760.1                 | 0.193     | 0.25      | 0.376    | 0.342  |
| A014097_01 | At4g22920 | expressed protein; protein id: At4g22920.1                | -3.093 NA |           | -1.68    | -2.035 |
| A014098_01 | At4g12790 | putative protein; protein id: At4g12790.1                 | 0.158     | -0.149    | -0.089   | 0.177  |
| A014109_01 | At4g17730 | syntaxin SYP23; protein id: At4g17730.1                   | -0.141    | -0.435    | -0.247   | -0.102 |
| A014112_01 | At4g32140 | putative protein; protein id: At4g32140.1                 | NA        | NA        | 0.212    | 0.084  |
| A014113_01 | At4g32130 | unknown protein                                           | -0.134    | -0.131    | 0.144    | -0.042 |
| A014115_01 | At4g28040 | Medicago nodulin N21-like protein; protein id: At4g2      | -2.721 NA |           | -0.881   | -1.824 |
| A014117_01 | At4g28210 | expressed protein; protein id: At4g28210.1                | 0.354 NA  |           | 0.341    | 0.21   |
| A014119_01 | At4g09670 | AX110P -like protein; protein id: At4g09670.1             | -0.229    | -0.079    | 0.289    | 0.349  |
| A014121_01 | At4g00360 | cytochrome p450, putative; protein id: At4g00360.1        | -0.915 NA |           | -0.485   | -1.079 |
| A014124_01 | At4g27800 | protein phosphatase homolog (PPH1); protein id: At        | -0.775    | -0.79     | -0.825   | -1.25  |
| A014126_01 | At4g28025 | expressed protein; protein id: At4g28025.1                | -0.831    | -0.802    | -0.609   | -1.651 |
| A014130_01 | At4g30490 | putative protein; protein id: At4g30490.1                 | -1.032    | -1.893    | -0.418   | 0.021  |
| A014131_01 | At4g14040 | selenium-binding protein like; protein id: At4g14040      | -1.789    | -1.86     | -0.887   | -0.722 |
| A014132_01 | At4g38225 | expressed protein; protein id: At4g38225.1                | -0.793 NA |           | -0.283   | -1.118 |

|            |           |                                                                |           |           |        |        |
|------------|-----------|----------------------------------------------------------------|-----------|-----------|--------|--------|
| A014136_01 | At4g24750 | putative protein; protein id: At4g24750.1                      | 0.621     | 0.756     | 0.428  | 0.589  |
| A014137_01 | At4g31090 | putative protein; protein id: At4g31090.1                      | -0.513    | -0.45     | -0.406 | -0.659 |
| A014139_01 | At4g20130 | hypothetical protein; protein id: At4g20130.1                  | 0.926     | 0.699     | 0.357  | 0.797  |
| A014140_01 | At4g33350 | Tic22 -like protein; protein id: At4g33350.1                   | 0.011     | 0.406     | 0.191  | -0.393 |
| A014141_01 | At4g31150 | putative protein; protein id: At4g31150.1                      | -0.451 NA | NA        | NA     |        |
| A014144_01 | At4g38920 | H <sup>+</sup> -transporting ATPase 16K chain P2, vacuolar; pr | -0.391    | -0.24     | 0.036  | -0.353 |
| A014146_01 | At4g39170 | SEC14 - like protein; protein id: At4g39170.1                  | 0.647     | 0.792     | 0.751  | 1.534  |
| A014147_01 | At4g36400 | actin interacting protein; protein id: At4g36400.1             | -0.823 NA |           | -0.851 | -0.288 |
| A014155_01 | At4g30100 | putative protein; protein id: At4g30100.1                      | -0.474    | -1.03 NA  |        | -0.488 |
| A014161_01 | At4g36760 | aminopeptidase-like protein; protein id: At4g36760.1           | -1.085    | -1.357    | -0.54  | -1.297 |
| A014163_01 | At4g18400 | expressed protein; protein id: At4g18400.1                     | 0.752     | 0.904     | 0.462  | 0.209  |
| A014165_01 | At4g30790 | putative protein; protein id: At4g30790.1                      | -0.866    | -1.028 NA |        | -0.76  |
| A014167_01 | At4g37000 | putative protein; protein id: At4g37000.1                      | -0.182 NA | NA        |        | -0.815 |
| A014168_01 | At4g24700 | hypothetical protein; protein id: At4g24700.1                  | -1.436    | -1.097 NA |        | -0.869 |
| A014169_01 | At4g18910 | major intrinsic protein (MIP)- like; protein id: At4g18        | 0.103     | 0.051     | 0.411  | 0.888  |
| A014174_01 | At4g37190 | tubulin-like protein; protein id: At4g37190.1                  | 0.242     | 0.209 NA  |        | -0.641 |
| A014176_01 | At4g39100 | ES43 like protein; protein id: At4g39100.1                     | -1.021    | -0.958    | -0.555 | -0.83  |
| A014177_01 | At4g10140 | expressed protein; protein id: At4g10140.1                     | -0.307    | -0.237    | 0.394  | -0.016 |
| A014178_01 | At4g39220 | AtRer1A; protein id: At4g39220.1                               | -0.054 NA |           | 0.205  | -0.184 |
| A014179_01 | At4g24680 | putative protein; protein id: At4g24680.1                      | -0.155    | -0.462 NA |        | -0.56  |
| A014180_01 | At4g38540 | monooxygenase 2 (MO2); protein id: At4g38540.1 NA              | NA        | NA        | NA     |        |
| A014182_01 | At4g11820 | hydroxymethylglutaryl-CoA synthase; protein id: At4            | 0.955     | 0.857     | 0.615  | 1.186  |
| A014185_01 | At4g17740 | photosystem li D1 carboxy-terminal protease; protei            | 0.175     | 0.245     | 0.141  | 0.288  |
| A014186_01 | At4g36730 | G-box-binding factor 1; protein id: At4g36730.1                | -0.627    | -0.887    | -0.404 | -0.721 |
| A014188_01 | At4g10110 | putative protein; protein id: At4g10110.1                      | -0.449 NA | NA        | NA     |        |
| A014189_01 | At4g39210 | glucose-1-phosphate adenyllyltransferase (APL3); p             | 0.475     | 0.358     | 0.156  | 0.667  |
| A014192_01 | At4g01100 | mitochondrial carrier protein family; protein id: At4g         | -0.206    | -0.009    | -0.25  | -0.04  |
| A014194_01 | At4g38360 | putative protein; protein id: At4g38360.1                      | -0.632    | -0.757    | -0.374 | -0.566 |
| A014201_01 | At4g27740 | putative protein; protein id: At4g27740.1                      | -0.897    | -0.765    | -0.08  | -0.417 |
| A014202_01 | At4g27750 | hypothetical protein; protein id: At4g27750.1                  | 0.123     | 0.064     | -0.046 | 0.03   |
| A014203_01 | At4g38750 | hypothetical protein; protein id: At4g38750.1                  | 0.553     | 0.451     | 0.704  | 1.352  |
| A014204_01 | At4g38800 | putative protein; protein id: At4g38800.1                      | -0.056    | -0.163    | -0.094 | -0.071 |
| A014205_01 | At4g38840 | auxin-induced protein - like; protein id: At4g38840.1          | -0.393 NA |           | -0.14  | -1.423 |
| A014208_01 | At4g38890 | putative protein; protein id: At4g38890.1                      | 0.576     | 0.52      | 0.733  | 1.083  |
| A014209_01 | At4g38900 | bZIP protein; protein id: At4g38900.1                          | 0.292 NA  | NA        |        | -0.177 |
| A014210_01 | At4g38960 | CONSTANS B-box zinc finger family protein; proteir             | -0.315    | -0.516    | 0.452  | 0.735  |
| A014213_01 | At4g27090 | ribosomal protein L14 -like protein; protein id: At4g2         | 0.258     | 0.372     | 0.909  | 1.307  |
| A014224_01 | At4g09890 | putative protein; protein id: At4g09890.1                      | -2.005    | -1.793    | -0.717 | -0.993 |
| A014229_01 | At4g10080 | putative protein; protein id: At4g10080.1                      | -1.342    | -0.776    | -0.762 | -1.114 |
| A014233_01 | At4g09750 | putative protein; protein id: At4g09750.1                      | 0.091     | -0.221    | -0.061 | 0.123  |
| A014239_01 | At4g25910 | nitrogen fixation like protein; protein id: At4g25910.1        | -0.425    | -0.412    | -0.238 | -0.208 |
| A014245_01 | At4g10170 | putative protein; protein id: At4g10170.1                      | -0.195    | -0.419    | -0.022 | -0.331 |
| A014247_01 | At4g10270 | probable wound-induced protein; protein id: At4g10;            | 1.855     | 1.478     | 1.273  | 1.407  |
| A014248_01 | At4g10280 | putative protein; protein id: At4g10280.1                      | -0.038    | 0.132     | 0.527  | -0.148 |
| A014249_01 | At4g10300 | putative protein; protein id: At4g10300.1                      | 0.083     | -0.166    | -0.17  | -0.393 |
| A014250_01 | At4g10360 | expressed protein; protein id: At4g10360.1                     | -0.507    | -0.864    | -0.219 | -0.525 |
| A014253_01 | At4g33510 | 2-dehydro-3-deoxyphosphoheptonate aldolase; prot               | 0.048     | -0.091    | -0.551 | -0.213 |
| A014256_01 | At4g10480 | putative alpha NAC; protein id: At4g10480.1                    | 0.652     | 0.719     | 0.476  | 0.629  |
| A014257_01 | At4g10810 | putative protein; protein id: At4g10810.1                      | -0.239 NA | NA        | NA     |        |
| A014264_01 | At4g31880 | putative protein; protein id: At4g31880.1                      | 0.432     | 0.129     | 0.245  | 0.174  |
| A014270_01 | At4g12000 | putative protein; protein id: At4g12000.1                      | -0.64     | -1.277 NA | NA     |        |
| A014274_01 | At4g12830 | hydrolase-like protein; protein id: At4g12830.1                | -1.929    | -1.752    | -1.72  | -2.225 |
| A014275_01 | At4g12890 | putative protein; protein id: At4g12890.1                      | 2.005     | 1.543     | 1.555  | 2.536  |
| A014276_01 | At4g13530 | putative protein; protein id: At4g13530.1                      | -1.616    | -1.839    | -0.802 | -1.137 |
| A014278_01 | At4g24820 | 26S proteasome regulatory subunit (RPN7), putativ              | 0.247     | 0.19      | 0.291  | 0.452  |
| A014286_01 | At4g27070 | tryptophan synthase beta-subunit (TSB2); protein id            | 0.649     | 0.628     | 0.77   | 0.874  |
| A014293_01 | At4g29780 | expressed protein; protein id: At4g29780.1 NA                  | NA        | NA        | -0.301 | -0.922 |
| A014295_01 | At4g11570 | putative protein; protein id: At4g11570.1                      | -1.297 NA |           | -1.188 | -1.623 |
| A014304_01 | At4g29110 | putative protein; protein id: At4g29110.1                      | -2.339 NA | NA        | NA     |        |
| A014305_01 | At4g29160 | putative protein; protein id: At4g29160.1                      | -0.301    | -0.763    | -0.328 | -0.388 |
| A014307_01 | At4g27870 | unknown protein; protein id: At4g27870                         | 0.805     | 0.677     | 0.287  | 0.416  |
| A014310_01 | At4g39400 | brassinosteroid insensitive 1 gene (BRI1); protein id          | 0.615     | 0.518     | 0.512  | 0.301  |
| A014313_01 | At4g39520 | GTP-binding - like protein; protein id: At4g39520.1            | 0.232     | -0.007    | -0.102 | 0.111  |
| A014317_01 | At4g24420 | RRM-containing protein; protein id: At4g24420.1                | 0.148     | 0.118     | 0.649  | 0.311  |
| A014319_01 | At4g29500 | X-Pro dipeptidase - like protein (fragment); protein i         | -0.469    | -0.244    | -0.134 | 0.187  |
| A014323_01 | At4g34860 | invertase - like protein; protein id: At4g34860.1              | 0.215     | 0.177 NA  |        | 0.472  |
| A014325_01 | At4g13040 | hypothetical protein; protein id: At4g13040.1                  | -0.786 NA | NA        |        | -0.635 |
| A014331_01 | At4g08310 | putative protein; protein id: At4g08310.1                      | 0.601 NA  | NA        |        | 0.697  |

|            |           |                                                                                     |        |        |        |        |
|------------|-----------|-------------------------------------------------------------------------------------|--------|--------|--------|--------|
| A014339_01 | At4g20870 | fatty acid hydroxylase - like protein; protein id: At4g20870.1                      | 0.581  | 0.57   | 0.429  | 0.457  |
| A014344_01 | At4g31560 | putative protein; protein id: At4g31560.1                                           | -0.251 | -0.21  | -0.165 | -1.43  |
| A014441_01 | At4g28980 | cyclin-dependent kinase F;1; protein id: At4g28980.1                                | 0.017  | NA     | -0.388 | -0.547 |
| A014442_01 | At4g09570 | calmodulin-domain protein kinase CDPK isoform 4                                     | 0.474  | 0.514  | 0.094  | 0.517  |
| A014443_01 | At4g02720 | unknown protein; protein id: At4g02720.1                                            | -0.222 | -0.346 | 0.062  | -0.342 |
| A014448_01 | At4g02820 | hypothetical protein; protein id: At4g02820.1                                       | 0.154  | 0.079  | NA     | 0.022  |
| A014449_01 | At4g22240 | fibrillin precursor-like protein; protein id: At4g22240.1                           | 0.482  | -0.121 | 0.293  | 0.898  |
| A014455_01 | At4g37540 | putative protein; protein id: At4g37540.1                                           | -0.625 | -0.293 | -0.349 | -0.794 |
| A014457_01 | At4g31510 | putative protein; protein id: At4g31510.1                                           | -1.256 | NA     | -0.773 | -0.876 |
| A014459_01 | At4g31480 | putative protein; protein id: At4g31480.1                                           | 0.451  | -0.017 | -0.373 | 0.004  |
| A014462_01 | At4g00170 | putative proline-rich protein; protein id: At4g00170.1                              | 0.059  | -0.031 | 0.194  | 0.038  |
| A014463_01 | At4g15940 | isomerase like protein; protein id: At4g15940.1                                     | -0.621 | -0.792 | -0.391 | -0.218 |
| A014464_01 | At4g03210 | xyloglucan endotransglycosylase, putative; protein id: At4g03210.1                  | 1.652  | 1.155  | 1.541  | 2.674  |
| A014468_01 | At4g08150 | KNAT1 homeobox-like protein; protein id: At4g08150.1                                | -0.424 | -0.379 | -0.282 | -0.649 |
| A014469_01 | At4g28490 | leucine-rich repeat transmembrane protein kinase, putative; protein id: At4g28490.1 | -2.491 | -3.088 | -1.44  | -2.224 |
| A014472_01 | At4g27120 | putative protein; protein id: At4g27120.2                                           | 0.248  | -0.201 | NA     | -0.37  |
| A014473_01 | At4g16410 | expressed protein; protein id: At4g16410.1                                          | -0.548 | -0.475 | -0.608 | -0.999 |
| A014474_01 | At4g08500 | MEKK1/MAP kinase kinase kinase; protein id: At4g08500.1                             | -0.917 | -0.621 | -0.627 | -0.756 |
| A014486_01 | At4g12110 | putative C-4 sterol methyl oxidase; protein id: At4g12110.1                         | 0.407  | 0.514  | 0.366  | 0.88   |
| A014493_01 | At4g32410 | cellulose synthase catalytic subunit (RSW1); protein id: At4g32410.1                | -0.006 | -0.426 | -0.276 | -0.255 |
| A014495_01 | At4g26870 | putative aspartate-tRNA ligase; protein id: At4g26870.1                             | 0.351  | 0.172  | 0.282  | 0.382  |
| A014497_01 | At4g24210 | putative protein; protein id: At4g24210.1                                           | -0.249 | -0.246 | 0.258  | -0.049 |
| A014501_01 | At4g32470 | ubiquinol-cytochrome c reductase - like protein; protein id: At4g32470.1            | -0.234 | -0.462 | 0.159  | -0.14  |
| A014502_01 | At4g25590 | actin depolymerizing factor-like protein; protein id: At4g25590.1                   | -0.562 | -0.442 | NA     | NA     |
| A014503_01 | At4g04020 | putative fibrillin; protein id: At4g04020.1                                         | 0.639  | 0.515  | 0.361  | 0.9    |
| A014509_01 | At4g29070 | expressed protein; protein id: At4g29070.1                                          | -0.687 | -0.794 | NA     | -1.142 |
| A014510_01 | At4g25450 | ABC transporter family protein; protein id: At4g25450.1                             | -0.651 | -0.257 | -0.486 | -0.22  |
| A014514_01 | At4g19150 | ankyrin-like protein; protein id: At4g19150.1                                       | 0.529  | 0.405  | 0.306  | 0.106  |
| A014516_01 | At4g31040 | expressed protein; protein id: At4g31040.1                                          | -0.043 | -0.277 | -0.485 | -0.695 |
| A014519_01 | At4g04460 | putative aspartic protease; protein id: At4g04460.1                                 | -2.611 | -2.594 | -1.265 | -2.411 |
| A014520_01 | At4g00500 | calmodulin-binding heat-shock protein; protein id: At4g00500.1                      | -0.547 | -0.68  | NA     | NA     |
| A014522_01 | At4g30960 | putative protein kinase; protein id: At4g30960.1                                    | -0.93  | -1.299 | -0.507 | -0.376 |
| A014526_01 | At4g14930 | expressed protein; protein id: At4g14930.1                                          | -2.212 | -2.148 | -0.478 | -0.948 |
| A014529_01 | At4g33890 | hypothetical protein; protein id: At4g33890.1                                       | NA     | NA     | NA     | -0.122 |
| A014531_01 | At4g18040 | translation initiation factor eIF4E; protein id: At4g18040.1                        | 0.575  | 0.51   | 0.645  | 0.975  |
| A014532_01 | At4g04850 | putative potassium transporter; protein id: At4g04850.1                             | -0.406 | NA     | -1.18  | -1.102 |
| A014537_01 | At4g09730 | DEAD/DEAH box RNA helicase protein, putative; protein id: At4g09730.1               | 0.916  | 0.382  | 0.062  | 0.321  |
| A014539_01 | At4g16130 | galactokinase like protein; protein id: At4g16130.1                                 | -0.639 | -1.229 | -0.544 | -0.753 |
| A014543_01 | At4g20280 | putative protein; protein id: At4g20280.1                                           | 0.035  | -0.01  | 0.185  | 0.29   |
| A014544_01 | At4g25880 | putative pumilio protein                                                            | -0.436 | -0.676 | -0.546 | -0.157 |
| A014548_01 | At4g12780 | auxilin-like protein; protein id: At4g12780.1                                       | 0.004  | NA     | -0.246 | -0.75  |
| A014550_01 | At4g05160 | 4-coumarate--CoA ligase - like protein; protein id: At4g05160.1                     | -0.59  | -0.848 | -0.399 | -0.135 |
| A014556_01 | At4g04350 | putative leucyl tRNA synthetase; protein id: At4g04350.1                            | 0.522  | 0.509  | NA     | 1.033  |
| A014560_01 | At4g05440 | D123 -like protein; protein id: At4g05440.1                                         | NA     | 0.408  | 0.746  | 0.586  |
| A014570_01 | At4g10320 | isoleucine-tRNA ligase - like protein; protein id: At4g10320.1                      | 0.653  | 0.084  | 0.292  | 0.799  |
| A014571_01 | At4g28270 | putative protein; protein id: At4g28270.1                                           | -2.218 | -2.054 | -1.07  | -1.504 |
| A014574_01 | At4g30890 | ubiquitin-specific protease 24 (UBP24), putative; protein id: At4g30890.1           | 0.064  | 0.145  | -0.285 | 0.061  |
| A014576_01 | At4g32770 | putative protein; protein id: At4g32770.1                                           | -0.158 | -0.274 | -0.675 | -0.992 |
| A014577_01 | At4g02930 | mitochondrial elongation factor Tu; protein id: At4g02930.1                         | 1.416  | 1.245  | 1.296  | 1.514  |
| A014580_01 | At4g20980 | translation initiation factor eIF3 - like protein; protein id: At4g20980.1          | 0.51   | 0.393  | 0.42   | 0.566  |
| A014581_01 | At4g30530 | putative protein; protein id: At4g30530.1                                           | -1.318 | -1.755 | -0.781 | -0.865 |
| A014587_01 | At4g34120 | putative protein; protein id: At4g34120.1                                           | -0.58  | -0.427 | -0.36  | 0.265  |
| A014590_01 | At4g11740 | putative protein; protein id: At4g11740.1                                           | -0.527 | NA     | -0.448 | -0.639 |
| A014594_01 | At4g34460 | G-protein beta-subunit (transducin) (AGB1); protein id: At4g34460.1                 | -0.288 | -0.572 | -0.354 | -0.441 |
| A014596_01 | At4g19410 | pectinacetyltransferase, putative; protein id: At4g19410.1                          | 0.418  | 0.175  | -0.2   | -0.41  |
| A014597_01 | At4g19240 | hypothetical protein; protein id: At4g19240.1                                       | -0.146 | -0.27  | 0.152  | 0.387  |
| A014600_01 | At4g17520 | nuclear RNA binding protein A-like protein; protein id: At4g17520.1                 | 0.592  | 0.619  | 0.453  | NA     |
| A014601_01 | At4g24220 | putative protein; protein id: At4g24220.1                                           | -1.022 | -0.885 | -0.611 | -1.211 |
| A014611_01 | At4g01070 | putative flavonol glucosyltransferase; protein id: At4g01070.1                      | -2.536 | -2.85  | -1.038 | -1.468 |
| A014612_01 | At4g13010 | putative protein; protein id: At4g13010.1                                           | -1.091 | -1.539 | -0.727 | -0.798 |
| A014615_01 | At4g25740 | putative ribosomal protein S10; protein id: At4g25740.1                             | 0.705  | 0.783  | 0.691  | 0.72   |
| A014621_01 | At4g35420 | putative protein; protein id: At4g35420.1                                           | -0.082 | NA     | NA     | NA     |
| A014622_01 | At4g27990 | A.t. histone deacetylase mRNA, complete cds                                         | -0.945 | -0.76  | -0.249 | -1.514 |
| A014628_01 | At4g35360 | putative protein; protein id: At4g35360.1                                           | 0.02   | -0.228 | -0.101 | 0.134  |
| A014629_01 | At4g35240 | putative protein; protein id: At4g35240.1                                           | -0.548 | -0.632 | -0.108 | -0.656 |
| A014632_01 | At4g34620 | putative ribosomal protein S16; protein id: At4g34620.1                             | 1.135  | 0.678  | 0.605  | 1.195  |
| A014633_01 | At4g14360 | ankyrin like protein; protein id: At4g14360.1                                       | 0.619  | 0.452  | -0.216 | -0.121 |
| A014634_01 | At4g39730 | putative protein; protein id: At4g39730.1                                           | 1.357  | 1.188  | 0.858  | 1.02   |



|            |           |                                                         |           |           |        |        |
|------------|-----------|---------------------------------------------------------|-----------|-----------|--------|--------|
| A014636_01 | At4g35790 | putative protein; protein id: At4g35790.1               | -0.04     | -0.075    | -0.065 | 0.175  |
| A014637_01 | At4g03390 | leucine-rich repeat transmembrane protein kinase, f     | 0.013     | -0.435    | -0.439 | -0.216 |
| A014639_01 | At4g10090 | expressed protein; protein id: At4g10090.1              | 0.109     | 0.14      | 0.493  | 0.421  |
| A014643_01 | At4g30190 | putative H <sup>+</sup> -transporting ATPase            | -0.624    | -0.33     | 0.306  | 0.1    |
| A014644_01 | At4g14110 | COP9 protein; protein id: At4g14110.1                   | 0.17      | 0.27      | 0.296  | 0.22   |
| A014646_01 | At4g11960 | putative protein; protein id: At4g11960.1               | -0.728    | -1.069    | -1.197 | -1.306 |
| A014650_01 | At4g14300 | heterogeneous nuclear ribonucleoprotein(hnRNP), f       | 0.526     | 0.618     | -0.184 | -0.316 |
| A014654_01 | At4g14410 | bHLH protein; protein id: At4g14410.1                   | -0.731    | -0.768    | -0.126 | -0.536 |
| A014655_01 | At4g14420 | elicitor like protein; protein id: At4g14420.1          | 1.154     | 0.896     | 0.442  | 0.6    |
| A014660_01 | At4g14510 | hypothetical protein; protein id: At4g14510.1           | 0.054     | 0.143 NA  | NA     |        |
| A014661_01 | At4g34630 | putative protein; protein id: At4g34630.1               | -0.799    | -1.003    | 0.564  | 0.431  |
| A014662_01 | At4g14540 | CCAAT-binding transcription factor subunit A(CBF-)      | -0.483    | -0.511    | 0.08   | -0.54  |
| A014667_01 | At4g27390 | putative protein; protein id: At4g27390.1               | -1.053    | -0.759    | -0.738 | -0.76  |
| A014669_01 | At4g12250 | nucleotide sugar epimerase -like protein; protein id:   | -0.168    | -0.091    | -0.047 | 0.036  |
| A014675_01 | At4g17600 | Lil3 protein; protein id: At4g17600.1                   | 0.47      | 0.608     | 0.536  | 0.295  |
| A014676_01 | At4g29840 | threonine synthase; protein id: At4g29840.1             | 0.35      | 0.363     | 0.261  | 0.327  |
| A014677_01 | At4g14920 | hypothetical protein; protein id: At4g14920.1           | 0.434     | 0.283 NA  |        | 0.122  |
| A014682_01 | At4g22220 | iron-sulfur cofactor synthesis protein nifUomolog       | -0.14     | -0.341    | -0.197 | -0.261 |
| A014684_01 | At4g31570 | putative protein; protein id: At4g31570.1               | -0.408    | -0.491    | -0.116 | -0.586 |
| A014685_01 | At4g21180 | putative protein; protein id: At4g21180.1               | 0.669     | 0.574 NA  |        | 0.332  |
| A014688_01 | At4g37610 | putative protein; protein id: At4g37610.1               | -2.573 NA |           | -1.043 | -1.033 |
| A014699_01 | At4g33090 | aminopeptidase- like protein; protein id: At4g33090.    | -0.588    | -0.861    | -0.607 | -0.603 |
| A014701_01 | At4g39970 | putative protein; protein id: At4g39970.1               | -0.248    | 0.341     | -0.14  | -0.325 |
| A014702_01 | At4g33050 | putative protein; protein id: At4g33050.1               | -2.95 NA  |           | -1.91  | -2.662 |
| A014704_01 | At4g39260 | glycine-rich RNA-binding protein 8 (GRP8); protein i    | -0.284    | 0.172     | 0.13   | 0.141  |
| A014705_01 | At4g35750 | putative protein; protein id: At4g35750.1               | -2.304    | -2.78     | -1.27  | -1.718 |
| A014706_01 | At4g15770 | hypothetical protein; protein id: At4g15770.1           | 0.766     | 0.825     | 0.717  | 0.821  |
| A014707_01 | At4g15780 | SYBL1 like protein; protein id: At4g15780.1             | -0.031    | -0.106    | -0.213 | -0.235 |
| A014708_01 | At4g02560 | LUMINIDEPENDENS protein; protein id: At4g02560          | 0.065     | -0.312 NA |        | 0.146  |
| A014709_01 | At4g15810 | hypothetical protein; protein id: At4g15810.1           | -0.242    | -0.427    | -0.296 | -0.256 |
| A014716_01 | At4g13940 | adenosylhomocysteinase; protein id: At4g13940.1         | 0.745     | 0.387     | 0.735  | 1.503  |
| A014717_01 | At4g35530 | putative protein; protein id: At4g35530.1               | -0.285    | -0.032    | 0.217  | 0.218  |
| A014720_01 | At4g38740 | peptidylprolyl isomerase ROC1; protein id: At4g387.     | 0.096     | -0.199    | 0.4    | 1.178  |
| A014721_01 | At4g11010 | nucleoside diphosphate kinase 3 (ndpk3); protein id     | 1.201     | 0.825     | 0.732  | 0.972  |
| A014722_01 | At4g35000 | ascorbate peroxidase, putative (APX); protein id: At.   | -0.224    | -0.393    | -0.203 | -0.369 |
| A014723_01 | At4g25130 | protein-methionine-S-oxide reductase                    | -0.252    | 0.008     | 0.027  | -0.66  |
| A014724_01 | At4g16240 | glycine-rich protein homolog; protein id: At4g16240.    | -1.455    | -0.501 NA |        | -0.299 |
| A014725_01 | At4g35100 | plasma membrane intrinsic protein (SIMIP)               | -0.232    | -0.096    | 0.136  | 0.599  |
| A014726_01 | At4g16320 | hypothetical protein; protein id: At4g16320.1           | -0.319    | -0.624 NA |        | -0.454 |
| A014728_01 | At4g16390 | salt-inducible protein homolog; protein id: At4g1639    | 0.233     | 0.498     | 0.348  | 0.435  |
| A014730_01 | At4g16420 | transcriptional adaptor like protein; protein id: At4g1 | -0.052    | -0.096    | 0.193  | 0.067  |
| A014732_01 | At4g17486 | putative protein; protein id: At4g17486.1               | 0.278     | 0.116     | 0.337  | 0.352  |
| A014733_01 | At4g16830 | nuclear antigen homolog; protein id: At4g16830.1        | -0.781    | -0.822    | -0.579 | -0.932 |
| A014738_01 | At4g31300 | 20S proteasome beta subunit A (PBA1); protein id:       | 0.142     | 0.136     | 0.344  | 0.476  |
| A014742_01 | At4g33670 | putative protein; protein id: At4g33670.1               | 0.337     | 0.33      | -0.193 | -0.293 |
| A014743_01 | At4g20850 | putative protein; protein id: At4g20850.1               | -0.111    | -0.65     | -0.538 | -0.498 |
| A014745_01 | At4g39910 | ubiquitin-specific protease (AtUBP3)                    | -0.923    | -0.327    | -0.433 | -0.194 |
| A014746_01 | At4g27960 | E2, ubiquitin-conjugating enzyme 9 (UBC9); protein      | -1.363    | -0.781    | -0.832 | -0.863 |
| A014750_01 | At4g39330 | cinnamyl-alcohol dehydrogenase CAD1; protein id:        | 1.106     | 0.669     | 0.836  | 1.764  |
| A014751_01 | At4g33000 | putative protein (fragment); protein id: At4g33000.1    | -0.057 NA |           | -0.328 | -0.401 |
| A014752_01 | At4g38710 | putative protein; protein id: At4g38710.1               | 0.046 NA  |           | 0.229  | -0.01  |
| A014754_01 | At4g34190 | putative protein; protein id: At4g34190.1               | 0.129     | 0.056     | -0.243 | -0.618 |
| A014755_01 | At4g21790 | putative protein; protein id: At4g21790.1               | -0.12     | -0.06     | -0.494 | -0.659 |
| A014758_01 | At4g35770 | senescence-associated protein sen1; protein id: At4     | -3.499    | -3.76     | -0.955 | -2.427 |
| A014759_01 | xxxx      | b/t disease resistance protein (TIR-NBS class), puta    | -0.906    | -0.957    | -1.354 | -1.118 |
| A014760_01 | At4g22410 | putative protein; protein id: At4g22410.1               | 0.304     | -0.078    | 0.052  | 0.206  |
| A014761_01 | At4g19880 | putative protein; protein id: At4g19880.1               | -0.072    | -0.518    | -0.366 | -0.278 |
| A014762_01 | At4g34910 | DEAD/DEAH box RNA helicase protein, putative; pr        | 0.139     | 0.272     | 0.235  | 0.145  |
| A014763_01 | At4g38970 | putative fructose-bisphosphate aldolase; protein id:    | -0.699    | -0.726    | -0.248 | -0.346 |
| A014765_01 | At4g17080 | hypothetical protein; protein id: At4g17080.1           | -1.298    | -1.33     | -0.701 | -1.094 |
| A014767_01 | At4g02510 | putative chloroplast outer envelope 86-like protein; f  | -0.392    | -0.367    | -0.268 | -0.645 |
| A014769_01 | At4g02380 | coded for by A. thaliana cDNA T46835; protein id: A     | -1.327    | -1.325    | -0.626 | -1.551 |
| A014771_01 | At4g00100 | putative ribosomal protein S13; protein id: At4g0010    | 0.535     | 0.536     | 0.603  | 0.816  |
| A014774_01 | At4g17360 | phosphoribosylglycinamide formyltransferase-like pi     | -0.116    | -0.196    | -0.375 | -0.17  |
| A014777_01 | At4g24440 | putative transcription factor IIA small subunit         | -0.092    | 0.303     | 0.406  | -0.208 |
| A014780_01 | At4g38130 | Histone deacetylase; protein id: At4g38130.1            | 0.298     | 0.206     | 0.468  | 0.573  |
| A014783_01 | At4g23100 | gamma-glutamylcysteine synthetase; protein id: At4      | 0.277     | -0.024    | -0.363 | -0.106 |
| A014785_01 | At4g13640 | putative protein; protein id: At4g13640.1               | 0.471     | 0.312     | 0.109  | 0.059  |

|            |           |                                                                         |           |           |           |        |
|------------|-----------|-------------------------------------------------------------------------|-----------|-----------|-----------|--------|
| A014789_01 | At4g23670 | major latex protein (MLP)-related; protein id: At4g23670.1              | -0.236    | -0.852    | 0.141     | 0.378  |
| A014793_01 | At4g28260 | putative protein; protein id: At4g28260.1                               | -0.52     | -0.347    | -0.203    | -0.65  |
| A014794_01 | At4g17230 | scarecrow-like 13 (SCL13); protein id: At4g17230.1                      | -0.306    | -0.04     | -0.35     | -0.762 |
| A014798_01 | At4g14430 | carnitine racemase like protein; protein id: At4g14430.1                | -1.136 NA |           | 0.037     | -0.898 |
| A014799_01 | At4g02290 | glycosyl hydrolase family 9; protein id: At4g02290.1                    | 1.793     | 1.525     | 1.377     | 2.38   |
| A014800_01 | At4g28610 | putative protein; protein id: At4g28610.1                               | -0.256    | -0.436    | -0.192    | -0.296 |
| A014801_01 | At4g25620 | unknown protein; protein id: At4g25620.1                                | -1.016    | -1.027    | 0.084     | 0.015  |
| A014802_01 | At4g24660 | putative protein; protein id: At4g24660.1                               | -0.746    | -0.525 NA |           | -0.581 |
| A014805_01 | At4g29220 | pyrophosphate-dependent phosphofructo-1-kinase-1                        | -0.15 NA  |           | -0.441    | -0.018 |
| A014806_01 | At4g36980 | putative protein; protein id: At4g36980.1                               | -0.269    | -0.338    | 0.306     | -0.283 |
| A014811_01 | At4g29340 | profilin 3; protein id: At4g29340.1                                     | -0.7      | -0.564 NA | NA        |        |
| A014819_01 | At4g30310 | putative protein; protein id: At4g30310.1                               | -0.211    | -0.312    | 0.012     | 0.318  |
| A014821_01 | At4g24550 | clathrin coat assembly like protein; protein id: At4g24550.1            | 0.111     | -0.275    | -0.171    | 0.255  |
| A014825_01 | At4g38690 | putative protein; protein id: At4g38690.1                               | NA        | NA        | 0.147     | -0.367 |
| A014832_01 | At4g25570 | putative protein; protein id: At4g25570.1                               | -0.478    | -0.461    | -0.416    | -0.797 |
| A014833_01 | At4g23640 | putative potassium transport protein (TRH1); protein id: At4g23640.1    | -0.115 NA | NA        |           | -0.668 |
| A014835_01 | At4g30630 | putative protein; protein id: At4g30630.1                               | -0.851    | -0.903 NA |           | -0.625 |
| A014838_01 | At4g23740 | leucine-rich repeat transmembrane protein kinase, family 1              | 0.758     | 0.737     | 0.626     | 1.049  |
| A014842_01 | At4g26860 | putative proline synthetase associated protein; protein id: At4g26860.1 | -0.878    | -0.754    | -0.849    | -0.878 |
| A014848_01 | At4g26940 | Avr9 elicitor response like protein; protein id: At4g26940.1            | 0.187 NA  |           | -0.289    | -0.242 |
| A014850_01 | At4g27050 | putative protein; protein id: At4g27050.1                               | -0.181    | -0.164    | -0.001    | -0.034 |
| A014851_01 | At4g34260 | hypothetical protein; protein id: At4g34260.1                           | 1.388     | 0.71 NA   |           | 0.279  |
| A014855_01 | At4g34320 | hypothetical protein common family; protein id: At4g34320.1             | -2.686 NA |           | -0.99     | -1.748 |
| A014858_01 | At4g33666 | expressed protein; protein id: At4g33666.1                              | -2.345    | -1.839    | -0.943    | -3.132 |
| A014860_01 | At4g29820 | mRNA cleavage factor subunit - like protein; protein id: At4g29820.1    | -1.049    | -0.794    | -0.73     | -1.037 |
| A014862_01 | At4g34370 | putative protein; protein id: At4g34370.1                               | -0.654    | -0.683 NA |           | -0.411 |
| A014867_01 | At4g36740 | homeodomain protein; protein id: At4g36740.1                            | -2.341 NA |           | 0.188     | -1.444 |
| A014874_01 | At4g36920 | apetala2 protein; protein id: At4g36920.1                               | -0.11     | -0.316 NA |           | 0.317  |
| A014875_01 | At4g24930 | thylakoid luminal 17.9 kDa protein, chloroplast precursor               | 0.622     | 0.789     | 0.462     | -0.161 |
| A014876_01 | At4g11330 | MAP kinase (ATMPK5); protein id: At4g11330.1                            | -1.952 NA | NA        | NA        | NA     |
| A014888_01 | At4g37210 | putative protein; protein id: At4g37210.1                               | 0.495     | 0.5       | 0.567     | 0.744  |
| A014892_01 | At4g37310 | cytochrome P450-like protein                                            | NA        | NA        | NA        | -2.35  |
| A014899_01 | At4g03280 | putative component of cytochrome B6-F complex; protein id: At4g03280.1  | -0.444    | -0.458    | -0.26     | -0.393 |
| A014904_01 | At4g02150 | AtKAP alpha; protein id: At4g02150.1                                    | 0.553     | 0.602     | 0.667     | 0.914  |
| A014914_01 | At4g39710 | FKBP-type peptidyl-prolyl cis-trans isomerase, putative                 | 0.357     | 0.411     | 0.201     | 0.11   |
| A014915_01 | At4g19830 | FKBP-type peptidyl-prolyl cis-trans isomerase; protein id: At4g19830.1  | NA        | NA        | 0.062     | -0.652 |
| A014919_01 | At4g38060 | putative protein; protein id: At4g38060.1                               | -1.263 NA |           | -0.406    | -0.532 |
| A014925_01 | At4g35550 | homeodomain - like protein; protein id: At4g35550.1                     | 0.57      | 0.457     | 0.308     | 0.618  |
| A014927_01 | At4g03290 | putative calmodulin; protein id: At4g03290.1                            | -0.718    | -0.447    | -0.968    | -1.977 |
| A014928_01 | At4g03320 | putative chloroplast protein import component; protein id: At4g03320.1  | -1.327    | -1.253    | -0.618    | -0.961 |
| A014929_01 | At4g25650 | putative protein; protein id: At4g25650.1                               | -0.967    | -0.954    | -0.983    | -1.157 |
| A014931_01 | At4g25670 | expressed protein; protein id: At4g25670.1                              | -0.209    | -0.317    | -0.133    | -0.16  |
| A014932_01 | At4g28030 | unknown protein; protein id: At4g28030                                  | -0.707    | -0.917    | -0.638    | -1.267 |
| A014933_01 | At4g10180 | deetiolated1 (DET1) light signal transduction protein                   | 0.1       | -0.099    | 0.297     | 0.487  |
| A014935_01 | At4g35540 | putative protein; protein id: At4g35540.1                               | -0.241    | -0.357 NA |           | -0.426 |
| A014936_01 | At4g36410 | E2, ubiquitin-conjugating enzyme 17 (UBC17); protein id: At4g36410.1    | -1.297 NA |           | -0.828 NA |        |
| A014938_01 | At4g14800 | 20S proteasome beta subunit D2 (PBD2); protein id: At4g14800.1          | 0.538     | 0.448     | 0.548     | 0.569  |
| A014939_01 | At4g25900 | possible apospory-associated like protein                               | -1.318    | -1.42     | -1.248    | -1.267 |
| A014942_01 | At4g05530 | coded for by A. thaliana cDNA Z18000; protein id: At4g05530.1           | -0.047    | -0.496    | 0.222     | 0.163  |
| A014945_01 | At4g14680 | ATP-sulfurylase; protein id: At4g14680.1                                | -0.677    | -0.538    | 0.044     | 0.22   |
| A014947_01 | At4g03510 | E3 ubiquitin ligase, RMA1; protein id: At4g03510.1                      | -1.59     | -1.268    | -0.872    | -1.268 |
| A014948_01 | At4g28060 | putative protein; protein id: At4g28060.1                               | -0.49     | -0.337    | 0.005     | -0.413 |
| A014951_01 | At4g30450 | glycine-rich protein; protein id: At4g30450.1                           | -0.592    | -0.217    | 0.063     | -0.435 |
| A014952_01 | At4g22120 | putative protein; protein id: At4g22120.1                               | -0.333    | -0.153    | -0.032    | 0.229  |
| A014953_01 | At4g19450 | putative protein; protein id: At4g19450.1                               | -0.558 NA | NA        |           | -0.358 |
| A014954_01 | At4g26850 | A.t. DNA chromosome 4, BAC clone T5L19 (ESSA)                           | -1.176    | -1.174    | -0.129    | 0.349  |
| A014955_01 | At4g27480 | N-acetylglucosaminyltransferase family (Core-2/I-B4)                    | -1.223    | -1.101 NA |           | -0.812 |
| A014965_01 | At4g04040 | putative phosphofructokinase beta subunit; protein id: At4g04040.1      | 0.568     | 0.186     | 0.671     | 0.909  |
| A014971_01 | At4g31750 | protein phosphatase 2C (PP2C), putative; protein id: At4g31750.1        | -0.184    | -0.29     | -0.1      | -0.099 |
| A014974_01 | At4g22310 | putative protein; protein id: At4g22310.1                               | 0.072     | 0.214 NA  | NA        |        |
| A014976_01 | At4g08180 | putative protein; protein id: At4g08180.1                               | -0.376    | -0.474 NA |           | -1.248 |
| A014979_01 | At4g27380 | expressed protein; protein id: At4g27380.1                              | 0.32      | 0.444     | 0.121     | -0.036 |
| A014980_01 | At4g17620 | hypothetical protein; protein id: At4g17620.1                           | 0.044 NA  | NA        |           | -0.326 |
| A014982_01 | At4g27350 | putative protein; protein id: At4g27350.1                               | -0.303    | -0.043    | -0.169    | -0.297 |
| A014984_01 | At4g05070 | coded for by A. thaliana cDNA T44741; protein id: At4g05070.1           | -1.981    | -1.332    | -1.056    | -2.197 |
| A014986_01 | At4g22330 | putative protein; protein id: At4g22330.1                               | -0.684    | -0.329    | -0.392    | -0.472 |
| A014989_01 | At4g26620 | sucrase-like protein; protein id: At4g26620.1                           | -0.085    | 0.005     | 0.226     | 0.328  |
| A014991_01 | At4g04640 | coded for by A. thaliana cDNA AA041141; protein id: At4g04640.1         | -0.546    | -0.595    | -0.766    | -0.56  |

|            |           |                                                           |        |        |        |        |
|------------|-----------|-----------------------------------------------------------|--------|--------|--------|--------|
| A014996_01 | At4g10340 | light-harvesting chlorophyll a/b binding protein; prote   | -0.58  | -0.439 | -0.368 | -0.231 |
| A015002_01 | At4g11800 | putative protein; protein id: At4g11800.1                 | 0.089  | 0.072  | 0.247  | 0.572  |
| A015008_01 | At4g24740 | protein kinase (AFC2); protein id: At4g24740.1            | -0.509 | -0.492 | 0.12   | -0.106 |
| A015009_01 | At4g04930 | putative fatty acid desaturase; protein id: At4g04930     | -0.518 | -0.531 | -0.785 | NA     |
| A015011_01 | At4g11920 | fizzy-related (FZR), putative; protein id: At4g11920.     | -0.066 | NA     | NA     | 0.353  |
| A015012_01 | At4g34700 | putative protein; protein id: At4g34700.1                 | 0.689  | 0.49   | 0.448  | 0.332  |
| A015013_01 | At4g24990 | expressed protein; protein id: At4g24990.1                | -1.52  | -1.262 | -0.993 | -0.764 |
| A015025_01 | At4g39510 | cytochrome p450 family; protein id: At4g39510.1           | 0.144  | -0.121 | 0.456  | 0.382  |
| A015035_01 | At4g11790 | expressed protein; protein id: At4g11790.1                | 0.174  | NA     | NA     | -0.107 |
| A015041_01 | At4g24270 | putative protein; protein id: At4g24270.1                 | 0.903  | 0.74   | 0.398  | 0.556  |
| A015042_01 | At4g37920 | putative protein; protein id: At4g37920.1                 | 0.518  | NA     | -0.016 | 0.385  |
| A015044_01 | At4g21660 | spliceosome associated protein - like; protein id: At     | 0.13   | -0.028 | -0.274 | -0.102 |
| A015047_01 | At4g24380 | putative protein; protein id: At4g24380.1                 | 0.484  | 0.491  | 0.427  | 0.416  |
| A015050_01 | At4g02200 | drought-induced-19-like 1; protein id: At4g02200.1        | 0.017  | -0.061 | 0.123  | -0.007 |
| A015054_01 | At4g25520 | putative protein; protein id: At4g25520.1                 | NA     | NA     | -0.767 | -1.011 |
| A015056_01 | At4g21160 | putative protein; protein id: At4g21160.1                 | -0.3   | -0.569 | -0.303 | -0.088 |
| A015062_01 | At4g38470 | protein kinase like protein; protein id: At4g38470.1      | -0.75  | -1.076 | -1.043 | -1.324 |
| A015066_01 | At4g29590 | putative protein; protein id: At4g29590.1                 | 0.303  | 0.123  | -0.016 | 0.077  |
| A015067_01 | At4g07990 | hypothetical protein; protein id: At4g07990.1             | -0.03  | NA     | NA     | -0.414 |
| A015071_01 | At4g25100 | iron superoxide dismutase (FSD1); protein id: At4g2       | -3.033 | -3.24  | -0.947 | -0.768 |
| A015072_01 | At4g39200 | ribosomal protein S25; protein id: At4g39200.1            | 0.867  | 0.807  | 0.757  | 0.259  |
| A015075_01 | At4g01050 | expressed protein; protein id: At4g01050.1                | 0.446  | 0.165  | -0.741 | -0.746 |
| A015077_01 | At4g26110 | nucleosome assembly protein I-like protein; protein       | 0.706  | 0.464  | 0.555  | 0.761  |
| A015079_01 | At4g24805 | expressed protein; protein id: At4g24805.1                | NA     | NA     | -0.063 | -0.514 |
| A015081_01 | At4g26570 | calcineurin B-like protein 3; protein id: At4g26570.1, NA | NA     | NA     | NA     | -0.505 |
| A015082_01 | At4g32590 | expressed protein; protein id: At4g32590.1                | 0.235  | 0.184  | -0.135 | -0.73  |
| A015083_01 | At4g32620 | putative protein; protein id: At4g32620.1                 | -0.012 | -0.2   | -0.044 | 0.011  |
| A015084_01 | At4g34390 | extra-large G-protein - like; protein id: At4g34390.1     | -0.737 | -1.044 | -0.696 | -1.204 |
| A015088_01 | At4g34920 | putative protein; protein id: At4g34920.1                 | -1.141 | -1.069 | -0.555 | -0.558 |
| A015090_01 | At4g32720 | RRM-containing protein; protein id: At4g32720.1           | 0.31   | 0.159  | 0.355  | 0.58   |
| A015092_01 | At4g39870 | putative protein; protein id: At4g39870.1                 | -0.016 | -0.26  | -0.149 | -0.174 |
| A015093_01 | At4g20150 | putative protein; protein id: At4g20150.1                 | 0.458  | 0.339  | 0.305  | -0.082 |
| A015095_01 | At4g23820 | polygalacturonase, putative; protein id: At4g23820.1      | 1.752  | 1.549  | 1.281  | 1.421  |
| A015096_01 | At4g08940 | hypothetical protein; protein id: At4g08940.1             | 0.161  | 0.054  | NA     | NA     |
| A015097_01 | At4g08960 | putative phosphotyrosyl phosphatase activator prote       | 0.118  | 0.286  | 0.31   | 0.815  |
| A015098_01 | At4g12990 | putative protein; protein id: At4g12990.1                 | -0.606 | NA     | NA     | NA     |
| A015102_01 | At4g33010 | P-Protein - like protein; protein id: At4g33010.1         | -0.478 | -1.247 | -0.313 | 0.22   |
| A015105_01 | At4g04955 | expressed protein; protein id: At4g04955.1                | -1.56  | -2.012 | -1.683 | -2.09  |
| A015108_01 | At4g02530 | chloroplast thylakoid lumen protein; protein id: At4g     | 0.874  | 0.684  | 0.191  | 0.116  |
| A015109_01 | At4g35950 | rac-like GTP-binding protein, putative; protein id: At    | 0.888  | NA     | 0.634  | 0.495  |
| A015111_01 | At4g09180 | putative protein; protein id: At4g09180.1                 | -0.575 | NA     | NA     | -0.653 |
| A015114_01 | At4g27130 | translation initiation factor; protein id: At4g27130.1    | -0.252 | -0.342 | -0.071 | 0.171  |
| A015118_01 | At4g34280 | putative protein; protein id: At4g34280.1                 | -0.725 | -0.369 | NA     | -0.166 |
| A015121_01 | At4g21610 | Lsd1 like protein; protein id: At4g21610.1                | 0.025  | 0.173  | NA     | NA     |
| A015124_01 | At4g20410 | putative protein; protein id: At4g20410.1                 | -0.234 | -0.437 | -0.202 | 0.005  |
| A015125_01 | At4g26210 | putative protein; protein id: At4g26210.1                 | 0.715  | 0.613  | 0.604  | 0.433  |
| A015126_01 | At4g16660 | HSP like protein; protein id: At4g16660.1                 | 1.062  | 0.747  | 0.421  | 0.659  |
| A015128_01 | At4g32551 | putative protein; protein id: At4g32551.1                 | 0.182  | NA     | NA     | -0.19  |
| A015129_01 | At4g25080 | putative magnesium-protoporphyrin IXethyltransfera        | 0.049  | -0.097 | -0.318 | -0.019 |
| A015134_01 | At4g22710 | cytochrome p450 family; protein id: At4g22710.1           | -1.864 | -2.224 | -1.663 | -2.831 |
| A015141_01 | At4g28470 | putative protein; protein id: At4g28470.1                 | 0.571  | 0.448  | 0.331  | 0.821  |
| A015144_01 | At4g26780 | grpE like protein; protein id: At4g26780.1                | 0.776  | 1.193  | 1.014  | 1.511  |
| A015147_01 | At4g07410 | unknown protein; protein id: At4g07410.1                  | 0.324  | 0.458  | NA     | 1.079  |
| A015148_01 | At4g14190 | salt-inducible protein homolog; protein id: At4g1419      | -0.599 | -0.362 | -0.33  | -0.439 |
| A015149_01 | At4g38090 | putative protein; protein id: At4g38090.1                 | -0.133 | 0.09   | -0.226 | -0.788 |
| A015157_01 | At4g38020 | hypothetical protein; protein id: At4g38020.1             | 0.744  | 0.657  | -0.2   | 0.25   |
| A015160_01 | At4g38350 | putative protein; protein id: At4g38350.1                 | -0.082 | -0.163 | NA     | 0.233  |
| A015163_01 | At4g14450 | hypothetical protein; protein id: At4g14450.1             | 0.159  | NA     | -0.012 | 0.1    |
| A015165_01 | At4g05180 | oxygen-evolving complex protein 16, chloroplast pre       | -0.347 | -0.693 | -0.543 | -0.99  |
| A015167_01 | At4g31390 | similar to putative ABC transporter; protein id: At4g     | -1.071 | NA     | -1.616 | -2.283 |
| A015168_01 | At4g30200 | putative protein; protein id: At4g30200.1                 | 0.046  | -0.36  | -0.371 | -0.185 |
| A015171_01 | At4g36390 | putative protein; protein id: At4g36390.1                 | -0.111 | NA     | -0.438 | -0.101 |
| A015181_01 | At4g31460 | putative protein; protein id: At4g31460.1                 | 0.875  | 0.845  | 0.753  | 0.615  |
| A015182_01 | At4g13830 | DnaJ-like protein; protein id: At4g13830.1                | -2.53  | -2.38  | -1.134 | -2.373 |
| A015183_01 | At4g26500 | putative protein; protein id: At4g26500.1                 | 0.497  | 0.574  | -0.044 | -0.341 |
| A015185_01 | At4g08980 | F-box protein family, AtFBW2; protein id: At4g0898        | -0.374 | -0.324 | 0.197  | 0.394  |
| A015187_01 | At4g14870 | expressed protein; protein id: At4g14870.1                | 0.215  | NA     | 0.44   | -0.632 |
| A015190_01 | At4g14900 | hydroxyproline-rich glycoprotein homolog; protein id      | -0.404 | NA     | NA     | NA     |

|            |           |                                                         |           |           |        |        |
|------------|-----------|---------------------------------------------------------|-----------|-----------|--------|--------|
| A015196_01 | At4g29480 | putative protein; protein id: At4g29480.1               | 0.524     | 0.696     | 0.491  | 0.019  |
| A015197_01 | At4g25550 | putative protein; protein id: At4g25550.1               | -0.242    | -0.146 NA |        | -0.425 |
| A015199_01 | At4g18600 | gene 11-1 protein - like; protein id: At4g18600.1       | 0.156     | -0.191 NA | NA     |        |
| A015203_01 | At4g16500 | cysteine proteinase inhibitor like protein; protein id: | 0.293     | 0.385     | -0.069 | -0.503 |
| A015220_01 | At4g24060 | Dof zinc finger protein; protein id: At4g24060.1        | -0.048    | -0.088    | -0.005 | -0.062 |
| A015223_01 | At4g00660 | DEAD/DEAH box RNA helicase, putative; protein id        | -0.078    | -0.08     | -0.012 | 0.207  |
| A015232_01 | At4g38580 | putative farnesylated protein                           | 0.032     | 0.059     | 0.202  | -0.245 |
| A015235_01 | At4g25630 | fibrillarin 2 (AtFib2); protein id: At4g25630.1         | 1.285     | 1.129     | 1.221  | 1.974  |
| A015236_01 | At4g30720 | putative protein; protein id: At4g30720.1               | 0.141     | 0.062     | 0.052  | -0.046 |
| A015237_01 | At4g33250 | putative protein; protein id: At4g33250.1               | 0.304     | 0.395     | 0.386  | 0.48   |
| A015239_01 | At4g15880 | expressed protein; protein id: At4g15880.1              | -0.023    | 0.128     | 0.204  | 0.596  |
| A015240_01 | At4g30220 | snRNP Sm protein F - like; protein id: At4g30220.1      | 0.941     | 1.237     | 0.869  | 0.884  |
| A015243_01 | At4g27710 | cytochrome P450 - like protein; protein id: At4g2771    | -0.421    | -0.689    | -0.994 | -1.011 |
| A015246_01 | At4g34215 | expressed protein; protein id: At4g34215.1              | 0.164 NA  |           | 0.254  | -0.001 |
| A015249_01 | At4g35060 | copper chaperone (CCH)-related; protein id: At4g35      | -2.083    | -1.929    | -1.061 | -2.061 |
| A015251_01 | At4g16210 | enoyl-CoA hydratase like protein; protein id: At4g16    | -0.627    | -0.57     | -0.101 | -0.288 |
| A015257_01 | At4g34450 | nonclathrin coat protein gamma - like protein; protei   | 0.214     | 0.446     | -0.296 | -0.254 |
| A015260_01 | At4g16370 | isp4 like protein; protein id: At4g16370.1              | -0.671    | -0.749 NA |        | -1.474 |
| A015263_01 | At4g01870 | hypothetical protein; protein id: At4g01870.1           | NA        | NA        | -1.316 | -2.113 |
| A015264_01 | At4g39680 | hypothetical protein; protein id: At4g39680.1           | -0.005    | -0.102    | 0.105  | 0.144  |
| A015265_01 | At4g22190 | expressed protein; protein id: At4g22190.1              | 0.161     | 0.251     | 0.217  | 0.098  |
| A015266_01 | At4g22185 | similar to protein; protein id: At4g22185               | 0.136 NA  |           | 0.467  | -0.087 |
| A015267_01 | At4g16480 | membrane transporter like protein; protein id: At4g1    | -0.882 NA |           | -0.484 | -0.987 |
| A015269_01 | At4g24560 | ubiquitin-specific protease 16 (UBP16), putative; pr    | -0.237    | -0.005    | 0.059  | -0.462 |
| A015271_01 | At4g16530 | hypothetical protein; protein id: At4g16530.1           | -0.32     | -0.402    | 0.054  | -0.279 |
| A015272_01 | At4g09330 | putative protein; protein id: At4g09330.1               | -0.277    | -0.745    | -0.107 | -0.028 |
| A015279_01 | At4g16690 | cyanohydrin lyase like protein; protein id: At4g16690   | -1.375    | -1.372    | -0.502 | -0.839 |
| A015281_01 | At4g18830 | putative protein; protein id: At4g18830.1               | NA        | NA        | NA     | NA     |
| A015283_01 | At4g30950 | chloroplast omega-6 fatty acid desaturase (fad6); pr    | 0.22      | -0.01     | -0.57  | -0.359 |
| A015284_01 | At4g22750 | expressed protein; protein id: At4g22750.1              | -0.196    | -0.359    | -0.195 | -0.16  |
| A015285_01 | At4g23630 | putative protein; protein id: At4g23630.1               | 0.214     | -0.277    | 0.343  | 0.514  |
| A015286_01 | At4g31985 | expressed protein; protein id: At4g31985.1              | 0.624     | 0.807     | 0.688  | 0.683  |
| A015294_01 | At4g19985 | expressed protein; protein id: At4g19985.1              | 0.747     | 0.624     | 0.204  | 0.655  |
| A015296_01 | At4g00270 | contains similarity to S. cerevisiae ADR1 gene (PID     | -0.027    | -0.563    | 0.254  | 0.203  |
| A015301_01 | At4g25770 | putative protein; protein id: At4g25770.1               | -0.685 NA | NA        |        | -0.496 |
| A015302_01 | At4g18730 | ribosomal protein L11, cytosolic; protein id: At4g187   | 0.605     | 0.776     | 0.55   | 0.544  |
| A015313_01 | At4g31240 | similar to putative receptor kinase; protein id: At4g3  | -1.236 NA |           | -0.81  | -1.095 |
| A015314_01 | At4g31780 | monogalactosyldiacylglycerol synthase - like protei     | -0.009    | -0.148    | -0.448 | -0.595 |
| A015319_01 | At4g30390 | putative protein; protein id: At4g30390.1               | -0.936    | -0.536    | -0.143 | -0.77  |
| A015320_01 | At4g14145 | similar to kinesin like protein; protein id: At4g14145  | -0.13     | 0.054 NA  | NA     |        |
| A015321_01 | At4g17530 | ras-related small GTP-binding protein RAB1c; prote      | -0.358    | -0.997    | -0.178 | -0.534 |
| A015323_01 | At4g24520 | NADPH-ferrihemoprotein reductase ATR1; protein i        | -0.137    | -0.096    | -0.388 | -0.414 |
| A015331_01 | At4g24040 | glycosyl hydrolase family 37 (trehalase); protein id:   | -0.821    | -0.964    | -0.289 | 0.03   |
| A015336_01 | At4g32150 | synaptobrevin-like protein; protein id: At4g32150       | -1.313    | -1.181    | -0.525 | -0.658 |
| A015339_01 | At4g00780 | coded for by A. thaliana cDNA T20615; protein id: A     | -3.418    | -4.089    | -2.144 | -2.876 |
| A015345_01 | At4g00870 | bHLH protein; protein id: At4g00870.1                   | 0.528     | 0.502     | 1.101  | 1.28   |
| A015349_01 | At4g33460 | ABC transporter family protein; protein id: At4g3346    | -0.143    | -0.037    | -0.031 | -0.176 |
| A015351_01 | At4g28240 | putative wound induced protein; protein id: At4g282     | -2.012    | -2.018    | -0.43  | -1.234 |
| A015356_01 | At4g30810 | A.t. putative transcription factor (MYB98) mRNA, cc     | 0.82      | 0.772     | 0.258  | 0.51   |
| A015357_01 | At4g12680 | putative protein; protein id: At4g12680.1               | -0.132    | -0.222 NA |        | -0.09  |
| A015360_01 | At4g29190 | putative protein; protein id: At4g29190.1               | -0.436    | -0.52     | -0.12  | -0.124 |
| A015361_01 | At4g17790 | expressed protein; protein id: At4g17790.1              | -0.391 NA |           | -0.125 | -0.219 |
| A015368_01 | At4g12760 | hypothetical protein; protein id: At4g12760.1           | -0.474    | -0.468    | 0.132  | -0.346 |
| A015378_01 | At4g32190 | putative protein; protein id: At4g32190.1               | -0.73     | -0.805    | -0.785 | -0.394 |
| A015380_01 | At4g15160 | cell wall protein like; protein id: At4g15160.1         | -0.852    | -0.567    | -0.452 | -0.949 |
| A015388_01 | At4g32400 | mitochondrial carrier protein family; protein id: At4g  | 0.377     | 0.459     | 0.448  | 0.644  |
| A015394_01 | At4g30600 | signal recognition particle receptor-like protein; prot | -0.906    | -1.237    | -0.946 | -0.537 |
| A015397_01 | At4g22550 | putative protein; protein id: At4g22550.1               | 0.112     | 0.553     | 0.408  | 0.173  |
| A015404_01 | At4g27000 | RNA binding protein 45 (RBP45), putative; protein i     | 0.008     | -0.037    | 0.202  | 0.62   |
| A015414_01 | At4g15030 | putative protein; protein id: At4g15030.1               | -0.012 NA |           | -0.041 | -0.362 |
| A015422_01 | At4g36530 | putative protein; protein id: At4g36530.1               | -0.434    | -0.634    | -1.074 | -1.11  |
| A015423_01 | At4g35840 | putative protein; protein id: At4g35840.1               | -0.642    | -0.74     | 0.098  | -0.518 |
| A015431_01 | At4g28400 | protein phosphatase 2C (PP2C); protein id: At4g28       | -0.643    | -0.754    | -0.233 | -0.064 |
| A015432_01 | At4g19210 | RNase L inhibitor protein, putative; protein id: At4g1  | 0.444     | -0.054    | -0.064 | 0.444  |
| A015434_01 | At4g33945 | putative protein; protein id: At4g33945.1               | 0.516 NA  |           | 0.001  | 0.071  |
| A015435_01 | At4g32915 | expressed protein; protein id: At4g32915.1              | 0.635 NA  |           | 0.472  | -0.133 |
| A015439_01 | At4g36790 | putative protein; protein id: At4g36790.1               | -1.011    | -0.966    | -0.72  | -0.941 |
| A015442_01 | At4g36840 | putative protein; protein id: At4g36840.1               | -0.319    | -0.42 NA  |        | -0.612 |

|            |           |                                                                                |        |        |        |        |
|------------|-----------|--------------------------------------------------------------------------------|--------|--------|--------|--------|
| A015444_01 | At4g33680 | putative protein; protein id: At4g33680.1                                      | 0.958  | 0.598  | 0.457  | 0.895  |
| A015445_01 | At4g02260 | putative GTP pyrophosphokinase; protein id: At4g02260.1                        | -0.331 | -0.709 | -0.991 | -0.725 |
| A015446_01 | At4g02280 | sucrose synthase, putative; protein id: At4g02280.1                            | NA     | NA     | NA     | NA     |
| A015447_01 | At4g36930 | bHLH protein, SPATULA; protein id: At4g36930.1                                 | -1.264 | -1.313 | -1.125 | -1.313 |
| A015448_01 | At4g18740 | hypothetical protein; protein id: At4g18740.1                                  | -1.09  | NA     | -0.776 | -1.055 |
| A015450_01 | At4g02340 | coded for by A. thaliana cDNA T04215; protein id: A015450.1                    | -0.145 | -0.362 | 0.144  | -0.352 |
| A015453_01 | At4g13430 | putative protein; protein id: At4g13430.1                                      | -0.106 | -0.297 | 0.002  | 0.415  |
| A015454_01 | At4g37080 | putative protein; protein id: At4g37080.1                                      | 0.412  | 0.035  | NA     | -0.019 |
| A015455_01 | At4g02430 | arginine/serine-rich splicing factor (atSRp34), putative                       | -0.062 | -0.301 | -0.016 | -0.064 |
| A015457_01 | At4g33630 | expressed protein; protein id: At4g33630.1                                     | -0.059 | -0.686 | -0.148 | -0.399 |
| A015458_01 | At4g33580 | carbonate dehydratase - like protein; protein id: At4g33580.1                  | 0.588  | 0.401  | 0.464  | 0.473  |
| A015462_01 | At4g02680 | hypothetical protein; protein id: At4g02680.1                                  | -0.02  | -0.05  | 0.31   | 0.395  |
| A015463_01 | At4g37980 | cinnamyl-alcohol dehydrogenase ELI3-1; protein id: At4g37980.1                 | 0.259  | 0.069  | 0.728  | 1.044  |
| A015464_01 | At4g37240 | putative protein; protein id: At4g37240.1                                      | 0.987  | 1.115  | 0.907  | 0.559  |
| A015465_01 | At4g37260 | myb DNA-binding protein (AtMYB73); protein id: At4g37260.1                     | -0.501 | -0.506 | 0.012  | -0.074 |
| A015466_01 | At4g39240 | putative protein; protein id: At4g39240.1                                      | 0.22   | -0.03  | 0.082  | 0.428  |
| A015472_01 | At4g36680 | salt-inducible like protein; protein id: At4g36680.1                           | 1.164  | 1.122  | 1.188  | 1.502  |
| A015473_01 | At4g38490 | expressed protein; protein id: At4g38490.1                                     | -0.114 | 0.226  | 0.202  | -0.518 |
| A015474_01 | At4g26510 | putative uracil phosphoribosyl transferase; protein id: At4g26510.1            | 0.514  | 0.346  | NA     | -0.175 |
| A015475_01 | At4g16630 | DEAD/DEAH box RNA helicase, putative; protein id: At4g16630.1                  | 1.037  | 0.657  | NA     | 1.038  |
| A015477_01 | At4g33190 | A.t. DNA chromosome 5, BAC clone T22D6 (ESSA)                                  | 0.078  | -0.082 | 0.044  | -0.223 |
| A015481_01 | At4g03020 | putative WD-repeat protein; protein id: At4g03020.1                            | -0.308 | -0.51  | -0.365 | -0.097 |
| A015483_01 | At4g03050 | putative oxidoreductase; protein id: At4g03050.1                               | -1.667 | -2.663 | -1.12  | -1.571 |
| A015484_01 | At4g09320 | nucleoside-diphosphate kinase; protein id: At4g09320.1                         | 0.518  | 0.416  | 0.959  | 1.341  |
| A015487_01 | At4g29880 | putative protein; protein id: At4g29880.1                                      | -0.577 | -0.79  | NA     | NA     |
| A015490_01 | At4g21860 | expressed protein; protein id: At4g21860.1                                     | 0.326  | NA     | 0.172  | -0.836 |
| A015492_01 | At4g36360 | glycosyl hydrolase family 35 (beta-galactosidase); protein id: At4g36360.1     | 1.443  | 1.423  | 1.216  | 1.255  |
| A015493_01 | At4g18820 | putative protein; protein id: At4g18820.1                                      | 0.395  | NA     | NA     | 0.123  |
| A015498_01 | At5g10930 | serine/threonine protein kinase - like protein; protein id: At5g10930.1        | -2.777 | -2.908 | -1.227 | -1.758 |
| A015504_01 | At5g11090 | putative protein; protein id: At5g11090.1                                      | -1.872 | NA     | -0.686 | -1.653 |
| A015505_01 | At5g65640 | bHLH protein; protein id: At5g65640.1                                          | 0.99   | 0.315  | 0.504  | 0.447  |
| A015508_01 | At5g62770 | putative protein; protein id: At5g62770.1                                      | -1.149 | NA     | NA     | NA     |
| A015510_01 | At5g62750 | putative protein; protein id: At5g62750.1                                      | -0.605 | -0.819 | -1.255 | -2.551 |
| A015511_01 | At5g09260 | putative protein; protein id: At5g09260.1                                      | 0.222  | -0.022 | 0.518  | 0.205  |
| A015513_01 | At5g55210 | putative protein; protein id: At5g55210.1                                      | -0.044 | -0.014 | 0.046  | 0.047  |
| A015519_01 | At5g13010 | pre-mRNA splicing factor ATP-dependent RNA helicase; protein id: At5g13010.1   | -0.418 | -0.484 | NA     | -0.827 |
| A015522_01 | At5g09390 | putative protein; protein id: At5g09390.1                                      | 0.295  | 0.02   | 0.289  | 0.169  |
| A015523_01 | At5g13020 | putative protein; protein id: At5g13020.1                                      | -0.085 | -0.266 | -0.184 | 0.096  |
| A015524_01 | At5g08280 | hydroxymethylbilane synthase; protein id: At5g08280.1                          | 0.924  | 0.834  | 0.285  | 0.572  |
| A015530_01 | At5g13510 | ribosomal protein L10-like; protein id: At5g13510.1                            | 0.59   | 0.5    | 0.355  | -0.058 |
| A015534_01 | At5g45250 | disease resistance protein RPS4 (TIR-NBS-LRR class 4); protein id: At5g45250.1 | -1.238 | -1.061 | NA     | -0.912 |
| A015536_01 | At5g47320 | 40S ribosomal protein S19, mitochondrial precursor                             | 0.651  | 0.422  | 0.403  | 0.593  |
| A015539_01 | At5g64370 | beta-ureidopropionase; protein id: At5g64370.1                                 | -0.952 | -0.869 | 0.013  | 0.371  |
| A015540_01 | At5g53730 | hairpin-induced protein, putative (HIN1); protein id: At5g53730.1              | -3.516 | -3.273 | -1.968 | -2.921 |
| A015543_01 | At5g13180 | NAM-like protein; protein id: At5g13180.1                                      | -2.048 | -2.411 | -1.148 | -1.531 |
| A015548_01 | At5g04180 | carbonate dehydratase - like protein; protein id: At5g04180.1                  | -0.163 | -0.303 | -1.469 | -1.718 |
| A015550_01 | At5g62810 | putative protein; protein id: At5g62810.1                                      | -0.229 | -0.706 | -0.23  | -0.671 |
| A015558_01 | At5g10650 | Pspzf zinc finger protein - like; protein id: At5g10650.1                      | -2.609 | NA     | NA     | -2.559 |
| A015563_01 | At5g10710 | putative protein; protein id: At5g10710.1                                      | 0.062  | NA     | NA     | 0.009  |
| A015571_01 | At5g08320 | putative protein; protein id: At5g08320.1                                      | 0.239  | 0.365  | NA     | NA     |
| A015576_01 | At5g07960 | putative protein; protein id: At5g07960.1                                      | 0.323  | 0.336  | 0.615  | -0.519 |
| A015578_01 | At5g60750 | putative protein; protein id: At5g60750.1                                      | -0.405 | NA     | NA     | -0.251 |
| A015579_01 | At5g08420 | rev interacting protein mis3 - like; protein id: At5g08420.1                   | 0.458  | 0.091  | 0.18   | 0.349  |
| A015585_01 | At5g08040 | putative protein; protein id: At5g08040.1                                      | 0.879  | 0.849  | 0.942  | 0.432  |
| A015586_01 | At5g40350 | myb family transcription factor; protein id: At5g40350.1                       | 0.873  | 1.048  | 0.957  | 0.479  |
| A015587_01 | At5g40340 | PWWP domain protein; protein id: At5g40340.1                                   | -0.087 | -0.336 | -0.116 | -0.302 |
| A015591_01 | At5g15800 | MADS-box protein AGL2; protein id: At5g15800.1                                 | -1.188 | -1.11  | -0.216 | -0.181 |
| A015595_01 | At5g40670 | putative protein; protein id: At5g40670.1                                      | -1.099 | -1.564 | -0.824 | -1.173 |
| A015599_01 | At5g16290 | acetolactate synthase-like protein; protein id: At5g16290.1                    | 0.313  | 0.35   | 0.184  | 0.395  |
| A015600_01 | At5g22720 | F-box protein; protein id: At5g22720.1                                         | 0.283  | NA     | NA     | 0.348  |
| A015605_01 | At5g22010 | similar to replication factor C large subunit-like; protein id: At5g22010.1    | 0.567  | 0.303  | NA     | 0.279  |
| A015607_01 | At5g22050 | similar to putative protein kinase; protein id: At5g22050.1                    | 0.052  | -0.133 | -0.043 | 0.042  |
| A015608_01 | At5g53820 | ABA-inducible protein-like; protein id: At5g53820.1                            | -0.97  | NA     | -0.134 | -0.916 |
| A015613_01 | At5g22640 | unknown protein                                                                | 0.526  | 0.5    | 0.278  | 0.189  |
| A015616_01 | At5g40530 | putative protein; protein id: At5g40530.1                                      | 0.32   | NA     | NA     | 0.286  |
| A015617_01 | At5g40520 | putative protein; protein id: At5g40520.1                                      | -1.031 | -0.984 | NA     | -0.302 |
| A015619_01 | At5g37290 | putative protein; protein id: At5g37290.1                                      | -0.073 | -0.159 | NA     | 0.337  |
| A015625_01 | At5g11350 | putative protein; protein id: At5g11350.1                                      | 0.093  | NA     | NA     | -0.006 |

|            |           |                                                         |           |           |        |        |
|------------|-----------|---------------------------------------------------------|-----------|-----------|--------|--------|
| A015629_01 | At5g16370 | AMP-binding protein; protein id: At5g16370.1            | -1.953    | -1.809    | -1.324 | -0.534 |
| A015634_01 | At5g40780 | amino acid permease; protein id: At5g40780.1            | -1.734    | -2.13     | -0.928 | -1.553 |
| A015635_01 | At5g60730 | ATPase - like protein; protein id: At5g60730.1          | -0.49 NA  | NA        |        | -0.574 |
| A015637_01 | At5g61040 | putative protein; protein id: At5g61040.1               | -0.446 NA | NA        |        | -0.532 |
| A015638_01 | At5g40510 | sucrose cleavage protein; protein id: At5g40510         | -0.371 NA | NA        |        | -0.672 |
| A015639_01 | At5g25130 | cytochrome p450 family; protein id: At5g25130.1         | -1.451    | -2.295    | -1.69  | -1.714 |
| A015641_01 | At5g63030 | glutaredoxin-like protein; protein id: At5g63030.1      | -1.322    | -1.287    | -0.594 | -1.257 |
| A015643_01 | At5g24430 | calcium dependent protein kinase-like protein; prote    | -0.226 NA | NA        |        | -0.438 |
| A015645_01 | At5g43810 | PINHEAD (gb AAD40098.1); translation initiation fac     | 0.653     | 0.324     | 0.412  | 0.541  |
| A015646_01 | At5g55000 | FH protein interacting protein FIP2 (gb AAF14550.1      | -0.286    | -0.006    | -0.018 | 0.19   |
| A015647_01 | At5g10740 | protein phosphatase 2C -like protein; protein id: At5   | -0.814    | -0.939 NA |        | -0.82  |
| A015648_01 | At5g64220 | calmodulin-binding protein; protein id: At5g64220.1     | -0.469 NA | NA        |        | -0.325 |
| A015649_01 | At5g07360 | putative amidase; protein id: At5g07360.1               | -0.778    | -0.679 NA |        | -1.244 |
| A015650_01 | At5g55500 | expressed protein; protein id: At5g55500.1              | 0.109     | -0.151    | -0.035 | -0.203 |
| A015651_01 | At5g64180 | putative protein; protein id: At5g64180.1               | -0.522    | -0.421    | -0.278 | -0.476 |
| A015653_01 | At5g37360 | putative protein; protein id: At5g37360.1               | -0.77 NA  |           | -0.27  | -0.764 |
| A015654_01 | At5g10790 | ubiquitin-specific protease 22 (UBP22); protein id: A   | -0.014 NA | NA        |        | -0.43  |
| A015658_01 | At5g03190 | putative protein; protein id: At5g03190.1               | -1.504    | -1.759    | -0.695 | -0.974 |
| A015659_01 | At5g38150 | putative protein; protein id: At5g38150.1               | 0.33 NA   | NA        |        | -0.17  |
| A015660_01 | At5g04830 | expressed protein; protein id: At5g04830.1              | -0.88     | -0.942    | -0.13  | -0.58  |
| A015662_01 | At5g38140 | putative protein; protein id: At5g38140.1               | 0.524     | 0.026     | 0.361  | 0.071  |
| A015663_01 | At5g62930 | putative protein; protein id: At5g62930.1               | 0.615     | 0.59      | 0.434  | 0.362  |
| A015665_01 | At5g03320 | putative protein; protein id: At5g03320.1               | -0.9      | -0.808 NA |        | -0.599 |
| A015667_01 | At5g37680 | ADP-ribosylation factor - like protein; protein id: At5 | 0.124     | 0.097     | 0.349  | 0.149  |
| A015668_01 | At5g61720 | putative protein; protein id: At5g61720.1               | 0.423     | 0.014     | 0.085  | -0.183 |
| A015673_01 | At5g61760 | putative protein; protein id: At5g61760.1               | 0.216     | 0.16      | 0.525  | 0.472  |
| A015678_01 | At5g10070 | putative protein; protein id: At5g10070.1               | 0.158     | -0.139    | 0.313  | 0.174  |
| A015679_01 | At5g39880 | putative protein; protein id: At5g39880.1               | -0.634    | -0.952    | -1.196 | -1.183 |
| A015692_01 | At5g44300 | auxin-repressed protein-like; protein id: At5g44300.    | -0.495    | -0.587 NA | NA     |        |
| A015697_01 | At5g35080 | putative protein; protein id: At5g35080.1               | 0.168     | -0.035    | 0.142  | 0.418  |
| A015703_01 | At5g47010 | prematurely terminated mRNA decay factor-like pro       | 0.267     | -0.088 NA |        | 0.07   |
| A015705_01 | At5g62050 | OXA1 protein (OXA1p); protein id: At5g62050.1           | -0.303    | 0.189     | -0.115 | 0.501  |
| A015707_01 | At5g48590 | putative protein; protein id: At5g48590.1               | -0.685    | -0.881    | -0.716 | -0.891 |
| A015713_01 | At5g04910 | putative protein; protein id: At5g04910.1               | -0.315 NA |           | 0.129  | -0.298 |
| A015716_01 | At5g35200 | putative protein; protein id: At5g35200.1               | -0.069    | -0.976 NA |        | -0.633 |
| A015723_01 | At5g17290 | AtAPG5; protein id: At5g17290.1                         | -0.929    | -1.006    | -0.725 | -1.243 |
| A015724_01 | At5g42540 | 5-3 exoribonuclease 2; protein id: At5g42540.1          | 0.472     | 0.106     | 0.153  | 0.407  |
| A015725_01 | At5g62880 | GTP binding protein Arac10; protein id: At5g62880.      | 0.064     | -0.118    | 0.139  | 0.102  |
| A015733_01 | At5g15160 | bHLH protein; protein id: At5g15160.1                   | -0.672 NA | NA        | NA     |        |
| A015739_01 | At5g12200 | dihydropyrimidinase; protein id: At5g12200.1            | -0.638    | -0.615    | -0.516 | -0.193 |
| A015744_01 | At5g15330 | ids-4 protein - like; protein id: At5g15330.1           | NA        | NA        | -0.116 | -0.346 |
| A015747_01 | At5g12260 | unknown protein; protein id: At5g12260.1                | -0.073 NA | NA        |        | 0.14   |
| A015750_01 | At5g15390 | rRNA methylase - like protein; protein id: At5g15390    | 0.466     | 0.391     | 0.103  | 0.149  |
| A015753_01 | At5g63110 | histone deacetylase; protein id: At5g63110.1            | 0.269     | 0.025     | 0.267  | 0.078  |
| A015757_01 | At5g43070 | putative protein; protein id: At5g43070.1               | -0.255    | -0.025    | 0.091  | -0.013 |
| A015762_01 | At5g13690 | alpha-N-acetylglucosaminidase; protein id: At5g136      | 0.957     | 0.772     | 0.168  | 0.528  |
| A015763_01 | At5g63280 | expressed protein; protein id: At5g63280.1              | -0.06 NA  | NA        |        | -0.435 |
| A015772_01 | At5g10560 | glycosyl hydrolase family 3; protein id: At5g10560.1    | 1.141     | 0.889     | 0.759  | 1.003  |
| A015776_01 | At5g41350 | A.t. genomic DNA, chromosome 5, P1 clone:MNF1;          | -0.889 NA | NA        |        | -1.099 |
| A015777_01 | At5g56340 | putative protein; protein id: At5g56340.1               | 0.037     | -0.28     | -0.066 | -0.231 |
| A015778_01 | At5g10470 | kinesin-related protein; protein id: At5g10470.1        | -0.355    | -0.665 NA |        | -0.219 |
| A015779_01 | At5g41600 | unknown protein; protein id: At5g41600                  | 0.475     | 0.482     | 0.585  | 0.716  |
| A015780_01 | At5g56420 | F-box protein; protein id: At5g56420.1                  | 0.191     | -0.063    | -0.076 | 0.022  |
| A015790_01 | At5g13970 | putative protein; protein id: At5g13970.1               | -0.138    | -0.335    | 0.011  | -0.098 |
| A015793_01 | At5g23420 | expressed protein; protein id: At5g23420.1              | 1.586     | 1.304     | 1.462  | 1.698  |
| A015794_01 | At5g41685 | expressed protein; protein id: At5g41685.1              | 0.051     | -0.007    | 0.304  | -0.175 |
| A015797_01 | At5g39410 | expressed protein; protein id: At5g39410.1              | 0.734     | 0.58      | 0.575  | 0.525  |
| A015800_01 | At5g10730 | putative protein; protein id: At5g10730.1               | 0.482     | 0.278 NA  |        | 0.553  |
| A015805_01 | At5g52820 | Notchless protein homolog; protein id: At5g52820.1      | -0.058    | -0.084    | 0.175  | 0.425  |
| A015822_01 | At5g67320 | G-protein beta family; protein id: At5g67320.1          | 0.179     | 0.132     | -0.224 | 0.223  |
| A015825_01 | At5g52420 | expressed protein; protein id: At5g52420.1              | -0.082    | 0.024     | 0.297  | 0.012  |
| A015827_01 | At5g23890 | unknown protein; protein id: At5g23890.1                | 0.836     | 0.539 NA  |        | 0.336  |
| A015833_01 | At5g62200 | putative protein; protein id: At5g62200.1               | -0.313    | -0.19     | -0.207 | -0.723 |
| A015835_01 | At5g51190 | putative protein; protein id: At5g51190.1               | NA        | NA        | NA     | NA     |
| A015837_01 | At5g62230 | putative protein; protein id: At5g62230.1               | 1.121     | 0.999     | 0.971  | 1.3    |
| A015840_01 | At5g62290 | putative protein; protein id: At5g62290.1               | 0.66      | 0.653     | 0.72   | 0.846  |
| A015841_01 | At5g20070 | putative protein; protein id: At5g20070.1               | 0.477     | 0.477     | 0.687  | 0.761  |
| A015843_01 | At5g06220 | putative protein; protein id: At5g06220.1               | -0.117 NA |           | -0.794 | -0.685 |

|            |           |                                                                                |        |    |        |        |        |        |
|------------|-----------|--------------------------------------------------------------------------------|--------|----|--------|--------|--------|--------|
| A015844_01 | At5g53470 | putative protein; protein id: At5g53470.1                                      | 0.262  | NA |        | 0.31   |        | 0.229  |
| A015850_01 | At5g06190 | expressed protein; protein id: At5g06190.1                                     | 0.198  |    | 0.363  |        | 0.763  | 0.172  |
| A015856_01 | At5g62130 | putative protein; protein id: At5g62130.1                                      | -0.9   | NA |        | NA     |        | -0.105 |
| A015860_01 | At5g44630 | terpene synthase/cyclase family; protein id: At5g44630.1                       | 1.961  |    | 1.652  |        | 1.761  | 2.626  |
| A015861_01 | At5g44660 | putative protein; protein id: At5g44660.1                                      | 0.044  |    | 0.417  | NA     |        | 0.537  |
| A015862_01 | At5g06830 | CDK5 activator-binding protein-like; protein id: At5g06830.1                   | 0.306  | NA |        | NA     |        | -0.097 |
| A015864_01 | At5g66590 | unknown protein; protein id: At5g66590                                         | 1.267  |    | 1.28   |        | 0.865  | 0.993  |
| A015866_01 | At5g22920 | PGPD14 protein; protein id: At5g22920.1                                        | -1.455 |    | -1.506 |        | -0.674 | -0.648 |
| A015870_01 | At5g03470 | putative protein; protein id: At5g03470.1                                      | -0.424 |    |        | -0.5   | NA     | -0.731 |
| A015874_01 | At5g03380 | expressed protein; protein id: At5g03380.1                                     |        | NA | NA     |        |        | -0.583 |
| A015876_01 | At5g10270 | cyclin-dependent kinase C;1; protein id: At5g10270.1                           | -0.349 |    |        | -0.051 |        | 0.145  |
| A015877_01 | At5g55120 | putative protein; protein id: At5g55120.1                                      | 0.569  |    |        | 0.531  |        | 0.548  |
| A015878_01 | At5g54390 | putative protein; protein id: At5g54390.1                                      | -0.452 |    |        | -0.755 |        | -0.57  |
| A015879_01 | At5g57340 | expressed protein; protein id: At5g57340.1                                     | -1.137 | NA |        |        |        | -1.079 |
| A015881_01 | At5g36880 | acetyl-CoA synthetase; protein id: At5g36880.1                                 | 0.432  |    |        | 0.159  |        | 0.101  |
| A015882_01 | At5g54440 | unknown protein; protein id: At5g54440.1                                       | 0.459  |    |        | 0.43   |        | 0.458  |
| A015883_01 | At5g14120 | nodulin-like protein; protein id: At5g14120.1                                  | -1.222 |    |        | -1.771 |        | -1.319 |
| A015892_01 | At5g58070 | outer membrane lipoprotein - like; protein id: At5g58070.1                     | -1.147 |    |        | -1.031 |        | -0.36  |
| A015893_01 | At5g14170 | putative protein; protein id: At5g14170.1                                      | 0.188  |    |        | 0.161  |        | 0.023  |
| A015895_01 | At5g48580 | FKBP-type peptidyl-prolyl cis-trans isomerase, putative                        | 1.077  |    |        | 1.03   |        | 0.8    |
| A015896_01 | At5g35180 | putative protein; protein id: At5g35180.1                                      | 0.359  |    |        | 0.242  |        | 0.31   |
| A015900_01 | At5g42090 | putative protein; protein id: At5g42090.1                                      | -0.704 |    |        | -0.618 |        | -0.174 |
| A015904_01 | At5g43750 | expressed protein; protein id: At5g43750.1                                     | 0.122  |    |        | 0.366  |        | 0.037  |
| A015905_01 | At5g41750 | disease resistance protein (TIR-NBS-LRR class), putative                       | -1.129 | NA |        |        |        | -1.087 |
| A015906_01 | At5g08450 | putative protein; protein id: At5g08450.1                                      | 0.001  |    |        | -0.35  | NA     |        |
| A015910_01 | At5g62460 | expressed protein; protein id: At5g62460.1                                     | -0.824 |    |        | -0.819 |        | -0.101 |
| A015913_01 | At5g43900 | myosin heavy chain MYA2 (pir S51824); protein id: At5g43900.1                  | -0.332 |    |        | -0.473 |        | -0.126 |
| A015916_01 | At5g24500 | unknown protein; protein id: At5g24500.1                                       | 0.099  |    |        | 0.039  |        | 0.354  |
| A015922_01 | At5g24570 | expressed protein; protein id: At5g24570.1                                     | -0.306 |    |        | 0.033  |        | 0.654  |
| A015923_01 | At5g24590 | NAC2-like protein; protein id: At5g24590.2                                     | -0.288 |    |        | -0.309 |        | -0.038 |
| A015929_01 | At5g26360 | chaperonin gamma chain - like protein; protein id: At5g26360.1                 | 0.261  | NA |        |        |        | -0.408 |
| A015930_01 | At5g42320 | unknown protein; protein id: At5g42320.1                                       | 0.418  | NA |        | NA     |        | 0.409  |
| A015936_01 | At5g64190 | putative protein; protein id: At5g64190.1                                      |        | NA | NA     | NA     | NA     |        |
| A015938_01 | At5g22500 | male sterility 2-like protein (emb CAA68191.1); protein id: At5g22500.1        | 0.093  |    |        | -0.26  | NA     |        |
| A015940_01 | At5g60200 | Dof zinc finger protein; protein id: At5g60200.1                               | 0.864  |    |        | 0.852  |        | 1.309  |
| A015941_01 | At5g65280 | G protein-coupled receptor-like protein; protein id: At5g65280.1               | 0.462  |    |        | 0.669  |        | 0.986  |
| A015946_01 | At5g01470 | putative protein; protein id: At5g01470.1                                      | 0.135  |    |        | 0.29   |        | 0.61   |
| A015948_01 | At5g51750 | subtilisin-like serine protease; protein id: At5g51750.1                       | 1.72   |    |        | 1.21   |        | 1.486  |
| A015954_01 | At5g51770 | putative protein; protein id: At5g51770.1                                      | 0.171  |    |        | 0.001  |        | 0.668  |
| A015955_01 | At5g16730 | putative protein; protein id: At5g16730.1                                      | -0.157 |    |        | -0.24  | NA     |        |
| A015956_01 | At5g53850 | putative protein; protein id: At5g53850.1                                      | -0.262 |    |        | -0.162 |        | -0.182 |
| A015958_01 | At5g64510 | putative protein; protein id: At5g64510.1                                      | -0.626 |    |        | -0.512 |        | -0.05  |
| A015959_01 | At5g45170 | putative protein; protein id: At5g45170.1                                      | -0.161 |    |        | -0.185 |        | -0.201 |
| A015962_01 | At5g13650 | GTP-binding protein tyxA (tyrosine phosphorylated); protein id: At5g13650.1    | -0.574 |    |        | -1.083 |        | -1.35  |
| A015963_01 | At5g64530 | putative protein; protein id: At5g64530.1                                      | -0.967 |    |        | -1.632 |        | -1.053 |
| A015967_01 | At5g47530 | putative protein; protein id: At5g47530.1                                      | -3.615 | NA |        | NA     | NA     |        |
| A015968_01 | At5g64610 | histone acetyltransferase                                                      | 0.13   |    |        | -0.191 |        | 0.24   |
| A015972_01 | At5g05230 | unknown protein; protein id: At5g05230.1                                       | -0.955 | NA |        |        |        | -0.262 |
| A015973_01 | At5g58430 | leucine zipper-containing protein; protein id: At5g58430.1                     | -0.68  |    |        | -1.011 |        | -0.659 |
| A015977_01 | At5g62010 | auxin response transcription factor; protein id: At5g62010.1                   | -0.148 |    |        | -0.738 |        | -0.666 |
| A015979_01 | At5g16540 | zinc finger protein 3 (gb AAD27875.1); protein id: At5g16540.1                 | -0.455 |    |        | -0.276 |        | -0.261 |
| A015980_01 | At5g05340 | peroxidase, putative; protein id: At5g05340.1                                  | -0.506 |    |        | -0.33  |        | -0.364 |
| A015982_01 | At5g10360 | 40S ribosomal protein S6; protein id: At5g10360.1                              | 0.931  |    |        | 0.834  |        | 0.777  |
| A015984_01 | At5g40450 | putative protein; protein id: At5g40450.1                                      | -2.868 |    |        | -3.322 |        | -1.731 |
| A015986_01 | At5g51430 | putative protein; protein id: At5g51430.1                                      | 0.151  | NA |        | NA     |        | -0.079 |
| A015987_01 | At5g44320 | eukaryotic translation initiation factor 3 subunit 7; protein id: At5g44320.1  | 0.209  |    |        | 0.154  |        | 0.145  |
| A015988_01 | At5g12410 | putative protein; protein id: At5g12410.1                                      | 0.533  |    |        | 0.327  |        | 0.43   |
| A015990_01 | xxxx      | b/t DEAD-box protein abstract, putative; protein id: At5g12410.1               | -0.628 |    |        | -0.606 | NA     |        |
| A015995_01 | At5g61020 | putative protein; protein id: At5g61020.1                                      | 0.152  |    |        | 0.651  |        | 0.708  |
| A015996_01 | At5g11700 | putative protein; protein id: At5g11700.1                                      | -0.812 | NA |        |        |        | -0.54  |
| A015997_01 | At5g67260 | cyclin D3;2; protein id: At5g67260.1                                           | 0.974  |    |        | 0.606  |        | 0.795  |
| A015998_01 | At5g35910 | nucleolar protein-like; protein id: At5g35910.1                                | 0.53   |    |        | 0.591  |        | 0.466  |
| A016000_01 | At5g45060 | disease resistance protein (TIR-NBS-LRR class), putative                       | -0.483 |    |        | -0.968 |        | -0.702 |
| A016011_01 | At5g49840 | ATP-dependent Clp protease ATP-binding subunit C; protein id: At5g49840.1      | -0.271 |    |        | -0.525 |        | -0.551 |
| A016012_01 | At5g46290 | 3-oxoacyl-(acyl-carrier-protein) synthase I precursor; protein id: At5g46290.1 | 0.949  |    |        | 1.018  |        | 0.551  |
| A016019_01 | xxxx      | A.t. genomic DNA, chromosome 5, P1 clone:MTG1; protein id: At5g46290.1         | 0.504  |    |        | 0.426  |        | 0.319  |
| A016020_01 | At5g58100 | putative protein; protein id: At5g58100.1                                      | 0.013  | NA |        | NA     |        | -0.042 |
| A016021_01 | At5g49950 | putative protein; protein id: At5g49950.1                                      | -0.63  |    |        | -0.597 |        | -0.249 |

|            |           |                                                            |           |           |        |        |
|------------|-----------|------------------------------------------------------------|-----------|-----------|--------|--------|
| A016022_01 | At5g40250 | RING finger -like protein; protein id: At5g40250.1         | -0.285    | -0.311    | -0.051 | 0.133  |
| A016023_01 | At5g64460 | ZW10-like protein; protein id: At5g64460.1                 | 0.335     | 0.141     | 0.167  | 0.108  |
| A016028_01 | At5g22290 | (no apical meristem)-like protein; protein id: At5g22290.1 | -1.215    | -1.056 NA |        | 0.419  |
| A016029_01 | At5g39830 | DegP protease; protein id: At5g39830.1                     | 0.478     | 0.395     | -0.054 | -0.134 |
| A016033_01 | At5g66240 | WD repeat protein-like; protein id: At5g66240.1            | -0.269 NA |           | -0.021 | 0.072  |
| A016034_01 | At5g50260 | AtCEP1; cysteine proteinase; protein id: At5g50260 NA      | NA        |           | -2.009 | -2.799 |
| A016035_01 | At5g48630 | cyclin C-like protein; protein id: At5g48630.1             | 0.308     | 0.354     | 0.43   | 0.575  |
| A016041_01 | At5g55600 | unknown protein; protein id: At5g55600.1                   | -0.215 NA | NA        |        | -0.617 |
| A016044_01 | At5g22700 | F-box protein; protein id: At5g22700.1                     | 0.08 NA   |           | 0.146  | 0.993  |
| A016046_01 | At5g45680 | FKBP-type peptidyl-prolyl cis-trans isomerase; prote       | 0.38      | 0.57      | -0.092 | 0.004  |
| A016047_01 | At5g58250 | similar to unknown protein (sp P72777); protein id: /      | 0.991     | 0.96      | 0.475  | 0.258  |
| A016048_01 | At5g63490 | putative protein; protein id: At5g63490.1                  | -1.154    | -1.672    | -1.252 | -1.656 |
| A016051_01 | At5g55620 | putative protein; protein id: At5g55620.1                  | -1.881 NA | NA        | NA     |        |
| A016052_01 | At5g25040 | arginine/serine-rich splicing factor RSp41; protein id     | -0.01     | -0.041    | 0.212  | 0.097  |
| A016055_01 | At5g07430 | pectinesterase family; protein id: At5g07430.1             | -0.829    | -0.417    | -1.24  | -1.541 |
| A016059_01 | At5g13640 | putative protein; protein id: At5g13640.1                  | -0.213    | -0.282    | -0.42  | -0.261 |
| A016062_01 | At5g16390 | biotin carboxyl carrier protein 1 (BCCP1); protein id:     | 0.928     | 0.779     | 0.541  | 0.596  |
| A016066_01 | At5g37720 | RNA and export factor binding protein, putative; pro       | -0.048    | 0.304     | 0.397  | 0.601  |
| A016068_01 | At5g63460 | unknown protein; protein id: At5g63460.1                   | 0.14 NA   |           | 0.481  | -0.372 |
| A016069_01 | At5g13780 | putative protein; protein id: At5g13780.1                  | 0.319     | 0.33      | 0.363  | 0.121  |
| A016070_01 | At5g45190 | putative protein; protein id: At5g45190.1                  | 0.049     | -0.176    | -0.456 | -0.46  |
| A016072_01 | At5g05100 | putative protein; protein id: At5g05100.1                  | -0.659 NA |           | -0.513 | -0.772 |
| A016073_01 | At5g23290 | c-myc binding protein MM-1-like protein; protein id: .     | 0.533     | 0.54      | 0.478  | 0.165  |
| A016075_01 | At5g60640 | protein disulfide isomerase precursor - like; protein i    | 0.59      | 0.251     | 0.054  | 0.749  |
| A016083_01 | At5g22880 | histone H2B like protein (emb CAA69025.1); protein         | 1.283     | 1.31      | 1.352  | 2.034  |
| A016095_01 | At5g62190 | DEAD/DEAH box RNA helicase PRH75; protein id:              | 0.199     | 0.239     | 0.179  | 0.767  |
| A016099_01 | At5g52440 | HCF106 (gb AAD32652.1); protein id: At5g52440.1            | 0.141     | 0.085     | 0.071  | -0.062 |
| A016101_01 | At5g45410 | putative protein; protein id: At5g45410.2                  | -0.556    | -0.444    | -0.359 | -0.444 |
| A016103_01 | At5g62530 | dehydrogenase; protein id: At5g62530.1                     | -0.519    | -0.632    | -1.032 | -0.913 |
| A016104_01 | At5g23140 | ATP-dependent Clp protease proteolytic subunit (Cl         | 0.386     | 0.387     | 0.1    | -0.02  |
| A016105_01 | At5g01020 | protein kinase -like protein; protein id: At5g01020.1      | 0.227     | 0.44      | 0.348  | 0.476  |
| A016108_01 | At5g66760 | succinate dehydrogenase flavoprotein alpha subuni          | 0.431     | 0.076     | -0.002 | 0.277  |
| A016113_01 | At5g60340 | putative protein; protein id: At5g60340.1                  | -0.408    | -0.087    | 0.294  | 0.911  |
| A016117_01 | At5g17170 | expressed protein; protein id: At5g17170.1                 | 0.111     | -0.088    | -0.368 | -0.05  |
| A016119_01 | At5g60790 | ABC transporter family protein; protein id: At5g6079       | -0.338    | -0.108    | -0.385 | -0.002 |
| A016120_01 | At5g10480 | putative protein phosphatase; protein id: At5g10480        | 0.593 NA  |           | 0.802  | 1.172  |
| A016123_01 | At5g60840 | putative protein; protein id: At5g60840.1                  | -0.168    | 0.097     | -0.061 | -0.169 |
| A016125_01 | At5g60860 | GTP-binding protein, putative; protein id: At5g60860       | -0.346    | 0.456     | 0.383  | 0.149  |
| A016126_01 | At5g49550 | expressed protein; protein id: At5g49550.1                 | 0.146     | 0.411     | 0.505  | 0.542  |
| A016127_01 | At5g23750 | putative protein; protein id: At5g23750.1                  | -1.542 NA | NA        | NA     |        |
| A016130_01 | At5g14610 | DRH1 DEAD box protein - like; protein id: At5g1461         | 0.718     | 0.454     | 0.539  | 0.205  |
| A016131_01 | At5g51940 | putative DNA-directed RNA polymerase II subunit            | 0.19      | 0.214     | 0.522  | 0.07   |
| A016134_01 | At5g51960 | unknown protein; protein id: At5g51960.1                   | 0.519     | 0.512     | 0.385  | 0.421  |
| A016139_01 | At5g58720 | putative PRL1 associated protein; protein id: At5g58       | -0.304    | -0.459    | -0.44  | -0.288 |
| A016141_01 | At5g41790 | myosin heavy chain-like protein; protein id: At5g417       | -0.96     | -1.782    | -1.128 | -1.747 |
| A016147_01 | At5g37770 | calmodulin-related protein 2, touch-induced (TCH2)         | -0.093    | -0.197    | 0.156  | -0.27  |
| A016148_01 | At5g49360 | xylosidase glycosyl hydrolase family 3; protein id: A      | -3.518    | -3.317    | -2.147 | -2.465 |
| A016157_01 | At5g58950 | protein kinase 6 - like; protein id: At5g58950.1           | -0.834    | -0.78     | -0.608 | -0.585 |
| A016163_01 | At5g41010 | putative protein; protein id: At5g41010.1                  | 0.494     | 0.685     | 0.851  | 0.277  |
| A016169_01 | At5g12040 | putative protein; protein id: At5g12040.1                  | 0.135     | 0.084     | 0.018  | 0.039  |
| A016172_01 | At5g62165 | MADS-box protein; protein id: At5g62165.1                  | -0.78     | -0.879    | -0.53  | -0.687 |
| A016173_01 | At5g65040 | putative protein; protein id: At5g65040.1                  | -0.82     | -0.956 NA | NA     |        |
| A016174_01 | At5g51140 | putative protein; protein id: At5g51140.1                  | -0.264    | -0.247    | -0.14  | 0.008  |
| A016175_01 | At5g65010 | asparagine synthetase (gb AAC72837.1); protein id          | 1.687     | 1.336     | 0.993  | 1.781  |
| A016177_01 | At5g41070 | putative protein; protein id: At5g41070.1                  | 0.416     | 0.41      | 0.531  | 0.441  |
| A016183_01 | At5g47830 | A.t. genomic DNA, chromosome 5, P1 clone:MQN2              | 0.333     | 0.393     | -0.293 | -0.437 |
| A016186_01 | At5g22090 | unknown protein; protein id: At5g22090.1                   | -1.26     | -1.461    | -0.608 | -1.106 |
| A016187_01 | At5g62300 | ribosomal protein S20 - like; protein id: At5g62300.1      | 0.928     | 0.899     | 0.774  | 0.962  |
| A016191_01 | At5g23380 | putative protein; protein id: At5g23380.1                  | -0.356    | 0.108     | -0.121 | -0.311 |
| A016192_01 | At5g13160 | protein kinase-like; protein id: At5g13160.1               | -0.519 NA | NA        |        | -0.775 |
| A016193_01 | At5g01600 | ferritin 1 precursor; protein id: At5g01600.1              | -0.688    | -0.697    | 0.298  | 0.506  |
| A016195_01 | At5g08190 | DR1-like protein                                           | -0.373    | -0.522 NA |        | 0.013  |
| A016197_01 | At5g44200 | nuclear cap binding protein CBP20; protein id: At5g        | 0.447     | 0.41      | 0.516  | 0.574  |
| A016198_01 | At5g19780 | tubulin alpha-5 chain; protein id: At5g19780.1             | 0.778     | 0.687     | 0.367  | 0.794  |
| A016199_01 | At5g64940 | ABC transporter-like; protein id: At5g64940.1              | 0.198     | -0.375    | -0.636 | -0.683 |
| A016201_01 | At5g42480 | putative protein; protein id: At5g42480.1                  | 0.852     | 0.688     | 0.325  | 0.927  |
| A016202_01 | At5g42520 | putative protein; protein id: At5g42520.1                  | -0.023    | -0.406    | -0.111 | -0.591 |
| A016207_01 | At5g13630 | cobalamin biosynthesis protein; protein id: At5g1363       | -0.057    | -0.269    | -0.377 | 0.447  |



|            |           |                                                          |           |           |        |        |
|------------|-----------|----------------------------------------------------------|-----------|-----------|--------|--------|
| A016209_01 | At5g64260 | phi-1-like protein; protein id: At5g64260.1              | -0.807    | -0.809    | -0.416 | -0.909 |
| A016210_01 | At5g14780 | formate dehydrogenase; protein id:At5g14780.1            | -1.227    | -1.469    | -0.572 | -0.848 |
| A016211_01 | At5g05980 | tetrahydrofolylpolyglutamate synthase-like protein; p    | -0.581    | -0.615    | -0.283 | 0.125  |
| A016215_01 | At5g15320 | putative protein; protein id: At5g15320.1                | 0.593     | 0.596     | 0.485  | 0.138  |
| A016216_01 | At5g39220 | putative protein; protein id: At5g39220.1                | -0.123 NA |           | -0.272 | -0.692 |
| A016221_01 | At5g08590 | serine/threonine-protein kinase; protein id: At5g0859    | -0.416    | -0.271    | -0.238 | 0.423  |
| A016222_01 | At5g64850 | A.t. genomic DNA, chromosome 5, P1 clone:MVA3            | 0.259     | 0.159     | 0.486  | 0.288  |
| A016226_01 | At5g01820 | putative protein; protein id: At5g01820.1                | -1.324    | -1.346    | -0.333 | -0.555 |
| A016227_01 | At5g48540 | 33 kDa secretory protein-like; protein id: At5g48540     | -0.887    | -0.757    | -0.441 | -0.721 |
| A016229_01 | At5g67030 | zeaxanthin epoxidase precursor (LOS6/ABA1)(ZEP           | -1.468    | -1.759    | -1.521 | -1.479 |
| A016232_01 | At5g42570 | expressed protein; protein id: At5g42570.1               | 0.318     | 0.443     | 0.333  | 0.035  |
| A016233_01 | At5g37130 | putative protein; protein id: At5g37130.1                | -0.015    | -0.562    | -0.242 | 0.548  |
| A016234_01 | At5g08770 | unknown protein; protein id: At5g08770.1                 | -0.872    | -0.428 NA |        | -0.295 |
| A016238_01 | At5g54160 | O-methyltransferase 1; protein id: At5g54160.1           | -2.125    | -1.987    | -0.628 | -0.445 |
| A016240_01 | At5g38850 | disease resistance protein (TIR-NBS-LRR class), pi NA    |           | NA        | NA     | NA     |
| A016244_01 | At5g16120 | lipase-like protein; protein id: At5g16120.1             | -1.289    | -1.167    | -0.856 | -0.996 |
| A016247_01 | At5g54110 | membrane associated protein; protein id: At5g54110       | -0.744    | -0.868    | -0.598 | -0.817 |
| A016250_01 | At5g47080 | casein kinase II beta chain; protein id: At5g47080.1     | -0.582    | -0.256 NA |        | 0.276  |
| A016255_01 | At5g54130 | putative protein; protein id: At5g54130.1                | -0.948    | -1.275    | -0.733 | -0.914 |
| A016260_01 | At5g37370 | putative protein; protein id: At5g37370.1                | -0.36     | -0.375    | 0.101  | -0.081 |
| A016266_01 | At5g47050 | putative protein; protein id: At5g47050.1                | -1.807 NA |           | -0.681 | -1.101 |
| A016267_01 | At5g63990 | 3(2),5-bisphosphate nucleotidase; protein id: At5g63     | -0.159    | 0.058     | -0.01  | -0.105 |
| A016269_01 | At5g64020 | putative protein; protein id: At5g64020.1                | -0.301    | -0.08 NA  |        | NA     |
| A016271_01 | At5g58200 | putative phosphoesterase                                 | -0.832    | -1.022    | -0.232 | -0.471 |
| A016272_01 | At5g54090 | DNA mismatch repair protein MutS2-like; protein id:      | -0.543 NA |           | NA     | -0.436 |
| A016274_01 | At5g58220 | similar to unknown protein (pir T34863); protein id:     | 0.039 NA  |           | -0.092 | -0.082 |
| A016275_01 | At5g22000 | expressed protein; protein id: At5g22000.1               | -0.909    | -0.848    | -0.719 | -0.417 |
| A016278_01 | At5g61590 | ethylene responsive element binding factor - like; pr    | -1.134    | -1.288    | -1.635 | -1.936 |
| A016281_01 | At5g58260 | similar to unknown protein (pir S75584); protein id:     | -0.831    | -0.422    | -0.506 | -0.911 |
| A016282_01 | At5g58320 | putative protein; protein id: At5g47050.1                | -0.85     | -1.23 NA  |        | NA     |
| A016283_01 | At5g58370 | contains similarity to GTP-binding protein CGPA; pr      | 0.602     | 0.654     | 0.357  | 0.673  |
| A016285_01 | At5g48230 | acetyl-CoA C-acetyltransferase; protein id: At5g482      | 0.481     | 0.373     | 0.621  | 0.78   |
| A016286_01 | At5g58380 | serine/threonine protein kinase; protein id: At5g5838    | 0.028     | -0.433 NA |        | -0.123 |
| A016291_01 | At5g57270 | putative protein; protein id: At5g57270.1                | 0.306     | 0.265     | 0.179  | 0.452  |
| A016297_01 | xxxx      | b/t unknown protein; protein id: At5g56520.1 and put     | -0.166    | 0.006     | -0.203 | 0.038  |
| A016301_01 | At5g27470 | seryl-tRNA synthetase; protein id: At5g27470.1           | 0.301     | 0.297     | 0.18   | 0.639  |
| A016303_01 | At5g29771 | ribosomal protein S1; protein id: At5g29771.1            | 0.951     | 0.6       | 0.245  | 0.74   |
| A016306_01 | At5g38290 | CRS2 -like protein; protein id: At5g38290.1              | 0.245     | 0.204     | 0.033  | 0.127  |
| A016309_01 | At5g67130 | putative protein; protein id: At5g67130.1                | 0.503     | 0.477     | 0.423  | 0.484  |
| A016312_01 | At5g43100 | putative protein; protein id: At5g43100.1                | -0.193    | -0.336    | -0.362 | -0.479 |
| A016314_01 | At5g42070 | putative protein; protein id: At5g42070.1                | 0.048     | 0.126     | 0.113  | -0.762 |
| A016316_01 | At5g67240 | exonuclease, putative; protein id: At5g67240.1           | 0.473     | 0.453     | 0.333  | 0.526  |
| A016317_01 | At5g41970 | GAMM1 protein-like; protein id: At5g41970.1              | 0.426     | 0.524     | 0.331  | 0.18   |
| A016319_01 | At5g44610 | expressed protein                                        | -1.75     | -1.863    | -0.566 | -1.852 |
| A016320_01 | At5g41960 | unknown protein; protein id: At5g41960.1                 | -0.046    | -0.101    | -0.077 | 0.182  |
| A016321_01 | At5g44790 | ATP dependent copper transporter; protein id: At5g       | -0.831    | -1.007    | -0.947 | -1.678 |
| A016322_01 | At5g41910 | putative protein; protein id: At5g41910.1                | -0.22     | -0.069    | 0.223  | 0.253  |
| A016323_01 | At5g15850 | zinc finger protein CONSTANS-LIKE 1 (COL1); prot         | -1.839    | -1.915    | -0.699 | -1.349 |
| A016324_01 | At5g39610 | NAM / CUC2 - like protein; protein id: At5g39610.1       | -2.702    | -2.462    | -0.538 | -1.06  |
| A016325_01 | At5g58110 | putative protein; protein id: At5g58110.1                | -0.054    | -0.216    | -0.007 | -0.454 |
| A016327_01 | At5g42000 | putative protein; protein id: At5g42000.1                | -0.007    | 0.033     | 0.291  | -0.413 |
| A016330_01 | At5g44240 | ATPase, calcium-transporting; protein id: At5g44240      | -0.276    | -0.259    | 0.102  | -0.531 |
| A016331_01 | At5g62610 | putative protein; protein id: At5g62610.1                | -0.004    | 0.059     | 0.336  | 0.451  |
| A016332_01 | At5g62640 | putative protein; protein id: At5g62640.1                | -0.177    | 0.313 NA  |        | 0.44   |
| A016333_01 | At5g44550 | putative protein; protein id: At5g44550.1                | -0.433    | -0.366 NA |        | NA     |
| A016335_01 | At5g62670 | plasma membrane proton ATPase-like; protein id: A        | 0.442     | 0.488     | 0.76   | 0.883  |
| A016337_01 | At5g59320 | nonspecific lipid-transfer protein precursor - like; prc | -0.215    | -0.33     | 0.282  | 0.719  |
| A016340_01 | At5g06910 | DnaJ homologue (gb AAB91418.1 ); protein id: At5g        | 0.194     | 0.203 NA  |        | 0.222  |
| A016344_01 | At5g11200 | DEAD BOX RNA helicase RH15                               | 0.437     | 0.41      | 0.639  | 1.064  |
| A016347_01 | At5g17710 | chloroplast GrpE protein; protein id: At5g17710.1        | 0.462 NA  |           | -0.29  | -0.288 |
| A016351_01 | At5g47180 | VAMP (vesicle-associated membrane protein)-asso          | -0.624    | -0.704    | -0.036 | -0.612 |
| A016354_01 | At5g49610 | putative protein; protein id: At5g49610.1                | 0.06      | -0.057 NA |        | 0.015  |
| A016359_01 | At5g09440 | putative protein; protein id: At5g09440.1                | -2.076    | -2.182    | -0.597 | -1.015 |
| A016360_01 | At5g51510 | expressed protein; protein id: At5g51510.1               | 0.186     | 0.35      | 0.3    | 0.113  |
| A016362_01 | At5g01720 | F-box protein family, AtFBL3; protein id: At5g01720      | -0.189    | 0.148     | 0.083  | -0.264 |
| A016363_01 | At5g43960 | NTF2-containing RNA-binding protein, putative; prot      | 0.548     | 0.351     | 0.281  | 0.643  |
| A016364_01 | At5g48180 | unknown protein                                          | -2.309    | -2.799    | -0.886 | -1.657 |
| A016367_01 | At5g54770 | thiazole biosynthetic enzyme precursor (ARA6) (sp        | 0.165     | -0.067    | -0.164 | 0.019  |

|            |           |                                                                                        |        |    |        |        |
|------------|-----------|----------------------------------------------------------------------------------------|--------|----|--------|--------|
| A016368_01 | At5g54960 | putative pyruvate decarboxylase                                                        | -0.993 | NA | -1.58  | -2.191 |
| A016369_01 | At5g49450 | bZIP family transcription factor; protein id: At5g49450.1                              | -1.884 |    | -2.007 | -1.898 |
| A016370_01 | At5g22800 | similar to alanine--tRNA ligase; putative; protein id: At5g22800.1                     | -0.296 |    | -0.505 | -0.215 |
| A016372_01 | At5g57110 | calcium-transporting ATPase; protein id: At5g57110.1                                   | 0.438  |    | 0.668  | 0.784  |
| A016373_01 | At5g60540 | imidazoleglycerol-phosphate synthase subunit H - like protein; protein id: At5g60540.1 | -0.427 | NA |        | -0.592 |
| A016374_01 | At5g60550 | serine/threonine-protein kinase - like protein; protein id: At5g60550.1                | 0.058  |    | 0.23   | 0.16   |
| A016376_01 | At5g56360 | calmodulin-binding protein; protein id: At5g56360.2                                    | 1.238  |    | 0.925  | 0.887  |
| A016378_01 | At5g56210 | unknown protein; protein id: At5g56210.1                                               | -0.431 |    | -0.573 | NA     |
| A016380_01 | At5g57170 | Macrophage migration inhibitory factor (MIF) family; protein id: At5g57170.1           | -0.134 |    | 0.022  | NA     |
| A016382_01 | At5g57180 | putative protein; protein id: At5g57180.1                                              | -0.18  | NA |        | -0.203 |
| A016383_01 | At5g65760 | lysosomal Pro-X carboxypeptidase; protein id: At5g65760.1                              | 0.39   |    | 0.031  | 0.067  |
| A016384_01 | At5g15610 | putative protein; protein id: At5g15610.1                                              | 0.346  |    | 0.386  | 0.311  |
| A016385_01 | At5g51170 | expressed protein; protein id: At5g51170.1                                             | -0.513 | NA |        | -0.091 |
| A016390_01 | At5g16620 | translocon Tic40-like protein; protein id: At5g16620.1                                 | 0.329  |    | 0.438  | -0.039 |
| A016393_01 | At5g59310 | nonspecific lipid-transfer protein precursor - like; protein id: At5g59310.1           | -1.868 |    | -1.856 | -0.973 |
| A016394_01 | At5g58020 | putative protein; protein id: At5g58020.1                                              | -0.391 |    | -0.399 | -0.109 |
| A016399_01 | At5g04740 | putative protein; protein id: At5g04740.1                                              | 0.47   |    | 0.039  | 0.154  |
| A016402_01 | At5g10180 | sulfate transporter; protein id: At5g10180.1                                           | -3.59  |    | -3.533 | -3.527 |
| A016407_01 | At5g47070 | protein serine threonine kinase-like; protein id: At5g47070.1                          | -1.034 | NA |        | -0.631 |
| A016408_01 | At5g47090 | expressed protein; protein id: At5g47090.1                                             | 0.012  | NA |        | -0.227 |
| A016411_01 | At5g03180 | putative protein; protein id: At5g03180.1                                              | -1.91  |    | -1.721 | -1.195 |
| A016412_01 | At5g47110 | Lil3 protein; protein id: At5g47110.1                                                  | -0.296 |    | -0.244 | -0.185 |
| A016416_01 | At5g05410 | putative DREB2A protein                                                                | NA     | NA | NA     | NA     |
| A016417_01 | At5g17380 | 2-hydroxyphytanoyl-CoA lyase-like protein; protein id: At5g17380.1                     | -0.945 |    | -1.071 | -0.352 |
| A016419_01 | At5g46110 | putative phosphate/triose-phosphate translocator; protein id: At5g46110.1              | -0.041 | NA |        | -0.707 |
| A016420_01 | At5g02160 | putative protein                                                                       | -0.266 |    | -0.111 | -0.865 |
| A016421_01 | At5g37510 | NADH dehydrogenase (ubiquinone) (EC 1.6.5.3) 76                                        | 0.284  | NA |        | 0.17   |
| A016422_01 | At5g03290 | putative protein; protein id: At5g03290.1                                              | -0.637 | NA |        | -0.118 |
| A016423_01 | At5g46770 | expressed protein; protein id: At5g46770.1                                             | -0.702 |    | -0.376 | -0.974 |
| A016425_01 | At5g58520 | protein kinase - like; protein id: At5g58520.1                                         | -0.284 |    | -0.438 | -0.896 |
| A016426_01 | At5g13440 | ubiquinol--cytochrome-c reductase - like protein; protein id: At5g13440.1              | -0.425 |    | -0.48  | -0.283 |
| A016431_01 | At5g23550 | putative protein; protein id: At5g23550.1                                              | 0.26   |    | -0.169 | 0.115  |
| A016432_01 | At5g23590 | putative protein; protein id: At5g23590.1                                              | 0.081  |    | -0.128 | -0.287 |
| A016442_01 | At5g52310 | low-temperature-induced protein 78 (sp Q06738); protein id: At5g52310.1                | -1.086 |    | -0.336 | NA     |
| A016443_01 | At5g38470 | DNA repair protein RAD23 homolog; protein id: At5g38470.1                              | -0.179 |    | -0.173 | 0.043  |
| A016444_01 | At5g64730 | G-protein beta-subunit (transducin) family; protein id: At5g64730.1                    | NA     | NA |        | -0.089 |
| A016446_01 | At5g45890 | senescence-specific cysteine protease SAG12; protein id: At5g45890.1                   | -4.781 | NA |        | -2.247 |
| A016447_01 | At5g52540 | putative protein; protein id: At5g52540.1                                              | 1.209  | NA |        | 0.657  |
| A016449_01 | At5g23520 | unknown protein; protein id: At5g23520.1                                               | -0.406 | NA |        | -0.626 |
| A016453_01 | At5g47210 | putative protein; protein id: At5g47210.1                                              | 0.711  |    | 0.491  | 0.69   |
| A016456_01 | At5g48830 | expressed protein; protein id: At5g48830.1                                             | 0.672  | NA | NA     | 0.285  |
| A016458_01 | At5g04470 | putative protein; protein id: At5g04470.1                                              | -0.703 |    | -0.31  | 0.219  |
| A016459_01 | At5g53620 | expressed protein; protein id: At5g53620.1                                             | 0.489  |    | 0.227  | 0.037  |
| A016460_01 | At5g65540 | unknown protein; protein id: At5g65540.1                                               | 0.056  |    | -0.238 | NA     |
| A016462_01 | At5g17420 | cellulose synthase catalytic subunit (IRX3); protein id: At5g17420.1                   | NA     | NA |        | -1.114 |
| A016463_01 | At5g49480 | NaCl-inducible Ca2+-binding protein-like; protein id: At5g49480.1                      | -1.529 |    | -1.205 | -0.501 |
| A016465_01 | At5g53530 | vacuolar sorting protein-like; embryogenesis protein                                   | -0.136 |    | -0.573 | -0.32  |
| A016466_01 | At5g01090 | lectin - like protein; protein id: At5g01090.1                                         | 0.866  |    | 0.775  | 0.875  |
| A016472_01 | At5g46260 | disease resistance protein (TIR-NBS-LRR class), protein id: At5g46260.1                | -1.777 | NA | NA     | NA     |
| A016473_01 | At5g01200 | myb family transcription factor; protein id: At5g01200.1                               | -1.858 |    | -1.411 | -0.369 |
| A016476_01 | At5g60020 | laccase (diphenol oxidase), putative; protein id: At5g60020.1                          | -0.199 |    | -0.545 | NA     |
| A016478_01 | At5g42820 | splicing factor U2AF small subunit, putative; protein id: At5g42820.1                  | 0.473  |    | 0.192  | 0.055  |
| A016483_01 | At5g59950 | RNA and export factor binding protein, putative; protein id: At5g59950.1               | -0.302 | NA |        | 0.195  |
| A016484_01 | At5g16060 | hypothetical protein; protein id: At5g16060.1                                          | 1.016  |    | 0.983  | 0.877  |
| A016494_01 | At5g59790 | putative protein; protein id: At5g59790.1                                              | -0.327 |    | -0.482 | NA     |
| A016502_01 | At5g57900 | SKP1 interacting partner 1 (SKIP1); protein id: At5g57900.1                            | -1.154 |    | -0.858 | -0.258 |
| A016509_01 | At5g16940 | putative protein; protein id: At5g16940.1                                              | 0.039  |    | -0.157 | NA     |
| A016510_01 | At5g56850 | putative protein; protein id: At5g56850.1                                              | 0.324  |    | 0.004  | -0.311 |
| A016511_01 | At5g17010 | sugar transporter - like protein; protein id: At5g17010.1                              | 0.197  |    | 0.456  | 0.17   |
| A016514_01 | At5g17070 | putative protein; protein id: At5g17070.1                                              | 0.324  | NA |        | 0.387  |
| A016516_01 | At5g47690 | putative protein; protein id: At5g47690.1                                              | -0.008 |    | -0.536 | -0.577 |
| A016520_01 | At5g14730 | putative protein; protein id: At5g14730.1                                              | NA     | NA | NA     | NA     |
| A016536_01 | At5g47060 | putative protein; protein id: At5g47060.1                                              | 0.124  | NA |        | 0.067  |
| A016553_01 | At5g15440 | putative protein; protein id: At5g15440.1                                              | -0.301 |    | -0.132 | -0.157 |
| A016565_01 | At5g67590 | putative protein; protein id: At5g67590.1                                              | 0.567  |    | 0.467  | 0.557  |
| A016567_01 | At5g39790 | putative protein; protein id: At5g39790.1                                              | 1.071  |    | 0.813  | 0.138  |
| A016575_01 | At5g67520 | adenylylsulfate kinase-like protein; protein id: At5g67520.1                           | NA     | NA | NA     | NA     |
| A016578_01 | At5g23860 | expressed protein; protein id: At5g23860.1                                             | -0.519 |    | -0.631 | NA     |
|            |           |                                                                                        |        |    |        | 0.249  |

|            |           |                                                          |        |        |        |        |
|------------|-----------|----------------------------------------------------------|--------|--------|--------|--------|
| A016580_01 | At5g53330 | proline-rich cell wall protein-like; protein id: At5g533 | -0.796 | -0.656 | -0.246 | -0.305 |
| A016585_01 | At5g03940 | signal recognition particle 54CP protein precursor; p    | 0.657  | 0.347  | -0.296 | -0.093 |
| A016586_01 | At5g06370 | putative protein; protein id: At5g06370.1                | NA     | NA     | -0.572 | -1.404 |
| A016588_01 | At5g01360 | putative protein; protein id: At5g01360.1                | -2.55  | -2.707 | NA     | NA     |
| A016591_01 | At5g01390 | heat shock protein 40-like; protein id: At5g01390.1      | -0.064 | -0.155 | NA     | 0.172  |
| A016592_01 | At5g01400 | putative protein; protein id: At5g01400.1                | 0.037  | -0.178 | NA     | NA     |
| A016597_01 | At5g01800 | putative protein; protein id: At5g01800.1                | -1.063 | -1.137 | -0.213 | -0.505 |
| A016605_01 | At5g03660 | putative protein; protein id: At5g03660.1                | 0.276  | -0.256 | -0.067 | -0.516 |
| A016612_01 | At5g01990 | putative protein; protein id: At5g01990.1                | -0.64  | -0.323 | -0.47  | -1.434 |
| A016615_01 | At5g02090 | putative protein; protein id: At5g02090.1                | -3.28  | NA     | NA     | NA     |
| A016618_01 | At5g03330 | putative protein; protein id: At5g03330.1                | -0.899 | -1.663 | -1.429 | -1.337 |
| A016623_01 | At5g36210 | acyl-peptide hydrolase-like; protein id: At5g36210.1     | 0.539  | 0.442  | 0.135  | 0.699  |
| A016625_01 | At5g56940 | 30S ribosomal protein S16; protein id: At5g56940.1       | 0.829  | 0.803  | 0.856  | 0.577  |
| A016628_01 | At5g54840 | SGP1 monomeric G-protein (emb CAB54517.1); pr            | -2.134 | NA     | NA     | NA     |
| A016631_01 | At5g55940 | expressed protein; protein id: At5g55940.1               | 0.34   | 0.59   | 0.517  | 0.389  |
| A016633_01 | At5g55900 | sucrose cleavage protein-like; protein id: At5g55900     | 0.107  | NA     | 0.141  | 0.133  |
| A016638_01 | At5g03880 | auxin-regulated protein; protein id: At5g03880.1         | -0.361 | -0.504 | -0.676 | -0.485 |
| A016644_01 | At5g18240 | transfactor-like protein; protein id: At5g18240.1        | -0.995 | NA     | NA     | -1.074 |
| A016645_01 | At5g03990 | putative protein; protein id: At5g03990.1                | -0.564 | NA     | NA     | NA     |
| A016649_01 | At5g04090 | putative protein; protein id: At5g04090.1                | -0.12  | -0.446 | -0.151 | 0.001  |
| A016650_01 | At5g02280 | putative protein; protein id: At5g02280.1                | 0.434  | 0.758  | 0.48   | 0.408  |
| A016651_01 | At5g02310 | eceriferum3 (CER3); protein id: At5g02310.1              | -0.185 | -0.644 | -0.17  | -0.532 |
| A016652_01 | At5g18130 | putative protein; protein id: At5g18130.1                | -2.769 | -2.957 | -1.129 | -2.563 |
| A016656_01 | At5g04440 | putative protein; protein id: At5g04440.1                | -0.705 | -0.548 | -0.232 | -0.454 |
| A016658_01 | At5g04490 | putative protein; protein id: At5g04490.1                | NA     | NA     | -0.177 | -1.367 |
| A016661_01 | At5g04550 | putative protein; protein id: At5g04550.1                | -0.629 | NA     | -0.648 | -0.409 |
| A016662_01 | At5g45760 | G-protein beta family; protein id: At5g45760.1           | 0.565  | NA     | 0.361  | 0.479  |
| A016664_01 | At5g04580 | putative protein; protein id: At5g04580.1                | 0.541  | 0.406  | 0.178  | 0.201  |
| A016665_01 | At5g04600 | RRM-containing protein; protein id: At5g04600.1          | 0.353  | NA     | 0.546  | 0.11   |
| A016673_01 | At5g54630 | putative protein; protein id: At5g54630.1                | 0.331  | 0.289  | 0.577  | 0.412  |
| A016676_01 | At5g02540 | putative protein; protein id: At5g02540.1                | 1.533  | 1.241  | 1.255  | 1.574  |
| A016682_01 | At5g54660 | expressed protein; protein id: At5g54660.1               | -2.083 | -2.075 | -0.561 | -1.718 |
| A016696_01 | At5g02800 | protein kinase - like; protein id: At5g02800.1           | -0.37  | -0.691 | NA     | -0.506 |
| A016697_01 | At5g02830 | putative protein; protein id: At5g02830.1                | -0.049 | -0.281 | NA     | 0.113  |
| A016703_01 | At5g02970 | putative protein; protein id: At5g02970.1                | -1.567 | -1.284 | -0.885 | -0.888 |
| A016705_01 | At5g03050 | putative protein; protein id: At5g03050.1                | 0.011  | 0.371  | NA     | -0.06  |
| A016715_01 | At5g09830 | expressed protein; protein id: At5g09830.1               | -0.445 | -0.163 | -0.022 | -0.672 |
| A016721_01 | At5g07250 | membrane protein; protein id: At5g07250.1                | 0.41   | 0.701  | 0.547  | 0.972  |
| A016723_01 | At5g14520 | pescadillo - like protein; protein id: At5g14520.1       | 0.795  | NA     | 0.408  | 0.694  |
| A016728_01 | At5g14640 | protein kinase MSK-3-like                                | -0.136 | -0.382 | 0.424  | 0.6    |
| A016731_01 | At5g35690 | putative protein; protein id: At5g35690.1                | -0.812 | -1.036 | -0.613 | -0.647 |
| A016735_01 | At5g11970 | putative protein; protein id: At5g11970.1                | -0.655 | -0.849 | -0.111 | -1.19  |
| A016736_01 | At5g12080 | putative protein; protein id: At5g12080.1                | 1.146  | 1.068  | 0.988  | 1.482  |
| A016738_01 | At5g11650 | lysophospholipase - like protein; protein id: At5g116    | -1.178 | -1.052 | NA     | -1.18  |
| A016740_01 | At5g57580 | calmodulin-binding protein; protein id: At5g57580.1      | -0.329 | -0.5   | -0.31  | -0.62  |
| A016742_01 | At5g57460 | unknown protein; protein id: At5g57460.1                 | 0.311  | 0.452  | 0.294  | 0.583  |
| A016750_01 | At5g11450 | oxygen-evolving complex related protein; protein id:     | 0.755  | 0.643  | -0.056 | 0.19   |
| A016751_01 | At5g11480 | putative GTP-binding protein                             | 0.696  | 0.635  | 0.274  | 0.562  |
| A016752_01 | At5g11490 | beta-adaptin-like protein A; protein id: At5g11490.1     | 0.174  | -0.061 | -0.008 | -0.121 |
| A016754_01 | At5g11550 | putative protein; protein id: At5g11550.1                | 1.486  | 1.55   | 1.318  | 1.49   |
| A016756_01 | At5g50960 | nucleotide-binding protein; protein id: At5g50960.1      | -0.331 | -0.215 | 0.046  | -0.207 |
| A016761_01 | At5g14410 | putative protein; protein id: At5g14410.1                | -0.269 | 0.052  | 0.273  | -0.449 |
| A016762_01 | At5g61340 | putative protein; protein id: At5g61340.1                | -1.672 | -1.846 | -0.952 | -2.135 |
| A016767_01 | At5g38380 | unknown protein; protein id: At5g38380.1                 | -0.076 | 0.409  | 0.283  | 0.942  |
| A016786_01 | At5g13500 | putative protein; protein id: At5g13500.1                | -0.194 | NA     | NA     | -0.822 |
| A016794_01 | At5g04260 | thioredoxin - like protein; protein id: At5g04260.1      | -0.372 | NA     | 0.061  | -0.715 |
| A016797_01 | At5g08290 | putative protein; protein id: At5g08290.1                | -0.503 | -0.634 | -0.054 | -0.233 |
| A016803_01 | At5g64340 | unknown protein; protein id: At5g64340.1                 | 0.123  | -0.054 | NA     | NA     |
| A016804_01 | At5g19280 | kinase associated protein phosphatase; protein id: /     | -0.16  | -0.199 | -0.325 | -0.748 |
| A016809_01 | At5g61150 | putative protein; protein id: At5g61150.1                | 0.25   | -0.213 | NA     | 0.025  |
| A016812_01 | At5g08660 | hypothetical protein; protein id: At5g08660.1            | -0.777 | -0.896 | -0.415 | -0.697 |
| A016813_01 | At5g61140 | RNA helicase - like protein; protein id: At5g61140.1     | -0.223 | NA     | -0.29  | -0.35  |
| A016817_01 | At5g60680 | putative protein; protein id: At5g60680.1                | -1.21  | -1.314 | -0.286 | -1.715 |
| A016820_01 | At5g63530 | copper chaperone (CCH)-related; protein id: At5g63       | 0.24   | -0.263 | 0.008  | -0.129 |
| A016827_01 | At5g16480 | putative protein; protein id: At5g16480.1                | 0.071  | NA     | 0.219  | 0.233  |
| A016830_01 | At5g49890 | CLC-c chloride channel protein; protein id: At5g498      | -0.728 | -0.825 | -1.018 | -1.185 |
| A016832_01 | At5g10050 | putative protein; protein id: At5g10050.1                | 0.037  | 0.286  | 0.005  | 0.277  |
| A016836_01 | At5g49630 | amino acid permease 6 (emb CAA65051.1); protein          | -1.83  | -1.645 | -0.662 | -1.494 |

|            |           |                                                           |           |           |        |        |
|------------|-----------|-----------------------------------------------------------|-----------|-----------|--------|--------|
| A016838_01 | At5g05060 | putative protein; protein id: At5g05060.1                 | 0.194     | 0.027     | -0.101 | 0.1    |
| A016839_01 | At5g57520 | CCHH finger protein 2-like protein (pir  S55882); prc     | -1.707 NA |           | -1.089 | -2.834 |
| A016845_01 | At5g35170 | adenylate kinase -like protein; protein id: At5g35170     | -0.352 NA |           | -1.565 | -1.223 |
| A016847_01 | At5g34940 | putative protein; protein id: At5g34940.1                 | -0.668    | -1.244 NA |        | 0.003  |
| A016851_01 | At5g04900 | putative protein; protein id: At5g04900.1                 | -0.355 NA | NA        |        | -0.444 |
| A016853_01 | At5g12140 | cystatin (emb CAA03929.1); protein id: At5g12140.1        | 0.381     | 0.224     | 0.425  | -0.001 |
| A016860_01 | At5g09760 | pectin methylesterase - like protein; protein id: At5g    | 1.007     | 0.905     | 0.967  | 1.306  |
| A016868_01 | At5g10490 | putative protein; protein id: At5g10490.1                 | -0.188 NA |           | -0.449 | -0.484 |
| A016869_01 | At5g10350 | polyadenylate-binding protein II (PAB2), putative; pr     | 0.368     | 0.444     | 0.576  | 0.576  |
| A016873_01 | At5g24400 | 6-phosphogluconolactonase-like protein; protein id:       | 0.509     | 0.441     | 0.537  | 0.618  |
| A016875_01 | At5g13950 | unknown protein; protein id: At5g13950.1                  | -0.178    | -0.477    | -0.469 | -0.605 |
| A016880_01 | At5g19820 | putative protein; protein id: At5g19820.1                 | -0.498    | -1.001    | -0.112 | -0.46  |
| A016883_01 | At5g12980 | putative protein; protein id: At5g12980.1                 | 0.526     | 0.473     | 0.456  | 0.551  |
| A016884_01 | At5g64440 | putative protein; protein id: At5g64440.1                 | 0.281     | 0.096     | 0.298  | 0.552  |
| A016886_01 | At5g24490 | putative protein; protein id: At5g24490.1                 | 0.118     | 0.063 NA  | NA     |        |
| A016888_01 | At5g04170 | EF - hand Calcium binding protein - like; protein id:     | -0.7 NA   | NA        |        | -0.393 |
| A016894_01 | At5g04920 | unknown protein; protein id: At5g04920.1                  | -0.152 NA | NA        |        | -0.384 |
| A016897_01 | At5g66250 | putative protein; protein id: At5g66250.1                 | -0.742    | -0.732    | -0.358 | -0.125 |
| A016898_01 | At5g59430 | telomere repeat-binding protein; protein id: At5g594      | -1.376    | -1.432    | -0.923 | -1.198 |
| A016900_01 | At5g53340 | Avr9 elicitor response protein-like; protein id: At5g5:   | 0.4       | 0.519     | 0.39   | 0.656  |
| A016901_01 | At5g06160 | splicing factor 3a; protein id: At5g06160.1               | 0.342     | 0.247     | 0.402  | 0.595  |
| A016902_01 | At5g54800 | glucose-6-phosphate/phosphate translocator; protei        | -0.011    | 0.375     | 0.375  | 0.525  |
| A016904_01 | At5g11840 | putative protein; protein id: At5g11840.1                 | -1.736    | -1.699    | -1.088 | -1.717 |
| A016905_01 | At5g44785 | expressed protein; protein id: At5g44785.1                | 0.914     | 0.725     | 0.507  | 0.792  |
| A016907_01 | At5g23580 | calcium-dependent protein kinase (pir  S71196); prc       | 1.068     | 1.003     | 0.92   | 1.591  |
| A016909_01 | At5g03220 | putative protein; protein id: At5g03220.1                 | -0.212    | -0.011    | 0.241  | -0.112 |
| A016913_01 | At5g49720 | cellulase homolog OR16pep precursor (pir  S71215          | -0.567    | -0.677    | -0.364 | -0.729 |
| A016914_01 | At5g02240 | putative protein; protein id: At5g02240.1                 | 1.406     | 0.981     | 0.854  | 1.089  |
| A016915_01 | At5g22210 | unknown protein; protein id: At5g22210.1                  | -0.227    | -0.132    | 0.072  | -0.38  |
| A016922_01 | At5g59850 | cytoplasmic ribosomal protein S15a - like; protein id     | 1.051     | 1.069     | 1.053  | 1.435  |
| A016923_01 | At5g14040 | mitochondrial phosphate translocator; protein id: At      | 0.465     | 0.435     | 0.229  | 0.443  |
| A016924_01 | At5g42200 | putative protein; protein id: At5g42200.1                 | -1.6      | -1.283    | -0.64  | -1.424 |
| A016925_01 | At5g65480 | putative protein; protein id: At5g65480.1                 | -0.504    | -0.643    | -0.311 | -0.485 |
| A016926_01 | At5g42890 | putative protein; protein id: At5g42890.1                 | 0.17      | 0.175     | 0.127  | -0.094 |
| A016929_01 | At5g42920 | putative protein; protein id: At5g42920.1                 | 0.778     | 0.723     | 0.775  | 1.143  |
| A016930_01 | At5g60600 | putative protein; protein id: At5g60600.1                 | -0.403    | -0.74     | -0.975 | -0.999 |
| A016931_01 | At5g15020 | transcriptional regulatory - like protein; protein id: At | -0.831    | -0.583 NA | NA     |        |
| A016933_01 | At5g49970 | putative protein; protein id: At5g49970.1                 | -0.04     | 0.027     | -0.102 | 0.203  |
| A016936_01 | At5g64040 | photosystem I reaction center subunit PSI-N precur:       | 0.021     | -0.125    | -0.606 | -1.032 |
| A016937_01 | At5g64570 | glycosyl hydrolase family 3; protein id: At5g64570.1      | -0.447    | -0.639    | -0.387 | -0.554 |
| A016941_01 | At5g43010 | 26S proteasome AAA-ATPase subunit RPT4a; protei           | 0.515     | 0.52      | 0.474  | 0.662  |
| A016943_01 | At5g02290 | serine/threonine-specific protein kinase NAK; protei      | -0.916    | -0.967    | -0.618 | -0.716 |
| A016946_01 | At5g11520 | aspartate aminotransferase (Asp3); protein id: At5g       | -1.002    | -0.873    | -0.311 | -0.445 |
| A016947_01 | At5g65950 | unknown protein; protein id: At5g65950.1                  | 0.097     | 0.145     | 0.293  | 0.332  |
| A016949_01 | At5g17300 | expressed protein; protein id: At5g17300.1                | -0.943    | -1.029    | -0.224 | -0.049 |
| A016950_01 | At5g61790 | calnexin - like protein; protein id: At5g61790.1          | 0.861     | 0.457     | 0.575  | 0.738  |
| A016951_01 | At5g49660 | receptor protein kinase; protein id: At5g49660.1          | -1.638    | -1.839 NA |        | -0.497 |
| A016952_01 | At5g52530 | putative protein; protein id: At5g52530.1                 | -0.243    | -0.397 NA |        | -0.816 |
| A016954_01 | At5g22320 | expressed protein; protein id: At5g22320.1                | 0.502 NA  | NA        |        | 0.8    |
| A016955_01 | At5g38895 | expressed protein; protein id: At5g38895.1                | -1.519 NA | NA        |        | -0.902 |
| A016956_01 | At5g45160 | GTP-binding protein-like; root hair defective 3 protei    | -0.577    | -1.203 NA |        | -1.19  |
| A016959_01 | At5g60710 | putative protein; protein id: At5g60710.1                 | -0.172 NA |           | -0.235 | -0.337 |
| A016960_01 | At5g02880 | putative protein; protein id: At5g02880.1                 | -0.854 NA | NA        |        | -1.478 |
| A016966_01 | At5g63510 | putative protein; protein id: At5g63510.1                 | 0.804     | 0.571     | 0.539  | 0.447  |
| A016967_01 | At5g55570 | unknown protein; protein id: At5g55570.1                  | NA        | NA        | -0.282 | -0.997 |
| A016969_01 | At5g62570 | calmodulin-binding protein; protein id: At5g62570.1       | -1.284    | -1.931    | -0.821 | -0.765 |
| A016971_01 | At5g39520 | expressed protein; protein id: At5g39520.1                | NA        | NA        | NA     | NA     |
| A016976_01 | At5g65470 | putative protein; protein id: At5g65470.1                 | 0.424 NA  |           | 0.132  | 0.246  |
| A016977_01 | At5g50790 | MtN3-like protein; protein id: At5g50790.1                | 0.836     | 0.642     | 0.915  | 0.636  |
| A016978_01 | At5g43560 | unknown protein; protein id: At5g43560.1                  | -0.279    | -0.605 NA |        | -0.462 |
| A016979_01 | At5g23250 | succinyl-CoA synthetase, alpha subunit; protein id: .     | 1.039     | 1.171     | 0.89   | 1.079  |
| A016980_01 | At5g55700 | glycosyl hydrolase family 14 (beta-amylase); proteir      | -0.301    | -0.567    | -1.032 | -1.399 |
| A016984_01 | At5g57990 | ubiquitin-specific protease 23 (UBP23), putative; prc     | 0.316     | 0.184     | 0.212  | 0.136  |
| A016987_01 | At5g47840 | putative protein; protein id: At5g47840.1                 | 0.275     | 0.114     | -0.371 | -0.262 |
| A016991_01 | At5g26780 | glycine hydroxymethyltransferase - like protein; prot     | 0.525     | 0.48      | 0.362  | 0.951  |
| A016997_01 | At5g23110 | putative protein; protein id: At5g23110.1                 | -0.449    | -0.661 NA |        | 0.164  |
| A017000_01 | At5g66930 | putative protein; protein id: At5g66930.1                 | -0.966    | -1.005 NA |        | -0.962 |
| A017002_01 | At5g04410 | putative protein; protein id: At5g04410.1                 | -0.357    | -0.659    | -0.156 | -0.037 |

|            |           |                                                           |           |           |        |        |
|------------|-----------|-----------------------------------------------------------|-----------|-----------|--------|--------|
| A017003_01 | At5g05200 | unknown protein                                           | -1.037    | -0.88     | -1.458 | -1.018 |
| A017004_01 | At5g37380 | putative protein; protein id: At5g37380.1                 | -0.098    | -0.279    | -0.58  | -0.345 |
| A017008_01 | xxxx      | b/t root cap 1 (RCP1); protein id: At5g17520.1 and p      | 0.356 NA  |           | 0.061  | -0.21  |
| A017010_01 | At5g02960 | putative protein; protein id: At5g02960.1                 | 0.726     | 0.588     | 0.515  | 0.929  |
| A017012_01 | At5g61230 | putative protein; protein id: At5g61230.1                 | -0.297    | -0.431    | -0.009 | -0.63  |
| A017013_01 | At5g55530 | putative protein; protein id: At5g55530.1                 | -0.496    | -0.142    | -0.223 | -0.194 |
| A017015_01 | At5g17870 | plastid-specific ribosomal protein 6 precursor (Psrp-     | 0.971     | 0.923     | 0.564  | 0.317  |
| A017016_01 | At5g02450 | 60S ribosomal protein - like; protein id: At5g02450.1     | 0.876     | 0.785     | 0.684  | 0.846  |
| A017020_01 | At5g55910 | serine threonine-specific protein kinase ATPK64 (pi       | -0.441 NA | NA        |        | -0.269 |
| A017021_01 | At5g13560 | putative protein; protein id: At5g13560.1                 | 0.212     | 0.174 NA  |        | -0.289 |
| A017022_01 | At5g41050 | expressed protein; protein id: At5g41050.1                | 0.677     | 0.465     | 0.472  | 0.537  |
| A017024_01 | At5g11770 | NADH dehydrogenase (ubiquinone); protein id: At5g         | -0.357    | 0.067     | -0.022 | -0.432 |
| A017025_01 | At5g47420 | putative protein; protein id: At5g47420.1                 | 0.689 NA  |           | 0.758  | 0.733  |
| A017026_01 | At5g17770 | NADH-cytochrome b5 reductase; protein id: At5g17          | 0.518     | 0.523     | 0.441  | 0.617  |
| A017028_01 | At5g63400 | adenylate kinase; protein id: At5g63400.1                 | 0.682     | 0.506     | 0.473  | 0.402  |
| A017031_01 | At5g15210 | putative protein; protein id: At5g15210.1                 | 0.104     | 0.163     | 0.236  | 0.147  |
| A017032_01 | At5g54810 | tryptophan synthase beta chain 1 precursor (sp P14        | 0.117     | -0.063    | -0.404 | -0.194 |
| A017034_01 | At5g02120 | one helix protein (OHP); protein id: At5g02120.1          | -0.942    | -0.768    | -0.421 | -0.804 |
| A017035_01 | At5g02480 | putative protein; protein id: At5g02480.1                 | -0.445    | -0.57 NA  |        | -0.63  |
| A017036_01 | At5g58290 | 26S proteasome AAA-ATPase subunit RPT3; prote             | 0.08      | -0.119    | 0.012  | 0.245  |
| A017037_01 | At5g26830 | threonyl-tRNA synthetase; protein id: At5g26830.1         | 0.426     | 0.29      | -0.128 | 0.512  |
| A017038_01 | At5g26000 | glycosyl hydrolase family 1, myrosinase precursor; j      | 1.647     | 0.856     | 0.894  | 2.348  |
| A017040_01 | At5g02770 | putative protein; protein id: At5g02770.1                 | -0.175 NA |           | -0.158 | -0.168 |
| A017041_01 | At5g02500 | DnaK-type molecular chaperone hsc70.1; protein id         | -0.076    | -0.146    | 0.472  | 0.917  |
| A017042_01 | At5g64860 | glycosyl hydrolase family 77 (4-alpha-glucanotransf       | 1.383     | 1.383     | 0.505  | 0.907  |
| A017044_01 | At5g64840 | ABC transporter family protein; protein id: At5g6484      | -1.433    | -1.825    | -1.635 | -1.998 |
| A017045_01 | At5g64830 | putative protein; protein id: At5g64830.1                 | 0.167     | 0.162     | 0.142  | 0.574  |
| A017046_01 | At5g24530 | flavanone 3-hydroxylase-like protein; protein id: At5     | -1.216    | -1.215 NA | NA     |        |
| A017048_01 | At5g52650 | putative protein; protein id: At5g52650.1                 | 0.764     | 0.762     | 0.759  | 0.687  |
| A017049_01 | At5g14210 | leucine-rich repeat transmembrane protein kinase, j       | 0.945     | 0.734     | 0.772  | 1.191  |
| A017051_01 | At5g43710 | glycoside hydrolase family 47 family; protein id: At5     | 0.337 NA  | NA        |        | 0.544  |
| A017053_01 | At5g57120 | putative protein; protein id: At5g57120.1                 | 0.36      | 0.243     | 0.483  | 0.396  |
| A017056_01 | At5g64030 | ankyrin-like protein; protein id: At5g64030.1             | 0.563 NA  |           | -0.424 | -0.246 |
| A017057_01 | At5g54120 | unknown protein; protein id: At5g54120.1 NA               | NA        | NA        | -1.137 | -0.894 |
| A017059_01 | At5g64350 | FKBP-type peptidyl-prolyl cis-trans isomerase, puta       | -0.245    | -0.256    | 0.096  | 0.178  |
| A017063_01 | At5g08620 | DEAD/DEAH box RNA helicase, putative                      | 0.769     | 0.93      | 1.091  | 1.751  |
| A017064_01 | At5g66820 | unknown protein; protein id: At5g66820.1                  | -0.351    | -0.178    | 0.219  | 0.08   |
| A017068_01 | At5g28750 | Tha4 protein - like; protein id: At5g28750.1              | -0.04     | 0.124     | 0.049  | -0.303 |
| A017069_01 | At5g43450 | 1-aminocyclopropane-1-carboxylate oxidase; proteir NA     | NA        | NA        | -2.511 | -3.591 |
| A017071_01 | At5g22620 | putative protein; protein id: At5g22620.1,                | -0.097 NA |           | -0.724 | -0.476 |
| A017072_01 | At5g16110 | putative protein; protein id: At5g16110.1                 | -1.687    | -1.598    | -0.784 | -1.55  |
| A017073_01 | At5g23660 | MitN3-like protein; protein id: At5g23660.1               | -2.608    | -2.562    | -1.593 | -2.759 |
| A017075_01 | At5g05170 | putative cellulose synthase catalytic subunit; proteir    | 0.149     | -0.114    | -0.14  | -0.276 |
| A017079_01 | At5g42190 | E3 ubiquitin ligase SCF complex subunit, SKP1/ASI         | -0.407    | -0.56     | -0.056 | -0.366 |
| A017080_01 | At5g60580 | putative protein; protein id: At5g60580.1                 | -0.674    | -0.614    | 0.171  | -0.075 |
| A017083_01 | At5g39600 | putative protein; protein id: At5g39600.1                 | 0.77      | 0.567     | 0.658  | 0.653  |
| A017087_01 | At5g48300 | ADPG pyrophosphorylase small subunit (gb AAC39            | 1.046     | 0.698     | -0.234 | -0.109 |
| A017088_01 | At5g15350 | putative protein; protein id: At5g15350.1                 | 1.369     | 1.031     | 0.327  | 0.509  |
| A017091_01 | At5g05610 | nucleic acid binding protein-like; protein id: At5g056 NA | NA        | NA        | 0.207  | 0.178  |
| A017092_01 | At5g15230 | GASA4; protein id: At5g15230.1                            | 1.341     | 1.124     | 1.068  | 1.368  |
| A017095_01 | At5g58960 | putative protein; protein id: At5g58960.1                 | 1.057 NA  |           | 0.879  | 1.429  |
| A017096_01 | At5g45430 | serine/threonine-protein kinase Mak (male germ cel        | -0.897    | -0.977    | -0.447 | -0.474 |
| A017098_01 | At5g10860 | putative protein; protein id: At5g10860.1                 | -0.721    | -0.903    | -0.295 | -0.242 |
| A017099_01 | At5g54290 | cytochrome c biogenesis protein precursor (gb AAF         | -0.347    | -0.567    | -0.329 | -0.637 |
| A017100_01 | At5g04040 | expressed protein; protein id: At5g04040.1                | -1.128    | -1.025    | -0.753 | -1.054 |
| A017108_01 | At5g43430 | electron transfer flavoprotein beta-subunit-like; prote   | 0.095 NA  |           | 0.097  | -0.222 |
| A017114_01 | At5g53440 | putative protein; protein id: At5g53440.1                 | -0.392    | -0.477    | -0.284 | -0.578 |
| A017115_01 | At5g56250 | unknown protein; protein id: At5g56250.1                  | -0.048 NA |           | -0.649 | -0.657 |
| A017116_01 | At5g62390 | KED - like protein; protein id: At5g62390.1               | 0.964     | 0.46      | 0.428  | 0.555  |
| A017117_01 | At5g51890 | peroxidase, putative; protein id: At5g51890.1             | 0.455     | 0.573     | 0.531  | 0.987  |
| A017120_01 | At5g55660 | putative protein; protein id: At5g55660.1                 | -0.212    | 0.04      | 0.057  | -0.127 |
| A017122_01 | At5g46790 | putative protein; protein id: At5g46790.1                 | -1.387    | -1.416    | -0.589 | -1.632 |
| A017127_01 | At5g39340 | His-Asp Phosphotransfer Signal Transducer AHP3;           | -0.66     | -0.53     | -0.441 | -0.33  |
| A017128_01 | At5g51070 | ATP-dependent Clp protease ATP-binding subunit (          | -2.278    | -2.239    | -1.479 | -1.739 |
| A017130_01 | At5g66570 | photosystem II oxygen-evolving complex 33 (OEC3;          | -0.292    | -0.573    | -0.375 | -0.818 |
| A017135_01 | At5g45880 | Ole e I (main olive allergen)-like protein; protein id: j | -0.694    | -1.052    | -0.914 | -1.516 |
| A017138_01 | At5g01710 | putative protein; protein id: At5g46790.1                 | -0.652    | -0.779    | -0.324 | -0.207 |
| A017139_01 | At5g48150 | scarecrow gene regulator-like; protein id: At5g48150      | -0.319    | -0.139    | 0.452  | 0.774  |

|            |           |                                                         |        |        |        |        |
|------------|-----------|---------------------------------------------------------|--------|--------|--------|--------|
| A017140_01 | At5g16050 | 14-3-3 protein GF14 epsilon (grf5); protein id: At5g1   | -0.249 | -0.033 | 0.212  | 0.151  |
| A017142_01 | At5g08160 | serine/threonine protein kinase; protein id: At5g0816   | 0.038  | 0.31   | 0.261  | 0.698  |
| A017149_01 | At5g48680 | putative protein; protein id: At5g48680.1               | 0.478  | 0.499  | 0.543  | 0.511  |
| A017151_01 | At5g63910 | unknown protein; protein id: At5g63910.1                | -0.287 | NA     | NA     | -0.241 |
| A017153_01 | At5g43930 | putative protein; protein id: At5g43930.1               | NA     | NA     | -1.058 | -1.323 |
| A017160_01 | At5g57800 | lipid transfer protein; glossy1 homolog; protein id: A  | -1.106 | -1.464 | -1.08  | -1.126 |
| A017162_01 | At5g22510 | alkaline/neutral invertase; protein id: At5g22510.1     | -0.417 | -0.138 | -0.388 | -0.172 |
| A017173_01 | At5g54860 | putative protein; protein id: At5g54860.1               | 0.16   | NA     | NA     | 0.205  |
| A017174_01 | At5g12290 | putative protein; protein id: At5g12290.1               | 0.495  | 0.166  | NA     | 0.069  |
| A017178_01 | At5g12390 | putative protein; protein id: At5g12390.1               | -0.468 | -0.68  | -0.436 | -0.984 |
| A017185_01 | At5g61290 | putative protein; protein id: At5g61290.1               | 0.15   | 0.274  | 0.806  | 1.001  |
| A017192_01 | At5g07300 | copine-like protein; protein id: At5g07300.1            | -0.02  | 0.137  | -0.313 | -0.315 |
| A017194_01 | At5g02710 | putative protein; protein id: At5g02710.1               | 0.2    | 0.128  | 0.234  | -0.057 |
| A017195_01 | At5g24510 | 60s acidic ribosomal protein P1; protein id: At5g245 NA | NA     | 0.66   | NA     | 0.409  |
| A017207_01 | At5g55220 | trigger factor-like protein; protein id: At5g55220.1    | 0.824  | 0.571  | 0.454  | 0.878  |
| A017227_01 | At5g06360 | putative protein; protein id: At5g06360.1               | 0.424  | 0.4    | 0.561  | 0.731  |
| A017229_01 | At5g03650 | 1,4-alpha-glucan branching enzyme protein soform        | 0.801  | 0.734  | 0.234  | 0.729  |
| A017235_01 | At5g23120 | photosystem II stability/assembly factor HCF136; pr     | 0.249  | -0.041 | -0.546 | -0.381 |
| A017240_01 | At5g45030 | putative protein; protein id: At5g45030.1               | 0.043  | -0.18  | NA     | 0.4    |
| A017247_01 | At5g20410 | monogalactosyldiacylglycerol synthase; protein id: /    | -0.399 | 0.18   | NA     | NA     |
| A017250_01 | At5g02940 | putative protein; protein id: At5g02940.1               | 0.382  | -0.055 | -1.18  | -0.43  |
| A017257_01 | At5g19150 | putative protein; protein id: At5g19150.1               | -0.025 | 0.102  | -0.009 | 0.496  |
| A017258_01 | At5g59250 | D-xylose-H+ symporter - like protein; protein id: At5g  | 0.221  | 0.224  | -0.272 | -0.156 |
| A017259_01 | At5g13730 | sigma-like factor (gb AAC97954.1); protein id: At5g     | -0.495 | -0.403 | -0.393 | -0.507 |
| A017261_01 | At5g40740 | putative protein; protein id: At5g40740.1               | 0.339  | 0.073  | NA     | 0.154  |
| A017265_01 | At5g66160 | ReMembR-H2 protein JR700 (gb AAF32325.1); pro           | -0.692 | -0.656 | -0.1   | -0.465 |
| A017266_01 | At5g66180 | putative protein; protein id: At5g66180.1               | -0.299 | -0.359 | NA     | -0.048 |
| A017267_01 | At5g46170 | putative protein; protein id: At5g46170.1               | -0.252 | -0.203 | -0.038 | -0.274 |
| A017268_01 | At5g66210 | calcium-dependent protein kinase; protein id: At5g6     | -0.095 | -0.345 | -0.316 | -0.16  |
| A017274_01 | At5g54750 | unknown protein; protein id: At5g40860.1                | 0.446  | 0.487  | 0.395  | 0.422  |
| A017277_01 | At5g17860 | potassium-dependent sodium-calcium exchanger - l        | -1.773 | -1.978 | -1.088 | -1.073 |
| A017279_01 | At5g13190 | putative protein; protein id: At5g13190.1               | -0.558 | -0.463 | -0.176 | -0.9   |
| A017280_01 | At5g35990 | unknown protein; protein id: At5g35990.1                | -0.234 | -0.365 | -0.05  | -0.442 |
| A017284_01 | At5g40690 | putative protein; protein id: At5g40690.1               | -3.608 | NA     | -1.667 | -2.159 |
| A017285_01 | At5g04060 | putative protein; protein id: At5g04060.1               | 0.736  | NA     | 0.317  | 0.541  |
| A017289_01 | At5g18230 | putative protein; protein id: At5g18230.1               | 0.139  | -0.07  | 0.222  | 0.139  |
| A017293_01 | At5g03740 | histone deacetylase -like protein; protein id: At5g03   | 0.995  | 0.808  | 0.668  | 1.118  |
| A017305_01 | At5g62560 | putative protein; protein id: At5g62560.1               | -0.8   | -0.68  | -0.279 | -1.13  |
| A017306_01 | At5g62590 | unknown protein; protein id: At5g62590.1                | -0.844 | -0.482 | NA     | 0.037  |
| A017307_01 | At5g02250 | ribonuclease II-like protein; protein id: At5g02250.1   | 0.113  | 0.105  | NA     | -0.255 |
| A017308_01 | At5g02270 | ABC transporter family protein; protein id: At5g0227    | 0.411  | NA     | NA     | 0.328  |
| A017311_01 | At5g13330 | putative protein; protein id: At5g13330.1               | -1.112 | -1.215 | -0.262 | -0.975 |
| A017312_01 | At5g11330 | 2,6-dihydropyridine 3-hydroxylase (DHPH)-relatec        | -0.423 | -0.592 | -0.379 | -0.099 |
| A017314_01 | At5g09820 | putative protein; protein id: At5g09820.1               | -0.179 | NA     | -0.146 | -0.225 |
| A017315_01 | At5g14380 | arabinogalactan-protein (AGP6); protein id: At5g143     | -0.589 | -0.721 | NA     | NA     |
| A017316_01 | At5g37930 | putative protein; protein id: At5g37930.1               | -0.345 | -0.406 | 0.052  | -0.208 |
| A017321_01 | At5g51980 | putative protein; protein id: At5g51980.1               | 0.294  | 0.252  | 0.469  | 1.002  |
| A017326_01 | At5g52070 | unknown protein; protein id: At5g52070.1                | 0.008  | -0.09  | 0.463  | 0.408  |
| A017327_01 | At5g52110 | putative protein; protein id: At5g52110.1               | 0.552  | 0.537  | 0.424  | 0.266  |
| A017328_01 | At5g41770 | cell cycle control crn (crooked neck) protein-like; prc | 0.37   | 0.263  | NA     | -0.006 |
| A017331_01 | At5g12110 | elongation factor 1B alpha-subunit (emb CAB64729        | 0.79   | 0.806  | 0.606  | 0.47   |
| A017335_01 | At5g10770 | nucleoid DNA-binding protein cnd41 - like protein; p    | -2.325 | -2.427 | -0.042 | -0.518 |
| A017340_01 | At5g39785 | expressed protein; protein id: At5g39785.1              | NA     | NA     | NA     | -0.87  |
| A017341_01 | At5g09880 | RRM-containing protein; protein id: At5g09880.1         | -0.293 | -0.3   | 0.002  | -0.035 |
| A017352_01 | At5g37850 | pyridoxal kinase -like protein; protein id: At5g37850.  | -0.442 | -0.638 | -0.397 | -0.364 |
| A017353_01 | At5g47760 | 4-nitrophenylphosphatase-like protein; protein id: At   | 0.401  | -0.083 | 0.303  | 0.491  |
| A017354_01 | At5g47780 | putative protein; protein id: At5g47780.1               | 0.401  | 0.068  | -0.115 | -0.062 |
| A017360_01 | At5g47860 | putative protein; protein id: At5g47860.1               | -2.283 | -2.277 | -1.339 | -1.955 |
| A017361_01 | At5g47870 | putative protein; protein id: At5g47870.1               | 0.933  | 1.033  | 0.787  | 0.624  |
| A017363_01 | At5g18100 | copper/zinc superoxide dismutase (CSD3); protein i      | 0.112  | 0.157  | -0.323 | -0.442 |
| A017365_01 | At5g42400 | putative protein; protein id: At5g42400.1               | 0.231  | NA     | NA     | 0.039  |
| A017378_01 | At5g61960 | meiosis protein mei2-related; protein id: At5g61960.    | -1.022 | -0.706 | -0.895 | -0.245 |
| A017380_01 | At5g40480 | nuclear pore protein -like; protein id: At5g40480.1     | 1.299  | 1.374  | NA     | 1.53   |
| A017381_01 | At5g09920 | 15.9 kDa subunit of RNA polymerase II (gb AAB952        | -0.162 | -0.247 | 0.099  | 0.277  |
| A017382_01 | At5g07020 | unknown protein                                         | 0.476  | 0.232  | 0.077  | -0.19  |
| A017387_01 | At5g45800 | leucine-rich repeat transmembrane protein kinase, f     | -1.601 | -1.828 | -1.346 | -1.399 |
| A017389_01 | At5g01980 | putative protein; protein id: At5g01980.1               | -0.27  | -0.118 | -0.223 | -0.651 |
| A017393_01 | At5g43300 | putative protein; protein id: At5g43300.1               | -0.415 | -0.566 | NA     | NA     |

|            |           |                                                               |           |           |        |        |
|------------|-----------|---------------------------------------------------------------|-----------|-----------|--------|--------|
| A017394_01 | At5g65870 | putative protein; protein id: At5g65870.1                     | -2.339    | -1.722    | -1.058 | -1.648 |
| A017396_01 | At5g66380 | mitochondrial carrier protein family; protein id: At5g66380.1 | -0.102    | 0.354     | -0.115 | -0.322 |
| A017405_01 | At5g55860 | myosin heavy chain-like; protein id: At5g55860.1              | -0.557 NA | NA        |        | -0.617 |
| A017413_01 | At5g63940 | putative protein; protein id: At5g63940.1                     | 0.756     | 0.691     | 0.514  | 0.872  |
| A017419_01 | At5g47000 | peroxidase, putative; protein id: At5g47000.1                 | -0.374 NA |           | -0.88  | -1.706 |
| A017421_01 | At5g67500 | porin-like protein; protein id: At5g67500.1                   | 0.324 NA  |           | 0.221  | 0.135  |
| A017423_01 | At5g58310 | polyneuridine aldehyde esterase-like; also similar to         | -0.203 NA |           | -0.029 | -1.04  |
| A017425_01 | At5g35700 | putative fimbrin protein; protein id: At5g35700               | 0.313     | 0.311 NA  |        | 0.264  |
| A017431_01 | At5g35440 | putative protein; protein id: At5g35440.1                     | 0.008     | 0.025     | 0.095  | 0.271  |
| A017433_01 | At5g11900 | putative protein; protein id: At5g11900.1                     | 0.517     | 0.47      | 0.453  | 0.618  |
| A017434_01 | At5g23210 | serine carboxypeptidase II-like protein; protein id: A        | -0.677    | -0.674    | -0.742 | -1.264 |
| A017443_01 | At5g11980 | putative protein; protein id: At5g11980.1                     | 0.566     | 0.684 NA  |        | 0.687  |
| A017451_01 | At5g12000 | putative receptor - like kinase; protein id: At5g12000        | -0.649 NA | NA        |        | -1.535 |
| A017452_01 | At5g09990 | expressed protein; protein id: At5g09990.1                    | -0.099    | 0.214     | 0.874  | 0.591  |
| A017460_01 | At5g54690 | putative protein; protein id: At5g54690.1                     | -1.657    | -1.725 NA | NA     |        |
| A017466_01 | At5g11640 | TITL putative protein; protein id: At5g11640.1                | 0.864     | 0.764     | 0.68   | 0.625  |
| A017468_01 | At5g25280 | serine-rich protein; protein id: At5g25280.1                  | -2.63 NA  |           | -1.672 | -1.26  |
| A017471_01 | At5g67560 | ADP-ribosylation factor-like protein; protein id: At5g67560   | -0.272    | -0.213    | 0.171  | 0.335  |
| A017476_01 | At5g02130 | putative protein; protein id: At5g02130.1                     | 0.276     | 0.437 NA  |        | 0.768  |
| A017477_01 | At5g45350 | expressed protein; protein id: At5g45350.1                    | -2.073    | -1.976    | -1.27  | -2.333 |
| A017486_01 | At5g59030 | copper transport protein; protein id: At5g59030.1             | -0.866    | -0.815    | -0.414 | -1.264 |
| A017501_01 | At5g01780 | putative protein; protein id: At5g01780.1                     | -0.031    | -0.021 NA |        | 0.257  |
| A017502_01 | At5g47100 | calcineurin B 1; protein id: At5g47100.1                      | 0.557     | 0.231     | 0.278  | 0.508  |
| A017508_01 | At5g52200 | expressed protein; protein id: At5g52200.1                    | -0.373    | -0.264    | -0.016 | -0.471 |
| A017513_01 | At5g13930 | chalcone synthase; protein id: At5g13930.1;                   | 1.785     | 1.475     | 1.114  | 1.836  |
| A017517_01 | At5g60030 | KED - like protein; protein id: At5g60030.1                   | 0.533     | 0.19      | 0.54   | 0.202  |
| A017534_01 | At5g62360 | DC1.2 homologue - like protein; protein id: At5g62360         | 0.602     | 0.864 NA  | NA     |        |
| A017549_01 | At5g45600 | putative protein; protein id: At5g45600.1                     | 0.717     | 0.186     | 0.511  | 0.823  |
| A017558_01 | At5g44650 | expressed protein; protein id: At5g44650.1                    | 0.174 NA  |           | -0.31  | -0.478 |
| A017559_01 | At5g16950 | putative protein; protein id: At5g16950.1                     | 0.129     | 0.108     | 0.537  | -0.361 |
| A017562_01 | At5g52550 | putative protein; protein id: At5g52550.1                     | -0.658    | -0.702    | -0.567 | -0.719 |
| A017563_01 | At5g17090 | putative protein; protein id: At5g17090.1                     | -0.374    | -0.449    | 0.143  | -0.195 |
| A017564_01 | At5g61420 | myb-related transcription factor(mixta), putative; pro        | -1.655 NA |           | -0.683 | -1.228 |
| A017569_01 | At5g16800 | putative protein; protein id: At5g16800.1                     | -0.439    | -0.419    | 0.005  | 0.196  |
| A017570_01 | At5g14720 | protein kinase -like protein; protein id: At5g14720.1         | 0.067     | -0.424 NA |        | -0.447 |
| A017575_01 | At5g01850 | protein kinase ATN1-like protein; protein id: At5g01850       | -1.181    | -0.775 NA |        | -1.035 |
| A017580_01 | At5g14370 | unknown protein; protein id: At5g14370                        | -0.15     | 0.182     | 0.525  | 0.401  |
| A017581_01 | At5g17560 | putative protein; protein id: At5g17560.1                     | -0.337    | -0.247    | -0.163 | 0.133  |
| A017583_01 | At5g65750 | 2-oxoglutarate dehydrogenase, E1 component; prot              | 0.12      | 0.041 NA  |        | 0.372  |
| A017587_01 | At5g61330 | putative protein; protein id: At5g61330.1                     | 0.37 NA   | NA        |        | 0.551  |
| A017589_01 | At5g14440 | putative protein; protein id: At5g14440.1                     | 0.043     | -0.009    | 0.02   | -0.471 |
| A017593_01 | At5g16150 | sugar transporter-like protein; protein id: At5g16150         | 0.141     | -0.059    | -0.042 | 0.077  |
| A017595_01 | At5g01880 | putative protein; protein id: At5g01880.1                     | -1.577    | -1.483    | -0.58  | -1.581 |
| A017597_01 | At5g65720 | NifS-like aminotransferase; protein id: At5g65720.1           | 0.188     | 0.002     | 0.143  | 0.45   |
| A017600_01 | At5g55140 | putative protein; protein id: At5g55140.1                     | 0.146     | 0.354     | 0.658  | 0.555  |
| A017604_01 | At5g61310 | cytochrome c oxidase subunit - like; protein id: At5g61310    | 0.36      | 0.652     | 0.742  | -0.116 |
| A017612_01 | At5g57550 | xyloglucan endotransglycosylase (XTR3); protein id NA         | NA        |           | -1.874 | -2.348 |
| A017614_01 | At5g35680 | expressed protein; protein id: At5g35680.2                    | -0.397    | -0.46     | -0.04  | -1.052 |
| A017618_01 | At5g18140 | unknown protein; protein id: At5g18140.1                      | -0.501    | -0.517    | -0.215 | -0.454 |
| A017633_01 | At5g67490 | expressed protein; protein id: At5g67490.1                    | -0.465    | 0.138     | 0.047  | -0.298 |
| A017635_01 | At5g67530 | peptidylprolyl isomerase (cyclophilin)-like; protein id       | 0.129 NA  | NA        |        | -0.327 |
| A017636_01 | At5g67540 | glycosyl hydrolase family 43; protein id: At5g67540.          | -0.836 NA |           | -0.56  | -0.497 |
| A017637_01 | At5g67580 | putative protein; protein id: At5g67580.1                     | 0.107 NA  | NA        |        | 0.333  |
| A017640_01 | At5g57910 | putative protein; protein id: At5g57910.1                     | -1.845    | -2.277    | -1.027 | -1.888 |
| A017641_01 | At5g57960 | GTP binding protein-like; protein id: At5g57960.1             | -0.465    | -0.854    | -0.613 | -0.208 |
| A017644_01 | At5g59830 | putative protein; protein id: At5g59830.1                     | -0.05     | -0.565    | 0.026  | 0.22   |
| A017646_01 | At5g59890 | actin depolymerizing factor 4 - like protein                  | -0.185    | -0.368    | -0.309 | -0.071 |
| A017652_01 | At5g53550 | EspB-like protein; protein id: At5g53550.1                    | NA        | NA        | -1.676 | -2.054 |
| A017653_01 | At5g53590 | unknown protein; protein id: At5g53590.1                      | -1.087 NA | NA        |        | -0.603 |
| A017656_01 | At5g45900 | AtAPG7; ubiquitin activating enzyme E1-like protein           | -1.654    | -1.842    | -0.493 | -0.388 |
| A017657_01 | At5g45930 | magnesium chelatase subunit of prochlorophyllide r            | 0.673     | 0.944     | 0.26   | 0.987  |
| A017659_01 | At5g44730 | Dreg-2 like protein; protein id: At5g44730.1                  | 0.644     | 0.591     | 0.579  | 0.608  |
| A017664_01 | At5g46760 | bHLH protein; protein id: At5g46760.1                         | -0.899    | -1.508    | -1.205 | -1.056 |
| A017667_01 | At5g58930 | putative protein; protein id: At5g58930.1                     | 1.156     | 0.788     | 1.083  | 1.791  |
| A017668_01 | At5g52370 | expressed protein; protein id: At5g52370.1                    | 0.622     | 0.484     | 0.407  | -0.004 |
| A017671_01 | At5g44520 | putative protein; protein id: At5g44520.1                     | 0.124     | -0.1      | -0.235 | 0.017  |
| A017672_01 | At5g41930 | unknown protein; protein id: At5g41930.1                      | -0.801    | 0.235     | -0.432 | -0.236 |
| A017692_01 | At5g64930 | CPR5 protein, putative; protein id: At5g64930.1               | -0.352    | -1.046    | -0.676 | -0.404 |

|            |           |                                                         |           |           |          |        |
|------------|-----------|---------------------------------------------------------|-----------|-----------|----------|--------|
| A017693_01 | At5g64960 | cyclin-dependent kinase C;2; protein id: At5g64960.     | 0.042     | -0.039    | 0.385    | 1.089  |
| A017695_01 | At5g58770 | dehydrodolichyl diphosphate synthase (DEDOL-PP          | -3.238 NA |           | -2.29 NA |        |
| A017699_01 | At5g40040 | acidic ribosomal protein P2 -like; protein id: At5g400  | 0.652     | 0.238     | 0.554    | 0.333  |
| A017701_01 | At5g47930 | putative ribosomal protein S27:AT5g47930                | 0.884     | 0.827     | 0.677    | 0.744  |
| A017703_01 | At5g50230 | TIPD, putative; protein id: At5g50230.1                 | -0.313    | -0.534    | -0.129   | -0.174 |
| A017713_01 | At5g47480 | putative protein; protein id: At5g47480.1               | -0.181    | -0.326    | 0.071    | 0.046  |
| A017714_01 | At5g47500 | pectinesterase family; protein id: At5g47500.1          | 1.61      | 1.331     | 1.293    | 1.817  |
| A017715_01 | At5g47550 | putative protein; protein id: At5g47550.1               | -0.703    | -0.141    | 0.364    | 0.366  |
| A017716_01 | At5g47570 | expressed protein; protein id: At5g47570.1              | 0.235     | 0.202     | 0.418    | 0.179  |
| A017718_01 | At5g47620 | heterogeneous nuclear ribonucleoprotein (hnRNP),        | -0.926 NA |           | -0.118   | -0.382 |
| A017726_01 | At5g06780 | putative protein; protein id: At5g06780.1               | 0.159 NA  |           | -0.23    | 0.004  |
| A017734_01 | At5g04990 | unknown protein                                         | -0.014    | 0.027     | -0.045   | 0.243  |
| A017737_01 | At5g38160 | lipid transfer - like protein; protein id: At5g38160.1  | -3.083 NA | NA        | NA       |        |
| A017740_01 | At5g38220 | putative protein; protein id: At5g38220.1               | -0.63     | -1.093 NA |          | -0.006 |
| A017742_01 | At5g22650 | histone deacetylase-like protein; protein id: At5g226   | 0.65      | 0.561     | 0.743    | 0.73   |
| A017743_01 | At5g40300 | putative protein; protein id: At5g40300.1               | -0.012 NA |           | 0.337    | 0.266  |
| A017746_01 | At5g42680 | putative protein; protein id: At5g42680.1               | 0.312     | 0.338     | 0.816    | 0.677  |
| A017749_01 | At5g64090 | unknown protein; protein id: At5g64090.1                | 0.077     | -0.08 NA  |          | 0.011  |
| A017754_01 | At5g62840 | putative protein; protein id: At5g62840.1               | 0.914     | 0.695 NA  |          | 0.65   |
| A017756_01 | At5g16260 | RRM-containing protein; protein id: At5g16260.1         | 0.345     | 0.064     | -0.183   | 0.014  |
| A017757_01 | At5g16280 | putative protein; protein id: At5g16280.1               | 0.268     | 0.106 NA  |          | 0.5    |
| A017758_01 | At5g11070 | putative protein; protein id: At5g11070.1               | -1.604    | -1.714    | -0.81    | -1.587 |
| A017762_01 | At5g09400 | potassium transport protein-like; protein id: At5g094   | 0.138 NA  | NA        |          | -0.75  |
| A017764_01 | At5g61810 | peroxisomal Ca-dependent solute carrier - like prote    | 0.85      | 1.094     | 0.54     | 0.924  |
| A017767_01 | At5g13080 | WRKY family transcription factor; protein id: At5g49 NA | NA        | NA        | NA       |        |
| A017768_01 | At5g13120 | peptidyl-prolyl isomerase protein; protein id: At5g13   | 0.789     | 0.896     | 0.341    | 0.378  |
| A017769_01 | At5g04100 | putative protein; protein id: At5g04100.1               | -0.338 NA |           | -0.297   | -0.103 |
| A017771_01 | At5g04240 | zinc finger protein - like; protein id: At5g04240.1     | -0.235    | -0.073 NA |          | -0.088 |
| A017777_01 | At5g08415 | lipoic acid synthase - like protein; protein id: At5g08 | 0.182     | 0.239 NA  |          | 0.545  |
| A017779_01 | At5g08430 | putative protein; protein id: At5g08430.1               | 0.05      | -0.061    | 0.124    | 0.142  |
| A017782_01 | At5g06970 | putative protein; protein id: At5g06970.1               | 0.7       | 0.305 NA  |          | -0.15  |
| A017783_01 | At5g06980 | expressed protein; protein id: At5g06980.1              | -1.764    | -1.726    | -0.485   | -0.945 |
| A017794_01 | At5g21930 | similar to metal-transporting P-type ATPase; protein    | -0.155 NA |           | -0.391   | -0.775 |
| A017798_01 | At5g22040 | unknown protein; protein id: At5g22040.1                | 0.315     | 0.026     | 0.303    | -0.094 |
| A017799_01 | At5g42080 | dynammin-like protein (pir  S59558); protein id: At5g4  | 0.328     | 0.203     | 0.122    | 0.321  |
| A017801_01 | At5g65930 | putative kinesin calmodulin-binding protein; protein    | 0.43      | 0.462 NA  |          | 0.66   |
| A017803_01 | At5g56290 | peroxisomal targeting signal type 1 receptor; proteir   | -0.1      | -0.792    | -0.531   | -0.412 |
| A017807_01 | At5g13280 | aspartate kinase; protein id: At5g13280.1               | 0.602     | 0.777     | 0.523    | 0.835  |
| A017808_01 | At5g51820 | phosphoglucosyltransferase (emb CAB64725.1); protein ic | 1.135     | 0.97 NA   |          | 0.351  |
| A017812_01 | At5g03140 | receptor like protein kinase; protein id: At5g03140.1   | -0.324 NA | NA        |          | 0.244  |
| A017813_01 | At5g03300 | putative protein; protein id: At5g03300.1               | 0.293     | 0.351     | 0.588    | 0.977  |
| A017815_01 | At4g13261 | hypothetical protein; protein id: At4g13261.1           | 0.339     | 0.046     | 0.921    | 0.554  |
| A017824_01 | At5g35320 | putative protein; protein id: At5g35320.1               | -0.813    | 0.095     | -0.494   | -0.274 |
| A017825_01 | At5g48640 | cyclin C-like protein; protein id: At5g48640.1          | -0.154 NA | NA        |          | 0.27   |
| A017835_01 | At5g09680 | putative protein; protein id: At5g09680.1               | -0.269    | -0.558    | -0.468   | -0.347 |
| A017837_01 | At5g09650 | inorganic pyrophosphatase - like protein; protein id:   | 1.07      | 1.05      | 0.2      | 0.727  |
| A017839_01 | At5g09540 | putative protein; protein id: At5g09540.1               | -0.501    | -0.293    | 0.096    | -0.385 |
| A017845_01 | At5g10460 | putative protein; protein id: At5g10460.1               | -0.167 NA |           | -0.186   | -0.311 |
| A017848_01 | At5g59960 | putative protein; protein id: At5g59960.1               | -1.544 NA |           | -0.974   | -1.501 |
| A017849_01 | At5g63150 | expressed protein; protein id: At5g63150.1              | 0.26      | 0.409     | 0.481    | 0.128  |
| A017850_01 | At5g65860 | unknown protein; protein id: At5g65860.1                | 0.275     | 0.235 NA  |          | 1.166  |
| A017852_01 | At5g64500 | putative protein; protein id: At5g64500.1               | -0.136    | -0.564    | -0.319   | -0.232 |
| A017855_01 | At5g44190 | unknown protein; protein id: At5g44190                  | -0.485    | -0.114    | -0.745   | -1.429 |
| A017856_01 | At5g63670 | expressed protein; protein id: At5g63670.1              | 0.082     | 0.232     | 0.048    | -0.06  |
| A017858_01 | At5g16630 | putative protein; protein id: At5g16630.1               | -0.809    | -1.134 NA |          | -0.936 |
| A017859_01 | At5g53200 | putative protein; protein id: At5g53200.1               | -0.269    | -0.197    | -0.129   | -0.895 |
| A017860_01 | At5g65310 | homeobox-leucine zipper protein ATHB-5 (HD-zip p        | 1.309     | 1.243     | 1.539    | 2.14   |
| A017861_01 | At5g58740 | putative protein; protein id: At5g58740.1               | -0.542    | -0.305    | 0.086    | -0.228 |
| A017863_01 | At5g55300 | DNA topoisomerase I (sp P30181); protein id: At5g5      | 0.161     | 0.079     | -0.131   | 0.254  |
| A017866_01 | At5g51340 | unknown protein; protein id: At5g51340.1                | -0.082    | 0.014 NA  |          | -0.077 |
| A017867_01 | At5g05110 | putative cysteine proteinase inhibitor                  | -1.935    | -2.01     | -1.419   | -1.47  |
| A017868_01 | At5g56460 | protein kinase-like protein; protein id: At5g56460.1    | -1.437 NA |           | -0.949   | -1.332 |
| A017869_01 | At5g57860 | putative protein; protein id: At5g57860.1               | 0.004     | -0.052    | 0.407    | -0.212 |
| A017871_01 | At5g10830 | embryonic abundant protein -like; protein id: At5g10    | -1.164 NA | NA        |          | -0.977 |
| A017872_01 | At5g50380 | putative protein; protein id: At5g50380.1               | -1.056    | -0.95     | -0.57    | -0.39  |
| A017873_01 | At5g22280 | putative protein; protein id: At5g22280.1               | 0.274     | 0.309     | 0.528    | 0.241  |
| A017874_01 | At5g49930 | putative protein; protein id: At5g49930.1               | -0.65     | -0.562 NA |          | -0.427 |
| A017877_01 | At5g67330 | natural resistance-associated macrophage protein;       | -0.598    | -0.337    | -0.709   | -0.066 |



|            |           |                                                                                            |           |           |        |        |
|------------|-----------|--------------------------------------------------------------------------------------------|-----------|-----------|--------|--------|
| A017878_01 | At5g53120 | spermidine synthase; protein id: At5g53120.1                                               | -0.392    | -0.469    | -0.28  | -0.239 |
| A017880_01 | At5g67470 | formin-like protein; protein id: At5g67470.1                                               | 0.761     | 0.372     | 0.432  | 0.524  |
| A017882_01 | At5g13450 | delta subunit of mitochondrial F1-ATPase; protein id: At5g13450.1                          | 0.393     | 0.301     | 0.45   | 0.762  |
| A017885_01 | At5g50370 | adenylate kinase; protein id: At5g50370.1                                                  | 0.772     | 0.631     | 0.815  | 0.949  |
| A017886_01 | At5g52240 | progesterone-binding protein-like; protein id: At5g52240.1                                 | -0.104    | 0.049     | 0.173  | 0.2    |
| A017887_01 | At5g49570 | putative protein; protein id: At5g49570.1                                                  | -0.649 NA | NA        |        | -0.22  |
| A017890_01 | At5g23050 | acetyl-CoA synthetase-like protein; protein id: At5g23050.1                                | -1.054    | -0.985 NA |        | -1.285 |
| A017892_01 | At5g09410 | calmodulin-binding protein; protein id: At5g09410.1                                        | -0.21     | -0.242    | -0.216 | -0.248 |
| A017894_01 | At5g02870 | 60S ribosomal protein - like; protein id: At5g02870.1                                      | 1.489     | 0.908     | 0.89   | 1.718  |
| A017897_01 | At5g64670 | putative protein; protein id: At5g64670.1                                                  | 1.124     | 0.844     | 0.828  | 0.782  |
| A017899_01 | At5g63260 | putative protein; protein id: At5g63260.1                                                  | -0.197 NA |           | 0.185  | -0.077 |
| A017900_01 | At5g60920 | phytochelatin synthetase - like protein; protein id: At5g60920.1                           | 0.532     | 0.508     | -0.08  | -0.021 |
| A017901_01 | At5g07270 | putative protein; protein id: At5g07270.1                                                  | -0.251    | -0.332 NA |        | -0.302 |
| A017902_01 | At5g42050 | putative protein; protein id: At5g42050.1                                                  | -1.328    | -1.284    | -0.874 | -0.816 |
| A017904_01 | At5g23940 | acyltransferase; protein id: At5g23940.1                                                   | 1.668     | 1.444     | 1.298  | 1.807  |
| A017909_01 | At5g47710 | putative protein; protein id: At5g47710.1                                                  | 0.232     | 0.115     | 0.44   | 0.351  |
| A017913_01 | At5g63800 | glycosyl hydrolase family 35 (beta-galactosidase); protein id: At5g63800.1                 | NA        |           | -2.428 | -3.47  |
| A017915_01 | At5g62270 | putative protein; protein id: At5g62270.1                                                  | 1.178     | 1.11      | 0.978  | 1.227  |
| A017916_01 | At5g58970 | uncoupling protein (AtUCP2); protein id: At5g58970.1                                       | 0.5 NA    | NA        |        | 0.43   |
| A017918_01 | At5g06140 | sorting nexin-like protein; protein id: At5g06140.1                                        | -0.029 NA |           | -0.511 | -0.389 |
| A017920_01 | At5g42270 | FtsH protease, putative; protein id: At5g42270.1                                           | -0.223    | -0.46     | -0.51  | -0.403 |
| A017922_01 | At5g04930 | expressed protein; protein id: At5g04930.1                                                 | -0.282    | -0.509    | -0.297 | -0.616 |
| A017923_01 | At5g51040 | putative protein; protein id: At5g51040.1                                                  | -0.475    | -0.604    | -0.181 | -0.427 |
| A017924_01 | At5g61380 | pseudo-response regulator 1; protein id: At5g61380.1                                       | -0.457    | -0.411    | -0.543 | -0.193 |
| A017925_01 | At5g53450 | putative protein; protein id: At5g53450.1                                                  | -1.424    | -1.499    | -1.259 | -1.092 |
| A017928_01 | At5g15810 | N2,N2-dimethylguanine tRNA methyltransferase-like protein; protein id: At5g15810.1         | 0.355     | 0.399     | 0.162  | 0.351  |
| A017933_01 | At5g66470 | GTP-binding protein-like; protein id: At5g66470.1                                          | 0.646     | 0.785     | 0.772  | 0.882  |
| A017934_01 | At5g47880 | eukaryotic release factor 1 homolog (gb AAA91169.1); protein id: At5g47880.1               | -0.267 NA | NA        |        | -0.244 |
| A017935_01 | At5g42310 | maize crp1 protein-like; protein id: At5g42310.1                                           | -0.731    | -1.156    | -1.127 | -1.144 |
| A017936_01 | At5g59220 | protein phosphatase 2C (PP2C); protein id: At5g59220.1                                     | -1.709    | -1.348    | -0.351 | -0.492 |
| A017937_01 | At5g10940 | putative protein; protein id: At5g10940.1                                                  | -0.362    | -0.457 NA |        | -0.458 |
| A017938_01 | At5g06320 | harpin-induced protein-like; protein id: At5g06320.1                                       | -0.918    | -0.839    | -0.676 | -1.45  |
| A017942_01 | At5g22580 | expressed protein; protein id: At5g22580.1                                                 | 1.992     | 1.496     | 1.37   | 1.979  |
| A017945_01 | At5g16840 | RRM-containing protein; protein id: At5g16840.1                                            | -0.277    | -0.432    | -0.006 | -0.079 |
| A017949_01 | At5g22780 | alpha-adaptin C homolog; protein id: At5g22780.1                                           | 0.039     | -0.05     | -0.013 | -0.342 |
| A017950_01 | At5g19370 | peptidyl-prolyl cis-trans isomerase - like protein; protein id: At5g19370.1                | 0.615     | 0.823     | 0.311  | 0.325  |
| A017951_01 | At5g24300 | starch synthase, putative; protein id: At5g24300.1                                         | 0.621     | 0.653     | 0.302  | 0.337  |
| A017952_01 | At5g57940 | cyclic nucleotide-regulated ion channel (CNGC5); protein id: At5g57940.1                   | -0.859    | -0.546    | -0.366 | -0.259 |
| A017955_01 | At5g21105 | expressed protein; protein id: At5g21105.1                                                 | 0.364     | 0.437     | -0.294 | -0.104 |
| A017957_01 | At5g52780 | putative protein; protein id: At5g52780.1                                                  | -0.396    | -0.534    | -0.176 | -0.654 |
| A017962_01 | At5g04720 | disease resistance protein (CC-NBS-LRR class), putative; protein id: At5g04720.1           | -1.361    | -1.057    | -0.649 | -0.553 |
| A017965_01 | At5g20280 | putative sucrose-phosphate synthase; protein id: At5g20280.1                               | -0.078    | -0.157    | 0.045  | -0.195 |
| A017967_01 | At5g03460 | expressed protein; protein id: At5g03460.1                                                 | -0.61     | -0.213    | -0.15  | -0.862 |
| A017971_01 | At5g50810 | small zinc finger-like protein; protein id: At5g50810.1                                    | 0.995     | 1.133     | 0.854  | 1.109  |
| A017972_01 | At5g50000 | protein kinase; protein id: At5g50000.1                                                    | 0.546     | 0.589     | 0.487  | 0.773  |
| A017974_01 | At5g50030 | putative protein; protein id: At5g50030.1                                                  | -0.536    | -0.422    | -0.685 | -1.562 |
| A017975_01 | At5g49980 | transport inhibitor response 1 (TIR1), putative; protein id: At5g49980.1                   | -0.478    | -0.478    | -0.583 | -0.4   |
| A017977_01 | At5g01520 | putative protein; protein id: At5g01520.1                                                  | -2.975 NA |           | -2.064 | -3.214 |
| A017979_01 | At5g02380 | metallothionein 2b; protein id: At5g02380.1                                                | -0.419    | -1.478    | -0.015 | -0.344 |
| A017980_01 | At5g50100 | putative protein; protein id: At5g50100.1                                                  | -1.232    | -1.456    | -0.942 | -1.208 |
| A017982_01 | At5g62790 | 1-deoxy-D-xylulose 5-phosphate reductoisomerase; protein id: At5g62790.1                   | 0.408     | -0.158    | -0.513 | 0.017  |
| A017983_01 | At5g50130 | ribitol dehydrogenase-like; protein id: At5g50130.1 NA                                     | NA        |           | -0.895 | -1.492 |
| A017985_01 | At5g43720 | expressed protein; protein id: At5g43720.1                                                 | -0.047 NA |           | 0.05   | 0.322  |
| A017987_01 | At5g48810 | cytochrome b5 (dbj BAA74840.1); protein id: At5g48810.1                                    | -0.335    | -0.411    | -0.057 | -0.864 |
| A017991_01 | At5g46630 | AP47/50p (gb AAB88283.1); protein id: At5g46630.1                                          | 0.282     | -0.055    | -0.02  | 0.117  |
| A017993_01 | At5g43850 | putative protein; protein id: At5g43850.1                                                  | -1.389    | -1.573    | -0.879 | -1.207 |
| A017994_01 | At5g60460 | protein transport protein subunit - like; protein id: At5g60460.1                          | -0.023    | 0.275     | 0.541  | -0.019 |
| A017995_01 | At5g44030 | cellulose synthase catalytic subunit-like protein; protein id: At5g44030.1                 | -1.82     | -1.999    | -1.138 | -2.121 |
| A017996_01 | At5g18580 | unknown protein; protein id: At5g18580.1                                                   | 0.199     | 0.01      | -0.097 | 0.342  |
| A018000_01 | At5g08300 | succinyl-CoA-ligase alpha subunit; protein id: At5g08300.1                                 | 0.639     | 0.767     | 0.606  | 0.98   |
| A018004_01 | At5g47030 | putative ATP synthase delta chain, mitochondrial; protein id: At5g47030.1                  | 0.149     | 0.087     | 0.046  | -0.094 |
| A018006_01 | At5g24780 | vegetative storage protein Vsp1; protein id: At5g24780.1                                   | 1.778     | 1.097     | 0.572  | 1.281  |
| A018011_01 | At5g45130 | ras-related GTP-binding protein RHA1 (sp P31582); protein id: At5g45130.1                  | -0.38     | -0.795    | -0.519 | -0.595 |
| A018016_01 | At5g17230 | phytoene synthase (geranylgeranyl-diphosphate geranyltransferase); protein id: At5g17230.1 | -0.386    | -0.43     | -0.313 | 0.298  |
| A018017_01 | At5g65050 | MADS-box protein; protein id: At5g65050.1                                                  | 0.12      | -0.166    | 0.118  | -0.184 |
| A018019_01 | At5g14740 | carbonic anhydrase 2; protein id: At5g14740.1                                              | -1.431    | -1.621    | -1.14  | -1.79  |
| A018022_01 | At5g24690 | putative protein; protein id: At5g24690.1                                                  | 0         | -0.046    | -0.215 | -0.256 |
| A018025_01 | At5g56760 | serine O-acetyltransferase (EC 2.3.1.30) Sat-52 (pir); protein id: At5g56760.1             | -0.151    | -0.069    | -0.174 | -0.259 |

|            |           |                                                        |           |           |        |        |
|------------|-----------|--------------------------------------------------------|-----------|-----------|--------|--------|
| A018028_01 | At5g39740 | ribosomal protein L5 - like; protein id: At5g39740.1   | 0.565     | 0.53      | 0.475  | 1.096  |
| A018029_01 | At5g60160 | aspartyl aminopeptidase - like protein; protein id: At | -0.179    | -0.587    | -0.3   | 0.2    |
| A018032_01 | At5g09220 | amino acid transport protein AAP2                      | -1.349    | -1.618    | -0.833 | -0.838 |
| A018034_01 | At5g10030 | bZIP transcription factor, OBF4; protein id: At5g100   | -1.48 NA  | NA        | NA     |        |
| A018038_01 | At5g21090 | leucine-rich repeat protein; protein id: At5g21090.1   | -0.417    | -0.718    | -0.26  | -0.476 |
| A018041_01 | At5g19120 | conglutin gamma - like protein; protein id: At5g1912   | -1.057    | -0.834    | -0.15  | -0.493 |
| A018042_01 | At5g66860 | putative protein; protein id: At5g66860.1              | 0.632     | 0.696     | 0.639  | 0.487  |
| A018043_01 | At5g56190 | WD-repeat protein-like; protein id: At5g56190.1        | -0.721    | -0.755    | -0.445 | -0.384 |
| A018046_01 | At5g08650 | GTP-binding protein LepA, putative; protein id: At5g   | 0.073 NA  |           | -1.043 | -0.763 |
| A018047_01 | At5g23060 | putative protein; protein id: At5g23060.1              | -0.102    | -0.177    | -0.228 | 0.012  |
| A018048_01 | At5g64560 | putative protein; protein id: At5g64560.1              | 0.032     | -0.25     | 0.019  | 0.079  |
| A018049_01 | At5g64580 | putative protein; protein id: At5g64580.1              | 1.105     | 1.095     | 0.264  | 0.673  |
| A018052_01 | At5g61210 | syntaxin SNAP33; protein id: At5g61210.1               | -0.764    | -0.985    | -0.719 | -1.145 |
| A018054_01 | At5g11030 | putative protein; protein id: At5g11030.1              | -0.612    | -0.345    | -0.125 | -0.099 |
| A018058_01 | At5g66170 | senescence-associated protein; protein id: At5g661     | -1.852    | -2.04     | -0.926 | -2.125 |
| A018060_01 | At5g52840 | expressed protein; protein id: At5g52840.1             | 1.118     | 0.833     | 0.74   | 0.331  |
| A018062_01 | At5g40170 | disease resistance protein family; protein id: At5g40  | -0.78 NA  | NA        | NA     |        |
| A018064_01 | At5g50920 | ATP-dependent Clp protease ATP-binding subunit (       | -0.887    | -1.063    | -0.817 | -0.77  |
| A018065_01 | At5g47200 | ras-related small GTP-binding protein-like; protein id | -0.458    | -0.66     | 0.136  | 0.102  |
| A018066_01 | At5g61820 | putative protein; protein id: At5g61820.1              | -2.593    | -2.726    | -1.924 | -2.598 |
| A018067_01 | At5g19760 | putative oxoglutarate/malate translocator protein      | 0.63      | 0.321     | 0.017  | 0.216  |
| A018068_01 | At5g65110 | acyl-CoA oxidase (gb AAC13497.1); protein id: At5g     | -1.063    | -1.169    | -0.778 | -0.564 |
| A018069_01 | At5g65220 | 50S ribosomal protein L29; protein id: At5g65220.1     | 0.341     | 0.513     | 0.443  | 0.26   |
| A018070_01 | At5g47540 | putative protein; protein id: At5g47540.1              | -0.928 NA | NA        |        | -1.115 |
| A018071_01 | At5g46700 | senescence-associated protein 5-like protein; protei   | 1.076     | 1.085     | 0.93   | 1.323  |
| A018072_01 | At5g40580 | 20S proteasome beta subunit PBB2; protein id: At5g     | -0.054    | 0.142     | 0.241  | 0.578  |
| A018074_01 | At5g41340 | E2, ubiquitin-conjugating enzyme 4 (UBC4); protein     | -0.009    | -0.513    | -0.457 | -0.557 |
| A018076_01 | At5g41260 | protein kinase-like; protein id: At5g41260.1           | -0.221 NA | NA        |        | 0.133  |
| A018080_01 | At5g45040 | expressed protein; protein id: At5g45040.1             | -0.237    | 0.154     | -0.145 | -0.337 |
| A018081_01 | At5g24670 | unknown protein; protein id: At5g24670.1               | -0.464    | -0.419    | -0.027 | -0.52  |
| A018085_01 | At5g04850 | expressed protein; protein id: At5g04850.1             | -0.979    | -0.837 NA |        | -1.118 |
| A018088_01 | At5g61410 | ribulose-5-phosphate-3-epimerase; protein id: At5g6    | -0.246    | -0.526    | -0.239 | 0.022  |
| A018089_01 | At5g09660 | microbody NAD-dependent malate dehydrogenase;          | -1.461    | -1.345    | -0.605 | -1.314 |
| A018092_01 | At5g46250 | RRM-containing protein; protein id: At5g46250.1        | -0.523    | -0.444    | -0.209 | -0.442 |
| A018093_01 | At5g45420 | expressed protein; protein id: At5g45420.1             | 0.398 NA  |           | 0.267  | -0.059 |
| A018097_01 | At5g46330 | leucine-rich repeat transmembrane protein kinase, p    | -0.076    | -0.324 NA |        | -0.544 |
| A018098_01 | At5g04590 | sulphite reductase; protein id: At5g04590.1            | -0.003    | -0.272    | -0.777 | -0.75  |
| A018099_01 | At5g49810 | methionine S-methyltransferase (gb AAD49574.1); p      | 0.381     | -0.009    | 0.174  | 0.596  |
| A018100_01 | At5g41080 | putative protein; protein id: At5g41080.1              | 0.255     | -0.076    | 0.202  | -0.164 |
| A018101_01 | At5g23440 | putative protein; protein id: At5g23440.1              | -0.333    | -0.112    | -0.282 | -0.631 |
| A018102_01 | At5g40910 | disease resistance protein (TIR-NBS-LRR class), p      | -0.613    | -0.343    | -0.254 | -0.355 |
| A018103_01 | xxxx      | b/t hypothetical protein; protein id: At5g24710.1 and  | -1.025    | -0.906    | -0.783 | -0.699 |
| A018104_01 | At5g14030 | expressed protein; protein id: At5g14030.1             | 0.575     | 0.415     | 0.268  | 0.014  |
| A018105_01 | At5g04750 | F1F0-ATPase inhibitor - like protein; protein id: At5g | -0.492    | -0.508    | -0.261 | -1.172 |
| A018106_01 | At5g50900 | putative protein; protein id: At5g50900.1              | -0.245 NA |           | -0.418 | -0.473 |
| A018107_01 | At5g08170 | putative protein; protein id: At5g08170.1              | -0.376    | -0.541    | -0.184 | -0.11  |
| A018108_01 | At5g53130 | cyclic nucleotide-regulated ion channel (CNGC1); p     | NA        | NA        |        | -1.029 |
| A018110_01 | At5g59960 | putative protein; protein id: At5g59960.1              | -1.779    | -2.083    | -0.828 | -1.079 |
| A018111_01 | At5g64170 | putative protein; protein id: At5g64170.1              | -0.425    | -0.86     | -0.335 | -0.219 |
| A018115_01 | At5g66120 | 3-dehydroquinate synthase-like protein                 | -0.051    | -0.203    | -0.058 | 0.008  |
| A018117_01 | At5g43680 | unknown protein; protein id: At5g43680.1               | 0.413     | 0.536     | 0.013  | -0.126 |
| A018119_01 | At5g13740 | transporter-like protein; protein id: At5g13740.1      | -0.404    | -0.518    | -0.059 | 0.082  |
| A018126_01 | At5g40870 | uridine kinase-like protein; protein id: At5g40870.1   | 0.66      | 0.603     | 0.432  | 0.697  |
| A018128_01 | At5g47430 | DNA-binding protein-like; protein id: At5g47430.1      | -0.68     | -0.313 NA |        | -0.452 |
| A018135_01 | At5g46620 | putative protein; protein id: At5g46620.1              | 0.197     | 0.008     | 0.588  | 0.582  |
| A018139_01 | At5g13770 | putative protein; protein id: At5g13770.1              | -1.167    | -1.593    | -1.125 | -1.366 |
| A018147_01 | At5g54170 | membrane related protein-like; protein id: At5g5417    | -1.511    | -1.53     | -0.869 | -1.458 |
| A018151_01 | At5g29000 | putative protein; protein id: At5g29000.2              | -0.706    | -0.721    | -0.295 | -0.235 |
| A018153_01 | At5g21020 | putative protein; protein id: At5g21020.1              | -1.729 NA |           | -0.578 | -1.344 |
| A018154_01 | At5g56660 | IAA-amino acid hydrolase (gb AAC04866.1); protei       | -0.788    | -0.696    | -0.568 | -0.356 |
| A018155_01 | At5g12310 | finger-like protein; protein id: At5g12310.1           | NA        | NA        | 0.215  | -0.034 |
| A018156_01 | At5g57350 | plasma membrane ATPase 3 (proton pump) (sp P2          | -1.16     | -1.591    | -0.966 | -1.627 |
| A018157_01 | At5g62540 | ubiquitin-conjugating enzyme E2-17 kd 3ubiquitin-pi    | -1.309    | -0.923    | -0.642 | -1.021 |
| A018159_01 | At5g24160 | squalene monoxygenase 1,2 (squalene epoxidase          | -2.867 NA |           | -1.913 | -3.264 |
| A018163_01 | At5g56840 | putative protein; protein id: At5g56840.1              | -1.278    | -1.303 NA | NA     |        |
| A018171_01 | At5g65250 | expressed protein; protein id: At5g65250.1             | -0.015    | 0.115     | 0.055  | 0.157  |
| A018174_01 | At5g62440 | putative protein; protein id: At5g62440.1              | 0.25      | 0.449     | 0.675  | 0.238  |
| A018175_01 | At5g03690 | fructose-bisphosphate aldolase - like protein; protein | -0.339    | -0.495    | -0.682 | -0.846 |

|            |           |                                                                             |        |        |    |        |        |
|------------|-----------|-----------------------------------------------------------------------------|--------|--------|----|--------|--------|
| A018176_01 | At5g03760 | putative protein; protein id: At5g03760.1                                   | 0.43   | 0.337  | NA |        | 1.028  |
| A018179_01 | At5g02030 | homeodomain protein; protein id: At5g02030.1                                | NA     | NA     |    | -0.107 | -0.191 |
| A018182_01 | At5g03440 | putative protein; protein id: At5g03440.1                                   | 0.08   | 0.281  |    | 0.512  | 0.005  |
| A018183_01 | At5g03455 | rhodanese-like domain protein; protein id: At5g03455.1                      | -0.783 | -0.433 |    | -0.225 | -0.428 |
| A018185_01 | At5g03520 | GTP-binding protein, putative; protein id: At5g03520.1                      | -0.516 | -0.779 |    | 0.341  | 0.199  |
| A018189_01 | At5g04080 | putative protein; protein id: At5g04080.1                                   | -2.234 | -1.572 | NA |        | NA     |
| A018193_01 | At5g04540 | myotubularin - like protein; protein id: At5g04540.1                        | 0.019  | -0.447 | NA |        | NA     |
| A018195_01 | At5g51970 | sorbitol dehydrogenase-like protein; protein id: At5g51970.1                | -1.171 | -1.164 |    | -0.752 | -0.87  |
| A018200_01 | At5g52030 | putative protein; protein id: At5g52030.1                                   | -0.031 | NA     | NA |        | -0.107 |
| A018204_01 | At5g41760 | CMP-sialic acid transporter-like protein; protein id: At5g41760.1           | 0.476  | NA     |    | 0.399  | 0.68   |
| A018205_01 | At5g02620 | ankyrin - like protein; protein id: At5g02620.1                             | -0.545 | -0.689 | NA |        | -0.135 |
| A018206_01 | At5g02630 | putative protein; protein id: At5g02630.1                                   | -0.965 | NA     | NA |        | NA     |
| A018207_01 | At5g18830 | squamosa promoter binding protein-like 7; protein id: At5g18830.1           | 0.217  | -0.05  |    | -0.167 | 0.115  |
| A018210_01 | At5g04710 | aspartyl aminopeptidase -like protein; protein id: At5g04710.1              | 0.305  | 0.02   |    | -0.244 | 0.292  |
| A018211_01 | At5g02740 | putative protein; protein id: At5g02740.1                                   | 0.521  | 0.477  |    | 0.715  | 0.94   |
| A018214_01 | At5g02790 | ln2-1 protein, putative; protein id: At5g02790.1                            | -0.576 | -0.879 |    | -0.406 | -0.734 |
| A018216_01 | At5g02910 | putative protein; protein id: At5g02910.1                                   | -0.425 | -0.5   | NA |        | 0.659  |
| A018226_01 | At5g13470 | putative protein; protein id: At5g13470.1                                   | -0.203 | NA     | NA |        | -0.181 |
| A018234_01 | At5g14530 | putative protein; protein id: At5g14530.1                                   | -0.041 | 0.098  | NA |        | NA     |
| A018237_01 | At5g11890 | putative protein; protein id: At5g11890.1                                   | 1.29   | 1.289  |    | 1.005  | 1.044  |
| A018239_01 | At5g11950 | lysine decarboxylase - like protein; protein id: At5g11950.1                | NA     | NA     | NA |        | NA     |
| A018240_01 | At5g12010 | putative protein; protein id: At5g12010.1                                   | -1.482 | -1.473 |    | -0.433 | -0.779 |
| A018241_01 | At5g11720 | glycosyl hydrolase family 31; protein id: At5g11720.1                       | 0.305  | 0.185  |    | -0.084 | -0.091 |
| A018242_01 | At5g11750 | putative protein; protein id: At5g11750.1                                   | 0.652  | 0.398  |    | 0.577  | 1.135  |
| A018243_01 | At5g11810 | putative protein; protein id: At5g11810.1                                   | 0.299  | -0.014 |    | -0.213 | -0.309 |
| A018248_01 | At5g14250 | COP9 complex subunit 3, FUS11; protein id: At5g14250.1                      | 0.373  | NA     |    | 0.255  | 0.452  |
| A018249_01 | At5g14270 | kinase - like protein; protein id: At5g14270.1                              | NA     | NA     | NA |        | -1.135 |
| A018251_01 | At5g14360 | putative protein; protein id: At5g14360.1                                   | -1.022 | -0.855 |    | -0.065 | -0.352 |
| A018253_01 | At5g42470 | brain and reproductive organ-expressed protein-like                         | -0.319 | NA     |    | -0.552 | -0.553 |
| A018254_01 | At5g14460 | tRNA synthase - like protein; protein id: At5g14460.1                       | 0.489  | 0.443  |    | 0.062  | 0.132  |
| A018256_01 | At5g12860 | 2-oxoglutarate/malate translocator precursor -like protein                  | 0.517  | 0.393  |    | 0.265  | 0.378  |
| A018258_01 | At5g39080 | acyltransferase -like protein; protein id: At5g39080.1                      | -1.343 | -1.154 |    | -0.713 | -1.349 |
| A018259_01 | At5g39090 | acyltransferase -like protein; protein id: At5g39090.1                      | -2.834 | NA     |    | -1.507 | -2.162 |
| A018264_01 | At5g05930 | expressed protein; protein id: At5g05930.1                                  | -1.073 | -0.973 |    | -0.728 | -0.99  |
| A018266_01 | At5g16760 | inositol 1,3,4-Trisphosphate 5/6 kinase; protein id: At5g16760.1            | -0.207 | -0.365 |    | -0.083 | -0.285 |
| A018267_01 | At5g25220 | KNAT3 homeodomain protein; protein id: At5g25220.1                          | -1.252 | -1.354 |    | -0.801 | -0.83  |
| A018269_01 | At5g67300 | putative myb-related protein, 33.3K                                         | -0.156 | -0.297 |    | -0.094 | -0.51  |
| A018270_01 | At5g24120 | sigma-like factor (emb CAA77213.1); protein id: At5g24120.1                 | -2.391 | -2.578 |    | -1.527 | -1.814 |
| A018272_01 | At5g40470 | putative protein; protein id: At5g40470.1                                   | -0.953 | -1.121 |    | -0.628 | -0.156 |
| A018273_01 | At5g08080 | syntaxin SYP132; protein id: At5g08080.1                                    | 0.271  | -0.058 |    | 0.088  | 0.05   |
| A018276_01 | At5g08100 | asparaginase; protein id: At5g08100.1                                       | 0.269  | 0.618  |    | 0.563  | 0.592  |
| A018277_01 | At5g08180 | nhp2-like protein; protein id: At5g08180.1                                  | 1.004  | 0.742  |    | 0.988  | 1.228  |
| A018280_01 | At5g37070 | putative protein; protein id: At5g37070.1                                   | -1.055 | -1.321 |    | -1.023 | -1.447 |
| A018297_01 | At5g47190 | putative protein; protein id: At5g47190.1                                   | 1.173  | 0.735  |    | 0.429  | 0.615  |
| A018300_01 | At5g08050 | putative protein; protein id: At5g08050.1                                   | 0.418  | 0.607  |    | 0.16   | 0.005  |
| A018304_01 | At5g16310 | ubiquitin C-terminal hydrolase-like protein; protein id: At5g16310.1        | 0.262  | 0.267  |    | 0.03   | 0.296  |
| A018307_01 | At5g55850 | NOI protein, nitrate-induced; protein id: At5g55850.1                       | -1.038 | -1.005 |    | -0.377 | -0.72  |
| A018308_01 | At5g16360 | putative protein; protein id: At5g16360.1                                   | -1.022 | -0.984 |    | -0.308 | -0.454 |
| A018312_01 | At5g16505 | expressed protein; protein id: At5g16505.1                                  | 0.05   | 0.171  |    | 0.402  | 0.244  |
| A018314_01 | At5g13570 | unknown protein; protein id: At5g13570.1                                    | -0.483 | -0.737 |    | -0.318 | -0.675 |
| A018315_01 | At5g13610 | putative protein; protein id: At5g13610.1                                   | 0.569  | 0.252  |    | 0.56   | 0.743  |
| A018319_01 | At5g41400 | RING zinc finger protein-like; protein id: At5g41400.1                      | -1.667 | NA     | NA |        | -0.35  |
| A018321_01 | At5g41480 | folylpolyglutamate synthase-like protein; protein id: At5g41480.1           | 0.23   | -0.139 | NA |        | 0.271  |
| A018323_01 | At5g14050 | putative protein; protein id: At5g14050.1                                   | 0.159  | 0.572  |    | 0.53   | 0.637  |
| A018330_01 | At5g42870 | putative protein; protein id: At5g42870.1                                   | -0.368 | -0.307 | NA |        | NA     |
| A018334_01 | At5g58330 | NADP-dependent malate dehydrogenase; protein id: At5g58330.1                | -0.364 | -0.615 |    | -0.438 | -0.662 |
| A018338_01 | At5g55640 | expressed protein; protein id: At5g55640.1                                  | -0.419 | -0.333 |    | -0.169 | -0.68  |
| A018340_01 | At5g55670 | RRM-containing protein; protein id: At5g55670.1                             | -0.078 | NA     |    | -0.108 | -0.413 |
| A018343_01 | At5g57280 | protein carboxyl methylase-like; protein id: At5g57280.1                    | 0.652  | 0.526  |    | 0.797  | 0.733  |
| A018344_01 | At5g57300 | UUbE family; protein id: At5g57300.1                                        | 0.538  | 0.402  |    | 0.302  | 0.339  |
| A018348_01 | At5g56550 | putative protein; protein id: At5g56550.1                                   | -2.498 | -2.716 |    | -1.043 | -1.628 |
| A018349_01 | At5g24030 | putative protein; protein id: At5g24030.1                                   | -0.19  | -0.013 |    | -0.393 | -0.499 |
| A018354_01 | At5g67140 | F-box protein family; protein id: At5g67140.1                               | -1.745 | NA     | NA |        | NA     |
| A018355_01 | At5g67150 | anthranilate N-hydroxycinnamoyl/benzoyltransferase; protein id: At5g67150.1 | 1.252  | 0.873  |    | 0.987  | 1.171  |
| A018357_01 | At5g67210 | putative protein; protein id: At5g67210.1                                   | -0.226 | 0.197  |    | -0.11  | -0.429 |
| A018358_01 | At5g67220 | putative protein; protein id: At5g67220.1                                   | 0.164  | 0.292  |    | 0.055  | 0.744  |
| A018362_01 | At5g39210 | expressed protein; protein id: At5g39210.1                                  | -0.458 | NA     |    | 0.047  | -0.922 |
| A018371_01 | At5g66810 | putative protein; protein id: At5g66810.1                                   | -0.366 | NA     | NA |        | -0.547 |

|            |           |                                                           |        |        |    |        |        |
|------------|-----------|-----------------------------------------------------------|--------|--------|----|--------|--------|
| A018373_01 | At5g60450 | auxin response transcription factor 4; protein id: At5    | 0.028  | -0.06  | NA |        | 0.387  |
| A018377_01 | At5g61510 | quinone oxidoreductase - like protein; protein id: At5    | 0.211  | 0.163  |    | 0.234  | 0.069  |
| A018384_01 | At5g61560 | putative protein; protein id: At5g61560.1                 | -0.421 | NA     | NA |        | -1.319 |
| A018386_01 | At5g48730 | putative protein; protein id: At5g48730.1                 | -0.095 | -0.078 |    | -0.264 | 0.161  |
| A018393_01 | At5g50410 | unknown protein; protein id: At5g50410.1                  | 0.524  | 0.561  |    | 0.709  | 1.071  |
| A018395_01 | At5g40770 | prohibitin (gb AAC49691.1); protein id: At5g40770.1       | 0.912  | 0.939  |    | 0.554  | 1.086  |
| A018397_01 | At5g35460 | putative protein; protein id: At5g35460.1                 | -0.67  | -0.848 |    | -0.402 | -0.307 |
| A018399_01 | At5g40930 | protein import receptor TOM20, mitochondrial-like; p      | -0.099 | -0.239 |    | 0.186  | 0.152  |
| A018406_01 | At5g54540 | putative protein; protein id: At5g54540.1                 | -0.743 | -0.982 |    | -0.352 | -0.789 |
| A018411_01 | At5g24680 | putative protein; protein id: At5g24680.1                 | -0.578 | -0.543 | NA |        | -0.245 |
| A018412_01 | At5g59140 | elongin - like protein; protein id: At5g59140.1           | -0.411 | -0.099 |    | -0.052 | -0.177 |
| A018421_01 | At5g50870 | ubiquitin-conjugating enzyme-like protein; protein id     | -0.044 | 0.132  |    | 0.344  | 0.407  |
| A018423_01 | At5g58120 | disease resistance protein (TIR-NBS-LRR class), p         | -1.899 | NA     |    | -1.169 | -2.191 |
| A018426_01 | At5g53800 | expressed protein; protein id: At5g53800.1                | 0.15   | -0.044 |    | -0.137 | -0.398 |
| A018427_01 | At5g59400 | putative protein; protein id: At5g59400.2                 | -1.355 | -1.261 |    | -0.643 | -1.226 |
| A018428_01 | At5g59480 | putative ripening-related protein - like; protein id: At5 | 1.195  | 0.814  |    | 1.197  | 1.607  |
| A018432_01 | At5g59550 | putative protein; protein id: At5g59550.1                 | -0.694 | -0.603 |    | -0.027 | -0.847 |
| A018440_01 | At5g47140 | GATA zinc finger protein; protein id: At5g47140.1         | -0.69  | -0.78  |    | -0.534 | -0.034 |
| A018442_01 | At5g45110 | regulatory protein NPR1-like; transcription factornhil    | -0.388 | -0.415 |    | -0.315 | -0.158 |
| A018445_01 | At5g48440 | putative protein; protein id: At5g48440.1                 | 0.671  | 0.621  |    | 0.641  | 0.821  |
| A018446_01 | At5g58470 | RNA/ssDNA-binding protein - like; protein id: At5g58      | -0.319 | -0.174 |    | -0.018 | -0.76  |
| A018448_01 | At5g58490 | cinnamoyl-CoA reductase - like protein; protein id: A     | 0.653  | 0.562  |    | 0.323  | 0.143  |
| A018450_01 | At5g48490 | putative protein; protein id: At5g48490.1                 | 0.546  | 0.395  |    | 0.356  | -0.025 |
| A018454_01 | At5g42560 | expressed protein; protein id: At5g42560.1                | -0.294 | -0.619 | NA |        | -0.501 |
| A018460_01 | At5g48140 | polygalacturonase, putative; protein id: At5g48140.1      | -0.423 | -0.573 | NA | NA     |        |
| A018461_01 | At5g56900 | putative protein; protein id: At5g56900.1                 | -0.513 | -0.309 |    | -0.5   | -0.396 |
| A018466_01 | At5g52210 | GTP-binding protein-like; protein id: At5g52210.2         | -0.024 | 0.131  | NA |        | 0.088  |
| A018467_01 | At5g52250 | G-protein beta-subunit (transducin) family; protein id    | -0.272 | NA     |    | 0.588  | 0.291  |
| A018477_01 | At5g50680 | ubiquitin activating enzyme; protein id: At5g50680.1      | -0.091 | -0.011 |    | -0.07  | 0.074  |
| A018480_01 | At5g52520 | prolyl tRNA synthetase; protein id: At5g52520.1           | 0.328  | 0.135  |    | -0.214 | 0.084  |
| A018484_01 | At5g06130 | putative protein; protein id: At5g06130.1                 | -0.281 | -0.323 |    | -0.216 | -0.316 |
| A018486_01 | At5g23390 | putative protein; protein id: At5g23390.1                 | -0.23  | -0.63  |    | -0.14  | -0.447 |
| A018488_01 | At5g65660 | expressed protein; protein id: At5g65660.1                | -0.182 | -0.151 |    | 0.079  | -0.533 |
| A018497_01 | At5g01290 | mRNA capping enzyme - like protein; protein id: At5       | -0.18  | -0.375 |    | -0.231 | -0.215 |
| A018499_01 | At5g54930 | putative protein; protein id: At5g54930.1                 | -0.169 | -0.313 | NA |        | -0.046 |
| A018500_01 | At5g15910 | putative protein; protein id: At5g15910.1                 | -0.02  | -0.076 |    | 0.292  | 0.15   |
| A018501_01 | At5g54980 | putative protein; protein id: At5g54980.1                 | -0.265 | 0.027  |    | 0.273  | -0.594 |
| A018502_01 | At5g15930 | plant adhesion molecule 1 (PAM1); protein id: At5g        | 0.038  | 0.301  |    | -0.07  | 0.195  |
| A018505_01 | At5g03900 | putative protein; protein id: At5g03900.1                 | -0.053 | -0.397 |    | -0.613 | -0.324 |
| A018506_01 | At5g16070 | TCP-1 chaperonin-like protein; protein id: At5g1607       | 1.07   | 0.815  |    | 0.864  | 1.536  |
| A018510_01 | At5g14970 | seed maturation-like protein; protein id: At5g14970.      | -0.748 | -0.92  |    | -0.719 | -0.995 |
| A018516_01 | At5g15110 | pectate lyase -like protein; protein id: At5g15110.1      | -0.146 | -0.536 |    | -1.575 | -1.411 |
| A018517_01 | At5g46020 | expressed protein; protein id: At5g46020.1                | -0.052 | -0.456 |    | 0.075  | 0.198  |
| A018518_01 | At5g46150 | membrane protein common family; protein id: At5g4         | -0.161 | -0.709 | NA |        | -1.019 |
| A018519_01 | At5g16880 | TOM (target of myb1) -like protein; protein id: At5g1     | -0.553 | -1.037 |    | -0.522 | -0.592 |
| A018520_01 | At5g06290 | 2-cys peroxiredoxin-like protein; protein id: At5g062     | 0.658  | 0.99   |    | 0.293  | 0.137  |
| A018522_01 | At5g06340 | diadenosine 5,5'-P1,P4-tetraphosphate hydrolase-lik       | 0.147  | -0.018 |    | 0.221  | -0.076 |
| A018523_01 | At5g06350 | cytochrome p450, putative; protein id: At5g38450.1        | 0.245  | 0.09   | NA |        | 0.474  |
| A018528_01 | At5g59610 | putative protein; protein id: At5g59610.1                 | 0.177  | NA     | NA | NA     |        |
| A018530_01 | At5g59650 | serine/threonine-specific protein kinase - like; protei   | -0.218 | -0.189 | NA |        | -0.211 |
| A018531_01 | At5g59750 | GTP cyclohydrolase II / 3,4-dihydroxy-2-butanone-4        | -0.901 | NA     |    | -1.21  | -1.701 |
| A018533_01 | At5g16660 | putative protein; similar to unknown protein (gb AAF      | -0.254 | -0.056 |    | -0.667 | -0.899 |
| A018536_01 | At5g17690 | chromo domain protein; protein id: At5g17690.1            | 0.175  | -0.089 | NA |        | 0.349  |
| A018545_01 | At5g63410 | leucine-rich repeat transmembrane protein kinase, p       | 0.667  | 0.257  |    | 0.39   | 1.27   |
| A018554_01 | At5g43130 | putative protein; protein id: At5g43130.1                 | -0.215 | -0.358 |    | -0.813 | -1.12  |
| A018560_01 | At5g17610 | expressed protein; protein id: At5g17610.1                | -0.101 | 0.195  |    | -0.011 | -0.623 |
| A018561_01 | At5g64270 | nuclear protein-like; protein id: At5g64270.1             | -0.258 | -0.533 |    | 0.005  | 0.075  |
| A018563_01 | At5g64380 | fructose-bisphosphatase-like; protein id: At5g64380       | -0.016 | NA     |    | 0.041  | -0.093 |
| A018564_01 | At5g04880 | unknown protein; protein id: At5g04880.1                  | -1.138 | -1.161 |    | -0.682 | -1.024 |
| A018566_01 | At5g63010 | unknown protein; protein id: At5g63010.1                  | 0.14   | NA     | NA |        | 0.099  |
| A018568_01 | At5g15550 | G-protein beta family; protein id: At5g15550.1            | 0.045  | NA     |    | 0.517  | 0.308  |
| A018575_01 | At5g16180 | putative protein; protein id: At5g16180.1                 | -0.174 | -0.301 |    | -0.514 | -0.533 |
| A018581_01 | At5g52450 | efflux family protein, putative; protein id: At5g52450    | -1.264 | -1.371 |    | -1.047 | -1.5   |
| A018583_01 | At5g36250 | protein phosphatase 2C PP2C; protein id: At5g3625         | -0.477 | -0.625 |    | -0.216 | -0.278 |
| A018587_01 | At5g60050 | putative protein; protein id: At5g60050.1                 | -0.375 | -0.56  | NA | NA     |        |
| A018589_01 | At5g01970 | putative protein; protein id: At5g01970.1                 | 0.345  | 0.248  | NA |        | 0.579  |
| A018590_01 | At5g01960 | expressed protein; protein id: At5g01960.1                | -0.513 | -0.866 |    | -0.339 | -0.659 |
| A018591_01 | At5g59210 | putative protein; protein id: At5g59210.1                 | -0.34  | -0.255 |    | -0.067 | 0.132  |

|            |           |                                                         |           |           |        |        |
|------------|-----------|---------------------------------------------------------|-----------|-----------|--------|--------|
| A018598_01 | At5g53250 | arabinogalactan-protein, putative (AGP22); protein i    | NA        | NA        | NA     |        |
| A018600_01 | At5g62350 | ripening-related protein - like; protein id: At5g62350  | 0.818     | 0.554     | -0.683 | -0.403 |
| A018604_01 | At5g14800 | pyrroline-5-carboxylate reductase; protein id: At5g14   | 0.207     | 0.284     | 0.219  | 0.364  |
| A018607_01 | At5g54530 | putative protein; protein id: At5g54530.1               | -1.405    | -1.003    | -0.722 | -1.99  |
| A018613_01 | At5g03530 | putative protein; protein id: At5g03530.1               | -0.057    | -0.141    | 0.658  | 0.985  |
| A018617_01 | At5g42300 | ubiquitin-like protein; protein id: At5g42300.1         | -0.172    | -0.225    | -0.15  | -0.688 |
| A018618_01 | At5g23090 | TATA-binding protein-associated phosphoprotein D        | -1.09     | -0.727    | -0.316 | 0.044  |
| A018620_01 | At5g19570 | putative protein; protein id: At5g19570.1               | 0.458     | 0.687     | 0.601  | 0.5    |
| A018621_01 | At5g63340 | unknown protein; protein id: At5g63340.1                | -0.016    | -0.088    | 0.001  | -0.019 |
| A018625_01 | At5g12400 | putative protein; protein id: At5g12400.1               | -2.554    | -2.886    | -1.231 | -2.508 |
| A018628_01 | At5g07920 | diacylglycerol kinase (ATDGK1); protein id: At5g079     | -0.421    | -0.429    | -0.529 | -0.816 |
| A018630_01 | At5g05860 | glucuronosyl transferase-like protein; protein id: At5  | -0.728    | -0.91     | -0.708 | -0.91  |
| A018635_01 | At5g61980 | GCN4-complementing protein - like; protein id: At5g     | 0.675     | 0.757     | 0.271  | -0.292 |
| A018637_01 | At5g52630 | selenium-binding protein-like; protein id: At5g52630    | -1.242    | -1.474    | -1.08  | -1.38  |
| A018638_01 | At5g46220 | putative protein; protein id: At5g46220.1               | 1.338     | 1.33      | 0.934  | 1.315  |
| A018647_01 | At5g57930 | putative protein; protein id: At5g57930.1               | 0.322     | 0.604     | 0.281  | 0.142  |
| A018649_01 | At5g37490 | putative protein; protein id: At5g37490.1               | -0.052    | -0.029    | 0.145  | 0.462  |
| A018652_01 | At5g53840 | F-box protein family, AtFBL13; protein id: At5g5384 NA  | NA        |           | -0.103 | -0.302 |
| A018655_01 | At5g52950 | putative protein; protein id: At5g52950.1               | -1.616 NA |           | -1.067 | -1.334 |
| A018662_01 | At5g35540 | putative protein; protein id: At5g35540.1               | 1.503     | 1.2       | 0.69   | 1.021  |
| A018663_01 | At5g50020 | putative protein; protein id: At5g50020.1               | 0.411     | 0.257     | 0.308  | 0.403  |
| A018665_01 | At5g35475 | similar to Ac-like transposase; protein id: At5g35475   | -1.274    | -1.171    | -0.758 | -0.457 |
| A018666_01 | At5g35470 | unknown protein; protein id: At5g35470.1                | 0.091 NA  | NA        |        | -0.355 |
| A018667_01 | At5g17970 | disease resistance protein (TIR-NBS-LRR class), pr      | -0.419    | -0.184    | -0.079 | -0.354 |
| A018672_01 | At5g35170 | adenylate kinase -like protein; protein id: At5g35170   | -1.519    | -1.137    | -0.428 | -0.838 |
| A018673_01 | At5g01920 | putative protein; protein id: At5g01920.1               | -1.9      | -1.938    | -1.037 | -1.415 |
| A018675_01 | At5g53540 | 26S proteasome regulatory particle chain RPT6-like      | 0.315 NA  |           | 0.12   | -0.122 |
| A018678_01 | At5g55560 | putative protein; protein id: At5g55560.1               | 0.381     | 0.354     | 0.462  | 0.833  |
| A018682_01 | At5g53640 | heat shock transcription factor HSF30-like protein; p   | -0.861    | -0.885    | -0.391 | -0.025 |
| A018686_01 | At5g52640 | heat-shock protein; protein id: At5g52640.1             | 0.034     | -0.252    | 0.006  | -0.832 |
| A018687_01 | At5g45850 | putative protein; protein id: At5g45850.1               | -2.216 NA | NA        | NA     |        |
| A018688_01 | At5g66390 | peroxidase, putative; protein id: At5g66390.1           | -0.622    | -0.626    | -0.327 | 0.221  |
| A018694_01 | At5g22550 | putative protein; protein id: At5g22550.1               | 1.177     | 0.823     | 0.66   | 1.235  |
| A018696_01 | At5g45940 | putative protein; protein id: At5g45940.1               | -0.642    | -0.695    | -0.696 | -0.723 |
| A018699_01 | At5g06590 | unknown protein; protein id: At5g06590.1                | -1.131 NA | NA        | NA     |        |
| A018707_01 | At5g43980 | putative protein; protein id: At5g43980.1               | -0.188    | -0.456    | -0.366 | -0.175 |
| A018708_01 | At5g59690 | histone H4 - like protein; protein id: At5g59690.1      | -0.593    | -0.458    | -0.201 | -0.223 |
| A018709_01 | At5g44780 | unknown protein; protein id: At5g44780.1                | -1.146    | -1.181    | -0.53  | -0.835 |
| A018710_01 | At5g54790 | unknown protein; protein id: At5g54790.1                | 0.106     | 0.103     | 0.118  | 0.114  |
| A018711_01 | At5g44820 | putative protein; protein id: At5g44820.1               | 0.735     | 0.574     | -0.227 | -0.623 |
| A018712_01 | At5g48870 | U6 snRNA-associated Sm-like protein-like; protein i     | 0.545     | 0.345     | 0.23   | 0.665  |
| A018714_01 | At5g57020 | N-myristoyl transferase; protein id: At5g57020.1        | -0.16     | -0.49     | 0.295  | 0.764  |
| A018715_01 | At5g10750 | putative protein; protein id: At5g10750.1               | -2.028    | -2.314    | -1.455 | -1.656 |
| A018717_01 | At5g16300 | low density lipoprotein B-like protein; protein id: At5 | 0.063     | 0.131     | 0.178  | 0.423  |
| A018720_01 | At5g46780 | expressed protein; protein id: At5g46780.1              | -0.395    | -0.706    | -0.237 | -0.848 |
| A018723_01 | At5g22350 | putative protein; protein id: At5g22350.1               | -0.428    | -0.676    | -0.174 | -0.121 |
| A018737_01 | At5g64310 | arabinogalactan-protein (AGP1); protein id: At5g643     | -0.061    | 0.098     | 0.011  | -0.061 |
| A018742_01 | At5g36290 | transmembrane protein FT27/PFT27-like; protein id       | -0.07     | -0.109    | -0.296 | -0.374 |
| A018746_01 | At5g48720 | putative protein; protein id: At5g48720.1               | -0.997 NA | NA        | NA     |        |
| A018753_01 | At5g05220 | expressed protein; protein id: At5g05220.1              | -0.649 NA |           | -0.832 | -1.363 |
| A018758_01 | At5g41870 | polygalacturonase, putative; protein id: At5g41870.1    | 0.734     | -0.093    | -0.139 | -0.257 |
| A018771_01 | At5g44900 | disease resistance protein (TIR class), putative; pro   | -0.155 NA | NA        |        | -0.771 |
| A018772_01 | At5g42140 | TMV resistance protein-like; protein id: At5g42140.1    | -0.408    | -0.811    | -0.345 | -0.572 |
| A018774_01 | At5g44950 | F-box protein; protein id: At5g44950.1                  | -0.762    | -0.933    | -0.11  | 0.009  |
| A018778_01 | At5g12940 | leucine rich repeat protein family; protein id: At5g12  | 0.312     | 0.398     | 0.316  | 0.089  |
| A018779_01 | At5g45000 | disease resistance protein (TIR class), putative; pro   | -0.423    | -0.644 NA |        | -0.434 |
| A018781_01 | At5g17670 | putative protein; protein id: At5g17670.1               | -1.24     | -1.083    | -1.343 | -0.875 |
| A018786_01 | At5g60530 | late embryonic abundant protein                         | -0.389    | -0.851    | -0.25  | -0.309 |
| A018793_01 | At5g48460 | fimbrin 2 (gb AAB97844.1); protein id: At5g48460.1      | 0.038 NA  | NA        |        | -0.338 |
| A018795_01 | At5g65410 | hypothetical protein common family; protein id: At5g    | 0.476     | 0.318     | 0.373  | 0.728  |
| A018803_01 | At5g65430 | 14-3-3 protein GF14 kappa (grf8); protein id: At5g65    | 1.624     | 0.798     | 0.727  | 1.203  |
| A018807_01 | At5g40200 | DegP protease; protein id: At5g40200.1                  | 0.798 NA  |           | 0.611  | 0.398  |
| A018809_01 | At5g15950 | S-adenosylmethionine decarboxylase (adoMetDC2)          | 0.504     | 0.195     | 0.09   | 0.528  |
| A018810_01 | At5g13800 | putative protein; protein id: At5g13800.1               | -0.413    | -0.423 NA |        | -0.633 |
| A018812_01 | At5g40280 | farnesyltransferase beta subunit (ERA1) (protein far    | -0.213    | -0.163    | 0.212  | 0.48   |
| A018814_01 | At5g39220 | putative protein; protein id: At5g39220.1               | -0.078    | -0.588    | -0.044 | 0.064  |
| A018815_01 | At5g65990 | amino acid transporter protein-like; protein id: At5g6  | -0.486    | -0.301    | 0.05   | -0.589 |
| A018816_01 | At5g61190 | putative protein; protein id: At5g61190.1               | 0.522     | 0.56 NA   |        | 0.162  |

|            |           |                                                         |           |           |          |        |
|------------|-----------|---------------------------------------------------------|-----------|-----------|----------|--------|
| A018818_01 | At5g41700 | E2, ubiquitin-conjugating enzyme 8 (UBC8); protein      | -1.155    | -1.232    | -0.695   | -0.363 |
| A018819_01 | At5g66050 | unknown protein; protein id: At5g66050.1                | -0.164 NA |           | 0.064    | -0.092 |
| A018820_01 | At5g41020 | putative protein; protein id: At5g41020.1               | -0.174    | -0.63     | -0.071   | -0.04  |
| A018823_01 | At5g40960 | putative protein; protein id: At5g40960.1               | -2.45     | -2.275    | -0.932   | -1.816 |
| A018826_01 | At5g12470 | unknown protein                                         | 0.224     | -0.099    | 0.52     | 0.469  |
| A018827_01 | At5g54870 | putative protein; protein id: At5g54870.1               | -1.741    | -2.16     | -1.303   | -1.52  |
| A018828_01 | At5g57490 | porin-like protein; protein id: At5g57490.1             | 0.35      | 0.125     | 0.303    | 0.223  |
| A018832_01 | At5g64200 | unknown protein; protein id: At5g64200                  | 0.215     | 0.157 NA  |          | 0.207  |
| A018833_01 | At5g46800 | mitochondrial carrier protein family; protein id: At5g- | 0.209     | 0.048     | 0.2      | 0.45   |
| A018834_01 | At5g64880 | expressed protein; protein id: At5g64880.1              | -0.842    | -0.531    | -0.253   | -0.967 |
| A018840_01 | At5g40950 | 50S ribosomal protein L27; protein id: At5g40950.1      | 0.695     | 0.627     | 0.368    | 0.094  |
| A018841_01 | At5g57040 | putative protein; protein id: At5g57040.1               | -1.219    | -0.994    | -0.981   | -1.408 |
| A018842_01 | At5g51400 | putative protein; protein id: At5g51400.1               | -0.14     | -0.221    | 0.093    | -0.599 |
| A018844_01 | At5g43940 | alcohol dehydrogenase (EC 1.1.1.1) class III (pir  S)   | 0.75      | 0.497     | 0.711    | 1.168  |
| A018848_01 | At5g65000 | putative protein; protein id: At5g65000.1               | 0.307     | 0.295     | 0.529    | 0.67   |
| A018849_01 | At5g39360 | putative protein; protein id: At5g39360.1               | -0.028    | 0.347     | 0.745    | 1.154  |
| A018851_01 | At5g65960 | expressed protein; protein id: At5g65960.1              | 0.064     | -0.048    | -0.198   | -0.11  |
| A018852_01 | At5g49650 | xylulose kinase; protein id: At5g49650.1                | -0.148    | -0.307    | -0.369   | -0.604 |
| A018862_01 | At5g46840 | RRM-containing protein; protein id: At5g46840.1         | 0.415     | 0.101     | -0.376   | -0.193 |
| A018863_01 | At5g23540 | 26S proteasome regulatory subunit (RPN11), putati       | 0.164     | -0.061    | 0.143    | 0.454  |
| A018864_01 | At5g51300 | splicing factor 1 (SF1), putative; protein id: At5g513  | -0.274    | -0.02     | 0.309    | -0.135 |
| A018867_01 | At5g56600 | profilin-like protein; protein id: At5g56600.1          | 0.309     | 0.271     | 0.269    | 0.32   |
| A018869_01 | At5g60670 | 60S ribosomal protein L12 - like; protein id: At5g606   | 1.017     | 1.194     | 1.128 NA |        |
| A018871_01 | At5g42360 | putative protein; protein id: At5g42360.1               | 0.48      | -0.021 NA |          | 0.101  |
| A018875_01 | At5g56750 | pollen specific protein SF21; protein id: At5g56750.    | -0.386    | -0.184    | -0.817   | -0.695 |
| A018889_01 | At5g65180 | expressed protein; protein id: At5g65180.1              | -0.036    | -0.298    | 0.25     | 0.261  |
| A018891_01 | At5g20630 | germin-like protein; protein id: At5g20630.1            | 0.984     | 1.103     | 1.528    | 2.022  |
| A018894_01 | At5g08120 | putative myosin heavy chain                             | 0.702     | 0.48      | 0.371    | 0.619  |
| A018896_01 | At5g23450 | expressed protein; protein id: At5g23450.1              | -0.276    | -0.247    | -0.763   | -0.956 |
| A018897_01 | At5g65840 | unknown protein; protein id: At5g65840.1                | -0.13     | -0.132    | -0.207   | -0.524 |
| A018899_01 | At5g52510 | scarecrow transcriptional regulator-like; protein id: A | -0.256    | -0.271 NA |          | 0.035  |
| A018904_01 | At5g58575 | putative protein; protein id: At5g58575.1               | -0.612    | -0.515 NA |          | -0.501 |
| A018906_01 | At5g50180 | protein kinase ATN1-like protein; protein id: At5g50    | 0.389     | -0.021    | 0.354    | 0.828  |
| A018908_01 | At5g12350 | putative protein; protein id: At5g12350.1               | 0.073     | -0.261 NA |          | -0.457 |
| A018909_01 | At5g64140 | 40S ribosomal protein S28 (sp P34789); protein id: .    | 1.112     | 1.093     | 1.195    | 0.976  |
| A018911_01 | At5g19140 | aluminium-induced protein - like; protein id: At5g19    | -2.894    | -2.717    | -1.687   | -2.288 |
| A018912_01 | At5g50250 | chloroplast RNA-binding protein cp31, putative; prot    | 0.26      | 0.1       | 0.055    | -0.157 |
| A018914_01 | At5g51830 | fructokinase 1; protein id: At5g51830.1                 | -0.297    | -0.152    | -0.072   | -0.218 |
| A018915_01 | At5g65440 | putative protein; protein id: At5g65440.1               | 1.014     | 1.119     | 0.918    | 1.092  |
| A018919_01 | At5g58140 | non phototropic hypocotyl 1-like; protein id: At5g581   | -0.414    | -0.504 NA |          | -0.245 |
| A018920_01 | At5g12210 | geranylgeranyl transferase type II beta subunit (RAI    | -0.335    | -0.161    | 0.134    | 0.098  |
| A018921_01 | At5g49920 | unknown protein; protein id: At5g49920.1                | -0.235    | -0.607 NA | NA       |        |
| A018922_01 | At5g44340 | putative tubulin beta-4 chain                           | 0.606     | 0.482     | 0.495    | 0.78   |
| A018924_01 | At5g49990 | permease; protein id: At5g49990.1                       | -0.38     | -0.512    | 0.083    | 0.248  |
| A018925_01 | At5g46180 | ornithine aminotransferase; protein id: At5g46180.1     | -0.969    | -1.071    | -0.758   | -0.689 |
| A018931_01 | At5g52100 | dihydrodipicolinate reductase-like protein; protein id  | 0.421     | 0.301     | -0.085   | -0.17  |
| A018932_01 | At5g04140 | ferredoxin-dependent glutamate synthase; protein ic     | -0.577    | -1.122    | -0.535   | -0.673 |
| A018933_01 | At5g13550 | sulfate transporter; protein id: At5g13550.1            | -0.942    | -1.131    | -0.918   | -1.087 |
| A018934_01 | At5g58410 | unknown protein; protein id: At5g58410.1                | -1.136    | -1.271    | -1.081   | -1.483 |
| A018935_01 | At5g50800 | MtN3-like protein; protein id: At5g50800.1              | -2.444    | -2.271 NA | NA       |        |
| A018936_01 | At5g63520 | F-box protein family; protein id: At5g63520.1           | -0.2      | 0.017     | -0.069   | -0.096 |
| A018937_01 | At5g41800 | amino acid permease-like protein; proline transport     | -2.521 NA | NA        | NA       |        |
| A018942_01 | At5g24520 | Ttg1 protein (emb CAB45372.1); protein id: At5g24       | -0.755    | -0.933    | -0.429   | -0.308 |
| A018949_01 | At5g22270 | putative protein; protein id: At5g22270.1               | -1.652 NA |           | -0.504   | -1.816 |
| A018950_01 | At5g39730 | avirulence induced gene (AIG) - like protein; protein   | 0.292     | 0.144     | 0.088 NA |        |
| A018952_01 | At5g39590 | putative protein; protein id: At5g39590.1               | -0.813    | -0.508    | -0.81    | -0.791 |
| A018955_01 | At5g36890 | glycosyl hydrolase family 1; protein id: At5g36890.1    | 1.006     | 0.81      | 0.435    | 0.761  |
| A018959_01 | At5g11860 | putative protein; protein id: At5g11860.1               | -0.483    | -0.768    | -0.08    | -0.291 |
| A018961_01 | At5g36950 | DegP protease; protein id: At5g36950.1                  | 0.758     | 0.592 NA  |          | 0.804  |
| A018963_01 | At5g38830 | cysteine-tRNA ligase -like protein; protein id: At5g3   | NA        |           | -0.175   | -0.013 |
| A018964_01 | At5g56180 | putative protein; protein id: At5g56180.1               | -0.862 NA |           | -0.795   | -1.354 |
| A018970_01 | At5g38860 | putative protein; protein id: At5g38860.1               | 0.159     | -0.114 NA |          | 0.421  |
| A018973_01 | At5g22360 | synaptobrevin-like protein; protein id: At5g22360.1     | 0.071     | -0.337    | -0.399   | -0.524 |
| A018974_01 | At5g23340 | putative protein; protein id: At5g23340.1               | -0.565    | -0.888    | -0.216   | -0.167 |
| A018975_01 | At5g47650 | MutT domain protein-like; protein id: At5g47650.1       | -0.675    | -0.77 NA  |          | 0.148  |
| A018979_01 | At5g47720 | acetoacetyl-CoA-thiolase; protein id: At5g47720.1       | -0.317 NA |           | -0.289   | -0.336 |
| A018982_01 | At5g24450 | putative protein; protein id: At5g24450.1               | 0.061     | -0.133    | -0.167   | 0.163  |
| A018983_01 | At5g27410 | putative amino acid aminotransferase; protein id: At    | 0.141 NA  | NA        |          | 0.59   |

|            |           |                                                        |        |        |    |        |        |
|------------|-----------|--------------------------------------------------------|--------|--------|----|--------|--------|
| A018986_01 | At5g47640 | putative protein; protein id: At5g47640.1              | -1.673 | -1.734 | NA |        | -0.065 |
| A018988_01 | At5g42960 | putative protein; protein id: At5g42960.1              | 0.371  | 0.341  |    | 0.362  | 0.506  |
| A018991_01 | At5g21940 | unknown protein; protein id: At5g21940.1               | -2.242 | -1.446 |    | -0.42  | -0.745 |
| A018992_01 | At5g47890 | NADH dehydrogenase 10.5K chain-like protein; pro       | 0.374  | 0.273  |    | 0.269  | -0.189 |
| A018998_01 | At5g40710 | zinc finger - like protein; protein id: At5g40710.1    | 0.071  | NA     |    | -0.082 | -0.354 |
| A019000_01 | At5g67370 | putative protein; protein id: At5g67370.1              | -1.468 | NA     |    | -1.217 | -1.527 |
| A019002_01 | At5g22460 | putative protein; protein id: At5g22460.1              | -0.09  | -0.028 |    | 0.656  | 0.526  |
| A019012_01 | At5g39040 | ABC transporter family protein; protein id: At5g3904   | 0.077  | -0.159 |    | -0.063 | 0.039  |
| A019014_01 | At5g47560 | sodium-dicarboxylate cotransporter-like; protein id: . | -2.129 | -1.837 |    | -0.987 | -2.016 |
| A019017_01 | At5g55030 | putative protein; protein id: At5g55030.1              | 0.039  | NA     | NA |        | -1.086 |
| A019021_01 | At5g57360 | F-box protein ZTL/LKP1/ADO1, AtFBX2b; protein id       | -0.646 | -0.626 |    | -0.479 | -0.713 |
| A019022_01 | At5g66090 | expressed protein; protein id: At5g66090.1             | 0.185  | 0.573  |    | -0.501 | -1.27  |
| A019026_01 | At5g60570 | putative protein; protein id: At5g60570.1              | 0.289  | NA     |    | 0.192  | 0.263  |
| A019027_01 | At5g13980 | glycosyl hydrolase family 38 (alpha-mannosidase); j    | 1.085  | 0.639  |    | 0.358  | 0.112  |
| A019032_01 | At5g66530 | apospory-associated protein C-like; protein id: At5g   | 1.116  | 0.919  |    | 0.422  | 0.841  |
| A019033_01 | At5g16030 | putative protein with poly glutamic acid stretch; prot | 0.15   | 0.098  | NA |        | 0.24   |
| A019040_01 | At5g35590 | 20S proteasome alpha subunit A1 (PAA1); protein i      | 0.208  | 0.135  |    | 0.238  | 0.441  |
| A019041_01 | xxxx      | b/t putative protein; protein id: At5g14310.1 and rib  | 0.837  | 0.848  |    | 0.285  | 0.699  |
| A019043_01 | At5g13820 | H-protein promoter binding factor-1 (gb)AAC24592. NA   |        | NA     | NA | NA     |        |
| A019046_01 | At5g57630 | SNF1 related protein kinase-like protein; protein id:  | -1.866 | NA     |    | -2.343 | NA     |
| A019047_01 | At5g65900 | DEAD/DEAH box RNA helicase protein, putative; pr       | 0.877  | 0.496  |    | 0.357  | 0.88   |
| A019049_01 | At5g19430 | putative protein; protein id: At5g19430.1              | -0.504 | -0.428 |    | 0.192  | 0.026  |
| A019050_01 | At5g27560 | putative protein; protein id: At5g27560.1              | -0.195 | -0.048 |    | -0.362 | -0.23  |
| A019053_01 | At5g41520 | putative protein; protein id: At5g41520.1              | 0.255  | 0.382  |    | 0.536  | 0.53   |
| A019057_01 | At5g43260 | expressed protein; protein id: At5g43260.1             | -2.309 | -1.8   |    | -1.191 | -2.316 |
| A019059_01 | At5g41560 | unknown protein; protein id: At5g41560.1               | 0.037  | -0.6   |    | 0.277  | -0.762 |
| A019060_01 | At5g20900 | putative protein; protein id: At5g20900.1              | -0.502 | -0.633 |    | -0.337 | -0.296 |
| A019064_01 | At5g36170 | translation releasing factor RF-2; protein id: At5g36  | 0.008  | 0.109  |    | -0.006 | 0.149  |
| A019068_01 | At5g10570 | bHLH protein; protein id: At5g10570.1                  | 0.021  | NA     | NA |        | -0.752 |
| A019074_01 | At5g09570 | putative protein; protein id: At5g09570.1              | 0.856  | NA     |    | 0.745  | 1.041  |
| A019081_01 | At5g15360 | putative protein; protein id: At5g15360.1              | -0.094 | -0.019 |    | 0.12   | -0.072 |
| A019086_01 | At5g15140 | putative aldose 1-epimerase - like protein; protein ic | -0.499 | -0.692 |    | -1.18  | -1.367 |
| A019089_01 | At5g16715 | valine--tRNA ligase-like protein; protein id: At5g167  | 0.656  | 0.486  |    | -0.047 | -0.003 |
| A019092_01 | At5g35220 | putative protein; protein id: At5g35220.1              | 0.153  | -0.017 |    | 0.023  | 0.168  |
| A019094_01 | At5g35110 | putative protein; protein id: At5g35110.1              | -0.547 | -0.452 | NA | NA     |        |
| A019098_01 | At5g16400 | thioredoxin f2 (gb)AAD35004.1); protein id: At5g164    | 0.375  | 0.176  |    | 0.084  | -0.303 |
| A019106_01 | At5g58230 | WD-40 repeat protein MSI1 (sp)O22467); also highl      | 0.746  | 0.417  |    | 0.587  | 1.138  |
| A019110_01 | At5g03280 | putative protein; protein id: At5g03280.1              | -0.606 | -0.518 |    | -0.363 | -0.094 |
| A019116_01 | At5g08060 | unknown protein; protein id: At5g08060                 | 0.389  | 0.455  |    | 0.424  | -0.082 |
| A019127_01 | At5g61130 | glycosyl hydrolase family 17; protein id: At5g61130.   | 1.59   | 1.303  |    | 1.023  | 1.089  |
| A019139_01 | At5g67110 | putative protein; protein id: At5g67110.1              | -1.109 | -0.889 |    | 0.063  | -0.083 |
| A019143_01 | At5g21920 | unknown protein; protein id: At5g21920.1               | 0.748  | 0.699  |    | 0.35   | -0.204 |
| A019145_01 | At5g22740 | glucosyltransferase-like protein; protein id: At5g227. | 1.401  | 1.111  |    | 0.978  | 1.176  |
| A019146_01 | At5g27210 | putative protein; protein id: At5g27210.1              | 0.078  | 0.008  |    | 0.248  | 0.507  |
| A019151_01 | At5g15750 | ribosomal protein-like; protein id: At5g15750.1        | 0.455  | 0.333  |    | 0.7    | 0.908  |
| A019155_01 | At5g15730 | serine/threonine-specific protein kinase-like protein; | 0.125  | 0.032  |    | 0.091  | 0.017  |
| A019171_01 | At5g54680 | bHLH protein; protein id: At5g54680.1                  | -0.342 | NA     |    | 0.038  | -0.23  |
| A019174_01 | At5g54730 | putative protein; protein id: At5g54730.1              | -2.214 | NA     |    | -1.249 | -2.289 |
| A019181_01 | At5g64160 | expressed protein; protein id: At5g64160.1             | 0.037  | NA     |    | 0.138  | -0.397 |
| A019186_01 | At5g13140 | putative protein; protein id: At5g13140.1              | 1.31   | 0.98   |    | 0.867  | 0.916  |
| A019187_01 | At5g60960 | putative protein; protein id: At5g60960.1              | 0.875  | 0.686  |    | 0.527  | 1.038  |
| A019188_01 | At5g13090 | putative protein; protein id: At5g13090.1              | -0.458 | -0.381 |    | 0.001  | -0.637 |
| A019192_01 | At5g09330 | putative protein; protein id: At5g09330.1              | 0.069  | -0.256 |    | 0.194  | 0.24   |
| A019196_01 | At5g09230 | SIR2-family protein; protein id: At5g09230.1           | 0.085  | -0.023 | NA |        | 0.174  |
| A019200_01 | At5g62980 | dihydroneopterin aldolase-like protein; protein id: At | 0.155  | 0.401  |    | 0.291  | -0.438 |
| A019206_01 | At5g16270 | putative protein; protein id: At5g16270.1              | -0.078 | -0.429 |    | -0.083 | 0.075  |
| A019211_01 | At5g10780 | putative protein; protein id: At5g10780.1              | -0.547 | -0.281 |    | -0.105 | -0.552 |
| A019213_01 | At5g51180 | unknown protein                                        | -1.254 | -1.857 |    | -0.619 | -0.614 |
| A019216_01 | At5g11390 | putative protein; protein id: At5g11390.1              | -0.172 | -0.563 | NA |        | -0.148 |
| A019229_01 | At5g45360 | F-box protein family; protein id: At5g45360.1          | -0.376 | -0.639 |    | -0.325 | -0.239 |
| A019231_01 | At5g58130 | putative protein; protein id: At5g58130.1              | 0.055  | 0.238  | NA |        | -0.461 |
| A019244_01 | At5g59560 | putative protein; protein id: At5g59560.1              | 0.224  | 0.119  |    | 0.206  | 0.472  |
| A019247_01 | At5g06860 | polygalacturonase inhibiting protein (PGIP1); protei   | -1.983 | NA     |    | -1.455 | -1.614 |
| A019249_01 | At5g60910 | MADS-box protein; protein id: At5g60910.1              | -0.543 | -0.942 |    | -0.473 | -0.332 |
| A019252_01 | At5g11060 | homeobox protein knotted-1 like 4 (KNAT4); protein     | -1.984 | -2.006 |    | -1.516 | -1.405 |
| A019253_01 | At5g51880 | expressed protein; protein id: At5g51880.1             | -0.201 | -0.264 |    | 0.03   | -0.114 |
| A019255_01 | At5g60620 | putative protein; protein id: At5g60620.1              | -0.176 | -0.076 |    | -0.291 | 0.055  |
| A019261_01 | At5g55230 | putative protein; protein id: At5g55230.1              | 0.875  | 0.801  |    | 0.534  | 0.723  |

|            |               |                                                                          |           |           |          |        |
|------------|---------------|--------------------------------------------------------------------------|-----------|-----------|----------|--------|
| A019274_01 | At5g66440     | putative protein; protein id: At5g66440.1                                | NA        | -0.934    | -0.077   | -0.258 |
| A019281_01 | At5g14420     | putative protein; protein id: At5g14420.1                                | -0.708    | -0.702 NA | -0.61    |        |
| A019289_01 | At5g14240     | putative protein; protein id: At5g14240.1                                | 0.279     | 0.452     | 0.238    | -0.076 |
| A019291_01 | At5g46580     | putative protein; protein id: At5g46580.1                                | 0.878     | 0.478     | 0.2      | 0.551  |
| A019293_01 | At5g11560     | putative protein; protein id: At5g11560.1                                | 0.44 NA   |           | -0.181   | -0.181 |
| A019301_01 | At5g47040     | Lon protease homolog 1 precursor; protein id: At5g47040.1                | -0.713    | -0.678    | -1.209   | -1.692 |
| A019303_01 | At5g56130     | putative protein; protein id: At5g56130.1                                | 0.356 NA  |           | 0.179    | -0.013 |
| A019305_01 | At5g37300     | putative protein; protein id: At5g37300.1                                | 1.015     | 0.704     | 1.483    | 2.165  |
| A019308_01 | At5g11740     | arabinogalactan-protein (AGP15); protein id: At5g11740.1                 | 0.054     | -0.026    | 0.208    | -0.19  |
| A019312_01 | At5g53170     | FtsH protease, putative; protein id: At5g53170.1                         | -0.27     | -0.796    | -0.772   | -0.447 |
| A019318_01 | At5g11670     | NADP dependent malic enzyme - like protein; protein id: At5g11670.1      | -0.228    | -0.41     | -0.468   | -0.79  |
| A019324_01 | At5g23310     | iron superoxide dismutase (FSD3); protein id: At5g23310.1                | 1.09      | 1.181     | 0.875    | 1.379  |
| A019325_01 | At5g16010     | steroid 5alpha-reductase-like protein; protein id: At5g16010.1           | 0.638     | 0.738     | -0.227   | -0.628 |
| A019326_01 | At5g23330     | expressed protein; protein id: At5g23330.1                               | 0.061     | 0.11 NA   |          | -0.065 |
| A019328_01 | At5g11910     | putative esterase - like protein; protein id: At5g11910.1                | -0.487    | -0.749    | -0.411   | -0.127 |
| A019330_01 | At5g14910     | putative protein; protein id: At5g14910.1                                | 0.459     | 0.56      | 0.189    | 0.055  |
| A019331_01 | At5g14940     | oligopeptide transporter -like protein; protein id: At5g14940.1          | NA        | NA        | NA       | NA     |
| A019336_01 | At5g12230     | unknown protein; protein id: At5g12230.1                                 | -0.45     | -0.79     | -0.21    | -0.454 |
| A019338_01 | At5g14680     | putative protein; protein id: At5g14680.1                                | -0.549    | -0.636    | -0.313   | -0.539 |
| A019340_01 | At5g14660     | putative protein; protein id: At5g14660.1                                | NA        | 0.532     | 0.191    | 0.165  |
| A019343_01 | At5g35730     | expressed protein; protein id: At5g35730.1                               | 0.414     | 0.456     | 0.075    | 0.369  |
| A019353_01 | At5g63210     | putative protein; protein id: At5g63210.1                                | 0.139 NA  | NA        | NA       | NA     |
| A019356_01 | At5g07100     | WRKY family transcription factor; protein id: At5g07100.1                | NA        | NA        | NA       | NA     |
| A019358_01 | At5g13400     | peptide transporter - like protein; protein id: At5g13400.1              | 0.24      | 0.394     | 0.11     | 0.055  |
| A019361_01 | At5g16680     | putative protein; protein id: At5g16680.1                                | -0.595    | -0.91     | -0.33    | -0.762 |
| A019367_01 | At5g16780     | putative protein; protein id: At5g16780.1                                | 0.341     | -0.003    | -0.012   | -0.042 |
| A019372_01 | At5g14710     | putative protein; protein id: At5g14710.1                                | -0.314    | -0.115    | 0.076    | -0.568 |
| A019383_01 | At5g14880     | putative cation transport protein; protein id: At5g14880.1               | -1.446    | -1.311    | -1.052   | -1.481 |
| A019387_01 | At5g17400     | ADP/ATP translocase-like protein; protein id: At5g17400.1                | -0.057 NA | NA        | NA       | NA     |
| A019395_01 | At5g39400     | PTEN -like protein; protein id: At5g39400.1                              | -0.69     | -0.546 NA | NA       | NA     |
| A019398_01 | At5g04430     | KH domain protein Nova, putative; protein id: At5g04430.1                | 0.769     | 0.602     | 0.34     | 0.346  |
| A019400_01 | At5g18110     | eukaryotic cap-binding protein (gbl)AAC17220.1); protein id: At5g18110.1 | -0.216    | -0.31     | 0.02     | -0.134 |
| A019403_01 | At5g15400     | ubiquitin-fusion degradation protein-like; protein id: At5g15400.1       | 0.07      | -0.582 NA |          | -0.276 |
| A019407_01 | At5g15450     | HSP100/ClpB, putative; protein id: At5g15450.1                           | 0.41      | -0.039    | -0.328   | 0.019  |
| A019411_01 | At5g18250     | putative protein; protein id: At5g18250.1                                | -0.546 NA |           | 0.001    | -0.469 |
| A019414_01 | At5g03900     | putative protein; protein id: At5g03900.1                                | -0.411    | -0.363    | -0.354   | -0.381 |
| A019419_01 | At5g03540     | putative protein; protein id: At5g03540.1                                | 0.063     | -0.36     | -0.458   | -0.282 |
| A019423_01 | At5g52360     | actin depolymerizing factor-like; protein id: At5g52360.1                | -0.412 NA | NA        | NA       | NA     |
| A019424_01 | At5g03490     | putative protein; protein id: At5g03490.1                                | NA        | NA        | -0.88 NA | NA     |
| A019425_01 | At3g12580     | heat shock protein 70; protein id: At3g12580.1                           | -1.866    | -1.499    | -0.22    | 0.301  |
| A019428_01 | At3g50530     | CDPK-related protein kinase; protein id: At3g50530.1                     | 0.205     | 0.088     | 0.37     | 0.917  |
| A019429_01 | At2g47800     | glutathione-conjugate transporter AtMRP4; protein id: At2g47800.1        | -2.163    | -1.865 NA |          | -0.461 |
| A019431_01 | At5g35790     | glucose-6-phosphate dehydrogenase; protein id: At5g35790.1               | -0.249    | -0.595    | -0.405   | -0.219 |
| A019436_01 | At5g13490     | adenosine nucleotide translocator; protein id: At5g13490.1               | 0.268     | 0.599     | 0.194    | 0.494  |
| A019438_01 | At1g25490     | phosphoprotein phosphatase 2A, regulatory subunit                        | 0.198     | 0.22      | 0.221    | 0.47   |
| A019442_01 | At2g47580     | small nuclear ribonucleoprotein U1A; protein id: At2g47580.1             | 0.798     | 0.915 NA  |          | 0.331  |
| A019443_01 | At1g09760     | putative U2 small nuclear ribonucleoprotein A (U2 S                      | 0.533     | 0.606     | 0.592    | 0.986  |
| A019444_01 | At3g08690     | E2, ubiquitin-conjugating enzyme 11 (UBC11); prote                       | -1.434    | -0.952    | -0.589   | -0.437 |
| A019445_01 | not annotated | between At2g02750 and At2g02760: Chr2 W/77282                            | -0.606    | -0.643    | -0.283   | -0.515 |
| A019447_01 | At1g68990     | DNA-directed RNA polymerase; protein id: At1g68990.1                     | 0.476     | 0.619     | 0.832    | 1.374  |
| A019451_01 | At1g64060     | cytochrome b245 beta chain homolog RbohAp108,                            | -2.312    | -1.829    | -1.202   | -0.696 |
| A019456_01 | At1g10210     | putative mitogen-activated protein kinase, MAP Kin                       | -0.613 NA |           | -0.842   | -0.876 |
| A019457_01 | At2g18170     | MAP kinase (ATMPK7); protein id: At2g18170.1                             | -0.956    | -0.63     | -1.034   | -0.764 |
| A019458_01 | At4g27180     | kinesin-like protein B (katB); protein id: At4g27180.1                   | 0.343     | 0.172     | 0.452    | 1.038  |
| A019460_01 | At5g03730     | compared to genome                                                       | -0.375    | -0.354    | -0.516   | -0.964 |
| A019461_01 | At3g50500     | protein kinase SPK-2; protein id: At3g50500.1                            | -0.475    | -0.502    | -0.494   | -0.506 |
| A019465_01 | At1g72750     | inner mitochondrial membrane protein; protein id: A                      | -0.043 NA |           | 0.096    | -0.416 |
| A019466_01 | At5g54250     | cyclic nucleotide-regulated ion channel (CNGC4); p                       | -1.367    | -1.408    | -1.237   | -1.641 |
| A019469_01 | At4g34870     | peptidylprolyl isomerase (cyclophilin); protein id: At4                  | 0.734     | 0.798     | 0.745    | 0.876  |
| A019472_01 | At1g65480     | flowering signals mediating protein FT; protein id: A                    | -3.619    | -3.627    | -2.967   | -4.124 |
| A019474_01 | At1g55560     | pectinesterase (pectin methylesterase) family; prote                     | -0.874    | -0.776    | -1.506   | -1.456 |
| A019475_01 | At3g19960     | myosin; protein id: At3g19960.1                                          | 0.21      | -0.181    | -0.044   | -0.321 |
| A019480_01 | At3g57490     | 40S ribosomal protein S2 homolog; protein id: At3g57490.1                | 0.877     | 0.883     | 0.96     | 1.341  |
| A019485_01 | At3g46970     | starch phosphorylase, putative; protein id: At3g46970.1                  | 0.915     | 0.863     | 0.499    | 0.803  |
| A019491_01 | At3g59970     | methylenetetrahydrofolate reductase MTHFR1; prot                         | 1.156     | 1.015     | 0.869    | 1.492  |
| A019493_01 | At3g54020     | putative protein; protein id: At3g54020.1                                | -0.094 NA | NA        |          | 0.26   |
| A019495_01 | At4g37270     | Cu2+-transporting ATPase-like protein; protein id: A                     | -0.073 NA |           | -0.564   | -0.383 |
| A019496_01 | At1g09210     | putative calcium-binding protein, calreticulin; proteir                  | 1.228     | 1.11      | 1.045    | 1.29   |



|            |           |                                                         |        |        |    |        |        |
|------------|-----------|---------------------------------------------------------|--------|--------|----|--------|--------|
| A019497_01 | At3g15350 | N-acetylglucosaminyltransferase family (Core-2/I-Br     | -0.347 | -0.315 | NA |        | 0.037  |
| A019500_01 | At4g32210 | putative protein; protein id: At4g32210.1               | -0.307 | NA     |    | 0.222  | -0.352 |
| A019502_01 | At2g26250 | beta-ketoacyl-CoA synthase (FIDDLEHEAD); protei         | 0.163  | 0.081  |    | 0.022  | -0.04  |
| A019505_01 | At4g28440 | putative protein; protein id: At4g28440.1               | 0.313  | 0.382  |    | 0.458  | 0.463  |
| A019510_01 | At4g19640 | GTP-binding protein, putative; protein id: At4g19640    | -0.881 | -1.028 |    | -0.569 | -0.462 |
| A019513_01 | At4g32250 | putative protein; protein id: At4g32250.1               | -0.776 | -0.976 |    | -0.217 | -0.383 |
| A019514_01 | At4g32240 | putative protein; protein id: At4g32240.1               | -0.037 | 0.226  |    | 0.277  | -0.175 |
| A019515_01 | At4g17840 | expressed protein; protein id: At4g17840.1              | -1.852 | -2.024 |    | -0.917 | -1.682 |
| A019517_01 | At4g18030 | putative protein; protein id: At4g18030.1               | 0.919  | 0.571  |    | 0.46   | 0.782  |
| A019520_01 | At4g21900 | putative protein; protein id: At4g21900.1               | -0.862 | -0.483 | NA |        | NA     |
| A019521_01 | At4g21190 | putative protein; protein id: At4g21190.1               | 0.398  | 0.093  |    | -0.082 | -0.13  |
| A019524_01 | At4g34990 | myb family transcription factor; protein id: At4g3499   | -0.018 | -0.011 |    | 0.71   | 1.027  |
| A019525_01 | At4g35040 | bZIP protein; protein id: At4g35040.1                   | -0.164 | -0.27  | NA |        | -0.002 |
| A019526_01 | At4g35110 | putative protein; protein id: At4g35110.1               | NA     | NA     |    | -1.18  | -1.724 |
| A019531_01 | At4g34710 | arginine decarboxylase SPE2; protein id: At4g34710      | NA     | NA     |    | 0.083  | 0.374  |
| A019532_01 | At4g19690 | Fe(II) transport protein; protein id: At4g19690.1       | 1.034  | -0.391 |    | 1.185  | 1.41   |
| A019537_01 | At4g33780 | putative protein; protein id: At4g33780.2               | -0.148 | -0.301 | NA |        | -0.285 |
| A019538_01 | At4g33790 | male sterility 2-like protein; protein id: At4g33790.1  | 0.878  | 0.764  |    | 1.498  | 2.254  |
| A019543_01 | At4g23600 | tyrosine transaminase like protein; protein id: At4g2   | 0.5    | 0.425  |    | -0.441 | -0.558 |
| A019544_01 | At4g25170 | putative protein; protein id: At4g25170.1               | -1.625 | -1.769 |    | -0.747 | -1.044 |
| A019556_01 | At4g37760 | squalene epoxidase-like protein; protein id: At4g377    | -0.495 | NA     |    | -0.695 | -0.682 |
| A019557_01 | At4g37830 | putative protein; protein id: At4g37830.1               | -0.253 | -0.076 |    | 0.216  | 0.126  |
| A019559_01 | At4g26270 | pyrophosphate-dependent phosphofructo-1-kinase          | 0.106  | 0.294  | NA |        | 0.085  |
| A019560_01 | At4g26060 | putative protein; protein id: At4g26060.1               | -1.548 | NA     |    | NA     | NA     |
| A019562_01 | At4g31840 | putative protein; protein id: At4g31840.1               | 1.817  | 1.697  |    | 1.215  | 1.923  |
| A019566_01 | At4g12600 | ribosomal protein L7Ae -like; protein id: At4g12600.    | 1.156  | 1.227  |    | 1.15   | 1.249  |
| A019568_01 | At4g32560 | putative protein; protein id: At4g32560.1               | -0.139 | 0.001  |    | 0.051  | 0.189  |
| A019571_01 | At4g26640 | WRKY family transcription factor; protein id: At4g26    | -0.153 | -0.336 |    | -0.241 | 0.132  |
| A019572_01 | At4g23850 | acyl-CoA synthetase - like protein; protein id: At4g2   | -0.254 | -0.642 |    | -0.997 | -0.919 |
| A019573_01 | At4g23920 | UDPglucose 4-epimerase - like protein; protein id: A    | -0.401 | NA     | NA |        | NA     |
| A019575_01 | At4g29080 | putative phytochrome-associated protein 2; protein      | -0.868 | -0.806 |    | -0.182 | -0.094 |
| A019576_01 | At4g29100 | putative protein; protein id: At4g29100.1               | -1.055 | NA     |    | -0.625 | -1.08  |
| A019578_01 | At4g20860 | FAD-linked oxidoreductase family; protein id: At4g2     | NA     | NA     | NA |        | NA     |
| A019579_01 | At4g01210 | hypothetical protein; protein id: At4g01210.1           | 0.385  | NA     |    | -0.135 | -0.409 |
| A019580_01 | At4g01410 | synaptobrevin VAMP713; protein id: At4g01410.1          | 0.225  | 0.37   |    | 0.581  | 0.629  |
| A019582_01 | At4g03600 | expressed protein; protein id: At4g03600.1              | NA     | NA     | NA |        | NA     |
| A019583_01 | At4g04210 | putative membrane trafficking factor; protein id: At4   | -0.46  | -0.764 |    | -0.074 | -0.493 |
| A019584_01 | At4g05020 | coded for by A. thaliana cDNA W43435; protein id: .     | -0.626 | -0.379 |    | 0.128  | 0.431  |
| A019585_01 | At4g05390 | ferredoxin--NADP+ reductase - like protein; protein i   | 0.35   | 0.005  |    | 0.148  | 0.24   |
| A019587_01 | At4g09030 | arabinogalactan-protein (AGP10); protein id: At4g09     | -1.135 | -0.678 |    | -0.106 | -0.498 |
| A019589_01 | At4g15415 | expressed protein; protein id: At4g15415.1              | -0.117 | -0.228 |    | 0.217  | 0.441  |
| A019590_01 | At4g15420 | UFD1 like protein; protein id: At4g15420.1              | -0.129 | -0.346 |    | -0.109 | -0.013 |
| A019591_01 | At4g15440 | hydroperoxide lyase (HPOL) like protein; protein id:    | 0.406  | 0.334  |    | 0.527  | 0.581  |
| A019592_01 | At4g16070 | hypothetical protein; protein id: At4g16070.1           | -0.661 | -0.524 | NA |        | -0.275 |
| A019597_01 | At4g29260 | acid phosphatase-like protein; protein id: At4g29260    | 0.234  | 0.324  |    | 0.233  | 0.243  |
| A019602_01 | At5g01620 | putative protein; protein id: At5g01620.1               | 0.872  | 0.945  |    | 0.898  | 1.697  |
| A019604_01 | At3g60600 | putative protein; protein id: At3g60600.1               | -0.452 | -0.385 |    | -0.007 | -0.108 |
| A019606_01 | At3g60640 | AtAPG8g; putative protein; protein id: At3g60640.1      | -0.853 | -0.695 |    | 0.103  | -0.373 |
| A019608_01 | At3g45970 | putative protein; protein id: At3g45970.1               | -1.061 | -1.117 |    | -0.496 | -0.1   |
| A019609_01 | At5g03630 | monodehydroascorbate reductase, putative; protein       | -0.064 | NA     |    | 0.288  | 0.566  |
| A019611_01 | At5g02230 | putative protein; protein id: At5g02230.1               | -1.406 | -1.443 |    | -0.253 | -0.505 |
| A019612_01 | At3g62580 | putative membrane protein; protein id: At3g62580.1      | -0.062 | -0.144 |    | 0.084  | -0.161 |
| A019614_01 | xxxx      | b/t At5g03400.1 putative protein and At5g03410.1D       | 0.215  | 0.106  |    | 0.184  | 0.285  |
| A019615_01 | At5g04510 | 3-phosphoinositide-dependent protein kinase-1 PDk       | 0.574  | 0.448  | NA |        | 0.662  |
| A019617_01 | At5g04770 | amino acid transport - like protein; protein id: At5g0  | -0.903 | -0.834 |    | -0.231 | -0.908 |
| A019618_01 | At5g03030 | DnaJ protein - like; protein id: At5g03030.1            | 0.111  | NA     |    | 0.22   | -0.054 |
| A019619_01 | At3g56150 | probable eukaryotic translation initiation factor 3 sut | -0.074 | -0.119 |    | 0.076  | 0.272  |
| A019621_01 | At5g12840 | CCAAT box binding factor/ transcription factor Hap2     | -0.353 | NA     | NA |        | -0.44  |
| A019625_01 | At1g04120 | ABC transporter family protein; protein id: At1g0412    | 0.264  | -0.13  |    | 0.345  | 0.287  |
| A019626_01 | At3g51820 | chlorophyll synthetase; protein id: At3g51820.1         | 0.177  | 0.046  |    | -0.06  | 0.183  |
| A019630_01 | At3g16780 | putative ribosomal protein; protein id: At3g16780.1     | 1.173  | 1.01   |    | 0.92   | 0.552  |
| A019632_01 | At3g24315 | expressed protein; protein id: At3g24315.1              | 0.305  | 0.166  |    | 0.204  | 0.395  |
| A019633_01 | At3g22850 | unknown protein; protein id: At3g22850.1                | 0.695  | 0.786  | NA |        | 1.126  |
| A019635_01 | At3g22320 | RNA polymerase I, II and III 24.3 kDa subunit; prote    | 0.249  | -0.082 |    | 0.189  | 0.354  |
| A019636_01 | xxxx      | b/t protein phosphatase 2A regulatory subunit isofor    | -1.413 | -0.857 |    | -1.007 | -0.205 |
| A019638_01 | At3g25220 | immunophilin (FKBP15-1); protein id: At3g25220.1        | 1.041  | 0.867  |    | 0.805  | 0.79   |
| A019640_01 | At5g41060 | putative protein; protein id: At5g41060.1               | 1.324  | 1.252  |    | 1.001  | 1.542  |
| A019641_01 | At3g28900 | 60S ribosomal protein L34, putative; protein id: At3g   | 1.175  | 0.952  |    | 0.848  | 0.773  |

|            |           |                                                           |        |    |        |        |        |
|------------|-----------|-----------------------------------------------------------|--------|----|--------|--------|--------|
| A019642_01 | At5g48880 | 3-keto-acyl-CoA thiolase 2 (gb AAC17877.1); protei        | 1.375  | NA |        | 0.81   | 1.286  |
| A019645_01 | At5g50430 | ubiquitin conjugating enzyme-like protein; protein id     | -0.265 |    | -0.261 | 0.005  | -0.08  |
| A019649_01 | At5g43970 | putative protein; protein id: At5g43970.1                 | 0.676  |    | 1.008  | 0.798  | 0.544  |
| A019650_01 | At5g55180 | glycosyl hydrolase family 17; protein id: At5g55180.      | 0.764  |    | 1.051  | 0.063  | -0.183 |
| A019654_01 | At5g67600 | expressed protein; protein id: At5g67600.1                | -0.731 |    | -0.61  | 0.194  | -0.372 |
| A019655_01 | At5g53570 | GTPase activator protein of Rab-like small GTPase         | -0.338 | NA |        | NA     | -0.1   |
| A019659_01 | At5g51640 | putative protein; protein id: At5g51640.1                 | -0.962 |    | -0.926 | NA     | -0.832 |
| A019662_01 | At5g47680 | putative protein; protein id: At5g47680.1                 | 0.788  |    | 0.715  | 0.45   | 0.332  |
| A019663_01 | At3g23570 | expressed protein; protein id: At3g23570.1                | -1.388 | NA |        | -1.012 | -1.646 |
| A019666_01 | At3g21190 | expressed protein; protein id: At3g21190.1                | 0.876  |    | 0.453  | 0.434  | 0.833  |
| A019668_01 | At3g19030 | expressed protein; protein id: At3g19030.1                | -2.374 |    | -2.214 | -1.381 | -2.849 |
| A019672_01 | At5g04940 | SET-domain protein-like; protein id: At5g04940.1          | 0.444  |    | 0.502  | 0.109  | 1.15   |
| A019674_01 | At5g61060 | histone deacetylase-like protein                          | -0.035 |    | -0.301 | -0.191 | 0.063  |
| A019675_01 | At5g61840 | putative protein; protein id: At5g61840.1                 | 0.298  |    | 0.158  | 0.047  | 0.008  |
| A019677_01 | At5g49230 | drought-induced protein Di19-like protein; protein id     | -0.216 |    | 0.022  | NA     | 0.312  |
| A019678_01 | At5g43580 | unknown protein; protein id: At5g43580.1                  | NA     | NA |        | NA     | NA     |
| A019679_01 | At5g43600 | N-carbamyl-L-amino acid amidohydrolase-like prote         | 0.079  |    | -0.415 | -0.369 | -0.341 |
| A019680_01 | At5g24420 | 6-phosphogluconolactonase-like protein; protein id:       | 1.893  |    | 1.469  | 1.056  | 1.774  |
| A019681_01 | At5g61450 | putative protein; protein id: At5g61450.1                 | -0.27  |    | -0.439 | 0      | 0.365  |
| A019683_01 | At5g52960 | putative protein; protein id: At5g52960.1                 | 0.4    |    | 0.535  | 0.259  | -0.292 |
| A019684_01 | At5g52970 | thylakoid lumen 15.0-kDa protein; protein id: At5g52      | 0.511  |    | 0.679  | -0.012 | -0.319 |
| A019686_01 | At5g53030 | putative protein; protein id: At5g53030.1                 | -1.835 | NA |        | -0.914 | NA     |
| A019691_01 | At5g38630 | cytochrome b-561 (gb AAD45585.1); protein id: At5         | 0.043  | NA |        | 0.059  | 0.201  |
| A019692_01 | At5g63580 | flavonol synthase; protein id: At5g63580.1                | -3.142 | NA |        | NA     | NA     |
| A019695_01 | At5g63640 | putative protein; protein id: At5g63640.1                 | -0.526 |    | -0.732 | -0.786 | -0.476 |
| A019698_01 | At5g63790 | putative protein; protein id: At5g63790.1                 | -2.665 |    | -2.6   | -1.474 | -1.785 |
| A019699_01 | At5g44090 | protein phosphatase 2A 62 kDa B regulatory subuni         | -0.552 |    | -0.535 | NA     | -0.712 |
| A019707_01 | At5g22850 | protease-like protein; protein id: At5g22850.1            | -0.248 | NA |        | NA     | -0.139 |
| A019710_01 | At5g23900 | 60S ribosomal protein L13; protein id: At5g23900.1        | 0.51   |    | 0.664  | 0.819  | 1.122  |
| A019712_01 | At5g08520 | putative protein; protein id: At5g08520.1                 | -0.391 |    | -0.126 | -0.294 | -0.528 |
| A019713_01 | At5g08530 | NADH dehydrogenase; protein id: At5g08530.1               | 0.296  |    | 0.2    | -0.307 | -0.054 |
| A019714_01 | At5g08540 | putative protein; protein id: At5g08540.1                 | 0.41   |    | 0.41   | 0.235  | 0.311  |
| A019718_01 | At5g53880 | expressed protein; protein id: At5g53880.1                | 0.678  |    | 0.371  | 0.71   | 0.563  |
| A019719_01 | At5g53940 | zinc-binding protein-like; protein id: At5g53940.1        | 0.179  |    | 0.236  | 0.093  | -0.317 |
| A019724_01 | At5g44580 | expressed protein; protein id: At5g44580.1                | -2.563 |    | -2.696 | -1.157 | -2.019 |
| A019725_01 | At5g54510 | auxin-responsive-like protein; protein id: At5g54510      | -0.792 |    | -0.686 | NA     | -0.398 |
| A019726_01 | At5g43760 | beta-ketoacyl-CoA synthase; protein id: At5g43760.        | -0.099 | NA |        | NA     | -0.228 |
| A019730_01 | At5g54280 | myosin heavy chain; protein id: At5g54280.1               | -0.302 |    | -0.14  | NA     | 0.505  |
| A019732_01 | At5g56630 | pyrophosphate-dependent phosphofructo-1-kinase-I          | 0.587  |    | 0.748  | 0.235  | 0.913  |
| A019733_01 | At5g65270 | GTP-binding protein, putative; protein id: At5g65270      | 0.49   |    | 0.422  | 0.597  | 0.857  |
| A019734_01 | At5g62470 | MYB96 transcription factor-like protein; protein id: A NA | NA     | NA |        | NA     | 0.196  |
| A019738_01 | At5g57330 | apospory-associated protein C; protein id: At5g57330      | 0.337  |    | 0.199  | 0.359  | 0.351  |
| A019741_01 | At5g01240 | LAX1 / AUX1 -like permease; protein id: At5g01240         | 0.556  |    | 0.797  | 0.754  | 1.311  |
| A019744_01 | At5g15050 | N-acetylglucosaminyltransferase family (Core-2/I-Br       | 0.496  |    | 0.458  | 0.389  | 0.832  |
| A019745_01 | At5g13170 | senescence-associated protein (SAG29); protein id:        | -0.167 | NA |        | 0.659  | 1.173  |
| A019748_01 | At1g70370 | aromatic rich glycoprotein, putative; protein id: At1g    | 1.535  |    | 1.445  | 1.003  | 1.468  |
| A019749_01 | At1g05180 | RUB-activating enzyme AXR1; protein id: At1g0518          | 0.032  |    | 0.22   | 0.203  | 0.463  |
| A019750_01 | At1g09660 | KH domain quaking protein, putative; protein id: At1      | 0.599  |    | 0.472  | 0.681  | 0.397  |
| A019751_01 | At1g70160 | expressed protein; protein id: At1g70160.1                | -0.929 |    | -1.103 | -0.604 | -0.227 |
| A019754_01 | At1g16010 | expressed protein; protein id: At1g16010.1                | -0.494 |    | -0.582 | -0.178 | -0.367 |
| A019755_01 | At3g02380 | zinc finger protein CONSTANS-LIKE 2 (COL2); prot          | -2.02  |    | -1.543 | NA     | NA     |
| A019756_01 | At4g16765 | similar to gibberellin oxidase-like protein; protein id:  | -0.719 |    | -0.305 | -0.256 | 0.28   |
| A019758_01 | At4g13770 | cytochrome p450 family; protein id: At4g13770.1           | -3.514 |    | -3.451 | -1.853 | -3.625 |
| A019761_01 | At1g04680 | putative pectate lyase A11; protein id: At1g04680.1       | 1.132  |    | 1.032  | 0.575  | 0.749  |
| A019763_01 | At2g34770 | fatty acid hydroxylase (FAH1); protein id: At2g34770      | -0.406 | NA |        | -0.441 | -0.704 |
| A019766_01 | At5g27430 | signal peptidase; protein id: At5g27430.1                 | 0.699  |    | 0.563  | 0.277  | 0.77   |
| A019768_01 | At1g70320 | ubiquitin-protein ligase 2 (UPL2), putative; protein ic   | -0.181 |    | -0.619 | -0.441 | -0.301 |
| A019771_01 | At2g22670 | auxin-regulated protein (IAA8); protein id: At2g2267      | 1.025  |    | 0.907  | 0.529  | 1.333  |
| A019774_01 | At2g43430 | glyoxalase II (hydroxyacylglutathione hydrolase)(GL       | -0.44  |    | -0.641 | -0.256 | -0.136 |
| A019779_01 | At2g23290 | myb family transcription factor; protein id: At2g2329     | 0.4    | NA |        | 0.639  | NA     |
| A019781_01 | At2g46830 | myb-related transcription factor (CCA1); protein id: ,    | -1.529 | NA |        | -0.798 | -1.365 |
| A019783_01 | At1g68370 | ARG1 protein (Altered Response to Gravity); proteir       | 0.001  |    | -0.215 | 0.126  | 0.444  |
| A019785_01 | At1g13210 | potential phospholipid-transporting ATPase 11; prot       | -1.116 | NA |        | NA     | NA     |
| A019791_01 | At1g09560 | germin-like protein; protein id: At1g09560.1              | -0.444 |    | -0.499 | -0.373 | -1.287 |
| A019793_01 | At2g29960 | cyclophilin; protein id: At2g29960.1                      | 0.482  |    | 0.416  | 0.49   | 0.289  |
| A019794_01 | At1g34210 | somatic embryogenesis receptor-like kinase, putativ       | -0.417 | NA |        | -0.351 | -0.563 |
| A019796_01 | At1g47420 | expressed protein; protein id: At1g47420.1                | 0.343  |    | 0.273  | 0.321  | 0.35   |
| A019797_01 | At1g70940 | PIN3. auxin transport protein REH1, putative; protei      | -0.229 | NA |        | NA     | 0.45   |

|            |           |                                                                               |           |           |           |        |
|------------|-----------|-------------------------------------------------------------------------------|-----------|-----------|-----------|--------|
| A019799_01 | At1g75020 | putative acyl-CoA:1-acylglycerol-3-phosphate acyltr NA                        | NA        |           | -0.711    | -0.78  |
| A019801_01 | At1g73060 | expressed protein; protein id: At1g73060.1                                    | 0.078     | 0.178     | -0.298    | -0.347 |
| A019805_01 | At1g80780 | CCR4-associated factor, putative\0CCR4-associate                              | -0.243    | -0.314    | 0.057     | 0.113  |
| A019806_01 | At1g54320 | membrane protein common family; protein id: At1g5                             | -0.391    | -0.345    | -0.254    | -0.227 |
| A019810_01 | At1g18720 | expressed protein; protein id: At1g18720.1                                    | -0.747    | -0.755    | -0.081    | -1.096 |
| A019812_01 | At3g51860 | Ca <sup>2+</sup> /H <sup>+</sup> -exchanging protein-like; protein id: At3g51 | -2.695    | -2.668    | -1.674    | -2.293 |
| A019813_01 | At1g33040 | expressed protein; protein id: At1g33040.1                                    | 0.978     | 0.844     | 1.113     | 1.091  |
| A019815_01 | At1g04780 | hypothetical protein; protein id: At1g04780.1                                 | -0.528    | -0.964    | -0.485    | -0.614 |
| A019818_01 | At1g14280 | phytochrome kinase substrate 1, putative; protein id                          | -0.364    | -0.155    | 0.392     | 0.284  |
| A019820_01 | At2g33450 | putative chloroplast 50S ribosomal protein L28; prot                          | 0.701     | 0.71      | 0.441     | 0.075  |
| A019822_01 | At2g26600 | glycosyl hydrolase family 17; protein id: At2g26600.                          | -0.912    | -1.049    | -0.309    | -0.177 |
| A019823_01 | At2g38130 | putative acetyltransferase; protein id: At2g38130.1                           | -0.192    | 0.044     | 0.319     | 0.204  |
| A019826_01 | At2g47070 | putative squamosa-promoter binding protein; protei                            | -0.167    | -0.222    | -0.059    | 0.103  |
| A019828_01 | At2g29390 | putative C-4 sterol methyl oxidase; protein id: At2g2                         | 0.427     | 0.459     | 0.744     | 1.245  |
| A019829_01 | At2g45740 | expressed protein; protein id: At2g45740.1                                    | -0.802    | -0.796    | -0.67     | -0.481 |
| A019830_01 | At2g45850 | putative AT-hook DNA-binding protein; protein id: A                           | -0.118    | -0.188 NA |           | -0.224 |
| A019831_01 | At2g45910 | putative protein kinase; protein id: At2g45910.1                              | -1.056    | -0.951 NA | NA        |        |
| A019834_01 | At2g35120 | glycine decarboxylase complex H-protein; protein id                           | 0.639     | 0.565     | 0.745     | 0.305  |
| A019840_01 | At2g32520 | putative carboxymethylenebutenolidase; protein id:                            | 0.356     | 0.512     | 0.341     | 0.52   |
| A019842_01 | At2g32600 | spliceosome associated protein-family; protein id: A                          | -0.377 NA |           | 0.152     | -0.426 |
| A019843_01 | At2g38310 | expressed protein; protein id: At2g38310.1                                    | 0.974     | 0.941     | 0.244     | 0.74   |
| A019846_01 | At2g38440 | unknown protein; protein id: At2g38440.1                                      | -0.02     | -0.113    | 0.027     | 0.775  |
| A019848_01 | At2g37570 | expressed protein; protein id: At2g37570.1                                    | -0.551    | -0.75     | -0.608    | -0.591 |
| A019851_01 | At2g37710 | putative receptor-like protein kinase; protein id: At2g                       | -0.444    | -0.269 NA |           | -0.077 |
| A019854_01 | At2g26910 | ABC transporter family protein; protein id: At2g2691                          | 0.039     | 0.19      | 0.282     | 0.986  |
| A019855_01 | At2g19800 | expressed protein; protein id: At2g19800.1                                    | -0.003    | -0.119    | -0.065    | -0.055 |
| A019857_01 | At2g18740 | putative small nuclear ribonucleoprotein E; protein i                         | 0.699     | 0.467     | 0.657     | 0.126  |
| A019858_01 | At2g39010 | putative aquaporin (water channel protein); protein i                         | 0.601     | 0.888     | 0.344     | 0.476  |
| A019861_01 | At2g37470 | putative histone H2B; protein id: At2g37470.1                                 | 0.668     | 0.676     | 0.567     | 0.694  |
| A019865_01 | At2g22360 | putative DnaJ protein; protein id: At2g22360.1                                | -0.323    | -0.337 NA |           | -0.702 |
| A019866_01 | At2g37020 | translin-like protein; protein id: At2g37020.1                                | 0.88      | 1.261     | 1.033     | 1.476  |
| A019870_01 | At2g13560 | malate oxidoreductase (malic enzyme), putative; pro                           | 0.196     | -0.029    | 0.006     | 0.08   |
| A019872_01 | At2g01820 | putative receptor-like protein kinase; protein id: At2g                       | 0.539     | 0.286     | 0.363     | 0.493  |
| A019874_01 | At2g01890 | putative purple acid phosphatase; protein id: At2g01                          | -4.091 NA |           | -2.454 NA |        |
| A019876_01 | At2g25280 | expressed protein; protein id: At2g25280.1                                    | -0.008    | -0.308    | -0.128    | 0.085  |
| A019877_01 | At2g25310 | unknown protein; protein id: At2g25310.1                                      | 0.078     | 0.256     | 0.287     | -0.012 |
| A019880_01 | At2g42600 | phosphoenolpyruvate carboxylase; protein id: At2g4                            | -0.856    | -0.738    | -0.293    | -0.376 |
| A019882_01 | At2g20490 | expressed protein; protein id: At2g20490.1                                    | 0.731     | 0.958     | 1.066     | 0.53   |
| A019885_01 | At2g21580 | 40S ribosomal protein S25; protein id: At2g21580.1                            | 0.65      | 0.61      | 0.779     | 1.145  |
| A019886_01 | At2g21640 | unknown protein; protein id: At2g21640.1                                      | NA        | -0.176    | -0.195    | -0.702 |
| A019887_01 | At2g36160 | 40S ribosomal protein S14; protein id: At2g36160.1                            | 0.817     | 0.598     | 0.748     | 0.952  |
| A019891_01 | At1g15500 | adenine nucleotide translocase, putative; protein id:                         | 0.603 NA  |           | 0.283     | 0.586  |
| A019892_01 | At1g78290 | serine-threonine protein kinase, putative; protein id:                        | -2.852    | -3.031    | -1.504    | -2.369 |
| A019893_01 | At1g64780 | ammonium transporter, putative; protein id: At1g64                            | -2.727 NA |           | -1.279    | -2.028 |
| A019894_01 | At2g25850 | putative poly(A) polymerase; protein id: At2g25850.                           | -0.338    | -0.069    | -0.671    | 0.027  |
| A019895_01 | At1g44800 | nodulin protein, putative; protein id: At1g44800.1                            | -2.012    | -2.139    | -0.064    | 0.155  |
| A019897_01 | At1g06290 | acyl-CoA oxidase, putative; protein id: At1g06290.1                           | -0.337 NA | NA        |           | 0.496  |
| A019898_01 | At1g18260 | expressed protein; protein id: At1g18260.1                                    | -0.341    | -0.116    | -0.221    | -0.044 |
| A019899_01 | At1g10590 | expressed protein; protein id: At1g10590.1                                    | 0.202     | 0.216     | 0.209     | -0.078 |
| A019900_01 | At1g48090 | unknown protein; protein id: At1g48090.1                                      | -0.333    | -0.644    | -0.146    | -0.333 |
| A019901_01 | At1g12360 | expressed protein; protein id: At1g12360.1                                    | -0.086    | -0.595    | -0.592    | -0.669 |
| A019904_01 | At1g06190 | expressed protein; protein id: At1g06190.1                                    | 0.603     | 0.35      | 0.234     | 0.324  |
| A019905_01 | At1g06220 | elongation factor Tu family protein; protein id: At1g0                        | 0.183     | 0.246     | 0.471     | 0.808  |
| A019916_01 | At1g12430 | armadillo-repeat-containing kinesin-related protein;                          | -0.361    | -0.094    | 0.012     | -0.063 |
| A019918_01 | At1g57620 | integral membrane protein, putative; protein id: At1g                         | 0.881     | 0.69      | 0.858     | 0.878  |
| A019919_01 | At1g27030 | expressed protein; protein id: At1g27030.1                                    | 0.085     | 0.096     | 1.238     | 1.737  |
| A019923_01 | At1g63970 | expressed protein; protein id: At1g63970.2                                    | -0.061    | -0.314    | -0.077    | -0.521 |
| A019926_01 | At1g77920 | bZIP transcription factor, bZIP50; protein id: At1g77                         | -1.603 NA | NA        |           | -1.465 |
| A019927_01 | At1g10650 | S-ribonuclease binding protein SBP1, putative; prot                           | -0.159 NA | NA        |           | 0.542  |
| A019929_01 | At1g76120 | expressed protein; protein id: At1g76120.1                                    | 0.281     | 0.076     | 0.225     | 0.884  |
| A019934_01 | At3g16950 | dihydrolipoamide dehydrogenase, putative; protein i                           | 0.403     | 0.535     | 0.343     | 0.669  |
| A019935_01 | At3g59990 | putative protein; protein id: At3g59990.1                                     | -0.236    | -0.363    | 0.1       | 0.623  |
| A019936_01 | At5g27770 | 60S ribosomal protein L22 - like; protein id: At5g277                         | 0.578     | 0.541     | 0.448     | 0.508  |
| A019940_01 | At1g06430 | FtsH protease, putative; protein id: At1g06430.1                              | -1.883    | -1.635    | -0.996    | -1.256 |
| A019941_01 | At1g60010 | expressed protein; protein id: At1g60010.1                                    | -0.763    | -0.995    | -0.39     | -0.461 |
| A019942_01 | At1g07090 | expressed protein; protein id: At1g07090.1                                    | -0.278    | -0.009    | 0.505     | 0.419  |
| A019943_01 | At1g68100 | expressed protein; protein id: At1g68100.1                                    | 0.922 NA  |           | 0.269     | -0.17  |
| A019944_01 | At1g51070 | bHLH protein; protein id: At1g51070.1                                         | 0.152 NA  |           | 0.52      | 0.755  |

|            |           |                                                                          |           |           |        |        |
|------------|-----------|--------------------------------------------------------------------------|-----------|-----------|--------|--------|
| A019946_01 | At1g50920 | GTP-binding protein, putative; protein id: At1g50920                     | 0.41      | 0.193     | 0.236  | 0.416  |
| A019947_01 | At3g12370 | 50S ribosomal protein L10, putative; protein id: At3g12370               | 0.442     | 0.359     | 0.446  | 0.395  |
| A019949_01 | At1g42470 | Niemann-Pick C disease protein-like protein; protein id: At1g42470       | -0.126    | 0.291     | -0.488 | -0.338 |
| A019952_01 | At1g55210 | disease resistance response protein-related/ dirigens                    | 0.799     | 0.754     | 0.763  | 0.59   |
| A019953_01 | At1g77690 | putative AUX1-like permease; protein id: At1g77690                       | -0.731    | 0.42      | -0.187 | 0.182  |
| A019954_01 | At1g71040 | spore coat protein-like protein; protein id: At1g71040                   | -1.513    | -1.831    | -1.023 | -1.883 |
| A019957_01 | At1g68820 | expressed protein; protein id: At1g68820.1                               | -0.767    | -0.726    | -0.141 | 0.371  |
| A019958_01 | At1g29970 | 60S ribosomal protein L18A, putative; protein id: At1g29970              | -0.779    | -1.038    | -0.263 | -1.232 |
| A019964_01 | At1g74660 | expressed protein; protein id: At1g74660.1                               | -1.555    | -1.375    | -0.454 | -1.35  |
| A019965_01 | At1g74270 | putative ribosomal protein; protein id: At1g74270.1                      | 0.618     | 0.795     | 0.611  | 0.096  |
| A019968_01 | At1g74040 | putative 2-isopropylmalate synthase; protein id: At1g74040               | 0.675     | 0.596     | -0.035 | 0.295  |
| A019969_01 | At1g72340 | putative translation initiation factor EIF-2B alpha subunit              | 0.225     | 0.211     | 0.187  | 0.165  |
| A019970_01 | At1g75170 | unknown protein; protein id: At1g75170.1                                 | 0.364     | 0.315     | 0.687  | 0.992  |
| A019971_01 | At3g01270 | putative pectate lyase; protein id: At3g01270.1                          | -0.851    | -0.666    | -1.693 | -1.224 |
| A019972_01 | At3g01150 | polypyrimidine tract-binding protein (PTB); protein id: At3g01150        | 0.076 NA  | NA        |        | -0.04  |
| A019973_01 | At3g01130 | expressed protein; protein id: At3g01130.1                               | 0.698     | 0.437     | 0.339  | 0.153  |
| A019975_01 | At3g01060 | unknown protein; protein id: At3g01060.1                                 | -0.912    | -0.797    | -0.403 | -0.184 |
| A019976_01 | At3g03780 | putative methionine synthase; protein id: At3g03780                      | -1.651    | -1.916    | -1.067 | -0.981 |
| A019977_01 | At3g07370 | expressed protein; protein id: At3g07370.1                               | -0.463    | -0.517    | -0.44  | -0.616 |
| A019978_01 | At3g10370 | putative glycerol-3-phosphate dehydrogenase; protein id: At3g10370       | NA        | NA        | -0.716 | -0.139 |
| A019982_01 | At3g02600 | putative phosphatidate phosphohydrolase; protein id: At3g02600           | 0.468     | 0.425     | 0.403  | 0.72   |
| A019983_01 | At3g02700 | expressed protein; protein id: At3g02700.1                               | -0.131    | -0.067    | 0.008  | 0.074  |
| A019985_01 | At3g19800 | expressed protein; protein id: At3g19800.1                               | -1.064    | -1.4      | -0.751 | -1.075 |
| A019987_01 | At2g05590 | expressed protein; protein id: At2g05590.1                               | 0.523 NA  | NA        | NA     | NA     |
| A019991_01 | At1g73230 | putative transcription factor BTF3 (RNA polymerase III)                  | 1.116     | 0.735     | 0.903  | 0.802  |
| A019995_01 | At1g78070 | expressed protein; protein id: At1g78070.1                               | -0.489 NA | NA        | NA     | NA     |
| A019997_01 | At5g54900 | RNA binding protein 45 (RBP45), putative; protein id: At5g54900          | -1.638    | 0.334     | 0.613  | 0.67   |
| A020001_01 | At1g55490 | rubisco subunit binding-protein beta subunit; protein id: At1g55490      | 1.056     | 0.899     | 0.487  | 1.837  |
| A020005_01 | At2g17840 | putative senescence-associated protein 12; protein id: At2g17840         | -0.923    | -0.581    | -0.62  | -1.176 |
| A020008_01 | At2g39420 | putative phospholipase; protein id: At2g39420.1                          | -0.924    | -0.847    | -0.92  | -0.316 |
| A020009_01 | At5g07220 | putative protein; protein id: At5g07220.1                                | -1.72     | -1.934    | -0.793 | -1.088 |
| A020012_01 | At4g26590 | isp4 like protein; protein id: At4g26590.1                               | 1.092     | 1.058     | 1.077  | 1.549  |
| A020014_01 | At2g45470 | fasciclin-like arabinogalactan-protein (FLA8); protein id: At2g45470     | 1.354     | 1.238     | 0.742  | 0.98   |
| A020016_01 | At4g17460 | homeobox-leucine zipper protein HAT1 (HD-Zip protein)                    | 0.78      | 1.003     | 0.957  | 1.451  |
| A020017_01 | At5g09530 | surface protein PspC-related; protein id: At5g09530                      | -1.263    | -1.76 NA  | NA     | NA     |
| A020022_01 | At5g13750 | transporter-like protein                                                 | -1.688 NA |           | -0.637 | -0.602 |
| A020023_01 | At1g79590 | expressed protein; protein id: At1g79590.1                               | -0.424 NA |           | -0.079 | -0.458 |
| A020025_01 | At4g01370 | MAP kinase 4 (MPK4); protein id: At4g01370.1                             | 0.433     | 0.234     | 0.395  | 0.653  |
| A020031_01 | At3g53500 | splicing factor - like protein; protein id: At3g53500.1                  | 0.049     | -0.044    | 0.126  | 0.009  |
| A020033_01 | At3g21690 | integral membrane protein, putative; protein id: At3g21690               | -1.605    | -2.011    | -1.586 | -1.556 |
| A020035_01 | At5g06870 | putative polygalacturonase inhibiting protein                            | 0.524     | 0.628     | -0.653 | -0.573 |
| A020036_01 | At5g42220 | putative protein; protein id: At5g42220.1                                | 0.193 NA  | NA        |        | -0.626 |
| A020037_01 | At1g32550 | ferredoxin, putative; protein id: At1g32550.1                            | 0.648     | 0.676     | 0.473  | 0.271  |
| A020039_01 | xxxx      | b/t hypothetical protein; protein id: At3g02510.1 and                    | 1.128     | 1.29      | 0.775  | 1.063  |
| A020041_01 | At2g02960 | unknown protein; protein id: At2g02960.1                                 | -0.478 NA | NA        | NA     | NA     |
| A020042_01 | At1g13960 | WRKY family transcription factor; protein id: At1g13960                  | NA        | NA        | NA     | NA     |
| A020043_01 | At5g02040 | putative protein; protein id: At5g02040.1                                | -0.344 NA | NA        |        | -0.381 |
| A020045_01 | At3g26740 | light regulated protein, putative; protein id: At3g26740                 | -1.566    | -1.846    | -1.699 | -2.243 |
| A020046_01 | At3g48140 | B12D-like protein; protein id: At3g48140.1                               | -0.561    | -0.593    | -0.143 | -0.643 |
| A020047_01 | At2g42500 | protein phosphatase 2A (PP2A); protein id: At2g42500                     | 0.029     | -0.394    | 0.002  | 0.04   |
| A020048_01 | At2g19520 | putative WD-40 repeat protein, MS14; protein id: At2g19520               | 0.731     | 0.831     | 0.898  | 1.031  |
| A020050_01 | At3g53900 | uracil phosphoribosyltransferase-like protein; protein id: At3g53900     | 1.787     | 1.708     | 1.4    | 2.019  |
| A020053_01 | At3g14067 | subtilisin-like serine protease, putative; protein id: At3g14067         | -1.784    | -2.136    | -0.862 | -1.12  |
| A020054_01 | At3g56090 | putative protein; protein id: At3g56090.1                                | 0.665     | 0.59      | 0.933  | 0.961  |
| A020055_01 | At5g66052 | expressed protein; protein id: At5g66052.1                               | -0.638    | -0.805    | -0.584 | -0.46  |
| A020056_01 | At4g04470 | peroxisomal membrane protein PMP22; protein id: At4g04470                | -0.81     | -0.51     | -0.046 | -0.083 |
| A020060_01 | At5g21990 | hypothetical protein; protein id: At5g21990.1                            | -0.234    | -0.87     | -0.641 | -0.318 |
| A020061_01 | At3g24100 | unknown protein; protein id: At3g24100.1                                 | -0.76     | -0.36     | -0.401 | -1.141 |
| A020062_01 | At1g54290 | protein translation factor Sui1 homolog, putative; protein id: At1g54290 | -1.682    | -1.374    | -1.375 | -1.342 |
| A020064_01 | At4g24570 | mitochondrial carrier protein family; protein id: At4g24570              | -1.328 NA |           | -1.01  | -1.755 |
| A020065_01 | At5g62680 | peptide transporter; protein id: At5g62680.1                             | -1.568    | -1.698    | -1.311 | -2.024 |
| A020068_01 | At3g22600 | expressed protein; protein id: At3g22600.1                               | -1.312    | -0.574 NA | NA     | NA     |
| A020070_01 | At1g22740 | ras-related GTP-binding protein (Rab7); protein id: At1g22740            | -1.074    | -1.001    | -0.097 | -0.119 |
| A020071_01 | At1g22990 | copper chaperone (CCH)-related; protein id: At1g22990                    | 0.407     | 0.649     | 0.947  | 1.847  |
| A020072_01 | At1g01090 | pyruvate dehydrogenase E1 alpha subunit; protein id: At1g01090           | 0.39      | 0.273     | 0.208  | 0.661  |
| A020073_01 | At2g43970 | VirF-interacting protein FIP1; protein id: At2g43970                     | -0.34     | -0.656    | -0.429 | -0.993 |
| A020074_01 | At3g16500 | phytochrome-associated protein 1 (PAP1); protein id: At3g16500           | -0.004    | -0.118    | 0.052  | -0.08  |
| A020075_01 | At5g02530 | RNA and export factor binding protein, putative; protein id: At5g02530   | -0.216    | 0.053 NA  |        | -0.156 |

|            |           |                                                         |           |           |        |        |
|------------|-----------|---------------------------------------------------------|-----------|-----------|--------|--------|
| A020076_01 | At3g13450 | branched chain alpha-keto acid dehydrogenase E1         | -1.31     | -0.772    | -0.424 | -0.792 |
| A020077_01 | At5g47890 | NADH dehydrogenase 10.5K chain-like protein; prot       | 0.105     | 0.251     | 0.105  | 0.254  |
| A020078_01 | At3g22480 | prefoldin-like protein; protein id: At3g22480.1         | 0.194     | 0.484 NA  |        | 0.494  |
| A020082_01 | At1g78870 | E2, ubiquitin-conjugating enzyme, putative; protein i   | -0.756    | -0.776    | -0.243 | -0.544 |
| A020083_01 | At3g63530 | putative protein; protein id: At3g63530.1               | -0.382    | 0.04      | -0.357 | -0.862 |
| A020086_01 | At2g39460 | 60S ribosomal protein L23A; protein id: At2g39460.      | 0.802     | 0.716     | 0.747  | 0.833  |
| A020089_01 | At3g27570 | putative sucrose cleavage protein; protein id: At3g2    | -0.217    | -0.634    | -0.288 | -0.407 |
| A020090_01 | At3g59910 | putative protein; protein id: At3g59910.1               | -0.058 NA | NA        |        | 0.117  |
| A020091_01 | At1g17080 | expressed protein; protein id: At1g17080.1              | -0.669    | -0.395    | 0.041  | -0.536 |
| A020092_01 | At1g12270 | hypothetical protein; protein id: At1g12270.1           | 0.222     | 0.488     | 0.383  | 0.924  |
| A020098_01 | At2g01270 | expressed protein; protein id: At2g01270.1              | -0.234    | -0.426    | -0.427 | -0.164 |
| A020099_01 | At3g10850 | glyoxalase II (hydroxyacylglutathione hydrolase)(GL     | 0.054     | 0.479     | 0.349  | 0.189  |
| A020100_01 | At1g69960 | serine/threonine protein phosphatase type 2A (PP2,      | -0.231    | -0.204    | 0.15   | -0.03  |
| A020101_01 | At5g65670 | auxin-induced protein (IAA9) (pir [T05902]); protein i  | 0.678     | 0.411     | 0.459  | 0.674  |
| A020102_01 | At5g02840 | myb family transcription factor; protein id: At5g0284   | -0.876    | -1.093    | -0.79  | -0.54  |
| A020103_01 | At3g54600 | putative protein; protein id: At3g54600.1               | -1.001    | -1.18     | -0.76  | -0.906 |
| A020104_01 | At1g08200 | expressed protein; protein id: At1g08200.1              | 0.786     | 0.649     | 0.549  | 0.711  |
| A020105_01 | At5g04760 | l-box binding factor - like protein; protein id: At5g04 | -2.59     | -2.275    | -1.052 | -1.685 |
| A020107_01 | At5g43830 | putative aluminum-induced protein; protein id: At5g     | -0.043    | 0.021     | -0.008 | -0.17  |
| A020109_01 | At1g50290 | expressed protein; protein id: At1g50290.1              | -1.549    | -1.446    | -0.459 | -0.459 |
| A020116_01 | At5g12170 | putative protein; protein id: At5g12170.1               | -1.167    | -1.422    | -1.009 | -1.531 |
| A020119_01 | At5g20490 | myosin-like protein; protein id: At5g20490.1            | -0.49     | -0.942    | -0.442 | -0.611 |
| A020120_01 | At5g63840 | glycosyl hydrolase family 31; protein id: At5g63840.    | 0.808     | 0.645     | 0.355  | 0.718  |
| A020121_01 | At4g31450 | putative protein; protein id: At4g31450.1               | -1.151    | -1.375    | -0.733 | -1.329 |
| A020122_01 | At2g46820 | expressed protein; protein id: At2g46820.1              | -0.576    | -0.482    | -0.497 | -0.819 |
| A020123_01 | At2g33740 | putative related to microbial divalent cation toleranc  | -0.505 NA |           | -0.043 | -0.827 |
| A020125_01 | At2g39100 | putative RING zinc finger protein; protein id: At2g39   | -0.287    | 0.148     | -0.043 | -0.228 |
| A020126_01 | At5g59960 | putative protein; protein id: At5g59960.1               | -2.137    | -1.498    | -0.79  | -0.946 |
| A020128_01 | At3g53180 | nodulin / glutamate-ammonia ligase - like protein; pi   | 0.109     | 0.053     | -0.232 | 0.17   |
| A020130_01 | At5g22330 | Ruv DNA-helicase-like protein; protein id: At5g2233     | 0.311     | 0.288 NA  |        | 0.474  |
| A020132_01 | At3g58530 | putative protein; protein id: At3g58530.1               | -0.415    | -0.503    | -0.392 | -0.375 |
| A020134_01 | At5g41950 | putative protein; protein id: At5g41950.1               | 0.751     | 0.368     | 0.249  | 0.417  |
| A020135_01 | At3g06350 | dehydroquinase dehydratase/shikimate dehydrogen;        | -0.011    | -0.117 NA |        | 0.199  |
| A020140_01 | At3g19860 | bHLH protein; protein id: At3g19860.1                   | -0.105    | -0.436 NA |        | -0.089 |
| A020141_01 | At5g55030 | putative protein; protein id: At5g55030.1               | -0.132    | -0.149    | -0.149 | 0.076  |
| A020144_01 | At1g68440 | expressed protein; protein id: At1g68440.1              | -1.245    | -1.358    | -0.571 | -0.744 |
| A020145_01 | xxxx      | No hits found                                           | -1.38     | -1.456    | -0.642 | -0.803 |
| A020155_01 | At4g30760 | putative protein; protein id: At4g30760.1               | -0.569    | -0.232    | 0.167  | -0.109 |
| A020157_01 | At5g27600 | long-chain-fatty-acid--CoA ligase-like protein; protei  | -0.978    | -1.064    | -0.677 | -0.576 |
| A020160_01 | At1g33970 | expressed protein; protein id: At1g33970.1              | -1.186    | -1.176    | -1.141 | -1.947 |
| A020162_01 | At3g01120 | putative cystathionine gamma-synthase; protein id:      | -0.831    | -0.466    | -0.251 | 0.026  |
| A020164_01 | At5g09960 | putative protein; protein id: At5g09960.1               | -0.507 NA | NA        |        | -0.455 |
| A020166_01 | At3g15970 | expressed protein; protein id: At3g15970.1              | 0.185     | 0.273 NA  |        | 0.208  |
| A020167_01 | At1g55310 | arginine/serine-rich protein; protein id: At1g55310.1   | -0.952    | -0.375    | -0.119 | -0.205 |
| A020169_01 | At2g34470 | putative urease accessory protein; protein id: At2g3    | 0.04      | -0.055    | 0.316  | 0.435  |
| A020170_01 | At4g37430 | cytochrome p450 family; protein id: At4g37430.1         | -0.16     | 0         | 0.256  | 0.05   |
| A020171_01 | At3g02730 | thioredoxin f1; protein id: At3g02730.1                 | -0.579    | -0.304    | -0.591 | -0.656 |
| A020172_01 | At2g01450 | putative MAP kinase; protein id: At2g01450.1            | -1.118    | -1.121    | -0.837 | -0.823 |
| A020173_01 | At1g79870 | putative D-isomer specific 2-hydroxyacid dehydroge      | -0.317    | -0.169    | -0.166 | -0.398 |
| A020178_01 | At1g69040 | unknown protein; protein id: At1g69040.1                | 0.794     | 0.367     | 0.469  | 1.082  |
| A020179_01 | At5g66400 | dehydrin RAB18-like protein (sp P30185)                 | -1.257    | -0.586    | -0.512 | -1.003 |
| A020183_01 | At1g78090 | trehalose-6-phosphate phosphatase (AtTPPB); prot        | 0.435     | 0.611     | 0.869  | 0.633  |
| A020186_01 | At4g36220 | ferulate-5-hydroxylase (FAH1); protein id: At4g3622     | -1.432    | -1.177    | -0.865 | -0.644 |
| A020187_01 | At3g62020 | germin-like protein (GLP10); protein id: At3g62020.     | -1.923    | -1.627    | -0.996 | -1.25  |
| A020188_01 | At4g24770 | RNA-binding protein RNP-T precursor                     | 0.575     | 0.456     | 0.125  | -0.187 |
| A020189_01 | At3g16857 | ARR1 protein, putative; protein id: At3g16857.1         | -1.392    | -1.515    | -0.577 | -1.182 |
| A020190_01 | At3g61240 | DEAD/DEAH box RNA helicase, putative; protein id        | 0.146     | 0.123     | 0.349  | 0.681  |
| A020192_01 | At2g27150 | aldehyde oxidase; protein id: At2g27150.1               | -2.019    | -2.696    | -1.293 | -1.799 |
| A020195_01 | At4g15110 | cytochrome p450, putative; protein id: At4g15110.1      | 0.235     | 0.284     | 0.078  | 0.227  |
| A020196_01 | At5g56350 | pyruvate kinase; protein id: At5g56350.1                | -0.202    | -0.005    | 0.081  | 0.208  |
| A020197_01 | At4g01310 | putative L5 ribosomal protein; protein id: At4g01310    | 1.191     | 0.963     | 0.499  | 0.445  |
| A020198_01 | At5g35620 | eIF4Eiso protein (emb CAA71579.1); protein id: At5      | 0.666     | 0.476     | 0.155  | 0.021  |
| A020199_01 | At5g16650 | putative protein                                        | -0.527    | -0.398    | -0.655 | -0.58  |
| A020200_01 | At2g01320 | ABC transporter family protein; protein id: At2g0132    | -0.717    | -0.527    | -0.501 | -0.838 |
| A020203_01 | At1g26270 | expressed protein; protein id: At1g26270.1              | 0.048     | -0.153    | -0.361 | -0.46  |
| A020205_01 | At1g03675 | putative thioredoxin-m; protein id: At1g03675.1         | -0.406    | -0.372    | -0.25  | -0.546 |
| A020208_01 | At1g56200 | expressed protein; protein id: At1g56200.1              | -0.15     | -0.041    | -0.156 | -0.8   |
| A020210_01 | At1g31970 | DEAD/DEAH box RNA helicase, putative; protein id        | -0.104    | -0.112    | 0.27   | 0.444  |

|            |           |                                                       |        |        |        |        |
|------------|-----------|-------------------------------------------------------|--------|--------|--------|--------|
| A020211_01 | At5g54500 | 1,4-benzoquinone reductase-like protein               | -0.513 | -0.544 | -0.465 | -0.792 |
| A020213_01 | At1g79990 | putative coatomer protein complex, subunit beta 2 (   | 0.658  | 0.618  | 0.401  | 0.223  |
| A020214_01 | At3g47960 | putative peptide transporter; protein id: At3g47960.1 | -1.376 | -1.364 | -0.682 | -0.878 |
| A020215_01 | At1g32050 | secretory carrier membrane protein, putative; protei  | -0.069 | 0.063  | 0.026  | 0.094  |
| A020216_01 | At1g09630 | GTP-binding protein, putative; protein id: At1g09630  | 0.809  | 0.889  | 0.819  | 0.877  |
| A020217_01 | At2g28790 | putative thaumatin; protein id: At2g28790.1           | 1.569  | 1.121  | 0.635  | 1.417  |
| A020219_01 | At3g15410 | unknown protein; protein id: At3g15410.1              | 0.646  | NA     | NA     | 0.524  |
| A020221_01 | At3g10740 | glycosyl hydrolase family 51; protein id: At3g10740.  | -2.08  | -2.584 | -1.889 | -1.783 |
| A020222_01 | At1g49750 | unknown protein; protein id: At1g49750.1              | -0.17  | -0.16  | -0.244 | 0.153  |
| A020225_01 | At3g62550 | putative protein; protein id: At3g62550.1             | -2.386 | -2.505 | -1.547 | -3.035 |
| A020226_01 | At3g01400 | expressed protein; protein id: At3g01400.1            | -0.939 | -0.659 | -0.248 | -0.581 |
| A020228_01 | At5g01810 | serine/threonine protein kinase ATPK10; protein id:   | -0.255 | -0.261 | -0.263 | -0.443 |
| A020229_01 | At5g40850 | uroporphyrin III methylase (gb AAB92676.1); prote     | 0.338  | 0.533  | -0.046 | 0.206  |
| A020233_01 | At4g37470 | putative protein; protein id: At4g37470.1             | -1.225 | -1.417 | -0.179 | -0.451 |
| A020236_01 | At5g17650 | glycine/proline-rich protein; protein id: At5g17650.1 | NA     | NA     | NA     | NA     |
| A020241_01 | At5g61530 | auxin-regulated protein; protein id: At5g61530.1      | -0.778 | -0.818 | -0.543 | -0.519 |
| A020242_01 | At4g36850 | putative protein; protein id: At4g36850.1             | -0.985 | -0.903 | -1.634 | -1.552 |
| A020243_01 | At1g07230 | unknown protein; protein id: At1g07230.1              | -0.679 | -0.671 | -0.655 | -0.66  |
| A020245_01 | At1g15200 | expressed protein; protein id: At1g15200.1            | 0.502  | NA     | 0.03   | 0.162  |
| A020249_01 | At3g52220 | expressed protein; protein id: At3g52220.1            | -0.047 | -0.215 | 0.36   | 0.216  |
| A020250_01 | At1g16080 | expressed protein; protein id: At1g16080.1            | 0.506  | 0.401  | 0.015  | -0.098 |
| A020251_01 | At5g61900 | copine - like protein; protein id: At5g61900.1        | -0.034 | -0.067 | -0.093 | -0.167 |
| A020254_01 | At4g13780 | methionyl-tRNA synthetase - like protein; protein id: | 0.374  | 0.002  | -0.156 | -0.069 |
| A020256_01 | At3g01200 | unknown protein; protein id: At3g01200.1              | -0.482 | -0.7   | -0.385 | -0.258 |
| A020257_01 | At2g17710 | expressed protein; protein id: At2g17710.1            | -0.599 | -0.989 | -0.142 | -0.4   |
| A020258_01 | At5g22630 | chorismate mutase/prephenate dehydratase-like prc     | -1.618 | -1.494 | -0.426 | -0.149 |
| A020260_01 | At3g01700 | arabinogalactan-protein (AGP11); protein id: At3g01   | -0.81  | -0.406 | -0.452 | -1.411 |
| A020264_01 | At5g09900 | putative 26S proteasome p55 protein; protein id: At   | 0.703  | 0.381  | 0.695  | 1.52   |
| A020265_01 | At4g13950 | expressed protein; protein id: At4g13950.1            | 0.809  | 1.046  | 0.87   | 0.978  |
| A020267_01 | At5g14800 | pyrroline-5-carboxylate reductase; protein id: At5g1  | 0.318  | 0.256  | 0.083  | 0.492  |
| A020268_01 | At5g11280 | unknown protein; protein id: At5g11280                | -0.055 | 0.238  | 0.049  | 0.099  |
| A020272_01 | At5g18800 | NADH:ubiquinone oxidoreductase - like protein; pro    | 0.687  | 0.556  | 0.429  | 0.112  |
| A020273_01 | At5g57655 | expressed protein; protein id: At5g57655.2            | -0.922 | -1.527 | -0.727 | -0.893 |
| A020274_01 | At5g55190 | putative small Ras GTP-binding protein                | 0.396  | 0.342  | 0.372  | 0.622  |
| A020281_01 | At1g18660 | expressed protein; protein id: At1g18660.1            | -0.113 | -0.387 | -0.171 | 0.315  |
| A020283_01 | At3g63260 | ATMRK1; protein id: At3g63260.1                       | -0.475 | NA     | -0.047 | -0.579 |
| A020286_01 | At3g23560 | expressed protein; protein id: At3g23560.1            | 0.497  | 0.38   | 0.614  | 0.824  |
| A020289_01 | At1g21680 | expressed protein; protein id: At1g21680.1            | -1.837 | -1.557 | -1.781 | -1.995 |
| A020290_01 | At4g17940 | putative protein; protein id: At4g17940.1             | -1.096 | -1.248 | -0.608 | -1.053 |
| A020291_01 | At3g12780 | phosphoglycerate kinase, putative; protein id: At3g1  | 0.293  | 0.155  | -0.432 | 0.275  |
| A020293_01 | At3g02530 | putative chaperonin; protein id: At3g02530.1          | 0.716  | 0.525  | 0.65   | 0.923  |
| A020294_01 | At1g16210 | expressed protein; protein id: At1g16210.1            | 0.124  | -0.313 | 0.104  | -0.108 |
| A020295_01 | At1g80530 | nodulin-like protein; protein id: At1g80530.1         | 0.309  | 0.423  | 0.465  | 0.577  |
| A020296_01 | At5g01650 | Macrophage migration inhibitory factor (MIF) family;  | 0.12   | 0.115  | 0.299  | 0.169  |
| A020297_01 | At4g24160 | putative protein; protein id: At4g24160.1             | -0.455 | -0.917 | -0.509 | -0.433 |
| A020298_01 | At5g64250 | 2-nitropropane dioxygenase-like protein; protein id:  | -0.56  | -0.7   | -0.396 | -0.467 |
| A020299_01 | At3g13200 | expressed protein; protein id: At3g13200.1            | -0.262 | -0.336 | 0.013  | -0.131 |
| A020300_01 | At1g22780 | putative 40S ribosomal protein S18; protein id: At1g  | 0.89   | 1.057  | 0.976  | 0.7    |
| A020301_01 | At1g30200 | expressed protein; protein id: At1g30200.1            | -0.446 | -0.468 | -0.259 | -0.299 |
| A020303_01 | At5g19510 | elongation factor 1B alpha-subunit; protein id: At5g1 | 0.638  | 0.735  | 0.669  | 0.692  |
| A020305_01 | At1g35420 | expressed protein; protein id: At1g35420.1            | -0.693 | -0.286 | -0.389 | -0.698 |
| A020306_01 | At1g74410 | putative RING zinc finger protein; protein id: At1g74 | -0.965 | -0.803 | -0.624 | -0.62  |
| A020308_01 | At1g03350 | expressed protein; protein id: At1g03350.1            | -0.52  | -0.531 | -0.023 | 0.591  |
| A020309_01 | At4g26950 | putative protein; protein id: At4g26950.1             | -1.356 | -1.377 | NA     | NA     |
| A020311_01 | At2g30620 | histone H1; protein id: At2g30620.1                   | 0.138  | 0.121  | -0.425 | -0.527 |
| A020312_01 | At5g13240 | putative protein; protein id: At5g13240.1             | -0.089 | -0.144 | -0.652 | -0.624 |
| A020314_01 | At2g28190 | copper/zinc superoxide dismutase (CSD2); protein i    | 1.504  | 1.319  | 1.253  | 1.816  |
| A020317_01 | At4g27410 | putative protein; protein id: At4g27410.2             | -3.109 | NA     | -1.726 | -1.79  |
| A020318_01 | At4g26650 | heterogeneous nuclear ribonucleoprotein (hnRNP),      | 0.421  | NA     | 0.041  | 0.226  |
| A020319_01 | At4g31990 | aspartate aminotransferase; protein id: At4g31990     | -0.04  | -0.288 | -0.182 | 0.26   |
| A020320_01 | At3g24160 | type 1 membrane protein, putative; protein id: At3g2  | -0.179 | -0.361 | -0.41  | -0.262 |
| A020321_01 | At3g16910 | AMP-binding protein, putative; protein id: At3g16910  | -0.643 | -0.616 | -0.231 | -0.365 |
| A020322_01 | At3g25070 | unknown protein; protein id: At3g25070.1              | -0.431 | -0.591 | -0.328 | -0.839 |
| A020323_01 | At1g55150 | ethylene-responsive DEAD/DEAH box RNA helicase        | 0.187  | 0.249  | 0.215  | 0.304  |
| A020324_01 | At5g53490 | thylakoid luminal 17.4 kD pentapeptide repeat fami    | 0.019  | 0.292  | -0.334 | -0.666 |
| A020325_01 | At2g01170 | amino acid permease family; protein id: At2g01170.    | -0.243 | NA     | NA     | NA     |
| A020326_01 | At2g38710 | expressed protein; protein id: At2g38710.1            | -0.983 | -0.688 | -0.082 | -0.066 |
| A020327_01 | At5g60990 | DEAD/DEAH box RNA helicase protein, putative; pr      | 0.647  | 0.51   | 0.313  | 0.592  |

|            |           |                                                                                 |        |    |        |        |
|------------|-----------|---------------------------------------------------------------------------------|--------|----|--------|--------|
| A020330_01 | At2g44790 | phytoecyanin; protein id: At2g44790.1                                           | -0.652 | NA | NA     | -0.479 |
| A020331_01 | At1g69340 | expressed protein; protein id: At1g69340.1                                      | -0.009 |    | -0.1   | -0.598 |
| A020332_01 | At1g67230 | nuclear matrix constituent protein 1, putative; protein id: At1g67230.1         | 0.17   | NA | NA     | -0.029 |
| A020333_01 | At3g05710 | syntaxin SYP43; protein id: At3g05710.1                                         | 0.35   |    | 0.22   | 0.396  |
| A020336_01 | At5g53310 | putative protein; protein id: At5g53310.1                                       | -0.538 | NA |        | -0.304 |
| A020337_01 | At3g06050 | expressed protein; protein id: At3g06050.1                                      | 0.391  |    | 0.02   | 0.182  |
| A020338_01 | At5g13040 | putative protein; protein id: At5g13040.1                                       | 0.023  |    | -0.291 | -0.48  |
| A020340_01 | At3g43980 | ribosomal S29 -like protein; protein id: At3g43980.1                            | 0.977  |    | 0.717  | 0.955  |
| A020341_01 | At5g04810 | putative protein; protein id: At5g04810.1                                       | -0.466 |    | -0.525 | -0.594 |
| A020342_01 | At2g05630 | AtAPG8d; putative microtubule-associated protein; protein id: At2g05630.1       | -0.781 |    | -0.396 | NA     |
| A020343_01 | At3g21870 | PREG-like protein, putative; protein id: At3g21870.1                            | -0.587 | NA |        | -0.321 |
| A020344_01 | At2g29420 | glutathione transferase, putative; protein id: At2g29420.1                      | -1.741 |    | -1.683 | -0.809 |
| A020345_01 | At2g45530 | expressed protein; protein id: At2g45530.1                                      | -1.193 |    | -0.759 | -0.66  |
| A020346_01 | At5g54600 | 50S ribosomal protein L24, chloroplast precursor; protein id: At5g54600.1       | 0.287  |    | 0.526  | 0.086  |
| A020347_01 | At4g31130 | putative protein; protein id: At4g31130.1                                       | -0.599 |    | -0.48  | -0.348 |
| A020348_01 | At5g05690 | cytochrome p450, putative; protein id: At5g05690.1                              | -0.208 | NA | NA     | -0.005 |
| A020349_01 | At3g26060 | putative peroxiredoxin; protein id: At3g26060.1                                 | 1.41   |    | 1.309  | 0.504  |
| A020350_01 | At3g15500 | putative jasmonic acid regulatory protein; protein id: At3g15500.1              | -3.368 | NA |        | -1.669 |
| A020352_01 | At4g39090 | cysteine proteinase RD19A; protein id: At4g39090.1                              | -2.786 |    | -2.226 | -0.961 |
| A020353_01 | At2g46390 | expressed protein; protein id: At2g46390.1                                      | -0.09  |    | 0.038  | -0.035 |
| A020356_01 | At1g61520 | light-harvesting chlorophyll a/b binding protein; protein id: At1g61520.1       | -0.288 |    | -0.717 | -0.453 |
| A020360_01 | At3g13080 | ABC transporter family protein; protein id: At3g13080.1                         | -1.06  |    | -1.352 | -0.287 |
| A020362_01 | At1g20560 | expressed protein; protein id: At1g20560.1                                      | -0.176 |    | -0.325 | -0.159 |
| A020363_01 | At2g39800 | delta-1-pyrroline 5-carboxylase synthetase (P5C1); protein id: At2g39800.1      | -0.728 |    | -0.786 | -0.569 |
| A020364_01 | At5g51010 | expressed protein; protein id: At5g51010.1                                      | 0.364  |    | 0.214  | 0.031  |
| A020367_01 | At1g42960 | expressed protein; protein id: At1g42960.1                                      | 0.017  |    | 0.209  | 0.229  |
| A020368_01 | At2g31380 | salt tolerance-like protein; protein id: At2g31380.1                            | -0.594 |    | -0.846 | 0.129  |
| A020369_01 | At2g43750 | cysteine synthase (cpACS1); protein id: At2g43750.1                             | 0.061  |    | 0.142  | -0.022 |
| A020370_01 | At5g39570 | putative protein; protein id: At5g39570.1                                       | 0.059  |    | 0.151  | 0.283  |
| A020371_01 | At1g75100 | expressed protein; protein id: At1g75100.1                                      | -1.419 |    | -1.446 | -1.177 |
| A020372_01 | At4g15475 | F-box protein family, AtFBL4; protein id: At4g15475.1                           | -0.218 | NA | NA     | 0.019  |
| A020373_01 | At2g25800 | unknown protein; protein id: At2g25800.1                                        | 0.067  |    | 0.428  | -0.079 |
| A020375_01 | At4g30010 | putative protein; protein id: At4g30010.1                                       | -0.03  |    | 0.103  | 0.519  |
| A020376_01 | At3g60820 | 20S proteasome beta subunit F1 (PBF1); protein id: At3g60820.1                  | -0.032 |    | -0.102 | 0.186  |
| A020378_01 | At5g10810 | enhancer of rudimentary; protein id: At5g10810.1                                | 0.084  |    | 0.027  | -0.008 |
| A020379_01 | At4g36780 | putative protein; protein id: At4g36780.1                                       | -0.153 | NA |        | 0.059  |
| A020380_01 | At2g47710 | expressed protein; protein id: At2g47710.1                                      | -0.722 |    | -0.661 | 0.192  |
| A020381_01 | At5g28060 | 40S ribosomal protein S19 - like; protein id: At5g28060.1                       | 1.088  |    | 0.833  | 0.857  |
| A020382_01 | At1g71220 | putative UDP-glucose:glycoprotein glucosyltransferase; protein id: At1g71220.1  | 1.043  |    | 0.734  | 0.619  |
| A020383_01 | At2g45030 | mitochondrial elongation factor, putative; protein id: At2g45030.1              | 0.704  |    | 0.491  | 0.663  |
| A020384_01 | At4g19120 | putative protein; protein id: At4g19120.1                                       | 0.731  |    | 0.489  | 0.031  |
| A020385_01 | At2g21160 | putative signal sequence receptor, alpha subunit (S); protein id: At2g21160.1   | 0.774  |    | 0.835  | 0.454  |
| A020386_01 | At3g56460 | quinone reductase-like protein; protein id: At3g56460.1                         | -0.249 |    | -0.448 | 0.001  |
| A020390_01 | At2g22500 | mitochondrial carrier protein family; protein id: At2g22500.1                   | 0.716  |    | 0.723  | 0.567  |
| A020392_01 | At2g03680 | putative nitrilase-associated protein; protein id: At2g03680.1                  | 0.459  |    | 0.406  | 0.445  |
| A020393_01 | At2g43350 | glutathione peroxidase, putative; protein id: At2g43350.1                       | 0.7    |    | 0.429  | 0.39   |
| A020394_01 | At3g10410 | putative serine carboxypeptidase precursor; protein id: At3g10410.1             | -0.037 |    | 0.107  | 0.101  |
| A020395_01 | At2g43640 | putative signal recognition particle protein 14kD, AT; protein id: At2g43640.1  | 0.588  |    | 0.796  | 0.499  |
| A020396_01 | At5g27840 | serine/threonine protein phosphatase type one (PP1); protein id: At5g27840.1    | -0.767 |    | -0.474 | -0.323 |
| A020399_01 | At3g01480 | thylakoid lumen rotamase; protein id: At3g01480.1                               | 0.224  |    | 0.362  | -0.262 |
| A020400_01 | At3g15630 | expressed protein; protein id: At3g15630.1                                      | -1.604 |    | -1.203 | -0.304 |
| A020401_01 | At5g05780 | 26S proteasome regulatory subunit S12 (RPN8), putative; protein id: At5g05780.1 | 0.29   |    | 0.551  | 0.229  |
| A020403_01 | At3g43800 | glutathione transferase, putative; protein id: At3g43800.1                      | -0.873 |    | -0.918 | -0.125 |
| A020404_01 | At5g44120 | legumin-like protein; protein id: At5g44120.1                                   | -4.524 |    | -4.696 | -2.629 |
| A020406_01 | At2g04390 | 40S ribosomal protein S17; protein id: At2g04390.1                              | 0.911  |    | 0.92   | 0.951  |
| A020410_01 | At2g28470 | glycosyl hydrolase family 35 (beta-galactosidase); protein id: At2g28470.1      | 1.76   |    | 1.394  | 1.129  |
| A020412_01 | At5g02810 | putative protein; protein id: At5g02810.1                                       | -0.412 |    | -0.643 | -0.902 |
| A020413_01 | At3g08510 | phosphoinositide specific phospholipase C (AtPLC2); protein id: At3g08510.1     | 0.52   |    | -0.125 | -0.44  |
| A020418_01 | At5g53140 | putative protein phosphatase 2C; protein id: At5g53140.1                        | 0.176  |    | 0.139  | 0.097  |
| A020419_01 | At2g16740 | E2, ubiquitin-conjugating enzyme, putative; protein id: At2g16740.1             | -1.723 |    | -1.927 | -1.18  |
| A020420_01 | At1g55450 | expressed protein; protein id: At1g55450.1                                      | -1.783 | NA | NA     | NA     |
| A020421_01 | At1g78240 | unknown protein; protein id: At1g78240.1                                        | -0.698 |    | -0.537 | -0.871 |
| A020422_01 | At1g68050 | F-box protein FKF1/ADO3, AtFBX2a; protein id: At1g68050.1                       | -0.426 |    | -0.267 | -0.08  |
| A020423_01 | At2g45790 | putative phosphomannomutase; protein id: At2g45790.1                            | 0.473  | NA |        | 0.543  |
| A020424_01 | xxxx      | b/t hypothetical protein; protein id: At1g62305.1 and protein id: At1g62305.1   | -0.413 |    | -0.133 | -0.523 |
| A020425_01 | At3g06330 | expressed protein; protein id: At3g06330.1                                      | -0.197 | NA | NA     | -0.374 |
| A020427_01 | At1g56610 | unknown protein; protein id: At1g56610.1                                        | -0.981 |    | -0.797 | -0.578 |
| A020428_01 | At1g17840 | ABC transporter family protein; protein id: At1g17840.1                         | 0.32   |    | 0.119  | 0.391  |

|            |           |                                                           |           |           |           |        |
|------------|-----------|-----------------------------------------------------------|-----------|-----------|-----------|--------|
| A020435_01 | At4g17830 | N-acetylmethionine deacetylase-like protein, fragment     | -0.225    | -0.466    | -0.06     | -0.026 |
| A020436_01 | At2g36930 | expressed protein; protein id: At2g36930.1                | -0.176    | 0.171     | 0.577     | 0.431  |
| A020437_01 | At2g18040 | putative peptidyl-prolyl cis-trans isomerase; protein     | -0.14     | -0.364    | 0.022     | -0.175 |
| A020438_01 | At4g37200 | thiol-disulfide interchange like protein; protein id: At  | -1.025 NA |           | -0.46     | -0.805 |
| A020440_01 | At5g46430 | ribosomal protein L32; protein id: At5g46430.1            | 0.319     | 0.792     | 0.556     | 0.789  |
| A020441_01 | At5g66810 | putative protein; protein id: At5g66810.1                 | -0.595    | -0.63     | -0.487    | 0.146  |
| A020442_01 | At1g52380 | expressed protein; protein id: At1g52380.1                | 0.389     | 0.308     | 0.178     | 0.175  |
| A020443_01 | At5g11760 | putative protein; protein id: At5g11760.1                 | -0.02     | 0.112     | 0.308     | 0.119  |
| A020444_01 | At2g28060 | expressed protein; protein id: At2g28060.1                | -0.359    | -0.313    | 0.204     | -0.257 |
| A020445_01 | At5g44250 | putative protein; protein id: At5g44250.1                 | -0.61     | -0.854    | -0.24     | -0.018 |
| A020446_01 | At5g08560 | WD-repeat protein-like; protein id: At5g08560.1           | -0.408    | -0.316    | -0.319    | 0.026  |
| A020452_01 | At3g13520 | arabinogalactan-protein (AGP12); protein id: At3g13       | 1.022     | 0.629     | 0.604     | 0.747  |
| A020455_01 | At2g31490 | expressed protein; protein id: At2g31490.1                | 0.325     | 0.323     | 0.123     | -0.082 |
| A020460_01 | At4g16670 | hypothetical protein; protein id: At4g16670.1             | -1.871    | -1.901 NA |           | -0.949 |
| A020461_01 | At5g20230 | blue copper binding protein; protein id: At5g20230.1      | -0.708    | -0.215    | -0.558    | -1.214 |
| A020464_01 | xxxx      | No hits found                                             | -0.257    | -0.124    | 0.05      | 0.336  |
| A020467_01 | xxxx      | b/t leucine-rich repeat transmembrane protein kinas       | 0.429     | 0.382     | 0.441     | 0.834  |
| A020470_01 | At5g63890 | histidinol dehydrogenase; protein id: At5g63890.2         | 0.707     | 0.818     | 0.628     | 0.984  |
| A020471_01 | At5g61970 | signal recognition particle - like protein; protein id: A | 0.378 NA  |           | -0.288    | 0.106  |
| A020472_01 | At2g03820 | putative nonsense-mediated mRNA decay protein; p          | 0.139     | 0.144     | 0.3       | 0.354  |
| A020474_01 | At2g34860 | unknown protein; protein id: At2g34860.1                  | 0.074     | -0.031    | -0.316    | -0.577 |
| A020477_01 | At5g35100 | putative protein; protein id: At5g35100.1                 | NA        | NA        | 0.112     | -1.069 |
| A020478_01 | At5g50320 | histone acetyltransferase; protein id: At5g50320.1        | 0.036     | 0.131 NA  |           | 0.148  |
| A020480_01 | At5g63870 | ser/thr protein phosphatase catalytic subunit; protei     | -0.008 NA |           | 0.198     | 0.665  |
| A020481_01 | At3g18940 | expressed protein; protein id: At3g18940.1                | 0.965     | 0.993     | 0.548     | 0.78   |
| A020482_01 | At2g23810 | hypothetical protein; protein id: At2g23810.1             | -1.107    | -1.521    | -0.761    | -0.798 |
| A020484_01 | At5g67480 | putative protein; protein id: At5g67480.1                 | -0.185 NA |           | -0.461    | -0.754 |
| A020486_01 | At1g10720 | expressed protein; protein id: At1g10720.1                | -0.29     | -0.129    | 0.034     | -0.039 |
| A020488_01 | At2g39710 | expressed protein; protein id: At2g39710.1                | NA        | NA        | NA        | NA     |
| A020489_01 | At1g01730 | expressed protein; protein id: At1g01730.1                | -0.53     | -0.1      | 0.308     | 0.425  |
| A020490_01 | At4g27760 | forever young gene (FEY); protein id: At4g27760.1         | 0.859     | 0.739     | 0.406     | 0.482  |
| A020491_01 | At3g09050 | unknown protein; protein id: At3g09050.1                  | -0.237 NA | NA        |           | -0.58  |
| A020493_01 | At3g13350 | expressed protein; protein id: At3g13350.1                | -0.315    | -0.346    | -0.204    | -0.497 |
| A020497_01 | At2g47910 | expressed protein; protein id: At2g47910.1                | -1.108    | -0.474    | -0.656    | -1.356 |
| A020498_01 | At4g01400 | hypothetical protein; protein id: At4g01400.1             | 0.019     | 0.009     | 0.055     | 0.38   |
| A020500_01 | At1g34570 | expressed protein; protein id: At1g34570.1                | -0.389    | -0.507    | -0.268 NA |        |
| A020501_01 | At5g61440 | thioredoxin-like 3; protein id: At5g61440.1               | 0.226     | 0.074     | 0.734     | 0.91   |
| A020502_01 | At1g30480 | DNA damage repair protein, putative; protein id: At1      | 0.304     | 0.259     | 0.268     | 0.561  |
| A020504_01 | At3g21760 | putative UDP-glucose glucosyltransferase; protein id      | -0.8 NA   | NA        |           | -0.787 |
| A020505_01 | At1g55160 | expressed protein; protein id: At1g55160.1                | 0.364     | 0.256     | 0.367     | 0.148  |
| A020506_01 | At4g32040 | homeodomain containing protein 1; protein id: At4g:       | -0.635    | -0.584    | -0.391    | -0.332 |
| A020507_01 | At3g02860 | expressed protein; protein id: At3g02860.1                | -0.13     | -0.307    | -0.114    | -0.185 |
| A020509_01 | At3g19010 | expressed protein; protein id: At3g19010.1                | -1.318    | -1.203    | -1.109    | -0.949 |
| A020510_01 | At1g68140 | unknown protein; protein id: At1g68140.1                  | -0.733    | -0.871    | -0.287    | -0.73  |
| A020511_01 | At3g11450 | putative cell division related protein; protein id: At3g  | 0.162     | 0.196     | -0.052    | -0.2   |
| A020512_01 | At1g23060 | expressed protein; protein id: At1g23060.1                | -0.905    | -0.928    | 0.185     | 0.347  |
| A020514_01 | At3g22110 | 20S proteasome alpha subunit C (PAC1); protein id         | 0.089     | -0.063    | 0.188     | 0.474  |
| A020515_01 | At5g58350 | MAP kinase; protein id: At5g58350.1                       | -2.371    | -2.148    | -1.002    | -1.23  |
| A020516_01 | At5g20720 | chloroplast Cpn21 protein; protein id: At5g20720.1        | 1.14      | 0.961     | 0.693     | 0.919  |
| A020520_01 | At4g21210 | putative protein; protein id: At4g21210.1                 | 0.269     | -0.101    | -0.429    | -0.299 |
| A020521_01 | At4g12670 | putative protein; protein id: At4g12670.1                 | -0.943    | -0.451    | 0.067     | 0.297  |
| A020522_01 | At2g30740 | putative protein kinase; protein id: At2g30740.1          | -0.103    | -0.045 NA |           | -0.041 |
| A020523_01 | At3g59640 | putative protein; protein id: At3g59640.1                 | NA        | NA        | NA        | -0.806 |
| A020524_01 | At3g02040 | expressed protein; protein id: At3g02040.1                | 0.911     | 1.069     | 0.99      | 1.412  |
| A020529_01 | At3g11410 | hypothetical protein; protein id: At3g11410.1             | -1.575    | -1.871    | -0.965    | -1.26  |
| A020530_01 | At1g29240 | unknown protein; protein id: At1g29240.1                  | -1.677 NA |           | -1.355    | -1.716 |
| A020533_01 | At4g35580 | NAM / CUC2 -like protein; protein id: At4g35580.1         | -0.521    | -1.015    | 0.065     | 0.071  |
| A020534_01 | At5g38520 | putative protein; protein id: At5g38520.1                 | -0.457    | -0.116    | -0.36     | -0.162 |
| A020535_01 | At2g25430 | expressed protein; protein id: At2g25430.1                | -0.156    | -0.262    | -0.079    | -0.818 |
| A020537_01 | At1g71260 | unknown protein; protein id: At1g71260.1                  | NA        | 0.695     | 0.679     | 0.958  |
| A020541_01 | At2g42490 | putative copper amine oxidase; protein id: At2g4249       | -0.37     | -1.044    | -0.635    | -1.108 |
| A020542_01 | At2g43080 | hypothetical protein; protein id: At2g43080.1             | -0.157 NA |           | -0.118    | -0.079 |
| A020543_01 | At5g59080 | putative protein; protein id: At5g59080.1                 | NA        | NA        | NA        | NA     |
| A020544_01 | At2g39290 | putative CDP-diacylglycerol--glycerol-3-phosphate 3       | 0.606     | 0.433     | 0.434     | 0.344  |
| A020546_01 | At2g17220 | putative protein kinase; protein id: At2g17220.1          | -0.917    | -1.063    | -0.176    | -0.989 |
| A020547_01 | At4g34720 | vacuolar H+-transporting ATPase 16K chain                 | -0.149    | -0.137    | -0.043    | -0.55  |
| A020549_01 | At3g49360 | 6-phosphogluconolactonase - like protein; protein id      | -0.61     | -0.468    | 0.366     | 0.207  |
| A020550_01 | At3g07110 | putative 60S ribosomal protein L13A; protein id: At3      | 0.796     | 0.916     | 0.716     | 0.978  |



|            |           |                                                                   |           |           |        |        |
|------------|-----------|-------------------------------------------------------------------|-----------|-----------|--------|--------|
| A020551_01 | At4g03260 | putative protein phosphatase regulatory subunit; prc              | -0.817    | -0.84     | -0.284 | -0.71  |
| A020553_01 | At1g29040 | expressed protein; protein id: At1g29040.1                        | 0.607     | 0.822     | 0.438  | 0.463  |
| A020554_01 | At2g06530 | expressed protein; protein id: At2g06530.1                        | -0.415    | -0.389    | 0.031  | -0.399 |
| A020556_01 | At3g22840 | early light-induced protein; protein id: At3g22840.1              | 1.097     | 1         | 0.771  | 0.935  |
| A020557_01 | At5g23740 | 40S ribosomal protein S11; protein id: At5g23740.1                | 0.727 NA  |           | 0.978  | 0.489  |
| A020559_01 | At3g60530 | GATA zinc finger protein; protein id: At3g60530.1                 | 0.772     | 1.081     | 1.183  | 1.446  |
| A020560_01 | At3g47340 | glutamine-dependent asparagine synthetase; protei                 | -2.146    | -2.007    | -1.257 | -1.48  |
| A020562_01 | At2g31440 | unknown protein; protein id: At2g31440.1                          | 0.229     | 0.349     | 0.112  | 0.198  |
| A020563_01 | At3g23490 | cyanate lyase (CYN); protein id: At3g23490.1                      | -0.756    | -0.556    | -0.358 | -0.61  |
| A020564_01 | At1g27290 | expressed protein; protein id: At1g27290.1                        | -1.008    | -1.295    | -0.447 | -1.198 |
| A020565_01 | At3g10980 | unknown protein; protein id: At3g10980.1                          | -0.976    | -0.516    | -0.404 | -0.555 |
| A020570_01 | At5g57660 | putative CONSTANS B-box zinc finger protein; prot                 | -0.966 NA |           | -0.516 | -1.148 |
| A020571_01 | At1g45474 | light-harvesting chlorophyll a/b binding protein; prote           | -0.176    | -0.205    | -0.309 | -0.657 |
| A020572_01 | At4g29596 | multidrug resistance P-glycoprotein, putative; protei             | 0.365     | 0.075     | 0.428  | 0.28   |
| A020573_01 | At1g73990 | SppA protease IV (SppA); protein id: At1g73990.1                  | -0.19     | 0.12      | -0.278 | -0.118 |
| A020575_01 | At2g32090 | expressed protein; protein id: At2g32090.1                        | -0.2      | -0.23     | -0.176 | -0.67  |
| A020576_01 | At2g33220 | expressed protein; protein id: At2g33220.1                        | 0.394     | 0.282     | 0.129  | -0.112 |
| A020577_01 | At2g33120 | putative synaptobrevin; protein id: At2g33120.1                   | -0.56     | -0.625    | -0.362 | -0.715 |
| A020578_01 | At5g17310 | UDP-glucose pyrophosphorylase; protein id: At5g17                 | 0.65      | 0.488     | 0.006  | 0.066  |
| A020579_01 | At5g62090 | putative protein; protein id: At5g62090.1                         | -0.146 NA | NA        |        | -0.501 |
| A020580_01 | At4g34230 | cinnamyl alcohol dehydrogenase - like protein; prote              | -2.423    | -2.636    | -1.065 | -1.336 |
| A020581_01 | At1g06670 | DEIH-box RNA/DNA helicase; protein id: At1g06670.1                | 0.354 NA  | NA        |        | 0.156  |
| A020584_01 | At5g15410 | cyclic nucleotide-regulated ion channel (CNGC2); p                | -0.315    | -0.185    | -0.16  | 0.191  |
| A020585_01 | At1g61620 | expressed protein; protein id: At1g61620.1                        | -0.187    | -0.263 NA |        | -0.443 |
| A020586_01 | At2g31400 | unknown protein; protein id: At2g31400.1                          | -0.428    | -0.304    | -0.154 | -0.181 |
| A020587_01 | At1g66340 | ethylene-response protein, ETR1; protein id: At1g66               | -0.247 NA | NA        |        | -0.09  |
| A020588_01 | At3g60690 | putative protein; protein id: At3g60690.1                         | -2.715 NA |           | -1.852 | -2.552 |
| A020589_01 | At5g65210 | bZIP transcription factor, TGA1; protein id: At5g652              | -3.056 NA |           | -1.946 | -2.647 |
| A020590_01 | At5g48380 | receptor-like protein kinase; protein id: At5g48380.1             | -0.673    | -1.081    | -1.16  | -1.072 |
| A020592_01 | At5g48480 | expressed protein; protein id: At5g48480.1                        | 0.429     | 0.338     | 0.475  | 0.722  |
| A020593_01 | At3g20970 | expressed protein; protein id: At3g20970.1                        | 0.422     | 0.433     | 0.267  | -0.034 |
| A020594_01 | At4g23690 | disease resistance response protein family/ dirigent              | 0.78      | 0.715     | 0.631  | 0.506  |
| A020595_01 | At3g63500 | putative protein; protein id: At3g63500.1                         | -0.954    | -1.08 NA  | NA     |        |
| A020599_01 | At1g79500 | 2-dehydro-3-deoxyphosphooctonate aldolase, putat                  | 1.364     | 1.124     | 0.898  | 1.306  |
| A020600_01 | At3g15480 | expressed protein; protein id: At3g15480.1                        | 0.744     | 0.652     | 0.311  | 0.065  |
| A020601_01 | At1g56210 | copper chaperone (CCH)-related; protein id: At1g56                | 0.384     | 0.425     | 0.864  | 1.135  |
| A020602_01 | At2g39940 | coronatine-insensitive 1 (COI1), AtFBL2; protein id:              | -0.965    | -0.857    | -0.815 | -1.088 |
| A020603_01 | At5g06530 | ABC transporter family protein; protein id: At5g0653              | -2.854    | -2.615    | -1.02  | -1     |
| A020604_01 | At3g48680 | putative protein; protein id: At3g48680.1                         | -0.467    | -0.256    | 0.184  | 0.249  |
| A020605_01 | At2g25450 | putative dioxygenase; protein id: At2g25450.1                     | -4.149    | -4.375    | -2.464 | -3.48  |
| A020606_01 | At5g52920 | pyruvate kinase; protein id: At5g52920.1                          | 0.228     | 0.196     | 0.333  | 0.747  |
| A020608_01 | At5g55290 | expressed protein; protein id: At5g55290.1                        | 0.165     | -0.039    | 0.126  | -0.742 |
| A020610_01 | At5g53560 | putative cytochrome b5 protein; protein id: At5g5356              | -0.058    | 0.037     | 0.385  | 0.317  |
| A020611_01 | At1g07990 | unknown protein; protein id: At1g07990.1                          | -0.473    | -0.718 NA |        | -0.589 |
| A020612_01 | At5g54430 | putative protein; protein id: At5g54430.1                         | -0.33     | 0.012     | 0.162  | -0.191 |
| A020613_01 | At4g13550 | putative protein; protein id: At4g13550.1                         | -1.317    | -1.889    | -1.32  | -1.54  |
| A020615_01 | At1g61820 | glycosyl hydrolase family 1; protein id: At1g61820.1 NA           | NA        |           | -2.257 | -1.982 |
| A020616_01 | At2g42310 | unknown protein; protein id: At2g42310.1                          | 0.306     | 0.297     | 0.313  | 0.377  |
| A020617_01 | At1g54100 | aldehyde dehydrogenase homolog, putative; protein                 | -1.866    | -2.223    | -1.256 | -1.198 |
| A020619_01 | At2g44200 | expressed protein; protein id: At2g44200.1                        | -0.325    | -0.73     | -0.504 | -0.487 |
| A020620_01 | At4g02920 | expressed protein; protein id: At4g02920.1                        | -0.712    | -0.918    | -0.882 | -0.714 |
| A020621_01 | At4g09650 | H <sup>+</sup> -transporting ATP synthase-like protein; protein i | 0.011     | 0.197     | -0.376 | -0.898 |
| A020622_01 | At3g47550 | putative protein; protein id: At3g47550.1                         | -0.495 NA |           | -0.217 | -0.336 |
| A020623_01 | At2g34250 | putative protein transport protein SEC61 alpha subu               | 0.444     | 0.35      | 0.106  | 0.515  |
| A020625_01 | At5g22060 | expressed protein; protein id: At5g22060.1                        | -0.22     | -0.025    | 0.565  | 1.068  |
| A020627_01 | At3g17780 | unknown protein; protein id: At3g17780.1                          | 1.033     | 0.872     | 0.441  | 0.266  |
| A020629_01 | At2g46080 | expressed protein; protein id: At2g46080.1                        | -0.774    | -1.025    | -0.287 | -0.395 |
| A020630_01 | At1g75800 | thaumatin, putative; protein id: At1g75800.1                      | -0.482 NA |           | -0.118 | -0.333 |
| A020633_01 | At4g36040 | DnaJ-like protein; protein id: At4g36040.1                        | -2.004    | -1.618    | -1.114 | -0.428 |
| A020638_01 | At3g18190 | chaperonin subunit, putative; protein id: At3g18190.              | 0.139     | 0.248     | 0.043  | 0.355  |
| A020639_01 | At3g20740 | fertilization-independent endosperm protein (FIE); p              | 0.185 NA  | NA        |        | -0.097 |
| A020640_01 | At3g56050 | putative protein kinase; protein id: At3g56050.1                  | -0.479    | -0.31     | -0.059 | -0.246 |
| A020641_01 | At3g03390 | unknown protein; protein id: At3g03390.1                          | -0.074    | -0.198    | -0.122 | -0.421 |
| A020643_01 | At4g28050 | senescence-associated protein -like; protein id: At4              | 1.334     | 1.057     | 0.697  | 0.982  |
| A020645_01 | At2g01490 | expressed protein; protein id: At2g01490.1                        | -1.398    | -1.572    | -0.752 | -0.923 |
| A020646_01 | At3g05840 | shaggy related protein kinase, ASK-GAMMA; protei                  | -0.669    | -0.704    | -0.045 | -0.166 |
| A020647_01 | At1g29340 | arm repeat containing protein, putative; protein id: A NA         | NA        |           | -0.906 | -0.797 |
| A020649_01 | At3g09740 | expressed protein; protein id: At3g09740.1                        | -0.091    | -0.174    | 0.038  | 0.652  |

|            |               |                                                                |        |        |        |        |
|------------|---------------|----------------------------------------------------------------|--------|--------|--------|--------|
| A020650_01 | At1g15340     | expressed protein; protein id: At1g15340.1                     | -0.152 | NA     | -0.278 | -0.459 |
| A020652_01 | At1g12410     | ATP-dependent Clp protease proteolytic subunit (Cl             | 0.303  | 0.129  | 0.129  | 0.024  |
| A020653_01 | At4g25340     | putative protein; protein id: At4g25340.1                      | 0.969  | NA     | 0.606  | 0.946  |
| A020654_01 | At1g49050     | expressed protein; protein id: At1g49050.1                     | -0.759 | -1.427 | -1.216 | -1.068 |
| A020656_01 | At3g29810     | phytochelatin synthetase-like protein; protein id: At3         | -0.626 | -1.017 | -0.295 | -0.501 |
| A020658_01 | At3g12600     | expressed protein; protein id: At3g12600.1                     | 0.483  | 0.207  | NA     | NA     |
| A020659_01 | At3g03630     | O-acetylserine (thiol) lyase; protein id: At3g03630.1          | 1.332  | 1.301  | 0.686  | 1.153  |
| A020660_01 | At4g17270     | putative protein; protein id: At4g17270.1                      | -0.173 | 0.171  | 0.29   | 0.553  |
| A020661_01 | At3g02220     | unknown protein; protein id: At3g02220.1                       | 0.31   | 0.172  | 0.642  | 0.324  |
| A020663_01 | At1g28250     | expressed protein; protein id: At1g28250.1                     | -0.163 | NA     | 0.103  | -0.164 |
| A020664_01 | At3g55030     | phosphatidylglycerophosphate synthase - like protei            | -0.014 | 0.007  | 0.202  | 0.599  |
| A020665_01 | At4g32330     | putative protein; protein id: At4g32330.1                      | 0.626  | 0.067  | -0.355 | -0.598 |
| A020668_01 | At2g20130     | expressed protein; protein id: At2g20130.1                     | 0.059  | -0.022 | 0.35   | -0.029 |
| A020670_01 | At5g67250     | SKP1 interacting partner 2 (SKIP2); protein id: At5g           | -0.073 | -0.186 | -0.045 | -0.348 |
| A020671_01 | At4g27580     | expressed protein; protein id: At4g27580.1                     | -0.74  | -0.68  | -0.724 | NA     |
| A020673_01 | At1g08550     | putative violaxanthin de-epoxidase precursor (U441             | -0.218 | -0.392 | -0.487 | -0.875 |
| A020678_01 | At5g49540     | expressed protein; protein id: At5g49540.1                     | 0.26   | 0.291  | 0.392  | 0.151  |
| A020683_01 | At3g52560     | E2, ubiquitin-conjugating enzyme, putative; protein i          | -0.345 | -0.182 | 0.235  | 0.157  |
| A020684_01 | At2g43150     | putative extensin; protein id: At2g43150.1                     | -0.511 | 0.361  | -0.283 | -0.131 |
| A020686_01 | At2g36630     | unknown protein; protein id: At2g36630.1                       | -1.643 | NA     | -0.731 | -0.677 |
| A020689_01 | At3g44750     | putative histone deacetylase; protein id: At3g44750.           | 1.354  | 1.172  | 1.294  | 1.76   |
| A020690_01 | At3g60190     | dynamain-like protein 4 (ADL4); protein id: At3g6019           | 0.017  | -0.365 | -0.569 | -0.613 |
| A020691_01 | At4g32260     | H <sup>+</sup> -transporting ATP synthase chain 9-like protein | -0.477 | -0.493 | -0.335 | -1.312 |
| A020692_01 | At2g01650     | expressed protein; protein id: At2g01650.1                     | -0.529 | -0.286 | -0.21  | -0.328 |
| A020694_01 | At1g70820     | phosphoglucomutase, putative; protein id: At1g7082             | 0.792  | NA     | -1.039 | -1.22  |
| A020696_01 | At4g25230     | unknown protein; protein id: At4g25230                         | -0.416 | NA     | -0.28  | -0.677 |
| A020697_01 | At1g78630     | ribosomal protein L13, putative; protein id: At1g7863          | 0.583  | 0.508  | 0.463  | 0.993  |
| A020699_01 | At2g30060     | Ran binding protein (AtRanBP1b); protein id: At2g30            | 0.318  | 0.249  | 0.339  | 0.361  |
| A020702_01 | At4g30440     | putative nucleotide sugar epimerase                            | -0.859 | -0.712 | -0.624 | -0.851 |
| A020703_01 | At5g09450     | putative protein; protein id: At5g09450.1                      | 0.371  | 0.435  | -0.04  | 0.427  |
| A020704_01 | At1g02205     | hypothetical protein; protein id: At1g02205.1                  | 0.23   | 0.258  | 0.701  | 1.244  |
| A020705_01 | At5g46210     | cullin; protein id: At5g46210.1                                | 0.142  | -0.299 | -0.533 | -0.588 |
| A020707_01 | At3g26400     | eukaryotic translation initiation factor 4B, putative; p       | 0.182  | -0.212 | NA     | -0.157 |
| A020708_01 | At1g74910     | putative GDP-mannose pyrophosphorylase; protein                | -0.82  | -0.738 | -1.01  | -0.477 |
| A020710_01 | At1g71030     | myb family transcription factor; protein id: At1g7103          | -1.867 | -1.627 | -1.683 | -2.072 |
| A020713_01 | At5g63860     | UVB-resistance protein UVR8 (gb AAD43920.1); prr NA            |        | NA     | -0.078 | -0.339 |
| A020714_01 | At2g44950     | unknown protein; protein id: At2g44950.1                       | -0.298 | -0.462 | NA     | -0.13  |
| A020716_01 | At5g51020     | putative protein; protein id: At5g51020.1                      | -0.317 | -0.396 | -0.166 | -0.251 |
| A020722_01 | At3g61790     | seven in absentia-like protein; protein id: At3g61790          | -0.796 | NA     | NA     | -0.467 |
| A020725_01 | At1g54250     | RNA polymerase II subunit, putative; protein id: At1           | 0.157  | 0.361  | 0.416  | 0.582  |
| A020727_01 | At1g12000     | putative pyrophosphate-fructose-6-phosphate 1-phc              | 1.147  | 1.008  | 1.046  | 1.384  |
| A020728_01 | At1g48410     | leaf development protein Argonaute; protein id: At1g           | 0.3    | 0.016  | 0.335  | 0.58   |
| A020730_01 | At3g18000     | methyltransferase, putative; protein id: At3g18000.1           | 1.865  | 1.43   | 1.566  | 2.235  |
| A020731_01 | At2g40000     | putative nematode-resistance protein; protein id: At           | -3.721 | NA     | -1.827 | -2.254 |
| A020732_01 | At4g17190     | farnesyl pyrophosphate synthetase 2 (FPS2) (farnes             | 1.278  | 1.29   | 0.914  | 1.334  |
| A020733_01 | At5g47770     | farnesyl pyrophosphate synthetase 1 (FPS1) (farnes             | 1.238  | 1.036  | 0.906  | 1.087  |
| A020734_01 | At1g17020     | SRG1-like protein; protein id: At1g17020.1                     | -1.109 | -1.088 | -0.393 | 0.039  |
| A020735_01 | At4g02500     | putative glycosyltransferase; protein id: At4g02500.           | 1.327  | 1.127  | 0.4    | 0.421  |
| A020737_01 | At1g20696     | expressed protein; protein id: At1g20696.1                     | -0.622 | -0.344 | -0.029 | -0.265 |
| A020738_01 | At5g65360     | histone H3 (sp P05203); protein id: At5g65360.1                | 0.73   | 0.504  | 0.5    | 0.013  |
| A020740_01 | At2g02800     | putative protein kinase; protein id: At2g02800.1               | -0.441 | -0.473 | 0.065  | 0.527  |
| A020741_01 | At4g26080     | protein phosphatase ABI1; protein id: At4g26080.1              | -1.364 | -1.592 | -0.59  | -0.96  |
| A020746_01 | At5g01750     | expressed protein; protein id: At5g01750.2                     | -0.823 | -0.876 | -0.229 | -0.476 |
| A020748_01 | At2g05540     | putative glycine-rich protein; protein id: At2g05540.1         | -3.92  | NA     | -1.771 | -3.196 |
| A020750_01 | At5g47540     | putative protein; protein id: At5g47540.1                      | -0.552 | -0.43  | -0.47  | -0.631 |
| A020751_01 | not annotated | Chr1 W/25637330-25637399                                       | -1.64  | -1.694 | -0.694 | -0.388 |
| A020754_01 | At3g02110     | putative serine carboxypeptidase II; protein id: At3g          | 0.621  | 0.453  | 0.601  | 0.543  |
| A020756_01 | At3g03270     | expressed protein; protein id: At3g03270.1                     | -1.177 | -1.319 | -0.64  | -1.318 |
| A020757_01 | At2g18280     | F-box containing tubby family protein; protein id: At          | -0.137 | -0.273 | -0.37  | -0.305 |
| A020759_01 | At4g32660     | protein kinase AME3; protein id: At4g32660.1                   | 0.029  | -0.271 | 0.008  | 0.076  |
| A020760_01 | At4g32940     | gamma-VPE (vacuolar processing enzyme); protein                | -2.379 | -2.931 | -0.981 | -2.128 |
| A020761_01 | At3g30390     | expressed protein; protein id: At3g30390.1                     | -1.328 | -1.254 | -0.778 | -1.001 |
| A020762_01 | At1g49760     | polyadenylate-binding protein (PABP), putative; pro            | 0.945  | 0.812  | 0.595  | 0.654  |
| A020763_01 | At1g10960     | ferredoxin precursor isolog; protein id: At1g10960.1           | -0.215 | 0.053  | 0.012  | -0.305 |
| A020765_01 | At2g22690     | expressed protein; protein id: At2g22690.1                     | -0.812 | -1.104 | -0.257 | -0.727 |
| A020766_01 | At1g79750     | putative malate oxidoreductase; protein id: At1g797            | 0.214  | 0.428  | 0.158  | 0.842  |
| A020767_01 | At5g43320     | casein kinase I; protein id: At5g43320.1                       | -0.684 | -0.442 | -0.197 | -0.503 |
| A020769_01 | At3g51370     | protein phosphatase 2C -like protein; protein id: At3          | -0.095 | -0.338 | -0.344 | -0.297 |

|            |           |                                                           |           |          |        |        |
|------------|-----------|-----------------------------------------------------------|-----------|----------|--------|--------|
| A020771_01 | At5g53350 | ATP-dependent Clp protease ATP-binding subunit (          | -0.826    | -1.309   | -0.841 | -0.681 |
| A020774_01 | At5g14060 | lysine-sensitive aspartate kinase (gb AAB63104.1);        | 0.281     | 0.384    | 0.002  | -0.166 |
| A020777_01 | At2g44500 | similar to axi 1 protein from Nicotiana tabacum; prot     | -1.933 NA | NA       |        | -1.189 |
| A020778_01 | At3g08940 | putative chlorophyll a/b-binding protein; protein id: A   | -0.772    | -0.636   | -0.493 | -0.995 |
| A020780_01 | At2g17190 | putative ubiquitin-like protein; protein id: At2g17190    | 0.118     | 0.216    | -0.111 | 0.168  |
| A020781_01 | At3g02520 | 14-3-3 protein GF14 nu (grf7); protein id: At3g02520      | 0.092     | 0.073    | 0.2    | 0.1    |
| A020784_01 | At5g57050 | protein phosphatase 2C, ABI2; protein id: At5g5705        | -1.447    | -1.551   | -0.999 | -1.314 |
| A020785_01 | At3g01540 | RNA helicase, DRH1; protein id: At3g01540.1               | -0.867    | -0.805   | -0.546 | 0.325  |
| A020788_01 | At3g23050 | indoleacetic acid (IAA)-inducible gene (IAA7); protei     | 0.503     | 0.511    | 0.791  | 0.672  |
| A020795_01 | At1g72150 | cytosolic factor, putative; protein id: At1g72150.1       | -1.45     | -1.798   | -1.484 | -1.501 |
| A020796_01 | At5g13420 | transaldolase - like protein; protein id: At5g13420.1     | 0.33      | 0.015    | 0.192  | -0.012 |
| A020797_01 | At5g52470 | fibrillarlin 1 AtFib1/SKIP7; protein id: At5g52470.1      | 0.518     | 0.51     | 0.582  | 1.206  |
| A020798_01 | At1g58280 | unknown protein; protein id: At1g58280.1                  | 1.026     | 0.632    | 0.901  | 1.125  |
| A020799_01 | At5g64400 | putative protein; protein id: At5g64400.1                 | -0.297    | -0.144   | 0.008  | -0.573 |
| A020800_01 | At2g37250 | putative adenylate kinase; protein id: At2g37250.1        | 0.064     | 0.233    | 0.435  | 0.419  |
| A020802_01 | At2g05840 | 20S proteasome alpha subunit A2 (PAA2); protein id:       | 0.291     | 0.062    | 0.387  | 0.338  |
| A020803_01 | At4g37520 | peroxidase, putative; protein id: At4g37520.1             | -2.475 NA |          | -1.553 | -3.036 |
| A020806_01 | At2g30860 | glutathione transferase, putative; protein id: At2g308    | -1.287    | -1.12    | -0.394 | -0.103 |
| A020807_01 | At4g09000 | 14-3-3 protein GF14 chi (grf1); protein id: At4g09000     | -0.04     | 0.041    | 0.147  | 0.295  |
| A020809_01 | At5g40190 | calmodulin-binding protein; protein id: At5g40190.1       | -0.132    | 0.054    | 0.243  | -0.147 |
| A020811_01 | At5g02560 | putative protein; protein id: At5g02560.1                 | -0.217    | -0.57    | 0.183  | -0.514 |
| A020813_01 | At3g28200 | peroxidase, putative; protein id: At3g28200.1             | 0.673     | 0.927    | -0.043 | -0.072 |
| A020816_01 | At2g22300 | ethylene-induced calmodulin-binding protein, putativ      | -0.523    | -1.428   | -0.839 | -1.45  |
| A020817_01 | At4g08390 | stromal ascorbate peroxidase, putative (sAPX); prot       | 0.722     | 0.777    | 0.411  | 0.648  |
| A020818_01 | At4g18710 | 1-aminocyclopropane-1-carboxylate oxidase; protein        | 0         | 0.017    | 0.051  | -0.103 |
| A020819_01 | At3g48000 | aldehyde dehydrogenase (NAD+)-like protein; prote         | -1.085    | -1.592   | -1.327 | -0.97  |
| A020820_01 | At5g19440 | cinnamyl-alcohol dehydrogenase - like protein; prote      | 0.313     | 0.282    | 0.326  | 0.434  |
| A020821_01 | At1g08490 | nitrogen fixation protein (nifS), putative; protein id: A | -0.112    | -0.312   | 0.097  | -0.035 |
| A020823_01 | At3g01090 | Snf1-related protein kinase KIN10 (AKIN10); proteir       | -0.528    | -0.33    | -0.476 | -0.662 |
| A020825_01 | At1g17530 | inner mitochondrial membrane protein, putative; pro       | -0.354    | -0.305   | 0.248  | -0.326 |
| A020826_01 | At4g01120 | G-box binding factor(bZIP protein), putative; protein     | -0.706    | -0.655   | -0.229 | -0.258 |
| A020827_01 | At3g47730 | ABC transporter family protein; protein id: At3g4773      | -0.997 NA | NA       | NA     |        |
| A020828_01 | At3g19580 | zinc finger protein, putative; protein id: At3g19580.1    | -2.468 NA |          | -0.776 | -2.267 |
| A020831_01 | At3g23590 | unknown protein; protein id: At3g23590.1                  | -0.32     | -0.161   | -0.374 | -0.589 |
| A020835_01 | At1g29070 | plastid ribosomal protein L34 precursor, putative; pr     | 0.695     | 0.953    | 0.381  | 0.131  |
| A020836_01 | At1g05010 | 1-aminocyclopropane-1-carboxylate oxidase; proteir        | -1.934    | -2.077   | -0.786 | -1.576 |
| A020838_01 | At3g25480 | rhodanese-like domain protein; protein id: At3g2548       | 0.233     | 0.169    | 0.201  | 0.084  |
| A020839_01 | At1g35470 | unknown protein; protein id: At1g35470.1                  | 0.118     | -0.118   | 0.112  | 0.594  |
| A020841_01 | At5g60180 | pumilio-family RNA-binding protein, putative; proteir     | -0.609    | -0.521   | -0.479 | 0.104  |
| A020842_01 | At1g04270 | putative 40S ribosomal protein S15; protein id: At1g      | 0.666     | 0.749    | 0.813  | 0.971  |
| A020843_01 | At4g30930 | WRKY family transcription factor; protein id: At4g30      | 1.149     | 1.07     | 0.893  | 1.159  |
| A020844_01 | At5g05080 | E2, ubiquitin-conjugating enzyme, putative; protein i     | 0.313     | -0.106   | 0.478  | 0.389  |
| A020845_01 | At5g16470 | putative protein; protein id: At5g16470.1                 | -0.183    | -0.329   | 0.281  | -0.233 |
| A020847_01 | At1g10070 | tat-binding protein, putative; protein id: At1g10070.1    | -2.969    | -2.979   | -1.731 | -1.784 |
| A020849_01 | At5g17280 | putative protein; protein id: At5g17280.1                 | -0.723    | -0.518   | -0.205 | -0.609 |
| A020850_01 | At2g44350 | citrate synthase; protein id: At2g44350.1                 | 0.133     | 0.086    | 0.061  | 0.493  |
| A020852_01 | At1g15930 | 40S ribosomal protein S12, putative; protein id: At1g     | 0.049     | 0.434    | 0.299  | 0.681  |
| A020853_01 | At3g54670 | structural maintenance of chromosomes (SMC) - lik         | -0.481    | -0.338   | 0.121  | 0.698  |
| A020854_01 | At3g18440 | unknown protein; protein id: At3g18440.1                  | 0.138 NA  | NA       |        | -0.658 |
| A020855_01 | At3g27925 | DegP protease; protein id: At3g27925.1                    | -1.47     | -1.307   | -1.2   | -0.82  |
| A020860_01 | At5g44080 | bZIP transcription factor, G-box binding factor 4-rela    | -0.211    | -0.384   | 0.092  | -0.35  |
| A020861_01 | At4g02840 | small nuclear riboprotein Sm-D1-like protein; proteir     | 0.657     | 0.329    | 0.461  | 0.606  |
| A020863_01 | At2g39730 | auxin-regulated protein; protein id: At2g39730.1          | -1.202    | -0.848   | -0.417 | -0.773 |
| A020866_01 | At5g65630 | putative protein; protein id: At5g65630.1                 | 0.595     | 0.309 NA |        | 0.443  |
| A020868_01 | At3g10020 | expressed protein; protein id: At3g10020.1                | -0.859    | -0.981   | -0.446 | -1.217 |
| A020869_01 | At5g54080 | homogentisate 1,2-dioxygenase; protein id: At5g540        | -2.222    | -2.343   | -1.137 | -2.021 |
| A020870_01 | At4g39980 | 2-dehydro-3-deoxyphosphoheptonate aldolase; prot          | 0.781     | 0.61     | -0.015 | 0.488  |
| A020871_01 | At5g27540 | unknown protein; protein id: At5g27540                    | -0.132    | 0.037    | 0.065  | 0.559  |
| A020872_01 | At4g17050 | hypothetical protein; protein id: At4g17050.1             | 0.7       | 0.43     | 0.406  | 0.729  |
| A020873_01 | At3g21670 | nitrate transporter; protein id: At3g21670.1              | -1.229    | -1.589   | -0.669 | -0.7   |
| A020876_01 | At1g65270 | expressed protein; protein id: At1g65270.1                | 0.356     | 0.1      | 0.135  | 0.05   |
| A020879_01 | At5g48790 | expressed protein; protein id: At5g48790.1                | 0.049     | -0.267   | -0.648 | -0.464 |
| A020880_01 | At4g34050 | caffeoyl-CoA 3-O-methyltransferase; protein id: At4       | -1.738    | -2.211   | -0.869 | -1.248 |
| A020881_01 | At4g08330 | putative protein; protein id: At4g08330.1                 | -0.823    | -0.497   | -0.341 | -0.315 |
| A020882_01 | At2g20760 | expressed protein; protein id: At2g20760.1                | 0.493     | 0.478    | 0.305  | 0.524  |
| A020883_01 | At2g39930 | putative isoamylase; protein id: At2g39930.1              | 0.847     | 0.798    | 0.623  | 1.032  |
| A020889_01 | At4g11600 | glutathione peroxidase, putative; protein id: At4g116     | -0.991    | -0.502   | -0.587 | -0.346 |
| A020892_01 | At3g07330 | unknown protein; protein id: At3g07330.1                  | -0.112    | 0.437    | -0.005 | 0.226  |

|            |           |                                                           |        |        |        |        |
|------------|-----------|-----------------------------------------------------------|--------|--------|--------|--------|
| A020900_01 | At1g20090 | rac family GTP-binding protein (ARAC4); protein id:       | 0.186  | 0.076  | 0.14   | 0.709  |
| A020902_01 | At1g68530 | very-long-chain fatty acid condensing enzyme (CUT         | -0.93  | -0.966 | -0.637 | -0.9   |
| A020905_01 | At5g08260 | serine-type carboxypeptidase II-like protein; protein     | 1.163  | 1.099  | 0.902  | 1.442  |
| A020906_01 | At3g55620 | eukaryotic translation initiation factor 6 (EIF-6) - like | 0.059  | -0.188 | 0.245  | 0.178  |
| A020910_01 | At5g13710 | 24-sterol C-methyltransferase; protein id: At5g13710      | 0.832  | 0.802  | 0.694  | 0.887  |
| A020916_01 | At1g11840 | glyoxalase I, putative (lactoylglutathione lyase); prot   | 1.032  | 0.824  | 0.266  | 0.646  |
| A020917_01 | At1g75380 | wound-responsive protein, putative; protein id: At1g      | -2.198 | -2.687 | -1.808 | -1.764 |
| A020919_01 | At3g25860 | dihydrolipoamide S-acetyltransferase; protein id: At      | 1.342  | 1.109  | 0.792  | 1.095  |
| A020924_01 | At1g69460 | unknown protein; protein id: At1g69460.1                  | 0.383  | 0.118  | 0.244  | NA     |
| A020926_01 | At5g67360 | subtilisin-like serine protease ARA12; protein id: At     | -0.871 | -0.584 | -0.106 | -0.334 |
| A020928_01 | At4g15560 | DEF (CLA1) protein; protein id: At4g15560.1               | -0.01  | -0.116 | -0.466 | -0.239 |
| A020929_01 | At1g01490 | expressed protein; protein id: At1g01490.1                | -1.747 | -1.776 | -1.136 | -1.518 |
| A020930_01 | At1g48750 | lipid transfer protein, putative; protein id: At1g48750   | 0.84   | 0.633  | 1.103  | 1.399  |
| A020934_01 | At5g44720 | putative protein; protein id: At5g44720.1                 | 0.506  | 0.427  | 0.512  | 0.502  |
| A020937_01 | At4g11100 | putative protein; protein id: At4g11100.1                 | 0.469  | 0.434  | 0.302  | 0.019  |
| A020943_01 | At2g47170 | ADP-ribosylation factor 1; protein id: At2g47170.1        | 0.177  | -0.034 | 0.36   | 0.045  |
| A020944_01 | At2g46420 | expressed protein; protein id: At2g46420.1                | 0.56   | 0.267  | 0.725  | 0.96   |
| A020949_01 | At1g76700 | putative DnaJ protein; protein id: At1g76700.1            | -0.599 | -0.551 | -0.419 | NA     |
| A020952_01 | At1g22640 | myb family transcription factor; protein id: At1g2264     | -1.24  | -1.034 | 0.141  | -0.07  |
| A020955_01 | At2g16700 | actin depolymerizing factor 5; protein id: At2g16700      | -1.284 | -1.456 | -1.61  | -2.069 |
| A020958_01 | At1g53580 | glyoxalase II, putative (hydroxyacylglutathione hydr      | -2.236 | -2.204 | -1.076 | -1.427 |
| A020959_01 | At2g20260 | putative photosystem I reaction center subunit IV; p      | -0.321 | -0.184 | -0.467 | -1.466 |
| A020960_01 | At5g07470 | peptide methionine sulfoxide reductase (msr); prote       | -1.274 | -0.99  | -0.594 | -0.841 |
| A020961_01 | At1g21630 | unknown protein; protein id: At1g21630.1                  | -0.231 | NA     | NA     | NA     |
| A020964_01 | At1g08940 | unknown protein; protein id: At1g08940.1                  | -0.353 | NA     | NA     | NA     |
| A020965_01 | At5g45620 | 26S proteasome regulatory subunit (RPN9), putative        | 0.56   | 0.124  | 0.141  | 0.519  |
| A020970_01 | At4g29680 | nucleotide pyrophosphatase - like protein; protein id     | 1.253  | 0.848  | 0.663  | 0.999  |
| A020971_01 | At5g42180 | peroxidase, putative; protein id: At5g42180.1             | -2.716 | -2.933 | -2.964 | -3.519 |
| A020974_01 | At5g43270 | squamosa promoter binding protein-like 2 (emb)CAI         | 0.554  | 0.717  | 0.864  | 1.225  |
| A020976_01 | At3g05930 | germin-like protein; protein id: At3g05930.1              | -0.659 | NA     | -0.417 | NA     |
| A020978_01 | At3g20210 | vacuolar processing enzyme/asparaginyl endopepti          | 1.374  | 1.026  | 1.487  | 1.974  |
| A020980_01 | At5g40370 | glutaredoxin -like protein; protein id: At5g40370.1       | -1.258 | -1.245 | -0.739 | -1.134 |
| A020981_01 | At5g20160 | ribosomal protein L7Ae-like; protein id: At5g20160.1      | 0.239  | 0.392  | 0.756  | 0.906  |
| A020982_01 | At1g06760 | histone H1, putative; protein id: At1g06760.1             | 0.053  | -0.139 | -0.158 | -0.653 |
| A020985_01 | At4g00860 | stress-induced protein OZ11 precursor; protein id: A      | 0.228  | 0.217  | 0.441  | -0.187 |
| A020987_01 | At2g41720 | putative salt-inducible protein; protein id: At2g41720    | 0.573  | 0.255  | -0.296 | -0.191 |
| A020991_01 | At1g78300 | 14-3-3 protein GF14 omega (grf2); protein id: At1g7       | 0.227  | -0.265 | 0.159  | 0.135  |
| A020992_01 | At4g15545 | expressed protein; protein id: At4g15545.1                | -1.213 | -1.473 | -0.889 | -0.446 |
| A020997_01 | At1g67700 | auxin-regulated protein; protein id: At1g67700.2          | 0.054  | -0.155 | -0.388 | -0.91  |
| A020998_01 | At2g47610 | 60S ribosomal protein L7A; protein id: At2g47610.1        | 0.665  | 0.754  | 0.712  | 1.183  |
| A020999_01 | At1g58380 | ribosomal protein S2, putative; protein id: At1g5838      | 0.412  | 0.367  | 0.94   | 1.236  |
| A021002_01 | At4g35890 | putative protein; protein id: At4g35890.1                 | -0.207 | -0.149 | -0.046 | -0.112 |
| A021003_01 | At2g39150 | unknown protein; protein id: At2g39150.1                  | 0.446  | 0.55   | -0.076 | 0.11   |
| A021005_01 | At3g26420 | glycine-rich RNA-binding protein; protein id: At3g26      | 0.262  | 0.532  | 0.414  | 0.441  |
| A021009_01 | At5g25060 | RRM-containing protein; protein id: At5g25060.1           | -0.083 | -0.205 | NA     | -0.751 |
| A021010_01 | At1g09590 | putative 60S ribosomal protein L21; protein id: At1g      | 1.181  | 0.694  | 0.792  | 1.699  |
| A021011_01 | At3g02090 | putative mitochondrial processing peptidase; protei       | 0.32   | 0.154  | 0.193  | 0.462  |
| A021012_01 | At2g41470 | unknown protein; protein id: At2g41470.1                  | 0.264  | 0.307  | 0.471  | 0.188  |
| A021015_01 | At1g61150 | hypothetical protein; protein id: At1g61150.1             | -0.04  | -0.207 | 0.177  | 0.105  |
| A021019_01 | At4g11260 | putative protein; protein id: At4g11260.1                 | -0.213 | -0.101 | -0.113 | -0.199 |
| A021021_01 | At5g28540 | luminal binding protein; protein id: At5g28540.1          | 1.28   | 0.811  | 0.772  | 1.117  |
| A021025_01 | At5g01410 | pyridoxine biosynthesis protein - like; protein id: At5   | -0.131 | -0.186 | 0.15   | 0.257  |
| A021026_01 | At5g65730 | xyloglucan endo-transglycosylase-like protein             | 0.033  | 0.286  | -0.362 | -0.354 |
| A021034_01 | At4g27440 | protochlorophyllide reductase precursor; protein id:      | 1.156  | 1.168  | -0.881 | -0.847 |
| A021035_01 | At5g63190 | topoisomerase, putative; protein id: At5g63190.1          | -1.325 | -1.461 | -1.034 | -0.836 |
| A021037_01 | At4g12420 | pectinesterase (pectin methylesterase) family; prote      | 1.53   | 1.126  | 0.285  | 0.416  |
| A021040_01 | At4g21960 | peroxidase, putative; protein id: At4g21960.1             | 0.17   | 0.039  | 0.257  | 0.713  |
| A021041_01 | At2g44160 | putative methylenetetrahydrofolate reductase; prote       | -0.014 | -0.36  | -0.031 | 0.696  |
| A021042_01 | At4g17090 | glycosyl hydrolase family 14 (beta-amylase); proteir      | -1.223 | -1.327 | -0.862 | -1.036 |
| A021044_01 | At4g24780 | putative pectate lyase; protein id: At4g24780.1           | 0.096  | 0.502  | 0.765  | 1.153  |
| A021045_01 | At2g35820 | expressed protein; protein id: At2g35820.1                | -1.178 | -0.907 | 0.008  | -0.341 |
| A021046_01 | At2g34480 | 60S ribosomal protein L18A; protein id: At2g34480.        | 0.491  | 0.392  | 0.626  | 1.333  |
| A021047_01 | At3g18780 | actin 2; protein id: At3g18780.1                          | -0.452 | -0.301 | -0.525 | -0.446 |
| A021048_01 | At5g58030 | SPP30 - like protein; protein id: At5g58030.1             | 0.769  | 0.67   | 0.717  | 0.61   |
| A021049_01 | At2g27720 | 60S acidic ribosomal protein P2; protein id: At2g27       | 0.872  | 0.705  | 0.578  | 0.555  |
| A021051_01 | At2g21660 | glycine-rich RNA binding protein AtGRP7; protein id       | 0.094  | 0.22   | -0.168 | -0.181 |
| A021053_01 | At5g24770 | vegetative storage protein Vsp2; protein id: At5g247      | 1.121  | 0.784  | -0.13  | -0.4   |
| A021055_01 | At5g67420 | putative protein; protein id: At5g67420.1                 | -1.139 | -1.042 | -0.293 | -0.715 |

|            |                |                                                         |           |           |           |        |
|------------|----------------|---------------------------------------------------------|-----------|-----------|-----------|--------|
| A021057_01 | At1g07890      | ascorbate peroxidase, putative (APX); protein id: At    | 0.439     | 0.269     | 0.546     | 1.019  |
| A021058_01 | At5g64280      | 2-oxoglutarate/malate translocator; protein id: At5g6   | -1.484    | -0.963    | -1.011    | -1.338 |
| A021059_01 | At1g53240      | mitochondrial NAD-dependent malate dehydrogena          | 1.127     | 1.084     | 0.85      | 1.228  |
| A021061_01 | At4g13510      | ammonium transport protein (AMT1); protein id: At4      | -0.728 NA |           | -0.381    | -1.56  |
| A021062_01 | At3g53750      | actin (ACT3); protein id: At3g53750.1                   | 1.097     | 0.94      | 0.598     | 0.895  |
| A021063_01 | At3g61430      | plasma membrane intrinsic protein 1a; protein id: At    | -0.589    | -0.627    | 0.13      | 0.315  |
| A021064_01 | At1g48900      | signal recognition particle 54 kDa protein 2 (SRP54     | 0.374     | 0.189     | 0.186     | 0.797  |
| A021065_01 | At2g37130      | peroxidase, putative (ATP2a); protein id: At2g37130     | -2.362    | -2.489    | -1.11     | -2.38  |
| A021066_01 | At5g42720      | glycosyl hydrolase family 17; protein id: At5g42720.    | 0.159     | -0.094 NA |           | 0.468  |
| A021067_01 | At1g69890      | expressed protein; protein id: At1g69890.1              | -1.434 NA |           | -0.887    | -2.072 |
| A021068_01 | At5g06950      | bZIP transcription factor, HBP-1b homolog; protein i    | -0.246 NA | NA        |           | -0.057 |
| A021069_01 | At5g40760      | glucose-6-phosphate dehydrogenase; protein id: At       | -0.205    | -0.444    | -0.14     | -0.162 |
| A021070_01 | At3g08580      | adenylate translocator; protein id: At3g08580.2         | 0.176     | 0.525     | 0.214     | 1.151  |
| A021071_01 | At4g37790      | homeobox protein HAT22; protein id: At4g37790.1         | -1.977    | -1.678    | -1.3      | -1.563 |
| A021072_01 | At1g23130      | Csf-2-related; protein id: At1g23130.1                  | -3.929    | -4.721    | -2.604    | -3.875 |
| A021073_01 | At2g30410      | TCP1-chaperonin cofactor A isolog; protein id: At2g     | 0.692     | 0.44      | 0.505     | 0.123  |
| A021074_01 | At1g03870      | fasciclin-like arabinogalactan-protein (FLA9); protei   | 0.621     | 0.623     | 0.487     | 0.122  |
| A021076_01 | At4g10450      | putative ribosomal protein L9, cytosolic; protein id: / | 0.852     | 0.902     | 1.226     | 1.081  |
| A021078_01 | At5g01530      | chlorophyll a/b-binding protein CP29                    | -0.21     | -0.209    | -0.491    | -0.9   |
| A021079_01 | At1g10150      | expressed protein; protein id: At1g10150.1              | -1.405 NA |           | -1.152    | -1.159 |
| A021081_01 | At3g53460      | 29 kDa ribonucleoprotein, chloroplast precursor (RN     | 1.066     | 0.764     | -0.137    | -0.061 |
| A021084_01 | At4g35450      | ankyrin repeat-containing protein 2; protein id: At4g;  | 0.113     | -0.029    | -0.078    | -0.03  |
| A021085_01 | At5g26340      | hexose transporter - like protein; protein id: At5g263  | -1.464 NA |           | -1.007 NA |        |
| A021086_01 | At1g06650      | oxidoreductase, putative; protein id: At1g06650.1       | -1.208    | -1.35     | -0.751    | -1.191 |
| A021088_01 | At3g13340      | expressed protein; protein id: At3g13340.1              | -0.263    | -0.16     | -0.194    | 0.193  |
| A021089_01 | At1g62660      | glycosyl hydrolase family 32; protein id: At1g62660.    | -0.055    | -0.317    | -0.256    | -0.535 |
| A021093_01 | At4g20260      | endomembrane-associated protein; protein id: At4g       | -2.171    | -2.307    | -0.956    | -1.644 |
| A021094_01 | At1g21080      | expressed protein; protein id: At1g21080.1              | -0.583    | -0.423    | -0.568 NA |        |
| A021097_01 | At5g42980      | thioredoxin (clone GIF1) (pir S58118); protein id: At   | -1.148    | -1.553    | -0.477    | -0.37  |
| A021099_01 | At3g63490      | chloroplast ribosomal L1 - like protein; protein id: At | 0.285     | 0.238     | 0.067     | 0.036  |
| A021100_01 | At1g02780      | ribosomal protein L19, putative; protein id: At1g027    | 0.981     | 0.538     | 0.657     | 0.953  |
| A021102_01 | At1g67580      | putative protein kinase; protein id: At1g67580.1        | -0.634    | -0.381    | -0.12     | 0.335  |
| A021103_01 | At5g62920      | response regulator 6 (ARR6); protein id: At5g62920      | 0.806     | 1.059     | -0.274    | -0.162 |
| A021104_01 | At4g26750      | putative protein; protein id: At4g26750.1               | -0.66     | -0.391    | -0.188    | 0.238  |
| A021106_01 | At3g49560      | putative protein; protein id: At3g49560.1               | 0.287     | 0.463     | 0.484     | 0.37   |
| A021107_01 | At5g64680      | unknown protein; protein id: At5g64680.1                | 0.486     | 0.269     | 1.053     | 1.079  |
| A021108_01 | At3g01290      | expressed protein; protein id: At3g01290.1              | NA        | NA        | NA        | NA     |
| A021109_01 | At5g53970      | putative tyrosine aminotransferase                      | NA        | NA        | -0.968    | -1.954 |
| A021110_01 | At2g14680      | unknown protein; protein id: At2g14680.1                | -0.297    | -0.297 NA |           | 0.162  |
| A021111_01 | At1g67360      | stress related protein, putative; protein id: At1g6736  | -0.129    | -0.165    | 0.342     | 0.274  |
| A021112_01 | At5g35630      | glutamate-ammonia ligase (EC 6.3.1.2) precursor, c      | -0.207    | -0.073    | -0.123    | 0.188  |
| A021113_01 | At2g01590      | expressed protein; protein id: At2g01590.1              | -0.051    | 0.097     | -0.155    | -0.275 |
| A021117_01 | At3g48890      | putative progesterone-binding protein homolog Atm       | -0.109    | -0.003    | -0.051    | -0.107 |
| A021118_01 | At5g47820      | kinesin-related protein; protein id: At5g47820.1        | 0.292     | -0.091    | 0.319     | 0.235  |
| A021119_01 | At3g61860      | arginine/serine-rich splicing factor, atRSp31; protein  | -0.037    | -0.277    | 0.32      | 0.283  |
| A021120_01 | At1g70780      | EST, expressed protein; protein id: At1g70780.1         | -0.069    | -0.146    | -0.109    | -0.654 |
| A021121_01 | At3g06720      | importin alpha; protein id: At3g06720.2                 | -0.151    | 0.058     | -0.227    | 0.134  |
| A021123_01 | At2g48070      | expressed protein; protein id: At2g48070.1              | 0.366     | 0.476     | 0.234     | -0.024 |
| A021124_01 | At5g55100      | putative protein; protein id: At5g55100.1               | -0.229    | -0.158    | -0.277    | -0.024 |
| A021125_01 | At1g01820      | expressed protein; protein id: At1g01820.1              | -0.432    | -0.619    | -0.287    | -0.591 |
| A021126_01 | At3g10350      | putative ATPase; protein id: At3g10350.1                | -0.129    | -0.243    | -0.225 NA |        |
| A021127_01 | At1g76340      | unknown protein; protein id: At1g76340.1                | 0.35      | 0.052     | 0.359     | 0.513  |
| A021128_01 | At4g27700      | rhodanese-like domain protein; protein id: At4g2770     | 0.039     | -0.355    | -0.335    | -0.584 |
| A021129_01 | At1g59870      | A.t. fasciclin-like arabinogalactan-protein 9 (Fla9) m  | -1.953    | -1.947    | -1.385    | -2.68  |
| A021130_01 | At1g09070      | expressed protein; protein id: At1g09070.1              | -1.351    | -1.279    | -0.499    | -1.104 |
| A021131_01 | At1g76180      | dehydrin, putative; protein id: At1g76180.1             | -0.714    | -1.099    | -0.628    | -0.937 |
| A021132_01 | At5g66140      | 20S proteasome alpha subunit D2 (PAD2); protein i       | 0.273     | 0.657     | 0.492     | 0.771  |
| A021133_01 | At1g11190      | bifunctional nuclease bfn1; protein id: At1g11190.1     | -2.379    | -2.802    | -1.174    | -1.449 |
| A021134_01 | At3g03250      | putative UDP-glucose pyrophosphorylase; protein ic      | 0.548     | 0.148     | 0.147     | 0.461  |
| A021136_01 | At4g37640      | calcium-transporting ATPase 2, plasma membrane-         | 0.255     | 0.179     | 0.452     | 0.796  |
| A021137_01 | At1g64370      | expressed protein; protein id: At1g64370.1              | -3.564    | -4.007    | -2.287    | -3.292 |
| A021139_01 | At2g35870      | unknown protein; protein id: At2g35870.1                | NA        | -0.307 NA |           | 0.068  |
| A021140_01 | xxxx           | b/t hypothetical protein; protein id: At1g62305.1 and   | -0.232 NA |           | -0.706    | -0.061 |
| A021142_01 | not annotatetd | Chr1 W/13147608-13147677 downstream of At1g3            | -1.471    | -1.335    | -0.665    | -0.437 |
| A021146_01 | not annotatetd | Chr4 W/7277126-7277195                                  | -0.13     | 0.106     | -0.01     | 0.206  |
| A021147_01 | At5g07220      | putative protein; protein id: At5g07220.1               | -1.354    | -1.572    | -1.005    | -0.796 |
| A021148_01 | At2g44450      | glycosyl hydrolase family 1; protein id: At2g44450.1    | -0.97     | -0.636    | -0.423    | 0.008  |
| A021149_01 | At2g26560      | patatin, putative; protein id: At2g26560.1              | NA        | NA        | NA        | NA     |

|            |               |                                                          |           |           |           |        |
|------------|---------------|----------------------------------------------------------|-----------|-----------|-----------|--------|
| A021150_01 | At5g24760     | alcohol dehydrogenase - like protein; protein id: At5    | -0.487    | 0.233     | -0.202    | 0.334  |
| A021160_01 | At1g66730     | DNA ligase I, putative; protein id: At1g66730.1          | -1.071    | -0.374    | -0.461    | 0.172  |
| A021195_01 | xxxx          | No hits found                                            | -0.001    | -0.323 NA |           | -0.477 |
| A021200_01 | At5g39530     | putative protein; protein id: At5g39530.1                | 0.288     | 0.235     | 0.052     | -0.056 |
| A021206_01 | At1g63120     | membrane protein, putative; protein id: At1g63120.1      | -0.321    | -0.648    | -0.125    | -0.57  |
| A021207_01 | At5g04740     | putative protein; protein id: At5g04740.1                | 0.242     | 0.126     | 0.055     | 0.214  |
| A021208_01 | At4g19270     | hypothetical protein; protein id: At4g19270.1            | 0.445     | -0.017 NA |           | -0.327 |
| A021209_01 | not annotated | Chr4 C/16247353-1624739616247353-16247396                | -0.907 NA |           | -1.035    | -1.377 |
| A021212_01 | xxxx          | No hits found                                            | 0.286     | 0.294     | 0.591     | 0.055  |
| A021213_01 | At1g07820     | histone H4; protein id: At1g07820.1                      | 1.107     | 0.851     | 0.752     | 0.802  |
| A021214_01 | At4g13850     | glycine-rich RNA-binding protein AtGRP2; protein id:     | 0.432     | 0.379     | 0.377     | 0.556  |
| A021218_01 | At4g26840     | ubiquitin-like protein; protein id: At4g26840.1          | 0.155     | 0.079     | 0.543     | 0.104  |
| A021219_01 | At5g03240     | polyubiquitin (UBQ3); protein id: At5g03240.1            | -1.288    | -1.125    | -1.341    | -1.213 |
| A021220_01 | At5g37780     | calmodulin 1 (CAM1); protein id: At5g37780.1             | 0.299     | -0.071    | 0.12      | -0.034 |
| A021222_01 | At3g62250     | ubiquitin extension protein (UBQ5); protein id: At3g6    | 0.654     | 0.318     | 0.655     | 1.054  |
| A021223_01 | At2g17560     | putative HMG protein; protein id: At2g17560.1            | 0.439     | 0.41      | 0.862     | 0.774  |
| A021224_01 | At3g47560     | putative protein; protein id: At3g47560.1                | 0.199     | 0.146     | 0.07      | -0.105 |
| A021225_01 | At3g46430     | putative protein; protein id: At3g46430.1                | 0.57      | 0.334     | 0.442     | 0.053  |
| A021227_01 | At3g58200     | putative protein; protein id: At3g58200.1                | 1.05      | 0.998     | 1.31      | 1.565  |
| A021230_01 | At3g49580     | putative protein; protein id: At3g49580.1                | -3.173    | -3.875    | -2.59 NA  |        |
| A021233_01 | At3g59540     | 60S RIBOSOMAL PROTEIN L38-like protein; protei           | 0.76      | 0.772     | 0.864     | 0.677  |
| A021234_01 | At3g59600     | putative protein; protein id: At3g59600.1                | -0.051    | -0.123    | 0.255     | 0.195  |
| A021235_01 | At3g55170     | ribosomal protein L35 -like; protein id: At3g55170.1     | 0.757     | 0.759     | 0.632     | 0.254  |
| A021238_01 | At3g59810     | U6 snRNA-associated Sm-like protein; protein id: A       | -0.302    | 0.165     | 0.324     | -0.267 |
| A021239_01 | At1g03430     | putative AHP2; protein id: At1g03430.1                   | -0.445    | -0.391    | -0.092    | 0.005  |
| A021241_01 | At3g54380     | T12E18.70; protein id: At3g54380                         | -0.352    | -0.033    | -0.171    | 0.225  |
| A021249_01 | At1g07610     | metallothionein-like protein; protein id: At1g07610.1    | -2.841    | -3.377    | -2.439    | -2.777 |
| A021252_01 | At3g45030     | 40S ribosomal protein; protein id: At3g45030.1           | 0.606     | 0.544     | 0.437     | 0.917  |
| A021253_01 | At5g15200     | 40S ribosomal protein - like; protein id: At5g15200.1    | 0.895     | 0.636     | 0.788     | 1.516  |
| A021261_01 | At4g36130     | putative ribosomal protein L8; protein id: At4g36130     | 0.814     | 0.518     | 0.521     | 0.815  |
| A021267_01 | At4g27230     | histone H2A- like protein; protein id: At4g27230.1       | 0.51      | 0.288     | 0.51      | 0.255  |
| A021269_01 | At4g26710     | putative protein; protein id: At4g26710.1                |           | NA        | -0.285    | -0.049 |
| A021274_01 | At4g26230     | putative ribosomal protein; protein id: At4g26230.1      | 0.979     | 0.926     | 0.62      | 0.502  |
| A021276_01 | At4g09900     | putative host response protein; protein id: At4g0990     | -0.614    | -0.386    | -0.16     | -0.297 |
| A021293_01 | At4g29770     | expressed protein; protein id: At4g29770.1               | 0.713     | 0.997     | 0.844     | 1.155  |
| A021294_01 | At4g29850     | putative protein; protein id: At4g29850.1                | -0.647    | -0.436    | -0.081    | -0.718 |
| A021295_01 | At4g25690     | hypothetical protein; protein id: At4g25690.1            | -0.541    | -0.619    | -0.571    | -0.713 |
| A021299_01 | At4g29760     | putative protein; protein id: At4g29760.1                | 1.126     | 1.072     | 1.271     | 1.753  |
| A021303_01 | At3g47370     | 40S ribosomal protein S20-like protein; protein id: A    | 0.901     | 0.872     | 0.566     | 0.491  |
| A021309_01 | At4g01060     | myb family transcription factor; protein id: At4g0106    | -2.885 NA |           | -1.396 NA |        |
| A021313_01 | At4g02890     | polyubiquitin (UBQ14); protein id: At4g02890.1           | -0.879    | -1.363    | -0.448    | 0.102  |
| A021323_01 | At4g07950     | putative DNA-directed RNA polymerase subunit; pro        | 0.214 NA  |           | 0.483     | 0.476  |
| A021335_01 | At4g15700     | glutaredoxin homolog; protein id: At4g15700.1            | -1.031 NA |           | NA        | -1.791 |
| A021338_01 | At4g30330     | small nuclear ribonucleoprotein homolog; protein id:     | 1.547     | 1.277     | 1.304     | 1.025  |
| A021339_01 | At5g01610     | putative protein; protein id: At5g01610.1                | -0.699    | -0.602 NA |           | NA     |
| A021340_01 | At3g62400     | cytochrome c oxidase subunit 5c-like protein; protei     | 0.229     | 0.059     | 0.265     | -0.389 |
| A021341_01 | At3g62790     | putative protein; protein id: At3g62790.1                | 0.382     | 0.374     | 0.409     | 0.193  |
| A021342_01 | At5g04790     | unknown protein; protein id: At5g04790.1                 | 0.006     | -0.026    | -0.062    | -0.106 |
| A021344_01 | At5g07090     | 40S ribosomal protein S4; protein id: At5g07090.1        | 0.821     | 0.733 NA  |           | 0.808  |
| A021347_01 | At5g07580     | transcription factor-like protein (emb CAB87947.1)       | -0.916    | -0.786    | -0.167    | -0.635 |
| A021354_01 | At3g28080     | expressed protein; protein id: At3g28080.1               | -0.957    | -1.084 NA |           | NA     |
| A021368_01 | At3g17440     | expressed protein; protein id: At3g17440.1               | -0.124    | -0.136    | -0.416    | -0.179 |
| A021372_01 | At3g19980     | protein phosphatase; protein id: At3g19980.1             | -0.38     | -0.451    | -0.27     | -0.14  |
| A021375_01 | At5g10980     | histone H3 protein                                       | -0.689    | -0.723    | -0.278    | -0.334 |
| A021377_01 | At3g26860     | putative self-incompatibility protein; protein id: At3g; | -0.572    | -0.664 NA |           | NA     |
| A021389_01 | At3g18740     | 60S ribosomal protein, putative; protein id: At3g187     | 0.922     | 0.674     | 0.995     | 1.493  |
| A021392_01 | At5g16450     | expressed protein; protein id: At5g16450.1               | -0.036    | -0.243    | 0.186     | 0.059  |
| A021395_01 | At5g42990     | ubiquitin-conjugating enzyme-like protein                | -0.301    | -0.447    | 0.084     | 0.071  |
| A021401_01 | At3g15060     | ras family GTP-binding protein, putative; protein id:    | 0.267     | 0.115     | -0.185    | -0.458 |
| A021411_01 | At5g18020     | auxin-induced protein-like; protein id: At5g18020.1      | 0.553     | 0.691     | 0.508     | 0.256  |
| A021413_01 | At5g18040     | putative protein; protein id: At5g18040.1                | -0.293    | -0.511    | -0.237    | -0.306 |
| A021419_01 | At5g24660     | putative protein; protein id: At5g24660.1                | -2.234    | -2.421    | -1.156    | -2.633 |
| A021427_01 | At5g54760     | protein translation factor Sui1 homolog (sp P41568)      | -0.094    | -0.411    | 0.036     | -0.077 |
| A021428_01 | At5g05670     | signal recognition particle receptor beta subunit-like   | 0.53 NA   |           | 0.649     | 0.469  |
| A021434_01 | At5g45750     | putative Rab-type small GTP-binding protein              | 1.002     | 1.292     | 0.578     | 0.673  |
| A021438_01 | At5g36790     | p-nitrophenylphosphatase-like protein; protein id: At    | -0.705    | -0.623    | -0.384    | -0.563 |
| A021440_01 | At3g16100     | GTP-binding protein, putative; protein id: At3g16100     | 0.372     | 0.51      | 0.367     | 0.409  |
| A021441_01 | At5g59840     | GTP-binding protein ara-3; protein id: At5g59840.1       | -1.126    | -0.918    | -0.736    | -0.798 |

|            |                |                                                         |        |        |        |        |
|------------|----------------|---------------------------------------------------------|--------|--------|--------|--------|
| A021444_01 | At5g59910      | histone H2B - like protein; protein id: At5g59910.1     | 0.299  | 0.413  | 0.55   | 0.675  |
| A021451_01 | At5g51620      | unknown protein; protein id: At5g51620.1                | -0.35  | -0.259 | -0.242 | -0.178 |
| A021454_01 | At5g40080      | putative protein; protein id: At5g40080.1               | 0.443  | 0.57   | 0.772  | 0.405  |
| A021462_01 | At5g05040      | putative protein; protein id: At5g05040.1               | -0.075 | 0.102  | 0.212  | -0.269 |
| A021464_01 | At5g62720      | putative protein; protein id: At5g62720.1               | -0.12  | 0.103  | 0.18   | -0.322 |
| A021466_01 | At5g38760      | pollen coat -like protein; protein id: At5g38760.1      | -0.841 | -0.644 | -0.869 | -1.778 |
| A021467_01 | At5g66550      | putative protein; protein id: At5g66550.1               | 0.593  | 1.032  | 0.346  | 0.382  |
| A021472_01 | At5g43640      | 40S ribosomal protein S15; protein id: At5g43640.1      | 0.487  | 0.838  | 0.634  | 0.324  |
| A021474_01 | At5g38650      | putative protein; protein id: At5g38650.1               | -0.28  | -0.17  | 0.005  | -0.332 |
| A021476_01 | At5g05590      | phosphoribosylanthranilate isomerase; protein id: A     | 0.589  | 0.466  | 0.467  | 0.62   |
| A021491_01 | At5g05370      | ubiquinol-cytochrome C reductase complex ubiquin        | 0.277  | 0.388  | 0.629  | 0.285  |
| A021492_01 | At5g45010      | putative protein; protein id: At5g45010.1               | -0.257 | 0.264  | 0.254  | -0.318 |
| A021494_01 | At5g40130      | 60S RIBOSOMAL PROTEIN L5 -like; protein id: At5         | 0.751  | 0.748  | 0.708  | 0.804  |
| A021497_01 | At5g56670      | 40S ribosomal protein S30 homolog (emb CAB7969          | 1.048  | 1.013  | 1.059  | 0.681  |
| A021498_01 | At5g39800      | expressed protein; protein id: At5g39800.1              | 0.501  | 0.73   | 0.806  | 0.26   |
| A021500_01 | At5g47700      | 60S acidic ribosomal protein P1-like protein; protein   | 0.7    | 0.674  | 0.649  | 0.708  |
| A021510_01 | At5g58420      | ribosomal protein S4 - like; protein id: At5g58420.1    | 0.759  | 0.77   | 0.997  | 1.338  |
| A021511_01 | At5g65060      | MADS-box protein; protein id: At5g65060.1               | -0.108 | -0.088 | 0.229  | 0.039  |
| A021517_01 | At5g09510      | ribosomal protein S15-like; protein id: At5g09510.1     | 0.817  | 0.61   | 0.517  | 0.437  |
| A021520_01 | At2g02390      | glutathione transferase, putative; protein id: At2g02   | -1.868 | -2.105 | -0.774 | -1.191 |
| A021521_01 | At3g14310      | putative pectin methylesterase; protein id: At3g1431    | 0.485  | 0.478  | -0.34  | -0.318 |
| A021526_01 | At1g22840      | putative cytochrome C; protein id: At1g22840.1          | 0.32   | 0.297  | 0.433  | 0.657  |
| A021528_01 | At2g44290      | unknown protein; protein id: At2g44290.1                | -0.178 | -0.109 | -0.822 | -1.387 |
| A021529_01 | not annotatetd | Chr3 C/10728051-10728120                                | -0.858 | -0.921 | -0.257 | -0.718 |
| A021538_01 | At1g75440      | E2, ubiquitin-conjugating enzyme 16 (UBC16); prote      | -1.027 | -0.729 | NA     | -0.764 |
| A021539_01 | At1g29410      | phosphoribosylanthranilate isomerase; protein id: A     | 0.371  | 0.717  | 0.371  | 0.768  |
| A021542_01 | At1g54690      | histone H2A, putative; protein id: At1g54690.1          | 0.881  | 0.852  | 0.268  | 0.365  |
| A021546_01 | At5g25120      | cytochrome p450 family; protein id: At5g25120.1         | NA     | NA     | NA     | NA     |
| A021549_01 | At1g26910      | putative 60s ribosomal protein L10; protein id: At1g    | 0.408  | 0.312  | 0.691  | 0.848  |
| A021551_01 | At1g04470      | unknown protein; protein id: At1g04470.1                | 0.983  | 1.269  | 0.632  | 0.647  |
| A021552_01 | At1g04410      | putative malate dehydrogenase; protein id: At1g044      | 0.035  | 0.026  | -0.121 | 0.026  |
| A021557_01 | At1g51250      | unknown protein; protein id: At1g51250.1                | -0.612 | -0.481 | NA     | NA     |
| A021560_01 | At1g16430      | expressed protein; protein id: At1g16430.1              | 0.635  | 0.585  | 0.581  | 0.292  |
| A021562_01 | At1g13990      | expressed protein; protein id: At1g13990.1              | -2.978 | NA     | -1.219 | -3.4   |
| A021563_01 | At1g14010      | unknown protein; protein id: At1g14010.1                | 0.573  | 0.709  | 0.444  | 0.394  |
| A021565_01 | At3g46560      | small zinc finger-like protein TIM9; protein id: At3g4  | 0.861  | 0.894  | 1.102  | 0.928  |
| A021567_01 | At1g21770      | expressed protein; protein id: At1g21770.1              | -0.501 | -0.408 | -0.138 | -0.928 |
| A021568_01 | At1g68650      | transmembrane protein, putative; protein id: At1g68     | 0.431  | 0.094  | 0.112  | -0.048 |
| A021577_01 | At1g01100      | acidic ribosomal protein, putative; protein id: At1g01  | 0.78   | 0.664  | 0.831  | 0.644  |
| A021580_01 | At2g43810      | putative small nuclear ribonucleoprotein polypeptide    | 0.308  | 0.459  | 0.368  | 0.022  |
| A021585_01 | At2g18990      | putative ATP binding protein; protein id: At2g18990.    | 1.159  | 1.005  | 0.989  | 0.969  |
| A021587_01 | At2g42190      | expressed protein; protein id: At2g42190.1              | -0.069 | -0.156 | 0.099  | -0.209 |
| A021589_01 | At2g26750      | putative epoxide hydrolase; protein id: At2g26750.1     | -0.803 | -0.821 | -0.638 | -1.155 |
| A021592_01 | At2g29300      | putative tropinone reductase; protein id: At2g29300. NA |        | -1.031 | NA     | NA     |
| A021593_01 | At2g29310      | putative tropinone reductase; protein id: At2g29310.    | 1.106  | 1.365  | 0.175  | 0.274  |
| A021594_01 | At2g29320      | putative tropinone reductase; protein id: At2g29320.    | -1.45  | -1.503 | -1.106 | -1.233 |
| A021595_01 | At2g29370      | putative tropinone reductase; protein id: At2g29370. NA | NA     | NA     |        | -2.182 |
| A021601_01 | At2g37600      | 60S ribosomal protein L36; protein id: At2g37600.1      | 1.064  | 0.619  | 0.808  | NA     |
| A021607_01 | At2g24040      | unknown protein; protein id: At2g24040.1                | -1.502 | -1.031 | -0.654 | -1.403 |
| A021613_01 | At2g28740      | histone H4; protein id: At2g28740.1                     | 1.373  | 1.157  | 1.033  | 0.858  |
| A021615_01 | At2g16830      | unknown protein; protein id: At2g16830.1                | -0.138 | -0.037 | NA     | -0.416 |
| A021616_01 | At2g28020      | unknown protein; protein id: At2g28020.1                | 0.207  | 0.007  | 0.293  | 0.363  |
| A021619_01 | At2g24190      | putative carbonyl reductase; protein id: At2g24190.     | 0.201  | NA     | -0.037 | 0.156  |
| A021628_01 | At2g32190      | expressed protein; protein id: At2g32190.1              | -1.692 | -1.662 | -1.06  | -1.944 |
| A021629_01 | At2g32210      | expressed protein; protein id: At2g32210.1              | -2.482 | -1.719 | -1.279 | -2.118 |
| A021635_01 | At2g09970      | unknown protein; protein id: At2g09970.1                | NA     | -1.553 | NA     | NA     |
| A021636_01 | At2g21260      | mannose 6-phosphate reductase (NADPH-depende            | 0.085  | 0.156  | 0.183  | 0.487  |
| A021638_01 | At2g04630      | putative DNA-directed RNA polymerase II subunit; p      | 0.098  | -0.011 | 0.142  | -0.318 |
| A021640_01 | At2g35810      | expressed protein; protein id: At2g35810.1              | -0.275 | -0.278 | -0.013 | -0.348 |
| A021641_01 | At2g05310      | expressed protein; protein id: At2g05310.1              | -0.629 | -0.858 | -0.544 | -1.318 |
| A021643_01 | At2g21750      | hypothetical protein; protein id: At2g21750.1           | -0.612 | 0.34   | -0.267 | -0.178 |
| A021647_01 | At2g20450      | 60S ribosomal protein L14; protein id: At2g20450.1      | 0.7    | 0.852  | 0.777  | 0.568  |
| A021648_01 | At2g20530      | putative prohibitin; protein id: At2g20530.1            | 0.265  | 0.295  | 0.058  | -0.009 |
| A021652_01 | At2g16510      | putative vacuolar proton-ATPase 16 kDa proteolipid      | -0.09  | -0.07  | 0.075  | -0.067 |
| A021659_01 | At2g07640      | unknown protein; protein id: At2g07640.1                | -0.789 | -0.494 | NA     | -0.573 |
| A021661_01 | At1g18250      | pathogenesis-related group 5 protein, putative; prot    | -0.111 | NA     | NA     | NA     |
| A021662_01 | At1g62610      | similar to glucose 1-dehydrogenase (AB000617); sii      | 0.6    | 0.493  | 0.639  | 0.92   |
| A021670_01 | At1g13990      | expressed protein; protein id: At1g13990.1              | -2.713 | NA     | -1.882 | -3.636 |

|            |           |                                                           |        |        |        |        |
|------------|-----------|-----------------------------------------------------------|--------|--------|--------|--------|
| A021673_01 | At1g12390 | hypothetical protein; protein id: At1g12390.1             | -0.041 | NA     | 0.033  | -0.351 |
| A021677_01 | At1g20140 | SKP1/ASK1 (At4), putative; protein id: At1g20140.1        | 0.525  | 0.455  | 0.701  | 0.14   |
| A021682_01 | At1g20580 | expressed protein; protein id: At1g20580.1                | 0.43   | 0.327  | 0.417  | 0.332  |
| A021691_01 | At1g09490 | putative cinnamyl alcohol dehydrogenase; protein ic       | -0.402 | -0.53  | -0.881 | -0.899 |
| A021696_01 | At1g29250 | expressed protein; protein id: At1g29250.1                | 0.869  | 0.876  | 0.934  | 0.947  |
| A021697_01 | At1g17410 | unknown protein; protein id: At1g17410.1                  | -0.148 | -0.036 | 0.285  | -0.261 |
| A021700_01 | At1g27330 | unknown protein; protein id: At1g27330.1                  | 0.256  | 0.382  | 0.478  | 0.274  |
| A021701_01 | At1g27400 | putative 60S ribosomal protein L17; protein id: At1g      | 1.037  | 0.747  | 0.686  | 1.607  |
| A021703_01 | At1g47820 | expressed protein; protein id: At1g47820.1                | 0.361  | 0.523  | 0.408  | 0.095  |
| A021708_01 | At1g12250 | chloroplast lumen pentapeptide protein, putative; pr      | -0.427 | NA     | -0.57  | -1.197 |
| A021709_01 | At1g49660 | unknown protein; protein id: At1g49660.1                  | -1.563 | NA     | NA     |        |
| A021712_01 | At1g3135  | pseudogene, putative 60s ribosomal protein; proteir       | 1.377  | 0.775  | 0.885  | 1.329  |
| A021718_01 | At1g52250 | dynein light chain, putative; protein id: At1g52250.1     | 0.046  | NA     | 0.795  | -0.066 |
| A021719_01 | At2g01890 | putative purple acid phosphatase; protein id: At2g01      | -3.635 | NA     | NA     |        |
| A021724_01 | At1g65345 | pseudogene, putative polyubiquitin; protein id: At1g      | -1.26  | -0.676 | -0.581 | -0.534 |
| A021726_01 | At1g07070 | ribosomal protein, putative; protein id: At1g07070.1      | 1.087  | 1.052  | 0.921  | 0.941  |
| A021730_01 | At3g06680 | ribosomal protein L29, putative; protein id: At3g0668     | 0.843  | 0.93   | 0.983  | 0.983  |
| A021739_01 | At3g11500 | putative small nuclear ribonucleoprotein polypeptide      | 0.858  | 0.58   | 0.653  | 0.593  |
| A021749_01 | At1g29460 | auxin-induced protein, putative; protein id: At1g2946     | -0.579 | 0.087  | 0.686  | 0.594  |
| A021753_01 | At1g63320 | hypothetical protein; protein id: At1g63320.1             | 0.183  | 0.18   | NA     | 0.421  |
| A021759_01 | At1g70680 | Ca2+-binding EF-hand common family protein, puta          | -2.921 | -3.165 | -2.047 | -2.866 |
| A021760_01 | At1g70670 | Ca2+-binding EF-hand common family protein, puta          | -0.945 | -1.6   | -0.682 | -0.741 |
| A021765_01 | At1g51390 | unknown protein; protein id: At1g51390.1                  | 0.272  | 0.048  | 0.016  | 0.104  |
| A021769_01 | At3g09150 | auxin-regulated protein; protein id: At3g09150.2          | 0.372  | NA     | 0.069  | 0.264  |
| A021771_01 | At3g02190 | putative ribosomal protein L39; protein id: At3g0219      | 0.688  | 0.876  | 0.804  | 0.651  |
| A021772_01 | At3g02770 | expressed protein; protein id: At3g02770.1                | -0.76  | -0.468 | -0.497 | -0.367 |
| A021782_01 | At3g09500 | putative 60S ribosomal protein L35; protein id: At3g      | 0.684  | 0.894  | 0.751  | 0.73   |
| A021785_01 | At4g00810 | acidic ribosomal protein p1; protein id: At4g00810.1      | 0.498  | 0.359  | 0.472  | 0.505  |
| A021786_01 | At1g60480 | pseudogene, putative ADP-ribosylation factor              | 0.246  | 0.147  | 0.391  | 0.303  |
| A021791_01 | At2g32670 | putative synaptobrevin; protein id: At2g32670.1           | 0.05   | -0.17  | -0.172 | -0.156 |
| A021794_01 | At2g02500 | putative sugar nucleotide phosphorylase; protein id:      | 1.276  | 1.393  | 0.547  | 0.795  |
| A021796_01 | At3g05880 | low temperature and salt responsive protein LTI6A;        | -0.553 | -0.772 | -0.77  | -1.612 |
| A021797_01 | At1g75440 | E2, ubiquitin-conjugating enzyme 16 (UBC16); prote        | -0.579 | -0.743 | 0.103  | -0.508 |
| A021799_01 | At5g09770 | ribosomal protein - like; protein id: At5g09770.1         | 0.482  | 0.629  | 0.792  | 0.687  |
| A021802_01 | At4g29410 | putative protein; protein id: At4g29410.1                 | 1.275  | 0.868  | 0.949  | 1.556  |
| A021803_01 | At3g44010 | ribosomal protein S29 - like; protein id: At3g44010.1     | 0.322  | 0.421  | 0.591  | 0.629  |
| A021804_01 | At5g67440 | photoreceptor-interacting protein-like; protein id: At    | -0.403 | -0.36  | 0.133  | 0.149  |
| A021805_01 | At2g46370 | putative auxin-responsive protein; protein id: At2g46     | -0.635 | -0.595 | -0.732 | -0.094 |
| A021807_01 | At4g24130 | putative protein; protein id: At4g24130.1                 | 0.564  | 0.476  | 0.964  | 0.772  |
| A021810_01 | At5g03630 | monodehydroascorbate reductase, putative; protein         | 0.107  | 0.071  | 0.387  | 0.655  |
| A021811_01 | At1g80920 | J8-like protein; protein id: At1g80920.1                  | -2.858 | -2.778 | -1.71  | -1.554 |
| A021812_01 | At4g09460 | myb family transcription factor; protein id: At4g0946 NA  | NA     | NA     | 0.773  | 0.68   |
| A021813_01 | xxxx      | b/t putative serine carboxypeptidase II; protein id: A    | -0.812 | -0.647 | -0.518 | -0.186 |
| A021814_01 | At2g43820 | putative glucosyltransferase; protein id: At2g43820.      | -2.813 | -3.031 | -1.441 | -2.587 |
| A021815_01 | At3g27380 | succinate dehydrogenase iron-protein subunit, puta        | 0.337  | 0.13   | 0.263  | 0.967  |
| A021816_01 | At1g01050 | soluble inorganic pyrophosphatase, putative; proteir NA   |        | 0.141  | NA     | 0.112  |
| A021817_01 | At3g17210 | expressed protein; protein id: At3g17210.1                | 0.282  | 0.216  | -0.038 | -0.688 |
| A021818_01 | At5g20570 | RING-box protein - like; protein id: At5g20570.1          | -0.136 | 0.017  | 0.325  | -0.005 |
| A021820_01 | At3g26280 | cytochrome p450 family; protein id: At3g26280.1           | -3.205 | -2.961 | -2.016 | -3.094 |
| A021821_01 | At2g24940 | putative steroid binding protein; protein id: At2g249     | -0.055 | 0.083  | -0.127 | -0.332 |
| A021822_01 | At1g54630 | expressed protein; protein id: At1g54630.1                | -0.163 | 0.248  | -0.168 | -0.077 |
| A021823_01 | At4g30810 | serine carboxypeptidase II - like protein; protein id: ,  | 0.702  | 0.936  | 0.661  | 0.8    |
| A021827_01 | At4g36860 | putative protein; protein id: At4g36860.1                 | -0.297 | -0.253 | -0.528 | -0.33  |
| A021828_01 | At5g40650 | putative succinate dehydrogenase iron-proteinubuni        | -0.07  | NA     | NA     | -0.124 |
| A021829_01 | At5g10390 | histone H3 - like protein; protein id: At5g10390.1        | 1.54   | 1.015  | 1.085  | 1.248  |
| A021830_01 | At5g34940 | putative protein; protein id: At5g34940.1                 | -0.964 | -1.089 | NA     | 0.379  |
| A021832_01 | At5g56280 | COP9 complex subunit 6 CSN6, putative; protein id         | 0.131  | NA     | 0.118  | 0.236  |
| A021833_01 | At5g57290 | 60S acidic ribosomal protein P3; protein id: At5g572      | -0.551 | NA     | 0.086  | NA     |
| A021835_01 | At5g49650 | putative xylulose kinase; protein id: At5g49650           | -0.242 | -0.511 | -0.508 | -0.346 |
| A021838_01 | At5g09850 | unknown protein                                           | 0.11   | 0.428  | 0.329  | 0.976  |
| A021839_01 | At2g26190 | expressed protein; protein id: At2g26190.1                | -0.62  | NA     | NA     | -0.437 |
| A021840_01 | At4g14340 | casein kinase I; protein id: At4g14340.1                  | -0.08  | -0.057 | NA     | NA     |
| A021842_01 | At1g06690 | expressed protein; protein id: At1g06690.1                | 0.389  | 0.311  | -0.226 | 0.125  |
| A021843_01 | At5g65110 | acyl-CoA oxidase (gb AAC13497.1); protein id: At5c        | -1.042 | -1.085 | -0.81  | -0.332 |
| A021845_01 | At5g16450 | expressed protein; protein id: At5g16450.1                | 0.02   | -0.052 | 0.39   | 0.35   |
| A021846_01 | At3g27830 | 50S ribosomal protein L12-A; protein id: At3g27830        | 0.416  | 0.168  | 0.255  | -0.02  |
| A021848_01 | At1g02880 | thiamin pyrophosphokinase, putative; protein id: At1      | -0.423 | NA     | NA     | -0.813 |
| A021850_01 | At1g69410 | eukaryotic initiation factor 5A , putative; protein id: / | -1.337 | -0.995 | -0.679 | -0.913 |



|            |           |                                                                                        |        |        |        |        |
|------------|-----------|----------------------------------------------------------------------------------------|--------|--------|--------|--------|
| A021851_01 | At5g44580 | expressed protein; protein id: At5g44580.1                                             | -2.545 | -2.886 | -1.398 | -2.088 |
| A021853_01 | At1g65980 | type 2 peroxiredoxin, putative; protein id: At1g65980.1                                | 0.093  | 0.067  | 0.479  | 1.044  |
| A021856_01 | At2g32060 | 40S ribosomal protein S12; protein id: At2g32060.1                                     | 0.576  | 0.639  | 0.564  | 0.503  |
| A021857_01 | At5g56710 | 60S ribosomal protein L31; protein id: At5g56710.1                                     | 0.894  | 0.452  | 0.622  | 0.978  |
| A021858_01 | At1g64750 | expressed protein; protein id: At1g64750.1                                             | 0.077  | 0.376  | 0.488  | -0.387 |
| A021859_01 | At1g25230 | hypothetical protein; protein id: At1g25230.1                                          | -0.164 | -0.134 | 0.095  | 0.154  |
| A021860_01 | At1g10660 | unknown protein; protein id: At1g10660.1                                               | -0.214 | -0.342 | -0.402 | 0.227  |
| A021864_01 | At1g27150 | expressed protein; protein id: At1g27150.1                                             | 0.09   | 0.123  | 0.295  | 0.694  |
| A021865_01 | At5g14590 | isocitrate dehydrogenase - like protein; protein id: A                                 | -0.011 | 0.157  | 0.211  | 0.921  |
| A021866_01 | At5g55160 | ubiquitin-like protein SMT3-like; protein id: At5g55160.1                              | -0.247 | -0.075 | 0.259  | -0.088 |
| A021867_01 | At2g40110 | unknown protein; protein id: At2g40110.1                                               | -1.088 | -1.117 | -0.401 | -0.953 |
| A021868_01 | At3g53990 | expressed protein; protein id: At3g53990.1                                             | -0.47  | -0.387 | -0.238 | NA     |
| A021870_01 | At4g37020 | putative protein; protein id: At4g37020.1                                              | 0.235  | 0.331  | 0.221  | 0.403  |
| A021873_01 | At5g18630 | triacylglycerol lipase-like protein; protein id: At5g18630.1                           | -1.514 | -1.961 | -1.487 | -1.463 |
| A021874_01 | At3g19800 | expressed protein; protein id: At3g19800.1                                             | -1.5   | -1.441 | -1.345 | -1.219 |
| A021876_01 | At3g18440 | unknown protein; protein id: At3g18440.1                                               | -0.009 | 0.172  | NA     | -0.026 |
| A021878_01 | At5g47660 | putative protein; protein id: At5g47660.1                                              | 0.17   | 0.316  | NA     | 0.271  |
| A021882_01 | At5g14180 | putative protein; protein id: At5g14180.1                                              | NA     | NA     | -1.237 | -1.269 |
| A021884_01 | At1g23290 | 60s ribosomal protein l27a.; protein id: At1g23290.1                                   | 0.947  | 0.907  | 1.09   | 0.827  |
| A021885_01 | At5g17190 | putative protein; protein id: At5g17190.1                                              | 0.221  | 0.19   | 0.195  | 0.119  |
| A021888_01 | At2g44300 | unknown protein; protein id: At2g44300.1                                               | 0.417  | 0.4    | 0.194  | -0.137 |
| A021889_01 | At5g02610 | ribosomal protein L35 - like; protein id: At5g02610.1                                  | 0.452  | 0.681  | 0.615  | 0.568  |
| A021890_01 | At4g11360 | RING-H2 finger protein RHA1b; protein id: At4g11360.1                                  | -2.281 | -2.058 | -0.816 | -1.891 |
| A021891_01 | At4g14320 | ribosomal protein; protein id: At4g14320.1                                             | 0.859  | 0.697  | 0.669  | 0.721  |
| A021893_01 | At4g04830 | putative protein; protein id: At4g04830.1                                              | -2.29  | -2.301 | -1.76  | -2.852 |
| A021894_01 | At2g47490 | mitochondrial carrier protein family; protein id: At2g47490.1                          | -1.065 | -0.215 | -0.295 | 0.078  |
| A021895_01 | At3g43810 | calmodulin 7; protein id: At3g43810.1                                                  | 0.225  | 0.131  | 0.203  | 0.07   |
| A021897_01 | At1g10630 | ADP-ribosylation factor, putative; protein id: At1g10630.1                             | 0.482  | 0.564  | 0.445  | 0.474  |
| A021898_01 | At1g63840 | putative RING zinc finger protein; protein id: At1g63840.1                             | -0.435 | -0.381 | 0.19   | 0.289  |
| A021899_01 | At2g18670 | putative RING zinc finger protein; protein id: At2g18670.1                             | 0.336  | NA     | NA     | NA     |
| A021900_01 | At4g08460 | hypothetical protein; protein id: At4g08460.1                                          | 0.196  | 0.226  | NA     | -0.013 |
| A021901_01 | At5g15960 | cold and ABA inducible protein kin1; protein id: At5g15960.1                           | 0.616  | 0.53   | 0.553  | 0.082  |
| A021903_01 | At3g61640 | arabinogalactan-protein (AGP20); protein id: At3g61640.1                               | 0.928  | 0.934  | 0.288  | -0.219 |
| A021905_01 | At3g53740 | 60S RIBOSOMAL PROTEIN L36 homolog; protein id: At3g53740.1                             | 0.382  | 0.608  | 0.522  | 0.531  |
| A021906_01 | At5g57840 | N-hydroxycinnamoyl/benzoyltransferase; protein id: At5g57840.1                         | -0.381 | -0.158 | NA     | NA     |
| A021907_01 | At1g72510 | arabinogalactan-protein (AGP20); protein id: At3g61640.1                               | -1.403 | -1.523 | -0.908 | -1.06  |
| A021908_01 | At1g09200 | expressed protein; protein id: At1g09200.1                                             | 1.531  | 1.035  | 0.815  | 1.374  |
| A021909_01 | At1g57860 | 60S ribosomal protein L21, putative; protein id: At1g57860.1                           | 0.599  | 0.596  | 0.635  | 0.215  |
| A021913_01 | xxxx      | b/t pseudogene, putative retroelement pol polyprotein; protein id: At1g57860.1         | -2.437 | -2.193 | -1.464 | NA     |
| A021915_01 | At2g32040 | expressed protein; protein id: At2g32040.1                                             | -0.082 | -0.274 | NA     | -0.013 |
| A021916_01 | At3g15350 | N-acetylglucosaminyltransferase family (Core-2/I-Br) member 1; protein id: At3g15350.1 | -0.407 | -0.246 | 0.019  | 0.607  |
| A021920_01 | At5g63330 | putative protein; protein id: At5g63330.1                                              | -0.746 | NA     | NA     | -0.769 |
| A021921_01 | At4g38540 | monooxygenase 2 (MO2); protein id: At4g38540.1                                         | -3.26  | NA     | NA     | NA     |
| A021922_01 | At1g10500 | unknown protein; protein id: At1g10500.1                                               | -1.256 | -1.255 | -0.842 | -1.205 |
| A021924_01 | At5g37690 | putative protein; protein id: At5g37690.1                                              | -0.173 | 0.757  | -0.152 | 0.135  |
| A021926_01 | At3g15350 | N-acetylglucosaminyltransferase family (Core-2/I-Br) member 1; protein id: At3g15350.1 | -0.361 | -0.211 | -0.05  | 0.566  |
| A021927_01 | At1g03210 | unknown protein; protein id: At1g03210.1                                               | -0.362 | -0.151 | 0.079  | 0.423  |
| A021928_01 | At2g26190 | expressed protein; protein id: At2g26190.1                                             | -0.577 | -0.176 | -0.569 | -0.457 |
| A021929_01 | At3g58760 | putative protein; protein id: At3g58760.1                                              | -0.351 | -0.377 | -0.489 | -0.124 |
| A021930_01 | At3g46320 | F12M12.3; pseudogene, putative histone H4-like protein; protein id: At3g46320.1        | 1.409  | 0.97   | 0.96   | 1.063  |
| A021931_01 | At3g14600 | putative 60S ribosomal protein L18A; protein id: At3g14600.1                           | 1.078  | 0.85   | 0.993  | 1.283  |
| A021932_01 | At5g03850 | ribosomal protein S28- like; protein id: At5g03850.1                                   | 0.393  | 0.465  | 0.597  | 0.829  |
| A021933_01 | At2g19750 | 40S ribosomal protein S30; protein id: At2g19750.1                                     | 0.605  | 0.466  | 0.758  | 0.146  |
| A021934_01 | At5g15970 | cold-regulated protein COR6.6 (KIN2); protein id: At5g15970.1                          | 0.174  | 0.188  | 0.63   | -0.22  |
| A021935_01 | At3g29350 | ATHP2, putative; protein id: At3g29350.1                                               | -0.145 | NA     | -0.092 | -0.581 |
| A021937_01 | At1g14870 | unknown protein; protein id: At1g14870.1                                               | -1.098 | -1.189 | -0.401 | -1.369 |
| A021938_01 | At1g26880 | 60s ribosomal protein L34; protein id: At1g26880.1                                     | 0.715  | 0.77   | 0.81   | 1.044  |
| A021939_01 | At5g15520 | 40S RIBOSOMAL PROTEIN S19 - like; protein id: At5g15520.1                              | 0.282  | 0.616  | 0.496  | 0.241  |
| A021941_01 | At3g27360 | histone H3, putative; protein id: At3g27360.1                                          | 1.724  | 1.526  | 1.492  | 1.985  |
| A021942_01 | At1g13990 | expressed protein; protein id: At1g13990.1                                             | -3.064 | -2.905 | -1.591 | -3.266 |
| A021946_01 | At5g64650 | 50S ribosomal protein L17; protein id: At5g64650.1                                     | 0.646  | 0.694  | 0.716  | 0.226  |
| A021948_01 | At4g02710 | unknown protein; protein id: At4g02710.1                                               | -0.208 | -0.279 | NA     | -0.07  |
| A021949_01 | At1g14850 | nucleoporin, putative; protein id: At1g14850.1                                         | 0.821  | 0.873  | 0.681  | 0.769  |
| A021950_01 | At3g53430 | 60S RIBOSOMAL PROTEIN L12 -like; protein id: At3g53430.1                               | 0.461  | 0.274  | 0.53   | 0.806  |
| A021951_01 | At1g34130 | integral membrane protein, putative; protein id: At1g34130.1                           | 0.867  | 0.827  | 0.361  | 0.605  |
| A021954_01 | At2g05380 | expressed protein; protein id: At2g05380.1                                             | NA     | NA     | -0.628 | -2.573 |
| A021955_01 | At1g22270 | expressed protein; protein id: At1g22270.1                                             | 0.604  | 0.875  | 0.761  | 0.544  |
| A021956_01 | At1g73030 | expressed protein; protein id: At1g73030.1                                             | -0.412 | -0.533 | -0.482 | -0.619 |

|            |           |                                                                                     |        |        |        |        |
|------------|-----------|-------------------------------------------------------------------------------------|--------|--------|--------|--------|
| A021958_01 | At3g56800 | calmodulin-3; protein id: At3g56800.1                                               | -0.211 | -0.187 | -0.348 | -0.345 |
| A021959_01 | At5g50600 | 11-beta-hydroxysteroid dehydrogenase-like; protein NA                               | NA     | NA     | NA     |        |
| A021961_01 | At2g36170 | ubiquitin extension protein (UBQ2); protein id: At2g36170.1                         | 0.802  | 0.802  | 0.883  | 1.044  |
| A021962_01 | At1g66410 | calmodulin-4; protein id: At1g66410.1                                               | 0.236  | 0.1    | 0.006  | 0.094  |
| A021963_01 | At4g23010 | putative protein; protein id: At4g23010.1                                           | 0.105  | 0.227  | 0.075  | 0.125  |
| A021966_01 | At3g43810 | calmodulin 7; protein id: At3g43810.1                                               | 1.18   | 0.847  | 0.688  | 0.634  |
| A021968_01 | At3g53990 | expressed protein; protein id: At3g53990.1                                          | -0.757 | -0.784 | -0.609 | -0.757 |
| A021969_01 | At5g55940 | expressed protein; protein id: At5g55940.1                                          | 0.31   | 0.523  | 0.362  | 0.38   |
| A021970_01 | At3g13720 | expressed protein; protein id: At3g13720.1                                          | -0.714 | NA     | 0.102  | -0.577 |
| A021971_01 | At5g35530 | 40S ribosomal protein S3; protein id: At5g35530.1                                   | 0.575  | 0.281  | 0.518  | 0.957  |
| A021976_01 | At1g62080 | expressed protein; protein id: At1g62080.1                                          | -3.59  | -3.979 | NA     | NA     |
| A021978_01 | At1g08630 | expressed protein; protein id: At1g08630.1                                          | -1.236 | -0.612 | -0.047 | 0.094  |
| A021979_01 | At4g27150 | NWMU2 - 2S albumin 2 precursor; protein id: At4g27150.1                             | -2.695 | -2.862 | -1.231 | -3.351 |
| A021980_01 | At1g52540 | somatic embryogenesis receptor-like kinase, putative; protein id: At1g52540.1       | -0.112 | -0.131 | 0.387  | 0.829  |
| A021981_01 | At4g05590 | putative protein; protein id: At4g05590.1                                           | -0.776 | 0.446  | NA     | 0.262  |
| A021982_01 | At2g44120 | 60S ribosomal protein L7; protein id: At2g44120.2                                   | 0.984  | 0.905  | 0.976  | 1.163  |
| A021983_01 | At5g63410 | leucine-rich repeat transmembrane protein kinase, putative; protein id: At5g63410.1 | 0.578  | 0.226  | 0.637  | 1.357  |
| A021984_01 | At4g25050 | acyl carrier - like protein; protein id: At4g25050.1                                | 0.526  | 0.441  | -0.033 | -0.527 |
| A021986_01 | At3g61110 | ribosomal protein S27; protein id: At3g61110.1                                      | 0.256  | 0.337  | 0.383  | 0.428  |
| A021988_01 | At2g35830 | expressed protein; protein id: At2g35830.1                                          | -0.843 | -0.732 | -0.327 | -0.67  |
| A021989_01 | At4g21090 | adrenodoxin - like protein; protein id: At4g21090.1                                 | 0.134  | 0.256  | 0.075  | 0.102  |
| A021990_01 | At1g72030 | unknown protein; protein id: At1g72030.1                                            | -0.998 | NA     | NA     | NA     |
| A021992_01 | At2g27710 | 60S acidic ribosomal protein P2; protein id: At2g27710.1                            | 1.012  | 0.834  | 0.661  | 0.648  |
| A021993_01 | At4g21980 | AtAPG8a; symbiosis-related like protein; protein id: At4g21980.1                    | -1.899 | -1.82  | -0.826 | -0.92  |
| A021994_01 | At1g74060 | putative 60S ribosomal protein L6; protein id: At1g74060.1                          | 0.596  | 0.315  | 0.571  | 1.167  |
| A021995_01 | At3g48570 | expressed protein; protein id: At3g48570.1                                          | 0.09   | 0.476  | 0.506  | -0.085 |
| A021997_01 | At5g16130 | 40S ribosomal protein S7-like; protein id: At5g16130.1                              | 0.819  | 0.905  | 0.712  | 1.324  |
| A021998_01 | At2g02100 | plant defensin protein, putative (PDF2.2); protein id: At2g02100.1                  | 1.458  | 0.732  | 1.011  | 2.275  |
| A021999_01 | At4g18800 | ras-related GTP binding protein, putative; protein id: At4g18800.1                  | -0.295 | -0.223 | 0.26   | 0.319  |
| A022000_01 | At5g56540 | arabinogalactan-protein (AGP14); protein id: At5g56540.1                            | -1.899 | -2.024 | 0.027  | -1.06  |
| A022001_01 | At1g62000 | hypothetical protein; protein id: At1g62000.1                                       | -3.481 | -3.693 | -1.738 | NA     |
| A022003_01 | At1g08880 | putative histone H2A; protein id: At1g08880.1                                       | 0.262  | 0.511  | 0.738  | 0.202  |
| A022005_01 | At1g16700 | NADH:ubiquinone oxidoreductase, putative; protein id: At1g16700.1                   | 0.036  | -0.166 | 0.17   | -0.088 |
| A022006_01 | At1g65970 | type 2 peroxiredoxin, putative; protein id: At1g65970.1                             | -0.54  | -0.344 | -0.162 | 0.158  |
| A022009_01 | At3g23390 | putative ribosomal protein; protein id: At3g23390.1                                 | 1.001  | 0.685  | 0.819  | 1.097  |
| A022010_01 | At4g18100 | ribosomal protein L32 -like protein; protein id: At4g18100.1                        | 1.029  | 0.948  | 0.947  | 1.363  |
| A022011_01 | At3g46030 | histone H2B -like protein; protein id: At3g46030.1                                  | 0.547  | 0.38   | 0.344  | 0.161  |
| A022013_01 | At5g59150 | ras-related GTP-binding protein, putative; protein id: At5g59150.1                  | -0.644 | -0.689 | -0.413 | -0.43  |
| A022014_01 | At3g45980 | histone H2B; protein id: At3g45980.1                                                | 0.492  | 0.544  | 0.454  | 0.179  |
| A022015_01 | At5g56150 | E2, ubiquitin-conjugating enzyme, putative; protein id: At5g56150.1                 | -1.28  | -1.216 | -0.644 | -0.949 |
| A022018_01 | At3g52580 | putative ribosomal protein S14; protein id: At3g52580.1                             | 0.721  | 0.619  | 0.692  | 0.912  |
| A022019_01 | At3g48690 | putative protein; protein id: At3g48690.1                                           | -1.252 | -0.786 | -0.444 | -1.122 |
| A022020_01 | At1g30230 | elongation factor 1-beta, putative; protein id: At1g30230.1                         | -0.041 | 0.396  | 0.443  | 0.688  |
| A022021_01 | At3g11940 | 40S ribosomal protein S5, putative; protein id: At3g11940.1                         | 0.833  | 0.93   | 0.973  | 1.715  |
| A022022_01 | At3g20510 | unknown protein; protein id: At3g20510.1                                            | 0.632  | 0.474  | 0.45   | 0.176  |
| A022024_01 | At4g11370 | RING-H2 finger protein RHA1a -like protein; protein id: At4g11370.1                 | -0.792 | NA     | -0.42  | NA     |
| A022025_01 | At5g41210 | glutathione transferase, putative; protein id: At5g41210.1                          | -0.175 | -0.08  | 0.196  | 0.051  |
| A022026_01 | At4g15000 | ribosomal protein; protein id: At4g15000.1                                          | 0.77   | 1.043  | 1.014  | 1.061  |
| A022027_01 | At2g35370 | glycine decarboxylase complex H-protein; protein id: At2g35370.1                    | 0.219  | 0.113  | 0.071  | 0.369  |
| A022029_01 | At4g05050 | polyubiquitin UBQ11; protein id: At4g05050.1                                        | -1.494 | -1.553 | -0.701 | -0.342 |
| A022033_01 | At5g15460 | expressed protein; protein id: At5g15460.1                                          | 0.66   | 0.525  | 0.465  | 0.65   |
| A022034_01 | At4g40040 | histone H3; protein id: At4g40040.1                                                 | -0.534 | -0.434 | -0.19  | -0.235 |
| A022038_01 | At1g52600 | signal peptidase subunit, putative; protein id: At1g52600.1                         | 0.12   | -0.091 | 0.052  | -0.013 |
| A022039_01 | At3g26450 | major latex protein (MLP)-related; protein id: At3g26450.1                          | -0.129 | -0.237 | 0.039  | -0.539 |
| A022040_01 | At1g63840 | putative RING zinc finger protein; protein id: At1g63840.1                          | -0.546 | -0.28  | 0.332  | 0.104  |
| A022043_01 | At1g74050 | putative 60S ribosomal protein L6; protein id: At1g74050.1                          | 0.364  | 0.51   | 0.427  | 0.482  |
| A022044_01 | At3g25520 | ribosomal protein, putative; protein id: At3g25520.1                                | 1.141  | 0.751  | 0.667  | 1.191  |
| A022045_01 | At1g78380 | glutathione transferase, putative; protein id: At1g78380.1                          |        | -0.204 | -0.528 | -0.39  |
| A022046_01 | At5g48760 | 60S ribosomal protein L13a; protein id: At5g48760.1                                 | 0.018  | 0.743  | 0.527  | 0.498  |
| A022047_01 | At1g67430 | ribosomal protein, putative; protein id: At1g67430.1                                | 1.26   | 0.774  | 0.954  | NA     |
| A022048_01 | At1g10370 | glutathione transferase, putative; protein id: At1g10370.1                          | 0.585  | 0.598  | 0.469  | 0.306  |
| A022077_01 | At3g28070 | unknown protein; protein id: At3g28070.1                                            | -1.828 | -1.861 | -1.368 | -1.243 |
| A022102_01 | At3g58600 | putative protein; protein id: At3g58600.1                                           | -0.037 | -0.696 | -0.174 | -0.491 |
| A022105_01 | At1g49200 | RING-H2 finger protein RHA3a, putative; protein id: At1g49200.1                     | -2.388 | NA     | NA     | NA     |
| A022107_01 | At4g34670 | Putative S-phase-specific ribosomal protein; protein id: At4g34670.1                | 1.01   | 0.533  | 0.824  | 1.152  |
| A022112_01 | At2g39890 | proline transporter 1; protein id: At2g39890.1                                      | -1.46  | -1.351 | -1.231 | -0.699 |
| A022113_01 | At1g06390 | shaggy-like kinase, putative; protein id: At1g06390.1                               | -0.079 | 0.107  | -0.154 | -0.131 |
| A022117_01 | At3g25800 | protein phosphatase 2A 65 kDa regulatory subunit; protein id: At3g25800.1           | -0.074 | -0.299 | 0.056  | 0.082  |

|            |           |                                                             |           |           |          |        |
|------------|-----------|-------------------------------------------------------------|-----------|-----------|----------|--------|
| A022118_01 | At1g45050 | E2, ubiquitin-conjugating enzyme 15 (UBC15); prote          | -0.733    | -0.402    | -0.198   | -0.259 |
| A022120_01 | At3g08720 | putative ribosomal-protein S6 kinase (ATPK19); pro          | -1.321    | -1.011    | -0.62    | -0.487 |
| A022121_01 | At5g04870 | calcium-dependent protein kinase; protein id: At5g0         | 0.38      | 0.577     | 0.25     | 0.797  |
| A022125_01 | At1g13080 | cytochrome p450 family; protein id: At1g13080.1             | -0.932 NA | NA        |          | -1.052 |
| A022126_01 | At3g23000 | SNF1 related protein kinase (ATSRPK1); protein id:          | -1.821    | -2.045    | -0.308   | -0.749 |
| A022130_01 | At1g59520 | expressed protein; protein id: At1g59520.1                  | 0.051     | -0.048    | 0.16     | 0.209  |
| A022138_01 | At5g07890 | putative protein; protein id: At5g07890.1                   | -0.413    | -0.818    | -0.781   | -0.262 |
| A022140_01 | At5g08010 | putative protein; protein id: At5g08010.1                   | 0.115     | 0.057     | -0.14    | 0.271  |
| A022156_01 | xxxx      | b/t crooked neck-like protein; protein id: At3g51110. NA    |           | -0.787 NA |          | -0.645 |
| A022163_01 | At3g51250 | putative protein; protein id: At3g51250.1                   | -0.218    | -0.427    | 0.272    | 0.592  |
| A022164_01 | At3g51270 | putative protein; protein id: At3g51270.1                   | 0.658     | 0.313     | 0.425    | 0.678  |
| A022171_01 | At3g47000 | glycosyl hydrolase family 3; protein id: At3g47000.1        | -0.457    | -0.338    | -0.137   | 0.226  |
| A022183_01 | At3g45190 | putative protein; protein id: At3g45190.1                   | 0.022     | -0.283    | 0.069    | -0.134 |
| A022196_01 | At3g55460 | arginine/serine-rich protein SCL30; protein id: At3g5       | 0.203     | 0.028     | 0.207    | -0.513 |
| A022202_01 | At3g60450 | putative protein; protein id: At3g60450.1                   | 0.459     | 0.253     | 0.838    | 1.157  |
| A022215_01 | At3g55040 | ln2-1 protein, putative; protein id: At3g55040.1            | -0.034    | 0.09      | -0.062   | -0.385 |
| A022218_01 | At3g63190 | putative protein; protein id: At3g63190.1                   | 0.302     | 0.313     | 0.231 NA |        |
| A022230_01 | At3g50380 | putative protein; protein id: At3g50380.1                   | -0.091    | -0.242 NA |          | 0.134  |
| A022248_01 | At3g12620 | protein phosphatase 2C, putative; protein id: At3g12        | 0.106 NA  | NA        |          | -0.431 |
| A022267_01 | At5g10550 | bromodomain protein - like; protein id: At5g10550.1         | 0.45 NA   |           | 0.483    | 0.517  |
| A022269_01 | At5g10380 | putative protein; protein id: At5g10380.1                   | -0.101    | -0.406    | -0.181   | -0.536 |
| A022275_01 | At5g65700 | leucine-rich repeat transmembrane protein kinase, p         | 0.242     | 0.369     | 0.806    | 0.623  |
| A022279_01 | At4g22150 | putative protein; protein id: At4g22150.1                   | -0.103    | -0.315    | 0.096    | 0.252  |
| A022282_01 | At4g28360 | expressed protein; protein id: At4g28360.1                  | 1.045     | 1.112     | 1.056    | 1.072  |
| A022283_01 | At4g28370 | hypothetical protein; protein id: At4g28370.1               | -0.871    | -1.028 NA | NA       |        |
| A022300_01 | At4g19600 | putative protein; protein id: At4g19600.1                   | 0.369     | -0.076 NA |          | -0.345 |
| A022304_01 | At4g32350 | putative protein; protein id: At4g32350.1                   | -0.672    | -0.673 NA | NA       |        |
| A022306_01 | At4g32320 | ascorbate peroxidase family; protein id: At4g32320.         | -0.893    | -1.065    | -0.731   | -1.31  |
| A022311_01 | At4g17880 | bHLH protein; protein id: At4g17880.1, NA                   | NA        | NA        | -0.189   | 0.276  |
| A022316_01 | At4g17960 | putative protein; protein id: At4g17960.1                   | 0.409     | 0.204     | 0.214    | 0.115  |
| A022324_01 | At4g21930 | putative protein; protein id: At4g21930.1                   | -1.797    | -1.523    | -0.105   | -0.482 |
| A022328_01 | At4g21110 | G10 - like protein; protein id: At4g21110.1                 | -0.214    | -0.234    | 0.095    | 0.089  |
| A022329_01 | At4g21120 | amino acid transport protein AAT1; protein id: At4g2        | NA        | NA        | NA       | NA     |
| A022339_01 | At4g34020 | putative protein; protein id: At4g34020.1 NA                | NA        | NA        | NA       | -0.37  |
| A022358_01 | At4g23260 | putative protein; protein id: At4g23260.1                   | -2.653 NA | NA        | NA       | NA     |
| A022365_01 | At4g34750 | auxin-induced protein-related; protein id: At4g34750        | -0.362    | -0.164    | -0.177   | -0.963 |
| A022367_01 | At4g19670 | putative protein; protein id: At4g19670.1                   | -0.46     | -0.155 NA |          | 0.033  |
| A022377_01 | At4g19860 | putative protein; protein id: At4g19860.1                   | -0.964    | -1.406    | -0.581   | -0.61  |
| A022381_01 | At4g27260 | GH3 like protein; protein id: At4g27260.1                   | -1.674    | -1.693    | -0.406   | -1.314 |
| A022386_01 | At4g31670 | putative protein; protein id: At4g31670.1                   | -0.423    | -0.519 NA |          | -0.595 |
| A022394_01 | At4g21326 | subtilisin-like serine protease; protein id: At4g21326      | -0.397    | -0.123    | 0.03     | -0.264 |
| A022401_01 | At4g23400 | water channel - like protein; protein id: At4g23400.1       | -2.597    | -2.632    | -1.586   | -2.518 |
| A022405_01 | At4g33750 | hypothetical protein; protein id: At4g33750.1               | -0.444    | -0.871 NA |          | -0.59  |
| A022406_01 | At4g33760 | putative aspartate--tRNA ligase; protein id: At4g337        | 0.919     | 0.558     | 0.26     | 0.203  |
| A022410_01 | At4g28715 | similar to myosin heavy chain MYA2 (pir S51824); p          | 0.056 NA  | NA        | NA       |        |
| A022417_01 | At4g24920 | protein transport protein SEC61 gamma subunit -lik          | 0.035     | 0.149     | 0.526    | 0.026  |
| A022434_01 | At4g27690 | putative protein; protein id: At4g27690.1                   | 0.098 NA  |           | 0.119    | 0.209  |
| A022436_01 | At4g37560 | formamidase - like protein; protein id: At4g37560.1         | -2.313    | -2.294    | -1.064   | -1.461 |
| A022444_01 | At4g26260 | putative protein; protein id: At4g26260.1                   | -0.256 NA | NA        |          | -0.911 |
| A022447_01 | At4g25840 | putative protein; protein id: At4g25840.1                   | -0.013    | -0.129    | 0.127    | 0.225  |
| A022451_01 | At4g10050 | lipase-like protein; protein id: At4g10050.1                | 0.251 NA  | NA        |          | 1.037  |
| A022457_01 | At4g11640 | putative protein; protein id: At4g11640.1                   | 0.1 NA    |           | 0.22     | -0.068 |
| A022479_01 | At4g12460 | putative SWH1 protein; protein id: At4g12460.1              | 0.207     | 0.163 NA  |          | -0.111 |
| A022485_01 | At4g11110 | COP1 like protein; protein id: At4g11110.1                  | -0.168 NA | NA        |          | -0.554 |
| A022486_01 | At4g11120 | putative translation elongation factor ts; protein id: A    | 0.857 NA  |           | 0.558    | 1.029  |
| A022488_01 | At4g11160 | translation initiation factor IF-2, putative; protein id: . | 0.214     | 0.076     | 0.141    | 0.124  |
| A022495_01 | At4g11410 | putative protein; protein id: At4g11410.1                   | 0.153 NA  |           | 0.283    | 0.183  |
| A022502_01 | At4g27820 | glycosyl hydrolase family 1; protein id: At4g27820.1        | -0.571    | -0.948    | -0.84    | -1.192 |
| A022509_01 | At4g24490 | geranylgeranyl transferase alpha subunit (RAB gera          | 0.426     | 0.338     | 0.273    | 0.609  |
| A022534_01 | At4g00130 | hypothetical protein; protein id: At4g00130.1               | 0.465     | 0.289     | 0.441    | 0.182  |
| A022541_01 | At4g00970 | similar to receptor kinase; protein id: At4g00970.1         | 0.282     | -0.242    | -0.715   | -0.023 |
| A022543_01 | At4g01430 | unknown protein; protein id: At4g01430.1 NA                 | NA        | NA        | -1.017   | -1.777 |
| A022546_01 | At4g02100 | hypothetical protein; protein id: At4g02100.1               | 0.78      | 0.452     | 0.724    | 0.975  |
| A022551_01 | At4g02630 | putative serine/threonine protein kinase; protein id: .     | -0.427    | -0.358    | -0.083   | -0.099 |
| A022555_01 | At4g02860 | putative protein; protein id: At4g02860.1                   | -1.232    | -1.597    | -0.515   | -0.807 |
| A022556_01 | At4g03070 | putative oxidoreductase; protein id: At4g03070.1            | -0.411    | -0.64     | -0.214   | -0.15  |
| A022560_01 | At4g03470 | putative protein; protein id: At4g03470.1                   | -0.334    | -0.487 NA |          | 0.161  |
| A022565_01 | At4g04260 | putative ES43-like protein; protein id: At4g04260.1         | 0.324     | 0.152     | 0.27     | 0.575  |

|            |           |                                                                |        |    |        |        |        |
|------------|-----------|----------------------------------------------------------------|--------|----|--------|--------|--------|
| A022569_01 | At4g05000 | contains similarity to <i>S. cerevisiae</i> vacuolar protein : | 0.565  | NA | NA     |        | 0.372  |
| A022570_01 | At4g05240 | putative protein; protein id: At4g05240.1                      | -0.021 |    | -0.044 | 0.11   | 0.348  |
| A022571_01 | At4g05330 | putative protein; protein id: At4g05330.1                      | -0.215 |    | -0.433 | -0.376 | -1.042 |
| A022583_01 | At4g07840 | putative transposon protein; protein id: At4g07840.1           | -1.078 |    | -0.482 | -0.549 | -0.315 |
| A022592_01 | At4g09120 | putative protein; protein id: At4g09120.1                      | -0.058 |    | -0.342 | -0.395 | -0.335 |
| A022599_01 | At4g14290 | hypothetical protein; protein id: At4g14290.1                  | -0.013 |    | -0.628 | NA     | NA     |
| A022600_01 | At4g14610 | pseudogene, disease resistance protein (CC-NBS-L               | -0.082 |    | -0.017 | NA     | 0.317  |
| A022619_01 | At4g16630 | DEAD/DEAH box RNA helicase, putative; protein id               | -2.148 | NA | NA     | NA     | NA     |
| A022624_01 | At4g17780 | similar to putative myb-related transcription factor; p        | -1.321 | NA | NA     | NA     | NA     |
| A022627_01 | At4g28580 | putative protein; protein id: At4g28580.1                      | -0.064 |    | -0.634 | -0.438 | -0.577 |
| A022634_01 | At4g37150 | hydroxynitrile lyase like protein; protein id: At4g3715        | -0.517 |    | -0.773 | -0.717 | -0.827 |
| A022635_01 | At4g37220 | cold acclimation protein homolog; protein id: At4g37           | 1.075  |    | 0.907  | 0.525  | 0.578  |
| A022637_01 | At4g37320 | cytochrome p450 family; protein id: At4g37320.1                | -0.621 |    | -0.809 | -0.192 | -1.066 |
| A022643_01 | At5g01570 | putative protein; protein id: At5g01570.1                      | -0.671 |    | -1.015 | -0.896 | -2.139 |
| A022657_01 | At3g45950 | putative protein; protein id: At3g45950.1                      | -0.437 |    | -0.618 | -0.519 | -0.199 |
| A022664_01 | At5g02180 | putative protein; protein id: At5g02180.1                      | -0.249 | NA | NA     |        | -0.32  |
| A022666_01 | At5g02200 | hypothetical protein; protein id: At5g02200.1                  | 0.154  | NA |        | -0.598 | -0.422 |
| A022671_01 | At5g03360 | unknown protein; protein id: At5g03360                         | 0.169  |    | -0.013 | 0.195  | -0.095 |
| A022689_01 | At3g56030 | putative protein; protein id: At3g56030.1                      | -0.259 |    | -0.17  | 0.823  | 0.933  |
| A022702_01 | At3g60930 | putative protein; protein id: At3g60930.1                      | 0.371  |    | 0.492  | 0.741  | 0.523  |
| A022705_01 | At3g18330 | hypothetical protein; protein id: At3g18330.1                  | 0.75   |    | 0.544  | 0.655  | 0.358  |
| A022708_01 | At3g20540 | DNA polymerase, putative; protein id: At3g20540.1              | -0.098 | NA |        | 0.353  | -0.362 |
| A022729_01 | At3g19300 | unknown protein; protein id: At3g19300.1                       |        | NA | NA     | NA     | NA     |
| A022731_01 | At3g32240 | unknown protein; protein id: At3g32240.1                       | 0.167  |    | 0.334  | 0.617  | 0.334  |
| A022735_01 | At3g31390 | hypothetical protein; protein id: At3g31390.1                  | -2.575 | NA |        | -1.64  | -1.776 |
| A022749_01 | At3g20000 | membrane import protein, putative; protein id: At3g2           | 0.73   |    | 0.683  | 0.697  | 0.688  |
| A022755_01 | At3g29100 | SNARE protein AtVTI13; protein id: At3g29100.1                 | 0.028  |    | -0.382 | -0.025 | -0.094 |
| A022764_01 | At3g21910 | hypothetical protein; protein id: At3g21910.1                  | -0.054 | NA | NA     | NA     | NA     |
| A022765_01 | At3g21937 | pseudogene                                                     | -0.352 |    | -0.24  | -0.191 | -0.493 |
| A022779_01 | xxxx      | b/t hypothetical protein At3g22340 and hypothetical            | 0.268  |    | 0.209  | 0.406  | 0.483  |
| A022781_01 | At3g17700 | cyclic nucleotide-binding transporter 1 (CNBT1); p             | -0.858 |    | -0.841 | -0.638 | -1.104 |
| A022790_01 | At5g41370 | DNA excision repair cross-complementing protein; ir            | 0.571  |    | 0.522  | 0.457  | 0.778  |
| A022796_01 | At5g41030 | putative protein; protein id: At5g41030.1                      | -0.481 |    | -0.535 | -0.081 | -0.025 |
| A022801_01 | At3g14870 | hypothetical protein; protein id: At3g14870.1                  | -0.088 | NA | NA     | NA     | NA     |
| A022804_01 | At3g30280 | acyltransferase family; protein id: At3g30280.1                | -0.505 |    | -0.466 | -1.319 | -1.767 |
| A022808_01 | At3g28520 | hypothetical protein; protein id: At3g28520.1                  | -0.898 | NA |        | -0.581 | -1.252 |
| A022817_01 | At5g55310 | DNA topoisomerase I; protein id: At5g55310.1                   | -0.06  |    | -0.602 | NA     | -0.67  |
| A022821_01 | At5g53720 | RRM-containing protein; protein id: At5g53720.1                | 1.928  |    | 1.648  | 1.143  | 2.547  |
| A022839_01 | At5g46130 | putative protein; protein id: At5g46130.1                      | 0.507  |    | -0.002 | 0.003  | 0.394  |
| A022844_01 | At5g43080 | cyclin A3;1; protein id: At5g43080.1                           | 0.874  |    | 0.765  | 0.521  | 0.825  |
| A022850_01 | At5g56040 | leucine-rich repeat transmembrane protein kinase, p            | -0.153 |    | 0.141  | 0.779  | 1.156  |
| A022862_01 | At5g55915 | nucleolar protein-like; protein id: At5g55915.1                | 0.772  |    | 0.635  | 0.763  | 1.547  |
| A022865_01 | At3g16060 | kinesin-like protein TBK5, putative; protein id: At3g1         | 0.654  |    | 0.438  | NA     | 0.971  |
| A022874_01 | At5g46750 | zinc finger protein Glo3-like; protein id: At5g46750.1         | 0.08   |    | -0.33  | -0.003 | 0.091  |
| A022882_01 | At5g58710 | cyclophilin ROC7; protein id: At5g58710.1                      | 1.128  |    | 0.66   | 0.78   | 0.876  |
| A022901_01 | At3g13380 | brassinosteroid receptor kinase, putative; protein id:         | -1.194 |    | -1.22  | NA     | NA     |
| A022911_01 | At5g41685 | expressed protein; protein id: At5g41685.1                     | 0.072  |    | 0.273  | 0.768  | -0.002 |
| A022916_01 | At5g61050 | putative protein; protein id: At5g61050.1                      | 0.004  |    | -0.295 | NA     | NA     |
| A022919_01 | At5g61170 | 40S ribosomal protein S19 - like; protein id: At5g611          | 1.186  |    | 0.98   | 0.928  | 0.734  |
| A022922_01 | At5g22730 | unknown protein; protein id: At5g22730.1                       | 0.143  |    | 0.366  | 0.394  | 0.597  |
| A022927_01 | At5g44290 | cyclin-dependent protein kinase-like protein; protein          | -1.154 |    | -1.357 | -0.925 | -1.15  |
| A022948_01 | At5g43630 | unknown protein; protein id: At5g43630.1                       | -1.598 |    | -1.569 | -0.733 | -0.73  |
| A022952_01 | At5g24360 | putative protein; protein id: At5g24360.1                      | 0.081  |    | 0.219  | 0.242  | 0.414  |
| A022967_01 | At5g49020 | arginine methyltransferase-like protein; protein id: A         | 0.915  |    | 0.848  | 0.922  | 1.407  |
| A022968_01 | At5g49030 | isoleucyl-tRNA synthetase; protein id: At5g49030.1             | 0.676  |    | 0.361  | 0.291  | 0.312  |
| A022972_01 | At5g53010 | calcium-transporting ATPase protein, putative; prote           | 0.121  |    | 0.097  | 0.451  | 1.076  |
| A022975_01 | At5g53050 | unknown protein; protein id: At5g53050.1                       | -0.171 |    | -0.452 | -0.423 | -0.658 |
| A022983_01 | At5g66720 | putative protein; protein id: At5g66720.1                      | -0.097 |    | 0.238  | NA     | 0.022  |
| A022984_01 | At5g66730 | zinc finger protein; protein id: At5g66730.1                   | -0.423 | NA |        | -0.244 | -0.4   |
| A022987_01 | At5g38510 | putative protein; protein id: At5g38510.1                      | -1.475 |    | -0.858 | -1.4   | -1.4   |
| A022990_01 | At5g38590 | putative protein; protein id: At5g38590.1                      | 0.994  |    | 0.851  | 1.24   | 1.812  |
| A022991_01 | At5g38600 | putative protein; protein id: At5g38600.1                      | -0.259 | NA | NA     |        | -0.831 |
| A022993_01 | At5g38660 | putative protein; protein id: At5g38660.1                      | -0.282 |    | -0.415 | -0.495 | -0.547 |
| A022996_01 | At5g38690 | putative protein; protein id: At5g38690.1                      | 0.71   |    | 0.054  | 0.614  | 1.164  |
| A022999_01 | At5g63650 | serine/threonine-protein kinase; protein id: At5g636           | 1.607  |    | 1.193  | 1.06   | 1.391  |
| A023023_01 | At5g22950 | putative protein; protein id: At5g22950.1                      | 0.047  |    | -0.655 | -0.128 | -0.176 |
| A023027_01 | At5g23760 | expressed protein; protein id: At5g23760.1                     | -0.398 |    | -0.563 | 0.171  | -0.205 |
| A023029_01 | At5g23810 | amino acid transporter; protein id: At5g23810.1                | -0.142 |    | -0.21  | -0.175 | -0.76  |

|            |           |                                                                                  |           |           |           |  |        |
|------------|-----------|----------------------------------------------------------------------------------|-----------|-----------|-----------|--|--------|
| A023030_01 | At5g23870 | pectinacylesterase family; protein id: At5g23870.1 NA                            | NA        | NA        |           |  | -1.062 |
| A023035_01 | At5g07790 | putative protein; protein id: At5g07790.1                                        | 0.287     | 0.196 NA  | NA        |  |        |
| A023040_01 | At5g08550 | putative protein; protein id: At5g08550.1                                        | 0.078     | 0.213 NA  | NA        |  |        |
| A023041_01 | At5g08570 | pyruvate kinase; protein id: At5g08570.1                                         | 0.937     | 0.551     | 0.713     |  | 1.105  |
| A023043_01 | At5g08630 | unknown protein; protein id: At5g08630.1                                         | 0.177 NA  | NA        |           |  | -0.666 |
| A023045_01 | At5g24240 | ubiquitin; protein id: At5g24240.1                                               | -0.378    | -0.777    | -0.406    |  | -0.581 |
| A023054_01 | At5g53930 | putative protein; protein id: At5g53930.1                                        | 0.209     | -0.195    | 0.058     |  | 0.813  |
| A023061_01 | At5g63830 | unknown protein; protein id: At5g63830.1                                         | 0.01 NA   | NA        |           |  | 0.475  |
| A023066_01 | At5g12190 | RRM-containing protein; protein id: At5g12190.1                                  | 0.34      | 0.122     | 0.539     |  | 0.227  |
| A023075_01 | At5g39530 | putative protein; protein id: At5g39530.1                                        | 0.191     | -0.034    | 0.163     |  | -0.026 |
| A023079_01 | At5g42230 | serine carboxypeptidase-II like; protein id: At5g42230.1                         | 0.845     | 0.959     | 0.97      |  | 1.474  |
| A023080_01 | At5g63370 | protein kinase; protein id: At5g63370.1                                          | -0.492    | -0.603    | -0.492    |  | -0.565 |
| A023089_01 | At5g05380 | putative protein; protein id: At5g05380.1                                        | -0.432 NA | NA        | NA        |  |        |
| A023091_01 | At5g40240 | putative protein; protein id: At5g40240.1                                        | -0.439 NA | NA        | NA        |  |        |
| A023102_01 | At5g48090 | putative protein; protein id: At5g48090.1                                        | -0.194    | -0.607 NA |           |  | -0.053 |
| A023109_01 | At5g65940 | 3-hydroxyisobutyryl-coenzyme A hydrolase; protein                                | -0.239    | -0.274    | 0.185     |  | 0.089  |
| A023113_01 | At5g47310 | putative protein; protein id: At5g47310.1                                        | 0.176     | 0.278     | 0.368     |  | 0.538  |
| A023114_01 | At5g47340 | palmitoyl-protein thioesterase precursor-like; protein                           | -0.869    | -1.044 NA | NA        |  |        |
| A023119_01 | At5g63970 | putative protein; protein id: At5g63970.1                                        | -1.33     | -1.156    | -0.306    |  | -0.828 |
| A023126_01 | At5g49060 | DnaJ-like protein; protein id: At5g49060.1                                       | -0.152    | -0.264 NA |           |  | 0.04   |
| A023130_01 | At5g51080 | putative protein; protein id: At5g51080.1                                        | 0.852     | 0.991     | 0.787     |  | 1.382  |
| A023136_01 | At5g46610 | putative protein; protein id: At5g46610.1                                        | -0.396    | -0.786    | -0.477    |  | -0.315 |
| A023137_01 | At5g06110 | cell division related protein-like; protein id: At5g06110.1                      | 0.445     | 0.51      | 0.545     |  | 0.276  |
| A023138_01 | At5g01060 | putative protein - kinase; protein id: At5g01060.1                               | -0.309    | -0.201 NA | NA        |  |        |
| A023148_01 | At5g17110 | putative protein; protein id: At5g17110.1                                        | -0.479    | -0.328    | -0.363    |  | -0.054 |
| A023158_01 | At5g15670 | putative protein; protein id: At5g15670.1                                        | 1.131     | 0.931     | 0.741     |  | 0.854  |
| A023159_01 | At1g26970 | protein kinase, putative; protein id: At1g26970.1                                | -1.178    | -1.217    | -0.789    |  | -0.749 |
| A023163_01 | At1g62190 | hypothetical protein; protein id: At1g62190.1                                    | -0.039 NA | NA        |           |  | -0.412 |
| A023177_01 | At5g08750 | expressed protein; protein id: At5g08750.1                                       | 0.404     | 0.14      | 0.227     |  | 0.597  |
| A023183_01 | At1g61130 | hypothetical protein; protein id: At1g61130.1                                    | 0.135     | -0.095    | 0.058     |  | 0.193  |
| A023185_01 | At1g22980 | unknown protein; protein id: At1g22980.1                                         | -0.35     | -0.803    | -0.395    |  | -0.79  |
| A023186_01 | At1g22900 | disease resistance response protein-related; protein                             | 0.342     | 0.214     | 0.076     |  | -0.109 |
| A023188_01 | At1g04540 | hypothetical protein; protein id: At1g04540.1                                    | -0.086    | -0.1      | -0.452    |  | -0.119 |
| A023198_01 | At1g23070 | hypothetical protein; protein id: At1g23070.1                                    | 1.101     | 0.911     | 0.879     |  | 0.979  |
| A023199_01 | At3g28650 | CHP-rich zinc finger protein, putative; protein id: At3g28650.1                  | -0.834    | -0.179 NA |           |  | -0.313 |
| A023202_01 | At1g78960 | lupeol synthase (LUP1), putative; protein id: At1g78960.1                        | 0.498     | -0.267    | -0.514    |  | 0.175  |
| A023223_01 | At4g13480 | myb family transcription factor; protein id: At4g13480.1 NA                      | NA        | NA        |           |  | -1.268 |
| A023228_01 | At1g23840 | expressed protein; protein id: At1g23840.1                                       | -0.69     | -0.728    | -1.299    |  | -1.897 |
| A023230_01 | At4g10640 | putative protein; protein id: At4g10640.1                                        | -0.63     | -0.613    | -0.834    |  | -0.499 |
| A023232_01 | At1g04480 | putative putative 60S ribosomal protein L17; protein                             | -0.14 NA  |           | -0.249    |  | -0.624 |
| A023237_01 | xxxx      | b/t UDP-N-acetylglucosamine pyrophosphorylase-like                               | 1.044 NA  |           | 0.153     |  | 0.454  |
| A023239_01 | At1g61540 | hypothetical protein; protein id: At1g61540.1                                    | 0.021 NA  |           | -0.127    |  | -0.035 |
| A023241_01 | At1g54010 | myosinase-associated protein, putative; protein id: At1g54010.1                  | 0.054     | -0.042    | 0.081     |  | 0.587  |
| A023242_01 | At1g54090 | hypothetical protein; protein id: At1g54090.1                                    | -1.328    | -1.666    | -1.271    |  | -1.793 |
| A023250_01 | At1g11770 | FAD-linked oxidoreductase family; protein id: At1g11770.1                        | -0.152    | 0.273     | -0.349    |  | 0.318  |
| A023252_01 | At1g20880 | RRM-containing protein; protein id: At1g20880.1                                  | -0.986 NA |           | -0.947    |  | -1.763 |
| A023259_01 | At1g10300 | putative GTP-binding protein; protein id: At1g10300.1                            | -1.347    | -1.29     | -0.788    |  | -1.145 |
| A023272_01 | At1g21720 | 20S proteasome beta subunit C (PBC1); protein id: At1g21720.1                    | -0.078    | -1.555    | -0.827    |  | -0.78  |
| A023277_01 | At1g47540 | trypsin inhibitor 2, putative; protein id: At1g47540.1                           | -2.535 NA |           | -2.31 NA  |  |        |
| A023279_01 | At4g04750 | putative sugar transporter; protein id: At4g04750.1                              | -1.96 NA  | NA        | NA        |  |        |
| A023283_01 | At1g70980 | asparaginyl-tRNA synthetase(SYNC1) protein, putative                             | -0.354 NA | NA        | NA        |  |        |
| A023287_01 | At1g52490 | hypothetical protein; protein id: At1g52490.1                                    | 0.238 NA  | NA        | NA        |  |        |
| A023290_01 | xxxx      | b/t late embryogenesis-abundant protein, putative; protein id: At1g52490.1 NA    | NA        | NA        | NA        |  |        |
| A023297_01 | At1g73110 | rubisco activase, putative; protein id: At1g73110.1                              | 1.03      | 0.863     | 1.068     |  | 1.382  |
| A023312_01 | At1g56040 | hypothetical protein; protein id: At1g56040.1                                    | -0.19     | 0.13 NA   |           |  | 0.188  |
| A023324_01 | At3g51895 | sulfate transporter ATST1; protein id: At3g51895.1                               | 0.29      | 0.316     | 0.518     |  | 0.497  |
| A023329_01 | At3g46530 | disease resistance protein, RPP13-like (CC-NBS class I); protein id: At3g46530.1 | -0.831    | -1.225 NA |           |  | -1.289 |
| A023335_01 | At2g33530 | putative serine carboxypeptidase II; protein id: At2g33530.1                     | 0.646     | 0.572     | 0.551     |  | 0.93   |
| A023339_01 | At2g43630 | unknown protein; protein id: At2g43630.1                                         | 0.236     | 0.492     | -0.16     |  | -0.131 |
| A023346_01 | At2g43260 | hypothetical protein; protein id: At2g43260.1                                    | -0.319 NA | NA        | NA        |  |        |
| A023347_01 | At2g40590 | 40S ribosomal protein S26; protein id: At2g40590.1                               | 0.274     | 0.904     | 0.911     |  | 0.571  |
| A023348_01 | At2g47370 | hypothetical protein; protein id: At2g47370.1                                    | 0.343 NA  |           | 0.04      |  | -0.08  |
| A023353_01 | At2g17110 | expressed protein; protein id: At2g17110.1                                       | -0.793    | -1.151 NA |           |  | -1.254 |
| A023354_01 | At2g23200 | putative protein kinase; protein id: At2g23200.1                                 | -2.334    | -1.816    | -1.225 NA |  |        |
| A023363_01 | At2g32920 | putative protein disulfide isomerase; protein id: At2g32920.1                    | 1.001     | 0.701     | 0.433     |  | 0.795  |
| A023376_01 | At2g23790 | hypothetical protein; protein id: At2g23790.1                                    | -0.384 NA |           | 0.042     |  | 0.125  |
| A023378_01 | At2g44270 | hypothetical protein; protein id: At2g44270.1                                    | 0.267     | 0.065     | 0.218     |  | 0.383  |
| A023386_01 | At2g45800 | putative LIM-domain protein; protein id: At2g45800.1                             | -0.442    | -0.399    | -0.798    |  | -1.583 |

|            |           |                                                                                       |           |           |        |        |
|------------|-----------|---------------------------------------------------------------------------------------|-----------|-----------|--------|--------|
| A023389_01 | At2g45860 | hypothetical protein; protein id: At2g45860.1                                         | 0.642 NA  |           | 0.794  | 0.668  |
| A023404_01 | At2g35290 | hypothetical protein; protein id: At2g35290.1                                         | -1.037    | -0.738 NA | NA     |        |
| A023424_01 | At2g32450 | putative O-GlcNAc transferase; protein id: At2g32450.1                                | -0.316 NA |           | -0.65  | -0.47  |
| A023428_01 | At2g32500 | hypothetical protein; protein id: At2g32500.1                                         | 0.355 NA  |           | -0.19  | -0.523 |
| A023431_01 | At2g32570 | unknown protein; protein id: At2g32570.1                                              | 0.857     | 1.098     | 0.18   | 0.344  |
| A023433_01 | At2g32610 | putative cellulose synthase; protein id: At2g32610.1 NA                               | NA        | NA        | NA     |        |
| A023440_01 | At2g38410 | unknown protein; protein id: At2g38410.1                                              | -1.271    | -1.34     | -0.575 | -1.65  |
| A023441_01 | At2g38420 | hypothetical protein; protein id: At2g38420.1                                         | -0.184 NA | NA        |        | -0.529 |
| A023443_01 | At2g38450 | expressed protein; protein id: At2g38450.1                                            | -0.506 NA | NA        |        | -0.82  |
| A023453_01 | At2g14740 | spot 3 protein and vacuolar sorting receptor homolog                                  | -0.271    | 0.275     | -0.081 | 0.393  |
| A023457_01 | At2g19720 | 40S ribosomal protein S15A; protein id: At2g19720.1                                   | 0.861     | 0.743     | 0.577  | 0.762  |
| A023470_01 | At2g35340 | putative pre-mRNA splicing factor RNA helicase; protein id: At2g35340.1               | 0.176     | 0.044     | 0.323  | 0.889  |
| A023473_01 | At2g29050 | hypothetical protein; protein id: At2g29050.1                                         | 0.532 NA  |           | 0.363  | 0.505  |
| A023476_01 | At2g45970 | cytochrome P450, putative; protein id: At2g45970.1                                    | 0.879     | 0.939     | 1.037  | 1.289  |
| A023491_01 | At2g18860 | unknown protein; protein id: At2g18860.1                                              | -0.948 NA |           | -0.395 | -1.133 |
| A023504_01 | At2g05850 | putative serine carboxypeptidase II; protein id: At2g05850.1                          | -0.277    | -0.301 NA | NA     |        |
| A023507_01 | At2g35660 | monooxygenase family; protein id: At2g35660.1                                         | -0.485    | 0.127     | -0.564 | -0.012 |
| A023523_01 | At2g31960 | callose synthase (1,3-beta-glucan synthase) family; protein id: At2g31960.1           | -0.798    | -1.302 NA |        | -0.231 |
| A023537_01 | At2g36800 | putative glucosyl transferase; protein id: At2g36800 NA                               | NA        |           | -1.72  | -2.731 |
| A023546_01 | At2g46610 | arginine/serine-rich splicing factor RSP31, putative; protein id: At2g46610.1         | 0.279     | 0.21      | 0.369  | -0.144 |
| A023566_01 | At2g36580 | putative pyruvate kinase; protein id: At2g36580.1                                     | 0.644     | 0.4       | 0.583  | 0.675  |
| A023589_01 | At2g16400 | homeodomain protein; protein id: At2g16400.1                                          | -0.12     | -0.172    | 0.019  | 0.064  |
| A023607_01 | At2g13650 | putative vanadate resistance protein; protein id: At2g13650.1                         | -0.101    | -0.108 NA |        | 0.192  |
| A023609_01 | At2g01860 | hypothetical protein; protein id: At2g01860.1                                         | -0.563 NA | NA        |        | -0.501 |
| A023620_01 | At2g31500 | putative calcium-dependent protein kinase; protein id: At2g31500.1                    | -0.48     | -0.409 NA | NA     |        |
| A023621_01 | At2g31510 | putative RING zinc finger protein; protein id: At2g31510.1                            | -0.378    | -0.62     | -0.406 | -0.11  |
| A023622_01 | At2g31530 | putative preprotein translocase SECY protein; protein id: At2g31530.1                 | 0.303     | 0.17      | 0.088  | 0.352  |
| A023623_01 | At2g31560 | unknown protein; protein id: At2g31560.1                                              | -1.146    | -1.383    | -0.055 | -0.83  |
| A023629_01 | At2g31670 | unknown protein; protein id: At2g31670.1                                              | 0.909     | 0.96      | 0.796  | 0.384  |
| A023630_01 | At2g31680 | GTP-binding protein, putative; protein id: At2g31680.1                                | -0.555 NA | NA        |        | -0.427 |
| A023652_01 | At2g17150 | unknown protein; protein id: At2g17150.1                                              | -0.451 NA | NA        | NA     |        |
| A023658_01 | At2g36080 | putative DNA-binding protein RAV2; protein id: At2g36080.1                            | -1.281 NA |           | -0.362 | -1.24  |
| A023665_01 | At2g13370 | putative chromodomain-helicase-DNA-binding protein; protein id: At2g13370.1           | -0.124    | -0.41     | 0.096  | -0.052 |
| A023672_01 | At2g22040 | unknown protein; protein id: At2g22040.1                                              | -0.12     | -0.105    | 0.133  | 0.267  |
| A023685_01 | At2g25140 | HSP100/ClpB, putative; protein id: At2g25140.1                                        | -0.046 NA |           | -0.443 | -0.989 |
| A023689_01 | At2g41860 | putative calcium-dependent protein kinase; protein id: At2g41860.1                    | -0.239    | -0.327 NA | NA     |        |
| A023712_01 | At1g18070 | EF-1-alpha-related GTP-binding protein, putative; protein id: At1g18070.1             | 0.23      | 0.252     | 0.07   | 0.275  |
| A023721_01 | At1g14880 | unknown protein; protein id: At1g14880.1                                              | -3.952 NA | NA        | NA     |        |
| A023735_01 | At1g13780 | F-box protein; protein id: At1g13780.1                                                | 0.381 NA  |           | 0.284  | 0.258  |
| A023745_01 | At1g17370 | oligouridylate binding protein (UBP1), putative; protein id: At1g17370.1              | -0.108 NA |           | -0.279 | -0.508 |
| A023754_01 | At1g48230 | unknown protein; protein id: At1g48230.1                                              | 0.391     | 0.641     | 0.503  | 0.793  |
| A023756_01 | At1g20650 | protein kinase, putative; protein id: At1g20650.1                                     | -0.348    | -0.485    | -0.014 | 0.567  |
| A023760_01 | At1g12320 | hypothetical protein; protein id: At1g12320.1                                         | -0.376    | -0.479    | 0.069  | -0.47  |
| A023776_01 | At1g76030 | vacuolar ATP synthase subunit B; protein id: At1g76030.1                              | -0.033 NA |           | -0.541 | -0.66  |
| A023797_01 | At1g03520 | N-acetylglucosaminyltransferase family (Core-2/I-Br) protein; protein id: At1g03520.1 | -0.678    | -0.472    | -0.329 | -0.408 |
| A023802_01 | At1g23350 | conserved hypothetical protein; protein id: At1g23350.1                               | -0.577    | -0.31 NA  |        | -2.034 |
| A023806_01 | At1g23280 | mak16-like protein-related; protein id: At1g23280.1                                   | 0.897 NA  |           | 0.748  | 0.695  |
| A023808_01 | At1g23260 | E2, ubiquitin-conjugating enzyme, putative; protein id: At1g23260.1                   | -0.31     | -0.36     | 0.044  | -0.46  |
| A023814_01 | At1g75600 | histone H3, putative; protein id: At1g75600.1                                         | -0.947    | -0.508    | -0.381 | -0.554 |
| A023818_01 | At1g21440 | hypothetical protein; protein id: At1g21440.1                                         | 0.504 NA  |           | 1      | 0.95   |
| A023824_01 | At1g50660 | unknown protein; protein id: At1g50660.1                                              | 1.09      | 0.495     | 0.413  | 0.526  |
| A023852_01 | At1g47330 | unknown protein; protein id: At1g47330.1                                              | -0.007 NA | NA        |        | 0.037  |
| A023870_01 | At1g61380 | expressed protein; protein id: At1g61380.1                                            | 0.095     | 0.135     | -0.107 | 0.251  |
| A023876_01 | At1g29030 | hypothetical protein; protein id: At1g29030.1                                         | 0.212     | 0.408 NA  |        | 0.136  |
| A023896_01 | At1g64610 | hypothetical protein; protein id: At1g64610.1                                         | -1.083 NA | NA        | NA     |        |
| A023897_01 | At1g76140 | prolyl endopeptidase, putative; protein id: At1g76140.1                               | 0.223     | 0.194     | 0.182  | 0.661  |
| A023902_01 | At1g27840 | G-protein beta-subunit (transducin) family; protein id: At1g27840.1                   | -0.338 NA | NA        |        | 0.218  |
| A023904_01 | At1g49130 | CONSTANS B-box zinc finger family protein; protein id: At1g49130.1                    | -0.717    | -0.497    | -0.339 | -0.212 |
| A023913_01 | At1g68410 | putative protein phosphatase; protein id: At1g68410.1                                 | -0.018    | -0.366 NA |        | 0.27   |
| A023941_01 | At1g07150 | MAP3K gamma protein kinase, putative; protein id: At1g07150.1                         | NA        | NA        | NA     | NA     |
| A023943_01 | At1g26120 | hypothetical protein; protein id: At1g26120.1                                         | -0.68 NA  |           | -0.516 | -0.651 |
| A023982_01 | At3g04960 | hypothetical protein; protein id: At3g04960.1                                         | 0.414 NA  | NA        |        | 0.584  |
| A023987_01 | At1g47970 | expressed protein; protein id: At1g47970.1                                            | 0.119 NA  |           | 0.318  | -0.157 |
| A023993_01 | At1g60880 | MADS-box protein; protein id: At1g60880.1                                             | -0.348    | -0.549    | -0.092 | -0.115 |
| A023994_01 | At1g77500 | unknown protein; protein id: At1g77500.1                                              | -0.052    | 0.085 NA  |        | 0.132  |
| A023999_01 | At1g64330 | unknown protein; protein id: At1g64330.1                                              | 0.69      | 0.241 NA  |        | 0.754  |
| A024001_01 | At1g29410 | phosphoribosylanthranilate isomerase; protein id: At1g29410.1                         | 0.861     | 0.27      | 0.751  | 0.523  |
| A024024_01 | At1g36050 | acetyl-CoA carboxylase, putative; protein id: At1g36050.1                             | 0.324     | 0.204     | -0.043 | 0.107  |

|            |           |                                                        |           |           |        |        |
|------------|-----------|--------------------------------------------------------|-----------|-----------|--------|--------|
| A024026_01 | At1g70580 | putative alanine aminotransferase; protein id: At1g7   | -0.94     | -1.429    | -0.817 | -1.299 |
| A024027_01 | At1g68540 | putative reductase; protein id: At1g68540.1            | 0.604     | 0.265     | 0.302  | 0.537  |
| A024030_01 | At1g69670 | E3 ubiquitin ligase SCF complex subunit Cullin, put    | -0.176 NA | NA        | NA     | NA     |
| A024035_01 | At1g68310 | unknown protein; protein id: At1g68310.1               | 0.179     | -0.089    | 0.333  | -0.1   |
| A024038_01 | At1g75280 | isoflavone reductase homolog P3; protein id: At1g7!    | -3.048    | -2.717    | -1.242 | -0.687 |
| A024039_01 | At1g75300 | isoflavone reductase homolog P3, putative; protein     | -1.223    | -1.767    | -0.178 | -0.233 |
| A024040_01 | At3g01300 | putative protein kinase; protein id: At3g01300.1       | 0.141     | -0.02     | 0.314  | 0.268  |
| A024042_01 | At3g01050 | expressed protein; protein id: At3g01050.1             | -0.113 NA |           | -0.231 | -0.332 |
| A024046_01 | At3g07565 | hypothetical protein; protein id: At3g07565.1          | -0.603    | -0.698    | -0.35  | -0.609 |
| A024056_01 | At3g10270 | putative DNA gyrase subunit B; protein id: At3g102!    | 0.236     | 0.003     | -0.166 | -0.253 |
| A024063_01 | At3g03430 | pollen allergen Bra r II; protein id: At3g03430.1      | -0.593    | -0.338    | -0.811 | -1.727 |
| A024067_01 | At3g02310 | floral homeotic protein AGL4; protein id: At3g02310    | -0.67     | -0.839    | -0.122 | 0.132  |
| A024071_01 | At3g06470 | unknown protein; protein id: At3g06470.1               | -0.292 NA | NA        | NA     | NA     |
| A024074_01 | At3g05570 | unknown protein; protein id: At3g05570.1               | -0.191    | -0.054 NA |        | -0.27  |
| A024084_01 | At3g07260 | unknown protein; protein id: At3g07260.1               | -0.032    | -0.12     | -0.108 | -0.195 |
| A024086_01 | At3g09900 | ras family GTP-binding protein, putative; protein id:  | -0.012    | -0.58     | 0.007  | 0.032  |
| A024089_01 | At3g02950 | expressed protein; protein id: At3g02950.1             | 0.56 NA   |           | 0.551  | 0.66   |
| A024092_01 | At3g04090 | hypothetical protein; protein id: At3g04090.1          | -0.937    | -0.847    | -0.57  | -0.933 |
| A024099_01 | At1g31630 | MADS-box protein; protein id: At1g31630.1              | NA        | NA        | NA     | -0.68  |
| A024101_01 | At1g08210 | expressed protein; protein id: At1g08210.1             | 0.845     | 0.801     | 0.777  | 1.129  |
| A024105_01 | At2g27530 | 60S ribosomal protein L10A; protein id: At2g27530.     | 1.051     | 0.561     | 0.819  | 1.361  |
| A024106_01 | At5g64813 | expressed protein; protein id: At5g64813.1             | -0.271    | -0.324    | -0.14  | -0.028 |
| A024107_01 | At1g23440 | hypothetical protein; protein id: At1g23440.1          | -1.615    | -1.783    | -0.718 | -1.328 |
| A024109_01 | xxxx      | b/t expressed protein; protein id: At2g20890.1 and p   | -0.688    | -0.664 NA |        | -0.017 |
| A024112_01 | At2g05220 | 40S ribosomal protein S17; protein id: At2g05220.1     | 0.417     | 0.567     | 0.841  | 1.211  |
| A024113_01 | At5g26734 | putative protein; protein id: At5g26734.1              | -0.416    | -0.178    | -0.149 | 0.139  |
| A024114_01 | At4g19390 | putative protein; protein id: At4g19390.1              | 0.286     | 0.288     | -0.172 | -0.346 |
| A024115_01 | At3g06440 | expressed protein; protein id: At3g06440.1             | 0.528     | 0.322     | -0.065 | 0.25   |
| A024116_01 | At1g42440 | expressed protein; protein id: At1g42440.1             | 0.418     | 0.167     | -0.026 | 0.365  |
| A024118_01 | At1g12250 | chloroplast lumen pentapeptide protein, putative; pr   | -0.322 NA |           | -0.514 | -0.923 |
| A024123_01 | At1g60740 | peroxiredoxin, putative; protein id: At1g60740.1       | -0.077    | 0.039     | 0.127  | -0.569 |
| A024128_01 | At5g26751 | shaggy-like kinase alpha; protein id: At5g26751.1      | -0.276    | -0.112    | -0.141 | -0.089 |
| A024151_01 | At2g35010 | thioredoxin, putative; protein id: At2g35010.1         | 0.481     | 0.491     | 0.645  | 0.494  |
| A024153_01 | At5g12480 | calcium-dependent protein kinase-like protein; prote   | 0.159     | -0.121    | -0.082 | 0.531  |
| A024157_01 | At5g63710 | leucine-rich repeat transmembrane protein kinase, p    | -0.898 NA | NA        | NA     | NA     |
| A024160_01 | At5g27670 | histone H2A-like protein; protein id: At5g27670.1      | -0.185    | 0.147     | 0.031  | -0.102 |
| A024161_01 | At1g61250 | secretory carrier membrane protein; protein id: At1g   | -0.543    | -0.597    | -0.45  | -0.804 |
| A024166_01 | At3g43700 | hypothetical protein; protein id: At3g43700.1          | 0.16 NA   | NA        |        | 0.078  |
| A024169_01 | At1g14920 | signal response protein (GAI); protein id: At1g14920   | -0.051    | 0.595     | 0.828  | 1.503  |
| A024172_01 | At5g17440 | putative protein; protein id: At5g17440.1              | 0.104 NA  | NA        |        | -0.006 |
| A024173_01 | At3g10480 | expressed protein; protein id: At3g10480.1             | -0.333    | -0.464    | 0.02   | -0.052 |
| A024174_01 | At5g24610 | putative protein; protein id: At5g24610.1              | 0.907     | 0.438     | 0.393  | 0.7    |
| A024175_01 | At5g28740 | putative protein; protein id: At5g28740.1              | 0.69      | 0.319 NA  |        | 0.205  |
| A024176_01 | At1g19580 | expressed protein; protein id: At1g19580.1             | 0.121     | 0.598     | 0.14   | 0.79   |
| A024180_01 | At1g26930 | A.t. chromosome 1 BAC T9L24 genomic sequence,          | -0.858    | -0.896    | -0.233 | -0.76  |
| A024181_01 | At2g18750 | calmodulin-binding protein; protein id: At2g18750.1    | -0.38     | -0.824    | -0.406 | -0.29  |
| A024182_01 | At1g05560 | UDP-glucose transferase(UGT1); protein id: At1g05      | -2.699    | -2.99     | -1.47  | -1.893 |
| A024183_01 | At5g55930 | sexual differentiation process protein ISP4-like; prot | -0.806    | -0.721    | -0.642 | -1.085 |
| A024184_01 | At1g27650 | splicing factor U2AF small subunit, putative; protein  | 0.111     | -0.215    | -0.024 | -0.5   |
| A024187_01 | At4g21540 | putative protein; protein id: At4g21540.1              | -0.483    | -0.82     | -0.458 | -0.486 |
| A024188_01 | At1g31340 | related-to-ubiquitin (AtRUB1), putative; protein id: A | -0.289    | -0.231    | 0.059  | -0.2   |
| A024191_01 | At4g09620 | putative protein; protein id: At4g09620.1              | 0.004     | -0.045    | -0.116 | -0.135 |
| A024192_01 | At2g19450 | diacylglycerol O-acyltransferase; protein id: At2g19!  | 0.029     | 0.296     | -0.365 | -0.096 |
| A024193_01 | At5g42390 | pitriylsin; protein id: At5g42390.1                    | NA        | NA        | -0.775 | -0.78  |
| A024195_01 | At1g51500 | ABC transporter family protein; protein id: At1g5150   | -1.246    | -1.394    | -0.814 | -1.166 |
| A024196_01 | At1g52370 | chloroplast 50S ribosomal protein L22, putative; pro   | 0.239 NA  |           | 0.253  | 0.549  |
| A024197_01 | At2g42030 | putative RING zinc finger protein; protein id: At2g42  | 0.038     | -0.271    | -0.265 | -0.451 |
| A024199_01 | At3g23980 | unknown protein; protein id: At3g23980.1               | 0.134 NA  | NA        | NA     | NA     |
| A024201_01 | At4g28200 | putative protein; protein id: At4g28200.1              | 0.396     | 0.274 NA  |        | -0.633 |
| A024207_01 | At1g49820 | expressed protein; protein id: At1g49820.1             | -0.117    | -0.374    | -0.384 | -0.311 |
| A024209_01 | At1g71840 | G-protein beta-subunit (transducin) family; protein ic | 0.106     | -0.019    | 0.012  | 0.509  |
| A024211_01 | At4g32160 | putative protein; protein id: At4g32160.1              | -0.218    | -0.648    | -0.71  | -0.494 |
| A024212_01 | At3g15610 | expressed protein; protein id: At3g15610.1             | -0.533    | -0.519    | -0.018 | 0.254  |
| A024214_01 | At4g08320 | putative protein (fragment); protein id: At4g08320.1   | -0.193 NA |           | -0.394 | -0.208 |
| A024215_01 | At4g36250 | aldehyde dehydrogenase like protein; protein id: At!   | 0.659     | 0.466     | 0.608  | 1.039  |
| A024219_01 | At5g57710 | 101 kDa heat shock protein; HSP101-like protein; p     | -1.504    | -1.446    | -0.861 | -1.33  |
| A024220_01 | At4g33380 | putative protein; protein id: At4g33380.1              | 0.063 NA  |           | -0.227 | -0.039 |
| A024222_01 | At3g46000 | actin depolymerizing factor 2 (ADF2); protein id: At!  | 0.153     | -0.239    | 0.012  | -0.279 |

|            |               |                                                                                       |        |        |        |        |
|------------|---------------|---------------------------------------------------------------------------------------|--------|--------|--------|--------|
| A024223_01 | At2g47350     | unknown protein; protein id: At2g47350.1                                              | -0.068 | -0.333 | NA     | -0.244 |
| A024224_01 | At3g07220     | unknown protein; protein id: At3g07220.1                                              | -0.382 | -0.315 | -0.362 | -0.587 |
| A024226_01 | At1g74380     | putative alpha galactosyltransferase; protein id: At1g74380.1                         | 0.269  | 0.367  | NA     | 0.317  |
| A024227_01 | At1g18620     | unknown protein; protein id: At1g18620.1                                              | 0.265  | NA     | -0.498 | -0.561 |
| A024228_01 | At4g35270     | putative protein; protein id: At4g35270.1                                             | -1.071 | -1.261 | NA     | NA     |
| A024229_01 | At4g32285     | putative protein; protein id: At4g32285.1                                             | -0.15  | NA     | NA     | -0.79  |
| A024230_01 | At4g19430     | expressed protein; protein id: At4g19430.1                                            | 0.147  | -0.214 | -0.222 | -0.79  |
| A024232_01 | At1g01780     | LIM domain protein, putative; protein id: At1g01780.1                                 | -0.929 | -0.677 | -0.523 | -0.844 |
| A024235_01 | At1g03290     | unknown protein; protein id: At1g03290.1                                              | -0.442 | -0.548 | -0.256 | 0.172  |
| A024236_01 | At2g45590     | putative protein kinase; protein id: At2g45590.1                                      | 0.531  | 0.609  | 0.679  | 0.831  |
| A024237_01 | At1g04630     | unknown protein; protein id: At1g04630.1                                              | 0.424  | 0.771  | 0.342  | 0.405  |
| A024239_01 | At5g06300     | lysine decarboxylase-like protein; protein id: At5g06300.1                            | 0.169  | 0.308  | 0.496  | 0.898  |
| A024241_01 | At3g61540     | prolyl aminopeptidase-like protein; protein id: At3g61540.1                           | 0.352  | NA     | NA     | -0.038 |
| A024242_01 | At3g19640     | unknown protein; protein id: At3g19640.1                                              | -0.164 | 0.076  | 0.151  | 0.577  |
| A024243_01 | At1g72390     | unknown protein; protein id: At1g72390.1                                              | -0.345 | -1.065 | NA     | NA     |
| A024246_01 | At2g47960     | expressed protein; protein id: At2g47960.1                                            | -0.089 | -0.206 | -0.262 | -0.375 |
| A024247_01 | At1g03060     | putative transport protein; protein id: At1g03060.1                                   | 0.419  | -0.354 | NA     | -0.706 |
| A024248_01 | At5g54670     | kinesin-like protein C (katC); protein id: At5g54670.1                                | 0.31   | 0.162  | 0.579  | 1.254  |
| A024249_01 | At2g40140     | putative CCCH-type zinc finger protein; protein id: At2g40140.1                       | -1.394 | -1.609 | -0.732 | -1.101 |
| A024250_01 | At1g23740     | putative auxin-induced protein; protein id: At1g23740.1                               | -0.919 | -0.436 | -0.963 | -0.346 |
| A024251_01 | At2g06990     | DEAD/DEAH box RNA helicase (HUA ENHANCER); protein id: At2g06990.1                    | 0.238  | 0.072  | 0.104  | 0.724  |
| A024253_01 | At4g02010     | putative NAK-like ser/thr protein kinase; protein id: At4g02010.1                     | 0.49   | 0.227  | NA     | 0.662  |
| A024255_01 | At2g16280     | putative beta-ketoacyl-CoA synthase; protein id: At2g16280.1                          | -0.289 | -0.003 | 0.327  | 0.473  |
| A024257_01 | At5g58640     | putative protein; protein id: At5g58640.1                                             | 0.174  | 0.298  | 0.369  | 0.071  |
| A024258_01 | At4g18130     | phytochrome E; protein id: At4g18130.1                                                | 0.044  | -0.055 | 0.403  | 0.412  |
| A024259_01 | At3g48340     | AtCEP2; cysteine proteinase; protein id: At3g48340.1                                  | -2.629 | -3.151 | -1.258 | -2.088 |
| A024261_01 | At5g30495     | hypothetical protein; protein id: At5g30495.1                                         | -0.187 | 0.394  | 0.112  | 0.486  |
| A024262_01 | At4g11680     | putative protein; protein id: At4g11680.1                                             | 0.336  | NA     | NA     | -0.023 |
| A024268_01 | At2g43020     | putative amine oxidase; protein id: At2g43020.1                                       | -0.161 | NA     | -0.103 | 0.233  |
| A024270_01 | not annotated | between At3g26390 and At3g26400 Chr3 W/96668:1-96669:1                                | -1.042 | NA     | -0.457 | -0.902 |
| A024271_01 | xxxx          | b/t hypothetical protein; protein id: At3g17230.1 and At3g17230.2                     | 0.262  | 0.102  | 0.297  | 0.598  |
| A024272_01 | At3g09910     | GTP-binding protein, putative; protein id: At3g09910.1                                | -0.118 | -0.312 | 0.55   | 0.684  |
| A024274_01 | At5g54580     | RRM-containing protein; protein id: At5g54580.1                                       | 0.291  | 0.39   | 0.439  | 0.305  |
| A024276_01 | At5g61240     | Cf-5 disease resistance protein - like; protein id: At5g61240.1                       | 0.091  | NA     | 0.458  | 0.395  |
| A024279_01 | At2g14080     | disease resistance protein (TIR-NBS-LRR class), putative; protein id: At2g14080.1     | -1.43  | NA     | NA     | NA     |
| A024280_01 | At1g05520     | transport protein, putative; protein id: At1g05520.1                                  | -0.08  | NA     | NA     | NA     |
| A024282_01 | At5g62740     | putative protein; protein id: At5g62740.1                                             | -0.421 | -0.458 | -0.024 | 0.036  |
| A024284_01 | At2g44760     | unknown protein; protein id: At2g44760.1                                              | 0.381  | NA     | NA     | 0.08   |
| A024286_01 | At1g05150     | putative O-GlcNAc transferase; protein id: At1g05150.1                                | 0.538  | NA     | NA     | 0.829  |
| A024288_01 | At4g34640     | farnesyl-diphosphate farnesyltransferase (squalene synthase); protein id: At4g34640.1 | 0.255  | 0.011  | 0.202  | 0.951  |
| A024289_01 | At3g52360     | expressed protein; protein id: At3g52360.1                                            | -0.684 | -0.105 | NA     | -0.532 |
| A024291_01 | At1g14320     | tumor suppressor, putative; protein id: At1g14320.1                                   | 0.968  | 0.592  | 0.773  | 1.487  |
| A024292_01 | At1g08930     | zinc finger protein ATZF1, putative; protein id: At1g08930.1                          | -1.176 | -0.439 | -0.894 | -1.749 |
| A024293_01 | At2g41160     | unknown protein; protein id: At2g41160.1                                              | NA     | NA     | -0.071 | -0.254 |
| A024294_01 | At3g19950     | unknown protein; protein id: At3g19950.1                                              | -0.061 | -0.014 | 0.168  | 0.204  |
| A024296_01 | xxxx          | b/t fructose-bisphosphate aldolase - like protein; protein id: At3g19950.1            | -0.709 | -0.517 | NA     | -0.085 |
| A024297_01 | At5g08130     | myc-like protein; protein id: At5g08130.1                                             | 0.228  | NA     | NA     | -0.009 |
| A024298_01 | At4g30270     | xyloglucan endotransglycosylase (meri5B); protein id: At4g30270.1                     | -4.064 | -4.027 | -2.193 | -2.472 |
| A024299_01 | At3g12020     | kinesin-related protein; protein id: At3g12020.1                                      | -1.437 | NA     | NA     | -1.956 |
| A024300_01 | At1g70310     | spermidine synthase, putative; protein id: At1g70310.1                                | 0.281  | 0.379  | -0.059 | 0.046  |
| A024302_01 | At1g15780     | hypothetical protein; protein id: At1g15780.1                                         | -0.204 | -0.567 | -0.06  | -0.383 |
| A024303_01 | At5g50160     | FRO1 and FRO2-like protein; protein id: At5g50160.1                                   | -0.337 | -0.732 | -0.722 | -0.942 |
| A024304_01 | At3g10490     | expressed protein; protein id: At3g10490.1                                            | -0.652 | -1.034 | NA     | -0.747 |
| A024305_01 | At3g17040     | unknown protein; protein id: At3g17040.1                                              | -0.131 | -0.338 | -0.52  | -0.219 |
| A024306_01 | At1g71070     | N-acetylglucosaminyltransferase family (Core-2/I-Br) protein; protein id: At1g71070.1 | 0.671  | 0.923  | 0.89   | 1.042  |
| A024308_01 | At1g48450     | unknown protein; protein id: At1g48450.1                                              | -0.436 | -0.364 | -0.698 | -0.832 |
| A024310_01 | At2g47110     | ubiquitin extension protein (UBQ6); protein id: At2g47110.1                           | 0.751  | 0.521  | 0.708  | 1.429  |
| A024311_01 | At2g19620     | putative SF21 protein (Helianthus annuus); protein id: At2g19620.1                    | 1.162  | 1.141  | 0.908  | 1.294  |
| A024312_01 | At4g18905     | expressed protein; protein id: At4g18905.1                                            | 0.205  | 0.263  | 0.132  | 0.446  |
| A024315_01 | At3g02200     | unknown protein; protein id: At3g02200.1                                              | 0.255  | 0.247  | 0.341  | 0.806  |
| A024318_01 | At3g48930     | cytosolic ribosomal protein S11; protein id: At3g48930.1                              | 0.944  | 0.935  | 0.968  | 1.562  |
| A024321_01 | At3g13930     | putative acetyltransferase; protein id: At3g13930.1                                   | 0.496  | 0.257  | 0.187  | 0.461  |
| A024326_01 | At5g56870     | glycosyl hydrolase family 35 (beta-galactosidase); protein id: At5g56870.1            | -4.198 | -4.452 | -2.822 | -3.849 |
| A024328_01 | At2g36240     | putative salt-inducible protein; protein id: At2g36240.1                              | 0.158  | 0.186  | NA     | 0.134  |
| A024330_01 | At3g09840     | putative transitional endoplasmic reticulum ATPase; protein id: At3g09840.1           | -0.374 | -0.376 | -0.223 | 0.152  |
| A024331_01 | At1g24300     | unknown protein; protein id: At1g24300.1                                              | -0.652 | -0.661 | NA     | -0.865 |
| A024332_01 | At3g16180     | putative transport protein; protein id: At3g16180.1                                   | 0.882  | 0.896  | 0.754  | 1.369  |
| A024337_01 | At1g73450     | protein kinase, putative; protein id: At1g73450.1                                     | 0.254  | -0.244 | 0.1    | 0.227  |



|            |           |                                                            |           |           |        |        |
|------------|-----------|------------------------------------------------------------|-----------|-----------|--------|--------|
| A024339_01 | At5g61780 | 100 kDa coactivator - like protein; protein id: At5g61     | 0.576     | 0.621     | 0.36   | 0.266  |
| A024342_01 | At1g29470 | unknown protein; protein id: At1g29470.1                   | 1.113     | 0.723     | 0.132  | 0.176  |
| A024343_01 | At1g56110 | SAR DNA binding protein, putative; protein id: At1g5       | 1.076     | 0.823     | 0.699  | 1.164  |
| A024345_01 | At1g50140 | hypothetical protein; protein id: At1g50140.1              | 0.104 NA  | NA        |        | -0.123 |
| A024346_01 | At1g16190 | hypothetical protein; protein id: At1g16190.1              | 0.831     | 0.665     | 0.779  | 0.911  |
| A024347_01 | At5g06700 | putative protein; protein id: At5g06700.1                  | -0.137    | -0.058    | -0.344 | -0.511 |
| A024348_01 | At4g39960 | DnaJ - like protein; protein id: At4g39960.1               | -0.142 NA |           | -0.279 | -0.25  |
| A024349_01 | At1g72900 | disease resistance protein (TIR-NBS class), putative       | -2.002    | -1.982    | -2.019 | -1.737 |
| A024350_01 | At1g62570 | flavin-containing monooxygenase, putative; protein         | -1.282 NA | NA        |        | -1.02  |
| A024352_01 | At3g01310 | unknown protein; protein id: At3g01310.1                   | -0.163    | -0.107    | -0.556 | -0.793 |
| A024353_01 | At4g20170 | putative protein; protein id: At4g20170.1                  | 0.495     | 0.378     | 0.401  | 0.513  |
| A024354_01 | At2g39330 | putative myosinase-binding protein; protein id: At2g       | 1.758     | 1.603     | 1.454  | 1.949  |
| A024356_01 | At5g38480 | 14-3-3 protein GF14 psi (grf3/RC11); protein id: At5g      | 0.581     | 0.562     | 0.41   | 0.19   |
| A024357_01 | At1g14670 | endomembrane protein 70, putative; protein id: At1g        | 0.571 NA  |           | 0.225  | 0.067  |
| A024360_01 | At1g15380 | expressed protein; protein id: At1g15380.1                 | -1.47     | -1.511    | -0.453 | -1.162 |
| A024361_01 | At2g31610 | 40S ribosomal protein S3, putative; protein id: At2g       | 0.677     | 0.743     | 0.636  | 1.156  |
| A024362_01 | At5g39050 | acyltransferase - like protein                             | -0.961    | -0.851    | 0.093  | -0.168 |
| A024363_01 | At1g74510 | hypothetical protein; protein id: At1g74510.1              | 0.389     | 0.336     | 0.397  | 0.341  |
| A024368_01 | At4g26970 | putative aconitase; protein id: At4g26970.1                | -0.516 NA | NA        |        | -0.617 |
| A024369_01 | At1g15970 | hypothetical protein; protein id: At1g15970.1              | 0.921 NA  |           | 0.555  | 1.035  |
| A024370_01 | At2g14720 | spot 3 protein and vacuolar sorting receptor homolo        | -0.473    | -0.425    | -0.466 | -0.04  |
| A024372_01 | At3g27020 | expressed protein; protein id: At3g27020.1                 | -1.621    | -1.605    | -0.912 | -1.226 |
| A024373_01 | At3g20083 | pseudogene, cytochrome P450; protein id: At3g200           | -2.309 NA |           | -1.2   | -2.118 |
| A024374_01 | At4g00630 | putative potassium/H+ antiporter; protein id: At4g00       | -0.155    | -0.584 NA |        | -0.806 |
| A024376_01 | At1g20575 | expressed protein; protein id: At1g20575.1                 | -0.07 NA  |           | 0.046  | -0.233 |
| A024377_01 | At4g31580 | putative RSZp22 splicing factor; protein id: At4g315       | 0.172     | 0.463     | 0.558  | 1.079  |
| A024382_01 | At4g13270 | hypothetical protein; protein id: At4g13270.1              | -0.356    | -0.502    | -0.087 | -0.727 |
| A024389_01 | At4g19660 | putative protein; protein id: At4g19660.1                  | -0.001 NA | NA        |        | -0.17  |
| A024392_01 | At2g40510 | 40S ribosomal protein S26; protein id: At2g40510.1         | 0.475     | 0.628     | 0.685  | 0.82   |
| A024394_01 | At3g19240 | dem-like protein; protein id: At3g19240.1                  | -0.699    | -0.936    | -0.71  | -0.857 |
| A024395_01 | At1g49510 | unknown protein; protein id: At1g49510.1                   | 0.121     | 0.087     | 0      | 0.024  |
| A024396_01 | At1g55960 | membrane related protein CP5, putative; protein id:        | -1.337 NA |           | -1.067 | -1.119 |
| A024397_01 | At3g45830 | DNA-binding protein - like; protein id: At3g45830.1        | -0.568    | -0.79     | -0.218 | 0.1    |
| A024398_01 | At1g53310 | phosphoenolpyruvate carboxylase 1, putative; prote         | 0.654     | 0.584     | 0.732  | 1.246  |
| A024399_01 | At3g14270 | unknown protein; protein id: At3g14270.1                   | -0.979    | -1.393 NA |        | -0.851 |
| A024400_01 | At5g23610 | putative protein; protein id: At5g23610.1                  | -0.411    | -0.666    | -0.236 | 0.042  |
| A024401_01 | At4g01880 | unknown protein; protein id: At4g01880.1                   | NA        | NA        | NA     | 0.032  |
| A024402_01 | At5g09850 | unknown protein; protein id: At5g09850                     | 0.078 NA  |           | 0.12   | 0.291  |
| A024403_01 | At1g53850 | 20S proteasome alpha subunit E1 (PAE1); protein id:        | 0.108     | 0.121     | 0.142  | 0.184  |
| A024404_01 | At5g40810 | cytochrome c1 precursor; protein id: At5g40810.1           | 0.157     | 0.059     | -0.089 | 0.172  |
| A024405_01 | At1g73920 | putative lipase; protein id: At1g73920.1                   | -0.559 NA |           | -0.895 | -1.016 |
| A024406_01 | At1g65430 | unknown protein; protein id: At1g65430.1                   | NA        | NA        | NA     | -0.294 |
| A024410_01 | At3g60770 | ribosomal protein S13 -like; protein id: At3g60770.1       | 0.849     | 0.605     | 0.637  | 0.781  |
| A024413_01 | At2g29180 | unknown protein; protein id: At2g29180.1                   | 0.101     | 0.457     | 0.13   | -0.511 |
| A024414_01 | At2g32480 | expressed protein; protein id: At2g32480.1                 | -0.484    | -0.796    | -0.626 | -0.582 |
| A024417_01 | At1g18330 | hypothetical protein; protein id: At1g18330.1              | -0.414 NA |           | -0.633 | -1.423 |
| A024421_01 | At5g02020 | putative protein; protein id: At5g02020.1                  | -2.751    | -2.852    | -1.074 | -2.623 |
| A024425_01 | At3g26650 | glyceraldehyde 3-phosphate dehydrogenase A subu            | -0.462    | -0.427    | -0.457 | 0.129  |
| A024428_01 | At1g48760 | delta-adaptin, putative; protein id: At1g48760.1           | 0.163 NA  | NA        | NA     |        |
| A024429_01 | At4g30350 | putative protein; protein id: At4g30350.1                  | NA        | NA        | -0.501 | -0.62  |
| A024430_01 | At3g42640 | plasma membrane H+-ATPase-like protein; protein            | -0.439    | -0.676    | -1.029 | -1.106 |
| A024431_01 | At5g23670 | serine palmitoyltransferase; protein id: At5g23670.1       | 0.096     | -0.052    | -0.279 | 0.129  |
| A024434_01 | At1g60610 | unknown protein; protein id: At1g60610.1                   | -0.801    | -0.753    | -0.466 | -0.287 |
| A024435_01 | At5g54940 | translation initiation factor-like protein; protein id: At | -1.552    | -2.023    | -1.248 | -1.869 |
| A024439_01 | At1g19910 | vacuolar H+-ATPase proteolipid (16 kDa) subunit; p         | -0.513    | -0.379    | -0.17  | -0.01  |
| A024440_01 | At5g18170 | glutamate dehydrogenase (EC 1.4.1.-) 1 (pir  S7121         | 0.092 NA  |           | -0.337 | -0.574 |
| A024441_01 | At1g61740 | unknown protein; protein id: At1g61740.1                   | -0.481 NA |           | 0.207  | 0.187  |
| A024442_01 | At2g24420 | expressed protein; protein id: At2g24420.1                 | -0.737    | -0.743    | -0.806 | -0.765 |
| A024443_01 | At2g25210 | 60S ribosomal protein L39; protein id: At2g25210.1         | 0.598     | 0.747     | 0.994  | 0.628  |
| A024445_01 | At2g19760 | profilin 1; protein id: At2g19760.1                        | 0.083     | 0.262     | 0.275  | -0.039 |
| A024447_01 | At1g71880 | sucrose transport protein SUC1; protein id: At1g718        | -1.929    | -1.345    | -1.583 | -2.092 |
| A024449_01 | At4g18440 | adenylosuccinate lyase - like protein; protein id: At4     | 0.474     | 0.434     | -0.557 | -0.464 |
| A024451_01 | At3g15730 | phospholipase D, putative; protein id: At3g15730.1         | -0.017    | -0.094    | -0.008 | 0.379  |
| A024452_01 | At3g59780 | putative protein; protein id: At3g59780.1                  | 0.014     | 0.269 NA  |        | -0.075 |
| A024453_01 | At1g03860 | putative prohibitin 2; protein id: At1g03860.1             | 1.148     | 0.779     | 0.549  | 1.016  |
| A024454_01 | At3g22120 | unknown protein; protein id: At3g22120.1                   | 0.345     | 0.262     | 0.327  | 1.513  |
| A024456_01 | At1g58032 | hypothetical protein; protein id: At1g58032.1              | -1.055    | -1.276    | -0.785 | -1.058 |
| A024457_01 | At4g20820 | FAD-linked oxidoreductase family; protein id: At4g2        | NA        | NA        | NA     | NA     |

|            |           |                                                                                |        |        |        |        |
|------------|-----------|--------------------------------------------------------------------------------|--------|--------|--------|--------|
| A024459_01 | At4g31860 | protein phosphatase 2C (PP2C); protein id: At4g31860.1                         | -0.239 | -0.402 | -0.078 | 0.023  |
| A024461_01 | At4g29350 | profilin 2; protein id: At4g29350.1                                            | -0.54  | -1.028 | -0.37  | 0.045  |
| A024464_01 | At5g16570 | expressed protein; protein id: At5g16570.1                                     | -2.672 | -3.264 | -1.482 | NA     |
| A024465_01 | At3g28050 | expressed protein; protein id: At3g28050.1                                     | -0.982 | -1.268 | -0.435 | -0.549 |
| A024470_01 | At1g51400 | photosystem II 5 KD protein; protein id: At1g51400.1                           | -0.543 | -0.589 | -0.578 | -0.573 |
| A024471_01 | At1g70620 | unknown protein; protein id: At1g70620.1                                       | 0.066  | -0.252 | -0.704 | -0.37  |
| A024473_01 | At1g59700 | glutathione transferase, putative; protein id: At1g59700.1                     | NA     | NA     | NA     | NA     |
| A024474_01 | At5g66510 | ferrityochelin-binding protein-like; protein id: At5g66510.1                   | 0.912  | 0.924  | 0.945  | 1.308  |
| A024475_01 | At1g06680 | photosystem II oxygen-evolving complex 23 (OEC23); protein id: At1g06680.1     | 0.493  | -0.052 | -0.147 | 0.455  |
| A024476_01 | At1g72020 | expressed protein; protein id: At1g72020.1                                     | 0.207  | 0.349  | 0.54   | 0.583  |
| A024477_01 | At5g50850 | pyruvate dehydrogenase E1 component beta subunit; protein id: At5g50850.1      | 0.334  | 0.133  | 0.095  | 0.07   |
| A024478_01 | At5g36160 | putative protein; protein id: At5g36160.1                                      | -1.24  | -0.974 | -0.355 | -0.326 |
| A024480_01 | At5g11040 | putative protein; protein id: At5g11040.1                                      | 0.329  | 0.321  | NA     | 0.127  |
| A024481_01 | At4g17340 | membrane channel like protein; protein id: At4g17340.1                         | -1.817 | -1.637 | -1.422 | NA     |
| A024482_01 | At2g26280 | unknown protein; protein id: At2g26280.1                                       | -0.932 | -1.105 | -0.443 | -0.499 |
| A024484_01 | At1g68660 | expressed protein; protein id: At1g68660.1                                     | -1.309 | -1.13  | -0.654 | -1.498 |
| A024485_01 | At1g22410 | 3-deoxy-D-arabino-heptulosonate 7-phosphate, putative; protein id: At1g22410.1 | 0.364  | -0.398 | 0.074  | 0.358  |
| A024489_01 | At3g20650 | unknown protein; protein id: At3g20650.1                                       | -0.011 | -0.136 | 0.15   | 0.398  |
| A024490_01 | At5g05540 | putative protein; protein id: At5g05540.1                                      | 0.476  | 0.287  | 0.342  | 0.653  |
| A024493_01 | At5g23600 | putative protein; protein id: At5g23600.1                                      | -0.29  | -0.596 | -0.191 | -0.216 |
| A024494_01 | xxxx      | b/t unknown protein; protein id: At2g25480.1 and F-xxxx; protein id: F-xxxx    | -0.985 | -0.751 | -0.442 | -0.902 |
| A024495_01 | At2g27500 | glycosyl hydrolase family 17; protein id: At2g27500.1                          | NA     | NA     | -1.913 | -2.567 |
| A024496_01 | At5g13720 | unknown protein; protein id: At5g13720.1                                       | -1.112 | -0.954 | -0.504 | -1.397 |
| A024499_01 | At3g58830 | putative protein; protein id: At3g58830.1                                      | 0.208  | 0.216  | 0.51   | 0.414  |
| A024500_01 | At2g38120 | AUX1. Auxin resistant 1; auxin transport; protein id: At2g38120.1              | -0.064 | -0.202 | 0.296  | 0.16   |
| A024501_01 | At4g32060 | putative protein; protein id: At4g32060.1                                      | -0.43  | NA     | -0.884 | -0.38  |
| A024502_01 | At2g41380 | putative embryo-abundant protein; protein id: At2g41380.1                      | -2.883 | NA     | NA     | NA     |
| A024503_01 | At2g37750 | A.t. chromosome I BAC F9H16 genomic sequence; protein id: At2g37750.1          | NA     | NA     | NA     | NA     |
| A024504_01 | At3g13790 | glycosyl hydrolase family 32; protein id: At3g13790.1                          | 0.166  | -0.168 | -0.774 | -0.885 |
| A024505_01 | At4g11840 | phospholipase D-gamma, putative; protein id: At4g11840.1                       | 0.005  | -0.342 | NA     | 0.032  |
| A024506_01 | At2g36390 | starch branching enzyme II; protein id: At2g36390.1                            | 0.853  | 0.613  | 0.335  | 0.379  |
| A024507_01 | At5g67380 | casein kinase II alpha subunit; protein id: At5g67380.1                        | 0.081  | -0.066 | -0.131 | 0.368  |
| A024508_01 | At3g28940 | ALG2-like protein; protein id: At3g28940.1                                     | -1.205 | -1.126 | -0.591 | -1.114 |
| A024509_01 | At4g23430 | putative protein; protein id: At4g23430.1                                      | -1.142 | -1.216 | -1.024 | -1.246 |
| A024510_01 | At3g05490 | expressed protein; protein id: At3g05490.1                                     | 0.582  | 0.592  | 0.228  | 0.022  |
| A024511_01 | At4g27320 | putative protein; protein id: At4g27320.1                                      | -0.736 | -0.604 | -0.075 | -0.834 |
| A024512_01 | At3g19450 | cinnamyl alcohol dehydrogenase; protein id: At3g19450.1                        | -1.092 | -1.147 | -0.781 | -0.65  |
| A024513_01 | At4g37550 | formamidase - like protein; protein id: At4g37550.1                            | -0.379 | -0.637 | -0.658 | -0.46  |
| A024514_01 | At4g35090 | catalase 2; protein id: At4g35090.1                                            | -1.411 | -1.681 | -0.554 | -1.314 |
| A024518_01 | At2g25070 | protein phosphatase 2C (PP2C); protein id: At2g25070.1                         | -1.104 | -1.063 | -0.748 | -0.478 |
| A024521_01 | At1g17200 | expressed protein; protein id: At1g17200.1                                     | 0.728  | 0.878  | 0.719  | 0.989  |
| A024522_01 | At3g09390 | metallothionein-like protein; protein id: At3g09390.1                          | -0.841 | -0.916 | 0.031  | -0.38  |
| A024523_01 | At3g57290 | translation initiation factor 3-like protein; protein id: At3g57290.1          | 0.643  | 0.4    | 0.322  | 0.576  |
| A024526_01 | At4g10840 | putative protein; protein id: At4g10840.1                                      | 0.398  | -0.106 | -0.265 | -0.224 |
| A024527_01 | At1g75750 | expressed protein; protein id: At1g75750.1                                     | -1.985 | -2.431 | -1.309 | -1.506 |
| A024528_01 | At3g22440 | hydroxyproline-rich glycoprotein family; protein id: At3g22440.1               | -0.719 | -0.861 | -0.341 | -0.664 |
| A024530_01 | At4g23650 | putative calcium-dependent protein kinase (CDPK6); protein id: At4g23650.1     | 0.722  | 0.354  | 0.35   | 0.792  |
| A024531_01 | At1g36160 | hypothetical protein; protein id: At1g36160.1                                  | 0.378  | 0.29   | 0.631  | 1.245  |
| A024532_01 | At1g63000 | expressed protein; protein id: At1g63000.1                                     | 0.378  | 0.411  | 0.374  | 0.763  |
| A024534_01 | At4g14160 | transport protein; protein id: At4g14160.1                                     | -0.72  | -0.802 | -0.79  | -0.843 |
| A024536_01 | At1g05850 | glycosyl hydrolase family 19 (chitinase); protein id: At1g05850.1              | 0.445  | 0.297  | 0.219  | 0.217  |
| A024538_01 | At3g06850 | branched chain alpha-keto acid dehydrogenase E2; protein id: At3g06850.1       | -0.478 | -0.676 | -0.605 | -0.534 |
| A024539_01 | At5g51120 | polyadenylate-binding protein II (PAB2), putative; protein id: At5g51120.1     | 0.435  | 0.322  | 0.44   | 0.07   |
| A024544_01 | At5g02260 | expansin, putative; protein id: At5g02260.1                                    | -0.873 | NA     | NA     | -1.238 |
| A024545_01 | At4g21280 | expansin, putative; protein id: At4g21280.1                                    | 0.379  | 0.386  | -0.34  | -0.591 |
| A024546_01 | At1g64520 | 26S proteasome regulatory subunit (RPN12), putative; protein id: At1g64520.1   | 0.564  | 0.083  | 0.451  | 0.659  |
| A024547_01 | At5g23040 | putative protein; protein id: At5g23040.1                                      | 0.233  | NA     | -0.073 | -0.307 |
| A024548_01 | At2g46550 | expressed protein; protein id: At2g46550.1                                     | -0.52  | -0.814 | -0.718 | -0.78  |
| A024549_01 | At1g33250 | unknown protein; protein id: At1g33250.1                                       | 0.012  | -0.008 | -0.431 | -0.476 |
| A024551_01 | At2g20010 | unknown protein; protein id: At2g20010.1                                       | -0.302 | -0.55  | NA     | NA     |
| A024554_01 | At3g12590 | unknown protein; protein id: At3g12590.1                                       | 0.414  | 0.754  | 0.759  | -0.084 |
| A024555_01 | At1g72910 | disease resistance protein (TIR-NBS class), putative; protein id: At1g72910.1  | NA     | NA     | NA     | NA     |
| A024557_01 | At1g27730 | salt-tolerance zinc finger protein; protein id: At1g27730.1                    | NA     | NA     | -1.758 | -2.471 |
| A024558_01 | At3g18820 | GTP-binding protein, putative; protein id: At3g18820.1                         | -0.447 | -0.418 | -0.427 | -0.489 |
| A024559_01 | At1g42550 | unknown protein; protein id: At1g42550.1                                       | -1.174 | -1.515 | -0.822 | -1.237 |
| A024560_01 | At5g61600 | DNA binding protein - like; protein id: At5g61600.1                            | -2.388 | -2.145 | -1.236 | -2.542 |
| A024561_01 | At1g78900 | ATPase 70 kDa subunit, putative; protein id: At1g78900.1                       | 0.64   | 0.12   | -0.267 | -0.064 |
| A024562_01 | At1g43170 | ribosomal protein; protein id: At1g43170.1                                     | 0.624  | 0.541  | 0.615  | 1.416  |

|            |           |                                                           |           |           |        |        |
|------------|-----------|-----------------------------------------------------------|-----------|-----------|--------|--------|
| A024563_01 | At3g60130 | glycosyl hydrolase family 1; protein id: At3g60130.1      | -0.04     | 0.748     | -0.676 | -0.358 |
| A024564_01 | At1g05190 | putative chloroplast 50S ribosomal protein, L6; prote     | 0.519     | 0.315     | 0.006  | 0.074  |
| A024565_01 | At5g64130 | expressed protein; protein id: At5g64130.1                | 0.406     | 0.415     | 0.188  | -0.144 |
| A024567_01 | At3g62750 | glycosyl hydrolase family 1; protein id: At3g62750.1      | -0.318 NA |           | -0.539 | -0.752 |
| A024568_01 | At2g30880 | unknown protein; protein id: At2g30880.1                  | 0.393     | 0.17      | 0.241  | 0.408  |
| A024569_01 | At5g15650 | reversibly glycosylated polypeptide-3; protein id: At5    | 0.812     | 0.991     | 0.86   | 1.23   |
| A024570_01 | At5g65620 | putative oligopeptidase A                                 | 0.33      | 0.115     | -0.054 | 0.383  |
| A024571_01 | At4g34680 | GATA transcription factor 3                               | -0.903    | -0.801    | -0.009 | -0.123 |
| A024572_01 | At1g72320 | pumilio-family RNA-binding protein, putative; proteir     | 0.211     | 0.185     | 0.23   | 0.346  |
| A024573_01 | At5g52430 | unknown protein; protein id: At5g52430.1                  | NA        | NA        | NA     | -0.332 |
| A024575_01 | At4g02620 | putative vacuolar ATPase; protein id: At4g02620.1         | -0.292    | 0.078     | -0.047 | -0.611 |
| A024576_01 | At1g30880 | expressed protein; protein id: At1g30880.1                | -0.057    | -0.092    | 0.367  | -0.088 |
| A024577_01 | At4g39670 | putative protein; protein id: At4g39670.1                 | -0.684    | -0.42 NA  | NA     |        |
| A024578_01 | At3g17810 | dehydrogenase, putative; protein id: At3g17810.1          | -1.593    | -2.082    | -0.895 | -1.43  |
| A024579_01 | At2g38050 | 3-oxo-5-alpha-steroid 4-dehydrogenase; protein id: . NA   | NA        | NA        | 0.04   | -1.072 |
| A024580_01 | At5g11680 | unknown protein                                           | -0.728    | -1.09     | -0.674 | -1.106 |
| A024581_01 | At3g16570 | expressed protein; protein id: At3g16570.1                | -0.364 NA |           | -0.193 | -1.03  |
| A024583_01 | At5g15090 | voltage-dependent anion-selective channel protein I       | 0.28      | 0.141     | 0.045  | -0.032 |
| A024584_01 | At2g24200 | putative leucine aminopeptidase; protein id: At2g24:      | -0.028    | 0.075     | 0.125  | 0.876  |
| A024585_01 | At3g52590 | ubiquitin extension protein 1 (UBQ1); protein id: At3     | 0.761     | 0.761     | 0.845  | 1.412  |
| A024586_01 | At1g19920 | sulfate adenylyltransferase; protein id: At1g19920.1      | 0.578     | 0.589     | 0.698  | 1.197  |
| A024588_01 | At4g37300 | putative protein; protein id: At4g37300.1                 | -0.63     | -0.647    | -0.007 | -0.966 |
| A024589_01 | At1g79010 | NADH dehydrogenase, putative; protein id: At1g790         | 0.116     | 0.104     | 0.086  | 0.141  |
| A024590_01 | At5g13410 | FKBP-type peptidyl-prolyl cis-trans isomerase; prote      | -0.331    | -0.015    | -0.413 | -1.036 |
| A024592_01 | At1g43890 | GTP-binding protein(RAB1Y), putative; protein id: A       | -0.499    | -0.092    | 0.176  | -0.105 |
| A024595_01 | At1g22630 | auxin-regulated protein; protein id: At1g22630.1          | -0.229    | -0.354    | -0.05  | -0.614 |
| A024596_01 | At3g28710 | adenosine triphosphatase, putative; protein id: At3g      | -0.004    | -0.178    | -0.184 | 0.322  |
| A024597_01 | At2g21170 | putative triosephosphate isomerase; protein id: At2g      | 0.698     | 0.39      | 0.208  | -0.178 |
| A024598_01 | At5g47120 | Bax inhibitor-1 like; protein id: At5g47120.1             | -0.718    | -0.783    | -0.346 | -0.801 |
| A024599_01 | At2g25080 | glutathione peroxidase, putative; protein id: At2g250     | -1.804    | -1.615    | -1.42  | -1.893 |
| A024601_01 | At1g63220 | putative elicitor-responsive gene; protein id: At1g63:    | 0.8       | 0.744     | 0.597  | 0.223  |
| A024602_01 | At3g57050 | cystathionine beta-lyase precursor (CBL); protein id      | 0.091     | -0.158    | 0.027  | 0.587  |
| A024603_01 | At2g25790 | leucine-rich repeat transmembrane protein kinase, p       | -0.1      | 0.079     | 0.216  | 0.061  |
| A024604_01 | At3g63000 | putative protein; protein id: At3g63000.1                 | -0.427    | -0.488    | 0.081  | -0.079 |
| A024605_01 | At2g27910 | unknown protein; protein id: At2g27910.1                  | 0.149     | 0.168     | 0.207  | 0.639  |
| A024606_01 | At1g68000 | phosphatidylinositol synthase (PIS1); protein id: At1     | -0.449 NA |           | -0.186 | -0.403 |
| A024607_01 | At1g74520 | AtHVA22a; protein id: At1g74520.1                         | 0.541     | 0.227     | 0.397  | 0.526  |
| A024608_01 | At2g01910 | unknown protein; protein id: At2g01910.1                  | -0.685    | -0.851    | -0.312 | -0.472 |
| A024609_01 | At4g25970 | putative phosphatidylserine decarboxylase; protein i      | -0.087    | -0.277    | -0.631 | -0.655 |
| A024610_01 | At4g19840 | lectin like protein; protein id: At4g19840.1              | -2.257    | -2.714    | -0.998 | -2.266 |
| A024611_01 | At4g31550 | putative putaive DNA-binding protein                      | -0.609    | -0.876    | -0.879 | -1.638 |
| A024612_01 | At5g53160 | putative protein; protein id: At5g53160.1                 | -1.199    | -1.418    | -1.23  | -1.539 |
| A024613_01 | At5g42030 | putative protein; protein id: At5g42030.1                 | -0.168    | -0.196    | 0.042  | -0.239 |
| A024614_01 | At1g01320 | hypothetical protein; protein id: At1g01320.1             | -0.132    | -0.438 NA |        | -0.758 |
| A024615_01 | At1g56700 | expressed protein; protein id: At1g56700.1                | -0.109    | -0.316    | 0.192  | 0.318  |
| A024616_01 | At2g24060 | putative chloroplast initiation factor 3; protein id: At2 | 0.229     | 0.329     | 0.299  | 0.268  |
| A024617_01 | At1g49240 | actin 8; protein id: At1g49240.1                          | 0.017     | 0.076     | 0.042  | 0.062  |
| A024620_01 | At4g24690 | putative protein                                          | -1.093    | -0.699    | -0.855 | -0.886 |
| A024621_01 | At2g46330 | arabinogalactan-protein (AGP16); protein id: At2g46       | 0.851 NA  |           | 0.264  | -0.549 |
| A024622_01 | At2g18960 | plasma membrane proton ATPase (PMA); protein ic           | -1        | -1.108    | -0.69  | -0.526 |
| A024624_01 | At1g16890 | E2, ubiquitin-conjugating enzyme, putative; protein i     | -0.692    | -0.837    | -0.208 | -0.623 |
| A024626_01 | At1g30440 | non-phototropic hypocotyl, putative; protein id: At1g     | 1.061     | 0.195     | 0.15   | 0.569  |
| A024627_01 | At1g03130 | putative photosystem I reaction center subunit II pre     | -0.469    | -0.875    | -0.521 | -1.45  |
| A024628_01 | At5g66910 | disease resistance protein (CC-NBS-LRR class), pu NA      |           | -0.644 NA |        | -0.322 |
| A024629_01 | At4g35830 | unknown protein                                           | -0.394    | -0.439    | -0.643 | -0.713 |
| A024630_01 | At1g18540 | 60S ribosomal protein L6, putative; protein id: At1g1     | 0.936 NA  |           | 0.681  | 1.006  |
| A024631_01 | At5g44860 | putative protein; protein id: At5g44860.1                 | 0.12      | 0.041     | 0.218  | 0.253  |
| A024632_01 | At4g29130 | hexokinase; protein id: At4g29130.1                       | 0.527     | 0.344     | 0.506  | 1.022  |
| A024633_01 | At1g66180 | expressed protein; protein id: At1g66180.1                | 1.174     | 1.122     | 0.246  | 0.626  |
| A024634_01 | At1g03630 | putative protochlorophyllide reductase; protein id: A     | 0.319     | 0.152     | -0.533 | -0.262 |
| A024635_01 | At1g79560 | FtsH protease, putative; protein id: At1g79560.1          | 1.381     | 1.119     | 0.889  | 1.057  |
| A024636_01 | At1g23310 | putative alanine aminotransferase; protein id: At1g2      | -1.523    | -1.791    | -1.278 | -1.474 |
| A024637_01 | At1g48830 | 40S ribosomal protein S7 homolog, putative; proteir       | 0.762     | 0.689     | 0.602  | 1.05   |
| A024638_01 | At1g08450 | calreticulin, putative; protein id: At1g08450.1           | -0.435    | -0.635    | -0.387 | -0.105 |
| A024640_01 | At2g19480 | putative nucleosome assembly protein; protein id: A       | 0.093     | -0.331    | -0.086 | 0.113  |
| A024642_01 | At2g01420 | PIN4; putative auxin transport protein; protein id: At    | -1.484    | -1.127    | -0.62  | -1.232 |
| A024644_01 | At3g49910 | 60S RIBOSOMAL PROTEIN - like; protein id: At3g4           | 0.881     | 0.835     | 0.73   | 0.258  |
| A024645_01 | At4g35860 | putative GTP-binding protein GB2                          | -0.787    | -0.5      | -0.275 | -0.674 |

|            |           |                                                        |        |        |        |        |
|------------|-----------|--------------------------------------------------------|--------|--------|--------|--------|
| A024646_01 | At2g35330 | unknown protein; protein id: At2g35330.1               | 0.173  | 0.05   | NA     | -0.227 |
| A024647_01 | At3g28860 | multidrug resistance P-glycoprotein, putative; protei  | 1.215  | 1.196  | 1.198  | 1.596  |
| A024648_01 | At5g07370 | protein id: At5g07370.1                                | -0.559 | -0.593 | -0.387 | -0.262 |
| A024649_01 | At1g29670 | lipase/hydrolase, putative; protein id: At1g29670.1    | 0.402  | 0.341  | -0.031 | 0.223  |
| A024650_01 | At2g41560 | potential calcium-transporting ATPase 4, plasma m      | -0.002 | 0.089  | -0.506 | -1.204 |
| A024651_01 | At3g54110 | uncoupling protein (ucp/PUMP); protein id: At3g541     | 0.645  | 0.486  | 0.295  | 0.228  |
| A024652_01 | At1g27450 | adenine phosphoribosyltransferase 1, APRT; protei      | 0.886  | 0.646  | 0.685  | 1.259  |
| A024653_01 | At5g59700 | receptor-like protein kinase precursor - like; protein | -0.77  | NA     | -0.922 | -1.13  |
| A024656_01 | At4g32850 | putative poly(A) polymerase; protein id: At4g32850.    | -0.038 | -0.513 | -0.638 | -0.947 |
| A024657_01 | At2g17360 | putative ribosomal protein S4; protein id: At2g17360   | 0.674  | 0.421  | 0.354  | 0.84   |
| A024658_01 | At4g36860 | putative protein; protein id: At4g36860.1              | -0.107 | -0.452 | -0.623 | -0.359 |
| A024659_01 | At3g10860 | putative ubiquinol-cytochrome C reductase complex      | 0.12   | NA     | 0.43   | -0.11  |
| A024661_01 | At5g45710 | heat shock transcription factor; protein id: At5g4571  | -0.602 | -0.821 | -0.413 | -0.71  |
| A024663_01 | At1g14370 | protein kinase; protein id: At1g14370.1                | -2.557 | NA     | -1.509 | -2.655 |
| A024664_01 | At3g10450 | putative glucose acyltransferase; protein id: At3g10.  | -2.319 | -2.194 | -1.655 | -1.622 |
| A024665_01 | At5g58800 | quinone reductase family; protein id: At5g58800.1      | -0.934 | -1.039 | -0.582 | -0.871 |
| A024666_01 | At5g56170 | putative protein; protein id: At5g56170.1              | 0.18   | 0.002  | -0.016 | -0.179 |
| A024667_01 | At3g05970 | putative long-chain-fatty-acid--CoA ligase; protein id | -0.287 | -0.536 | -0.4   | -0.687 |
| A024669_01 | At5g13430 | ubiquinol--cytochrome-c reductase - like protein; prc  | 0.091  | NA     | 0.156  | 0.079  |
| A024670_01 | At2g37220 | chloroplast RNA-binding protein cp29, putative; prot   | 0.403  | 0.742  | 0.127  | 0.297  |
| A024671_01 | At3g13940 | unknown protein; protein id: At3g13940.1               | 0.492  | 0.762  | 0.697  | 0.938  |
| A024672_01 | At4g24280 | putative hsp 70 protein                                | 0.353  | 0.248  | -0.511 | 0.054  |
| A024673_01 | At3g59760 | cysteine synthase; protein id: At3g59760.1             | 1.418  | 1.235  | 1.166  | 1.767  |
| A024674_01 | At5g28050 | putative cytidine deaminase-like protein               | -0.636 | -0.763 | -0.002 | -0.057 |
| A024675_01 | At4g27780 | putative acyl-CoA binding protein; protein id: At4g27  | -0.346 | -0.776 | -0.089 | -0.352 |
| A024676_01 | At4g04620 | AtAPG8b; putative symbiosis-related protein; protei    | -1.295 | -1.368 | -0.564 | -1.119 |
| A024677_01 | At5g66190 | ferredoxin-NADP+ reductase; protein id: At5g66190      | -0.304 | -0.263 | -0.67  | -0.667 |
| A024678_01 | At1g07360 | RRM-containing RNA-binding protein, putative; prot NA  |        | 0.138  | NA     | -0.078 |
| A024680_01 | At5g54270 | light-harvesting chlorophyll a/b binding protein, puta | 0.037  | -0.24  | -0.094 | -0.144 |
| A024681_01 | At2g23350 | polyadenylate-binding protein (PABP), putative; proi   | 1.051  | 0.817  | 0.422  | 0.553  |
| A024682_01 | At5g40890 | CLC-a chloride channel protein; protein id: At5g408    | -1.217 | -1.338 | -1.639 | -2.088 |
| A024684_01 | At4g28480 | heat-shock protein; protein id: At4g28480.1            | -0.387 | -0.315 | 0.058  | 0.388  |
| A024686_01 | At3g60830 | actin - like protein; protein id: At3g60830.1          | 0.538  | NA     | 0.42   | 0.451  |
| A024687_01 | At1g52190 | peptide transporter, putative; protein id: At1g52190.  | 0.795  | 0.612  | 0.448  | 0.581  |
| A024689_01 | At5g48160 | putative protein; protein id: At5g48160.1              | -0.833 | -1.117 | -1.036 | -1.258 |
| A024690_01 | At5g38410 | ribulose biphosphate carboxylase small chain 3b p      | 0.044  | -0.376 | 0.001  | -0.149 |
| A024694_01 | At3g51895 | sulfate transporter ATST1; protein id: At3g51895.1     | 0.245  | 0.391  | 0.703  | 0.413  |
| A024699_01 | At1g05300 | putative zinc transporter; protein id: At1g05300.1     | NA     | NA     | NA     | NA     |
| A024718_01 | At1g11480 | expressed protein; protein id: At1g11480.1             | -0.273 | -0.603 | NA     | -0.815 |
| A024719_01 | At3g06440 | expressed protein; protein id: At3g06440.1             | 0.303  | NA     | NA     | 0.353  |
| A024720_01 | At3g26920 | F-box protein; protein id: At3g26920.1                 | -0.231 | -0.007 | -0.032 | 0.298  |
| A024724_01 | At5g60140 | putative protein; protein id: At5g60140.1              | 0.808  | 0.616  | 0.874  | 1.209  |
| A024725_01 | At5g50150 | putative protein; protein id: At5g50150.1              | 0.95   | 0.82   | 0.81   | 1.159  |
| A024728_01 | At5g05210 | putative protein; protein id: At5g05210.1              | 0.34   | -0.208 | 0.045  | 0.193  |
| A024749_01 | At5g62620 | putative protein; protein id: At5g62620.1              | -0.28  | NA     | NA     | -0.224 |
| A024778_01 | At1g04510 | putative pre-mRNA splicing factor PRP19; protein ic    | 0.47   | 0.245  | 0.321  | 0.16   |
| A024780_01 | At5g21010 | hypothetical protein (fragment); protein id: At5g2101  | -0.093 | NA     | -0.047 | -0.369 |
| A024783_01 | At5g01220 | putative protein; protein id: At5g01220.1              | 0.808  | 0.64   | 0.343  | 0.976  |
| A024784_01 | At3g56580 | expressed protein; protein id: At3g56580.1             | 0.065  | NA     | 0.283  | 0.186  |
| A024785_01 | At1g48610 | regulatory protein HAL3B; protein id: At1g48610.1      | 1.385  | 1.387  | 1.022  | 1.782  |
| A024786_01 | At2g35520 | defender against cell death protein; protein id: At2g: | 0.787  | 0.722  | 0.569  | 0.273  |
| A024788_01 | At2g16350 | expressed protein; protein id: At2g16350.1             | -0.358 | -0.182 | -1.215 | -0.594 |
| A024789_01 | xxxx      | No hits found                                          | -0.509 | -0.256 | -0.766 | -0.242 |
| A024790_01 | At1g56280 | expressed protein; protein id: At1g56280.1             | -1.086 | -1.574 | -0.357 | -0.092 |
| A024791_01 | At4g26520 | fructose-bisphosphate aldolase; protein id: At4g265    | 0      | 0.292  | -0.207 | -0.237 |
| A024794_01 | At4g17950 | putative protein; protein id: At4g17950.1              | 0.099  | -0.252 | 0.147  | 0.056  |
| A024795_01 | At5g26751 | shaggy-like kinase alpha; protein id: At5g26751.1      | -0.454 | NA     | -0.143 | 0.04   |
| A024822_01 | At3g46520 | A.t. DNA chromosome 3, BAC clone T23J7, actin 1:       | -0.549 | -0.565 | -0.91  | -1.13  |
| A024841_01 | At3g61220 | putative protein; protein id: At3g61220.1              | NA     | NA     | -1.014 | -1.548 |
| A024854_01 | At3g59360 | transporter-like protein; protein id: At3g59360.1      | -0.081 | NA     | -0.398 | -0.43  |
| A024856_01 | At1g52030 | myosinase binding protein, putative; protein id: At1   | 1.928  | 1.609  | 1.57   | 2.111  |
| A024862_01 | At5g09690 | putative protein; protein id: At5g09690.1              | -0.887 | -1.112 | -0.416 | -0.958 |
| A024863_01 | At5g56000 | heat shock protein (emb)CAA72514.1); protein id: A     | 0.672  | 0.535  | 0.714  | 1.313  |
| A024872_01 | At4g18210 | putative protein; protein id: At4g18210.1              | NA     | NA     | NA     | NA     |
| A024873_01 | At4g18220 | putative protein; protein id: At4g18220.1              | NA     | NA     | -0.913 | -1.989 |
| A024876_01 | At4g17950 | putative protein; protein id: At4g17950.1              | 0.431  | -0.027 | 0.372  | 0.223  |
| A024881_01 | At4g35010 | glycosyl hydrolase family 35 (beta-galactosidase); p   | -0.329 | -0.684 | NA     | NA     |
| A024886_01 | At4g30910 | leucyl aminopeptidase - like protein; protein id: At4g | -0.343 | 0.027  | 0.106  | -0.101 |

|            |               |                                                                                               |        |    |        |        |        |
|------------|---------------|-----------------------------------------------------------------------------------------------|--------|----|--------|--------|--------|
| A024890_01 | At4g23180     | serine/threonine kinase -like protein; protein id: At4g23180.1                                | -1.048 | NA | -1.166 | NA     |        |
| A024913_01 | At4g32390     | putative protein; protein id: At4g32390.1                                                     | 0.883  |    | 0.509  | 0.645  | 0.733  |
| A024975_01 | xxxx          | b/t similar to receptor-like protein kinase precursor; protein id: At4g00710.1                | 0.293  |    | 0.305  | NA     | 0.028  |
| A024976_01 | At4g00710     | hypothetical protein; protein id: At4g00710.1                                                 | 0.171  | NA |        | 0.578  | 0.847  |
| A024978_01 | At4g01560     | expressed protein; protein id: At4g01560.1                                                    | 0.667  |    | 0.617  | 0.712  | 0.843  |
| A024993_01 | At4g04910     | putative component of vesicle-mediated transport; protein id: At4g04910.1                     | 0.71   |    | 0.594  | 0.39   | 0.605  |
| A025018_01 | At4g15380     | cytochrome p450 family; protein id: At4g15380.1                                               | -0.639 |    | -1.234 | -0.38  | -0.591 |
| A025019_01 | At4g16950     | disease resistance protein, RPP5-like (TIR-NBS-LR class), putative; protein id: At4g16950.1   |        | NA |        | -1.089 | -1.216 |
| A025036_01 | At3g62740     | glycosyl hydrolase family 1; protein id: At3g62740.1                                          | -1.176 | NA |        | -1.181 | -1.262 |
| A025053_01 | At5g12950     | putative protein; protein id: At5g12950.1                                                     |        | NA |        | NA     | -1.048 |
| A025058_01 | At5g02490     | DnaK-type molecular chaperone hsc70.1 - like; protein id: At5g02490.1                         | 0.212  |    | -0.058 | 0.756  | 0.845  |
| A025060_01 | At3g44300     | nitrilase 2; protein id: At3g44300.1                                                          | -4.457 |    | -5.03  | -2.849 | -4.055 |
| A025061_01 | At3g28100     | unknown protein; protein id: At3g28100.1                                                      | -3.373 |    | -3.396 | -3.072 | -2.955 |
| A025074_01 | At3g17410     | putative protein kinase; protein id: At3g17410.1                                              | -1.04  |    | -0.682 | -0.164 | -0.801 |
| A025076_01 | At3g27380     | succinate dehydrogenase iron-protein subunit, putative; protein id: At3g27380.1               | 0.08   |    | -0.262 | 0.193  | 0.024  |
| A025079_01 | At3g24900     | disease resistance protein family (LRR); protein id: At3g24900.1                              | -0.064 | NA |        | NA     | NA     |
| A025085_01 | At5g11230     | putative protein; protein id: At5g11230.1                                                     | 0.741  |    | 0.635  | 0.864  | 1      |
| A025092_01 | At3g20940     | cytochrome P450, putative; protein id: At3g20940.1                                            | -1.389 |    | -0.973 | NA     | NA     |
| A025101_01 | At5g16340     | AMP-binding protein; protein id: At5g16340.1                                                  | -0.721 |    | -0.843 | -0.358 | -0.662 |
| A025116_01 | At3g20100     | cytochrome p450 family; protein id: At3g20100.1                                               |        | NA | -0.528 | 0.043  | 0.119  |
| A025130_01 | At5g37600     | glutamate--ammonia ligase; protein id: At5g37600.1                                            | -0.037 |    | -0.487 | -0.222 | -0.187 |
| A025131_01 | At5g37710     | putative calmodulin-binding heat-shock protein; protein id: At5g37710.1                       | -0.02  |    | 0.072  | -0.088 | 0.006  |
| A025148_01 | At3g15980     | putative coatomer complex subunit; protein id: At3g15980.1                                    | 0.886  |    | 0.669  | NA     | 0.331  |
| A025176_01 | At3g13400     | pectinesterase (pectin methylesterase) family; protein id: At3g13400.1                        | -0.434 |    | -0.939 | -0.702 | -1.43  |
| A025188_01 | At5g66680     | dolichyl-di-phosphooligosaccharide-protein glycotransferase; protein id: At5g66680.1          | 0.633  |    | 0.325  | 0.395  | 0.369  |
| A025190_01 | At5g38540     | myosinase binding protein-like; similar to jasmonate-binding protein; protein id: At5g38540.1 | 1.977  |    | 1.548  | 1.39   | 1.916  |
| A025206_01 | At5g52560     | unknown protein; protein id: At5g52560.1                                                      | -0.262 |    | -0.745 | -0.314 | -0.135 |
| A025211_01 | At5g06640     | putative protein; protein id: At5g06640.1                                                     | -1.123 |    | -1.328 | NA     | NA     |
| A025242_01 | At5g17000     | quinone oxidoreductase - like protein; protein id: At5g17000.1                                | 0.036  |    | -0.439 | NA     | -0.51  |
| A025254_01 | At1g32230     | expressed protein; protein id: At1g32230.1                                                    | -0.638 |    | -0.903 | -0.696 | -0.691 |
| A025261_01 | At1g65660     | step II splicing factor, putative; protein id: At1g65660.1                                    | 0.102  |    | -0.592 | -0.38  | -0.32  |
| A025268_01 | At1g08930     | zinc finger protein ATZF1, putative; protein id: At1g08930.1                                  | -1.456 | NA |        | -1.993 | -2.86  |
| A025273_01 | At5g19990     | 26S proteasome AAA-ATPase subunit RPT6a; protein id: At5g19990.1                              | 0.202  |    | 0.284  | 0.314  | 0.753  |
| A025274_01 | At3g51430     | strictosidine synthase-related; protein id: At3g51430.1                                       | -1.78  |    | -1.77  | -0.698 | -1.634 |
| A025287_01 | At1g62020     | coatomer alpha subunit, putative; protein id: At1g62020.1                                     | 0.616  |    | 0.275  | 0.473  | 0.517  |
| A025301_01 | At2g29720     | monooxygenase family; protein id: At2g29720.1                                                 | -0.314 |    | -0.32  | -0.267 | -0.372 |
| A025313_01 | At1g76680     | 12-oxophytodienoate reductase (OPR1); protein id: At1g76680.1                                 | -1.167 |    | -1.301 | NA     | NA     |
| A025335_01 | At5g53000     | PP2A regulatory subunit; protein id: At5g53000.1                                              | -0.066 |    | -0.081 | NA     | 0.178  |
| A025341_01 | At1g27540     | unknown protein; protein id: At1g27540.1                                                      | -0.13  |    | -0.533 | -0.047 | 0.149  |
| A025351_01 | At1g79950     | hypothetical protein; protein id: At1g79950.1                                                 | 0.426  |    | 0.356  | NA     | 0.681  |
| A025353_01 | At1g53750     | 26S proteasome AAA-ATPase subunit RPT1a; protein id: At1g53750.1                              | -0.147 |    | -0.253 | -0.388 | -0.252 |
| A025368_01 | At1g52030     | myosinase binding protein, putative; protein id: At1g52030.1                                  | 2.083  |    | 1.22   | 1.437  | 2.536  |
| A025372_01 | At5g35450     | disease resistance protein (CC-NBS-LRR class), putative; protein id: At5g35450.1              | -1.339 |    | -1.511 | NA     | -1.794 |
| A025376_01 | At2g47250     | putative pre-mRNA splicing factor RNA helicase; protein id: At2g47250.1                       | 0.3    |    | 0.075  | 0.13   | 0.422  |
| A025393_01 | At2g44560     | glycosyl hydrolase family 9; protein id: At2g44560.1                                          | -0.315 |    | -0.41  | NA     | NA     |
| A025394_01 | not annotated | Chr4 C/8472579-8472648                                                                        | -1.139 |    | -1.256 | -0.52  | -0.633 |
| A025397_01 | At2g23010     | putative serine carboxypeptidase I; protein id: At2g23010.1                                   | 1.736  |    | 1.192  | 0.721  | 1.268  |
| A025403_01 | At2g29340     | putative tropinone reductase; protein id: At2g29340.1                                         | -0.888 |    | -0.764 | -0.55  | -0.412 |
| A025406_01 | At2g32530     | putative cellulose synthase; protein id: At2g32530.1                                          |        | NA |        | -2.057 | NA     |
| A025408_01 | At2g22920     | putative serine carboxypeptidase I; protein id: At2g22920.1                                   | -0.524 |    | -1.687 | -2.162 | -1.981 |
| A025418_01 | At2g29730     | putative flavonol 3-O-glucosyltransferase; protein id: At2g29730.1                            | 0.802  |    | 0.475  | NA     | 0.372  |
| A025456_01 | At2g24360     | putative protein kinase; protein id: At2g24360.1                                              | -0.545 | NA |        | -0.197 | -0.513 |
| A025462_01 | At2g21250     | mannose 6-phosphate reductase (NADPH-dependent); protein id: At2g21250.1                      | 0.356  |    | 0.166  | 0.175  | 0.323  |
| A025468_01 | At2g35840     | expressed protein; protein id: At2g35840.1                                                    | -0.61  |    | -0.655 | -0.253 | -0.111 |
| A025469_01 | At2g35860     | unknown protein; protein id: At2g35860.1                                                      | 0.05   |    | 0.238  | 0.366  | 0.505  |
| A025479_01 | At2g42580     | expressed protein; protein id: At2g42580.1                                                    | 0.974  | NA |        | 0.192  | 0.304  |
| A025487_01 | At2g22240     | putative myo-inositol 1-phosphate synthase; protein id: At2g22240.1                           | 0.645  |    | 0.548  | 0.584  | 1.077  |
| A025502_01 | At1g64760     | glycosyl hydrolase family 17; protein id: At1g64760.1                                         | 1.441  |    | 1.353  | 0.775  | 0.695  |
| A025513_01 | At1g63400     | PPR-repeat protein; protein id: At1g63400.1                                                   | 0.348  |    | 0.439  | NA     | 0.167  |
| A025519_01 | At1g55930     | unknown protein; protein id: At1g55930.1                                                      | 0.083  |    | 0.236  | NA     | 0.603  |
| A025522_01 | At1g17580     | myosin, putative; protein id: At1g17580.1                                                     | -0.212 |    | -0.584 | -0.154 | -0.188 |
| A025542_01 | At1g29310     | flower pigmentation protein ATAN11; protein id: At1g29310.1                                   | 0.875  |    | 0.732  | 0.739  | 1.25   |
| A025582_01 | At1g61310     | disease resistance protein (CC-NBS-LRR class), putative; protein id: At1g61310.1              | -0.37  | NA |        | NA     | -0.794 |
| A025585_01 | At1g63370     | flavin-binding monooxygenase, putative; protein id: At1g63370.1                               | -0.574 | NA |        | NA     | -0.966 |
| A025587_01 | At1g65660     | step II splicing factor, putative; protein id: At1g65660.1                                    | -0.218 | NA |        | -1.006 | -0.752 |
| A025588_01 | At1g28610     | lipase, putative; protein id: At1g28610.1                                                     | -1.167 |    | -1.536 | -1.942 | -2.354 |
| A025590_01 | xxxx          | b/t polyprotein, putative; protein id: At1g42375.1                                            | 0.301  |    | 0.363  | 0.772  | 0.683  |
| A025600_01 | At1g08210     | expressed protein; protein id: At1g08210.1                                                    | 0.674  |    | 0.615  | 0.357  | 0.442  |

|            |           |                                                           |        |        |        |        |
|------------|-----------|-----------------------------------------------------------|--------|--------|--------|--------|
| A025603_01 | xxxx      | b/t transcription factor IIA large subunit; protein id: A | -0.435 | -0.24  | -0.027 | 0.522  |
| A025613_01 | At1g73460 | hypothetical protein; protein id: At1g73460.1             | 0.124  | 0.032  | 0.126  | 0.251  |
| A025618_01 | At5g25780 | eukaryotic translation initiation factor 3b (eIF3b/PRT    | 0.654  | 0.399  | -0.006 | 0.182  |
| A025621_01 | At1g10720 | expressed protein; protein id: At1g10720.1                | -0.217 | NA     | NA     | -0.168 |
| A025639_01 | At1g31820 | amino acid permease, putative; protein id: At1g318; NA    | NA     | NA     | NA     | NA     |
| A025644_01 | At1g56280 | expressed protein; protein id: At1g56280.1                | -1.089 | -1.353 | -0.573 | -0.296 |
| A025645_01 | At3g11250 | 60S acidic ribosomal protein, putative; protein id: At    | 0.892  | 0.84   | 0.822  | 0.969  |
| A025683_01 | At1g68740 | putative receptor protein; protein id: At1g68740.1        | -0.704 | -0.415 | 0.297  | 0.951  |
| A025697_01 | At3g01340 | transport protein SEC13, putative; protein id: At3g0      | -0.236 | -0.19  | -0.046 | -0.087 |
| A025712_01 | At5g25100 | putative multispanning membrane protein                   | 0.518  | NA     | 0.239  | 0.095  |
| A025718_01 | At4g31800 | WRKY family transcription factor; protein id: At4g31      | -0.63  | NA     | -0.32  | -0.252 |
| A025719_01 | At4g34090 | expressed protein; protein id: At4g34090.1                | 0.504  | 0.349  | -0.212 | -0.275 |
| A025727_01 | At4g37560 | formamidase - like protein; protein id: At4g37560.1       | -3.068 | -2.936 | -1.761 | -1.158 |
| A025728_01 | At1g04900 | expressed protein; protein id: At1g04900.1                | 1.187  | NA     | 0.807  | 1.526  |
| A025730_01 | At5g18620 | chromatin remodelling complex ATPase chain ISWI           | 0.873  | 0.648  | NA     | 0.842  |
| A025733_01 | At1g60810 | ATP citrate-lyase, putative; protein id: At1g60810.1      | 0.224  | 0.231  | 0.297  | 0.333  |
| A025735_01 | At1g60780 | clathrin adaptor medium chain protein MU1B, putati        | 0.31   | 0.122  | 0.349  | 0.54   |
| A025739_01 | At1g73310 | putative serine carboxypeptidase; protein id: At1g73      | -2.207 | -2.481 | NA     | -2.101 |
| A025740_01 | At1g73290 | putative serine carboxypeptidase; protein id: At1g73      | NA     | NA     | NA     | NA     |
| A025747_01 | At1g51710 | ubiquitin-specific protease 6 (UBP6), putative; prote     | 0.053  | NA     | -0.584 | -0.349 |
| A025758_01 | At2g33600 | putative cinnamoyl-CoA reductase; protein id: At2g3       | 1.015  | 0.746  | 0.294  | 0.118  |
| A025759_01 | At2g22980 | putative serine carboxypeptidase I; protein id: At2g2     | -1.322 | NA     | -2.258 | -2.83  |
| A025762_01 | At1g23900 | gamma-adaptin, putative; protein id: At1g23900.1          | 1.106  | 0.899  | NA     | 0.7    |
| A025765_01 | At1g78850 | glycoprotein(EP1), putative; protein id: At1g78850.1      | NA     | NA     | NA     | NA     |
| A025767_01 | At1g04430 | ankyrin-like protein; protein id: At1g04430.1             | -0.596 | 0.497  | -0.456 | 0.032  |
| A025768_01 | At2g33590 | putative cinnamoyl-CoA reductase; protein id: At2g3       | -0.846 | -1.279 | -0.661 | -1.304 |
| A025769_01 | At4g34030 | putative protein; protein id: At4g34030.1                 | -0.824 | -1.209 | -1.196 | -1.591 |
| A025770_01 | At3g14690 | cytochrome P450, putative; protein id: At3g14690.1        | -1.187 | NA     | -0.739 | -0.987 |
| A025772_01 | At4g26530 | fructose-bisphosphate aldolase - like protein; protei     | -0.38  | 0.035  | -1.101 | -1.077 |
| A025776_01 | At5g39320 | UDP-glucose dehydrogenase-like protein; protein           | 1.199  | NA     | 0.302  | 0.997  |
| A025777_01 | At4g34030 | putative protein; protein id: At4g34030.1                 | -1.011 | NA     | -1.268 | -1.62  |
| A025778_01 | At5g07410 | pectinesterase family; protein id: At5g07410.1            | -0.408 | NA     | -0.442 | -0.458 |
| A025780_01 | At3g13772 | endomembrane protein 70, putative; protein id: At3g       | -0.064 | NA     | -0.668 | -0.565 |
| A025785_01 | At5g63680 | pyruvate kinase; protein id: At5g63680.1                  | 0.509  | 0.315  | 0.432  | 0.608  |
| A025787_01 | At3g05165 | expressed protein; protein id: At3g05165.1                | -1.098 | -1.785 | -1.357 | -1.734 |
| A025788_01 | At3g14415 | glycolate oxidase; protein id: At3g14415.1                | -1.267 | -1.402 | -0.964 | -0.987 |
| A025795_01 | At3g52180 | putative protein; protein id: At3g52180.1                 | 1.074  | 0.809  | 0.331  | 0.752  |
| A025798_01 | At1g12780 | uridine diphosphate glucose epimerase; protein id: u      | -1.884 | -2.442 | -1.59  | -1.639 |
| A025799_01 | At2g45960 | aquaporin (plasma membrane intrinsic protein 1B);         | -0.674 | -0.652 | -0.04  | 0.332  |
| A025803_01 | At5g07340 | calnexin homolog; protein id: At5g07340.1                 | 0.861  | 0.488  | 0.746  | 0.715  |
| A025804_01 | At4g22350 | putative protein; protein id: At4g22350.1                 | 0.362  | 0.066  | 0.047  | -0.028 |
| A025807_01 | At5g01220 | putative protein; protein id: At5g01220.1                 | 0.804  | NA     | 0.24   | 1.189  |
| A025814_01 | At4g00430 | probable plasma membrane intrinsic protein 1c; pro        | 0.052  | -0.091 | -0.004 | -0.092 |
| A025818_01 | At3g57880 | anthranilate phosphoribosyltransferase-like protein;      | -0.592 | -0.635 | 0.084  | 0.154  |
| A025825_01 | At5g48620 | disease resistance protein (CC-NBS-LRR class), pu         | NA     | -1.431 | NA     | NA     |
| A025827_01 | At3g50820 | photosystem II oxygen-evolving complex 33 (OEC3           | -0.319 | -0.539 | -0.329 | -0.814 |
| A025828_01 | At1g66970 | unknown protein; protein id: At1g66970.1                  | NA     | NA     | -1.702 | NA     |
| A025844_01 | At1g15910 | transcriptional regulator, putative; protein id: At1g15   | 1.198  | 0.696  | 0.44   | 0.67   |
| A025846_01 | At2g46280 | eukaryotic translation initiation factor 3 delta subuni   | 0.058  | NA     | 0.232  | 0.453  |
| A025847_01 | At5g07440 | glutamate dehydrogenase 2; protein id: At5g07440.         | -0.715 | -0.852 | -0.612 | -1.324 |
| A025849_01 | At3g17820 | glutamine synthetase, putative; protein id: At3g1782      | 0.123  | NA     | 0.769  | 0.747  |
| A025861_01 | At1g04350 | putative 1-aminocyclopropane-1-carboxylate oxidas         | NA     | NA     | -1.148 | -1.17  |
| A025867_01 | At5g42240 | serine carboxypeptidase II-like; protein id: At5g4224     | 0.795  | 0.383  | 0.189  | 0.244  |
| A025868_01 | At5g17920 | 5-methyltetrahydropteroyltriglutamate--homocystein        | 0.453  | 0.115  | 0.247  | 0.668  |
| A025869_01 | At2g47030 | pectinesterase family; protein id: At2g47030.1            | -0.472 | -0.679 | -1.169 | -1.09  |
| A025870_01 | At4g14960 | tubulin alpha-6 chain (TUA6); protein id: At4g14960       | 0.76   | 0.448  | 0.318  | 0.666  |
| A025872_01 | At1g48600 | phosphoethanolamine N-methyltransferase, putative         | -0.574 | 0.486  | -0.393 | -0.327 |
| A025873_01 | At5g16970 | quinone oxidoreductase -like protein; protein id: At5     | NA     | NA     | -1.645 | -2.045 |
| A025874_01 | At5g16990 | quinone oxidoreductase - like protein; protein id: At5    | NA     | NA     | NA     | 0.034  |
| A025878_01 | At3g15880 | putative WD-repeat protein; protein id: At3g15880.1       | -0.406 | -0.511 | 0.304  | 0.256  |
| A025887_01 | At2g37180 | aquaporin (plasma membrane intrinsic protein 2C);         | 0.064  | -0.393 | -0.702 | -0.357 |
| A025896_01 | At3g46440 | dTDP-glucose 4-6-dehydratases-like protein; protei        | -0.107 | 0.053  | -0.486 | -0.324 |
| A025899_01 | At2g36460 | putative fructose bisphosphate aldolase; protein id:      | -0.171 | 0.233  | 0.021  | 0.054  |
| A025900_01 | At1g71890 | putative sucrose transport protein; protein id: At1g7     | 0.555  | 0.926  | 0.574  | 0.705  |
| A025901_01 | At1g45000 | 26S proteasome regulatory particle triple-A ATPase        | 0.467  | 0.435  | 0.219  | 0.612  |
| A025908_01 | At3g28715 | hypothetical protein; protein id: At3g28715.1             | -0.004 | -0.119 | -0.217 | 0.091  |
| A025909_01 | At2g26740 | epoxide hydrolase (ATsEH); protein id: At2g26740.1        | -1.197 | -1.015 | -0.48  | -1.083 |
| A025910_01 | At4g13930 | hydroxymethyltransferase; protein id: At4g13930.1,        | 0.417  | 0.317  | 0.34   | 0.571  |

|            |           |                                                            |        |        |        |        |
|------------|-----------|------------------------------------------------------------|--------|--------|--------|--------|
| A025911_01 | At4g23560 | glycosyl hydrolase family 9; protein id: At4g23560.1       | 1.163  | 0.564  | -0.471 | -0.443 |
| A025916_01 | At1g02305 | expressed protein; protein id: At1g02305.1                 | -0.283 | -1.293 | -1.133 | -1.202 |
| A025918_01 | At1g25141 | unknown protein; protein id: At1g25141.1                   | -0.341 | -0.188 | -0.023 | -0.052 |
| A025920_01 | At5g09810 | ACTIN 2/7 (sp P53492); protein id: At5g09810.1             | 0.362  | 0.184  | 0.111  | 0.831  |
| A025922_01 | At4g27830 | glycosyl hydrolase family 1; protein id: At4g27830.1       | -0.727 | -1.418 | -0.84  | -1.05  |
| A025924_01 | At4g30470 | cinnamoyl-CoA reductase - like protein; protein id: A      | -2.246 | -2.151 | -0.777 | -1.483 |
| A025929_01 | At3g49120 | peroxidase, putative; protein id: At3g49120.1              | 1.135  | 0.918  | 0.465  | 0.496  |
| A025931_01 | At2g41740 | putative villin 2; protein id: At2g41740.1                 | NA     | NA     | -1.111 | -0.522 |
| A025937_01 | At3g14650 | cytochrome P450, putative; protein id: At3g14650.1         | -0.497 | -0.606 | -0.396 | -1.115 |
| A025939_01 | At5g56650 | IAA-amino acid hydrolase homolog 1 precursor (sp           | 0.077  | -0.186 | -0.127 | 0.49   |
| A025941_01 | At1g01620 | plasma membrane intrinsic protein 1c, putative; pro        | -0.403 | -0.395 | -0.031 | -0.212 |
| A025942_01 | At3g52180 | putative protein; protein id: At3g52180.1                  | 0.841  | 0.647  | 0.259  | 0.656  |
| A025944_01 | At5g43060 | cysteine protease component of nftase-inhibitor coi        | -0.649 | NA     | NA     | -0.5   |
| A025947_01 | At1g72900 | disease resistance protein (TIR-NBS class), putativ        | -1.739 | NA     | NA     | -2.089 |
| A025949_01 | At3g14420 | glycolate oxidase, putative; protein id: At3g14420.1       | -0.97  | -1.358 | -0.635 | -0.712 |
| A025951_01 | At1g67680 | F12A21.17; protein id: At1g67680.1                         | 0.621  | 0.61   | 0.243  | 0.786  |
| A025956_01 | At2g37170 | aquaporin (plasma membrane intrinsic protein 2B);          | -0.185 | -0.252 | -0.339 | -0.789 |
| A025957_01 | At3g57290 | translation initiation factor 3 -like protein; protein id: | -0.001 | -0.004 | -0.051 | 0.43   |
| A025958_01 | At1g50010 | tubulin alpha-2/alpha-4 chain, putative; protein id: A     | 0.728  | 0.905  | 0.739  | 0.865  |
| A025959_01 | At4g01850 | S-adenosylmethionine synthase 2; protein id: At4g0         | -0.082 | -0.205 | -0.192 | -0.38  |
| A025961_01 | At4g34180 | putative protein; protein id: At4g34180.1                  | -1.184 | -1.196 | -0.877 | -0.988 |
| A025962_01 | At1g20260 | vacuolar H+-ATPase subunit B, putative; protein id:        | 0.281  | -0.3   | -0.609 | -0.619 |
| A025963_01 | At1g07480 | transcription factor IIA large subunit; protein id: At1g   | -0.135 | -0.224 | 0.024  | -0.226 |
| A025965_01 | At1g17370 | oligouridylate binding protein (UBP1), putative; prote     | -0.373 | NA     | -0.433 | -0.628 |
| A025969_01 | At3g09630 | putative 60S ribosomal protein L1; protein id: At3g0       | 0.512  | 0.486  | 0.744  | 1.768  |
| A025970_01 | At5g08670 | expressed protein; protein id: At5g08670.1                 | 0.556  | 0.443  | 0.327  | 0.539  |
| A025971_01 | At1g08510 | acyl-(acyl carrier protein) thioesterase, putative; pro    | -0.573 | -0.711 | -0.576 | -0.74  |
| A025975_01 | At2g47040 | pectinesterase family; protein id: At2g47040.1             | -0.39  | NA     | NA     | -0.698 |
| A025978_01 | At1g12900 | putative calcium-binding protein, calreticulin; proteir    | 0.099  | NA     | -0.184 | -0.49  |
| A025984_01 | At1g20010 | beta tubulin 1, putative; protein id: At1g20010.1          | 1.621  | 1.389  | 0.547  | 0.945  |
| A025986_01 | At1g32230 | expressed protein; protein id: At1g32230.1                 | -0.458 | -0.546 | -0.426 | -0.599 |
| A025990_01 | At5g56030 | heat shock protein 81-2 (HSP81-2) (sp P55737); pro         | 0.716  | 0.422  | 0.877  | 1.447  |
| A025991_01 | At4g14880 | cytosolic O-acetylserine(thiol)lyase (EC 4.2.99.8); p      | -0.518 | -0.601 | -0.223 | 0.313  |
| A025992_01 | At4g05320 | polyubiquitin UBQ10/SEN3; protein id: At4g05320.1          | -1.135 | -1.68  | -0.416 | 0.071  |
| A025995_01 | At2g01670 | expressed protein; protein id: At2g01670.1                 | -1.072 | NA     | -0.715 | -0.997 |
| A025997_01 | At3g26180 | cytochrome p450 family; protein id: At3g26180.1            | -1.72  | NA     | -0.983 | -1.101 |
| A025998_01 | At1g02300 | cathepsin B-like cysteine protease, putative; protein      | -1.544 | -1.795 | -1.114 | -1.394 |
| A026002_01 | At5g07440 | glutamate dehydrogenase 2; protein id: At5g07440.          | -0.651 | -0.77  | -0.657 | -1.163 |
| A026004_01 | At5g48620 | disease resistance protein (CC-NBS-LRR class), pu          | -1.388 | -1.634 | -1.51  | -1.842 |
| A026013_01 | At1g20540 | hypothetical protein; protein id: At1g20540.1              | 0.792  | 0.537  | 0.328  | 0.605  |
| A026014_01 | At1g12430 | armadillo-repeat-containing kinesin-related protein;       | -0.081 | -0.163 | -0.017 | -0.086 |
| A026015_01 | At1g48410 | leaf development protein Argonaute; protein id: At1g       | 0.424  | -0.002 | 0.194  | 0.431  |
| A026017_01 | At1g24793 | F5A9.18; protein id: At1g24793.1                           | -0.172 | -0.161 | -0.184 | -0.005 |
| A026024_01 | At5g43660 | putative protein; protein id: At5g43660.1                  | -0.003 | 0.011  | 0.177  | 0.514  |
| A026026_01 | At1g69940 | pectinesterase family; protein id: At1g69940.1             | NA     | NA     | -0.554 | -0.427 |
| A026043_01 | At5g20620 | polyubiquitin (UBQ4); protein id: At5g20620.1              | -0.527 | -0.723 | -0.282 | -0.064 |
| A026057_01 | At3g44670 | disease resistance protein RPP1-Ws(A,C)-like (TIR          | -0.413 | -0.678 | -0.305 | -0.537 |
| A026062_01 | At3g12560 | myb-family transcription factor, putative; protein id: ,   | 0.243  | -0.291 | NA     | 0.213  |
| A026078_01 | At3g23280 | auxin-regulated protein; protein id: At3g23280.1           | -0.259 | -0.88  | -0.28  | -0.237 |
| A026081_01 | At4g37550 | formamidase - like protein; protein id: At4g37550.1        | -0.171 | -0.596 | -0.395 | -0.116 |
| A026082_01 | At3g03270 | expressed protein; protein id: At3g03270.1                 | -1.001 | -1.399 | -0.853 | -0.971 |
| A026083_01 | At5g18065 | hypothetical protein; protein id: At5g18065.1              | -0.321 | -0.213 | -0.095 | 0.084  |
| A026086_01 | At1g67840 | F12A21.3; protein id: At1g67840.1                          | -0.236 | NA     | -0.754 | -0.784 |
| A026087_01 | At1g02850 | glycosyl hydrolase family 1; protein id: At1g02850.1       | -0.806 | -0.906 | -0.386 | 0.036  |
| A026089_01 | At2g37660 | expressed protein; protein id: At2g37660.1                 | 1.279  | 0.93   | 0.497  | 0.557  |
| A000178_01 | At1g12520 | copper/zinc superoxide dismutase copper chaperon           | 0.621  | 0.742  | 0.76   | 1.06   |
| A000194_01 | At1g50380 | expressed protein; protein id: At1g50380.1                 | 0.086  | 0.21   | NA     | 0.277  |
| A000195_01 | At1g79160 | hypothetical protein; protein id: At1g79160.1              | -0.641 | -0.495 | NA     | -0.205 |
| A000463_01 | At1g66330 | expressed protein; protein id: At1g66330.1                 | -0.497 | NA     | -0.648 | -0.301 |
| A000605_01 | At1g61350 | expressed protein; protein id: At1g61350.1                 | 0.167  | 0.501  | 0.256  | 0.458  |
| A000683_01 | At1g77720 | putative protein kinase; protein id: At1g77720.1           | 0.89   | NA     | NA     | NA     |
| A000724_01 | At1g28090 | hypothetical protein; protein id: At1g28090.1              | 0.309  | 0.721  | NA     | 0.348  |
| A000790_01 | At1g68600 | expressed protein; protein id: At1g68600.1                 | -1.496 | -1.102 | -1.271 | -0.619 |
| A000902_01 | At1g58200 | unknown protein; protein id: At1g58200.1                   | -0.363 | -0.551 | -0.985 | -0.877 |
| A000979_01 | At1g54920 | expressed protein; protein id: At1g54920.1                 | -0.565 | -0.108 | -0.649 | -0.164 |
| A001111_01 | At1g27900 | ATP-dependent RNA helicase, putative; protein id: ,        | -0.31  | NA     | NA     | 0.043  |
| A001151_01 | At1g29700 | expressed protein; protein id: At1g29700.1                 | -0.714 | NA     | -0.912 | -1.004 |
| A001316_01 | At1g76550 | putative pyrophosphate-dependent phosphofructoki           | 0.148  | 0.542  | 0.411  | 0.503  |

|            |           |                                                         |        |        |        |        |
|------------|-----------|---------------------------------------------------------|--------|--------|--------|--------|
| A001383_01 | At1g16970 | expressed protein; protein id: At1g16970.1              | 0.381  | 0.4    | 0.396  | 0.778  |
| A001433_01 | At1g61180 | disease resistance protein (CC-NBS-LRR class), pu       | -0.236 | -0.237 | NA     | 0.051  |
| A001509_01 | At1g32180 | cellulose synthase catalytic subunit, putative; protei  | -0.419 | NA     | NA     |        |
| A001594_01 | At1g58470 | RRM-containing RNA-binding protein, putative; prot      | -0.635 | NA     |        | 0.172  |
| A001600_01 | At1g31940 | expressed protein; protein id: At1g31940.1              | -1.096 | -0.901 | -0.282 | -0.746 |
| A001888_01 | At1g51630 | unknown protein; protein id: At1g51630.1                | 0.584  | 0.686  | NA     | 0.843  |
| A002042_01 | At1g49410 | expressed protein; protein id: At1g49410.1              | 0.712  | 0.771  | 0.762  | 0.322  |
| A002060_01 | At1g50900 | expressed protein; protein id: At1g50900.1              | 0.174  | 0.326  | 0.363  | -0.005 |
| A002084_01 | At1g01470 | hypothetical protein; protein id: At1g01470.1           | -2.514 | NA     | NA     |        |
| A002107_01 | At1g11360 | expressed protein; protein id: At1g11360.1              | 0.144  | NA     | NA     | -0.267 |
| A002404_01 | At1g28280 | expressed protein; protein id: At1g28280.1              | -0.809 | NA     | NA     | -1.047 |
| A002434_01 | At1g49590 | unknown protein; protein id: At1g49590.1                | -0.596 | NA     | -0.049 | 0.019  |
| A002621_01 | At1g76280 | hypothetical protein; protein id: At1g76280.1           | -0.031 | NA     |        | 0.196  |
| A002778_01 | At1g31230 | putative aspartate kinase-homoserine dehydrogena        | 0.156  | -0.019 | NA     | 0.195  |
| A002947_01 | At1g30330 | auxin response transcription factor (ARF6); protein i   | 0.148  | 0.315  | 0.499  | 0.927  |
| A003123_01 | At1g19170 | polygalacturonase, putative; protein id: At1g19170.1    | -0.112 | NA     | -0.13  | 0.392  |
| A003140_01 | At1g56260 | hypothetical protein; protein id: At1g56260.1           | -0.827 | NA     |        | -1.198 |
| A003218_01 | At1g13820 | unknown protein; protein id: At1g13820.1                | -0.029 | NA     | -0.279 | -0.202 |
| A003526_01 | At1g69610 | unknown protein; protein id: At1g69610.1                | -2.535 | NA     | NA     |        |
| A003659_01 | At1g62640 | 3-ketoacyl-acyl carrier protein synthase III (KAS III); | 0.481  | NA     | 0.626  | 1.012  |
| A003766_01 | At1g31720 | hypothetical protein; protein id: At1g31720.1           | -0.781 | NA     | NA     |        |
| A003859_01 | At1g11850 | expressed protein; protein id: At1g11850.1              | 0.653  | 0.833  | 1.002  | 0.968  |
| A004129_01 | At1g33475 | similar to RRM-containing protein; protein id: At1g33   | 0.712  | 1.025  | 0.639  | 1.251  |
| A004135_01 | At1g24510 | T-complex chaperonin protein , epsilon subunit; pro     | -0.12  | 0.052  | -0.127 | 0.496  |
| A004159_01 | At1g19360 | expressed protein; protein id: At1g19360.1              | 0.288  | 0.281  | -0.437 | 0.174  |
| A004334_01 | At1g68470 | exostosin family; protein id: At1g68470.1               | -0.385 | NA     | -0.56  | -0.121 |
| A004387_01 | At1g60440 | pantothenate kinase, putative; protein id: At1g60440    | -0.478 | NA     |        | 0.031  |
| A004423_01 | At1g51610 | expressed protein; protein id: At1g51610.1              | 0.318  | 0.134  | -0.237 | 0.031  |
| A004572_01 | At1g11580 | pectin methylesterase, putative; protein id: At1g115    | -0.536 | NA     | -0.917 | -1.098 |
| A004660_01 | At1g11440 | similar to serine/threonine protein kinase embjCAA6     | -0.045 | NA     | -0.03  | -0.176 |
| A004672_01 | At1g01430 | hypothetical protein; protein id: At1g01430.1           | -0.591 | -0.385 | -0.279 | -0.154 |
| A004702_01 | At1g07750 | globulin-like protein; protein id: At1g07750.1          | -0.572 | NA     | 0.364  | 0.445  |
| A004773_01 | At1g60230 | expressed protein; protein id: At1g60230.1              | 0.395  | 0.344  | NA     | 0.486  |
| A005189_01 | At1g76405 | auxin-regulated protein; protein id: At1g76405.2        | 1.165  | 1.143  | 0.816  | 0.625  |
| A005374_01 | At5g10010 | hypothetical protein; protein id: At5g10010.1           | 0.692  | 0.776  | NA     | 0.696  |
| A005392_01 | At1g17950 | myb family transcription factor; protein id: At1g17950  | -3.387 | NA     | NA     |        |
| A005515_01 | At1g22970 | unknown protein; protein id: At1g22970.1                | -0.012 | 0.331  | 0.18   | 0.429  |
| A005561_01 | At5g18900 | putative protein; protein id: At5g18900.1               | -0.593 | NA     | -0.058 | -0.009 |
| A005682_01 | At1g53030 | cytochrome C oxidase assembly protein, putative; p      | -0.874 | NA     | -0.491 | -1.125 |
| A005848_01 | At2g24765 | ADP-ribosylation factor 3; protein id: At2g24765.1      | 0.421  | NA     | 0.498  | 0.416  |
| A006047_01 | At2g16630 | unknown protein; protein id: At2g16630.1                | 0.464  | NA     |        | 0.068  |
| A006139_01 | At2g25840 | putative tryptophanyl-tRNA synthetase; protein id: At   | 0.655  | NA     | 0.38   | 0.693  |
| A006166_01 | At2g46650 | putative cytochrome b5; protein id: At2g46650.1         | -2.113 | NA     | -0.697 | -1.904 |
| A006192_01 | At2g01260 | predicted by genscan and genefinder; protein id: At     | -0.796 | NA     |        | -0.244 |
| A006198_01 | At2g35440 | unknown protein; protein id: At2g35440.1                | 0.553  | 0.253  | 0.307  | 0.751  |
| A006299_01 | At2g35060 | putative potassium transporter; protein id: At2g3506    | -0.785 | NA     | -0.877 | -1.148 |
| A006359_01 | At2g36330 | hypothetical protein; protein id: At2g36330.1           | -0.668 | NA     |        | -0.794 |
| A006535_01 | At2g28230 | unknown protein; protein id: At2g28230.1                | 0.018  | NA     |        | -0.09  |
| A006561_01 | At2g07700 | putative retroelement pol polyprotein; protein id: At2  | -0.45  | NA     | NA     |        |
| A006584_01 | At2g07330 | mutator-like transposase; protein id: At2g07330.1       | -1.454 | NA     | NA     | -0.33  |
| A006587_01 | At2g03740 | putative cold-regulated protein; protein id: At2g0374   | -0.361 | NA     | NA     |        |
| A006588_01 | At2g03560 | F-box protein family, AtFBX7; protein id: At2g03560     | -0.487 | NA     |        | -0.236 |
| A006590_01 | At2g04940 | expressed protein; protein id: At2g04940.1              | -0.327 | NA     | 0.132  | 0.038  |
| A006602_01 | At2g07340 | expressed protein; protein id: At2g07340.1              | 0.145  | 0.237  | 0.434  | -0.051 |
| A006638_01 | At2g31350 | glyoxalase II, putative (hydroxyacylglutathione hydr    | -1.196 | NA     | -0.818 | -0.465 |
| A006655_01 | At2g18850 | unknown protein; protein id: At2g18850.1                | 0.223  | 0.299  | 0.432  | 1.008  |
| A006661_01 | At2g16890 | putative glucosyltransferase; protein id: At2g16890.    | -0.806 | NA     |        | -0.373 |
| A006741_01 | At2g46780 | RRM-containing protein; protein id: At2g46780.1         | -0.315 | NA     |        | -0.268 |
| A006970_01 | At2g19870 | hypothetical protein; protein id: At2g19870.1           | 0.345  | -0.12  | -0.038 | -0.289 |
| A007125_01 | At2g22370 | expressed protein; protein id: At2g22370.1              | -0.112 | 0.653  | 0.126  | 0.56   |
| A007270_01 | At2g27450 | putative nitrilase; protein id: At2g27450.1             | -0.034 | -0.101 | -0.112 | -0.164 |
| A007326_01 | At2g07050 | cycloartenol synthase ((S)-2,3-epoxysqualene muta       | 0.194  | 0.322  | 0.167  | 0.58   |
| A007344_01 | At2g17350 | expressed protein; protein id: At2g17350.1              | -0.525 | NA     | -0.093 | -0.854 |
| A007439_01 | At2g45370 | hypothetical protein; protein id: At2g45370.1           | -0.896 | -0.582 | NA     | -0.07  |
| A007540_01 | At2g28760 | putative nucleotide-sugar dehydratase; protein id: A    | 0.167  | NA     | -0.124 | 0.324  |
| A007611_01 | At2g32850 | putative serine threonine protein kinase; protein id: , | 0.15   | NA     |        | -0.138 |
| A007679_01 | At2g03720 | unknown protein; protein id: At2g03720.1                | -0.825 | 0.517  | NA     | 0.054  |
| A007700_01 | At2g39500 | expressed protein; protein id: At2g39500.1              | 0.198  | 0.828  | 0.682  | -0.066 |



|            |               |                                                           |           |           |           |        |
|------------|---------------|-----------------------------------------------------------|-----------|-----------|-----------|--------|
| A007742_01 | At2g35760     | snoRNA gene; protein id: At2g35760.1                      | 0.049     | -0.101    | 0.548     | 0.595  |
| A007802_01 | At2g13720     | unknown protein; protein id: At2g13720.1                  | -0.313 NA | NA        | NA        |        |
| A007819_01 | At2g28130     | hypothetical protein; protein id: At2g28130.1             | -0.864    | -0.673    | -0.623    | -0.219 |
| A007828_01 | At2g28120     | nodulin-like protein; protein id: At2g28120.1             | 0.124     | 0.866     | -0.214    | -1.228 |
| A007839_01 | At2g43270     | putative myb-related transcription factor; protein id:    | 0.906     | 1.299     | 0.598     | 0.233  |
| A007867_01 | At2g36900     | Golgi SNARE protein, putative; protein id: At2g36900      | -0.413    | -0.567    | -0.264    | -0.478 |
| A007882_01 | At2g33280     | hypothetical protein; protein id: At2g33280.1             | 0.209     | 0.344 NA  |           | 0.367  |
| A007997_01 | At2g24590     | putative RSZp22 splicing factor; protein id: At2g245      | 0.445     | 0.587     | 0.506     | 0.345  |
| A008030_01 | At2g35500     | expressed protein; protein id: At2g35500.1                | 0.358 NA  |           | 0.004     | 0.18   |
| A008034_01 | At2g35400     | unknown protein; protein id: At2g35400.1                  | -0.314 NA | NA        |           | -0.589 |
| A008278_01 | At2g14690     | glycosyl hydrolase family 10; protein id: At2g14690.      | -0.184 NA | NA        |           | -0.222 |
| A008284_01 | At2g29670     | expressed protein; protein id: At2g29670.1                | -0.197    | 0.116 NA  |           | -1.012 |
| A008609_01 | At2g33290     | similar to mammalian MHC III region protein G9a; p        | 0.422     | 0.653 NA  |           | 0.621  |
| A008620_01 | At2g17880     | putative DnaJ protein; protein id: At2g17880.1            | 0.943     | 0.891 NA  |           | 0.938  |
| A008712_01 | At2g31945     | expressed protein; protein id: At2g31945.1                | -3.463 NA |           | -1.349 NA |        |
| A008935_01 | At3g05910     | pectinacetyltransferase, putative; protein id: At3g05910  | 0.192     | 0.2       | -0.017    | 0.437  |
| A009025_01 | At3g55990     | putative protein; protein id: At3g55990.1                 | -1.061    | -1.543 NA |           | -0.958 |
| A009197_01 | xxxx          | b/t phosphoribosylformylglycinamide cyclo-ligase          | 0.04      | -0.189 NA |           | 0.094  |
| A009232_01 | At3g62370     | putative protein; protein id: At3g62370.1                 | 0.378     | 0.864     | 0.269     | 0.205  |
| A009254_01 | At3g44380     | putative protein; protein id: At3g44380.1                 | 0.125     | 0.449     | 0.588     | 0.583  |
| A009259_01 | At3g44450     | putative protein; protein id: At3g44450.1                 | -1.75     | -1.927 NA |           | NA     |
| A009332_01 | At3g18660     | expressed protein; protein id: At3g18660.1                | -1.996    | -2.492 NA |           | NA     |
| A009654_01 | At3g13110     | serine acetyltransferase (Sat-1); protein id: At3g131     | -0.505 NA |           | -0.002    | -0.07  |
| A009749_01 | At3g13490     | lysyl-tRNA synthetase, putative; protein id: At3g134      | -0.001    | 0.071     | 0.025     | -0.047 |
| A009945_01 | At3g09570     | unknown protein; protein id: At3g09570.1                  | -0.285 NA |           | -0.112    | -0.253 |
| A010046_01 | At3g42630     | putative protein; protein id: At3g42630.1                 | 0.1       | -0.119    | -0.243    | 0.365  |
| A010070_01 | At3g56430     | putative protein; protein id: At3g56430.1                 | 0.731     | 0.704     | 0.426     | 0.649  |
| A010280_01 | At3g54540     | ABC transporter family protein; protein id: At3g5454      | -0.196 NA | NA        |           | -0.737 |
| A010408_01 | At3g11540     | spindly (gibberellin signal transduction protein); prot   | -0.104 NA | NA        |           | -0.436 |
| A010432_01 | At3g05070     | expressed protein; protein id: At3g05070.1                | 0.236     | 0.367     | 0.465     | -0.161 |
| A010479_01 | At3g01810     | hypothetical protein; protein id: At3g01810.1             | 0.87      | 0.462     | 0.224     | 0.205  |
| A010550_01 | At3g58460     | putative protein; protein id: At3g58460.1                 | 0.178 NA  |           | -0.097    | -0.1   |
| A010630_01 | At3g12060     | hypothetical protein; protein id: At3g12060.1             | 0.679     | 0.545 NA  |           | 0.344  |
| A010702_01 | At3g16050     | putative ethylene-inducible protein; protein id: At3g1    | 1.157     | 1.209     | 0.865     | 1.321  |
| A010770_01 | At3g10420     | expressed protein; protein id: At3g10420.1                | -1.103 NA |           | -0.984    | -0.575 |
| A010800_01 | At3g20320     | expressed protein; protein id: At3g20320.1                | 0.21      | 0.202     | 0.032     | 0.646  |
| A010889_01 | At3g46980     | putative protein; protein id: At3g46980.1                 | 0.065 NA  |           | -0.146    | -0.219 |
| A010924_01 | At3g06730     | thioredoxin, putative; protein id: At3g06730.1            | 0.506 NA  |           | 0.541     | 0.406  |
| A010967_01 | At3g62960     | glutaredoxin -like protein; protein id: At3g62960.1       | -3.263 NA | NA        |           | NA     |
| A010984_01 | At3g44020     | thylakoid lumenal P17.1 protein; protein id: At3g440      | -0.708 NA |           | -0.062    | -0.447 |
| A010986_01 | At3g58680     | transcriptional coactivator - like protein; protein id: A | -0.491    | -0.511    | -0.189    | 0.077  |
| A011239_01 | At3g43520     | expressed protein; protein id: At3g43520.1                | 0.503     | 0.408     | 0.425     | 0.318  |
| A011702_01 | At3g21240     | putative 4-coumarate:CoA ligase 2; protein id: At3g;      | -1.674 NA | NA        |           | NA     |
| A011934_01 | At3g62450     | putative protein; protein id: At3g62450.1                 | 0.156 NA  |           | 0.245     | -0.33  |
| A011958_01 | At3g06170     | hypothetical protein; protein id: At3g06170.1             | -0.92 NA  |           | -0.527    | -0.589 |
| A012029_01 | At3g02570     | putative mannose-6-phosphate isomerase; protein i         | 0.767     | 0.506     | 0.378     | 0.538  |
| A012053_01 | At3g14940     | phosphoenolpyruvate carboxylase (PPC); protein id         | -0.204    | -0.19 NA  |           | 0.207  |
| A012261_01 | At3g45040     | putative protein; protein id: At3g45040.1                 | -0.548 NA | NA        |           | -0.308 |
| A012345_01 | At3g12350     | F-box protein family; protein id: At3g12350.1             | -0.386 NA | NA        |           | -0.104 |
| A012409_01 | At3g59380     | farnesyltransferase alpha subunit (FTA)(protein farn      | -0.496 NA | NA        |           | -0.071 |
| A012427_01 | At3g29670     | anthocyanin 5-aromatic acyltransferase, putative; pi      | 0.23      | 0.395     | 0.03      | -0.166 |
| A012433_01 | At3g48300     | similar to cytochrome P450-like protein; protein id: /    | -0.431 NA | NA        |           | 0.092  |
| A012676_01 | At3g43720     | lipid-transfer protein-like protein; protein id: At3g437  | 0.583     | 0.497     | 0.483     | 0.543  |
| A012743_01 | At3g63080     | glutathione peroxidase, putative; protein id: At3g630     | -0.633 NA | NA        |           | NA     |
| A013121_01 | At4g33080     | putative protein kinase; protein id: At4g33080.1          | -0.359 NA | NA        |           | -0.4   |
| A013400_01 | not annotated | Chr4 W/8220487-8220552                                    | -0.378 NA |           | -0.29     | -1.04  |
| A013826_01 | At4g32440     | putative protein; protein id: At4g32440.1                 | -0.886    | -0.802    | -0.511    | -0.603 |
| A014261_01 | At4g36810     | geranylgeranyl pyrophosphate synthase (GGPS1)(fi          | -0.228 NA |           | 0.07      | -0.29  |
| A014327_01 | At4g25390     | receptor kinase-like protein; protein id: At4g25390.1     | -1.437 NA | NA        |           | -2.461 |
| A014482_01 | At4g02030     | hypothetical protein; protein id: At4g02030.1             | 0.253 NA  | NA        |           | 0.227  |
| A015221_01 | At4g23620     | putative protein; protein id: At4g23620.1                 | 0.513 NA  |           | 0.638     | 0.613  |
| A015419_01 | At4g01900     | P II nitrogen sensing protein GLB I; protein id: At4g     | 1.303     | 1.134     | 1.092     | 1.27   |
| A015597_01 | At5g22750     | putative protein; protein id: At5g22750.1                 | 0.827     | 1.06      | 0.859     | 0.641  |
| A015680_01 | At5g16510     | amylogenin; reversibly glycosylatable polypeptide; p      | 0.7       | 0.726     | 0.639     | 0.434  |
| A015726_01 | At5g65450     | putative protein; protein id: At5g65450.1                 | -0.035    | 0.227 NA  |           | -0.047 |
| A015821_01 | At5g13890     | putative protein; protein id: At5g13890.1                 | -0.212 NA | NA        |           | -0.389 |
| A015829_01 | At5g06240     | unknown protein; protein id: At5g06240.1                  | 0.18      | 0.304     | 0.384     | 0.22   |
| A016078_01 | At5g54180     | putative protein; protein id: At5g54180.1                 | 0.551     | 0.56      | 0.161     | 0.282  |

|            |           |                                                         |           |           |           |        |
|------------|-----------|---------------------------------------------------------|-----------|-----------|-----------|--------|
| A016171_01 | At5g62150 | putative protein; protein id: At5g62150.1               | -1.957 NA | NA        | NA        |        |
| A016256_01 | At5g47240 | mutT domain protein-like; protein id: At5g47240.1       | 0.757     | 0.953     | 0.32      | 0.137  |
| A016280_01 | At5g39990 | N-acetylglucosaminyltransferase family (Core-2/I-Br     | 0.499     | 0.134 NA  |           | 0.543  |
| A016737_01 | At5g11630 | putative protein; protein id: At5g11630.1               | 0.339     | 0.819     | 0.695     | 0.803  |
| A016743_01 | At5g57440 | GS1-like protein; protein id: At5g57440.1               | 1.228     | 1.021     | 0.502     | 0.884  |
| A016766_01 | At5g14510 | putative protein; protein id: At5g14510.1               | -0.666    | -1.138 NA |           | NA     |
| A016874_01 | At5g11790 | putative protein; protein id: At5g11790.1               | 0.178 NA  |           | -0.103    | 0.003  |
| A016906_01 | At5g40420 | oleosin; protein id: At5g40420.1                        | -0.911 NA |           | -1.5      | -2.404 |
| A016921_01 | At5g03560 | putative protein; protein id: At5g03560.1               | -1.133 NA |           | -0.879    | -1.148 |
| A016963_01 | At5g05140 | putative protein; protein id: At5g05140.1               | -0.657 NA | NA        |           | -0.931 |
| A017319_01 | At5g35970 | DNA helicase-like; protein id: At5g35970.1              | -1.533    | -1.608    | -1.413    | -2.767 |
| A017543_01 | At5g11580 | putative protein; protein id: At5g11580.1               | -0.016 NA | NA        |           | -0.412 |
| A017592_01 | At5g16140 | CRS2-like protein; protein id: At5g16140.1              | 0.597     | 0.361     | 0.001     | 0.011  |
| A017615_01 | At5g35735 | expressed protein; protein id: At5g35735.1              | 0.09 NA   | NA        |           | -1.236 |
| A017639_01 | At5g57850 | branched-chain amino acid aminotransferase-like pi      | 0.967     | 1.077     | 0.346     | 0.263  |
| A017675_01 | At5g42060 | putative protein; protein id: At5g42060.1               | 0.51      | 0.814     | 0.979     | 0.934  |
| A017696_01 | At5g58787 | expressed protein; protein id: At5g58787.1              | -0.818 NA | NA        |           | -1.615 |
| A017708_01 | At5g50830 | unknown protein; protein id: At5g50830.1                | -0.388 NA | NA        |           | NA     |
| A018180_01 | At5g02050 | putative protein; protein id: At5g02050.1               | 1.508     | 1.468     | 1.291     | 1.48   |
| A018346_01 | At5g55810 | putative protein; protein id: At5g55810.1               | -0.213 NA |           | 0.001     | -0.071 |
| A018376_01 | At5g61500 | AtAPG3; autophagocytosis protein - like; protein id:    | -0.548 NA |           | -0.269    | -0.205 |
| A018459_01 | At5g56240 | unknown protein; protein id: At5g56240.1                | -0.778 NA | NA        |           | -0.262 |
| A018525_01 | At5g06430 | putative protein; protein id: At5g06430.                | 0.04      | 0.041 NA  |           | 0.348  |
| A018642_01 | At5g57870 | putative eukaryotic initiation factor eIF4              | 0.623     | 0.64      | 0.362     | -0.002 |
| A018791_01 | At5g60420 | putative protein; protein id: At5g60420.1               | 0.563     | 0.414     | 0.19      | -0.066 |
| A018839_01 | At5g65290 | unknown protein; protein id: At5g65290.1                | -0.219    | -0.291 NA |           | -0.171 |
| A019083_01 | At5g46420 | putative protein; protein id: At5g46420.1               | 0.29      | 0.222     | -0.172    | 0.186  |
| A019129_01 | At5g08710 | similar to UVB-resistance protein UVR8 (gb AAD43:       | 0.402     | 0.234     | 0.316     | -0.075 |
| A019148_01 | At5g15860 | carboxylesterase-like protein; protein id: At5g15860    | -1.281 NA |           | -1.086    | -1.37  |
| A019207_01 | At5g05710 | AtPH1-like protein; protein id: At5g05710.1             | -0.881 NA | NA        |           | NA     |
| A019260_01 | At5g12890 | glucosyltransferase-like protein; protein id: At5g128   | -0.4      | -0.339 NA |           | -0.386 |
| A019316_01 | At5g11730 | putative protein; protein id: At5g11730.1               | -0.219 NA | NA        |           | -0.111 |
| A019339_01 | At5g63050 | unknown protein; protein id: At5g63050.1                | 0.405     | 0.458 NA  |           | 0.47   |
| A019441_01 | At3g29160 | Snf1-related protein kinase KIN11 (AKIN11); protei      | -0.265    | -0.318    | -0.226    | 0.324  |
| A019481_01 | At3g51140 | putative protein; protein id: At3g51140.1               | 0.436 NA  |           | 0.217     | 0.261  |
| A019507_01 | At4g28530 | NAM / CUC2 -like protein; protein id: At4g28530.1       | -1.773 NA | NA        |           | NA     |
| A019546_01 | At4g24960 | abscisic acid-induced - like protein; protein id: At4g: | 0.321     | 0.337     | 0.606     | 0.421  |
| A019605_01 | At3g60620 | phosphatidate cytidyltransferase - like protein; pro    | 0.118     | 0.395     | 0.172     | 0.61   |
| A019623_01 | At4g36990 | heat shock transcription factor HSF4; protein id: At4   | -0.48     | -0.551    | -0.356    | -0.714 |
| A019735_01 | At5g62070 | putative protein; protein id: At5g62070.1               | 0.794     | 0.762     | 0.505     | 0.474  |
| A019790_01 | At1g16400 | cytochrome p450 family; protein id: At1g16400.1         | -2.944 NA | NA        |           | NA     |
| A019856_01 | At2g47880 | putative glutaredoxin; protein id: At2g47880.1          | -3.384 NA | NA        |           | NA     |
| A019860_01 | At2g27820 | putative chorismate mutase/prephenate dehydratas        | 0.516     | 0.722     | 0.598     | 0.241  |
| A019961_01 | At1g78200 | protein phosphatase 2C (PP2C); protein id: At1g78:      | -0.764    | -1.179    | -0.544    | -0.593 |
| A020003_01 | At3g10730 | expressed protein; protein id: At3g10730.1              | 0.32      | 0.211 NA  |           | -0.195 |
| A020052_01 | At4g16985 | expressed protein; protein id: At4g16985.1              | 0.469     | 0.891     | 0.538     | 0.341  |
| A020094_01 | At5g19440 | cinnamyl-alcohol dehydrogenase - like protein; prote    | -0.236 NA | NA        |           | -0.014 |
| A020163_01 | At3g03210 | unknown protein; protein id: At3g03210.1                | -0.636 NA | NA        |           | NA     |
| A020252_01 | At4g29950 | putative protein; protein id: At4g29950.1               | -0.759 NA | NA        |           | -0.516 |
| A020391_01 | At4g32570 | putative protein; protein id: At4g32570.1               | 0.775     | 0.952     | 0.794     | 1.076  |
| A020483_01 | xxxx      | b/t putative protein; protein id: At5g14260.1 and kin:  | -0.096 NA | NA        |           | NA     |
| A020662_01 | At3g13360 | expressed protein; protein id: At3g13360.1              | -0.123 NA | NA        |           | -0.806 |
| A020698_01 | At1g73500 | MAP kinase, putative; protein id: At1g73500.1           | -1.312    | -1.124    | -0.674    | -1.012 |
| A020745_01 | At5g41990 | MAP kinase; protein id: At5g41990.1                     | -0.254    | -0.574 NA |           | -0.123 |
| A020865_01 | At4g18780 | cellulose synthase - like protein; protein id: At4g187  | -1.471 NA |           | -1.105 NA |        |
| A020875_01 | At1g19240 | expressed protein; protein id: At1g19240.1              | 0.073     | 0.485 NA  |           | NA     |
| A020877_01 | At5g03170 | fasciclin-like arabinogalactan-protein (FLA11); prote   | -1.6      | -1.667    | -0.838    | -1.911 |
| A020895_01 | At5g05470 | eukaryotic translation initiation factor 2 alpha subun  | 0.273     | 0.464 NA  |           | NA     |
| A020989_01 | At5g66040 | senescence-associated protein; protein id: At5g660      | -0.777 NA | NA        |           | -0.644 |
| A021075_01 | At5g56020 | putative protein; protein id: At5g56020.1               | -0.046 NA | NA        |           | -0.82  |
| A021101_01 | At2g03350 | expressed protein; protein id: At2g03350.1              | 0.46      | 0.411     | 0.314     | -0.224 |
| A021199_01 | At3g24420 | unknown protein; protein id: At3g24420.1                | -0.682    | -1.028    | -1.445    | -2.149 |
| A021203_01 | At3g23400 | expressed protein; protein id: At3g23400.1              | -0.296    | -0.351 NA |           | -0.513 |
| A021404_01 | At3g30415 | pseudogene, putative uroporphyrin III methylase; p      | 0.018 NA  |           | -0.159    | -0.238 |
| A021457_01 | At3g19740 | ATPase, putative; protein id: At3g19740.1               | 0.099     | -0.064 NA |           | 0.187  |
| A021598_01 | At2g35240 | unknown protein; protein id: At2g35240.1                | 0.296 NA  |           | 0.518     | 0.147  |
| A021618_01 | At2g02130 | plant defensin protein, putative (PDF2.3); protein id:  | 1.059     | 0.993     | 0.343     | 0.085  |
| A021825_01 | At5g66230 | putative protein; protein id: At5g66230.1               | 1.475     | 1.596     | 1.395     | 1.93   |

|            |           |                                                          |           |           |           |        |
|------------|-----------|----------------------------------------------------------|-----------|-----------|-----------|--------|
| A021855_01 | At5g17060 | ADP-ribosylation factor-like protein; protein id: At5g   | -0.324    | -0.618    | -0.101    | -0.239 |
| A022122_01 | At5g46240 | potassium channel protein KAT1 (pir S32816); prot        | -1.399 NA | NA        | NA        |        |
| A022228_01 | At3g50340 | putative protein; protein id: At3g50340.1                | -0.011 NA |           | -0.024    | -0.408 |
| A022508_01 | At4g24330 | unknown protein; protein id: At4g24330                   | 0.478     | 0.353     | 0.307     | 0.545  |
| A022526_01 | At3g46740 | chloroplast import-associated channel protein homc       | 0.933     | 0.832     | 0.298     | 0.526  |
| A022621_01 | At4g17160 | GTP-binding protein, putative; protein id: At4g17160     | 0.272 NA  |           | -0.111    | -0.164 |
| A022710_01 | At3g29595 | pseudogene, hypothetical protein; protein id: At3g29     | -0.194    | -0.547    | -0.464    | -0.996 |
| A022924_01 | At5g39850 | 40S ribosomal protein S9-like; protein id: At5g39850     | -0.402 NA |           | 0.568     | 0.483  |
| A023591_01 | At2g16430 | putative purple acid phosphatase precursor; protein      | -0.118 NA | NA        | NA        |        |
| A023758_01 | At1g20510 | expressed protein; protein id: At1g20510.1               | -0.365    | -0.061    | -0.304    | 0.251  |
| A023785_01 | At1g06200 | hypothetical protein; protein id: At1g06200.1            | -0.017    | -0.042    | -0.287    | -0.764 |
| A023963_01 | At3g11270 | 26S proteasome regulatory subunit S12 (RPN8), pu         | 0.479 NA  | NA        |           | 0.882  |
| A024087_01 | At3g06940 | putative mudrA protein; protein id: At3g06940.1          | -0.165    | -0.315 NA |           | 0.124  |
| A024254_01 | At2g41770 | expressed protein; protein id: At2g41770.1               | 0.405     | 0.18 NA   |           | 0.436  |
| A024432_01 | At1g13650 | unknown protein; protein id: At1g13650.1                 | -0.855 NA |           | -2.261    | -3.89  |
| A024688_01 | At2g45660 | MADS-box protein (AGL20); protein id: At2g45660.1        | -0.982 NA | NA        | NA        |        |
| A024828_01 | At3g51450 | strictosidine synthase-related; protein id: At3g51450    | 0.366 NA  | NA        |           | 0.112  |
| A024871_01 | At5g65770 | nuclear matrix constituent protein 1 (NMCP1)-like; p     | -0.306    | -0.949 NA |           | -0.741 |
| A025304_01 | At1g04430 | ankyrin-like protein; protein id: At1g04430.1            | 0.813 NA  | NA        |           | -0.05  |
| A025505_01 | At1g64940 | cytochrome p450, putative; protein id: At1g64940.1       | -0.053 NA | NA        |           | -0.65  |
| A025631_01 | At1g12640 | unknown protein; protein id: At1g12640.1                 | -1.317 NA |           | -0.752    | -0.875 |
| A025649_01 | At3g12560 | myb-family transcription factor, putative; protein id: . | 0.343     | -0.186 NA |           | 0.189  |
| A025888_01 | At2g04170 | unknown protein; protein id: At2g04170.1                 | 0.259     | 0.196 NA  |           | 0.34   |
| A025917_01 | At5g66680 | dolichyl-di-phosphooligosaccharide-protein glycotra      | -0.034    | 0.017     | 0.066     | -0.138 |
| A025993_01 | At5g55990 | calcineurin B-like protein 2 (gb AAC26009.1)             | -0.047    | -0.565    | -0.674    | -0.838 |
| A000832_01 | At1g80020 | hypothetical protein; protein id: At1g80020.1            | NA        | NA        | NA        | NA     |
| A000983_01 | At1g28470 | NAM protein, putative; protein id: At1g28470.1           | NA        | NA        | NA        | NA     |
| A001323_01 | At1g53620 | hypothetical protein; protein id: At1g53620.1            | NA        | 0.084 NA  | NA        | NA     |
| A001615_01 | At1g24100 | UDP-glycosyltransferase family; protein id: At1g241      | NA        | NA        | -0.693    | -1.448 |
| A002100_01 | At1g73330 | Dr4(protease inhibitor); protein id: At1g73330.1         | NA        | NA        | NA        | NA     |
| A002428_01 | At1g34060 | expressed protein; protein id: At1g34060.1               | NA        | NA        | NA        | NA     |
| A002959_01 | At1g72940 | disease resistance protein (TIR-NBS class), putativ      | NA        | NA        | NA        | NA     |
| A003384_01 | At1g71140 | hypothetical protein; protein id: At1g71140.1            | NA        | NA        | NA        | NA     |
| A003432_01 | At1g72220 | RING-H2 zinc finger protein ATL3, putative; protein      | NA        | NA        | NA        | NA     |
| A003906_01 | At1g03850 | expressed protein; protein id: At1g03850.1               | NA        | NA        | NA        | NA     |
| A004158_01 | At1g10700 | phosphoribosyl diphosphate synthase; protein id: At      | NA        | NA        | NA        | -0.2   |
| A005016_01 | At4g02075 | expressed protein; protein id: At4g02075.1               | NA        | NA        | NA        | NA     |
| A006218_01 | At2g15020 | hypothetical protein; protein id: At2g15020.1            | NA        | NA        | NA        | NA     |
| A006571_01 | At2g15320 | leucine rich repeat protein family; protein id: At2g15   | NA        | NA        | NA        | -0.221 |
| A007664_01 | At2g41610 | hypothetical protein; protein id: At2g41610.1            | NA        | NA        | NA        | NA     |
| A007996_01 | At2g24570 | WRKY family transcription factor; protein id: At2g24     | NA        | NA        | -0.065    | -0.166 |
| A008395_01 | At2g25680 | hypothetical protein; protein id: At2g25680.1            | NA        | NA        | -0.459    | -1.125 |
| A009384_01 | At3g16920 | glycosyl hydrolase family 19 (chitinase); protein id: /  | NA        | NA        | -2.291    | -3.515 |
| A010777_01 | At3g07080 | putative integral membrane protein; protein id: At3g     | NA        | NA        | NA        | 0.17   |
| A011549_01 | At3g04210 | disease resistance protein (TIR-NBS class), putativ      | NA        | NA        | NA        | NA     |
| A012282_01 | At3g11580 | putative DNA binding protein; protein id: At3g11580      | NA        | NA        | -0.481    | -0.782 |
| A012617_01 | At3g59520 | putative protein; protein id: At3g59520.1                | NA        | NA        | NA        | NA     |
| A014149_01 | At4g19170 | 9-cis-epoxycarotenoid dioxygenase (neoxanthin cle        | NA        | NA        | -2.822 NA | NA     |
| A014237_01 | At4g09840 | hypothetical protein; protein id: At4g09840.1            | NA        | 0.386 NA  | NA        | NA     |
| A014458_01 | At4g29140 | putative protein; protein id: At4g29140.1                | NA        | NA        | NA        | -0.784 |
| A014719_01 | At4g16000 | A.t. DNA chromosome 4, contig fragment No. 70            | NA        | NA        | NA        | NA     |
| A014768_01 | At4g22480 | putative glycine-rich protein; protein id: At4g22480.1   | NA        | 0.082 NA  | NA        | -0.596 |
| A015277_01 | At4g18880 | heat shock transcription factor - like protein; protein  | NA        | NA        | NA        | NA     |
| A015501_01 | At5g12870 | myb family transcription factor; protein id: At5g1287    | NA        | NA        | NA        | NA     |
| A015891_01 | At5g45380 | urea active transporter-like protein; protein id: At5g4  | NA        | NA        | NA        | NA     |
| A016892_01 | At5g66490 | putative protein; protein id: At5g66490.1                | NA        | NA        | NA        | NA     |
| A018578_01 | At5g40720 | putative protein; protein id: At5g40720.1                | NA        | NA        | NA        | NA     |
| A018773_01 | At5g42150 | expressed protein; protein id: At5g42150.1               | NA        | 0.279     | 0.684     | 0.94   |
| A019147_01 | At5g07840 | putative protein; protein id: At5g07840.1                | NA        | NA        | NA        | -0.585 |
| A019173_01 | At5g10690 | expressed protein; protein id: At5g10690.1               | NA        | 0.475     | 0.249     | 0.275  |
| A020365_01 | At3g04550 | expressed protein; protein id: At3g04550.1               | NA        | NA        | -0.613    | -0.38  |
| A020695_01 | At4g27280 | putative protein; protein id: At4g27280.1                | NA        | NA        | -0.242    | -1.88  |
| A020773_01 | At4g23470 | expressed protein; protein id: At4g23470.1               | NA        | 0.223     | 0.034     | -1.362 |
| A021007_01 | At3g01420 | feebly-like protein; protein id: At3g01420.1             | NA        | NA        | NA        | NA     |
| A021284_01 | At4g13500 | putative protein; protein id: At4g13500.1                | NA        | NA        | 0.221     | -0.896 |
| A021358_01 | At3g22460 | O-acetylserine(thiol) lyase, putative; protein id: At3g  | NA        | NA        | NA        | -0.768 |
| A021505_01 | At5g47330 | palmitoyl-protein thioesterase precursor-like; proteir   | NA        | NA        | NA        | NA     |
| A021801_01 | At4g27170 | NWMU4 - 2S albumin 4 precursor; protein id: At4g2        | NA        | NA        | -1.81     | -3.654 |

|            |           |                                                        |    |    |           |        |        |
|------------|-----------|--------------------------------------------------------|----|----|-----------|--------|--------|
| A021844_01 | At5g12890 | A.t. chromosome II section 237 of 255 of the compl     | NA | NA | NA        | NA     |        |
| A021861_01 | At1g28240 | unknown protein; protein id: At1g28240.1               | NA | NA | NA        |        | -0.625 |
| A021957_01 | At4g30290 | xyloglucan endo-1,4-beta-D-glucanase-like protein      | NA | NA | NA        |        | -2.368 |
| A022288_01 | At4g28500 | similar to NAM protein, putative; protein id: At4g285  | NA | NA | NA        | NA     |        |
| A022312_01 | At4g17900 | putative protein; protein id: At4g17900.1              | NA | NA |           | -1.442 | -2.462 |
| A023427_01 | At2g32490 | hypothetical protein; protein id: At2g32490.1          | NA | NA | NA        |        |        |
| A023639_01 | At2g20500 | hypothetical protein; protein id: At2g20500.1          | NA | NA | NA        |        |        |
| A024654_01 | xxxx      | Not found                                              | NA |    | -0.011 NA |        | -0.381 |
| A025744_01 | At1g72660 | putative GTP-binding protein; protein id: At1g72660    | NA |    | 0.151 NA  |        | -0.491 |
| A008108_01 | At2g43060 | unknown protein; protein id: At2g43060.1               | NA | NA | NA        | NA     |        |
| A011990_01 | At3g46460 | E2, ubiquitin-conjugating enzyme 13 (UBC13); prot      | NA | NA |           | -0.067 | -0.454 |
| A018550_01 | At5g17470 | calmodulin-like protein; protein id: At5g17470.1       | NA | NA | NA        |        |        |
| A018865_01 | At5g58680 | putative protein; protein id: At5g58680.1              | NA |    | -0.492    | -0.356 | -0.496 |
| A020743_01 | At1g25097 | F5A9.6; protein id: At1g25097.1                        | NA | NA | NA        | NA     |        |
| A023790_01 | At1g32290 | hypothetical protein; protein id: At1g32290.1          | NA |    | 0.449 NA  |        | 0.513  |
| A023812_01 | xxxx      | F10A5.30; pseudogene, gamma-glutamyl hydrolase         | NA | NA | NA        | NA     |        |
| A024387_01 | At4g26000 | KH domain protein; protein id: At4g26000.1             | NA |    | -0.559    | -0.699 | -1.09  |
| A024446_01 | At4g04610 | 5-adenylylsulfate reductase; protein id: At4g04610.1   | NA |    | -1.64     | -0.793 | -1.38  |
| A024462_01 | At1g08360 | 60S ribosomal protein L10A, putative; protein id: At   | NA |    | -0.121 NA | NA     |        |
| A024556_01 | At5g53900 | putative protein; protein id: At5g53900.1              | NA | NA | NA        |        | 0.16   |
| A025800_01 | At1g79650 | DNA repair protein RAD23, putative; protein id: At1g   | NA | NA |           | 0.059  | -0.35  |
| A000741_01 | At1g66130 | oxidoreductase, putative; protein id: At1g66130.1      | NA |    | -0.057    | -0.023 | -0.284 |
| A020770_01 | At4g28520 | compared to genome                                     | NA | NA |           | -1.762 | -4.372 |
| A001491_01 | At1g67870 | expressed protein; protein id: At1g67870.1             | NA | NA |           | -1.274 | -2.112 |
| A000015_01 | At1g17560 | ribosomal protein, putative; protein id: At1g17560.1   | NA |    | 1.43      | 1.222  | 1.826  |
| A000400_01 | At1g32400 | expressed protein; protein id: At1g32400.1             | NA |    | -0.294    | -0.314 | -0.322 |
| A000418_01 | At1g21190 | hypothetical protein; protein id: At1g21190.1          | NA |    | 0.222     | 0.305  | 0.06   |
| A000448_01 | At1g26850 | expressed protein; protein id: At1g26850.1             | NA |    | 0.617     | 0.039  | 0.456  |
| A000745_01 | At1g51690 | 55 kDa B regulatory subunit of phosphatase 2A; prc     | NA |    | -0.259    | -0.061 | -0.231 |
| A000942_01 | At1g16840 | expressed protein; protein id: At1g16840.1             | NA |    | -0.199    | -0.162 | -0.501 |
| A001047_01 | At1g05870 | unknown protein; protein id: At1g05870.1               | NA |    | 0.587     | 0.605  | 0.929  |
| A001349_01 | At1g32060 | phosphoribulokinase precursor; protein id: At1g3206    | NA |    | -0.301    | -0.537 | -0.413 |
| A001364_01 | At1g48850 | chorismate synthase, putative; protein id: At1g4885    | NA |    | 0.292     | 0.246  | 0.493  |
| A001393_01 | At1g10760 | expressed protein; protein id: At1g10760.1             | NA |    | 0.211     | -0.44  | 0.103  |
| A001427_01 | At1g34470 | expressed protein; protein id: At1g34470.1             | NA |    | -0.239    | -0.461 | -0.089 |
| A001475_01 | At1g11930 | putative proline synthetase associated protein; prot   | NA |    | -0.122    | -0.025 | -0.19  |
| A001493_01 | At1g35620 | protein disulfide isomerase, putative; protein id: At1 | NA |    | 0.39      | 0.128  | 0.345  |
| A001569_01 | At1g12650 | hypothetical protein; protein id: At1g12650.1          | NA |    | 0.003     | -0.138 | 0.175  |
| A002091_01 | At1g80490 | unknown protein; protein id: At1g80490.1               | NA |    | 0.69 NA   | NA     |        |
| A002115_01 | At1g36310 | expressed protein; protein id: At1g36310.1             | NA |    | 0.315     | 0.349  | 0.84   |
| A002139_01 | At1g09770 | putative DNA-binding protein, Myb; protein id: At1g    | NA |    | -0.141    | -0.277 | -0.189 |
| A002163_01 | At1g13980 | putative pattern formation protein EMB30; protein id   | NA |    | 0.242 NA  |        | 0.145  |
| A002347_01 | At1g03700 | expressed protein; protein id: At1g03700.1             | NA |    | 0.331 NA  |        | -0.898 |
| A002358_01 | At1g22310 | unknown protein; protein id: At1g22310.1               | NA |    | -0.297    | -0.45  | 0.348  |
| A002438_01 | At1g75410 | BEL1-like homeodomain 3 protein (BLH3); protein id     | NA |    | -1.909    | -1.342 | -1.222 |
| A002620_01 | At1g12280 | disease resistance protein (CC-NBS-LRR class), pu      | NA |    | -1.113    | -0.847 | -0.018 |
| A003454_01 | At1g71430 | expressed protein; protein id: At1g71430.1             | NA |    | 0.435     | 0.627  | 0.579  |
| A004153_01 | At1g33200 | T16O9.15; pseudogene, hypothetical protein             | NA |    | -0.358    | -0.405 | -0.573 |
| A004340_01 | At1g63710 | cytochrome P450, putative; protein id: At1g63710.1     | NA |    | -0.019    | 0.08   | 0.138  |
| A004366_01 | At1g69690 | expressed protein; protein id: At1g69690.1             | NA |    | 0.194     | 0.331  | 0.053  |
| A004544_01 | At1g78420 | expressed protein; protein id: At1g78420.1             | NA |    | -0.725    | -0.444 | -0.495 |
| A004681_01 | At1g50430 | sterol delta7 reductase; protein id: At1g50430.1       | NA |    | 0.246     | 0.069  | 0.071  |
| A004767_01 | At1g30490 | HD-Zip transcription factor, Athb-9; protein id: At1g  | NA |    | -0.472 NA |        | 0.016  |
| A004957_01 | At5g27280 | putative protein; protein id: At5g27280.1              | NA |    | -1.003    | -0.797 | -1.369 |
| A004958_01 | At5g27520 | mitochondrial carrier protein family; protein id: At5g | NA |    | -0.364    | -0.449 | 0.046  |
| A004969_01 | At1g22950 | unknown protein; protein id: At1g22950.1               | NA |    | 0.363     | 0.261  | 0.489  |
| A005896_01 | At5g14950 | glycosyl hydrolase family 38 (alpha-mannosidase); j    | NA |    | 0.02      | -0.191 | 0.163  |
| A005927_01 | At1g03900 | expressed protein; protein id: At1g03900.1             | NA |    | -0.261    | -0.393 | -0.566 |
| A005993_01 | At5g05450 | DEAD/DEAH box RNA helicase protein, putative; pr       | NA |    | 0.274     | 0.006  | 0.583  |
| A006010_01 | At2g37130 | peroxidase, putative (ATP2a); protein id: At2g3713     | NA |    | -3.629    | -2.871 | -2.981 |
| A006113_01 | At2g26140 | FtsH protease, putative; protein id: At2g26140.1       | NA |    | -0.168    | -0.28  | -0.055 |
| A006404_01 | At2g38660 | methylenetetrahydrofolate dehydrogenase; protein i     | NA |    | 0.173     | -0.097 | 0.296  |
| A006526_01 | At2g43120 | similar to pirin-like protein; protein id: At2g43120.1 | NA |    | -1.323    | -0.849 | -0.197 |
| A006614_01 | At2g37760 | aldo/keto reductase family; protein id: At2g37760.1    | NA |    | -0.974    | -0.451 | -0.501 |
| A006812_01 | At2g30870 | glutathione transferase, putative; protein id: At2g30  | NA |    | 0.499     | -0.089 | -0.082 |
| A006983_01 | At2g47720 | hypothetical protein; protein id: At2g47720.1          | NA |    | -1.113    | -1.034 | -0.914 |
| A007065_01 | At2g38910 | putative calcium-dependent protein kinase; protein i   | NA |    | -0.622    | -0.487 | -1.115 |
| A007160_01 | At2g35770 | putative serine carboxypeptidase II; protein id: At2g  | NA |    | -0.439    | -0.357 | -0.981 |

|            |           |                                                        |    |        |        |        |
|------------|-----------|--------------------------------------------------------|----|--------|--------|--------|
| A007253_01 | At2g20610 | putative tyrosine aminotransferase; protein id: At2g2  | NA | -1.556 | -0.591 | -0.652 |
| A007301_01 | At2g26670 | heme oxygenase 1 (HO1); protein id: At2g26670.1        | NA | -1.68  | -0.654 | -1.566 |
| A007345_01 | At2g25670 | expressed protein; protein id: At2g25670.1             | NA | -0.007 | 0.23   | -0.024 |
| A007579_01 | At2g28550 | AP2 domain protein RAP2.7; protein id: At2g28550       | NA | -0.486 | -0.681 | -1.152 |
| A007731_01 | At2g21410 | putative vacuolar proton-ATPase subunit; protein id    | NA | 0.265  | -0.003 | 0.025  |
| A007737_01 | At2g30260 | small nuclear ribonucleoprotein U2B, putative; prote   | NA | 0.327  | 0.341  | 0.139  |
| A008444_01 | At2g32070 | putative CCR4-associated factor; protein id: At2g32    | NA | -0.042 | 0.305  | 0.816  |
| A008462_01 | At2g01970 | endomembrane protein 70, putative; protein id: At2     | NA | 0.251  | -0.026 | 0.203  |
| A009204_01 | At3g55110 | ABC transporter family protein; protein id: At3g5511   | NA | 0.689  | 0.739  | 1.261  |
| A009242_01 | At3g61070 | putative protein; protein id: At3g61070.1              | NA | -0.488 | -0.193 | -0.25  |
| A009243_01 | At3g11560 | unknown protein; protein id: At3g11560.1               | NA | -0.394 | -0.302 | 0.123  |
| A009644_01 | At3g17750 | protein kinase, putative; protein id: At3g17750.1      | NA | -0.054 | NA     | NA     |
| A009651_01 | At3g13070 | hemolysin-like protein; protein id: At3g13070.1        | NA | 0.213  | -0.102 | 0.658  |
| A009685_01 | At3g07720 | expressed protein; protein id: At3g07720.1             | NA | -0.318 | 0.032  | -0.128 |
| A009717_01 | At3g19150 | Kip-related protein 6; protein id: At3g19150.1         | NA | -1.348 | -0.566 | -1.466 |
| A009718_01 | At3g24830 | 60S ribosomal protein, putative; protein id: At3g248   | NA | 0.794  | 0.763  | 1.027  |
| A009724_01 | At3g46890 | putative protein; protein id: At3g46890.1              | NA | -0.966 | NA     | NA     |
| A010662_01 | At3g20705 | pseudogene                                             | NA | 0.046  | NA     | 0.245  |
| A011147_01 | At3g16290 | FtsH protease, putative; protein id: At3g16290.1       | NA | 0.828  | 0.383  | 0.705  |
| A011464_01 | At3g10130 | unknown protein; protein id: At3g10130.1               | NA | -1.005 | -0.944 | -1.346 |
| A011466_01 | At3g10030 | putative uridylate kinase; protein id: At3g10030.1     | NA | -0.172 | -0.359 | -0.245 |
| A011639_01 | At3g13300 | hypothetical protein; protein id: At3g13300.1          | NA | -0.095 | 0.055  | -0.156 |
| A011648_01 | At3g54660 | glutathione reductase, chloroplast precursor; proteir  | NA | -0.076 | -0.102 | -0.003 |
| A011649_01 | At3g10770 | expressed protein; protein id: At3g10770.1             | NA | -0.859 | -0.537 | -0.333 |
| A011737_01 | At3g57530 | calcium-dependent protein kinase; protein id: At3g5    | NA | -1.188 | -0.987 | -1.019 |
| A011739_01 | At3g52300 | putative protein; protein id: At3g52300.1              | NA | 0.235  | 0.327  | 0.52   |
| A011796_01 | At3g52730 | ubiquinol--cytochrome-c reductase-like protein; prot   | NA | 0.32   | 0.45   | 0.125  |
| A011824_01 | At3g50670 | U1 small nuclear ribonucleoprotein 70 (U1-70k); prc    | NA | 0.339  | 0.262  | -0.024 |
| A012405_01 | At3g11020 | DRE binding protein (DREB2B); protein id: At3g110      | NA | -0.853 | -0.795 | -1.501 |
| A012825_01 | At3g29240 | chloroplast lumen common protein family; protein id    | NA | -1.328 | -1.087 | -1.528 |
| A012892_01 | At4g00530 | hypothetical protein; protein id: At4g00530.1          | NA | 0.632  | 0.68   | 0.184  |
| A013060_01 | At4g11990 | putative protein; protein id: At4g11990.1              | NA | -0.272 | 0.036  | 0.219  |
| A013531_01 | At4g09640 | putative protein; protein id: At4g09640.1              | NA | 0.72   | NA     | 0.28   |
| A013767_01 | At4g24130 | putative protein; protein id: At4g24130.1              | NA | 0.371  | 0.781  | 0.534  |
| A013865_01 | At4g01510 | hypothetical protein; protein id: At4g01510.1          | NA | -0.044 | 0.028  | -0.435 |
| A013881_01 | At4g32270 | compared to genome                                     | NA | 0.828  | 1.09   | 1.29   |
| A014044_01 | At4g15230 | ABC transporter like protein; protein id: At4g15230.   | NA | 0.279  | -0.119 | -0.777 |
| A014689_01 | At4g33910 | putative protein; protein id: At4g33910.1              | NA | -0.254 | -0.168 | 0.192  |
| A014744_01 | At4g39800 | myo-inositol-1-phosphate synthase; protein id: At4g    | NA | -0.274 | 0.983  | 1.65   |
| A014791_01 | At4g27450 | unknown protein; protein id: At4g27450                 | NA | -2.979 | -1.902 | -2.803 |
| A014967_01 | At4g23900 | expressed protein; protein id: At4g23900.1             | NA | -0.875 | -0.895 | -1.302 |
| A015087_01 | At4g32680 | expressed protein; protein id: At4g32680.1             | NA | -0.376 | 0.01   | -0.288 |
| A015212_01 | At4g17640 | casein kinase II beta chain CKB2; protein id: At4g1    | NA | -0.643 | -0.346 | -0.277 |
| A015226_01 | At4g15730 | hypothetical protein; protein id: At4g15730.1          | NA | -0.42  | NA     | -0.729 |
| A015340_01 | At4g10950 | putative protein; protein id: At4g10950.1              | NA | 0.312  | -0.323 | -0.163 |
| A015551_01 | At5g04210 | RRM-containing protein; protein id: At5g04210.1        | NA | 0.974  | NA     | 1.068  |
| A015561_01 | At5g64050 | glutamate-tRNA ligase; protein id: At5g64050.1         | NA | 0.024  | 0.033  | -0.129 |
| A015575_01 | At5g08380 | glycosyl hydrolase family 27 (alpha-galactosidase/r    | NA | 0.381  | -0.263 | -0.215 |
| A016276_01 | At5g58240 | bis(5'-adenosyl)-triphosphatase-like; also similar to  | NA | 0.126  | 0.19   | -0.204 |
| A016302_01 | At5g48020 | expressed protein; protein id: At5g48020.1             | NA | -0.703 | 0.032  | 0.156  |
| A016527_01 | At5g56500 | rubisco subunit binding-protein beta subunit precurs   | NA | 1.031  | 1.048  | 1.626  |
| A017523_01 | At5g64740 | cellulose synthase catalytic subunit; protein id: At5g | NA | 0.625  | 0.153  | 0.851  |
| A017547_01 | At5g55970 | putative protein; protein id: At5g55970.1              | NA | -3.268 | -1.617 | -3.272 |
| A017927_01 | At5g12370 | putative protein; protein id: At5g12370.1              | NA | 0.145  | -0.019 | -0.112 |
| A017943_01 | At5g11500 | putative protein; protein id: At5g11500.1              | NA | -0.583 | -0.134 | -0.081 |
| A018485_01 | At5g01030 | putative protein; protein id: At5g01030.1              | NA | -0.474 | -0.218 | -0.366 |
| A018705_01 | At5g44750 | putative protein; protein id: At5g44750.1              | NA | -0.24  | -0.172 | -0.342 |
| A018761_01 | At5g41940 | GTPase activator protein of Rab-like small GTPase: NA  | NA | 0.448  | 0.577  | 1.097  |
| A018765_01 | At5g60470 | putative zinc finger protein; protein id: At5g60470.1  | NA | 0.453  | 0.467  | 1.229  |
| A018790_01 | At5g54360 | unknown protein; protein id: At5g54360.1               | NA | 0.546  | 0.457  | 0.507  |
| A018794_01 | At5g46270 | disease resistance protein (TIR-NBS-LRR class), pi     | NA | 0.036  | 0.187  | 0.311  |
| A018861_01 | At5g54150 | putative protein; protein id: At5g54150.1              | NA | -0.085 | 0.101  | 0.366  |
| A018876_01 | At5g61890 | A.t. genomic DNA, chromosome 5, P1 clone:MQD2          | NA | 0.141  | 0.124  | 0.374  |
| A019001_01 | At5g22440 | 60S ribosomal protein L10A; protein id: At5g22440.     | NA | 0.945  | 0.92   | 1.03   |
| A019031_01 | At5g64240 | expressed protein; protein id: At5g64240.1             | NA | -2.884 | -1.352 | -1.559 |
| A019042_01 | At5g65910 | expressed protein; protein id: At5g65910.1             | NA | -0.772 | NA     | -1.008 |
| A019054_01 | At5g32440 | putative protein; protein id: At5g32440.1              | NA | -0.329 | -0.125 | -0.364 |
| A019079_01 | At5g43150 | unknown protein; protein id: At5g43150.1               | NA | -1.51  | -0.66  | -1.422 |

|            |               |                                                        |    |    |        |        |        |
|------------|---------------|--------------------------------------------------------|----|----|--------|--------|--------|
| A019084_01 | At5g17210     | putative protein; protein id: At5g17210.1              | NA |    | 0.393  | 0.694  | 0.462  |
| A019125_01 | At5g08720     | unknown protein; protein id: At5g08720.1               | NA |    | 0.149  | -0.183 | -0.104 |
| A019185_01 | At5g49580     | putative protein; protein id: At5g49580.1              | NA |    | -0.465 | 0.094  | 0.107  |
| A019226_01 | At5g58040     | putative protein; protein id: At5g58040.1              | NA |    | -0.373 | NA     | -0.576 |
| A019232_01 | At5g05800     | putative protein; protein id: At5g05800.1              | NA |    | -0.465 | -0.153 | -0.093 |
| A019280_01 | At5g14430     | putative protein; protein id: At5g14430.1              | NA |    | 0.014  | -0.359 | 0.48   |
| A019462_01 | not annotated | Chr4 W/150008-150055,150138-150159 downstrea           | NA |    | 0.088  | NA     | 0.095  |
| A019792_01 | At2g41140     | CPDK-related protein kinase; protein id: At2g41140     | NA |    | -0.908 | -0.47  | -0.274 |
| A019986_01 | At1g07700     | expressed protein; protein id: At1g07700.1             | NA |    | -0.815 | -0.446 | -0.44  |
| A019992_01 | At3g04890     | expressed protein; protein id: At3g04890.1             | NA |    | 0.136  | -0.138 | -0.487 |
| A019996_01 | At2g26590     | expressed protein; protein id: At2g26590.1             | NA |    | 0.009  | 0.05   | -0.121 |
| A020426_01 | At2g40600     | expressed protein; protein id: At2g40600.1             | NA |    | -0.264 | -0.031 | 0.439  |
| A020775_01 | At2g40940     | ethylene response sensor (ERS); protein id: At2g40     | NA |    | -0.27  | NA     | -0.413 |
| A020779_01 | At5g42530     | unknown protein; protein id: At5g42530.1               | NA |    | -1.71  | 0.018  | -0.44  |
| A021737_01 | At1g36240     | 60S ribosomal protein L30, putative; protein id: At1c  | NA |    | 0.713  | NA     | NA     |
| A022056_01 | At1g33230     | expressed protein; protein id: At1g33230.1             | NA |    | -0.226 | -0.024 | 0.086  |
| A022274_01 | At4g20020     | DAG-like protein; protein id: At4g20020.1              | NA |    | 0.877  | 0.781  | 0.877  |
| A023555_01 | At2g10020     | hypothetical protein; protein id: At2g10020.1          | NA |    | 0.154  | NA     | -0.123 |
| A024044_01 | At3g01020     | unknown protein; protein id: At3g01020.1               | NA |    | -0.113 | NA     | -0.355 |
| A024170_01 | At3g10300     | unknown protein; protein id: At3g10300.1               | NA |    | 0.244  | -0.237 | -0.502 |
| A024467_01 | At3g17940     | aldose 1-epimerase, putative; protein id: At3g17940    | NA |    | 0.054  | -0.238 | -0.104 |
| A024543_01 | At3g15840     | expressed protein; protein id: At3g15840.1             | NA |    | -1.585 | -1.119 | -2.23  |
| A024776_01 | At4g15545     | expressed protein; protein id: At4g15545.1             | NA |    | -1.149 | -0.8   | -0.52  |
| A025167_01 | At3g14640     | cytochrome P450, putative; protein id: At3g14640.1     | NA |    | -0.912 | -1.167 | -1.889 |
| A025902_01 | At3g23300     | expressed protein; protein id: At3g23300.1             | NA |    | 0.346  | 0.199  | 0.459  |
| A026000_01 | At3g14660     | cytochrome P450, putative; protein id: At3g14660.1     | NA |    | -0.643 | -0.497 | -1.423 |
| A026032_01 | At2g14470     | putative helicase; protein id: At2g14470.1             | NA |    | -1.221 | -0.641 | -0.946 |
| A000572_01 | At1g19430     | expressed protein; protein id: At1g19430.1             | NA | NA | NA     |        | -0.311 |
| A004818_01 | At1g12750     | membrane protein, putative; protein id: At1g12750.1    | NA | NA | NA     |        | -0.618 |
| A005988_01 | At4g00730     | homeodomain protein AHDP; protein id: At4g00730        | NA | NA |        | -0.53  | -1     |
| A006161_01 | At2g43820     | putative glucosyltransferase; protein id: At2g43820.   | NA | NA |        | -1.775 | -3.042 |
| A007292_01 | At2g35110     | unknown protein; protein id: At2g35110.1               | NA | NA |        | -0.346 | -0.99  |
| A007713_01 | At2g34900     | putative RING3 protein; protein id: At2g34900.1        | NA | NA |        | 0.457  | 0.715  |
| A009463_01 | At3g52530     | putative protein; protein id: At3g52530.1              | NA | NA |        | NA     | -1.174 |
| A011646_01 | At3g10670     | ABC transporter family protein; protein id: At3g1067   | NA | NA |        | -0.09  | -0.206 |
| A012457_01 | At3g50250     | putative protein; protein id: At3g50250.1              | NA | NA |        | NA     | -0.49  |
| A012674_01 | At3g04060     | NAM-like protein (no apical meristem); protein id: At  | NA | NA |        | NA     | NA     |
| A016524_01 | At5g43920     | WD-repeat protein-like; protein id: At5g43920.1        | NA | NA |        | -0.789 | -0.668 |
| A017134_01 | At5g17580     | putative protein; protein id: At5g17580.1              | NA | NA |        | -0.785 | -1.169 |
| A018784_01 | At5g51520     | ripening-related protein-like; protein id: At5g51520.1 | NA | NA |        | -0.321 | -0.672 |
| A019101_01 | At5g16830     | syntaxin SYP21 (PEP12); protein id: At5g16830.1        | NA | NA |        | -0.64  | -0.767 |
| A020277_01 | At5g54310     | expressed protein; protein id: At5g54310.1             | NA | NA |        | -0.556 | -0.498 |
| A024469_01 | At5g59820     | zinc finger protein Zat12; protein id: At5g59820.1     | NA | NA |        | -1.053 | -2.38  |
| A024824_01 | At3g46670     | glucosyltransferase-like protein; protein id: At3g466  | NA | NA |        | -0.056 | -0.334 |
| A005098_01 | At1g75530     | hypothetical protein; protein id: At1g75530.1          | NA | NA |        | NA     | -0.705 |

| Oligo ID   | 2-3 DPA A | 2-3 DPA A<br>dye swap | 2-3 DPA B | 2-3 DPA B<br>dye swap | 4-5 DPA A | 4-5 DPA A<br>dye swap | 4-5 DPA B | 4-5 DPA B<br>dye swap |
|------------|-----------|-----------------------|-----------|-----------------------|-----------|-----------------------|-----------|-----------------------|
| A000001_01 | 0.077     | 0.048                 | -0.124    | -0.168                | 0.362     | 0.488                 | -0.079    | -0.176                |
| A000002_01 | -0.033    | 0.284                 | -0.295    | -0.33                 | -0.009    | 0.404                 | -0.141    | 0.226                 |
| A000003_01 | -0.163    | -0.161                | -0.236    | 0.44                  | -0.181    | -0.16                 | -0.612    | NA                    |
| A000004_01 | 0.233     | 0.235                 | -0.221    | -0.355                | 0.245     | 0.179                 | -0.057    | -0.02                 |
| A000006_01 | 0.848     | 1.008                 | 0.29      | -0.195                | -0.292    | 0.534                 | 0.058     | 0.021                 |
| A000012_01 | -0.071    | -0.022                | 0.099     | 0.028                 | -0.157    | -0.001                | -0.105    | -0.003                |
| A000013_01 | 0.069     | 0.488                 | -0.197    | -0.051                | -0.031    | 0.426                 | -0.234    | 0.145                 |
| A000016_01 | -0.168    | -0.128                | -0.082    | 0.086                 | -0.117    | -0.104                | 0.01      | 0.15                  |
| A000017_01 | 0.194     | 0.228                 | 0.132     | -0.276                | 0.071     | 0.287                 | 0.014     | 0.111                 |
| A000020_01 | -0.058    | -0.018                | 0.148     | 0.319                 | -0.044    | -0.145                | -0.21     | 0.019                 |
| A000021_01 | 0.546     | 0.676                 | 0.051     | 0.133                 | -0.148    | -0.004                | -0.081    | -0.059                |
| A000022_01 | -0.748    | -0.644                | -0.666    | -0.43                 | -0.232    | -0.163                | -0.176    | 0.193                 |
| A000025_01 | 0.256     | 0.217                 | 0.016     | 0.026                 | 0.141     | 0.101                 | -0.025    | -0.086                |
| A000026_01 | 0.231     | 0.516                 | 0.189     | 0.424                 | -0.063    | 0.385                 | -0.15     | -0.067                |
| A000027_01 | 0.073     | 0.196                 | -0.391    | 0.108                 | 0.074     | 0.154                 | 0.138     | 0.442                 |
| A000029_01 | 0.162     | 0.365                 | 0.165     | NA                    | -0.545    | NA                    | NA        | NA                    |
| A000031_01 | 0.428     | 0.509                 | 0.277     | 0.403                 | -0.383    | -0.668                | 0.306     | 0.311                 |
| A000038_01 | -0.449    | -0.201                | 0.084     | -0.02                 | -0.192    | -0.022                | -0.111    | 0.251                 |
| A000040_01 | -0.393    | -0.15                 | -0.284    | 0.268                 | -0.116    | -0.112                | 0.051     | 0.363                 |
| A000041_01 | 0.092     | 0.026                 | -0.54     | 0.16                  | 0.07      | 0.24                  | 0.022     | -0.074                |
| A000042_01 | -0.264    | 0.483                 | 0.096     | 0.21                  | -0.28     | 0.431                 | -0.104    | 0.272                 |
| A000046_01 | -0.051    | 0.256                 | 0.266     | 0.107                 | -0.095    | 0.393                 | 0.137     | 0.368                 |
| A000047_01 | -0.684    | -0.551                | NA        | NA                    | -0.4      | -0.31                 | -1.085    | NA                    |
| A000051_01 | -0.222    | 0.069                 | -0.316    | 0.498                 | -0.517    | -0.087                | -0.311    | NA                    |
| A000052_01 | -0.144    | 0.366                 | -0.576    | NA                    | -0.141    | 0.023                 | -0.461    | NA                    |
| A000055_01 | 0.078     | 0.453                 | -0.133    | 0.455                 | 0.459     | 0.897                 | 0.123     | 0.19                  |
| A000056_01 | -0.301    | -0.347                | -0.378    | 0.268                 | -0.123    | 0.028                 | -0.195    | 0.06                  |
| A000058_01 | 0.199     | 0.486                 | 0.413     | 0.42                  | -0.004    | NA                    | 0.158     | 0.376                 |
| A000061_01 | 0.229     | 0.462                 | -0.456    | -0.002                | 0.366     | 0.56                  | -0.406    | -0.412                |
| A000063_01 | -0.159    | -0.146                | -0.234    | 0.165                 | -0.261    | -0.168                | -0.28     | -0.079                |
| A000064_01 | -0.3      | -0.064                | 0.409     | 0.218                 | -0.414    | -0.356                | 0.047     | NA                    |
| A000065_01 | -0.704    | -0.58                 | -0.227    | 0.091                 | -0.425    | -0.323                | 0.036     | 0.32                  |
| A000067_01 | -0.789    | NA                    | NA        | 0.385                 | -0.733    | NA                    | -0.563    | NA                    |
| A000069_01 | -0.62     | -0.312                | NA        | NA                    | -0.284    | -0.144                | -0.395    | NA                    |
| A000073_01 | 0.664     | 0.845                 | 0.803     | 0.317                 | 0.216     | 0.596                 | 0.258     | 0.413                 |
| A000074_01 | -0.714    | -0.308                | -0.393    | 0.174                 | -0.417    | -0.082                | -0.219    | 0.047                 |
| A000077_01 | -0.468    | -0.439                | -0.363    | 0.178                 | -0.094    | 0.013                 | -0.303    | NA                    |
| A000080_01 | 0.011     | 0.135                 | 0.175     | 0.667                 | 0.009     | 0.062                 | 0.088     | 0.335                 |
| A000084_01 | -0.545    | -0.173                | NA        | 0.494                 | 0.013     | 0.005                 | -0.103    | 0.332                 |
| A000088_01 | 0.069     | 0.218                 | 0.166     | 0.264                 | -0.051    | 0.083                 | 0.139     | 0.191                 |
| A000091_01 | -0.149    | -0.168                | 0.237     | -0.063                | 0.288     | 0.082                 | 0.35      | 0.175                 |
| A000095_01 | -0.554    | -0.016                | NA        | NA                    | -0.29     | -0.065                | NA        | NA                    |
| A000098_01 | -0.267    | -0.079                | -0.57     | -0.356                | 0.38      | 0.535                 | -0.041    | 0.088                 |
| A000107_01 | -0.979    | -0.89                 | -0.956    | -0.56                 | -0.78     | -0.825                | -0.519    | -0.113                |
| A000111_01 | -0.366    | -0.224                | -0.355    | 0.131                 | -0.201    | -0.16                 | -0.008    | 0.149                 |
| A000113_01 | -0.306    | 0.028                 | -0.001    | 0.498                 | -0.195    | -0.107                | -0.321    | 0.009                 |
| A000115_01 | -0.122    | -0.142                | 0.302     | 0.297                 | 0.086     | 0.118                 | 0.299     | 0.107                 |
| A000120_01 | 0.147     | 0.627                 | 0.446     | NA                    | 0.36      | 0.753                 | 0.023     | NA                    |
| A000123_01 | -0.217    | NA                    | 0.42      | 0.819                 | -0.493    | NA                    | 0.105     | NA                    |
| A000124_01 | -0.833    | -0.404                | -0.021    | -0.16                 | -0.162    | 0.267                 | 0.288     | 0.555                 |
| A000134_01 | -0.332    | -0.477                | 0.069     | 0.541                 | -0.278    | -0.375                | 0.636     | 0.428                 |
| A000138_01 | -0.304    | -0.069                | -0.087    | 0.215                 | -0.067    | 0.211                 | -0.009    | 0.128                 |
| A000146_01 | 0.486     | 0.789                 | NA        | 0.715                 | 0.394     | 0.5                   | NA        | NA                    |
| A000150_01 | -0.697    | -0.543                | -0.297    | 0.053                 | -0.513    | -0.518                | -0.198    | -0.123                |
| A000157_01 | 0.33      | 0.47                  | 0.773     | 0.845                 | -0.37     | -0.156                | 0.084     | 0.123                 |
| A000169_01 | -0.253    | 0.071                 | 0.233     | 0.213                 | -0.357    | NA                    | 0.272     | 0.476                 |
| A000173_01 | -0.23     | -0.045                | 0.249     | 0.005                 | -0.138    | -0.104                | 0.009     | 0.082                 |
| A000179_01 | 0.099     | 0.469                 | 0.315     | 0.384                 | -0.166    | 0.051                 | -0.309    | 0.139                 |

|            |        |        |        |        |        |        |        |        |
|------------|--------|--------|--------|--------|--------|--------|--------|--------|
| A000185_01 | -0.1   | 0.062  | NA     | NA     | -0.278 | 0.126  | -0.262 | 0.205  |
| A000187_01 | -1.412 | NA     | NA     | NA     | -0.725 | 0.46   | -0.219 | 0.651  |
| A000198_01 | -0.014 | 0.253  | NA     | NA     | -0.013 | 0.344  | -0.054 | 0.047  |
| A000202_01 | -0.161 | NA     | -0.37  | -0.353 | -0.032 | 0.652  | 0.247  | 0.196  |
| A000220_01 | -0.601 | -0.407 | 0.233  | -0.159 | 0.151  | 0.166  | -0.201 | -0.116 |
| A000223_01 | 0.454  | 0.53   | -0.044 | -0.168 | 0.156  | 0.647  | -0.181 | -0.184 |
| A000226_01 | -0.777 | -0.629 | 0.127  | 0.456  | -0.336 | -0.412 | 0.055  | 0.092  |
| A000233_01 | -0.584 | -0.196 | NA     | 0.313  | -0.385 | 0.03   | -0.16  | 0.259  |
| A000239_01 | -0.088 | 0.268  | -0.097 | 0.096  | -0.196 | 0.42   | -0.288 | -0.072 |
| A000248_01 | -0.473 | -0.526 | NA     | NA     | -0.219 | -0.346 | -1.025 | NA     |
| A000253_01 | 0.351  | 0.2    | 0.366  | 0.439  | 0.044  | 0.059  | 0.307  | 0.17   |
| A000259_01 | -0.287 | -0.439 | -0.134 | 0.02   | -0.083 | -0.345 | -0.371 | -0.248 |
| A000260_01 | -0.117 | -0.162 | -0.781 | -0.331 | -0.172 | -0.11  | -0.206 | -0.179 |
| A000261_01 | -0.141 | 0.157  | 0.102  | 0.222  | -0.107 | -0.021 | 0.002  | 0.329  |
| A000263_01 | -0.075 | 0.227  | 0.283  | 0.74   | -0.087 | -0.009 | 0.058  | 0.203  |
| A000268_01 | -0.375 | -0.434 | -0.135 | 0.032  | -0.01  | -0.386 | -0.169 | -0.208 |
| A000269_01 | -0.133 | 0.051  | -0.08  | -0.091 | -0.258 | 0.116  | -0.078 | 0.031  |
| A000270_01 | -0.138 | 0.147  | -0.088 | 0.236  | -0.119 | 0.374  | -0.293 | 0.079  |
| A000297_01 | -0.58  | NA     | -0.487 | -0.265 | -0.216 | 0.092  | -0.196 | 0.124  |
| A000301_01 | -1.689 | -1.529 | -1.015 | -0.555 | -0.84  | -0.687 | -0.228 | -0.022 |
| A000302_01 | -0.14  | 0.128  | NA     | NA     | -0.023 | NA     | NA     | NA     |
| A000303_01 | 0.521  | 0.621  | 0.2    | -0.069 | 0.076  | 0.351  | 0.128  | 0.265  |
| A000305_01 | 0.15   | 0.524  | 0.372  | 0.079  | 0.062  | 0.143  | -0.137 | -0.046 |
| A000319_01 | 0.789  | 0.742  | 1.032  | 1.179  | 0.888  | 0.938  | 0.206  | 0.186  |
| A000321_01 | -0.218 | 0.328  | 0.109  | 0.848  | -0.217 | NA     | 0.316  | 0.506  |
| A000322_01 | -0.17  | 0.023  | 0.227  | 0.186  | -0.007 | 0.166  | 0.061  | 0.194  |
| A000324_01 | 0.07   | 0.369  | 0.255  | 0.493  | -0.383 | -0.154 | 0.182  | NA     |
| A000325_01 | -0.552 | -0.241 | -0.823 | -0.649 | -0.641 | -0.242 | -0.662 | -0.401 |
| A000326_01 | 0.14   | 0.369  | 0.128  | 0.194  | -0.113 | -0.015 | 0.056  | NA     |
| A000329_01 | -0.103 | -0.169 | 0.114  | 0.014  | 0.272  | 0.301  | -0.228 | 0.005  |
| A000336_01 | -0.21  | 0.012  | -0.21  | 0.122  | 0.007  | -0.042 | 0.103  | 0.135  |
| A000337_01 | -0.187 | 0.182  | -0.199 | 0.569  | 0.054  | 0.364  | -0.223 | NA     |
| A000340_01 | -0.596 | -0.069 | 0.086  | 0.106  | -0.597 | -0.077 | -0.173 | 0.192  |
| A000348_01 | -0.725 | -0.527 | NA     | -0.643 | -1.174 | -1.164 | -1.321 | -0.569 |
| A000351_01 | -0.116 | -0.213 | -0.194 | 0.14   | -0.171 | -0.213 | -0.261 | -0.219 |
| A000352_01 | -0.535 | -0.371 | -0.472 | 0.185  | -0.431 | -0.436 | -0.508 | NA     |
| A000353_01 | 0.541  | 0.436  | -0.193 | -0.83  | 0.264  | 0.488  | -0.217 | -0.202 |
| A000355_01 | -0.429 | 0.247  | -0.502 | 0.471  | -0.112 | 0.42   | -0.448 | 0.471  |
| A000358_01 | -0.299 | -0.084 | -0.28  | 0.112  | -0.262 | -0.222 | -0.446 | -0.187 |
| A000364_01 | 0.198  | 0.214  | -0.321 | 0.073  | -0.162 | NA     | -0.082 | 0.068  |
| A000365_01 | -0.599 | NA     | NA     | 0.07   | -0.01  | NA     | -0.265 | 0.162  |
| A000368_01 | -0.116 | -0.1   | 0.034  | -0.206 | 0.331  | 0.136  | -0.004 | NA     |
| A000371_01 | -0.193 | -0.291 | -0.285 | 0.026  | -0.095 | -0.241 | -0.044 | -0.115 |
| A000373_01 | -0.349 | -0.107 | -0.197 | 0.517  | -0.289 | -0.192 | -0.317 | NA     |
| A000377_01 | -0.061 | -0.215 | -0.168 | -0.541 | -0.258 | -0.138 | -0.363 | -0.036 |
| A000382_01 | 0.797  | 0.992  | 0.648  | 0.525  | 0.611  | 0.954  | -0.392 | -0.263 |
| A000384_01 | -0.164 | 0.362  | -0.525 | 0.495  | -0.098 | NA     | -0.324 | NA     |
| A000389_01 | -1.929 | NA     | NA     | NA     | -1.469 | -1.588 | -0.691 | NA     |
| A000396_01 | -0.183 | 0.123  | -0.297 | 0.274  | -0.196 | 0.145  | -0.164 | -0.01  |
| A000402_01 | -0.569 | NA     | 0.396  | 0.672  | -0.475 | -0.203 | 0.252  | NA     |
| A000406_01 | 0.367  | 0.44   | 0.341  | 0.513  | -0.098 | -0.146 | 0.044  | 0.183  |
| A000410_01 | -0.24  | -0.269 | 0.028  | -0.067 | -0.053 | 0.053  | -0.117 | 0.013  |
| A000412_01 | -0.143 | 0.047  | -0.277 | 0.129  | -0.025 | 0.19   | -0.186 | 0.089  |
| A000419_01 | -0.412 | -0.163 | 0.004  | -0.186 | -0.36  | -0.13  | -0.128 | 0.046  |
| A000420_01 | -0.217 | -0.019 | -0.325 | NA     | -0.148 | 0.025  | 0.122  | NA     |
| A000423_01 | -0.588 | -0.148 | NA     | NA     | -0.07  | 0.274  | -0.347 | 0.436  |
| A000426_01 | 0.078  | 0.282  | 0.151  | 0.171  | -0.087 | 0.15   | 0.02   | 0.183  |
| A000454_01 | -0.44  | -0.505 | -0.273 | -0.351 | -0.323 | -0.383 | -0.209 | -0.048 |
| A000455_01 | -0.748 | NA     | NA     | 0.358  | -0.585 | NA     | NA     | 0.065  |
| A000462_01 | 0.058  | 0.254  | -0.39  | 0.439  | -0.215 | 0.44   | 0.01   | -0.003 |
| A000471_01 | -0.281 | 0.09   | -0.21  | 0.324  | -0.418 | NA     | -0.239 | 0.084  |
| A000473_01 | 0.406  | 0.406  | 0.534  | 0.692  | 0.284  | 0.349  | -0.153 | -0.179 |
| A000478_01 | -0.173 | 0.079  | -0.013 | 0.273  | -0.047 | 0.156  | -0.055 | 0.107  |
| A000479_01 | -0.182 | 0.077  | -0.062 | 0.018  | -0.225 | NA     | -0.052 | NA     |
| A000489_01 | -0.661 | -0.464 | -0.772 | -0.915 | -0.2   | 0.042  | -0.359 | -0.258 |
| A000500_01 | -0.652 | -0.167 | -0.084 | 0.193  | -0.311 | -0.093 | -0.264 | 0.073  |
| A000511_01 | -0.061 | 0.43   | 0.292  | 0.688  | 0.425  | 0.525  | 0.375  | 0.448  |
| A000517_01 | -0.158 | -0.058 | -0.085 | -0.123 | 0.012  | 0.115  | -0.062 | 0.105  |



|            |        |           |          |           |           |        |           |        |
|------------|--------|-----------|----------|-----------|-----------|--------|-----------|--------|
| A000519_01 | 0.572  | 0.612     | 0.294    | -0.136    | -0.008    | 0.325  | 0.046     | 0.066  |
| A000523_01 | -0.193 | 0.041     | 0.212    | 0.126     | 0.183     | 0.142  | 0.002     | 0.23   |
| A000525_01 | -0.575 | -0.301    | -0.907   | -0.737    | -0.355    | -0.156 | -0.211 NA |        |
| A000526_01 | -0.639 | -0.127    | -0.275   | 0.059     | -0.445    | 0.131  | -0.472    | 0.067  |
| A000533_01 | -0.253 | -0.302    | 0.305    | 0.132     | -0.012    | -0.133 | -0.086    | -0.043 |
| A000534_01 | -0.236 | 0.156     | 0.092    | 0.112     | 0.038     | 0.192  | 0.318     | 0.305  |
| A000543_01 | 0.636  | 0.576     | 0.372    | 0.289     | 0.059     | 0.324  | -0.054    | -0.252 |
| A000548_01 | 0.362  | 0.412     | 0.855    | 1.144     | 0.005     | 0.094  | 0.089     | 0.129  |
| A000553_01 | -0.095 | -0.006    | -0.292   | 0.538     | -0.572    | -0.216 | -0.057    | 0.204  |
| A000555_01 | -0.129 | 0.198     | 0.238    | -0.352    | -0.315    | 0.336  | 0.604     | 0.342  |
| A000559_01 | -0.128 | 0.344     | -0.145   | -0.203    | -0.2      | 0.094  | -0.181    | 0.178  |
| A000567_01 | -0.313 | -0.248    | -0.453   | -0.286    | -0.1      | -0.048 | -0.05     | -0.233 |
| A000568_01 | 0.149  | 0.237     | 0.468    | 0.338     | 0.373     | 0.328  | -0.034    | -0.124 |
| A000577_01 | -0.249 | -0.402    | -0.039   | -0.135    | 0.195     | -0.036 | 0.017     | 0.024  |
| A000579_01 | -2.151 | -2.175    | -1.807   | -0.815    | -1.455    | -1.591 | 0.019     | 0.077  |
| A000582_01 | -0.462 | -0.456    | -0.329   | -0.565    | -0.181    | -0.13  | -0.31     | -0.217 |
| A000589_01 | 0.278  | 0.405     | 0.134    | 0.475     | -0.052    | 0.082  | -0.121    | 0.009  |
| A000590_01 | -0.31  | -0.146    | -0.14    | 0.309     | -0.383    | -0.108 | -0.087    | 0.293  |
| A000592_01 | -1.223 | -1.267 NA |          | -0.834    | -0.588    | -0.713 | -0.476    | -0.068 |
| A000600_01 | -0.408 | -0.126    | -0.274   | 0.269     | 0.126     | 0.17   | 0.556     | 0.566  |
| A000608_01 | -0.077 | -0.025    | 0.069    | 0.008     | 0.221     | 0.088  | -0.024    | 0.216  |
| A000610_01 | 0.163  | 0.549     | -0.019   | 0.484     | 0.006     | 0.38   | 0.032     | 0.079  |
| A000612_01 | -0.453 | -0.444    | -0.272   | 0.259     | 0.142     | 0.21   | 0.149     | 0.248  |
| A000613_01 | -0.673 | -0.513    | -0.412   | 0.469     | -0.392    | -0.25  | -0.223    | 0.041  |
| A000618_01 | 0.195  | 0.436     | 0.303    | 0.363     | -0.131 NA |        | 0.13      | 0.15   |
| A000619_01 | -3.26  | -3.536    | -2.573   | -2.012    | -2.045    | -2.276 | -1.336    | -0.801 |
| A000622_01 | -0.576 | -0.326    | -0.301   | -0.02     | -0.119    | -0.112 | -0.178    | 0.014  |
| A000629_01 | -0.052 | -0.154    | 0.137    | 0.058     | 0.029     | -0.166 | 0.064 NA  |        |
| A000633_01 | -0.141 | 0.012     | 0.237    | 0.223     | 0.421     | 0.524  | -0.089    | -0.057 |
| A000637_01 | -0.094 | 0.344     | 0.373 NA |           | -0.019    | 0.249  | 0.147     | 0.243  |
| A000638_01 | -0.238 | -0.094    | -0.033   | 0.481     | -0.313 NA |        | -0.084    | 0.053  |
| A000639_01 | 0.203  | 0.112     | -0.553   | -0.318    | 0.187     | 0.379  | -0.117    | -0.182 |
| A000643_01 | -0.063 | -0.015    | 0.117    | 0.167     | 0.006     | 0.107  | -0.068    | -0.075 |
| A000645_01 | 0.034  | 0.084     | 0.166    | 0.038     | 0.196     | 0.186  | -0.076    | 0.031  |
| A000649_01 | -0.324 | -0.167    | -0.059   | -0.43     | 0.02      | 0.227  | 0.056     | 0.188  |
| A000650_01 | -0.407 | -0.336    | -0.102   | 0.121     | -0.165    | 0.014  | -0.163    | 0.025  |
| A000652_01 | -0.214 | -0.165    | -0.373   | -0.368    | 0.361     | 0.546  | 0.016     | 0.013  |
| A000653_01 | -0.583 | -0.362    | -0.192   | -0.013    | 0.052     | 0.202  | 0.042     | 0.028  |
| A000657_01 | -0.26  | -0.121    | 0.012    | 0.503     | -0.068    | 0.058  | -0.117    | -0.018 |
| A000665_01 | -0.29  | -0.239    | -0.311   | -0.031    | 0.047     | 0.421  | -0.206    | 0.064  |
| A000668_01 | -0.495 | -0.17     | -0.632   | -0.704    | -0.13     | 0.108  | -0.352    | 0.048  |
| A000677_01 | 0.051  | 0.093     | 0.539    | 0.723     | 0.12      | 0.458  | 0.046     | 0.224  |
| A000684_01 | -0.463 | -0.285 NA |          | 0.239     | -0.278    | 0.198  | -0.236 NA |        |
| A000685_01 | 0.144  | 0.383     | 0.005    | 0.131     | -0.15     | 0.385  | -0.116    | 0.215  |
| A000687_01 | 0.053  | 0.358     | 0.146    | 0.353     | -0.12     | 0.103  | -0.117    | 0.29   |
| A000692_01 | -0.106 | 0.046     | -0.203   | -0.3      | 0.149     | 0.206  | 0.001     | 0.019  |
| A000696_01 | -1.002 | -0.783    | -0.601   | -0.656    | -0.561    | -0.341 | -0.06     | 0.166  |
| A000697_01 | 0.1    | 0.385     | 0.076    | 0.325     | 0.111     | 0.179  | -0.071    | 0.259  |
| A000700_01 | -0.083 | -0.128    | -0.392   | 0         | 0.124     | 0.082  | -0.094    | -0.253 |
| A000701_01 | 0.138  | 0.293     | -0.325   | 0.076     | 0.169     | 0.394  | -0.038    | 0.011  |
| A000710_01 | -0.236 | 0.127     | 0.55     | 0.501     | -0.115    | 0.054  | -0.151    | 0.063  |
| A000711_01 | -0.248 | 0.143     | -0.172   | 0.311     | -0.212    | 0.25   | -0.243    | 0.08   |
| A000722_01 | -0.484 | -0.44     | -0.691   | -0.081    | -0.12     | -0.011 | -0.044    | 0.153  |
| A000727_01 | -0.296 | -0.372    | -0.311   | -0.06     | -0.25     | -0.236 | 0.002     | 0.084  |
| A000731_01 | -0.413 | -0.33     | -0.546   | -1.078 NA |           | 0.332  | -0.096    | 0.013  |
| A000742_01 | 0.545  | 0.701     | 0.282    | 0.504     | -0.241    | 0.011  | 0.08      | 0.044  |
| A000755_01 | -0.365 | -0.176    | -0.936   | -0.61     | -0.248    | 0.004  | -0.36     | -0.102 |
| A000757_01 | -0.012 | 0.38 NA   | NA       |           | -0.082    | 0.208  | -0.08     | 0.3    |
| A000759_01 | 0.031  | 0.358     | 0.121    | -0.013    | 0.082     | 0.531  | -0.004    | -0.015 |
| A000764_01 | -0.358 | -0.177    | 0.129    | 0.143     | -0.058    | -0.126 | 0.119     | 0.477  |
| A000770_01 | 0.383  | 0.607     | 0.275    | 0.081     | 0.2       | 0.56   | 0.025     | 0.238  |
| A000775_01 | -0.112 | 0.041     | 0.056    | 0.124     | -0.125    | -0.147 | -0.03     | 0.131  |
| A000781_01 | -0.629 | -0.5      | -0.212   | 0.323     | -0.076    | -0.164 | -0.359    | -0.069 |
| A000782_01 | -0.066 | 0.241     | 0.342    | 0.837     | 0.168     | 0.276  | -0.304 NA |        |
| A000794_01 | -0.101 | 0.303     | -0.051   | 0.642     | 0.109     | -0.02  | -0.108 NA |        |
| A000795_01 | 0.034  | 0.15      | 0.239    | -0.36     | 0.414     | 0.533  | 0.695     | 0.799  |
| A000801_01 | 0.481  | 0.601     | 0.341    | 0.34      | 0.112     | 0.323  | -0.003    | -0.063 |
| A000802_01 | -0.444 | -0.08     | 0.074    | 0.101     | -0.121    | -0.015 | 0.006     | 0.308  |

|            |           |           |           |           |           |        |           |        |
|------------|-----------|-----------|-----------|-----------|-----------|--------|-----------|--------|
| A000803_01 | 0.013     | 0.057     | -0.115    | 0.232     | 0.045     | 0.154  | -0.322    | -0.091 |
| A000807_01 | -0.249 NA |           | 0.068     | 0.196     | -0.293 NA |        | -0.087 NA |        |
| A000808_01 | -0.468    | -0.109    | -0.135    | 0.72      | 0.339     | 0.612  | 0.135     | 0.348  |
| A000814_01 | 0.516     | 0.638     | 0.083     | -0.348    | -0.219    | 0.402  | 0.287     | 0.372  |
| A000827_01 | -0.108    | -0.159    | -0.397    | -0.074    | 0.389     | 0.359  | -0.511    | -0.364 |
| A000828_01 | 0.148     | 0.124     | -0.701    | -0.252    | 0.2       | 0.361  | -0.255    | -0.012 |
| A000835_01 | 0.214     | 0.143     | -0.359 NA |           | 0.024     | -0.031 | -0.407    | -0.045 |
| A000842_01 | 0.046     | 0.365     | -0.523    | -0.255    | 0.058     | 0.459  | -0.255    | 0.167  |
| A000851_01 | 1.027     | 1.304     | 0.555     | 0.836     | -0.071    | 0.315  | 0.009     | 0.453  |
| A000853_01 | -0.202    | 0.029     | -0.108    | 0.241     | 0.12      | 0.071  | -0.061    | 0.028  |
| A000856_01 | 0.101     | 0.158     | -0.18     | 0.477     | 0.451     | 0.33   | -0.334    | -0.305 |
| A000875_01 | -0.05     | 0.037     | -0.181    | 0.251     | 0.043     | 0.132  | -0.007    | 0.175  |
| A000880_01 | -0.868    | -0.473 NA |           | NA        | -0.418 NA |        | -0.671 NA |        |
| A000888_01 | 0.587     | 0.547     | 0.178     | 0.676     | 0.406     | 0.451  | 0.062     | 0.269  |
| A000897_01 | 0.059     | 0.328     | -0.274    | 0.178     | -0.249 NA |        | -0.211    | 0.304  |
| A000903_01 | -0.313 NA |           | NA        | -0.378    | -0.236 NA |        | -0.002    | 0.331  |
| A000910_01 | -0.021    | 0.132     | 0.018     | 0.405     | 0.094 NA  |        | 0.007     | 0.296  |
| A000919_01 | 0.191     | 0.335     | 0.346     | 0.138     | 0.036     | 0.204  | -0.128    | 0.108  |
| A000922_01 | -0.143    | -0.069    | 0.281     | 0.461     | 0.061     | -0.069 | -0.211    | 0.047  |
| A000936_01 | -0.094    | -0.05     | -0.095    | 0.143     | 0.227     | 0.185  | -0.119    | 0.106  |
| A000937_01 | -0.183    | -0.271    | -0.026    | -0.301    | 0.243     | 0.196  | 0.113     | 0.004  |
| A000941_01 | 0.014     | 0.246     | -0.491    | -0.249    | -0.291    | 0.462  | -0.255    | -0.11  |
| A000945_01 | -0.085 NA |           | -0.26     | -0.042 NA |           | NA     | -0.118    | 0.066  |
| A000953_01 | -0.31     | -0.309    | -0.206    | 0.175     | -0.146    | -0.151 | -0.07     | 0.022  |
| A000960_01 | -0.175    | -0.065    | -0.537    | 0.528     | 0.039     | 0.153  | -0.099 NA |        |
| A000962_01 | -0.147    | -0.096    | -0.08     | -0.361    | 0.101     | -0.092 | 0.151     | 0.121  |
| A000970_01 | 0.119     | 0.118     | 0.237     | 0.399     | -0.08     | -0.34  | -0.215    | -0.196 |
| A000974_01 | -0.212    | 0.045     | 0.265     | 0.218     | -0.164    | 0.094  | 0.276     | 0.394  |
| A000984_01 | -0.266    | -0.199    | 0.075     | 0.231     | -0.013    | -0.053 | -0.033    | 0.11   |
| A000987_01 | 0.019     | 0.136     | 0.021 NA  |           | 0.076     | -0.218 | -0.27 NA  |        |
| A000988_01 | 0.012     | -0.055    | 0.398     | 0.067     | 0.272     | 0.363  | 0.451     | 0.339  |
| A000992_01 | 0.302     | 0.258     | 0.169     | 0.621     | -0.202    | -0.187 | -0.139    | 0.088  |
| A000997_01 | 0.309     | 0.265     | -0.404    | -0.238    | 0.056     | 0.271  | -0.023    | 0.041  |
| A001006_01 | -0.047    | 0.171     | 0.28      | 0.766     | -0.129    | 0.1    | 0.005     | 0.282  |
| A001007_01 | -0.274    | 0.186     | -0.031    | 0.058     | 0.087     | 0.25   | 0.106     | 0.418  |
| A001011_01 | -0.426    | -0.064    | -0.281    | 0.19      | -0.429    | -0.183 | -0.302    | 0.251  |
| A001012_01 | 0.2       | 0.172     | 0.071     | 0.668     | -0.154    | -0.295 | 0.045     | 0.051  |
| A001017_01 | 0.81      | 0.778     | -0.202    | -0.027    | -0.159    | 0.558  | -0.066    | 0.008  |
| A001019_01 | 0.3       | 0.091     | 0.367     | 0.476     | 0.394     | 0.187  | 0.012     | -0.009 |
| A001023_01 | -0.939    | -1.311 NA |           | NA        | 0.307     | 0.319  | -1.015 NA |        |
| A001029_01 | 0.2       | 0.212     | -0.064    | 0.014     | 0.091     | 0.403  | 0.006     | 0.127  |
| A001031_01 | -0.534    | -0.185    | -0.074    | 0.025     | -0.288    | -0.029 | -0.22 NA  |        |
| A001032_01 | -0.237    | -0.236    | -0.092    | 0.228     | -0.263    | -0.326 | -0.039    | 0.053  |
| A001034_01 | 0.176     | 0.263     | 0.029     | -0.263    | 0.076     | 0.096  | 0.172     | 0.208  |
| A001035_01 | -0.307    | -0.236    | -0.106    | -0.029    | -0.094    | -0.097 | -0.025    | 0.081  |
| A001036_01 | 0.168     | 0.123     | -0.516    | -0.521    | 0.036     | 0.051  | -1.031    | -0.464 |
| A001041_01 | 0.042     | 0.214     | -0.038    | 0.365     | 0.027     | 0.35   | -0.048    | 0.102  |
| A001042_01 | -0.078    | 0.2 NA    |           | 0.452     | -0.422 NA |        | 0.22      | 0.543  |
| A001043_01 | 0.238     | 0.346     | 0.016     | -0.196    | -0.168    | 0.456  | -0.122    | 0.093  |
| A001044_01 | -0.406    | -0.085 NA |           | NA        | 0.356     | 0.575  | -0.435 NA |        |
| A001045_01 | -0.085    | 0.12      | -0.011    | -0.077    | -0.093    | 0.146  | -0.074    | -0.017 |
| A001048_01 | 0.32      | 0.492     | 0.177     | -0.304    | 0.164     | 0.239  | -0.101    | 0.042  |
| A001052_01 | -0.244    | -0.376    | -0.733    | -0.14     | -0.122    | -0.287 | -0.273    | -0.238 |
| A001053_01 | -0.067    | 0.026     | -0.204    | 0.076     | 0.004     | 0.071  | -0.036    | 0.054  |
| A001056_01 | 0.249     | 0.545     | 0.311     | 0.189     | -0.135    | -0.015 | -0.418 NA |        |
| A001059_01 | 0.005     | 0.244     | -0.248    | -0.218    | -0.61     | 0.007  | 0.157     | 0.254  |
| A001071_01 | 0.033     | 0.344     | -0.043    | 0.526     | -0.026    | 0.496  | -0.363    | 0.233  |
| A001077_01 | 0.743     | 0.818     | 0.01      | 0.111     | -0.099    | 0.498  | -0.14     | 0.114  |
| A001082_01 | 0.399     | 0.378     | -0.358    | -0.066    | -0.052    | 0.292  | -0.092    | 0.075  |
| A001086_01 | -0.527    | -0.777    | -0.579    | -0.19     | -0.183    | -0.438 | 0.037     | -0.048 |
| A001087_01 | 0.027     | 0.057     | -0.896    | -1.066    | -0.278    | 0.335  | -0.223    | -0.091 |
| A001088_01 | -0.008    | 0.169     | -0.115    | 0.395     | 0.083     | 0.148  | -0.15     | 0.128  |
| A001089_01 | -0.41 NA  |           | NA        | -0.492 NA |           | NA     | -0.134    | 0.11   |
| A001090_01 | 0.291     | 0.538     | 0.036     | 0.029     | 0.196     | 0.229  | 0.035     | 0.146  |
| A001091_01 | -0.118    | -0.006    | -0.084    | -0.272    | 0.144     | 0.22   | 0.153     | 0.154  |
| A001092_01 | 0.256     | 0.409     | -0.144    | -0.489    | -0.038    | 0.348  | 0.004     | 0.062  |
| A001093_01 | -0.097    | -0.199    | 0.156     | -0.214    | 0.428     | 0.35   | -0.124    | 0.03   |
| A001095_01 | 0.166     | 0.306     | -0.488    | -0.348    | -0.238    | 0.11   | -0.068    | -0.088 |

|            |          |        |        |          |           |        |           |        |
|------------|----------|--------|--------|----------|-----------|--------|-----------|--------|
| A001098_01 | 0.356    | 0.552  | 0.633  | 1.041    | 0.011     | -0.198 | -0.089 NA |        |
| A001099_01 | -1.225   | -1.404 | -0.377 | 0.233 NA |           | -1.955 | -0.365    | -0.141 |
| A001100_01 | 0.074    | 0.542  | 0.483  | 0.12     | 0.168     | 0.273  | 0.168     | 0.435  |
| A001102_01 | -0.394   | -0.289 | 0.019  | 0.244    | -0.319    | -0.42  | -0.163    | 0.089  |
| A001103_01 | -0.729   | -0.776 | -0.348 | -0.388   | -0.452    | -0.558 | -0.13     | 0.051  |
| A001105_01 | 0.492    | 0.493  | 0.107  | -0.039   | 0.25      | 0.597  | 0.449     | 0.331  |
| A001106_01 | 0.099    | 0.098  | 0.168  | 0.505    | 0.061     | 0.419  | 0.278     | 0.116  |
| A001107_01 | 0.284    | 0.295  | 0.163  | 0.055    | 0.21      | 0.558  | 0.378     | 0.449  |
| A001113_01 | -0.468   | -0.573 | -0.88  | 0.15     | -0.305    | -0.311 | -0.42     | -0.224 |
| A001115_01 | -1.552   | -1.962 | -1.229 | -1.185   | -1.709    | -2.42  | -1.034    | -0.875 |
| A001121_01 | 0.574    | 0.562  | 0.358  | 0.446    | 0.348     | 0.487  | 0.257     | 0.094  |
| A001122_01 | -0.501   | -0.108 | -0.36  | 0.001    | -0.133    | 0.07   | -0.194 NA |        |
| A001126_01 | 0.305    | 0.33   | -0.447 | 0.168    | -0.011    | 0.216  | -0.185    | -0.085 |
| A001127_01 | 0.022    | 0.234  | 0.088  | -0.234   | 0.244     | 0.354  | -0.042    | 0.06   |
| A001128_01 | -0.019   | 0.004  | 0.115  | 0.44     | -0.015    | 0.022  | 0.17      | 0.254  |
| A001129_01 | -2.308   | -2.653 | -1.133 | -0.944   | -1.35     | -1.934 | -1.109    | -0.888 |
| A001131_01 | -0.284   | -0.031 | 0.09   | 0.493    | -0.088    | -0.035 | -0.126    | 0.053  |
| A001134_01 | -0.331   | 0.051  | 0.174  | 0.088    | -0.085    | -0.082 | -0.267 NA |        |
| A001135_01 | -0.099   | -0.022 | -0.14  | 0.681    | 0.102     | 0.062  | -0.05     | 0.074  |
| A001136_01 | 0.309    | 0.502  | 0.004  | 0.037    | 0.263     | 0.541  | -0.18     | 0.03   |
| A001137_01 | -0.18 NA |        | -0.414 | 0.136    | -0.281 NA |        | -0.17     | 0.238  |
| A001138_01 | -0.094   | -0.299 | -0.361 | 0.067    | -0.155    | -0.154 | -0.076    | -0.046 |
| A001140_01 | -0.286   | 0.194  | -0.157 | -0.213   | -0.245    | 0.091  | -0.009    | 0.104  |
| A001141_01 | 0.361    | 0.607  | -0.033 | -0.491   | 0.035     | 0.397  | 0.167     | 0.251  |
| A001142_01 | 0.007    | -0.253 | -0.417 | -0.326   | 0.029     | 0.326  | -0.195    | -0.21  |
| A001144_01 | -1.691   | -2.082 | -0.875 | -0.53    | -3.068    | -3.818 | -4.025    | -2.784 |
| A001146_01 | -0.053   | 0.175  | -0.28  | -0.189   | -0.013    | -0.031 | -0.161    | -0.152 |
| A001147_01 | -0.211   | -0.117 | -0.476 | 0.038    | 0.196     | 0.198  | -0.182    | -0.044 |
| A001153_01 | -0.033   | 0.187  | 0.377  | 0.174    | -0.006    | 0.309  | 0.27      | 0.407  |
| A001154_01 | -0.141   | 0.029  | -0.453 | -0.024   | 0.049     | 0.203  | -0.312    | -0.13  |
| A001155_01 | 0.708    | 0.566  | 1.377  | 1.55     | 0.424     | 0.367  | 0.2       | 0.169  |
| A001159_01 | -0.33    | -0.006 | -0.026 | 0.516    | -0.589    | -0.341 | 0.109     | 0.436  |
| A001163_01 | 0.508    | 0.308  | 0.278  | 0.581    | 0.621     | 0.672  | -0.099    | -0.098 |
| A001165_01 | 0.165    | 0.503  | 0.436  | 0.783    | 0.03      | 0.167  | -0.135    | 0.151  |
| A001166_01 | -0.57    | -0.472 | 0.318  | 0.321    | -0.531    | -0.524 | 0.072     | 0.147  |
| A001169_01 | -0.387   | -0.436 | -0.653 | -0.13    | 0.04      | 0.05   | -0.065 NA |        |
| A001180_01 | -0.08    | 0.223  | 0.159  | -0.456   | 0.074     | 0.188  | 0.038     | 0.083  |
| A001181_01 | -0.077   | 0.048  | 0.04   | 0.082    | -0.14     | -0.252 | -0.313 NA |        |
| A001184_01 | 0.312    | 0.206  | -0.095 | -0.128   | -0.104    | 0.064  | -0.234    | -0.088 |
| A001186_01 | 0.273    | 0.298  | -0.061 | 0.349    | 0.189     | 0.289  | 0.177     | 0.315  |
| A001187_01 | 0.57     | 0.801  | 0.39   | -0.011   | -0.024    | 0.451  | 0.119     | 0.459  |
| A001188_01 | -0.697   | -0.701 | -0.764 | -0.895   | -0.28     | -0.343 | -0.226    | -0.087 |
| A001189_01 | 0.463    | 0.323  | 0.478  | -0.22    | 0.362     | 0.456  | 0.434     | 0.435  |
| A001190_01 | 0.349    | 0.423  | -0.004 | 0.208    | 0.033     | 0.09   | -0.124    | 0.066  |
| A001197_01 | 0.427    | 0.713  | -0.073 | -0.762   | 0.193     | 0.646  | 0.083     | 0.135  |
| A001199_01 | -0.572   | -0.503 | 0.056  | 0.035    | -0.102    | -0.003 | 0.09      | 0.167  |
| A001207_01 | -0.079   | -0.009 | -0.15  | 0.022    | -0.082    | 0.094  | -0.013    | 0.023  |
| A001209_01 | -0.028   | 0.086  | -0.339 | -0.42    | -0.297    | -0.036 | 0.647     | 0.61   |
| A001210_01 | 0.267    | 0.582  | 0.02   | 0.385    | 0.05      | 0.282  | 0.003     | 0.211  |
| A001211_01 | -0.328   | -0.085 | -0.206 | -0.108   | 0         | -0.03  | -0.253 NA |        |
| A001212_01 | 0.901    | 0.959  | 0.022  | 0.487    | 0.126     | 0.587  | -0.134    | 0.041  |
| A001215_01 | 0.544    | 0.575  | 0.123  | -0.415   | -0.232    | -0.103 | 0.231     | 0.15   |
| A001216_01 | -1.523   | -1.522 | -1.373 | -1.152   | -0.401    | -0.351 | -1.079    | -0.809 |
| A001217_01 | -0.182   | -0.391 | 0.023  | 0.168    | -0.4      | -0.206 | -0.379    | -0.152 |
| A001218_01 | -0.59    | -0.407 | -0.278 | -0.085   | -0.105    | -0.086 | -0.32     | -0.069 |
| A001219_01 | -0.632   | -0.298 | -0.76  | 0.007    | -0.204    | 0.057  | -0.222    | 0.126  |
| A001222_01 | -0.114   | 0.005  | 0.258  | 0.408    | -0.025    | -0.093 | 0.352     | 0.454  |
| A001223_01 | 0.609    | 0.953  | 0.112  | 0.415    | -0.146    | 0.263  | -0.195    | 0.042  |
| A001227_01 | -0.533   | -0.195 | -0.297 | -0.443   | -0.015    | 0.261  | 0.309     | 0.328  |
| A001229_01 | 0.377    | 0.402  | 0.469  | 0.588    | 0.16      | 0.046  | 0.43      | 0.316  |
| A001230_01 | -0.199   | 0.134  | 0.082  | 0.391    | -0.197    | -0.283 | -0.567    | -0.062 |
| A001231_01 | -0.355   | -0.102 | -0.264 | 0.252    | -0.354    | -0.283 | -0.253    | 0.098  |
| A001232_01 | -0.257   | -0.037 | -0.406 | 0.331    | -0.353 NA |        | -0.043    | 0.177  |
| A001234_01 | 0.137    | 0.116  | -0.241 | 0.179    | -0.291    | -0.119 | -0.147    | -0.086 |
| A001235_01 | 0.299    | 0.549  | 0.41   | 0.159    | 0.34      | 0.382  | 0.417     | 0.305  |
| A001237_01 | -0.304   | -0.329 | 0.072  | 0.105    | -0.044    | -0.064 | -0.044    | 0.085  |
| A001240_01 | -0.056   | 0.372  | 0.461  | 0.464    | 0.13      | 0.325  | -0.114 NA |        |
| A001241_01 | 0.051    | 0.226  | 0.176  | 0.175    | -0.116    | -0.018 | 0.016     | -0.035 |

|            |          |          |          |          |           |        |           |        |
|------------|----------|----------|----------|----------|-----------|--------|-----------|--------|
| A001242_01 | -2.9     | -2.926   | -1.114   | -0.255   | -3.944    | -4.401 | -2.753    | -2.243 |
| A001244_01 | 0.046    | 0.023    | 0.212    | -0.069   | 0.272     | 0.275  | 0.02      | -0.048 |
| A001245_01 | 0.015    | 0.118    | -0.162   | -0.34    | 0.039 NA  |        | -0.246 NA |        |
| A001246_01 | 0.156    | 0.098    | -0.045   | -0.216   | 0.192     | -0.053 | -0.085    | 0.186  |
| A001247_01 | 0.499    | 0.736    | 0.697    | 0.653    | 0.41      | 0.804  | 0.206     | 0.489  |
| A001248_01 | -0.133   | -0.512   | -0.474   | -0.719   | -0.403    | -0.553 | -0.11     | -0.118 |
| A001250_01 | 0.602    | 0.983    | 0.854    | 0.698    | 0.336     | 0.371  | 0.032     | 0.405  |
| A001251_01 | -0.634   | -0.509   | 0.008    | 0.083    | -0.139    | -0.239 | -0.044    | 0.146  |
| A001254_01 | 0.545    | 0.522    | 0.22     | 0.88     | 0.519     | 0.553  | 0         | 0.201  |
| A001255_01 | 0.028    | 0.204    | -0.054   | 0.166    | -0.202    | -0.017 | -0.131    | 0.15   |
| A001257_01 | -0.461   | -0.232   | -0.19    | 0.154    | -0.152    | -0.099 | 0.036 NA  |        |
| A001260_01 | 0.126    | 0.297    | 0.228    | 0.408    | -0.111 NA |        | 0.208     | 0.243  |
| A001261_01 | -0.791   | -1.057   | -0.927   | -1.234   | -0.542    | -0.672 | -0.795    | -0.571 |
| A001263_01 | -0.194   | -0.006   | 0.391 NA |          | -0.67     | -0.591 | -0.596 NA |        |
| A001273_01 | -0.268   | -0.204   | -0.339   | -0.293   | -0.077    | -0.194 | -0.115    | 0.094  |
| A001281_01 | 0.202    | 0.105    | -0.46    | -0.281   | 0.151     | 0.122  | -0.404    | -0.193 |
| A001283_01 | -0.12    | -0.39    | 0.005    | 0.225    | 0.103     | 0.032  | -0.035    | 0.092  |
| A001284_01 | -0.201   | -0.284   | -0.125   | -0.395   | 0.121     | 0.16   | 0.008     | 0.065  |
| A001285_01 | -0.225   | -0.341   | -0.017   | -0.315   | 0.04      | 0.057  | 0.139     | 0.11   |
| A001289_01 | -0.061   | 0.062    | -0.151   | 0.083    | -0.459    | -0.458 | -0.227    | 0.104  |
| A001291_01 | 0.429    | 0.37     | 0.226    | 0.282    | -0.72 NA  |        | -0.389    | -0.038 |
| A001293_01 | 0.003    | -0.198   | -0.181   | 0.342    | 0         | -0.213 | 0.012     | -0.098 |
| A001296_01 | 0.091    | 0.351    | 0.328    | -0.002   | 0.337     | 0.351  | 0.109     | 0.232  |
| A001297_01 | -0.118   | -0.211   | -0.003   | -0.188   | 0.109     | -0.012 | 0.197     | 0.096  |
| A001298_01 | -0.29    | -0.379   | 0.17     | 0.018    | -0.376    | -0.648 | 0.258     | 0.188  |
| A001299_01 | -1.177   | -1.693   | -1.233   | -1.091   | -0.465    | -0.786 | -0.723    | -0.589 |
| A001302_01 | -0.831   | -0.754   | 0.358    | 0.568    | -0.786    | -0.98  | 0.196     | 0.222  |
| A001303_01 | 0.194    | -0.03    | 0.151    | 0.177    | 0.363     | 0.365  | 0.041     | 0.061  |
| A001306_01 | -0.566   | -0.212   | -0.137   | -0.104   | -0.151    | -0.048 | -0.143 NA |        |
| A001308_01 | -0.374   | -0.376   | -0.155   | 0.055    | 0.049     | 0.138  | -0.215    | -0.089 |
| A001309_01 | -0.526   | -0.375   | -0.308   | -0.052   | -0.137    | -0.17  | -0.051    | 0.053  |
| A001311_01 | 0.335    | -0.005   | -0.035   | -0.202   | 0.039     | 0.034  | 0.063     | 0.125  |
| A001317_01 | -0.064   | 0.01     | 0.184    | 0.194    | 0.127     | 0.054  | -0.025 NA |        |
| A001318_01 | -0.929   | -0.757   | -0.624   | -0.313   | -0.418    | -0.449 | 0.335     | 0.42   |
| A001324_01 | -0.121   | 0.119    | -0.017   | -0.316   | 0.27      | 0.26   | -0.173 NA |        |
| A001325_01 | -0.294   | -0.12    | 0.215    | 0.213    | 0.126     | -0.007 | 0.046     | 0.122  |
| A001326_01 | 0.312    | 0.501    | 0.248    | 0.238    | 0.218     | 0.24   | 0.19      | 0.205  |
| A001329_01 | 0.342    | -0.1     | -0.016   | -0.219   | 0.281     | 0.227  | 0.296     | 0.194  |
| A001331_01 | 0.049    | 0.381    | 0.088    | -0.205   | 0.231     | 0.434  | -0.099    | 0.006  |
| A001332_01 | 0.027    | 0.142    | -0.273   | 0.063    | -0.199    | -0.163 | -0.258    | -0.325 |
| A001333_01 | -0.404   | -0.396   | -0.446   | -0.053   | -0.219    | -0.199 | -0.159    | -0.02  |
| A001334_01 | 0.211    | 0.235    | 0.175    | -0.095   | 0.202     | 0.329  | 0.198     | 0.086  |
| A001339_01 | -0.238   | -0.303   | -0.805   | -0.771   | -0.027    | 0.028  | -0.517    | -0.452 |
| A001340_01 | 0.347    | 0.641    | -0.443   | 0.025    | -0.326    | 0.167  | -0.159    | -0.026 |
| A001345_01 | 0.217    | -0.005   | 0.265    | -0.189   | 0.011     | -0.111 | 0.047     | -0.046 |
| A001347_01 | 0.146    | 0.459    | 0.289    | 0.139    | 0.23      | 0.261  | -0.04 NA  |        |
| A001348_01 | 0.104    | -0.133   | -0.215   | -0.052   | 0.072     | 0.018  | -0.023    | -0.027 |
| A001350_01 | -0.147   | -0.142   | -0.384   | -0.14    | -0.012    | 0.094  | 0.308     | 0.36   |
| A001351_01 | -0.12    | -0.239   | -0.316   | 0.604    | -0.242    | -0.255 | -0.373    | -0.26  |
| A001352_01 | -0.293   | 0.388 NA |          | NA       | -0.414    | -0.052 | -0.312 NA |        |
| A001353_01 | -0.177   | -0.202   | -0.098   | 0.066    | -0.142    | -0.062 | -0.122 NA |        |
| A001355_01 | 0.037    | -0.222   | -0.689   | -0.332   | -2.033    | -2.624 | -2.375    | -1.659 |
| A001356_01 | 0.405    | 0.385    | -0.167   | 0.12     | 0.058     | 0.137  | -0.147    | -0.176 |
| A001357_01 | 0.356    | 0.449    | 0.731    | 1.023    | 0.375     | 0.334  | -0.392    | -0.29  |
| A001358_01 | 0.132    | 0.113    | 0.123    | -0.069   | -0.219 NA |        | 0.269     | 0.137  |
| A001360_01 | 0.173    | 0.194    | 0.134    | 0.264    | -0.213    | -0.118 | -0.357    | -0.101 |
| A001363_01 | 0.082    | 0.217    | -0.546   | 0.028    | 0.062     | 0.114  | -0.247    | -0.153 |
| A001369_01 | -0.943   | -1.011   | -1.081   | -0.213   | -1.046    | -1.294 | -0.915    | -0.551 |
| A001374_01 | 0.73     | 0.599    | -0.281   | 0.2      | -1.593    | -2.271 | -1.827    | -1.564 |
| A001375_01 | -0.155   | -0.091   | -0.847   | -0.516   | -0.176    | 0.014  | -0.469    | -0.366 |
| A001376_01 | 0.623    | 0.613    | 0.292    | -0.259   | 0.336     | 0.52   | 0.089     | 0.066  |
| A001378_01 | 0.114    | 0.282    | -0.172   | 0.409    | 0.062     | 0.249  | 0.232     | 0.237  |
| A001380_01 | 0.196    | 0.121    | 0.421    | 0.498    | 0.252     | -0.029 | 0.287     | 0.267  |
| A001387_01 | 0.162 NA |          | 0.267    | 0.188    | -0.393 NA |        | 0.063     | 0.112  |
| A001389_01 | -0.516   | -0.597   | -0.13    | -0.052   | -0.039    | -0.273 | -0.028    | -0.152 |
| A001390_01 | 0.129    | 0.103    | 0.088    | 0.122    | 0.09      | -0.067 | -0.178    | -0.183 |
| A001392_01 | -0.519   | -0.523   | 0.086    | -0.354   | -0.542    | -0.371 | -0.168    | 0.064  |
| A001396_01 | 0.344    | 0.212    | -0.246   | -0.18 NA |           | NA     | 0.332     | 0.226  |

|            |           |          |          |           |           |        |           |        |
|------------|-----------|----------|----------|-----------|-----------|--------|-----------|--------|
| A001399_01 | 0.216     | 0.162    | 0.118    | -0.058    | 0.21      | 0.086  | 0.2       | 0.078  |
| A001400_01 | 0.134     | -0.044   | -0.183   | -0.041    | 0.089     | 0.026  | -0.095    | -0.151 |
| A001401_01 | 0.425     | 0.395    | 0.088    | -0.044 NA |           | 0.202  | -0.099    | 0.059  |
| A001409_01 | 0.155     | 0.379    | 0.152    | 0.491     | 0.338     | 0.364  | 0.271     | 0.359  |
| A001410_01 | -0.46 NA  |          | -0.083   | 0.32      | -0.346    | 0.405  | 0.222     | 0.41   |
| A001411_01 | 0.391     | 0.407    | 0.308    | 0.489     | 0.046     | 0.15   | 0.362     | 0.369  |
| A001412_01 | 0.15      | 0.025    | 0.127    | -0.279    | -0.177    | -0.29  | 0.102     | -0.184 |
| A001417_01 | -0.03     | 0.374    | 0.116 NA |           | -0.022    | 0.235  | 0.028 NA  |        |
| A001418_01 | 0.772     | 0.811    | 0.36     | 0.56      | 0.162     | 0.344  | 0.275     | 0.135  |
| A001420_01 | 0.445     | 0.506    | 0.098    | 0.341     | -0.304    | -0.371 | -0.436    | 0.018  |
| A001421_01 | 0.414     | 0.349    | -0.065   | -0.463    | -0.051    | 0.439  | 0.125     | 0.336  |
| A001426_01 | 0.585     | 0.531    | 0.123    | -0.907    | 0.052     | 0.259  | 0.201     | 0.086  |
| A001428_01 | -0.145    | -0.347   | -0.36    | -0.314    | -0.068    | -0.207 | 0.148     | 0.069  |
| A001429_01 | 0.433     | 0.476    | 0.64     | 0.856     | -0.314    | -0.445 | -0.063    | 0.092  |
| A001432_01 | 0.744     | 0.832    | 0.395    | 0.22      | -0.139    | 0.181  | 0.347     | 0.381  |
| A001435_01 | -0.262    | -0.553   | -0.814   | -0.854    | -0.341    | -0.541 | -0.953    | -0.716 |
| A001436_01 | 0.034     | 0.188    | 0.627    | 0.241     | 0.204     | 0.073  | 0.575     | 0.528  |
| A001441_01 | -0.595    | -0.753   | 0.063    | -0.692    | -0.069    | -0.139 | 0.215     | 0.121  |
| A001442_01 | 0.416     | 0.091    | 0.1      | -0.173    | -0.028    | 0.092  | 0.171     | -0.004 |
| A001445_01 | 0.009     | 0.062    | 0.086    | 0.534     | 0.053     | 0.117  | 0.075     | 0.041  |
| A001446_01 | -0.047    | -0.057   | 0.229    | 0.26      | 0.025     | -0.16  | 0.009     | 0.016  |
| A001448_01 | -0.162    | -0.053   | -0.157   | 0.355     | 0.054     | -0.038 | -0.02     | -0.008 |
| A001449_01 | 0.367     | 0.764    | -0.048   | -0.035    | -0.079    | 0.442  | 0.027     | 0.153  |
| A001451_01 | 0.335     | 0.297    | 0.918    | 0.685     | 0.208     | 0.394  | 0.322     | 0.474  |
| A001452_01 | 0.258     | 0.438    | -0.036   | 0.189     | -0.263    | 0.167  | 0.091     | 0.278  |
| A001455_01 | 0.586     | 0.78     | -0.035   | 0.366     | -0.074    | 0.071  | -0.239    | -0.067 |
| A001457_01 | 0.204     | 0.346    | 0.291    | 0.094     | -0.004    | -0.049 | 0.197     | 0.052  |
| A001458_01 | 0.014     | 0.401    | 0.217    | -0.103    | 0.108     | 0.027  | -0.049    | 0.09   |
| A001460_01 | 0.431     | 0.898    | 0.178    | 0.259     | 0.095     | 0.539  | -0.221    | 0.241  |
| A001461_01 | 0.62      | 0.777    | 0.098    | -0.336    | 0.089     | 0.391  | -0.023    | 0.107  |
| A001465_01 | 0.058     | 0.023    | -0.258   | -0.027    | 0.019     | 0.008  | 0.059     | -0.07  |
| A001468_01 | 0.636     | 0.452    | 0.053    | 0.14      | 0.258     | 0.502  | 0.171     | 0.174  |
| A001471_01 | -0.554    | -0.566   | -0.115   | 0.487     | -1.086    | -1.523 | -0.575    | -0.327 |
| A001472_01 | -0.453    | -0.528   | -0.736   | -0.501    | -0.05     | -0.045 | -0.152    | -0.143 |
| A001474_01 | -0.07     | 0.045    | -0.165   | -0.02     | 0.096     | 0.116  | 0.011     | 0.192  |
| A001477_01 | -1.27     | -1.147   | -0.553   | -0.564    | -0.357    | -0.413 | 0.147     | 0.299  |
| A001480_01 | -0.373    | 0.397    | 0.075    | 0.449     | -0.216    | 0.206  | -0.121    | 0.233  |
| A001481_01 | -0.821    | -0.485   | -0.57    | -0.306    | -0.211    | 0.138  | -0.214    | -0.018 |
| A001487_01 | 0.06      | 0.084    | 0.225    | -0.419    | 0.01      | 0.005  | 0.055     | 0.065  |
| A001488_01 | 0.251     | 0.273    | -0.391   | -0.673    | 0.13      | 0.187  | -0.04     | -0.145 |
| A001490_01 | 0.385     | 0.458    | 0.081    | -0.395    | 0.154     | 0.263  | 0.164     | 0.314  |
| A001495_01 | 0.504     | 0.57     | -0.151   | 0.158     | 0.147     | 0.31   | -0.075    | -0.048 |
| A001496_01 | -0.127    | 0.036    | -0.128   | 0.724     | 0.109     | 0.162  | -0.074 NA |        |
| A001507_01 | -0.439    | -0.568   | -0.153   | 0.096     | -0.345    | -0.517 | -0.024    | -0.081 |
| A001511_01 | -0.465    | -0.07    | -0.098   | -0.207    | -0.192    | -0.179 | -0.292    | -0.136 |
| A001513_01 | 0.391     | 0.794    | 0.163    | -0.517    | 0.214     | 0.23   | 0.002     | 0.182  |
| A001516_01 | -0.155    | -0.027   | -0.255   | 0.229     | -0.577    | 0.093  | -0.268    | 0.055  |
| A001518_01 | 0.165     | 0.249    | 0.276    | 1.117     | -0.578    | -0.96  | -0.36     | -0.062 |
| A001529_01 | 0.214     | 0.429    | 0.144    | -0.067    | -0.049 NA |        | 0.099     | 0.406  |
| A001536_01 | 0.394     | 0.505    | -0.012   | -0.056    | 0.071     | 0.149  | -0.048    | 0.038  |
| A001537_01 | 0.788     | 1.001    | 0.034    | -0.128    | -0.158    | 0.391  | 0.127     | -0.056 |
| A001553_01 | 0.518     | 0.556    | -0.026   | -0.24     | -0.032    | 0.364  | -0.052    | -0.004 |
| A001558_01 | 0.04      | -0.199   | -0.377   | 0.067     | 0.042     | -0.181 | -0.084    | -0.113 |
| A001559_01 | -0.032 NA |          | -0.213   | 0.204     | -0.227 NA |        | 0.267     | 0.251  |
| A001566_01 | 0.421     | 0.614    | -0.229   | 0.169     | -0.111    | -0.094 | -0.235    | 0.072  |
| A001567_01 | 0.624     | 0.423    | -0.102   | -0.259    | 0.406     | 0.613  | -0.127    | -0.237 |
| A001568_01 | -0.005    | 0.092 NA |          | NA        | -0.109    | 0.02   | -0.559 NA |        |
| A001573_01 | -0.245    | -0.032   | -0.026   | 0.455     | -0.047    | -0.132 | -0.23 NA  |        |
| A001578_01 | -0.477    | -0.6     | -0.023   | -0.005    | -0.316    | -0.439 | -0.218    | -0.039 |
| A001586_01 | -0.223    | 0.048    | -0.413   | 0.731     | -0.104    | 0.112  | 0.054     | 0.391  |
| A001593_01 | 0.454     | 0.787    | 0.652    | 0.323     | 0.059     | 0.462  | 0.42      | 0.788  |
| A001595_01 | -0.301    | -0.281   | -0.014   | 0.158     | -0.242    | -0.296 | 0.01      | 0.192  |
| A001601_01 | 0.005     | 0.235 NA |          | NA        | -0.194    | 0.139  | -0.221 NA |        |
| A001602_01 | -0.04     | 0.168    | 0.041    | 0.131     | -0.116    | -0.082 | -0.227 NA |        |
| A001604_01 | 0.311     | 0.495    | 0.418    | 0.192     | 0.09      | 0.153  | 0.174     | 0.199  |
| A001605_01 | -0.183    | -0.041   | 0.203    | -0.124    | -0.163    | -0.051 | 0.035     | 0.118  |
| A001606_01 | 0.126     | 0.231    | 0.361    | -0.102    | -0.035    | 0.282  | 0.289     | 0.37   |
| A001609_01 | -0.671    | -0.622   | -0.281   | -0.387    | -0.319    | -0.232 | -0.037    | -0.066 |

|            |           |           |        |          |           |        |           |        |
|------------|-----------|-----------|--------|----------|-----------|--------|-----------|--------|
| A001610_01 | 0.193     | 0.244     | -0.016 | -0.541   | 0.2       | 0.379  | -0.087    | -0.029 |
| A001611_01 | 0.095     | 0.553     | -0.137 | -0.185   | -0.006 NA |        | -0.126    | 0.097  |
| A001612_01 | -1.203    | -1.111 NA |        | -1.781   | -0.809    | -1.109 | -2.062    | -1.321 |
| A001613_01 | 0.032     | 0.085     | 0.334  | 0.304    | -0.193    | -0.132 | -0.085    | -0.021 |
| A001619_01 | 0.594     | 0.788     | 0.879  | 0.633    | 0.243     | 0.405  | 0.334     | 0.32   |
| A001621_01 | -0.074    | 0.199 NA  |        | 0.364 NA | NA        |        | -0.502 NA |        |
| A001624_01 | -0.106    | 0.174 NA  |        | 0.092    | -0.146    | 0.284  | -0.543 NA |        |
| A001631_01 | 0.662     | 0.56      | 1.959  | 2.013    | 1.147     | 1.049  | 0.371     | 0.402  |
| A001645_01 | 0.035     | 0.221     | 0.381  | 0.126    | -0.129    | -0.126 | 0.02      | 0.148  |
| A001651_01 | 0.023     | 0.088     | -0.401 | 0.253    | -0.079    | -0.2   | -0.496    | -0.169 |
| A001652_01 | 0.146     | 0.369     | -0.267 | 0.012    | 0.175     | 0.483  | 0.115     | 0.304  |
| A001663_01 | -0.586    | -0.094    | -0.14  | 0.214    | 0.048     | 0.348  | 0.377     | 0.514  |
| A001664_01 | -0.631 NA |           | -0.107 | 0.655    | -0.199 NA |        | 0.343     | 0.516  |
| A001670_01 | 0.034     | 0.469 NA  | NA     |          | -0.374    | -0.055 | -0.288    | 0.279  |
| A001671_01 | -0.482    | -0.451    | 0.226  | -0.025   | -0.067    | 0.031  | -0.049    | 0.188  |
| A001675_01 | -0.301    | -0.298    | 0.197  | 0.475    | -0.276    | -0.299 | 0.071     | 0.039  |
| A001677_01 | -0.001    | 0.285     | 0.047  | 0.335    | -0.145    | 0.194  | -0.182    | 0.144  |
| A001678_01 | 0.152     | 0.222     | -0.221 | 0.426    | 0.007     | 0.384  | -0.142    | 0.14   |
| A001679_01 | 0.506     | 0.099     | 0.731  | 1.12 NA  |           | -0.414 | 0.141     | 0.091  |
| A001681_01 | 0.039     | 0.042     | 0.018  | -0.002   | 0.044     | -0.134 | -0.225    | -0.113 |
| A001683_01 | 0.097     | 0.37      | -0.051 | 0.384    | 0.003     | 0.118  | -0.157    | 0.013  |
| A001693_01 | 0.528     | 0.54      | 0.202  | -0.15    | -0.058    | 0.27   | -0.03     | 0.174  |
| A001695_01 | 0.037     | 0.486     | -0.197 | -0.079   | -0.143    | 0.13   | -0.132    | -0.005 |
| A001696_01 | -0.23 NA  |           | -1.083 | 0.244    | -0.301    | 0.073  | -0.501 NA |        |
| A001697_01 | -0.995    | -0.915    | -0.689 | -0.435   | -0.553    | -0.583 | -0.334 NA |        |
| A001711_01 | -0.244    | -0.092    | -0.035 | 0.208    | 0.102     | -0.058 | -0.161    | 0.068  |
| A001717_01 | 0.117     | 0.14      | 0.194  | 0.536    | 0.183     | 0.132  | -0.263    | -0.097 |
| A001719_01 | -0.334    | -0.306    | -0.184 | 0.092    | -0.439    | -0.323 | -0.07     | 0.01   |
| A001720_01 | -0.014    | -0.129    | -1.499 | -0.592   | -2.545    | -3.154 | -2.836 NA |        |
| A001728_01 | -0.034    | -0.007    | -0.039 | -0.043   | -0.107    | -0.168 | 0.005     | 0.161  |
| A001736_01 | -0.086    | -0.23     | -0.327 | 0.072    | 0.205     | 0.221  | 0.197     | 0.242  |
| A001740_01 | -0.194    | -0.026    | 0.092  | 0.188    | -0.138    | -0.058 | 0.035     | 0.086  |
| A001745_01 | 0.097     | 0.107     | -0.461 | 0.773    | -0.397    | -0.436 | -0.733 NA |        |
| A001748_01 | 0.277     | 0.452     | -0.424 | -0.015   | -0.081    | 0.621  | -0.239    | 0.315  |
| A001750_01 | -0.454    | -0.359    | -0.418 | 0.065    | -0.026    | -0.032 | -0.37     | -0.059 |
| A001756_01 | -0.326    | -0.064    | -0.159 | 0.45     | -0.003    | 0.029  | -0.135    | 0.338  |
| A001757_01 | -0.319    | -0.188    | -0.041 | 0.318    | 0.009     | 0.08   | 0.029     | 0.141  |
| A001758_01 | 0.22      | 0.343     | 0.095  | 0.534    | -0.403 NA |        | -0.202    | 0.02   |
| A001760_01 | 0.096     | 0.332     | -0.683 | 0.115    | -0.181    | -0.127 | -0.352    | -0.109 |
| A001770_01 | -0.967    | -0.937    | -0.489 | -0.314   | -0.369    | -0.182 | -0.269    | 0.197  |
| A001773_01 | -0.37     | -0.358    | -0.158 | -0.455   | 0.405     | 0.328  | -0.017    | -0.145 |
| A001779_01 | 0.092     | 0.16      | -0.358 | 0.465    | -0.071    | -0.18  | -0.498    | -0.046 |
| A001783_01 | 0.068     | 0.517     | -0.117 | 0.095    | -0.093 NA |        | 0.015     | 0.103  |
| A001785_01 | -0.449 NA |           | -0.408 | -0.262   | -0.164    | 0.011  | -0.34 NA  |        |
| A001789_01 | -1.639    | -1.386    | -0.823 | -0.496   | -0.526    | -0.3   | -0.203    | 0.023  |
| A001790_01 | -1.462    | -1.302    | -0.57  | -0.664   | -0.611    | -0.37  | -0.154    | 0.008  |
| A001791_01 | 0.453     | 0.58      | 0.281  | 0.159    | 0.021     | 0.287  | -0.073    | 0.129  |
| A001800_01 | -0.512 NA |           | -0.985 | -0.707   | -0.451 NA |        | -1.305 NA |        |
| A001801_01 | 0.028     | -0.032    | -0.154 | -0.191   | -0.301    | -0.246 | -0.264    | -0.019 |
| A001803_01 | 0.153     | 0.283     | 0.387  | 0.236    | -0.171    | 0.038  | -0.197    | -0.024 |
| A001804_01 | -0.05     | 0.016     | 0.104  | -0.049   | -0.072    | -0.171 | -0.082    | -0.033 |
| A001807_01 | -0.49 NA  |           | -0.229 | -0.109   | -0.319 NA |        | -0.223    | -0.027 |
| A001819_01 | -0.426    | -0.248 NA |        | 0.347    | -0.34     | -0.433 | -0.254    | 0.058  |
| A001826_01 | -0.042    | -0.24     | -0.284 | 0.054    | 0.102     | -0.222 | -0.235    | -0.295 |
| A001827_01 | -0.147    | 0.252     | 0.068  | -0.185   | 0.124     | 0.626  | 0.104     | 0.274  |
| A001833_01 | -0.123    | 0.089     | -0.058 | 0.083    | -0.228    | 0.136  | -0.12     | 0.063  |
| A001838_01 | 0.151     | 0.233     | 0.08   | 0.026    | -0.081    | -0.223 | -0.259    | 0.065  |
| A001842_01 | 0.874     | 0.891     | -0.071 | 0.746    | 0.21      | 0.4    | -0.699    | -0.229 |
| A001843_01 | -0.173    | -0.298    | -0.097 | -0.103   | -0.234    | -0.501 | -0.416    | -0.331 |
| A001848_01 | 0.174     | 0.224     | 0.072  | 0.316    | -0.04     | 0.07   | -0.188    | 0.145  |
| A001861_01 | -0.046    | -0.031    | -0.316 | -0.204   | 0.186     | 0.46   | 0.047     | -0.032 |
| A001864_01 | 0.118     | 0.168     | -0.128 | -0.412   | 0.219     | 0.166  | 0.018     | 0.137  |
| A001865_01 | -0.274    | -0.222    | -0.293 | 0.491    | -0.071 NA |        | -0.081 NA |        |
| A001867_01 | -0.021    | 0.367     | 0.237  | 0.32     | 0.091     | 0.24   | -0.014    | 0.236  |
| A001868_01 | -0.252    | 0.283     | -0.471 | 0.32     | -0.179    | 0.136  | -0.237    | 0.291  |
| A001869_01 | 0.134     | 0.02      | -0.48  | -0.204   | -0.184    | -0.078 | -0.298    | -0.054 |
| A001870_01 | 0.117     | 0.447 NA  |        | 0.441    | 0.103 NA  |        | -0.291 NA |        |
| A001874_01 | 0.624     | 0.54      | 0.364  | 0.263    | 0.132     | 0.581  | -0.1      | 0.121  |

|            |           |           |        |        |           |        |           |        |
|------------|-----------|-----------|--------|--------|-----------|--------|-----------|--------|
| A001880_01 | -0.327 NA |           | -0.562 | 0.208  | 0.007     | 0.265  | 0.05      | 0.176  |
| A001883_01 | 0.319     | 0.39      | 0.065  | 0.334  | -0.013    | 0.026  | -0.154    | -0.182 |
| A001884_01 | 0.28      | 0.363     | 0.273  | 0.45   | -0.07     | -0.004 | -0.104    | -0.142 |
| A001886_01 | -0.634    | -0.344    | -0.172 | -0.101 | -0.57     | -0.669 | -0.056    | 0.011  |
| A001889_01 | -0.237    | -0.066    | -0.322 | -0.051 | -0.284    | -0.25  | -0.247    | 0.132  |
| A001894_01 | 0.754     | 0.627     | -0.254 | -0.051 | 0.062     | 0.353  | -0.31 NA  |        |
| A001898_01 | 0.881     | 0.788     | 0.014  | -0.21  | -0.078    | 0.372  | 0.041     | 0.01   |
| A001901_01 | -0.42     | -0.36     | -0.2   | 0.004  | -0.157    | -0.111 | -0.096    | 0.002  |
| A001903_01 | 0.215     | 0.053     | -0.338 | 0.242  | 0.13 NA   |        | 0.459     | 0.301  |
| A001904_01 | -0.154    | -0.193    | 0.007  | 0.69   | 0.122     | -0.253 | -0.059    | -0.191 |
| A001912_01 | -0.624 NA |           | -0.722 | -0.644 | -0.001 NA |        | -0.017    | -0.006 |
| A001913_01 | -0.019    | -0.107    | -1.209 | -1.736 | -0.246    | -0.122 | -0.831    | -0.617 |
| A001915_01 | 0.182     | 0.121     | -0.335 | 0      | 0.247     | 0.16   | -0.102    | 0.046  |
| A001917_01 | -0.741    | -0.701    | -0.122 | -0.214 | -0.103    | -0.136 | -0.058    | -0.019 |
| A001918_01 | 0.266     | 0.426     | 0.472  | -0.167 | 0.414     | 0.603  | 0.134     | 0.213  |
| A001920_01 | -0.242    | -0.389    | -0.022 | 0.148  | 0.043     | -0.143 | 0.189     | 0.078  |
| A001924_01 | -0.299    | -0.098    | -0.031 | -0.201 | 0.154     | -0.122 | -0.039    | 0.045  |
| A001929_01 | 0.51      | 0.601     | -0.165 | -0.76  | 0.242 NA  |        | 0.023     | -0.021 |
| A001932_01 | -0.438    | -0.469 NA |        | NA     | 0.009 NA  |        | 0.055 NA  |        |
| A001934_01 | -0.145    | -0.142    | 0.347  | -0.031 | 0.439     | 0.563  | -0.029    | 0.02   |
| A001936_01 | 0.398     | 0.398     | 0      | 0.436  | -0.413    | -0.444 | -0.089    | -0.086 |
| A001937_01 | 0.433     | 0.305     | -0.141 | 0.375  | -0.451    | -0.731 | -0.845    | -0.718 |
| A001939_01 | -0.272    | -0.384    | -0.4   | 0.226  | -0.466    | -0.195 | 0.148     | 0.281  |
| A001945_01 | -0.072    | 0.038     | -0.025 | 0.318  | 0.085     | 0.186  | 0.049     | -0.051 |
| A001946_01 | 0.264     | 0.232     | 0.215  | -0.045 | 0.3       | 0.406  | -0.02     | -0.017 |
| A001952_01 | 0.02      | -0.157    | 0.174  | 0.055  | 0.135     | -0.165 | 0.129     | 0.012  |
| A001957_01 | -0.304 NA |           | 0.272  | -0.796 | 0.066 NA  |        | 0.847     | 0.744  |
| A001958_01 | -0.157    | -0.166    | -0.069 | -0.384 | 0.465     | -0.155 | 0.417 NA  |        |
| A001959_01 | 0.534     | 0.477     | 0.152  | 0.197  | 0.323     | 0.324  | 0.143     | -0.002 |
| A001961_01 | 0.093     | 0.191     | -0.338 | -0.609 | 0.22 NA   |        | 0.39      | 0.308  |
| A001962_01 | -0.317    | -0.306    | -0.021 | 0.277  | 0.109     | -0.102 | -0.125    | -0.14  |
| A001963_01 | -0.367    | -0.249    | -0.05  | 0.101  | -0.091    | -0.174 | -0.139    | -0.123 |
| A001964_01 | -0.458    | -0.296    | -0.214 | -0.173 | -0.196    | -0.31  | -0.047    | 0.191  |
| A001966_01 | -0.134    | -0.197    | -0.298 | 0.156  | 0.028     | -0.033 | 0.064     | -0.057 |
| A001967_01 | 0.154     | 0.164     | 0.263  | 0.082  | -0.14     | 0.144  | 0.536     | 0.49   |
| A001970_01 | 0.436     | 0.32      | 0.325  | -0.034 | -0.025    | 0.246  | -0.004    | -0.027 |
| A001974_01 | -0.391    | -0.303    | -0.108 | 0.099  | -0.049    | -0.223 | -0.066    | -0.009 |
| A001975_01 | -0.047    | 0.425     | 0.062  | -0.194 | 0.244     | 0.151  | 0.028     | 0.071  |
| A001979_01 | -0.644    | -0.159    | 0.215  | 0.075  | -0.068    | -0.083 | -0.034    | 0.067  |
| A001980_01 | -0.464    | -0.071    | -0.211 | 0.334  | 0.43      | 0.966  | 0.326     | 0.486  |
| A001984_01 | 0.078 NA  |           | -0.047 | -0.003 | -0.138 NA |        | -0.169    | -0.104 |
| A001986_01 | -0.514    | -0.378    | -0.165 | -0.229 | -0.122    | 0.034  | -0.175    | -0.066 |
| A001988_01 | 0.058     | 0.194     | -0.268 | 0.27   | -0.08     | 0.259  | 0.337     | 0.552  |
| A001990_01 | 0.186 NA  |           | NA     | 0.195  | 0.213 NA  |        | -0.232    | 0.034  |
| A001996_01 | -0.4      | -0.4      | -0.306 | -0.303 | -0.357    | -0.576 | -0.28 NA  |        |
| A001997_01 | -0.25 NA  |           | -0.414 | -0.469 | 0.025 NA  |        | 0.291     | 0.291  |
| A002002_01 | 0.867     | 0.82      | 0.247  | 0.202  | 0.154     | 0.357  | 0.152     | -0.019 |
| A002003_01 | -0.089    | 0.039     | 0.22   | -0.329 | 0.174 NA  |        | 0.159 NA  |        |
| A002008_01 | -0.458    | -0.163    | -0.329 | -0.017 | 0.255     | 0.572  | -0.006    | 0.178  |
| A002009_01 | -0.564    | -0.458    | -0.14  | -0.514 | -0.178    | 0.04   | -0.121    | 0.08   |
| A002011_01 | 0.494     | 0.47      | -0.409 | -0.04  | 0.267     | 0.476  | -0.003    | 0.019  |
| A002013_01 | -0.667    | -0.505    | -0.941 | -0.809 | -0.392    | -0.196 | -0.123    | 0.141  |
| A002014_01 | -0.406    | -0.413    | -0.376 | -0.316 | -0.18     | -0.097 | -0.232    | -0.083 |
| A002016_01 | -0.168 NA |           | -0.713 | -0.709 | -0.162 NA |        | -0.164    | 0.083  |
| A002017_01 | -0.15     | -0.205    | -0.15  | 0.109  | -0.269    | -0.583 | 0.2 NA    |        |
| A002023_01 | -0.279    | -0.286    | -0.349 | -0.136 | 0.095     | -0.007 | 0.145     | -0.034 |
| A002026_01 | -0.15     | -0.311    | -0.684 | 0.257  | -0.419    | -0.525 | -0.329    | -0.275 |
| A002031_01 | -0.176    | -0.204    | -0.174 | -0.413 | -0.348    | -0.366 | -0.093    | -0.114 |
| A002032_01 | 0.062     | -0.012    | 0.186  | 0.251  | 0.24      | 0.204  | -0.032    | 0.008  |
| A002033_01 | -0.138    | -0.143    | 0.314  | -0.165 | 0.02      | -0.047 | 0.106     | 0.134  |
| A002035_01 | -0.72     | -0.606    | -0.587 | -0.208 | -0.393    | -0.309 | -0.28     | -0.205 |
| A002037_01 | -0.491    | -0.079 NA |        | -0.057 | -0.195    | -0.165 | -0.284    | 0.115  |
| A002038_01 | -0.269    | -0.327    | 0.228  | -0.168 | -0.064    | -0.138 | 0.117     | 0.039  |
| A002045_01 | -0.432    | -0.126    | 0.286  | 0.514  | 0.738     | 1.01   | 1.018     | 0.866  |
| A002050_01 | -0.168    | -0.095    | 0.021  | -0.339 | -0.211 NA |        | -0.134 NA |        |
| A002052_01 | 0.508     | 0.244     | 0.231  | 0.306  | 0.325     | 0.246  | 0.06      | 0.029  |
| A002054_01 | -0.861    | -0.757    | -0.414 | -0.032 | -0.2 NA   |        | -0.018    | 0.082  |
| A002059_01 | 0.319     | 0.619     | -0.2   | -0.935 | -0.162    | 0.158  | 0.152     | 0.159  |

|            |           |           |        |           |           |        |           |        |
|------------|-----------|-----------|--------|-----------|-----------|--------|-----------|--------|
| A002061_01 | 0.276     | 0.217     | -0.388 | 0.042     | -0.013    | 0.265  | -0.05     | -0.115 |
| A002062_01 | -0.37     | -0.251    | 0.174  | -0.032    | -0.349    | -0.557 | 0.064     | 0.304  |
| A002065_01 | -0.069    | 0.078     | -0.069 | -0.022    | -0.498    | -0.245 | -0.363 NA |        |
| A002066_01 | 0.037     | 0.097     | 0.264  | -0.115    | -0.22     | -0.329 | -0.02     | 0.02   |
| A002067_01 | -0.481    | -0.277    | -0.135 | -0.289    | -0.026    | 0.003  | -0.009    | 0.095  |
| A002068_01 | 0.083     | 0.19      | -0.38  | -0.187    | -0.111    | -0.132 | -0.155    | -0.044 |
| A002070_01 | -0.52     | -0.693    | -0.921 | -1.259    | -0.525    | -0.482 | -0.552    | -0.44  |
| A002073_01 | -0.127    | -0.022    | -0.162 | -0.216    | 0.143     | 0.537  | -0.314    | -0.242 |
| A002075_01 | -0.123    | -0.187    | -0.145 | 0.028     | -0.129    | -0.018 | 0.23      | 0.186  |
| A002076_01 | -0.018    | 0.104     | 0.484  | -0.05     | 0.192     | 0.191  | 0.408     | 0.37   |
| A002079_01 | -0.385    | -0.235    | -0.705 | -0.253    | -0.489    | -0.68  | -0.348    | -0.194 |
| A002080_01 | 0.059     | 0.175     | -0.345 | 0.02      | -0.127    | -0.116 | -0.176    | 0.048  |
| A002081_01 | 0.298     | 0.295     | 0.245  | 0.78      | 0.48      | 0.488  | 0.392     | 0.222  |
| A002082_01 | 0.027     | -0.191    | -0.507 | -0.301 NA |           | -0.597 | 0.178     | 0.081  |
| A002083_01 | 1.051     | 1.013     | 0.49   | -0.007    | 0.297     | 0.084  | 0.373 NA  |        |
| A002085_01 | -0.339    | -0.397    | -0.012 | -0.209    | -0.031    | -0.06  | 0.196     | 0.198  |
| A002086_01 | 0.185     | 0.071     | -0.001 | 0.093     | -0.123    | -0.121 | -0.002    | 0.075  |
| A002087_01 | -0.154    | 0.259     | 0.311  | 0.43      | -0.567    | -0.503 | 0         | 0.303  |
| A002088_01 | 0.01      | 0.493     | -0.116 | 0.023     | 0.538     | 0.906  | 0.246     | 0.462  |
| A002089_01 | -0.027    | 0.402     | 0.083  | -0.3      | 0.011     | 0.193  | -0.067 NA |        |
| A002090_01 | -0.076    | 0.063     | -0.369 | 0.152     | -0.026    | -0.05  | 0.116     | 0.088  |
| A002092_01 | 0.337     | 0.514     | 0.215  | 0.167     | 0.052 NA  |        | 0.265     | 0.271  |
| A002094_01 | -0.137    | 0.022     | -0.319 | 0.123     | -0.083    | -0.081 | -0.215    | -0.098 |
| A002096_01 | 0.21      | 0.214     | 0.057  | -0.334    | 0.223     | 0.313  | -0.034    | 0.047  |
| A002102_01 | -0.129    | -0.135    | -0.007 | -0.598    | -0.267    | -0.208 | 0.634     | 0.599  |
| A002103_01 | 0.159     | 0.146     | 0.019  | -0.187    | 0.22      | 0.309  | 0.57      | 0.397  |
| A002116_01 | -0.05     | -0.23     | 0.168  | 0.281     | 0.026     | -0.138 | 0.196     | 0.101  |
| A002117_01 | 0.32      | 0.423     | 0.27   | -0.129    | 0.183     | 0.403  | 0.21      | 0.301  |
| A002118_01 | -0.119    | 0.192     | 0.194  | -0.308    | 0.082     | 0.519  | 0.021     | 0.37   |
| A002120_01 | -0.4      | -0.389    | -0.624 | -0.587    | -0.314    | -0.392 | -0.718    | -0.642 |
| A002126_01 | 0.27      | 0.347     | 0.322  | -0.015    | 0.556     | 0.722  | 0.528     | 0.502  |
| A002130_01 | 0         | 0.119 NA  |        | -0.225    | 0.081     | 0.039  | 0.147 NA  |        |
| A002138_01 | -0.718    | -0.304    | 0.389  | 0.293     | -0.143    | -0.031 | 0.259     | 0.477  |
| A002142_01 | -0.619    | -0.435    | -0.341 | 0.236     | -0.203    | -0.181 | -0.361    | -0.156 |
| A002146_01 | 0.283     | 0.363     | 0.21   | 0.236     | -0.13     | 0.165  | 0.096     | 0.105  |
| A002147_01 | 0.327     | 0.552     | 0.218  | 0.188     | 0.239     | 0.33   | 0.023     | 0.087  |
| A002148_01 | 0.237     | 0.315     | 0.522  | 0.196     | 0.333     | 0.354  | 0.105     | 0.168  |
| A002149_01 | -0.915    | -0.988    | -1.747 | -1.57     | -0.271    | -0.387 | -1.123 NA |        |
| A002160_01 | -0.407    | -0.108    | -0.378 | -0.231    | 0.069     | 0.304  | 0.022 NA  |        |
| A002165_01 | -0.488    | -0.401    | -0.054 | -0.05     | -0.373    | -0.279 | -0.37     | -0.218 |
| A002171_01 | -0.061    | 0.13      | 0.211  | 0.534     | -0.384 NA |        | 0.006 NA  |        |
| A002175_01 | 0.061     | -0.118    | 0.138  | 0.005     | 0.204     | 0.074  | 0.211     | 0.025  |
| A002176_01 | 0.103     | 0.018     | -0.4   | 0.073     | -0.115    | -0.123 | -0.143    | -0.112 |
| A002178_01 | 0.077     | 0.089     | -0.268 | 0.117     | -0.07     | 0.293  | -0.339    | -0.195 |
| A002180_01 | -0.031    | 0.15      | 0.163  | 0.03      | 0.084 NA  |        | 0.176     | -0.005 |
| A002183_01 | -0.163    | -0.162    | -0.358 | 0.527     | -0.72     | -1.099 | -0.274    | -0.187 |
| A002184_01 | -1.638    | -1.552 NA | NA     |           | -0.968    | -0.959 | -0.973 NA |        |
| A002198_01 | 0.172 NA  |           | -0.045 | 0.351     | -0.313 NA |        | -0.167    | -0.007 |
| A002199_01 | 0.297     | 0.544     | 0.1    | 0.069     | -0.191 NA |        | 0.143     | 0.06   |
| A002206_01 | 0.334     | 0.137     | 0.089  | 0.191     | 0.006     | -0.057 | 0.026     | 0.008  |
| A002210_01 | 0.625     | 0.651     | 0.319  | 0.484     | 0.435     | 0.712  | 0.262     | 0.235  |
| A002214_01 | 0.077     | 0.198     | 0.104  | 0.104     | 0.182     | 0.215  | -0.025    | -0.136 |
| A002218_01 | 0.34      | 0.045     | 0.727  | 0.822 NA  | NA        |        | 0.275     | 0.306  |
| A002220_01 | -0.333    | -0.442    | -0.025 | 0.041     | 0.225     | 0.141  | -0.27     | -0.198 |
| A002224_01 | -0.654    | -0.24     | -0.887 | -0.464    | -0.404    | -0.016 | -0.561 NA |        |
| A002230_01 | -0.155    | 0.098     | 0.475  | 0.028     | -0.313    | -0.227 | 0.312     | 0.416  |
| A002232_01 | -0.488    | -0.564    | -0.086 | -0.097    | 0.613     | 0.822  | 0.51 NA   |        |
| A002235_01 | -1.066    | -1.345 NA |        | -1.212    | -0.907    | -0.898 | -1.023    | -0.491 |
| A002237_01 | -0.112    | -0.039    | -0.139 | 0.205     | -0.021    | 0.114  | -0.078    | 0.025  |
| A002243_01 | 0.026     | 0.156     | -0.176 | 0.235     | -0.004    | 0.351  | 0.11      | 0.129  |
| A002244_01 | -0.227    | -0.29     | 0.174  | 0.04      | 0.222     | 0.274  | 0.282     | 0.176  |
| A002246_01 | 0.212     | 0.13      | -0.01  | 0.375     | 0.144     | 0.134  | 0.008     | -0.096 |
| A002258_01 | 0.371     | 0.568     | 0.42   | 0.55      | 0.383     | 0.725  | 0.579     | 0.498  |
| A002259_01 | -0.209    | 0.013     | 0.184  | 0.311     | -0.099    | -0.076 | -0.229    | 0.102  |
| A002260_01 | 0.12      | 0.232     | 0.049  | -0.41     | 0.225     | 0.325  | -0.01     | 0.124  |
| A002266_01 | 0.123     | 0.395     | 0.091  | -0.616    | 0.022     | 0.21   | 0.081     | 0.154  |
| A002267_01 | -1.243 NA |           | -1.077 | -0.587    | -0.298 NA |        | -0.027 NA |        |
| A002272_01 | -0.155    | 0.148     | 0.38   | 0.288     | 0.069     | 0.122  | -0.02     | 0.117  |



|            |           |           |           |          |           |           |           |        |
|------------|-----------|-----------|-----------|----------|-----------|-----------|-----------|--------|
| A002283_01 | -0.135    | 0.065     | -0.48     | 0.517    | 0.083     | 0.043     | -0.01     | 0.278  |
| A002284_01 | 0.812     | 0.834     | 0.456     | 0.436    | 0.172     | 0.522     | -0.027    | 0.162  |
| A002285_01 | -0.324    | -0.415    | -0.597    | 0.581    | -0.341 NA |           | -0.517 NA |        |
| A002294_01 | -0.549    | -0.572    | -0.677    | 0.126    | 0.036     | -0.165    | -0.198    | 0.056  |
| A002308_01 | 0.52      | 0.448     | 0.784     | 0.791    | 0.232     | 0.515     | -0.173    | 0.031  |
| A002329_01 | 0.121     | 0.127     | -0.327    | -0.08    | 0.203     | 0.201     | -0.249    | -0.03  |
| A002330_01 | 0.414     | 0.468     | -0.134    | 0.048    | 0.164     | 0.387     | 0.138     | 0.154  |
| A002338_01 | 0.135     | -0.012    | 0.13      | 0.333    | 0.175     | 0.057     | 0.081     | 0.138  |
| A002345_01 | 0.171     | 0.237     | -0.009    | 0.289    | -0.026    | 0.24      | -0.03     | 0.06   |
| A002346_01 | -0.291    | -0.166    | -0.845    | -0.602   | -0.117    | -0.026    | -0.628    | -0.421 |
| A002349_01 | -0.983    | -0.981    | -1.146    | -0.32    | -0.68     | -0.747    | -0.65     | -0.271 |
| A002356_01 | -0.16     | -0.269    | -0.588    | 0.317    | -0.128    | 0.009     | -0.277 NA |        |
| A002359_01 | 0.556     | 0.633     | -0.287    | -0.592   | 0.309     | 0.427     | 0.019     | -0.044 |
| A002363_01 | -0.476    | -0.393    | -0.027    | -0.41    | -0.041    | -0.045    | -0.437    | -0.346 |
| A002365_01 | -0.116    | 0.209     | 0.097     | -0.088   | 0.323     | 0.366     | 0.094     | 0.141  |
| A002368_01 | -0.105    | 0.102     | 0.117     | -0.085   | -0.035    | 0.085     | 0.018     | 0.13   |
| A002369_01 | -0.268    | -0.143    | 0.303     | 0.473    | 0.092     | 0.034     | 0.099     | 0.177  |
| A002370_01 | 0.211     | 0.633     | 0.346     | 0.085    | -0.171    | -0.03     | -0.069    | 0.187  |
| A002372_01 | -0.154    | -0.132    | -0.233    | 0.377    | -0.103    | -0.155    | -0.359    | -0.068 |
| A002374_01 | -0.332    | -0.387    | -0.2      | 0.139    | -0.259    | -0.443    | 0.092 NA  |        |
| A002376_01 | -0.466 NA |           | -0.874 NA |          | 0.009 NA  |           | -0.458 NA |        |
| A002378_01 | 0.09      | 0.014     | 0.124     | 0.074    | 0.06      | -0.005    | -0.218    | 0.189  |
| A002383_01 | 0.203     | 0.337     | 0.106     | 0.441    | 0.26      | 0.509     | 0.356     | 0.472  |
| A002385_01 | 0.036     | 0.082     | -0.157    | 0.454    | -0.19     | -0.046    | -0.3 NA   |        |
| A002387_01 | 0.328     | 0.214     | -0.138    | 0.1      | 0.044     | 0.162     | -0.292    | -0.273 |
| A002390_01 | -0.17     | -0.041    | -0.058    | 0.09     | -0.215    | -0.164    | -0.139    | 0.071  |
| A002393_01 | -0.447    | -0.525    | -0.201    | 0.136    | -0.253    | -0.299    | -0.171    | -0.071 |
| A002405_01 | 0.13 NA   |           | -0.014    | 0.171    | 0.287 NA  |           | -0.086    | 0      |
| A002408_01 | -0.89     | -1.215    | -0.854    | -0.245   | -0.462    | -0.625    | -0.35     | -0.418 |
| A002409_01 | 1.104     | 1.287     | 1.748     | 2.13     | 0.825     | 0.978     | -0.373 NA |        |
| A002412_01 | 0.068     | 0.185     | -0.072    | -0.139   | 0.1       | 0.305     | -0.151    | 0.012  |
| A002413_01 | -0.043    | 0.301     | -0.447    | 0.099    | -0.21 NA  |           | -0.145    | 0.117  |
| A002417_01 | -1.108    | -0.897    | -1.193    | -0.356   | -0.646    | -0.47     | -0.438    | -0.005 |
| A002418_01 | 1.076     | 0.875     | 1.232     | 1.832    | 0.972     | 0.727     | -0.264    | -0.263 |
| A002425_01 | -0.287    | -0.046    | -0.264    | 0.536    | -0.181    | -0.093    | -0.175    | 0.212  |
| A002429_01 | 0.051     | 0.266     | 0.227     | 0.527    | 0.118     | 0.179     | -0.049    | 0.185  |
| A002432_01 | 0.192     | 0.285     | 0.323     | 0.266    | -0.081    | -0.044    | 0.127     | 0.239  |
| A002433_01 | -1.031    | -1.11     | -1.831    | -0.745   | -2.852    | -3.845 NA | NA        |        |
| A002437_01 | -0.777    | -0.797    | -0.732    | -0.397   | -0.572    | -0.697    | -0.418    | -0.356 |
| A002441_01 | 0.426     | 0.444     | -0.179    | -0.388   | -0.098    | 0.483     | -0.072    | 0.058  |
| A002454_01 | -0.837    | -0.615    | -0.434 NA |          | -0.364    | -0.289    | -0.212    | 0.273  |
| A002461_01 | 0.425     | 0.434     | -0.014    | 0.226    | 0.167     | 0.392     | 0.009     | -0.004 |
| A002473_01 | 0.767     | 0.757     | 0.343     | 0.144    | -0.217    | 0.347     | -0.174    | -0.055 |
| A002476_01 | -0.25     | 0.245     | -0.329    | -0.495   | -0.278    | 0.43      | -0.242    | 0.216  |
| A002480_01 | 0.662     | 0.857     | -0.133    | 0.119    | -0.096 NA |           | -0.396 NA |        |
| A002484_01 | -0.13     | -0.137    | -0.238    | 0.142    | -0.291    | -0.374    | -0.23     | -0.079 |
| A002488_01 | 0.65      | 0.547     | 0.159     | 0.134    | -0.022    | 0.123     | 0.165     | 0.175  |
| A002489_01 | -0.266    | 0.101     | -0.149    | 0.056 NA | NA        |           | -0.217    | -0.016 |
| A002491_01 | 0.55      | 0.526     | 0.578     | 0.547    | 0.516     | 0.647     | 0.566     | 0.37   |
| A002506_01 | 0.373     | 0.333     | 0.12      | -0.391   | 0.151     | 0.326     | 0.215     | 0.208  |
| A002514_01 | -1.704    | -1.633    | -1.732    | -1.209   | -1.151    | -1.206    | -0.157    | -0.041 |
| A002522_01 | -0.175    | -0.276    | -0.164    | 0.056    | -0.092    | -0.025    | -0.225 NA |        |
| A002523_01 | 0.121     | 0.324     | 0.025     | 0.318    | 0.01      | 0.251     | 0.158     | 0.23   |
| A002525_01 | -1.158 NA |           | 0.395     | 0.303    | -0.219 NA |           | 0.602     | 0.34   |
| A002534_01 | 0.015     | -0.166    | -0.35     | 0.052    | -0.038    | -0.473    | -0.313    | -0.238 |
| A002535_01 | -0.136    | -0.037    | -0.231    | 0.379    | 0.045     | 0.054     | -0.327    | 0.182  |
| A002537_01 | -0.708    | -0.359 NA |           | 0.473    | -0.168    | -0.204    | -0.092 NA |        |
| A002539_01 | 0.332     | 0.42      | 0.219     | 0.244    | 0.33      | 0.912     | 0.949     | 0.773  |
| A002540_01 | 0.011     | 0.172     | 0.136     | 0.554    | -0.076    | -0.017    | -0.159    | 0.06   |
| A002542_01 | 0.03      | 0.135     | -0.365    | -0.097   | -0.124    | 0.107     | -0.517    | -0.141 |
| A002545_01 | -0.075    | -0.298    | 0.015     | 0.304    | -0.114    | -0.356    | 0.047     | -0.056 |
| A002557_01 | -0.061    | -0.168    | -0.112    | 0.392    | -0.189    | -0.347    | -0.16     | 0.007  |
| A002558_01 | 0.116     | 0.01      | 0.152     | 0.116    | 0.214     | 0.145     | 0.229     | 0.18   |
| A002560_01 | -0.524    | -0.098    | -0.438    | 0.289    | -0.058    | -0.073    | -0.147    | 0.065  |
| A002561_01 | -0.193    | -0.24     | 0.125     | 0.171    | 0.065     | 0.012     | 0.161     | 0.148  |
| A002562_01 | -0.232    | 0.202     | 0.288     | 0.198    | -0.246    | -0.117    | -0.026    | 0.364  |
| A002580_01 | -2.482    | -2.039    | -2.057    | -1.856   | -1.984    | -1.81     | -0.899    | -0.548 |
| A002588_01 | 0.491     | 0.483     | 0.344     | 0.186    | 0.082     | 0.093     | 0.384     | 0.331  |

|            |           |           |          |        |           |        |           |        |
|------------|-----------|-----------|----------|--------|-----------|--------|-----------|--------|
| A002592_01 | 0.211     | 0.334     | -0.11    | 0.112  | 0.153     | 0.32   | -0.002    | 0.107  |
| A002599_01 | -0.663    | -0.582    | -0.126   | 0.539  | -0.501    | -0.486 | -0.116 NA |        |
| A002608_01 | -0.135    | -0.172    | -0.035   | 0.347  | 0.025     | -0.039 | 0.319     | 0.15   |
| A002609_01 | -0.461    | -0.275 NA |          | -0.328 | -0.235    | -0.207 | -0.398    | 0.023  |
| A002610_01 | 0.249     | 0.057     | -0.136   | 0.317  | -0.072    | -0.121 | -0.035    | -0.12  |
| A002618_01 | 0.365     | 0.421     | 0.376    | 0.836  | 0.51      | 0.614  | 0.526 NA  |        |
| A002623_01 | 0.164     | 0.428     | 0.075    | -0.2   | -0.156 NA |        | 0.331     | 0.46   |
| A002626_01 | -0.141 NA |           | -0.202   | 0.209  | -0.102 NA |        | -0.268    | -0.097 |
| A002632_01 | 0.044     | 0.141     | -0.085   | -0.082 | -0.182    | -0.058 | 0.025     | 0.164  |
| A002634_01 | -0.801    | -0.821    | -0.278   | -0.283 | -0.239    | -0.075 | -0.151    | 0.213  |
| A002641_01 | 0.105     | 0.227     | -0.431   | 0.072  | 0.015     | 0.151  | -0.137    | 0.127  |
| A002642_01 | -0.183    | 0.028     | -0.317   | -0.034 | 0.046     | 0.074  | -0.28 NA  |        |
| A002643_01 | 0.838     | 0.623     | 1.903    | 2.132  | 1.452     | 1.487  | 0.487     | 0.345  |
| A002644_01 | -0.107    | 0.059     | 0.031    | -0.03  | -0.133 NA |        | -0.096    | -0.074 |
| A002646_01 | 0.239     | 0.184     | 0.212    | -0.306 | 0.127     | 0.15   | 0.048     | -0.075 |
| A002647_01 | 0.574     | 0.298     | 0.225    | 0.384  | -0.231    | -0.271 | 0.036     | 0.001  |
| A002648_01 | -0.309    | -0.187    | 0.014    | 0.14   | 0.066     | 0.021  | 0.157     | 0.268  |
| A002650_01 | -0.01     | -0.143    | -1.008   | -0.771 | -0.099    | 0.086  | -0.045    | 0.024  |
| A002651_01 | 0.494     | 0.478     | 0.316    | 0.545  | 0.392     | 0.955  | 0.587     | 0.602  |
| A002656_01 | -0.171    | -0.035    | -0.068   | 0.131  | -0.21     | -0.299 | -0.315    | -0.193 |
| A002658_01 | 0.341     | 0.412     | 0.204    | 0.138  | 0.008     | 0.144  | -0.007    | -0.054 |
| A002659_01 | -0.373    | -0.002    | -0.02    | -0.02  | -0.108    | 0.214  | -0.005    | 0.367  |
| A002660_01 | 0.441     | 0.421     | 0.503    | 0.288  | -0.004    | 0.113  | 0.201     | 0.123  |
| A002662_01 | 0.079     | 0.313     | -0.052   | 0.177  | -0.061    | 0.1    | -0.072    | 0.029  |
| A002672_01 | -0.592    | -0.3      | -0.012   | -0.167 | -0.14     | -0.028 | -0.121    | -0.058 |
| A002674_01 | -0.954    | -0.951    | -0.481   | -0.025 | -0.427    | -0.652 | 0.017     | 0.045  |
| A002675_01 | -0.059    | -0.017    | 0.119    | -0.018 | 0.195     | -0.029 | 0.055     | -0.08  |
| A002676_01 | -0.291    | -0.213    | -0.223   | -0.896 | 0.295     | 0.745  | 0.226     | 0.201  |
| A002677_01 | 0.803     | 0.695     | 0.541    | 0.446  | 0.52      | 0.573  | 0.844     | 0.671  |
| A002678_01 | -0.458    | -0.41     | -0.131   | -0.165 | -0.252    | -0.505 | -0.098    | 0.033  |
| A002692_01 | -0.249    | -0.266    | 0.003    | 0.266  | -0.077    | -0.144 | 0.151     | 0.083  |
| A002695_01 | -0.827    | -0.465    | -0.298   | 0.254  | -0.423 NA |        | 0.231     | 0.088  |
| A002696_01 | 0.706     | 0.637     | 0.584    | 0.847  | 0.545     | 0.64   | -0.044    | -0.055 |
| A002699_01 | 0.091     | 0.134     | 0.161    | 0.363  | -0.029    | 0.044  | -0.057    | -0.032 |
| A002702_01 | -0.277    | -0.407    | -0.803   | -0.258 | -0.245    | -0.216 | -0.305    | -0.263 |
| A002703_01 | -0.055    | 0.005     | 0.167 NA |        | 0.077     | -0.054 | 0.173     | 0.151  |
| A002704_01 | -0.519    | -0.435    | -0.091   | 0.103  | 0.07      | 0.029  | 0.178     | 0.28   |
| A002706_01 | 0.128     | 0.111 NA  |          | -0.196 | 0.047     | 0.119  | -0.178 NA |        |
| A002712_01 | -1.031    | -0.611    | -0.083   | -0.293 | -0.553    | -0.34  | 0.294     | 0.531  |
| A002713_01 | -0.263    | -0.066    | -0.104   | 0.245  | -0.093    | -0.254 | 0.067     | -0.025 |
| A002718_01 | 0.055 NA  |           | -0.227   | 0.036  | 0.062 NA  |        | 0.013     | -0.159 |
| A002721_01 | -0.241 NA |           | -0.228   | 0.257  | -0.005 NA |        | 0.121     | 0.061  |
| A002724_01 | -0.145    | 0.041     | 0.434    | -0.246 | -0.187    | 0.022  | 0.144     | 0.183  |
| A002732_01 | 0.127     | 0.133     | -0.17    | -0.43  | 0.07      | 0.343  | -0.112    | -0.05  |
| A002733_01 | 0.526     | 0.412     | -0.392   | 0.173  | -0.03     | 0.1    | -0.165    | -0.094 |
| A002735_01 | -0.373    | -0.158    | -0.06    | 0.03   | -0.245    | -0.187 | -0.164    | 0.001  |
| A002736_01 | -0.038    | 0.108     | 0.148    | 0.523  | 0.102     | 0.036  | 0.001     | -0.026 |
| A002737_01 | -0.345    | 0.037     | -0.028   | 0.082  | 0.309     | 0.544  | 0.095     | 0.036  |
| A002738_01 | 0.5       | 0.452     | 0.074    | 0.408  | 0.321     | 0.339  | 0.317     | 0.212  |
| A002741_01 | 0.801     | 0.655     | 0.114    | 0.784  | -0.182    | -0.313 | 0.556     | 0.433  |
| A002742_01 | 0.246     | 0.253     | -0.278   | -0.161 | 0.068     | 0.11   | 0.38      | 0.287  |
| A002744_01 | 0.091     | 0.107     | 0.016    | -0.123 | 0.165     | 0.196  | 0.175     | 0.022  |
| A002750_01 | 0.083     | -0.097    | -0.16    | -0.061 | 0.046     | -0.008 | 0.085     | -0.063 |
| A002762_01 | -1.28     | -1.571    | -1.16    | -1.316 | -0.534    | -0.571 | -0.583    | -0.401 |
| A002768_01 | -0.244    | 0.058     | -0.192   | 0.271  | 0.054     | -0.103 | -0.101    | 0.002  |
| A002772_01 | 0.112     | 0.266     | 0.056    | 0.173  | 0         | -0.002 | -0.194    | -0.201 |
| A002773_01 | -0.338    | -0.135    | -0.346   | 0.059  | -0.031 NA |        | -0.077    | 0.002  |
| A002774_01 | -0.242    | -0.196    | -0.102   | 0.204  | -0.156    | -0.187 | -0.071    | -0.096 |
| A002777_01 | -0.184    | -0.136    | -0.197   | 0.121  | 0.05      | -0.057 | -0.039 NA |        |
| A002779_01 | 0.063     | -0.056    | 0.126    | 0.226  | 0.063     | -0.105 | 0.334     | 0.259  |
| A002780_01 | -0.142 NA |           | -0.361   | -0.029 | -0.088    | 0.34   | 0.034     | 0.05   |
| A002782_01 | -0.504    | -0.229    | 0.254    | 0.717  | -0.459    | -0.612 | 0.013     | 0.218  |
| A002787_01 | 0.421     | 0.382     | -0.225   | 0.129  | -0.33     | -0.194 | -0.405    | -0.221 |
| A002788_01 | -0.44     | -0.522    | -0.414   | -0.541 | -0.2      | -0.271 | -0.122    | -0.142 |
| A002793_01 | -0.364    | -0.389    | -1.011   | -0.877 | -0.079    | -0.26  | -0.476    | -0.369 |
| A002795_01 | -0.444    | -0.504    | -0.153   | 0.417  | 0.075     | 0.061  | -0.125 NA |        |
| A002797_01 | 0.543     | 0.408     | 0.175    | -0.603 | 0.349     | 0.378  | 0.067     | -0.002 |
| A002798_01 | -0.039    | -0.034    | -0.576   | -0.764 | 0.237     | 0.333  | 0.02      | -0.042 |

|            |           |        |        |        |           |        |           |        |
|------------|-----------|--------|--------|--------|-----------|--------|-----------|--------|
| A002800_01 | 0.272     | 0.211  | -0.031 | -0.086 | 0.104     | 0.466  | -0.238    | -0.099 |
| A002809_01 | 0.009     | -0.109 | 0.077  | 0.148  | 0.112 NA  |        | 0.001     | 0.011  |
| A002818_01 | -0.929    | -1.136 | -1.131 | -1.567 | -0.728    | -0.935 | -0.897    | -0.801 |
| A002820_01 | -0.103    | 0.304  | -0.031 | -0.071 | -0.023    | 0.16   | -0.204 NA |        |
| A002822_01 | -0.117    | -0.19  | 0.033  | 0.174  | -0.137    | -0.114 | -0.007    | -0.061 |
| A002823_01 | 0.073     | 0.078  | -0.169 | -0.254 | 0.169     | 0.05   | -0.22     | -0.256 |
| A002830_01 | 0.205     | 0.184  | -0.251 | 0.128  | -0.128    | 0.054  | -0.208    | -0.184 |
| A002834_01 | -0.48     | -0.649 | -0.593 | -0.4   | -0.188    | -0.067 | -0.224    | -0.142 |
| A002838_01 | 0.271     | 0.518  | 0.258  | 0.364  | 0.342 NA  |        | 0.18      | 0.087  |
| A002841_01 | -0.063    | -0.078 | -0.163 | 0.028  | -0.208    | -0.299 | -0.307    | -0.335 |
| A002842_01 | 0.259     | 0.232  | 0.37   | 0.594  | -0.274    | -0.484 | -0.097    | -0.098 |
| A002851_01 | -0.126    | -0.233 | -0.296 | -0.369 | 0.142     | -0.058 | -0.049    | -0.144 |
| A002854_01 | -0.764    | -0.7   | -1.399 | -1.085 | -0.177    | -0.24  | -0.609    | -0.546 |
| A002855_01 | -0.277    | -0.025 | 0.088  | 0.162  | -0.091    | -0.055 | -0.074    | -0.11  |
| A002858_01 | 0.632     | 0.59   | 0.376  | -0.107 | 0.175     | 0.098  | 0.12      | 0.009  |
| A002863_01 | -0.316    | -0.35  | -0.519 | -0.202 | 0.149     | 0.397  | 0.143     | 0.111  |
| A002866_01 | -0.5      | -0.164 | 0.285  | 0.404  | -0.305    | -0.282 | 0.021     | 0.228  |
| A002869_01 | -0.041    | 0.111  | 0.038  | -0.32  | 0.387     | 0.456  | -0.008    | 0.093  |
| A002871_01 | 0.211     | 0.165  | -0.044 | -0.554 | 0.138     | 0.028  | -0.271    | -0.28  |
| A002875_01 | 0.632     | 0.551  | 0.101  | 0.012  | 0.302     | 0.308  | 0.107     | -0.133 |
| A002881_01 | 0.223     | 0.385  | -0.161 | 0.555  | -0.103 NA |        | -0.113    | -0.191 |
| A002895_01 | -0.43     | -0.482 | 0.131  | -0.201 | -0.118    | -0.413 | 0.14      | 0.135  |
| A002896_01 | -0.322    | -0.083 | -0.154 | 0.14   | 0.159     | -0.203 | -0.17     | -0.011 |
| A002898_01 | -0.32     | -0.189 | -0.288 | -0.366 | -0.03 NA  |        | -0.098    | 0.101  |
| A002901_01 | 0.509     | 0.538  | 0.279  | 0.101  | -0.081    | 0.529  | -0.047    | 0.043  |
| A002902_01 | -0.112    | -0.075 | 0.05   | 0.099  | 0.116     | 0.036  | -0.166    | -0.016 |
| A002904_01 | 0.647     | 0.58   | -0.008 | -0.512 | 0.065     | 0.239  | -0.092    | -0.179 |
| A002907_01 | 0.104     | 0.196  | -0.126 | 0.192  | 0.076     | 0.081  | 0.159     | 0.163  |
| A002908_01 | -0.306    | -0.133 | 0.092  | 0.201  | 0.012     | -0.267 | 0.356     | 0.323  |
| A002916_01 | 0.465     | 0.515  | -0.018 | -0.043 | 0.183     | 0.569  | -0.048    | 0.176  |
| A002917_01 | 0.362     | 0.424  | 0.861  | 1.209  | 0.971     | 1.078  | 0.256     | 0.249  |
| A002919_01 | 0.054     | 0.059  | -0.078 | -0.111 | -0.075    | 0.068  | 0.046     | 0.154  |
| A002922_01 | -1.167    | -1.174 | -0.458 | -0.825 | -0.273    | -0.265 | -0.136    | -0.078 |
| A002923_01 | -0.528    | -0.324 | -0.231 | -0.09  | -0.457    | -0.225 | -0.326    | 0.169  |
| A002934_01 | 0.062     | 0.103  | -0.015 | -0.626 | -0.006    | 0.296  | -0.021    | 0.087  |
| A002939_01 | 0.015     | 0.067  | -0.397 | 0.045  | -0.105    | 0.042  | -0.27 NA  |        |
| A002940_01 | 0.504     | 0.285  | -0.008 | 0.324  | 0.273     | 0.3    | 0.284     | 0.234  |
| A002946_01 | 0.265     | 0.04   | -0.095 | 0.061  | 0.14      | -0.229 | 0.269     | 0.199  |
| A002950_01 | -0.894    | -0.833 | -0.66  | -0.236 | -0.084    | -0.161 | 0.031     | 0.226  |
| A002952_01 | -0.37     | -0.116 | 0.384  | 0.374  | 0.047     | 0.106  | 0.142     | 0.23   |
| A002955_01 | 0.314     | 0.603  | 0.555  | 0.202  | 0.073     | 0.312  | 0.369     | 0.124  |
| A002958_01 | 0.537     | 0.73   | 0.136  | -0.11  | 0.063     | 0.717  | 0.438     | 0.43   |
| A002977_01 | 0.104     | 0.039  | 0.001  | 0.153  | -0.095    | -0.064 | -0.076    | -0.069 |
| A002982_01 | 0.366     | 0.338  | -0.004 | -0.729 | 0.228     | 0.258  | 0.183     | 0.085  |
| A002988_01 | -1.433    | -1.361 | -1.004 | -0.467 | -0.946    | -1.095 | -0.261    | 0.232  |
| A002991_01 | -0.53     | -0.56  | 0.302  | 0.587  | 0.226     | 0.217  | -0.107    | 0.057  |
| A002993_01 | 0.184     | 0.289  | 0.439  | -0.238 | -0.056    | -0.103 | 0.12      | 0.123  |
| A002997_01 | -0.427    | -0.088 | -0.488 | -0.439 | -0.198    | -0.341 | -0.066 NA |        |
| A002998_01 | -0.061    | 0.031  | -0.408 | -0.161 | -0.001    | 0.384  | 0.18      | 0.145  |
| A002999_01 | -0.459    | -0.576 | -0.718 | -0.049 | -0.412    | -0.585 | -0.882    | -0.627 |
| A003001_01 | 0.205     | 0.104  | -0.053 | 0.098  | -0.031    | 0.069  | -0.064    | -0.101 |
| A003003_01 | -0.296    | -0.007 | -0.039 | -0.133 | -0.183    | -0.011 | -0.049 NA |        |
| A003004_01 | -0.746    | -0.683 | -0.202 | -0.029 | -0.246    | -0.103 | 0.119     | 0.03   |
| A003006_01 | 0.269     | 0.206  | -0.08  | 0.171  | 0.035     | -0.136 | 0.057     | 0.023  |
| A003011_01 | -0.214    | -0.179 | 0.268  | 0.17   | 0.02      | 0.022  | 0.06      | 0.045  |
| A003012_01 | -0.538 NA |        | -0.928 | -0.419 | -0.22 NA  |        | -0.148    | 0.189  |
| A003016_01 | -0.304    | -0.078 | 0.066  | 0.062  | -0.16     | -0.155 | -0.102    | -0.007 |
| A003018_01 | -1.605    | -1.884 | -1.387 | -0.854 | -0.809    | -0.947 | -0.595    | -0.295 |
| A003023_01 | -0.06     | -0.074 | 0.067  | -0.51  | 0.052     | 0.191  | 0.117     | 0.02   |
| A003024_01 | -0.682    | -0.462 | 0.426  | 0.101  | 0.112     | 0.112  | 0.374     | 0.41   |
| A003029_01 | -0.265    | -0.229 | 0.098  | 0.172  | 0.021     | -0.096 | -0.185    | 0.018  |
| A003034_01 | 0.247     | 0.302  | 0.64   | 0.433  | 0.067     | 0.145  | -0.072    | 0.177  |
| A003036_01 | 0.281     | 0.336  | 0.227  | -0.011 | 0.191     | 0.494  | 0.236     | 0.407  |
| A003037_01 | -0.404 NA |        | -0.211 | -0.216 | -0.281 NA |        | -0.095    | 0.05   |
| A003039_01 | 0.425     | 0.559  | 0.464  | -0.41  | -0.073    | 0.679  | 0.374     | 0.346  |
| A003042_01 | -0.396    | -0.457 | 0.271  | -0.06  | -0.014    | -0.019 | 0.086     | 0.172  |
| A003045_01 | 0.831     | 0.858  | 0.247  | 0.593  | 0.112     | 0.075  | -0.097    | -0.025 |
| A003050_01 | 0.087     | -0.085 | 0.232  | 0.082  | 0.226     | -0.044 | -0.076 NA |        |

|            |           |           |           |          |           |           |           |        |
|------------|-----------|-----------|-----------|----------|-----------|-----------|-----------|--------|
| A003054_01 | 0.036     | -0.172    | -0.075    | 0.388    | 0.061     | -0.092    | -0.253    | -0.305 |
| A003055_01 | -0.335    | -0.433    | -0.306    | -0.074   | -0.135    | -0.317    | 0.058     | 0.14   |
| A003056_01 | 0.112     | 0.043     | -0.255    | 0.225    | 0.183     | 0.023     | -0.137    | -0.019 |
| A003058_01 | 0.238     | 0.327     | 0.113     | -0.205   | 0.128     | 0.165     | -0.061    | 0.076  |
| A003059_01 | -0.564    | -0.335    | 0.055     | -0.032   | -0.406    | -0.202    | 0.124     | 0.303  |
| A003060_01 | -0.285    | -0.332    | -0.216    | 0.174    | -0.005    | 0.09      | 0.556     | 0.533  |
| A003070_01 | -2.053    | -2.176 NA | NA        | NA       | -1.877    | -2.532 NA | NA        | NA     |
| A003078_01 | 0.28      | 0.472     | 0.182     | 0.252    | -0.138    | -0.071    | -0.147    | 0.182  |
| A003079_01 | -0.087    | -0.015    | 0.192     | 0.193    | -0.084    | -0.172    | 0.032     | -0.008 |
| A003084_01 | 0.199     | 0.338     | 0.423     | 0.817    | 0.544     | 0.696     | -0.337    | -0.125 |
| A003092_01 | -0.665 NA |           | -0.577    | -0.08    | 0.102     | 0.029     | -0.245 NA |        |
| A003101_01 | -0.963    | -0.989    | -0.784    | -0.501   | -1.173    | -1.243    | -0.776    | -0.615 |
| A003106_01 | -0.28     | -0.192    | -0.125    | 0.124    | -0.092    | 0.011     | -0.188    | 0.055  |
| A003107_01 | 0.536     | 0.565     | 0.585     | 0.435    | -0.362    | -0.441    | 0.416     | 0.434  |
| A003109_01 | 0.163     | 0.539     | 0.823     | 0.262    | 0.251     | 0.386     | 0.499     | 0.425  |
| A003110_01 | -0.167    | -0.028    | 0.078     | -0.46    | 0.21      | 0.377     | -0.025 NA |        |
| A003112_01 | -0.576    | -0.605    | -0.342    | 0.133    | -0.212    | -0.248    | -0.088    | 0.034  |
| A003113_01 | 0.051     | 0.082     | -0.093    | 0.454    | -0.006    | -0.001    | 0.043     | 0.008  |
| A003114_01 | 0.063     | -0.132    | 0.136     | -0.128   | 0.347     | 0.264     | 0.622     | 0.271  |
| A003117_01 | -0.189    | -0.161    | 0.13      | -0.193   | 0.022     | -0.122    | -0.12     | -0.055 |
| A003121_01 | 0.298     | 0.321     | 0.119     | 0.341    | 0.328     | 0.215     | 0.141     | 0.093  |
| A003124_01 | -0.091    | 0.062 NA  |           | 0.456    | 0.342     | 0.893     | -0.338    | 0.054  |
| A003130_01 | 0.702     | 0.741     | 0.3       | -0.209   | -0.012    | 0.692     | 0.033     | 0.099  |
| A003131_01 | 0.1       | 0.452     | 0.229     | 0.002 NA | NA        |           | 0.1       | 0.078  |
| A003134_01 | -0.025    | -0.055    | 0.162     | 0.02     | -0.055    | -0.155    | -0.166    | -0.054 |
| A003137_01 | -0.184    | -0.124    | -0.033    | -0.02    | 0.03      | -0.116    | 0.037     | 0.02   |
| A003138_01 | -0.177    | -0.142    | 0.045     | 0.075    | -0.11     | 0.021     | -0.022    | 0.027  |
| A003141_01 | -1.013    | -1.002    | -0.745    | -0.508   | -0.355    | -0.261    | -0.11     | 0.011  |
| A003148_01 | 0.069     | -0.036 NA |           | -0.684   | 0.29      | 0.192     | -0.537    | -0.234 |
| A003154_01 | -0.013    | 0.063     | 0.171     | 0.053    | -0.235    | -0.201    | -0.031    | -0.011 |
| A003164_01 | 0.145     | 0.132     | -0.086    | 0.099    | -0.186 NA |           | -0.011 NA |        |
| A003170_01 | -0.345    | -0.214    | -0.076 NA |          | -0.078 NA |           | -0.236 NA |        |
| A003174_01 | 0.244     | 0.514     | -0.152    | -0.351   | 0.141     | 0.203     | -0.075    | -0.114 |
| A003181_01 | 0.185     | 0.27      | 0.307     | 0.117    | 0.131     | -0.07     | 0.09 NA   |        |
| A003184_01 | 0.597     | 0.719     | 0.276     | 0.165    | 0.227     | 0.46      | -0.08     | -0.045 |
| A003186_01 | 0.846     | 0.807     | 0.689     | 0.836    | 0.867     | 0.769     | 0.206     | 0.199  |
| A003189_01 | -0.058    | 0.206     | 0.134     | 0.417    | -0.027    | 0.151     | 0.069     | 0.115  |
| A003190_01 | 0.091     | 0.249     | 0.2       | 0.357    | 0.129     | 0.125     | 0.143     | 0.18   |
| A003194_01 | -0.053    | 0.038     | 0.195     | 0.472    | -0.175 NA |           | -0.119 NA |        |
| A003197_01 | 0.151     | 0.159     | -0.153    | 0.275    | 0.441     | 0.266     | 0.103     | 0.137  |
| A003198_01 | 0.268     | 0.449     | 0.163     | -0.042   | 0.179     | 0.311     | -0.133    | 0.011  |
| A003199_01 | 0.52      | 0.291     | 0.154     | -0.123   | 0.143     | 0.089     | 0.046     | 0.02   |
| A003207_01 | -0.689    | -0.615    | -0.935    | -1.469   | -0.452    | -0.53     | -0.106    | 0.069  |
| A003208_01 | 0.117     | 0.212     | -0.005    | 0.119    | 0.198     | 0.335     | 0.183     | 0.221  |
| A003209_01 | -0.181    | 0.182     | -0.149    | 0.291    | 0.219 NA  |           | 0.192     | 0.235  |
| A003213_01 | -0.045    | 0.069     | -0.07     | 0.181    | 0.071 NA  |           | 0.017     | 0.048  |
| A003214_01 | 0.234     | 0.021     | 0.293     | 0.429    | 0.12      | -0.094    | 0.025     | -0.075 |
| A003217_01 | -0.05     | 0.05      | 0.131     | -0.015   | 0.167     | 0.263     | 0.325     | 0.149  |
| A003222_01 | -0.424    | -0.147    | 0.463     | 0.506    | -0.466    | -0.188    | 0.24      | 0.323  |
| A003235_01 | 0.104     | 0.129     | 0.015     | 0.027    | 0.015     | 0.428     | 0.007     | -0.036 |
| A003237_01 | -0.371 NA |           | -0.027    | 0.857    | 0.344     | 0.691     | 0.828     | 0.755  |
| A003242_01 | -0.569    | -0.667    | -1.127    | -1.584   | -0.217    | -0.489    | -0.911    | -0.776 |
| A003245_01 | -0.154    | -0.251    | -0.28     | -0.233   | -0.342    | -0.273    | -0.183    | -0.269 |
| A003250_01 | 0.497     | 0.735     | 0.643     | 1.022    | 0.317     | 0.309     | 0.395     | 0.375  |
| A003252_01 | -0.172    | -0.295    | -0.153    | 0.061    | -0.071    | -0.099    | -0.263    | -0.212 |
| A003263_01 | 0.188     | 0.083     | 0.592     | 0.451    | 0.179     | -0.037    | 0.451     | 0.195  |
| A003264_01 | 0.556     | 0.333     | 0.249     | -0.025   | 0.436     | 0.419     | 0.207     | 0.108  |
| A003266_01 | 0.097     | -0.035    | -0.436    | 0.058    | 0.341     | 0.374     | -0.402    | -0.473 |
| A003274_01 | -0.014    | 0.053     | -0.048    | 0.109    | 0.028     | -0.164    | -0.028    | -0.036 |
| A003276_01 | 0.598     | 0.432     | 0.429     | 0.264    | 0.243     | 0.306     | 0.303     | 0.161  |
| A003277_01 | -0.208    | -0.261    | -0.115    | -0.067   | -0.012    | -0.178    | -0.088    | -0.144 |
| A003278_01 | 0.213     | 0.346     | -0.443    | -0.042   | 0.106     | -0.086    | -0.169    | -0.121 |
| A003280_01 | 0.081     | 0.354     | 0.267     | -0.219   | 0.047     | 0.382     | 0.172     | 0.198  |
| A003286_01 | -0.01 NA  |           | -0.45     | -0.109   | -0.217 NA |           | -0.019    | -0.09  |
| A003287_01 | -0.207    | -0.258    | -0.135    | -0.71    | 0.214     | 0.269     | 0.211     | 0.121  |
| A003291_01 | 0.959     | 0.818     | 0.482     | 0.001    | 0.292     | 0.568     | 0.479     | 0.281  |
| A003294_01 | -0.118    | -0.145    | -0.206    | 0.171    | -0.254    | -0.458    | 0.164     | 0.145  |
| A003299_01 | -0.025    | -0.136    | -0.457    | -0.389   | 0.232     | 0.159     | -0.239    | -0.166 |

|            |           |           |        |        |           |        |           |        |
|------------|-----------|-----------|--------|--------|-----------|--------|-----------|--------|
| A003304_01 | 0.08      | 0.261     | -0.138 | 0.004  | 0.028 NA  |        | -0.029    | 0.04   |
| A003311_01 | 0.68      | 0.426     | 0.294  | 0.196  | 0.137     | 0.27   | -0.041    | -0.124 |
| A003317_01 | 0.102     | 0.252 NA  |        | -0.554 | -0.092 NA |        | 0.149     | 0.206  |
| A003329_01 | -0.26     | -0.216    | -0.884 | -0.364 | -0.285    | -0.189 | -0.247    | -0.091 |
| A003333_01 | -0.135    | 0.077     | -0.238 | -0.072 | -0.026    | 0.068  | -0.052    | 0.024  |
| A003337_01 | -0.289    | -0.43     | -0.157 | -0.295 | -0.653    | -0.58  | -0.377    | -0.224 |
| A003339_01 | 0.138     | 0.06      | 0.087  | -0.037 | -0.243    | -0.106 | -0.081    | -0.092 |
| A003351_01 | 0.094     | 0.093     | 0.063  | 0.107  | 0.139     | 0.309  | -0.062    | -0.094 |
| A003354_01 | 0.978     | 1.022     | 0.345  | 0.331  | -0.177    | -0.033 | 0.07      | 0      |
| A003359_01 | 0.097     | 0.223     | -0.192 | 0.143  | -0.1 NA   |        | -0.233 NA |        |
| A003360_01 | 0.381     | 0.334     | -0.163 | 0.008  | -0.104    | -0.083 | -0.146    | -0.19  |
| A003365_01 | -0.383    | -0.253    | 0.275  | 0.455  | -0.317    | -0.185 | -0.105    | -0.094 |
| A003366_01 | 0.226     | 0.269     | 0.066  | 0.336  | -0.19     | -0.117 | -0.052    | -0.031 |
| A003367_01 | -0.2      | -0.369    | -0.277 | 0.092  | -0.331    | -0.289 | -0.141    | -0.236 |
| A003370_01 | -0.112    | -0.068    | 0.089  | 0.197  | 0.066     | -0.088 | -0.065    | -0.092 |
| A003371_01 | -0.13     | -0.015    | 0.072  | 0.134  | 0         | 0.146  | 0.035     | 0.209  |
| A003373_01 | 0.7       | 0.737     | -0.446 | -0.916 | 0.117     | 0.295  | -0.198    | -0.058 |
| A003377_01 | -0.289    | -0.214    | 0.221  | 0.379  | -0.216    | -0.195 | -0.047    | -0.041 |
| A003381_01 | -0.612 NA | NA        |        | -0.097 | 0.186     | 0.213  | -0.13     | -0.035 |
| A003382_01 | -0.057    | 0.078     | 0.035  | 0.065  | 0.045     | 0.004  | -0.058    | -0.08  |
| A003383_01 | -0.05     | 0.004     | -0.09  | -0.002 | 0.039     | 0.124  | -0.021    | 0.006  |
| A003385_01 | 0.869     | 0.78      | 0.683  | 0.753  | -0.258    | -0.418 | 0.286     | 0.172  |
| A003387_01 | 0.166     | 0.207     | -0.142 | 0.057  | 0.052     | 0.052  | 0.04      | 0.008  |
| A003388_01 | 0.192     | 0.112     | 0.146  | 0.029  | 0.058     | -0.068 | -0.14     | -0.07  |
| A003389_01 | 0.243     | 0.458     | 0.655  | 0.072  | 0.042     | 0.154  | 0.437     | 0.397  |
| A003393_01 | -0.376    | -0.089    | -0.016 | -0.054 | -0.044    | 0.167  | -0.141    | -0.103 |
| A003394_01 | 0.162     | 0.312     | 0.175  | 0.014  | 0.101     | 0.159  | 0.378     | 0.308  |
| A003395_01 | -0.284    | -0.112    | 0.182  | -0.1   | -0.257    | -0.533 | 0.185     | 0.053  |
| A003398_01 | -0.049    | 0         | 0.022  | -0.248 | -0.116    | 0.061  | -0.047    | 0.023  |
| A003404_01 | 0.047 NA  |           | -0.2   | -0.131 | 0.095 NA  |        | 0.293     | 0.204  |
| A003405_01 | -0.04     | -0.087    | 0.253  | 0.091  | -0.199    | 0.154  | 0.291     | 0.372  |
| A003406_01 | -0.135    | -0.188    | 0.34   | 0.256  | 0.051     | 0.224  | 0.379     | 0.306  |
| A003408_01 | -0.755    | -0.72     | 0.112  | 0.104  | -0.045    | -0.195 | -0.073 NA |        |
| A003409_01 | -0.215    | 0.063     | 0.115  | 0.013  | -0.181    | -0.368 | 0.092     | 0.059  |
| A003410_01 | -0.048    | -0.077    | -0.234 | -0.556 | 0.061     | 0.014  | 0.012     | -0.039 |
| A003411_01 | 0.406     | 0.51      | 0.413  | 0.677  | 0.498     | 0.678  | 0.245     | 0.227  |
| A003412_01 | 0.451     | 0.38      | 0.678  | 0.702  | 0.864     | 0.761  | 0.363     | 0.253  |
| A003418_01 | -0.974    | -1.035    | -0.493 | -0.354 | -0.43     | -0.401 | -0.368    | -0.267 |
| A003419_01 | -0.953    | -1.025    | -0.567 | -0.343 | -0.281    | -0.408 | -0.37     | -0.384 |
| A003423_01 | -2.563 NA | NA        | NA     |        | -2.169 NA |        | -0.866    | -0.522 |
| A003425_01 | 0.586     | 0.399     | 0.153  | 0.106  | 0.022     | 0.344  | -0.046    | -0.14  |
| A003428_01 | -0.584    | -0.471 NA |        | 0.209  | -0.192 NA |        | -0.182 NA |        |
| A003431_01 | -0.111    | -0.232    | -1.148 | -0.566 | 0.324     | 0.403  | -0.291    | -0.387 |
| A003433_01 | 0.236     | 0.416     | 0.28   | -0.118 | 0.106     | 0.121  | -0.201    | 0.102  |
| A003434_01 | -0.465    | -0.511    | -0.429 | -0.696 | -0.061    | -0.061 | -0.435    | -0.322 |
| A003440_01 | 0.043     | 0.035     | 0.038  | -0.036 | 0.034     | -0.011 | -0.071    | -0.082 |
| A003443_01 | -0.011 NA | NA        |        | -0.855 | -0.017 NA |        | 0.041 NA  |        |
| A003444_01 | 0.406     | 0.414     | 0.281  | 0.053  | 0.055     | 0.087  | -0.176    | -0.045 |
| A003446_01 | 0.063     | 0.161     | 0.127  | -0.073 | -0.057    | 0.087  | -0.053    | -0.035 |
| A003448_01 | 0.72 NA   |           | 0.167  | -0.308 | 0.257 NA  |        | 0.074     | 0.151  |
| A003456_01 | 0.13      | 0.269     | -0.299 | -0.248 | -0.194 NA |        | -0.331    | -0.161 |
| A003458_01 | -0.427    | -0.444    | -0.014 | -0.129 | -0.044    | -0.151 | -0.116    | 0.032  |
| A003460_01 | 0.445     | 0.438     | 0.129  | -0.204 | 0.257     | 0.287  | 0.061     | 0.051  |
| A003465_01 | -0.063    | -0.032    | -0.018 | 0.169  | 0.132     | 0.07   | -0.183 NA |        |
| A003467_01 | 0.107     | 0.344     | 0.084  | 0.615  | 0.2       | 0.287  | -0.181 NA |        |
| A003468_01 | -0.038    | -0.103    | -0.024 | -0.351 | 0.023     | -0.095 | -0.094    | -0.127 |
| A003470_01 | -0.203    | -0.294    | -0.099 | 0.006  | -0.002    | 0.05   | -0.058    | -0.024 |
| A003471_01 | -0.284    | -0.265    | -0.027 | 0.266  | 0.108     | -0.001 | 0.033     | 0.168  |
| A003472_01 | -0.108    | -0.245    | -0.185 | -0.025 | -0.052    | -0.023 | -0.061 NA |        |
| A003475_01 | 0.589     | 0.395     | -0.06  | 0.078  | -0.122    | -0.066 | -0.406    | -0.171 |
| A003478_01 | 0.212     | 0.267     | 0.205  | -0.313 | -0.036    | 0.165  | -0.083    | 0.016  |
| A003480_01 | -0.68     | -0.448    | 0.128  | 0.23   | 0.176     | 0.215  | 0.714     | 0.635  |
| A003483_01 | 0.203     | 0.193     | 0.066  | -0.102 | 0.046     | -0.05  | 0.057     | 0.092  |
| A003486_01 | 0.351     | 0.451     | 0.64   | 0.506  | -0.113    | -0.396 | 0.03      | 0.003  |
| A003488_01 | 0.038     | 0.091     | 0      | -0.107 | 0.09      | 0.178  | 0.049     | 0.084  |
| A003493_01 | 0.142     | 0.017     | -0.077 | 0.077  | 0         | 0.093  | -0.22     | -0.185 |
| A003497_01 | -0.578    | -0.605    | -0.727 | -0.211 | -0.09     | 0.028  | -0.276    | -0.194 |
| A003500_01 | -0.273    | -0.302    | -0.117 | 0.493  | 0.251     | 0.188  | -0.048    | 0.195  |

|            |           |        |           |          |           |        |           |        |
|------------|-----------|--------|-----------|----------|-----------|--------|-----------|--------|
| A003501_01 | -0.066    | -0.23  | -0.147    | 0.004    | 0.072     | -0.1   | -0.019    | 0.048  |
| A003503_01 | -0.736    | -0.815 | -0.197    | -0.55    | -0.213    | -0.206 | 0.087     | -0.128 |
| A003510_01 | 0.404     | 0.593  | 0.479     | 0.422    | 0.287     | 0.574  | 0.38      | 0.374  |
| A003512_01 | 0.006     | 0.278  | 0.08      | -0.552   | -0.048    | 0.25   | 0.135     | 0.203  |
| A003513_01 | 0.052     | -0.021 | 0.164     | 0.2      | -0.112    | -0.285 | -0.136    | -0.144 |
| A003518_01 | 0.045     | -0.052 | 0.218     | 0.085    | 0.224     | 0.238  | 0.289     | 0.243  |
| A003522_01 | 0.446     | 0.468  | -0.027    | 0.265    | -0.028 NA |        | -0.136    | 0.109  |
| A003523_01 | -0.303    | -0.166 | 0.069     | 0.142    | -0.389    | -0.274 | -0.148    | 0.149  |
| A003528_01 | -0.594    | -0.735 | -0.342    | -0.4     | -0.104    | -0.191 | -0.212    | -0.176 |
| A003530_01 | -0.646    | -0.543 | -0.315    | -0.188   | 0.012     | 0.007  | -0.093    | -0.082 |
| A003533_01 | -0.335    | -0.288 | -0.4      | -0.298   | -0.007    | -0.039 | 0.04      | 0.157  |
| A003535_01 | -0.23     | 0.003  | 0.115     | 0.347    | -0.151    | -0.325 | -0.523    | -0.326 |
| A003536_01 | -0.162    | 0.059  | -0.694    | -0.691   | -0.093    | 0.323  | -0.336 NA |        |
| A003537_01 | -0.441    | -0.435 | -0.196    | -0.293   | -0.145    | -0.088 | -0.376    | -0.217 |
| A003538_01 | 0.154     | 0.117  | 0.278     | 0.342    | 0.227     | 0.05   | 0.316     | 0.194  |
| A003540_01 | -0.317    | -0.238 | -0.883    | -0.973   | -0.139    | -0.13  | -0.639    | -0.419 |
| A003544_01 | 0.708     | 0.528  | 0.425     | -0.396   | 0.18 NA   |        | 0.364     | 0.273  |
| A003547_01 | 0.412     | 0.397  | 0.387     | 0.598    | -0.16     | -0.402 | 0.023     | 0.031  |
| A003553_01 | 0.106     | 0.162  | -0.172    | -0.175   | 0.208     | 0.388  | -0.037    | 0.098  |
| A003554_01 | 0.163     | 0.391  | 0.014     | 0.39     | 0.097     | -0.035 | 0.021     | -0.089 |
| A003555_01 | 0.673     | 0.754  | -0.607    | 0.508    | 0.375     | 0.538  | -0.096    | 0.099  |
| A003556_01 | -0.423    | -0.473 | 0.037     | 0.173    | 0.014     | 0.116  | 0.089     | 0.123  |
| A003560_01 | -0.354 NA |        | -0.491    | -0.414   | 0.13 NA   |        | -0.435 NA |        |
| A003567_01 | 0.955     | 1.226  | 1.33      | 1.249    | 0.074     | 0.28   | 0.615     | 0.73   |
| A003574_01 | 0.075     | 0.153  | 0.154     | 0.072    | 0.038 NA  |        | -0.193 NA |        |
| A003576_01 | -1.562    | -1.734 | -1.684    | -1.484   | -0.743    | -0.984 | -1.391    | -1.012 |
| A003588_01 | 0.186     | 0.196  | -0.12     | 0.562    | -0.148    | -0.162 | -0.095    | 0.048  |
| A003599_01 | -0.223    | -0.345 | -0.079    | -0.151   | -0.063    | -0.36  | -0.067    | -0.033 |
| A003604_01 | 0.104     | 0.298  | 0.265     | -0.315   | 0.36      | 0.359  | 0.339     | 0.292  |
| A003606_01 | -0.041    | 0.015  | -0.21     | 0.065    | -0.057    | -0.195 | -0.014    | 0.004  |
| A003607_01 | 0.203     | 0.404  | 0.272     | 0.443    | 0.214     | 0.216  | 0.15      | 0.141  |
| A003608_01 | -0.014    | 0.129  | 0.12      | 0.212    | -0.084    | 0.01   | 0.086     | 0.155  |
| A003610_01 | 0.011     | 0.01   | -0.09     | 0.003    | 0.177     | 0.048  | 0.082     | 0.075  |
| A003614_01 | 0.414     | 0.443  | 0.082     | -0.48    | 0.134     | 0.271  | -0.065    | -0.042 |
| A003617_01 | 0.053     | 0.102  | 0.567     | 0.548    | -0.139    | -0.209 | -0.232    | -0.111 |
| A003621_01 | 0.124     | 0.106  | -0.074 NA |          | 0.302     | 0.098  | -0.007 NA |        |
| A003628_01 | 0.29      | 0.562  | 0.18      | -0.153   | 0.104 NA  |        | 0.045     | 0.183  |
| A003630_01 | -0.052 NA | NA     |           | 0.306    | -0.175 NA |        | -0.214 NA |        |
| A003633_01 | -0.81     | -0.822 | -1.11     | -0.813   | -0.523    | -0.468 | -0.403    | -0.198 |
| A003636_01 | 0.451     | 0.491  | 0.052     | -0.438   | 0.039     | 0.353  | 0.026     | -0.062 |
| A003637_01 | -0.053    | -0.08  | 0.458     | 0.796    | -0.432    | -0.733 | -0.174    | -0.054 |
| A003641_01 | -0.651    | -0.123 | 0.232     | 0.158    | 0.045     | 0.201  | 0.217     | 0.544  |
| A003643_01 | 0.066 NA  |        | -0.246    | -0.042   | -0.003 NA |        | -0.146    | -0.086 |
| A003647_01 | -0.115    | -0.249 | -0.114    | 0.592    | -1.311    | -1.661 | -0.373    | -0.39  |
| A003648_01 | 0.195     | 0.321  | -0.017    | 0.115    | 0.105     | 0.399  | -0.068    | 0.045  |
| A003653_01 | -0.565    | -0.216 | -0.468    | 0.015    | -0.309    | -0.356 | -0.483    | -0.259 |
| A003655_01 | 0.267     | 0.225  | 0.065     | 0.211    | -0.016    | 0.042  | -0.153    | -0.149 |
| A003656_01 | 0.224     | 0.131  | -0.092    | 0.427    | 0.049     | 0.132  | -0.17     | -0.143 |
| A003657_01 | -0.181    | 0.052  | -0.058    | 0.265    | 0.054 NA  |        | -0.103 NA |        |
| A003660_01 | 0.233     | 0.348  | -0.028    | 0.332    | -0.424    | -0.026 | -0.343    | -0.037 |
| A003664_01 | 0.06      | -0.206 | -0.323    | 0.222    | -0.058    | -0.386 | -0.196    | -0.309 |
| A003665_01 | 0.167     | 0.166  | 0.05      | 0.341    | 0.176     | 0.164  | -0.061    | 0.072  |
| A003667_01 | 0.218     | 0.377  | -0.085    | 0.323    | -0.197 NA |        | -0.42 NA  |        |
| A003668_01 | -0.358    | -0.114 | 0.185     | -0.432   | 0.001     | 0.219  | -0.13     | 0.089  |
| A003671_01 | 0.026 NA  |        | -0.285    | -0.09 NA | NA        |        | -0.06     | -0.097 |
| A003672_01 | -0.746    | -0.635 | -0.442    | -0.061   | -0.335    | -0.14  | -0.046    | 0.061  |
| A003673_01 | -0.041    | 0.158  | 0.225     | 0.21     | -0.258    | -0.099 | 0.178     | 0.038  |
| A003675_01 | 0.257     | 0.39   | 0.139     | -0.57    | 0.297     | 0.673  | 0.298     | 0.313  |
| A003676_01 | 0.08      | 0.243  | 0.164     | 0.096    | -0.021 NA |        | -0.038    | 0.246  |
| A003678_01 | -0.02     | -0.156 | 0.026     | -0.655   | 0.099     | 0.082  | 0.011     | -0.172 |
| A003679_01 | 0.427     | 0.384  | 0.506     | 0.199    | 0.122     | 0.154  | 0.063     | 0.076  |
| A003681_01 | -0.566    | -0.47  | -0.335    | 0.078    | -0.102    | -0.209 | 0.05      | 0.076  |
| A003689_01 | 0.346     | 0.299  | -0.091    | -0.153   | 0.035     | 0.128  | 0.07      | 0.031  |
| A003690_01 | -0.486    | -0.56  | -0.459    | -0.032   | -0.632    | -0.65  | -0.142    | -0.08  |
| A003691_01 | -1.383    | -1.298 | -0.937    | -0.568   | -0.606    | -0.587 | -0.63 NA  |        |
| A003694_01 | 0.285     | 0.089  | -0.159    | 0.228    | -0.048    | -0.322 | -0.323    | -0.22  |
| A003695_01 | 0.622     | 0.649  | 0.05      | -0.287   | 0.172 NA  |        | -0.252    | -0.283 |
| A003696_01 | -0.546    | -0.547 | -0.392    | -0.261   | -0.266    | -0.285 | -0.081    | 0.001  |

|            |           |           |           |          |           |           |           |        |
|------------|-----------|-----------|-----------|----------|-----------|-----------|-----------|--------|
| A003698_01 | 0.536     | 0.511     | 0.675     | 0.912    | 0         | -0.093    | 0.083     | 0.15   |
| A003703_01 | -0.946    | -0.864    | -0.672    | -0.047   | -0.176    | -0.05     | -0.186    | -0.077 |
| A003706_01 | -0.223    | -0.226    | -0.1      | -0.152   | -0.335 NA |           | -0.163    | -0.139 |
| A003710_01 | 0.071     | 0.082     | 0.068     | -0.048   | 0.334     | 0.357     | 0.506     | 0.231  |
| A003714_01 | 0.041 NA  |           | -0.451    | -0.027   | 0.216 NA  |           | 0.084     | -0.057 |
| A003716_01 | 0.377     | 0.296     | 0.568     | 0.541    | 0.475     | 0.801     | 0.673 NA  |        |
| A003719_01 | -0.4 NA   | NA        |           | -0.542   | 0.028 NA  |           | -0.212    | -0.06  |
| A003720_01 | -0.797    | -0.936    | -0.814    | -0.545   | -0.272    | -0.344    | 0.298     | 0.17   |
| A003732_01 | 0.009     | -0.048    | 0.062     | 0.157    | -0.146    | -0.149    | -0.174    | -0.115 |
| A003736_01 | 0.466     | 0.748     | 0.791     | 0.776    | 0.619     | 0.936     | 0.805     | 0.9    |
| A003737_01 | -0.76     | -1.039    | -0.981    | -0.735   | -0.691 NA |           | -0.751    | -0.54  |
| A003743_01 | -0.367    | -0.105    | -0.773    | -0.981   | -0.314    | -0.117    | -0.68     | -0.291 |
| A003744_01 | -0.028    | 0.026     | -0.151    | -0.061   | 0.145     | 0.208     | 0.152     | 0.117  |
| A003750_01 | -0.93     | -0.504    | -0.555    | -0.523   | -0.624    | -0.392    | -0.63     | -0.4   |
| A003753_01 | 0.129     | 0.183     | 0.058     | -0.121   | -0.119    | -0.127    | 0.127     | 0.1    |
| A003754_01 | -0.12     | 0.063     | -0.083    | 0.195    | -0.218    | -0.284    | -0.173    | 0.027  |
| A003755_01 | 0.262     | 0.336     | 0.104     | -0.234   | 0.154     | 0.163     | 0.008     | -0.025 |
| A003756_01 | -0.076 NA |           | -0.204    | 0.199    | -0.162    | 0.067     | -0.117 NA |        |
| A003762_01 | 0.297     | 0.308     | -0.148    | -0.313   | 0.376     | 0.397     | 0.025     | -0.093 |
| A003767_01 | -0.181    | 0.155     | 0.487     | 0.361    | 0.216     | 0.069     | 0.074     | 0.181  |
| A003773_01 | -0.299    | -0.397    | -0.481    | 0.045    | 0.008     | -0.175    | -0.106    | -0.302 |
| A003775_01 | -0.169    | -0.024    | 0.022     | 0.28     | 0.069     | 0.008     | -0.397    | -0.411 |
| A003789_01 | 0.165     | 0.299     | -0.267    | -0.025   | 0.179     | 0.026     | -0.162    | -0.045 |
| A003800_01 | 0.636     | 0.63      | -0.085    | 0.148    | -0.374    | -0.15     | -0.135    | -0.125 |
| A003802_01 | 0.396     | 0.292     | 0.321     | 0.368    | 0.249     | 0.184     | 0.224     | 0.109  |
| A003803_01 | 0.178     | 0.553     | 0.179 NA  |          | 0.221     | 0.452     | -0.156    | 0.132  |
| A003804_01 | -1.332    | -1.013    | -1.032    | -0.552   | -0.563    | -0.517    | -0.003    | 0.271  |
| A003808_01 | -0.14     | -0.01     | -0.171    | 0.203    | 0.159     | 0.273     | 0.153     | 0.186  |
| A003809_01 | 0.096     | 0.092     | 0.124     | 0.252    | 0.082     | 0.095     | -0.051 NA |        |
| A003817_01 | 0.149     | 0.323 NA  |           | -0.236   | -0.953    | -0.779    | -0.498 NA |        |
| A003820_01 | -0.381    | -0.057    | -0.039    | -0.396   | -0.14     | -0.071    | -0.115    | 0.136  |
| A003825_01 | 0.597     | 0.747     | 0.84      | 0.878    | 0.476     | 0.415     | 0.184     | 0.046  |
| A003826_01 | 0.323     | 0.125     | -0.074    | -0.019   | -0.104 NA |           | -0.025    | -0.034 |
| A003827_01 | -0.303    | -0.021    | -0.124    | -0.31    | -0.133    | 0.027     | -0.022    | 0.11   |
| A003829_01 | -0.446    | -0.352    | -0.005    | -0.129   | -0.061    | -0.158    | -0.032 NA |        |
| A003844_01 | -2.671    | -2.855    | -0.057    | -0.038   | -3.094    | -3.72     | -1.114    | -0.779 |
| A003846_01 | 0.063     | 0.104     | -0.023    | 0.253    | -0.058    | -0.134    | -0.26     | -0.134 |
| A003849_01 | 0.26      | 0.438     | -0.268    | -0.718   | -0.028 NA |           | -0.163    | 0.089  |
| A003851_01 | -0.055    | 0.125     | -0.067    | -0.147   | 0.301     | 0.554     | 0.478     | 0.632  |
| A003854_01 | -0.019    | -0.029    | 0         | 0.089    | 0.182     | 0.026     | 0.111     | 0.36   |
| A003860_01 | -0.129    | -0.297    | -0.292    | 0.511    | -0.107    | -0.528    | -0.166    | -0.182 |
| A003861_01 | -0.246    | 0.072     | -0.004    | -0.373   | 0.046     | 0.08      | 0.044     | 0.079  |
| A003863_01 | -0.514    | -0.253    | -0.035    | 0.423    | 0.072     | 0.074     | 0.316     | 0.274  |
| A003864_01 | 0.259     | 0.288     | -0.26     | -1.054   | 0.221     | 0.589     | -0.051    | -0.065 |
| A003869_01 | -0.507    | -0.469    | -0.554    | 0.014    | -0.236    | -0.059    | -0.174    | -0.034 |
| A003872_01 | -0.528    | -0.85     | 0.153     | 0.081    | -0.534    | -0.889    | 0.066     | 0.07   |
| A003875_01 | -0.595    | -0.387    | 0.062     | -0.048   | -0.243    | -0.301    | -0.024    | 0.155  |
| A003876_01 | -0.496    | -0.288    | -0.298    | -0.361   | -0.08     | 0.032     | -0.065 NA |        |
| A003885_01 | 0.229     | 0.248     | 0.08      | -0.412   | -0.194    | 0.04      | 0.114     | 0.102  |
| A003889_01 | 0.15      | 0.184     | 0.449     | 0.363    | 0.364     | 0.846     | 0.604     | 0.484  |
| A003898_01 | 0.023     | 0.126     | -0.021    | -0.145   | -0.087    | -0.112    | -0.193    | -0.165 |
| A003910_01 | 0.447     | 0.443     | -0.09     | -0.339   | 0.014     | 0.251     | 0.068     | -0.222 |
| A003914_01 | -0.07     | -0.141    | -0.242    | 0.338    | -0.048    | -0.009    | -0.092    | -0.102 |
| A003915_01 | -0.69     | -0.79     | -0.278    | -0.207   | -0.279    | -0.333    | 0.054     | 0.073  |
| A003921_01 | -0.338    | -0.13     | -0.626    | 0.206    | -0.364    | -0.216    | -0.525    | -0.195 |
| A003925_01 | -0.032    | 0.076     | 0.017     | -0.194   | 0.166     | 0.15      | 0.048     | 0.09   |
| A003926_01 | 0.049     | -0.004    | -0.229    | 0.171    | 0.039     | 0.11      | 0.016     | 0.133  |
| A003932_01 | -0.658    | -0.878    | 0.148     | 0.718    | -0.459 NA |           | 0.137     | 0.034  |
| A003933_01 | -0.83     | -0.654    | -0.63     | -0.736   | -0.292    | -0.313    | -0.461    | -0.278 |
| A003940_01 | -0.104 NA |           | -0.396 NA |          | 0.111 NA  |           | -0.211 NA |        |
| A003947_01 | -0.378    | -0.102 NA | NA        |          | 0.059     | -0.189 NA | NA        |        |
| A003948_01 | 0.458     | 0.483     | 0.457     | 0.508    | -0.051 NA |           | 0.226     | 0.384  |
| A003952_01 | -0.264    | -0.103    | -0.249    | 0.45     | -0.501    | -0.34     | -0.301 NA |        |
| A003958_01 | -0.066    | 0.023     | 0.451     | 1.105 NA |           | 0.231     | 0.047     | 0.121  |
| A003959_01 | -0.481    | -0.58     | -0.698    | -0.648   | -0.185    | -0.408    | -0.369    | -0.361 |
| A003960_01 | 0.016     | -0.169    | -0.541    | -0.412   | 0.015     | 0.263     | -1.504    | -1.013 |
| A003961_01 | -0.207    | -0.115 NA |           | 0.401    | -0.151    | -0.256    | -0.221    | 0.013  |
| A003965_01 | -0.31     | -0.111    | 0.245     | -0.028   | 0.125     | 0.195     | 0.431 NA  |        |

|            |           |           |        |        |           |        |           |        |
|------------|-----------|-----------|--------|--------|-----------|--------|-----------|--------|
| A003968_01 | -0.338    | -0.682    | -0.295 | -0.009 | -0.264    | -0.242 | -0.23     | -0.281 |
| A003969_01 | -0.923    | -1.069    | -0.543 | -0.121 | -0.348    | -0.243 | -0.395    | -0.15  |
| A003974_01 | -0.171    | -0.053    | -0.3   | 0.041  | -0.295    | 0.099  | -0.294    | -0.21  |
| A003979_01 | 0.164     | 0.21      | 0.093  | 0.201  | -0.115    | 0.146  | -0.039    | 0.021  |
| A003982_01 | -0.751    | -0.871 NA | NA     |        | -0.601    | -1.064 | -0.687 NA |        |
| A003984_01 | -0.473    | -0.494    | -0.144 | -0.209 | -0.123    | -0.172 | -0.079    | -0.107 |
| A003989_01 | -0.312    | 0.163     | 0.072  | -0.055 | -0.074    | 0.348  | -0.156    | 0.212  |
| A003991_01 | 0.205     | 0.189     | -0.324 | -0.238 | 0.289     | 0.1    | -0.23     | -0.213 |
| A003997_01 | -1.391    | -1.47     | -1.368 | -0.884 | -0.967    | -1.474 | -0.847    | -0.557 |
| A004000_01 | -0.846    | -0.852    | -0.878 | -0.087 | -0.245    | -0.371 | -0.255    | -0.143 |
| A004003_01 | -0.658    | -0.636    | -0.186 | 0.043  | -0.319    | -0.213 | 0.107     | 0.174  |
| A004018_01 | -0.284    | -0.423    | 0.281  | 0.271  | 0.014     | 0.102  | 0.463     | 0.399  |
| A004026_01 | 0.093     | 0.32      | 0.352  | 0.143  | 0.228     | 0.37   | 0.074     | 0.207  |
| A004038_01 | -1.063    | -0.419    | -0.309 | -0.152 | -0.59     | -0.219 | -0.515    | 0.113  |
| A004039_01 | -0.562    | -0.569    | 0.194  | 0.729  | 0.067     | 0.038  | 0.204     | 0.232  |
| A004044_01 | 0.022     | 0.212     | -0.129 | -0.097 | -0.091    | 0.196  | -0.192    | 0.038  |
| A004045_01 | -0.195    | -0.213    | 0.155  | 0.06   | -0.073    | -0.222 | -0.056    | -0.042 |
| A004048_01 | 0.448     | 0.441     | 0.288  | -0.317 | 0.302     | 0.637  | 0.24      | 0.223  |
| A004058_01 | -0.107    | -0.191    | -0.076 | 0.007  | 0.159     | 0.261  | 0.043     | 0.016  |
| A004098_01 | -0.006    | 0.102     | -0.211 | 0.13   | -0.047    | -0.005 | -0.2      | 0.098  |
| A004103_01 | -0.343    | -0.099    | 0.043  | 0.153  | -0.019    | -0.083 | 0.009     | 0.109  |
| A004107_01 | -0.581    | 0.022     | 0.251  | 0.219  | 0.373     | 1.077  | 0.245     | 0.602  |
| A004121_01 | -0.045    | 0.204     | 0.052  | 0.289  | -0.322    | -0.039 | -0.414    | -0.267 |
| A004122_01 | 0.03      | -0.129    | -0.16  | 0.107  | 0.001     | -0.194 | -0.121    | -0.019 |
| A004144_01 | -0.148    | -0.187    | 0.028  | 0.052  | 0.178     | -0.141 | 0.115     | -0.109 |
| A004145_01 | -0.118    | 0.216     | -0.144 | 0.241  | -0.003    | 0.181  | -0.237    | 0.033  |
| A004150_01 | -0.229    | -0.193    | 0.048  | -0.271 | 0.117     | -0.017 | 0.005     | 0.109  |
| A004151_01 | -0.279    | 0.365     | -0.202 | 0.255  | -0.167    | 0.319  | -0.207    | 0.04   |
| A004152_01 | -0.058    | 0.165     | -0.138 | -0.067 | 0.196     | 0.234  | -0.02     | 0.069  |
| A004157_01 | 0.44      | 0.271     | 0.262  | 0.46   | -0.044    | -0.006 | 0.287     | 0.101  |
| A004165_01 | -0.216    | -0.668    | -0.167 | -0.442 | -0.097    | -0.169 | -0.061    | -0.209 |
| A004173_01 | 0.063     | 0.121     | 0.325  | 0.09   | 0.024     | 0.068  | -0.02     | -0.012 |
| A004175_01 | -0.254    | -0.141    | -0.053 | 0.217  | -0.004    | 0.078  | 0.082 NA  |        |
| A004177_01 | 0.395     | 0.754     | 0.386  | 0.514  | 0.515     | 0.63   | -0.176 NA |        |
| A004181_01 | -1.77 NA  |           | -1.406 | -0.871 | -0.911 NA |        | 0.258     | 0.29   |
| A004219_01 | -0.009    | -0.053    | -0.159 | -0.265 | -0.006    | -0.137 | 0.066     | 0.111  |
| A004221_01 | -0.256    | 0.009     | -0.09  | 0.228  | -0.106    | -0.361 | -0.112 NA |        |
| A004223_01 | -0.154    | -0.096    | 0.457  | 0.9    | 1.044     | 1.302  | 0.266     | 0.19   |
| A004225_01 | -1.966    | -2.308    | -0.848 | -1.116 | -1.768    | -2.288 | -0.267    | -0.268 |
| A004236_01 | -0.092    | 0.295     | -0.311 | 0.161  | 0.084 NA  |        | 0.15      | 0.381  |
| A004241_01 | -0.048    | 0.019     | 0.238  | 0.355  | 0.158     | 0.062  | 0.069     | -0.052 |
| A004242_01 | 0.335     | 0.295     | -0.503 | 0.039  | -0.037    | 0.122  | -0.198    | -0.088 |
| A004243_01 | 0.093     | 0.067     | 0.493  | 0.335  | 0.133     | 0.094  | 0.015     | -0.01  |
| A004244_01 | -0.271    | -0.216    | -0.198 | -0.734 | 0.192     | 0.215  | -0.135    | -0.054 |
| A004253_01 | 0.451 NA  |           | 0.011  | 0.036  | -0.041 NA |        | 0.027     | 0.094  |
| A004271_01 | 0.23      | 0.241     | 0.626  | 0.576  | -0.059    | -0.143 | 0.338     | 0.132  |
| A004272_01 | -0.978    | -1.095    | -0.977 | -0.506 | -0.394    | -0.471 | -0.256    | -0.068 |
| A004276_01 | 0.345     | 0.623     | 0.101  | -0.16  | 0.188     | 0.622  | 0.056     | 0.013  |
| A004281_01 | 0.414     | 0.433     | 0.618  | 0.357  | 0.142     | 0.209  | 0.432     | 0.31   |
| A004284_01 | -0.022    | -0.302    | 0.424  | 0.721  | -0.298    | -0.73  | -0.194    | -0.219 |
| A004285_01 | -1.411    | -1.29     | -1.364 | -1.369 | -0.65     | -0.957 | -0.989    | -0.563 |
| A004288_01 | -0.04     | -0.003    | 0.071  | 0.103  | 0.006     | -0.108 | 0.001     | -0.066 |
| A004289_01 | -0.347    | -0.328    | -0.377 | 0.099  | -0.25     | -0.004 | 0.138     | 0.299  |
| A004290_01 | -0.29     | -0.601    | -0.238 | -0.026 | -0.168    | -0.24  | -0.188    | -0.166 |
| A004300_01 | 0.283     | 0.214     | 0.262  | 0.074  | 0.206     | -0.054 | 0.059     | 0.006  |
| A004305_01 | -0.647    | -0.478    | -0.765 | -0.594 | -0.412    | -0.367 | -0.358    | -0.282 |
| A004306_01 | -0.46     | -0.459 NA |        | 0.054  | -0.062 NA | NA     |           | -0.13  |
| A004311_01 | 0.303 NA  |           | -0.318 | -0.175 | -0.037 NA |        | -0.124    | -0.029 |
| A004313_01 | -0.171    | -0.229    | -0.109 | 0.022  | -0.14     | -0.252 | 0.23      | 0.199  |
| A004314_01 | -3.021    | -3.721 NA |        | -2.95  | -1.716    | -1.915 | -2.293    | -1.625 |
| A004319_01 | 0.072     | 0.164     | -0.174 | -0.034 | -0.028    | -0.144 | -0.075    | 0.033  |
| A004320_01 | -1.522    | -1.764    | -0.976 | -0.565 | -1.073    | -1.494 | -1.831    | -1.514 |
| A004325_01 | 0.255     | 0.201     | -0.307 | -0.222 | 0.203     | 0.038  | -0.022    | -0.016 |
| A004335_01 | -0.068 NA |           | 0.142  | 0.352  | 0.049 NA  |        | -0.172    | -0.119 |
| A004343_01 | -0.125    | 0.1       | 0.418  | 0.354  | 0.079     | 0.178  | 0.212     | 0.18   |
| A004347_01 | 0.055     | 0.311     | 0.201  | -0.127 | 0.147     | 0.204  | 0.144     | 0.129  |
| A004349_01 | -0.179    | 0.077     | 0.161  | 0.112  | 0.307     | 0.369  | 0.036     | 0.075  |
| A004350_01 | -0.41     | -0.159    | 0.589  | 0.369  | -0.105    | -0.121 | 0.078     | 0.167  |



|            |           |           |         |         |           |          |           |        |
|------------|-----------|-----------|---------|---------|-----------|----------|-----------|--------|
| A004359_01 | 0.25 NA   |           | -0.029  | -0.192  | 0.16 NA   |          | -0.051    | 0.168  |
| A004362_01 | -0.138    | -0.038    | 0.118   | -0.232  | 0.111     | 0.071    | -0.124 NA |        |
| A004378_01 | 0.012     | -0.139    | 0.1     | 0.197   | 0.101     | -0.069   | 0.197     | -0.052 |
| A004382_01 | -0.217    | -0.128    | -0.168  | -0.187  | -0.014    | -0.055   | -0.331    | -0.121 |
| A004383_01 | -0.109    | -0.125    | -0.106  | 0.136   | 0.102     | -0.016   | -0.09     | 0.042  |
| A004386_01 | 0.017     | -0.073    | -0.048  | -0.23   | 0.031     | 0.195    | 0.131     | 0.18   |
| A004392_01 | -0.283    | -0.136    | -0.381  | -0.391  | -0.06     | -0.111   | -0.169 NA |        |
| A004393_01 | -0.149    | -0.201    | 0.137   | 0.026   | 0.022     | -0.132   | -0.059    | -0.253 |
| A004396_01 | -0.159    | -0.321    | -0.151  | 0.108   | -0.113    | -0.061   | -0.08     | 0.024  |
| A004397_01 | -0.508    | -0.526    | -0.207  | -0.066  | 0.007     | -0.158   | -0.043    | -0.097 |
| A004398_01 | -0.016    | -0.016    | 0.097   | -0.077  | 0.394     | 0.457    | 0.048     | 0.108  |
| A004404_01 | -1.676    | -1.693    | -1.638  | -1.39   | -0.927    | -0.985   | -1.201    | -1.12  |
| A004406_01 | 0.064     | 0.13      | 0.035   | -0.021  | 0.074 NA  |          | -0.043    | -0.091 |
| A004407_01 | 0.894     | 0.632     | 0.179   | -0.827  | 0.136     | 0.313    | 0.02      | -0.001 |
| A004408_01 | 0.548     | 0.559     | -0.366  | -0.676  | 0.566     | 0.755    | 0.213     | -0.073 |
| A004413_01 | 0.181     | 0.247     | -0.39   | -0.152  | -0.08     | 0.203    | 0.038     | 0.074  |
| A004417_01 | -0.352    | -0.302    | 0.52    | -0.254  | -0.373    | -0.296   | 0.226 NA  |        |
| A004424_01 | 0.116     | -0.126    | 0.085   | 0.244   | 0.246     | 0.001    | -0.081    | -0.105 |
| A004425_01 | 0.22      | 0.301     | 0.631   | 0.631   | 0.249     | 0.288    | 0.084     | 0.194  |
| A004426_01 | -0.202    | -0.378    | -0.202  | 0.105   | 0.135     | 0.195    | 0.103     | 0.139  |
| A004429_01 | -0.162    | -0.234    | 0.293   | -0.165  | -0.142    | -0.29    | 0.004     | 0.101  |
| A004431_01 | 0.996     | 1.041     | 1.254   | 1.495   | 0.26      | 0.291    | 0.323     | 0.3    |
| A004434_01 | -0.05     | 0.023     | 0.425   | 0.147   | 0.193     | 0.093    | 0.449     | 0.221  |
| A004437_01 | -0.324    | 0.055     | -0.072  | -0.265  | -0.245    | 0.156    | -0.137    | 0.04   |
| A004439_01 | 0.477     | 0.417     | 0.553   | 0.388   | 0.396     | 0.338    | 0.336     | 0.039  |
| A004442_01 | -1.49     | -0.745 NA | NA      |         | -0.764    | -0.34    | -0.629    | 0.141  |
| A004448_01 | 0.601     | 0.424     | -0.178  | -0.364  | 0.294     | 0.537    | 0.117     | 0.12   |
| A004449_01 | 0.328     | 0.006     | -0.14   | -0.08   | 0.08      | 0.304    | -0.003    | -0.145 |
| A004451_01 | 0.004     | -0.061    | -0.389  | -0.114  | 0.007     | -0.105   | -0.118    | 0.089  |
| A004452_01 | 0.176     | 0.415     | -0.445  | 0.024   | 0.096 NA  |          | -0.162 NA |        |
| A004454_01 | 0.183     | 0.203     | -0.176  | 0.177   | 0.205     | -0.061   | -0.367    | -0.24  |
| A004456_01 | -0.394    | -0.209    | -0.672  | -0.38   | -0.169    | -0.302   | -0.395    | -0.304 |
| A004458_01 | -0.84     | -0.719    | -0.69   | -1.093  | 0.074     | -0.054   | -0.193    | -0.211 |
| A004461_01 | -0.299    | -0.304    | 0.137   | 0.092   | -0.195    | -0.394   | 0.15      | 0.221  |
| A004462_01 | -0.225    | -0.22     | -0.454  | -0.185  | -0.119    | -0.162   | -0.22     | -0.118 |
| A004464_01 | -0.013    | 0.18      | 0.051   | -0.139  | 0.273     | 0.415    | 0.014     | 0.148  |
| A004466_01 | -0.258    | -0.438    | 0.125   | 0.461   | -0.125 NA |          | -0.095    | -0.139 |
| A004467_01 | 0.191 NA  |           | 0.01    | 0.38 NA | NA        |          | -0.061    | -0.021 |
| A004468_01 | 0.261     | 0.083     | 0.331   | 0.178   | 0.12      | -0.073   | 0.316     | 0.003  |
| A004469_01 | 0.157     | -0.009    | 0.127   | 0.201   | 0.363     | 0.111 NA | NA        |        |
| A004470_01 | -0.43     | -0.482    | -0.249  | -0.257  | -0.141    | -0.402   | 0.009     | -0.179 |
| A004472_01 | 0.206 NA  |           | 0.49    | 0.245   | -0.06 NA  |          | 0.328     | 0.093  |
| A004474_01 | 0.334     | 0.278     | -0.385  | -0.251  | 0.013 NA  |          | -0.121    | -0.173 |
| A004481_01 | -0.112    | -0.297    | -0.373  | -0.285  | -0.137    | -0.137   | -0.344    | -0.236 |
| A004483_01 | 0.03      | 0.088     | 0.128   | 0.129   | 0.033     | 0.201    | 0.256     | 0.274  |
| A004484_01 | -0.694    | -0.41     | -0.275  | -0.254  | -0.347    | -0.081   | -0.122    | 0.07   |
| A004488_01 | -0.225    | -0.224    | 0.15 NA |         | 0.027 NA  |          | 0.062 NA  |        |
| A004489_01 | -0.552    | -0.363    | -0.602  | -0.29   | 0.153     | 0.117    | -0.227    | -0.006 |
| A004491_01 | -0.317    | 0.068     | -0.358  | -0.203  | -0.229    | 0.036    | -0.141    | 0.094  |
| A004493_01 | -0.568 NA |           | -0.076  | 0.275   | -0.016 NA |          | 0.017     | 0.085  |
| A004494_01 | 0.055     | 0.08      | 0.055   | 0.012   | 0.195     | 0.123    | -0.052    | -0.004 |
| A004495_01 | 0.102     | 0.327     | 0.031   | -0.246  | 0.48      | 0.743    | 0.379     | 0.358  |
| A004497_01 | -0.242    | -0.226    | 0.445   | 0.385   | 0.054     | -0.076   | 0.315     | 0.166  |
| A004498_01 | -0.352    | -0.038    | 0.267   | 0.045   | -0.248    | -0.1     | -0.15     | 0.184  |
| A004502_01 | 0.676     | 0.856     | 0.007   | -0.25   | 0.341     | 0.39     | 0.13      | 0.04   |
| A004505_01 | 0.157     | 0.184     | -0.46   | 0.08    | -0.343    | -0.367   | -0.102    | 0.001  |
| A004509_01 | 0.442     | 0.258     | -0.058  | -0.381  | -0.017    | 0.173    | -0.009    | -0.152 |
| A004511_01 | 0.196     | 0.267     | 0.588   | 0.065   | 0.22      | 0.289    | 0.042     | -0.014 |
| A004514_01 | 0.095     | 0.032     | -0.234  | 0.123   | 0.126     | 0        | 0.126     | 0.076  |
| A004515_01 | -0.179    | 0.03      | -0.079  | -0.122  | -0.178 NA |          | 0.269     | 0.264  |
| A004519_01 | 0.519     | 0.617     | 0.134   | 0.054   | 0.279     | 0.676    | 0.157     | 0.245  |
| A004520_01 | 0.249     | 0.29      | 0.004   | -0.295  | 0.291     | 0.177    | 0.126     | 0.055  |
| A004522_01 | 0.133     | 0.205     | -0.052  | -0.003  | 0.046     | 0.328    | -0.038    | 0.131  |
| A004523_01 | -0.468    | -0.599    | -0.369  | -0.099  | 0.097     | -0.015   | 0.123     | 0.057  |
| A004524_01 | -0.208    | -0.108    | -0.141  | -0.038  | -0.075 NA |          | -0.155 NA |        |
| A004526_01 | 0.227     | 0.278     | 0.129   | -0.008  | 0.05      | -0.076   | -0.131    | 0.021  |
| A004527_01 | 0.308     | 0.369     | 0.139   | -0.214  | 0.244     | 0.362    | 0.361     | 0.192  |
| A004528_01 | 0.835     | 0.798     | 0.342   | 0.209   | 0.133     | 0.456    | 0.196     | 0.094  |

|            |           |          |          |          |           |           |           |        |
|------------|-----------|----------|----------|----------|-----------|-----------|-----------|--------|
| A004534_01 | -0.093    | -0.147   | -0.164   | 0.399    | 0.087     | 0.145     | 0.238     | 0.184  |
| A004537_01 | -0.483    | -0.08    | 0.191    | 0.194    | -0.613    | -0.492    | -0.175    | 0.08   |
| A004541_01 | 0.045     | 0.285    | 0.108    | 0.031    | 0.069     | 0.402     | -0.002    | 0.206  |
| A004542_01 | 0.392     | 0.546    | 0.277    | 0.314    | 0.485     | 0.658     | 0.103     | -0.119 |
| A004545_01 | -0.375    | -0.442   | -0.143   | -0.208   | -0.325    | -0.272    | -0.185    | -0.107 |
| A004548_01 | 0.539     | 0.518    | -0.014   | 0.482    | 0.424     | 0.565     | -0.009    | 0.03   |
| A004549_01 | -1.028    | -0.937   | -0.614   | -0.875   | -0.434    | -0.812    | -0.31     | -0.198 |
| A004553_01 | -0.406    | -0.208   | 0.204    | 0.059    | -0.31     | -0.122    | -0.041    | 0.064  |
| A004557_01 | -0.843    | -0.659   | -0.308   | -0.453   | -0.345    | -0.485    | -0.444    | -0.281 |
| A004558_01 | 0.18      | 0.16     | 0.156    | 0.332    | -0.118    | -0.054    | -0.01     | 0.042  |
| A004559_01 | 0.032     | 0.218    | -0.256   | -0.068   | 0.066     | 0.028     | -0.168    | -0.129 |
| A004560_01 | -0.163    | -0.221   | 0.07     | 0.285    | -0.191    | -0.214    | -0.136    | -0.214 |
| A004576_01 | 0.089     | -0.084   | 0.086    | 0.19     | 0.073     | -0.081    | -0.029    | -0.044 |
| A004577_01 | -0.061    | 0.192    | 0.002    | -0.325   | 0.115     | 0.409     | -0.236 NA |        |
| A004578_01 | -0.027    | 0.393 NA |          | -0.01    | -0.016    | 0.374     | 0.093     | 0.315  |
| A004582_01 | -0.338    | -0.359   | -0.284   | 0.099    | -0.215    | -0.166    | -0.171    | 0.013  |
| A004587_01 | -0.941    | -0.898   | -1.186   | -1.104   | 0.157     | 0.247     | -0.525    | -0.412 |
| A004588_01 | -1.187    | -1.331   | -1.13    | -0.836   | -0.283    | -0.323    | -0.818    | -0.565 |
| A004593_01 | 0.115     | 0.121    | 0.063    | 0.134    | -0.327    | -0.15     | 0.004     | -0.128 |
| A004594_01 | -0.617    | -0.664   | 0.014    | -0.061   | -0.146    | -0.336    | 0.275     | 0.365  |
| A004596_01 | 0.267     | 0.249    | 0.168    | 0.271    | -0.075    | -0.012    | -0.079    | -0.009 |
| A004597_01 | 0.013     | -0.024   | 0.16     | 0.087    | 0.013     | -0.058    | 0.039     | 0.02   |
| A004598_01 | -0.106    | -0.266   | -0.108   | 0.125    | -0.063    | -0.078    | -0.131    | -0.216 |
| A004599_01 | 0.627     | 0.491    | -0.105   | 0.048    | 0.087     | 0.404     | -0.112    | -0.032 |
| A004602_01 | -0.055    | -0.274   | -0.653   | -0.076   | 0.262     | 0.117     | 0.13      | -0.016 |
| A004603_01 | -0.784    | -0.491   | -0.463   | -0.424   | -0.167    | -0.035    | 0.039     | 0.057  |
| A004604_01 | 0.202     | 0.156    | 0.286    | 0.515    | 0.317     | 0.258     | -0.793    | -0.339 |
| A004609_01 | -0.124    | 0.339    | -0.1     | 0.201 NA |           | 0.003     | -0.287    | -0.037 |
| A004610_01 | -0.188    | -0.028   | -0.087   | -0.105   | -0.021    | 0.087     | 0.011     | 0.207  |
| A004612_01 | -1        | -0.749   | -0.25    | -0.18    | 0.304     | 0.597     | 0.124     | 0.533  |
| A004615_01 | 0.239     | 0.315    | 0.254    | 0.111 NA |           | 0.03      | -0.027    | 0.106  |
| A004616_01 | -0.571    | -0.388   | -0.607   | -0.38    | -0.07     | 0.008     | -0.003    | 0.009  |
| A004617_01 | 0.048     | 0.221    | 0.158    | 0.03     | 0.113     | 0.177     | -0.172    | -0.03  |
| A004618_01 | 1.155     | 1.105    | 0.164    | 0.078    | 0.428     | 0.865     | 0.367     | 0.404  |
| A004619_01 | 0.612     | 0.729    | 0.554    | 0.287    | 0.066     | 0.437     | 0.479     | 0.345  |
| A004620_01 | -0.089    | 0.063    | -0.618   | 0.076    | -0.073    | -0.106    | -0.038    | -0.07  |
| A004622_01 | -0.931    | -1.213   | -2.063   | -1.283   | -2.23     | -3.533 NA |           | -2.088 |
| A004623_01 | 0.105     | 0.204    | -0.048   | -0.146   | 0.049     | 0.167     | -0.026    | 0.093  |
| A004629_01 | 0.372     | 0.454    | -0.177   | -0.011   | 0.088     | 0.116     | -0.321    | -0.235 |
| A004630_01 | 0.065     | -0.153   | 0.181    | -0.116   | -0.161    | -0.3      | 0.026     | -0.007 |
| A004634_01 | -1.119    | -0.608   | -0.02    | -0.259   | -0.566    | 0.017     | -0.158    | 0.304  |
| A004635_01 | -0.134    | 0.111    | 0.406 NA |          | -0.03     | 0.067     | 0.204 NA  |        |
| A004636_01 | -0.291    | -0.403   | -0.25    | 0.019    | -0.268    | -0.34     | -0.112    | 0.088  |
| A004637_01 | -0.33     | 0.126    | 0.049    | 0.216    | -0.452 NA |           | -0.112 NA |        |
| A004644_01 | -0.231    | -0.089   | -0.469   | -0.049   | -0.14     | 0.007     | -0.044    | -0.081 |
| A004645_01 | 0.17      | 0.323    | -0.208   | 0.075    | 0.136     | 0.178     | 0.207     | 0.086  |
| A004646_01 | -0.229    | -0.284   | -0.08    | 0.564    | -0.27     | -0.439    | -0.303    | -0.207 |
| A004649_01 | -0.404    | -0.288   | 0.001    | -0.067   | -0.163    | -0.145    | 0.113     | -0.033 |
| A004650_01 | -0.029    | 0.086    | 0.201    | -0.204   | 0.093     | -0.106    | 0.26      | 0.094  |
| A004652_01 | 0.673     | 0.779    | 0.222    | 0.557    | -0.358 NA |           | 0.136     | 0.225  |
| A004653_01 | 0.079     | 0.118    | 0.451    | 0.085    | -0.129    | 0.042     | -0.15 NA  |        |
| A004656_01 | 0.007     | 0.365    | 0.253    | 0.152    | 0.185     | 0.322     | 0.812     | 0.695  |
| A004657_01 | -0.239    | -0.106   | 0.045    | 0.295    | -0.134    | -0.178    | -0.174    | 0.037  |
| A004659_01 | 0.183     | 0.141    | -0.035   | -0.18    | 0.094     | -0.081    | 0.02      | -0.01  |
| A004664_01 | -0.061    | 0.042    | -0.307   | -0.112   | 0.098     | 0.062     | 0.288     | 0.204  |
| A004669_01 | 0.2       | 0.069    | 0.177    | 0.085    | 0.134     | 0.213     | 0.146     | 0.382  |
| A004670_01 | 0.02      | -0.056   | 0.126    | -0.116   | 0.22      | 0.007     | -0.052    | 0.014  |
| A004671_01 | 0.026     | 0.053    | -0.142   | 0.224    | 0.177     | 0.112     | -0.025    | 0.217  |
| A004678_01 | -0.114    | -0.112   | -0.42    | 0.151    | 0.103     | -0.013    | 0.063     | -0.018 |
| A004680_01 | 0.06      | -0.044   | -0.174   | 0.232    | -0.004    | -0.157    | 0.022     | 0.062  |
| A004682_01 | 0.607     | 0.538    | 0.533    | 0.106    | 0.652     | 0.56      | 0.561     | 0.41   |
| A004683_01 | 0.373     | 0.501    | 0.055    | -0.172   | 0.017     | 0.183     | 0.06      | 0.26   |
| A004684_01 | 0.361     | 0.038    | 0.239    | 0.661    | -0.303    | -0.255    | -0.573    | -0.535 |
| A004688_01 | -0.233    | -0.485   | 0.144    | -0.047   | 0.072     | 0.19      | 0.193     | 0.086  |
| A004689_01 | 0.64      | 0.399    | -0.108   | 0.21     | -0.148    | -0.067    | 0.677     | 0.482  |
| A004695_01 | -0.219    | -0.119   | -0.133   | -0.018   | 0.014     | -0.242    | -0.052 NA |        |
| A004696_01 | 0.277 NA  |          | 0.221    | 0.624    | 0.326 NA  |           | 0.12 NA   |        |
| A004701_01 | -0.775 NA |          | 0.482 NA |          | -0.406    | -0.054    | 0.01      | 0.466  |

|            |           |           |        |        |           |        |           |        |
|------------|-----------|-----------|--------|--------|-----------|--------|-----------|--------|
| A004704_01 | 0.63      | 1.078     | -0.199 | 0.019  | 0.285     | 0.896  | -0.381    | -0.067 |
| A004705_01 | 0.09      | 0.308     | -0.086 | -0.289 | 0.287     | 0.432  | 0.117     | 0.077  |
| A004714_01 | -0.645    | -0.519    | -0.255 | 0.277  | -0.433    | -0.603 | -0.304 NA |        |
| A004716_01 | -0.48 NA  |           | -0.238 | -0.712 | -0.257 NA |        | 0.088     | -0.079 |
| A004717_01 | 0.11      | 0.181     | 0.386  | 0.031  | 0.204     | 0.424  | 0.298     | 0.185  |
| A004722_01 | -0.506    | -0.724    | -0.639 | -1.217 | -0.178    | 0.003  | -0.183    | -0.279 |
| A004725_01 | 0.09      | -0.188    | 0.098  | 0.171  | 0.005     | -0.026 | 0.128     | -0.006 |
| A004727_01 | 0.165     | 0.059     | 0.278  | 0.402  | 0.001     | 0.058  | 0.483     | 0.406  |
| A004728_01 | -0.383    | -0.407    | -0.012 | 0.038  | 0.287     | 0.355  | -0.016    | -0.084 |
| A004735_01 | 0.053     | 0.324     | 0.15   | -0.4   | 0.163     | 0.165  | 0.227     | 0.142  |
| A004736_01 | -0.508    | -0.555    | -0.139 | -0.517 | -0.142    | -0.185 | -0.12     | 0.04   |
| A004738_01 | -0.632    | -0.331    | -0.18  | -0.192 | -0.146    | -0.13  | -0.2 NA   |        |
| A004739_01 | 0.066 NA  |           | 0.545  | 0.534  | 0.23 NA   |        | 0.106     | 0.227  |
| A004740_01 | -0.636 NA | NA        |        | 0.292  | -0.619 NA |        | 0.069     | 0.249  |
| A004743_01 | -0.362    | -0.208    | 0.018  | -0.012 | -0.188    | -0.156 | -0.018    | 0.167  |
| A004744_01 | -0.37     | -0.106    | -0.166 | 0.287  | -0.246    | -0.217 | -0.214    | 0.071  |
| A004747_01 | 0.218     | 0.103     | -0.13  | 0.132  | 0.106     | 0.085  | -0.005    | -0.056 |
| A004748_01 | 0.154     | 0.015     | 0.303  | 0.107  | -0.141    | -0.197 | -0.12     | -0.141 |
| A004752_01 | 0.875     | 1.184     | 0.807  | 0.354  | 0.042     | 0.27   | 0.084     | 0.227  |
| A004754_01 | 0.015     | 0.159     | -0.166 | -0.021 | 0.06      | 0.238  | -0.073 NA |        |
| A004757_01 | -0.025    | -0.077    | -0.261 | 0.156  | -0.113    | 0.201  | -0.311    | -0.064 |
| A004759_01 | -0.216    | -0.106    | -0.1   | 0.118  | -0.007    | -0.054 | -0.154    | -0.151 |
| A004762_01 | -0.264    | -0.053    | -0.461 | 0.138  | 0.056     | 0.215  | 0.163     | 0.15   |
| A004766_01 | 0.225     | 0.2       | -0.242 | 0.201  | 0.152     | 0.131  | 0.135     | 0.1    |
| A004768_01 | 0.275     | 0.252     | -0.036 | -0.344 | 0.015     | 0.181  | 0.02      | -0.042 |
| A004769_01 | -0.918    | -0.924    | -0.66  | -0.916 | -0.232    | -0.135 | -0.589    | -0.328 |
| A004772_01 | -0.074    | -0.132    | -0.284 | 0.176  | -0.085    | -0.299 | -0.152    | -0.155 |
| A004774_01 | 0.176     | 0.101     | -0.036 | -0.42  | 0.223     | 0.377  | -0.074    | 0.032  |
| A004777_01 | -0.519    | -0.461    | -0.414 | 0.145  | -0.566    | -0.485 | 0.206     | 0.185  |
| A004789_01 | 0.038     | -0.087    | -0.448 | 0.026  | -0.164    | -0.015 | -0.275    | -0.145 |
| A004792_01 | -0.424    | -0.438    | 0.01   | 0.071  | 0.05      | -0.307 | -0.036    | -0.012 |
| A004795_01 | 0.606     | 0.618     | 0.908  | 0.595  | -0.221 NA |        | 0.37      | 0.282  |
| A004799_01 | -0.189    | -0.145    | -0.109 | -0.156 | 0.074     | 0.173  | 0.196     | 0.152  |
| A004801_01 | -0.071    | 0.123     | -0.002 | -0.096 | -0.174    | -0.142 | -0.093    | 0.014  |
| A004804_01 | 0.036     | 0.249     | -0.114 | 0.23   | -0.104    | 0.118  | -0.214    | 0.029  |
| A004805_01 | 0.374     | 0.487     | -0.266 | -0.086 | -0.291    | 0.07   | -0.291    | 0.08   |
| A004810_01 | 0.298     | 0.33      | -0.074 | 0.09   | 0.198     | 0.42   | 0.14      | 0.054  |
| A004815_01 | -0.168    | 0.018     | 0.088  | -0.161 | 0.501     | 0.569  | -0.022    | 0.073  |
| A004820_01 | 0.537     | 0.394     | -0.344 | 0.125  | -0.093    | -0.024 | -0.157    | -0.162 |
| A004825_01 | -0.201    | -0.234    | -0.147 | -0.164 | -0.409    | -0.5   | -0.059    | -0.069 |
| A004828_01 | 0.086     | 0.032     | 0.091  | 0.048  | 0.077     | -0.105 | 0.168     | 0.055  |
| A004830_01 | -0.095    | -0.001    | -0.167 | -0.021 | -0.062    | 0.184  | -0.061    | -0.008 |
| A004837_01 | -0.385    | -0.401    | -0.331 | -0.399 | -0.122    | 0.037  | -0.068    | -0.072 |
| A004839_01 | -0.306    | -0.274    | -0.204 | 0.21   | -0.003    | -0.194 | -0.184    | -0.116 |
| A004842_01 | -0.04     | -0.095    | -0.452 | 0.15   | -0.058    | 0.059  | -0.312    | -0.18  |
| A004843_01 | -0.452    | -0.4      | -0.398 | -0.708 | -0.17     | -0.106 | -0.104    | 0.004  |
| A004846_01 | 0.416     | 0.614     | 0.567  | 0.965  | -0.243 NA |        | -0.127    | -0.022 |
| A004848_01 | 0.1       | 0.288     | 0.028  | -0.086 | 0.428     | 0.608  | 0.562     | 0.522  |
| A004853_01 | -0.19     | -0.169    | -0.271 | -0.109 | -0.011    | -0.046 | -0.12     | -0.169 |
| A004859_01 | 0.627     | 0.768     | 0.296  | 0.059  | 0.48      | 1.101  | 0.656     | 0.616  |
| A004860_01 | -0.141    | 0.201     | 0.371  | 0.152  | 0.291     | 0.735  | 0.35      | 0.526  |
| A004862_01 | 0.18      | 0.021     | -0.01  | 0.099  | 0.059     | 0.206  | -0.063    | -0.09  |
| A004863_01 | -0.273    | -0.276    | -0.22  | 0.059  | -0.195    | -0.248 | -0.179    | -0.203 |
| A004866_01 | 0.1       | 0.018     | -0.147 | 0.216  | -0.05     | -0.033 | -0.175    | -0.231 |
| A004867_01 | -0.253    | 0.092     | -0.314 | -0.664 | 0.023     | 0.158  | -0.093    | -0.043 |
| A004882_01 | -0.799    | -0.725 NA | NA     | NA     | -0.297    | -0.324 | -0.769 NA |        |
| A004883_01 | -0.398    | -0.348    | 0.098  | -0.02  | -0.195    | -0.331 | -0.165    | -0.246 |
| A004885_01 | 0.421     | 0.404     | 0.486  | 0.483  | 0.132     | -0.001 | 0.039     | 0.011  |
| A004887_01 | -0.122    | -0.088    | 0.075  | 0.409  | -0.071    | -0.171 | -0.112    | 0.003  |
| A004889_01 | -0.084    | -0.311    | -0.276 | 0.003  | 0.039     | -0.099 | -0.076    | -0.066 |
| A004891_01 | -0.036    | -0.021    | 0.281  | -0.397 | 0.079     | 0.018  | 0.106     | 0.094  |
| A004894_01 | 0.199     | 0.189     | 0.446  | 0.497  | 0.063     | 0.022  | 0.535     | 0.321  |
| A004896_01 | 0.17      | 0.396     | -0.039 | -0.022 | -0.04     | -0.008 | 0.1       | 0.115  |
| A004901_01 | -0.142    | 0.04      | -0.422 | -0.283 | 0.007 NA  |        | 0.125     | -0.041 |
| A004903_01 | 0.009     | 0.187     | 0.559  | -0.167 | 0.087     | 0.086  | 0.013     | -0.042 |
| A004908_01 | 0.62      | 0.669     | 0.233  | -0.589 | 0.104     | 0.493  | 0.181     | 0.074  |
| A004910_01 | 0.001     | 0.247     | -0.432 | 0.046  | -0.155    | -0.064 | -0.271    | -0.1   |
| A004915_01 | 0.114     | 0.001     | -0.086 | -0.407 | 0.19      | 0.265  | -0.207    | -0.324 |

|            |           |        |        |           |           |          |           |        |
|------------|-----------|--------|--------|-----------|-----------|----------|-----------|--------|
| A004916_01 | -0.221    | -0.074 | -0.133 | -0.503    | 0.084     | 0.133    | -0.067 NA |        |
| A004918_01 | -0.037    | 0.069  | -0.527 | -0.162    | -0.121    | -0.268   | -0.264    | -0.284 |
| A004921_01 | 0.282     | 0.365  | 0.267  | 0.261     | 0.609     | 0.719    | 0.102     | 0.092  |
| A004922_01 | -0.289    | -0.089 | 0.097  | 0.079     | -0.122 NA |          | -0.099 NA |        |
| A004927_01 | -0.435    | -0.335 | -0.142 | 0.263     | -0.143    | -0.342   | -0.235    | 0.013  |
| A004931_01 | -0.942    | -1.079 | -0.852 | -0.664    | -0.462    | -0.567   | -0.586    | -0.445 |
| A004932_01 | -0.889    | -0.971 | -0.951 | -0.306    | -0.542    | -0.432   | -0.64     | -0.338 |
| A004934_01 | -0.369    | -0.202 | 0.354  | -0.056    | 0.264     | 0.277    | -0.183    | -0.095 |
| A004941_01 | -0.196    | -0.005 | -0.107 | -0.121    | -0.027    | 0.06     | -0.152    | -0.023 |
| A004944_01 | -0.263    | -0.08  | -0.047 | 0.256     | 0.301     | 0.335    | 0.042     | 0.143  |
| A004948_01 | 0.198     | -0.004 | -0.082 | 0.056     | 0.083     | 0.105 NA |           | -0.119 |
| A004962_01 | 0.089     | 0.197  | 0.298  | 0.151     | 0.133     | 0.052    | 0.277     | 0.216  |
| A004978_01 | -0.288    | -0.18  | -0.253 | 0.389     | 0.054     | -0.072   | -0.398    | -0.078 |
| A004994_01 | -0.397    | -0.179 | 0.146  | -0.125    | -0.543    | -0.215   | 0.146     | 0.388  |
| A005002_01 | 0.142     | 0.101  | -0.046 | -0.002    | -0.102    | -0.294   | 0.023     | -0.047 |
| A005005_01 | 0.536     | 0.495  | -0.18  | 0.144     | -0.282    | -0.287   | -0.235    | -0.316 |
| A005009_01 | 0.218     | 0.516  | 0.143  | 0.202     | -0.081    | 0.302    | -0.177    | -0.063 |
| A005012_01 | -0.192    | -0.559 | -0.031 | 0.305     | -0.601    | -1.012   | 0.41      | 0.425  |
| A005018_01 | -0.163    | -0.083 | 0.467  | -0.302    | -0.004    | 0.006    | 0.012     | 0.233  |
| A005022_01 | -0.102    | -0.06  | -0.37  | 0.265     | 0.029     | 0.046    | -0.021    | 0.054  |
| A005023_01 | 0.396     | 0.59   | -0.107 | -0.979    | 0.115     | 0.184    | 0.084     | 0.07   |
| A005029_01 | -0.375    | -0.339 | -0.241 | 0.586     | -0.073    | -0.119   | -0.22     | -0.341 |
| A005042_01 | -0.614    | -0.515 | -0.418 | -0.91     | -0.006    | 0.158    | -0.159    | 0.114  |
| A005048_01 | -0.567    | -0.028 | 0.079  | -0.091    | -0.258    | -0.017   | -0.216    | 0.221  |
| A005065_01 | -0.068    | -0.322 | -0.234 | -0.271    | 0.151     | 0.174    | -0.128    | -0.149 |
| A005067_01 | 0.187     | 0.221  | -0.149 | -0.2      | 0.041     | 0.161    | 0.087     | 0.118  |
| A005068_01 | -0.401    | -0.343 | -0.253 | -0.107    | -0.226    | -0.244   | 0.086     | 0.121  |
| A005069_01 | 0.561     | 0.763  | 0.695  | 1.291     | -0.579    | -0.705   | -0.217    | -0.02  |
| A005075_01 | 0.614     | 0.763  | 1.089  | 1.291     | -0.236    | -0.532   | -0.499 NA |        |
| A005084_01 | -0.146    | -0.261 | -0.364 | -0.087    | 0.032     | -0.024   | -0.137    | -0.146 |
| A005086_01 | 0.02      | 0.257  | -0.3   | -0.974    | -0.026    | 0.468    | 0.079     | 0.218  |
| A005093_01 | 0.325     | 0.141  | -0.271 | 0.148     | -0.063    | 0.191    | -0.131    | -0.011 |
| A005095_01 | -0.076 NA |        | -0.221 | 0.265     | -0.036 NA |          | -0.105    | -0.034 |
| A005097_01 | -0.299    | -0.164 | 0.351  | -0.03     | -0.051    | -0.067   | -0.238    | -0.104 |
| A005122_01 | 0.144     | 0.202  | 0.185  | -0.132    | 0.122     | 0.108    | 0.058     | -0.033 |
| A005126_01 | 0.37      | 0.63   | 0.119  | -0.79     | 0.091     | 0.419    | 0.071     | 0.109  |
| A005129_01 | 0.015     | 0.06   | -0.367 | -0.128    | -0.404    | -0.34    | 0.176     | 0.192  |
| A005132_01 | -0.021    | -0.141 | 0.427  | -0.145    | 0.182     | 0.09     | 0.163     | 0.089  |
| A005145_01 | 0.114     | 0.04   | 0.334  | 0.426     | -0.185    | -0.322   | 0.162     | 0.174  |
| A005146_01 | -0.257    | -0.166 | 0.18   | 0.023     | -0.097    | -0.231   | 0.032     | 0.219  |
| A005155_01 | 0.723     | 1.236  | 1.887  | 1.954     | 1.402     | 1.62     | 0.185     | 0.473  |
| A005160_01 | 0.07      | 0.093  | 0.074  | 0.236     | -0.118    | 0.11     | 0.126     | 0.191  |
| A005162_01 | 0.177     | 0.106  | 0.156  | 0.304     | 0.207     | 0.116    | -0.161    | -0.18  |
| A005163_01 | -0.229    | -0.151 | -0.202 | 0.048     | 0.224     | 0.115    | 0.013     | 0.018  |
| A005164_01 | -0.588    | -1.036 | -0.568 | -0.614    | -0.388    | -0.441   | -0.229    | -0.363 |
| A005167_01 | -0.07     | 0.102  | 0.332  | 0.001     | -0.058    | -0.052   | 0.044     | 0.252  |
| A005171_01 | 0.169     | 0.104  | -0.026 | 0.075     | -0.04     | 0.107    | 0.236     | 0.124  |
| A005173_01 | 0.254     | 0.143  | 0.194  | 0.026     | 0.073     | -0.047   | -0.1      | -0.07  |
| A005175_01 | -0.711    | -0.469 | -0.253 | -0.448    | -0.411    | -0.287   | -0.177    | 0.008  |
| A005176_01 | -2.93     | -3.316 | -4.837 | -4.617    | -2.776    | -3.524   | -3.561    | -2.593 |
| A005178_01 | -0.483    | -0.263 | -0.015 | -0.102    | -0.38     | -0.28    | -0.041    | 0.105  |
| A005179_01 | 0.199     | 0.155  | 0.12   | -0.059    | 0.293     | 0.186    | 0.497     | 0.276  |
| A005180_01 | -0.31     | -0.286 | -0.125 | -0.229    | -0.241    | -0.213   | -0.012    | 0.05   |
| A005182_01 | 0.019     | -0.217 | 0.375  | 0.268     | -0.028    | -0.222   | 0.044     | 0.209  |
| A005187_01 | -0.017    | 0.018  | 0.065  | 0.07      | 0.215     | 0.163    | 0.124     | 0.051  |
| A005188_01 | 0.118     | 0.177  | 0.151  | 0.343     | 0.017     | 0.093    | 0.059     | 0.021  |
| A005190_01 | -0.235 NA |        | -0.255 | -0.344 NA | NA        |          | -0.081    | -0.138 |
| A005195_01 | -0.704    | -0.746 | -0.346 | -0.275    | -0.511    | -0.54    | -0.123    | -0.173 |
| A005196_01 | -0.094 NA | NA     |        | -0.313    | 0.134 NA  |          | -0.223 NA |        |
| A005197_01 | -0.667    | -0.783 | -0.278 | 0.028     | -0.032    | -0.143   | -0.024    | 0.085  |
| A005199_01 | 0.003     | 0.014  | 0.257  | 0.296     | 0.262     | 0.06     | 0.061     | 0.071  |
| A005203_01 | -0.297    | 0.032  | -0.253 | -0.225    | -0.021    | 0.016    | -0.314    | -0.029 |
| A005204_01 | -0.502    | -0.601 | -0.234 | -0.607    | -0.189    | -0.464   | -0.067    | -0.13  |
| A005208_01 | 1.226     | 1.175  | 1.358  | 1.422     | 0.303     | 0.241    | 0.712     | 0.507  |
| A005209_01 | 0.384     | 0.5    | 0.139  | -0.27     | 0.142 NA  |          | 0.329     | 0.409  |
| A005211_01 | -0.145    | 0.184  | -0.071 | 0.622     | -0.36     | -0.256   | -0.281    | -0.14  |
| A005214_01 | 0.623     | 0.427  | 0.975  | 0.584     | 0.33      | 0.095    | -0.228 NA |        |
| A005220_01 | -0.635    | -0.217 | 0.105  | 0.062     | -0.347    | 0.016    | -0.267    | 0.141  |

|            |           |           |           |          |           |        |           |        |
|------------|-----------|-----------|-----------|----------|-----------|--------|-----------|--------|
| A005223_01 | -0.365    | -0.504    | -0.186    | 0.427    | -0.361    | -0.804 | -0.196    | -0.188 |
| A005224_01 | 0.005 NA  |           | -0.154    | -0.446   | 0.064 NA  |        | 0.428     | 0.463  |
| A005227_01 | 0.045     | 0.067     | 0.109     | -0.467   | -0.112    | -0.009 | -0.008    | 0.045  |
| A005234_01 | -0.265    | -0.188 NA |           | 0.03     | -0.012    | 0.005  | -0.413 NA |        |
| A005236_01 | -0.153    | -0.05     | -0.049 NA |          | -0.004    | -0.144 | -0.107 NA |        |
| A005239_01 | -0.108    | -0.134 NA |           | 0.017    | 0.075     | -0.063 | 0.077     | -0.037 |
| A005246_01 | 0.541     | 0.842     | 1.095     | 0.761    | 0.636     | 1.003  | 0.778     | 0.957  |
| A005247_01 | 0.267     | 0.295     | 0.155     | 0.059    | 0.132     | 0.085  | 0.084     | -0.033 |
| A005249_01 | -0.112    | -0.064    | -0.208    | -0.305   | -0.23     | 0.137  | -0.13     | -0.055 |
| A005251_01 | -0.092 NA |           | -0.191    | 0.236    | 0.177 NA  |        | 0.088     | 0.224  |
| A005260_01 | 0.139     | 0.207     | 0.155     | -0.038   | -0.14     | -0.382 | -0.205    | -0.297 |
| A005262_01 | -0.323    | -0.127    | 0.183     | 0.17     | -0.195    | -0.302 | -0.01     | 0.284  |
| A005267_01 | 0.386     | 0.487     | 0.067     | -0.935   | 0.384     | 0.579  | 0.346     | 0.249  |
| A005278_01 | 0.124     | 0.361     | 0.003     | -0.311   | 0.097     | 0.146  | -0.008    | 0.014  |
| A005279_01 | -0.177    | -0.229    | -0.082    | 0.173    | -0.443    | -0.316 | 0.12      | 0.302  |
| A005302_01 | -0.112    | -0.245    | -0.228    | -0.352   | 0.064 NA  |        | 0.072 NA  |        |
| A005305_01 | -0.397    | -0.178    | -0.38     | -0.029   | 0.162     | 0.132  | 0.06      | 0.055  |
| A005310_01 | -1.468    | -0.721 NA |           | -0.299   | -0.722    | 0.014  | -0.584    | 0.263  |
| A005332_01 | 0.119     | -0.03     | -0.023    | -0.215   | 0.084     | 0.088  | 0.06      | -0.033 |
| A005335_01 | 0.28      | 0.154     | -0.126    | 0.363    | 0.423     | 0.429  | 0.437     | 0.293  |
| A005338_01 | -0.29     | -0.362    | 0.053     | 0.091    | -0.42     | -0.31  | 0.057     | 0.045  |
| A005346_01 | -0.006    | 0.024     | -0.113    | 0.069    | -0.028 NA |        | 0.121     | 0.248  |
| A005354_01 | 0.592 NA  |           | 0.304     | 1.031 NA | NA        |        | -0.356    | -0.109 |
| A005356_01 | -0.857    | -0.887    | -1.021    | -0.297   | -0.271    | -0.49  | -0.29     | -0.102 |
| A005357_01 | 0.115     | -0.033    | 0.108     | -0.693   | 0.261     | 0.156  | 0.077     | 0.028  |
| A005366_01 | 0.735     | 0.881     | -0.03     | -1.023   | 0.417     | 1.003  | 0.254     | 0.344  |
| A005367_01 | 0.028     | -0.018    | -0.127    | 0.059    | 0.002     | -0.095 | -0.015    | 0.024  |
| A005368_01 | -0.125    | -0.136    | 0.216     | 0.159    | -0.102    | -0.375 | -0.137    | -0.15  |
| A005371_01 | -0.46     | 0.059     | -0.112    | -0.117   | -0.15     | -0.089 | -0.159    | -0.047 |
| A005376_01 | -0.192    | 0.063     | -0.153    | 0.467    | -0.155 NA |        | -0.266    | 0.052  |
| A005377_01 | -2.076    | -1.576    | -1.546    | -0.876   | -1.526    | -1.029 | -0.787    | -0.349 |
| A005384_01 | -0.284    | -0.211    | 0.218     | 0.631    | -0.467    | -0.499 | -0.354    | -0.114 |
| A005386_01 | -0.434    | -0.177    | -0.295    | -0.155   | -0.001    | -0.17  | -0.119    | -0.05  |
| A005389_01 | 0.348     | 0.516     | 0.468     | 0.64     | -0.025 NA |        | -0.069    | 0.076  |
| A005390_01 | 0.175     | 0.075     | -0.05     | 0.334    | 0.043     | -0.461 | -0.434    | -0.348 |
| A005391_01 | 0.048     | -0.025    | -0.048    | 0.248    | -0.167    | -0.051 | -0.08 NA  |        |
| A005394_01 | 0.077     | -0.053    | 0.363     | 0.269    | -0.236    | -0.457 | -0.066    | -0.158 |
| A005395_01 | 0.184     | 0.108     | 0.032     | 0.259    | 0.215     | -0.071 | 0.031     | 0.015  |
| A005401_01 | 0.127     | -0.044    | -0.586    | -0.073   | 0.13      | 0.213  | 0.034     | 0.004  |
| A005403_01 | 0.865     | 0.689     | 0.553     | 0.041    | 0.271     | 0.346  | -0.001    | -0.156 |
| A005407_01 | 0.014     | -0.318    | -0.2      | -0.314   | 0.345     | 0.072  | 0.022     | -0.151 |
| A005410_01 | -0.694    | -0.781    | -1.005    | -0.529   | -0.098    | -0.433 | -0.464    | -0.497 |
| A005411_01 | -0.576    | -0.064    | 0.265     | -0.062   | -0.289    | -0.159 | -0.254    | -0.02  |
| A005413_01 | 0.073     | 0.264     | 0.276     | -0.138   | -0.054    | 0.075  | -0.15     | 0.129  |
| A005414_01 | 0.088     | 0.204     | -0.016    | 0.172    | 0.061     | 0.107  | 0.135     | 0.076  |
| A005416_01 | -0.366    | -0.174    | -0.039    | -0.225   | -0.019    | -0.146 | -0.02     | 0.033  |
| A005417_01 | -0.052    | -0.057    | -0.419    | 0.147    | 0.102     | 0.183  | -0.398    | -0.26  |
| A005426_01 | -0.353    | -0.375    | -0.296    | 0.12     | 0.311     | 0.325  | 0.124     | 0.191  |
| A005431_01 | 0.019     | 0.268     | 0.057     | 0.262    | -0.008    | 0.132  | -0.117 NA |        |
| A005434_01 | 0.749     | 0.441     | 0.515     | 0.677    | 0.3       | 0.386  | 0.448     | 0.136  |
| A005439_01 | 0.331     | 0.305     | -0.149    | -0.158   | 0.377     | 0.319  | -0.1      | -0.085 |
| A005477_01 | -0.316    | 0.238     | 0.306     | 0.614    | 0.247     | 0.395  | 0.137     | 0.329  |
| A005500_01 | 0.174     | 0.109     | -0.09     | 0.159    | 0.091     | -0.13  | 0.073     | -0.062 |
| A005506_01 | 0.359     | 0.268     | 0.147     | 0.156    | 0.052     | -0.021 | -0.09     | -0.016 |
| A005518_01 | -0.226    | -0.11     | 0.037     | 0.239    | 0.074     | -0.02  | 0.007     | 0.07   |
| A005521_01 | 0.207     | 0.286     | -0.24     | -0.51    | 0.079     | 0.043  | -0.181    | -0.2   |
| A005522_01 | -0.148    | -0.076    | 0.282     | 0.214    | -0.331    | -0.357 | -0.001    | 0.181  |
| A005526_01 | -0.178    | -0.281    | -0.102    | 0.235    | 0.173     | -0.05  | 0.048 NA  |        |
| A005532_01 | 0.613     | 0.698     | 0.472     | 0.517    | 0.032     | 0.096  | 0.226     | 0.081  |
| A005542_01 | 0.224     | 0.177     | -0.009    | 0.581    | 0.03      | -0.05  | -0.146    | -0.144 |
| A005552_01 | -0.734    | 0.474 NA  | NA        |          | -0.573    | 0.029  | -0.193    | 0.783  |
| A005553_01 | 0.339     | 0.074     | -0.006    | 0.006    | 0.115     | 0.168  | 0.176     | 0.071  |
| A005557_01 | -0.09     | -0.214    | -0.142    | -0.257   | 0.086     | 0.031  | 0.033 NA  |        |
| A005558_01 | -0.644    | -0.51     | -0.314    | 0.081    | -0.472    | -0.272 | -0.185    | 0.247  |
| A005562_01 | 0.233     | 0.198     | 0.217     | -0.586   | -0.124    | -0.059 | -0.161    | 0.002  |
| A005564_01 | 0.417     | 0.567     | 0.198     | -0.264   | 0.025     | 0.386  | -0.03     | -0.033 |
| A005571_01 | 0.387     | 0.128     | 0.136     | 0.715    | -0.043    | -0.155 | 0.076     | -0.02  |
| A005576_01 | 0.392     | 0.192     | 0.64      | 1.03     | -0.501    | -1.068 | -0.38     | -0.288 |

|            |          |           |        |        |           |        |           |        |
|------------|----------|-----------|--------|--------|-----------|--------|-----------|--------|
| A005577_01 | -0.332   | 0.003     | 0.074  | -0.113 | -0.014    | 0.134  | -0.257    | 0.056  |
| A005583_01 | 0.039    | -0.067    | -0.249 | -0.003 | 0.377     | 0.349  | -0.308    | -0.223 |
| A005588_01 | -0.819   | -0.507 NA |        | 0.026  | -0.16     | -0.42  | -0.445    | -0.227 |
| A005589_01 | -0.57    | -0.432    | -0.114 | -0.042 | -0.256    | -0.279 | -0.457    | -0.222 |
| A005590_01 | -0.191   | 0.186     | 0.486  | 0.539  | -0.316    | -0.206 | -0.002    | 0.29   |
| A005591_01 | 0.074    | -0.053    | -0.34  | 0.225  | 0.247     | 0.097  | 0.161     | 0.089  |
| A005592_01 | -1.175   | -0.595    | -0.911 | -0.251 | -0.172    | 0.075  | 0.215     | 0.142  |
| A005594_01 | 0.059    | -0.055    | 0.35   | 0.051  | 0.147     | -0.035 | 0.02      | -0.005 |
| A005600_01 | -0.572   | -0.497 NA |        | -0.001 | -0.284    | -0.472 | -0.461 NA |        |
| A005601_01 | -0.882   | -0.541    | -0.129 | -0.025 | -0.32     | -0.446 | -0.464    | -0.269 |
| A005609_01 | -0.326   | -0.189    | -0.355 | -0.182 | -0.012    | -0.135 | -0.021    | 0.227  |
| A005613_01 | 0.271    | 0.201     | -0.366 | -0.163 | 0.088     | 0.297  | 0.024     | 0.026  |
| A005615_01 | 0.079    | 0.466     | 0.336  | 0.343  | 0.135     | -0.031 | 0.313     | 0.384  |
| A005616_01 | -0.453   | -0.027    | 0.228  | -0.165 | -0.38     | -0.084 | -0.232    | 0.136  |
| A005620_01 | -0.485   | -0.555    | -0.013 | -0.158 | -0.465    | -0.335 | 0.097     | 0.206  |
| A005629_01 | 0.49     | 0.558     | -0.18  | 0.527  | 0.33      | 0.238  | -0.003    | -0.089 |
| A005636_01 | -0.01    | 0.114     | 0.067  | 0.201  | 0.008     | 0.159  | -0.215    | 0.23   |
| A005646_01 | 0.496    | 0.394     | 0.32   | 0.366  | 0.076     | 0.031  | -0.026    | -0.071 |
| A005648_01 | -1.779   | -1.688    | -0.294 | -0.621 | -0.327    | -0.364 | 0.098     | -0.078 |
| A005655_01 | 0.2      | 0.093     | 0.112  | -0.068 | 0.201     | -0.019 | 0.034     | 0.002  |
| A005659_01 | 0.402    | 0.52      | 0.232  | 0.027  | 0.047     | 0.032  | -0.069    | 0.008  |
| A005661_01 | -1.712   | -2.123    | -1.023 | -0.571 | -2.313    | -3.075 | -2.701    | -1.948 |
| A005677_01 | -0.194   | -0.01     | 0.522  | 0.28   | -0.007    | -0.012 | 0.264     | 0.206  |
| A005680_01 | -0.153   | -0.346    | -0.351 | 0.433  | -0.211    | -0.561 | -0.254    | -0.197 |
| A005687_01 | -1.601   | -1.659    | -1.304 | -0.906 | -0.977    | -0.869 | -0.688    | -0.575 |
| A005688_01 | -0.243   | 0.208     | 0.333  | 0.038  | -0.098    | 0.081  | -0.007    | 0.345  |
| A005690_01 | -0.189   | -0.019    | 0.218  | -0.168 | 0.045     | 0.056  | -0.025    | 0.074  |
| A005692_01 | -0.19 NA |           | -0.386 | -0.373 | -0.303 NA |        | -0.141    | 0.054  |
| A005695_01 | -1.691   | -1.748    | -0.95  | -0.905 | -0.155    | -0.098 | 0.078     | 0.039  |
| A005699_01 | 0.047    | 0.13      | 0.351  | 0.215  | -0.164    | -0.359 | 0.283     | 0.233  |
| A005701_01 | 0.555    | 0.444     | -0.183 | -0.089 | -0.095    | 0.151  | -0.224    | -0.103 |
| A005702_01 | 0.317    | 0.305     | 0.045  | 0.598  | -0.193    | -0.322 | -0.46 NA  |        |
| A005703_01 | 0.359    | 0.347     | -0.225 | -0.212 | 0.083     | 0.197  | -0.269    | -0.084 |
| A005706_01 | -0.423   | -0.369    | -0.158 | -0.139 | -0.202    | -0.322 | -0.047    | -0.01  |
| A005707_01 | -0.791   | -0.567    | -0.294 | -0.178 | -0.44     | -0.566 | -0.257    | -0.108 |
| A005708_01 | -0.61    | -0.72     | -0.356 | 0.05   | -0.338    | -0.497 | -0.266    | -0.071 |
| A005709_01 | -0.654   | -0.659    | -0.312 | -0.048 | -0.486    | -0.61  | -0.236    | -0.115 |
| A005710_01 | -0.233   | -0.069    | -0.511 | 0.111  | 0.017     | -0.11  | -0.462 NA |        |
| A005712_01 | -0.254   | -0.451    | -0.115 | 0.014  | -0.301    | -0.526 | 0.302     | 0.151  |
| A005713_01 | 0.298    | 0.22      | 0.129  | 0.594  | -0.197    | -0.443 | -0.232    | -0.116 |
| A005714_01 | 0.745    | 0.555     | 0.591  | 1.056  | -0.438    | -0.846 | -0.3      | -0.36  |
| A005715_01 | -0.282   | -0.251    | -0.482 | 0.075  | -0.295    | -0.439 | -0.364    | 0.027  |
| A005718_01 | -0.664   | -0.607    | -0.278 | -0.4   | -0.321    | -0.579 | -0.236    | -0.131 |
| A005719_01 | -0.25    | -0.076    | -0.043 | 0.232  | -0.167    | -0.244 | -0.01     | 0.096  |
| A005720_01 | -1.081   | -1.074    | -0.157 | -0.062 | -0.79     | -0.986 | -0.319    | -0.349 |
| A005721_01 | -0.612   | -0.774    | -0.149 | 0.039  | -0.478    | -0.651 | -0.267    | -0.27  |
| A005722_01 | -0.117   | 0.035     | 0.066  | 0.377  | -0.269    | -0.437 | -0.18 NA  |        |
| A005723_01 | -0.075   | -0.143    | -0.141 | 0.494  | -0.182    | -0.304 | -0.137 NA |        |
| A005725_01 | -0.05    | -0.13     | -0.395 | 0.156  | 0.096     | -0.089 | -0.137    | -0.116 |
| A005726_01 | -0.252   | -0.45     | 0.032  | 0.263  | -0.453    | -0.536 | -0.173    | -0.116 |
| A005727_01 | 1.539    | 1.794     | 1.354  | 1.494  | 0.802     | 1.036  | 0.781     | 0.899  |
| A005729_01 | -1.062   | -0.695    | -0.08  | -0.05  | -0.432    | -0.153 | -0.657    | -0.276 |
| A005730_01 | -0.802   | -0.81     | 0.013  | 0.331  | -0.926    | -1.222 | -0.261    | -0.192 |
| A005731_01 | -0.957   | -0.803    | -0.207 | -0.098 | -0.498    | -0.644 | -0.356    | -0.094 |
| A005732_01 | -0.09    | 0.059     | 0.095  | 0.298  | -0.242    | -0.208 | -0.08     | 0.214  |
| A005733_01 | -0.564   | -1.014    | -0.487 | -1.102 | -0.589    | -1.001 | -0.024    | 0.005  |
| A005736_01 | -0.247   | -0.445    | -0.05  | -0.323 | 0.05      | -0.11  | -0.211    | -0.171 |
| A005739_01 | 0.172    | 0.223     | 0.528  | 0.398  | 0.139     | 0.201  | 0.353     | 0.3    |
| A005740_01 | -0.515   | -0.137    | -0.134 | 0.017  | -0.009    | 0.138  | -0.459 NA |        |
| A005741_01 | -0.118   | 0.065     | -0.198 | 0.024  | -0.073    | 0.255  | 0.061     | -0.015 |
| A005742_01 | -0.116   | 0.016     | 0.217  | -0.148 | -0.254    | -0.294 | -0.039    | 0.073  |
| A005743_01 | -0.024   | -0.08     | 0.083  | 0.277  | 0.314     | 0.208  | -0.096    | -0.088 |
| A005744_01 | -0.204   | -0.299    | -0.274 | -0.234 | 0.013     | 0.066  | -0.044    | -0.058 |
| A005745_01 | -0.291   | -0.378    | -0.185 | 0.076  | -0.145    | -0.412 | -0.237    | -0.176 |
| A005746_01 | 0.121    | 0.147     | -0.521 | 0.188  | -0.205    | -0.161 | -0.483    | -0.427 |
| A005749_01 | 0.156    | 0.206     | 0.055  | 0.325  | 0.302     | 0.455  | 0.531     | 0.446  |
| A005750_01 | -0.263   | -0.249 NA |        | 0.148  | 0.194     | 0.063  | -0.262    | -0.035 |
| A005751_01 | -0.622   | -0.575    | -0.351 | -0.422 | 0.44      | 0.537  | -0.105    | 0.032  |

|            |           |           |          |        |           |          |          |        |
|------------|-----------|-----------|----------|--------|-----------|----------|----------|--------|
| A005754_01 | -0.807    | -0.726    | -0.632   | 0.061  | -0.609    | -0.954   | -0.58    | -0.129 |
| A005755_01 | -0.752    | -0.678    | -0.281   | 0.212  | -0.335    | -0.435   | 0.058    | 0.251  |
| A005763_01 | -0.845 NA |           | -0.265   | -0.121 | 0.353     | 0.425    | -0.11    | 0.054  |
| A005766_01 | -0.213    | 0.024     | 0.185    | -0.139 | -0.217    | -0.31    | 0.05     | 0.125  |
| A005771_01 | 0.266     | 0.307     | -0.069   | 0.328  | -0.001    | -0.292   | -0.332   | -0.106 |
| A005782_01 | 0.255     | 0.233 NA  |          | 0.58   | 0.099 NA  |          | -0.25 NA |        |
| A005783_01 | 1.055     | 1.138     | 0.211    | 0.261  | -0.329 NA |          | -0.194   | -0.241 |
| A005784_01 | -0.367    | -0.283    | -0.251   | -0.053 | -0.049 NA |          | 0.15     | 0.101  |
| A005787_01 | -0.563    | -0.438    | -0.106   | -0.175 | -0.519    | -0.577   | -0.506   | -0.205 |
| A005792_01 | -0.223    | -0.238    | -0.409   | 0.016  | 0.01      | -0.009   | -0.263   | -0.134 |
| A005827_01 | -1.305    | -1.244    | -0.361   | -0.126 | -0.561    | -0.388   | -0.372   | -0.167 |
| A005834_01 | -0.357    | -0.013    | 0.049    | 0.263  | 0.047     | 0.15     | -0.044   | 0.1    |
| A005835_01 | 0.73      | 0.854     | 0.337    | -0.146 | 0.543     | 0.901    | 0.318    | 0.282  |
| A005839_01 | -0.521    | -0.432    | -0.202   | -0.305 | -0.174    | 0.014    | -0.187   | -0.011 |
| A005845_01 | 0.529     | 0.463     | 0.99     | 1.228  | 0.612     | 0.699    | 0.344    | 0.146  |
| A005846_01 | -0.201    | -0.104    | 0.002    | -0.036 | -0.019    | 0.061    | -0.145   | 0.042  |
| A005856_01 | -0.367    | -0.352    | -0.485   | 0.071  | -0.224    | -0.42    | -0.159   | -0.045 |
| A005864_01 | -0.132    | -0.235    | -0.527   | 0.069  | -0.132    | -0.146   | 0.14     | 0.119  |
| A005869_01 | -0.173    | -0.098    | -0.158   | 0.09   | -0.023    | -0.087   | 0.091    | 0.245  |
| A005870_01 | -1.003    | -1.043    | -0.177   | -0.203 | -0.272    | -0.232   | -0.095   | -0.193 |
| A005879_01 | 0.399     | 0.479     | -0.066   | 0.261  | -0.046 NA |          | -0.171   | -0.051 |
| A005885_01 | 0.081     | 0.073     | -0.194   | 0.354  | -0.099    | -0.058   | -0.165   | -0.079 |
| A005906_01 | -0.637    | -0.516    | -0.039   | 0.116  | -0.015    | 0.035    | -1.058   | -0.704 |
| A005910_01 | -0.905    | -0.487    | 0.576    | 0.274  | -0.094    | 0.093    | 0.51     | 0.758  |
| A005911_01 | -0.054    | 0.183     | 0.382    | -0.025 | -0.228    | 0.045    | -0.155   | 0.1    |
| A005914_01 | -0.203    | -0.113    | -0.014   | -0.056 | 0.146     | 0.034    | -0.139   | 0.006  |
| A005915_01 | 0.313     | 0.413     | 0.07     | -0.484 | 0.116     | -0.127   | -0.024   | -0.031 |
| A005916_01 | 0.312     | 0.554     | 0.44     | 0.684  | 0.296     | 0.359    | 0.224    | 0.216  |
| A005926_01 | -0.129    | -0.224    | -0.083   | 0.155  | 0.108     | 0.03     | -0.083   | 0.025  |
| A005928_01 | -0.261    | -0.098    | -0.446   | 0.06   | -0.136    | 0.263    | -0.273   | 0.119  |
| A005930_01 | 0.243     | 0.111     | 0.013    | 0.017  | 0.078     | -0.069   | 0.041    | 0.154  |
| A005933_01 | 0.172     | 0.17      | -0.228   | -0.336 | -0.164    | 0.065    | -0.09    | -0.041 |
| A005935_01 | 0.217     | 0.219     | 0.216    | 0.061  | -0.206    | -0.075   | 0.146    | 0.276  |
| A005936_01 | 0.184     | 0.326     | 0.137    | -0.317 | 0.402     | 0.394    | -0.033   | 0.119  |
| A005938_01 | 0.377     | 0.306     | 0.423    | -0.48  | 0.202     | 0.124    | 0.14     | 0.104  |
| A005939_01 | -0.259    | -0.325    | -0.118   | 0.119  | 0.363     | 0.327    | -0.2     | -0.131 |
| A005946_01 | 0.619     | 0.51      | 0.786    | 0.83   | 0.198     | -0.034   | 0.7      | 0.394  |
| A005948_01 | -0.074    | 0.003     | 0.33     | 0.081  | 0.089     | 0.123    | -0.123   | -0.186 |
| A005949_01 | 0.26      | 0.551     | 0.599 NA |        | -0.047    | -0.043   | 0.384 NA |        |
| A005954_01 | 0.166     | 0.03      | -0.114   | -0.293 | 0.019     | 0.012    | -0.182   | -0.2   |
| A005955_01 | -0.008    | 0.279     | -0.003   | 0.155  | -0.107    | 0.141    | -0.171   | 0.257  |
| A005958_01 | 0.015     | -0.167    | 0.38     | 0.077  | 0.033     | 0.014    | 0.121    | 0.092  |
| A005959_01 | 0.034     | 0.132     | -0.318   | -0.584 | -0.157    | 0.132    | -0.59    | -0.333 |
| A005962_01 | 0.527     | 0.381     | 0.063    | -0.239 | 0.337     | 0.118    | -0.036   | -0.267 |
| A005963_01 | 0.663     | 0.71      | 0.585    | 0.348  | 0.029     | 0.205    | 0.167    | 0.242  |
| A005965_01 | -0.567    | -0.349    | 0.201    | 0.009  | -0.054    | 0.022    | -0.006   | 0.064  |
| A005969_01 | -0.097    | -0.163    | -0.408   | -0.337 | 0.041     | 0.107    | -0.002   | 0.076  |
| A005972_01 | -0.077    | -0.061    | 0.211    | 0.092  | 0.036     | -0.149   | 0.038    | 0.12   |
| A005981_01 | 0.042     | -0.258    | -0.043   | -0.373 | 0.328     | 0.226    | -0.226   | -0.126 |
| A005984_01 | -1.103    | -1.045    | -0.136   | 0.468  | -0.694    | -1.042   | 0.062    | 0.338  |
| A005989_01 | 0.469     | 0.182     | 0.087    | 0.112  | 0.2       | -0.147   | 0.299    | 0.005  |
| A005991_01 | -2.96     | -3.536    | -5.01    | -4.715 | -2.445    | -3.434   | -3.625   | -2.285 |
| A005992_01 | -0.307    | -0.17     | 0.013    | 0.107  | -0.083    | -0.164   | -0.122   | -0.138 |
| A005999_01 | -0.827    | -0.753    | -0.45    | 0.051  | -0.303    | -0.198   | -0.23    | -0.003 |
| A006003_01 | -0.221    | -0.156    | -0.141   | 0.05   | 0.074     | -0.013   | -0.04    | -0.014 |
| A006014_01 | 0.394     | 0.25 NA   |          | 0.14   | 0.205     | 0.439 NA |          | 0.091  |
| A006015_01 | 0.234     | -0.043    | -0.332   | -0.371 | -0.155    | -0.191   | -0.355   | -0.441 |
| A006017_01 | 0.59      | 0.235     | -0.058   | -0.01  | 0.074     | 0.051    | -0.137   | -0.202 |
| A006021_01 | 0.157     | 0.442     | 0.244    | -0.026 | 0.542     | 0.999    | -0.033   | -0.009 |
| A006022_01 | -0.345    | -0.395    | -0.145   | -0.206 | -0.19     | -0.022   | -0.043   | 0.167  |
| A006027_01 | -0.07     | 0.2       | 0.248    | 0.198  | -0.258    | 0.194    | -0.188   | 0.113  |
| A006030_01 | -1.126    | -1.255    | -0.966   | -0.434 | -0.254    | -0.159   | -0.217   | -0.056 |
| A006032_01 | 0.206     | 0.079     | 0.031    | -0.157 | -0.045    | -0.025   | 0.043    | 0.13   |
| A006033_01 | -0.453    | -0.48     | -0.694   | 0.143  | -0.348    | -0.386   | -0.333   | -0.215 |
| A006034_01 | 0.244     | 0.114     | -0.052   | 0.218  | -0.078    | 0.014    | 0.134    | 0.131  |
| A006035_01 | 0.02      | -0.028    | -0.062   | 0.002  | -0.172    | -0.307   | 0.089    | 0.104  |
| A006036_01 | 0.287 NA  |           | -0.264   | 0.318  | -0.142 NA |          | 0.059    | 0.02   |
| A006039_01 | -0.361    | -0.189 NA |          | -0.96  | -0.263    | -0.124   | -1.073   | -0.631 |

|            |           |           |        |          |           |        |           |        |
|------------|-----------|-----------|--------|----------|-----------|--------|-----------|--------|
| A006040_01 | -0.605    | -0.704    | -0.41  | -0.139   | -0.211    | -0.626 | -0.082    | -0.106 |
| A006041_01 | -0.157    | -0.334    | -0.373 | 0.22     | -0.382    | -0.851 | -0.53     | -0.341 |
| A006042_01 | -0.336    | -0.536    | -0.084 | 0.079    | -0.121    | -0.142 | -0.015    | -0.153 |
| A006043_01 | -0.702    | -0.677    | -0.261 | 0.029    | -0.001    | 0.114  | -0.098    | 0.028  |
| A006045_01 | 0.263     | 0.342     | -0.183 | 0.235    | 0.028     | 0.161  | -0.133    | -0.08  |
| A006046_01 | -1.088    | -1.035    | -0.208 | 0.222    | 0.052     | 0.288  | 0.077     | 0.268  |
| A006048_01 | 0.116     | 0.258     | -0.046 | -0.631   | -0.155    | 0.143  | -0.149    | 0.118  |
| A006049_01 | 0.727     | 0.594     | 0.81   | 1.198    | -0.401    | -0.653 | 0.331     | 0.298  |
| A006050_01 | 0.019     | -0.16     | 0.006  | -0.335   | -0.03     | -0.082 | -0.004    | -0.067 |
| A006051_01 | 0.894     | 0.773     | -0.304 | -0.147   | 0.039     | 0.389  | -0.135    | -0.005 |
| A006052_01 | -0.3      | -0.112    | 0.204  | 0.094    | -0.225    | -0.371 | 0.063     | 0.431  |
| A006055_01 | -0.018    | -0.156    | 0.095  | 0.258    | -0.019    | -0.023 | -0.152    | -0.22  |
| A006056_01 | -0.415    | -0.472    | 0.215  | -0.004   | 0.127     | 0.312  | 0.231     | 0.214  |
| A006058_01 | 0.213     | 0.065     | -0.743 | -0.37    | -0.012    | -0.022 | -0.139    | -0.202 |
| A006059_01 | -0.168    | -0.125    | -0.307 | 0.416    | -0.085    | -0.061 | -0.081    | 0.103  |
| A006060_01 | 0.052     | 0.114     | 0.274  | -0.349   | -0.026    | 0.178  | 0.085     | 0.127  |
| A006063_01 | 0.731     | 0.768     | 0.821  | 1.174    | -0.142    | 0.059  | 0.41      | 0.353  |
| A006066_01 | -0.442    | -0.303    | -0.065 | 0.231    | -0.183    | -0.495 | -0.205 NA |        |
| A006068_01 | 0.283     | 0.09      | -0.006 | -0.086   | -0.409    | -0.693 | -0.614    | -0.532 |
| A006070_01 | 0.33      | 0.371     | 0.297  | 0.838    | -0.249    | -0.49  | -0.099    | 0.327  |
| A006073_01 | -0.292    | -0.235    | -0.696 | 0.376    | 0.182     | 0.177  | -0.122 NA |        |
| A006077_01 | 0.119     | 0.118     | 0.014  | -0.384   | 0.181     | 0.24   | 0.085     | 0.231  |
| A006078_01 | -0.08     | -0.164    | 0.066  | 0.092    | 0.071     | -0.118 | 0.111     | -0.021 |
| A006079_01 | 0.042     | 0.184     | -0.1   | 0.164    | -0.312    | -0.205 | -0.367    | -0.303 |
| A006082_01 | 0.012     | -0.015    | 0.12   | 0.189    | -0.13     | -0.397 | 0.02      | 0.006  |
| A006085_01 | 0.225     | 0.479     | 0.561  | 0.151    | 0.308     | 0.608  | 0.211 NA  |        |
| A006087_01 | 1.165     | 1.311     | 0.522  | 0.534    | 0.708     | 1.013  | 0.354     | 0.292  |
| A006089_01 | -0.721    | -0.562    | -0.72  | -0.58    | -0.459    | -0.3   | -0.267    | -0.28  |
| A006090_01 | -0.127    | -0.115    | -0.198 | 0.481    | -2.295    | -2.332 | -2.08     | -1.567 |
| A006092_01 | 0.193 NA  |           | 0.38   | 0.057 NA | NA        |        | 0.299     | 0.205  |
| A006095_01 | 0.483     | 0.341     | -0.176 | -0.422   | 0.038     | 0.072  | -0.168    | -0.21  |
| A006096_01 | -0.19     | -0.353    | -0.21  | 0.301    | 0.13      | -0.094 | 0.218     | 0.276  |
| A006099_01 | 0.814     | 0.736     | 0.435  | 0.049    | 0.415     | 0.576  | 0.191     | 0.121  |
| A006100_01 | 0.221     | 0.142     | -0.153 | 0.199    | -0.389    | -0.614 | -0.84     | -0.655 |
| A006101_01 | -0.347    | -0.271    | -0.346 | -0.026   | -0.172    | -0.072 | -0.31     | -0.033 |
| A006102_01 | -0.737    | -0.853 NA |        | -1.073   | -0.267    | -0.533 | -0.147 NA |        |
| A006104_01 | 0.413     | -0.083    | 0.262  | -0.021   | 0.865     | 1.13   | 0.64      | 0.342  |
| A006105_01 | 0.07      | -0.111    | -0.48  | -1.032   | 0.201     | 0.215  | -0.243    | -0.378 |
| A006110_01 | -0.423    | -0.445    | -0.246 | 0.133    | -0.127    | -0.123 | 0.002     | 0.052  |
| A006118_01 | -0.001    | -0.061    | -0.14  | 0.164    | -0.061    | 0.202  | -0.009    | 0.092  |
| A006119_01 | -0.094    | 0.021     | -0.132 | 0.079    | 0.045     | -0.125 | -0.094    | -0.073 |
| A006123_01 | 0.081     | 0.157     | -0.098 | -0.501   | 0.164     | -0.044 | 0.006     | 0.021  |
| A006124_01 | -0.164    | -0.181    | -0.3   | -0.068   | -0.075    | 0.282  | 0.113     | 0.287  |
| A006125_01 | -0.296    | -0.575    | -0.056 | -0.292   | -0.078    | -0.307 | 0.002     | 0.011  |
| A006126_01 | -0.504    | -0.51     | -0.333 | 0.274    | -0.707    | -0.975 | -0.291    | -0.462 |
| A006132_01 | -0.323    | -0.126 NA |        | 0.078    | -0.003    | 0.006  | -0.084 NA |        |
| A006136_01 | -0.084    | -0.228    | -0.123 | 0.452    | -0.176 NA |        | -0.094 NA |        |
| A006138_01 | -0.422    | -0.423    | -0.329 | -0.001   | -0.273    | -0.075 | -0.183    | -0.038 |
| A006143_01 | -0.432    | -0.27     | 0.055  | -0.368   | -0.077    | -0.146 | -0.094    | -0.01  |
| A006146_01 | -0.099    | -0.153    | 0.124  | -0.373   | 0.045     | -0.103 | 0.133     | 0.077  |
| A006152_01 | 0.084     | -0.026    | 0.13   | -0.113   | 0.081     | -0.137 | 0.144     | 0.155  |
| A006159_01 | -0.26     | -0.255    | -0.559 | -0.181   | -0.29     | 0.017  | -0.238    | -0.062 |
| A006163_01 | -0.407    | -0.529    | -0.1   | -0.02    | -0.109    | -0.341 | -0.142    | -0.192 |
| A006164_01 | 0.095     | -0.064    | -0.341 | -0.082   | 0.067     | 0.012  | -0.092    | -0.049 |
| A006168_01 | 0.266     | 0.044     | 0.311  | 0.477    | 0.361     | 0.086  | 0.149     | -0.152 |
| A006169_01 | -0.209    | 0.139     | 0.314  | -0.041   | -0.669    | -0.163 | 0.07      | 0.383  |
| A006172_01 | 0.002     | 0.077     | 0.198  | -0.517   | -0.019    | 0.067  | 0.046     | 0.063  |
| A006173_01 | -0.012    | 0.093     | 0.029  | -0.003   | -0.127    | -0.097 | 0.047     | 0.067  |
| A006175_01 | -0.495    | -0.255    | 0.159  | 0.098    | -0.068    | 0.002  | -0.05 NA  |        |
| A006177_01 | -0.063 NA |           | -0.231 | -0.314   | 0.073 NA  |        | -0.288 NA |        |
| A006178_01 | -0.136    | -0.302    | 0.499  | 0.019    | -0.001    | -0.084 | 0.078     | -0.084 |
| A006181_01 | 0.849     | 0.556     | 0.822  | 0.896    | 0.35      | 0.308  | 0.259     | 0.155  |
| A006182_01 | -0.078    | -0.03     | -0.356 | 0.119    | 0.107     | 0.305  | 0.066     | 0.115  |
| A006185_01 | -0.459    | -0.224    | -0.409 | -0.414   | -0.15     | -0.028 | -0.224    | -0.08  |
| A006189_01 | 0.185     | 0.27      | 0.427  | 0.384    | 0.098     | 0.025  | -0.076    | -0.108 |
| A006191_01 | 0.414     | 0.355     | 0.366  | -0.13    | 0.28      | 0.327  | 0.182     | 0.19   |
| A006193_01 | -0.3      | -0.285    | -0.353 | -0.362   | 0.166     | -0.028 | -0.063    | -0.04  |
| A006195_01 | -0.497    | -0.38     | -0.938 | -0.553   | -0.434    | -0.461 | -0.524    | -0.224 |



|            |        |        |        |        |        |        |        |    |        |
|------------|--------|--------|--------|--------|--------|--------|--------|----|--------|
| A006197_01 | -1.723 | -1.608 | -1.312 | -0.725 | -1.747 | -1.61  | -0.601 | NA |        |
| A006199_01 | -0.271 | -0.222 | -0.008 | -0.045 | 0.093  | 0.271  | 0.021  |    | 0.127  |
| A006202_01 | 0.158  | -0.056 | 0.082  | 0.19   | -0.225 | -0.512 | 0.01   |    | -0.1   |
| A006203_01 | -0.505 | -0.306 | NA     | 0.137  | -0.377 | -0.32  | NA     | NA |        |
| A006211_01 | -0.334 | -0.256 | -0.44  | -0.519 | 0.002  | -0.045 | -0.322 |    | -0.075 |
| A006212_01 | -0.098 | 0.064  | 0.656  | 0.267  | 0.026  | 0.038  | -0.202 |    | -0.16  |
| A006214_01 | 0.244  | -0.019 | -0.87  | -1.093 | NA     | 0.338  | -1.01  |    | -0.73  |
| A006219_01 | -0.06  | -0.008 | NA     | NA     | 0.107  | 0.092  | NA     |    | 0.041  |
| A006220_01 | -0.189 | 0.047  | 0.154  | 0.141  | -0.099 | 0.035  | -0.069 |    | 0.02   |
| A006223_01 | -0.037 | 0.04   | -0.301 | 0.334  | 0.126  | NA     | -0.076 |    | -0.125 |
| A006226_01 | -0.237 | -0.105 | -0.026 | 0.418  | -0.171 | -0.345 | -0.009 |    | -0.011 |
| A006227_01 | 0.465  | 0.541  | 0.616  | 0.926  | 0.358  | 0.384  | 0.523  |    | 0.399  |
| A006231_01 | -0.039 | 0.08   | -0.015 | 0.23   | 0.078  | 0.287  | -0.034 |    | 0.061  |
| A006233_01 | -0.01  | 0.021  | 0.351  | 0.444  | -0.271 | NA     | -0.02  | NA |        |
| A006235_01 | -0.171 | -0.189 | -0.148 | 0.015  | 0.192  | 0.278  | -0.511 |    | -0.432 |
| A006239_01 | 0.356  | 0.493  | -0.073 | 0.158  | 0.13   | 0.41   | 0.114  |    | -0.072 |
| A006242_01 | -0.069 | 0.181  | 0.075  | 0.503  | -0.099 | NA     | 0.031  |    | -0.137 |
| A006243_01 | -0.001 | -0.111 | -0.566 | -0.017 | -0.173 | -0.04  | -0.073 |    | -0.087 |
| A006246_01 | 0.209  | 0.459  | 0.205  | -0.789 | 0.226  | 0.532  | 0.31   |    | 0.378  |
| A006251_01 | -0.019 | -0.096 | -0.027 | 0.114  | -0.23  | -0.325 | -0.111 | NA |        |
| A006252_01 | -0.451 | -0.215 | -0.124 | 0.03   | -0.018 | NA     | 0.081  |    | 0.122  |
| A006253_01 | 0.208  | -0.079 | -0.219 | -0.478 | 0.279  | 0.271  | -0.027 |    | -0.278 |
| A006254_01 | 0.329  | 0.31   | -0.235 | -0.163 | 0.004  | 0.165  | 0.18   |    | 0.269  |
| A006257_01 | -0.606 | -0.613 | -0.662 | 0.137  | -0.094 | -0.299 | -0.088 |    | -0.123 |
| A006260_01 | 0.148  | -0.037 | -0.755 | -1.487 | -0.095 | 0.147  | -0.424 |    | -0.265 |
| A006261_01 | 0.003  | 0.209  | -0.272 | 0.026  | -0.041 | 0.009  | -0.012 |    | 0.089  |
| A006263_01 | 0.024  | 0.001  | 0.282  | 0.114  | 0.007  | -0.083 | -0.151 |    | -0.122 |
| A006264_01 | -1.158 | -1.193 | -1.113 | -1.212 | -0.638 | -0.689 | -0.748 |    | -0.683 |
| A006269_01 | -0.55  | -0.411 | -0.056 | -0.042 | -0.068 | -0.027 | -0.007 | NA |        |
| A006273_01 | -0.194 | -0.14  | -0.516 | -0.955 | -0.17  | 0.183  | -0.082 |    | 0.118  |
| A006277_01 | 0.277  | 0.362  | 0.482  | 0.444  | 0.35   | 0.211  | 0.283  |    | 0.104  |
| A006278_01 | -0.07  | 0.047  | 0      | 0.305  | 0.341  | 0.558  | 0.437  |    | 0.409  |
| A006282_01 | -0.959 | -1.022 | -0.021 | 0.274  | -0.345 | -0.59  | -0.159 |    | -0.171 |
| A006284_01 | -0.617 | -0.625 | NA     | NA     | -0.896 | -1.222 | -0.585 | NA |        |
| A006288_01 | 0.011  | 0.152  | -0.126 | 0.494  | 0.069  | 0.082  | -0.063 |    | 0.005  |
| A006291_01 | -0.241 | 0.309  | 0.161  | -0.201 | 0.071  | 0.702  | 0.444  |    | 0.739  |
| A006298_01 | -0.455 | -0.008 | 0.088  | 0.568  | -0.297 | -0.066 | 0.059  |    | 0.363  |
| A006313_01 | -0.754 | -0.382 | -0.841 | -0.375 | -0.22  | -0.083 | -0.133 |    | 0.044  |
| A006316_01 | 0.08   | 0.386  | NA     | -0.212 | 0.029  | 0.256  | 0.019  | NA |        |
| A006323_01 | -0.631 | -0.576 | -0.143 | 0.094  | 0.03   | 0.018  | 0.013  |    | 0.094  |
| A006324_01 | 0.121  | 0.07   | -0.032 | 0.3    | 0.03   | 0.076  | 0.11   |    | 0      |
| A006327_01 | -0.176 | -0.095 | 0.27   | 0.102  | 0.168  | 0.226  | -0.067 | NA |        |
| A006329_01 | -0.495 | -0.419 | -1.006 | NA     | -0.188 | -0.283 | -0.35  | NA |        |
| A006330_01 | -0.228 | -0.174 | 0.17   | 0.065  | NA     | NA     | 0.169  |    | -0.017 |
| A006331_01 | -0.251 | -0.142 | -0.053 | 0.422  | -0.017 | -0.261 | -0.208 |    | -0.2   |
| A006342_01 | 0.123  | 0.184  | 0.287  | 0.146  | 0.111  | NA     | 0.045  |    | 0.121  |
| A006345_01 | -0.399 | -0.393 | 0.011  | 0.248  | -0.178 | -0.254 | 0.443  |    | 0.425  |
| A006350_01 | -0.407 | -0.136 | -0.3   | 0.165  | -0.366 | -0.256 | -0.401 |    | -0.304 |
| A006351_01 | -0.164 | 0.134  | -0.093 | 0.034  | -0.14  | -0.021 | -0.035 |    | 0.24   |
| A006357_01 | -0.405 | -0.328 | 0.021  | 0.151  | -0.082 | -0.057 | 0.003  |    | 0.008  |
| A006373_01 | 0.37   | 0.594  | 0.348  | -0.252 | 0.201  | 0.461  | -0.002 |    | -0.061 |
| A006374_01 | -0.377 | 0.075  | 0.29   | 0.321  | -0.32  | -0.295 | -0.211 |    | 0.268  |
| A006378_01 | 0.325  | 0.321  | 0.199  | -0.018 | 0.169  | 0.289  | 0.062  |    | 0.072  |
| A006384_01 | 0.216  | 0.285  | 0.296  | -0.092 | 0.017  | 0.042  | -0.002 |    | 0.098  |
| A006385_01 | -0.301 | -0.177 | 0.212  | -0.05  | 0.017  | -0.273 | -0.123 |    | -0.054 |
| A006387_01 | -1.156 | -1.402 | -0.902 | -0.872 | -0.186 | -0.307 | 0.092  |    | 0.05   |
| A006388_01 | 0.195  | 0.396  | 0.416  | 0.651  | 0.085  | 0.341  | 0.265  |    | 0.266  |
| A006389_01 | -1.035 | -0.776 | 0.029  | -0.086 | -0.494 | -0.475 | 0.078  |    | 0.222  |
| A006400_01 | 0.017  | -0.178 | 0.078  | 0.058  | 0.012  | -0.268 | -0.247 |    | -0.275 |
| A006402_01 | 0.022  | -0.09  | 0.091  | 0.261  | 0.069  | -0.176 | -0.043 |    | -0.014 |
| A006419_01 | -0.194 | -0.217 | -0.145 | 0.328  | -0.171 | -0.058 | -0.178 |    | 0.003  |
| A006421_01 | 0.566  | 0.58   | -0.112 | 0.057  | 0.21   | 0.648  | 0.326  |    | 0.334  |
| A006422_01 | 0.113  | NA     | -0.325 | -0.298 | 0.165  | NA     | -0.417 |    | -0.39  |
| A006429_01 | -0.399 | -0.523 | -1.148 | -0.175 | -0.376 | -0.139 | -0.478 | NA |        |
| A006432_01 | 0.393  | 0.586  | 0.153  | -0.343 | 0.233  | 0.412  | 0.091  |    | 0.041  |
| A006436_01 | 0.274  | 0.424  | 0.147  | -0.042 | 0.093  | 0.063  | -0.051 |    | -0.085 |
| A006441_01 | -0.615 | -0.692 | -1.239 | -0.955 | -0.381 | -0.473 | -1.678 | NA |        |
| A006442_01 | -0.144 | 0.413  | 0.097  | 0.022  | -0.049 | 0.242  | 0.183  |    | 0.394  |

|            |        |           |           |          |           |        |           |        |
|------------|--------|-----------|-----------|----------|-----------|--------|-----------|--------|
| A006451_01 | -0.273 | -0.018    | 0.352     | 0.195    | -0.173    | -0.17  | 0.097     | 0.14   |
| A006453_01 | -0.296 | -0.307    | -0.089    | 0.108    | 0.001     | -0.038 | -0.066    | -0.011 |
| A006456_01 | -0.859 | -0.7      | 0.011     | 0.586    | -1.127    | -1.115 | -0.175    | -0.113 |
| A006491_01 | -0.055 | -0.022    | -0.265    | -0.176   | 0.073     | 0.139  | 0.017     | 0.135  |
| A006523_01 | -0.395 | -0.123    | 0.269     | 0.015    | -0.291    | -0.166 | -0.153    | 0.041  |
| A006529_01 | 0.37   | 0.361     | 0.158     | -0.208   | 0.482     | 0.459  | 0.192     | 0.205  |
| A006550_01 | -0.15  | -0.196    | -0.283    | -0.08    | 0.13      | 0.011  | 0.068     | -0.14  |
| A006556_01 | -0.364 | -0.352    | 0.235     | 0.259    | -0.097    | -0.405 | 0.345     | 0.231  |
| A006564_01 | -0.016 | -0.25     | -0.178    | 0.112    | 0.13      | 0.041  | -0.247    | -0.094 |
| A006565_01 | -0.21  | -0.098    | -0.132    | -0.105   | 0.111     | -0.051 | -0.395 NA |        |
| A006567_01 | -1.258 | -1.139    | -0.471    | 0.004    | -0.614    | -0.61  | -0.21     | -0.023 |
| A006568_01 | -0.411 | -0.402    | -0.621    | -0.749   | -0.197    | -0.173 | -0.272    | -0.144 |
| A006569_01 | -0.088 | -0.014    | -0.002    | 0.133    | 0.19      | 0.049  | -0.024    | 0.001  |
| A006573_01 | -0.325 | 0.109     | 0.22      | 0.223    | -0.29     | -0.118 | -0.187    | 0.2    |
| A006574_01 | -0.527 | -0.002    | 0.227     | 0.168    | -0.397    | -0.063 | -0.126    | 0.291  |
| A006575_01 | -0.424 | -0.047    | 0.076     | -0.002   | 0.01      | 0.063  | 0.009     | 0.134  |
| A006579_01 | 0.304  | 0.045     | 0.248     | 0.347    | 0.17      | -0.09  | 0.022     | -0.256 |
| A006580_01 | 0.309  | 0.167     | 0.512     | 0.335    | 0.049     | 0.069  | 0.213     | 0.209  |
| A006581_01 | -0.107 | -0.202    | 0.075     | 0.398    | 0.305     | 0.289  | 0.053     | -0.142 |
| A006585_01 | -0.844 | 0.043     | 0.454     | -0.124   | -0.543    | 0.078  | -0.124    | 0.459  |
| A006586_01 | -0.452 | 0.033     | 0.143     | 0.106    | -0.116    | -0.046 | -0.098    | 0.164  |
| A006595_01 | -0.299 | -0.362    | -0.692 NA |          | -0.189    | -0.169 | -0.295 NA |        |
| A006596_01 | -1.643 | -1.113    | -0.261    | -0.574   | -1.128    | -0.61  | -0.423    | 0.095  |
| A006597_01 | -1.337 | -0.717    | 0.01 NA   |          | -0.818    | -0.353 | -0.282    | 0.241  |
| A006598_01 | -1.043 | -0.244    | -0.123 NA |          | -0.496    | -0.142 | -0.361    | 0.376  |
| A006603_01 | 0.734  | 0.88      | 0.444     | 0.208    | 0.299     | 0.438  | 0.336     | 0.38   |
| A006610_01 | 0.11   | 0.287     | -0.105    | -0.453   | 0.016     | -0.154 | -0.19     | -0.056 |
| A006611_01 | -0.344 | -0.223    | -0.337    | -0.362   | 0.016     | 0.042  | -0.282    | -0.186 |
| A006619_01 | 0.007  | 0.231     | 0.043     | -0.203   | 0.353     | 0.195  | 0.139     | 0.085  |
| A006622_01 | -2.152 | -2.679    | -2.053    | -2.315   | -1.235    | -1.378 | -0.803    | -0.565 |
| A006637_01 | -0.517 | -0.449    | 0.088     | 0.529    | -0.138    | -0.136 | -0.056 NA |        |
| A006660_01 | 0.242  | 0.097     | 0.435     | 0.154    | 0.084     | 0.028  | -0.148 NA |        |
| A006664_01 | -0.335 | -0.159    | 0.001     | 0.022    | 0.018     | -0.035 | 0.01      | 0.045  |
| A006665_01 | 0.813  | 0.646     | 0.354     | -0.089   | 0.127     | 0.336  | 0.138     | 0.03   |
| A006674_01 | -0.579 | -0.628 NA |           | -0.113   | -0.182 NA |        | -0.211    | -0.283 |
| A006676_01 | 0.358  | 0.667     | 0.228     | 0.191    | 0.08      | 0.169  | -0.177    | 0.035  |
| A006681_01 | -0.565 | -0.502    | 0.076     | -0.039   | -0.068    | 0.005  | -0.001    | 0.177  |
| A006684_01 | -0.485 | -0.58     | -0.272    | 0.029    | -0.28     | -0.406 | -0.123    | -0.094 |
| A006688_01 | 0.156  | 0.185     | -0.162    | 0.036    | 0.083     | 0.195  | -0.095    | 0.015  |
| A006689_01 | -0.24  | -0.067    | -0.012    | 0.008    | -0.03     | -0.253 | -0.16     | -0.17  |
| A006692_01 | 0.074  | 0.017     | -0.182    | -0.535   | 0.086     | -0.033 | -0.085    | -0.083 |
| A006694_01 | 0.298  | 0.253     | 0.222     | 0.253    | 0.122     | 0.098  | -0.1      | -0.022 |
| A006696_01 | 0.296  | 0.288     | 0.231     | 0.044    | 0.254     | 0.172  | 0.135     | -0.056 |
| A006708_01 | 0.472  | 0.649     | 0.542     | 0.275    | 0.533     | 0.498  | 0.203     | 0.06   |
| A006710_01 | -0.267 | -0.099    | 0.037     | -0.061   | 0.036     | 0.162  | -0.176    | -0.149 |
| A006715_01 | 0.029  | 0.108     | 0.155     | 0.215    | 0.144     | -0.079 | 0.209     | 0.058  |
| A006716_01 | 0.022  | -0.18     | 0.558     | 0.655    | 0.147     | -0.164 | 0.571     | 0.411  |
| A006724_01 | 0.587  | 0.734     | 0.873     | 0.974    | 0.193     | 0.294  | 0.189     | 0.173  |
| A006726_01 | 0.479  | 0.519     | 0.124     | -0.109   | -0.864    | -0.482 | 0.014 NA  |        |
| A006730_01 | 0.075  | 0.472     | 0.149     | -0.362   | 0.309     | 0.474  | 0.134     | 0.224  |
| A006733_01 | -0.455 | -0.537    | 0.071     | -0.431   | 0.045     | -0.29  | -0.019    | -0.237 |
| A006735_01 | -0.092 | -0.027    | -0.297    | -0.001   | 0.027     | 0.006  | -0.121    | -0.184 |
| A006736_01 | -1.748 | -1.815    | -2.09     | -1.807   | -0.642    | -0.585 | -0.926    | -0.688 |
| A006737_01 | 0.209  | 0.076     | 0.121     | -0.102   | 0.109     | -0.034 | 0.058     | -0.149 |
| A006738_01 | 0.117  | 0.073     | 0.038     | -0.201   | -0.024    | -0.057 | 0.124     | 0.107  |
| A006742_01 | 0.145  | -0.135    | -0.194    | 0.128    | -0.091    | 0.106  | -0.277    | -0.307 |
| A006744_01 | -0.068 | -0.119    | 0.187     | 0.111    | 0.131     | 0.257  | 0.343     | 0.199  |
| A006748_01 | -0.267 | -0.373    | 0.165     | 0.376    | 0.069     | -0.105 | 0.209     | 0.133  |
| A006754_01 | -0.732 | -0.658    | -0.291    | -0.409   | -0.394    | -0.188 | 0.072     | 0.194  |
| A006755_01 | 0.492  | 0.49      | 0.643     | -0.201   | 0.457     | 0.671  | 0.515 NA  |        |
| A006761_01 | -0.794 | -0.621    | -0.224    | -0.284   | -0.349    | -0.259 | 0.381     | 0.387  |
| A006763_01 | 0.161  | 0.352     | 0.328     | 0.038 NA |           | 0.485  | 0.405     | 0.065  |
| A006769_01 | -0.393 | -0.541    | -0.214    | 0.166    | 0.201     | -0.137 | -0.28     | -0.243 |
| A006771_01 | 0.042  | 0.069     | -0.155    | -0.036   | -0.06     | 0.132  | -0.157    | -0.003 |
| A006781_01 | 0.41   | 0.279     | 0.025     | 0.187    | 0.062     | -0.037 | 0.042     | -0.022 |
| A006787_01 | -0.033 | -0.182    | -0.497    | -0.317   | 0.008     | 0.17   | -0.092    | -0.102 |
| A006789_01 | -1.02  | -1.13     | -0.539    | -0.281   | -0.241    | -0.778 | 0.357     | 0.057  |
| A006790_01 | 0.419  | 0.515     | 0.225     | 0.294    | 0.14      | 0.38   | 0.206     | 0.298  |

|            |           |        |          |        |           |        |           |        |
|------------|-----------|--------|----------|--------|-----------|--------|-----------|--------|
| A006794_01 | 0.186     | 0.26   | 0.024    | 0.234  | 0.078     | 0.247  | -0.196    | 0.056  |
| A006797_01 | 0.504     | 0.462  | -0.059   | 0.212  | 0.043     | -0.076 | -0.058    | -0.22  |
| A006799_01 | -0.16     | -0.356 | -0.383   | 0.063  | 0.319     | 0.33   | 0.087     | 0.01   |
| A006800_01 | 0.254     | 0.119  | -0.677   | -1.274 | -0.03 NA  |        | -0.145    | -0.358 |
| A006802_01 | -2.272 NA |        | -1.775   | -1.627 | -1.804    | -2.413 | -0.143    | -0.2   |
| A006803_01 | -0.146    | 0.157  | -0.096   | 0.091  | -0.005    | 0.103  | 0.2       | 0.193  |
| A006804_01 | 0.142     | 0.149  | 0.225    | -0.024 | 0.215     | 0.24   | 0.091     | 0.173  |
| A006805_01 | -0.124    | -0.057 | 0.09     | 0.354  | -0.054    | 0.117  | 0.067     | 0.158  |
| A006806_01 | -0.539    | -0.644 | -0.231   | -0.155 | -0.006    | -0.176 | 0.069     | -0.093 |
| A006808_01 | -0.2      | -0.045 | 0.287    | 0.277  | 0.018     | -0.047 | 0.161     | 0.003  |
| A006809_01 | -0.047    | 0.009  | 0.143 NA |        | -0.107    | -0.261 | -0.239 NA |        |
| A006811_01 | 0.024     | -0.167 | 0.221    | -0.163 | 0.046     | 0.147  | 0.237     | -0.017 |
| A006815_01 | -0.016    | -0.174 | -0.054   | 0.13   | 0.222     | -0.029 | 0.028     | -0.098 |
| A006816_01 | -0.325    | -0.219 | 0.024    | -0.121 | -0.296    | -0.343 | -0.032    | -0.098 |
| A006817_01 | -0.191    | 0.063  | 0.013    | -0.175 | 0.072     | 0.039  | -0.167    | -0.129 |
| A006819_01 | -0.209    | -0.324 | -0.138   | -0.218 | -0.132    | -0.09  | -0.049    | 0.094  |
| A006821_01 | -0.128    | -0.166 | -0.101   | 0.064  | -0.108    | -0.144 | -0.154    | -0.244 |
| A006822_01 | -0.505    | -0.459 | -0.686   | -0.128 | -0.047    | -0.105 | 0.021 NA  |        |
| A006824_01 | 0.935     | 0.894  | 0.633    | 1.318  | -0.239 NA |        | -0.435    | -0.323 |
| A006826_01 | -0.094    | 0.034  | 0.215    | 0.365  | 0.038     | 0.219  | -0.416    | -0.184 |
| A006827_01 | 0.124     | 0.022  | 0.521    | 0.149  | 0.479     | 0.48   | 0.589     | 0.522  |
| A006828_01 | -0.463    | -0.199 | 0.011    | 0.086  | -0.145    | -0.008 | -0.159 NA |        |
| A006829_01 | -0.197    | -0.261 | -0.251   | -0.351 | -0.074    | 0.075  | 0.087     | -0.005 |
| A006830_01 | -0.344    | 0.152  | 0.101    | 0.003  | 0.124     | 0.377  | -0.283    | 0.132  |
| A006831_01 | -0.011    | 0.14   | 0.142    | 0.16   | 0.266     | 0.194  | -0.069    | -0.043 |
| A006832_01 | -0.322    | -0.278 | -0.455   | -0.41  | 0.058     | -0.016 | -0.096    | -0.128 |
| A006847_01 | -0.033    | -0.167 | 0.213    | 0.699  | -0.502    | -0.966 | -0.094    | -0.102 |
| A006849_01 | -0.177    | 0.049  | -0.077   | 0.166  | 0.163     | 0.031  | -0.249    | 0.041  |
| A006850_01 | -0.127    | -0.103 | 0.114    | 0.346  | -0.029    | -0.135 | -0.146 NA |        |
| A006852_01 | -0.279    | -0.28  | 0.238    | -0.376 | 0.074     | -0.036 | -0.117    | -0.089 |
| A006854_01 | -0.43     | -0.356 | -0.353   | -0.6   | -0.195    | -0.366 | -0.21     | -0.282 |
| A006857_01 | -0.01     | 0.024  | -0.204   | 0.424  | -0.196    | -0.067 | -0.311 NA |        |
| A006864_01 | -0.144    | 0.005  | 0.109    | 0.357  | 0.008     | -0.158 | -0.174    | -0.003 |
| A006867_01 | -0.035    | -0.065 | -0.22    | 0.165  | -0.137    | -0.252 | -0.145    | -0.121 |
| A006868_01 | -0.217    | 0.14   | -0.396   | 0.284  | -0.057    | 0.416  | -0.35 NA  |        |
| A006869_01 | -0.359    | -0.34  | 0.13     | -0.759 | -0.069    | -0.106 | 0.197     | 0.159  |
| A006871_01 | -0.125    | 0.125  | -0.07    | -0.259 | 0.102     | -0.048 | -0.111    | -0.1   |
| A006876_01 | 0.101     | 0.27   | 0.088    | 0.159  | 0.003     | 0.039  | 0.033     | 0.069  |
| A006880_01 | 0.041     | -0.045 | 0.216    | 0.087  | 0.083     | -0.066 | 0.171     | 0.174  |
| A006882_01 | -0.151    | 0.025  | -0.015   | 0.247  | -0.184    | -0.025 | -0.129    | -0.131 |
| A006885_01 | 0.229     | 0.169  | -0.125   | -0.096 | 0.22      | 0.333  | -0.366    | -0.313 |
| A006890_01 | 0.43      | 0.341  | 0.097    | -0.304 | 0.137     | 0.332  | 0.255     | 0.058  |
| A006893_01 | -0.093    | -0.097 | -0.391   | -0.355 | -0.093    | 0.001  | -0.187    | -0.232 |
| A006896_01 | 0.314     | 0.441  | 0.342    | 0.033  | 0.269     | 0.246  | 0.059     | 0.081  |
| A006897_01 | -0.595    | -0.627 | -0.106   | -0.5   | -0.034    | 0.045  | 0.348     | 0.322  |
| A006907_01 | 0.135     | 0.292  | -0.131   | -0.029 | 0.19      | 0.187  | 0.07      | 0.018  |
| A006913_01 | -0.444    | -0.235 | -0.065   | -0.134 | -0.733    | -0.415 | 0.13      | 0.411  |
| A006918_01 | -0.048    | -0.134 | -0.248   | -0.255 | 0.005     | -0.096 | 0.023     | 0.044  |
| A006919_01 | -0.281    | -0.101 | 0.585    | 0.278  | 0.558     | 0.635  | 0.038     | 0.14   |
| A006924_01 | -0.07     | 0.172  | 0.408    | 0.324  | 0.407     | 0.611  | -0.205    | -0.281 |
| A006928_01 | 0.259     | 0.374  | -0.332   | 0.099  | -0.052    | -0.062 | -0.222 NA |        |
| A006935_01 | 0.58      | 0.527  | 0.696    | 0.853  | 0.624     | 0.93   | 0.568 NA  |        |
| A006937_01 | 0.308     | 0.328  | -0.088   | 0.291  | 0.009     | -0.096 | -0.201    | -0.057 |
| A006944_01 | -0.896    | -0.953 | -0.623   | -1.353 | -0.17     | -0.179 | -0.02     | 0.155  |
| A006948_01 | 0.064     | -0.048 | 0.339    | -0.055 | 0.322     | -0.048 | 0.367     | 0.288  |
| A006949_01 | -0.101    | -0.212 | -0.193   | 0.298  | -0.163    | -0.081 | -0.14     | -0.135 |
| A006954_01 | -0.127    | -0.249 | -0.275   | -0.529 | 0.146     | -0.037 | 0.003     | 0.121  |
| A006959_01 | -0.269    | -0.146 | -0.195   | 0.008  | 0.051     | -0.121 | 0.076     | 0.046  |
| A006971_01 | 0.516     | 0.463  | 0.526    | -0.122 | 0.307     | 0.636  | 0.246     | 0.299  |
| A006972_01 | -0.144    | -0.088 | -0.244   | -0.089 | -0.403    | -0.5   | -0.087    | -0.017 |
| A006974_01 | 0.157     | 0.052  | -0.7     | -0.603 | -0.093    | 0.157  | -0.377 NA |        |
| A006975_01 | -0.029    | -0.05  | -0.61    | -0.741 | 0.215     | 0.29   | -0.951    | -0.869 |
| A006984_01 | 0.414     | 0.361  | 0.2      | 0.13   | 0.011     | -0.236 | -0.17     | -0.283 |
| A006988_01 | 0.137     | 0.293  | 0.303    | 0.086  | -0.091    | -0.12  | 0.043     | 0.111  |
| A006992_01 | 0.588     | 0.522  | 0.325    | 0.321  | 0.046     | 0.23   | 0.144     | 0.133  |
| A007000_01 | -0.344    | -0.44  | -0.331   | -0.044 | -0.114    | -0.096 | -0.211    | -0.302 |
| A007002_01 | 0.048     | 0.14   | -0.428   | 0.526  | 0.036     | 0.093  | -0.132    | -0.088 |
| A007010_01 | 0.054     | 0.067  | 0.407    | 0.21   | -0.087    | -0.074 | -0.045 NA |        |

|            |           |           |        |        |           |        |           |        |
|------------|-----------|-----------|--------|--------|-----------|--------|-----------|--------|
| A007017_01 | -0.41     | -0.735    | -0.397 | -0.267 | 0.114     | -0.033 | 0.18 NA   |        |
| A007021_01 | -0.243    | 0.021     | 0.056  | 0.028  | -0.122    | -0.122 | -0.075    | -0.006 |
| A007023_01 | 0.226     | 0.157     | -0.501 | 0.165  | -0.019    | 0.098  | -0.053    | -0.215 |
| A007045_01 | -0.041    | 0.059     | 0.282  | -0.377 | 0.255     | 0.072  | -0.107 NA |        |
| A007051_01 | -0.408    | -0.083    | 0.298  | 0.203  | -1.123    | -1.387 | -0.207 NA |        |
| A007052_01 | -0.528    | -0.328    | -0.222 | -0.381 | -0.1      | 0.062  | -0.02     | 0.091  |
| A007054_01 | 0.538     | 0.64      | 0.593  | 0.187  | 0.116     | 0.241  | 0.515     | 0.336  |
| A007058_01 | -0.612    | -0.695    | -0.464 | -0.405 | 0.388     | 0.359  | 0.073 NA  |        |
| A007061_01 | 0.137     | -0.297    | 0.253  | 0.649  | -0.263    | -0.484 | -0.109    | -0.122 |
| A007062_01 | 0.021     | 0.113     | -0.052 | -0.158 | -0.182 NA |        | 0.086     | -0.014 |
| A007064_01 | 0.682     | 0.876     | 0.544  | 0.975  | 0.221     | 0.074  | 0.57      | 0.595  |
| A007067_01 | 0.176     | 0.246     | 0.311  | 0.291  | 0.026     | 0.043  | -0.14     | 0.015  |
| A007073_01 | 0.348     | 0.232     | 0.804  | 0.589  | 0.591     | 0.461  | 0.529     | 0.443  |
| A007075_01 | -0.292    | -0.19     | -0.246 | 0.075  | -0.102    | 0.15   | -0.242    | -0.228 |
| A007087_01 | 0.046     | 0.019     | -0.636 | -0.821 | -0.139 NA |        | -0.125    | -0.236 |
| A007090_01 | -0.142    | -0.176    | -0.004 | -0.033 | 0.063     | 0.155  | -0.091    | -0.01  |
| A007093_01 | -0.23     | -0.143    | -0.077 | 0.238  | 0.086     | 0.067  | 0.099     | 0.061  |
| A007098_01 | 0.073     | 0.269     | 0.415  | -0.144 | 0.248     | 0.251  | -0.163 NA |        |
| A007103_01 | 0.061     | 0.124     | -0.017 | 0.061  | 0.1       | -0.004 | -0.239    | -0.046 |
| A007112_01 | 0.191     | 0.057     | -0.119 | -0.157 | 0.181     | 0.211  | 0.146 NA  |        |
| A007117_01 | 0.335     | 0.362     | -0.025 | -0.358 | 0.254     | 0.37   | 0.091     | 0.043  |
| A007119_01 | -0.203    | -0.259    | -0.384 | 0.086  | 0.022     | 0.3    | -0.022    | -0.027 |
| A007130_01 | 0.456     | 0.443     | -0.03  | 0.136  | -0.067    | -0.052 | -0.05     | -0.043 |
| A007131_01 | 0.02      | -0.42     | -0.257 | -0.067 | 0.195     | 0.118  | 0.027     | -0.038 |
| A007132_01 | 0.182 NA  |           | 0.108  | 0.16   | -0.074 NA |        | -0.124    | -0.134 |
| A007142_01 | -0.341    | -0.322    | 0.045  | -0.156 | -0.305    | -0.547 | 0.015     | 0.002  |
| A007148_01 | -0.104    | -0.223    | 0.166  | -0.022 | -0.11     | -0.006 | 0.027     | -0.038 |
| A007152_01 | 0.311     | 0.414     | 0.446  | 0.665  | 0.003     | 0.151  | 0.089     | 0.022  |
| A007153_01 | 0.126     | -0.079    | 0.005  | 0.12   | 0.119     | -0.051 | -0.014    | -0.101 |
| A007158_01 | -0.067    | -0.136    | -0.049 | -0.006 | 0.074     | 0.107  | -0.023    | 0.077  |
| A007167_01 | -0.266    | -0.289    | -0.192 | -0.588 | 0.135     | 0.109  | -0.358    | -0.23  |
| A007169_01 | 0.218     | 0.016     | -0.007 | 0.135  | 0.118     | 0.149  | 0.132     | -0.028 |
| A007170_01 | 0.243     | 0.242     | 0.525  | 0.251  | 0.021     | 0.286  | 0.099     | 0.091  |
| A007173_01 | -0.043    | -0.034    | -0.266 | 0.149  | 0.029     | -0.122 | -0.05     | -0.055 |
| A007183_01 | 0.237     | 0.127     | 0.086  | -0.062 | 0.279     | 0.099  | 0.031     | -0.144 |
| A007211_01 | -0.702    | -0.326    | -0.211 | -0.638 | -0.258    | -0.083 | 0.17      | 0.277  |
| A007218_01 | -0.479    | -0.339 NA |        | 0.322  | -0.594    | -0.672 | -0.272 NA |        |
| A007219_01 | -0.337    | -0.255    | -0.193 | -0.859 | -0.279    | -0.422 | -0.187    | -0.064 |
| A007221_01 | 0.126     | -0.165    | -0.225 | -0.055 | 0.037     | 0.12   | -0.037    | -0.025 |
| A007222_01 | 0.405     | 0.501     | 0.258  | -0.363 | 0.174     | 0.266  | -0.137    | -0.177 |
| A007225_01 | -0.371    | -0.364    | -0.325 | 0.096  | -0.217 NA |        | -0.202    | -0.133 |
| A007228_01 | 0.384     | 0.248     | 0.383  | 0.373  | -0.022    | -0.196 | 0.087     | 0.053  |
| A007234_01 | -0.448    | -0.574    | -0.278 | 0.147  | -0.22     | -0.194 | -0.181    | 0.009  |
| A007242_01 | -0.096    | -0.24     | 0.313  | 0.112  | 0.134     | -0.037 | 0.13 NA   |        |
| A007243_01 | -0.573    | -0.826    | -0.223 | -0.645 | -0.076    | -0.306 | 0.162 NA  |        |
| A007245_01 | -0.128    | -0.275 NA |        | -0.018 | 0.038     | -0.176 | 0.096     | -0.143 |
| A007246_01 | -0.468    | -0.994    | -1.169 | -1.014 | -0.895    | -1.708 | -1.529    | -0.963 |
| A007250_01 | 0.314     | 0.233     | 0.121  | -0.144 | 0.223     | 0.265  | 0.06      | -0.044 |
| A007251_01 | -0.998 NA |           | -1.145 | -0.968 | -0.633 NA |        | -0.201    | -0.246 |
| A007252_01 | 0.167     | 0.314     | -0.217 | -0.135 | -0.338    | -0.029 | -0.135    | 0.073  |
| A007255_01 | -0.473    | -0.351    | -0.314 | -0.236 | -0.022 NA |        | 0.155 NA  |        |
| A007256_01 | 0.602     | 0.463     | 0.69   | 0.813  | 0.31 NA   |        | 0.404     | 0.137  |
| A007258_01 | 0.364     | 0.423     | 0.379  | 0.055  | 0.115     | 0.133  | 0.032     | 0.259  |
| A007259_01 | -0.155    | -0.216    | -0.1   | -0.022 | -0.245    | -0.331 | -0.181    | -0.193 |
| A007260_01 | -0.898    | -1.152    | -1.099 | -1.103 | -0.32     | -0.627 | -0.179    | -0.116 |
| A007262_01 | 0.091     | 0.251     | 0.267  | 0.565  | -0.076    | 0.166  | -0.076    | 0.049  |
| A007265_01 | -0.051    | -0.049    | -0.083 | 0.136  | 0.039     | 0.061  | -0.124    | -0.031 |
| A007266_01 | 0.169     | 0.087     | 0.373  | -0.229 | 0.386     | 0.219  | 0.177     | 0.164  |
| A007268_01 | -0.139    | -0.285    | 0.106  | -0.243 | 0.149     | 0.072  | 0.019     | -0.075 |
| A007272_01 | 0.136     | 0.233     | -0.228 | -0.558 | -0.092    | 0.362  | -0.105 NA |        |
| A007273_01 | 0         | 0.154     | -0.088 | -0.131 | -0.055 NA |        | 0.115 NA  |        |
| A007274_01 | -0.006    | -0.339    | 0.17   | -0.09  | 0.182     | 0.262  | -0.034    | 0.092  |
| A007275_01 | 0.076 NA  |           | -0.044 | -0.015 | -0.106 NA |        | -0.047    | -0.061 |
| A007277_01 | 0.296     | 0.19      | 0.452  | -0.026 | 0.144     | 0.11   | 0.118     | 0.049  |
| A007278_01 | -0.817    | -0.662    | 0.067  | 0.113  | -0.258    | -0.405 | 0.123     | 0.112  |
| A007279_01 | 0.519     | 0.552     | 0.619  | -0.098 | 0.211     | 0.414  | 0.401     | 0.344  |
| A007280_01 | -0.345    | -0.645    | -0.08  | -0.566 | -0.237    | -0.366 | 0.011     | -0.051 |
| A007281_01 | 0.116     | 0.114     | -0.294 | -0.129 | 0.195     | 0.138  | -0.055    | -0.108 |

|            |           |        |        |        |           |        |           |        |
|------------|-----------|--------|--------|--------|-----------|--------|-----------|--------|
| A007283_01 | -0.018    | -0.192 | -0.404 | -0.836 | 0.233     | 0.319  | 0         | -0.084 |
| A007284_01 | -0.446 NA |        | -0.896 | -0.341 | 0.129 NA  |        | -0.089    | -0.198 |
| A007285_01 | -0.722    | -0.478 | -0.009 | 0.267  | -0.092    | 0.075  | 0.371     | 0.677  |
| A007287_01 | 0.065     | -0.014 | -0.419 | -0.074 | 0.083     | 0.184  | -0.072    | -0.002 |
| A007288_01 | 0.85      | 0.755  | 0.23   | -0.883 | 0.273     | 0.49   | 0.135     | -0.12  |
| A007290_01 | 0.374     | 0.27   | -0.312 | 0.048  | -0.057    | 0.036  | -0.309    | -0.411 |
| A007291_01 | -0.023    | 0.056  | 0.869  | 1.032  | 0.99      | 0.933  | 0.388     | 0.413  |
| A007293_01 | 0.175     | -0.025 | -0.288 | 0.168  | 0.12      | 0.313  | -0.068    | -0.011 |
| A007294_01 | -0.668    | -1.278 | -0.834 | -0.699 | -0.294    | -0.523 | -0.259    | -0.357 |
| A007297_01 | -0.564    | -0.24  | -0.454 | 0.109  | -0.178    | 0.058  | 0.044     | 0.05   |
| A007298_01 | -0.07     | -0.141 | -0.323 | -0.168 | -0.099    | -0.34  | -0.056    | 0.042  |
| A007299_01 | -0.09     | -0.455 | -0.271 | 0.209  | 0.124     | -0.059 | 0.208     | 0.008  |
| A007300_01 | -0.013    | -0.163 | 0.573  | 0.494  | -0.241    | -0.43  | 0.15      | 0.087  |
| A007302_01 | -1.644    | -1.872 | -0.571 | -0.75  | -0.957    | -1.155 | -0.299    | -0.204 |
| A007303_01 | 0.223     | 0.288  | 0.533  | 0.033  | -0.036    | -0.162 | 0.153     | 0.027  |
| A007305_01 | -1.214    | -1.102 | -0.319 | 0.001  | -1.623    | -1.993 | -0.462    | -0.262 |
| A007306_01 | 0.624     | 0.467  | 0.22   | 0.277  | -0.308    | 0.101  | 0.383     | 0.442  |
| A007307_01 | 0.067     | 0.286  | 0.039  | 0.254  | 0.047     | 0.058  | -0.214    | -0.075 |
| A007309_01 | 0.171     | 0.02   | -0.153 | -0.016 | 0.075     | 0.181  | 0.095     | 0.157  |
| A007310_01 | 0.111     | 0.012  | 0.002  | -0.255 | -0.039    | 0.114  | -0.091    | -0.035 |
| A007311_01 | 1.145     | 0.933  | 0.494  | 0.547  | 0.261     | 0.354  | 0.147     | 0.097  |
| A007313_01 | -0.032 NA |        | 0.416  | 0.061  | -0.317    | -0.283 | 0.372 NA  |        |
| A007314_01 | -0.116    | 0.091  | -0.147 | -0.034 | -0.303    | -0.099 | -0.232    | -0.181 |
| A007315_01 | 0.242     | 0.271  | 0.198  | -0.665 | -0.076    | 0.209  | 0.029     | 0.194  |
| A007317_01 | 0.557     | 0.482  | 0.275  | 0.07   | -0.031 NA |        | 0.169     | 0.125  |
| A007318_01 | -0.339    | -0.326 | -0.067 | 0.084  | -0.617    | -0.776 | -0.143    | -0.098 |
| A007320_01 | 0.397     | 0.542  | 0.177  | 0.281  | -0.072    | 0.178  | -0.014    | 0.014  |
| A007322_01 | 0.235     | 0.229  | -0.16  | -0.1   | 0.192     | 0.406  | -0.149    | -0.122 |
| A007324_01 | -0.106    | 0.181  | -0.19  | 0.46   | 0.075     | 0.128  | -0.247 NA |        |
| A007325_01 | 0.745     | 0.631  | 0.431  | 0.547  | 0.3       | 0.537  | 0.36      | 0.376  |
| A007327_01 | -0.295    | -0.057 | 0.01   | -0.435 | -0.276    | -0.06  | 0.208     | 0.27   |
| A007331_01 | -0.028    | -0.134 | -0.471 | 0.077  | -0.063    | -0.461 | -0.218    | -0.144 |
| A007333_01 | 0.061     | -0.069 | -0.213 | 0.384  | 0.211     | -0.177 | -0.2      | -0.166 |
| A007334_01 | -0.801    | -1.071 | -0.606 | -0.895 | -0.56     | -0.841 | -0.355    | -0.198 |
| A007335_01 | 0.093     | 0.104  | -0.104 | -0.272 | 0.268     | 0.198  | 0.022     | -0.055 |
| A007336_01 | 0.313     | 0.11   | 0.383  | 0.516  | 0.414     | 0.451  | 0.086     | 0.039  |
| A007338_01 | -0.166    | -0.316 | -0.203 | 0.062  | -0.21     | -0.29  | -0.257    | -0.105 |
| A007340_01 | -0.05     | -0.015 | -0.031 | 0.384  | -0.247    | -0.276 | -0.038    | -0.03  |
| A007341_01 | -0.781    | -0.795 | -0.671 | -0.68  | -0.559 NA |        | 0.128     | 0.069  |
| A007342_01 | -0.138    | -0.417 | 0.241  | 0.406  | -0.19     | -0.467 | -0.261    | -0.214 |
| A007347_01 | 0.485     | 0.79   | 0.605  | 0.506  | -0.062    | 0.005  | 0.146     | 0.427  |
| A007348_01 | 0.189     | 0.21   | 0.381  | -0.219 | 0.142     | 0.231  | 0.216     | 0.259  |
| A007349_01 | -0.548    | -0.539 | -0.529 | 0.315  | -0.19     | -0.276 | -0.255    | -0.073 |
| A007351_01 | -0.092    | -0.087 | -0.131 | -0.574 | -0.052    | -0.363 | -0.165    | -0.153 |
| A007353_01 | -2.904    | -2.608 | -1.116 | -1.136 | -1.693    | -1.427 | -0.652    | -0.179 |
| A007354_01 | -0.238 NA |        | -0.441 | -0.033 | 0.112     | 0.137  | -0.128 NA |        |
| A007357_01 | 0.777     | 0.596  | 0.023  | 0.665  | -0.167    | -0.122 | -0.529    | -0.429 |
| A007361_01 | -0.392    | -0.388 | -0.268 | -0.155 | -0.08     | -0.225 | -0.264 NA |        |
| A007362_01 | 0.846     | 1.001  | 0.08   | 0.259  | 0.473     | 1.024  | -0.162    | 0.158  |
| A007363_01 | 0.067     | 0.195  | 0.326  | 0.171  | -0.049    | -0.041 | 0.008     | -0.061 |
| A007364_01 | 0.149     | 0.074  | -0.04  | 0      | 0.021     | -0.023 | -0.095    | -0.068 |
| A007365_01 | 0.077     | 0.109  | 0.465  | 0.703  | 0.005 NA  |        | 0.192     | 0.116  |
| A007366_01 | -0.093    | -0.092 | -0.008 | -0.078 | 0.04      | -0.042 | -0.022    | -0.178 |
| A007367_01 | -0.414    | -0.213 | -0.711 | -0.483 | -0.739    | -0.514 | -0.087    | -0.066 |
| A007370_01 | 0.646     | 0.743  | 0.217  | 0.019  | 0.058     | 0.381  | 0.179     | 0.409  |
| A007372_01 | -0.257    | -0.379 | -0.117 | -0.17  | -0.061    | 0.001  | -0.012    | -0.079 |
| A007373_01 | 0.277     | 0.122  | -0.204 | 0.228  | 0.114     | -0.029 | -0.111    | -0.145 |
| A007375_01 | -0.001    | -0.127 | 0.053  | 0.062  | 0.189     | 0.168  | 0.21      | 0.186  |
| A007379_01 | -0.019    | 0      | 0.765  | 0.756  | 0.162     | 0.061  | 0.311     | 0.245  |
| A007382_01 | 1.02      | 0.799  | 0.32   | 0.237  | 0.4       | 0.472  | 0.188     | 0.075  |
| A007383_01 | -0.497    | -0.693 | -0.135 | -0.2   | -0.061    | 0.192  | 0.379     | 0.262  |
| A007384_01 | -0.037    | 0.024  | -0.026 | -0.113 | 0.062     | 0.214  | -0.086    | 0.027  |
| A007385_01 | -1.056    | -1.332 | -0.463 | -0.941 | -0.525    | -0.756 | 0.006     | -0.133 |
| A007386_01 | 0.345     | 0.363  | 0.39   | 0.496  | 0.303     | 0.251  | -0.06 NA  |        |
| A007387_01 | 0.356     | 0.058  | -0.114 | 0.294  | 0.067     | -0.102 | -0.125    | -0.146 |
| A007394_01 | -0.057 NA |        | -0.219 | 0.173  | -0.073 NA |        | -0.024    | 0.024  |
| A007395_01 | 0.037     | 0.131  | -0.029 | -0.61  | 0.004     | 0.139  | 0.143     | 0.083  |
| A007405_01 | 0.392     | 0.285  | -0.101 | -0.214 | 0.279     | 0.497  | 0.041     | -0.027 |

|            |           |           |        |           |           |        |           |        |
|------------|-----------|-----------|--------|-----------|-----------|--------|-----------|--------|
| A007406_01 | 0.455     | 0.21      | -0.012 | -0.226    | 0.076     | 0.183  | 0.013     | -0.008 |
| A007409_01 | -0.09     | -0.017    | 0.382  | 0.494     | -0.089    | -0.275 | 0.161 NA  |        |
| A007414_01 | -0.033    | 0.012     | 0.359  | 0.42      | 0.034     | 0.145  | 0.487     | 0.437  |
| A007422_01 | 0.017     | 0.073     | 0.156  | 0.306     | 0.12      | 0.115  | 0.308     | 0.185  |
| A007424_01 | 0.082     | 0.243 NA  |        | 0.258     | 0.147     | 0.066  | 0.031     | 0.069  |
| A007428_01 | -0.928    | -0.871 NA |        | -0.392    | -0.281    | -0.388 | -0.349    | -0.15  |
| A007429_01 | -0.024    | -0.168    | -0.929 | -0.908    | 0.298     | 0.479  | -0.016    | -0.042 |
| A007430_01 | -0.277    | -0.269    | -0.081 | -0.152    | 0.025     | -0.226 | -0.21     | -0.122 |
| A007431_01 | 0.05      | 0.014     | 0.151  | -0.011    | 0.214     | 0.082  | -0.143    | -0.058 |
| A007433_01 | -1.306    | -1.182    | -1.15  | -1.657    | -0.085    | 0.107  | -0.015    | 0.1    |
| A007434_01 | 0.201     | 0.043     | 0.037  | -0.024    | 0.087     | 0.25   | -0.215    | -0.122 |
| A007435_01 | -0.203    | -0.215    | -0.068 | 0.159     | 0.185     | -0.083 | -0.126    | -0.003 |
| A007436_01 | -0.141    | 0.238     | 0.577  | 0.304     | -0.272    | -0.069 | 0.29      | 0.395  |
| A007438_01 | -0.203    | -0.266    | -0.167 | 0.063     | 0.103     | 0.017  | -0.122    | -0.078 |
| A007442_01 | -0.956    | -0.972    | -0.486 | -0.545    | -0.476    | -0.462 | -0.405    | -0.111 |
| A007445_01 | -0.248    | -0.269    | 0.142  | 0.254     | 0.052     | -0.136 | -0.022    | 0.179  |
| A007459_01 | 0.496     | 0.755     | 0.4    | 0.073     | -0.425    | -0.491 | -0.214    | -0.089 |
| A007468_01 | -0.256    | -0.224 NA | NA     |           | 0.015 NA  |        | -0.191 NA |        |
| A007475_01 | 0.454     | 0.567     | 0.58   | 0.797     | -1.052    | -1.452 | -0.25     | -0.017 |
| A007479_01 | -0.152    | -0.033 NA |        | 0.586     | 0.305     | 0.175  | -0.333 NA |        |
| A007484_01 | -0.182    | -0.167    | -0.451 | 0.133     | -0.079    | -0.323 | -0.325    | -0.276 |
| A007485_01 | 0.212     | 0.179     | -0.143 | 0.038     | 0.04      | 0.115  | -0.095    | -0.017 |
| A007498_01 | -0.082    | 0.085     | -0.21  | -0.537    | 0.035     | 0.041  | 0.045 NA  |        |
| A007499_01 | 0.521     | 0.649     | 0.199  | -0.049    | 0.077     | 0.541  | 0.179     | 0.278  |
| A007502_01 | -0.362    | -0.207 NA |        | -0.236    | -0.414    | -0.192 | -0.324    | -0.039 |
| A007508_01 | 0.238     | 0.119     | -0.454 | 0.169     | -0.255    | 0.04   | -0.138    | -0.068 |
| A007510_01 | -0.446    | -0.418    | 0.29   | 0.079     | -0.103    | -0.26  | -0.06 NA  |        |
| A007513_01 | -0.135    | -0.061    | -0.211 | 0.41      | -0.14     | -0.131 | -0.301    | -0.194 |
| A007519_01 | -0.016    | 0.031 NA  |        | 0.622     | -0.085    | -0.161 | -0.068    | -0.029 |
| A007520_01 | -0.573    | -0.526    | -0.136 | 0.133     | -0.053    | 0.003  | 0.101     | 0.103  |
| A007521_01 | -0.318    | -0.393    | -0.25  | 0.185     | 0.037     | -0.212 | -0.053 NA |        |
| A007522_01 | 0.092     | 0.123     | -0.073 | 0.114     | 0.024     | 0.009  | -0.018    | 0.106  |
| A007524_01 | 0.061     | -0.106    | 0.144  | -0.105    | 0.321     | 0.132  | -0.011    | -0.056 |
| A007526_01 | 0.219     | 0.425     | 0.102  | -0.456    | 0.233     | 0.4    | -0.024    | 0.165  |
| A007530_01 | 0.275     | 0.241     | 0.074  | -0.245    | 0.243     | 0.581  | 0.045     | 0.148  |
| A007535_01 | 0.37      | 0.344     | 0.033  | 0.325     | 0.722     | 0.974  | -0.043    | 0.169  |
| A007537_01 | -0.108    | 0         | 0.276  | -0.136    | 0.278     | 0.38   | 0.103     | 0.171  |
| A007548_01 | -1.375    | -1.463    | -0.26  | -0.238    | -0.019    | 0.013  | 0.608     | 0.745  |
| A007549_01 | 0.241     | 0.017     | -0.176 | -0.088    | 0.042     | 0.187  | -0.091    | -0.098 |
| A007554_01 | 0.282     | 0.271     | -0.009 | 0.082     | 0.024 NA  |        | 0.09      | 0.147  |
| A007555_01 | -0.084 NA |           | 0.015  | 0.28      | -0.508 NA |        | -0.341    | -0.337 |
| A007564_01 | -0.327    | -0.504 NA | NA     |           | -0.181 NA | NA     | NA        |        |
| A007565_01 | 0.21      | 0.107     | -0.294 | 0.067     | 0.153     | -0.017 | 0.04      | 0.018  |
| A007567_01 | -0.124    | 0.281     | 0.227  | 0.213     | 0.035     | 0.079  | -0.13     | 0.09   |
| A007573_01 | 0.062     | 0.015     | 0.201  | 0.014     | 0.021     | -0.229 | 0.192     | 0.045  |
| A007575_01 | 0.503     | 0.61      | 0.277  | -0.244    | 0.105     | 0.418  | 0.148     | 0.058  |
| A007577_01 | -0.029    | 0.064 NA  |        | -0.251    | 0.13      | 0.441  | 0.263     | 0.242  |
| A007582_01 | 0.475     | 0.08      | 0.601  | -0.07     | 0.361     | 0.213  | 0.472 NA  |        |
| A007584_01 | -0.192    | -0.145    | -0.077 | -0.085    | -0.257    | -0.124 | -0.11     | 0.035  |
| A007589_01 | -0.308    | -0.271    | -0.318 | -0.155    | -0.013    | -0.007 | 0.053     | -0.005 |
| A007590_01 | 0.354     | 0.23      | 0.361  | 0.385 NA  |           | 0.48   | 0.137     | -0.079 |
| A007593_01 | 0.132     | 0.127     | -0.244 | -0.016    | -0.207    | -0.349 | -0.329    | -0.311 |
| A007596_01 | 0.232     | 0.223     | -0.086 | -0.676 NA |           | 0.442  | 0.088     | 0.078  |
| A007597_01 | 0.686     | 0.539     | 0.068  | -0.139    | 0.084     | 0.226  | 0.002     | -0.098 |
| A007599_01 | -0.729 NA |           | -0.38  | -0.358    | -0.256    | -0.275 | 0.207     | 0.135  |
| A007600_01 | -0.062    | -0.034    | -0.022 | 0.122     | 0.101     | -0.09  | 0.025     | 0.095  |
| A007604_01 | -0.931    | -1.122    | -0.808 | -0.604    | 0.012     | -0.139 | 0.147     | 0.139  |
| A007606_01 | -0.19     | -0.184    | -0.025 | 0.013     | 0.176     | -0.258 | -0.092    | -0.143 |
| A007616_01 | 0.352     | 0.402     | 0.359  | -0.168    | 0.129 NA  |        | 0.005 NA  |        |
| A007618_01 | -2.508    | -2.645    | -2.74  | -2.275    | -2.009    | -2.109 | -0.463    | -0.279 |
| A007620_01 | 0.306     | 0.372     | 0.275  | 0.077     | 0.143     | 0.252  | -0.058    | -0.053 |
| A007621_01 | -0.325    | -0.138    | -0.068 | 0.216     | -0.189    | -0.125 | -0.261    | -0.115 |
| A007622_01 | -0.325    | -0.278    | -0.217 | -0.101    | -0.2      | -0.593 | -0.267 NA |        |
| A007627_01 | 0.282     | 0.133     | -0.271 | 0.498     | -0.149    | -0.606 | 0         | -0.005 |
| A007630_01 | 0.251     | 0.208     | 0.303  | -0.04     | 0.261     | 0.288  | 0.343     | 0.031  |
| A007644_01 | 0.537     | 0.727     | 0.031  | 0.362     | 0.104     | 0.203  | -0.014    | 0.194  |
| A007646_01 | 0.14      | 0.202     | 0.393  | 0.524     | 0.351     | 0.408  | 0.329     | 0.422  |
| A007648_01 | -0.365    | -0.237    | -0.001 | -0.073    | -0.022    | -0.186 | -0.039    | 0.04   |

|            |           |           |          |        |           |          |           |        |
|------------|-----------|-----------|----------|--------|-----------|----------|-----------|--------|
| A007649_01 | -0.564    | -0.463    | -0.394   | -0.797 | -0.146    | -0.27    | -0.098    | -0.046 |
| A007651_01 | 0.582     | 0.533     | -0.067   | -0.166 | 0.308     | 0.224    | -0.095    | -0.003 |
| A007654_01 | 0.365     | 0.223     | 0.202    | 0.124  | 0.018     | -0.162   | 0.154     | 0.044  |
| A007656_01 | 1.316     | 1.346     | 1.103    | 1.268  | 0.361     | 1.14     | 0.342     | 0.497  |
| A007657_01 | 0.004     | -0.082    | 0.01     | 0.512  | 0.22      | 0.066    | 0.1       | -0.008 |
| A007659_01 | -0.073    | 0.02      | 0.126    | -0.066 | -0.006    | 0.072    | 0.175     | 0.104  |
| A007665_01 | 0.1       | -0.145    | 0.054    | 0.198  | -0.123    | -0.275   | -0.097    | -0.186 |
| A007680_01 | -0.303    | 0.01      | 0.041    | -0.393 | -0.02     | 0.212    | 0.046     | 0.201  |
| A007686_01 | -1.939 NA | NA        |          | -1.95  | -1.174    | -1.723   | -0.943    | -0.773 |
| A007696_01 | 0.292     | 0.401     | 0.373    | 0.186  | 0.348     | 0.666    | -0.071    | 0.117  |
| A007697_01 | 0.118     | 0.111     | 0.255    | -0.113 | 0.155 NA  |          | 0.148     | 0.195  |
| A007702_01 | -0.256    | -0.357    | -0.148   | -0.237 | 0.098     | -0.172   | 0.074     | 0.004  |
| A007704_01 | 0.527     | 0.713     | 0.124    | 0.243  | 0.166     | 0.187    | 0.172     | 0.176  |
| A007709_01 | -0.527    | -0.35     | -0.017   | -0.183 | -0.057    | -0.094   | -0.035    | -0.042 |
| A007714_01 | 0.066     | 0.047     | -0.066   | -0.069 | -0.187    | -0.019   | -0.107    | 0.065  |
| A007716_01 | -0.301    | -0.134 NA |          | 0.271  | 0.061     | 0.072    | -0.112 NA |        |
| A007723_01 | 0.314     | 0.233     | -0.154   | 0.205  | 0.158 NA  |          | -0.171 NA |        |
| A007725_01 | -0.109    | -0.051    | -0.266   | 0.174  | 0.041     | -0.1     | -0.038    | -0.034 |
| A007727_01 | 0.176     | 0.21      | -0.005   | -0.341 | 0.232 NA  |          | -0.279    | -0.158 |
| A007730_01 | 0.408     | 0.39      | 0.083    | 0.487  | -0.096 NA |          | -0.133    | -0.102 |
| A007733_01 | 0.481     | 0.394     | -0.089   | 0.126  | -0.1      | 0.057    | -0.102    | -0.083 |
| A007736_01 | 0.033     | 0.024     | 0.018    | -0.109 | -0.003    | -0.109   | 0 NA      |        |
| A007739_01 | 0.328     | 0.263     | -0.346   | 0.197  | -0.014    | 0.222    | 0.151     | 0.137  |
| A007744_01 | 0.192     | 0.078     | 0.303    | 0.28   | 0.066     | -0.357   | 0.103     | 0.135  |
| A007746_01 | -0.843    | -1.136    | -0.739   | -1.179 | -0.512    | -0.892   | -0.427    | -0.311 |
| A007749_01 | 0.543 NA  |           | -0.308   | 0.186  | 0.145 NA  |          | -0.073    | 0.011  |
| A007750_01 | 0.138     | 0.211     | -0.492   | -0.545 | 0.231     | 0.547    | -0.235    | -0.058 |
| A007753_01 | -0.424    | -0.639    | -0.495   | -0.364 | 0.016     | -0.049   | 0.058     | 0.068  |
| A007756_01 | 0.255     | 0.118     | 0.273    | 0.205  | 0.081     | 0.208    | 0.277     | 0.338  |
| A007757_01 | -0.538 NA | NA        |          | 0.301  | -0.343    | -0.227   | -0.342    | -0.065 |
| A007759_01 | 0.159     | 0.117     | 0.201    | 0.206  | 0.319     | 0.17     | -0.007    | 0.004  |
| A007762_01 | -0.118 NA |           | 0.087    | -0.182 | 0.176 NA  |          | 0.262     | 0.259  |
| A007765_01 | -0.307    | -0.088    | -0.149   | -0.032 | 0.009     | -0.066   | 0.081 NA  |        |
| A007766_01 | -0.109    | 0.231     | 0.153    | -0.359 | -0.074    | 0.027    | -0.016 NA |        |
| A007767_01 | -0.336    | -0.152    | -0.022   | -0.366 | -0.181    | -0.055   | 0.052     | 0.148  |
| A007768_01 | 0.706     | 0.787     | 0.449    | 0.307  | 0.518     | 0.602    | 0.266     | 0.182  |
| A007770_01 | -0.529    | -0.4      | -0.705   | -0.64  | -0.366 NA |          | -0.327    | -0.099 |
| A007776_01 | 0.062     | -0.017    | -0.084   | -0.194 | -0.275    | -0.551   | 0.057 NA  |        |
| A007778_01 | -0.291    | -0.39     | -0.196   | -0.429 | 0.025     | -0.125   | -0.009    | -0.079 |
| A007781_01 | -0.133    | -0.249    | -0.229   | -0.571 | 0.39      | 0.446    | -0.2      | -0.154 |
| A007786_01 | -0.003    | -0.142    | -0.131   | -0.381 | 0.212     | 0.31     | 0.039     | 0.01   |
| A007791_01 | 0.031     | -0.028    | 0        | -0.044 | 0.088     | -0.102   | 0.057     | 0.014  |
| A007792_01 | -0.072    | -0.026    | 0.195    | 0.148  | -0.141    | -0.12    | -0.117    | -0.138 |
| A007793_01 | 0.241     | 0.142     | 0.158 NA |        | 0.081     | 0.133    | 0.04 NA   |        |
| A007794_01 | -0.21     | 0.102     | 0.3      | 0.086  | 0.094     | 0.371    | 0.388     | 0.4    |
| A007795_01 | 0.462     | 0.638     | 0.634    | 0.858  | 0.463     | 0.618    | 0.564 NA  |        |
| A007797_01 | 1.815     | 1.753     | 1.351    | 1.63   | 0.933     | 1.24     | 0.47      | 0.578  |
| A007798_01 | -0.009    | 0.17      | -1.256   | -1.084 | 0.124     | 0.103    | -0.428    | -0.291 |
| A007801_01 | 0.669     | 0.804     | 0.275    | -0.154 | 0.06      | 0.286    | 0.026     | -0.043 |
| A007804_01 | -0.31     | -0.191    | 0.094    | 0.479  | -0.128    | -0.286   | 0.102     | 0.242  |
| A007805_01 | 0.005     | 0.027     | 0.142    | 0.222  | 0.072     | -0.126   | 0.262     | 0.012  |
| A007806_01 | 0.861     | 0.759     | 0.517    | 0.159  | 0.249     | 0.615    | 0.47      | 0.424  |
| A007808_01 | 0.449     | 0.51      | 0.377    | 0.267  | 0.21      | 0.303    | -0.051    | -0.044 |
| A007809_01 | -0.039    | -0.038    | 0.259    | 0.008  | -0.008    | 0.063    | -0.063    | -0.091 |
| A007810_01 | 0.266     | 0.804     | 0.351    | 0.198  | 0.296     | 0.514    | 0.296     | 0.197  |
| A007811_01 | -0.005    | -0.06     | 0.053    | 0.205  | -0.271    | -0.594   | 0.056     | -0.054 |
| A007812_01 | -1.516    | -1.949    | -0.611   | -1.013 | -0.709    | -1.206   | -0.158    | -0.135 |
| A007814_01 | -0.635    | -0.578    | -0.458   | -0.216 | -0.289    | -0.567   | -0.248    | -0.219 |
| A007815_01 | -0.894    | -0.901    | 0.074    | 0.675  | -1.064    | -1.343   | -0.182    | 0.104  |
| A007816_01 | -0.009    | -0.223    | 0.237    | 0.763  | -0.311    | -0.425   | 0.009     | 0.268  |
| A007817_01 | -0.104    | 0.046     | -1.101   | -0.94  | 0.241     | 0.33     | -0.244    | -0.249 |
| A007820_01 | -0.658    | -0.623 NA |          | 0.515  | 0.468     | 0.512 NA |           | 0.233  |
| A007823_01 | -0.208    | -0.031    | -0.416   | 0.135  | -0.121    | 0.047    | -0.136    | 0.022  |
| A007827_01 | -0.109    | -0.074    | -0.346   | -0.393 | 0.131     | 0.244    | 0.07      | 0.097  |
| A007829_01 | -0.588    | -0.604    | -1.071   | -0.654 | -0.167    | -0.059   | -0.347    | -0.219 |
| A007830_01 | -0.255    | -0.392    | -0.401   | -0.889 | 0.03      | -0.383   | -0.283    | -0.361 |
| A007832_01 | -0.075    | -0.317    | -0.132   | -0.088 | -0.03     | -0.082   | -0.092    | -0.131 |
| A007833_01 | -0.237    | -0.038    | -0.128   | 0.158  | -0.198 NA |          | 0.202     | 0.292  |

|            |           |           |        |           |           |        |           |        |
|------------|-----------|-----------|--------|-----------|-----------|--------|-----------|--------|
| A007834_01 | -0.204    | -0.094    | -0.173 | -0.018    | -0.099    | 0.048  | -0.073 NA |        |
| A007835_01 | -0.153    | -0.213    | -0.562 | -0.127    | -0.088    | 0.149  | -0.186    | -0.232 |
| A007836_01 | 0.864     | 0.746     | 0.95   | 0.682     | 0.429     | 0.503  | -0.233 NA |        |
| A007840_01 | 0.235     | 0.07      | 0.096  | 0.036     | -0.068    | -0.022 | -0.217    | -0.402 |
| A007844_01 | -0.071    | -0.148    | -0.374 | -0.331    | -0.088    | -0.041 | -0.178    | -0.14  |
| A007846_01 | -0.388    | -0.147    | -0.172 | 0.084     | -0.098    | 0.048  | -0.205    | -0.138 |
| A007848_01 | -0.086    | -0.076    | -0.056 | 0.222     | 0.095     | 0.114  | -0.03     | -0.003 |
| A007850_01 | -0.154    | -0.114    | -0.211 | -0.209    | 0.136     | 0.237  | 0.002     | 0.062  |
| A007852_01 | 0.21      | 0.213     | 0.121  | -0.011    | 0.269     | 0.27   | 0.017     | -0.005 |
| A007859_01 | -0.567    | -0.523    | -0.684 | -0.267    | -0.088    | -0.037 | -0.483    | -0.501 |
| A007860_01 | -0.736    | -0.829    | -1.264 | -1.23     | -0.051    | 0.018  | -0.472    | -0.367 |
| A007862_01 | 0.227     | 0.272     | -0.055 | -0.111    | 0.084     | -0.088 | -0.024    | 0.042  |
| A007865_01 | -0.148    | -0.089    | -0.127 | -0.077    | 0.048     | -0.017 | 0.06      | -0.004 |
| A007868_01 | -0.062    | -0.187    | 0.058  | 0.402     | 0.085     | -0.181 | -0.094    | -0.299 |
| A007870_01 | 0.232     | 0.124     | -0.033 | 0.148     | -0.126    | -0.082 | -0.057    | -0.083 |
| A007871_01 | -0.009    | -0.307    | -0.032 | 0.228     | 0.017     | -0.076 | -0.072    | -0.073 |
| A007873_01 | -0.012    | -0.046    | 0.058  | 0.027     | -0.089    | -0.245 | -0.127 NA |        |
| A007875_01 | 0.149     | 0.057     | -0.147 | 0.353     | 0.273     | 0.108  | -0.04     | -0.058 |
| A007876_01 | -0.595    | -0.678    | -0.057 | -0.103    | 0.048     | -0.095 | 0.343     | 0.015  |
| A007877_01 | -0.083    | 0.084     | -0.047 | -0.395    | 0.142     | 0.269  | 0         | -0.008 |
| A007878_01 | 0.295     | 0.266     | 0.445  | -0.223    | 0.377     | 0.454  | 0.169     | 0.038  |
| A007880_01 | -0.186    | -0.172    | -0.117 | -0.054    | -0.073    | -0.136 | -0.213    | -0.239 |
| A007883_01 | -0.29     | -0.406    | -0.086 | 0.331     | -0.062    | -0.121 | -0.213    | -0.099 |
| A007885_01 | 0.137     | 0.267     | 0.214  | 0.218     | 0.135     | 0.168  | 0.1 NA    |        |
| A007886_01 | -0.14     | 0.107     | 0.108  | -0.06     | 0.138     | 0.018  | -0.184    | 0.055  |
| A007891_01 | -0.745    | -0.821    | -0.241 | -0.148    | -0.478    | -0.72  | -0.143    | -0.209 |
| A007892_01 | -0.212    | -0.412    | 0.409  | 0.468     | 0.144 NA  |        | 0.619     | 0.45   |
| A007893_01 | 0.592     | 0.398     | 0.012  | -0.283 NA | NA        |        | 0.238     | 0.088  |
| A007894_01 | -0.253    | -0.078    | 0.132  | 0.087     | -0.184    | -0.081 | -0.01     | 0.148  |
| A007896_01 | 0.418     | 0.277     | -0.118 | -0.243    | 0.123     | 0.083  | -0.162    | -0.098 |
| A007897_01 | -1        | -1.063 NA |        | -0.58     | -0.36     | -0.581 | -0.698    | -0.621 |
| A007898_01 | -1.051    | -1.296    | -1.012 | -0.803    | -0.784    | -0.961 | -0.268    | -0.309 |
| A007899_01 | -0.257    | -0.021    | 0.061  | 0.066     | -0.139    | -0.307 | -0.113    | -0.075 |
| A007901_01 | 0.357     | 0.178     | -0.069 | 0.26      | 0.089     | 0.014  | 0.147     | 0.108  |
| A007902_01 | -0.211    | -0.271    | -0.023 | -0.042    | -0.089    | -0.153 | -0.064    | -0.239 |
| A007903_01 | 0.086     | -0.108    | -0.12  | 0.163     | -0.216    | -0.287 | -0.029    | -0.107 |
| A007905_01 | -0.197    | -0.158    | -0.26  | -0.283    | -0.165    | -0.073 | 0.798     | 0.564  |
| A007906_01 | -0.461    | -0.329    | -0.3   | -0.352    | -0.031    | -0.114 | 0.164     | 0.092  |
| A007923_01 | 0.241     | 0.237     | -0.224 | -0.003    | 0.072     | 0.03   | -0.036    | -0.3   |
| A007924_01 | 0.305     | 0.204     | 0.153  | 0.075 NA  |           | -0.11  | 0.049     | 0.041  |
| A007925_01 | 0.611     | 0.443     | 0.257  | 0.444     | 0.234     | 0.358  | 0.268     | 0.097  |
| A007926_01 | -0.763    | -0.176    | 0.547  | -0.111    | -0.401    | -0.103 | 0.062     | 0.47   |
| A007929_01 | -0.11     | 0.061     | 0.016  | 0.061     | -0.166    | -0.174 | 0.007     | 0.012  |
| A007930_01 | 0.386     | 0.384     | -0.184 | 0.362     | 0         | -0.024 | -0.303    | -0.244 |
| A007931_01 | 0.035     | 0.276     | -0.231 | 0.522     | -0.151    | -0.13  | -0.413    | -0.119 |
| A007932_01 | -0.022 NA |           | -0.237 | 0.225     | -0.202    | -0.023 | 0.103     | 0.088  |
| A007934_01 | 0.125     | 0.136     | 0.216  | 0.216     | -0.055    | -0.221 | 0.187     | 0.08   |
| A007939_01 | 0.428     | 0.406     | 0.126  | -0.085    | 0.155     | -0.113 | 0.085     | 0.059  |
| A007941_01 | -0.408    | -0.403    | -0.445 | 0.25      | -0.023    | -0.134 | -0.235    | -0.173 |
| A007942_01 | -0.11     | 0.033     | -0.3   | -0.417    | -0.321    | -0.189 | -0.12     | -0.011 |
| A007945_01 | -0.214    | -0.294    | 0.124  | 0.275     | -0.134    | -0.268 | -0.091    | -0.049 |
| A007947_01 | -0.651    | -0.511    | -0.225 | -0.145    | -0.194    | -0.375 | 0.027     | 0.019  |
| A007949_01 | -0.08     | -0.161    | 0.115  | 0.481     | -0.281    | -0.563 | -0.393    | -0.106 |
| A007950_01 | 0.747     | 0.745     | 0.386  | -0.039    | 0.113     | 0.368  | -0.039    | -0.003 |
| A007951_01 | 0.024     | -0.117    | -0.466 | 0.005     | -0.153    | -0.138 | -0.193    | -0.223 |
| A007952_01 | -0.08     | -0.082    | -0.215 | -0.27     | -0.217    | -0.189 | 0.057     | 0.127  |
| A007953_01 | -0.074    | 0.012     | -0.053 | 0.283     | -0.23     | -0.211 | -0.251    | -0.031 |
| A007954_01 | -0.407    | -0.63 NA  | NA     |           | 0.12      | -0.031 | -0.046    | -0.017 |
| A007955_01 | -0.056    | -0.183    | 0.198  | 0.443     | -0.264    | -0.473 | -0.171    | -0.178 |
| A007959_01 | 0.115     | -0.014    | 0.223  | -0.303    | 0.106     | 0.138  | -0.17     | -0.176 |
| A007961_01 | 0.038     | 0.149     | 0.06   | -0.08     | -0.168    | 0.073  | 0.151     | 0.379  |
| A007964_01 | 0.295     | 0.535     | 0.918  | 1.148     | -0.25     | -0.542 | 0.606     | 0.494  |
| A007966_01 | -0.038    | 0.024     | 0.092  | -0.31     | 0.346     | 0.394  | 0.146     | 0.271  |
| A007967_01 | -0.324    | -0.361    | 0.103  | -0.219    | -0.059    | -0.186 | 0.2       | 0.201  |
| A007969_01 | -0.626    | -0.574    | -0.068 | -0.085    | -0.132    | -0.016 | -0.121    | -0.112 |
| A007971_01 | -0.606    | -0.896    | -0.075 | -0.607 NA |           | -0.391 | -0.09     | 0.08   |
| A007973_01 | -0.282 NA |           | -0.366 | -0.528    | -0.195 NA |        | -0.204    | -0.173 |
| A007974_01 | -1.202    | -1.016    | -1.185 | -0.582    | -0.41     | -0.304 | 0.211     | 0.26   |



|            |        |        |        |        |        |        |        |        |
|------------|--------|--------|--------|--------|--------|--------|--------|--------|
| A007975_01 | 0.332  | 0.326  | 0.61   | 0.886  | -0.036 | -0.281 | -0.413 | -0.436 |
| A007977_01 | 0.484  | 0.542  | -0.139 | -0.022 | -0.102 | 0.402  | 0.011  | 0.222  |
| A007981_01 | 0.118  | 0.185  | 0.435  | 0.679  | -0.521 | -0.162 | 0.297  | 0.511  |
| A007982_01 | -0.075 | -0.158 | 0.122  | 0.512  | 0.212  | 0.005  | 0.087  | 0.131  |
| A007983_01 | -0.227 | -0.238 | -0.638 | -0.051 | -0.059 | -0.174 | -0.226 | NA     |
| A007988_01 | 0.16   | -0.079 | 0      | 0.146  | 0.367  | 0.225  | -0.128 | -0.16  |
| A007989_01 | -0.111 | -0.036 | -0.049 | NA     | 0.128  | 0.196  | -0.079 | NA     |
| A007993_01 | 0.844  | 0.805  | 0.342  | 0.148  | 0.279  | 0.494  | 0.306  | 0.123  |
| A007994_01 | -0.209 | 0.036  | 0.115  | -0.099 | -0.259 | -0.138 | -0.041 | 0.006  |
| A007998_01 | -0.074 | -0.059 | 0.253  | 0.558  | 0.073  | 0.134  | -0.13  | -0.143 |
| A008004_01 | -0.309 | -0.176 | -0.297 | -0.332 | -0.164 | -0.038 | -0.026 | -0.233 |
| A008005_01 | -0.081 | 0.082  | NA     | NA     | 0.174  | -0.074 | -0.232 | NA     |
| A008007_01 | 0.754  | 0.886  | 0.622  | 0.542  | 0.423  | 0.482  | 0.277  | 0.206  |
| A008009_01 | 0.016  | 0.052  | -0.318 | 0.246  | -0.352 | -0.26  | -0.209 | NA     |
| A008010_01 | -0.111 | 0.117  | 0.195  | 0.439  | -0.102 | -0.266 | -0.271 | -0.293 |
| A008012_01 | 0.259  | 0.227  | 0.363  | -0.06  | 0.254  | 0.034  | 0.176  | 0.175  |
| A008014_01 | 0.155  | 0.326  | 0.057  | 0.032  | 0.116  | 0.219  | -0.221 | NA     |
| A008017_01 | 0.311  | 0.374  | 0.064  | -0.016 | -0.17  | -0.198 | -0.008 | -0.03  |
| A008018_01 | -0.136 | -0.278 | -0.409 | 0.166  | -0.245 | -0.135 | -0.217 | -0.096 |
| A008026_01 | 0.367  | 0.447  | -0.163 | 0.143  | 0.082  | 0.272  | -0.083 | 0.372  |
| A008027_01 | 0.122  | 0.027  | 0.227  | 0.219  | 0.06   | -0.098 | -0.027 | -0.04  |
| A008033_01 | -0.159 | -0.162 | -0.415 | 0.235  | -0.051 | -0.301 | -0.041 | -0.034 |
| A008035_01 | -0.089 | -0.114 | 0.025  | 0.336  | 0.046  | -0.044 | -0.109 | 0.053  |
| A008036_01 | -0.028 | -0.031 | 0.06   | 0.165  | 0.021  | -0.18  | 0.008  | -0.07  |
| A008038_01 | 0.058  | 0.027  | 0.082  | -0.058 | -0.059 | 0.179  | 0.114  | 0.209  |
| A008039_01 | 0.471  | 0.268  | 0.158  | -0.152 | 0.075  | 0.412  | 0.2    | 0.349  |
| A008042_01 | -0.563 | -0.592 | -0.457 | -0.692 | -0.353 | -0.371 | 0.03   | -0.024 |
| A008043_01 | -0.456 | -0.367 | -1.084 | -0.59  | -0.184 | -0.297 | -0.6   | NA     |
| A008044_01 | 0.137  | 0.094  | 0.109  | 0.05   | -0.104 | NA     | -0.202 | NA     |
| A008047_01 | 0.569  | 0.54   | 0.491  | 0.43   | 0.274  | 0.484  | 0.198  | 0.231  |
| A008049_01 | 0.379  | 0.421  | -0.069 | -0.588 | -0.035 | 0.108  | 0.158  | -0.078 |
| A008052_01 | -0.514 | -0.848 | -0.067 | 0.123  | -0.137 | -0.696 | 0.069  | 0.027  |
| A008053_01 | 0.202  | 0.288  | -0.135 | -0.029 | -0.088 | 0.301  | 0.002  | 0.267  |
| A008055_01 | -0.272 | 0.072  | 0.222  | 0.389  | -0.607 | -0.579 | -0.397 | -0.068 |
| A008056_01 | 0.346  | -0.047 | 0.326  | 0.225  | -0.225 | -0.503 | -0.482 | -0.15  |
| A008060_01 | 0.145  | 0.099  | 0.378  | 0.49   | 0.056  | -0.247 | -0.117 | 0.094  |
| A008068_01 | -0.301 | -0.393 | 0.116  | 0.032  | -0.065 | -0.17  | -0.235 | NA     |
| A008070_01 | 0.072  | 0.315  | -0.034 | -0.356 | -0.055 | 0.09   | 0.201  | 0.129  |
| A008074_01 | 0.021  | 0.206  | 0.041  | -0.098 | 0.167  | 0.176  | -0.033 | 0.231  |
| A008081_01 | 0.231  | 0.354  | 0      | 0.106  | 0.02   | -0.042 | -0.089 | -0.126 |
| A008083_01 | 0.207  | 0.055  | -0.166 | -0.28  | 0.005  | 0.373  | 0.139  | 0.053  |
| A008087_01 | -0.697 | -0.275 | -0.177 | 0.178  | -0.264 | -0.09  | -0.154 | 0.222  |
| A008088_01 | 0.317  | 0.432  | -0.062 | -0.141 | -0.02  | 0.179  | -0.32  | -0.248 |
| A008089_01 | 0.016  | -0.015 | -0.636 | 0.09   | 0.155  | -0.067 | -0.65  | -0.446 |
| A008090_01 | 0.233  | 0.043  | -0.064 | 0.058  | 0.076  | -0.009 | 0.038  | -0.157 |
| A008092_01 | 0.247  | 0.084  | 0.1    | 0.063  | 0.138  | 0.062  | 0.158  | 0.014  |
| A008094_01 | 0.359  | 0.458  | NA     | NA     | 0.255  | 0.074  | -0.13  | -0.143 |
| A008107_01 | 0.103  | -0.024 | -0.235 | -0.057 | 0.142  | -0.172 | 0.157  | -0.012 |
| A008119_01 | -0.922 | -0.551 | -0.353 | -0.126 | -0.415 | -0.456 | -0.446 | NA     |
| A008122_01 | -0.585 | 0.013  | -0.18  | NA     | -0.374 | -0.011 | -0.41  | NA     |
| A008127_01 | 0.091  | 0.012  | -0.117 | 0.126  | 0.09   | 0.173  | -0.089 | NA     |
| A008130_01 | 0.002  | -0.189 | 0.125  | NA     | 0.147  | -0.103 | 0.088  | NA     |
| A008131_01 | 0.564  | 0.706  | -0.586 | 0.25   | -0.228 | 0.186  | -0.251 | -0.164 |
| A008132_01 | 0.375  | 0.371  | 0.047  | 0.08   | 0.063  | 0.173  | -0.097 | -0.097 |
| A008133_01 | 0.425  | 0.191  | -0.112 | -0.29  | 0.223  | 0.34   | 0.284  | 0.153  |
| A008135_01 | -0.161 | 0.133  | -0.097 | -0.221 | -0.167 | -0.019 | -0.264 | 0.028  |
| A008136_01 | 0.101  | 0.075  | 0.02   | -0.3   | 0.041  | 0.141  | 0.175  | 0.039  |
| A008137_01 | -0.496 | 0.086  | NA     | -0.237 | 0.054  | 0.461  | -0.086 | 0.305  |
| A008139_01 | -0.153 | -0.313 | -0.143 | -0.01  | -0.251 | -0.389 | -0.303 | NA     |
| A008143_01 | 0.161  | 0.405  | 0.321  | 0.319  | -0.047 | -0.246 | -0.06  | -0.111 |
| A008148_01 | -0.167 | -0.147 | 0.129  | -0.057 | 0.106  | 0.117  | 0.091  | 0.17   |
| A008153_01 | -0.202 | -0.083 | NA     | NA     | -0.039 | -0.119 | -0.1   | 0.091  |
| A008161_01 | 0.136  | 0.184  | 0.013  | 0.074  | -0.076 | 0.241  | 0.018  | -0.011 |
| A008164_01 | 0.418  | 0.397  | 0.162  | 0.108  | 0.262  | 0.283  | 0.093  | NA     |
| A008165_01 | -0.493 | -0.176 | -0.195 | 0.087  | 0.103  | 0.067  | 0.157  | 0.371  |
| A008166_01 | -0.687 | 0.017  | 0.279  | 0.06   | -0.415 | 0.021  | -0.081 | 0.369  |
| A008170_01 | 0.19   | NA     | 0.125  | -0.205 | -0.013 | NA     | 0.138  | 0.006  |
| A008172_01 | -0.428 | -0.49  | 0.135  | -0.139 | -0.059 | -0.228 | 0.16   | 0.14   |

|            |           |           |           |        |           |        |           |        |
|------------|-----------|-----------|-----------|--------|-----------|--------|-----------|--------|
| A008173_01 | -0.028    | -0.044    | -0.145    | -0.115 | 0.054     | -0.055 | -0.033    | -0.115 |
| A008179_01 | -0.096    | -0.23     | -0.584    | 0.027  | -0.151    | -0.241 | -0.217    | -0.204 |
| A008182_01 | 0.777     | 0.896     | -0.243    | -0.781 | 0.475     | 0.741  | -0.093    | 0.038  |
| A008183_01 | 0.428     | 0.488     | 0.137     | 0.155  | 0.282     | 0.275  | 0.011     | 0.122  |
| A008184_01 | -0.132    | -0.06     | -0.077    | -0.175 | -0.231    | -0.159 | 0.038     | -0.077 |
| A008191_01 | -0.905    | -0.986    | -0.17     | -0.5   | -0.317    | -0.323 | -0.092    | 0.29   |
| A008198_01 | -0.143    | -0.266    | -0.155    | 0.063  | -0.301    | -0.397 | 0.043     | 0.043  |
| A008201_01 | -0.005    | 0.048     | -0.607    | 0.076  | 0.22      | 0.247  | -0.022    | 0.119  |
| A008202_01 | -0.249    | -0.111    | -0.116    | 0.261  | -0.023    | -0.076 | -0.079    | 0.025  |
| A008212_01 | -0.526    | -0.361    | -0.254    | 0.073  | -0.333    | -0.178 | -0.544    | -0.09  |
| A008213_01 | -0.184    | -0.165    | -0.26     | 0.251  | 0.034     | 0.025  | -0.072    | -0.073 |
| A008214_01 | -0.432    | -0.451 NA |           | -0.24  | -0.242    | 0.026  | -0.66     | -0.384 |
| A008215_01 | -0.227    | -0.261    | -0.795 NA |        | 0.044     | -0.06  | -0.366 NA |        |
| A008218_01 | -0.001    | -0.346    | -0.326    | -0.028 | -0.023    | -0.095 | -0.104    | -0.209 |
| A008221_01 | -0.224 NA |           | -0.241    | 0.08   | -0.027 NA |        | 0.032     | -0.072 |
| A008245_01 | -0.25     | 0.012     | 0.28      | -0.092 | -0.181    | -0.184 | 0.155     | 0.03   |
| A008247_01 | -0.178    | 0.069     | 0.1       | -0.408 | 0.043     | 0.157  | 0.062     | 0.083  |
| A008251_01 | -0.61     | 0.003     | 0.542     | -0.131 | -0.215    | -0.04  | 0.121     | 0.395  |
| A008252_01 | -0.901    | -1.069    | -1.286    | -1.436 | -0.477    | -0.566 | -0.983 NA |        |
| A008254_01 | 0.301     | 0.211     | 0.3       | -0.096 | -0.537 NA |        | 0.147     | 0.35   |
| A008260_01 | -0.153    | -0.467    | -0.087    | 0.151  | 0.06      | -0.051 | -0.369 NA |        |
| A008262_01 | -0.344    | -0.526    | -0.619    | -0.094 | 0.067     | 0.116  | 0.068     | 0.12   |
| A008268_01 | 0.31      | 0.251     | 0.321     | 0.13   | 0.186     | 0.002  | -0.192    | -0.408 |
| A008270_01 | -0.61     | -0.565    | -0.776    | -1.035 | -0.241    | -0.26  | -0.354 NA |        |
| A008271_01 | -0.052    | -0.003    | 0.099     | 0.136  | 0.091     | 0.014  | 0.029     | 0.038  |
| A008272_01 | -0.308    | -0.383 NA |           | -0.987 | -0.183    | -0.061 | -0.407    | -0.377 |
| A008277_01 | 0.133     | 0.152     | 0.044     | 0.115  | 0.225     | 0.204  | 0.129     | 0.11   |
| A008280_01 | 0.047     | -0.001    | -0.292    | -0.756 | 0.139     | -0.062 | -0.931    | -1.128 |
| A008281_01 | -0.218    | -0.049    | 0.258     | 0.176  | 0.034     | 0.01   | 0.116     | 0.338  |
| A008283_01 | -0.173    | -0.298    | -0.144 NA |        | 0.028     | -0.168 | 0.144     | -0.02  |
| A008289_01 | 0.043     | 0.128     | -0.064    | 0.216  | 0.225     | 0.185  | 0.093     | 0.191  |
| A008290_01 | 0.08      | 0.083     | -0.16     | 0.237  | 0.125     | 0.249  | -0.065    | 0.069  |
| A008291_01 | -0.028    | 0.036     | -0.1      | 0.161  | 0.088     | 0.097  | -0.205    | -0.133 |
| A008292_01 | 0.459     | 0.317     | 0.591     | 0.445  | 0.248     | 0.1    | -0.014    | -0.16  |
| A008300_01 | -0.041    | -0.19     | -0.09     | 0.018  | -0.078    | -0.022 | -0.016 NA |        |
| A008301_01 | -0.065    | 0.104     | -0.143    | 0.202  | 0.225     | 0.263  | 0.059     | 0.125  |
| A008302_01 | 0.125     | 0.166     | 0.021     | 0.337  | 0.249     | 0.255  | -0.017    | 0.187  |
| A008303_01 | 0.353     | 0.346     | 0.218     | 0.569  | 0.428     | 0.561  | -0.286    | -0.356 |
| A008305_01 | -0.328    | -0.526    | -0.789    | 0.374  | -2.144    | -2.716 | -2.165 NA |        |
| A008308_01 | 0.449     | 0.332     | 0.457     | 0.182  | 0.114     | 0.173  | 0.066     | 0.069  |
| A008310_01 | -0.029    | 0.248     | -0.109    | -0.041 | 0.027     | 0.042  | -0.258    | -0.094 |
| A008312_01 | -0.468    | -0.773    | -0.163    | -0.492 | -0.232    | -0.43  | -0.047    | 0.076  |
| A008313_01 | 0.34      | 0.378     | 0.039     | 0.211  | 0.146     | 0.144  | 0.069     | 0.15   |
| A008314_01 | 0.135     | 0.107     | -0.073    | 0.268  | 0.045     | 0.089  | 0.002     | 0.025  |
| A008315_01 | -0.437    | -0.408    | 0.119     | 0.46   | -0.152    | -0.385 | -0.093    | -0.077 |
| A008321_01 | -0.048    | 0.02      | 0.044     | -0.074 | 0.114     | -0.073 | -0.135    | -0.098 |
| A008325_01 | 0.097     | -0.051    | 0.059     | 0.26   | 0.142     | -0.021 | -0.034    | 0.13   |
| A008326_01 | 0.021     | 0.011     | -0.029    | 0.217  | 0.193     | 0.139  | 0.167     | 0.194  |
| A008327_01 | 0.066     | 0.035     | -0.198    | 0.209  | 0.058     | 0.134  | 0.051     | 0.166  |
| A008329_01 | -0.043    | -0.013    | 0.175     | -0.006 | -0.034    | -0.139 | -0.118    | -0.184 |
| A008330_01 | -0.26     | -0.535    | -0.755    | -1.072 | -0.166    | -0.251 | -0.323    | -0.305 |
| A008335_01 | 0.153     | 0.28      | 0.004     | 0.618  | -0.125    | -0.214 | -0.125    | 0.129  |
| A008336_01 | 0.258     | 0.359     | -0.042    | 0.028  | -0.024    | 0.285  | -0.151    | -0.092 |
| A008338_01 | -0.018    | 0.011     | -0.125    | 0.172  | 0.097     | 0.038  | -0.085    | 0.078  |
| A008339_01 | -0.097    | -0.153    | -0.265    | 0.128  | 0.054     | -0.004 | -0.031    | 0.055  |
| A008342_01 | 0.005     | -0.078    | -0.055    | -0.39  | 0.235     | 0.095  | -0.054 NA |        |
| A008350_01 | 0.008     | -0.013    | 0.014     | 0.359  | -0.13     | -0.26  | -0.365 NA |        |
| A008351_01 | -0.105    | -0.057    | -0.156    | 0.22   | -0.079    | -0.046 | -0.08     | 0.076  |
| A008356_01 | 0.193     | -0.064    | -0.058    | 0.114  | -0.011    | -0.126 | -0.024    | 0.04   |
| A008358_01 | 0.427     | 0.357     | 0.15      | 0.484  | 0.102     | 0.214  | -0.009    | 0.035  |
| A008368_01 | -0.384    | -0.126    | 0.006     | 0.247  | -0.056    | -0.004 | -0.154    | -0.039 |
| A008372_01 | 0.131     | 0.34 NA   |           | -0.603 | 0.216     | 0.47   | 0.052     | 0.057  |
| A008377_01 | -0.139    | -0.04     | 0.17      | 0.003  | -0.035    | -0.308 | -0.248 NA |        |
| A008379_01 | 0.545     | 0.748     | -0.237    | -0.118 | 0.05      | 0.52   | -0.039    | 0.114  |
| A008381_01 | 0.004 NA  | NA        |           | 0.159  | 0.045 NA  |        | 0.102     | 0.095  |
| A008382_01 | 0.075     | 0.032     | 0.066     | 0.434  | 0.076     | -0.204 | 0.011 NA  |        |
| A008386_01 | -0.128    | -0.384    | -0.146    | -0.084 | -0.229    | -0.371 | 0.244     | 0.077  |
| A008390_01 | 0.088     | -0.139    | 0.057     | -0.379 | 0.11      | 0.263  | -0.034    | -0.025 |

|            |           |           |        |          |           |        |           |        |
|------------|-----------|-----------|--------|----------|-----------|--------|-----------|--------|
| A008391_01 | -0.068    | -0.058    | 0.201  | 0.691    | 0.622     | 0.907  | 0.168     | 0.211  |
| A008394_01 | 0.56      | 0.605     | 0.049  | 0.181    | -0.134    | 0.298  | 0.216     | 0.181  |
| A008397_01 | -0.286    | -0.05     | -0.113 | -0.325   | -0.173    | -0.122 | 0         | 0.173  |
| A008398_01 | 0.166     | 0.335     | 0.268  | 0.166    | 0.177     | 0.146  | 0.121     | 0.154  |
| A008408_01 | -0.073 NA |           | -0.116 | -0.576   | 0.162 NA  |        | 0.119     | 0.032  |
| A008414_01 | -0.559    | 0.092     | 0.478  | -0.092   | -0.354    | 0.031  | 0.003     | 0.445  |
| A008415_01 | 0.877     | 0.905     | 1.449  | 1.607    | 0.699     | 0.864  | 0.29      | 0.314  |
| A008423_01 | -0.268    | -0.049 NA |        | -0.402   | 0.724     | 1.059  | -0.601 NA |        |
| A008432_01 | 0.088     | 0.027     | 0.192  | -0.12    | -0.157    | -0.229 | -0.099    | -0.154 |
| A008441_01 | 0.084     | 0.124     | -0.094 | -0.013   | 0.035     | 0.222  | -0.018    | 0.037  |
| A008445_01 | 0.171     | 0.153     | 0.05   | 0.098    | -0.159    | -0.276 | -0.14     | 0.076  |
| A008446_01 | 0.008     | -0.186    | -0.12  | 0.009    | -0.002    | -0.106 | -0.006    | -0.034 |
| A008448_01 | 0.202     | 0.483     | 0.217  | 0.542    | 0.009     | -0.096 | -0.303    | -0.264 |
| A008449_01 | 0.465     | 0.376     | 0.323  | 0.661    | 0.056     | -0.23  | -0.01     | -0.181 |
| A008452_01 | -0.099    | 0.023     | 0.046  | 0.425    | -0.061    | -0.157 | -0.384    | -0.115 |
| A008453_01 | 0.285     | 0.312     | 0.573  | -0.102   | 0.327     | 0.41   | 0.036     | -0.083 |
| A008454_01 | 0.25      | 0.136     | 0.338  | -0.152   | -0.062    | 0.122  | -0.056    | -0.007 |
| A008459_01 | -0.854    | -0.928    | -0.94  | -0.593   | -0.164    | -0.16  | -0.365    | -0.455 |
| A008463_01 | -0.42 NA  |           | 0.108  | 0.381 NA | NA        |        | 0.138     | 0.201  |
| A008472_01 | -1.536    | -2.21     | -1.308 | -1.782   | -1.639    | -2.528 | -0.785    | -1.015 |
| A008473_01 | 0.294     | 0.285     | -0.118 | 0.105    | -0.15     | 0.03   | -0.132    | 0.093  |
| A008475_01 | -0.48     | -0.514    | -0.392 | 0.207    | -0.278    | -0.242 | -0.275    | -0.137 |
| A008481_01 | 0.226     | 0.492     | 0.302  | -0.339   | -0.011 NA |        | 0.294     | 0.303  |
| A008483_01 | 0.221     | 0.294     | 0.09   | -0.132   | 0.071     | 0.078  | -0.15 NA  |        |
| A008485_01 | -0.289    | -0.358    | 0.057  | -0.369   | -0.074    | -0.377 | -0.206    | -0.226 |
| A008486_01 | 0.287     | 0.157     | 0.167  | 0.435    | -0.008    | -0.086 | -0.115    | 0.064  |
| A008499_01 | 0.047     | 0.294     | 0.097  | 0.175    | -0.237    | -0.234 | 0.062     | 0.135  |
| A008500_01 | -0.522    | -0.605    | -0.445 | -1.158   | -0.169    | -0.094 | -0.15     | -0.083 |
| A008505_01 | -0.47     | -0.465    | -0.525 | 0.252    | -0.205 NA |        | -0.169    | 0.071  |
| A008507_01 | -0.024    | 0.021     | 0.232  | -0.167   | -0.172    | -0.165 | -0.332    | -0.268 |
| A008511_01 | -0.325    | -0.109    | 0.027  | 0.464    | -0.315    | -0.346 | -0.416    | 0.009  |
| A008512_01 | 0.953     | 0.88      | -0.445 | 0.447    | -0.512    | -0.089 | -0.216    | -0.281 |
| A008514_01 | 0.052     | 0.098     | 0.006  | -0.177   | 0.014     | -0.032 | 0.147     | 0.135  |
| A008518_01 | -0.404    | -0.142    | -0.304 | 0.406    | -0.056    | 0.402  | 0.429     | 0.285  |
| A008520_01 | 0         | -0.078    | -1.153 | -0.978   | -0.134    | 0.108  | -0.436    | -0.317 |
| A008531_01 | 0.422 NA  |           | 0.125  | -0.166   | 0.138 NA  |        | -0.121 NA |        |
| A008532_01 | -0.082    | -0.005    | -0.078 | 0.066    | 0.174     | 0.249  | -0.28     | -0.275 |
| A008533_01 | -0.262    | -0.576    | -0.065 | 0.208    | -0.094    | -0.129 | -0.019    | -0.038 |
| A008534_01 | 0.139     | -0.126    | -0.153 | -0.282   | 0.108     | 0.076  | -0.264    | -0.329 |
| A008537_01 | -0.334    | -0.3      | -0.569 | 0.397    | -0.143    | -0.151 | -0.258    | -0.227 |
| A008538_01 | -0.09 NA  |           | 0.026  | -0.185   | 0.107 NA  |        | 0.167     | 0.115  |
| A008541_01 | -0.215    | -0.05 NA  |        | 0.03     | 0.193     | 0.203  | -0.614    | -0.339 |
| A008544_01 | 0.117     | 0.061     | -0.621 | 0.248    | 0.028     | 0.273  | -0.07     | 0.065  |
| A008545_01 | -0.031    | 0.015     | 0.241  | 0.002    | 0.235     | 0.23   | 0.533     | 0.379  |
| A008546_01 | 0.011     | 0.015     | -0.572 | -0.494   | 0.056     | 0.06   | 0.101     | 0.145  |
| A008548_01 | 0.025     | 0.081     | 0.423  | 0.505    | -0.294    | -0.575 | 0.042     | -0.068 |
| A008549_01 | 0.042     | -0.087    | 0.09   | 0.564    | -0.213    | -0.68  | -0.131    | -0.143 |
| A008553_01 | 0.603     | 0.578     | -0.192 | 0.518    | 0.084     | 0.247  | 0.107     | 0.13   |
| A008557_01 | -0.267    | 0.086     | -0.061 | 0.043    | 0.069     | 0.156  | -0.143    | -0.088 |
| A008562_01 | 0.54      | 0.346     | 1.769  | 2.157    | 1.432     | 1.513  | 0.16      | 0.219  |
| A008564_01 | 0.225     | 0.122     | -0.189 | 0.041    | -0.03     | -0.08  | 0.042     | 0.11   |
| A008571_01 | 0.561     | 0.274     | -0.221 | 0.152    | 0.128     | 0.276  | 0.049     | 0.039  |
| A008572_01 | -0.428 NA |           | -1.315 | -0.966   | -0.112 NA |        | -0.484    | -0.316 |
| A008573_01 | -0.189    | -0.236    | -0.023 | -0.056   | 0.381     | 0.117  | 0.168     | 0.131  |
| A008575_01 | -0.014    | 0.109     | 0.147  | 0.102    | 0.171     | 0.051  | -0.031    | -0.074 |
| A008576_01 | -0.221    | 0.218     | -0.186 | -0.73    | 0.312     | 0.374  | 0.181     | 0.152  |
| A008578_01 | 1.287     | 1.121     | 0.991  | 0.839    | 0.57      | 0.796  | 0.289     | 0.163  |
| A008580_01 | 0.787     | 0.641     | 0.204  | 0.256    | 0.126     | 0.14   | 0.14      | -0.099 |
| A008582_01 | -0.764    | -0.521    | -0.542 | -0.11    | -0.001    | 0.176  | -0.391    | -0.038 |
| A008583_01 | 0.1       | 0.147     | 0.081  | 0.281    | -0.115    | -0.098 | -0.054 NA |        |
| A008586_01 | 0.297     | 0.037     | -0.339 | -0.065   | 0.742     | 0.241  | -0.203    | -0.161 |
| A008587_01 | -0.288    | -0.351    | -0.363 | -0.276   | -0.41     | -0.744 | -0.343    | -0.184 |
| A008588_01 | 0.213     | 0.169     | 0.201  | 0.353    | -0.028    | -0.58  | 0.069     | -0.059 |
| A008589_01 | 0.596 NA  |           | 0.003  | 0.465    | 0.156 NA  |        | 0.179     | 0.158  |
| A008598_01 | 0.026     | -0.449    | -0.295 | 0.33     | -0.158    | -0.232 | -0.255    | -0.303 |
| A008599_01 | 0.215     | -0.096    | 0.055  | -0.441   | 0.018     | -0.165 | 0.202     | 0.148  |
| A008601_01 | 0.679     | 0.916     | 0.968  | 0.673    | 0.11      | 0.25   | 0.548     | 0.636  |
| A008602_01 | 0.417     | 0.329     | 0.33   | 0.892    | 0.297     | 0.302  | 0.179     | 0.179  |

|            |           |        |        |         |           |        |           |        |
|------------|-----------|--------|--------|---------|-----------|--------|-----------|--------|
| A008603_01 | -0.414    | -0.05  | 0.108  | -0.414  | 0.197     | 0.239  | 0.028 NA  |        |
| A008604_01 | 0.505     | 0.688  | 0.146  | 0.05 NA |           | 0.053  | -0.133    | -0.034 |
| A008605_01 | -0.999    | -0.674 | 0.064  | -0.324  | -0.513    | -0.133 | -0.119    | 0.244  |
| A008608_01 | -0.34     | -0.53  | 0.018  | 0.144   | -0.235    | -0.421 | -0.026    | -0.086 |
| A008615_01 | 0.517     | 0.525  | -0.076 | -0.509  | 0.334     | 0.417  | 0.12      | 0.043  |
| A008616_01 | 0.346     | 0.232  | -0.202 | 0.071   | 0.316     | 0.277  | 0.028     | -0.012 |
| A008621_01 | 0.065     | 0.028  | 0.013  | 0.602   | 0.077     | -0.382 | -0.235 NA |        |
| A008622_01 | -0.248 NA |        | -0.466 | -0.203  | -0.182 NA |        | -0.208    | -0.245 |
| A008627_01 | 0.247     | 0.332  | -0.561 | -0.225  | 0.177     | 0.579  | 0.013     | 0.09   |
| A008631_01 | 0.135 NA  |        | -0.15  | 0.177   | -0.031 NA |        | 0.078     | 0.176  |
| A008632_01 | -0.009    | -0.206 | -0.13  | 0.433   | -0.116    | -0.221 | -0.12 NA  |        |
| A008637_01 | 0.358     | 0.37   | 0.443  | 0.535   | 0.419     | 0.457  | 0.074     | -0.004 |
| A008638_01 | -0.083    | 0.061  | -0.118 | -0.334  | -0.012    | -0.06  | -0.057    | -0.209 |
| A008639_01 | -0.049    | -0.202 | -0.404 | -0.248  | 0.065     | 0.033  | -0.364    | -0.247 |
| A008641_01 | -0.212    | -0.293 | -0.343 | 0.081   | -0.028    | -0.12  | -0.116    | -0.204 |
| A008644_01 | -0.142    | -0.125 | -0.373 | 0.206   | 0.011     | -0.133 | -0.031    | -0.047 |
| A008645_01 | -0.017    | -0.187 | -0.43  | 0.14    | -0.15     | -0.26  | -0.282    | -0.202 |
| A008648_01 | -0.44     | -0.565 | -0.26  | 0.218   | -0.25     | -0.337 | -0.209    | -0.083 |
| A008649_01 | 0.786     | 0.765  | 0.143  | 0.061   | 0.286     | 0.348  | 0.043     | 0.059  |
| A008651_01 | 0.26      | 0.075  | 0.16   | -0.163  | 0.052     | -0.055 | 0.009     | 0.053  |
| A008652_01 | 0.007     | 0.357  | 0.234  | 0.667   | -0.119    | -0.205 | -0.269    | 0.009  |
| A008653_01 | 0.036     | 0.103  | -0.026 | -0.065  | 0.281     | 0.233  | 0.05      | 0.127  |
| A008654_01 | 0.316     | 0.165  | 0.009  | -0.523  | 0.333     | 0.289  | 0.101     | 0.155  |
| A008655_01 | -0.163    | -0.434 | 0.225  | 0.155   | -0.026    | -0.441 | 0.126 NA  |        |
| A008657_01 | -0.158    | -0.716 | -0.048 | 0.269   | -0.004    | -0.258 | -0.083    | -0.13  |
| A008658_01 | -0.019    | 0.042  | -0.886 | -0.976  | -0.117    | -0.055 | -0.737    | -0.601 |
| A008660_01 | -0.975    | -1.198 | -0.283 | 0.198   | -0.205    | -0.371 | 0.348     | 0.204  |
| A008663_01 | 0.398     | 0.516  | 0.079  | 0.4     | -0.076    | -0.175 | -0.231    | -0.127 |
| A008664_01 | -0.093    | -0.156 | 0.19   | 0.116   | 0.339     | 0.183  | -0.194    | 0.01   |
| A008667_01 | 0.306     | 0.068  | -0.011 | 0.217   | 0.334     | 0.294  | -0.022    | -0.036 |
| A008668_01 | -0.239    | -0.118 | -0.3   | 0.248   | -0.221    | -0.427 | -0.154 NA |        |
| A008670_01 | -0.018    | -0.113 | 0.034  | 0.065   | 0.019     | -0.257 | 0.07 NA   |        |
| A008673_01 | -0.384    | -0.412 | -0.41  | -0.539  | 0.044     | -0.055 | -0.298    | -0.201 |
| A008676_01 | 0.144     | 0.15   | 0.162  | 0.357   | 0.083     | 0.206  | -0.065    | -0.006 |
| A008682_01 | -0.092    | -0.09  | -0.055 | 0.045   | 0.054     | -0.162 | -0.278    | -0.246 |
| A008685_01 | 0.482     | 0.449  | 0.027  | -0.199  | 0.319     | 0.45   | 0.06      | -0.026 |
| A008686_01 | 0.438     | 0.453  | 0.183  | 0.113   | 0.148     | 0.186  | 0.047     | 0.097  |
| A008692_01 | 0.739     | 0.865  | -0.374 | -0.267  | 0.456     | 0.701  | -0.703    | -0.495 |
| A008693_01 | -0.283    | -0.388 | 0.319  | 0.29    | -0.132    | 0.03   | 0.08      | 0.289  |
| A008699_01 | -0.101    | 0.086  | -0.261 | 0.056   | -0.017    | 0.161  | -0.081    | 0.091  |
| A008703_01 | 0.516     | 0.297  | -0.145 | 0.192   | 0.215     | 0.275  | -0.089    | -0.227 |
| A008707_01 | -0.411    | -0.422 | -0.891 | -0.875  | -0.045    | 0.033  | 0.071     | 0.018  |
| A008720_01 | -0.134    | -0.176 | -0.224 | -0.392  | 0.071     | -0.06  | -0.168    | -0.044 |
| A008721_01 | 0.192     | 0.232  | 0.183  | -0.379  | -0.017    | 0.001  | 0.121 NA  |        |
| A008722_01 | 0.53      | 0.56   | 0.063  | -0.015  | 0.62      | 0.694  | -0.041    | -0.064 |
| A008726_01 | -0.1      | 0.124  | 0.005  | 0.158   | -0.002    | -0.007 | -0.332    | -0.207 |
| A008727_01 | 0.301     | 0.133  | 0.194  | 0.234   | 0.196     | -0.039 | -0.324    | -0.347 |
| A008728_01 | 0.167     | -0.039 | -0.32  | -0.891  | 0.141     | 0.218  | -0.271 NA |        |
| A008731_01 | 0.341     | 0.116  | 0.05   | 0.648   | -0.007    | -0.166 | -0.076    | -0.069 |
| A008733_01 | 0.332     | 0.219  | -0.295 | -0.097  | 0.262     | 0.261  | -0.143    | -0.153 |
| A008735_01 | 0.028     | 0.1    | -0.152 | -0.843  | 0.049     | 0.278  | 0.131     | 0.059  |
| A008737_01 | 0.256     | 0.11   | 0.273  | -0.03   | 0.093     | -0.037 | -0.03     | -0.157 |
| A008739_01 | 0.018 NA  |        | -0.144 | 0.144   | 0.109 NA  |        | 0.008 NA  |        |
| A008742_01 | -0.059    | -0.389 | 0.615  | 0.502   | 0.164     | 0.191  | -0.188    | -0.049 |
| A008748_01 | -0.441 NA | NA     | NA     |         | -0.048 NA |        | -0.113 NA |        |
| A008752_01 | 0.362     | 0.568  | 0.144  | -0.623  | 0.095 NA  |        | 0.202     | 0.18   |
| A008753_01 | -0.358    | -0.605 | -1.052 | -0.139  | -0.126 NA |        | -0.453    | -0.307 |
| A008755_01 | 0.423     | 0.27   | -0.277 | -0.031  | 0.066     | 0.127  | -0.042    | -0.032 |
| A008758_01 | -0.147    | -0.117 | 0.148  | 0.157   | -0.033    | -0.069 | 0.01      | 0.15   |
| A008759_01 | -0.3      | -0.186 | 0.088  | 0.083   | 0.183     | -0.123 | -0.073    | 0.034  |
| A008762_01 | -0.593    | -0.335 | 0.228  | 0.136   | -0.109    | -0.136 | 0.164     | 0.196  |
| A008763_01 | -0.431    | -0.152 | -0.254 | 0.312   | -0.55     | -0.277 | -0.225    | 0.122  |
| A008764_01 | -0.091 NA |        | -0.275 | -0.05   | 0.007 NA  |        | -0.261    | -0.007 |
| A008775_01 | 0.213     | -0.012 | 0.032  | 0.41    | 0.208 NA  |        | 0.122     | 0.107  |
| A008776_01 | 0.048     | 0.022  | 0.209  | 0.228   | 0.051     | 0.195  | 0.124     | 0.174  |
| A008783_01 | -0.201    | -0.233 | -0.613 | -0.406  | 0.424     | 0.433  | -0.479    | -0.293 |
| A008784_01 | 0.565     | 0.749  | 0.401  | 0.117   | 0.053     | 0.129  | -0.169    | 0.059  |
| A008790_01 | -0.144    | -0.223 | -0.231 | 0.438   | -0.173    | -0.377 | -0.178    | -0.141 |

|            |           |           |        |        |           |        |           |        |
|------------|-----------|-----------|--------|--------|-----------|--------|-----------|--------|
| A008793_01 | -0.273    | -0.235    | 0.034  | -0.151 | -0.066    | -0.354 | -0.271 NA |        |
| A008794_01 | 0.199     | 0.741     | -0.011 | 0.196  | 0.107     | 0.342  | -0.104    | 0.057  |
| A008795_01 | 0.273     | 0.271     | -0.14  | 0.26   | -0.095    | 0.175  | -0.027    | -0.057 |
| A008798_01 | -0.112    | -0.215    | -0.568 | 0.242  | 0.143     | 0.007  | -0.122    | -0.048 |
| A008800_01 | -0.126    | -0.023    | -0.472 | -0.108 | -0.063    | 0.074  | 0.026     | -0.001 |
| A008801_01 | -0.724    | -0.394    | 0.271  | -0.182 | -0.204    | -0.052 | -0.057    | 0.294  |
| A008803_01 | -0.287    | 0.005     | 0.435  | 0.618  | 0.32      | 0.441  | 0.093     | 0.173  |
| A008805_01 | -0.367    | -0.236    | 0.031  | 0.367  | -0.175    | -0.3   | -0.278    | -0.271 |
| A008807_01 | 0.043     | 0.076     | -0.558 | -0.356 | -0.231    | 0.162  | -0.14     | -0.055 |
| A008810_01 | 0.54      | 0.288     | 0.173  | -0.22  | 0.267     | 0.084  | 0.143     | -0.146 |
| A008813_01 | -0.075    | -0.22     | -0.115 | -0.184 | 0.267     | 0.164  | 0.1       | 0.012  |
| A008814_01 | 0.089     | 0.115     | 0.063  | -0.115 | 0.094     | -0.147 | -0.041    | -0.131 |
| A008818_01 | -0.133    | -0.083    | 0.232  | 0.599  | 0.385     | 0.463  | 1.026     | 0.969  |
| A008819_01 | -0.094    | -0.006    | -0.743 | -0.578 | -0.084    | 0.159  | -0.211    | -0.016 |
| A008821_01 | 0.167     | 0.282 NA  |        |        | -0.09     | -0.035 | -0.465 NA |        |
| A008827_01 | -0.395    | -0.061    | 0.189  | 0.258  | -0.036    | 0.072  | -0.209    | -0.144 |
| A008830_01 | -0.593    | -0.532    | 0.11   | 0.335  | -0.094    | -0.26  | -0.163    | -0.078 |
| A008835_01 | -0.047    | -0.115    | -0.577 | 0.382  | -0.038    | -0.076 | -0.214    | -0.122 |
| A008838_01 | 0.264 NA  |           | -0.205 | -0.015 | -0.07 NA  |        | -0.213    | 0.03   |
| A008840_01 | 0.346     | 0.595     | -0.088 | -0.068 | 0.243     | 0.101  | -0.225 NA |        |
| A008842_01 | -0.132    | -0.118    | -0.032 | 0.2    | -0.149    | -0.174 | 0.074     | -0.033 |
| A008846_01 | 0.38      | 0.368     | 0.038  | 0.315  | 0.155 NA  |        | 0.102 NA  |        |
| A008847_01 | 0.063     | 0.581     | 0.337  | 0.078  | 0.093     | 0.263  | -0.095    | 0.359  |
| A008855_01 | 0.4       | 0.378     | -0.171 | 0.141  | 0.149     | 0.021  | -0.07     | -0.116 |
| A008857_01 | -0.249    | -0.417    | 0.415  | 0.409  | -0.056    | 0.014  | 0.475     | 0.932  |
| A008858_01 | 0.301     | 0.116     | 0.254  | 0.192  | 0.168     | 0.32   | -0.036    | 0.051  |
| A008860_01 | 0.107     | 0.114     | 0.009  | 0.339  | 0.089 NA  |        | 0.103     | -0.054 |
| A008861_01 | -0.461    | -1.097    | -0.116 | 0.281  | -0.495    | -0.881 | -0.14     | -0.069 |
| A008862_01 | 0.06      | -0.063    | -0.107 | -0.11  | 0.065     | -0.334 | 0.076     | -0.102 |
| A008863_01 | -0.261    | -0.18     | -0.002 | -0.123 | 0.085     | -0.121 | 0.111     | 0.087  |
| A008865_01 | -0.659    | -0.518    | -0.126 | -0.088 | -0.437    | 0.031  | 0.206     | 0.37   |
| A008867_01 | -0.408 NA |           | -1.38  | -1.513 | -0.398 NA |        | -0.83     | -0.553 |
| A008872_01 | 0.3       | 0.111     | 0.149  | 0.405  | 0.348     | 0.21   | 0.328     | 0.321  |
| A008873_01 | 1.019     | 0.908     | 1.295  | 0.919  | 1.001     | 1.095  | 0.29      | 0.486  |
| A008874_01 | -0.008    | 0.036     | -0.108 | 0.114  | 0.083     | 0.019  | -0.253    | -0.179 |
| A008877_01 | 0.132     | -0.053    | 0.098  | -0.073 | 0.081     | 0.061  | -0.15     | -0.088 |
| A008878_01 | 0.327     | 0.192     | -0.048 | 0.35   | 0.409     | -0.132 | -0.25     | -0.167 |
| A008880_01 | 0.008     | -0.121    | -0.168 | 0.241  | 0.059     | -0.099 | 0.068     | 0.009  |
| A008881_01 | 0.422     | 0.287     | 0.436  | 0.694  | 0.235     | -0.037 | 0.213     | 0.108  |
| A008882_01 | -0.453    | -0.496    | -0.115 | 0.105  | -0.048    | -0.063 | 0.162 NA  |        |
| A008883_01 | -0.107    | -0.017    | 0.09   | 0.291  | -0.391    | -0.809 | -0.056    | -0.155 |
| A008889_01 | -0.073 NA |           | 0.079  | -0.156 | -0.229 NA |        | -0.159    | -0.089 |
| A008890_01 | -0.025    | 0.008     | -0.475 | 0.296  | 0.068     | -0.187 | -0.3 NA   |        |
| A008896_01 | 0.145     | 0.043     | 0.232  | 0.464  | 0.187 NA  |        | 0.223     | 0.143  |
| A008899_01 | -0.205    | -0.342 NA |        |        | 0.127     | -0.25  | 0.032 NA  |        |
| A008904_01 | 0.447     | 0.607     | -0.078 | 0.101  | -0.11     | 0.046  | -0.307    | -0.205 |
| A008906_01 | -0.079    | -0.246    | 0.601  | 0.332  | 0.359     | 0.337  | 0.463     | 0.227  |
| A008909_01 | 0.211     | 0.451     | 0.148  | -0.016 | -0.26     | 0.314  | -0.032    | 0.12   |
| A008913_01 | -0.035    | 0.083     | -0.17  | -0.001 | -0.102    | -0.291 | -0.17     | -0.147 |
| A008919_01 | -0.862    | -0.633 NA |        | 0.204  | -0.812    | -0.888 | -0.466    | -0.092 |
| A008920_01 | 0.036     | -0.166    | 0.085  | 0.35   | -0.677    | -1.064 | -0.462    | -0.393 |
| A008922_01 | 0.41      | 0.332     | 0.529  | 0.544  | 0.073     | 0.156  | 0.121     | 0.132  |
| A008924_01 | -0.09     | -0.171    | -1.507 | -1.367 | 0.093     | 0.006  | -0.821    | -0.823 |
| A008926_01 | 0.164     | -0.015    | -0.138 | -0.13  | -0.044    | -0.169 | 0.041     | -0.036 |
| A008929_01 | 0.121     | 0.276     | 0.119  | -0.004 | -0.093    | -0.001 | -0.032 NA |        |
| A008933_01 | -0.432    | -0.162    | 0.012  | 0.224  | -0.019    | 0.073  | 0.451     | 0.312  |
| A008934_01 | 0.328     | 0.455     | 0.17   | -0.071 | -0.051    | 0.059  | -0.002    | -0.102 |
| A008936_01 | -0.303    | -0.462    | -0.174 | 0.251  | 0.258     | 0.06   | -0.019    | 0.005  |
| A008937_01 | 0.206     | 0.212     | -0.156 | 0.084  | 0.033     | -0.114 | -0.167    | -0.018 |
| A008938_01 | 0.336     | 0.314     | 0.173  | -0.543 | 0.325     | 0.376  | 0.183     | 0.053  |
| A008939_01 | 0.45      | 0.686     | -0.002 | -0.15  | 0.101     | 0.31   | -0.102    | -0.037 |
| A008944_01 | -0.388    | -0.264    | -0.159 | 0.319  | -0.045    | -0.185 | -0.275    | -0.095 |
| A008945_01 | 0.19      | 0.189     | 0.029  | 0.458  | 0.043     | -0.018 | -0.142    | -0.227 |
| A008949_01 | -0.213    | 0.094     | 0.108  | 0.187  | 0.015     | -0.107 | -0.209    | -0.093 |
| A008950_01 | -0.373    | -0.698    | -0.53  | -0.089 | -0.088    | -0.309 | -0.088    | -0.157 |
| A008952_01 | -0.365    | -0.245    | -0.105 | -0.013 | -0.269    | -0.413 | -0.47     | -0.341 |
| A008953_01 | -0.046    | -0.178    | -0.466 | -0.168 | -0.064    | -0.057 | 0.037     | -0.04  |
| A008955_01 | -0.114    | -0.469    | -0.428 | -0.362 | 0.04      | -0.197 | -0.182    | -0.118 |

|            |          |           |           |           |           |        |           |        |
|------------|----------|-----------|-----------|-----------|-----------|--------|-----------|--------|
| A008958_01 | -0.074   | -0.101    | -0.343    | -0.757    | -0.196    | -0.007 | -0.292    | -0.176 |
| A008961_01 | -0.767   | -0.559    | -0.448    | -0.449    | -0.313    | -0.102 | -0.166    | 0.163  |
| A008963_01 | -0.108   | -0.167    | -0.107    | -0.176    | 0.104     | -0.035 | -0.143    | -0.151 |
| A008965_01 | 0.194    | 0.471     | -0.305    | 0.255     | 0.057     | 0.253  | -0.208    | -0.019 |
| A008967_01 | -0.062   | 0.162     | 0.314     | -0.11     | 0.134     | 0.114  | -0.169    | -0.04  |
| A008969_01 | -0.183   | -0.015    | 0.178     | 0.228     | -0.183    | -0.232 | -0.197    | -0.097 |
| A008972_01 | -0.381   | -0.347 NA | NA        |           | -0.185    | -0.244 | -0.066 NA |        |
| A008973_01 | 0.429    | 0.617     | 0.315     | 0.057     | 0.193     | 0.211  | 0.16      | 0.087  |
| A008974_01 | -0.604   | -0.188    | -0.064    | -0.146    | -0.254    | -0.216 | -0.29     | 0.051  |
| A008975_01 | -0.081   | 0.132     | 0.371     | -0.003    | 0.053     | 0.11   | 0.036     | 0.104  |
| A008980_01 | -0.081   | 0.247     | 0.152     | 0.357     | -0.411    | -0.505 | -0.49     | -0.291 |
| A008981_01 | 0.057    | 0.045     | 0.014     | -0.458    | 0.098     | 0.024  | 0.117     | 0.007  |
| A008983_01 | -0.018   | -0.195    | 0.1       | 0.318     | 0.19      | 0.028  | -0.064    | -0.033 |
| A008984_01 | 0.137    | 0.106     | -0.078    | -0.003 NA | NA        |        | 0.143     | 0.035  |
| A008985_01 | 0.267    | 0.295     | -0.362    | 0.09      | 0.117     | 0.207  | -0.205    | -0.063 |
| A008988_01 | -0.285   | -0.343    | -0.479    | 0.014     | -0.263    | -0.361 | -0.212    | -0.179 |
| A008989_01 | -0.493   | -0.35     | 0.012     | -0.132    | -0.08     | -0.181 | -0.135    | 0.21   |
| A008992_01 | -0.209   | 0.051     | -0.367    | -0.056    | -0.2      | 0.152  | -0.181    | -0.095 |
| A008995_01 | -0.297   | -0.334    | -0.157    | -0.132    | -0.106    | -0.137 | -0.062    | -0.166 |
| A008997_01 | -0.207   | -0.56     | -0.336    | -0.077 NA |           | 0.119  | -0.145    | -0.075 |
| A008999_01 | -0.253   | -0.453    | -0.089    | 0.093     | 0.02      | -0.1   | 0.255     | 0.183  |
| A009005_01 | 0.126    | 0.259     | 0.236     | 0.097     | 0.173     | 0.179  | 0.028     | 0.08   |
| A009011_01 | 0.856    | 0.923     | 0.985     | 1.492     | 0.293     | 0.253  | 0.709     | 0.599  |
| A009014_01 | -0.209   | -0.43     | -0.219    | 0.138     | -0.202    | -0.143 | 0.015     | -0.141 |
| A009016_01 | 0.034    | 0.102     | 0.071     | -0.049    | -0.057    | 0.013  | 0.196     | -0.03  |
| A009021_01 | -0.368   | -0.222 NA | NA        |           | -0.047    | 0.048  | -0.189    | -0.014 |
| A009022_01 | 0.228    | 0.023     | 0.016     | 0.055     | 0.182     | 0.27   | 0.035     | -0.008 |
| A009026_01 | 0.258    | 0.323     | -0.057    | -0.722    | 0.131     | 0.288  | 0.2       | -0.02  |
| A009028_01 | 0.559    | 0.687     | 0.003     | 0.146     | 0.075     | 0.161  | -0.024    | 0.03   |
| A009031_01 | 0.099    | 0.125     | -0.062    | 0.411     | -0.025    | -0.386 | -0.208    | -0.196 |
| A009033_01 | -0.338   | -0.443    | 0.054     | 0.351     | 0.056     | -0.079 | -0.063    | -0.108 |
| A009036_01 | 0.41     | 0.279     | 0.141     | 0.362     | -0.237    | -0.063 | 0.149     | 0.138  |
| A009037_01 | 0.364    | 0.356     | 0.801     | 0.695     | 0.314     | 0.384  | 0.818     | 0.485  |
| A009044_01 | -0.555   | -0.276    | -1.469    | -1.158    | -0.306    | -0.246 | -0.543    | -0.35  |
| A009049_01 | -0.179   | -0.114    | -0.29     | -0.394    | 0.366     | 0.273  | -0.169    | -0.089 |
| A009052_01 | 0.14     | -0.066    | -0.308    | -0.109    | -0.012    | -0.111 | -0.005    | 0.032  |
| A009055_01 | -0.292   | -0.371    | -0.962 NA |           | -0.008    | -0.063 | -0.425    | -0.104 |
| A009056_01 | 0.058    | 0.305     | -0.123    | 0.026     | -0.093    | -0.055 | -0.058    | 0.012  |
| A009060_01 | 0.465    | 0.299     | -0.074    | -0.178    | 0.071     | -0.116 | -0.157    | -0.206 |
| A009064_01 | -0.094   | 0.317     | 0.191     | -0.099    | -0.003    | 0.274  | -0.045    | 0.11   |
| A009072_01 | -0.406   | -0.2      | -0.192    | 0.03      | -0.061    | -0.059 | -0.186 NA |        |
| A009073_01 | 0.266 NA |           | 0.224     | 0.192     | 0.094     | 0.311  | 0.13      | 0.033  |
| A009076_01 | -0.459   | -0.414    | -0.152    | -0.3      | -0.198    | -0.108 | -0.162    | -0.085 |
| A009077_01 | 0.022    | 0.211     | -0.022    | -0.764    | 0.312     | 0.647  | 0.248     | 0.366  |
| A009081_01 | -0.43    | -0.617    | -0.079    | -0.286    | -0.11     | -0.23  | 0.225     | 0.184  |
| A009087_01 | -0.358   | -0.171    | 0.349     | -0.118    | -0.062    | 0.055  | 0.674     | 0.656  |
| A009088_01 | 0.588    | 0.714     | 0.8       | 0.316     | 0.388     | 0.767  | 0.514     | 0.326  |
| A009095_01 | 0.555    | 0.408     | -0.15     | 0.442     | -0.003 NA |        | -0.04     | -0.114 |
| A009099_01 | -0.302   | -0.398    | 0.023     | 0.134     | 0.014     | 0.012  | -0.047    | 0.042  |
| A009102_01 | -0.099   | -0.307    | -0.406    | -0.162    | -0.027    | -0.264 | -0.235    | -0.309 |
| A009105_01 | -0.292   | -0.535    | -0.184    | -0.399    | 0.143     | 0.089  | 0.226     | 0.07   |
| A009106_01 | 0.187    | 0.377     | 0.635     | 0.264     | 0.247     | 0.429  | 0.154     | 0.282  |
| A009107_01 | 0.98     | 1.174     | 0.868     | 0.458     | 0.295     | 0.68   | 0.905     | 0.679  |
| A009112_01 | 0.527    | 0.528     | 0.126     | -0.18     | 0.343     | 0.378  | 0.052     | 0.233  |
| A009113_01 | -0.004   | -0.117    | 0.075     | 0.245     | 0.117     | -0.267 | -0.072    | -0.092 |
| A009114_01 | 0.182    | -0.032    | -0.331    | 0.122     | 0.188     | 0.165  | 0.045     | -0.066 |
| A009121_01 | 0.3      | 0.229 NA  |           | 0.293     | 0.211     | 0.448  | -0.22     | -0.154 |
| A009127_01 | 0.499    | 0.425 NA  |           | -0.06     | -0.263 NA |        | -0.067    | -0.089 |
| A009134_01 | -0.136   | -0.097    | 0.087     | 0.086     | 0.129     | -0.229 | -0.032    | -0.244 |
| A009138_01 | -0.108   | 0.019     | 0.531     | 0.397     | -0.111    | -0.335 | 0.459     | 0.551  |
| A009139_01 | 0.638    | 0.709     | 0.367     | 0.297     | 0.592     | 0.952  | 0.597     | 0.693  |
| A009145_01 | -0.279   | -0.385    | -0.265    | 0.152     | 0.084     | -0.104 | 0.037     | -0.024 |
| A009147_01 | 0.261    | 0.372     | -0.115    | 0.33      | -0.197    | -0.418 | -0.412    | -0.475 |
| A009148_01 | 0.621    | 0.581     | 0.479     | 0.588     | 0.246     | 0.396  | 0.574     | 0.606  |
| A009151_01 | 0.195    | 0.385     | -0.349    | -0.152    | 0.21 NA   |        | -0.181    | -0.128 |
| A009152_01 | 0.289    | 0.292     | -0.311    | -0.165    | 0.174     | -0.036 | -0.255    | -0.117 |
| A009153_01 | 0.289    | -0.081    | -0.511    | -1.241    | -0.192    | -0.05  | -0.364    | -0.368 |
| A009156_01 | -0.548   | -0.448 NA |           | -0.522    | -0.093    | -0.316 | -0.317    | -0.22  |

|            |           |           |           |           |           |        |           |        |
|------------|-----------|-----------|-----------|-----------|-----------|--------|-----------|--------|
| A009163_01 | -0.29     | -0.292    | 0.083     | -0.238    | -0.053    | -0.132 | 0.031     | 0.088  |
| A009165_01 | 0.861     | 0.608     | 0.493     | 0.771     | 0.457     | 0.532  | 0.141     | -0.017 |
| A009169_01 | -0.916 NA | NA        |           | -1.564    | -0.52 NA  |        | -1.164    | -0.886 |
| A009176_01 | 0.225     | 0.297     | 0.051     | 0.192     | 0.031     | 0.085  | 0.188     | 0.029  |
| A009182_01 | -0.094    | 0.12      | 0.21      | -0.439    | 0.211     | 0.186  | 0.226     | 0.253  |
| A009187_01 | -0.848    | -1.156    | -0.32     | -0.664    | -0.063    | -0.034 | -0.104    | -0.076 |
| A009189_01 | 0.294     | 0.029     | -0.034 NA |           | 0.109     | -0.407 | -0.064 NA |        |
| A009196_01 | -0.002    | -0.023    | -0.18     | 0.187     | -0.075    | -0.24  | -0.307    | -0.138 |
| A009203_01 | 0.427     | 0.526     | 0.439     | -0.007    | -0.126 NA |        | 0.367     | 0.363  |
| A009205_01 | -0.231    | 0.061     | -1.057    | -0.356    | 0.211     | 0.336  | -0.285 NA |        |
| A009221_01 | -0.074    | -0.046    | -0.455    | -0.333    | 0.311     | 0.332  | -0.128    | -0.141 |
| A009227_01 | -0.607    | -0.537    | -0.39     | -0.005    | -0.016    | -0.08  | -0.105    | -0.002 |
| A009233_01 | -0.714    | -0.793    | -0.941    | -0.653    | -0.157    | -0.191 | -0.69     | -0.55  |
| A009248_01 | -0.108 NA |           | 0.182     | 0.108     | 0.059 NA  |        | 0.17      | 0.071  |
| A009255_01 | -0.785    | -0.643    | -0.828    | -0.614    | -0.534    | -0.552 | -0.725    | -0.462 |
| A009256_01 | 0.13      | 0.088     | -0.376    | 0.11      | -0.065    | -0.237 | -0.265    | -0.383 |
| A009257_01 | 0.211     | 0.286     | 0.356     | 0.213     | 0.181     | -0.074 | -0.099    | -0.137 |
| A009260_01 | -0.045    | -0.054    | -0.383    | -0.063    | 0.001     | -0.009 | -0.633    | -0.559 |
| A009262_01 | 0.207     | 0.07      | 0.2       | 0.343     | 0.041     | 0.039  | -0.14     | -0.203 |
| A009270_01 | -0.176    | 0.102     | 0.164     | -0.163    | 0.114 NA  |        | 0.293     | 0.257  |
| A009272_01 | -0.84     | -0.538    | -0.397    | -0.071    | -0.163    | 0.05   | -0.186    | 0.245  |
| A009273_01 | 0.045     | 0.032     | -0.097    | -0.156    | 0.034     | 0.06   | 0.067     | -0.021 |
| A009281_01 | 0.343     | 0.358     | -0.215    | -0.112 NA | NA        |        | -0.126    | -0.294 |
| A009282_01 | -0.186    | -0.334    | -0.072    | -0.264    | -0.036    | -0.29  | 0.233     | -0.051 |
| A009284_01 | 0.009     | -0.002    | 0.335     | 0.307     | 0.041     | 0.016  | 0.417     | 0.285  |
| A009289_01 | 0.004     | 0.018     | -0.139    | 0.02      | -0.099    | -0.123 | -0.237    | -0.259 |
| A009293_01 | -0.036    | -0.15     | -0.166    | 0.112     | -0.025    | -0.063 | -0.073    | -0.042 |
| A009296_01 | 0.544     | 0.828     | 0.062     | -0.231    | -0.062    | 0.499  | 0.021     | -0.02  |
| A009303_01 | -0.34     | -0.176    | -0.094    | 0.171     | 0.008     | 0.004  | 0.16      | 0.091  |
| A009305_01 | 0.831     | 0.72      | 0.387     | -0.258    | 0.234     | 0.28   | -0.038    | -0.092 |
| A009307_01 | -0.029    | -0.042    | -0.176    | 0.317     | -0.123    | -0.248 | -0.341    | -0.326 |
| A009309_01 | -0.232    | -0.187    | -0.141    | 0.068     | 0.037     | -0.029 | 0.074 NA  |        |
| A009312_01 | 0.107     | 0.12      | 0.085     | -0.07     | -0.061    | 0.093  | 0.142     | 0.038  |
| A009325_01 | -0.585    | -0.432    | 0.128     | 0.018     | -0.757    | -1.018 | -0.22     | 0.048  |
| A009328_01 | 0.67      | 0.579     | 0.531     | 0.695     | 0.534     | 0.723  | 0.301     | 0.36   |
| A009340_01 | -0.333    | -0.649    | -0.278    | 0.26      | -0.295    | -0.761 | -0.241    | -0.212 |
| A009343_01 | -0.108    | 0.023     | 0.205     | -0.169    | 0.065     | 0.076  | 0.052     | 0.18   |
| A009348_01 | 0.276     | 0.418     | 0.003     | 0.267     | 0.184     | 0.165  | 0.065     | -0.064 |
| A009353_01 | -0.662    | -0.341    | -0.167    | 0.264     | -0.284    | 0.014  | -0.073    | 0.212  |
| A009354_01 | 0.154     | 0.116     | 0.085     | 0.09      | 0.048     | 0.145  | -0.15     | 0.001  |
| A009368_01 | -0.454    | -0.323    | -0.215    | -0.302    | 0.015     | 0.007  | -0.031    | -0.116 |
| A009369_01 | 0.39      | 0.493     | 0.229     | 0.374     | -0.118    | -0.244 | -0.183    | -0.38  |
| A009370_01 | 0.2       | 0.094     | -0.029    | -0.372    | 0.132     | -0.018 | 0.072     | 0.023  |
| A009371_01 | 0.422     | 0.338     | 0.076     | -0.419    | 0.097     | 0.085  | 0.423     | 0.367  |
| A009375_01 | -0.288    | -0.196    | -0.079    | -0.148    | 0.19      | -0.05  | -0.225 NA |        |
| A009377_01 | 0.642     | 0.428     | 0.509     | -0.416    | 0.162 NA  |        | 0.193     | 0.068  |
| A009378_01 | -0.191    | -0.169    | 0.036     | -0.288    | 0.236     | 0.376  | -0.254    | -0.278 |
| A009380_01 | -0.433    | -0.307    | 0.079     | 0.044     | -0.057    | -0.025 | -0.157    | -0.201 |
| A009390_01 | -0.369    | -0.225    | -0.14     | 0.046     | -0.177    | -0.101 | 0.006     | 0.026  |
| A009396_01 | -0.145 NA |           | 0.402     | -0.05     | 0.128 NA  |        | 0.203     | 0.143  |
| A009398_01 | 0.221     | 0.404     | -0.129    | 0.106     | 0.138     | 0.332  | 0.294     | 0.259  |
| A009399_01 | -0.011    | -0.075    | 0.256     | -0.312    | 0.178     | 0.221  | -0.216    | -0.134 |
| A009402_01 | -0.123    | 0.282     | 0.356     | 0.195     | 0.241 NA  |        | 0.064 NA  |        |
| A009409_01 | -0.686    | -0.779    | -1.097    | -1.135    | -0.234    | -0.655 | -0.324 NA |        |
| A009410_01 | -0.954    | -0.009    | 0.096     | 0.059     | -0.623    | 0.203  | -0.118    | 0.739  |
| A009411_01 | 0.468     | 0.492     | 0.231     | 0.112     | 0.297     | 0.189  | 0.292     | 0.302  |
| A009413_01 | -0.109    | -0.056    | 0.396     | 0.372     | -0.675    | -1.222 | -0.381    | -0.322 |
| A009414_01 | -0.321    | -0.126    | -0.109    | 0.027     | -0.338    | -0.394 | -0.145    | 0.02   |
| A009415_01 | -0.085    | 0.202 NA  |           | 0.137     | -0.083    | 0.116  | -0.109 NA |        |
| A009426_01 | -0.744    | -0.701    | -0.533    | -0.723    | -0.395    | -0.421 | 0.021     | -0.092 |
| A009431_01 | -0.247 NA |           | -0.125    | 0.245     | -0.497 NA |        | 0.116     | 0.146  |
| A009432_01 | -0.104    | 0.116     | -0.014    | -0.277    | -0.195 NA |        | -0.142    | -0.226 |
| A009434_01 | 0.312     | 0.584     | 0.245     | 0.707     | 0.391     | 0.558  | 0.396 NA  |        |
| A009435_01 | -0.036    | -0.441 NA | NA        |           | -0.149    | -0.415 | -0.483    | -0.168 |
| A009448_01 | -0.538    | -0.288    | 0.342     | 0.058     | 0.163     | 0.13   | 0.066     | 0.219  |
| A009454_01 | 0.114     | 0.037     | 0.33      | 0.817     | 0.101     | -0.019 | 0.193     | 0.106  |
| A009457_01 | 0.022     | 0.215     | -0.129    | 0.329     | -0.017    | 0.089  | -0.052    | 0.007  |
| A009475_01 | 0.094     | 0.138     | 0.393     | 0.197     | 0.192     | 0.14   | -0.079    | 0.022  |

|            |           |           |        |          |           |        |           |        |
|------------|-----------|-----------|--------|----------|-----------|--------|-----------|--------|
| A009480_01 | 0.164     | 0.145     | -0.126 | 0.039    | -0.049    | -0.083 | -0.012    | -0.034 |
| A009485_01 | 0.39      | 0.328     | -0.163 | -0.479   | -0.059 NA |        | 0.08      | 0.026  |
| A009491_01 | -0.262    | 0.225     | 0.258  | 0.506    | -0.263    | -0.413 | -0.05     | 0.251  |
| A009495_01 | 0.105     | 0.213     | 0.049  | 0.147 NA |           | -0.195 | -0.194    | 0.068  |
| A009496_01 | 0.353     | 0.4       | 0.379  | 0.462    | -0.08 NA  |        | 0.088     | 0.07   |
| A009497_01 | 0.007     | -0.029    | -0.593 | -0.337   | -0.012    | -0.026 | 0.138     | 0.25   |
| A009498_01 | 0.209     | 0.165     | -0.065 | 0.049    | -0.301    | -0.297 | 0.011     | 0.066  |
| A009501_01 | -1.85     | -1.861    | -2.195 | -2.214   | -0.854    | -0.682 | -0.815    | -0.564 |
| A009502_01 | 0.283 NA  |           | 0.092  | -0.332   | 0.159 NA  |        | 0.287     | -0.016 |
| A009506_01 | -0.211    | -0.287    | -0.037 | -0.133   | -0.055    | -0.244 | -0.092    | -0.102 |
| A009507_01 | -1.053 NA |           | -0.152 | -0.288   | -0.629 NA |        | -0.082    | -0.081 |
| A009512_01 | 0.144     | 0.434     | 0.186  | 0.735    | 0.635     | 0.628  | 0.326     | 0.544  |
| A009513_01 | -0.042    | -0.137    | -0.331 | 0.163    | 0.036     | -0.06  | -0.3      | -0.376 |
| A009514_01 | 1.08      | 0.954     | 0.294  | -1.337   | -0.107    | 0.545  | 0.302     | 0.341  |
| A009515_01 | -1.945    | -2.467    | -2.739 | -2.654   | -1.306    | -1.996 | -2.581    | -1.988 |
| A009517_01 | -0.21     | -0.349    | 0.005  | 0.461    | 0.13      | 0      | 0.053     | 0.049  |
| A009523_01 | -0.392    | -0.393    | 0.271  | -0.047   | 0.22      | -0.048 | 0.339     | 0.256  |
| A009525_01 | 0.255     | 0.217     | 0.141  | -0.376   | 0.186     | 0.677  | 0.178     | -0.071 |
| A009530_01 | 1.038     | 0.745     | 0.581  | 0.8      | 0.105     | 0.093  | 0.103     | -0.001 |
| A009531_01 | -0.261    | -0.535    | -0.046 | 0.09     | -0.174    | -0.347 | -0.187    | -0.28  |
| A009534_01 | 0.162     | 0.284     | 0.261  | 0.29     | 0.114     | 0.368  | 0.229     | 0.303  |
| A009537_01 | -0.311    | -0.436    | 0.159  | 0.019    | 0.072     | -0.091 | 0.077     | 0.065  |
| A009540_01 | -0.084    | -0.015    | 0.166  | 0.841    | 0.289     | 0.198  | 0.272 NA  |        |
| A009542_01 | 0.633     | 0.47      | -0.08  | 0.143 NA | NA        |        | -0.03     | 0.053  |
| A009543_01 | 0.072     | -0.015    | -0.454 | 0.243    | 0.046     | -0.209 | -0.303    | -0.111 |
| A009544_01 | -1.028    | -1.464 NA |        | 0.142    | -0.548    | -0.845 | -0.014    | 0.156  |
| A009545_01 | -0.048    | -0.049    | -0.09  | -0.107   | 0.052     | -0.131 | 0.096 NA  |        |
| A009548_01 | 0.552     | 0.179     | 0.131  | -0.384   | 0.134     | 0.269  | 0.259     | 0.13   |
| A009549_01 | 0.16      | -0.015    | 0.422  | 0.204    | 0.061     | -0.182 | 0.336     | 0.22   |
| A009551_01 | 0.107     | 0.286     | 0.197  | 0.064    | -0.051    | 0.083  | 0.114     | 0.219  |
| A009557_01 | 0.065     | -0.266    | 0.391  | 0.114    | -0.575    | -0.783 | 0.326     | 0.147  |
| A009560_01 | -0.092    | -0.236    | 0.013  | -0.018   | 0.059     | -0.065 | 0.045     | 0.073  |
| A009561_01 | 0.169     | 0.147     | -0.293 | 0.085    | 0.088 NA  |        | 0.025     | 0.061  |
| A009563_01 | -0.06     | -0.251    | -0.215 | 0.477    | -0.106    | -0.309 | -0.211    | -0.153 |
| A009566_01 | 0.475     | 0.324     | -0.298 | 0.192    | 0.012     | 0.21   | -0.064    | -0.093 |
| A009567_01 | -0.424    | -0.171    | 0.15   | 0.111    | -0.004    | -0.076 | -0.124    | -0.024 |
| A009568_01 | 0.398     | 0.294     | 0.095  | 0.62     | -0.059    | -0.134 | -0.137    | -0.149 |
| A009573_01 | -0.308    | -0.3      | 0.156  | -0.136   | -0.114    | 0.116  | 0.25      | 0.166  |
| A009579_01 | 0.114     | -0.006    | -0.069 | -0.34    | -0.001    | -0.188 | -0.107    | -0.041 |
| A009580_01 | -0.825    | -0.45     | -0.357 | 0.057    | -0.485    | -0.087 | -0.346    | -0.11  |
| A009581_01 | 0.078     | 0.174     | 0.183  | -0.228   | -0.029    | 0.184  | 0.173     | 0.26   |
| A009583_01 | -0.927    | -0.903    | -0.64  | -0.61    | -0.188    | -0.346 | -0.228    | -0.333 |
| A009590_01 | 0.005     | 0.196     | 0.469  | -0.037   | 0.134     | 0.351  | 0.546     | 0.615  |
| A009594_01 | 0.096     | 0.137     | -0.623 | -0.387   | 0.064     | 0.174  | -0.268 NA |        |
| A009595_01 | -0.011    | -0.06     | 0.164  | -0.003   | 0.131     | 0.018  | 0.024 NA  |        |
| A009603_01 | 0         | -0.202    | 0.15   | 0.319    | -0.537    | -0.653 | -1.172    | -0.878 |
| A009609_01 | 0.061     | -0.1      | 0.088  | 0.447    | 0.249     | 0.295  | 0.004     | 0.008  |
| A009611_01 | -0.211    | -0.255    | -0.217 | -0.472   | 0.002     | -0.021 | -0.127    | -0.034 |
| A009614_01 | -0.045    | -0.234    | -0.021 | 0.055    | -0.053    | -0.244 | -0.109    | -0.036 |
| A009618_01 | -0.096    | 0.004     | -0.478 | 0.314    | -0.11     | -0.257 | -0.73 NA  |        |
| A009619_01 | 0.297     | 0.096     | -0.081 | 0.056    | 0.247     | 0.292  | -0.042    | -0.064 |
| A009625_01 | -0.071    | -0.106    | 0.173  | 0.476    | 0.071 NA  |        | 0.232     | 0.231  |
| A009627_01 | -0.508    | -0.873    | -0.418 | -0.885   | -0.478    | -0.696 | 0.045     | -0.008 |
| A009632_01 | 0.533     | 0.558     | 0.125  | 0.467    | -0.117 NA |        | -0.041    | 0.055  |
| A009633_01 | -0.599    | -0.667    | 0.032  | -0.262   | -0.319    | -0.331 | 0.129     | 0.303  |
| A009639_01 | -0.361    | -0.217    | -0.814 | -0.606   | 0.069     | 0.113  | -0.222    | -0.143 |
| A009641_01 | 0.211     | 0.183     | 0.235  | -0.188   | 0.011     | -0.12  | -0.101    | -0.092 |
| A009660_01 | -0.373    | -0.317    | 0.299  | 0.077    | -0.307    | -0.5   | -0.106 NA |        |
| A009661_01 | 0.48      | 0.245     | 0.289  | 0.058    | 0.272     | 0.046  | 0.082     | 0.034  |
| A009663_01 | 0.04      | 0.331     | -0.034 | -0.328   | 0.001     | 0.313  | -0.008    | 0.08   |
| A009665_01 | -0.259    | -0.302    | -0.496 | -0.217   | -0.255    | -0.131 | -0.195    | 0.066  |
| A009670_01 | 0.221     | 0.09      | 0.307  | 0.174    | -0.1      | -0.105 | 0.125     | -0.063 |
| A009676_01 | 0.183     | 0.185     | -0.276 | 0.314    | -0.088    | -0.29  | -0.311    | -0.053 |
| A009682_01 | -0.209    | -0.345    | -0.312 | 0.171    | -0.13     | -0.384 | -0.197    | -0.194 |
| A009684_01 | 0.007     | -0.033    | -0.431 | -0.048   | -0.534    | -0.571 | -0.121    | 0.169  |
| A009688_01 | -0.083    | 0.336     | 0.019  | 0.314    | -0.16 NA  |        | 0.058     | 0.139  |
| A009691_01 | -0.075    | 0.043     | -0.33  | -0.252   | 0.14      | 0.313  | -0.01     | 0.003  |
| A009693_01 | 0.258     | 0.05      | 0.213  | 0.083    | 0.101     | 0.147  | 0.113     | 0.171  |



|            |           |           |           |           |           |        |           |        |
|------------|-----------|-----------|-----------|-----------|-----------|--------|-----------|--------|
| A009699_01 | -0.003 NA | NA        |           | 0.007     | 0.114 NA  |        | 0.069 NA  |        |
| A009711_01 | -0.124    | -0.2      | -0.098    | 0.254     | 0.187     | 0.055  | -0.024    | -0.046 |
| A009713_01 | 0.716     | 0.423     | 0.388     | -0.385    | 0.326     | 0.203  | 0.23      | -0.002 |
| A009728_01 | -0.431    | -0.387 NA |           | -0.191    | -0.07 NA  |        | -0.513 NA |        |
| A009731_01 | 0.498     | 0.273     | 0.227     | -0.018    | 0.318     | 0.167  | 0.087 NA  |        |
| A009733_01 | 0.387     | 0.593     | 0.365     | -0.396    | 0.558     | 0.767  | 0.419     | 0.349  |
| A009737_01 | 0.12      | 0.134     | 0.036     | 0.099     | 0.184     | 0.129  | -0.076 NA |        |
| A009738_01 | -0.291 NA | NA        |           | -0.364 NA | NA        |        | -0.075    | 0.069  |
| A009740_01 | 0.094     | 0.002     | -0.23     | -0.14     | 0.093     | -0.143 | -0.473    | -0.46  |
| A009744_01 | 0.35      | 0.127     | 0.321     | 0.344 NA  |           | 0.182  | 0.35      | 0.245  |
| A009746_01 | -0.008    | -0.27     | -0.111    | 0.222     | 0.005     | -0.277 | 0.027     | -0.052 |
| A009751_01 | 0.204     | 0.087     | 0.318     | 0.518     | 0.377     | 0.281  | 0.483     | 0.253  |
| A009752_01 | -0.367    | -0.815    | -0.065    | -0.038    | 0.318 NA  |        | 0.606     | 0.452  |
| A009753_01 | 0.085     | 0.023     | -0.692    | 0.203 NA  |           | -0.586 | -0.751    | -0.499 |
| A009755_01 | 0.382     | 0.496     | 0.173     | -0.311    | 0.333 NA  |        | 0.379 NA  |        |
| A009761_01 | 0.252     | 0.196     | 0.257     | 0.162     | 0.086     | 0.062  | 0.099     | 0.049  |
| A009762_01 | 0.086     | -0.156    | -0.243    | 0.243     | -0.06     | 0.087  | -0.104    | 0.047  |
| A009764_01 | -0.108    | 0.038     | 0.072     | 0.585     | -0.202    | -0.167 | -0.221    | -0.092 |
| A009765_01 | -0.156    | -0.333    | -0.414    | -0.618    | 0.021     | -0.153 | 0.097     | -0.077 |
| A009766_01 | 0.248     | 0.185     | 0.158     | 0.484     | 0.003     | 0.077  | -0.19 NA  |        |
| A009769_01 | -0.155    | -0.371    | -0.414    | -0.217    | -0.086    | -0.148 | -0.039    | 0.003  |
| A009770_01 | -0.157 NA |           | -0.32 NA  |           | -0.049 NA |        | -0.002 NA |        |
| A009776_01 | -1.502    | -1.277    | -0.775    | -0.871    | -0.508    | -0.837 | -0.705    | -0.489 |
| A009777_01 | 0.055     | -0.041    | -0.043    | -0.286    | 0.247     | 0.224  | 0.218     | 0.221  |
| A009780_01 | 0.337     | 0.463     | -0.427    | -0.097    | 0.065     | 0.392  | -0.115    | 0.034  |
| A009784_01 | 0.641     | 0.65      | 0.201     | -0.206    | 0.248     | 0.432  | 0.117 NA  |        |
| A009787_01 | -0.189 NA |           | -0.468    | -0.261    | 0.213     | 0.281  | -0.235    | -0.113 |
| A009790_01 | -0.128    | -0.476    | -0.043    | 0.216     | 0.005     | -0.082 | -0.164    | -0.183 |
| A009792_01 | -0.204    | -0.163    | 0.18      | -0.016    | -0.26     | -0.284 | -0.298    | -0.093 |
| A009796_01 | 0.049     | 0.18      | 0.227     | 0.048     | -0.105    | -0.126 | -0.203    | -0.197 |
| A009797_01 | 0.307     | 0.407     | -0.018    | -0.824    | -0.094    | 0.221  | 0.114     | 0.122  |
| A009803_01 | 0.001     | -0.02     | -0.589    | -0.742    | 0.137     | 0.101  | -0.076    | -0.042 |
| A009805_01 | 0.267     | 0.041     | -0.186    | -0.091    | 0.132     | 0.085  | -0.02     | -0.214 |
| A009809_01 | 0.133     | 0.008     | 0.185     | 0.193     | 0.149     | 0.024  | -0.033    | -0.047 |
| A009811_01 | -0.114    | 0.095     | -0.138    | -0.066    | -0.358    | -0.27  | -0.868    | -0.536 |
| A009821_01 | 0.126     | -0.096    | 0.224     | 0.164     | 0.201     | 0.087  | 0.227     | 0.047  |
| A009822_01 | 0.658     | 0.521     | 0.286     | 0.757     | 0.193     | -0.014 | -0.741    | -0.641 |
| A009826_01 | 0.265     | 0.292 NA  |           | -0.188    | 0.221     | 0.335  | -0.003 NA |        |
| A009834_01 | 0.059     | 0.08      | -0.297    | 0.148     | -0.082    | -0.054 | -0.185    | -0.242 |
| A009836_01 | -0.865    | -0.944    | -1.102    | -1.034    | 0.08      | 0.051  | -0.889    | -0.612 |
| A009843_01 | -0.526    | -0.655    | -0.556    | -0.213    | -0.059    | -0.037 | -0.038    | 0.114  |
| A009845_01 | -0.733    | -0.798 NA |           | -0.947    | -0.194    | -0.26  | -0.46     | -0.226 |
| A009846_01 | -0.517    | -0.532    | -0.172    | -0.242    | 0.146     | -0.015 | 0.012     | -0.057 |
| A009848_01 | 0.25      | 0.189     | -0.037    | -0.409    | 0.416     | 0.386  | 0.157     | 0.113  |
| A009849_01 | 0.08      | 0.072     | 0.153     | -0.127    | -0.027    | 0.127  | -0.03     | 0.031  |
| A009855_01 | -0.102    | -0.244 NA | NA        |           | -0.051    | -0.331 | 0.039 NA  |        |
| A009864_01 | 0.2       | 0.125     | 0.138     | 0.086     | 0.153 NA  |        | 0.089     | 0.077  |
| A009867_01 | -0.095    | -0.009    | -0.096    | 0.218     | 0.122     | 0.433  | 0.168     | 0.209  |
| A009868_01 | 0.008     | -0.23     | 0.014     | 0.095     | 0.125     | -0.147 | -0.085    | -0.172 |
| A009870_01 | 0.432     | 0.579     | 0.27      | 0.069     | 0.057     | 0.271  | -0.097    | -0.107 |
| A009879_01 | -0.152    | -0.106    | -0.179    | 0.247     | -0.187    | -0.005 | -0.344    | 0.049  |
| A009885_01 | -0.048    | -0.435    | 0.019     | -0.18     | 0.211     | -0.027 | 0.228     | -0.043 |
| A009890_01 | 0.915     | 0.924     | 0.933     | 0.758     | 0.334     | 0.53   | 0.952     | 0.765  |
| A009894_01 | 0.389     | 0.403     | -0.015    | -0.404    | -0.02     | 0.094  | -0.21     | -0.222 |
| A009895_01 | -0.14     | -0.068    | 0.383     | -0.009    | 0.162     | 0.105  | 0.106     | 0.039  |
| A009898_01 | -0.399    | -0.372    | -0.092    | 0.172     | 0.065     | -0.069 | -0.025    | -0.088 |
| A009900_01 | -2.064    | -2.29     | -1.68     | -1.746    | -0.592    | -0.497 | -1.233    | -0.926 |
| A009902_01 | 0.113     | -0.057    | -0.184    | 0.191     | 0.071     | -0.121 | -0.076 NA |        |
| A009905_01 | -0.028    | 0.057     | 0.331     | -0.262    | -0.316    | -0.555 | -0.33     | -0.241 |
| A009906_01 | -0.004    | 0.139     | 0.228     | 1.054     | 0.71      | 0.692  | -0.006    | 0.126  |
| A009911_01 | -0.47     | -0.578    | -0.565    | -0.345    | -0.189    | -0.66  | -0.129    | -0.131 |
| A009916_01 | -0.206    | -0.02     | 0.017     | 0.422     | 0.083     | 0.234  | 0.139     | 0.213  |
| A009920_01 | 0.021     | -0.044    | 0.207     | -0.004    | 0.242     | 0.027  | 0.106     | 0.05   |
| A009926_01 | -0.311    | 0.123     | -1.111 NA |           | -0.113    | 0.144  | -0.397 NA |        |
| A009927_01 | -0.094    | -0.223    | 0.067     | 0.112     | 0.13      | -0.166 | 0.215     | -0.074 |
| A009934_01 | -0.452    | -0.254    | -0.31     | 0.095     | -0.39     | -0.802 | -0.62     | -0.42  |
| A009939_01 | -0.217    | -0.328    | -0.327    | 0.155     | -0.075    | -0.067 | -0.242 NA |        |
| A009941_01 | -0.236    | 0.039     | -0.058    | -0.193    | 0.056     | 0.218  | -0.132    | -0.052 |

|            |        |        |        |        |        |        |        |        |
|------------|--------|--------|--------|--------|--------|--------|--------|--------|
| A009948_01 | 0.292  | 0.119  | -0.279 | 0.337  | 0.047  | -0.058 | -0.325 | -0.101 |
| A009949_01 | -0.916 | -0.827 | -0.449 | -0.125 | -0.493 | -0.584 | -0.286 | -0.13  |
| A009956_01 | 0.103  | 0.166  | -0.228 | -0.146 | 0.395  | 0.314  | 0.169  | 0.046  |
| A009958_01 | -0.332 | -0.039 | 0.071  | -0.22  | -0.138 | -0.016 | -0.121 | 0.244  |
| A009960_01 | 0.057  | 0.134  | 0.262  | 0.063  | 0.209  | 0.044  | 0.015  | -0.009 |
| A009964_01 | 0.064  | 0.074  | 0.048  | 0.076  | -0.126 | -0.021 | -0.035 | -0.059 |
| A009965_01 | 0.226  | 0.278  | 0.229  | 0.265  | 0.006  | 0.065  | 0.172  | 0.118  |
| A009968_01 | -0.136 | -0.38  | -0.486 | -0.279 | 0.114  | -0.211 | -0.457 | -0.385 |
| A009979_01 | -0.049 | -0.177 | -0.09  | -0.481 | 0.058  | -0.228 | -0.037 | -0.174 |
| A009988_01 | -0.479 | -0.413 | -0.753 | -0.938 | -0.121 | -0.113 | -0.361 | -0.454 |
| A009989_01 | -0.573 | -0.615 | -0.111 | -0.245 | -0.277 | -0.313 | -0.182 | -0.159 |
| A009990_01 | 0.395  | 0.472  | -0.116 | 0.42   | -0.002 | -0.109 | -0.364 | -0.261 |
| A009991_01 | -0.169 | -0.361 | -0.047 | 0.454  | -0.003 | -0.343 | -0.142 | NA     |
| A009994_01 | -0.101 | -0.082 | -0.359 | 0.133  | 0.046  | 0.061  | 0.066  | 0.077  |
| A009997_01 | 0.165  | 0.221  | 0.194  | -0.435 | -0.054 | 0.206  | 0.159  | 0.164  |
| A010000_01 | -0.025 | 0.162  | 0.33   | 0.287  | 0.093  | -0.066 | -0.094 | -0.001 |
| A010007_01 | 0.163  | 0.146  | -0.272 | 0.131  | 0.139  | NA     | -0.223 | -0.145 |
| A010011_01 | -0.241 | -0.121 | 0.149  | 0.611  | -0.15  | -0.138 | 0.172  | 0.174  |
| A010018_01 | 0.142  | 0.026  | 0.141  | 0.17   | 0.112  | 0.162  | 0.116  | 0.097  |
| A010021_01 | -0.07  | -0.015 | -0.542 | 0.262  | -0.109 | -0.011 | -0.126 | -0.002 |
| A010023_01 | -0.367 | -0.006 | 0.323  | 0.333  | 0.056  | -0.153 | NA     | 0.104  |
| A010025_01 | 0.303  | 0.159  | NA     | -0.061 | 0.226  | 0.195  | 0.1    | 0.083  |
| A010027_01 | -0.064 | 0.152  | 0.221  | NA     | -0.064 | -0.17  | -0.02  | NA     |
| A010028_01 | -0.158 | -0.001 | -0.087 | -0.2   | -0.142 | 0.04   | -0.058 | 0.04   |
| A010033_01 | 0.241  | 0.294  | -0.395 | 0.013  | 0.103  | 0.118  | -0.174 | -0.071 |
| A010040_01 | 0.01   | 0.257  | 0.088  | 0.03   | -0.017 | 0.024  | 0.022  | -0.068 |
| A010042_01 | 0.399  | 0.206  | -0.115 | 0.234  | 0.086  | -0.337 | -0.077 | -0.16  |
| A010044_01 | 0.214  | 0.191  | -0.003 | 0.303  | 0.192  | -0.017 | 0.147  | 0.039  |
| A010047_01 | -0.072 | -0.175 | NA     | -0.148 | 0.104  | -0.048 | -0.049 | -0.145 |
| A010048_01 | 0.827  | 0.895  | 0.953  | 0.995  | 0.201  | 0.089  | -0.48  | NA     |
| A010049_01 | 0.257  | 0.031  | 0.293  | 0.394  | 0.361  | 0.277  | -0.135 | -0.097 |
| A010051_01 | -0.576 | -0.383 | 0.261  | 0.152  | -0.381 | -0.563 | -0.239 | NA     |
| A010059_01 | -0.144 | 0.035  | 0.026  | 0.176  | -0.301 | -0.331 | -0.039 | -0.012 |
| A010061_01 | -0.04  | -0.048 | -0.262 | -0.481 | 0.115  | -0.139 | -0.142 | -0.078 |
| A010065_01 | 0.989  | 0.955  | 1.267  | 0.872  | 0.357  | 0.638  | -0.069 | 0.011  |
| A010066_01 | -0.639 | -0.691 | -0.481 | -0.489 | NA     | -0.138 | 0.343  | 0.394  |
| A010068_01 | -0.099 | -0.086 | -0.381 | -0.121 | -0.025 | -0.041 | -0.398 | -0.199 |
| A010172_01 | -0.514 | -0.574 | -0.198 | 0.162  | -0.195 | -0.332 | -0.077 | -0.099 |
| A010173_01 | -0.146 | -0.305 | -0.357 | -0.281 | -0.039 | 0.065  | -0.088 | -0.034 |
| A010174_01 | 0.087  | -0.077 | 0.116  | 0.333  | -0.04  | -0.078 | 0.294  | 0.163  |
| A010190_01 | 0.08   | -0.087 | -0.142 | -0.085 | NA     | NA     | 0.114  | 0.143  |
| A010219_01 | 0.44   | 0.738  | 0.632  | 0.082  | 0.183  | 0.394  | 0.485  | 0.334  |
| A010227_01 | 0.121  | 0.26   | -0.137 | 0.157  | 0.035  | 0.142  | -0.193 | -0.03  |
| A010255_01 | 0.146  | -0.16  | 0.33   | 0.073  | 0.138  | -0.12  | 0.354  | -0.021 |
| A010261_01 | 0.046  | 0.287  | NA     | 0.25   | 0.443  | 0.596  | 0.163  | 0.272  |
| A010262_01 | 0.015  | 0.185  | -0.295 | -0.073 | -0.146 | 0.216  | -0.126 | -0.046 |
| A010265_01 | -0.134 | -0.152 | 0.244  | -0.457 | 0.045  | 0.123  | 0.208  | 0.174  |
| A010270_01 | -0.292 | -0.133 | -0.406 | 0.048  | 0.124  | 0.103  | -0.054 | NA     |
| A010272_01 | -0.23  | -0.413 | 0.254  | 0.275  | -0.199 | -0.409 | -0.194 | -0.207 |
| A010274_01 | 0.199  | 0.401  | -0.172 | -0.494 | 0.161  | 0.222  | 0.135  | 0.017  |
| A010275_01 | -0.164 | -0.089 | -0.167 | -0.257 | 0.091  | -0.023 | -0.047 | -0.072 |
| A010276_01 | -0.06  | -0.184 | 0.402  | -0.6   | -0.07  | -0.345 | 0.337  | 0.245  |
| A010282_01 | 0.195  | 0.225  | 0.091  | 0.045  | 0.148  | 0.258  | -0.003 | -0.027 |
| A010294_01 | -0.096 | -0.105 | -0.108 | 0.003  | 0.172  | 0.206  | 0.003  | 0.11   |
| A010296_01 | -0.131 | -0.039 | -0.133 | 0.707  | -0.056 | -0.407 | -0.028 | 0.084  |
| A010300_01 | -0.154 | -0.084 | NA     | 0.061  | -0.2   | -0.349 | 0.123  | NA     |
| A010306_01 | -0.99  | -1.044 | NA     | NA     | -0.39  | -0.425 | -0.392 | NA     |
| A010307_01 | 0.32   | 0.391  | 0.059  | -0.339 | 0.368  | 0.446  | 0.138  | 0.158  |
| A010308_01 | 0.557  | 0.671  | 0.244  | -0.284 | 0.226  | 0.564  | 0.191  | 0.187  |
| A010310_01 | 0.178  | -0.11  | -0.241 | 0.02   | 0.102  | 0.064  | -0.067 | -0.046 |
| A010313_01 | -0.05  | 0.005  | -0.077 | 0.288  | 0.041  | NA     | -0.06  | NA     |
| A010315_01 | 0.122  | -0.127 | -0.155 | -0.019 | 0.239  | 0.229  | -0.286 | -0.335 |
| A010316_01 | 0.57   | 0.5    | 0.019  | -0.329 | 0.063  | 0.372  | -0.21  | -0.117 |
| A010318_01 | 0.531  | 0.352  | -0.171 | 0.037  | 0.115  | 0.465  | -0.323 | -0.249 |
| A010320_01 | 0.219  | 0.371  | -0.248 | 0.512  | -0.123 | -0.336 | -0.234 | -0.258 |
| A010323_01 | -0.295 | -0.104 | -0.41  | 0.022  | -0.133 | 0.064  | -0.068 | -0.063 |
| A010327_01 | -0.127 | -0.071 | -0.145 | 0.147  | -0.194 | -0.294 | -0.288 | -0.098 |
| A010328_01 | -0.24  | -0.351 | -0.17  | -0.252 | 0.095  | -0.229 | -0.02  | -0.122 |

|            |           |           |        |           |           |        |           |        |
|------------|-----------|-----------|--------|-----------|-----------|--------|-----------|--------|
| A010329_01 | 0.558     | 0.431     | 0.165  | 0.057     | 0.195     | 0.074  | 0.027     | -0.145 |
| A010333_01 | 0.265     | 0.537     | 0.195  | -0.712    | -0.392    | -0.038 | -0.15     | 0.111  |
| A010343_01 | -0.696    | -0.79 NA  |        | -0.335    | -0.178 NA |        | -0.544 NA |        |
| A010344_01 | -0.181    | -0.207    | -0.183 | 0.22      | -0.101    | -0.243 | -0.043    | -0.155 |
| A010345_01 | 0.138     | 0.175     | 0.337  | -0.221    | 0.023     | -0.104 | 0.096     | -0.082 |
| A010348_01 | -0.26     | -0.511    | -0.459 | -0.383    | -0.213    | -0.269 | -0.214    | 0.212  |
| A010349_01 | 0.278     | 0.123     | 0.337  | 0.197     | 0.058     | 0.133  | -0.058    | -0.145 |
| A010354_01 | -0.646 NA | NA        | NA     |           | -0.275    | -0.271 | -0.59 NA  |        |
| A010359_01 | 0.072     | 0.052     | -0.181 | -0.427    | 0.207     | 0.15   | -0.044    | 0.087  |
| A010362_01 | 0.288     | 0.364     | 0.098  | -0.105    | 0.353     | 0.228  | -0.153    | -0.169 |
| A010363_01 | 0.282     | 0.005     | -0.06  | 0.206     | 0.206     | -0.08  | -0.075    | -0.113 |
| A010365_01 | 0.201     | -0.076    | -0.366 | 0.135     | 0.043     | -0.116 | -0.126    | -0.138 |
| A010369_01 | 0.251     | 0.033     | 0.122  | 0.304     | -0.17     | -0.433 | -0.024    | -0.209 |
| A010371_01 | 0.423     | 0.333     | -0.264 | -0.221    | 0.424 NA  |        | 0.011 NA  |        |
| A010374_01 | 0.609     | 0.322     | -0.07  | -0.007 NA |           | 0.231  | 0.04      | -0.03  |
| A010377_01 | 0.075     | -0.018    | 0.073  | -0.388    | -0.062    | -0.209 | 0.035     | -0.147 |
| A010378_01 | -1.388    | -1.533    | -0.858 | -0.076    | -1.751 NA |        | -1.757    | -1.594 |
| A010379_01 | 0.028     | 0.213     | 0.35   | 0.134     | -0.05     | -0.033 | -0.007    | 0.172  |
| A010383_01 | 0.011     | -0.008    | 0.304  | 0.035     | 0.502     | 0.692  | -0.072    | -0.003 |
| A010390_01 | 0.24      | 0.195     | 0.174  | 0.596     | 0.222     | 0.125  | 0.438     | 0.31   |
| A010393_01 | -0.06     | -0.123    | 0.406  | 0.598     | -0.998    | -1.514 | -0.16     | -0.19  |
| A010395_01 | 0.169 NA  |           | 0.126  | 0.401     | 0.222 NA  |        | 0.071 NA  |        |
| A010400_01 | -0.061    | -0.252    | -0.448 | -0.148    | 0.157     | 0.083  | -0.267    | -0.367 |
| A010404_01 | 0.065     | 0.169     | 0.038  | 0.161     | -0.126    | -0.248 | -0.137    | -0.089 |
| A010411_01 | -0.265    | -0.421    | 0.126  | 0.193     | 0.105     | -0.299 | 0.137     | 0.207  |
| A010413_01 | 0.192     | 0.354     | 0.4 NA |           | 0.16      | 0.313  | 0.202 NA  |        |
| A010414_01 | -0.617    | -0.665    | -0.747 | -0.516    | -0.298    | -0.249 | -0.393    | -0.159 |
| A010417_01 | -0.214    | -0.156    | -0.163 | -0.617    | 0.247     | 0.375  | 0.203     | 0.169  |
| A010420_01 | -0.402    | -0.646    | -0.214 | 0.318     | -0.223    | -0.377 | -0.254    | -0.221 |
| A010425_01 | 0.179     | 0.069     | -0.231 | 0.127     | 0.032     | 0.216  | -0.132    | -0.202 |
| A010433_01 | 0.07      | 0.163     | 0.208  | -0.328    | 0.267     | 0.307  | 0.076     | 0.031  |
| A010434_01 | 0.16      | 0.093     | 0.404  | 0.252     | 0.15      | 0.185  | 0.197     | 0.195  |
| A010441_01 | 0.004     | 0.034     | 0.218  | 0.011     | 0.165     | -0.091 | 0.087     | 0.099  |
| A010443_01 | 0.294     | 0.195     | -0.026 | -0.89     | 0.088     | 0.274  | 0.363     | 0.197  |
| A010449_01 | 0.116     | 0.056     | 0.181  | 0.124     | -0.004    | -0.144 | -0.005    | -0.146 |
| A010451_01 | 0.362     | 0.254     | -0.05  | 0.023     | 0.305     | 0.389  | 0.062     | 0.018  |
| A010452_01 | 0.305     | 0.108     | -0.034 | 0.04      | 0.126     | 0.209  | 0.086     | 0.064  |
| A010456_01 | 0.093     | 0.145     | 0.043  | -0.078    | 0.006     | 0.115  | 0.017     | 0.029  |
| A010457_01 | -0.087    | -0.086    | -0.172 | -0.067    | 0.056 NA  |        | -0.106    | -0.142 |
| A010458_01 | -0.096    | 0.021     | 0.337  | 0.455     | 0.099     | -0.009 | -0.071    | -0.094 |
| A010459_01 | -0.014    | 0.191     | 0.042  | 0.27      | 0.168     | 0.052  | -0.076    | -0.093 |
| A010460_01 | -0.022    | 0.177     | 0.248  | 0.145     | -0.321    | -0.382 | -0.144    | -0.103 |
| A010461_01 | 0.262     | 0.157     | 0.774  | 0.842     | 0.455     | 0.245  | 0.942 NA  |        |
| A010463_01 | -0.359    | -0.458    | 0.276  | 0.493     | -0.041    | -0.295 | -0.207    | -0.085 |
| A010464_01 | 0.474     | 0.177     | -0.166 | -0.144    | 0.319     | 0.5    | -0.098    | -0.123 |
| A010466_01 | 0.376     | 0.174     | -0.059 | 0.018     | 0.332     | 0.371  | 0.114 NA  |        |
| A010467_01 | 0.046     | -0.015    | -0.418 | 0.482     | 0.061     | -0.206 | -0.165 NA |        |
| A010469_01 | -0.204    | 0.013     | 0.189  | 0.408     | 0.182     | 0.016  | -0.012    | -0.088 |
| A010473_01 | -0.164    | -0.094 NA |        | 0.15      | 0.112     | 0.055  | -0.171 NA |        |
| A010480_01 | 0.384     | 0.145     | -0.243 | 0.126     | 0.238 NA  |        | 0.035     | 0.081  |
| A010481_01 | -0.128    | -0.339    | -0.751 | -0.476    | -0.284    | -0.721 | -0.689    | -0.358 |
| A010495_01 | -0.276    | -0.293    | -0.868 | -0.655    | -0.076    | -0.185 | -0.459    | -0.173 |
| A010498_01 | 0.408     | 0.336     | -0.364 | -0.234    | 0.194     | 0.167  | -0.226    | -0.293 |
| A010502_01 | -0.026    | -0.074    | -0.05  | -0.04     | 0.338     | 0.497  | 0.04      | -0.11  |
| A010504_01 | -0.005    | -0.117    | -0.045 | 0.31      | 0.121     | -0.128 | -0.122    | -0.174 |
| A010506_01 | 0.062     | 0.249     | 0.704  | 0.699     | -0.32     | -0.428 | 0.486     | 0.673  |
| A010508_01 | -0.231    | -0.301    | -0.187 | -0.501    | 0.1       | 0.046  | -0.089 NA |        |
| A010516_01 | -0.113    | -0.141    | 0.029  | 0.33      | 0.082     | 0.041  | -0.052    | -0.008 |
| A010517_01 | -0.4      | -0.661    | -0.624 | 0.472     | -0.705    | -1.097 | -0.634    | -0.53  |
| A010518_01 | -0.098    | -0.453    | -0.574 | -0.144    | -1.062    | -1.551 | -0.229    | -0.206 |
| A010522_01 | 0.565     | 0.437 NA  | NA     |           | 0.263     | 0.104  | -0.012 NA |        |
| A010526_01 | 0.288     | 0.038     | 0.339  | 0.621     | 0.077     | -0.152 | 0.057 NA  |        |
| A010527_01 | -0.594    | -0.766    | -0.191 | -0.391    | 0.103     | -0.021 | -0.23     | -0.499 |
| A010534_01 | -0.146    | -0.335 NA |        | -0.383    | 0.134     | 0.2 NA |           | -0.023 |
| A010535_01 | -0.364    | -0.255    | -0.03  | -0.399    | -0.176    | 0.097  | -0.065    | 0.135  |
| A010538_01 | 0.183     | 0.182     | 0.305  | 0.477     | -0.144    | -0.079 | 0.04 NA   |        |
| A010541_01 | -1.273    | -1.021    | -0.817 | -0.334    | -0.706    | -0.659 | -0.391    | -0.157 |
| A010544_01 | 0.331     | 0.14      | 0.185  | -0.284    | 0.108     | 0.042  | 0.089     | 0.017  |

|            |           |           |        |          |           |        |           |        |
|------------|-----------|-----------|--------|----------|-----------|--------|-----------|--------|
| A010548_01 | 0.576     | 0.421     | 0.228  | 0.318    | -0.024    | -0.286 | 0.076     | -0.017 |
| A010549_01 | 0.378     | 0.417     | 0.379  | -0.045   | 0.132 NA  |        | 0.275 NA  |        |
| A010555_01 | -1.106    | -1.132    | -0.737 | -1.016   | -0.291    | -0.176 | -0.382    | -0.425 |
| A010557_01 | -0.353    | -0.478    | -0.285 | -0.142   | 0.031     | -0.302 | 0.087     | -0.095 |
| A010559_01 | -0.328    | -0.196    | -0.438 | 0.161    | -0.047    | -0.112 | -0.117    | 0.022  |
| A010563_01 | -0.276    | -0.441 NA |        | -0.8     | -0.238    | -0.248 | -0.425    | -0.283 |
| A010564_01 | 0.296     | 0.102     | -0.075 | -0.132   | 0.166     | 0.229  | 0.24      | 0.046  |
| A010568_01 | 0.015     | -0.015    | -0.16  | 0.162    | 0.163     | 0.413  | 0.09      | 0.129  |
| A010571_01 | -0.064    | -0.341    | -0.508 | 0.02     | -0.26     | -0.642 | -0.25     | -0.163 |
| A010573_01 | -0.123    | -0.047    | -0.156 | 0.048    | 0.144     | -0.032 | -0.001    | 0.019  |
| A010578_01 | 0.325     | 0.317     | 0.484  | 0.592    | -0.24     | -0.482 | -0.211    | -0.1   |
| A010579_01 | 0.424     | 0.462     | 0.499  | 1.061    | 0.341     | 0.28   | 0.22      | 0.287  |
| A010582_01 | -0.175    | -0.131    | -0.387 | -0.101   | -0.347    | -0.496 | -0.215    | 0.092  |
| A010591_01 | 0.373     | 0.393     | 0.197  | 0.093 NA |           | 0.506  | 0.163     | 0.277  |
| A010592_01 | 0.325     | 0         | 0.434  | 0.216    | 0.049     | 0.273  | 0.307     | 0.115  |
| A010593_01 | -0.61     | -0.305    | 0.023  | 0.006    | -0.242    | -0.143 | -0.197    | -0.034 |
| A010595_01 | 0.047     | 0.033     | 0.023  | 0.268    | 0.042     | -0.277 | -0.072    | -0.154 |
| A010599_01 | 0.9       | 0.761     | 0.123  | 0.289    | -0.307    | -0.141 | -0.161    | -0.014 |
| A010601_01 | -0.707    | -0.448    | 0.021  | 0.199    | -0.174    | -0.178 | 0.161     | 0.154  |
| A010602_01 | -0.426    | -0.445    | -0.242 | -0.16    | -0.148    | -0.278 | -0.25     | -0.159 |
| A010603_01 | -0.082 NA |           | -0.248 | 0.051    | 0.095 NA  |        | -0.346 NA |        |
| A010604_01 | 0.092     | 0.14      | 0.071  | 0.028    | 0.261     | 0.174  | 0.216 NA  |        |
| A010605_01 | 0.198     | -0.057    | -0.002 | 0.277    | 0.064     | -0.034 | -0.058    | -0.124 |
| A010606_01 | -0.002    | -0.086    | -0.385 | -0.207   | 0.151     | -0.067 | -0.324    | -0.418 |
| A010607_01 | 0.357     | 0.424     | 0.06   | -0.124   | 0.362     | 0.341  | 0.106     | 0.082  |
| A010608_01 | 0.002     | 0.009     | 0.031  | 0.032    | 0.112     | 0.128  | 0.287     | 0.21   |
| A010611_01 | 0.247     | 0.443     | -0.221 | -0.438   | 0.429     | 0.486  | 0.168     | 0.179  |
| A010612_01 | 0.412     | 0.475     | 0.581  | 0.444    | 0.316     | 0.416  | 0.044     | 0.032  |
| A010615_01 | 0.247     | 0.193     | 0.225  | 0.205    | 0.311     | 0.159  | -0.044    | -0.067 |
| A010616_01 | 0.549     | 0.407     | -0.503 | -0.026   | 0.172     | -0.052 | -0.051    | -0.143 |
| A010617_01 | 0.008     | -0.011    | -0.246 | -0.501   | -0.006    | -0.158 | -0.101    | -0.203 |
| A010619_01 | -0.83     | -0.44     | -0.748 | -0.344   | -0.442    | 0.007  | -0.203    | 0.018  |
| A010624_01 | 0.298     | 0.158     | -0.55  | -0.713   | 0.043     | 0.011  | -0.139    | -0.157 |
| A010625_01 | -0.146    | -0.033    | 0.286  | -0.197   | 0.157     | 0.111  | -0.046    | 0.082  |
| A010626_01 | 0.061     | 0.172     | 0.239  | 0.459    | 0.04      | 0.009  | 0.173     | 0.173  |
| A010628_01 | 0.105     | 0.024     | -0.26  | 0.23     | -0.068    | -0.037 | -0.165    | -0.051 |
| A010629_01 | -0.049    | -0.244    | -0.177 | -0.485   | -0.002    | -0.428 | -0.136    | -0.12  |
| A010632_01 | -1.506    | -1.677 NA |        | 0.087    | -0.396    | -0.593 | -0.277 NA |        |
| A010633_01 | 0.361     | 0.355     | 0.201  | 0.625    | 0.381     | 0.468  | 0.107     | 0.064  |
| A010634_01 | 0.37      | 0.526     | -0.008 | 0.322    | -0.05     | 0.043  | -0.134    | -0.108 |
| A010636_01 | 0.032     | -0.306    | -0.208 | 0.337    | 0.098     | -0.164 | -0.14     | -0.227 |
| A010637_01 | 0.124     | -0.07     | 0.044  | 0.448    | 0.157     | 0.061  | -0.051    | -0.032 |
| A010638_01 | -0.164    | -0.181    | 0.07   | 0.618    | 0.072     | -0.003 | 0.295     | 0.104  |
| A010643_01 | 0.326     | 0.227     | 0.337  | -0.002   | 0.062     | -0.087 | 0.006     | -0.09  |
| A010645_01 | 0.136     | 0.25      | 0.358  | 0.182    | -0.16     | -0.08  | 0.01      | 0.122  |
| A010647_01 | 0.368     | 0.259     | -0.113 | 0.185    | -0.041    | 0.061  | -0.266    | -0.162 |
| A010648_01 | -1.1      | -1.234    | -0.285 | -0.572   | -1.07     | -1.069 | -0.125    | 0.115  |
| A010650_01 | 0.092     | 0.064     | -0.165 | -0.374   | -0.022    | 0.045  | -0.15     | -0.098 |
| A010652_01 | 0.052     | -0.088    | 0.007  | 0.173    | 0.167     | -0.031 | 0.038     | 0.006  |
| A010656_01 | -0.453    | -0.473    | 0.06   | -0.008   | -0.126    | -0.511 | -0.167    | 0.023  |
| A010658_01 | 0.54      | 0.706     | 0.059  | -0.426   | 0.85      | 0.957  | -0.189    | -0.101 |
| A010659_01 | -0.273    | -0.306    | -0.196 | -0.037   | 0.041     | -0.236 | 0.103     | 0.069  |
| A010660_01 | -0.38     | -0.785    | -0.249 | -0.04    | -0.558    | -0.89  | -0.558    | -0.368 |
| A010663_01 | 0.033     | -0.208    | -0.022 | 0.157    | 0.253     | 0.089  | -0.063    | 0.015  |
| A010666_01 | 0.551     | 0.607     | 0.655  | 0.515    | 0.417     | 0.536  | -0.108    | 0.002  |
| A010669_01 | -1.553    | -1.518    | -0.825 | -0.63    | -0.85     | -0.909 | -0.529    | -0.335 |
| A010676_01 | -0.233    | 0.021     | -0.153 | -0.109   | 0.413     | 0.525  | 0.774     | 0.728  |
| A010677_01 | -0.217    | -0.18     | -0.244 | -0.556   | 0.078     | 0.113  | -0.21     | -0.238 |
| A010678_01 | -0.224    | -0.241    | -0.198 | -0.008   | 0.24      | 0.102  | 0.113     | 0.051  |
| A010679_01 | 0.174     | -0.031    | 0.089  | 0.192    | -0.016    | -0.206 | 0.045     | -0.016 |
| A010681_01 | -0.38     | -0.534    | -0.069 | 0.216    | 0.058     | -0.118 | 0.226     | 0.099  |
| A010689_01 | -0.17     | -0.18     | -0.198 | -0.401   | -0.439 NA |        | 0.266     | 0.236  |
| A010690_01 | -0.166    | -0.038    | 0.024  | -0.334   | -0.178    | -0.039 | 0.014     | 0.143  |
| A010693_01 | -0.503    | -0.536    | -0.261 | -0.133   | 0.052     | -0.021 | 0.086     | -0.05  |
| A010696_01 | 0.021     | -0.354    | 0.147  | -0.012   | 0.336     | 0.151  | -0.356    | -0.295 |
| A010698_01 | -0.223    | -0.494    | 0.254  | 0.301    | 0.08      | -0.145 | 0.243     | 0.016  |
| A010699_01 | 0.139     | 0.485     | 0.316  | 0.525    | -0.023    | -0.135 | 0.014     | 0.13   |
| A010701_01 | -1.103    | -0.934 NA | NA     |          | -0.311    | -0.225 | -0.686    | -0.276 |

|            |           |           |           |        |           |        |           |        |
|------------|-----------|-----------|-----------|--------|-----------|--------|-----------|--------|
| A010704_01 | 0.167     | -0.001    | -0.206    | -0.79  | 0.061     | -0.038 | -0.332    | -0.327 |
| A010706_01 | -0.173    | -0.294    | -0.132    | -0.429 | -0.233    | 0.183  | 0.03      | 0.069  |
| A010708_01 | 0.71      | 0.917     | 0.679     | 0.672  | 0.035     | 0.379  | 0.373     | 0.338  |
| A010709_01 | 0.071     | 0.11      | 0.255     | 0.227  | 0.169     | -0.145 | 0.131     | 0.124  |
| A010710_01 | 0.102     | -0.061    | -0.191    | 0.07   | 0.147     | -0.041 | 0.03      | 0.044  |
| A010713_01 | 0.128     | 0.021     | -0.252    | 0.264  | -0.106 NA |        | 0.003     | -0.046 |
| A010715_01 | -0.613    | -0.623    | -0.421    | 0.169  | -0.223    | -0.273 | -0.124    | -0.113 |
| A010720_01 | 0.083     | -0.071 NA |           | NA     | -0.133    | -0.328 | 0.01 NA   |        |
| A010724_01 | 0.547     | 0.381     | 0.395     | 0.159  | -0.083    | 0.105  | -0.157    | -0.106 |
| A010725_01 | -0.029    | 0.09      | 0.142     | -0.175 | -0.036    | -0.092 | -0.118    | -0.169 |
| A010727_01 | 0.449     | 0.296     | -0.423    | -0.039 | 0.113     | 0.065  | -0.124    | -0.232 |
| A010729_01 | -0.116    | -0.086    | 0.165     | 0.1    | -0.109    | -0.094 | -0.007    | -0.022 |
| A010731_01 | 1.049     | 0.902     | 0.613     | 1.538  | -0.139 NA |        | 0.685     | 0.5    |
| A010732_01 | 0.281     | 0.172     | 0.005     | -0.049 | 0.281     | 0.311  | 0.097     | 0.135  |
| A010733_01 | 0.451     | 0.511     | -0.092    | 0.441  | 0.051     | 0.019  | -0.416    | -0.424 |
| A010734_01 | 0.342     | 0.262     | -0.285    | -0.356 | 0.274     | 0.278  | 0.086     | -0.13  |
| A010737_01 | -0.153    | -0.089    | -0.197    | 0.103  | -0.16     | -0.073 | -0.079 NA |        |
| A010739_01 | 0.94      | 0.742     | 0.572     | 0.514  | 0.68      | 0.794  | 0.758     | 0.62   |
| A010744_01 | -0.628 NA |           | -0.355 NA |        | -0.319 NA |        | 0.167 NA  |        |
| A010745_01 | -0.033    | 0.05      | 0.089 NA  |        | 0.074     | 0.169  | 0.073 NA  |        |
| A010749_01 | 0.106     | 0.14      | 0.206     | 0.123  | -0.089    | -0.022 | 0.324     | 0.228  |
| A010750_01 | -0.091    | 0.141     | 0.075     | 0.067  | -0.269    | -0.354 | 0.074     | 0.317  |
| A010751_01 | -0.028 NA |           | 0.089     | 0.407  | 0.074     | -0.146 | 0.173     | 0.175  |
| A010756_01 | 0.471     | 0.245     | 0.37      | 0.28   | 0.234     | 0.121  | -0.029 NA |        |
| A010758_01 | -0.013    | 0.032     | 0.013     | -0.01  | -0.18     | -0.001 | 0.092     | 0.178  |
| A010759_01 | -0.119    | -0.299    | -0.051    | 0.167  | 0.096 NA  |        | -0.065 NA |        |
| A010772_01 | 0.143     | 0.349     | -0.2      | -0.006 | -0.015    | 0.26   | -0.101    | 0.054  |
| A010775_01 | 0.007     | -0.026    | 0.192     | 0.161  | 0.252     | 0.012  | 0.16 NA   |        |
| A010776_01 | -0.117    | -0.31     | -0.208    | -0.01  | 0.024     | -0.027 | -0.14     | -0.01  |
| A010781_01 | -0.528    | -0.864    | -0.419    | 0.166  | -0.087    | -0.324 | -0.145    | -0.179 |
| A010790_01 | -0.785    | -0.691    | -0.933    | -0.658 | -0.248    | -0.159 | -0.122    | 0.081  |
| A010803_01 | -0.236    | -0.2      | 0.098     | 0.139  | 0.032 NA  |        | 0.083     | -0.05  |
| A010804_01 | -0.657    | -0.491    | 0.071     | 0.502  | 0.061     | 0.201  | 0.629     | 0.597  |
| A010805_01 | 0.128     | -0.035    | -0.064    | -0.007 | -0.088    | -0.025 | -0.028    | 0.009  |
| A010815_01 | 0.003     | 0.211     | -0.097    | 0.106  | 0.35      | 0.464  | 0.012     | 0.053  |
| A010819_01 | -0.451    | -0.506    | 0.286     | 0.454  | -0.106    | -0.617 | 0.248     | 0.07   |
| A010822_01 | -0.52     | -0.415    | -0.78     | -0.905 | -0.244    | -0.331 | -0.137 NA |        |
| A010834_01 | -0.041    | 0.043     | -0.079    | 0.187  | -0.163    | -0.044 | -0.106 NA |        |
| A010837_01 | 0.019     | 0.174     | 0.151     | 0.064  | 0.011     | 0.108  | -0.046    | 0.097  |
| A010846_01 | -0.218    | -0.001    | 0.191     | 0.443  | 0.319     | 0.193  | 0.397     | 0.289  |
| A010851_01 | 0.167     | 0.047     | -0.074    | 0.139  | 0.165     | 0.078  | 0.312     | 0.239  |
| A010863_01 | 0.733     | 0.652     | 0.774     | 0.855  | 0.59      | 0.713  | -0.211    | -0.105 |
| A010869_01 | -0.099    | 0.013     | -0.117    | -0.011 | -0.001    | -0.173 | -0.209    | -0.268 |
| A010874_01 | -0.586    | -0.441    | -0.197    | -0.208 | -0.028    | -0.058 | 0.291     | 0.246  |
| A010875_01 | 0.809     | 0.455     | 0.354     | -0.667 | 0.155     | 0.423  | 0.252     | -0.057 |
| A010876_01 | 0.371     | 0.19      | 0.137     | 0.367  | 0.211     | 0.047  | -0.049 NA |        |
| A010877_01 | 0.378     | 0.06      | 0.497     | 0.416  | 0.211     | -0.071 | 0.13 NA   |        |
| A010879_01 | 0.267     | 0.06      | 0.125     | 0.118  | 0.093     | -0.21  | 0.002     | -0.325 |
| A010881_01 | 0.43      | 0.363     | -0.015    | -0.669 | 0.293     | 0.504  | -0.229    | -0.316 |
| A010885_01 | 0.074     | 0.15      | -0.243    | -0.533 | -0.061    | 0.11   | 0.016     | -0.084 |
| A010887_01 | -0.037    | -0.058    | -0.055    | 0.202  | 0.072     | -0.039 | -0.082 NA |        |
| A010892_01 | -0.015    | 0.119     | 0.097     | 0.263  | -0.01     | -0.176 | -0.057    | 0.046  |
| A010893_01 | 0.144     | 0.215     | -0.087    | 0.114  | -0.091    | -0.132 | -0.088    | -0.026 |
| A010898_01 | 0.583     | 0.624     | 0.642     | 1.057  | 0.014     | 0.026  | 0.157     | 0.345  |
| A010902_01 | -0.828    | -0.877    | -0.643    | -0.965 | -0.259    | -0.28  | 0.066     | -0.049 |
| A010909_01 | 0.029     | 0.028     | 0.01      | 0.391  | -0.06     | -0.184 | -0.137    | -0.044 |
| A010911_01 | 0.788     | 0.952     | 0.331     | 0.704  | 0.579     | 0.54   | 0.122     | 0.113  |
| A010912_01 | -0.009    | 0.141     | 0.667     | 0.498  | 0.058 NA  |        | 0.495     | 0.285  |
| A010915_01 | -0.394    | -0.307    | -0.293    | -0.515 | -0.231    | -0.302 | -0.367    | -0.151 |
| A010916_01 | 0.149     | -0.006    | 0.348     | 0.013  | 0.346     | 0.077  | 0.463     | 0.12   |
| A010926_01 | -0.166    | -0.182    | -0.032    | 0.263  | -0.084    | -0.46  | 0.134     | 0.086  |
| A010929_01 | 0.085     | 0.148     | -0.189    | -0.21  | -0.03     | 0.163  | -0.017 NA |        |
| A010934_01 | 0.238     | 0.138     | 0.004     | 0.235  | 0.244     | -0.054 | -0.178    | -0.19  |
| A010935_01 | -0.758    | -1.002    | -0.429    | -0.199 | -0.42     | -0.67  | -0.314 NA |        |
| A010938_01 | 0.343     | 0.596     | 0.607     | 0.024  | 0.306     | 0.142  | 0.063     | 0.108  |
| A010941_01 | -0.128    | 0.096     | -0.06     | 0.08   | -0.105    | 0.092  | -0.167    | 0.114  |
| A010942_01 | -0.033    | -0.034    | 0.119     | 0.005  | 0.146     | 0.117  | 0.081     | -0.046 |
| A010943_01 | -0.303    | -0.23     | -0.367    | 0.111  | 0.008     | -0.269 | 0.02      | -0.117 |

|            |           |           |           |           |          |        |           |        |
|------------|-----------|-----------|-----------|-----------|----------|--------|-----------|--------|
| A010947_01 | -0.126    | -0.012    | -0.238    | 0.16      | 0.022    | 0.005  | -0.088    | -0.089 |
| A010948_01 | 0.447 NA  |           | 0.043     | 0.613 NA  | NA       |        | -0.067 NA |        |
| A010949_01 | -1.456    | -1.894 NA |           | -1.652    | -0.926   | -1.406 | -1.128    | -0.827 |
| A010951_01 | -0.228    | -0.051    | -0.332    | -0.206    | 0.099    | 0.078  | -0.238    | -0.025 |
| A010955_01 | 0.172     | 0.346     | 0.554     | 0.618     | 0.445    | 0.73   | 0.593     | 0.382  |
| A010958_01 | -3.074 NA | NA        | NA        |           | -1.997   | -2.743 | -2.016    | -1.416 |
| A010960_01 | 0.161     | 0.214     | 0.14 NA   |           | 0.055    | -0.062 | -0.062    | -0.004 |
| A010961_01 | -1.537    | -1.599    | -0.904    | -1.432    | -0.562   | -0.761 | -0.68     | -0.442 |
| A010963_01 | -0.107    | -0.115    | -0.164    | -0.271    | 0.014    | 0.109  | -0.045    | -0.121 |
| A010964_01 | -0.523    | -0.922    | -0.424    | -0.298    | -0.114   | -0.336 | 0.2       | 0.036  |
| A010973_01 | 0.433     | 0.529     | 0.4       | 0.027     | 0.025    | -0.386 | 0.206     | 0.044  |
| A010976_01 | 0.279     | 0.151     | 0.064     | 0.132     | 0.218    | 0.19   | 0.001     | -0.149 |
| A010980_01 | 0.037 NA  |           | -0.228    | -0.338 NA |          | 0.404  | -0.05     | -0.248 |
| A010995_01 | 0.192     | 0.047     | -0.269    | 0.172     | 0.108    | -0.014 | 0.024     | -0.104 |
| A010996_01 | -0.974    | -0.871    | -0.53     | 0.05      | -0.216   | -0.342 | -0.065    | -0.115 |
| A011002_01 | 0.173     | 0.351     | -0.016    | -0.004    | -0.019   | 0.173  | 0.15      | 0.206  |
| A011007_01 | -1.04     | -1.035    | -0.851    | -0.563    | -0.153   | -0.071 | 0.224     | 0.158  |
| A011019_01 | -0.359    | -0.546    | -0.434    | -0.803    | -0.091   | -0.376 | -0.218    | -0.371 |
| A011021_01 | 0.351     | 0.483 NA  |           | -0.124    | 0.142    | 0.227  | 0.062     | -0.046 |
| A011029_01 | -0.67     | -0.656    | -0.071 NA |           | -0.18    | -0.354 | -0.089 NA |        |
| A011033_01 | -0.199    | -0.456    | -0.328    | -0.109    | 0.079    | 0.133  | -0.119    | -0.145 |
| A011038_01 | -0.254    | -0.435    | -0.579    | -0.26     | -0.029   | -0.175 | -0.241    | -0.196 |
| A011039_01 | -0.116    | -0.117    | 0.082     | 0.071     | -0.187   | -0.229 | 0.017     | -0.01  |
| A011040_01 | -0.174    | -0.162    | 0.184     | -0.254    | 0.326    | 0.292  | 0.117     | 0.169  |
| A011046_01 | 0.331     | 0.133     | 0.519     | 0.498     | 0.077    | -0.351 | 0.258     | 0.13   |
| A011048_01 | 0.658     | 0.435     | 0.451     | 0.405     | 0.421    | 0.274  | 0.42      | 0.422  |
| A011054_01 | -0.19     | -0.16     | -0.15     | 0.29      | 0.233    | -0.031 | -0.06     | -0.111 |
| A011055_01 | 0.42      | 0.376     | 0.164     | 0.082     | 0.084    | -0.078 | -0.127 NA |        |
| A011064_01 | -0.358    | -0.459    | -0.01     | -0.193    | -0.031   | -0.288 | -0.189    | -0.2   |
| A011068_01 | -0.145    | -0.059    | 0.272     | 0.049     | 0.024    | -0.208 | 0.209     | 0.137  |
| A011077_01 | -0.125 NA |           | 0.249     | 0.568     | 0.216 NA |        | -0.104 NA |        |
| A011078_01 | -0.506    | -0.695    | -0.416    | -0.098    | -0.169   | -0.441 | 0.225     | 0.116  |
| A011085_01 | 0.206     | 0.163     | -0.031    | -0.213    | 0.102    | -0.128 | 0.491     | 0.176  |
| A011089_01 | 0.43      | 0.351     | 0.423     | 0.122     | 0.017    | 0.001  | 0.01      | -0.058 |
| A011090_01 | 0.29      | 0.257     | -0.461    | -0.419    | 0.357    | 0.186  | -0.069    | -0.207 |
| A011094_01 | 0.264     | 0.073     | -0.375    | -0.575    | 0.235    | 0.347  | -0.391    | -0.342 |
| A011096_01 | -0.037 NA | NA        |           | 0.107     | 0.165 NA | NA     | NA        |        |
| A011104_01 | 0.066     | -0.051    | 0.128     | 0.289     | -0.108   | -0.218 | 0.46      | 0.404  |
| A011108_01 | 0.275     | -0.002    | 0.221     | -0.123    | 0.322    | 0.373  | 0.252     | -0.101 |
| A011109_01 | -0.35     | -0.46     | -0.562    | -0.843    | -0.119   | -0.099 | -0.318    | -0.402 |
| A011114_01 | -0.326    | -0.105    | 0.073     | -0.903    | 0.021    | 0.211  | -0.081    | -0.073 |
| A011121_01 | -0.503    | -0.523    | -0.099    | -0.428    | -0.261   | -0.53  | -0.176    | -0.134 |
| A011124_01 | 0.237     | 0.151     | -0.449    | -0.457    | 0.334    | 0.248  | 0.086     | 0.096  |
| A011130_01 | -0.208    | -0.119    | -0.379    | -0.299    | 0.255    | 0.514  | -0.37     | -0.202 |
| A011132_01 | -0.077    | -0.064    | 0.187     | 0.364     | 0.059    | -0.139 | 0.112 NA  |        |
| A011133_01 | 0.194     | 0.341     | -0.062    | -0.076    | 0.269    | 0.304  | 0.164     | 0.19   |
| A011142_01 | -0.135    | -0.264    | -0.258    | 0.158     | 0.078    | -0.069 | 0.129     | -0.022 |
| A011146_01 | -3.144    | -3.589    | -2.826    | -3.334    | -1.929   | -2.79  | -2.479    | -2.046 |
| A011148_01 | 0.1       | 0.21      | -0.487    | -0.073    | 0.158    | -0.059 | -0.33     | -0.087 |
| A011153_01 | 0.317     | 0.23      | 0.415     | 0.467     | 0.204    | -0.193 | 0.224     | 0.138  |
| A011159_01 | -0.295    | -0.017    | 0.014     | 0.593     | -0.137   | -0.303 | -0.26     | 0.071  |
| A011163_01 | 0.389     | 0.459     | 0.461     | -0.243    | 0.402    | 0.503  | 0.198     | 0.066  |
| A011164_01 | 0.501 NA  |           | -0.377    | -0.158    | 0.035 NA |        | 0.15      | 0.024  |
| A011167_01 | 0.429     | 0.369     | 0.261     | 0.256     | 0.252    | 0.288  | -0.046 NA |        |
| A011171_01 | -0.634    | -0.433    | 0.064     | -0.379    | -0.149   | -0.211 | -0.077    | 0.02   |
| A011187_01 | -0.185 NA |           | -0.762    | -0.883    | 0.181 NA |        | 0.063     | -0.152 |
| A011189_01 | 0.196     | 0.001     | -0.426    | -0.485    | 0.214    | 0.248  | 0.034     | 0.081  |
| A011190_01 | 0.408     | 0.561     | 0.36      | 0.556     | 0.33     | 0.644  | 0.543     | 0.571  |
| A011193_01 | 0.295     | 0.608     | 0.566     | 0.34      | 0.698    | 0.922  | 0.936     | 1.002  |
| A011194_01 | 0.198     | -0.041    | -0.087    | -0.21     | 0.125    | -0.242 | -0.044    | -0.078 |
| A011198_01 | -1.347    | -1.877    | 0.132     | -0.559    | -0.108   | -0.632 | -0.685    | -0.811 |
| A011199_01 | -0.025    | -0.102    | -0.013    | -0.386    | -0.422   | -0.748 | 0.184     | 0.03   |
| A011200_01 | 0.004     | -0.215    | 0.152     | 0.263     | 0.18     | 0.148  | 0.248     | 0.114  |
| A011203_01 | -0.506 NA | NA        |           | -0.485    | -0.236   | -0.49  | -0.424 NA |        |
| A011208_01 | 0.021     | -0.065    | -0.301 NA |           | 0.039    | -0.306 | -0.31 NA  |        |
| A011223_01 | 0.062     | -0.063    | 0.049     | 0.199     | 0.078    | -0.19  | -0.05     | 0.024  |
| A011226_01 | 0.729     | 0.395     | 0.435 NA  |           | 0.413    | 0.219  | 0.193 NA  |        |
| A011227_01 | -0.54     | -0.465    | 0.642     | 0.714     | 0.019    | 0.136  | 1.031     | 0.954  |

|            |        |        |        |        |        |        |        |        |
|------------|--------|--------|--------|--------|--------|--------|--------|--------|
| A011228_01 | -0.156 | -0.209 | 0.189  | 0.334  | -0.74  | -0.971 | -0.867 | -0.638 |
| A011231_01 | 0.32   | 0.173  | -0.101 | 0.284  | 0.298  | 0.393  | -0.052 | -0.125 |
| A011242_01 | -0.102 | -0.191 | 0.074  | 0.04   | -0.139 | -0.073 | -0.105 | 0.021  |
| A011250_01 | 0.333  | 0.236  | 0.437  | -0.175 | 0.304  | 0.302  | 0.154  | 0.09   |
| A011263_01 | 0.277  | 0.131  | 0.145  | -0.018 | 0.036  | -0.02  | 0.125  | -0.023 |
| A011267_01 | 0.697  | 0.646  | 0.6    | 0.628  | 0.169  | -0.075 | 0.365  | 0.129  |
| A011270_01 | 0.503  | 0.484  | 0.391  | 0.003  | 0.364  | 0.58   | 0.256  | 0.364  |
| A011274_01 | 0.835  | 0.834  | 0.851  | 0.922  | -0.196 | -0.341 | -0.334 | -0.256 |
| A011285_01 | -1.098 | -1.226 | -0.583 | -1.133 | -0.552 | -0.66  | -0.1   | -0.028 |
| A011288_01 | 0.012  | 0.048  | 0.715  | 1.019  | 0.661  | 0.466  | 0.581  | 0.183  |
| A011296_01 | 0.409  | 0.565  | -0.419 | 0.04   | 0.325  | 0.327  | -0.231 | -0.309 |
| A011301_01 | -0.097 | -0.005 | -0.036 | -0.031 | -0.151 | -0.043 | 0.082  | 0.147  |
| A011304_01 | 0.287  | 0.38   | 0.234  | 0.213  | -0.165 | 0.004  | -0.154 | 0.14   |
| A011306_01 | 0.197  | 0.253  | -0.108 | -0.411 | 0.254  | 0.327  | 0.138  | -0.075 |
| A011307_01 | 0.1    | 0.495  | 0.934  | 0.773  | 0.625  | 0.632  | -0.098 | 0.114  |
| A011311_01 | -0.049 | -0.178 | -0.107 | -0.529 | 0.105  | 0.046  | 0.086  | -0.052 |
| A011320_01 | 0.816  | 0.707  | 1.261  | 1.716  | -0.028 | -0.397 | -1.044 | -0.799 |
| A011322_01 | -0.153 | -0.39  | -0.367 | -0.799 | 0.156  | 0.201  | 0.216  | 0.142  |
| A011323_01 | -0.118 | -0.078 | -0.124 | 0.184  | -0.04  | -0.165 | -0.041 | -0.153 |
| A011326_01 | 0.067  | 0.166  | -0.428 | -0.049 | -0.194 | -0.095 | -0.283 | -0.043 |
| A011331_01 | -0.212 | -0.666 | -0.711 | -0.251 | -0.176 | -0.507 | -0.853 | -0.518 |
| A011336_01 | -0.233 | -0.263 | -0.033 | -0.21  | -0.09  | -0.188 | -0.077 | -0.14  |
| A011338_01 | -0.265 | -0.337 | -0.402 | -0.304 | -0.223 | -0.452 | -0.339 | NA     |
| A011339_01 | -0.094 | 0.043  | 0.227  | 0.096  | -0.244 | -0.145 | -0.204 | -0.028 |
| A011341_01 | 0.054  | -0.257 | NA     | 0.087  | 0.092  | -0.141 | -0.03  | -0.094 |
| A011342_01 | 0.496  | 0.558  | -0.133 | -0.101 | 0.099  | 0.053  | -0.104 | -0.024 |
| A011343_01 | 0.567  | 0.728  | 0.414  | 0.354  | 0.4    | 0.449  | 0.042  | 0.151  |
| A011344_01 | -0.394 | -0.496 | -0.216 | 0.409  | -0.737 | -0.844 | -0.281 | -0.021 |
| A011349_01 | 0.168  | 0.034  | 0.187  | -0.276 | 0.27   | 0.105  | 0.129  | 0.077  |
| A011356_01 | -0.111 | NA     | -0.359 | 0.324  | -0.008 | NA     | 0      | 0.18   |
| A011359_01 | -3.321 | -3.911 | -2.991 | -3.438 | -2.136 | -2.481 | -1.766 | -1.442 |
| A011361_01 | 0.157  | 0.341  | 0.149  | -0.136 | -0.112 | -0.089 | 0.007  | 0.069  |
| A011372_01 | -0.146 | 0.07   | 0.155  | 0.572  | -0.078 | -0.502 | 0.042  | NA     |
| A011374_01 | -0.295 | -0.268 | 0.229  | -0.329 | -0.007 | -0.231 | 0.072  | 0.004  |
| A011382_01 | -0.124 | -0.259 | -0.235 | 0.049  | -0.219 | 0.007  | -0.11  | -0.013 |
| A011384_01 | -0.015 | 0.062  | 0.21   | -0.084 | 0.098  | -0.072 | 0.1    | -0.099 |
| A011385_01 | 0.18   | 0.091  | 0.002  | -0.154 | 0.114  | -0.004 | 0.183  | -0.035 |
| A011387_01 | -0.214 | -0.001 | -0.102 | 0.066  | 0.108  | 0.103  | -0.108 | NA     |
| A011390_01 | -0.188 | -0.106 | -0.279 | -0.337 | 0.005  | -0.334 | 0.005  | NA     |
| A011395_01 | -0.012 | 0.129  | 0.087  | -0.464 | 0.277  | 0.573  | 0.153  | 0.204  |
| A011396_01 | 0.198  | 0.217  | 0.135  | 0.332  | -0.236 | -0.458 | -0.264 | -0.048 |
| A011397_01 | -0.352 | -0.37  | -0.316 | -0.244 | -0.337 | -0.24  | -0.181 | 0.027  |
| A011407_01 | -0.284 | -0.276 | -1.083 | -0.974 | -0.304 | -0.196 | -0.662 | -0.342 |
| A011414_01 | 0.653  | 0.478  | 0.23   | -0.412 | 0.382  | 0.328  | 0.2    | 0.082  |
| A011416_01 | 0.16   | 0.226  | 0.403  | -0.206 | 0.293  | 0.347  | 0.226  | 0.149  |
| A011419_01 | 0.181  | 0.313  | 0.218  | 0.597  | -0.172 | -0.38  | -0.245 | -0.033 |
| A011422_01 | 0.079  | -0.04  | 0.049  | 0.043  | 0.148  | 0.062  | 0.053  | -0.089 |
| A011426_01 | 0.338  | NA     | -0.308 | -0.596 | 0.224  | NA     | 0.064  | -0.113 |
| A011428_01 | -0.011 | NA     | -0.036 | -0.315 | 0.104  | 0.066  | -0.13  | NA     |
| A011429_01 | 0.061  | 0.476  | 0.615  | -0.205 | 0.096  | 0.456  | -0.057 | NA     |
| A011435_01 | 0.344  | 0.323  | 0.057  | -0.32  | 0.208  | NA     | 0.05   | 0.142  |
| A011436_01 | -1.001 | -1.07  | NA     | -0.282 | -1.083 | -1.591 | -1.136 | -0.721 |
| A011441_01 | -0.55  | -0.391 | 0.129  | 0.075  | -0.222 | -0.301 | -0.407 | -0.293 |
| A011445_01 | -0.066 | -0.062 | 0.215  | -0.308 | 0.132  | 0.166  | 0.078  | 0.082  |
| A011446_01 | -0.059 | 0.142  | NA     | 0.249  | 0.136  | 0.076  | -0.182 | NA     |
| A011452_01 | 0.178  | 0.334  | 0.214  | 0.256  | 0.108  | 0.264  | 0.01   | 0.002  |
| A011455_01 | -0.364 | -0.229 | -0.071 | -0.012 | 0.094  | 0.071  | -0.114 | -0.247 |
| A011460_01 | 0.525  | 0.264  | 0.421  | 0.149  | NA     | 0.117  | 0.186  | 0.181  |
| A011461_01 | 0.778  | 0.085  | 0.092  | 0.017  | 0.535  | -0.127 | 0.05   | 0.152  |
| A011462_01 | 0.27   | -0.264 | -0.433 | 0.406  | 0.103  | -0.468 | -0.126 | -0.066 |
| A011471_01 | -0.022 | NA     | 0.007  | -0.256 | 0.091  | NA     | -0.099 | NA     |
| A011472_01 | 0.057  | -0.27  | 0.087  | 0.014  | 0.003  | 0.066  | 0.238  | 0.277  |
| A011474_01 | 0.236  | 0.085  | 0.52   | 0.162  | -0.044 | -0.12  | 0.008  | 0.097  |
| A011478_01 | 0.232  | -0.043 | -0.217 | -0.7   | 0.098  | 0.178  | -0.079 | -0.003 |
| A011479_01 | -0.121 | -0.001 | 0.377  | 0.395  | 0.083  | -0.046 | 0.187  | 0.036  |
| A011480_01 | 0.123  | 0.01   | 0.098  | -0.065 | 0.036  | 0.038  | 0.154  | -0.002 |
| A011486_01 | -0.11  | -0.047 | 0.01   | -0.128 | -0.229 | -0.122 | -0.029 | 0.202  |
| A011487_01 | -0.083 | NA     | -0.405 | -0.395 | -0.026 | -0.039 | 0.023  | 0.16   |

|            |           |           |        |        |           |        |           |        |
|------------|-----------|-----------|--------|--------|-----------|--------|-----------|--------|
| A011489_01 | 0.38      | 0.425     | 1.19   | 1.361  | 0.126     | -0.115 | 0.21 NA   |        |
| A011491_01 | -0.353    | -0.439 NA | NA     |        | 0.098     | -0.333 | 0.467     | 0.257  |
| A011505_01 | 0.468     | 0.835     | 0.842  | 0.85   | -0.084    | 0.24   | 0.469     | 0.373  |
| A011508_01 | -0.005    | -0.079    | 0.11   | -0.045 | -0.071    | -0.013 | 0.025     | 0.168  |
| A011510_01 | 0.191     | -0.057    | 0.043  | 0.056  | 0.104     | 0.075  | -0.041    | 0.109  |
| A011511_01 | 0.112     | -0.142    | 0.182  | 0.383  | -0.105    | -0.2   | -0.162    | -0.215 |
| A011512_01 | -0.257    | -0.202    | -0.303 | -0.193 | 0.093     | -0.153 | -0.221 NA |        |
| A011521_01 | 0.05      | 0.114     | 0.123  | -0.28  | 0.041     | 0.123  | -0.048    | -0.064 |
| A011522_01 | 0.364     | 0.385     | 0.206  | -0.147 | 0.182     | 0.278  | 0.144     | 0.084  |
| A011523_01 | -0.032    | 0.001     | 0.275  | 0.698  | -0.539    | -0.739 | -0.561 NA |        |
| A011526_01 | -0.257    | -0.423    | -0.314 | -0.328 | 0.014     | -0.15  | -0.066    | -0.075 |
| A011532_01 | -2.087    | -2.402    | -2.654 | -2.297 | -0.842    | -0.747 | -1.035    | -0.767 |
| A011533_01 | 0.668     | 0.67      | -0.079 | -1.032 | 0.406     | 0.374  | -0.106    | -0.029 |
| A011535_01 | -0.15     | -0.191    | 0.243  | 0.02   | -0.109    | -0.262 | -0.064    | -0.149 |
| A011536_01 | 0.544     | 0.371 NA  | NA     |        | -0.02 NA  | NA     | NA        |        |
| A011539_01 | -0.052    | -0.186    | -0.01  | -0.194 | -0.092    | -0.215 | -0.025    | -0.001 |
| A011540_01 | -0.096    | 0.051     | 0.303  | 0.091  | 0.1       | 0.087  | -0.07     | 0.145  |
| A011541_01 | 0.574     | 0.516     | 0.379  | -0.19  | 0.236     | 0.419  | 0.284     | 0.454  |
| A011544_01 | 0.115     | 0.124     | -0.124 | 0.037  | 0.23      | 0.224  | -0.005    | -0.169 |
| A011546_01 | 0.176     | -0.116    | 0.268  | -0.128 | 0.328     | 0.28   | -0.048    | -0.063 |
| A011548_01 | -1.091    | -1.144    | 0.152  | 0.717  | -2.454 NA |        | -1.328    | -1.141 |
| A011550_01 | -1.118    | -1.307    | -0.208 | -0.516 | -0.355    | -0.918 | -0.138    | -0.154 |
| A011557_01 | 0.052     | 0.108     | 0.291  | 0.122  | 0.127     | 0.02   | 0.086     | -0.018 |
| A011566_01 | 0.026     | 0.063     | 0.149  | -0.271 | 0.118     | 0.296  | 0.151     | 0.129  |
| A011569_01 | 0.379     | 0.215     | 0.502  | 0.543  | -0.102    | -0.204 | 0.142     | -0.024 |
| A011571_01 | 0.336     | 0.28      | 0.391  | 0.243  | 0.219     | 0.003  | -0.03 NA  |        |
| A011574_01 | 0.382     | 0.112     | 0.1    | -0.31  | -0.014    | 0.348  | 0.054     | 0.098  |
| A011575_01 | -0.448    | -0.665    | -0.636 | -0.205 | -0.152    | -0.287 | -0.038    | -0.057 |
| A011576_01 | -0.299    | -0.611    | -0.015 | 0.162  | 0.246     | -0.044 | 0.127     | -0.08  |
| A011584_01 | -0.084    | -0.044    | -0.086 | -0.297 | 0.184     | 0.352  | -0.007    | 0.029  |
| A011585_01 | 0.509     | 0.533     | 0.633  | -0.365 | 0.479     | 0.683  | 0.195     | 0.045  |
| A011589_01 | 0.167     | 0.039     | -0.045 | -0.413 | -0.042    | -0.028 | -0.108 NA |        |
| A011592_01 | 0.139     | 0.068     | -0.29  | -0.12  | 0.082     | 0.168  | -0.112    | -0.112 |
| A011593_01 | 0.601     | 0.726     | 0.014  | -0.578 | 0.26      | 0.549  | 0.066     | 0.066  |
| A011600_01 | -0.771    | -0.702    | -0.29  | -0.375 | -0.415    | -0.29  | -0.027    | 0.075  |
| A011601_01 | 0.917     | 0.9       | 0.984  | 1.358  | 0.409     | 0.723  | 0.639     | 0.566  |
| A011604_01 | 0.643     | 0.524     | 0.298  | 0.303  | 0.032     | -0.138 | 0.008     | -0.04  |
| A011606_01 | -1.35     | -1.313    | -1.1   | -0.759 | -0.438    | -0.737 | -0.523 NA |        |
| A011607_01 | 0.358     | 0.214     | 0.421  | 0.01   | 0.239     | 0.445  | 0.144     | 0.078  |
| A011610_01 | -0.47     | -0.378    | -0.213 | 0.05   | -0.019    | 0.001  | 0.195     | 0.21   |
| A011611_01 | -0.094    | -0.126    | -0.312 | -0.132 | 0.107     | -0.226 | -0.184    | -0.162 |
| A011613_01 | 0.509     | 0.614     | 0.395  | -0.531 | 0.265     | 0.47   | 0.406     | 0.413  |
| A011614_01 | 0.1       | 0.301     | 0.595  | 0.476  | -0.511    | -0.648 | 0.27      | 0.532  |
| A011619_01 | 0.742     | 0.688     | 0.376  | -0.731 | 0.416     | 0.531  | 0.276 NA  |        |
| A011622_01 | -0.926    | -0.795    | -0.614 | -0.833 | 0.222     | 0.342  | -0.173    | -0.152 |
| A011624_01 | 0.158 NA  |           | -0.326 | -0.075 | 0.105     | 0.188  | 0.078     | 0.16   |
| A011625_01 | 0.079     | 0.119     | -0.143 | 0.224  | -0.125    | -0.075 | -0.151 NA |        |
| A011629_01 | 0.218     | 0.521     | 0.424  | -0.083 | 0.063     | 0.062  | -0.116    | -0.013 |
| A011630_01 | 0.255     | 0.19      | 0.084  | -0.079 | 0.241     | 0.23   | 0.03 NA   |        |
| A011631_01 | 0.292     | 0.421     | -0.266 | -0.174 | 0.032     | 0.242  | 0.084     | 0.064  |
| A011634_01 | 0.027     | 0.068     | -0.712 | 0.255  | -0.136    | -0.201 | -0.196    | -0.241 |
| A011637_01 | 0.58      | 0.474     | -0.001 | -0.479 | 0.246 NA  |        | 0.063 NA  |        |
| A011650_01 | 0.102     | 0.005     | 0.012  | 0.016  | -0.101    | -0.117 | -0.145    | -0.182 |
| A011652_01 | 0.026     | 0.086     | -0.089 | -0.169 | 0.142     | 0.227  | -0.04     | 0.22   |
| A011653_01 | 0.001     | -0.011    | -0.2   | 0.031  | 0.068     | 0.016  | -0.103    | -0.067 |
| A011654_01 | 0.112     | 0.035     | 0.049  | 0.26   | 0.12      | 0.026  | 0.08      | -0.001 |
| A011655_01 | -0.214    | -0.257    | -0.015 | -0.515 | 0.34      | 0.098  | 0.12 NA   |        |
| A011658_01 | -0.566    | -0.415    | -0.985 | -0.85  | 0.192     | 0.443  | -0.872    | -0.645 |
| A011661_01 | -0.019    | 0.032     | -0.343 | 0.222  | 0.168     | 0.272  | 0.081     | -0.001 |
| A011662_01 | 0.197     | 0.123     | -0.419 | 0.176  | -0.389    | -0.693 | -0.252    | -0.214 |
| A011663_01 | -0.251    | -0.212    | 0.323  | 0.214  | 0.039     | -0.037 | -0.065    | -0.089 |
| A011665_01 | 0.069     | 0.138     | -0.213 | -0.273 | -0.006    | 0.267  | -0.003    | 0.021  |
| A011666_01 | 0.066     | -0.001    | -0.02  | -0.048 | -0.123    | -0.301 | -0.282 NA |        |
| A011671_01 | -0.366    | -0.251    | -0.202 | 0.056  | -0.205    | -0.107 | -0.542    | -0.099 |
| A011672_01 | 0.096 NA  |           | 0.084  | -0.603 | 0.212 NA  |        | 0.162 NA  |        |
| A011673_01 | -0.076    | -0.043    | 0.17   | -0.135 | 0.697     | 0.738  | 0.28      | 0.234  |
| A011674_01 | 0.261     | 0.456     | -0.123 | -0.072 | 0.156     | 0.112  | 0.036     | 0.034  |
| A011675_01 | -0.177 NA |           | 0.055  | -0.342 | 0.161 NA  |        | 0.309     | 0.357  |



|            |           |           |        |        |           |        |           |        |
|------------|-----------|-----------|--------|--------|-----------|--------|-----------|--------|
| A011677_01 | -0.238    | -0.364    | -0.462 | -0.039 | 0.061     | -0.129 | 0.177     | 0.011  |
| A011678_01 | -0.319    | -0.444    | -0.017 | -0.057 | 0.063     | -0.142 | 0.224 NA  |        |
| A011687_01 | -0.008    | 0.131     | 0.024  | -0.356 | 0.051     | 0.154  | 0         | 0.146  |
| A011689_01 | -0.22     | -0.165    | 0.637  | 0.588  | 0.213     | 0.12   | 0.721     | 0.61   |
| A011691_01 | 0.352     | 0.248     | 0.033  | -0.3   | 0.388     | 0.386  | 0.151     | 0.051  |
| A011692_01 | -0.2      | 0.091     | -0.061 | -0.304 | -0.085    | 0.276  | -0.034    | 0.159  |
| A011693_01 | -0.335 NA |           | -0.505 | 0.02   | -0.113 NA |        | -0.017    | 0.085  |
| A011694_01 | 0.088     | -0.004    | -0.032 | -0.318 | -0.151    | 0.184  | 0.081     | 0.187  |
| A011695_01 | 0.164     | 0.353     | -0.18  | -0.222 | 0.184     | 0.27   | -0.184    | -0.053 |
| A011696_01 | 0.195     | 0.283     | -0.126 | -0.262 | 0.251     | 0.457  | 0.103 NA  |        |
| A011700_01 | -0.541    | -0.132    | 0.027  | 0.059  | -0.066    | 0.044  | -0.195    | 0.155  |
| A011703_01 | 0.098     | -0.011    | 0.358  | -0.37  | 0.344     | 0.221  | 0.327     | 0.242  |
| A011712_01 | 0.31 NA   |           | 0.165  | -0.27  | 0.412 NA  |        | 0.305     | 0.244  |
| A011713_01 | 0.499 NA  |           | 0.217  | 0.102  | -0.16 NA  |        | 0.084     | -0.085 |
| A011716_01 | 0.175     | 0.054     | -0.131 | -0.244 | 0.139     | 0.269  | 0.116     | 0.077  |
| A011717_01 | 0.477     | 0.783     | -0.018 | 0.094  | -0.385    | -0.193 | -0.033    | 0.157  |
| A011718_01 | -0.193 NA |           | 0.166  | 0.514  | -0.072    | 0.52   | 0.312     | 0.441  |
| A011719_01 | 0.041     | 0.327     | 0.187  | -0.635 | 0.383     | 0.681  | 0.055     | 0.216  |
| A011720_01 | -0.86     | -0.658    | -0.338 | -0.13  | -0.348    | -0.36  | -0.109 NA |        |
| A011722_01 | 0.491     | 0.53      | 0.506  | 0.274  | -0.148    | -0.013 | -0.025    | 0.071  |
| A011724_01 | -0.329    | 0.079     | 0.382  | 0.13   | 0.201     | 0.161  | 0.025     | 0.316  |
| A011725_01 | 0.63      | 0.504     | 0.095  | -0.026 | 0.106     | 0.158  | 0.032     | -0.012 |
| A011726_01 | -1.355    | -1.236    | -1.26  | -0.643 | -0.368    | -0.133 | -0.167    | 0.072  |
| A011728_01 | -0.376    | -0.379    | -0.307 | 0.119  | 0.009     | -0.049 | 0.103     | -0.01  |
| A011732_01 | 0.047     | -0.007    | 0.427  | 0.058  | 0.071     | 0.227  | 0.343     | 0.523  |
| A011740_01 | 0.509 NA  |           | 0.166  | -0.309 | -0.038 NA |        | 0.712     | 0.497  |
| A011743_01 | -0.022    | 0.389     | 0.16   | -0.399 | -0.051    | 0.28   | -0.12     | -0.122 |
| A011749_01 | -0.104    | -0.331 NA |        |        | -0.076    | -0.299 | -0.066 NA |        |
| A011750_01 | -0.228    | -0.093    | 0.192  | 0.13   | 0.158     | 0.252  | -0.149    | -0.024 |
| A011752_01 | -0.161    | -0.003    | 0.187  | -0.177 | 0.061     | 0.249  | 0.068     | 0.103  |
| A011755_01 | -0.433    | 0.155     | 0.065  | 0.166  | -0.382    | 0.364  | 0.066     | 0.561  |
| A011757_01 | -0.118    | -0.098    | 0.049  | -0.37  | 0.071     | 0.242  | 0.052     | 0.115  |
| A011758_01 | -0.558    | -0.652    | -0.514 | -0.517 | -0.362    | -0.277 | -0.102    | 0.021  |
| A011760_01 | 0.313     | 0.52      | 0.235  | 0.549  | -0.204    | 0.023  | 0.006     | 0.138  |
| A011761_01 | 0.043     | -0.24     | -0.292 | 0.269  | -0.085    | -0.124 | 0.144     | 0.1    |
| A011762_01 | -0.011    | -0.068    | 0.05   | 0.233  | -0.139    | -0.173 | -0.138 NA |        |
| A011763_01 | 0.29      | 0.328     | 0.087  | 0.021  | 0.348     | 0.564  | -0.048    | -0.006 |
| A011764_01 | 0.362     | 0.227     | 0.336  | 0.076  | 0.253     | 0.084  | 0.303     | 0.186  |
| A011766_01 | 0.293     | 0.428     | 0.501  | 0.437  | 0.138     | 0.117  | 0.711     | 0.575  |
| A011767_01 | -0.132    | -0.204    | -0.372 | -0.11  | 0.087     | 0.147  | -0.07     | -0.021 |
| A011769_01 | -1.108    | -1.029    | -0.739 | -0.26  | -0.217    | -0.25  | -0.156    | -0.146 |
| A011770_01 | 0.033     | -0.163    | -0.265 | -0.221 | 0.251     | 0.22   | -0.124    | -0.216 |
| A011772_01 | -0.004    | -0.201    | -0.055 | -0.208 | 0.076     | -0.239 | 0.142     | -0.13  |
| A011773_01 | -0.093 NA |           | -0.173 | -0.562 | 0.256     | 0.321  | 0.233 NA  |        |
| A011774_01 | 0.077     | 0.038     | 0.358  | -0.159 | 0.083     | -0.023 | 0.067 NA  |        |
| A011775_01 | -0.136    | -0.212    | 0.02   | -0.005 | -0.012    | 0.116  | 0.08      | 0.087  |
| A011777_01 | -0.139    | 0.195     | 0.465  | 0.246  | -0.104    | -0.003 | 0.478     | 0.469  |
| A011778_01 | -0.174    | -0.017    | 0.165  | 0.081  | 0.23      | 0.222  | -0.019    | 0.123  |
| A011779_01 | -0.377    | -0.545    | 0.039  | 0.156  | 0.032     | -0.09  | 0.208     | 0.084  |
| A011780_01 | -0.007    | -0.254    | 0.066  | 0.048  | 0.075     | -0.149 | 0.179     | 0.076  |
| A011781_01 | -1.023    | -1.334    | -0.403 | -0.299 | -0.553    | -0.883 | 0.268     | 0.099  |
| A011782_01 | 0.693     | 0.61      | -0.144 | -0.043 | 0.02      | 0.093  | -0.036    | -0.187 |
| A011784_01 | -0.127    | -0.237    | 0.145  | 0.069  | 0.121     | 0.005  | 0.332     | 0.142  |
| A011788_01 | -0.535    | -0.683    | -0.134 | -0.139 | -0.373    | -0.539 | -0.105    | -0.135 |
| A011793_01 | -0.016    | -0.027    | -0.329 | 0.062  | 0.081     | 0.143  | 0.349     | 0.372  |
| A011795_01 | 0.678     | 0.696     | -0.395 | -0.286 | 0.581     | 0.538  | -0.014    | -0.008 |
| A011797_01 | 0.035     | 0.102     | 0.436  | 0.772  | 0.22      | 0.45   | 0.162 NA  |        |
| A011798_01 | -0.141    | -0.044    | -0.092 | -0.178 | 0.067     | 0.001  | 0.007     | 0.029  |
| A011800_01 | 0.057     | -0.075    | -0.153 | -0.391 | 0.206     | 0.139  | 0.082     | -0.123 |
| A011802_01 | -0.116    | -0.12     | 0.084  | -0.004 | -0.101    | -0.066 | -0.058    | -0.178 |
| A011806_01 | -0.471    | -0.286    | 0.271  | -0.356 | 0.024     | 0.231  | 0.142     | 0.035  |
| A011807_01 | -0.145    | -0.151    | 0.195  | 0.228  | -0.503    | -0.256 | -0.011    | 0.137  |
| A011808_01 | 0.517     | 0.636     | 0.224  | 0.432  | -0.097    | 0.063  | 0.057     | 0.185  |
| A011810_01 | 0.543     | 0.767     | 0.214  | 0.81   | 0.81      | 1.059  | 0.449     | 0.54   |
| A011811_01 | -3.379    | -4.087 NA |        | -3.545 | -2.576    | -3.193 | -1.893    | -1.657 |
| A011812_01 | -0.29     | -0.267    | 0.136  | -0.029 | -0.01     | 0.046  | -0.082    | -0.055 |
| A011813_01 | -0.149    | -0.142    | 0.047  | 0.089  | -0.043    | -0.041 | -0.256    | -0.062 |
| A011814_01 | 0.476     | 0.326     | -0.083 | 0.018  | 0.007     | 0.355  | 0.02      | -0.061 |

|            |           |          |        |           |           |        |           |        |
|------------|-----------|----------|--------|-----------|-----------|--------|-----------|--------|
| A011816_01 | 0.67      | 0.341    | 0.221  | -0.302    | 0.536     | 0.351  | 0.224     | -0.081 |
| A011817_01 | 0.198     | 0.264    | -0.079 | -0.017    | 0.575     | 0.566  | -0.048    | -0.12  |
| A011819_01 | -0.419    | -0.363   | 0.38   | 0.317     | -0.005    | 0.096  | -0.227    | -0.264 |
| A011820_01 | 0.236     | -0.143   | -0.448 | -0.572    | 0.21      | 0.205  | -0.395    | -0.303 |
| A011822_01 | 0.706     | 0.556    | 0.028  | -0.158    | -0.08     | -0.156 | -0.12     | -0.027 |
| A011825_01 | 0.102     | 0.003    | -0.084 | 0.028     | 0.129 NA  |        | 0.114     | 0.063  |
| A011826_01 | 0.541     | 0.548    | 0.338  | 0.056     | -0.03     | 0.037  | 0.248     | 0.092  |
| A011830_01 | -0.082    | -0.013   | -0.002 | -0.218    | 0.037     | 0.022  | 0.02      | -0.197 |
| A011831_01 | 0.138     | 0.126    | 0.277  | 0.211     | 0.004     | 0.209  | -0.057    | 0.031  |
| A011838_01 | 0.083     | -0.096   | 0.355  | 0.131     | 0.109     | 0.031  | 0.02 NA   |        |
| A011842_01 | 0.145     | -0.07    | 0.142  | 0.448     | 0.332     | 0.231  | 0.097     | 0.036  |
| A011843_01 | -0.122    | 0.144    | -0.225 | 0.091     | -0.288    | 0.044  | -0.247    | -0.014 |
| A011844_01 | 0.316     | 0.308    | 0.458  | 0.188     | 0.181     | 0.424  | 0.24      | 0.283  |
| A011852_01 | 0.068     | 0.215    | 0.17   | 0.198     | 0.2       | 0.101  | 0.147     | 0.108  |
| A011853_01 | -0.037    | -0.197   | 0.248  | 0.402     | -0.046    | -0.148 | 0.208     | 0.058  |
| A011854_01 | 0.162     | -0.038   | -0.153 | 0.075     | 0.121     | 0.203  | 0.472     | 0.375  |
| A011855_01 | 0.146     | 0.285    | 0.14   | 0.489     | 0.096     | -0.012 | -0.061    | -0.025 |
| A011856_01 | -0.057 NA |          | -0.174 | -0.092    | -0.099 NA |        | 0.005     | 0.13   |
| A011858_01 | 0.163     | -0.159   | 0.053  | 0.221     | -0.106    | -0.217 | 0.09      | -0.067 |
| A011859_01 | 0.175     | 0.049    | -0.038 | 0.114     | -0.071    | -0.088 | -0.134    | -0.177 |
| A011861_01 | -0.376    | -0.837   | -0.347 | 0.319     | -0.686    | -1.406 | -0.544    | -0.495 |
| A011862_01 | -0.56     | -0.648   | -0.14  | -0.566    | 0.201     | 0.085  | 0.07      | -0.007 |
| A011864_01 | -0.355    | -0.56 NA |        | -0.645    | 0.093 NA  |        | 0.46      | 0.215  |
| A011865_01 | -0.166    | -0.422   | 0.019  | -0.134    | 0.16      | -0.197 | -0.109    | -0.152 |
| A011866_01 | 0.038     | 0.09     | -0.255 | -0.079    | 0.164     | 0.143  | -0.097    | -0.156 |
| A011870_01 | 0.013     | 0.089    | -0.024 | -0.034    | 0.157     | 0.042  | -0.173    | 0.01   |
| A011872_01 | 0.08      | 0.111 NA |        | -0.833 NA | NA        |        | 0.027     | 0.066  |
| A011874_01 | -0.111    | -0.337   | 0.242  | -0.382    | 0.147     | -0.216 | 0.078     | -0.148 |
| A011875_01 | -0.193    | -0.161   | -1.006 | -0.571    | -0.112    | -0.13  | -0.352    | -0.355 |
| A011877_01 | -0.089    | -0.182   | -0.331 | 0.178     | 0.155     | 0.025  | -0.19     | -0.382 |
| A011881_01 | -0.174    | -0.275   | 0.07   | -0.068    | 0.218     | 0.011  | 0.062     | 0.024  |
| A011885_01 | -0.277    | -0.177   | 0.064  | -0.325    | -0.112    | -0.331 | -0.117 NA |        |
| A011887_01 | -0.48     | -0.775   | -0.386 | 0.219     | -0.136    | -0.334 | -0.186    | -0.155 |
| A011888_01 | -0.361    | -0.317   | 0.059  | -0.115    | 0.041     | -0.158 | 0.22      | 0.161  |
| A011889_01 | -0.592    | -0.931   | -0.415 | -0.716    | -0.679    | -0.651 | 0.003     | 0.093  |
| A011890_01 | 0.207     | 0.002    | -0.143 | 0.38      | -0.194    | 0.03   | -0.131    | -0.082 |
| A011895_01 | -0.019    | -0.146   | 0.176  | 0.116     | -0.093    | -0.291 | 0.024     | -0.027 |
| A011896_01 | -0.649    | -0.518   | -0.859 | -0.969    | -0.446    | -0.305 | -0.566    | -0.291 |
| A011901_01 | -0.242    | -0.273   | -0.086 | 0.312     | -0.094    | 0.003  | 0.019 NA  |        |
| A011903_01 | 0.04      | 0.003    | 0.316  | -0.029    | -0.008    | 0.01   | 0.233     | 0.065  |
| A011910_01 | -0.251    | -0.314   | -0.237 | 0.331     | -0.135    | -0.286 | -0.289    | -0.221 |
| A011912_01 | 0.889     | 0.957    | 0.332  | 0.012     | 0.39      | 0.809  | -0.409    | -0.253 |
| A011915_01 | -0.085    | -0.278   | 0.321  | 0.633     | -0.155    | -0.479 | -0.106 NA |        |
| A011921_01 | 0.318     | 0.164    | -0.229 | 0         | 0.141     | 0.003  | -0.134 NA |        |
| A011932_01 | 0.175     | 0.157    | 0.514  | 0.553     | 0.691     | 0.735  | -0.587    | -0.31  |
| A011935_01 | 0.37      | 0.289    | -0.23  | 0.132     | 0.188     | 0.174  | -0.121    | -0.245 |
| A011936_01 | 0.342     | 0.192    | -0.054 | 0.172 NA  | NA        |        | -0.182    | -0.16  |
| A011941_01 | -0.295    | 0.051    | 0.274  | 0.518     | -0.227    | -0.103 | -0.259    | -0.045 |
| A011942_01 | -0.08     | 0.259    | 0.367  | 0.122     | 0.22      | 0.299  | 0.261     | 0.332  |
| A011946_01 | 0.091     | 0.187    | 0.249  | -0.301    | -0.091    | 0.068  | 0.295     | 0.381  |
| A011949_01 | 0.483     | 0.416    | 0.039  | -0.32     | -0.046    | -0.083 | -0.06     | -0.001 |
| A011950_01 | -0.205    | -0.185   | 0.381  | 0.016     | 0.194     | 0.044  | 0.121     | 0.087  |
| A011957_01 | 0.529     | 0.622    | 0.637  | -0.173    | 0.447     | 0.502  | 0.074 NA  |        |
| A011963_01 | -0.826    | -0.891   | -0.263 | -1.057    | -0.333    | -0.559 | 0.479     | 0.555  |
| A011965_01 | -0.184    | 0.393 NA |        | 0.189     | -0.04     | 0.071  | -0.229    | 0.367  |
| A011966_01 | -0.203    | -0.229   | -0.164 | -0.196    | 0.1       | -0.056 | 0.026     | -0.162 |
| A011967_01 | 0.282     | 0.236    | 0.029  | 0.091     | -0.146    | 0.037  | -0.115    | -0.09  |
| A011976_01 | -0.449    | -0.892   | -0.59  | -0.778    | -0.248    | -0.504 | -0.444    | -0.435 |
| A011977_01 | 0.408     | 0.259    | 0.373  | 0.158     | 0.304     | 0.079  | -0.162    | -0.036 |
| A011978_01 | 0.251     | -0.131   | -0.01  | 0.05      | 0.13      | -0.29  | -0.294    | -0.344 |
| A011985_01 | 0.406     | 0.452    | 0.132  | -0.368    | 0.202     | 0.365  | 0.075     | 0.055  |
| A011986_01 | 0.257     | 0.304    | -0.152 | 0.408     | 0.009     | -0.097 | -0.298    | -0.26  |
| A011988_01 | 0.352     | 0.212    | 0.332  | 0.288     | 0.174     | -0.039 | 0.057     | -0.013 |
| A011992_01 | -0.158    | 0.021    | -0.057 | -0.096    | 0.06      | -0.08  | -0.04     | -0.049 |
| A011995_01 | 0.604     | 0.773    | 0.293  | 0.106     | 0.202     | 0.657  | 0.089     | 0.294  |
| A011996_01 | -0.235    | -0.18    | -0.279 | -0.472    | 0.392     | 0.284  | 0.012     | -0.082 |
| A012001_01 | -0.368    | -0.526   | 0.331  | 0.277     | 0.132     | 0.153  | 0.241     | 0.173  |
| A012008_01 | -0.1      | -0.145   | 0.364  | -0.069    | 0.028     | -0.06  | 0.013     | 0.002  |

|            |           |        |          |           |           |        |           |        |
|------------|-----------|--------|----------|-----------|-----------|--------|-----------|--------|
| A012009_01 | -0.115    | -0.169 | -0.138   | 0.152     | 0.098     | -0.239 | 0.079     | -0.155 |
| A012010_01 | -0.013    | 0.121  | -0.004   | -0.207    | 0.01      | 0.161  | -0.012    | 0.196  |
| A012011_01 | 0.382     | 0.335  | 0.264    | 0.229     | 0.233     | 0.187  | -0.011    | -0.103 |
| A012012_01 | 0.295     | 0.271  | 0.056    | -0.052    | 0.416     | 0.342  | 0.146     | 0.053  |
| A012013_01 | 0.878     | 0.598  | 0.226    | 0.391 NA  | NA        |        | 0.059     | -0.159 |
| A012014_01 | 0.158     | 0.041  | 0.432    | -0.036    | 0.346     | 0.457  | 0.046     | -0.031 |
| A012021_01 | -0.332    | -0.247 | 0.038    | -0.051    | -0.276    | -0.399 | -0.1      | -0.103 |
| A012028_01 | 0.306     | 0.235  | 0.006    | 0.539     | 0.032     | -0.125 | 0.589     | 0.428  |
| A012030_01 | -0.066    | -0.125 | -0.724   | 0.071     | -0.057    | -0.11  | -0.204    | 0.088  |
| A012031_01 | 0.187     | -0.078 | 0.163    | -0.304 NA | NA        |        | 0.736     | 0.419  |
| A012033_01 | 0.076     | -0.069 | 0.079    | -0.668    | 0.199     | -0.134 | -0.067    | -0.302 |
| A012039_01 | 0.699     | 0.411  | -0.012   | 0.517     | -0.08     | -0.259 | -0.128    | -0.259 |
| A012043_01 | 0.409     | 0.19   | 0.079    | 0.567     | 0.031     | -0.088 | -0.091    | -0.091 |
| A012046_01 | -0.047 NA |        | 0.093    | -0.053    | -0.041    | -0.003 | 0.004     | -0.03  |
| A012049_01 | -0.603    | -0.94  | -0.671   | -1.267    | -0.354    | -0.446 | -0.938    | -0.648 |
| A012050_01 | 0.05      | -0.271 | 0.027    | 0.257     | -0.016    | -0.321 | 0.002     | -0.035 |
| A012060_01 | -0.155    | -0.276 | 0.031    | 0.304     | -0.009    | -0.059 | 0.13      | -0.131 |
| A012066_01 | 0.222     | 0.279  | 0.095    | -0.305    | 0.139     | 0.072  | -0.042    | -0.039 |
| A012068_01 | 0.195     | 0.156  | -0.318   | 0.042     | -0.105 NA |        | -0.017 NA |        |
| A012069_01 | -0.114    | -0.219 | -0.279   | -0.489    | 0.222     | 0.031  | -0.01 NA  |        |
| A012075_01 | 0.279     | 0.162  | -0.168   | -0.219    | -0.001    | 0.051  | 0.179     | 0.064  |
| A012076_01 | 0.161     | 0.088  | -0.238   | -0.351    | 0.305     | 0.167  | 0.346     | 0.132  |
| A012078_01 | -0.025    | 0.022  | -0.02    | -0.259    | 0.127     | 0.113  | 0.181     | 0.05   |
| A012079_01 | 0.157     | 0.164  | 0.02     | -0.316    | 0.188     | 0.103  | -0.022    | -0.032 |
| A012080_01 | 0.145     | 0.223  | 0.281    | 1.174     | 0.241     | 0.146  | -0.02     | -0.013 |
| A012084_01 | 0.179     | 0.054  | 0.262    | 0.238     | 0.091     | -0.22  | -0.229    | -0.249 |
| A012085_01 | -0.122    | -0.316 | 0.168    | -0.681    | 0.123     | -0.06  | 0.141     | -0.123 |
| A012086_01 | 0.19      | 0.229  | 0.113    | 0.399     | 0.143     | 0.268  | -0.078    | -0.186 |
| A012088_01 | -0.314    | -0.317 | -0.006   | 0.18      | -0.211    | -0.337 | -0.144    | -0.077 |
| A012091_01 | -1.959    | -2.134 | -1.264   | -1.603    | -0.556    | -0.745 | -0.386    | -0.167 |
| A012092_01 | 0.352     | 0.387  | 0.14     | 0.24      | -0.08     | -0.08  | -0.104    | -0.027 |
| A012093_01 | -0.359    | -0.452 | -0.456   | 0.161     | -0.042    | -0.075 | -0.445    | -0.111 |
| A012098_01 | 0.067     | -0.013 | 0.546    | -0.096    | 0.413     | 0.04   | 0.087     | 0.006  |
| A012104_01 | -0.329    | -0.434 | -1.283   | -0.708    | -0.011    | -0.2   | -0.473    | -0.316 |
| A012108_01 | 0.061     | -0.084 | -0.384   | 0.116     | -0.031    | -0.054 | 0.006     | 0.008  |
| A012113_01 | -0.89     | -0.678 | -0.075   | -0.553    | -0.392    | -0.219 | -0.188    | -0.032 |
| A012115_01 | 0.07      | -0.013 | -0.257   | 0.111     | -0.356    | -0.499 | -0.392    | -0.342 |
| A012116_01 | -1.27     | -1.625 | -0.852   | -0.92     | -1.087    | -1.767 | -1.082    | -1.011 |
| A012117_01 | -0.508    | -0.458 | 0.014    | 0.055     | -0.293    | -0.315 | -0.034    | -0.109 |
| A012119_01 | -1.027    | -1.282 | -1.129   | -1.229    | -0.806    | -0.841 | -0.654    | -0.567 |
| A012120_01 | 0.193     | 0.251  | 0.169    | 0.169     | 0.068     | 0.221  | 0.308     | 0.192  |
| A012123_01 | -0.103    | -0.095 | -0.147   | -0.123    | 0.378     | 0.305  | 0.37      | 0.149  |
| A012125_01 | 0.426     | 0.231  | 0.294    | 0.202 NA  |           | 0.205  | 0.089     | -0.069 |
| A012126_01 | 0.272     | 0.026  | -0.375   | -0.298    | -0.001    | -0.175 | -0.154    | -0.42  |
| A012127_01 | 0.38      | 0.323  | 0.211    | -0.098    | 0.207     | 0.3    | 0.055     | 0.001  |
| A012129_01 | -0.149    | -0.216 | -0.063   | -0.054    | 0.148     | -0.079 | 0.257     | 0.077  |
| A012130_01 | -0.248    | -0.334 | -0.37    | 0.448     | -0.158    | -0.231 | -0.096    | -0.066 |
| A012131_01 | 0.163     | 0.02   | -0.234   | 0.389     | -0.057    | -0.12  | -0.33     | -0.222 |
| A012132_01 | 0.013     | -0.095 | 0.209 NA |           | -0.013    | -0.308 | 0.076     | -0.247 |
| A012134_01 | 0.212     | 0.038  | -0.01    | -0.379    | 0.287     | 0.222  | 0.222     | 0.134  |
| A012141_01 | 0.158     | 0.097  | 0.068    | -0.341    | 0.058     | -0.087 | 0.219     | 0.173  |
| A012144_01 | 0.19      | 0.086  | -0.184   | -0.349    | 0.177     | 0.139  | -0.006    | -0.145 |
| A012145_01 | 0.355     | 0.324  | 0.592    | 0.246     | 0.207     | 0.23   | 0.239     | 0.156  |
| A012149_01 | 0.231     | 0.203  | 0.467    | 0.258     | 0.126     | -0.043 | -0.182    | -0.122 |
| A012150_01 | 0.258     | 0.412  | -0.103   | 0.136     | -0.188    | -0.214 | -0.049    | 0.006  |
| A012155_01 | 0.724     | 0.541  | -0.001   | 0.331     | 0.033     | 0.459  | 0.332     | 0.122  |
| A012158_01 | 0.166     | 0.261  | 0.163    | -0.305    | 0.071     | 0.129  | 0.12      | 0.089  |
| A012159_01 | 0.682     | 0.482  | 0.841    | 0.715     | 0.919     | 1.058  | -0.227    | -0.243 |
| A012163_01 | -0.966    | -1.111 | -0.291   | -0.121    | -0.482    | -0.809 | -0.218 NA |        |
| A012167_01 | -0.162    | -0.012 | -0.163   | 0.066     | -0.045    | -0.245 | -0.062    | -0.161 |
| A012168_01 | -0.104    | -0.051 | 0.007    | -0.148    | 0.209     | 0.04   | -0.09     | -0.053 |
| A012171_01 | 0.037     | -0.056 | 0.107    | 0.396     | 0.239     | -0.147 | -0.25 NA  |        |
| A012174_01 | 0.146     | -0.021 | -0.012   | 0.517     | 0.233     | 0.185  | -0.005    | -0.223 |
| A012175_01 | -0.329    | -0.313 | -0.307   | -0.058    | -0.078    | 0      | -0.234    | -0.191 |
| A012176_01 | -0.598    | -0.485 | -0.528   | -0.251    | -0.121    | -0.018 | -0.177    | -0.165 |
| A012178_01 | 0.239     | 0.322  | -0.02    | -0.571    | 0.523     | 0.5    | 0.013     | -0.016 |
| A012184_01 | -0.394    | -0.169 | 0.382    | 0.429     | -0.117    | -0.22  | -0.19     | -0.209 |
| A012185_01 | 0.134     | -0.122 | 0.213    | -0.077    | 0.315     | 0.152  | 0.418     | 0.207  |

|            |          |           |           |           |           |        |           |        |
|------------|----------|-----------|-----------|-----------|-----------|--------|-----------|--------|
| A012186_01 | -0.301   | -0.197    | -0.069    | -0.477    | 0.038     | -0.099 | -0.005    | 0.216  |
| A012193_01 | -0.058   | -0.02     | -0.225    | 0.035     | 0.181     | 0      | -0.18     | -0.115 |
| A012200_01 | -0.577   | -0.569    | -0.284    | 0.169     | -0.468    | -0.755 | -0.158    | -0.006 |
| A012203_01 | 0.275    | 0.068     | 0.229     | 0.246     | 0         | -0.246 | 0.038     | -0.081 |
| A012207_01 | 0.381    | 0.296     | 0.179     | 0.011     | 0.47      | 0.549  | 0.408     | -0.031 |
| A012210_01 | 0.223    | 0.053     | -0.041    | -0.286    | 0.211     | -0.028 | 0.075     | -0.095 |
| A012213_01 | 0.036    | 0.05      | -0.075    | -0.087    | 0.016     | -0.088 | 0.045     | 0.218  |
| A012214_01 | -0.333   | -0.2      | -0.377    | -0.354    | -0.014    | 0.114  | 0.053     | 0.076  |
| A012215_01 | -0.053   | -0.183    | -0.282    | -0.352    | 0.206     | -0.09  | 0.149     | 0.039  |
| A012218_01 | 0.358    | 0.398     | 0.321     | -0.217    | 0.444     | 0.298  | 0.086     | 0.111  |
| A012219_01 | -0.204   | -0.216    | -0.348    | 0.164     | -0.108    | -0.181 | -0.179 NA |        |
| A012221_01 | 0.399    | 0.364     | 0.011     | 0.355     | -0.048    | 0.028  | -0.064    | -0.139 |
| A012223_01 | 0.222    | 0.34      | -0.043    | 0.099     | -0.156 NA |        | 0.033     | 0.1    |
| A012229_01 | 0.898    | 0.929     | 0.578     | 0.338     | -0.077    | 0.198  | 0.155     | 0.055  |
| A012231_01 | 0.051 NA | NA        | NA        |           | 0.014     | -0.15  | -0.343 NA |        |
| A012234_01 | -0.126   | -0.148    | -0.087    | -0.068    | 0.233     | 0.056  | 0.048     | -0.077 |
| A012237_01 | 0.206    | -0.073    | -0.189    | 0.44      | -0.099    | -0.204 | -0.421 NA |        |
| A012239_01 | -0.127   | -0.282    | 0.068     | 0.477     | -0.213 NA |        | -0.234    | -0.119 |
| A012247_01 | 0.249    | 0.271     | -0.358    | 0.258     | -0.174    | 0.053  | -0.087    | -0.022 |
| A012251_01 | -0.592   | -0.528    | -0.296    | 0.061     | -0.388    | -0.775 | -0.292    | -0.194 |
| A012254_01 | 0        | 0.114     | 0.26      | -0.309    | -0.163    | -0.084 | -0.052    | 0.044  |
| A012256_01 | -0.535   | -0.373    | 0.009     | -0.033    | 0.167     | 0.208  | -1.229    | -0.899 |
| A012257_01 | -2.412   | -2.628    | -2.845 NA |           | -2.171    | -2.803 | -1.384    | -1.095 |
| A012259_01 | 0.464    | 0.567     | 0.889     | 0.813     | -0.228    | -0.553 | 0.391     | 0.484  |
| A012264_01 | -0.195   | -0.368 NA |           | -0.088    | -0.314    | -0.671 | -0.242    | -0.15  |
| A012272_01 | -0.319   | 0.074     | 0.074     | 0.139     | -0.105    | 0.028  | -0.123    | 0.044  |
| A012275_01 | -0.616   | -0.581    | -0.609    | -0.723    | -0.04     | -0.182 | -0.007    | -0.003 |
| A012276_01 | 0.113    | 0.121     | 0.226     | 0.031     | 0.069     | -0.067 | -0.119    | -0.131 |
| A012277_01 | 0.741    | 0.813     | 0.533     | 0.445     | 0.649     | 0.775  | -0.089    | -0.089 |
| A012283_01 | -0.802   | -0.445    | -0.192    | -0.12     | 0.097     | 0.017  | -0.228 NA |        |
| A012291_01 | -0.261   | -0.492    | -0.054    | -0.214    | 0.209     | -0.046 | -0.016    | -0.214 |
| A012293_01 | 0.16     | 0.128     | -0.053    | 0.333     | 0.136     | 0.083  | -0.406    | -0.248 |
| A012294_01 | -0.283   | -0.244    | 0.322     | 0.284     | 0.269     | 0.21   | -0.048    | -0.08  |
| A012295_01 | -0.022   | -0.123    | 0.142     | -0.086    | 0.017     | -0.168 | 0.07      | -0.102 |
| A012299_01 | -0.319   | -0.278    | 0.197     | 0.082     | -0.084    | -0.007 | 0.126     | 0.126  |
| A012309_01 | 0.056    | 0.007     | 0.052     | 0.16      | -0.17     | -0.098 | -0.072    | -0.083 |
| A012311_01 | -0.01    | -0.193    | -0.124    | -0.134    | 0.085     | -0.185 | -0.185    | -0.078 |
| A012313_01 | -0.221   | -0.385    | 0.17      | -0.196    | 0.008     | -0.364 | 0.21      | -0.071 |
| A012321_01 | 0.398 NA |           | -0.06     | -0.531 NA | NA        |        | 0.24      | 0.15   |
| A012323_01 | -0.265   | -0.276    | -0.101    | 0.069     | 0.039     | -0.088 | 0.038     | -0.038 |
| A012324_01 | 0.317    | 0.278     | -0.384    | -0.031    | -0.278    | -0.034 | -0.597    | -0.494 |
| A012325_01 | 0.579    | 0.267     | -0.118    | -0.513    | 0.037     | 0.336  | 0.089     | -0.008 |
| A012326_01 | -0.218   | -0.242    | -0.072    | 0.072     | -0.051    | -0.057 | 0.017     | -0.095 |
| A012331_01 | 0.8      | 0.648     | 0.638     | 0.867     | 0.112     | -0.245 | 0.455     | 0.482  |
| A012332_01 | 0.639    | 0.682     | -0.344    | -0.17     | 0.36      | 0.144  | -0.025    | -0.206 |
| A012334_01 | 0.381    | 0.422     | -0.365    | 0.137     | 0.052     | 0.065  | -0.049    | -0.023 |
| A012336_01 | 0.536    | 0.612     | 1.006     | 0.707     | 0.414     | 0.295  | 0.003     | 0.059  |
| A012337_01 | 0.068    | 0.043     | -0.081    | 0.299     | 0.079     | 0.118  | -0.337    | 0.045  |
| A012340_01 | 0.032    | 0.115     | -0.29     | -0.202    | 0.066     | -0.026 | 0.174     | -0.066 |
| A012341_01 | 0.015    | 0.053 NA  |           | -0.214    | -0.045    | -0.198 | 0.023     | -0.076 |
| A012351_01 | 0.177    | 0.058     | -0.428    | -0.018    | 0.216     | 0.082  | -0.374    | -0.302 |
| A012353_01 | 0.281    | 0.272     | -0.075    | -0.268    | 0.013     | 0.083  | 0.005     | -0.04  |
| A012354_01 | -0.143   | -0.26     | -0.104    | -0.402    | 0.04      | 0.085  | 0.37      | 0.272  |
| A012357_01 | 0.102    | 0.115     | 0.263     | 0.242     | 0.137     | -0.052 | -0.103    | -0.175 |
| A012360_01 | -0.221   | -0.379    | -0.043    | -0.013    | 0.184     | 0.133  | 0.304     | 0.185  |
| A012364_01 | -0.169   | 0.333     | 0.357     | 0.005     | -0.121    | 0.237  | -0.239    | 0.232  |
| A012366_01 | 0.086 NA |           | -0.435    | 0.227     | 0.074 NA  |        | 0.068 NA  |        |
| A012367_01 | 0.048    | 0.3       | 0.003     | -0.289    | 0.072     | 0.116  | 0.142     | 0.303  |
| A012369_01 | 1.544    | 1.294     | 1.259     | 0.943     | 0.004     | -0.089 | 0.379     | 0.264  |
| A012370_01 | 0.001    | -0.165    | 0.16      | -0.243    | -0.103    | -0.099 | -0.05     | -0.211 |
| A012371_01 | 0.229    | 0.435     | 0.501     | 0.502     | -0.205    | 0.002  | 0.059     | 0.095  |
| A012372_01 | 0.493    | 0.356     | 0.403     | 0.261     | 0.477     | 0.791  | 0.727     | 0.431  |
| A012373_01 | -0.391   | -0.26     | 0.024     | -0.289    | -0.255    | -0.121 | 0.097     | 0.082  |
| A012375_01 | -0.04    | -0.041    | 0.04      | -0.553    | 0.081     | -0.022 | -0.11     | -0.017 |
| A012377_01 | 0.272    | 0.176     | -0.016 NA |           | 0.27      | 0.174  | -0.12 NA  |        |
| A012379_01 | 0.263    | 0.012     | -0.166    | -0.293    | 0.236     | 0.036  | 0.047     | -0.094 |
| A012381_01 | 0.233    | 0.148     | 0.307     | 0.234     | 0.213     | 0.142  | 0.261     | 0.063  |
| A012382_01 | 0.439    | 0.16      | -0.151    | -0.088    | 0.135     | 0.15   | -0.361    | -0.292 |

|            |           |           |        |           |           |        |           |        |
|------------|-----------|-----------|--------|-----------|-----------|--------|-----------|--------|
| A012385_01 | 0.125     | 0.264     | 0.212  | 0.449     | -0.094    | -0.086 | 0.07      | -0.082 |
| A012386_01 | -0.474    | -0.674    | -0.511 | -0.57     | 0.121     | -0.124 | 0.314     | 0.226  |
| A012388_01 | -0.199    | -0.216    | -0.156 | -0.232    | -0.364    | -0.33  | -0.193    | -0.086 |
| A012390_01 | -0.342    | -0.362    | -0.222 | 0.015     | -0.097    | -0.479 | -0.278    | -0.117 |
| A012393_01 | -0.022    | 0.073     | -0.131 | 0.079     | -0.079    | -0.097 | -0.044    | 0.142  |
| A012396_01 | 0.833     | 0.656     | 0.492  | 0.497     | 0.675     | 0.575  | 0.134     | 0.053  |
| A012397_01 | 0.879     | 0.859     | -0.23  | -0.776    | 0.24      | 0.582  | 0.069     | 0.109  |
| A012398_01 | -0.541    | -0.443    | -0.109 | -0.474    | -0.217    | -0.349 | -0.307    | -0.154 |
| A012400_01 | 0.426     | 0.262     | 0.392  | -0.05     | 0.021     | 0.096  | 0.305     | 0.224  |
| A012402_01 | -0.009    | -0.007    | 0.236  | -0.241    | 0.022     | 0.074  | 0.084     | 0.083  |
| A012404_01 | 0.562     | 0.142     | 0.124  | -0.676 NA |           | 0.063  | 0.124     | -0.012 |
| A012407_01 | -0.405    | -0.246    | -0.208 | -0.18     | -0.083    | -0.103 | 0.181     | 0.005  |
| A012410_01 | 0.573     | 0.39      | 0.03   | 0.354     | -0.009    | 0.293  | -0.163    | -0.139 |
| A012415_01 | -1.544    | -2.118 NA |        | -2.063    | -0.947    | -1.606 | -0.896    | -0.637 |
| A012421_01 | 0.054     | -0.223    | 0.038  | -0.221    | 0.183     | 0.199  | -0.094    | -0.158 |
| A012422_01 | 0.469     | 0.751     | 0.495  | -0.179    | -0.109    | 0.305  | 0.023     | 0.241  |
| A012423_01 | 0.156     | -0.031    | -0.019 | -0.394    | 0.326     | 0.178  | 0.145     | -0.064 |
| A012425_01 | 0.104     | 0.012     | -0.527 | -0.686    | 0.071     | -0.075 | -0.199    | -0.389 |
| A012428_01 | -0.374    | -0.375    | -0.08  | 0.359     | -0.137    | -0.234 | -0.158    | -0.208 |
| A012429_01 | -0.026    | -0.189    | 0.038  | 1.074     | -1.378    | -2.243 | -1.297    | -1.077 |
| A012430_01 | 0.553     | 0.965     | 0.694  | 0.311     | 0.867     | 1.191  | 0.019     | 0.144  |
| A012440_01 | -0.166    | -0.38     | -0.418 | -0.291 NA | NA        |        | -0.222    | -0.264 |
| A012442_01 | -1.008    | -1.156    | -0.012 | -0.195    | -0.739    | -0.698 | 0.139     | 0.179  |
| A012445_01 | -0.12     | -0.142    | 0.028  | 0.065     | 0.131     | 0.292  | -0.069    | -0.079 |
| A012449_01 | 0.764     | 0.715     | -0.005 | -0.023    | -0.026    | 0.256  | 0.073     | 0.159  |
| A012451_01 | 0.034     | -0.142    | 0.037  | -0.066    | 0.269     | -0.155 | 0.104     | -0.107 |
| A012454_01 | 0.201     | 0.152     | 0.285  | 0.577     | -0.16     | -0.534 | -0.086    | -0.239 |
| A012458_01 | -0.813    | -0.72     | 0.029  | -0.181    | -0.4      | -0.482 | -0.38     | -0.079 |
| A012460_01 | 0.27      | -0.001    | 0.021  | 0.213     | 0.031     | -0.119 | 0.246     | 0.014  |
| A012464_01 | -0.197    | -0.332    | -0.028 | -0.218    | -0.194    | -0.431 | 0.085     | 0.106  |
| A012466_01 | 0.446     | 0.297     | 0.163  | -0.074    | 0.248 NA  |        | 0.208     | 0.047  |
| A012467_01 | -1.135    | -1.676    | -1.851 | -1.871    | -0.75     | -0.999 | -0.818    | -0.676 |
| A012468_01 | -0.325    | -0.419    | 0.002  | -0.288    | -0.255    | -0.32  | 0.276     | 0.203  |
| A012469_01 | -0.062    | -0.005    | -0.181 | -0.128    | 0.196     | -0.132 | 0.211     | -0.021 |
| A012473_01 | -0.069 NA |           | 0.111  | -0.056    | -0.004 NA |        | -0.03     | 0.079  |
| A012479_01 | 0.137     | 0.238     | -0.53  | 0.184     | 0.227     | 0.064  | -0.247 NA |        |
| A012482_01 | -0.108    | -0.076    | 0.073  | 0.3       | -0.111    | -0.139 | -0.421    | -0.187 |
| A012487_01 | -0.634    | -0.907    | -0.195 | -0.36     | -0.459    | -0.861 | -0.044    | -0.035 |
| A012493_01 | 0.015     | 0.279     | 0.432  | 0.354     | -0.021    | -0.195 | -0.341    | -0.201 |
| A012499_01 | 0.14      | -0.091    | 0.063  | 0.046     | 0.125     | -0.107 | 0.072     | -0.163 |
| A012501_01 | 0.17      | -0.045    | 0.013  | -0.033    | 0.052     | 0.012  | 0.206     | 0.058  |
| A012502_01 | -0.052    | -0.016    | 0.067  | -0.02     | 0.232     | 0.173  | -0.068    | -0.127 |
| A012504_01 | -0.348    | -0.376    | 0.062  | -0.3      | 0.023     | -0.265 | -0.033 NA |        |
| A012513_01 | -0.141    | -0.176    | -0.556 | -0.099    | -0.075    | -0.012 | -0.194    | -0.155 |
| A012518_01 | -0.485    | -0.204    | -0.356 | -0.619    | -0.138    | -0.005 | -0.113    | -0.165 |
| A012526_01 | -0.474    | -0.385    | -0.461 | -0.389    | 0.046     | -0.279 | -0.106 NA |        |
| A012527_01 | 0.517     | 0.277     | 0.111  | 0.134     | 0.072 NA  |        | -0.15     | -0.173 |
| A012532_01 | 0.186     | 0.388     | 0.165  | -0.037    | -0.163    | 0.125  | 0.059     | 0.053  |
| A012533_01 | 0.196     | 0.133     | -0.14  | -0.237    | 0.363     | 0.153  | -0.049    | -0.122 |
| A012537_01 | 0.246     | 0.195     | 0.111  | -0.1      | -0.097    | -0.077 | -0.147    | -0.039 |
| A012543_01 | -0.517    | -0.486    | -0.446 | -0.297    | -0.122    | -0.332 | -0.629 NA |        |
| A012557_01 | 0.291     | 0.171     | -0.064 | -0.456    | 0.168     | 0.295  | -0.024 NA |        |
| A012562_01 | -0.57     | -0.648    | -0.06  | 0.285     | 0.075     | -0.046 | -0.271 NA |        |
| A012563_01 | -0.371    | -0.201    | -0.209 | -0.502    | -0.028    | -0.356 | -0.035    | 0.229  |
| A012565_01 | -0.386    | -0.208    | 0.146  | -0.104    | 0.162     | 0.063  | -0.06     | 0.061  |
| A012566_01 | -0.057    | -0.074    | 0.067  | 0.116     | 0.005     | -0.117 | -0.008    | 0.059  |
| A012567_01 | 0.094     | 0.023     | -0.06  | -0.253    | 0.178     | 0.177  | 0.117     | 0.087  |
| A012572_01 | -0.085    | 0.128     | -0.214 | -0.59     | -0.194    | 0.056  | -0.328    | -0.034 |
| A012577_01 | -0.494    | -0.573 NA | NA     |           | -0.378    | -0.542 | -0.407    | -0.196 |
| A012578_01 | 0.102     | 0.005     | 0.252  | 0.385     | -0.477    | -0.569 | -0.122    | -0.018 |
| A012579_01 | -0.845 NA |           | -0.407 | -0.6      | -0.095 NA |        | 0.291     | 0.256  |
| A012580_01 | -0.037    | 0.172     | -0.056 | 0.094     | -0.02     | -0.043 | -0.222    | 0.23   |
| A012581_01 | 0.565     | 0.413     | -0.013 | 0.702     | -0.436    | -0.744 | -1.152 NA |        |
| A012585_01 | 0.431     | 0.307     | 0.656  | 0.548     | 0.81      | 0.595  | -0.018    | 0.02   |
| A012587_01 | -0.362    | -0.302    | -0.718 | 0.104     | -0.067    | -0.305 | -0.234    | -0.238 |
| A012590_01 | 0.189     | 0.118     | -0.072 | 0.171     | -0.051    | 0.043  | -0.255    | -0.085 |
| A012591_01 | -0.363    | -0.149    | 0.283  | 0.456     | -0.05 NA  |        | -0.045    | -0.03  |
| A012594_01 | -0.225    | -0.245 NA |        | 0.153     | -0.033    | -0.231 | -0.05     | -0.168 |

|            |        |        |        |        |        |        |        |        |
|------------|--------|--------|--------|--------|--------|--------|--------|--------|
| A012595_01 | -0.762 | -0.815 | NA     | -0.198 | -0.097 | -0.234 | -0.524 | NA     |
| A012597_01 | -0.371 | -0.109 | 0.147  | -0.072 | -0.185 | -0.057 | -0.22  | -0.138 |
| A012604_01 | 0.184  | 0.07   | 0.151  | 0.423  | -0.038 | -0.233 | 0.11   | -0.053 |
| A012607_01 | -0.482 | -0.679 | -0.285 | -0.632 | -0.36  | -0.679 | 0.162  | 0.065  |
| A012618_01 | -0.269 | -0.473 | -0.057 | -0.001 | 0.052  | -0.007 | -0.111 | -0.185 |
| A012621_01 | -0.444 | -0.722 | 0.071  | -0.195 | -0.31  | -0.646 | -0.027 | -0.291 |
| A012623_01 | -0.111 | -0.03  | 0.135  | -0.185 | -0.07  | -0.023 | -0.046 | -0.017 |
| A012625_01 | -0.076 | -0.099 | -0.233 | 0.117  | -0.098 | -0.097 | -0.09  | 0.019  |
| A012626_01 | -0.848 | -0.991 | -1.02  | -0.814 | -0.13  | -0.342 | -0.267 | -0.148 |
| A012627_01 | -0.076 | -0.405 | -0.033 | -0.255 | 0.211  | -0.035 | 0.044  | -0.084 |
| A012628_01 | -1.032 | NA     | NA     | NA     | -0.83  | NA     | NA     | NA     |
| A012631_01 | 0.087  | 0.028  | NA     | 0.3    | 0.057  | NA     | -0.609 | -0.452 |
| A012633_01 | 0.563  | 0.439  | 0.068  | 0.143  | 0.438  | 0.351  | 0.24   | 0.078  |
| A012637_01 | -0.404 | -0.361 | 0.237  | 0.103  | -0.047 | -0.025 | 0.016  | 0.162  |
| A012640_01 | 0.095  | 0.214  | -0.191 | NA     | -0.106 | NA     | NA     | NA     |
| A012641_01 | 0.061  | 0.143  | 0.373  | 0.164  | -0.032 | -0.228 | 0.119  | 0.055  |
| A012646_01 | -0.106 | 0.059  | 0.231  | -0.09  | 0.028  | 0.206  | 0.676  | 0.683  |
| A012647_01 | 0.332  | NA     | 0.587  | 0.321  | NA     | NA     | 0.426  | 0.329  |
| A012648_01 | -0.452 | -0.326 | -0.565 | -0.24  | -0.232 | -0.25  | -0.207 | 0.005  |
| A012649_01 | -0.602 | -0.592 | 0.366  | 0.154  | -0.192 | -0.353 | 0.34   | 0.294  |
| A012650_01 | 0.187  | -0.187 | 0.16   | 0.116  | 0.101  | 0.136  | -0.031 | 0.102  |
| A012651_01 | -0.088 | -0.083 | -0.367 | -0.526 | -0.322 | -0.18  | -0.157 | -0.111 |
| A012653_01 | -0.119 | -0.206 | -0.376 | -0.354 | 0.014  | -0.037 | 0.071  | -0.047 |
| A012654_01 | 0.234  | 0.055  | -0.025 | -0.039 | -0.123 | -0.565 | -0.173 | -0.125 |
| A012655_01 | -0.017 | 0.155  | 0.346  | 0.174  | 0.479  | 0.673  | 0.199  | 0.277  |
| A012657_01 | -0.253 | -0.451 | -0.547 | 0.2    | -0.03  | -0.239 | -0.271 | NA     |
| A012660_01 | 0.007  | -0.034 | -0.066 | 0.5    | -0.214 | NA     | -0.121 | -0.047 |
| A012664_01 | -0.06  | -0.089 | -0.345 | 0.069  | -0.192 | -0.105 | -0.069 | 0.03   |
| A012665_01 | -0.125 | -0.271 | -0.459 | -0.207 | 0.14   | NA     | -0.17  | -0.311 |
| A012672_01 | -0.525 | -0.421 | -0.433 | -0.474 | -0.251 | -0.038 | -0.091 | 0.08   |
| A012678_01 | -2.229 | -2.755 | -2.73  | -2.764 | -1.523 | -1.863 | -1.408 | -1.093 |
| A012680_01 | 0.594  | 0.598  | 0.332  | 0.414  | NA     | NA     | 0.119  | 0.147  |
| A012685_01 | -0.41  | -0.446 | -0.213 | -0.083 | 0.14   | 0.125  | 0.173  | 0.043  |
| A012694_01 | 0.373  | 0.312  | -0.025 | -0.567 | 0.197  | 0.299  | -0.22  | -0.186 |
| A012695_01 | -0.024 | -0.126 | -0.026 | 0.055  | 0.323  | 0.336  | 0.303  | 0.064  |
| A012696_01 | 0.562  | 0.462  | 0.171  | 0.621  | 0.282  | 0.153  | -0.235 | -0.108 |
| A012697_01 | 0.006  | 0.005  | -0.264 | 0.079  | 0.088  | 0.093  | -0.082 | -0.06  |
| A012700_01 | 0.226  | 0.091  | 0.131  | 0.274  | -0.084 | -0.532 | 0.121  | 0.073  |
| A012704_01 | 0.248  | 0.161  | -0.012 | -0.305 | 0.286  | 0.393  | -0.03  | -0.052 |
| A012705_01 | 0.406  | 0.433  | 0.004  | 0.044  | 0.238  | 0.226  | -0.053 | -0.076 |
| A012706_01 | -0.071 | -0.185 | 0.076  | 0.085  | 0.211  | -0.214 | 0.04   | -0.08  |
| A012707_01 | 0.36   | 0.09   | -0.428 | -0.201 | 0.047  | -0.143 | -0.446 | -0.386 |
| A012710_01 | 0.12   | 0.225  | 0.206  | 0.481  | 0.127  | 0.156  | -0.143 | -0.048 |
| A012712_01 | 0.779  | 0.82   | 0.199  | -0.514 | -0.071 | NA     | -0.197 | -0.207 |
| A012714_01 | 0.006  | -0.189 | 0.195  | 0.121  | 0.101  | 0.315  | 0.11   | 0.173  |
| A012715_01 | -0.206 | NA     | 0.035  | 0.102  | 0.069  | NA     | 0.268  | 0.114  |
| A012722_01 | 0.023  | -0.417 | -0.141 | -0.336 | 0.051  | -0.421 | -0.191 | -0.274 |
| A012723_01 | 0.297  | -0.141 | -0.048 | -0.118 | 0.114  | -0.071 | -0.02  | -0.037 |
| A012724_01 | -0.364 | -0.963 | -0.402 | -0.432 | 0.014  | -0.455 | 0.229  | NA     |
| A012726_01 | 0.237  | 0.029  | 0.278  | -0.049 | 0.172  | -0.063 | 0.216  | 0.012  |
| A012728_01 | 0.007  | -0.072 | -0.004 | 0.029  | 0.196  | 0.294  | 0.083  | 0.038  |
| A012730_01 | 0.355  | 0.533  | 0.378  | -0.026 | 0.212  | 0.341  | 0.496  | 0.489  |
| A012732_01 | -0.235 | -0.05  | 0.053  | 0.004  | -0.029 | 0.095  | -0.438 | -0.23  |
| A012738_01 | 0.159  | 0.183  | 0.168  | -0.406 | 0.254  | 0.141  | 0.154  | 0.132  |
| A012739_01 | 0.972  | 1.188  | 0.46   | -0.174 | 0.194  | 0.389  | 0.111  | 0.12   |
| A012741_01 | -0.53  | -0.438 | 0.17   | -0.452 | 0.167  | 0.064  | -0.027 | -0.053 |
| A012745_01 | 0.168  | 0.13   | -0.121 | -0.453 | 0.14   | 0.057  | -0.075 | -0.035 |
| A012747_01 | 0.769  | 0.807  | 0.107  | 0.184  | 0.425  | 0.736  | 0.056  | -0.013 |
| A012748_01 | 1.002  | 0.941  | 1.384  | 1.839  | 1.155  | 1.151  | 0.314  | 0.25   |
| A012749_01 | -0.649 | -0.583 | -0.368 | -0.333 | -0.204 | -0.33  | 0.017  | -0.075 |
| A012752_01 | -0.716 | -0.6   | -0.369 | -0.176 | -0.449 | -0.696 | -0.145 | -0.021 |
| A012754_01 | 0.554  | 0.58   | 0.191  | -0.692 | 0.351  | 0.681  | 0.141  | 0.123  |
| A012758_01 | -0.054 | 0.056  | 0.09   | -0.719 | 0.225  | 0.08   | 0.115  | 0.062  |
| A012760_01 | 0.083  | 0.149  | 0.327  | 0.151  | -0.155 | -0.115 | 0.155  | 0.201  |
| A012762_01 | -0.452 | -0.532 | 0.141  | 0.182  | -0.196 | NA     | -0.034 | -0.002 |
| A012767_01 | -0.075 | -0.097 | NA     | -0.186 | 0.246  | 0.122  | -0.061 | 0.065  |
| A012768_01 | -0.086 | -0.13  | 0      | 0.112  | -0.045 | -0.185 | -0.016 | -0.07  |
| A012769_01 | 0.16   | 0.359  | 0.859  | 0.331  | 0.42   | 0.309  | 0.55   | 0.576  |

|            |          |           |        |        |          |        |           |        |
|------------|----------|-----------|--------|--------|----------|--------|-----------|--------|
| A012770_01 | 0.02 NA  |           | -0.133 | -0.653 | 0.072 NA |        | 0.581     | 0.499  |
| A012771_01 | 0.092    | 0.032     | 0.492  | 0.087  | 0.287    | 0.238  | -0.032    | -0.052 |
| A012772_01 | -0.105   | 0.088     | 0.283  | -0.453 | 0.048    | 0.056  | 0.254     | 0.258  |
| A012773_01 | -0.217   | -0.071    | 0.461  | 0.539  | 0.016    | -0.128 | 0.323     | 0.316  |
| A012776_01 | -0.345   | -0.44     | 0.405  | 0.443  | -0.093   | -0.375 | 0.187     | 0.17   |
| A012778_01 | -1.118   | -1.425    | -0.427 | -0.838 | -1.065   | -1.486 | 0.038     | -0.077 |
| A012781_01 | -0.306   | -0.185    | -0.134 | -0.062 | -0.143   | -0.057 | 0.05      | 0.152  |
| A012787_01 | 0.192    | 0.088     | -0.172 | -0.078 | 0.162    | 0.203  | 0.128     | -0.054 |
| A012788_01 | 0.373    | 0.091     | -0.251 | -0.359 | 0.248    | 0.013  | -0.101    | -0.205 |
| A012791_01 | 0.448    | 0.307     | -0.105 | -0.623 | 0.387    | 0.435  | 0.007     | -0.145 |
| A012796_01 | 0.258    | 0.189     | 0.249  | 0.339  | -0.242   | -0.223 | -0.196    | -0.167 |
| A012797_01 | -0.67    | -0.741    | -1.007 | -0.607 | -0.126   | -0.087 | -0.176    | -0.2   |
| A012800_01 | 0.448    | 0.267     | 0.061  | 0.094  | 0.179    | 0.072  | -0.239    | -0.258 |
| A012807_01 | 0.485    | 0.405     | 0.221  | 0.247  | 0.267    | 0.262  | -0.2      | -0.191 |
| A012810_01 | -1.947   | -2.278    | -1.735 | -1.179 | -1.544   | -1.516 | -0.408    | -0.329 |
| A012811_01 | -0.535   | -0.725    | -0.379 | -0.822 | -0.204   | -0.47  | -0.192    | -0.254 |
| A012812_01 | 0.518    | 0.602     | 0.923  | 1.028  | 0.933    | 1.031  | -0.721 NA |        |
| A012813_01 | 0.547    | 0.783     | 0.782  | 0.385  | -0.943   | -0.616 | 0.173     | 0.307  |
| A012816_01 | 0.794    | 0.86      | 0.253  | 0.258  | 0.217    | 0.207  | 0.111 NA  |        |
| A012817_01 | 0.011    | 0.017     | -0.184 | -0.21  | 0.082    | 0.048  | -0.121    | -0.174 |
| A012818_01 | 0.413    | 0.371     | 0.345  | 0.16   | 0.035    | 0.343  | 0.318     | 0.223  |
| A012822_01 | 0.451    | 0.329     | -0.258 | -0.633 | 0.287    | 0.126  | 0.12      | -0.091 |
| A012823_01 | 0.568    | 0.528     | 0.375  | -0.307 | 0.406    | 0.617  | 0.119     | -0.071 |
| A012826_01 | -0.551   | -0.309    | 0.364  | -0.25  | -0.087   | 0.005  | -0.085    | 0.2    |
| A012828_01 | 0.014    | -0.006    | 0.035  | 0.352  | 0.01     | 0.144  | -0.049    | 0.07   |
| A012829_01 | 0.076    | 0.133     | -0.178 | 0.02   | 0.034    | 0.018  | 0.014     | -0.044 |
| A012830_01 | 0.541    | 0.254     | -0.379 | -0.591 | 0.305    | 0.433  | 0.069     | 0.027  |
| A012832_01 | 0.584    | 0.459     | 0.334  | -0.048 | 0.241    | 0.42   | -0.004    | 0.065  |
| A012834_01 | 0.58 NA  |           | -0.178 | 0.067  | 0.043 NA |        | 0.077     | -0.007 |
| A012835_01 | -0.108   | 0         | -0.206 | -0.626 | 0.171    | 0.256  | -0.269    | -0.116 |
| A012837_01 | 0.431    | 0.3       | 0.324  | 0.639  | 0.327    | 0.073  | -0.04     | -0.053 |
| A012838_01 | 0.525    | 0.393     | -0.363 | -0.208 | 0.013    | 0.273  | -0.197    | -0.095 |
| A012839_01 | -0.711   | -0.894    | -1.252 | -1.589 | -0.186   | -0.261 | -1.471    | -1.161 |
| A012841_01 | 0.187 NA |           | -0.062 | -0.357 | 0.375 NA |        | 0.12      | 0.128  |
| A012844_01 | 0.382    | 0.409     | -0.133 | 0.019  | -0.309   | -0.039 | -0.163    | -0.054 |
| A012846_01 | 0.226    | 0.305     | 0.101  | -0.12  | 0.055    | 0.146  | 0.097     | -0.146 |
| A012847_01 | -0.427   | -0.431    | -0.161 | -0.293 | -0.019   | 0.094  | 0.26      | 0.262  |
| A012849_01 | 0.577    | 0.427     | 0.104  | -0.074 | 0.375    | 0.543  | 0.163     | 0.15   |
| A012854_01 | -0.03    | 0.073     | 0.199  | 0.368  | 0.018    | -0.211 | 0.072     | 0.127  |
| A012858_01 | -0.11    | -0.188    | -0.372 | 0.3    | 0.12     | -0.015 | -0.124    | -0.091 |
| A012860_01 | -0.426   | -0.633    | -0.202 | -0.449 | -0.038   | 0.055  | 0.143     | 0.122  |
| A012862_01 | 0.173    | 0.16      | 0.082  | 0.088  | 0.13     | -0.144 | -0.11     | -0.194 |
| A012865_01 | -1.024   | -1.391    | -1.063 | -1.251 | -0.056   | -0.084 | -0.341    | -0.178 |
| A012872_01 | -3.239   | -3.258    | -1.822 | -1.761 | -2.298   | -2.565 | -1.31     | -0.842 |
| A012878_01 | 0.247    | 0.127     | 0.249  | 0.227  | 0.076    | 0.217  | -0.008 NA |        |
| A012880_01 | -0.738   | -0.393    | 0.886  | 1.377  | 0.829    | 1.531  | 1.192     | 1.086  |
| A012881_01 | -0.426   | -0.188    | 0.183  | 0.049  | -0.138   | -0.154 | -0.075    | 0.094  |
| A012883_01 | 0.64     | 0.664     | 0.375  | 0.429  | 0.119    | 0.223  | 0.029     | 0.13   |
| A012885_01 | -0.397   | -0.522    | -0.444 | -0.203 | 0.049    | -0.224 | -0.108    | -0.084 |
| A012887_01 | 0.355    | 0.613     | 0.25   | 0.617  | -0.021   | -0.032 | -0.265    | -0.186 |
| A012888_01 | -0.434   | -0.984    | -1.019 | -1.146 | -0.284   | -0.531 | -0.656    | -0.698 |
| A012889_01 | 1.077    | 1.036     | 1.4    | 1.431  | 0.449    | 0.333  | 0.152     | -0.044 |
| A012890_01 | -0.971   | -0.636    | -0.641 | -0.23  | -0.394   | -0.151 | -0.644 NA |        |
| A012893_01 | -2.811   | -2.808    | -3.709 | -4.031 | -1.976   | -2.932 | -2.932    | -2.24  |
| A012895_01 | 0.351    | 0.25      | 0.014  | -0.673 | 0.239    | 0.394  | -0.173    | -0.169 |
| A012896_01 | 0.441    | 0.251     | 0.282  | 0.26   | 0.129    | 0.131  | 0.19      | -0.005 |
| A012897_01 | -0.857   | -0.75     | -0.525 | 0.02   | -0.538   | -0.745 | -0.328    | -0.136 |
| A012899_01 | 0.477    | 0.388     | -0.049 | 0.466  | -0.092   | -0.147 | -0.205    | -0.143 |
| A012907_01 | 0.474    | 0.3       | 0.258  | 0.252  | 0.158 NA |        | 0.08 NA   |        |
| A012913_01 | -0.111   | -0.29     | -0.527 | -0.084 | -0.242   | -0.361 | -0.265    | -0.198 |
| A012917_01 | 0.323    | 0.449     | -0.04  | -0.332 | 0.277    | 0.278  | 0.055     | 0.016  |
| A012919_01 | 0.297    | 0.012     | -0.26  | -0.785 | 0.064    | 0.071  | 0.038     | -0.042 |
| A012921_01 | -0.109   | -0.29     | -0.126 | -0.413 | 0.02     | -0.116 | 0.059     | -0.14  |
| A012930_01 | 0.213    | 0.167     | -0.122 | -0.183 | 0.262    | 0.312  | -0.027    | -0.203 |
| A012932_01 | 0.047    | 0.058     | 0.088  | 0.142  | 0.355    | 0.375  | -0.087    | -0.17  |
| A012934_01 | -0.465   | -0.442    | 0.029  | -0.605 | 0.009    | 0.012  | 0.013     | 0.065  |
| A012936_01 | -0.162   | -0.149 NA |        | 0      | 0.012    | -0.02  | -0.088 NA |        |
| A012937_01 | 0.183    | 0.011     | 0.192  | -0.518 | 0.134    | 0.037  | 0.299     | 0.132  |

|            |           |        |          |           |           |        |           |        |
|------------|-----------|--------|----------|-----------|-----------|--------|-----------|--------|
| A012940_01 | -1.32     | -1.01  | -0.327   | -0.428    | -0.353    | -0.378 | 0.005     | 0.049  |
| A012944_01 | 0.083     | 0.277  | 0.429    | -0.438    | 0.227     | 0.309  | 0.006     | 0.094  |
| A012946_01 | 0.403     | 0.403  | -0.189   | -0.198    | 0.169     | 0.387  | 0.018     | 0.106  |
| A012951_01 | 0.163     | 0.078  | -0.2     | -0.422    | 0.214     | 0.043  | -0.047    | -0.022 |
| A012958_01 | -0.206    | -0.225 | -0.136   | -0.532    | -0.167    | -0.172 | 0.075     | 0.04   |
| A012959_01 | -0.132    | -0.326 | -0.413   | -0.401    | -0.019    | 0.076  | -0.194    | -0.167 |
| A012960_01 | 0.032     | 0.093  | -0.063   | 0.436     | 0.082     | -0.057 | -0.183    | -0.053 |
| A012964_01 | 0.104     | 0.207  | 0.104    | -0.456    | 0.202     | 0.203  | 0.333     | 0.386  |
| A012966_01 | -0.876    | -0.935 | -0.229   | -0.366    | -0.704    | -0.796 | -0.077    | 0.024  |
| A012972_01 | -0.251    | -0.349 | -0.104   | 0.217     | 0.184 NA  |        | 0.033     | 0.16   |
| A012977_01 | 0.277     | 0.528  | 0.196    | 0.466     | -0.216    | -0.255 | -0.199    | -0.176 |
| A012978_01 | -0.752    | -0.729 | 0.066    | 0.123     | -0.889    | -0.927 | -0.119    | 0.177  |
| A012982_01 | 0.105     | 0.341  | 0.693    | 0.533     | 0.329     | 0.453  | 0.169     | 0.345  |
| A012986_01 | -1.88     | -1.941 | -1.958   | -1.941    | -0.794    | -1.205 | -0.905    | -0.872 |
| A012989_01 | -0.041    | 0.053  | -0.326   | -0.394    | 0.001     | -0.031 | -0.049    | -0.082 |
| A012995_01 | 0.589     | 0.48   | -0.187   | -0.497    | 0.196     | 0.534  | -0.02     | -0.163 |
| A013000_01 | 0.277     | 0.087  | -0.334   | -0.594    | 0.156     | 0.367  | -0.194    | -0.078 |
| A013003_01 | 0.663     | 0.831  | 0.925    | 0.85      | 0.421     | 0.582  | 1.084     | 0.815  |
| A013004_01 | -0.729    | -0.899 | -0.426   | -0.061    | -0.091    | -0.259 | -0.432    | -0.354 |
| A013011_01 | -0.987    | -0.937 | -0.223   | -0.486    | 0.056     | -0.081 | 0.123     | 0.077  |
| A013012_01 | -0.074    | -0.278 | 0.027    | 0.252     | -0.554    | -0.895 | 0.174     | 0.149  |
| A013018_01 | 0.244     | 0.279  | -0.031   | -0.246    | 0.015     | 0.133  | 0.047     | -0.11  |
| A013019_01 | -0.113    | -0.111 | 0.003    | -0.267    | 0.01      | 0.116  | 0.434     | 0.324  |
| A013022_01 | 0.189     | 0.17   | 0.256    | 0.346     | 0.087     | -0.027 | -0.12     | -0.11  |
| A013026_01 | -0.17     | -0.095 | 0.099    | 0.104     | 0.135     | 0.141  | 0.028     | -0.041 |
| A013029_01 | -0.007    | 0.434  | 0.496    | -0.035    | -0.084    | 0.277  | -0.092    | 0.275  |
| A013032_01 | 0.021     | 0.236  | 0.202    | -0.14     | 0.171     | 0.138  | 0.077     | 0.309  |
| A013034_01 | 1.45      | 1.374  | 1.336    | 0.921     | 0.007     | 0.053  | 0.431     | 0.148  |
| A013035_01 | -0.049    | -0.151 | 0.117    | -0.274    | 0.037     | -0.123 | -0.077    | -0.199 |
| A013036_01 | 0.247     | 0.393  | 0.304    | 0.292     | -0.231    | 0.051  | 0         | 0.169  |
| A013038_01 | -0.619 NA |        | 0.189 NA |           | -0.325 NA |        | -0.155    | 0.413  |
| A013040_01 | -0.018    | 0.085  | 0.077    | -0.265    | -0.083    | 0.092  | -0.05     | -0.035 |
| A013044_01 | 0.195     | 0.171  | -0.151   | -0.106    | 0.29      | 0.104  | 0.035     | -0.015 |
| A013046_01 | 0.217     | 0.149  | 0.403    | 0.351     | 0.114     | 0.101  | 0.2       | 0.148  |
| A013047_01 | 0.326     | 0.11   | -0.028   | -0.007    | 0.05      | 0.213  | -0.259    | -0.284 |
| A013050_01 | -0.013    | -0.236 | 0.051    | -0.027    | 0.248     | 0.17   | -0.047    | -0.148 |
| A013051_01 | -0.657    | -0.656 | -0.642   | -0.605    | 0.238     | -0.136 | 0.326     | 0.172  |
| A013053_01 | -0.105    | -0.146 | -0.078   | -0.101    | -0.158    | -0.319 | -0.201    | -0.067 |
| A013055_01 | -0.309    | -0.306 | -0.421   | -0.109    | -0.28     | -0.475 | -0.297 NA |        |
| A013058_01 | 0.069     | 0.094  | -0.24    | 0.015     | -0.11     | -0.003 | 0.04      | 0.106  |
| A013062_01 | 0.954     | 0.932  | 0.206    | 0.043     | 0.423     | 0.816  | 0.053 NA  |        |
| A013063_01 | -0.473    | -0.464 | -0.082   | -0.29     | -0.275    | -0.332 | -0.505    | -0.141 |
| A013065_01 | 0.312     | 0.243  | 0.28     | 0.014     | 0.042     | 0.13   | 0.306     | 0.248  |
| A013067_01 | 0.01      | 0.029  | 0.268 NA |           | 0.044     | 0.018  | 0.031 NA  |        |
| A013073_01 | 0.671     | 0.664  | 0.404    | 0.436     | 0.573     | 0.733  | 0.131     | 0.12   |
| A013074_01 | 0.686     | 0.72   | -0.144   | -0.727    | 0.114     | 0.574  | 0.118     | -0.008 |
| A013075_01 | 0.493     | 0.366  | -0.026   | 0.333     | 0.132 NA  |        | -0.146    | -0.125 |
| A013086_01 | 0.408     | 0.335  | 0.159    | 0.675     | 0.073     | 0.006  | 0.019     | -0.024 |
| A013087_01 | 0.599     | 0.64   | 0.428    | -0.067    | -0.082    | 0.257  | 0.09      | 0.207  |
| A013088_01 | 0.123     | 0.068  | -0.021   | -0.591    | 0.312     | 0.245  | 0.135     | -0.005 |
| A013090_01 | 0.043     | 0.08   | -0.56    | -0.704    | 0.015     | -0.114 | -0.241    | -0.112 |
| A013093_01 | -0.372    | -0.487 | -0.046   | 0.411     | -0.195    | -0.298 | -0.196    | -0.257 |
| A013095_01 | 0.434     | 0.879  | 0.661    | 0.368     | 0.9       | 1.276  | 0.036     | 0.16   |
| A013098_01 | -0.633    | -0.312 | -0.016   | -0.246    | -0.158    | -0.184 | 0.147     | 0.084  |
| A013105_01 | -0.265    | -0.363 | -0.533   | -0.353 NA | NA        |        | -0.148    | -0.25  |
| A013107_01 | -0.92     | -1.093 | 0.049    | -0.218    | -0.662    | -0.723 | 0.219     | 0.069  |
| A013109_01 | -0.115    | -0.273 | -0.01    | -0.044    | 0.255     | 0.228  | 0.339     | 0.251  |
| A013111_01 | 0.137     | 0.205  | -0.003   | -0.311    | 0.099     | 0.212  | -0.094    | 0.116  |
| A013112_01 | 0.221     | 0.376  | -0.045   | 0.023     | 0.193     | 0.121  | -0.142    | 0.132  |
| A013118_01 | 0.046     | 0.194  | -0.043   | -0.108    | 0.017     | 0.139  | -0.045    | -0.068 |
| A013119_01 | 0.606     | 0.4    | 0.051    | -0.057    | -0.232    | 0.058  | -0.022    | -0.075 |
| A013129_01 | 1.229     | 0.796  | 0.693    | -0.056    | 0.335     | 0.627  | 0.191     | 0.108  |
| A013130_01 | 0.151     | 0.018  | -0.037   | -0.204 NA |           | -0.075 | 0.068     | -0.094 |
| A013142_01 | -0.696    | -0.705 | -0.489   | -0.728    | -0.038    | -0.088 | -0.293    | -0.266 |
| A013143_01 | 0.679     | 0.611  | 0.445    | -0.061    | 0.167     | 0.203  | 0.191     | 0.018  |
| A013154_01 | 0.225     | 0.03   | 0.014    | -0.077    | 0.116     | 0.038  | 0.086     | -0.105 |
| A013156_01 | 0.42      | 0.144  | 0.245    | 0.146     | 0.25      | 0.199  | 0.421     | 0.252  |
| A013164_01 | 0.195     | 0.134  | -0.471   | 0.168     | -0.169    | -0.047 | -0.293    | -0.172 |



|            |           |           |        |          |           |          |           |        |
|------------|-----------|-----------|--------|----------|-----------|----------|-----------|--------|
| A013188_01 | 0.269     | 0.376     | 0.767  | 1.122    | 0.315     | 0.421    | 0.779     | 0.969  |
| A013192_01 | 0.376     | -0.001    | 0.051  | -0.335   | 0.213     | 0.022    | 0.12      | 0.099  |
| A013196_01 | 0.078     | 0.317     | -0.208 | -0.033   | -0.057    | -0.023   | -0.22     | -0.155 |
| A013212_01 | -0.563    | -0.645    | -0.21  | -0.949   | -0.156    | 0.067    | -0.154    | -0.013 |
| A013215_01 | 0.632     | 0.458     | 0.347  | 0.093    | 0.228     | 0.66     | 0.34      | 0.37   |
| A013219_01 | -0.266    | -0.157    | -0.101 | -0.059   | 0.11      | 0.037    | 0.026     | 0.057  |
| A013223_01 | 0.365     | 0.338     | 0.153  | -0.177   | 0.165     | 0.367    | 0.135     | 0.345  |
| A013227_01 | -0.281    | -0.332    | -0.145 | -0.077   | 0.101     | 0.015    | -0.044    | -0.13  |
| A013238_01 | -2.496    | -2.728    | -3.592 | -3.964   | -2.355    | -2.821   | -2.712    | -1.924 |
| A013240_01 | 0.659     | 0.561     | 0.646  | 0.493    | 0.202     | 0.227    | 0.14      | 0.134  |
| A013244_01 | -0.183    | -0.225    | -0.047 | 0.249    | -0.031    | -0.188   | -0.143    | -0.184 |
| A013246_01 | -0.002    | -0.321    | -0.201 | 0.326    | 0.101     | -0.343   | -0.259 NA |        |
| A013249_01 | -0.225    | -0.2      | -0.332 | -0.033   | -0.078    | -0.02 NA |           | -0.129 |
| A013260_01 | -0.29     | -0.558    | -0.278 | -0.041   | 0.077     | -0.083   | 0.012     | -0.086 |
| A013266_01 | 0.118     | 0.168     | 0.073  | -0.345   | 0.042     | 0.175    | 0.163     | 0.086  |
| A013268_01 | -0.332    | -0.278    | 0.142  | -0.17    | 0.057     | -0.028   | 0.379     | 0.283  |
| A013270_01 | -0.047    | -0.027    | -0.084 | -0.12    | 0.207     | 0.257    | 0.02      | -0.06  |
| A013277_01 | 0.192     | 0.296     | -0.173 | -0.411   | -0.035    | 0.447    | 0.198     | 0.195  |
| A013278_01 | 0.034     | -0.046    | -0.178 | -0.161   | 0.009     | -0.082   | -0.127    | -0.175 |
| A013281_01 | 0.343     | 0.243     | -0.155 | 0.064    | -0.054 NA |          | -0.033    | -0.112 |
| A013282_01 | 0.425     | 0.205     | 0.298  | -0.297   | 0.16      | 0.091    | 0.334     | 0.08   |
| A013287_01 | 0.236     | 0.293     | -0.072 | -0.483   | 0.285     | 0.286    | 0.067     | 0.028  |
| A013299_01 | 0.11      | 0.05      | 0.114  | 0.021    | -0.011    | -0.122   | 0.034     | -0.116 |
| A013356_01 | -0.363    | -0.134    | 0.148  | 0.231    | -0.12     | -0.2     | -0.041    | 0.07   |
| A013397_01 | 0.513     | 0.682     | 0.635  | 0.254    | 0.357     | 0.415    | 0.069     | 0.284  |
| A013402_01 | -0.043    | -0.083    | -0.595 | -0.758   | 0.261     | 0.086    | 0.283     | 0.094  |
| A013406_01 | 0.501     | 0.528     | 0.789  | 0.189    | 0.295 NA  |          | 0.583 NA  |        |
| A013408_01 | -0.118    | -0.11     | -0.29  | 0.005    | -0.105    | -0.176   | -0.134    | -0.13  |
| A013412_01 | 0.403     | 0.332     | -0.374 | 0.08     | -0.073    | -0.132   | -0.189    | -0.541 |
| A013413_01 | -0.741    | -1.051    | -0.97  | -1.422   | 0.444     | 0.162    | 0.184     | -0.04  |
| A013414_01 | 0.595     | 0.264     | 0.256  | 0.222    | 0.277     | 0.232    | 0.146     | -0.065 |
| A013416_01 | -0.252    | -0.089    | -0.381 | -0.516   | -0.042    | -0.17    | 0.131     | -0.024 |
| A013417_01 | 1.28      | 1.229     | 0.849  | 0.949    | 0.686     | 1.076    | 0.361     | 0.354  |
| A013419_01 | -0.146    | -0.019    | 0.07   | -0.165   | 0.097     | 0.157    | 0.222     | 0.35   |
| A013420_01 | -0.352    | -0.502 NA | NA     |          | -0.032    | -0.339   | -0.271    | -0.428 |
| A013421_01 | -0.031    | 0.004     | -0.526 | -0.335   | 0.054     | 0.084    | -0.182    | -0.223 |
| A013423_01 | -0.231    | -0.218    | -0.125 | 0.241    | 0.155     | -0.147   | -0.09     | -0.092 |
| A013428_01 | 0.05      | 0.048     | -0.366 | -0.39    | 0.282     | 0.072    | -0.033    | -0.163 |
| A013429_01 | 1.049     | 1.057     | 0.957  | 0.158    | 0.476     | 0.617    | 0.653     | 0.506  |
| A013435_01 | -0.661    | -0.866    | 0.037  | -0.088   | 0.524     | 0.517    | 0.451     | 0.246  |
| A013440_01 | 0.377     | 0.168     | 0.538  | 0.207    | 0.057     | -0.021   | 0.188     | -0.107 |
| A013447_01 | -0.94     | -1.413 NA | NA     |          | -0.107    | -0.577   | 0.131 NA  |        |
| A013461_01 | -0.232    | -0.238    | -0.151 | -0.078   | -0.103    | -0.329   | -0.262    | -0.065 |
| A013462_01 | 0.105     | -0.042    | 0.088  | -0.355   | 0.04      | 0.021    | 0.014     | -0.019 |
| A013463_01 | -0.504    | -0.582    | -0.422 | -0.036   | -0.237    | -0.231   | -0.344    | -0.353 |
| A013467_01 | -0.565    | -0.453    | -0.391 | -0.123   | -0.651    | -0.713   | 0.241     | 0.133  |
| A013468_01 | -0.178    | -0.257    | -0.405 | -0.697   | 0.027     | 0.181    | -0.16     | -0.112 |
| A013469_01 | 0.216     | 0.146     | 0.075  | -0.456   | 0.229     | 0.074    | 0.207     | 0.09   |
| A013470_01 | -0.359    | -0.311    | -0.544 | -0.684   | 0.068     | -0.085   | -0.093    | -0.175 |
| A013475_01 | -0.085    | -0.436    | -0.383 | -0.025   | -0.079    | -0.518   | -0.493    | -0.656 |
| A013477_01 | 0.112 NA  |           | -0.104 | -0.108   | 0.075 NA  |          | -0.083 NA |        |
| A013479_01 | -0.243 NA |           | 0.088  | -0.096   | 0.063 NA  |          | -0.011    | -0.018 |
| A013487_01 | 0.181     | 0.073     | -0.028 | -0.007   | 0.198     | 0.099    | -0.115    | -0.061 |
| A013488_01 | 0.48      | 0.278     | 0.329  | -0.195   | -0.044    | -0.234   | 0.313     | 0.072  |
| A013490_01 | -0.119    | -0.028    | 0.075  | -0.402   | 0.147     | 0.119    | 0.143     | -0.014 |
| A013498_01 | 0.414     | 0.355     | -0.225 | 0.604    | 0.14      | -0.018   | -0.228    | -0.304 |
| A013503_01 | -0.146    | -0.38     | -0.364 | 0.346    | 0.033     | -0.113   | -0.24     | -0.273 |
| A013510_01 | -0.332    | -0.588 NA |        | -0.887   | -0.139    | -0.395   | -0.287    | -0.326 |
| A013518_01 | 0.287     | 0.167     | 0.416  | -0.204   | 0.077     | 0.125    | 0.379     | 0.225  |
| A013519_01 | -0.84     | -0.478    | 0.207  | -0.036   | -0.014    | 0.071    | 0.497     | 0.828  |
| A013520_01 | 0.164     | -0.193    | 0.39   | 0.273 NA |           | 0.036    | 0.389     | 0.041  |
| A013522_01 | 0.189     | 0.278     | 0.147  | -0.073   | -0.176    | -0.197   | -0.22     | -0.085 |
| A013534_01 | 0.082     | 0.068     | 0.328  | -0.101   | 0.032     | -0.047   | -0.045    | -0.029 |
| A013535_01 | -2.248    | -2.128    | -0.429 | -0.553   | -0.513    | -0.361   | -0.27     | 0.163  |
| A013537_01 | 0.461     | 0.412     | 0.693  | 0.699    | 0.106     | 0.679    | 0.245     | 0.162  |
| A013547_01 | 0.07      | -0.017    | -0.025 | -0.005   | 0.28      | 0.167    | 0.058     | -0.089 |
| A013548_01 | 0.185     | 0.111     | 0.155  | 0.454    | 0.2       | 0.087    | -0.024 NA |        |
| A013554_01 | -1.475    | -1.416    | 0.055  | 0.452    | -1.659    | -1.861   | 0.379     | 0.509  |

|            |           |           |          |           |           |          |           |        |
|------------|-----------|-----------|----------|-----------|-----------|----------|-----------|--------|
| A013555_01 | -1.363    | -1.33     | 0.244    | 0.011     | -1.309    | -1.631   | 0.766     | 0.491  |
| A013559_01 | -1.37     | -1.678    | -1.17    | -1.321    | -0.853    | -1.153   | -0.71     | -0.614 |
| A013560_01 | -0.26     | -0.591    | -0.879   | -0.949    | 0.03      | -0.06    | -0.294    | -0.233 |
| A013561_01 | -0.14     | -0.354    | 0.048    | 0.057     | -0.41     | -0.629   | 0.148 NA  |        |
| A013562_01 | 0.08      | 0.373     | 0.058 NA |           | 0.744     | 0.755    | 0.486     | 0.43   |
| A013564_01 | -0.513    | -0.607    | -0.035   | 0.308     | -0.091    | -0.398   | 0.041     | 0.072  |
| A013571_01 | -0.293    | -0.441    | 0.146    | -0.101    | -0.036    | -0.315   | -0.024    | -0.297 |
| A013572_01 | -0.585    | -0.703    | -0.313   | 0.188     | -0.174    | -0.408   | -0.293    | -0.272 |
| A013574_01 | 0.005     | 0.065     | 0.01     | 0.003     | 0.046     | 0.055    | 0.003     | -0.117 |
| A013577_01 | 0.027     | 0.078     | 0.079    | 0.139     | 0.082     | 0.106    | -0.029    | 0.028  |
| A013579_01 | 0.395     | 0.328     | 0.054    | 0.43      | 0.194     | 0.158    | -0.261    | -0.148 |
| A013586_01 | -0.532    | -0.565    | -0.43    | -0.223    | 0.176 NA  |          | -0.095 NA |        |
| A013590_01 | -0.166    | -0.12     | -0.012   | -0.068    | 0.129     | -0.103   | 0.053 NA  |        |
| A013591_01 | -0.142    | -0.197    | 0.059    | -0.221    | 0.138     | -0.192   | 0.224     | -0.071 |
| A013604_01 | -0.18     | -0.512    | -0.292   | -0.042    | 0.103     | -0.076   | 0.129     | -0.05  |
| A013605_01 | -0.383    | -0.483    | -0.376   | 0.112     | 0.014     | -0.115   | 0.123     | 0.076  |
| A013606_01 | -0.149    | -0.149    | 0.146    | 0.2       | -0.19     | -0.317   | -0.008    | 0.034  |
| A013614_01 | 0.163     | -0.182    | 0.505    | 0.447     | 0.054     | -0.244   | -0.309 NA |        |
| A013616_01 | 0.352     | 0.354     | -0.11    | -0.169    | 0.15      | 0.087    | -0.103    | -0.17  |
| A013617_01 | 0.356     | 0.251     | 0.061    | 0.035     | 0.169     | -0.054   | -0.2      | -0.321 |
| A013618_01 | -1.574    | -2.014    | 0.103    | 0.652     | -0.834    | -1.4     | 0.346     | 0.231  |
| A013619_01 | 0.233     | -0.092    | -0.118   | 0.035     | 0.215     | 0.176    | 0.04      | -0.068 |
| A013622_01 | 0.399     | 0.358     | 0.106    | -0.057    | 0.199     | 0.141    | -0.096    | -0.132 |
| A013625_01 | 0.011     | -0.136    | 0.069    | -0.099    | 0.053     | -0.118   | 0.078     | -0.257 |
| A013627_01 | -0.501    | -0.458    | -0.776   | -1.09     | -0.299    | -0.243   | -0.388    | -0.157 |
| A013628_01 | 0.022     | -0.013    | 0.033    | 0.097     | 0.225     | 0.168    | 0.011     | 0.027  |
| A013632_01 | -0.152    | -0.309 NA |          | -0.09     | 0.24      | 0.275 NA | NA        |        |
| A013633_01 | -0.051    | -0.208    | 0.086    | 0.435     | -0.013    | -0.453   | 0.039     | -0.084 |
| A013634_01 | -0.066    | -0.013    | -0.229   | -0.213    | 0.148     | 0.103    | -0.248    | -0.212 |
| A013637_01 | -0.186    | -0.284    | 0.288    | -0.014    | 0.05      | -0.145   | 0.103 NA  |        |
| A013640_01 | 0.305     | 0.189     | -0.069   | -0.394    | 0.169     | 0.25     | 0.029     | 0.035  |
| A013643_01 | 0.308     | 0.263     | 0.225    | -0.476    | 0.522     | 0.596    | 0.272     | 0.025  |
| A013644_01 | 0.332     | 0.241     | 0.144    | -0.2      | -0.093    | -0.029   | 0.124     | 0.094  |
| A013646_01 | 0.064     | 0.005     | 0.215    | 0.167     | 0.194     | 0.137    | -0.109    | 0.075  |
| A013647_01 | 0.11      | 0.156     | 0.069    | -0.213    | 0.246     | 0.297    | -0.003    | -0.272 |
| A013651_01 | 0.129     | 0.302     | -0.072   | -0.203    | -0.101    | -0.2     | -0.114    | -0.037 |
| A013657_01 | -0.53     | -0.265    | -0.325   | -0.375    | -0.081    | -0.251   | -0.636    | -0.608 |
| A013658_01 | 0.306     | 0.27      | 0.001    | -0.084    | 0.116     | 0.078    | -0.055    | -0.155 |
| A013659_01 | 0.891     | 0.713     | 0.558    | 0.675     | 0.021     | 0.222    | -0.01     | -0.171 |
| A013660_01 | 0.206     | 0.264     | 0.165    | -0.064    | 0.381     | 0.238    | 0.044     | -0.072 |
| A013661_01 | 0.132     | 0.028     | -0.17    | -0.046    | 0.215     | 0.146    | -0.242    | -0.101 |
| A013662_01 | 0.216     | 0.197     | 0.134    | -0.446    | 0.075     | 0.175    | 0.09 NA   |        |
| A013663_01 | -0.223    | -0.427    | -0.382   | -0.645    | 0.073 NA  |          | -0.2      | -0.272 |
| A013664_01 | -0.297    | -0.26     | -0.46    | -0.754    | 0.069     | 0.063    | -0.35     | -0.221 |
| A013667_01 | 0.295     | 0.305     | 0.205    | -0.278    | -0.193    | -0.475   | 0.343     | 0.06   |
| A013668_01 | -0.478    | -0.2      | -0.471   | 0.081     | -0.203    | 0.087    | -0.216    | -0.043 |
| A013669_01 | -0.587    | -0.378    | -0.025   | -0.114    | -0.099    | -0.084   | 0.13      | 0.02   |
| A013671_01 | 0.559     | 0.408     | 0.176    | -0.304    | 0.228     | 0.213    | 0.03      | -0.053 |
| A013674_01 | 0.408     | 0.284     | 0.002    | 0.131     | 0.079     | -0.09    | -0.16     | -0.108 |
| A013675_01 | 0.436     | 0.112     | 0.137    | -0.09     | 0.23      | 0.188    | 0.315     | 0.05   |
| A013676_01 | 0.729     | 0.682     | 1.903    | 1.729     | 1.275     | 1.231    | 0.594     | 0.651  |
| A013680_01 | 0.363     | 0.064     | -0.239   | -0.013    | 0.043     | 0.225    | 0.052     | -0.15  |
| A013681_01 | -0.301    | -0.32     | -0.093   | 0.127     | -0.349    | -0.426   | -0.142    | -0.177 |
| A013682_01 | 0.302     | 0.304     | -0.519   | -1.048    | 0.262 NA  |          | -0.012    | -0.134 |
| A013684_01 | -0.239 NA |           | 0.146    | 0.132     | -0.033 NA |          | 0.177 NA  |        |
| A013685_01 | 0.462     | 0.497     | 0.218    | 0.313     | 0.202     | 0.071 NA | NA        |        |
| A013689_01 | -0.085    | -0.086    | 0.008    | -0.293    | 0.186     | 0.121    | 0.046     | -0.101 |
| A013691_01 | 0.015     | -0.046    | 0.538    | 0.785     | 0.185     | 0.102    | -0.634    | -0.758 |
| A013692_01 | 0.628     | 0.611     | 0.361    | -0.48     | 0.182     | 0.196    | 0.053     | 0.124  |
| A013695_01 | -0.176    | -0.182    | -0.773   | -0.507    | 0.016     | 0.044    | 0.033     | 0.027  |
| A013697_01 | 0.23      | 0.25      | 0.064    | -0.236    | 0.795     | 1.017    | -0.317    | -0.187 |
| A013699_01 | 0.405     | 0.433     | 0.308    | 0.066     | -0.249    | 0.061    | -0.191    | -0.031 |
| A013700_01 | -0.67 NA  |           | -0.896   | -0.992 NA |           | 0.332    | 0.058     | -0.019 |
| A013705_01 | -0.219    | -0.425    | 0.376    | -0.23     | -0.14     | -0.36    | 0.546     | 0.408  |
| A013707_01 | 0.101     | -0.099    | -0.184   | 0.194     | 0.059     | -0.202   | -0.184    | -0.365 |
| A013710_01 | 0.016     | 0.061     | -0.363   | -0.104    | 0.119     | -0.057   | 0.006     | -0.058 |
| A013711_01 | 0.811     | 0.586     | 0.233    | 1.046     | -0.661    | -1.205   | -1.238    | -1.032 |
| A013714_01 | -0.046    | 0.148     | 0.517    | 0.095     | 0.273     | 0.655    | -0.188    | 0.051  |

|            |           |        |        |        |           |        |           |        |
|------------|-----------|--------|--------|--------|-----------|--------|-----------|--------|
| A013715_01 | 0.09      | -0.032 | 0.023  | 0.013  | 0.102     | 0.119  | -0.165    | -0.297 |
| A013717_01 | -0.179    | -0.362 | -0.906 | -0.991 | -0.212    | 0.272  | -0.452    | -0.43  |
| A013719_01 | -0.767    | -0.786 | -0.005 | -0.376 | -0.22     | 0.08   | -0.001    | 0.118  |
| A013720_01 | -0.055    | -0.234 | -0.349 | 0.02   | 0.045     | -0.121 | -0.024    | -0.153 |
| A013721_01 | 0.19      | -0.034 | -0.607 | -1.215 | 0.032     | 0.342  | -0.338    | -0.393 |
| A013723_01 | -0.217    | -0.218 | -0.339 | -0.293 | 0.162     | -0.175 | -0.047    | -0.124 |
| A013724_01 | -0.289    | -0.351 | -0.272 | -0.14  | 0.006     | -0.014 | -0.106    | 0.035  |
| A013727_01 | 0.324     | 0.407  | 0.042  | -0.139 | 0.011     | 0.107  | -0.207    | -0.21  |
| A013728_01 | -0.121    | 0.114  | 0.245  | -0.151 | 0.06      | -0.078 | -0.02     | 0.095  |
| A013731_01 | 0.367     | 0.175  | 0.426  | 0.023  | 0.29 NA   |        | 0.041 NA  |        |
| A013732_01 | -0.965    | -1.338 | -1.614 | -1.651 | -0.444    | -0.559 | -1.208    | -0.975 |
| A013733_01 | 0.488     | 0.247  | 0.252  | 0.651  | 0.226     | 0.121  | 0.012     | -0.092 |
| A013735_01 | -0.454    | -0.509 | 0.078  | -0.157 | -0.078    | -0.184 | -0.219    | -0.111 |
| A013736_01 | -0.251    | -0.257 | -0.029 | -0.129 | 0.038     | 0.144  | 0.108     | 0.059  |
| A013739_01 | -0.244    | -0.514 | -0.497 | 0.182  | -0.22 NA  |        | -0.208 NA |        |
| A013744_01 | -0.732    | -0.759 | -0.468 | -0.876 | -0.35     | -0.332 | -0.271    | 0.063  |
| A013746_01 | 0.237     | -0.055 | -0.25  | -0.315 | -0.116    | 0.043  | -0.075    | -0.131 |
| A013747_01 | 0.138     | 0.238  | 0.08   | -0.396 | -0.124    | -0.047 | 0.038     | 0.063  |
| A013749_01 | -0.89     | -1.217 | -0.043 | 0.032  | -0.303    | -0.647 | 0.005     | 0.064  |
| A013751_01 | -0.368    | -0.491 | -0.518 | -0.257 | 0.07      | 0.071  | -0.174    | -0.056 |
| A013755_01 | -0.309    | -0.315 | -0.483 | -0.512 | -0.794    | -0.849 | -0.524    | -0.41  |
| A013756_01 | -0.374    | -0.021 | -0.093 | 0.11   | 0.194     | 0.047  | -0.107    | -0.083 |
| A013758_01 | 0.035     | 0.131  | 0.194  | -0.119 | -0.085    | 0.07   | 0.087     | 0.102  |
| A013764_01 | 0.473     | 0.765  | 0.156  | 0.257  | -0.126    | 0.09   | -0.157    | 0.152  |
| A013765_01 | 0.236     | 0.168  | 0.148  | -0.028 | 0.095     | 0.308  | 0.362     | 0.332  |
| A013770_01 | -0.632    | -0.862 | -0.223 | -0.198 | -0.039    | -0.081 | 0.061     | -0.053 |
| A013773_01 | 0.072     | 0.085  | -0.228 | -0.737 | -0.007    | 0.062  | -0.105    | -0.035 |
| A013774_01 | -0.324    | -0.548 | -0.149 | -0.406 | -0.697    | -0.86  | -0.315    | -0.304 |
| A013775_01 | -0.149 NA |        | 0.275  | 0.044  | -0.32 NA  |        | -0.057    | 0.068  |
| A013778_01 | -0.422    | -0.056 | 0.314  | -0.058 | 0.013     | 0.015  | -0.073    | -0.141 |
| A013780_01 | -0.509    | -0.926 | -0.902 | -0.923 | 0.269     | 0.275  | -0.181    | -0.445 |
| A013782_01 | 0.369     | 0.283  | 0.394  | 0.443  | 0.391     | 0.31   | -0.051    | -0.117 |
| A013785_01 | 0.409     | 0.1    | 0.253  | -0.196 | 0.196     | 0.004  | 0.187     | 0.015  |
| A013787_01 | 0.559     | 0.609  | 0.234  | 0.2    | 0.191     | 0.212  | -0.266    | -0.103 |
| A013795_01 | -0.034    | -0.303 | -0.438 | -0.538 | 0.156     | -0.106 | -0.156    | -0.17  |
| A013796_01 | -0.476    | -0.47  | 0.164  | -0.253 | -0.162    | -0.169 | -0.031    | 0.022  |
| A013799_01 | -0.901    | -1.12  | -0.352 | -0.325 | -0.176    | -0.327 | -0.075    | 0.003  |
| A013801_01 | -0.116    | -0.321 | 0.139  | -0.005 | 0.065     | 0.004  | 0.045     | 0.021  |
| A013805_01 | 0.039     | -0.204 | 0.029  | 0.254  | 0.425     | 0.39   | -0.303    | -0.35  |
| A013806_01 | 0.169     | 0.156  | 0.424  | -0.029 | 0.1       | 0.076  | 0.021     | -0.021 |
| A013807_01 | -0.088    | -0.27  | -0.005 | 0.207  | -0.019    | -0.216 | -0.01     | -0.121 |
| A013810_01 | 0.308     | 0.099  | 0.39   | -0.33  | 0.008 NA  |        | 0.07 NA   |        |
| A013829_01 | 0.147     | 0.157  | 0.29   | -0.272 | 0.123     | -0.005 | -0.179    | -0.171 |
| A013831_01 | -0.887    | -1.245 | 0.015  | 0.339  | -0.189 NA |        | -0.074    | -0.162 |
| A013832_01 | 0.413     | 0.4    | 0.048  | -0.465 | 0.152     | 0.186  | 0.031     | -0.039 |
| A013833_01 | -0.213    | -0.374 | -0.642 | -0.343 | -0.176    | 0.107  | -0.4      | -0.364 |
| A013835_01 | 0.163     | 0.122  | -0.577 | -0.29  | -0.234    | -0.051 | -0.561    | -0.317 |
| A013847_01 | 0.383     | 0.184  | 0.023  | -0.19  | 0.314 NA  |        | 0.141     | -0.008 |
| A013856_01 | 0.082     | 0.25   | 0.507  | 0.237  | 0.088     | 0.047  | -0.143 NA |        |
| A013857_01 | -0.145    | -0.058 | -0.191 | -0.012 | -0.027    | 0.115  | 0.016     | -0.055 |
| A013863_01 | -0.018    | -0.247 | 0.014  | 0.222  | 0.031     | -0.218 | 0.05      | -0.123 |
| A013872_01 | -0.658    | -0.736 | 0.611  | 0.647  | -0.703    | -1.344 | 0.45      | 0.118  |
| A013875_01 | 0.013     | -0.42  | -0.012 | -0.302 | 0.634     | 0.629  | -0.482    | -0.556 |
| A013876_01 | -0.218    | -0.147 | 0.065  | 0.516  | 0         | 0.136  | -0.182    | -0.034 |
| A013879_01 | -0.325    | -0.402 | -0.143 | 0.024  | 0.053     | 0.054  | -0.075    | -0.122 |
| A013880_01 | 0.899     | 0.823  | 0.342  | -0.53  | 0.475     | 0.558  | 0.135     | 0.101  |
| A013884_01 | 0.17      | 0.099  | 0.258  | 0.035  | 0.147     | 0.094  | 0.114     | 0.021  |
| A013887_01 | 0.542 NA  |        | 0.165  | 0.322  | 0.267 NA  |        | 0.318     | -0.01  |
| A013889_01 | 0.211     | 0.061  | -0.006 | -0.286 | 0.337     | 0.131  | -0.103    | -0.185 |
| A013896_01 | -0.027    | -0.262 | 0.018  | -0.568 | 0.216     | -0.117 | 0.035     | -0.045 |
| A013898_01 | -0.233    | -0.221 | 0.149  | -0.51  | 0.159     | 0.098  | 0.125     | 0.083  |
| A013901_01 | 0.155     | 0.235  | -0.176 | -0.064 | 0.09      | 0.148  | -0.004    | -0.076 |
| A013903_01 | 1.036     | 1.211  | 0.905  | 1.103  | -0.301    | -0.264 | 0.019     | 0.158  |
| A013904_01 | 0.014     | -0.123 | -0.21  | -0.181 | -0.21     | -0.369 | -0.212 NA |        |
| A013911_01 | 0.055     | 0.03   | 0.237  | 0.842  | -0.113    | -0.463 | -0.408 NA |        |
| A013912_01 | 0.161     | 0.067  | -0.044 | -0.203 | 0.201     | 0.189  | -0.036    | -0.07  |
| A013914_01 | -0.282    | -0.204 | -0.174 | 0.1    | -0.012    | -0.111 | -0.154    | -0.014 |
| A013931_01 | 0.139     | 0.051  | -0.106 | 0.22   | -0.158    | -0.097 | 0.113     | -0.034 |

|            |           |           |        |           |           |        |           |        |
|------------|-----------|-----------|--------|-----------|-----------|--------|-----------|--------|
| A013932_01 | 0.266     | 0.068     | -0.07  | 0.018     | 0.201     | 0.132  | 0.068     | 0.003  |
| A013942_01 | 0.761     | 0.667     | 0.776  | 0.626     | 0.227     | 0.43   | 0.318     | 0.19   |
| A013944_01 | -0.049    | -0.056    | 0.049  | -0.543    | 0.234     | 0.187  | 0.078     | 0.053  |
| A013945_01 | 0.02      | -0.061    | -0.156 | 0.227     | 0.098     | 0.038  | -0.163    | -0.118 |
| A013948_01 | -0.35     | -0.14     | -0.159 | 0.031     | 0.149     | 0.302  | 0.17      | 0.303  |
| A013950_01 | 0.426     | 0.182     | 0.275  | -0.224    | 0.096     | 0.215  | -0.001    | -0.143 |
| A013951_01 | -0.029    | -0.103    | -0.219 | -0.024    | 0.065     | 0.172  | 0.176     | 0.146  |
| A013956_01 | 0.046     | -0.166    | 0.077  | -0.058    | 0.19      | 0.107  | -0.06     | -0.124 |
| A013960_01 | -0.279    | -0.257    | -0.204 | -0.296    | -0.08     | 0.136  | -0.036    | -0.011 |
| A013971_01 | 0.192     | 0.34      | 0.218  | -0.812    | 0.266     | 0.23   | 0.144     | 0.08   |
| A013973_01 | 0.174     | 0.074     | 0.139  | 0.239     | 0.102     | -0.118 | 0.235     | 0.074  |
| A013974_01 | 0.726     | 0.669     | 0.494  | 0.294     | 0.461     | 0.593  | -0.025    | -0.095 |
| A013975_01 | 0.46      | 0.465     | 0.866  | 0.219     | 0.357     | 0.537  | 0.469     | 0.388  |
| A013980_01 | -0.255    | -0.293 NA |        | -0.586    | 0.169     | 0.014  | -0.071    | -0.358 |
| A013987_01 | -0.043    | 0.066     | -0.206 | -0.057    | 0.13      | 0.036  | -0.165    | -0.152 |
| A013989_01 | 0.575     | 0.369     | -0.021 | 0.246     | -0.11     | 0.109  | -0.371    | -0.309 |
| A013994_01 | -0.265    | -0.18     | 0.099  | -0.033    | 0.056     | 0.005  | 0.006     | 0.009  |
| A013995_01 | 1.177     | 1.076     | 1.16   | 0.865     | 0.311     | 0.642  | 0.377     | 0.267  |
| A013998_01 | 0.166     | 0.16      | 0.398  | 0.236     | 0.221     | 0.019  | 0.094     | -0.045 |
| A014000_01 | 0.342     | 0.431     | 0.03   | -0.847    | 0.232     | 0.568  | 0.31      | 0.199  |
| A014010_01 | 0.27      | 0.437     | 0.205  | -0.714    | 0.082     | 0.253  | 0.13      | 0.171  |
| A014014_01 | 0.18      | -0.032    | -0.025 | -0.561    | 0.25      | 0.209  | -0.195    | -0.246 |
| A014015_01 | 0.151 NA  |           | -0.459 | -0.159    | 0.23 NA   |        | -0.031    | -0.038 |
| A014016_01 | -0.357 NA | NA        |        | 0.416     | 0.089 NA  |        | 0.241     | 0.192  |
| A014017_01 | -2.001    | -2.333    | -1.981 | -2.118    | -1.72     | -2.082 | -1.491    | -1.116 |
| A014019_01 | -0.109 NA | NA        | NA     | NA        |           | 0.264  | 0.03      | 0.003  |
| A014020_01 | -0.109    | -0.117    | -0.037 | -0.398    | -0.003    | 0.029  | -0.016    | 0.081  |
| A014021_01 | -0.36 NA  |           | -1.413 | -1.819    | -0.429 NA |        | -1.371    | -1.064 |
| A014024_01 | 0.041     | -0.11     | 0.037  | 0.139     | 0.254     | 0.299  | 0.274     | 0.193  |
| A014025_01 | 0.354     | 0.074     | 0.121  | -0.25     | 0.45      | 0.379  | 0.165     | -0.099 |
| A014026_01 | 0.26      | 0.593     | -0.411 | -0.301    | -0.247    | 0.135  | -0.317    | -0.44  |
| A014027_01 | -0.336    | -0.06 NA  | NA     |           | 0.022     | 0.202  | 0.016     | 0.244  |
| A014031_01 | 0.106     | 0.061     | -0.169 | -0.255    | 0.259     | 0.207  | 0.075     | -0.068 |
| A014036_01 | -0.447    | -0.134    | -0.445 | 0.116     | -0.082    | -0.042 | -0.181    | 0.038  |
| A014038_01 | 0.485     | 0.648     | 0.171  | 0.275     | -0.075    | 0.207  | 0.044     | -0.017 |
| A014040_01 | -2.324    | -2.341    | -1.476 | -1.044    | -2.69     | -3.324 | -2.059    | -1.459 |
| A014043_01 | 0.667     | 0.353     | 0.075  | -0.123    | 0.042     | 0.121  | 0.225     | 0.073  |
| A014046_01 | -0.283    | -0.341    | -0.265 | -0.735    | 0.346     | 0.218  | -0.282    | -0.365 |
| A014056_01 | -0.204    | -0.156    | -0.305 | -1.222    | -0.09     | -0.027 | 0.069     | 0.034  |
| A014062_01 | 0.226     | 0.201     | 0.205  | 0.04      | 0.184     | 0.207  | 0.181     | 0.106  |
| A014064_01 | -0.233    | -0.212    | 0.069  | -0.199    | 0.014     | -0.204 | 0.198 NA  |        |
| A014066_01 | 0.345     | 0.338     | 0.924  | 0.778     | 0.222     | 0.176  | 0.38      | 0.221  |
| A014067_01 | 0.275     | 0.321     | -0.017 | 0.23      | 0.183     | 0.199  | -0.046    | -0.057 |
| A014068_01 | 1.243     | 0.909     | 1.462  | 1.448     | -0.296 NA |        | 0.341     | 0.043  |
| A014069_01 | -0.542    | -0.716    | 0.222  | 0.194     | -0.031    | -0.061 | 0.075     | 0.199  |
| A014072_01 | -0.091    | -0.262    | 0.139  | 0.195     | 0.021     | 0.063  | -0.059    | 0.007  |
| A014075_01 | 0.076     | 0.101     | 0.077  | 0.571     | 0.201     | -0.131 | 0.168     | 0.17   |
| A014083_01 | 0.527     | 0.377     | 0.054  | -0.093    | 0.212     | -0.002 | -0.137    | -0.33  |
| A014084_01 | 0.206     | 0.242     | 0.077  | -0.869    | -0.068    | 0.201  | 0.017     | 0.023  |
| A014085_01 | 0.023     | -0.047    | 0.48   | 0.307     | -0.013 NA |        | -0.056 NA |        |
| A014086_01 | -0.004    | -0.026    | -0.024 | 0.203     | -0.674 NA |        | -0.695    | -0.679 |
| A014088_01 | 0.236     | 0.26      | 0.274  | 0.356     | -0.075    | 0.089  | 0.101     | 0.028  |
| A014089_01 | 0.392     | 0.376     | 0.125  | -0.159    | 0.35      | 0.442  | 0.306     | 0.1    |
| A014095_01 | 0.144     | 0.208     | 0.434  | 0.037     | -0.026    | -0.134 | 0.111 NA  |        |
| A014097_01 | -0.059    | -0.461    | -0.162 | -0.458    | -0.041    | 0.171  | -0.177    | -0.211 |
| A014098_01 | 0.156     | 0.056     | -0.05  | 0.316     | 0.122     | 0.099  | 0.208     | 0.08   |
| A014109_01 | 0.786     | 0.853     | 0.15   | -0.025    | 0.052     | 0.411  | 0.063     | 0.014  |
| A014112_01 | -0.039 NA |           | 0.065  | -0.183    | 0.056 NA  |        | 0.219 NA  |        |
| A014113_01 | -0.03     | -0.049    | 0.027  | 0.277     | 0.068     | -0.08  | -0.003    | -0.148 |
| A014115_01 | 0.74      | 0.669     | 0.648  | 0.611     | 0.757     | 1.031  | 0.56      | 0.322  |
| A014117_01 | 0.178 NA  |           | -0.284 | -0.238 NA | NA        |        | 0.003     | -0.078 |
| A014119_01 | -0.354    | -0.203    | -0.056 | 0.03      | -0.071    | -0.008 | 0.234     | 0.135  |
| A014121_01 | -0.761    | -0.665    | 0.639  | 0.398     | 0.182     | 0.41   | 0.871     | 0.677  |
| A014124_01 | -0.016    | -0.051    | -0.267 | -0.447    | 0.101     | 0.207  | -0.126    | -0.112 |
| A014126_01 | 0.435     | 0.069     | -0.046 | 0.021     | 0.125     | 0.131  | 0.06      | 0.046  |
| A014130_01 | 0.067     | -0.161    | 0.382  | 0.381     | -0.083    | -0.313 | -0.314    | -0.302 |
| A014131_01 | -0.974    | -0.823    | 0.549  | 0.527     | -0.803    | -0.904 | -0.286    | -0.262 |
| A014132_01 | -0.083    | -0.238    | -0.384 | -0.337    | 0.141     | -0.08  | 0.038     | -0.007 |

|            |           |           |        |        |           |           |           |        |
|------------|-----------|-----------|--------|--------|-----------|-----------|-----------|--------|
| A014136_01 | 0.352     | 0.127     | 0.073  | 0.004  | -0.253    | -0.248    | -0.161    | -0.116 |
| A014137_01 | 0.026     | 0.056     | -0.332 | -0.5   | -0.033    | 0.081     | -0.047 NA |        |
| A014139_01 | 0.21      | 0.038     | 0.307  | 0.092  | -0.219    | -0.349    | -0.128    | -0.238 |
| A014140_01 | -0.065    | -0.259    | -0.543 | -0.229 | -0.095    | -0.113    | -0.08     | -0.105 |
| A014141_01 | -0.39 NA  |           | 0.264  | 0.14   | -0.417 NA |           | 0.202     | 0.109  |
| A014144_01 | 0.481     | 0.237     | -0.279 | -0.054 | 0.135     | 0.407     | -0.009    | 0.022  |
| A014146_01 | -0.418    | -0.287    | -0.166 | 0.339  | -0.143    | -0.347    | -0.144    | -0.153 |
| A014147_01 | 0.854     | 0.608     | 0.592  | -0.037 | 0.421     | 0.574     | 0.192     | 0.076  |
| A014155_01 | 0.063     | 0.217     | -0.283 | -0.202 | 0.299     | 0.338     | 0.123 NA  |        |
| A014161_01 | 0.452     | 0.363     | 0.709  | -0.014 | 0.437     | 0.578     | 0.201     | 0.041  |
| A014163_01 | 0.354     | 0.05      | -0.121 | 0.461  | -0.165 NA |           | -0.1      | -0.359 |
| A014165_01 | 0.151     | 0.26      | 0.435  | -0.096 | 0.03      | 0.227     | 0.236 NA  |        |
| A014167_01 | 0.198 NA  |           | -0.312 | -0.416 | -0.065 NA |           | -0.068    | 0.039  |
| A014168_01 | -0.66     | -0.578    | -0.435 | -0.037 | -0.406    | -0.261    | -0.028    | 0.049  |
| A014169_01 | 0.98      | 1.013     | 1.068  | 0.993  | 0.201     | 0.135     | -0.221    | -0.091 |
| A014174_01 | -0.141    | -0.373    | 0.067  | -0.294 | 0.187     | 0.008     | 0.343     | 0.168  |
| A014176_01 | -0.045    | -0.113    | -0.255 | -0.023 | 0.182     | -0.008    | -0.063    | -0.194 |
| A014177_01 | 0.056     | -0.068    | 0.151  | 0.347  | 0.016     | 0.004     | 0.058     | 0.045  |
| A014178_01 | 0.27      | 0.255     | -0.19  | 0.195  | 0.141 NA  |           | 0.094 NA  |        |
| A014179_01 | 0.724     | 0.449     | 0.155  | -0.195 | 0.404     | 0.096     | 0.131     | -0.234 |
| A014180_01 | 0.406     | 0.164     | -0.148 | -0.356 | 0.391     | 0.645     | -0.234    | -0.26  |
| A014182_01 | -0.257    | -0.242    | 0.213  | 0.199  | -0.461    | -0.419    | 0.012     | -0.072 |
| A014185_01 | -0.056    | -0.206    | -0.046 | 0.224  | 0.198     | -0.042    | 0.113     | 0.054  |
| A014186_01 | 1.153     | 1.094     | 0.596  | 0.302  | -0.003    | 0.155     | 0.451     | 0.321  |
| A014188_01 | -0.414    | -0.563 NA |        | -0.302 | -0.031    | -0.297    | -0.091 NA |        |
| A014189_01 | -0.707    | -0.903    | -0.371 | -0.467 | -0.519    | -1.044    | -0.082    | -0.218 |
| A014192_01 | 0.49      | 0.218     | 0.18   | -0.226 | 0.205     | 0.239     | 0.015     | -0.056 |
| A014194_01 | -0.304    | -0.441    | -0.087 | -0.425 | 0.042     | -0.118    | 0.077     | -0.086 |
| A014201_01 | -0.005    | 0.071     | 0.115  | 0.354  | -0.205    | 0.055     | -0.018    | -0.116 |
| A014202_01 | 0.324     | 0.154     | 0.368  | 0.208  | 0.055     | -0.024    | 0.06      | -0.044 |
| A014203_01 | 0.22      | 0.196     | 0.472  | 0.123  | -0.093    | -0.361    | -0.07     | -0.166 |
| A014204_01 | 0.641     | 0.448     | -0.169 | 0.127  | -0.08     | 0.061     | -0.153    | -0.16  |
| A014205_01 | 0.077     | 0.049     | -0.193 | 0.279  | 0.136     | 0.194     | 0.487     | 0.429  |
| A014208_01 | -0.239    | 0.042     | -0.334 | 0.021  | -0.044    | -0.398    | -0.082 NA |        |
| A014209_01 | 0.418     | 0.336     | 0.748  | 0.271  | 0.278     | 0.171     | 0.546     | 0.227  |
| A014210_01 | -0.026    | -0.409    | 0.038  | -0.097 | -0.722    | -1.148    | -0.266    | -0.363 |
| A014213_01 | 0.196     | 0.079     | -0.226 | 0.16   | -0.161    | -0.07     | -0.423    | -0.232 |
| A014224_01 | -1.022    | -0.883    | -0.353 | -0.393 | -0.165    | -0.041    | -0.073    | 0.028  |
| A014229_01 | 0.782     | 0.616     | 0.101  | -0.125 | 0.052     | 0.606     | 0.117     | 0      |
| A014233_01 | -0.671    | -0.918    | 0.113  | -0.212 | -0.558    | -0.764    | -0.024    | 0.101  |
| A014239_01 | 0.392     | 0.33      | 0.102  | 0.261  | -0.039    | -0.206    | -0.312    | -0.304 |
| A014245_01 | 0.208     | -0.072    | 0.193  | -0.001 | 0.097     | -0.154    | 0.054     | -0.149 |
| A014247_01 | -1.071    | -1.619 NA |        | -0.582 | -1.46 NA  | NA        | NA        |        |
| A014248_01 | -0.295    | -0.498    | -0.237 | 0.459  | -0.052    | -0.043    | -0.097    | -0.144 |
| A014249_01 | -0.334    | -0.456    | -0.564 | 0.141  | 0.031     | 0.068     | -0.157    | -0.046 |
| A014250_01 | -0.182    | -0.44     | -0.173 | -0.447 | -0.115    | -0.049    | -0.138    | -0.17  |
| A014253_01 | 0.108     | 0.207     | -0.473 | -0.516 | 0.141     | 0.265     | -0.239    | -0.227 |
| A014256_01 | 0.289     | 0.393     | 0.08   | -0.144 | -0.056    | 0.231     | -0.068    | -0.038 |
| A014257_01 | -0.282    | -0.377    | -0.267 | -0.061 | 0.116     | -0.234    | 0.096     | -0.07  |
| A014264_01 | -0.032    | 0.059     | 0.208  | -0.115 | 0.157     | -0.038    | 0.078     | -0.182 |
| A014270_01 | -0.116    | -0.396    | -0.021 | 0.178  | 0.087     | -0.168    | -0.049    | -0.377 |
| A014274_01 | -0.543    | -0.542    | -0.328 | -0.666 | 0.08      | 0.145     | 0.138     | 0.205  |
| A014275_01 | -2.314    | -2.487    | -1.394 | -0.521 | -2.273    | -2.894 NA |           | -3.01  |
| A014276_01 | 0.29      | 0.202     | 0.228  | -0.058 | 0.29      | 0.369     | 0.179     | 0.107  |
| A014278_01 | 0.678     | 0.499     | 0.088  | 0.053  | 0.061     | 0.313     | -0.016    | -0.113 |
| A014286_01 | 0.086     | 0.387     | 0.341  | 0.175  | -0.003    | 0.011     | -0.001    | 0.037  |
| A014293_01 | 0.574     | 0.262     | -0.012 | 0.16   | 0.671 NA  |           | 0.725     | 0.295  |
| A014295_01 | 0.421     | 0.053     | 0.226  | -0.367 | 0.121     | 0.446     | 0.259     | 0.144  |
| A014304_01 | -1.342 NA |           | -1.105 | -0.984 | -0.132    | -0.151    | 0.321     | 0.259  |
| A014305_01 | 0.296     | 0.07      | 0.074  | -0.181 | 0.02      | 0.229     | 0.091     | 0.176  |
| A014307_01 | 0.063     | -0.02     | -0.1   | -0.12  | -0.267    | -0.607    | 0.162     | -0.095 |
| A014310_01 | 0.559     | 0.505     | 1.073  | 0.487  | 0.251     | 0.046     | 0.724     | 0.537  |
| A014313_01 | 0.189     | 0.294     | -0.211 | -0.251 | 0.191     | 0.16      | -0.199    | -0.179 |
| A014317_01 | 0.068     | -0.086    | -0.027 | 0.256  | 0.304     | 0.09      | -0.198    | -0.384 |
| A014319_01 | -0.446    | -0.202    | 0.269  | -0.139 | -0.117    | -0.155    | -0.105    | -0.016 |
| A014323_01 | 0.252     | 0.101     | 0.731  | 0.245  | 0.002     | -0.207    | -0.178    | -0.24  |
| A014325_01 | -0.165    | -0.478    | 0.25   | -0.064 | 0.108     | 0.014     | 0.47      | 0.296  |
| A014331_01 | 0.156     | -0.048    | -0.008 | 0.06   | 0         | -0.267    | 0.01 NA   |        |

|            |          |          |           |        |           |          |           |        |
|------------|----------|----------|-----------|--------|-----------|----------|-----------|--------|
| A014339_01 | -0.073   | -0.164   | 0.294     | 0.282  | -0.064    | -0.338   | 0.161     | -0.071 |
| A014344_01 | 0.058    | -0.004   | -0.207    | -0.084 | 0.056     | 0.183    | -0.076    | 0.042  |
| A014441_01 | 0.144 NA |          | 0.24      | -0.505 | 0.322 NA  |          | 0.105     | -0.095 |
| A014442_01 | -0.421   | -0.337   | 0.133     | 0.216  | 0.112     | -0.168   | 0.273     | 0.237  |
| A014443_01 | 0.445    | 0.28     | 0.272     | -0.06  | 0.379     | 0.319    | -0.084    | -0.236 |
| A014448_01 | 0.273    | 0.531    | 0.223     | -0.605 | 0.299     | 0.245    | 0.002     | 0.022  |
| A014449_01 | -0.133   | -0.301   | -0.372    | 0.069  | -0.05     | -0.044   | -0.198    | -0.126 |
| A014455_01 | 0.715    | 0.705    | 0.249     | 0.134  | 0.666     | 0.673    | 0.449     | 0.295  |
| A014457_01 | 0.31     | 0.373    | -0.081    | 0.282  | -0.041 NA |          | -0.029    | -0.056 |
| A014459_01 | 0.422    | 0.334    | -0.142    | -0.765 | 0.24      | 0.224    | 0.263     | -0.032 |
| A014462_01 | 0.215    | 0.13     | -0.079    | -0.013 | 0.12      | -0.066   | 0.041     | 0.033  |
| A014463_01 | -0.105   | -0.079   | -0.043    | 0.115  | 0.068     | 0.101    | -0.071    | -0.039 |
| A014464_01 | -0.884   | -0.719   | -0.367    | 0.483  | -1.829    | -2.301   | -1.647    | -1.247 |
| A014468_01 | -0.046   | -0.134   | -0.475    | -0.865 | 0.233     | -0.091   | -0.148    | -0.236 |
| A014469_01 | -0.488   | -0.45    | -0.156    | -0.51  | 0.15      | 0.03     | 0.168     | -0.02  |
| A014472_01 | 0.347    | 0.206    | 0.187     | 0.035  | 0.338     | 0.246    | 0.226     | -0.099 |
| A014473_01 | -0.052   | -0.232   | -0.369    | -0.21  | 0.19      | 0.002    | -0.156    | -0.067 |
| A014474_01 | -0.321   | -0.177   | 0.139     | -0.273 | 0.128     | 0.059    | 0.395     | 0.201  |
| A014486_01 | -0.219   | -0.292   | -0.098    | 0.072  | -0.207    | -0.248   | -0.076 NA |        |
| A014493_01 | 0.632    | -0.052   | -0.194    | -0.234 | 0.294     | 0.03     | 0.184     | 0.206  |
| A014495_01 | 0.261    | 0.2      | 0.179     | -0.087 | 0.263     | 0        | -0.02     | -0.122 |
| A014497_01 | -0.574   | -0.23    | -0.101    | 0.412  | 0.054     | -0.078   | -0.049    | -0.025 |
| A014501_01 | -0.189   | -0.333   | -0.294    | -0.147 | -0.234    | -0.197   | -0.258    | -0.214 |
| A014502_01 | -0.329   | -0.296   | -0.514    | -0.226 | -0.086    | -0.222   | -0.098    | 0.022  |
| A014503_01 | 0.061    | 0.001    | -0.981    | -0.303 | 0.186     | 0.26     | 0.082 NA  |        |
| A014509_01 | 0.122    | 0.112    | -0.343 NA |        | 0.252     | 0.392    | -0.005 NA |        |
| A014510_01 | -0.099   | 0.288    | -0.174    | -0.057 | 0.139     | 0.322    | -0.148    | 0.023  |
| A014514_01 | 0.295    | 0.08     | 0.014     | 0.189  | 0.201     | -0.031   | 0.185     | -0.006 |
| A014516_01 | 0.503    | 0.521    | 0.232     | -0.424 | 0.362     | 0.262    | 0.124     | 0.139  |
| A014519_01 | -0.532   | -0.374   | -0.503    | -0.405 | 0.537     | 0.683    | -0.584    | -0.303 |
| A014520_01 | -0.624   | -0.67 NA | NA        |        | -0.283    | -0.34    | -0.079 NA |        |
| A014522_01 | 0.093    | 0.085    | -0.263    | -0.275 | 0.075     | 0.228    | -0.302    | -0.226 |
| A014526_01 | 1.13     | 1.123    | 1.217     | 1.463  | 0.504     | 0.996    | 0.198     | 0.147  |
| A014529_01 | 0.35 NA  |          | 0.25      | -0.033 | 0.325 NA  |          | 0.236 NA  |        |
| A014531_01 | -0.105   | -0.095   | -0.203    | 0.226  | -0.097    | -0.055   | -0.069    | -0.144 |
| A014532_01 | 0.278    | 0.21     | 0.116     | -0.998 | 0.072     | 0.074    | 0.283     | 0.126  |
| A014537_01 | -0.101   | -0.114   | -0.352    | -0.605 | 0.125     | -0.168   | 0.043     | 0.065  |
| A014539_01 | 0.608    | 0.519    | -0.049    | -0.08  | 0.083     | -0.282   | -0.338    | -0.53  |
| A014543_01 | -0.085   | 0.012    | -0.015    | 0.197  | -0.08     | -0.326   | -0.246    | -0.173 |
| A014544_01 | -0.477   | -0.469   | -0.387    | -0.576 | -0.186    | -0.432   | -0.336    | -0.233 |
| A014548_01 | 0.266    | 0.091    | 0.177     | -0.345 | 0.245     | 0.232    | 0.291     | 0.053  |
| A014550_01 | -0.005   | -0.063   | 0.142     | 0.12   | 0.165     | 0.079    | -0.094    | 0.003  |
| A014556_01 | -0.195   | -0.023   | 0.035 NA  |        | 0.043     | -0.352   | -0.139 NA |        |
| A014560_01 | -0.072   | -0.433   | 0.22      | 0.008  | 0.081     | -0.349   | 0.249     | -0.222 |
| A014570_01 | 0.409    | 0.402    | 0.279     | -0.031 | 0.267     | 0.091    | 0.181     | 0.253  |
| A014571_01 | -0.887   | -0.588   | -0.319    | -0.124 | -0.468    | -0.298   | 0.042     | 0.112  |
| A014574_01 | 0.042    | 0.398    | 0.222     | -0.493 | 0.092     | 0.325    | 0.05      | 0.041  |
| A014576_01 | 0.239    | 0.181    | 0.251     | -0.233 | 0.372     | 0.459    | 0.507     | 0.259  |
| A014577_01 | -0.584   | -0.451   | -0.315    | -0.174 | -0.693    | -0.9     | -0.413    | -0.307 |
| A014580_01 | 0.136    | 0.067    | -0.173    | -0.204 | 0.073     | -0.024   | -0.063    | -0.105 |
| A014581_01 | -1.429   | -1.471   | -1.121    | -0.853 | -0.817    | -0.671   | -0.451    | -0.383 |
| A014587_01 | -0.594   | -0.423   | -0.542    | -0.177 | -0.19     | -0.139   | -0.141    | 0.097  |
| A014590_01 | 0.082    | 0.045    | 0.016     | -0.453 | 0.141     | -0.055   | 0.006     | -0.044 |
| A014594_01 | -0.169   | -0.29    | 0.407     | -0.2   | -0.084    | -0.036   | 0.179     | 0.17   |
| A014596_01 | 0.574    | 0.585    | -0.211    | 0.035  | 0.272     | 0.246    | 0.177     | 0.106  |
| A014597_01 | 0.464    | 0.337    | -0.088    | -0.147 | 0.288     | 0.476    | 0.067     | -0.101 |
| A014600_01 | 0.509    | 0.443 NA |           | -0.074 | 0.258     | 0.327 NA |           | -0.018 |
| A014601_01 | 0.343    | 0.289    | -0.582    | -0.41  | 0.153     | 0.412    | -0.209    | -0.117 |
| A014611_01 | -1.425   | -2.063   | -0.539    | -1.026 | -0.581    | -0.761   | -0.457    | -0.548 |
| A014612_01 | -0.41    | -0.627   | -0.078    | -0.215 | -0.235    | -0.269   | 0.146     | 0.212  |
| A014615_01 | 0.061    | 0.191    | -0.144    | 0.018  | -0.192    | -0.286   | -0.23     | -0.078 |
| A014621_01 | 0.777    | 0.741    | 0.246     | 0.662  | 0.51      | 0.27     | 0.199     | 0.037  |
| A014622_01 | -0.279   | -0.351   | -0.707    | -0.477 | 0.158     | 0.155    | 0.134     | -0.151 |
| A014628_01 | 0.288    | 0.256    | 0.351     | -0.086 | 0.107     | 0.07     | 0.145     | 0.042  |
| A014629_01 | 0.773    | 0.386    | 0.738     | -0.018 | 0.421     | 0.344    | 0.135     | -0.273 |
| A014632_01 | 0.519    | 0.385    | -0.017    | 0.2    | -0.148    | -0.031   | -0.315    | -0.002 |
| A014633_01 | -0.333   | -0.395   | 0.293     | -0.22  | 0.113     | -0.273   | 0.519     | 0.312  |
| A014634_01 | -0.797   | -0.896   | -0.46     | 0.309  | -0.246    | -0.521   | 0.054     | -0.014 |

|            |        |           |           |          |        |           |           |        |
|------------|--------|-----------|-----------|----------|--------|-----------|-----------|--------|
| A014636_01 | -0.183 | 0.1       | 0.375     | 0.028    | 0.268  | 0.122     | -0.163    | -0.08  |
| A014637_01 | 0.281  | 0.166     | 0.25      | -0.163   | 0.625  | 0.381     | 0.403     | 0.217  |
| A014639_01 | -0.04  | 0.061     | 0.215     | 0.261    | 0.007  | -0.033    | -0.131    | -0.248 |
| A014643_01 | 0.538  | 0.337     | 0.648     | 0.395    | 0.733  | 0.694     | 0.045     | 0.087  |
| A014644_01 | 0.37   | 0.21      | 0.057     | 0.075    | -0.015 | 0.033     | -0.259    | -0.137 |
| A014646_01 | 0.062  | -0.126    | -0.07     | -0.464   | 0.001  | 0.127     | -0.145    | 0.029  |
| A014650_01 | -0.106 | -0.013    | 0.034     | -0.477   | 0.035  | -0.067    | -0.024    | 0.02   |
| A014654_01 | -0.077 | -0.081    | 0.03      | 0.048    | 0.292  | 0.156     | -0.053    | -0.049 |
| A014655_01 | 0.278  | -0.046    | 0.095     | 0.217    | 0.042  | -0.222    | -0.029    | -0.105 |
| A014660_01 | -0.604 | -0.422 NA | NA        |          | 0.203  | -0.369 NA |           | -0.188 |
| A014661_01 | -0.532 | -0.78     | -0.29     | 0.364    | -0.042 | -0.294    | -0.001    | -0.193 |
| A014662_01 | 0.287  | 0.21      | 0.183     | 0.276    | 0.135  | 0.161     | 0.193     | -0.017 |
| A014667_01 | -0.738 | -0.828    | -0.483    | -0.493   | -0.173 | -0.229    | -0.326    | -0.081 |
| A014669_01 | -0.353 | -0.196    | 0.17      | -0.124   | -0.123 | -0.041    | 0.017     | 0.066  |
| A014675_01 | 0.042  | 0.017     | -0.138    | 0.112    | 0.281  | 0.093     | -0.129    | -0.096 |
| A014676_01 | 0.537  | 0.499     | -0.281    | -0.085   | 0.202  | 0.104     | -0.103    | -0.254 |
| A014677_01 | 0.595  | 0.597     | 0.092     | -0.027   | 0.409  | 0.438     | 0.095 NA  |        |
| A014682_01 | 0.327  | 0.195     | -0.671    | -0.147   | -0.11  | 0.153     | -0.202    | -0.059 |
| A014684_01 | 0.467  | 0.365     | 0.278     | -0.385   | 0.234  | 0.247     | -0.002    | 0.022  |
| A014685_01 | 0.089  | 0.029     | 0.068     | -0.073   | 0.145  | -0.187    | 0.124     | 0.065  |
| A014688_01 | 0.937  | 1.124     | 0.565     | 0.576    | 0.413  | 1.143     | 0.758     | 0.811  |
| A014699_01 | 0.357  | 0.337     | 0.49      | -0.551   | 0.562  | 0.557     | 0.054     | 0      |
| A014701_01 | -0.06  | 0.179     | 0.048     | -0.145   | -0.334 | 0.471     | 0.168     | 0.403  |
| A014702_01 | -0.164 | -0.355    | -0.126    | -0.536   | 0.193  | 0.101     | 0.498     | 0.367  |
| A014704_01 | 1.067  | 0.874     | -0.034    | -0.151   | -0.186 | 0.266     | -0.108    | -0.151 |
| A014705_01 | -0.424 | -0.696    | -0.584    | -0.549   | -0.141 | -0.199    | -0.443    | -0.429 |
| A014706_01 | 0.058  | -0.087    | -0.35     | -0.222   | 0.138  | -0.163    | -0.051    | -0.084 |
| A014707_01 | 0.449  | 0.588     | 0.09      | 0.221    | -0.077 | -0.007    | 0.041     | -0.146 |
| A014708_01 | -0.065 | -0.194    | 0.256     | -0.356   | 0.273  | 0.097     | 0.251     | -0.099 |
| A014709_01 | -0.289 | -0.238    | -0.306    | -0.607   | -0.116 | -0.287    | -0.611    | -0.446 |
| A014716_01 | 0.052  | -0.058    | -0.054    | -0.183   | -0.17  | -0.166    | -0.335    | -0.257 |
| A014717_01 | -0.445 | -0.408    | -0.209    | 0.065    | -0.206 | -0.163    | -0.239    | -0.175 |
| A014720_01 | -0.836 | -1.164    | -0.617    | -0.365   | -0.148 | -0.555    | -0.296    | -0.203 |
| A014721_01 | -0.305 | -0.407    | -0.172    | 0.183    | -0.226 | -0.338    | -0.017    | -0.143 |
| A014722_01 | 0.351  | 0.159     | -0.173    | -0.198   | 0      | 0.31      | -0.006    | 0.109  |
| A014723_01 | -0.441 | -0.45     | -0.185    | -0.29    | 0.021  | -0.061    | 0.096     | 0.074  |
| A014724_01 | -1.325 | -1.627    | -0.441 NA |          | -0.486 | -0.479    | 0.309     | 0.151  |
| A014725_01 | 0.914  | 0.571     | 0.185     | 0.151    | -0.095 | 0.41      | 0.32      | 0.246  |
| A014726_01 | -1.996 | 0.091     | 0.237 NA  |          | -1.592 | 0.168     | 0.068 NA  |        |
| A014728_01 | -0.271 | -0.262    | -0.232    | -0.378   | -0.144 | -0.126    | -0.189    | -0.156 |
| A014730_01 | -0.003 | -0.059    | 0.178     | -0.022   | -0.019 | -0.168    | 0.129     | -0.031 |
| A014732_01 | 0.292  | 0.084     | 0.166     | 0.532    | 0.224  | -0.069    | -0.054 NA |        |
| A014733_01 | 0.278  | 0.073     | 0.16      | -0.474   | -0.036 | 0.189     | 0.178     | 0.085  |
| A014738_01 | -0.069 | -0.116    | 0.025     | -0.008   | 0.135  | 0.108     | 0.013     | 0.071  |
| A014742_01 | 0.666  | 0.496     | 0.238     | -0.055   | -0.144 | 0.068     | -0.025    | -0.027 |
| A014743_01 | 0.458  | 0.412     | 0.336     | -0.426   | 0.208  | 0.328     | 0.27      | 0.145  |
| A014745_01 | 0.231  | 0.3       | -0.005    | -0.056   | 0.183  | 0.197     | -0.082    | 0.001  |
| A014746_01 | -1.67  | -1.212    | -0.257    | -0.377   | -0.5   | -0.203    | 0.083     | 0.337  |
| A014750_01 | -0.029 | -0.061    | -0.054    | -0.189   | -0.274 | -0.604    | -0.197    | -0.013 |
| A014751_01 | 0.464  | 0.241     | 0.228     | 0.186 NA | NA     |           | 0.188     | 0.06   |
| A014752_01 | 0.524  | 0.314     | -0.051    | -0.354   | 0.502  | 0.573     | 0.165     | 0.058  |
| A014754_01 | 0.247  | 0.197     | -0.048    | 0.017    | 0.125  | 0.204     | 0.135     | 0.121  |
| A014755_01 | 0.022  | 0.221     | -0.315    | -0.268   | -0.004 | 0.146     | -0.252    | -0.154 |
| A014758_01 | 0.591  | 0.683     | 0.593     | 0.806    | 0.567  | 0.804     | 0.122     | 0.198  |
| A014759_01 | -1.168 | -1.179    | -0.538    | -0.619   | -0.363 | -0.481    | 0.139     | 0.258  |
| A014760_01 | 0.612  | 0.6       | -0.014    | -0.35    | 0.132  | 0.303     | -0.023    | -0.28  |
| A014761_01 | 0.012  | -0.003    | 0.072     | -0.598   | 0.073  | -0.173    | -0.263    | -0.246 |
| A014762_01 | 0.357  | 0.304     | 0.22      | -0.097   | 0.115  | -0.017    | -0.051    | -0.023 |
| A014763_01 | 0.293  | 0.157     | -0.099    | -0.098   | 0.192  | 0.499     | 0.102     | 0.041  |
| A014765_01 | -0.084 | -0.148    | -0.054    | -0.098   | 0.131  | 0.132     | -0.222    | -0.344 |
| A014767_01 | 0.484  | 0.619     | -0.108    | -0.408   | 0.187  | 0.515     | 0.148     | 0.13   |
| A014769_01 | 0.168  | 0.087     | -0.065    | 0.108    | 0.393  | 0.395     | -0.136    | -0.094 |
| A014771_01 | 0.304  | 0.144     | -0.134    | 0.216    | 0.062  | -0.167    | -0.279    | -0.302 |
| A014774_01 | -0.41  | -0.289    | -0.092    | 0.039    | 0.011  | -0.107    | -0.136    | -0.201 |
| A014777_01 | -0.044 | 0.188     | -0.111    | 0        | -0.161 | 0.144     | -0.249    | -0.053 |
| A014780_01 | -0.1   | -0.162    | 0.311     | -0.027   | -0.013 | -0.222    | -0.08     | -0.143 |
| A014783_01 | 0.393  | 0.15      | -0.144    | -0.764   | 0.179  | 0.097     | -0.233    | -0.309 |
| A014785_01 | 0.523  | 0.46      | 0.14      | 0.197    | -0.02  | 0.089     | -0.163    | -0.039 |

|            |           |           |         |        |           |           |           |        |
|------------|-----------|-----------|---------|--------|-----------|-----------|-----------|--------|
| A014789_01 | -0.054    | -0.718    | 0.513   | 0.15   | 0.375     | 0.468     | 0.243     | 0.48   |
| A014793_01 | 0.601     | 0.397     | 0.574   | -0.285 | 0.293     | 0.502     | 0.324     | 0.375  |
| A014794_01 | 0.274     | 0.084     | 0.032   | -0.291 | 0.361     | 0.207     | 0.604     | 0.298  |
| A014798_01 | 0.28      | 0.324     | 0.1     | 0.432  | 0.182     | 0.441     | -0.207    | -0.112 |
| A014799_01 | -1.67     | -1.73     | -1.095  | -0.458 | -2.416    | -2.964 NA |           | -2.02  |
| A014800_01 | 0.246     | 0.109     | 0.13    | -0.116 | 0.18      | 0.015     | 0.034     | -0.072 |
| A014801_01 | 0.578     | 0.599     | 0.425   | 0.66   | 0.348     | 0.662     | 0.595     | 0.441  |
| A014802_01 | 0.292     | 0.39      | 0.483   | 0.436  | 0.251     | 0.17      | 0.19 NA   |        |
| A014805_01 | 0.791     | 0.686     | 0.269   | -0.428 | 0.13      | 0.658     | 0.162     | 0.112  |
| A014806_01 | 0.62      | 0.506     | 0.117   | 0.14   | 0.043     | -0.046    | 0.038     | -0.165 |
| A014811_01 | -0.01     | 0.151 NA  |         | NA     | 0.355     | 0.413     | 0.064     | 0.167  |
| A014819_01 | 0.179     | 0.188     | -0.076  | 0.386  | 0.193     | 0.065     | -0.024    | -0.209 |
| A014821_01 | 0.295     | 0.159     | 0.337   | 0.024  | 0.206     | 0.246     | 0.132     | 0.009  |
| A014825_01 | 0.476     | 0.428     | 0.645   | 0.844  | 0.191 NA  |           | 0.495     | 0.611  |
| A014832_01 | 0.12      | -0.012    | -0.085  | 0.049  | 0.137     | 0.075     | 0.232     | 0.255  |
| A014833_01 | -0.153 NA |           | -0.121  | -0.751 | 0.13 NA   |           | 0.068     | 0.116  |
| A014835_01 | -0.032    | -0.084    | 0.135   | 0.049  | 0.153     | 0.089     | -0.034    | -0.067 |
| A014838_01 | -0.204    | -0.115    | -0.18   | -0.153 | -0.182    | -0.346    | -0.257    | -0.273 |
| A014842_01 | -0.25     | -0.14     | -0.159  | 0.166  | -0.176    | -0.27     | 0         | 0.07   |
| A014848_01 | 0.364     | 0.146     | 0.384   | -0.123 | 0.174     | 0.121     | 0.156     | -0.046 |
| A014850_01 | 0.001     | 0.017     | 0.007   | -0.201 | 0.077     | 0.022     | -0.017    | -0.079 |
| A014851_01 | 0.011 NA  |           | 0.737   | 0.076  | -0.29 NA  |           | 0.841     | 0.629  |
| A014855_01 | 0.144     | 0.157     | 0.778   | 0.432  | 0.743     | 0.854     | 0.439     | 0.121  |
| A014858_01 | -0.093    | -0.282    | -0.437  | 0.004  | 0.171     | 0.279     | 0.15      | 0.067  |
| A014860_01 | -0.042    | 0.246     | -0.449  | -0.482 | 0.15      | 0.311     | -0.412    | -0.334 |
| A014862_01 | -0.201    | -0.062    | -0.289  | -0.205 | 0.115     | -0.077    | -0.024    | -0.045 |
| A014867_01 | 1.098     | 0.961     | 1.685   | 1.878  | 0.774     | 0.844     | -0.121 NA |        |
| A014874_01 | 0.113     | 0.329     | -0.003  | 0.076  | 0.254     | 0.541     | -0.363    | -0.395 |
| A014875_01 | 0.049 NA  |           | -0.196  | 0.564  | 0.218 NA  |           | 0.071     | 0.177  |
| A014876_01 | -1.515    | -1.932    | -0.98   | -1.087 | -0.536    | -0.839    | -0.249    | -0.415 |
| A014888_01 | 0.12      | 0.181     | 0.104   | 0.161  | 0.005     | 0         | -0.166    | -0.109 |
| A014892_01 | -0.063 NA |           | -0.069  | -0.697 | 0.367     | 0.231     | 0.161     | 0.005  |
| A014899_01 | -0.307    | -0.322    | -0.213  | -0.24  | -0.06     | -0.05     | 0.042     | 0.157  |
| A014904_01 | 0.048     | -0.01     | 0.316   | 0.086  | 0.029     | -0.033    | 0.01      | 0      |
| A014914_01 | 0.376     | 0.315     | 0.212   | 0.465  | 0.212     | 0.208     | 0.297     | 0.172  |
| A014915_01 | 0.185 NA  |           | -0.035  | 0.153  | -0.036 NA |           | 0.11      | -0.056 |
| A014919_01 | 0.617     | 0.563     | 0.551   | 0.135  | 0.364     | 0.462     | 0.068     | 0.004  |
| A014925_01 | -0.007    | -0.108    | 0.209   | 0.325  | 0.053     | -0.172    | 0.188     | 0.022  |
| A014927_01 | -0.073    | -0.528    | -0.86   | -0.708 | -0.012    | -0.144    | -0.554    | -0.528 |
| A014928_01 | 0.033     | 0.005     | -0.252  | -0.072 | 0.33      | 0.361     | -0.457    | -0.455 |
| A014929_01 | -0.604    | -0.714    | -0.217  | -0.441 | -0.289    | -0.282    | 0.146     | 0.14   |
| A014931_01 | -0.192    | -0.207    | -0.072  | -0.199 | -0.029    | -0.047    | 0.036     | 0.067  |
| A014932_01 | 0.311     | 0.096     | -0.12   | 0.018  | 0.098     | 0.398     | 0.096     | 0.161  |
| A014933_01 | 0.122     | 0.096     | -0.366  | -0.057 | -0.058    | -0.089    | -0.106    | -0.116 |
| A014935_01 | -0.071    | -0.22     | 0.189   | -0.053 | 0.149     | -0.063    | -0.02     | 0.033  |
| A014936_01 | 0.196     | 0.229     | -0.176  | 0.197  | 0.553     | 0.647     | 0.351     | 0.297  |
| A014938_01 | -0.329    | -0.518    | -0.273  | -0.043 | 0.021     | -0.184    | -0.206    | -0.261 |
| A014939_01 | -0.574    | -0.562    | -0.87   | -0.954 | -0.143    | -0.058    | -0.419    | -0.321 |
| A014942_01 | 0.099     | -0.073    | -0.082  | 0.223  | 0.313     | 0.258     | -0.15     | -0.28  |
| A014945_01 | -1.428    | -1.6      | -0.728  | -0.697 | -1.09     | -1.587    | -0.712    | -0.714 |
| A014947_01 | 0.29      | 0.466     | 0.414   | 0.269  | 0.174     | 0.364     | -0.242    | -0.273 |
| A014948_01 | -0.949    | -1.056    | -0.443  | -0.149 | -0.63     | -0.686    | -0.241    | -0.13  |
| A014951_01 | -0.28     | -0.296    | 0.142   | 0.149  | 0.131     | 0.154 NA  |           | 0.382  |
| A014952_01 | 0.072     | 0.163     | 0.324   | -0.106 | 0.28      | 0.252     | -0.125    | -0.04  |
| A014953_01 | 0.275     | 0.223     | -0.525  | -0.565 | 0.434     | 0.507     | 0.172     | 0.047  |
| A014954_01 | -0.062    | -0.163    | 0.102   | -0.067 | 0.326     | 0.255     | -0.032    | -0.053 |
| A014955_01 | -0.368    | -0.337    | -0.298  | 0.086  | 0.269     | 0.081     | 0.017 NA  |        |
| A014965_01 | 0.602     | 0.602     | 0.77    | 0.574  | 0.097 NA  |           | 0.003 NA  |        |
| A014971_01 | -0.156    | -0.28     | 0.003   | 0.25   | 0.018     | -0.122    | 0.094     | -0.01  |
| A014974_01 | -0.329    | -0.088 NA |         | NA     | -0.375 NA |           | -0.214 NA |        |
| A014976_01 | -0.115    | -0.197    | -0.175  | -0.441 | 0.097     | -0.012    | -0.03     | -0.041 |
| A014979_01 | 0.27      | 0.09      | -0.143  | -0.078 | -0.069    | -0.162    | -0.22 NA  |        |
| A014980_01 | 0.569     | 0.557     | 0.24 NA |        | 0.16      | 0.286     | -0.096 NA |        |
| A014982_01 | -0.251    | -0.162    | 0.126   | 0.472  | -0.016    | -0.031    | 0.307     | 0.273  |
| A014984_01 | 0.578     | 0.586     | -0.041  | 0.157  | 0.297     | 0.526     | -0.268    | -0.147 |
| A014986_01 | 0.392     | 0.167     | -0.212  | -0.271 | 0.083     | 0.218     | 0.035     | -0.094 |
| A014989_01 | 0.255     | 0.248     | 0.454   | 0.39   | -0.169    | -0.122    | -0.09     | -0.193 |
| A014991_01 | 0.429     | 0.266     | -0.342  | -0.31  | 0.38      | 0.471     | 0.155     | 0.162  |



|            |           |           |        |           |          |        |           |        |
|------------|-----------|-----------|--------|-----------|----------|--------|-----------|--------|
| A014996_01 | 0.334     | 0.212     | 0.146  | -0.328    | 0.004    | 0.216  | 0.084     | 0.058  |
| A015002_01 | 0.066     | 0.049     | 0.106  | -0.026    | -0.055   | -0.161 | 0.049     | -0.101 |
| A015008_01 | 0.032     | -0.017    | 0.094  | -0.093    | 0.265    | 0.275  | 0.129     | 0.109  |
| A015009_01 | -0.263    | -0.37     | -0.795 | -0.873    | -0.06    | -0.115 | -0.482    | -0.38  |
| A015011_01 | -0.164    | -0.125    | 0.04   | -0.088    | 0.016 NA |        | -0.161    | -0.35  |
| A015012_01 | -0.047    | -0.262    | -0.289 | 0.261     | -0.186   | -0.147 | -0.083    | 0.036  |
| A015013_01 | -0.516    | -0.477    | -0.412 | -0.009    | -0.136   | -0.083 | -0.343    | -0.171 |
| A015025_01 | 0.034     | -0.132    | 0.519  | 0.151     | 0.275    | 0.02   | 0.483     | 0.232  |
| A015035_01 | 0.801     | 0.606     | 0.033  | 0.034     | 0.12     | 0.362  | 0.023     | -0.174 |
| A015041_01 | -0.159    | -0.033    | 0.263  | -0.368    | -0.089   | -0.254 | 0.188     | 0.059  |
| A015042_01 | 0.456     | 0.418     | -0.117 | 0.039     | 0.249    | 0.306  | -0.203    | -0.259 |
| A015044_01 | 0.311     | 0.229     | 0.278  | -0.095    | 0.059    | -0.039 | 0.11      | 0.04   |
| A015047_01 | 0.206     | 0.29      | -0.159 | -0.058    | -0.223   | -0.219 | 0.585     | 0.562  |
| A015050_01 | -0.462    | -0.431    | -0.063 | 0.158     | -0.273   | -0.461 | 0.376     | 0.384  |
| A015054_01 | 0.751     | 0.485     | 0.295  | -0.855 NA |          | 0.427  | 0.219     | 0.003  |
| A015056_01 | 0.412     | 0.287     | 0.432  | 0.4       | 0.314    | 0.34   | 0.112     | -0.098 |
| A015062_01 | 1.04      | 1.093     | 0.648  | 0.224     | 0.358    | 0.557  | 0.508     | 0.495  |
| A015066_01 | -0.601    | -0.576    | -0.135 | 0.364     | -0.1     | -0.202 | 0.098     | 0.063  |
| A015067_01 | -0.076 NA |           | -0.351 | 0.052     | 0.247 NA |        | -0.028 NA |        |
| A015071_01 | -1.635    | -1.44     | -0.081 | -0.557    | -0.621   | -0.597 | -0.134    | -0.154 |
| A015072_01 | 0.562     | 0.283     | 0.192  | 0.221     | -0.037   | -0.123 | -0.252    | -0.106 |
| A015075_01 | 0.753     | 0.622     | -0.244 | -0.638    | 0.273    | 0.501  | 0.012     | 0.162  |
| A015077_01 | 0.29      | 0.246     | 0.049  | 0.047     | 0.097    | -0.06  | -0.047    | -0.087 |
| A015079_01 | 0.203     | 0.157     | 0.198  | 0.442 NA  |          | 0.21   | 0.598     | 0.143  |
| A015081_01 | 0.462 NA  |           | -0.206 | -0.011    | 0.285 NA |        | 0.11 NA   |        |
| A015082_01 | -0.325    | -0.651    | -0.182 | 0.126     | -0.164   | -0.314 | 0.127     | 0.086  |
| A015083_01 | 0.19      | 0.144     | 0.033  | -0.22     | 0.202    | 0.168  | 0.105     | 0.023  |
| A015084_01 | -0.061    | -0.026    | 0.227  | -0.463    | 0.28     | 0.212  | 0.392     | 0.36   |
| A015088_01 | 0.407     | 0.335     | 0.076  | 0.035     | 0.325    | 0.567  | -0.01     | 0.1    |
| A015090_01 | 0.779     | 0.428     | 0.093  | -0.01     | 0.164    | 0.272  | 0.037     | -0.106 |
| A015092_01 | -0.013    | -0.083    | -0.179 | -0.098    | 0.024    | -0.096 | -0.315 NA |        |
| A015093_01 | -0.276    | -0.362    | -0.024 | 0.114     | -0.187   | -0.246 | -0.075    | -0.051 |
| A015095_01 | 0.623     | 0.809     | 0.662  | 0.706     | -1.237   | -1.503 | -0.042    | 0.124  |
| A015096_01 | -0.481    | -0.644 NA |        | -0.128    | -0.063   | -0.305 | -0.04     | -0.036 |
| A015097_01 | -0.279    | -0.187    | -0.12  | 0.139     | 0.058    | -0.124 | -0.159    | -0.25  |
| A015098_01 | -0.101    | -0.169 NA |        | 0.298     | 0.12     | 0.074  | 0.064     | 0.054  |
| A015102_01 | -0.127    | -0.427    | 0.349  | -0.233    | 0.336    | 0.174  | 0.236     | -0.046 |
| A015105_01 | -0.034    | -0.395    | -1.026 | -0.994    | -0.073   | -0.167 | -0.543    | -0.676 |
| A015108_01 | 0.336     | 0.043     | 0.168  | 0.215     | 0.079    | -0.117 | 0.144     | 0.072  |
| A015109_01 | 0.502     | 0.395     | 0.685  | 0.376     | -0.1 NA  |        | 0.226     | 0.112  |
| A015111_01 | -0.134 NA | NA        |        | -0.326    | 0.057 NA |        | 0.09      | 0.005  |
| A015114_01 | 0.423     | 0.384     | 0.228  | 0.107     | 0.375    | 0.355  | -0.353    | -0.334 |
| A015118_01 | -0.3      | 0.043     | 0.229  | 0.056     | 0.174    | -0.048 | 0.021     | 0.037  |
| A015121_01 | 0.326     | 0.177 NA  |        | -0.05     | 0.358    | -0.055 | 0.09 NA   |        |
| A015124_01 | -0.257    | -0.375    | -0.131 | 0.076     | 0.041    | 0.023  | -0.011    | -0.148 |
| A015125_01 | -0.14     | -0.171    | -0.057 | -0.119    | 0.019    | -0.226 | 0.034     | -0.021 |
| A015126_01 | 0.066     | 0.375     | 0.531  | -0.371    | 0.086    | 0.203  | 0.344     | 0.304  |
| A015128_01 | 0.429     | 0.541     | -0.066 | -0.614    | 0.064    | 0.413  | 0.173 NA  |        |
| A015129_01 | 0.283     | 0.199     | 0.033  | 0.287     | -0.034   | -0.007 | 0.026     | 0.062  |
| A015134_01 | -0.574    | -0.819    | -1.409 | -1.59     | -0.035   | -0.033 | -0.085    | -0.172 |
| A015141_01 | -0.391    | -0.316    | 0.164  | -0.089    | 0.061    | -0.274 | -0.034    | 0.025  |
| A015144_01 | -1.004    | -0.707    | -0.594 | -0.412    | -0.423   | -0.459 | -0.143    | -0.026 |
| A015147_01 | 0.205     | 0.462 NA  | NA     |           | 0.103    | 0.001  | -0.008    | 0.119  |
| A015148_01 | -0.326    | -0.184    | -0.238 | -0.322    | 0.251    | 0.034  | -0.059    | -0.254 |
| A015149_01 | 0.245     | 0.07      | -0.194 | -0.173    | 0.17     | -0.082 | -0.027    | -0.138 |
| A015157_01 | -0.429    | -0.634    | -1.007 | -0.281    | -0.465   | -0.733 | -0.499    | -0.42  |
| A015160_01 | -0.2      | -0.096    | -0.441 | -0.08     | 0.056    | -0.04  | -0.131    | -0.033 |
| A015163_01 | -0.046 NA |           | -0.352 | 0.285     | 0.068 NA |        | -0.235 NA |        |
| A015165_01 | 0.356     | 0.248     | -0.388 | -0.13     | 0.06     | 0.331  | 0.003     | -0.012 |
| A015167_01 | 0.698     | 0.653     | -0.029 | -1.467    | 0.477    | 0.86   | 0.273     | 0.153  |
| A015168_01 | 0.055     | 0.083     | -0.055 | -0.655    | 0.116    | -0.061 | -0.18     | -0.251 |
| A015171_01 | 0.7       | 0.639     | 0.101  | -0.349 NA |          | 0.28   | 0.098     | -0.034 |
| A015181_01 | 0.297     | 0.145     | 0.254  | 0.125     | -0.046   | -0.307 | -0.129    | -0.148 |
| A015182_01 | -0.582    | -0.519    | -0.653 | -0.47     | -0.1     | 0.022  | 0.092     | 0.045  |
| A015183_01 | 0.296     | 0.018     | -0.101 | -0.377    | 0.151    | -0.161 | 0.005     | -0.08  |
| A015185_01 | 0.391     | 0.36      | 0.038  | 0.443     | 0.028    | 0.297  | -0.03     | -0.019 |
| A015187_01 | 0.221     | 0.056     | 0.026  | 0.211     | 0.12     | 0.046  | -0.087    | -0.023 |
| A015190_01 | 0.028     | -0.034    | -0.232 | -0.173    | 0.365    | 0.019  | 0.139     | -0.308 |

|            |           |        |           |           |           |           |           |        |
|------------|-----------|--------|-----------|-----------|-----------|-----------|-----------|--------|
| A015196_01 | 0.169     | -0.112 | -0.191    | -0.082    | 0.073     | 0.026     | -0.036    | 0      |
| A015197_01 | -0.26     | -0.349 | -0.539    | -0.153    | 0.044     | -0.247    | -0.17     | -0.078 |
| A015199_01 | -0.095    | -0.188 | 0.094 NA  |           | 0.133     | -0.295    | -0.169 NA |        |
| A015203_01 | 0.342     | 0.152  | 0.464     | 0.49      | 0.37      | 0.25      | 0.403     | 0.303  |
| A015220_01 | 0.019     | -0.104 | -0.039    | -0.212    | 0.107     | -0.006    | 0.391     | 0.189  |
| A015223_01 | -0.117    | -0.003 | 0.173     | -0.318    | -0.061    | -0.053    | -0.127    | -0.004 |
| A015232_01 | -0.118    | -0.118 | -0.156    | 0.271     | -0.058    | -0.064    | 0.164     | 0.089  |
| A015235_01 | 0.03      | -0.137 | -0.881    | -0.237    | -0.232    | -0.702 NA | NA        |        |
| A015236_01 | 0.315     | 0.418  | 0.1       | -0.174    | 0.062     | 0.039     | -0.114    | -0.095 |
| A015237_01 | 0.536     | 0.611  | -0.059    | -0.155    | -0.036    | 0.309     | 0.017     | 0.16   |
| A015239_01 | -0.291    | -0.233 | 0.089     | 0.073     | -0.12     | -0.15     | -0.124    | -0.103 |
| A015240_01 | -0.304    | -0.435 | -0.68     | 0.133     | -0.094    | -0.32     | -0.197    | -0.122 |
| A015243_01 | 0.251     | 0.234  | 0.052     | -0.405    | 0.299     | 0.366     | 0.196     | 0.057  |
| A015246_01 | 0.207 NA  |        | 0.174     | 0.091     | 0.194 NA  |           | 0.2 NA    |        |
| A015249_01 | -0.798    | -1.1   | -0.64     | -0.441    | -0.266    | -0.183    | 0.001     | -0.093 |
| A015251_01 | -0.14     | -0.099 | 0.184     | 0.203     | -0.014    | -0.038    | -0.151    | -0.105 |
| A015257_01 | 0.336     | 0.49   | -0.053    | -0.728    | 0.156     | 0.234     | 0.175     | 0.179  |
| A015260_01 | -0.041    | -0.198 | -0.022    | -0.357    | 0.396     | 0.433     | 0.41      | 0.288  |
| A015263_01 | 0.63      | 0.708  | 0.023     | -0.234    | 0.541     | 0.938     | 0.042     | -0.081 |
| A015264_01 | 0.652     | 0.582  | -0.288    | -0.272    | 0.267     | 0.383     | 0.193     | 0.118  |
| A015265_01 | 0.499     | 0.495  | 0.536     | 0.296     | -0.058    | -0.005    | 0.387     | 0.154  |
| A015266_01 | 0.497     | 0.392  | 0.544     | 0.39      | 0.109     | -0.017    | 0.434     | 0.136  |
| A015267_01 | 0.413     | 0.449  | -0.222    | 0.003     | -0.066    | -0.001    | -0.411    | -0.361 |
| A015269_01 | -0.187    | 0.225  | 0.163     | -0.236    | -0.117    | -0.039    | 0.049     | 0.201  |
| A015271_01 | 0.035     | -0.172 | 0.196     | 0.016     | 0.131     | -0.049    | -0.038    | -0.356 |
| A015272_01 | 0.108     | 0.003  | 0.099     | 0.081     | -0.011    | -0.144    | -0.15     | -0.256 |
| A015279_01 | 0.553     | 0.562  | 0.305     | 0.362     | 0.289     | 0.454     | 0.104     | 0.068  |
| A015281_01 | -1.368 NA | NA     | NA        |           | -0.165    | -0.625    | -0.535 NA |        |
| A015283_01 | 0.247     | 0.398  | 0.008     | -0.244    | 0.065     | 0.211     | 0.024     | 0.061  |
| A015284_01 | 0.045     | 0.029  | -0.023    | 0.172     | -0.108    | -0.115    | -0.009    | -0.048 |
| A015285_01 | 0.229     | 0.086  | 0.134     | -0.208    | 0.328     | 0.094     | 0.125     | -0.04  |
| A015286_01 | 0.047     | -0.087 | -0.408    | 0.157     | -0.002    | -0.023    | -0.368    | -0.084 |
| A015294_01 | 0.336     | 0.255  | 0.397     | 0.325     | 0.272     | 0.023     | 0.184     | 0.068  |
| A015296_01 | 0.103     | -0.008 | 0.143     | 0.05      | 0.135     | 0.223     | 0.106     | -0.121 |
| A015301_01 | -0.186 NA | NA     |           | -0.391    | -0.015 NA |           | -0.008    | -0.192 |
| A015302_01 | 0.457     | 0.368  | -0.25     | 0.422     | -0.027    | 0.067     | -0.415    | -0.32  |
| A015313_01 | 0.462     | 0.153  | -0.314    | 0.019     | 0.385     | 0.27      | -0.361    | -0.288 |
| A015314_01 | 0.502     | 0.454  | 0.007     | -0.414    | 0.111     | 0.25      | 0.098     | 0.094  |
| A015319_01 | -0.077    | -0.175 | -0.15     | 0.147     | 0.136     | 0.046     | -0.177    | -0.237 |
| A015320_01 | -0.199    | -0.183 | 0.004     | 0.465     | -0.104    | 0.06      | -0.06     | -0.041 |
| A015321_01 | 0.558     | 0.206  | 0.3       | 0.325     | 0.299     | 0.338     | 0.406     | 0.153  |
| A015323_01 | 0.453     | 0.574  | -0.082    | -0.241    | 0.162     | 0.197     | 0.007     | 0.015  |
| A015331_01 | 0.809     | 0.87   | 0.95      | 1.01      | 0.482     | 0.605     | 0.321     | 0.242  |
| A015336_01 | 0.097     | 0.086  | -0.001    | 0.212     | 0.136     | 0.168     | -0.147    | -0.267 |
| A015339_01 | -1.852    | -2.333 | -0.824    | -1.15     | -1.078    | -1.503    | -0.375    | -0.465 |
| A015345_01 | 1.052     | 1.009  | 1.392     | 1.337     | -0.045    | 0.035     | -0.431    | -0.32  |
| A015349_01 | 0.078     | -0.189 | -0.272    | -0.132    | -0.02     | -0.183    | -0.209    | -0.253 |
| A015351_01 | -0.297    | -0.257 | 0.443     | 0.534     | -0.34     | -0.065    | -0.04     | 0.008  |
| A015356_01 | -0.602    | -0.474 | -0.38     | -0.216    | -0.336 NA |           | 0.117     | 0.101  |
| A015357_01 | 0.072     | 0.421  | 0.401     | 0.136     | 0.073     | -0.13     | -0.068    | -0.018 |
| A015360_01 | 0.661     | 0.645  | 0.313     | 0.322     | -0.028    | -0.183    | -0.296 NA |        |
| A015361_01 | 0.442     | 0.223  | -0.152    | -0.137    | 0.037     | 0.111     | -0.056    | -0.115 |
| A015368_01 | -0.288    | -0.219 | 0.172     | 0.158     | 0.127     | 0.036     | -0.198    | -0.2   |
| A015378_01 | -0.594    | -0.257 | -0.293    | -0.406    | -0.13     | -0.106    | -0.046    | 0.033  |
| A015380_01 | -1.743    | -1.483 | -1.665    | -1.594    | -1.104    | -1.343    | -0.646    | -0.573 |
| A015388_01 | -0.094    | -0.053 | -0.018    | 0.054     | 0.052     | -0.148    | -0.052    | -0.087 |
| A015394_01 | 0.208     | 0.033  | -0.565    | -0.896    | 0.188     | 0.257     | -0.097    | -0.266 |
| A015397_01 | -0.425    | -0.78  | 0.04      | 0.304     | 0.066     | -0.407    | 0.029     | -0.1   |
| A015404_01 | 0.299     | 0.322  | 0.149     | 0.202     | 0.105     | 0.089     | -0.036    | -0.059 |
| A015414_01 | 0.564     | 0.569  | 0.312     | 0.197     | 0.354     | 0.372     | 0.049     | -0.012 |
| A015422_01 | -0.426    | -0.758 | -0.276    | -0.311    | -0.035    | -0.174    | 0.298     | 0.087  |
| A015423_01 | 0.11      | -0.057 | -0.191    | 0.344     | 0.46      | 0.497     | -0.016    | -0.091 |
| A015431_01 | -0.409    | -0.247 | -0.043    | -0.025    | -0.317    | -0.233    | 0.055     | 0.096  |
| A015432_01 | 0.306     | 0.321  | -0.052    | -0.439    | 0.12      | 0.173     | -0.008    | -0.156 |
| A015434_01 | 0.532     | 0.328  | 0.112     | -0.047 NA |           | 0.089     | -0.111    | -0.035 |
| A015435_01 | 0.112 NA  |        | -0.133    | -0.169    | -0.11 NA  |           | -0.028    | -0.041 |
| A015439_01 | -0.406    | -0.294 | -0.195    | -0.495    | -0.113    | -0.298    | -0.579    | -0.434 |
| A015442_01 | -0.554    | -0.601 | -0.239 NA |           | -0.031    | -0.346    | -0.473 NA |        |

|            |           |          |          |          |           |        |           |        |
|------------|-----------|----------|----------|----------|-----------|--------|-----------|--------|
| A015444_01 | -0.111    | -0.353   | -0.364   | -0.122   | -0.013    | -0.296 | -0.328    | -0.297 |
| A015445_01 | -0.068    | -0.071   | 0.05     | -0.585   | 0.24      | 0.161  | 0.117     | 0      |
| A015446_01 | -0.311    | -0.275   | 0.209    | -0.289   | 0.588     | 0.699  | -0.195    | -0.117 |
| A015447_01 | -0.63     | -0.635   | -0.61    | -0.569   | 0.045     | 0.046  | -0.436    | -0.401 |
| A015448_01 | -0.5      | -0.731   | -0.149   | 0.351    | 0.138     | -0.105 | 0.264     | 0.057  |
| A015450_01 | 0.233     | 0.122    | -0.259   | -0.177   | 0.001     | 0.22   | 0.018     | -0.105 |
| A015453_01 | -0.715    | -0.641   | -0.271   | -0.318   | -0.475    | -0.562 | -0.274    | -0.103 |
| A015454_01 | -0.124    | -0.273   | 0.1      | -0.374   | 0.08      | -0.045 | 0.395     | 0.129  |
| A015455_01 | 0.708     | 0.676    | 0.436    | 0.17     | 0.048     | 0.137  | 0.123     | 0.006  |
| A015457_01 | 0.478     | 0.284    | 0.223    | -0.172   | 0.277     | 0.24   | -0.028    | -0.16  |
| A015458_01 | 0.234     | 0.217    | 0.232    | 0.101    | 0.12      | 0.065  | 0.103     | 0.062  |
| A015462_01 | -0.046    | -0.123   | -0.012   | -0.339   | -0.096    | -0.269 | -0.01     | -0.218 |
| A015463_01 | 0.717     | 0.622    | 0.392    | 0.588    | -0.436    | -0.275 | -0.48     | -0.369 |
| A015464_01 | -0.012    | -0.16    | 0.446    | 0.947    | 0.208     | -0.245 | 0.426     | 0.287  |
| A015465_01 | 0.825     | 0.996    | 0.898    | 0.746    | 0.486     | 0.483  | 0.383     | 0.465  |
| A015466_01 | 0.152     | 0.045    | 0.077    | -0.045   | 0.244     | 0.252  | 0.144     | 0.031  |
| A015472_01 | -0.088    | -0.165   | 0.175 NA |          | -0.205    | -0.508 | -0.405 NA |        |
| A015473_01 | 0.185     | -0.034   | -0.314   | -0.286   | -0.149    | -0.137 | -0.241    | -0.267 |
| A015474_01 | -0.35     | -0.398   | -0.132   | -0.367   | -0.043    | -0.263 | -0.055    | -0.125 |
| A015475_01 | 0.272     | 0.085    | 0.1 NA   |          | 0.162     | -0.277 | -0.023 NA |        |
| A015477_01 | 0.053     | 0.197    | 0.193    | 0.07     | 0         | -0.018 | 0.197     | 0.076  |
| A015481_01 | 0.033     | -0.048   | -0.191   | -0.334   | 0.084     | -0.006 | -0.335    | -0.236 |
| A015483_01 | -2.888    | -3.229   | -2.395   | -2.843   | -1.595    | -2.56  | -1.947    | -1.645 |
| A015484_01 | 0.028     | -0.285   | -0.424   | 0.175    | -0.027    | -0.179 | -0.397    | -0.311 |
| A015487_01 | -0.48     | -0.447   | -0.67    | -0.838   | -0.207    | -0.245 | 0.115     | 0.008  |
| A015490_01 | 0.235 NA  |          | -0.512   | -0.448   | 0.062 NA  |        | -0.004    | -0.067 |
| A015492_01 | -0.73     | -0.978   | 0.195    | -0.033   | -1.046    | -1.489 | -0.263    | -0.196 |
| A015493_01 | 0.534     | 0.423    | 0.111    | -0.509   | 0.046 NA  |        | 0.103     | 0.003  |
| A015498_01 | -1.335    | -1.348   | -0.107   | -0.567   | -0.629    | -0.633 | -0.071    | -0.198 |
| A015504_01 | -0.327    | -0.346   | -1.372   | -1.292   | -0.125    | 0.129  | -0.479    | -0.368 |
| A015505_01 | 0.722     | 0.314    | 0.156    | 0.145    | -0.217    | -0.231 | 0.308     | 0.158  |
| A015508_01 | -0.293 NA |          | -0.87    | -0.949   | -0.26 NA  |        | -0.364 NA |        |
| A015510_01 | -0.668    | -0.621   | -0.96    | -0.527   | -0.329    | -0.152 | -0.686    | -0.493 |
| A015511_01 | 0.091     | -0.105   | 0.102    | 0.283    | 0.503     | -0.126 | -0.014    | -0.186 |
| A015513_01 | -0.412    | -0.103   | -0.162   | -0.105   | -0.085    | -0.148 | -0.121    | -0.063 |
| A015519_01 | 0.339     | 0.424    | 0.21     | -0.298   | 0.125     | 0.292  | 0.152 NA  |        |
| A015522_01 | 0.092     | -0.013   | 0.18     | 0.196    | 0.15      | -0.115 | -0.071    | -0.189 |
| A015523_01 | 0.166     | 0.218    | 0.238    | -0.319   | 0.271     | 0.377  | 0.039     | 0.072  |
| A015524_01 | 0.141     | 0.087    | 0.09     | -0.177   | -0.244    | -0.3   | -0.177    | -0.023 |
| A015530_01 | 0.138     | 0.166    | -0.296   | -0.032   | 0.086     | 0.017  | 0.048     | 0.038  |
| A015534_01 | -0.462    | -0.38    | -0.027   | -0.621   | -0.019    | -0.056 | -0.12     | 0.163  |
| A015536_01 | -0.352    | -0.34    | 0.12     | 0.064    | -0.24     | -0.331 | -0.153    | 0.022  |
| A015539_01 | -0.179    | -0.19    | 0.059    | 0.288    | 0.003     | 0.131  | -0.395    | -0.282 |
| A015540_01 | -1.282    | -0.937   | -0.634   | -0.688   | 0.177     | 0.567  | 0.041     | 0.141  |
| A015543_01 | -0.208    | -0.291   | -0.187   | -0.018   | 0.342     | 0.137  | -0.472    | -0.465 |
| A015548_01 | -0.257    | -0.194   | -1.083   | -0.919   | -0.288    | -0.295 | -0.507    | -0.434 |
| A015550_01 | -0.042    | -0.09    | -0.167   | -0.262   | 0.129     | 0.093  | 0.086     | -0.244 |
| A015558_01 | 0.336     | 0.407    | 0.54     | -0.506   | 0.481     | 0.822  | -0.047    | 0.077  |
| A015563_01 | 0.641     | 0.42     | 0.17     | 0.153 NA | NA        |        | -0.021    | -0.256 |
| A015571_01 | -0.29     | -0.565   | -0.321   | 0.086    | -0.091    | -0.162 | -0.003    | 0.007  |
| A015576_01 | 0.305     | 0.125    | -0.306   | 0.249    | -0.237    | -0.173 | -0.204    | -0.122 |
| A015578_01 | -0.147    | -0.317   | -0.156   | 0.103    | -0.068 NA |        | 0.094     | -0.071 |
| A015579_01 | 0.434     | 0.418    | 0.337    | -0.019   | 0.222     | 0.314  | 0.006     | 0.064  |
| A015585_01 | -0.293    | -0.649   | -0.287   | 0.133    | 0.021     | -0.421 | -0.142    | -0.071 |
| A015586_01 | -0.349    | -0.394   | -0.05    | 0.13     | -0.111    | -0.556 | -0.046    | -0.154 |
| A015587_01 | -0.083    | 0.146    | 0.253    | 0.093    | 0.257     | 0.134  | 0.117     | 0.154  |
| A015591_01 | -0.786    | -0.469   | -0.398   | 0.075    | -0.2      | -0.11  | -0.117    | -0.013 |
| A015595_01 | -0.363    | -0.633   | -0.553   | -0.454   | -0.323    | -0.431 | -0.33     | -0.357 |
| A015599_01 | 0.656     | 0.686    | 0.531    | 0.142    | 0.062     | 0.254  | 0.215     | 0.35   |
| A015600_01 | 0.384     | 0.328    | 0.28     | 0.335    | 0.161 NA  |        | 0.151     | -0.011 |
| A015605_01 | -0.084    | -0.027   | 0.239 NA |          | 0.052     | -0.216 | 0.243 NA  |        |
| A015607_01 | -0.25     | -0.342   | 0.095    | -0.041   | 0.12      | -0.079 | -0.036    | 0.003  |
| A015608_01 | -0.038 NA |          | 0.22     | 0.851    | 0.506     | 0.385  | 0.291     | 0.407  |
| A015613_01 | 0.584     | 0.448    | 0.244    | 0.299    | 0.129     | -0.069 | 0.059     | -0.075 |
| A015616_01 | 0.093     | 0.001 NA |          | 0.09     | 0.047     | 0.026  | 0.029     | -0.07  |
| A015617_01 | -0.031    | 0.168    | 0.334    | -0.006   | 0.283     | 0.315  | 0.069     | 0.167  |
| A015619_01 | -0.001    | 0.113    | 0.336    | 0.402    | 0.134     | 0.138  | 0.027     | -0.015 |
| A015625_01 | 0.213     | 0.253    | -0.005   | -0.099   | 0.246 NA  |        | 0.144     | -0.124 |

|            |           |           |        |        |           |           |           |        |
|------------|-----------|-----------|--------|--------|-----------|-----------|-----------|--------|
| A015629_01 | 0.149     | 0.492     | 0.651  | 0.496  | 0.203     | 0.461     | 0.121     | 0.426  |
| A015634_01 | 0.294     | 0.193     | 0.559  | 0.388  | 0.398     | 0.434     | 0.12      | -0.018 |
| A015635_01 | -0.023 NA |           | 0.137  | 0.027  | 0.16 NA   | NA        |           | 0.044  |
| A015637_01 | 0.007 NA  |           | -0.173 | -0.231 | 0.14 NA   |           | 0.091 NA  |        |
| A015638_01 | -0.117    | -0.092    | -0.263 | -0.164 | 0.168     | 0.103     | 0.107 NA  |        |
| A015639_01 | -0.081    | -0.38     | -0.386 | -0.902 | 0.091     | -0.042    | 0.262     | 0.253  |
| A015641_01 | -0.715    | -0.868    | -0.751 | -0.276 | -0.223    | -0.304    | -0.415    | -0.395 |
| A015643_01 | 0.07      | -0.007    | -0.08  | -0.097 | 0.177     | 0.005     | 0.254     | 0.119  |
| A015645_01 | 0.043     | 0.276     | 0.066  | -0.042 | 0.216     | 0.099     | 0.22 NA   |        |
| A015646_01 | -0.009    | 0.193     | 0.301  | 0.353  | -0.117    | -0.007    | -0.108    | 0.044  |
| A015647_01 | -0.288    | -0.507    | 0.22   | -0.037 | -0.021    | -0.146    | -0.017    | -0.17  |
| A015648_01 | 0.148     | 0.071     | 0.138  | -0.116 | 0.128     | 0.038     | 0.23      | 0.164  |
| A015649_01 | -0.308    | -0.358    | -0.3   | -0.413 | 0.056     | 0.139     | -0.094    | -0.15  |
| A015650_01 | -0.083    | -0.126    | -0.016 | -0.084 | -0.044    | -0.072    | 0.128     | 0.002  |
| A015651_01 | -0.356    | -0.256    | -0.295 | -0.078 | -0.41 NA  |           | -0.138    | -0.176 |
| A015653_01 | 0.071     | -0.14     | -0.297 | 0.006  | -0.028    | 0.278     | 0.214     | 0.078  |
| A015654_01 | -0.138    | -0.152    | -0.091 | -0.406 | 0.099     | -0.052    | 0.024     | -0.091 |
| A015658_01 | -0.268    | -0.112    | -0.257 | -0.786 | -0.175    | 0.021     | -0.172    | -0.066 |
| A015659_01 | -0.404 NA |           | 0.423  | -0.313 | -0.244 NA |           | 0.289     | 0.079  |
| A015660_01 | -0.192    | -0.037    | -0.056 | 0.388  | 0.08      | 0.218     | 0.106     | 0.262  |
| A015662_01 | 0.324     | 0.258     | 0.501  | 0.252  | 0.023     | -0.142    | 0.333     | 0.162  |
| A015663_01 | 0.469     | 0.493     | 0.405  | 0.367  | -0.145    | -0.197    | -0.016    | 0.142  |
| A015665_01 | -0.026    | 0.101     | 0.496  | 0.449  | -0.053    | 0.001     | 0.305     | 0.317  |
| A015667_01 | -0.214    | -0.213    | 0.166  | 0.289  | -0.063    | -0.396    | -0.209    | -0.334 |
| A015668_01 | -0.002    | -0.22     | -0.561 | -0.161 | -0.09     | -0.347    | -0.189    | -0.436 |
| A015673_01 | 0.147     | 0.051     | 0.007  | 0.28   | 0.02      | -0.042    | -0.118    | -0.214 |
| A015678_01 | 0.267     | 0.19      | 0.107  | 0.018  | 0.225     | 0.193     | 0.051     | 0.071  |
| A015679_01 | -0.42     | -0.483    | -0.587 | -0.883 | -0.098    | -0.189    | -0.454    | -0.389 |
| A015692_01 | -0.119    | -0.018 NA |        | 0.067  | -0.005    | 0.44      | 0.195 NA  |        |
| A015697_01 | -0.186    | 0         | 0.004  | 0.146  | 0.053     | -0.002    | 0.205     | -0.018 |
| A015703_01 | 0.039     | -0.09     | -0.156 | -0.13  | 0.274     | -0.055    | -0.068 NA |        |
| A015705_01 | -0.485    | 0.132     | -0.069 | -0.062 | -0.143    | 0.112     | -0.17     | 0.248  |
| A015707_01 | -0.013    | 0.013     | -0.04  | -0.278 | 0.193     | 0.212     | -0.009    | 0.058  |
| A015713_01 | 0.194     | 0.079     | -0.116 | 0.109  | 0.12      | 0         | -0.135    | -0.132 |
| A015716_01 | 0.183     | 0.221     | 0.05   | -0.33  | 0.114     | 0.074     | 0.018 NA  |        |
| A015723_01 | -0.261    | -0.329    | 0.028  | -0.24  | -0.062    | -0.116    | -0.037    | -0.073 |
| A015724_01 | 0.288     | 0.363     | 0.271  | 0.049  | 0.258     | -0.138    | 0.095     | 0.058  |
| A015725_01 | -0.074    | -0.233    | 0.123  | 0.164  | -0.004    | -0.272    | 0.006     | -0.134 |
| A015733_01 | -1.186 NA | NA        |        | -0.147 | -0.56 NA  |           | -0.177 NA |        |
| A015739_01 | -0.344    | -0.285    | -0.108 | -0.023 | -0.108    | 0.011     | -0.068    | -0.248 |
| A015744_01 | 0.493     | 0.296     | -0.004 | 0.198  | 0.101 NA  |           | 0.071     | -0.06  |
| A015747_01 | -0.01     | -0.1 NA   |        | -0.035 | 0.281     | 0.096     | 0.093     | -0.074 |
| A015750_01 | 0.295     | 0.088     | -0.098 | -0.272 | -0.03     | -0.437    | -0.087    | -0.137 |
| A015753_01 | 0.095     | 0.019     | -0.103 | 0.225  | 0.025     | -0.073    | 0.021     | -0.104 |
| A015757_01 | -0.784    | -0.806    | -0.594 | -0.182 | -0.389    | -0.455    | -0.216 NA |        |
| A015762_01 | 0.1       | 0.203     | 0.548  | -0.131 | -0.262    | -0.482    | 0.198     | -0.048 |
| A015763_01 | 0.487 NA  |           | 0.185  | -0.209 | 0.201 NA  |           | 0.063 NA  |        |
| A015772_01 | 0.244     | 0.09      | 0.519  | 0.288  | -0.064 NA |           | 0.265     | 0.167  |
| A015776_01 | 0.092     | 0.051     | -0.272 | -0.116 | 0.337     | 0.311     | -0.055    | 0.069  |
| A015777_01 | 0.082     | -0.071    | 0.244  | 0.105  | 0.233     | 0.044     | 0.235     | 0.077  |
| A015778_01 | 0.107     | 0.176     | 0.017  | -0.14  | 0.236     | 0.335     | 0.145     | -0.035 |
| A015779_01 | 0.274     | 0.135     | 0.004  | -0.111 | -0.435 NA |           | 0.052     | -0.022 |
| A015780_01 | 0.266     | 0.365     | 0.176  | -0.131 | -0.032    | 0.032     | -0.16 NA  |        |
| A015790_01 | 0.257     | 0.287     | 0.33   | -0.027 | 0.187     | 0.306     | 0.055     | 0.054  |
| A015793_01 | -0.477    | -0.883 NA | NA     |        | -0.904    | -1.265 NA | NA        |        |
| A015794_01 | -0.253    | -0.341    | -0.409 | -0.037 | 0.202     | 0.091     | -0.056    | -0.021 |
| A015797_01 | 0.252     | 0.205     | 0.154  | 0.199  | 0.356     | 0.233     | -0.266    | -0.316 |
| A015800_01 | -0.43     | -0.38     | -0.074 | 0.282  | 0.009     | -0.377    | -0.219 NA |        |
| A015805_01 | 0.234     | 0.207     | -0.015 | -0.038 | 0.102     | -0.022    | -0.348 NA |        |
| A015822_01 | 0.636     | 0.714     | 0.091  | 0.159  | 0.044     | 0.408     | -0.159    | 0.123  |
| A015825_01 | 0.464     | 0.527     | -0.136 | 0.219  | 0.083     | 0.204     | -0.282    | -0.264 |
| A015827_01 | 0.281     | 0.347     | 0.428  | -0.452 | -0.059    | -0.052    | 0.139     | 0.034  |
| A015833_01 | -0.032    | -0.039    | -0.569 | -0.283 | 0.133     | 0.352     | -0.212    | -0.242 |
| A015835_01 | 0.201     | 0.049     | 0.163  | 0.308  | 0.424     | 0.492     | 0.452     | 0.315  |
| A015837_01 | 0.114     | 0.18      | 0.42   | 0.263  | -0.179    | -0.473    | 0.095     | 0.019  |
| A015840_01 | 0.239     | -0.021    | 0.271  | 0.352  | -0.043    | -0.373    | 0.047     | -0.11  |
| A015841_01 | 0.519     | 0.386     | 0.358  | 0.101  | 0.07      | 0.148     | 0.121 NA  |        |
| A015843_01 | 0.478     | 0.397     | 0.251  | -0.683 | 0.22      | 0.477     | 0.283     | 0.184  |

|            |           |          |           |          |           |           |           |        |
|------------|-----------|----------|-----------|----------|-----------|-----------|-----------|--------|
| A015844_01 | 0.395     | 0.055    | 0.361     | 0.204    | 0.223     | 0.105     | -0.036    | -0.211 |
| A015850_01 | 0.214     | 0.142    | 0.221     | 0.777    | 0.214     | 0.372     | -0.088    | -0.148 |
| A015856_01 | -0.324 NA |          | 0.001     | -0.242   | -0.255 NA |           | 0         | 0.019  |
| A015860_01 | -0.966    | -0.962   | -1.155    | -0.962   | -2.108    | -3.259    | -2.523    | -2.138 |
| A015861_01 | 1.159     | 0.903    | 0.035     | -0.348   | 0.27      | 0.062     | 0.143     | -0.162 |
| A015862_01 | 0.495     | 0.384    | 0.369     | -0.122   | 0.183     | 0.352     | 0.171     | 0.139  |
| A015864_01 | 0.172     | -0.19    | -0.069    | 0.355    | -0.567 NA |           | -0.104    | -0.127 |
| A015866_01 | 0.111     | 0.275    | 0.44      | 0.759    | 0.308     | 0.455     | 0.364     | 0.131  |
| A015870_01 | -0.063    | 0.121    | -0.064    | -0.157   | 0.189     | 0.146     | -0.297 NA |        |
| A015874_01 | 0.275 NA  |          | -0.011    | -0.469   | 0.178     | 0.356     | 0.357     | 0.281  |
| A015876_01 | -0.328    | -0.176   | -0.113    | 0.163    | -0.093    | -0.075    | -0.089 NA |        |
| A015877_01 | 0.675     | 0.563    | 0.633     | 0.581    | 0.093     | -0.101    | 0.503     | 0.231  |
| A015878_01 | -0.107    | -0.39    | -0.381    | -0.432   | -0.273    | -0.373    | -0.181    | -0.326 |
| A015879_01 | 0.505     | 0.249    | 0.694     | 0.145    | 0.653     | 0.452     | 0.427     | 0.291  |
| A015881_01 | -0.222    | -0.167   | 0.083     | -0.359   | 0.063     | -0.088    | 0.024     | -0.105 |
| A015882_01 | 0.086     | 0.042    | 0.416     | 0.075    | 0.099     | -0.137    | 0.228     | 0.034  |
| A015883_01 | -0.124    | -0.264   | -0.74     | -0.966   | -0.269    | -0.283    | -0.246    | -0.126 |
| A015892_01 | -0.295    | -0.121   | -0.719    | -0.382   | -0.206    | 0.017     | -0.101    | 0      |
| A015893_01 | -0.156    | -0.077   | -0.221    | 0.034    | -0.406    | -0.44     | -0.209    | -0.111 |
| A015895_01 | -0.267    | -0.464   | -0.034    | 0.112    | -0.156    | -0.445    | -0.042    | -0.112 |
| A015896_01 | -0.134    | 0.113    | 0.109     | 0.068    | 0.227     | 0.241     | 0.21      | 0.236  |
| A015900_01 | -0.475    | -0.19    | -0.266    | -0.418   | 0.011     | 0.089     | 0.008     | -0.042 |
| A015904_01 | -0.297    | 0.024    | 0.167     | 0.315    | 0.11      | 0.306     | 0.368     | 0.523  |
| A015905_01 | -1.023 NA |          | -0.182    | -0.459   | -0.499    | -0.795    | 1.06      | 0.764  |
| A015906_01 | -0.036    | -0.066   | -0.342    | -0.123   | 0.137     | 0         | -0.012 NA |        |
| A015910_01 | 0.046     | -0.129   | -0.111    | -0.002   | 0.276     | 0.072     | 0.133     | 0.044  |
| A015913_01 | -0.269    | -0.277   | 0.055     | -0.215   | 0.25      | 0.042     | 0.173     | -0.009 |
| A015916_01 | -0.145    | -0.192   | 0.164     | -0.091   | 0.175     | 0.035     | -0.054    | 0.074  |
| A015922_01 | 0.471     | 0.561    | 0.116     | 0.831    | 0.463     | 0.364     | 0.268 NA  |        |
| A015923_01 | 0.059     | -0.029   | 0.361     | 0.141    | 0.206     | -0.002    | 0.425     | 0.326  |
| A015929_01 | 0.913     | 0.568    | -0.254    | -1.041   | 0.133     | 0.341     | -0.106    | -0.258 |
| A015930_01 | 0.234     | 0.215    | 0.068     | -0.218   | 0.111     | 0.273     | 0.287     | -0.028 |
| A015936_01 | -0.363    | -0.761   | -0.26     | -0.018   | 0.637     | 0.602     | -1.003    | -1.161 |
| A015938_01 | 0.232     | 0.485    | 1.071     | 1.08     | 0.586     | 0.831     | 0.776     | 0.541  |
| A015940_01 | 0.367     | 0.141    | 0.272     | 0.351    | -0.061    | -0.383    | -0.1      | -0.229 |
| A015941_01 | -0.17     | -0.125   | 0.422     | 0.409    | -0.173    | -0.534    | 0.047 NA  |        |
| A015946_01 | 0.1       | 0.087    | 0.006     | 0.32     | -0.15     | -0.272    | -0.108    | -0.239 |
| A015948_01 | -0.456    | -0.372   | 0.114     | 0.39     | -1.461    | -1.878    | -0.716 NA |        |
| A015954_01 | -0.097    | -0.07 NA | NA        |          | -0.075    | -0.104 NA |           | -0.056 |
| A015955_01 | -0.276    | -0.153   | 0.304     | 0.035 NA |           | 0.062     | 0.427     | 0.203  |
| A015956_01 | 0.144     | 0.107    | 0.268     | 0.139    | 0.095     | 0.067     | -0.106    | 0.054  |
| A015958_01 | -0.502    | -0.43    | -0.446    | -0.127   | -0.042    | 0.086     | -0.063    | -0.1   |
| A015959_01 | -0.1      | -0.136   | 0.115     | 0.007    | 0.068     | 0.12      | 0.138     | 0.098  |
| A015962_01 | 0.293     | 0.28     | 0.01      | -0.944   | 0.31      | 0.478     | -0.005    | -0.086 |
| A015963_01 | -0.465    | -0.7     | 0.081     | -0.513   | 0.432     | 0.131     | -0.067    | -0.172 |
| A015967_01 | -3.24 NA  | NA       | NA        |          | -2.344 NA |           | -0.844 NA |        |
| A015968_01 | 0.159     | 0.126    | 0.159     | 0.248    | 0.025     | 0.054     | -0.121    | -0.199 |
| A015972_01 | 0.144 NA  |          | -0.063    | -0.203   | 0.022 NA  |           | -0.034    | -0.095 |
| A015973_01 | 0.052     | 0        | 0.149     | -0.479   | 0.103     | 0.228     | 0.296     | 0.272  |
| A015977_01 | 0.105     | 0.158    | -0.074    | -1.315   | 0.024     | 0.104     | 0.178     | 0.083  |
| A015979_01 | -0.52     | -0.586   | -0.285    | -0.092   | 0.022     | -0.11     | -0.059    | -0.122 |
| A015980_01 | 0.168     | 0.196    | 0.25      | 0.32     | 0.205     | 0.204     | 0.206     | 0.282  |
| A015982_01 | 0.6       | 0.456    | 0.035     | 0.391    | -0.146    | -0.104    | -0.262    | -0.31  |
| A015984_01 | -0.75     | -0.563   | -0.645    | -1.121   | -0.116    | -0.088    | -0.37     | -0.308 |
| A015986_01 | -0.096 NA |          | -0.095    | -0.328   | 0.203 NA  |           | 0.059 NA  |        |
| A015987_01 | 0.249     | 0.286    | 0.285     | -0.033   | 0.092     | 0.064     | -0.141    | -0.202 |
| A015988_01 | 0.212     | 0.266    | 0.171     | 0.16     | -0.092    | -0.292    | -0.12 NA  |        |
| A015990_01 | -0.165    | -0.232   | -0.149 NA |          | -0.051    | -0.019    | 0.065     | -0.004 |
| A015995_01 | 0.408     | 0.423    | 0.278     | 0.001    | 0.257     | 0.141     | -0.007    | -0.009 |
| A015996_01 | -0.214 NA |          | -0.028    | -0.337   | -0.006 NA |           | 0.195     | 0.259  |
| A015997_01 | -0.041    | -0.104   | 0.044     | 0.449    | -0.14     | -0.353    | -0.258    | -0.302 |
| A015998_01 | 0.179     | 0.285    | 0.186     | -0.185   | 0.19      | 0.053     | 0.292     | 0.138  |
| A016000_01 | 0.278     | 0.285    | 0.154     | -0.506   | 0.308     | 0.183     | 0.25      | -0.061 |
| A016011_01 | 0.193     | 0.153    | 0.253     | -0.398   | 0.184     | 0.137     | 0.026     | -0.036 |
| A016012_01 | -0.145    | -0.256   | -0.24     | 0.093    | -0.001    | -0.259    | 0.073     | 0.019  |
| A016019_01 | 0.342     | 0.234    | 0.232     | 0.17     | -0.056    | -0.216    | 0.065     | 0.041  |
| A016020_01 | 0.013 NA  |          | -0.012    | -0.422   | -0.025 NA |           | -0.002    | 0.085  |
| A016021_01 | -0.397    | -0.392   | -0.294    | -0.136   | 0.151     | 0.123     | 0.02      | -0.113 |

|            |           |        |           |          |           |        |           |        |
|------------|-----------|--------|-----------|----------|-----------|--------|-----------|--------|
| A016022_01 | -0.179    | -0.235 | -0.21     | 0.111    | -0.048    | -0.163 | -0.205    | -0.271 |
| A016023_01 | 0.43      | 0.441  | 0.265     | 0.07     | 0.083     | 0.04   | -0.059    | -0.022 |
| A016028_01 | -0.548    | -0.34  | 0.112     | 0.307    | -0.342    | -0.356 | -0.545    | -0.464 |
| A016029_01 | -0.241    | -0.45  | -0.024    | -0.298   | -0.125    | -0.398 | -0.204    | -0.124 |
| A016033_01 | 0.817     | 0.646  | 0.054     | 0.164 NA | NA        |        | -0.057    | -0.008 |
| A016034_01 | 0.92      | 0.765  | 1.416     | 1.475    | 0.945     | 1.277  | 0.699     | 0.623  |
| A016035_01 | -0.065    | -0.1   | -0.053    | 0.464    | -0.09     | -0.19  | -0.149    | -0.207 |
| A016041_01 | 0.086     | 0.043  | -0.032 NA |          | 0.327     | 0.234  | 0.285 NA  |        |
| A016044_01 | 0.266 NA  |        | 0.595     | 0.396    | 0.183 NA  |        | 0.024     | 0.111  |
| A016046_01 | 0.29      | 0.324  | 0.197     | 0.432    | 0.218     | 0.31   | 0.122     | 0.191  |
| A016047_01 | -0.037    | -0.114 | -0.438    | -0.233   | -0.103    | -0.324 | -0.263    | -0.189 |
| A016048_01 | -0.396    | -0.706 | -0.436    | -0.69    | -0.101    | -0.292 | 0.051     | -0.246 |
| A016051_01 | -1.126    | -1.235 | -0.904    | -0.716   | -0.433    | -0.565 | 0.136     | 0.094  |
| A016052_01 | 0.387     | 0.433  | 0.131     | 0.049    | 0.186     | 0.169  | -0.032    | -0.254 |
| A016055_01 | -0.539    | -0.505 | -0.939    | -1.092   | -0.251    | -0.376 | -0.405    | -0.28  |
| A016059_01 | 0.103     | 0.164  | 0.133     | -0.337   | -0.018    | -0.042 | 0.118     | -0.006 |
| A016062_01 | -0.28     | -0.325 | -0.002    | 0.486    | -0.206    | -0.479 | -0.001    | -0.104 |
| A016066_01 | 0.336     | 0.28   | 0.138     | 0.205    | -0.2      | -0.161 | -0.049    | -0.093 |
| A016068_01 | 0.355     | -0.047 | 0.014     | 0.152    | 0.182 NA  |        | -0.02     | -0.183 |
| A016069_01 | 0.187     | 0.203  | -0.108    | 0.029    | -0.119    | -0.076 | -0.134    | -0.066 |
| A016070_01 | 0.236     | 0.214  | 0.254     | -0.632   | 0.099     | 0.139  | 0.021     | 0.15   |
| A016072_01 | 0.614     | 0.514  | -0.021    | -0.271   | 0.093     | 0.368  | -0.058    | -0.05  |
| A016073_01 | 0.162     | 0.069  | -0.313    | 0.184    | -0.073    | -0.153 | -0.339    | -0.143 |
| A016075_01 | 0.581     | 0.562  | 0.237     | -0.176   | 0.227     | 0.46   | 0.068     | 0.046  |
| A016083_01 | -1.505    | -1.599 | -0.647    | -0.553   | -1.732    | -2.245 | -1.163    | -0.897 |
| A016095_01 | 0.836     | 0.916  | 0.332     | -0.021   | 0.365     | 0.387  | 0.174     | 0.079  |
| A016099_01 | 0.062     | 0.048  | -0.205    | 0.172    | 0.028     | -0.048 | -0.135    | -0.269 |
| A016101_01 | 0.09      | 0.02   | -0.089    | -0.057   | 0.3       | 0.259  | 0.01      | 0.056  |
| A016103_01 | 0.254     | 0.303  | 0.169     | -0.403   | 0.312     | 0.409  | 0.015     | -0.05  |
| A016104_01 | 0.266     | 0.235  | 0.267     | 0.14     | -0.079    | -0.185 | -0.029    | 0.025  |
| A016105_01 | 0.373     | 0.259  | 0.481     | 0.099    | -0.148    | -0.129 | -0.036    | 0.155  |
| A016108_01 | -0.337    | -0.46  | 0.124     | -0.467   | -0.126    | -0.017 | -0.075    | -0.187 |
| A016113_01 | 0.288     | 0.55   | 0.088     | 0.217    | -0.031    | 0.13   | -0.101    | 0.001  |
| A016117_01 | 0.185     | 0.02   | 0.126     | 0.069    | 0.22      | 0.179  | 0.043     | 0.154  |
| A016119_01 | 0.908     | 0.687  | 0.276     | -0.799   | 0.238     | 0.419  | 0.212     | 0.1    |
| A016120_01 | -0.123 NA |        | -0.573    | 0.04     | 0.149     | -0.177 | -0.229 NA |        |
| A016123_01 | -0.335    | -0.292 | 0.795     | -0.076   | -0.135    | -0.199 | 0.138     | 0.169  |
| A016125_01 | -0.26     | -0.411 | -0.081    | 0.369    | -0.044    | -0.277 | 0.221     | 0.228  |
| A016126_01 | -0.084    | -0.094 | -0.153    | 0.594    | 0.072     | -0.036 | -0.31     | -0.132 |
| A016127_01 | -0.843 NA | NA     |           | -0.743   | -0.363 NA |        | -0.408 NA |        |
| A016130_01 | 0.161     | -0.005 | 0.467     | -0.072   | -0.199    | -0.178 | 0.178     | 0.002  |
| A016131_01 | 0.029     | -0.025 | 0.037     | 0.346    | 0.22      | 0.167  | -0.073    | -0.095 |
| A016134_01 | 0.115     | -0.082 | -0.054    | 0.56     | -0.019 NA |        | -0.195 NA |        |
| A016139_01 | 0.327     | 0.355  | 0.407     | -0.106   | 0.031     | 0.174  | 0.254     | 0.121  |
| A016141_01 | -0.022    | -0.113 | -0.198    | -0.996   | 0.602     | 0.509  | 0.283     | 0.103  |
| A016147_01 | 0.057     | 0.035  | 0.245     | 0.466    | 0.617     | 0.711  | 0.748     | 0.694  |
| A016148_01 | 0.085     | 0.212  | -0.214    | -0.819   | -0.063    | 0.595  | -0.267    | 0.116  |
| A016157_01 | 0.287     | 0.39   | 0.035     | -0.237   | 0.203     | 0.193  | -0.057    | -0.143 |
| A016163_01 | -0.347    | -0.592 | -0.292    | 0.38     | -0.229    | -0.236 | -0.214    | -0.245 |
| A016169_01 | -0.069    | -0.243 | -0.276    | -0.29    | -0.244    | -0.004 | 0.004     | -0.072 |
| A016172_01 | -0.213    | -0.278 | -0.316    | -0.086   | -0.023    | 0.016  | -0.013    | 0.075  |
| A016173_01 | 0.197     | 0.011  | 0.145     | 0.81     | 0.088     | -0.137 | -0.394 NA |        |
| A016174_01 | -0.106    | 0.085  | 0.082     | 0.343    | 0.004     | 0.03   | -0.117    | 0.044  |
| A016175_01 | -0.079    | -0.236 | 0.417     | 0.385    | -0.465    | -0.981 | -0.156    | -0.186 |
| A016177_01 | 0.299     | 0.311  | 0.861     | 0.535    | 0.082     | 0.011  | 0.78      | 0.445  |
| A016183_01 | -0.14     | -0.111 | -0.329    | -0.055   | -0.164    | -0.37  | -0.347    | -0.232 |
| A016186_01 | -0.507    | -0.511 | -0.286    | -0.553   | 0.086     | 0.052  | -0.02     | 0.019  |
| A016187_01 | 0.457     | 0.5    | -0.248    | 0.129    | -0.08     | 0.014  | -0.275    | -0.127 |
| A016191_01 | 0.14      | 0.355  | 0.338     | 0.489    | -0.02     | 0.001  | 0.198     | 0.219  |
| A016192_01 | -0.011    | -0.077 | -0.171    | 0.026    | 0.16      | 0.127  | 0.128     | -0.068 |
| A016193_01 | 0.109     | 0.185  | -0.026    | 0.223    | 0.314     | 0.714  | 0.046     | 0.285  |
| A016195_01 | 0.106     | -0.248 | 0.001     | 0.409    | 0.202     | -0.113 | 0.046     | -0.273 |
| A016197_01 | 0.069     | -0.039 | -0.049    | 0.259    | -0.079    | -0.23  | -0.081 NA |        |
| A016198_01 | 0.353     | 0.424  | -0.143    | 0.201    | -0.059    | 0.24   | 0.041     | -0.161 |
| A016199_01 | 0.561     | 0.349  | 0.317     | -0.564   | 0.203     | 0.176  | 0.435     | 0.287  |
| A016201_01 | -0.375    | -0.206 | -0.054    | 0.017    | -0.352    | -0.434 | -0.181    | -0.089 |
| A016202_01 | 0.654     | 0.666  | 0.002     | 0.104    | 0.197     | 0.465  | -0.155    | -0.121 |
| A016207_01 | -0.109    | -0.076 | 0.18      | 0.14     | 0.075     | 0.033  | 0.184     | 0.234  |

|            |           |           |           |        |          |        |           |        |
|------------|-----------|-----------|-----------|--------|----------|--------|-----------|--------|
| A016209_01 | 0.326     | 0.602     | 0.365     | 0.603  | 0.441    | 0.831  | 0.35      | 0.384  |
| A016210_01 | 0.491     | 0.274     | -0.064    | -0.359 | 0.308    | 0.504  | -0.233    | -0.377 |
| A016211_01 | -0.502    | -0.497    | -0.362    | -0.134 | -0.375   | -0.623 | -0.508    | -0.428 |
| A016215_01 | -0.547    | -0.731    | 0.048     | -0.129 | -0.263   | -0.445 | -0.243    | -0.112 |
| A016216_01 | -0.188 NA |           | -0.937    | -1.012 | -0.19 NA |        | -0.614    | -0.584 |
| A016221_01 | -0.641    | -0.252    | -0.165    | -0.157 | -0.189   | 0.03   | -0.274    | 0.065  |
| A016222_01 | -0.484    | -0.594    | -0.851    | -0.164 | 0.006    | -0.109 | 0.061     | 0.063  |
| A016226_01 | 0.318     | 0.102     | -0.458    | -0.193 | -0.323   | -0.105 | -0.407    | -0.465 |
| A016227_01 | 0.162     | 0.259     | 0.526     | 0.688  | 0.553    | 0.522  | 0.71      | 0.676  |
| A016229_01 | -0.534    | -0.4      | -0.573    | -0.925 | -0.432   | -0.239 | 0.016     | 0.069  |
| A016232_01 | 0.111     | -0.122    | -0.169    | 0.201  | 0.096    | -0.056 | 0.057 NA  |        |
| A016233_01 | 0.76      | 0.828     | 0.452     | 0.022  | 0.148    | 0.433  | 0.124     | 0.073  |
| A016234_01 | -1.042    | -1.257    | 0.345     | 1.08   | -0.036   | -0.203 | 0.592 NA  |        |
| A016238_01 | -2.205    | -2.597    | -2.194    | -2.063 | -2.098   | -2.256 | -1.293    | -1.079 |
| A016240_01 | -0.325    | -0.398 NA |           | -0.832 | 0.173    | -0.042 | 0.008     | -0.099 |
| A016244_01 | 0.284     | 0.269     | 0.364     | 0.393  | -0.045   | 0.013  | -0.071    | -0.13  |
| A016247_01 | 0.092     | -0.011    | 0.44      | 0.088  | 0.062    | -0.039 | 0.372     | 0.255  |
| A016250_01 | -0.154    | 0.146     | 0.022     | -0.143 | -0.425   | -0.067 | -0.26 NA  |        |
| A016255_01 | -0.508    | -0.681    | -0.229    | -0.174 | -0.106   | -0.386 | -0.122 NA |        |
| A016260_01 | 0.121     | 0.141     | 0.129     | -0.018 | 0.1      | 0.001  | 0.042     | -0.203 |
| A016266_01 | -0.107    | -0.318    | -0.237    | 0.008  | 0.168    | 0.136  | -0.312    | -0.445 |
| A016267_01 | -0.374    | -0.417    | 0.356     | 0.498  | 0.368    | 0.209  | 0.351     | 0.289  |
| A016269_01 | -0.305    | -0.265 NA |           | -0.417 | 0.099    | 0.201  | 0.153     | 0.256  |
| A016271_01 | 0.167     | -0.027    | 0.168     | 0.091  | 0.294    | 0.248  | 0.204     | -0.009 |
| A016272_01 | 0.043     | 0.054     | -0.036    | -0.427 | 0.094    | 0.263  | -0.06     | -0.057 |
| A016274_01 | 0.524     | 0.444     | -0.027    | 0.163  | 0.265 NA |        | -0.04     | 0.024  |
| A016275_01 | 0.094     | 0.005     | 0.267     | -0.169 | 0.023    | 0.163  | 0.088     | 0.15   |
| A016278_01 | -0.023    | -0.007    | -0.951    | -0.744 | -0.56    | -0.505 | -0.77     | -0.569 |
| A016281_01 | -0.076    | 0.112     | -0.148    | 0.278  | 0.14     | 0.65   | 0.293     | 0.354  |
| A016282_01 | -0.98     | -1.358 NA | NA        |        | -0.12    | -0.475 | -0.142 NA |        |
| A016283_01 | 0.098     | 0.266     | 0.048     | -0.162 | 0.118    | -0.005 | 0.01      | -0.14  |
| A016285_01 | 0.242     | 0.128     | 0.49      | 0.317  | 0.308    | 0.169  | -0.018    | -0.033 |
| A016286_01 | 0.045     | -0.155 NA | NA        |        | 0.156    | 0.036  | 0.202 NA  |        |
| A016291_01 | -0.279    | -0.299    | -0.109    | 0.082  | 0.086    | -0.147 | -0.096    | -0.157 |
| A016297_01 | 0.248     | 0.509     | 0.017     | 0.116  | -0.152   | 0.128  | -0.493 NA |        |
| A016301_01 | 0.325     | 0.339     | -0.157    | -0.085 | 0.031    | 0.187  | -0.036    | -0.049 |
| A016303_01 | -0.1      | -0.086    | -0.39     | -0.175 | -0.222   | -0.308 | -0.178    | -0.191 |
| A016306_01 | 0.136     | 0.174     | 0.106     | 0.326  | -0.055   | -0.187 | -0.043    | -0.116 |
| A016309_01 | 0.036     | 0.262     | -0.006    | 0.124  | 0.071    | 0.108  | 0.04      | -0.006 |
| A016312_01 | 0.022     | 0.026     | 0.166     | -0.396 | 0.13     | 0.037  | 0.182     | 0.004  |
| A016314_01 | -0.11     | -0.22     | -0.118    | -0.114 | 0.019    | -0.063 | 0.058     | 0.065  |
| A016316_01 | 0.388     | 0.56      | 0.338     | 0.105  | 0.14     | 0.107  | 0.128 NA  |        |
| A016317_01 | 0.012     | -0.012    | -0.044    | -0.028 | -0.05    | -0.083 | -0.191    | -0.131 |
| A016319_01 | 0.751     | 0.678     | 0.936     | 1.255  | 0.744    | 0.723  | 0.255     | 0.054  |
| A016320_01 | -0.147    | -0.28     | -0.372    | -0.001 | -0.01    | -0.123 | -0.217    | -0.15  |
| A016321_01 | 0.158     | -0.029    | -0.142    | -1.427 | 0.005    | -0.041 | -0.177    | -0.314 |
| A016322_01 | 0.328     | 0.783     | 0.153     | 0.377  | 0.086    | 0.077  | -0.61     | -0.459 |
| A016323_01 | -0.223    | -0.362    | -0.244    | -0.255 | -0.158   | -0.137 | 0.081     | 0.027  |
| A016324_01 | 0.646     | 0.62      | 0.826     | 1.44   | 0.575    | 0.617  | -0.24     | -0.166 |
| A016325_01 | 0.203     | 0.152     | -0.324    | -0.136 | -0.008   | 0.024  | -0.114    | -0.08  |
| A016327_01 | 0.004     | -0.003    | 0.063     | 0.251  | 0.041    | 0.206  | 0.172     | 0.11   |
| A016330_01 | -0.088    | -0.216    | 0.031     | -0.46  | 0.297    | 0.149  | -0.005    | -0.132 |
| A016331_01 | -0.063    | 0.087     | 0.295     | 0.288  | -0.06    | -0.181 | 0.001     | 0.111  |
| A016332_01 | -0.164    | 0.032     | -0.741    | 0.556  | 0.171    | 0.141  | -0.473 NA |        |
| A016333_01 | -0.333 NA | NA        | NA        |        | 0.161    | -0.174 | 0.29      | -0.021 |
| A016335_01 | 0.639     | 0.52      | 0.263     | 0.657  | 0.054    | -0.122 | 0.005     | -0.158 |
| A016337_01 | -1.099    | -1.331    | -0.528    | -0.419 | -0.447   | -0.471 | 0.004     | 0.021  |
| A016340_01 | -0.477    | -0.684    | -0.145 NA |        | -0.063   | -0.274 | -0.092 NA |        |
| A016344_01 | 0.392     | 0.361     | -0.078    | 0.232  | -0.083   | -0.149 | -0.172    | -0.272 |
| A016347_01 | 0.529 NA  |           | -0.193    | -0.409 | 0.164 NA |        | -0.125    | -0.291 |
| A016351_01 | 0.047     | 0.051     | -0.059    | 0.017  | -0.083   | -0.132 | -0.06 NA  |        |
| A016354_01 | 0.05      | 0.03      | 0.365     | -0.081 | 0.254    | 0.052  | 0.115     | -0.039 |
| A016359_01 | 0.665     | 0.459     | 0.452     | 0.612  | 0.532    | 0.783  | 0.404     | 0.199  |
| A016360_01 | 0.068     | 0.262     | -0.031    | 0.102  | -0.103   | 0.09   | -0.001    | 0.101  |
| A016362_01 | 0.667     | 0.589     | 0.526     | 0.175  | 0.416    | 0.359  | 0.176 NA  |        |
| A016363_01 | 0.207     | 0.04      | 0.157     | -0.238 | 0.164    | 0.153  | 0.236     | 0.007  |
| A016364_01 | 0.375     | -0.018    | 0.309     | -0.421 | 0.335    | 0.474  | -0.575    | -0.431 |
| A016367_01 | 0.411     | 0.198     | -0.546    | -0.478 | -0.221   | 0.218  | -0.315    | -0.189 |

|            |           |          |           |           |           |        |           |        |
|------------|-----------|----------|-----------|-----------|-----------|--------|-----------|--------|
| A016368_01 | 0.033     | 0.329    | -0.495    | -1.348    | 0.29      | 0.968  | -0.633    | -0.62  |
| A016369_01 | 0.323     | 0.351    | -0.03     | 0.349     | 0.236     | 0.204  | 0.191     | 0.01   |
| A016370_01 | -0.417    | -0.257   | 0.113     | -0.533    | 0.056     | 0.073  | -0.022    | 0.022  |
| A016372_01 | 0.644     | 0.794    | 0.862     | 0.104     | -0.027    | 0.102  | -0.151    | -0.141 |
| A016373_01 | 0.729     | 0.55     | -0.128    | -0.013    | 0.247     | 0.263  | -0.206    | -0.475 |
| A016374_01 | -0.256    | -0.313   | 0.242     | -0.201    | -0.171    | -0.341 | -0.035    | -0.029 |
| A016376_01 | 0.053     | 0.038    | 0.525     | 0.126     | -0.147    | -0.271 | -0.018    | 0.038  |
| A016378_01 | 0.094     | -0.027   | 0.255     | 0.05      | 0.186     | 0.016  | 0.106     | -0.332 |
| A016380_01 | 0.016     | -0.091   | -0.448    | 0.012     | 0.075     | -0.058 | -0.193 NA |        |
| A016382_01 | 0.736     | 0.435    | -0.305    | -0.506    | 0.236     | 0.164  | -0.138    | -0.183 |
| A016383_01 | -0.073    | 0.097    | 0.307     | -0.062    | -0.009    | 0.182  | 0.052     | 0.089  |
| A016384_01 | 0.113     | 0.102    | 0.275     | 0.19      | 0.066     | -0.048 | -0.025    | -0.049 |
| A016385_01 | -0.133    | -0.367   | -0.199    | -0.179    | 0.177     | -0.061 | -0.238    | -0.416 |
| A016390_01 | 0.1       | 0.013    | -0.095    | -0.055    | -0.185    | -0.295 | -0.085    | -0.087 |
| A016393_01 | -1.297    | -1.646   | -0.893    | -1.094    | -0.199    | -0.263 | -0.024    | 0.093  |
| A016394_01 | 0.47      | 0.252    | 0.157     | -0.041    | 0.222     | 0.455  | 0.045     | -0.017 |
| A016399_01 | -0.126    | -0.337   | 0.264     | 0.252     | -0.189    | -0.308 | -0.114    | -0.156 |
| A016402_01 | -4.425    | -4.147   | -1.915    | -2.629    | -3.706    | -3.731 | -1.77     | -1.146 |
| A016407_01 | 0.247     | -0.005   | 0.216     | 0.035     | 0.425     | 0.383  | 0.336     | 0.119  |
| A016408_01 | 0.468     | 0.483    | 0.155     | -0.244    | 0.361     | 0.385  | 0.042     | -0.028 |
| A016411_01 | 0.123     | 0.327    | 0.119     | -0.336    | -0.191    | 0.075  | -0.244    | 0.017  |
| A016412_01 | 0.852     | 0.524    | 0.053     | -0.349    | 0.214     | 0.327  | 0.191     | 0.085  |
| A016416_01 | -0.141    | 0.108    | -0.192    | -0.158    | 0.177     | 0.439  | -0.264 NA |        |
| A016417_01 | 0.217     | 0.231    | 0.547     | 0.058     | 0.355     | 0.461  | 0.121     | 0.05   |
| A016419_01 | 0.054 NA  |          | -0.017    | -0.233    | -0.148 NA |        | 0.124     | 0.276  |
| A016420_01 | 0.935     | 0.733    | 0.028     | 0.568     | 0.266     | 0.463  | -0.004    | -0.012 |
| A016421_01 | 0.442     | 0.365    | -0.385    | -0.512    | 0.141     | 0.294  | -0.068    | -0.119 |
| A016422_01 | 0.747     | 0.501    | 0.148     | 0.051     | -0.211    | 0.383  | 0.104     | -0.059 |
| A016423_01 | -0.602    | -0.563   | -0.647    | -0.522    | -0.257    | -0.21  | -0.205 NA |        |
| A016425_01 | -0.177    | 0.069    | -0.079    | -0.706    | -0.054    | 0.138  | -0.193    | -0.243 |
| A016426_01 | -0.574    | -0.284   | -0.235    | -0.03     | -0.084    | 0.013  | -0.249    | 0.018  |
| A016431_01 | -0.291    | -0.605   | -0.576    | 0.142     | -0.179    | -0.532 | -0.217    | -0.243 |
| A016432_01 | 0.551     | 0.558    | 0.432     | -0.203    | 0.292     | -0.098 | 0.09      | -0.139 |
| A016442_01 | -0.803    | -0.86 NA |           | NA        | -0.008    | -0.032 | 0.641     | 0.205  |
| A016443_01 | -0.124    | -0.165   | 0.038     | -0.221    | -0.106    | 0.039  | 0.068     | -0.017 |
| A016444_01 | 0.457     | 0.329    | 0.174     | 0.048     | 0.078     | 0.161  | -0.047    | -0.287 |
| A016446_01 | -1.55     | -2.127   | -0.491    | -0.723    | -1.797    | -2.272 | -3.816 NA |        |
| A016447_01 | -0.327 NA |          | 0.058     | -0.027    | -0.208 NA |        | 0.148     | -0.084 |
| A016449_01 | 0.303     | 0.14     | 0.317     | -0.211    | 0.521     | 0.386  | 0.288     | 0.138  |
| A016453_01 | 0.572     | 0.447    | 0.012     | 0.006     | 0.112     | 0.1    | 0.006     | -0.124 |
| A016456_01 | 0.329 NA  |          | 0.022     | 0.017     | 0.353 NA  |        | 0.139     | -0.117 |
| A016458_01 | -0.316    | 0.009    | -0.475    | 0.477     | -0.149    | -0.246 | -0.051    | -0.154 |
| A016459_01 | 0.604     | 0.389    | 0.082     | -0.416    | 0.13      | 0.215  | 0.217     | 0.093  |
| A016460_01 | 0.133     | 0.121    | 0.482     | 0.001     | -0.008    | -0.037 | 0.183 NA  |        |
| A016462_01 | -1.581 NA |          | -2.465 NA |           | -1.418    | -1.594 | -0.565    | -0.396 |
| A016463_01 | -0.537    | -0.869   | -1.049    | -0.713    | -0.47     | -0.514 | -0.397    | -0.521 |
| A016465_01 | 0.202     | 0.028    | 0.262     | -0.009    | 0.078     | 0.08   | 0.14      | -0.052 |
| A016466_01 | 0.212     | 0.145    | 0.382     | 0.527     | -0.231    | -0.441 | -0.12     | -0.245 |
| A016472_01 | -0.868    | -0.83 NA |           | NA        | 0.01      | -0.068 | 0.039 NA  |        |
| A016473_01 | -1.246    | -0.978   | -0.14     | -0.406    | -0.891    | -0.843 | -0.419    | -0.287 |
| A016476_01 | -0.444    | -0.862   | -1.164    | -1.411    | -1.072 NA |        | -0.379    | -0.315 |
| A016478_01 | 0.528     | 0.37     | 0.123     | 0.021     | 0.115     | -0.014 | 0.123     | -0.073 |
| A016483_01 | 0.435     | 0.24     | -0.183    | 0.221     | 0.085     | -0.056 | -0.15     | -0.2   |
| A016484_01 | -0.164    | -0.607   | 0.009     | 0.606     | -0.186    | -0.448 | -0.038    | -0.284 |
| A016494_01 | -0.024    | -0.271   | 0.335     | 0.046     | 0.112     | -0.255 | -0.07 NA  |        |
| A016502_01 | -0.044    | 0.201    | 0.436     | 0.62      | 0.252     | 0.246  | 0.098     | 0.166  |
| A016509_01 | -0.199    | -0.47    | 0.393     | 0.638     | -0.129    | -0.425 | -0.138    | -0.174 |
| A016510_01 | 0.31      | 0.197    | 0.69      | 0.259     | -0.202    | -0.43  | 0.388     | 0.375  |
| A016511_01 | -0.496    | -0.435   | -0.054    | -0.151    | -0.202    | -0.011 | -0.01     | 0.157  |
| A016514_01 | 0.108     | 0.072    | 0.002     | 0.125     | -0.02 NA  |        | 0.055     | -0.083 |
| A016516_01 | 0.412     | 0.267    | 0.211     | -0.561    | 0.342     | 0.312  | 0.21      | -0.01  |
| A016520_01 | -0.743 NA |          | NA        | -0.118    | -0.047 NA |        | 0.188     | 0.101  |
| A016536_01 | -0.434    | -0.912   | -1.269    | -0.925    | -0.562    | -1.062 | -0.983    | -0.722 |
| A016553_01 | -0.321    | -0.292   | 0.059     | -0.051    | -0.017    | -0.027 | 0.195     | 0.047  |
| A016565_01 | -0.314    | -0.508   | -0.375    | 0.184     | -0.108    | -0.222 | -0.177 NA |        |
| A016567_01 | 0.095     | 0.112    | 0.198     | -0.067 NA |           | NA     | 0.017     | 0.077  |
| A016575_01 | -1.385    | -1.569   | -0.002    | -0.372    | -0.554    | -0.625 | 0.305     | 0.255  |
| A016578_01 | -1.356    | -1.879   | -0.852 NA |           | -1.358    | -1.91  | 0.255     | 0.07   |



|            |          |           |        |           |           |        |           |        |
|------------|----------|-----------|--------|-----------|-----------|--------|-----------|--------|
| A016580_01 | -0.531   | -0.605    | -0.216 | -0.002    | -0.102    | -0.163 | -0.021    | -0.067 |
| A016585_01 | 0.742    | 0.645     | 0.409  | -0.099    | 0.197     | 0.244  | 0.092     | 0.024  |
| A016586_01 | 0.041    | -0.282    | -0.565 | -0.236    | -0.72 NA  |        | -0.47     | -0.456 |
| A016588_01 | -2.819   | -3.161    | -1.284 | -1.554    | -1.837    | -2.423 | 0.324     | 0.404  |
| A016591_01 | 0.185    | 0.263     | 0.083  | 0.251     | -0.109    | -0.161 | -0.093    | -0.116 |
| A016592_01 | -0.054   | -0.143    | 0.095  | -0.254    | 0.2       | 0.101  | 0.024     | -0.144 |
| A016597_01 | 0.105    | 0.089     | 0.293  | 0.742     | 0.336     | 0.234  | -0.208    | -0.26  |
| A016605_01 | 0.084    | -0.136    | 0.047  | -0.146    | 0.204     | 0.169  | 0.151     | -0.011 |
| A016612_01 | -0.217   | -0.23     | -0.081 | -0.197    | 0.205     | -0.007 | -0.025 NA |        |
| A016615_01 | -2.335   | -2.626 NA |        | -1.968    | -1.562    | -1.933 | -1.64     | -1.177 |
| A016618_01 | 0.323    | 0.119     | -0.408 | -0.847    | 0.059     | -0.067 | -0.614    | -0.603 |
| A016623_01 | -0.107   | 0.076     | -0.008 | -0.1      | 0.027     | -0.193 | -0.085    | 0.024  |
| A016625_01 | -0.136   | -0.137    | -0.286 | 0.086     | -0.167    | -0.495 | -0.242    | -0.27  |
| A016628_01 | -1.012   | -1.534    | -0.41  | -0.675    | -0.448    | -0.602 | -0.255    | -0.376 |
| A016631_01 | 0.127    | -0.086    | -0.021 | 0.228     | -0.019    | -0.2   | -0.039    | -0.134 |
| A016633_01 | 0.307    | 0.367     | 0.532  | 0.094     | -0.013    | 0.059  | -0.005    | -0.14  |
| A016638_01 | -0.115   | -0.191    | -0.095 | -0.061    | 0.023     | -0.025 | 0.048     | -0.04  |
| A016644_01 | -0.451   | -0.674    | -0.288 | -0.435    | 0.352     | 0.171  | 0.436     | 0.023  |
| A016645_01 | -0.191   | -0.191    | 0.243  | -0.343 NA |           | 0.126  | 0.173     | -0.065 |
| A016649_01 | 0.487    | 0.235     | -0.001 | -0.217    | 0.085     | 0.092  | -0.004    | -0.121 |
| A016650_01 | -0.191   | -0.529    | 0.112  | 0.182     | -0.15     | -0.514 | -0.236    | -0.128 |
| A016651_01 | 0.151    | 0.061     | 0.049  | -0.439    | 0.286     | 0.056  | 0.046     | -0.158 |
| A016652_01 | -0.524   | -0.718    | -0.114 | -0.487    | -0.359    | -0.396 | -0.522    | -0.509 |
| A016656_01 | -0.228   | -0.128    | -0.114 | -0.03     | -0.006    | 0.025  | -0.167    | -0.21  |
| A016658_01 | 0.332 NA |           | -0.627 | -0.271 NA | NA        |        | 0.047     | -0.105 |
| A016661_01 | 0.555    | 0.536     | 0.251  | -0.709    | 0.418     | 0.54   | 0.332     | 0.28   |
| A016662_01 | 0.456    | 0.416     | 0.348  | 0.15      | 0.087     | 0.023  | 0.004     | -0.018 |
| A016664_01 | 0.254    | 0.212     | 0.575  | 0.121     | 0.145     | -0.057 | 0.099     | 0.135  |
| A016665_01 | 0.542    | 0.372     | -0.194 | 0.431 NA  | NA        |        | -0.077    | 0.031  |
| A016673_01 | 0.508    | 0.291     | 0.875  | 0.851     | 0.112     | 0.013  | 0.525     | 0.125  |
| A016676_01 | 0.396    | 0.299     | 0.334  | 0.841     | -0.646    | -1.263 | -0.181    | -0.409 |
| A016682_01 | -0.519   | -0.582    | 0.106  | 0.256     | 0.184     | 0.014  | 0.159     | -0.134 |
| A016696_01 | 0.007    | -0.122    | -0.286 | -0.028    | -0.061    | -0.075 | -0.001    | -0.259 |
| A016697_01 | 0.173    | 0.214     | 0.316  | 0.02      | 0.298     | 0.468  | 0.282     | 0.061  |
| A016703_01 | -0.108   | -0.032    | 0.151  | -0.136    | 0.098     | 0.219  | -0.071    | -0.099 |
| A016705_01 | -0.559   | -0.42     | -0.513 | 0.238     | -0.394    | -0.425 | -0.281    | -0.141 |
| A016715_01 | -0.255   | -0.375 NA |        | 0.282     | -0.097    | 0.002  | -0.172    | -0.003 |
| A016721_01 | -0.823   | -0.425 NA |        | 0.26      | -0.288 NA |        | 0.016     | 0.064  |
| A016723_01 | 0.5      | 0.577     | 0.08   | -0.234    | -0.093 NA |        | 0.259     | -0.144 |
| A016728_01 | -0.071   | -0.037    | 0.075  | 0.59      | 0.218     | 0.056  | -0.103    | -0.179 |
| A016731_01 | -0.478   | -0.354    | -0.165 | -0.33     | -0.101    | -0.115 | -0.221    | -0.323 |
| A016735_01 | -0.28    | -0.57     | -0.417 | -0.185    | 0.072     | -0.188 | 0.194     | -0.094 |
| A016736_01 | -0.561   | -0.693    | -0.22  | -0.097    | -0.271    | -0.885 | 0.024 NA  |        |
| A016738_01 | -0.021   | -0.206    | -0.498 | -0.008    | -0.017    | -0.206 | 0.031     | 0.096  |
| A016740_01 | 0.351    | 0.147     | 0.018  | -0.466    | 0.223     | 0.295  | 0.103     | 0.066  |
| A016742_01 | -0.373   | -0.241    | 0.011  | 0.138     | 0.019     | 0.02   | 0.144     | 0.076  |
| A016750_01 | 0.156    | 0.115     | -0.543 | -0.551    | 0.061     | 0.187  | -0.3      | -0.181 |
| A016751_01 | -0.235   | -0.296    | -0.186 | 0.008     | -0.17     | -0.299 | -0.201    | -0.098 |
| A016752_01 | 0.026    | -0.052    | 0.049  | -0.295    | 0.187     | 0.022  | 0.133     | 0.084  |
| A016754_01 | 0.425    | 0.095     | 0.312  | 0.404     | -0.45     | -1.099 | -0.949 NA |        |
| A016756_01 | 0.24     | 0.018     | -0.264 | -0.109    | 0.052     | 0.161  | -0.116    | -0.167 |
| A016761_01 | 0.339    | 0.355     | 0.452  | 0.937     | 0.199     | 0.173  | 0.038     | 0.083  |
| A016762_01 | -1.131   | -1.483    | -1.914 | -1.971    | -0.836    | -1.273 | -0.382    | -0.306 |
| A016767_01 | -0.395   | -0.104    | -0.104 | 0.417     | -0.097    | -0.09  | -0.166 NA |        |
| A016786_01 | 0.401    | 0.312     | 0.14   | -0.253    | 0.05      | 0.376  | 0.343     | 0.227  |
| A016794_01 | 0.026    | -0.321    | -0.233 | 0.224     | 0.06 NA   |        | -0.096    | -0.083 |
| A016797_01 | -0.465   | -0.58     | -0.263 | 0.185     | -0.165    | -0.256 | -0.112    | -0.127 |
| A016803_01 | 0.095    | 0.113     | 0.103  | 0.023     | 0.159     | 0.114  | 0.291 NA  |        |
| A016804_01 | -0.009   | 0.042     | 0.132  | -0.271    | 0.019     | 0.012  | -0.083    | -0.108 |
| A016809_01 | 0.166    | -0.014    | -0.055 | -0.384    | 0.122     | 0.111  | -0.095 NA |        |
| A016812_01 | 0.007    | -0.163    | 0.635  | 0.113     | 0.318     | 0.162  | 0.208     | 0.109  |
| A016813_01 | 0.667    | 0.653     | 0.218  | -0.405    | 0.313 NA  |        | 0.071     | 0.019  |
| A016817_01 | 0.662    | 0.531     | 0.062  | 0.63      | 0.116     | 0.041  | -0.383    | -0.335 |
| A016820_01 | 0.274    | -0.006    | -0.016 | -0.201    | 0.103     | -0.033 | 0.26      | 0.144  |
| A016827_01 | 0.163    | -0.076    | 0.375  | 0.262     | -0.077    | -0.297 | -0.261    | -0.301 |
| A016830_01 | -0.063   | -0.251    | 0.045  | -1.236    | 0.099     | 0.19   | -0.049    | -0.076 |
| A016832_01 | -0.257   | -0.2      | -0.01  | 0.365     | -0.053    | -0.388 | -0.244 NA |        |
| A016836_01 | -1.322   | -1.444    | -0.699 | -0.867    | -0.576    | -0.706 | -0.207    | -0.13  |

|            |           |          |          |           |           |          |           |        |
|------------|-----------|----------|----------|-----------|-----------|----------|-----------|--------|
| A016838_01 | -0.311    | -0.237   | 0.172    | -0.184    | 0.183     | 0.053    | -0.327    | -0.174 |
| A016839_01 | -1.107    | -1.113   | -0.847   | -0.633    | -0.216    | -0.22    | 0.043     | -0.037 |
| A016845_01 | 0.645 NA  |          | 0.335    | -0.604 NA | NA        |          | 0.389     | 0.251  |
| A016847_01 | 0.419     | 0.267    | 0.543    | 0.674     | 0.206     | 0.018    | -0.695    | -0.498 |
| A016851_01 | 0.329     | 0.222    | -0.117   | 0.087     | 0.488     | 0.49     | -0.035    | -0.097 |
| A016853_01 | -0.633    | -0.651   | -0.302   | 0.144     | -0.6      | -0.491   | -0.131    | 0.083  |
| A016860_01 | -0.003    | 0.026    | 0.261    | 0.735     | -0.054    | -0.36    | 0.218 NA  |        |
| A016868_01 | 0.26      | 0.141    | 0.001    | -0.375    | 0.329 NA  |          | 0.006 NA  |        |
| A016869_01 | 0.235     | 0.36     | 0.171    | 0.309     | 0.033     | -0.076   | -0.185    | -0.098 |
| A016873_01 | -0.034    | -0.064   | -0.214   | 0.195     | 0.054     | -0.05    | -0.082    | -0.106 |
| A016875_01 | 0.232     | 0.152    | -0.029   | -0.398    | 0.091     | -0.008   | -0.022    | -0.216 |
| A016880_01 | 0.636     | 0.536    | -0.069   | -0.364    | 0.183     | 0.262    | 0.111 NA  |        |
| A016883_01 | -0.147    | -0.392   | -0.245   | 0.366     | 0.114     | -0.206   | -0.099    | -0.315 |
| A016884_01 | 0.437     | 0.327    | 0.57     | 0.511     | 0.492     | 0.345    | 0.004     | -0.001 |
| A016886_01 | 0.476     | 0.577 NA | NA       |           | 0.001     | 0.062 NA | NA        |        |
| A016888_01 | -0.254 NA |          | 0.213    | -0.156    | -0.483 NA |          | -0.053    | 0.086  |
| A016894_01 | 0.381     | 0.197    | 0.229    | -0.409    | 0.346     | 0.305    | 0.189     | -0.111 |
| A016897_01 | 0.05      | -0.09    | 0.237    | 0.321     | 0.061     | -0.11    | -0.06     | -0.177 |
| A016898_01 | -0.714    | -0.593   | -0.754   | -1.147    | -0.453    | -0.526   | -0.832    | -0.71  |
| A016900_01 | -0.166    | -0.123   | 0.102    | 0.25      | 0.013     | -0.022   | 0.126     | 0.125  |
| A016901_01 | -0.011    | -0.258   | 0.038    | 0.111     | 0.015     | -0.179   | 0.155     | -0.002 |
| A016902_01 | -0.32     | -0.463   | -0.036   | -0.266    | -0.042    | -0.309   | -0.131    | -0.17  |
| A016904_01 | -0.672    | -0.669   | -0.454   | -0.696    | -0.199    | -0.159   | -0.01     | -0.068 |
| A016905_01 | 0.381     | 0.496    | 0.207    | 0.174     | 0.122     | 0.141    | 0.161     | 0.059  |
| A016907_01 | -0.283    | -0.378   | 0.042 NA |           | -0.126    | -0.495   | -0.142 NA |        |
| A016909_01 | 0.175     | -0.109   | -0.138   | 0.516     | 0.287     | 0.087    | -0.022    | -0.234 |
| A016913_01 | -0.079    | -0.131   | 0.013    | -0.347    | -0.218    | -0.216   | 0.026     | 0.094  |
| A016914_01 | -0.453    | -0.549   | -0.073   | -0.073    | -0.208    | -0.371   | -0.263    | -0.132 |
| A016915_01 | -0.201    | -0.562   | -0.313   | 0.328     | -0.067    | -0.207   | -0.071    | -0.248 |
| A016922_01 | -0.215    | -0.265   | -0.144   | -0.001    | -0.15     | -0.271   | -0.487    | -0.333 |
| A016923_01 | 0.079     | -0.166   | -0.067   | -0.309    | 0.122     | 0.009    | 0.021     | -0.089 |
| A016924_01 | 0.248     | 0.544    | 0.554    | 0.386     | 0.654     | 0.92     | 0.416     | 0.435  |
| A016925_01 | -0.684    | -1.018   | -0.714   | -0.521    | -0.503    | -0.758   | 0.019     | -0.045 |
| A016926_01 | 0.266     | 0.136    | -0.37    | 0.348     | 0.052     | 0.053    | -0.161    | 0.001  |
| A016929_01 | -0.12     | -0.161   | -0.149   | 0.324     | 0.035     | -0.251   | -0.131    | -0.281 |
| A016930_01 | -0.602    | -0.694   | -0.719   | -1.313    | -0.308    | -0.421   | -0.418    | -0.322 |
| A016931_01 | -0.274    | 0.023    | 0.088    | -0.477    | -0.038    | 0.205    | -0.015 NA |        |
| A016933_01 | -0.347    | -0.205   | -0.217   | -0.042    | -0.171    | -0.154   | -0.055    | -0.034 |
| A016936_01 | 0.143     | 0.058    | -0.023   | 0.239     | -0.059    | 0.122    | 0.148     | 0.437  |
| A016937_01 | 0.597     | 0.657    | 0.126    | -0.203    | 0.363     | 0.781    | 0.429     | 0.368  |
| A016941_01 | -0.082    | -0.007   | 0.109    | -0.073    | -0.054    | 0.065    | -0.145    | -0.094 |
| A016943_01 | -0.348    | -0.502   | -0.254   | -0.107    | -0.091    | -0.216   | 0.029     | 0.053  |
| A016946_01 | 0.164     | 0.202    | 0.323    | 0.555     | 0.454     | 0.725    | 0.05      | 0.008  |
| A016947_01 | 0.256     | 0.318    | 0.033    | 0.126     | 0.067     | 0.066    | 0.06      | -0.102 |
| A016949_01 | 0.629     | 0.601    | 0.488    | 0.379     | -0.467    | -0.67    | 0.129     | -0.011 |
| A016950_01 | -0.257    | -0.57    | 0.101    | -0.348    | 0.108     | -0.381   | 0.276     | 0.101  |
| A016951_01 | -1.536    | -1.55    | -0.905   | -0.563    | -0.735    | -0.942   | -0.341 NA |        |
| A016952_01 | 0.336     | 0.159    | 0.035    | -0.393    | 0.143     | 0.066    | 0.043     | -0.054 |
| A016954_01 | 0.593     | 0.522    | 0.045    | 0.125     | 0.259     | 0.357    | -0.11     | -0.087 |
| A016955_01 | -0.338    | -0.413   | -0.307   | -0.177    | -0.007    | -0.187   | -0.199    | -0.35  |
| A016956_01 | 0.231     | 0.32     | -0.591   | -1.045    | 0.32      | 0.353    | -0.035    | -0.205 |
| A016959_01 | 0.117     | 0.157    | -0.261   | -0.576    | 0.229     | 0.241    | 0.17      | 0.078  |
| A016960_01 | 0.385     | 0.322    | -0.279   | -0.667    | 0.135 NA  |          | 0.032     | -0.107 |
| A016966_01 | 0.116     | 0.028    | 0.025    | 0.48      | -0.17     | -0.247   | -0.278    | -0.175 |
| A016967_01 | -0.318 NA |          | -0.101   | 0.246     | 0.47 NA   |          | 0.48      | 0.345  |
| A016969_01 | -0.299    | -0.426   | -0.157   | -0.118    | -0.289    | -0.334   | 0.161     | -0.01  |
| A016971_01 | -0.123    | -0.419   | -0.512   | -0.383    | 0.319     | 0.23     | -1.312    | -1.095 |
| A016976_01 | 0.11      | -0.172   | 0.004    | 0.271     | 0.217     | 0.085    | 0.522     | 0.12   |
| A016977_01 | 0.543     | 0.381    | 0.25     | 0.562     | 0.248     | 0.076    | -0.833    | -0.607 |
| A016978_01 | -0.024    | 0.2      | -0.28    | -0.079    | 0.204     | 0.297    | 0.06      | -0.069 |
| A016979_01 | -0.138    | -0.215   | 0.031    | -0.087    | -0.274    | -0.633   | -0.135    | -0.217 |
| A016980_01 | 0.954     | 0.944    | 0.331    | 0.121     | 0.035     | 0.082    | -0.033    | -0.13  |
| A016984_01 | 0.139     | 0.023    | 0.218    | -0.165    | 0.3       | 0.06     | 0.45      | 0.172  |
| A016987_01 | -0.143    | -0.164   | 0.03     | -0.147    | -0.048    | -0.041   | 0.217     | 0.018  |
| A016991_01 | -0.455    | -0.504   | -0.065   | -0.258    | -0.248    | -0.452   | -0.127    | -0.129 |
| A016997_01 | 0.398     | 0.279    | -0.07    | -0.005    | 0.281     | 0.08     | -0.171    | -0.264 |
| A017000_01 | 0.057     | -0.028   | 0.106    | 0.323     | 0.222     | 0.192    | 0.175     | -0.056 |
| A017002_01 | 0.241     | 0.097    | -0.163   | -0.248    | 0.225     | 0.092    | 0.086     | -0.124 |

|            |           |        |        |           |           |        |           |        |
|------------|-----------|--------|--------|-----------|-----------|--------|-----------|--------|
| A017003_01 | -1.1      | -0.88  | -0.288 | -0.485    | -0.406    | -0.301 | -0.154    | -0.045 |
| A017004_01 | 0.198     | 0.161  | -0.027 | -0.35     | 0.075     | 0.162  | 0.073     | 0.027  |
| A017008_01 | -0.138 NA |        | 0.108  | -0.093    | 0.109 NA  |        | -0.008    | -0.102 |
| A017010_01 | 0.507     | 0.302  | -0.186 | 0.111     | -0.102    | 0.035  | -0.168    | -0.234 |
| A017012_01 | 0.195     | 0.111  | 0.139  | 0.196     | 0.213     | 0.182  | 0.011     | -0.094 |
| A017013_01 | -0.237    | -0.025 | -0.093 | 0.01      | 0.083     | 0.193  | 0.119     | 0.234  |
| A017015_01 | 0.291     | 0.21   | -0.199 | 0.312     | -0.011    | -0.135 | -0.093    | -0.12  |
| A017016_01 | 0.551     | 0.376  | -0.103 | 0.267     | -0.397    | -0.48  | -0.493    | -0.336 |
| A017020_01 | 0.157     | -0.042 | -0.654 | -0.603    | 0.026     | 0.024  | 0.044     | -0.192 |
| A017021_01 | -0.138    | -0.166 | -0.058 | -0.273    | 0.079     | -0.096 | 0.056     | -0.255 |
| A017022_01 | 0.199     | 0.086  | 0.058  | 0.966     | 0.046     | -0.042 | 0.138     | -0.06  |
| A017024_01 | 0.046     | -0.023 | -0.195 | -0.094    | -0.038    | 0.191  | 0.02      | 0.055  |
| A017025_01 | -0.167 NA | NA     |        | 0.02      | 0.001 NA  |        | -0.036    | -0.114 |
| A017026_01 | 0.076     | 0.155  | -0.298 | -0.105    | -0.221    | -0.051 | -0.131    | -0.146 |
| A017028_01 | 0.177     | 0.046  | 0.117  | 0.379     | -0.085    | -0.488 | -0.142    | -0.38  |
| A017031_01 | 0.394     | 0.253  | 0.109  | 0.03      | -0.002    | -0.074 | -0.06     | -0.124 |
| A017032_01 | -0.244    | -0.151 | -0.159 | -0.376    | -0.072    | -0.186 | -0.263    | -0.301 |
| A017034_01 | -0.641    | -0.65  | -0.44  | 0.116     | -0.384    | -0.263 | 0.101     | 0.159  |
| A017035_01 | -0.267    | -0.422 | -0.607 | -0.684    | 0.27      | 0      | -0.131    | -0.288 |
| A017036_01 | -0.039    | -0.039 | -0.146 | -0.161    | 0.202     | 0.291  | -0.042    | -0.122 |
| A017037_01 | -0.082    | -0.046 | 0.147  | -0.384    | 0.114     | 0.043  | 0.148     | 0.033  |
| A017038_01 | 0.557     | 0.332  | 0.628  | 1.044     | -1.963    | -1.922 | -1.183    | -0.902 |
| A017040_01 | 0.603     | 0.673  | 0.289  | -0.269    | 0.037     | 0.504  | 0.057     | 0.072  |
| A017041_01 | 0.406     | 0.319  | 0.188  | -0.42     | 0.174     | 0.409  | 0.155     | 0.178  |
| A017042_01 | -0.135    | -0.236 | -0.054 | -0.013    | -0.476    | -0.909 | -0.389    | -0.521 |
| A017044_01 | 0.164     | 0.009  | -0.01  | -1.185    | 0.256     | 0.441  | 0.113     | 0.059  |
| A017045_01 | -0.111    | 0.118  | -0.024 | 0.114     | 0.036     | 0.043  | -0.084    | 0.006  |
| A017046_01 | -1.122    | -1.224 | -1.131 | -0.446    | -0.368    | -0.337 | -0.33 NA  |        |
| A017048_01 | 0.123     | 0.09   | -0.032 | 0.165     | -0.27     | -0.279 | -0.286    | -0.348 |
| A017049_01 | 0.252     | 0.259  | 0.539  | 0.36      | -0.061    | -0.332 | 0.1       | -0.076 |
| A017051_01 | 0.053     | 0.101  | 0.21   | -0.056    | 0.062     | -0.056 | 0.018     | -0.106 |
| A017053_01 | 0.163     | 0.254  | 0.101  | 0.024     | 0.29      | 0.029  | -0.09     | -0.154 |
| A017056_01 | -0.001 NA |        | -0.12  | -0.871    | 0.021 NA  |        | 0.313     | 0.383  |
| A017057_01 | 0.511     | 0.552  | 0.119  | -0.342    | -0.086 NA |        | 0.085     | 0.214  |
| A017059_01 | -0.663    | -0.526 | -0.143 | -0.248    | -0.142    | -0.226 | -0.186    | -0.005 |
| A017063_01 | 0.159     | 0.401  | -0.059 | 0.439     | 0.105     | -0.001 | -0.263    | -0.254 |
| A017064_01 | -0.477    | -0.344 | -0.262 | -0.329    | -0.183    | -0.242 | -0.412 NA |        |
| A017068_01 | -0.294    | -0.223 | -0.485 | -0.093    | -0.239    | -0.082 | -0.16     | -0.014 |
| A017069_01 | -1.839    | -1.698 | -0.67  | -0.495    | -0.761    | -0.445 | -0.298    | -0.065 |
| A017071_01 | 0.073 NA  |        | -0.069 | -0.368 NA | NA        |        | 0.243     | 0.065  |
| A017072_01 | 0.85      | 0.877  | 0.093  | -0.085    | 0.032     | 0.461  | 0.013     | 0.034  |
| A017073_01 | -1.055    | -0.975 | -0.69  | -0.637    | -0.164    | 0.004  | -0.13     | -0.074 |
| A017075_01 | 0.105     | 0.06   | 0.265  | -0.302    | 0.213     | 0.004  | 0.37      | 0.179  |
| A017079_01 | -0.097    | -0.191 | 0.187  | 0.099     | 0.129     | 0.092  | 0.142     | -0.065 |
| A017080_01 | 0.163     | 0.302  | 0.389  | 0.317     | 0.226     | 0.211  | 0.058     | 0.009  |
| A017083_01 | 0.168     | 0.06   | 0.2    | 0.366     | -0.086    | -0.533 | -0.193    | -0.207 |
| A017087_01 | -0.643    | -0.701 | 0.005  | -0.356    | -0.364    | -0.355 | 0.439     | 0.451  |
| A017088_01 | -0.188    | -0.424 | -0.187 | 0.227     | -0.137    | -0.641 | 0.513     | 0.46   |
| A017091_01 | 0.643     | 0.282  | 0.046  | 0.134     | 0.236     | 0.038  | 0.109     | -0.037 |
| A017092_01 | 0.193     | -0.02  | 0.055  | 0.586     | -0.324    | -0.766 | -0.471    | -0.41  |
| A017095_01 | 0.361 NA  |        | 0.103  | 0.391     | -0.186 NA |        | -0.218    | -0.26  |
| A017096_01 | 0.17      | 0.128  | -0.484 | -0.745    | 0.355     | 0.477  | 0.002     | -0.091 |
| A017098_01 | 0.482     | 0.509  | 0.328  | 0.249     | 0.199     | 0.492  | -0.211    | -0.138 |
| A017099_01 | 0.406     | 0.177  | -0.112 | -0.12     | 0.194     | 0.337  | -0.012    | -0.105 |
| A017100_01 | -0.221    | -0.184 | -0.09  | -0.168    | -0.01     | 0.236  | -0.003    | -0.216 |
| A017108_01 | 0.148     | -0.136 | 0.522  | 0.413     | 0.224 NA  |        | 0.023     | -0.027 |
| A017114_01 | 0.022     | 0.017  | 0.227  | -0.267    | 0.146     | 0.067  | 0.097     | -0.086 |
| A017115_01 | 0.321     | 0.367  | -0.1   | -0.83     | 0.448     | 0.358  | 0.083     | -0.019 |
| A017116_01 | 0.558     | 0.378  | 0.604  | 0.447     | 0.185     | 0.084  | 0.384     | 0.133  |
| A017117_01 | 0.475     | 0.261  | 0.305  | 0.348     | -0.411    | -0.488 | -0.524    | -0.334 |
| A017120_01 | -0.255    | 0.032  | -0.284 | -0.335    | 0.026     | 0.265  | 0.063     | 0.192  |
| A017122_01 | -0.404    | -1.072 | -0.73  | -0.359    | -0.024    | -0.416 | -0.072    | -0.094 |
| A017127_01 | -0.795    | -0.743 | -0.264 | 0.07      | -0.407    | -0.32  | -0.18     | -0.106 |
| A017128_01 | -0.489    | -0.38  | -0.701 | -0.497    | -0.083    | 0.069  | -0.279    | -0.243 |
| A017130_01 | 0.542     | 0.424  | 0.124  | -0.278    | 0.135     | 0.531  | 0.105     | -0.041 |
| A017135_01 | -0.204    | -0.353 | -1.074 | -0.603    | -0.206    | -0.295 | -0.524    | -0.506 |
| A017138_01 | 0.063     | -0.038 | 0.139  | -0.199    | 0.234     | 0.275  | 0.362     | 0.19   |
| A017139_01 | -0.163    | -0.048 | 0.423  | 0.255     | -0.11     | -0.104 | -0.026    | -0.122 |

|            |           |           |           |          |           |           |           |        |
|------------|-----------|-----------|-----------|----------|-----------|-----------|-----------|--------|
| A017140_01 | -0.625    | -0.527    | -0.072    | -0.121   | -0.362    | -0.305    | -0.254    | 0.035  |
| A017142_01 | -0.279    | 0.005     | -0.371    | 0.321    | 0.03      | 0.064     | 0.051     | 0.196  |
| A017149_01 | 0.268     | 0.153     | 0.321     | 0.153    | -0.079    | -0.164    | -0.027    | -0.049 |
| A017151_01 | -0.057 NA |           | -0.175    | -0.076   | -0.098 NA |           | -0.203 NA |        |
| A017153_01 | 0.594     | 0.489     | -0.228    | -0.967   | 0.09 NA   |           | -0.266 NA |        |
| A017160_01 | -0.818    | -0.845    | -0.865    | -1.161   | -0.349    | -0.365    | 0.024     | -0.069 |
| A017162_01 | -0.241    | -0.116    | -0.218    | -0.217   | -0.137    | 0.177     | 0.148     | 0.191  |
| A017173_01 | -0.212    | -0.177    | 0.19      | 0.329    | 0.347 NA  |           | 0.253     | 0.096  |
| A017174_01 | 0.104     | -0.067    | 0.203     | -0.315   | -0.105    | -0.191    | 0.181     | 0.122  |
| A017178_01 | -0.078    | -0.256    | -0.205    | -0.25    | -0.015    | -0.065    | -0.166    | -0.267 |
| A017185_01 | 0.079     | -0.109    | 0.178     | 0.901    | 0.297     | 0.221     | 0.216     | -0.023 |
| A017192_01 | -0.012    | 0.158     | 0.297     | -0.262   | -0.053    | -0.033    | 0.106     | 0.121  |
| A017194_01 | 0.539     | 0.521     | 0.021     | 0.459    | 0.147     | 0.217     | -0.067    | -0.128 |
| A017195_01 | 0.55      | 0.697     | 0.931     | 0.833 NA |           | 0.115     | 0.643     | 0.751  |
| A017207_01 | 0.203     | 0.087     | -0.12     | -0.068   | -0.056    | -0.011    | -0.265    | -0.397 |
| A017227_01 | 0.339     | 0.529     | -0.487    | 0.141    | -0.029    | -0.102    | -0.21     | -0.092 |
| A017229_01 | -0.426    | -0.297    | -0.287    | -0.177   | -0.338    | -0.672    | -0.083    | -0.106 |
| A017235_01 | 0.193     | 0.064     | 0.071     | 0.193    | 0.15      | 0.098     | 0.057     | 0.085  |
| A017240_01 | -0.278    | -0.324    | 0.065     | -0.253   | -0.004    | -0.133    | 0.143     | -0.12  |
| A017247_01 | -0.887 NA | NA        | NA        |          | -0.506    | -0.424 NA | NA        |        |
| A017250_01 | 0.249     | 0.599     | 0.448     | -0.788   | 0.162     | 0.669     | 0.538     | 0.818  |
| A017257_01 | -0.148    | 0.05      | 0.07      | 0.355    | 0.027     | -0.096    | -0.283    | -0.09  |
| A017258_01 | -0.042    | -0.079    | 0.094     | -0.111   | 0.244     | 0.211     | 0.237     | 0.141  |
| A017259_01 | 0.372     | 0.397     | 0.259     | 0.518    | 0.554     | 0.5       | 0.113     | -0.136 |
| A017261_01 | 0.349     | 0.226     | 0.383     | 0.323    | 0.189     | 0.05      | 0.068     | -0.027 |
| A017265_01 | 0.14      | 0.097     | -0.015    | -0.06    | 0.162     | 0.246     | -0.013    | 0.017  |
| A017266_01 | 0.271     | 0.141     | -0.116 NA |          | -0.018    | -0.074    | -0.272 NA |        |
| A017267_01 | -0.009    | -0.177    | 0.418     | -0.171   | 0.152     | 0.061     | 0.12      | 0.008  |
| A017268_01 | 0.07      | 0.031     | 0.066     | -0.173   | 0.115     | 0.088     | 0.767     | 0.435  |
| A017274_01 | -0.018    | 0.029     | 0.196     | 0.209    | -0.091    | 0.002     | 0.061     | 0.088  |
| A017277_01 | 0.022     | -0.109    | -0.045    | -0.297   | 0.151     | 0.16      | 0.284     | 0.208  |
| A017279_01 | -0.5      | -0.53     | -0.411    | -0.025   | -0.036    | -0.019    | 0.695     | 0.395  |
| A017280_01 | -0.025    | 0.007     | 0.094     | -0.129   | 0.134     | 0.084     | 0.206     | 0.099  |
| A017284_01 | 0.541     | 0.352     | 0.721     | 0.785    | 0.501     | 0.899     | -0.035    | 0.02   |
| A017285_01 | -0.077 NA |           | 0.106     | -0.165   | -0.041 NA |           | 0.26      | 0.068  |
| A017289_01 | 0.212     | 0.076     | -0.173    | -0.018   | 0.15      | 0.006     | 0.079     | -0.226 |
| A017293_01 | 0.611     | 0.356     | -0.026    | 0.197    | 0.127     | -0.016    | -0.193    | -0.27  |
| A017305_01 | 0.126     | -0.228    | 0.119     | -0.264   | 0.103     | -0.403    | 0.157     | 0      |
| A017306_01 | -0.12     | -0.139    | -0.518    | -0.152   | 0.123     | -0.111    | -0.17     | -0.195 |
| A017307_01 | 0.476     | 0.468     | 0.024     | -0.465   | 0.137     | 0.144     | 0.087 NA  |        |
| A017308_01 | 0.079 NA  |           | 0         | 0.122 NA | NA        |           | 0.189     | -0.185 |
| A017311_01 | 0.664     | 0.469     | 0.855     | 0.593    | 0.78      | 0.799     | 0.117     | -0.123 |
| A017312_01 | 0.511     | 0.443     | 0.009     | 0.142    | 0.26      | 0.297     | -0.049    | -0.118 |
| A017314_01 | 1.069     | 0.953     | 0.429     | -0.137   | 0.295     | 0.012     | -0.029    | -0.047 |
| A017315_01 | -0.123    | -0.312    | -1.146    | -0.285   | -0.012    | -0.106    | -0.438    | -0.543 |
| A017316_01 | 0.161     | 0.102     | 0.115     | 0.091    | -0.023    | 0.061     | -0.066    | 0.015  |
| A017321_01 | 0.021     | -0.127    | 0.119     | 0.103    | 0.059     | -0.104    | -0.192    | -0.247 |
| A017326_01 | 0.257     | 0.412     | 0.481     | 0.13     | 0.257     | 0.22      | -0.148    | -0.052 |
| A017327_01 | -0.194    | -0.449    | 0.081     | -0.041   | 0.045     | -0.379    | -0.189    | -0.406 |
| A017328_01 | -0.065    | -0.036    | 0.113 NA  |          | 0.271     | -0.054    | 0.086 NA  |        |
| A017331_01 | 0.113     | -0.08     | -0.314    | 0.068    | 0.268     | -0.156    | 0.104     | -0.048 |
| A017335_01 | 0.585     | 0.354     | 0.66      | 1.226    | 0.348     | 0.612     | 0.017     | -0.064 |
| A017340_01 | -0.424    | -0.674    | -0.393 NA |          | 0.006     | -0.18     | -0.324    | -0.21  |
| A017341_01 | 0.52      | 0.559     | 0.084     | 0.127    | 0.095     | 0.164     | 0.11      | 0.119  |
| A017352_01 | -0.187    | -0.231    | -0.121    | -0.169   | 0.071     | -0.056    | 0.012     | -0.022 |
| A017353_01 | 0.373     | 0.02      | 0.018     | 0.068    | 0.102     | 0.005     | -0.158    | -0.29  |
| A017354_01 | 0.289     | 0.283     | 0.029     | -0.118   | 0.375     | 0.363     | 0.381     | 0.179  |
| A017360_01 | -0.594    | -0.464    | -0.595    | -0.774   | -0.076    | 0.107     | -0.253    | -0.149 |
| A017361_01 | -0.589    | -0.752    | -0.673    | 0.055    | -0.605    | -0.942    | -0.29 NA  |        |
| A017363_01 | 0.259     | 0.309     | -0.304    | 0.339    | 0.115     | 0.12      | -0.291    | -0.205 |
| A017365_01 | 0.288     | 0.24      | 0.531     | -0.151   | 0.097     | -0.029    | 0.067 NA  |        |
| A017378_01 | -0.416    | -0.321    | 0.11      | -0.344   | 0.149     | 0.121     | -0.261    | -0.1   |
| A017380_01 | -0.601    | -0.631 NA |           | -0.211   | -0.353    | -0.809    | -0.172 NA |        |
| A017381_01 | -0.178    | -0.312    | -0.269    | 0.049    | -0.113    | -0.065    | -0.389    | -0.267 |
| A017382_01 | 0.049     | -0.185    | -0.18     | 0.181    | 0.118     | -0.002    | 0.074     | 0.006  |
| A017387_01 | 0.166     | -0.015    | 0.158     | -0.389   | 0.285     | 0.368     | 0.103     | 0.014  |
| A017389_01 | 0.203     | 0.027     | 0.214     | -0.25    | 0.135     | 0.077     | 0.014     | 0.107  |
| A017393_01 | -0.372    | -0.359 NA | NA        |          | -0.208    | -0.249    | -0.358    | -0.37  |

|            |           |           |           |        |           |        |           |        |
|------------|-----------|-----------|-----------|--------|-----------|--------|-----------|--------|
| A017394_01 | -1.264    | -0.98     | -0.487    | 0.14   | -0.045    | 0.33   | 0.213     | 0.279  |
| A017396_01 | -0.253    | -0.162    | -0.088    | -0.086 | -0.121    | -0.192 | -0.195    | -0.05  |
| A017405_01 | 0.159     | -0.051    | 0.258     | -0.443 | 0.281     | -0.046 | 0.049     | -0.237 |
| A017413_01 | -0.091    | 0.031     | 0.068     | -0.246 | -0.07     | -0.101 | 0.053 NA  |        |
| A017419_01 | 0.505     | 0.085     | -0.542    | -0.714 | -0.066    | 0.115  | -0.039    | -0.181 |
| A017421_01 | -0.08 NA  |           | 0.079     | -0.217 | 0.252 NA  |        | 0.109     | 0.044  |
| A017423_01 | 0.438     | 0.244     | 0.091     | 0.338  | 0.259     | 0.028  | 0.28      | -0.004 |
| A017425_01 | -0.332 NA | NA        | NA        |        | 0.09      | -0.358 | 0.03 NA   |        |
| A017431_01 | -0.084    | -0.171    | -0.41     | -0.403 | 0.134     | -0.119 | -0.055    | -0.336 |
| A017433_01 | 0.327     | 0.138     | -0.228    | 0.082  | 0.073     | 0.144  | -0.171    | -0.035 |
| A017434_01 | -0.402    | -0.185    | -0.252    | -0.474 | -0.075    | 0.111  | 0.134     | 0.178  |
| A017443_01 | -0.194    | -0.412    | -0.191    | 0.143  | -0.102    | -0.344 | 0.01 NA   |        |
| A017451_01 | -0.36 NA  |           | -0.529    | -1.129 | 0.05 NA   |        | -0.375    | -0.529 |
| A017452_01 | -1.494    | -1.546    | -0.844    | -0.371 | -1.136    | -1.421 | -1.097    | -0.826 |
| A017460_01 | -2.008 NA | NA        | NA        |        | -1.759 NA |        | -0.52     | -0.46  |
| A017466_01 | 0.095     | -0.109    | 0.403     | 0.372  | 0.112     | -0.228 | 0.062     | 0.087  |
| A017468_01 | 0.166     | 0.577     | 0.368     | 0.105  | 0.076     | 0.28   | 0.457     | 0.666  |
| A017471_01 | -0.124    | -0.197    | -0.278    | 0.158  | 0.072     | -0.045 | -0.007    | -0.228 |
| A017476_01 | -0.299    | -0.185 NA | NA        |        | 0.012     | -0.304 | -0.041 NA |        |
| A017477_01 | -1.042    | -1.146    | -0.363 NA |        | -0.23     | -0.022 | -0.023    | 0.292  |
| A017486_01 | 0.456     | 0.274     | -0.137    | -0.266 | 0.131     | 0.172  | 0.03      | -0.049 |
| A017501_01 | 0.264     | 0.272     | 0.712     | 0.515  | 0.153     | 0.054  | 0.078     | -0.001 |
| A017502_01 | -0.421    | -0.23     | 0.037     | 0.073  | -0.096    | -0.282 | -0.014    | -0.34  |
| A017508_01 | -0.324    | -0.322    | -0.144    | 0.126  | -0.021    | -0.124 | -0.075 NA |        |
| A017513_01 | -1.731    | -2.068    | -1.476    | -1.274 | -1.563    | -2.001 | -2.585    | -1.949 |
| A017517_01 | 0.385     | 0.383     | 0.143     | -0.051 | 0.196     | 0.191  | 0.05      | -0.071 |
| A017534_01 | -0.002    | 0.077     | -1.135    | -0.51  | 0.086     | 0.168  | 0.228     | 0.115  |
| A017549_01 | 0.406     | 0.248     | 0.161     | 0.137  | 0.094     | 0.004  | -0.069    | -0.135 |
| A017558_01 | 0.681     | 0.366     | 0.025     | -0.32  | 0.315     | 0.317  | -0.142    | -0.032 |
| A017559_01 | -0.119    | -0.453    | 0.246     | 0.182  | -0.095    | -0.271 | -0.111    | -0.183 |
| A017562_01 | -0.293    | -0.295    | -0.27     | -0.199 | -0.01     | -0.113 | -0.077    | -0.181 |
| A017563_01 | -0.015    | 0.075     | -0.062    | 0.12   | 0.001     | 0.165  | -0.025    | -0.014 |
| A017564_01 | -0.912    | -1.253    | -1.209    | -1.17  | -0.196    | -0.483 | -0.287    | -0.419 |
| A017569_01 | -0.006    | -0.067    | 0.399     | 0.382  | 0.153     | 0.043  | 0.175     | -0.013 |
| A017570_01 | 0.032     | 0.253     | 0.094     | -0.354 | 0.154     | 0.09   | 0.089     | -0.039 |
| A017575_01 | -0.201    | 0.096     | 0.347     | 0.061  | 0.164     | 0.472  | 0.35 NA   |        |
| A017580_01 | 0.054     | 0.22      | 0.064     | 0.124  | -0.017    | 0.111  | 0.045 NA  |        |
| A017581_01 | -0.369    | -0.39     | -0.302    | 0      | -0.13     | -0.157 | -0.064    | -0.086 |
| A017583_01 | -0.116    | 0.077     | -0.333    | -0.253 | -0.174    | -0.085 | -0.236    | -0.173 |
| A017587_01 | 0.098     | 0.252     | 0.118     | -0.164 | -0.168 NA |        | -0.042    | -0.256 |
| A017589_01 | 0.373     | 0.428     | -0.466    | -0.067 | 0.169     | 0.25   | -0.069    | -0.048 |
| A017593_01 | 0.714     | 0.757     | 0.832     | 0.129  | 0.284     | 0.364  | 0.184     | 0.106  |
| A017595_01 | 0.165     | 0.219     | 0.218     | 0.253  | 0.141     | 0.254  | -0.145    | -0.374 |
| A017597_01 | 0.619     | 0.431     | 0.311     | -0.006 | 0.436     | 0.605  | 0.253     | -0.054 |
| A017600_01 | -0.073    | 0.157     | -0.177    | 0.576  | 0.022     | 0.049  | -0.015    | -0.125 |
| A017604_01 | -0.202    | -0.276    | -0.198    | 0.005  | 0.082     | 0.068  | -0.132 NA |        |
| A017612_01 | 1.232     | 1.355     | 0.589     | 0.815  | 0.456     | 0.421  | 0.436     | 0.344  |
| A017614_01 | -0.057    | -0.254    | 0.223     | -0.406 | 0.374     | 0.268  | 0.16      | -0.056 |
| A017618_01 | 0.066     | 0.102     | -0.006    | 0.173  | -0.221    | -0.177 | 0.005     | -0.071 |
| A017633_01 | -0.124    | 0.026     | -0.127    | 0.197  | 0.007     | 0.229  | -0.026    | 0.309  |
| A017635_01 | 0.625     | 0.384     | -0.066    | -0.62  | 0.387 NA  |        | 0.062     | -0.001 |
| A017636_01 | 0.122     | -0.029    | -0.121    | -0.242 | 0.189     | 0.309  | 0.116     | 0.085  |
| A017637_01 | 0.223     | 0.254 NA  |           | -0.164 | 0.15      | 0.348  | 0.142     | -0.01  |
| A017640_01 | -0.174    | -0.526    | 0.167     | 0.102  | -0.078    | -0.176 | 0.188     | 0.029  |
| A017641_01 | 0.647     | 0.564     | -0.047    | -0.059 | 0.28      | 0.377  | -0.123    | -0.136 |
| A017644_01 | 0.271     | 0.062     | 0.172     | 0.107  | 0.04      | -0.153 | -0.048    | -0.127 |
| A017646_01 | -0.936    | -1.082    | -0.395    | 0.048  | -0.062    | -0.309 | 0.049     | -0.077 |
| A017652_01 | -0.213    | -0.377    | -0.523    | -0.856 | -0.143    | -0.13  | -0.14     | -0.276 |
| A017653_01 | -0.498    | -1.126 NA |           | -0.323 | -0.16 NA  |        | 0.034     | -0.023 |
| A017656_01 | 0.02      | 0.096     | 0.471     | 0.464  | 0.143     | 0.129  | -0.399    | -0.293 |
| A017657_01 | -0.271    | 0.037     | 0.213     | 0.182  | -0.145    | -0.207 | -0.071    | 0.304  |
| A017659_01 | 0.034     | 0.059     | 0.221     | 0.273  | 0.198     | 0.013  | -0.146    | -0.252 |
| A017664_01 | 0.463     | 0.194     | 0.488     | -0.398 | 0.147     | 0.29   | 0.089     | -0.068 |
| A017667_01 | -0.062    | -0.198    | 0.243     | 0.455  | -0.531    | -0.904 | -0.346    | -0.486 |
| A017668_01 | 0.3       | 0.233     | -0.225    | 0.232  | 0.013     | -0.042 | -0.087    | -0.114 |
| A017671_01 | -0.097    | -0.126    | -0.453    | 0.117  | -0.057    | -0.25  | -0.108    | -0.176 |
| A017672_01 | -0.514    | -0.188    | 0.233     | -0.125 | -0.294    | -0.171 | -0.092    | 0.295  |
| A017692_01 | 0.678     | 0.672     | 0.674     | -0.188 | 0.353     | 0.357  | 0.398     | 0.186  |

|            |           |           |        |        |           |           |           |        |
|------------|-----------|-----------|--------|--------|-----------|-----------|-----------|--------|
| A017693_01 | -0.181    | 0.094     | 0.224  | 0.076  | -0.014    | 0.019     | -0.187    | -0.067 |
| A017695_01 | -2.152    | -2.76     | -0.967 | -1.419 | -0.422    | -0.649    | 0.084     | -0.035 |
| A017699_01 | -0.049    | -0.244    | 0.096  | -0.207 | -0.038    | -0.323    | 0.169     | -0.112 |
| A017701_01 | 0.163     | -0.028    | -0.548 | 0.095  | -0.216    | -0.221    | -0.492    | -0.311 |
| A017703_01 | 0.253     | 0.122     | 0.214  | -0.181 | 0.132     | -0.091    | -0.036    | -0.106 |
| A017713_01 | -0.03     | -0.162    | -0.144 | 0.023  | -0.011    | -0.19     | -0.019    | -0.058 |
| A017714_01 | 0.8       | 0.58      | 0.763  | 0.959  | -1.368    | -1.906    | -1.444    | -1.244 |
| A017715_01 | -0.602    | 0.024     | -0.182 | 0.5    | -0.065    | 0.16      | 0.063     | 0.163  |
| A017716_01 | -0.21     | -0.315    | 0.08   | 0.193  | -0.07     | -0.285    | -0.104    | -0.135 |
| A017718_01 | 0.292     | 0.431     | -0.12  | -0.061 | -0.18     | 0.103     | -0.086    | 0.015  |
| A017726_01 | 0.485     | 0.435     | -0.088 | 0.069  | 0.09 NA   |           | 0.026     | -0.172 |
| A017734_01 | -0.251    | -0.111    | -0.189 | 0.099  | -0.061    | -0.022    | -0.005    | -0.005 |
| A017737_01 | -2.967 NA | NA        | NA     | NA     | -1.237    | -2.024 NA | NA        |        |
| A017740_01 | -0.139    | -0.394 NA | NA     | NA     | -0.041    | -0.273    | -0.366 NA |        |
| A017742_01 | 0.154     | -0.133    | 0.147  | -0.192 | -0.263    | -0.312    | -0.145    | -0.33  |
| A017743_01 | 0.227     | 0.03      | 0.144  | 0.201  | -0.108 NA |           | -0.142    | -0.383 |
| A017746_01 | 0.441     | 0.378     | -0.04  | 0.535  | 0.275     | 0.003     | 0.327 NA  |        |
| A017749_01 | 0.06      | -0.127    | 0.111  | 0.111  | 0.255     | 0.063     | 0.249     | -0.181 |
| A017754_01 | 0.038     | -0.391 NA |        | 0.276  | 0.023 NA  |           | 0.139     | -0.097 |
| A017756_01 | -0.161    | -0.062    | 0.25   | -0.038 | -0.174    | -0.142    | -0.094    | -0.084 |
| A017757_01 | -0.321    | -0.194    | -0.128 | 0.023  | 0.083     | -0.19     | 0.094     | -0.203 |
| A017758_01 | 0.015     | 0.019     | 0.257  | 0.475  | 0.089     | 0.33      | 0.384     | 0.449  |
| A017762_01 | 0.296     | 0.498     | 0.47   | -0.727 | 0.398     | 0.489     | 0.141     | 0.241  |
| A017764_01 | -0.15     | -0.281    | 0.078  | 0.309  | -0.028    | -0.435    | -0.078    | -0.076 |
| A017767_01 | 0.652     | 0.42      | 1.161  | 0.942  | 0.761     | 0.79      | 0.227     | 0.152  |
| A017768_01 | 0.061     | 0.07      | -0.076 | -0.117 | -0.24     | -0.045    | 0.001     | 0.058  |
| A017769_01 | 0.011     | 0.045     | 0.273  | -0.293 | 0.141     | 0.136     | 0.051 NA  |        |
| A017771_01 | -0.043    | 0.173     | 0.316  | 0.028  | 0.081     | -0.035    | 0.055     | 0.006  |
| A017777_01 | 0.021     | -0.065    | 0.045  | 0.317  | 0.249     | 0.092     | 0.095     | -0.061 |
| A017779_01 | 0.079     | 0.078     | 0.225  | -0.369 | 0.05      | -0.143    | 0.103     | 0.026  |
| A017782_01 | 0.274     | 0.399     | 0.439  | -0.289 | 0.157     | -0.007    | 0.442     | 0.276  |
| A017783_01 | 0.087     | -0.007    | -0.04  | 0.203  | -0.646    | -0.841    | 0.323     | 0.161  |
| A017794_01 | 0.675     | 0.718     | 0.69   | -0.163 | 0.15 NA   |           | 0.592     | 0.376  |
| A017798_01 | 0.348     | 0.339     | 0.427  | 0.128  | 0.293     | -0.144    | 0.152     | 0.016  |
| A017799_01 | 0.153     | 0.194     | 0.105  | -0.424 | 0.302     | 0.249     | 0.172     | -0.063 |
| A017801_01 | -0.033    | -0.114    | 0.259  | 0.318  | 0.106     | -0.199    | -0.164    | -0.153 |
| A017803_01 | 0.496     | 0.601     | 0.222  | -0.561 | 0.194     | 0.346     | 0.142     | 0.114  |
| A017807_01 | -0.148    | -0.096    | 0.335  | 0.193  | -0.029    | -0.374    | 0.038     | 0.029  |
| A017808_01 | 0.381     | 0.312     | 0.141  | 0.19   | -0.066    | -0.217    | -0.053    | -0.149 |
| A017812_01 | -0.208 NA |           | 0.445  | -0.041 | -0.095    | -0.206    | 0.304 NA  |        |
| A017813_01 | -0.836    | -0.899    | -0.195 | -0.254 | -0.777    | -1.025    | -0.132    | -0.132 |
| A017815_01 | 1.236     | 1.113     | 1.701  | 1.861  | 0.459     | 0.584     | -1.263    | -1.011 |
| A017824_01 | -0.71     | 0.178     | 0.282  | -0.247 | -0.379    | 0.14      | -0.165    | 0.487  |
| A017825_01 | 0.251     | 0.385     | 0.435  | 0.272  | 0.189     | 0.179     | -0.19     | 0.095  |
| A017835_01 | -0.283    | -0.248    | -0.278 | 0.24   | 0.026     | -0.088    | -0.25     | -0.231 |
| A017837_01 | -0.071    | -0.028    | 0.336  | -0.043 | -0.634    | -0.287    | 0.187     | 0.292  |
| A017839_01 | 0.276     | 0.239     | 0.274  | 0.2    | -0.06     | -0.041    | -0.057    | -0.028 |
| A017845_01 | 0.285     | 0.251     | 0.25   | 0.118  | 0.086     | 0.2       | 0.179     | 0.136  |
| A017848_01 | 0.68      | 0.205     | 0.22   | -0.227 | 0.17      | 0.26      | 0.116     | -0.039 |
| A017849_01 | -0.236    | -0.569    | -0.127 | 0.222  | 0.122     | 0.02      | -0.016    | -0.017 |
| A017850_01 | 0.773     | 0.705     | 0.545  | 0.418  | 0.215     | 0.369     | 0.038 NA  |        |
| A017852_01 | 0.556     | 0.421     | 0.119  | -0.048 | 0.28      | 0.328     | 0.096     | 0.106  |
| A017855_01 | 0.439     | 0.021     | -0.198 | -0.781 | 0.176     | 0.151     | 0.199     | -0.043 |
| A017856_01 | -0.543    | -0.524    | -0.227 | -0.205 | -0.564    | -0.402    | -0.301    | 0.019  |
| A017858_01 | -0.471    | -0.418    | -0.007 | -0.474 | 0.249     | 0.063     | 0.022     | -0.129 |
| A017859_01 | -0.597    | -1.331    | -0.336 | -0.059 | -0.39     | -0.814    | 0.117     | 0.18   |
| A017860_01 | -0.477    | -0.083 NA | NA     | NA     | -0.769    | -0.816    | -0.928    | -0.841 |
| A017861_01 | -0.635    | -0.468    | -0.373 | 0.06   | 0.016     | -0.1      | -0.016    | -0.075 |
| A017863_01 | 0.023     | 0.191     | 0.218  | 0.009  | 0.094     | -0.089    | -0.036    | 0.042  |
| A017866_01 | -0.317    | -0.307 NA | NA     | NA     | 0.168     | -0.203    | 0.033 NA  |        |
| A017867_01 | -0.769    | -0.532    | -0.185 | -0.316 | 0.058     | 0.034     | -0.087    | -0.029 |
| A017868_01 | -0.006    | -0.165    | -0.408 | -0.455 | 0.348     | 0.337     | 0.021     | -0.179 |
| A017869_01 | -0.284    | -0.446    | 0.073  | 0.237  | 0.051     | -0.17     | -0.142    | -0.185 |
| A017871_01 | 0.308     | 0.17 NA   |        | 0.326  | 0.554 NA  | NA        | NA        |        |
| A017872_01 | -0.454    | -0.292    | 0.15   | -0.356 | -0.081    | 0.002     | -0.159    | 0.045  |
| A017873_01 | 0.051     | 0.082     | -0.118 | 0.346  | 0.036     | -0.122    | -0.218    | -0.052 |
| A017874_01 | -0.35     | -0.299    | -0.133 | -0.377 | 0.001     | 0.021     | -0.086    | -0.115 |
| A017877_01 | -0.349    | -0.063    | -0.176 | -0.144 | 0.01      | 0.234     | -0.1      | 0.069  |

|            |           |           |        |        |           |        |           |        |
|------------|-----------|-----------|--------|--------|-----------|--------|-----------|--------|
| A017878_01 | 0.021     | -0.236    | -0.007 | -0.359 | 0.207     | 0.077  | -0.304    | -0.278 |
| A017880_01 | -0.102    | -0.403    | 0.272  | 0.187  | 0.133     | -0.123 | 0.262     | -0.004 |
| A017882_01 | -0.562    | -0.532    | 0.049  | -0.106 | -0.387    | -0.253 | -0.317    | -0.091 |
| A017885_01 | -0.591    | -0.863    | -0.286 | 0.07   | -0.452 NA |        | -0.415 NA |        |
| A017886_01 | -0.037    | -0.043    | 0.229  | 0.363  | 0.075     | -0.086 | -0.034    | 0.076  |
| A017887_01 | -0.584    | -0.282 NA |        | -0.117 | 0.001 NA  |        | -0.003    | -0.071 |
| A017890_01 | 0.271     | 0.603     | 0.069  | -0.503 | 0.159     | 0.437  | -0.034    | -0.047 |
| A017892_01 | 0.16      | 0.154     | 0.296  | -0.24  | 0.075     | 0.029  | 0.04      | 0.042  |
| A017894_01 | 0.107     | 0.026     | -0.265 | 0.269  | -0.127    | -0.267 | -0.282    | -0.325 |
| A017897_01 | 0.008     | -0.206    | -0.524 | 0.106  | -0.222    | -0.449 | -0.32     | -0.22  |
| A017899_01 | 0.423     | 0.305     | 0.218  | 0.233  | 0.171     | 0.24   | 0.064     | 0.058  |
| A017900_01 | 0.153 NA  |           | -0.11  | -0.149 | 0.036 NA  |        | 0.487     | 0.33   |
| A017901_01 | -0.021    | -0.064    | -0.184 | -0.279 | 0.154     | -0.021 | -0.072 NA |        |
| A017902_01 | -0.335    | -0.254    | -0.038 | -0.202 | 0.015     | 0.117  | 0.364     | 0.413  |
| A017904_01 | -0.769    | -0.999    | -0.333 | 0.004  | -1.384    | -1.938 | -0.205    | -0.273 |
| A017909_01 | -0.375    | -0.353    | -0.109 | 0.23   | -0.196    | -0.281 | -0.259    | -0.257 |
| A017913_01 | 0.235     | 0.035     | -0.285 | -1.151 | 0.755     | 0.87   | -0.196    | -0.275 |
| A017915_01 | -0.28     | -0.351    | -0.074 | 0.182  | -0.345    | -0.415 | 0.098     | 0.23   |
| A017916_01 | -0.314 NA |           | -0.014 | 0.086  | 0.056 NA  |        | 0.195     | -0.049 |
| A017918_01 | 0.922     | 0.775     | 0.359  | -0.18  | 0.082 NA  |        | 0.23      | 0.162  |
| A017920_01 | -0.245    | -0.453    | 0.324  | -0.024 | 0.103     | 0.042  | 0.223     | 0.067  |
| A017922_01 | -0.052    | -0.041    | -0.093 | -0.502 | 0.26      | 0.241  | 0.159     | 0.006  |
| A017923_01 | -0.159    | -0.376    | -0.146 | -0.313 | -0.235    | -0.233 | -0.134    | -0.066 |
| A017924_01 | 0.744     | 0.854     | 0.164  | -0.261 | 0.656     | 0.659  | -0.203    | -0.491 |
| A017925_01 | -0.552    | -0.552    | -0.467 | -0.651 | -0.119    | -0.257 | -0.313    | -0.395 |
| A017928_01 | 0.303     | 0.107     | 0.228  | -0.057 | 0.147     | -0.102 | -0.053    | -0.085 |
| A017933_01 | -0.085    | -0.071    | -0.454 | -0.182 | -0.153    | -0.252 | -0.447    | -0.44  |
| A017934_01 | 0.294     | 0.142     | -0.076 | -0.187 | 0.316     | 0.431  | 0.122     | -0.161 |
| A017935_01 | -0.066    | -0.044    | -0.087 | -0.653 | 0.28      | 0.393  | -0.025    | -0.208 |
| A017936_01 | -0.237    | -0.17     | 0.121  | 0.019  | 0.01      | 0.044  | -0.736    | -0.572 |
| A017937_01 | 0.081     | 0.037     | 0.115  | -0.356 | 0.06      | -0.067 | 0.05 NA   |        |
| A017938_01 | -0.136    | -0.144    | -0.022 | 0.198  | 0.277     | 0.25   | 0.63      | 0.472  |
| A017942_01 | -1.215    | -1.632    | -1.259 | -0.501 | -1.213    | -2.003 | -1.934    | -1.388 |
| A017945_01 | 0.314     | 0.274     | 0.083  | 0.106  | 0.103     | 0.34   | -0.009    | -0.058 |
| A017949_01 | 0.258     | 0.208     | 0.171  | -0.584 | 0.222     | 0.1    | 0.174 NA  |        |
| A017950_01 | -0.181    | -0.274    | -0.224 | 0.054  | -0.207    | -0.281 | -0.012    | 0.111  |
| A017951_01 | -0.206    | -0.262    | 0.153  | 0.014  | 0.033     | -0.158 | 0.316     | 0.217  |
| A017952_01 | -0.14     | 0.071     | -0.023 | -0.159 | -0.051    | 0.043  | 0.079     | 0.142  |
| A017955_01 | -0.556    | -0.469    | -0.288 | -0.526 | -0.129    | -0.079 | 0.231     | 0.21   |
| A017957_01 | 0.007     | -0.052    | -0.23  | 0.355  | 0.287     | -0.031 | -0.04     | -0.114 |
| A017962_01 | -0.341    | -0.089    | 0.344  | -0.035 | -0.034    | 0.069  | 0.295     | 0.4    |
| A017965_01 | 0.3       | 0.252     | 0.265  | -0.478 | 0.343     | 0.351  | 0.036     | -0.103 |
| A017967_01 | -0.27     | -0.167    | -0.32  | 0.293  | -0.112    | 0.16   | -0.531    | -0.14  |
| A017971_01 | -0.295    | -0.268    | -0.262 | 0.045  | -0.364    | -0.259 | -0.352    | -0.015 |
| A017972_01 | 0.328     | 0.408     | 0.329  | 0.404  | -0.053    | -0.048 | -0.002 NA |        |
| A017974_01 | -0.226    | -0.2      | -1.511 | -0.84  | -0.22     | -0.152 | -0.703    | -0.373 |
| A017975_01 | 0.328     | 0.368     | 0.071  | -0.378 | 0.142     | 0.337  | 0.144     | 0.242  |
| A017977_01 | -0.19     | -0.171    | -0.43  | -0.106 | 0.134     | 0.064  | -0.243    | -0.206 |
| A017979_01 | -0.572    | -0.734    | -0.146 | -0.745 | -0.337    | -0.19  | -0.32     | 0.16   |
| A017980_01 | -0.647    | -0.684    | -0.167 | -0.357 | -0.131    | -0.05  | -0.021    | 0.068  |
| A017982_01 | -0.24     | -0.412    | -0.193 | -0.513 | 0.015     | -0.14  | -0.097    | -0.096 |
| A017983_01 | -1.191    | -1.495    | -0.241 | -0.62  | -0.313    | -0.681 | -0.078 NA |        |
| A017985_01 | 0.587     | 0.828     | 0.316  | -0.13  | 0.092     | 0.442  | -0.087    | -0.066 |
| A017987_01 | -0.05     | -0.184    | -0.194 | -0.03  | 0.059     | -0.044 | -0.023    | -0.117 |
| A017991_01 | 0.06      | 0.025     | 0.211  | 0.033  | -0.122    | 0.052  | -0.129    | -0.133 |
| A017993_01 | -0.225    | -0.365    | -0.426 | -0.141 | -0.142    | -0.054 | -0.084    | -0.036 |
| A017994_01 | 0.11      | -0.184    | -0.059 | 0.054  | 0.156     | -0.002 | -0.145    | -0.193 |
| A017995_01 | -1.419    | -1.724    | -2.293 | -2.362 | -1.079    | -1.599 | -0.506    | -0.449 |
| A017996_01 | 0.082     | 0.077     | 0.039  | -0.219 | 0.107     | 0.038  | -0.04     | -0.123 |
| A018000_01 | -0.132    | -0.12     | -0.064 | -0.114 | 0.046     | -0.038 | -0.192    | 0.003  |
| A018004_01 | -0.155    | -0.201    | -0.332 | -0.196 | -0.066    | -0.149 | 0.019     | -0.036 |
| A018006_01 | -1.784    | -2.184    | 0.29   | 0.247  | -1.75     | -2.297 | 0.208     | 0.212  |
| A018011_01 | 0.594     | 0.313     | 0.26   | 0.057  | -0.116    | 0.222  | 0.146     | 0.082  |
| A018016_01 | 0.189     | 0.152     | 0.053  | -0.196 | 0.06      | 0.313  | 0.039     | 0.016  |
| A018017_01 | 0.755     | 0.632     | 0.425  | 0.244  | 0.173     | 0.191  | -0.008    | -0.026 |
| A018019_01 | 1.339     | 1.38      | 0.609  | 0.884  | 0.462     | 1.088  | 0.479     | 0.677  |
| A018022_01 | 0.558     | 0.426     | 0.432  | -0.443 | -0.084    | -0.022 | -0.117    | 0.005  |
| A018025_01 | -0.175    | -0.36     | -0.139 | -0.172 | 0.042     | -0.137 | 0.165     | 0.082  |

|            |        |           |           |           |          |        |           |        |
|------------|--------|-----------|-----------|-----------|----------|--------|-----------|--------|
| A018028_01 | 0.424  | 0.47      | -0.048    | 0.015     | -0.146   | 0.077  | -0.307    | -0.186 |
| A018029_01 | 0.14   | 0.209     | 0.032     | 0.159     | 0.202    | 0.265  | 0.017     | -0.211 |
| A018032_01 | -0.936 | -1.296    | -1.787    | -2.23     | -1.9 NA  |        | -2.023 NA |        |
| A018034_01 | -0.747 | -0.715 NA |           | NA        | -0.055   | 0.161  | -0.206    | -0.227 |
| A018038_01 | 0.399  | 0.24      | -0.405    | -0.04     | 0.058    | 0.446  | 0.076     | 0.018  |
| A018041_01 | 1.163  | 1.002     | 0.343     | 0.562     | 0.202    | 0.759  | 0.178     | 0.213  |
| A018042_01 | 0.174  | 0.17      | 0.234     | 0.112     | -0.135   | -0.026 | 0.184     | 0.071  |
| A018043_01 | 0.107  | 0.085     | -0.057    | -0.152    | 0.075    | 0.132  | -0.136    | -0.133 |
| A018046_01 | 0.631  | 0.45      | 0.052     | -0.748    | 0.266    | 0.574  | 0.284     | 0.316  |
| A018047_01 | 0.426  | 0.346     | -0.139    | -0.229    | -0.082   | 0.054  | -0.16     | -0.074 |
| A018048_01 | 0.054  | 0.192     | 0.072     | -0.078    | 0.151    | 0.337  | -0.034    | -0.112 |
| A018049_01 | -0.435 | -0.511    | -0.261    | -0.56     | -0.264   | -0.634 | -0.061    | -0.056 |
| A018052_01 | -0.073 | -0.199    | -0.455    | -0.649    | -0.042   | -0.001 | -0.068    | -0.048 |
| A018054_01 | -0.446 | -0.495    | -0.437    | -0.298    | -0.259   | -0.252 | 0.058 NA  |        |
| A018058_01 | 0.042  | 0         | 0.206     | 0.493     | 0.541    | 0.729  | 0.236     | 0.132  |
| A018060_01 | 0.222  | -0.115    | -0.403    | 0.171     | -0.199   | -0.156 | -0.058    | -0.111 |
| A018062_01 | 0.322  | 0.212     | -0.1      | -0.144    | 0.327    | 0.414  | 0.379     | 0.222  |
| A018064_01 | -0.605 | -0.534    | -0.398    | -1.08     | -0.229   | -0.112 | -0.29     | -0.094 |
| A018065_01 | 0.498  | 0.243     | 0.27      | 0.651     | 0.381    | 0.59   | 0.282     | 0.176  |
| A018066_01 | -0.337 | -0.315    | -0.389    | -0.866    | 0.264    | 0.564  | -0.319    | -0.119 |
| A018067_01 | -0.103 | -0.309    | -0.08     | -0.203    | -0.207   | -0.274 | 0.156     | 0.014  |
| A018068_01 | -0.243 | -0.099    | 0.184     | -0.374    | 0.135    | 0.178  | -0.077    | 0.105  |
| A018069_01 | 0.372  | 0.242     | -0.342    | 0.213     | -0.154   | -0.117 | -0.29     | -0.219 |
| A018070_01 | 0.462  | 0.164     | -0.054    | -0.243    | 0.066    | 0.403  | 0.077     | -0.066 |
| A018071_01 | 0.195  | -0.095    | 0.126     | 0.418 NA  |          | NA     | -0.05     | -0.107 |
| A018072_01 | -0.289 | -0.231    | 0.022     | 0.202     | -0.167   | -0.155 | -0.154    | 0.018  |
| A018074_01 | -0.013 | -0.22     | -0.057    | -0.047    | 0.039    | -0.095 | -0.057    | -0.08  |
| A018076_01 | 0.79   | 0.599     | -0.358    | -0.241    | 0.284    | 0.172  | -0.171    | -0.106 |
| A018080_01 | 0.239  | 0.538     | 0.164     | 0.348     | 0.241    | 0.307  | -0.123    | 0.001  |
| A018081_01 | 0.32   | 0.495     | 0.152     | -0.186    | 0.19     | 0.318  | 0.294     | 0.139  |
| A018085_01 | -0.378 | -0.083    | -0.006    | 0.145     | 0.089    | 0.159  | -0.034 NA |        |
| A018088_01 | 0.586  | 0.445     | -0.062    | 0.167     | -0.026   | 0.366  | 0.087     | 0.145  |
| A018089_01 | -0.194 | -0.259    | -0.385    | -0.49     | 0.149    | 0.264  | 0.1       | 0.109  |
| A018092_01 | 0.018  | 0.154     | 0.281     | -0.273    | -0.154   | 0.055  | -0.098    | 0.115  |
| A018093_01 | 0.074  | -0.184    | -0.247    | -0.254 NA |          | 0.116  | 0.098     | -0.033 |
| A018097_01 | 0.541  | 0.229     | 0.182     | 0.077     | 0.394    | 0.117  | 0.67 NA   |        |
| A018098_01 | -0.234 | -0.347    | -0.303    | -1.406    | -0.022   | -0.052 | -0.218    | -0.206 |
| A018099_01 | -0.175 | -0.321    | 0.14      | -0.123    | 0.191    | 0.036  | 0.022     | 0.035  |
| A018100_01 | 0.466  | 0.411     | 0.925     | 1.263     | 0.275    | 0.073  | 0.774     | 0.512  |
| A018101_01 | -0.311 | -0.457    | -0.562    | -0.28     | 0.201    | 0.053  | -0.117    | -0.13  |
| A018102_01 | 0.428  | 0.463     | 0.398     | 0.028     | 0.122    | 0.2    | 0.257     | 0.241  |
| A018103_01 | -0.28  | -0.094    | -0.118    | -0.146    | 0.063    | 0.155  | -0.388    | -0.306 |
| A018104_01 | -0.218 | -0.295    | -0.233    | -0.04     | 0.144    | -0.018 | -0.029    | 0.012  |
| A018105_01 | 0.025  | -0.11     | -0.674    | 0.112     | -0.368   | -0.164 | -0.448    | -0.368 |
| A018106_01 | 0.579  | 0.321     | 0.595     | -0.159    | 0.295    | 0.313  | 0.653     | 0.323  |
| A018107_01 | -0.643 | -0.639    | -0.355    | -0.086    | -0.247   | -0.327 | -0.142    | -0.129 |
| A018108_01 | 0.501  | 0.33      | -0.049 NA |           | 0.284    | 0.304  | 0.104 NA  |        |
| A018110_01 | 0.246  | -0.019    | -0.071    | -0.076    | 0.134    | 0.164  | 0.004     | -0.139 |
| A018111_01 | -0.143 | -0.148    | 0.054     | -0.682    | 0.024    | -0.088 | 0.071     | -0.018 |
| A018115_01 | -0.153 | -0.263    | -0.201    | -0.35     | -0.086   | 0.119  | -0.161    | -0.236 |
| A018117_01 | -0.201 | -0.125    | 0.015     | 0.029     | -0.206   | -0.392 | -0.179    | -0.096 |
| A018119_01 | 0.849  | 0.792     | 0.553     | 0.434     | 0.129    | 0.248  | 0.417     | 0.248  |
| A018126_01 | -0.125 | -0.163    | -0.02     | 0.208     | -0.185   | -0.424 | -0.092 NA |        |
| A018128_01 | 0.143  | 0.298     | 0.4       | 0.084     | 0.309    | 0.181  | 0.224     | 0.038  |
| A018135_01 | -0.009 | -0.201    | 0.21      | 0.386     | 0.223    | -0.045 | -0.07     | -0.194 |
| A018139_01 | -0.393 | -0.582    | -0.06     | -0.62     | -0.091   | -0.2   | -0.109    | -0.055 |
| A018147_01 | 0.022  | 0.092     | -0.131    | 0.269     | 0.297    | 0.298  | 0.244     | 0.236  |
| A018151_01 | -0.134 | 0.052     | 0.358     | 0.452     | 0.297    | 0.056  | -0.013    | 0.036  |
| A018153_01 | 0.315  | 0.09      | -0.014    | -0.285    | 0.104    | 0.493  | -0.059    | 0.044  |
| A018154_01 | -0.876 | -0.767    | -0.356    | -0.312    | -0.259   | -0.239 | -0.114    | 0.004  |
| A018155_01 | 0.262  | 0.253     | 0.052     | 0.379     | 0.035 NA |        | 0.07      | 0.024  |
| A018156_01 | -0.161 | -0.445    | -0.334    | -0.756    | 0.164    | 0.04   | -0.072    | -0.153 |
| A018157_01 | 0.315  | 0.538     | 0.544     | 0.824     | 0.032    | 0.382  | 0.307     | 0.391  |
| A018159_01 | -0.311 | -0.304    | 0.269     | -0.375    | 0.279    | 0.528  | 0.265     | 0.139  |
| A018163_01 | -1.617 | -1.873 NA |           | -1.43     | -1.191   | -1.955 | -0.546    | -0.481 |
| A018171_01 | -0.248 | -0.342    | -0.163    | -0.145    | 0        | -0.176 | -0.189    | -0.235 |
| A018174_01 | 0.105  | 0.167     | -0.026    | -0.093    | 0        | -0.048 | 0.072     | -0.117 |
| A018175_01 | -0.076 | -0.1      | -0.399    | -0.281    | 0.047    | 0.132  | 0.117     | 0.079  |



|            |          |           |           |        |           |        |           |        |
|------------|----------|-----------|-----------|--------|-----------|--------|-----------|--------|
| A018176_01 | -0.33    | -0.272    | -0.511 NA |        | -0.246    | -0.403 | -0.187    | -0.028 |
| A018179_01 | 0.317    | 0.174     | -0.041    | -0.114 | 0.342     | 0.496  | 0.261     | -0.007 |
| A018182_01 | -0.047   | -0.18     | -0.082    | 0.542  | -0.046    | -0.154 | -0.143    | -0.293 |
| A018183_01 | -0.546   | -0.627    | -0.545    | -0.322 | -0.371    | -0.113 | -0.282    | -0.144 |
| A018185_01 | 0.312    | -0.067    | -0.215    | -0.07  | -0.074    | -0.046 | -0.002    | -0.124 |
| A018189_01 | -1.571   | -1.469    | -0.915    | -0.182 | -0.359    | -0.026 | -0.173    | 0.072  |
| A018193_01 | 0.28     | 0.22      | -0.13 NA  |        | 0.359     | -0.115 | -0.072    | -0.331 |
| A018195_01 | -0.041   | 0.067     | 0.141     | 0.298  | 0.048     | 0.214  | -0.093    | -0.153 |
| A018200_01 | 0.041    | -0.24     | -0.147    | 0.219  | 0.041     | -0.031 | -0.083    | -0.219 |
| A018204_01 | 0.355    | 0.335     | -0.048    | 0.187  | 0.11 NA   |        | 0.019 NA  |        |
| A018205_01 | 0.007    | -0.019    | -0.111    | 0.093  | 0.259     | 0.291  | 0.159     | -0.198 |
| A018206_01 | -0.452   | -0.486 NA |           | -0.503 | 0.169     | 0.153  | -0.051    | -0.161 |
| A018207_01 | 0.281    | 0.323     | 0.249     | -0.663 | 0.168     | 0.154  | 0.006     | 0.134  |
| A018210_01 | 0.266    | 0.198     | -0.052    | -0.127 | 0.021     | 0.303  | 0.138     | 0.044  |
| A018211_01 | -0.419   | -0.48     | -0.092    | 0.1    | -0.2      | -0.463 | 0.056     | -0.146 |
| A018214_01 | -0.768   | -0.725    | -0.264    | -0.391 | -0.195    | -0.068 | -0.268    | -0.157 |
| A018216_01 | 0.272    | 0.044 NA  |           | 0.087  | 0.058     | -0.058 | 0.015 NA  |        |
| A018226_01 | 0.069 NA |           | -0.499    | 0.202  | -0.053 NA |        | -0.273    | -0.091 |
| A018234_01 | -0.293   | -0.174 NA |           | 0.087  | -0.221    | -0.279 | -0.36 NA  |        |
| A018237_01 | -0.15    | -0.236    | -0.101    | 0.518  | -0.285    | -0.793 | -0.187    | -0.137 |
| A018239_01 | -0.681   | -1.388 NA | NA        |        | -0.218    | -0.783 | -0.479    | -0.643 |
| A018240_01 | 0.55     | 0.512     | 0.495     | 0.207  | 0.324     | 0.812  | 0.164     | 0.174  |
| A018241_01 | -0.053   | -0.061    | 0.116     | -0.201 | 0.178     | 0.052  | 0.153     | 0.027  |
| A018242_01 | 0.036    | -0.176    | -0.316    | -0.083 | -0.111 NA |        | -0.154    | -0.16  |
| A018243_01 | -0.217   | -0.337    | -0.251    | -0.261 | 0.014     | -0.103 | 0.09      | 0.008  |
| A018248_01 | 0.118    | 0.1       | -0.001    | 0.178  | 0.186 NA  |        | -0.036    | -0.315 |
| A018249_01 | 0.329 NA |           | 0.111 NA  |        | -0.003 NA |        | 0.033     | -0.189 |
| A018251_01 | 1.006    | 1.288     | 1.393     | 1.179  | 0.65      | 0.587  | 0.845     | 0.905  |
| A018253_01 | 0.355    | 0.271     | -0.095    | -0.445 | 0.071     | 0.193  | -0.138    | -0.127 |
| A018254_01 | 0.117    | 0.144     | 0.001     | -0.278 | 0.214     | 0.15   | 0.152     | 0.074  |
| A018256_01 | 0.447    | 0.28      | 0.039     | -0.109 | 0.211     | 0.27   | 0.199     | 0.13   |
| A018258_01 | -0.196   | -0.265    | -0.373    | -0.387 | 0.061     | 0.07   | 0.144     | 0.1    |
| A018259_01 | -2.463   | -2.53     | -1.661    | -1.478 | -1.155    | -1.427 | -0.746    | -0.636 |
| A018264_01 | -0.138   | 0.281     | 0.285     | 0.031  | 0.222     | 0.364  | 0.168     | 0.1    |
| A018266_01 | -0.003   | -0.182    | 0.095     | -0.322 | 0.131     | 0.155  | 0.008     | -0.055 |
| A018267_01 | -0.118   | -0.208    | 0.259     | -0.032 | 0.131     | 0.27   | 0.131     | 0.196  |
| A018269_01 | 0.546    | 0.397     | 0.516     | 0.77   | 0.474     | 0.612  | 0.562     | 0.315  |
| A018270_01 | -0.929   | -1.049    | -0.354    | -0.718 | -0.318    | -0.445 | 0.138     | -0.104 |
| A018272_01 | -0.298   | -0.515    | 0.092     | -0.226 | -0.061    | -0.172 | -0.175    | -0.182 |
| A018273_01 | 0.405    | 0.194     | 0.373     | 0.086  | 0.275     | 0.18   | 0.076     | 0.007  |
| A018276_01 | -0.43    | -0.316    | -0.056    | 0.302  | -0.191    | -0.21  | -0.339    | -0.329 |
| A018277_01 | 0.16     | 0.189     | -0.173    | 0.021  | -0.023    | -0.042 | -0.295    | -0.179 |
| A018280_01 | -0.322   | -0.579    | -0.126    | -0.298 | 0.086     | -0.17  | 0.099     | -0.033 |
| A018297_01 | 0.073    | -0.053    | 0.13      | 0.075  | -0.428    | -0.345 | -0.248    | -0.133 |
| A018300_01 | 0.734    | 0.588     | 0.192     | 0.478  | 0.273     | 0.331  | 0.179     | 0.215  |
| A018304_01 | 0.227    | 0.073     | 0.166     | 0.146  | 0.005     | -0.318 | -0.146 NA |        |
| A018307_01 | -0.357   | -0.453    | -0.461    | -0.214 | -0.26     | -0.16  | -0.162    | -0.096 |
| A018308_01 | 0.188    | 0.458     | 1.308     | 0.962  | 0.785     | 0.919  | 0.557     | 0.464  |
| A018312_01 | 0.282    | 0.566     | 0.602     | 0.256  | 0.041     | 0.054  | 0.065     | 0.051  |
| A018314_01 | 0.157    | -0.103    | 0.151     | -0.036 | 0.003     | -0.104 | -0.122    | -0.265 |
| A018315_01 | -0.022   | -0.347    | 0.115     | 0.019  | -0.124 NA |        | 0.006     | -0.185 |
| A018319_01 | -0.253   | -0.377    | -0.521    | -0.021 | 0.375     | 0.617  | -0.16     | -0.267 |
| A018321_01 | -0.264   | -0.54     | 0.031     | 0.228  | -0.001 NA |        | 0.059 NA  |        |
| A018323_01 | 0.053    | 0.298     | -0.079    | -0.003 | -0.04 NA  |        | 0.1 NA    |        |
| A018330_01 | 0.171    | 0.104     | 0.189     | -0.229 | 0.383     | 0.203  | 0.254     | 0.139  |
| A018334_01 | 0.78     | 0.608     | -0.182    | -0.194 | -0.021    | 0.464  | -0.156    | -0.156 |
| A018338_01 | -0.098   | -0.127    | 0.01      | -0.012 | 0.082     | -0.064 | -0.049    | 0.053  |
| A018340_01 | 0.307    | 0.16      | 0.209 NA  |        | 0.27 NA   |        | 0.052 NA  |        |
| A018343_01 | 0.343    | 0.123     | 0.133     | 0.376  | 0.187     | -0.077 | 0.116     | -0.138 |
| A018344_01 | 0.149    | 0.102     | 0.331     | 0.107  | -0.072 NA |        | 0.038     | -0.323 |
| A018348_01 | 0.264    | 0.33      | 0.293     | 0.705  | 0.226     | 0.123  | -0.011    | -0.021 |
| A018349_01 | 0.075    | 0.29      | 0.371     | 0.212  | 0.121     | -0.032 | 0.731     | 0.715  |
| A018354_01 | -0.636   | -0.608    | 0.128     | 0.202  | -0.117    | -0.08  | 0.152     | 0.026  |
| A018355_01 | -0.337   | -0.721    | 0.167     | 0.317  | -0.675 NA |        | -0.276    | -0.32  |
| A018357_01 | -0.151   | -0.131    | 0.539     | -0.089 | -0.143    | -0.139 | 0.141     | 0.185  |
| A018358_01 | -0.093   | 0.412     | 0.039     | 0.077  | -0.138    | 0.253  | -0.189    | 0.208  |
| A018362_01 | 0.178    | 0.08      | -0.175    | 0.142  | 0.297     | 0.134  | -0.354 NA |        |
| A018371_01 | 0.2      | 0.23      | 0.063     | -0.392 | 0.026     | 0.122  | -0.044    | 0.075  |

|            |          |           |          |           |           |           |           |        |
|------------|----------|-----------|----------|-----------|-----------|-----------|-----------|--------|
| A018373_01 | -0.356   | -0.531    | -0.288   | -0.58     | 0.046     | -0.09     | 0.134     | 0.101  |
| A018377_01 | 0.099    | -0.014    | 0.137    | 0.003     | 0.002     | -0.14     | -0.025    | -0.165 |
| A018384_01 | 0.228    | -0.009    | -0.03    | -0.677 NA |           | 0.078     | 0.359     | -0.049 |
| A018386_01 | -0.194   | -0.153    | -0.066   | -0.004    | 0.167     | -0.007    | -0.083    | -0.075 |
| A018393_01 | -0.165   | -0.155    | -0.381   | 0.218     | -0.397    | -0.551    | -0.185 NA |        |
| A018395_01 | 0.032    | -0.229    | -0.478   | -0.21     | -0.188    | -0.401    | -0.249    | -0.267 |
| A018397_01 | -0.157   | -0.204    | 0.023    | -0.251    | -0.037    | 0.061     | -0.039    | -0.036 |
| A018399_01 | 0.038    | 0.026     | -0.353   | 0.324     | 0.103     | 0.048     | -0.274    | -0.135 |
| A018406_01 | 0.625    | 0.28      | 0.104    | -0.044    | 0.095     | 0.168     | -0.121    | -0.226 |
| A018411_01 | 0.101    | 0.07      | 0.289    | 0.31      | 0.093     | 0.171     | -0.092 NA |        |
| A018412_01 | -0.241   | -0.207    | -0.623   | 0.012     | -0.312    | -0.052    | -0.3 NA   |        |
| A018421_01 | 0.027    | 0.157     | 0        | 0.482     | 0.045     | 0.22      | -0.027    | 0.042  |
| A018423_01 | -0.643   | -0.777    | -0.09    | -0.465    | 0.077     | -0.211    | 0.261     | 0.141  |
| A018426_01 | 0.155    | -0.008    | 0.073    | -0.177    | -0.019    | -0.2      | -0.043    | -0.166 |
| A018427_01 | -0.103   | -0.151    | -0.005   | 0.018     | 0.114     | 0.038     | -0.152    | -0.251 |
| A018428_01 | 0.053    | 0.037     | -0.413   | 0.513     | -0.099    | -0.228    | -0.102    | -0.172 |
| A018432_01 | -0.078   | -0.364    | -0.057   | -0.132    | -0.023    | -0.08     | 0.304     | 0.07   |
| A018440_01 | -0.567   | -0.853    | -0.243   | -0.355    | -0.083    | -0.295    | -0.35 NA  |        |
| A018442_01 | -0.317   | -0.458    | 0.103    | -0.237    | 0.023     | -0.153    | 0.319     | 0.015  |
| A018445_01 | -0.047   | -0.055    | 0.128    | 0.267     | 0.189     | -0.011    | -0.019    | -0.047 |
| A018446_01 | 0.519    | 0.23      | 0.479    | -0.277    | 0.226     | 0.174     | 0.241     | 0.066  |
| A018448_01 | 0.326    | 0.227     | -0.125   | -0.169    | 0.174     | 0.088     | -0.162    | -0.252 |
| A018450_01 | 0.991    | 0.791     | 0.711    | 1.422     | 0.435     | 0.161     | 0.738     | 0.47   |
| A018454_01 | 0.159    | 0.053     | -0.081   | 0.126     | 0.101     | 0.038     | -0.049    | -0.16  |
| A018460_01 | -0.245   | -0.411    | -0.922   | -0.886    | 0.087     | -0.166    | -0.231    | -0.465 |
| A018461_01 | 0.211    | 0.513     | 0.148    | -0.497    | -0.333    | -0.126    | -0.218    | 0.105  |
| A018466_01 | -0.458   | -0.458    | 0.063    | 0.398     | -0.075    | -0.262    | 0.15      | 0.126  |
| A018467_01 | 1.061    | 1.079     | 1.316    | 1.315     | 0.273     | 0.333     | 0.495     | 0.449  |
| A018477_01 | -0.193   | -0.042    | -0.003   | -0.22     | -0.193    | -0.084    | -0.157    | -0.213 |
| A018480_01 | -0.093   | 0.095     | 0.154    | -0.45     | 0.035     | 0.105     | -0.134    | -0.028 |
| A018484_01 | 0.499    | 0.359     | -0.289   | -0.216    | 0.123     | 0.297     | -0.073    | 0.03   |
| A018486_01 | 0.145    | -0.041    | 0.285    | -0.202    | 0.332     | -0.002    | -0.068    | -0.167 |
| A018488_01 | 0.648    | 0.594     | 0.006    | 0.486     | 0.333     | 0.36      | 0.35      | 0.26   |
| A018497_01 | 0.19     | 0.196     | 0.272    | -0.488    | 0.278     | 0.283     | 0.12      | 0.002  |
| A018499_01 | 0.462    | 0.266     | 0.322    | 0.036     | 0.311     | 0.129     | 0.01 NA   |        |
| A018500_01 | -0.111   | -0.3      | -0.048   | 0.223     | -0.036    | -0.286    | 0.099     | -0.116 |
| A018501_01 | 0.173    | 0.281     | 0.346    | 0.375     | 0.121     | 0.226     | 0.211     | 0.229  |
| A018502_01 | 0.025    | 0.129     | 0.435    | 0.333     | -0.068    | 0         | 0.207     | 0.176  |
| A018505_01 | 0.303    | 0.374     | 0.05     | -0.684    | 0.281     | 0.244     | 0.025     | 0.024  |
| A018506_01 | 0.489    | 0.431     | 0.244    | 0.468     | -0.246    | -0.333    | -0.168    | -0.333 |
| A018510_01 | -0.56    | -0.74     | -0.394   | -0.401    | -0.372    | -0.382    | -0.048    | -0.08  |
| A018516_01 | -0.383   | -0.414    | -0.701   | -0.867    | -0.307    | -0.356    | -0.298    | -0.345 |
| A018517_01 | -0.132   | -0.324    | 0.046    | 0.263     | -0.009    | -0.212    | -0.125    | -0.242 |
| A018518_01 | 0.33     | 0.289     | 0.229    | 0.044     | 0.172     | 0.229     | -0.222    | -0.353 |
| A018519_01 | 0.211    | 0.192     | 0.033    | 0.008     | 0.155     | 0.111     | 0.015     | -0.202 |
| A018520_01 | 0.368    | 0.228     | 0.122    | 0.317     | -0.071    | 0         | 0.066     | 0.111  |
| A018522_01 | 0.241    | 0.251     | -0.172   | 0         | 0.179     | 0.184     | -0.074    | -0.051 |
| A018523_01 | -0.06    | 0.082 NA  | NA       | NA        | 0.173     | -0.12     | -0.253 NA |        |
| A018528_01 | 0.029 NA |           | -0.161   | -0.086    | 0.172     | 0.032     | -0.208    | -0.136 |
| A018530_01 | 0.527    | 0.617     | 0.398 NA |           | 0.114     | -0.027 NA | NA        |        |
| A018531_01 | 0.358    | 0.001     | 0.137    | -0.505    | 0.284     | 0.199     | 0.201     | 0.186  |
| A018533_01 | 0.082    | -0.298    | -0.43    | -0.104    | 0.147     | 0.147     | -0.113    | -0.14  |
| A018536_01 | 0.131    | 0.165     | 0.098    | 0.323     | -0.003    | 0.05      | -0.043 NA |        |
| A018545_01 | -0.062   | -0.05     | 0.38     | -0.138    | -0.166    | -0.288    | 0.261     | 0.013  |
| A018554_01 | -0.05    | -0.12     | 0.22     | -0.714    | 0.125     | -0.107    | 0.216 NA  |        |
| A018560_01 | -0.248   | -0.43     | -0.295   | -0.155    | -0.278    | -0.156    | -0.192    | -0.061 |
| A018561_01 | 0.471    | 0.506     | -0.295   | -0.148    | 0.288     | 0.22      | -0.018    | -0.119 |
| A018563_01 | 0.396    | 0.073     | -0.288   | 0.168     | 0.216     | 0.045     | -0.097    | -0.263 |
| A018564_01 | -0.148   | 0.038     | -0.314   | -0.183    | 0.11      | 0.038     | -0.237    | -0.261 |
| A018566_01 | 0.435 NA | NA        |          | -0.166    | 0.204 NA  |           | -0.141 NA |        |
| A018568_01 | 0.762 NA |           | 0.325    | -0.025    | -0.365 NA |           | 0.295     | -0.035 |
| A018575_01 | 0.323    | 0.238     | 0.442    | -0.144    | 0.203     | 0.195     | 0.271     | 0.222  |
| A018581_01 | -0.255   | -0.344    | -0.571   | -1.172    | 0.073     | 0.04      | -0.222    | -0.281 |
| A018583_01 | -0.323   | -0.402    | -0.136   | 0.022     | -0.205    | -0.391    | 0.389     | 0.06   |
| A018587_01 | -0.265   | -0.366 NA |          | -0.161    | 0.067     | -0.201    | 0.031     | -0.204 |
| A018589_01 | 0.126    | -0.061    | 0.453    | 0.402     | 0.287     | -0.125    | 0.256 NA  |        |
| A018590_01 | 0.538    | 0.34      | -0.009   | -0.437    | 0.271     | 0.465     | 0.245 NA  |        |
| A018591_01 | -0.08    | -0.074    | 0.142    | 0.049     | 0.223     | 0.074     | -0.075    | -0.01  |

|            |        |        |        |        |        |        |        |        |
|------------|--------|--------|--------|--------|--------|--------|--------|--------|
| A018598_01 | -0.083 | NA     | NA     | -0.573 | 0.048  | NA     | NA     | -0.255 |
| A018600_01 | 0.098  | 0.259  | -0.996 | -0.522 | 0.001  | 0.067  | -0.024 | 0.23   |
| A018604_01 | 0.337  | 0.437  | -0.352 | -0.1   | 0.12   | 0.094  | -0.252 | -0.231 |
| A018607_01 | -0.884 | -0.806 | -1.703 | -1.459 | -0.104 | 0.137  | -0.763 | -0.628 |
| A018613_01 | -0.601 | -0.663 | -0.216 | 0.272  | -0.762 | -1.131 | -0.595 | NA     |
| A018617_01 | -0.406 | -0.655 | -0.088 | -0.071 | -0.096 | 0.05   | -0.08  | -0.037 |
| A018618_01 | -0.978 | -0.763 | -0.225 | 0.019  | -0.372 | -0.213 | -0.145 | -0.061 |
| A018620_01 | -0.083 | -0.241 | 0.037  | 0.429  | 0.022  | -0.329 | -0.08  | -0.073 |
| A018621_01 | 0.11   | 0.082  | -0.339 | -0.242 | 0.355  | 0.12   | 0.002  | -0.062 |
| A018625_01 | -0.392 | -0.387 | -0.663 | -0.261 | 0.041  | 0.108  | -0.025 | -0.093 |
| A018628_01 | -0.1   | -0.23  | -0.126 | -0.435 | -0.032 | -0.182 | -0.061 | -0.083 |
| A018630_01 | -0.016 | -0.138 | -0.246 | -0.483 | 0.245  | 0.198  | 0.294  | 0.107  |
| A018635_01 | 0.184  | -0.027 | 0.06   | 0.337  | 0.214  | 0.085  | 0.553  | 0.307  |
| A018637_01 | 0.169  | 0.113  | 0.007  | -0.183 | 0.074  | 0.241  | 0.123  | 0.041  |
| A018638_01 | -0.043 | -0.154 | -0.243 | 0.011  | -0.478 | -0.765 | -0.243 | -0.226 |
| A018647_01 | -0.056 | -0.206 | -0.107 | -0.034 | -0.197 | -0.229 | 0.194  | 0.062  |
| A018649_01 | -0.062 | 0.031  | 0.088  | -0.053 | 0.093  | 0.15   | 0.061  | -0.099 |
| A018652_01 | 0.548  | 0.211  | -0.116 | -0.26  | 0.29   | NA     | -0.004 | -0.171 |
| A018655_01 | -0.845 | -0.762 | -1.562 | -1.663 | -0.314 | -0.08  | -0.785 | -0.748 |
| A018662_01 | 0.081  | -0.225 | 0.083  | 0.124  | -0.4   | -0.783 | -0.119 | -0.222 |
| A018663_01 | -0.233 | -0.19  | -0.013 | 0.015  | -0.001 | -0.115 | -0.049 | -0.15  |
| A018665_01 | -1.166 | -0.977 | -0.032 | -0.431 | -0.731 | -0.503 | 0.11   | 0.145  |
| A018666_01 | 0.488  | 0.224  | 0.171  | 0.104  | 0.253  | 0.205  | 0.002  | -0.305 |
| A018667_01 | 0.05   | -0.062 | -0.018 | -0.189 | 0.286  | 0.251  | 0.22   | 0.057  |
| A018672_01 | -0.519 | -0.7   | -0.898 | -0.814 | -0.583 | -0.462 | -0.461 | -0.489 |
| A018673_01 | 0.834  | 0.875  | 0.337  | 1.099  | 0.602  | 0.861  | 0.843  | 0.684  |
| A018675_01 | 0.524  | 0.33   | 0.175  | -0.155 | 0.176  | 0.239  | 0.034  | 0.032  |
| A018678_01 | -0.726 | -0.64  | -0.7   | -0.311 | -0.429 | -0.558 | 0.003  | -0.055 |
| A018682_01 | -0.268 | -0.063 | 0.329  | 0.081  | 0.026  | 0.098  | -0.075 | -0.077 |
| A018686_01 | 0.805  | 0.46   | 0.512  | 0.276  | -0.11  | -0.049 | 0.385  | 0.308  |
| A018687_01 | -0.025 | -0.12  | NA     | NA     | 0.999  | 1.249  | NA     | -1.366 |
| A018688_01 | -0.341 | -0.537 | -0.045 | -0.274 | 0.186  | 0.104  | -0.14  | -0.026 |
| A018694_01 | 0.169  | -0.009 | -0.166 | 0.329  | -0.34  | NA     | -0.09  | -0.325 |
| A018696_01 | 0.153  | 0.135  | 0.032  | -0.476 | 0.19   | 0.16   | 0.165  | 0.1    |
| A018699_01 | -0.092 | -0.06  | -0.297 | -1.01  | 0.125  | 0.245  | 0.081  | 0.18   |
| A018707_01 | 0.219  | 0.067  | 0.3    | -0.28  | 0.197  | 0.172  | 0.174  | 0.085  |
| A018708_01 | -0.087 | 0.05   | 0.259  | 0.369  | -0.07  | 0.1    | -0.113 | 0.045  |
| A018709_01 | -1.098 | -1.067 | -0.956 | -1.042 | -0.994 | -0.767 | -0.586 | -0.651 |
| A018710_01 | 0.008  | -0.173 | -0.421 | 0.188  | 0.143  | -0.152 | -0.23  | -0.185 |
| A018711_01 | 0.288  | 0.353  | 0.63   | -0.106 | 0.318  | 0.347  | 0.996  | 0.739  |
| A018712_01 | 0.24   | 0.437  | 0.247  | -0.281 | 0.26   | 0.388  | 0.307  | 0.163  |
| A018714_01 | -0.634 | -0.622 | 0.177  | 0.275  | -0.565 | -0.593 | 0.069  | 0.03   |
| A018715_01 | -0.824 | -0.878 | -0.196 | -0.663 | -0.236 | -0.248 | -0.219 | -0.296 |
| A018717_01 | -0.271 | -0.235 | 0.103  | 0.339  | -0.067 | -0.052 | -0.104 | 0.027  |
| A018720_01 | 0.064  | 0.125  | 0.005  | -0.355 | 0.238  | 0.198  | 0.091  | NA     |
| A018723_01 | -0.042 | -0.161 | 0.052  | -0.204 | -0.059 | -0.16  | 0.251  | 0.076  |
| A018737_01 | 0.525  | 0.43   | 0.147  | -0.401 | 0.221  | 0.19   | 0.174  | -0.064 |
| A018742_01 | -0.022 | 0.049  | -0.312 | -0.298 | 0.042  | -0.041 | -0.019 | -0.081 |
| A018746_01 | 0.156  | -0.09  | 0.027  | 0.337  | 0.288  | 0.029  | 0.178  | -0.165 |
| A018753_01 | -0.043 | -0.101 | -0.284 | -0.25  | 0.323  | 0.096  | -0.264 | -0.297 |
| A018758_01 | 0.186  | -0.023 | 0.012  | -0.054 | 0.121  | 0.077  | 0.01   | -0.051 |
| A018771_01 | -0.076 | 0.013  | -0.464 | 0.02   | 0.042  | 0.103  | -0.311 | -0.249 |
| A018772_01 | 0.257  | 0.203  | 0.139  | -0.05  | 0.017  | 0.146  | -0.118 | -0.114 |
| A018774_01 | -1.073 | -0.839 | -0.088 | -0.241 | -0.157 | -0.072 | 0.19   | 0.122  |
| A018778_01 | -0.106 | -0.426 | -0.394 | 0.224  | -0.038 | -0.146 | -0.195 | -0.232 |
| A018779_01 | -0.024 | -0.049 | -0.076 | -0.165 | 0.202  | -0.017 | 0.019  | -0.413 |
| A018781_01 | -1.122 | -0.671 | -0.654 | -1.236 | 0.477  | 0.805  | -0.24  | 0.052  |
| A018786_01 | 0.154  | -0.105 | -0.036 | -0.393 | 0.099  | 0.044  | -0.046 | -0.189 |
| A018793_01 | 0.16   | -0.023 | 0.174  | -0.158 | 0.235  | 0.235  | -0.034 | -0.273 |
| A018795_01 | 0.353  | 0.231  | -0.249 | -0.391 | -0.465 | -0.441 | -0.513 | -0.484 |
| A018803_01 | -0.641 | -1.091 | -0.563 | -0.54  | -0.507 | -1.013 | -0.921 | -0.843 |
| A018807_01 | -0.107 | NA     | -0.026 | -0.063 | -0.048 | NA     | -0.157 | -0.142 |
| A018809_01 | 0.346  | 0.302  | 0.251  | 0.231  | 0.023  | -0.119 | -0.138 | -0.139 |
| A018810_01 | 0.038  | 0.155  | -0.014 | 0.043  | 0.259  | 0.297  | 0.218  | NA     |
| A018812_01 | 0.014  | -0.11  | -0.012 | 0.217  | 0.066  | -0.106 | -0.005 | -0.172 |
| A018814_01 | -1.128 | -1.689 | -0.84  | -0.891 | -0.866 | -0.832 | -0.642 | -0.555 |
| A018815_01 | 0.246  | 0.259  | -0.059 | -0.084 | 0.241  | 0.536  | -0.197 | -0.292 |
| A018816_01 | -0.169 | -0.061 | 0.406  | -0.071 | 0.097  | -0.035 | 0.22   | -0.062 |

|            |        |        |        |        |        |        |        |        |
|------------|--------|--------|--------|--------|--------|--------|--------|--------|
| A018818_01 | -0.138 | -0.098 | -0.017 | -0.13  | -0.009 | 0.144  | -0.311 | -0.105 |
| A018819_01 | 0.746  | 0.475  | 0.385  | 0.464  | 0.226  | 0.303  | 0.071  | -0.14  |
| A018820_01 | 0.727  | 0.858  | 0.285  | -0.178 | 0.436  | 0.76   | 0.132  | -0.045 |
| A018823_01 | -1.97  | -1.988 | -1.42  | -1.343 | -0.838 | -1.002 | -0.947 | -0.828 |
| A018826_01 | -0.287 | -0.521 | -0.139 | 0.082  | -0.345 | -0.472 | -0.266 | -0.435 |
| A018827_01 | -0.27  | -0.608 | -0.456 | -0.918 | -0.132 | -0.118 | -0.386 | -0.507 |
| A018828_01 | 0.199  | 0.037  | -0.382 | 0.012  | 0.003  | -0.157 | -0.118 | -0.213 |
| A018832_01 | 0.172  | 0.376  | -0.194 | -0.006 | 0.097  | -0.034 | -0.117 | -0.124 |
| A018833_01 | 0.261  | 0.347  | 0.39   | 0.397  | 0.18   | 0.193  | 0.342  | 0.134  |
| A018834_01 | 0.498  | 0.178  | 0.204  | -0.145 | -0.037 | 0.124  | 0.094  | -0.067 |
| A018840_01 | 0.376  | 0.04   | -0.024 | 0.166  | -0.067 | -0.196 | -0.149 | -0.095 |
| A018841_01 | -0.618 | -0.501 | -0.41  | -0.394 | -0.313 | 0.013  | -0.049 | 0.071  |
| A018842_01 | 0.637  | 0.342  | 0.189  | 0.031  | 0.04   | 0.017  | 0.049  | -0.008 |
| A018844_01 | 0.082  | -0.017 | -0.09  | 0.214  | -0.008 | -0.034 | 0.016  | -0.036 |
| A018848_01 | -0.311 | -0.184 | -0.178 | 0.218  | 0.047  | 0.054  | -0.136 | -0.037 |
| A018849_01 | -0.267 | 0.936  | 0.763  | 0.882  | -0.097 | 0.174  | 0.722  | 0.296  |
| A018851_01 | 0.293  | 0.278  | 0.045  | -0.14  | 0.157  | 0.188  | -0.095 | -0.047 |
| A018852_01 | 0.03   | -0.092 | -0.086 | -0.797 | -0.138 | -0.233 | -0.376 | -0.37  |
| A018862_01 | 0.641  | 0.574  | 0.368  | -0.032 | 0.042  | 0.022  | 0.201  | 0.214  |
| A018863_01 | 0.244  | 0.011  | -0.218 | -0.109 | 0.1    | 0.131  | -0.233 | -0.215 |
| A018864_01 | 0.107  | 0.102  | 0.052  | -0.442 | 0.276  | 0.241  | 0.208  | -0.032 |
| A018867_01 | -0.573 | -0.62  | -0.236 | -0.026 | -0.191 | -0.438 | -0.092 | -0.146 |
| A018869_01 | 0.576  | 0.758  | -0.157 | 0.25   | -0.279 | -0.062 | -0.614 | -0.406 |
| A018871_01 | 0.235  | 0.029  | 0.457  | 0.176  | 0.189  | 0.223  | 0.444  | 0.312  |
| A018875_01 | 0.435  | 0.425  | 0.275  | 0.085  | 0.173  | 0.4    | 0.387  | 0.199  |
| A018889_01 | 0.21   | 0.187  | -0.183 | 0.133  | 0.098  | 0.016  | 0.1    | -0.094 |
| A018891_01 | 1.268  | 1.262  | 0.624  | 1.41   | -0.81  | -1.135 | -1.518 | -1.262 |
| A018894_01 | -0.225 | -0.138 | 0.046  | 0.301  | -0.041 | -0.149 | 0.014  | -0.004 |
| A018896_01 | -0.042 | 0.219  | -0.011 | -0.625 | 0.073  | 0.225  | 0.183  | 0.216  |
| A018897_01 | -0.608 | -0.615 | -0.278 | -0.075 | -0.261 | -0.217 | 0.034  | 0.054  |
| A018899_01 | -0.077 | -0.109 | -0.152 | -0.426 | -0.163 | -0.284 | -0.363 | NA     |
| A018904_01 | 0.275  | 0.424  | 0.069  | 0.355  | 0.083  | 0.071  | -0.019 | -0.077 |
| A018906_01 | 0.765  | 0.599  | 0.433  | 0.342  | 0.271  | 0.282  | 0.04   | 0.057  |
| A018908_01 | 0.513  | 0.253  | 0.183  | -0.063 | 0.343  | 0.032  | 0.153  | -0.02  |
| A018909_01 | 0.125  | -0.263 | -0.408 | 0.261  | -0.071 | -0.336 | -0.461 | -0.495 |
| A018911_01 | -1.374 | -1.235 | -0.955 | -0.936 | -0.705 | -0.294 | -0.349 | -0.165 |
| A018912_01 | 0.158  | 0.063  | 0.14   | 0.172  | 0.19   | 0.231  | 0.071  | -0.017 |
| A018914_01 | -0.459 | -0.549 | -0.224 | -0.242 | -0.206 | -0.376 | -0.081 | -0.199 |
| A018915_01 | 0.076  | 0.174  | 0.428  | 0.699  | -0.053 | -0.005 | 0.465  | 0.326  |
| A018919_01 | 0.259  | 0.261  | 0.375  | -0.295 | 0.24   | 0.287  | 0.288  | 0.165  |
| A018920_01 | 0.491  | 0.252  | 0.01   | -0.033 | 0.067  | 0.258  | -0.017 | -0.063 |
| A018921_01 | -0.266 | -0.317 | -0.935 | -0.857 | -0.009 | -0.188 | NA     | NA     |
| A018922_01 | 0.065  | -0.087 | 0.065  | 0.203  | -0.118 | -0.296 | -0.023 | 0.023  |
| A018924_01 | 0.717  | 0.374  | 0.49   | 0.351  | 0.01   | -0.084 | 0.054  | -0.124 |
| A018925_01 | -0.009 | -0.189 | 0.182  | -0.096 | 0.094  | 0.14   | -0.462 | -0.352 |
| A018931_01 | 0.391  | 0.362  | 0.461  | 0.383  | 0.166  | 0.034  | 0.053  | 0.004  |
| A018932_01 | -0.06  | -0.303 | -0.044 | -0.572 | 0.191  | 0.073  | 0.172  | 0.09   |
| A018933_01 | -0.839 | -0.962 | -0.5   | -0.741 | -0.305 | -0.4   | -0.382 | -0.462 |
| A018934_01 | 0.798  | 0.79   | 0.244  | 0.996  | 0.599  | 0.635  | 0.861  | 0.667  |
| A018935_01 | -2.459 | -2.635 | NA     | -1.24  | -1.469 | -1.561 | 0.057  | -0.04  |
| A018936_01 | 0.047  | -0.013 | 0.042  | 0.159  | 0.114  | -0.115 | -0.015 | -0.033 |
| A018937_01 | -1.604 | -1.864 | -0.91  | -1.107 | -0.356 | -0.41  | -0.703 | -0.497 |
| A018942_01 | -0.128 | -0.246 | -0.652 | -0.326 | -0.022 | 0.064  | -0.111 | -0.14  |
| A018949_01 | 0.552  | 0.184  | 0.181  | 0.373  | -0.092 | -0.322 | -0.527 | -0.44  |
| A018950_01 | -0.358 | -0.209 | NA     | 0.026  | 0.179  | -0.112 | -0.149 | 0.033  |
| A018952_01 | -0.182 | 0.204  | 0.177  | -0.219 | 0.395  | 0.514  | -0.049 | 0.19   |
| A018955_01 | -0.054 | -0.217 | -0.001 | 0.103  | -0.138 | -0.259 | -0.029 | -0.014 |
| A018959_01 | 0.432  | 0.044  | 0.228  | 0.203  | 0.3    | 0.186  | -0.153 | -0.227 |
| A018961_01 | 0.132  | 0.03   | -0.022 | -0.114 | 0.15   | -0.05  | 0.241  | -0.096 |
| A018963_01 | 1.047  | 0.895  | 0.116  | -0.169 | 0.197  | NA     | 0.1    | 0.054  |
| A018964_01 | 0.338  | 0.127  | -0.084 | -0.227 | 0.336  | 0.324  | -0.086 | -0.226 |
| A018970_01 | 0.235  | 0.258  | 0.172  | 0.389  | -0.217 | -0.218 | -0.444 | NA     |
| A018973_01 | -0.07  | -0.172 | 0.069  | -0.129 | 0.05   | -0.142 | 0.026  | 0.047  |
| A018974_01 | 0.814  | 0.624  | 0.633  | 0.625  | 0.379  | 0.373  | 0.108  | -0.079 |
| A018975_01 | -0.531 | -0.564 | 0.189  | 0.353  | 0.079  | -0.159 | 0.048  | -0.027 |
| A018979_01 | 0.623  | 0.288  | 0.729  | 0.71   | 0.191  | 0.151  | 0.315  | 0.138  |
| A018982_01 | -0.173 | -0.189 | 0.01   | -0.131 | 0.107  | -0.017 | -0.162 | NA     |
| A018983_01 | 0.564  | 0.482  | 0.608  | 0.346  | 0.088  | 0.332  | 0.342  | 0.102  |

|            |           |        |        |           |           |        |           |        |
|------------|-----------|--------|--------|-----------|-----------|--------|-----------|--------|
| A018986_01 | -0.153    | -0.404 | 0.036  | 0.146     | -0.211    | -0.032 | 0.293     | 0.006  |
| A018988_01 | -0.29     | -0.207 | 0.02   | 0.07      | 0.019     | -0.114 | -0.131    | 0.065  |
| A018991_01 | 0.782 NA  |        | 0.205  | 0.544     | 0.227 NA  |        | 0.082     | 0.166  |
| A018992_01 | -0.002    | -0.333 | 0.028  | 0.323     | -0.064    | -0.229 | 0.008     | -0.057 |
| A018998_01 | 0.389     | -0.001 | -0.11  | 0.083     | 0.279     | 0.161  | -0.002    | -0.046 |
| A019000_01 | -0.042    | -0.488 | -0.295 | -0.319    | 0.217     | 0.123  | 0.022     | -0.123 |
| A019002_01 | 0.64      | 0.847  | 1.639  | 1.74      | 0.702     | 0.853  | 0.008     | 0.229  |
| A019012_01 | -0.175    | -0.204 | 0.081  | -0.17     | 0.09      | -0.18  | 0.025     | -0.098 |
| A019014_01 | -0.516    | -0.435 | -0.593 | -0.687    | -0.225    | 0.012  | -0.277    | -0.125 |
| A019017_01 | 0.556     | 0.303  | -0.084 | -0.845    | 0.291     | 0.355  | 0.241 NA  |        |
| A019021_01 | -0.25     | -0.166 | 0.075  | -0.548    | -0.254    | -0.307 | 0.016     | 0.033  |
| A019022_01 | -0.112    | -0.132 | -1.358 | -1.123    | -0.157    | -0.121 | -0.476    | -0.342 |
| A019026_01 | 0.488     | 0.306  | 0.285  | -0.181    | 0.376 NA  |        | 0.32      | 0.073  |
| A019027_01 | 0.665     | 0.563  | 0.815  | 0.102     | 0.254     | 0      | 0.357     | 0.041  |
| A019032_01 | -0.903    | -0.793 | 0.295  | 0.29      | -0.74     | -1.259 | -0.145    | -0.04  |
| A019033_01 | 0.412     | 0.305  | 0.286  | 0.168     | 0.219 NA  |        | 0.4       | 0.045  |
| A019040_01 | -0.109    | -0.254 | -0.314 | 0.262     | -0.052    | -0.085 | -0.161    | -0.232 |
| A019041_01 | -0.303    | -0.235 | 0.182  | 0.302     | -0.129    | -0.155 | -0.375    | -0.062 |
| A019043_01 | -0.084    | -0.052 | -0.348 | -0.927    | 0.419     | 0.399  | -0.466    | -0.287 |
| A019046_01 | -0.476    | -0.349 | -0.334 | -0.883    | 0.157     | 0.318  | -0.328    | -0.084 |
| A019047_01 | 0.324     | 0.339  | 0.123  | -0.186 NA | NA        |        | 0.154     | 0.193  |
| A019049_01 | -0.193    | -0.128 | -0.332 | 0.138     | -0.182    | -0.079 | -0.112    | -0.193 |
| A019050_01 | -0.935    | -0.843 | -0.207 | -0.038    | -0.172    | -0.301 | -0.1      | -0.157 |
| A019053_01 | 0.479     | 0.518  | -0.115 | 0.129     | 0.213     | 0.027  | -0.097    | -0.165 |
| A019057_01 | -0.732    | -0.474 | -0.353 | -0.139    | 0.088     | 0.114  | -0.073    | 0.007  |
| A019059_01 | 0.109     | -0.452 | -0.235 | 0.389     | 0.231     | -0.201 | -0.023    | -0.364 |
| A019060_01 | 0.137     | 0.14   | -0.059 | 0.162     | -0.147    | 0.165  | 0.123     | 0.158  |
| A019064_01 | 0.046     | 0.066  | -0.161 | 0.078     | 0.069     | 0.031  | -0.109    | -0.068 |
| A019068_01 | 0.334     | -0.007 | 0.121  | 0.129     | 0.328     | 0.149  | 0.295     | 0.163  |
| A019074_01 | -0.467 NA |        | -0.531 | 0.084     | -0.423 NA |        | -0.382    | -0.193 |
| A019081_01 | 0.241     | 0.176  | -0.166 | -0.128    | 0.03      | 0.179  | 0.1       | 0.019  |
| A019086_01 | -0.425    | -0.315 | -0.764 | -0.705    | -0.265    | -0.197 | -0.396    | -0.288 |
| A019089_01 | -0.027    | 0.406  | -0.054 | -0.427    | -0.027    | 0.205  | 0.238 NA  |        |
| A019092_01 | 0.552     | 0.621  | -0.105 | -0.253    | 0.426     | 0.278  | 0.034     | 0.12   |
| A019094_01 | -0.306    | -0.255 | -0.818 | -0.666    | -0.085    | -0.119 | -0.259 NA |        |
| A019098_01 | 0.02      | -0.156 | 0.312  | 0.093     | 0.148     | -0.146 | 0.285     | -0.079 |
| A019106_01 | -0.092    | -0.255 | 0.128  | -0.018    | 0.189     | -0.176 | -0.208    | -0.266 |
| A019110_01 | -0.124    | -0.047 | -0.119 | -0.235    | -0.2      | 0.008  | -0.294    | -0.055 |
| A019116_01 | -0.248    | -0.122 | -0.398 | 0.142     | 0.104     | 0.142  | -0.122    | -0.009 |
| A019127_01 | -0.468    | -0.702 | -0.243 | 0.071     | -0.68 NA  |        | -0.195    | -0.258 |
| A019139_01 | -0.198    | -0.026 | -0.519 | -0.154    | -0.566    | -0.172 | -0.318    | -0.189 |
| A019143_01 | 0.153     | -0.042 | 0.193  | 0.204     | 0.143     | -0.265 | 0.261     | 0.007  |
| A019145_01 | 0.17      | 0.499  | 1.008  | 0.714     | -0.556    | -0.976 | 0.018     | -0.025 |
| A019146_01 | -0.086    | -0.263 | 0.207  | 0.061     | -0.075    | -0.43  | -0.151    | -0.295 |
| A019151_01 | -0.329    | -0.244 | -0.312 | 0.095     | 0.132     | 0      | 0.006     | -0.2   |
| A019155_01 | -0.113    | -0.247 | 0.331  | 0.129     | 0.12      | 0.036  | 0.128     | -0.016 |
| A019171_01 | 0.474     | 0.399  | -0.209 | -0.127    | 0.063     | 0.538  | 0.007     | 0.121  |
| A019174_01 | 0.056     | 0.075  | 0.152  | -0.704    | 0.222     | 0.307  | 0.029     | 0.18   |
| A019181_01 | 0.379     | 0.044  | -0.227 | 0.067     | 0.239     | 0.133  | 0.049     | -0.074 |
| A019186_01 | 0.9       | 0.87   | 0.761  | 1.226     | -0.045    | -0.24  | 0.661     | 0.331  |
| A019187_01 | 0.272     | 0.412  | 0.264  | -0.14     | 0.096     | 0.086  | -0.06     | 0.03   |
| A019188_01 | 0.063     | -0.094 | -0.125 | 0.093     | -0.094    | -0.436 | 0.097     | 0.046  |
| A019192_01 | 0.514     | 0.384  | -0.232 | 0.061     | 0.363     | 0.222  | 0.022     | -0.196 |
| A019196_01 | -0.138    | 0.064  | 0.312  | 0.154     | 0.358     | 0.092  | 0.168     | 0.113  |
| A019200_01 | 0.225     | -0.089 | -0.38  | 0.448     | 0.118     | -0.051 | -0.388    | -0.447 |
| A019206_01 | 0.174     | 0.082  | 0.187  | -0.139    | 0.295     | 0.085  | 0.17      | -0.096 |
| A019211_01 | 0.118     | 0.091  | -0.371 | -0.115    | -0.054    | 0.163  | -0.179    | -0.114 |
| A019213_01 | -1.028    | -0.189 | 0.294  | -0.522    | -0.381    | 0.048  | 0.101     | 0.368  |
| A019216_01 | -0.118    | -0.016 | 0.28   | 0.367     | 0.205     | -0.018 | -0.066    | -0.15  |
| A019229_01 | 0.304     | 0.438  | 0.033  | -0.029    | 0.324     | 0.264  | -0.014    | -0.101 |
| A019231_01 | 0.251     | 0.484  | 0.135  | -0.281    | 0.244     | 0.118  | -0.031 NA |        |
| A019244_01 | 0.025     | 0.039  | -0.026 | 0.112 NA  |           | -0.043 | 0.01      | -0.087 |
| A019247_01 | -0.64     | -0.424 | -0.063 | 0.229     | 0.32      | 0.51   | 0.608     | 0.571  |
| A019249_01 | 0.189     | 0.102  | -0.255 | -0.259    | -0.093    | 0.013  | -0.038    | -0.188 |
| A019252_01 | -0.857    | -0.68  | -0.15  | -0.354    | -0.099    | 0.134  | -0.163    | 0.083  |
| A019253_01 | -0.145    | -0.173 | -0.151 | 0.25      | 0.048     | -0.188 | -0.053    | -0.225 |
| A019255_01 | 0.143     | 0.021  | -0.118 | -0.127    | 0.142     | 0.373  | 0.108     | -0.129 |
| A019261_01 | -0.097    | -0.108 | 0.294  | 0.049     | -0.209    | -0.225 | 0.181     | -0.084 |

|            |        |        |        |        |        |        |        |        |
|------------|--------|--------|--------|--------|--------|--------|--------|--------|
| A019274_01 | -0.351 | -0.362 | -0.35  | 0.225  | NA     | 0.243  | -0.231 | -0.27  |
| A019281_01 | 0.627  | 0.439  | 0.526  | 0.454  | 0.446  | 0.512  | 0.197  | 0.069  |
| A019289_01 | -0.008 | 0.045  | -0.209 | 0.036  | 0.001  | -0.065 | -0.066 | -0.072 |
| A019291_01 | -0.145 | 0.04   | -0.252 | -0.46  | 0.126  | -0.165 | 0.059  | -0.028 |
| A019293_01 | 0.468  | 0.299  | 0.036  | -0.813 | 0.155  | 0.362  | 0.206  | 0.173  |
| A019301_01 | 0.309  | 0.478  | 0.425  | -0.833 | 0.159  | 0.435  | 0.236  | 0.198  |
| A019303_01 | 0.137  | 0.133  | 0.047  | -0.16  | 0.019  | 0      | 0.021  | -0.129 |
| A019305_01 | 0.764  | 0.71   | 0.161  | 0.248  | -0.46  | -0.558 | -0.351 | -0.385 |
| A019308_01 | -0.354 | -0.543 | 0.039  | -0.099 | 0.155  | 0.131  | 0.386  | 0.408  |
| A019312_01 | 0.282  | 0.29   | 0.126  | -0.566 | -0.111 | 0.081  | 0.143  | 0.195  |
| A019318_01 | -0.24  | -0.162 | -0.533 | -0.433 | -0.076 | 0.099  | -0.069 | -0.085 |
| A019324_01 | 0.436  | 0.286  | -0.105 | 0.088  | NA     | -0.301 | -0.451 | -0.405 |
| A019325_01 | -0.342 | -0.415 | 0.103  | 0.173  | -0.317 | -0.378 | 0.446  | 0.39   |
| A019326_01 | 0.026  | 0.027  | -0.183 | 0.014  | -0.346 | -0.26  | -0.119 | NA     |
| A019328_01 | -0.647 | -0.686 | -0.092 | -0.287 | -0.526 | -0.66  | -0.208 | -0.301 |
| A019330_01 | 0.368  | 0.165  | -0.07  | 0.137  | 0.081  | 0.042  | -0.079 | -0.085 |
| A019331_01 | -1.839 | -1.939 | -1.662 | -2.17  | -0.809 | -0.789 | -0.761 | -0.635 |
| A019336_01 | 0.395  | 0.36   | 0.381  | 0.323  | 0.335  | 0.299  | 0.01   | -0.062 |
| A019338_01 | 0.231  | 0.339  | -0.112 | -0.178 | 0.008  | 0.197  | 0.058  | NA     |
| A019340_01 | -0.202 | -0.153 | -0.124 | -0.173 | NA     | -0.05  | -0.209 | -0.032 |
| A019343_01 | -0.279 | -0.356 | 0.007  | -0.128 | 0.042  | 0      | 0.131  | 0.089  |
| A019353_01 | 0.471  | 0.284  | 0.029  | -0.288 | 0.091  | -0.094 | 0.015  | -0.183 |
| A019356_01 | 0.189  | NA     | NA     | -0.426 | 0.591  | 0.607  | -0.272 | NA     |
| A019358_01 | -0.414 | -0.427 | -0.041 | -0.377 | -0.076 | -0.068 | 0.4    | 0.302  |
| A019361_01 | 0.212  | 0.193  | 0.142  | -0.492 | 0.298  | 0.282  | 0.139  | NA     |
| A019367_01 | 0.143  | 0.188  | 0.137  | -0.154 | 0.063  | -0.101 | 0.052  | -0.123 |
| A019372_01 | -0.541 | -0.41  | -0.286 | 0.056  | 0.02   | 0      | 0.006  | -0.052 |
| A019383_01 | -0.376 | -0.428 | -0.058 | -0.699 | -0.092 | 0.057  | 0.165  | 0.098  |
| A019387_01 | 0.303  | 0.3    | 0.252  | 0.417  | 0.062  | 0.13   | -0.042 | -0.13  |
| A019395_01 | -0.24  | -0.416 | -0.762 | -0.828 | 0.007  | -0.294 | -0.656 | -0.571 |
| A019398_01 | 0.575  | 0.685  | 0.382  | 0.222  | -0.018 | 0.187  | 0.287  | 0.176  |
| A019400_01 | 0.77   | 0.684  | 0.138  | 0.346  | 0.004  | 0.131  | -0.193 | -0.221 |
| A019403_01 | 0.297  | 0.139  | 0.005  | -0.518 | 0.256  | 0.228  | 0.078  | NA     |
| A019407_01 | -0.447 | -0.407 | -0.849 | -0.79  | -0.198 | -0.234 | -0.208 | -0.275 |
| A019411_01 | -0.454 | -0.409 | -0.433 | 0.004  | -0.109 | NA     | -0.062 | -0.095 |
| A019414_01 | -0.297 | -0.186 | -0.26  | -0.252 | -0.088 | -0.127 | -0.276 | -0.159 |
| A019419_01 | 0.203  | 0.096  | 0.097  | -0.405 | 0.104  | -0.145 | 0.062  | -0.026 |
| A019423_01 | -0.45  | -0.517 | -0.633 | -0.476 | -0.181 | -0.31  | -0.194 | -0.224 |
| A019424_01 | -0.285 | -0.876 | -0.328 | -0.3   | NA     | NA     | -0.154 | -0.136 |
| A019425_01 | -0.748 | -0.429 | 0.069  | -0.488 | 0.629  | 0.827  | 0.468  | 0.52   |
| A019428_01 | 0.185  | 0.383  | 0.477  | 0.108  | 0.245  | 0.355  | 0.158  | 0.057  |
| A019429_01 | -0.538 | -0.195 | 0.346  | 0.351  | 0.262  | 0.427  | -0.014 | 0.183  |
| A019431_01 | 0.516  | 0.365  | 0.075  | 0.255  | 0.33   | 0.141  | 0.123  | -0.083 |
| A019436_01 | -0.454 | -0.193 | -0.136 | -0.317 | -0.296 | -0.115 | -0.112 | 0.141  |
| A019438_01 | 0.18   | 0.136  | -0.151 | 0.119  | -0.002 | 0.05   | 0.008  | 0.045  |
| A019442_01 | -0.136 | -0.247 | 0.014  | 0.076  | -0.043 | -0.322 | 0.152  | 0.051  |
| A019443_01 | -0.01  | -0.089 | -0.313 | 0.271  | -0.26  | -0.545 | -0.331 | -0.344 |
| A019444_01 | -0.903 | -0.29  | -0.242 | -0.239 | -0.253 | 0.112  | -0.471 | -0.085 |
| A019445_01 | 0.346  | 0.078  | -0.484 | -0.221 | 0      | 0.219  | -0.036 | -0.039 |
| A019447_01 | -0.029 | 0.277  | -0.179 | 0.032  | 0.037  | 0.051  | 0.065  | 0.189  |
| A019451_01 | -2.086 | -1.66  | -0.175 | -0.643 | -0.997 | -0.51  | 0.019  | 0.413  |
| A019456_01 | 0.078  | 0      | 0.106  | -0.25  | -0.119 | -0.101 | -0.039 | -0.111 |
| A019457_01 | -0.238 | 0.034  | -0.195 | -0.585 | -0.135 | 0.148  | -0.323 | -0.09  |
| A019458_01 | -0.723 | -0.544 | 0.051  | 0.046  | -0.353 | -0.475 | -0.124 | -0.119 |
| A019460_01 | -0.09  | 0.022  | -0.331 | -0.581 | 0.109  | 0.207  | -0.022 | -0.049 |
| A019461_01 | 0.441  | 0.429  | 0.423  | 0.503  | 0.266  | 0.387  | -0.126 | -0.112 |
| A019465_01 | 0.288  | -0.076 | -0.223 | 0.021  | 0.115  | NA     | 0.076  | -0.136 |
| A019466_01 | 0.271  | 0.206  | 0.165  | -0.717 | 0.454  | 0.473  | 0.18   | 0.052  |
| A019469_01 | 0.15   | -0.03  | -0.367 | 0.024  | -0.27  | -0.067 | -0.168 | -0.07  |
| A019472_01 | -2.58  | -2.455 | -2.607 | -2.699 | -1.295 | -1.051 | -1.553 | -1.149 |
| A019474_01 | -0.653 | -0.596 | -0.885 | -1.014 | -0.379 | -0.299 | -0.332 | -0.271 |
| A019475_01 | -0.117 | -0.327 | 0.145  | -0.213 | 0.087  | -0.162 | 0.04   | NA     |
| A019480_01 | 0.451  | 0.392  | -0.023 | 0.159  | -0.007 | -0.168 | -0.251 | -0.395 |
| A019485_01 | -0.076 | 0.016  | 0.378  | NA     | 0.316  | 0.367  | 0.092  | NA     |
| A019491_01 | -0.482 | -0.372 | 0.056  | 0.275  | -0.479 | -0.767 | -0.163 | -0.007 |
| A019493_01 | -0.041 | -0.155 | -0.01  | 0.396  | 0.261  | 0.209  | 0.522  | 0.286  |
| A019495_01 | 0.476  | 0.218  | 0.093  | -0.574 | 0.262  | 0.43   | 0.332  | 0.133  |
| A019496_01 | -0.693 | -0.786 | -0.082 | -0.106 | -0.515 | -0.607 | -0.085 | -0.096 |

|            |           |           |           |           |           |        |           |        |
|------------|-----------|-----------|-----------|-----------|-----------|--------|-----------|--------|
| A019497_01 | -0.078    | -0.06     | 0.169     | 0.068     | 0.181     | 0.252  | 0.128 NA  |        |
| A019500_01 | 0.473     | 0.08      | 0.019     | 0.004     | 0.239     | 0.361  | -0.208    | -0.17  |
| A019502_01 | 0.003     | 0.113     | -0.042    | -0.221    | 0.162     | 0.251  | 0.232     | 0.273  |
| A019505_01 | 0.174     | 0.091     | -0.279    | 0.065     | -0.015    | -0.006 | -0.197    | -0.161 |
| A019510_01 | -0.449    | -0.328    | -0.13     | -0.062    | -0.329    | -0.215 | -0.129    | -0.035 |
| A019513_01 | 0.2       | 0.12      | 0.157     | 0.188     | 0.582     | 0.452  | -0.239    | -0.309 |
| A019514_01 | -0.039    | -0.159    | 0.061     | 0.043     | 0.047     | 0.021  | -0.176    | -0.061 |
| A019515_01 | -0.474    | -0.534    | -0.382    | -0.535    | -0.342    | -0.232 | -0.251    | -0.169 |
| A019517_01 | 0.088     | 0.034     | 0.218     | -0.116    | -0.004    | -0.147 | 0.459     | 0.175  |
| A019520_01 | -0.734    | -0.726 NA | NA        |           | -0.383    | -0.364 | -0.833 NA |        |
| A019521_01 | 0.568     | 0.571     | 0.353     | 0.005     | 0.24      | 0.177  | -0.123 NA |        |
| A019524_01 | -0.737    | -0.67     | -0.499 NA |           | -0.316    | -0.542 | -0.725 NA |        |
| A019525_01 | 0.387     | 0.229     | 0.303     | 0.357     | 0.2       | 0.178  | 0.213     | -0.022 |
| A019526_01 | -0.073    | -0.34     | -0.103    | -0.141    | -0.026    | -0.317 | 0.089     | 0.016  |
| A019531_01 | 0.333     | -0.244    | 0.207     | -0.607 NA |           | 0.121  | 0.506     | 0.261  |
| A019532_01 | -0.919    | -1.091    | -0.734 NA |           | -0.799    | -0.52  | -0.163    | 0.033  |
| A019537_01 | -0.447    | -0.579    | -0.066    | -0.073    | -0.288    | -0.277 | -0.301    | -0.267 |
| A019538_01 | 0.391     | 0.481     | -0.099    | 0.257     | -0.381    | -0.603 | -0.07     | -0.022 |
| A019543_01 | -0.602    | -0.704    | -0.526    | -0.263    | 0.207     | 0.127  | 0.732     | 0.603  |
| A019544_01 | 0.492     | 0.478     | 0.475     | 0.415     | 0.553     | 0.62   | 0.37      | 0.258  |
| A019556_01 | -0.083 NA |           | -0.348    | -0.266    | -0.11 NA  |        | 0.261     | 0.14   |
| A019557_01 | -0.167    | -0.24     | -0.335    | -0.033    | -0.177    | -0.17  | -0.125    | -0.046 |
| A019559_01 | -0.502    | -0.518    | -0.473    | -0.548    | -0.207    | -0.404 | -0.346    | -0.511 |
| A019560_01 | -0.453    | -0.498    | -0.436    | -0.597    | -0.003    | -0.074 | -0.333    | -0.184 |
| A019562_01 | -1.686    | -2.038    | -0.71     | -0.54     | -1.705    | -2.6   | -1.886    | -1.415 |
| A019566_01 | -0.14     | -0.069    | -0.801    | 0.025     | -0.209    | -0.239 | -0.505    | -0.323 |
| A019568_01 | -0.535    | -0.243    | 0.165     | 0.164     | -0.052    | -0.188 | 0.009     | 0.082  |
| A019571_01 | -0.171    | -0.153    | 0.299     | -0.094    | -0.06     | -0.176 | 0.072     | 0.11   |
| A019572_01 | -0.292    | -0.55     | -0.265    | -0.455    | -0.05     | -0.362 | 0.137     | 0.046  |
| A019573_01 | -0.106    | -0.136 NA |           | 0.092     | -0.084    | -0.092 | -0.246 NA |        |
| A019575_01 | -0.047    | -0.087    | 0.193     | 0.024     | 0.054     | 0.606  | 0.317     | 0.24   |
| A019576_01 | -0.384 NA |           | -0.623    | -1.057    | -0.177 NA |        | -0.491    | -0.243 |
| A019578_01 | -1.234    | -1.493    | -0.283    | -0.781    | 0.138     | -0.146 | 0.319     | 0.348  |
| A019579_01 | 0.152     | 0.091     | -0.013    | -0.372    | 0.323     | 0.151  | 0.227     | 0.11   |
| A019580_01 | 0.544     | 0.439     | 0.323     | 0.918     | 0.294     | 0.262  | -0.01     | -0.003 |
| A019582_01 | -0.166 NA | NA        |           | -0.013    | 0.295 NA  |        | 0.183     | 0.002  |
| A019583_01 | -0.594    | -0.731    | -0.472    | -0.369    | -0.145    | -0.334 | 0.012     | -0.226 |
| A019584_01 | -0.595    | -0.486    | -0.128    | -0.17     | -0.072    | -0.12  | -0.311    | -0.302 |
| A019585_01 | -0.213    | -0.397    | -0.773    | -0.503    | 0.048     | -0.034 | -0.543    | -0.548 |
| A019587_01 | 0.294     | 0.457     | 0.661     | 1.145     | 0.802     | 0.989  | 0.769     | 0.741  |
| A019589_01 | 0.082     | -0.181    | -0.236    | -0.08     | 0.051     | -0.216 | -0.052    | -0.191 |
| A019590_01 | 0.172     | 0.1       | 0.048     | 0.256     | 0.109     | -0.009 | -0.068    | -0.132 |
| A019591_01 | 0.786     | 0.471     | 0.433     | 0.476     | 0.326     | 0.332  | 0.458     | 0.29   |
| A019592_01 | -0.327    | -0.146 NA | NA        |           | -0.113    | -0.079 | -0.125 NA |        |
| A019597_01 | 0.238     | 0.29      | -0.111    | -0.015    | -0.015    | 0.175  | 0.005     | -0.082 |
| A019602_01 | -0.312    | -0.132    | 0.16      | 0.71      | -0.377    | -0.522 | -0.457    | -0.323 |
| A019604_01 | 0.755     | 0.588     | -0.171    | 0.286     | -0.197    | 0.27   | -0.103    | -0.055 |
| A019606_01 | -0.745    | -0.714    | -0.362    | 0.119     | -0.309    | -0.32  | -0.485    | -0.567 |
| A019608_01 | 0.528     | 0.837     | 1.079     | 1.196     | 1.051     | 1.238  | 0.621     | 0.898  |
| A019609_01 | 0.372     | 0.197     | -0.361    | -0.26     | 0.217     | 0.312  | 0.02      | 0.018  |
| A019611_01 | 1.045     | 1.072     | 0.674     | 1.108     | 0.427     | 0.78   | 0.198     | 0.161  |
| A019612_01 | -0.29     | -0.423    | -0.605    | -0.268    | -0.006    | -0.067 | -0.199    | -0.232 |
| A019614_01 | 0.083     | 0.014     | 0.289     | 0.138     | -0.082    | -0.26  | 0.033     | -0.083 |
| A019615_01 | 0.206     | 0.068     | 0.101     | -0.001    | 0.042     | -0.273 | 0.019 NA  |        |
| A019617_01 | 0.606     | 0.582     | -0.035    | 0.154     | 0.076     | 0.214  | 0.193     | -0.006 |
| A019618_01 | -0.393 NA |           | -0.305    | -0.093    | -0.069 NA |        | 0.2       | 0.058  |
| A019619_01 | 0.077     | 0.051     | 0.251     | -0.227    | 0.144     | 0.139  | 0.026     | -0.1   |
| A019621_01 | 0.286     | 0.247     | 0.048     | 0.002     | 0.129     | -0.016 | 0.027     | -0.307 |
| A019625_01 | 0.749     | 0.648     | 0.664     | 0.159     | 0.42      | 0.551  | 0.346     | 0.364  |
| A019626_01 | 0.548     | 0.388     | 0.268     | 0.02      | 0.091     | 0.465  | 0.247     | 0.136  |
| A019630_01 | 0.211     | -0.233    | -0.167    | 0.177     | 0.04      | -0.449 | -0.13     | -0.38  |
| A019632_01 | -0.148    | -0.135    | 0.008 NA  |           | -0.055    | -0.169 | -0.223 NA |        |
| A019633_01 | -0.642    | -0.953 NA | NA        |           | -0.297    | -0.714 | -0.391 NA |        |
| A019635_01 | 0.257     | 0.319     | -0.18     | -0.047    | 0.282     | 0.237  | -0.028    | -0.145 |
| A019636_01 | -1.218    | -0.376    | 0.108     | -0.307    | -0.418    | -0.026 | -0.194    | 0.295  |
| A019638_01 | -0.417    | -0.364    | -0.179    | 0.078     | -0.336    | -0.235 | -0.229    | 0.009  |
| A019640_01 | -0.049    | -0.089    | 0.291     | 0.224     | -0.448    | -0.601 | 0.092 NA  |        |
| A019641_01 | 0.434     | 0.048     | -0.065    | 0.057     | -0.069    | -0.408 | -0.314    | -0.341 |

|            |           |          |           |           |           |        |           |        |
|------------|-----------|----------|-----------|-----------|-----------|--------|-----------|--------|
| A019642_01 | -1.655 NA |          | -0.57     | -0.417    | -1.378 NA |        | -0.302    | -0.313 |
| A019645_01 | -0.363    | -0.386   | -0.127    | 0.059     | -0.139    | -0.161 | 0.023     | 0.01   |
| A019649_01 | -0.193    | -0.21    | -0.379    | 0.138     | -0.142    | -0.269 | -0.301    | -0.207 |
| A019650_01 | -0.67     | -1.795   | -0.993    | -0.839    | 0.059     | -0.106 | -0.01     | 0.017  |
| A019654_01 | -0.565    | -0.652   | -0.362    | 0.008     | -0.249    | -0.38  | -0.041    | -0.062 |
| A019655_01 | 0.305 NA  |          | -0.225    | -0.709 NA | NA        |        | -0.111    | -0.16  |
| A019659_01 | 0.231     | 0.087    | 0.37      | 0.26      | 0.605     | 0.474  | 0.187 NA  |        |
| A019662_01 | 0.105     | 0.262    | -0.07     | 0.045     | 0.032     | -0.004 | -0.164    | -0.13  |
| A019663_01 | -0.928    | -1.392   | -0.398    | -0.287    | -0.29     | -0.489 | -0.053    | -0.134 |
| A019666_01 | -0.555    | -0.709   | 0.058     | -0.194    | -0.678    | -1.129 | 0.069     | 0.07   |
| A019668_01 | -0.186    | -0.052   | -0.77     | -0.554    | 0.463     | 0.737  | 0.124     | 0.153  |
| A019672_01 | -0.517    | -0.448   | -0.143    | -0.306    | -0.453    | -0.655 | -0.358    | -0.407 |
| A019674_01 | 0.076     | 0.036    | -0.04     | -0.31     | 0.043     | 0.001  | -0.108    | -0.147 |
| A019675_01 | -0.243    | -0.404   | -0.23     | -0.281    | 0.021     | -0.086 | 0.077     | -0.015 |
| A019677_01 | -0.309    | -0.26    | 0.263     | 0.115     | -0.079    | -0.151 | 0.061     | -0.089 |
| A019678_01 | -0.891    | -0.485   | 1.036     | 1.475     | 1.455     | 1.56   | 0.632     | 1.033  |
| A019679_01 | -0.178    | -0.53    | -0.203    | -0.269    | -0.003    | -0.323 | -0.142    | -0.532 |
| A019680_01 | -1.437    | -1.361   | -0.394    | 0.142     | -2.007    | -2.346 | -0.661    | -0.462 |
| A019681_01 | -0.084    | -0.067   | 0.306     | 0.156     | 0.19      | 0.173  | 0.005     | 0.016  |
| A019683_01 | 0.306     | 0.142    | 0.146     | 0.256     | 0.091     | -0.168 | -0.101    | -0.209 |
| A019684_01 | -0.278    | -0.269   | -0.03     | 0.012     | 0.075     | 0.064  | 0.048     | -0.006 |
| A019686_01 | -0.714    | -1.373   | -0.468    | -0.716    | 0.073     | -0.453 | 0.064     | -0.145 |
| A019691_01 | -0.124 NA |          | -0.066    | 0.222     | -0.087 NA |        | -0.051    | 0.046  |
| A019692_01 | -2.557    | -2.716   | -1.462    | -1.037    | -1.955    | -1.968 | -0.951    | -0.638 |
| A019695_01 | 0.522     | 0.533    | 0.391     | -0.368    | 0.392     | 0.42   | 0.151     | -0.008 |
| A019698_01 | -1.054    | -1.057   | -0.579    | -0.62     | -0.285    | -0.057 | -0.265    | -0.124 |
| A019699_01 | 0.066     | -0.081   | -0.181    | -0.289    | 0.001     | -0.134 | -0.073 NA |        |
| A019707_01 | 0.59      | 0.339    | 0.198     | -0.026 NA | NA        |        | 0.035     | -0.278 |
| A019710_01 | 0.795     | 0.674    | -0.069    | 0.323     | 0.13      | 0.386  | -0.167    | -0.137 |
| A019712_01 | -0.027    | 0.083    | -0.3      | -0.324    | -0.115    | -0.061 | -0.097    | -0.179 |
| A019713_01 | 0.28      | 0.162    | 0.057     | -0.453    | -0.059    | 0.149  | -0.15     | -0.123 |
| A019714_01 | -0.286    | -0.133   | -0.221    | -0.208    | -0.221    | -0.161 | -0.459    | -0.31  |
| A019718_01 | 0.204     | -0.034   | 0.312     | 0.769     | -0.001    | -0.237 | 0.033     | -0.158 |
| A019719_01 | 0.106     | -0.158   | -0.361    | -0.16     | 0.028     | 0.112  | -0.09     | -0.032 |
| A019724_01 | -0.395    | -0.58    | -0.149    | -0.066    | 0.443     | 0.433  | 0.547     | 0.465  |
| A019725_01 | 0.424     | 0.442    | 0.452     | 0.708     | 0.714     | 0.716  | 0.564     | 0.459  |
| A019726_01 | -0.055    | 0.096    | -0.322 NA |           | 0.163     | 0.129  | 0.535     | 0.21   |
| A019730_01 | -0.239    | 0.374 NA |           | 0.436     | -0.002    | 0.039  | 0.461     | 0.307  |
| A019732_01 | -0.515    | -0.289   | 0.169     | -0.026    | -0.194    | -0.075 | -0.028    | 0.004  |
| A019733_01 | -0.579    | -0.417   | -0.016    | 0.149     | -0.089    | -0.285 | -0.021    | 0.171  |
| A019734_01 | 0.7       | 0.488    | 0.358     | 0.322     | 0.456     | 0.389  | 0.586     | 0.166  |
| A019738_01 | 0.422     | 0.318    | -0.096    | 0.171     | 0.195     | 0.325  | -0.026    | -0.006 |
| A019741_01 | 0.316     | 0.544    | 0.481     | 0.725     | -0.014    | -0.106 | -0.035    | 0.087  |
| A019744_01 | -0.084    | -0.21    | -0.139    | 0.155     | 0.039     | -0.297 | -0.019    | 0.026  |
| A019745_01 | 0.625 NA  |          | 0.474     | 0.818     | 0.149 NA  |        | -0.735    | -0.625 |
| A019748_01 | 0.43      | 0.471    | 0.674     | 0.173     | -0.817    | -0.704 | 0.45      | 0.499  |
| A019749_01 | 0.028     | -0.141   | -0.111    | 0.191     | 0.12      | -0.102 | 0.012     | -0.094 |
| A019750_01 | 0.188     | 0.126    | 0.222     | 0.335     | 0.017 NA  |        | 0.074 NA  |        |
| A019751_01 | -0.177    | 0.014    | -0.093    | -0.27     | 0.02      | 0.295  | -0.142    | -0.103 |
| A019754_01 | -0.134    | -0.088   | 0.272     | -0.267    | 0.208     | 0.2    | 0.099     | -0.044 |
| A019755_01 | -0.767    | -0.975   | 0.373     | 0.437     | -0.919    | -1.349 | 0.201     | 0.092  |
| A019756_01 | -0.325    | 0.015    | 0.085     | 0.287     | -0.187    | -0.077 | -0.198    | -0.088 |
| A019758_01 | -2.947    | -3.259   | -2.85     | -3.237    | -1.944    | -2.178 | -0.906    | -0.752 |
| A019761_01 | -0.098    | -0.101   | 0.52      | 0.359     | -0.125    | -0.353 | 0.738     | 0.698  |
| A019763_01 | 0.498     | 0.413    | 0.108     | 0.093     | 0.048     | 0.177  | 0.451     | 0.319  |
| A019766_01 | -0.328    | -0.097   | -0.286    | 0.312     | -0.276    | -0.28  | -0.231    | 0.083  |
| A019768_01 | 0.636     | 0.743    | 0.252     | -0.372    | 0.086     | 0.233  | 0.001     | -0.019 |
| A019771_01 | -0.29     | -0.374   | 0.251     | 0.133     | -0.777    | -0.877 | 0.039     | -0.03  |
| A019774_01 | -0.029    | -0.09    | -0.104    | 0.212     | -0.349    | -0.475 | -0.168    | -0.266 |
| A019779_01 | 0.492     | 0.137    | 0.704     | 0.703     | 0.381 NA  |        | 0.264     | -0.138 |
| A019781_01 | -0.421    | -0.821   | -0.687    | -1.126    | -0.37     | -0.892 | 0.037     | -0.149 |
| A019783_01 | -0.079    | -0.268   | 0.372     | 0.057     | 0.183     | -0.115 | 0.125     | -0.027 |
| A019785_01 | -0.858    | -1.173   | -0.963    | -1.051    | -0.011 NA |        | -0.166    | -0.229 |
| A019791_01 | -0.015    | 0.057    | -0.541    | -0.341    | 0.351     | 0.321  | 0.219     | 0.081  |
| A019793_01 | -0.172    | -0.499   | -0.111    | 0.238     | -0.271    | -0.322 | -0.095    | -0.105 |
| A019794_01 | 0.06      | 0.049    | -0.053    | -0.319    | 0.335     | 0.4    | 0.152     | 0.102  |
| A019796_01 | 0.054     | -0.058   | 0.185     | 0.075     | 0.001     | 0.077  | 0.115     | -0.026 |
| A019797_01 | 0.274 NA  |          | 0.07      | -0.223    | 0.109 NA  |        | 0.266     | 0.325  |



|            |           |        |           |        |           |        |           |        |
|------------|-----------|--------|-----------|--------|-----------|--------|-----------|--------|
| A019799_01 | -0.134 NA |        | -0.28     | 0.182  | 0.012 NA  |        | 0.127     | -0.028 |
| A019801_01 | 0.131     | 0.173  | -0.004    | -0.055 | -0.106    | 0.186  | -0.064    | 0.119  |
| A019805_01 | 0.254     | 0.132  | -0.532    | 0.097  | -0.21     | -0.014 | -0.146    | -0.144 |
| A019806_01 | -0.494    | -0.239 | -0.063    | 0.093  | -0.07     | 0      | 0.02      | 0.031  |
| A019810_01 | -0.159    | -0.45  | -0.675    | -0.391 | 0.026     | 0.07   | -0.293    | -0.244 |
| A019812_01 | -0.134    | -0.207 | -0.629    | -0.775 | 0.043     | 0.38   | -0.266    | -0.089 |
| A019813_01 | -0.367    | -0.37  | -0.514    | 0.446  | -0.263    | -0.683 | -0.352 NA |        |
| A019815_01 | 0.043     | -0.189 | 0.064     | -0.387 | 0.153     | 0.014  | 0.123     | -0.03  |
| A019818_01 | 0.511     | 0.714  | 0.352     | 0.555  | -0.137    | -0.162 | 0.407     | 0.365  |
| A019820_01 | 0.26      | -0.102 | -0.352    | 0.226  | -0.093    | -0.329 | -0.036    | -0.139 |
| A019822_01 | -0.003    | -0.005 | -0.095    | -0.239 | 0.252     | 0.416  | 0.203     | 0.098  |
| A019823_01 | -0.45     | -0.257 | -0.105    | 0.067  | -0.26     | 0.042  | -0.204    | -0.086 |
| A019826_01 | 0.118     | 0.251  | 0.301     | -0.139 | 0.07      | 0.105  | 0.363     | 0.249  |
| A019828_01 | 0.189     | 0.121  | 0.209     | 0.706  | -0.064    | -0.307 | -0.156    | -0.334 |
| A019829_01 | -0.162    | 0.141  | -0.033    | 0.281  | -0.007    | 0.254  | -0.052    | 0.088  |
| A019830_01 | 0.098     | -0.038 | 0.234     | 0.323  | -0.092    | -0.094 | -0.011    | -0.284 |
| A019831_01 | -0.495    | -0.472 | -0.333    | -0.663 | 0.039     | 0.01   | -0.135 NA |        |
| A019834_01 | 0.323     | -0.112 | -0.003    | 0.121  | -0.354    | -0.595 | -0.279    | -0.242 |
| A019840_01 | 0.33      | 0.33   | 0.006     | 0.417  | -0.383    | -0.372 | -0.242    | -0.273 |
| A019842_01 | 0.463     | 0.639  | -0.099    | 0.216  | 0.111 NA  |        | -0.078 NA |        |
| A019843_01 | -0.691    | -0.602 | -1.011    | -0.589 | -1.192    | -1.451 | 0.111     | 0.101  |
| A019846_01 | -0.23     | 0.105  | 0.74      | 0.374  | 0.299     | 0.054  | 0.142     | 0.142  |
| A019848_01 | -0.535    | -0.347 | -0.184    | -0.434 | -0.091    | -0.192 | -0.043    | -0.196 |
| A019851_01 | -0.72     | -0.632 | 0.153     | -0.304 | 0.101     | -0.07  | 0.566     | 0.282  |
| A019854_01 | -0.319    | 0.226  | 0.943     | 0.454  | 0.064     | 0.323  | 0.496     | 0.522  |
| A019855_01 | 0.638     | 0.738  | 0.724     | 1.005  | 0.516     | 0.57   | 0.552     | 0.449  |
| A019857_01 | -0.128    | -0.334 | -0.143    | 0.199  | 0.033     | -0.168 | -0.18     | -0.265 |
| A019858_01 | -0.052    | -0.079 | 0.348     | 0.399  | -0.188    | -0.195 | 0.299     | 0.517  |
| A019861_01 | -1.128    | -1.018 | -0.804    | -0.319 | -0.959    | -1.047 | -0.499    | -0.225 |
| A019865_01 | -0.027    | -0.145 | -0.37     | -0.799 | 0.201     | 0.194  | 0.085 NA  |        |
| A019866_01 | -0.843    | -0.476 | 0.08      | 0.104  | -0.893    | -1.014 | -0.293 NA |        |
| A019870_01 | -0.007    | 0.01   | 0.031     | -0.33  | 0.078     | 0.11   | 0.081     | 0.101  |
| A019872_01 | 0.401     | 0.327  | 0.299     | 0.362  | 0.175     | 0.247  | 0.26 NA   |        |
| A019874_01 | -0.654    | -0.456 | 0.239     | 0.111  | 0.229     | 0.326  | -0.665    | -0.416 |
| A019876_01 | 0.235     | 0.154  | -0.057    | -0.216 | 0.071     | 0.217  | 0.052     | -0.122 |
| A019877_01 | 0.386     | 0.23   | 0.095     | 0.269  | -0.016    | 0.159  | 0.031     | 0.042  |
| A019880_01 | -0.561    | -0.313 | -0.431    | -0.742 | -0.221    | -0.046 | -0.081    | -0.076 |
| A019882_01 | 0.321     | 0.278  | -0.583    | 0.31   | -0.244    | -0.343 | -0.568    | -0.411 |
| A019885_01 | 0.211     | 0.162  | -0.479    | 0.443  | -0.001    | -0.085 | -0.389    | -0.177 |
| A019886_01 | 0.189     | -0.007 | -0.764    | -0.316 | 0.151     | 0.263  | 0.063     | 0.085  |
| A019887_01 | 0.264     | 0.244  | -0.225    | 0.2    | -0.399    | -0.374 | -0.323    | -0.174 |
| A019891_01 | 0.461 NA  |        | -0.162    | -0.146 | 0.033 NA  |        | -0.14     | -0.203 |
| A019892_01 | -0.459    | -0.583 | -0.394    | -0.625 | -0.669    | -0.606 | 0.214     | 0.155  |
| A019893_01 | -2.089    | -2.193 | -0.693    | -0.936 | -0.473    | -0.486 | 0.045     | 0.023  |
| A019894_01 | 0.226     | 0.487  | 0         | -0.109 | -0.16     | 0.243  | -0.113    | 0.269  |
| A019895_01 | 0.921     | 0.762  | 0.688     | 1.143  | 0.903     | 0.841  | -0.411    | -0.407 |
| A019897_01 | -0.086 NA |        | 0.245     | 0.44   | 0.022 NA  |        | 0.002     | -0.016 |
| A019898_01 | -0.16     | 0.119  | -0.198    | -0.244 | -0.294    | -0.083 | -0.02     | 0.037  |
| A019899_01 | 0.194     | 0.304  | -0.094    | 0.048  | 0.033     | 0.048  | -0.005    | -0.063 |
| A019900_01 | 0.099     | 0.158  | 0.085     | -0.084 | 0.225     | 0.257  | 0.074     | -0.032 |
| A019901_01 | 0.458     | 0.466  | 0.16      | -0.374 | 0.093     | 0.256  | 0.01      | 0.049  |
| A019904_01 | 0.144     | 0.011  | -0.281    | -0.271 | -0.008    | -0.082 | -0.225    | -0.306 |
| A019905_01 | -0.025    | 0.157  | -0.545    | -0.041 | -0.015    | -0.004 | -0.164    | 0.01   |
| A019916_01 | 0.14      | 0.374  | 0.443     | 0.148  | 0.263     | 0.316  | 0.26      | 0.438  |
| A019918_01 | -0.13     | -0.31  | -0.407    | 0.469  | -0.053    | -0.212 | -0.069 NA |        |
| A019919_01 | -0.132    | -0.012 | -0.542 NA |        | 0.741     | 0.89   | 0.39 NA   |        |
| A019923_01 | -0.353    | -0.59  | -0.687    | -0.218 | -0.124    | -0.041 | 0.058     | -0.085 |
| A019926_01 | -0.184    | -0.556 | 0.014     | -0.273 | 0.204     | 0.126  | -0.124 NA |        |
| A019927_01 | 0.165 NA  |        | 0.037 NA  |        | 0.07 NA   |        | 0.163 NA  |        |
| A019929_01 | -0.108    | -0.119 | 0.094     | 0.101  | -0.241    | -0.244 | -0.077    | -0.239 |
| A019934_01 | 0.219     | 0.549  | 0.561 NA  |        | 0.008     | 0.212  | 0.287     | 0.397  |
| A019935_01 | -0.078    | -0.09  | -0.032    | 0.283  | -0.089    | -0.049 | -0.18     | -0.239 |
| A019936_01 | 0.16      | -0.038 | -0.184    | -0.143 | -0.158    | -0.162 | 0.002     | -0.017 |
| A019940_01 | -0.749    | -0.573 | -0.398    | -0.333 | -0.282    | -0.198 | 0.23      | 0.212  |
| A019941_01 | 0.356     | 0.347  | 0.507     | 0.359  | 0.235     | 0.295  | 0.417     | 0.27   |
| A019942_01 | -1.223    | -0.918 | -0.915    | -0.875 | -0.699    | -0.682 | -0.157    | -0.137 |
| A019943_01 | 0.174 NA  |        | 0.368     | 0.17   | -0.258 NA |        | 0.2       | -0.168 |
| A019944_01 | 0.718     | 0.456  | 0.335     | 0.391  | 0.138     | 0.402  | 0.297 NA  |        |

|            |           |        |        |        |           |        |           |        |
|------------|-----------|--------|--------|--------|-----------|--------|-----------|--------|
| A019946_01 | 0.609     | 0.609  | 0.268  | -0.195 | 0.285     | 0.39   | 0.256     | -0.013 |
| A019947_01 | 0.106     | 0.061  | 0.064  | 0.319  | 0.14      | -0.094 | 0.026     | -0.14  |
| A019949_01 | -0.404    | -0.116 | 0.148  | -0.107 | -0.416    | -0.18  | 0.075     | 0.294  |
| A019952_01 | -0.283    | -0.38  | -0.369 | -0.24  | -0.082    | -0.19  | -0.063    | -0.101 |
| A019953_01 | -0.727    | 0.128  | 0.283  | -0.08  | -0.499    | 0.058  | -0.107    | 0.604  |
| A019954_01 | 0.058     | -0.056 | -0.383 | -0.054 | 0.487     | 0.342  | 0.121     | -0.102 |
| A019957_01 | 0.414     | 0.516  | 0.343  | 0.695  | 0.56      | 0.557  | -0.171    | -0.085 |
| A019958_01 | -0.007    | -0.217 | -0.145 | -0.007 | 0.107     | -0.167 | 0.02      | -0.141 |
| A019964_01 | -1.548    | -1.647 | -0.537 | -0.543 | -0.581    | -0.545 | 0.085     | 0.222  |
| A019965_01 | 0.126     | 0.145  | -0.261 | 0.037  | -0.126    | -0.05  | -0.27     | 0.06   |
| A019968_01 | -0.231    | -0.223 | -0.299 | -0.062 | -0.111    | -0.254 | -0.15     | -0.068 |
| A019969_01 | -0.239    | -0.154 | -0.209 | -0.098 | -0.029    | -0.123 | -0.05     | -0.094 |
| A019970_01 | -0.327    | -0.197 | -0.239 | 0.182  | -0.325    | -0.341 | -0.453    | -0.246 |
| A019971_01 | -0.88     | -0.468 | -0.5   | -0.706 | -0.5      | -0.121 | -0.768    | -0.197 |
| A019972_01 | 0.374     | 0.324  | 0.092  | 0.046  | 0.073     | 0.105  | 0.132     | -0.051 |
| A019973_01 | 0.003     | -0.371 | -0.305 | 0.228  | -0.033    | -0.175 | -0.18     | -0.099 |
| A019975_01 | -0.665    | -0.647 | -0.56  | -0.613 | -0.365    | -0.396 | -0.173    | -0.081 |
| A019976_01 | -2.354    | -2.61  | -1.535 | -1.869 | -1.78     | -2.149 | -0.556    | -0.289 |
| A019977_01 | -0.378    | -0.389 | 0.04   | -0.008 | 0.055     | -0.178 | -0.054    | 0.078  |
| A019978_01 | 0.538     | 0.374  | 0.413  | -0.227 | 0.38      | 0.585  | 0.182 NA  |        |
| A019982_01 | 0.481     | 0.451  | -0.268 | 0.159  | -0.029    | 0.025  | -0.071    | -0.034 |
| A019983_01 | -0.104    | -0.059 | 0.101  | 0.256  | 0         | -0.101 | -0.054    | -0.007 |
| A019985_01 | -0.139    | -0.152 | -0.368 | -0.06  | -0.102    | -0.071 | -0.018    | -0.169 |
| A019987_01 | 0.019     | -0.045 | -0.33  | 0.2    | 0.237 NA  |        | -0.3      | 0.061  |
| A019991_01 | 0.022     | 0.048  | -0.023 | 0.348  | -0.309    | -0.363 | -0.194    | -0.25  |
| A019995_01 | 0.274     | -0.718 | -0.58  | -0.85  | 0.213     | 0.075  | -0.209    | -0.198 |
| A019997_01 | -0.364    | -0.049 | 0.169  | 0.332  | 0.145     | 0.117  | -0.001    | 0.01   |
| A020001_01 | -0.196    | 0.191  | 0.082  | -0.058 | -0.502    | -0.52  | -0.472    | -0.086 |
| A020005_01 | -0.041    | -0.178 | -0.069 | -0.249 | 0.296     | 0.554  | 0.684     | 0.401  |
| A020008_01 | -1.358    | -1.23  | -0.732 | -1.066 | -1.087    | -1.271 | -0.642 NA |        |
| A020009_01 | -0.242    | -0.365 | 0.119  | -0.12  | 0.042     | -0.118 | -0.085    | -0.151 |
| A020012_01 | -0.081    | 0.042  | 0.702  | 0.889  | -0.506    | -0.614 | -0.908 NA |        |
| A020014_01 | -0.167    | -0.173 | -0.104 | 0.254  | -0.461    | -0.814 | 0.111     | 0.091  |
| A020016_01 | -0.076    | 0.355  | 0.394  | 0.837  | -0.121    | -0.083 | -0.137    | 0.084  |
| A020017_01 | -0.951    | -1.29  | 0.375  | 0.267  | 0.892     | 0.92   | 0.422     | 0.226  |
| A020022_01 | -1.093 NA |        | -1.008 | -0.927 | -0.537 NA |        | -0.492    | -0.624 |
| A020023_01 | 0.22      | 0.061  | -0.108 | -0.034 | 0.102     | 0.226  | -0.097    | -0.117 |
| A020025_01 | 0.134     | 0.036  | -0.089 | 0.185  | 0.12      | -0.036 | -0.031    | -0.194 |
| A020031_01 | 0.689     | 0.579  | -0.006 | -0.424 | -0.188    | -0.116 | -0.181    | -0.18  |
| A020033_01 | -0.985    | -1.213 | -0.649 | -1.166 | -0.37     | -0.388 | -0.204    | -0.029 |
| A020035_01 | 0.037     | 0.066  | 0.882  | 0.964  | 0.144     | 0.052  | 0.73      | 0.631  |
| A020036_01 | 0.453     | 0.249  | -0.065 | -0.711 | 0.283     | 0.461  | 0.034     | 0.048  |
| A020037_01 | 0.149     | 0.084  | -0.018 | 0.199  | 0.127     | 0.242  | 0.035     | 0.075  |
| A020039_01 | 0.191     | 0.143  | 0.63   | 0.335  | -0.234    | -0.796 | 0.089 NA  |        |
| A020041_01 | -0.097    | -0.035 | -0.038 | 0.476  | -0.137 NA |        | 0.249     | 0.148  |
| A020042_01 | -0.234    | -0.267 | -0.388 | -0.565 | 0.002     | -0.245 | -0.192 NA |        |
| A020043_01 | 0.28      | -0.025 | -0.439 | 0.013  | 0.201     | 0.179  | 0.095     | -0.273 |
| A020045_01 | -0.474    | -0.303 | -0.382 | 0.249  | 0.127     | 0.29   | -0.573    | -0.489 |
| A020046_01 | -0.252    | -0.52  | -0.917 | -0.029 | -0.021    | -0.051 | -0.319    | -0.274 |
| A020047_01 | -0.037    | -0.077 | 0.018  | 0.042  | -0.015    | -0.146 | -0.039    | -0.077 |
| A020048_01 | -0.179    | -0.267 | -0.077 | -0.211 | -0.358    | -0.411 | -0.105    | -0.221 |
| A020050_01 | -0.943    | -1.222 | -0.482 | 0.311  | -1.117 NA |        | -0.59 NA  |        |
| A020053_01 | -0.503    | -0.634 | 0.258  | -0.058 | -0.085    | -0.06  | 0.141     | 0.003  |
| A020054_01 | -0.16     | -0.226 | -0.375 | -0.056 | -0.13     | -0.149 | -0.099    | 0.007  |
| A020055_01 | -0.103    | 0.092  | 0      | 0.277  | -0.138    | -0.28  | -0.127    | 0.011  |
| A020056_01 | -0.785    | -0.444 | -0.283 | -0.02  | -0.28     | -0.108 | -0.256    | -0.173 |
| A020060_01 | 0.599     | 0.46   | -0.086 | -0.328 | 0.414     | 0.381  | 0.039     | -0.141 |
| A020061_01 | -0.351    | -0.298 | -0.572 | -0.215 | 0.29      | 0.415  | -0.33     | -0.192 |
| A020062_01 | -0.756    | -0.169 | -0.281 | -0.254 | -0.131    | 0.183  | -0.218    | 0.177  |
| A020064_01 | -0.189    | -0.51  | -0.075 | -0.139 | 0.369     | 0.262  | 0.682     | 0.497  |
| A020065_01 | -0.421    | -0.511 | -0.973 | -1.596 | 0.229     | 0.5    | -0.287    | -0.363 |
| A020068_01 | -1.352    | -0.837 | 0.634  | 0.729  | 0.366     | 0.756  | 0.457     | 0.604  |
| A020070_01 | 0.503     | 0.577  | 1.299  | 1.504  | 0.563     | 0.597  | 0.318     | 0.271  |
| A020071_01 | -0.08     | 0.48   | 0.421  | 0.61   | -0.075    | 0.08   | -0.636    | -0.032 |
| A020072_01 | 0.235     | 0.1    | 0.337  | 0.041  | 0.145     | -0.01  | 0.213     | 0.194  |
| A020073_01 | -0.048    | -0.176 | -0.188 | -0.68  | -0.025    | -0.19  | 0.038     | -0.18  |
| A020074_01 | 0.522     | 0.222  | 0.21   | 0.253  | -0.088    | -0.186 | 0.202     | 0.131  |
| A020075_01 | 0.432     | 0.162  | -0.218 | 0.086  | 0.068     | 0.352  | 0.098     | 0.12   |

|            |           |        |           |        |          |        |           |        |
|------------|-----------|--------|-----------|--------|----------|--------|-----------|--------|
| A020076_01 | 0.475     | 0.738  | 0.555     | 0.825  | 0.349    | 0.755  | 0.26      | 0.368  |
| A020077_01 | -0.368    | -0.418 | -0.096    | 0.024  | -0.042   | -0.312 | -0.298    | -0.015 |
| A020078_01 | 0.069     | -0.134 | -0.23     | 0.375  | -0.053   | -0.133 | -0.301 NA |        |
| A020082_01 | -0.13     | -0.176 | -0.186    | -0.153 | 0.354    | 0.3    | 0.059     | -0.042 |
| A020083_01 | -0.667    | -0.32  | -0.478    | -0.169 | -0.189   | -0.242 | -0.24     | -0.009 |
| A020086_01 | 0.124     | 0.077  | -0.192    | 0.255  | -0.146   | 0.026  | -0.19     | -0.061 |
| A020089_01 | -0.206    | -0.331 | -0.174    | -0.356 | -0.043   | -0.168 | -0.319    | -0.322 |
| A020090_01 | -0.049    | -0.198 | 0.139     | -0.173 | 0.129    | -0.201 | -0.006    | -0.009 |
| A020091_01 | -0.455    | -0.251 | -0.229    | 0.035  | -0.245   | 0.023  | -0.228    | -0.136 |
| A020092_01 | -0.544    | -0.119 | 0.074     | 0.257  | -0.236   | -0.071 | -0.266    | 0.017  |
| A020098_01 | 0.073     | 0.159  | -0.462    | -0.345 | 0.116    | 0.086  | -0.15     | -0.291 |
| A020099_01 | 0.245     | 0.327  | -0.01     | 0.149  | -0.227   | 0.118  | -0.03     | -0.028 |
| A020100_01 | -0.022    | -0.148 | -0.037    | 0.211  | 0.023    | 0.002  | -0.086    | -0.163 |
| A020101_01 | -0.178    | -0.258 | -0.337    | -0.074 | -0.234   | -0.302 | -0.29     | -0.238 |
| A020102_01 | 0.278     | 0.35   | 0.138     | 0.203  | -0.241   | -0.246 | -0.092    | 0.02   |
| A020103_01 | -0.692    | -0.561 | -0.234    | -0.484 | -0.467   | -0.633 | -0.337    | -0.227 |
| A020104_01 | -0.116    | -0.203 | -0.04     | 0.3    | -0.166   | -0.083 | 0.282     | 0.136  |
| A020105_01 | -0.713    | -0.531 | -0.269    | -0.379 | -0.464   | -0.399 | -0.314    | -0.114 |
| A020107_01 | 0.194     | 0.264  | 0.323     | 0.654  | -0.333   | -0.173 | -0.17     | -0.005 |
| A020109_01 | 0.22      | 0.428  | 0.118     | 0.525  | 0.121    | 0.521  | 0.095     | 0.17   |
| A020116_01 | -0.551    | -0.505 | -0.209    | -0.555 | 0.123    | 0.018  | -0.178    | -0.027 |
| A020119_01 | -0.326    | -0.506 | 0.221     | -0.378 | 0.193    | -0.141 | 0.049     | -0.022 |
| A020120_01 | -0.087    | -0.001 | -0.122    | -0.137 | -0.081   | -0.168 | -0.101    | 0.012  |
| A020121_01 | -0.669    | -0.596 | -0.438    | -0.5   | -0.221   | -0.102 | -0.287    | -0.279 |
| A020122_01 | 0.241     | 0.148  | -0.136    | -0.06  | 0.083    | 0.371  | 0.131     | 0.261  |
| A020123_01 | 0.059     | 0.02   | -0.224    | 0.062  | -0.159   | 0.163  | 0.058     | 0.031  |
| A020125_01 | -0.415    | -0.266 | -0.066    | 0.167  | -0.171   | -0.201 | -0.235    | 0.032  |
| A020126_01 | -0.423    | -0.236 | -0.147    | -0.008 | -0.224   | 0.058  | -0.067    | -0.048 |
| A020128_01 | -0.147    | -0.134 | 0.026     | 0.066  | 0.052    | 0.025  | -0.01     | -0.04  |
| A020130_01 | 0.196     | 0.101  | 0.177 NA  |        | 0.137    | 0.136  | 0.069 NA  |        |
| A020132_01 | 0.143     | 0.19   | -0.16     | 0.098  | 0.023    | -0.022 | -0.071    | -0.203 |
| A020134_01 | 0.145     | 0.138  | 0.108     | 0.097  | 0.031    | -0.011 | 0.048     | -0.004 |
| A020135_01 | -0.405    | -0.393 | -0.261    | -0.319 | -0.118   | -0.377 | -0.031    | -0.15  |
| A020140_01 | 0.176     | 0.193  | 0.324     | 0.513  | -0.155   | -0.058 | -0.304    | -0.181 |
| A020141_01 | -0.205    | -0.149 | 0.193     | -0.108 | 0.126    | -0.03  | 0.13      | 0.057  |
| A020144_01 | 0.615     | 0.45   | 0.502     | 0.46   | 0.432    | 0.366  | 0.35      | 0.185  |
| A020145_01 | 0.485     | 0.441  | 0.504     | 0.519  | 0.517    | 0.437  | 0.224     | 0.267  |
| A020155_01 | 0.311     | 0.467  | 0.231     | 0.255  | -0.049   | 0.314  | -0.163    | 0.003  |
| A020157_01 | -0.242    | -0.257 | 0.041     | 0.113  | 0.209    | 0.037  | -0.028    | 0.108  |
| A020160_01 | -0.353    | -0.336 | -0.501    | -0.843 | -0.024   | 0.156  | -0.3      | -0.16  |
| A020162_01 | -0.78     | -0.65  | -0.413    | -0.097 | -0.302   | 0.019  | -0.025    | 0.004  |
| A020164_01 | -0.123 NA |        | -0.211    | 0.51   | 0.305 NA |        | -0.005    | -0.048 |
| A020166_01 | -0.142    | -0.043 | -0.166    | -0.113 | -0.04 NA |        | -0.089 NA |        |
| A020167_01 | -0.043    | 0.357  | -0.061    | 0.007  | -0.059   | 0.033  | -0.08     | -0.038 |
| A020169_01 | -0.122    | -0.023 | 0.246     | 0.464  | -0.203   | -0.265 | -0.126    | -0.169 |
| A020170_01 | -0.24     | -0.095 | 0.284     | 0.278  | 0.139    | 0.014  | 0.248     | 0.169  |
| A020171_01 | -1.017    | -0.758 | -0.386    | -0.175 | -0.423   | -0.237 | 0.156     | 0.304  |
| A020172_01 | 0.088     | 0.075  | -0.225    | -0.083 | -0.02    | 0.138  | 0.105     | 0.149  |
| A020173_01 | -0.334    | -0.205 | -0.246    | -0.065 | 0.038    | -0.017 | 0.035     | -0.019 |
| A020178_01 | 0.026     | -0.226 | -0.457    | 0.005  | 0.024    | -0.469 | -0.516    | -0.483 |
| A020179_01 | -0.366    | -0.214 | -0.297    | -0.53  | 0.198    | 0.235  | -0.262    | -0.226 |
| A020183_01 | -0.497    | -0.344 | -0.193 NA |        | -0.371   | -0.453 | -0.204    | -0.238 |
| A020186_01 | -1.585    | -1.82  | -1.082    | -1.428 | -1.582   | -1.875 | -0.705    | -0.564 |
| A020187_01 | -2.139    | -2.012 | -1.905    | -1.229 | -2.156   | -2.146 | -0.698    | -0.345 |
| A020188_01 | 0.504     | 0.233  | 0.321     | -0.211 | 0.12     | 0.046  | 0.165     | 0.04   |
| A020189_01 | 0.038     | 0.069  | 0.181     | -0.017 | 0.007    | -0.007 | 0.028     | -0.075 |
| A020190_01 | -0.281    | -0.26  | 0.107     | -0.094 | -0.046   | -0.137 | -0.06     | -0.09  |
| A020192_01 | -0.092    | -0.572 | -0.611    | -0.269 | 0.368    | -0.029 | -0.414    | -0.442 |
| A020195_01 | -0.251    | -0.176 | -0.282    | -0.201 | -0.251   | -0.205 | -0.294    | -0.221 |
| A020196_01 | -0.605    | -0.563 | -0.336    | -0.036 | 0.019    | 0.069  | -0.105    | -0.093 |
| A020197_01 | 0.31      | 0.056  | -0.13     | 0.143  | -0.253   | -0.522 | -0.154    | -0.09  |
| A020198_01 | 0.513     | 0.188  | 0.115     | -0.147 | 0.247    | 0.166  | 0.154     | 0.017  |
| A020199_01 | 0.159     | 0.394  | 0.45      | 0.358  | 0.092    | 0.065  | -0.037    | 0.193  |
| A020200_01 | -0.116    | -0.046 | -0.476    | -0.364 | -0.104   | -0.109 | -0.362    | -0.205 |
| A020203_01 | 0.639     | 0.724  | 0.817     | -0.175 | 0.118    | 0.304  | 0.574     | 0.567  |
| A020205_01 | -0.386    | -0.124 | -0.526    | 0.071  | -0.086   | 0.261  | 0.106     | 0.025  |
| A020208_01 | 0.709     | 0.736  | 0.049     | -0.147 | 0.147    | 0.128  | -0.168    | -0.108 |
| A020210_01 | 0.452     | 0.49   | 0.008     | 0.112  | 0.185    | 0.303  | -0.006    | 0.077  |

|            |        |           |           |        |           |           |           |        |
|------------|--------|-----------|-----------|--------|-----------|-----------|-----------|--------|
| A020211_01 | 0.051  | 0.049     | -0.58     | -0.291 | 0.415     | 0.46      | 0.018     | 0.081  |
| A020213_01 | 0.469  | 0.376     | 0.424     | -0.083 | 0.226     | 0.16      | 0.55      | 0.335  |
| A020214_01 | -0.109 | 0.146     | 0.353     | -0.393 | 0.63      | 0.874     | 0.673     | 0.629  |
| A020215_01 | 0.129  | 0.156     | 0.03      | 0.247  | 0.161     | 0.212     | 0.074     | 0.01   |
| A020216_01 | -0.46  | -0.679    | -0.113 NA |        | -0.199    | -0.484    | -0.207 NA |        |
| A020217_01 | -0.991 | -1.259    | -0.737    | -0.242 | -1.645    | -2.385    | -1.982    | -1.452 |
| A020219_01 | 0.105  | 0.066     | 0.044     | 0.31   | 0.24 NA   |           | 0.152     | -0.042 |
| A020221_01 | 0.434  | 0.171     | 0.184     | -0.459 | 0.223     | 0.372     | -0.268    | -0.173 |
| A020222_01 | -0.087 | 0.178     | 0.216     | 0.381  | 0.299     | 0.364     | 0.178     | 0.215  |
| A020225_01 | -0.433 | -0.462    | -1.136    | -1.229 | -0.378    | -0.198    | -1.055    | -0.738 |
| A020226_01 | -0.23  | -0.276    | -0.271    | -0.097 | -0.294    | -0.202    | -0.077    | -0.238 |
| A020228_01 | 0.077  | 0.146     | 0.607     | 0.102  | 0.302     | 0.427     | 0.55      | 0.637  |
| A020229_01 | -0.497 | -0.531    | -0.741    | -0.624 | -0.421    | -0.342    | -0.422    | -0.259 |
| A020233_01 | -0.361 | -0.315    | 0.022     | 0.328  | -0.083    | 0.047     | 0.188     | 0.092  |
| A020236_01 | -0.345 | -0.466    | -0.454    | -0.637 | 0.465     | 0.545     | -0.142    | -0.234 |
| A020241_01 | -0.208 | -0.136    | -0.125    | -0.106 | -0.151    | -0.265    | -0.299    | -0.255 |
| A020242_01 | 0.949  | 1.294     | 0.512     | 0.229  | 0.624     | 1.072     | 0.35      | 0.486  |
| A020243_01 | -0.389 | -0.29     | -0.053    | -0.503 | -0.032    | 0.022     | -0.065    | -0.003 |
| A020245_01 | 0.912  | 0.666     | 0.645     | -0.23  | 0.315     | 0.474     | 0.241 NA  |        |
| A020249_01 | 0.179  | -0.199    | 0.146     | 0.234  | 0.1       | 0.055     | 0.09      | -0.034 |
| A020250_01 | -0.043 | -0.167    | 0.066     | 0.203  | -0.117    | -0.198    | 0.141     | 0.21   |
| A020251_01 | 0.008  | -0.11     | -0.048    | 0.053  | 0.068     | -0.029    | 0.438     | 0.296  |
| A020254_01 | 0.635  | 0.779     | 0.179     | -0.306 | 0.169     | 0.315     | 0.064     | 0.311  |
| A020256_01 | 0.314  | 0.357     | 0.014     | 0.039  | 0.105     | 0.314     | -0.012    | 0.084  |
| A020257_01 | -0.214 | -0.302    | 0.253     | 0.451  | 0.023     | -0.055    | 0.236     | 0.27   |
| A020258_01 | -1.53  | -1.357    | -1.389    | -1     | -1.285    | -1.425    | -1.126    | -0.946 |
| A020260_01 | -0.579 | -0.52     | -0.695    | -0.481 | -0.117    | -0.128    | -0.16     | -0.295 |
| A020264_01 | -0.239 | -0.265    | -0.408    | 0.421  | 0.047     | -0.329    | -0.451    | -0.372 |
| A020265_01 | -0.309 | -0.387    | -0.066    | 0.38   | -0.438    | -0.862    | -0.292    | -0.214 |
| A020267_01 | 0.302  | 0.391     | 0.076     | -0.078 | 0.197     | 0.141     | -0.284    | -0.063 |
| A020268_01 | -0.519 | -0.402    | -0.027    | -0.062 | -0.212    | -0.223    | -0.223    | -0.11  |
| A020272_01 | 0.078  | -0.089    | -0.147    | 0.103  | 0.027     | -0.101    | 0.178     | 0.156  |
| A020273_01 | 1.015  | 0.697     | 0.576     | -0.02  | 0.475     | 0.717     | 0.01      | -0.013 |
| A020274_01 | 0.12   | 0.191     | -0.054    | 0.139  | 0.098     | -0.101    | -0.266 NA |        |
| A020281_01 | 0.013  | -0.09     | 0.08      | 0.132  | 0.098     | -0.079    | 0.056     | 0.1    |
| A020283_01 | 0.449  | 0.443     | -0.005    | -0.082 | 0.39      | 0.288     | -0.083    | -0.103 |
| A020286_01 | 0.448  | 0.381     | 0.896     | 0.631  | 0.403     | 0.136     | -0.053    | -0.109 |
| A020289_01 | -0.37  | 0.038     | -0.435    | -0.792 | 0.198     | 0.388     | -0.438    | -0.497 |
| A020290_01 | 0.403  | -0.078    | -0.193    | -0.565 | -0.135    | 0.032     | -0.225    | -0.372 |
| A020291_01 | -0.605 | -0.554    | -0.039    | -0.093 | -0.117    | -0.107    | 0.101     | 0.205  |
| A020293_01 | 0.146  | 0.052     | 0.109     | 0.181  | -0.023    | -0.234    | -0.131 NA |        |
| A020294_01 | 0.182  | 0.084     | 0.181     | 0.092  | 0.215     | 0.159     | 0.092     | 0.008  |
| A020295_01 | -0.16  | -0.225    | 0.069     | -0.205 | -0.198    | -0.235    | -0.028    | -0.051 |
| A020296_01 | -0.287 | -0.399    | -0.483    | 0.195  | -0.278    | -0.206 NA |           | -0.043 |
| A020297_01 | -0.422 | -0.455    | -0.099    | -0.287 | 0.197     | 0.024     | 0.244     | 0.093  |
| A020298_01 | 0.246  | 0.053     | 0.137     | 0.143  | 0.299     | 0.419     | 0.018     | -0.142 |
| A020299_01 | 0.463  | 0.438     | -0.071    | 0.159  | 0.023     | 0.335     | 0.03      | 0.15   |
| A020300_01 | 0.716  | 0.593     | 0.229     | 0.257  | -0.477    | -0.213    | -0.326    | -0.044 |
| A020301_01 | -0.01  | -0.066    | 0.089     | 0.003  | 0.022     | 0.018     | -0.126    | -0.112 |
| A020303_01 | 0.782  | 0.661     | -0.082    | 0.175  | -0.107    | 0.178     | -0.038    | -0.027 |
| A020305_01 | -0.157 | 0         | -0.006    | 0.09   | -0.127    | 0.009     | 0.002     | 0.061  |
| A020306_01 | -0.774 | -0.739    | -0.254    | -0.167 | -0.298    | -0.256    | -0.205 NA |        |
| A020308_01 | -0.075 | 0.041     | 0.028     | 0.287  | 0.319     | 0.161     | -0.201    | -0.131 |
| A020309_01 | -1.12  | -0.891    | -0.249    | 0.349  | -0.18     | -0.429    | -0.083    | -0.303 |
| A020311_01 | 0.405  | 0.203     | -0.43     | -0.121 | -0.234    | -0.225    | -0.126    | -0.167 |
| A020312_01 | -0.503 | -0.747    | -0.73     | -0.415 | -0.631 NA |           | -0.426    | -0.469 |
| A020314_01 | -0.09  | -0.203    | 0.008     | 0.589  | -0.857    | -1.416    | -1.056    | -0.847 |
| A020317_01 | -0.573 | -0.229    | -0.044    | -0.088 | -0.306    | -0.203    | -0.48     | -0.111 |
| A020318_01 | 0.428  | 0.135     | 0.463     | 0.034  | 0.124 NA  |           | 0.426     | 0.225  |
| A020319_01 | -0.541 | -0.668    | -0.215    | -0.261 | -0.218    | -0.128    | -0.326    | -0.276 |
| A020320_01 | -0.242 | -0.174    | -0.165    | -0.426 | 0.102     | 0.073     | 0.043     | 0.142  |
| A020321_01 | 0.166  | 0.272     | 0.444     | 0.237  | 0.181     | 0.196     | 0.222     | 0.18   |
| A020322_01 | 0.497  | 0.482     | 0.075     | 0.144  | 0.016     | 0.032     | 0.03      | 0.066  |
| A020323_01 | 0.081  | 0.069     | 0.07      | 0.076  | -0.079    | -0.112    | -0.032    | -0.008 |
| A020324_01 | 0.267  | 0.155     | 0.143     | -0.005 | -0.009    | 0.316     | 0.003     | 0.174  |
| A020325_01 | -0.602 | -0.675 NA |           | -0.735 | -0.028    | -0.18     | -0.325    | -0.101 |
| A020326_01 | -0.62  | -0.545    | -0.213    | -0.075 | -0.262    | -0.081    | -0.258    | -0.203 |
| A020327_01 | 0.13   | 0.215     | 0.189     | -0.15  | -0.042    | -0.053    | -0.093    | 0.108  |

|            |           |        |          |          |           |        |           |        |
|------------|-----------|--------|----------|----------|-----------|--------|-----------|--------|
| A020330_01 | -0.931 NA |        | 0.354 NA |          | -0.541 NA |        | -0.031    | 0.571  |
| A020331_01 | -0.2      | 0.092  | 0.18     | -0.183   | -0.043    | 0.15   | -0.015    | 0.124  |
| A020332_01 | 0.563     | 0.613  | 0.403 NA |          | 0.318     | 0.376  | 0.502     | 0.108  |
| A020333_01 | -0.081    | -0.206 | 0.057    | 0.528    | 0.227     | -0.139 | -0.02     | -0.052 |
| A020336_01 | 0.08 NA   |        | -0.122   | -0.176   | 0.297 NA  |        | 0.224     | 0.014  |
| A020337_01 | 0.118     | -0.189 | 0.022    | 0.124    | -0.072    | 0.005  | -0.068    | -0.038 |
| A020338_01 | -0.218    | -0.234 | -0.239   | -0.419   | 0.076     | 0.078  | -0.066    | -0.191 |
| A020340_01 | 0.556     | 0.02   | -0.286   | 0.266    | -0.054    | 0.011  | -0.271    | -0.165 |
| A020341_01 | -0.113    | 0.102  | 0.171    | -0.482   | -0.097    | -0.017 | 0.008     | -0.03  |
| A020342_01 | -0.229    | -0.313 | -0.284   | -0.271   | -0.01     | 0.152  | -0.098    | -0.104 |
| A020343_01 | 0.817     | 0.831  | 0.835    | 0.619    | 0.195     | 0.392  | 0.282     | 0.282  |
| A020344_01 | 0.077     | -0.127 | -0.008   | -0.176   | 0.427     | 0.547  | 0.038     | -0.041 |
| A020345_01 | -0.88     | -0.499 | -0.584   | -0.542   | -0.387    | -0.073 | -0.329    | -0.125 |
| A020346_01 | -0.298    | -0.205 | 0.043    | -0.088   | -0.25     | -0.321 | -0.072    | 0.162  |
| A020347_01 | -0.196    | -0.502 | -0.586   | -0.829   | -0.073    | -0.382 | -0.256    | -0.282 |
| A020348_01 | 0.123     | 0.187  | -0.605   | 0.09     | -0.466    | -0.264 | -0.091    | -0.026 |
| A020349_01 | 0.391     | 0.315  | 0.444    | 0.335    | -0.56     | -0.399 | 0.135     | 0.068  |
| A020350_01 | 0.271     | 0.343  | -0.178   | 0.034    | 0.245     | 0.406  | -0.525    | -0.431 |
| A020352_01 | -0.209    | -0.103 | -0.31    | -0.373   | -0.219    | 0.146  | -0.555    | -0.326 |
| A020353_01 | -0.526    | -0.536 | -0.286   | -0.242   | -0.332    | -0.387 | -0.312    | -0.022 |
| A020356_01 | 0.075     | -0.135 | -0.293   | -0.599   | 0.009     | 0.14   | 0.035     | -0.199 |
| A020360_01 | -0.697    | -0.654 | 0.411    | 0.362    | 0.176     | 0.13   | 0.452     | 0.28   |
| A020362_01 | 0.135     | -0.159 | 0.117    | -0.064   | 0.13      | 0.051  | -0.172    | -0.159 |
| A020363_01 | 0.685     | 1.094  | 0.297    | 0.117    | 0.595     | 0.717  | 0.392     | 0.412  |
| A020364_01 | 0.329     | 0.05   | 0.098    | 0.194    | 0.448     | 0.249  | 0.333     | 0.31   |
| A020367_01 | -0.228    | -0.238 | -0.176   | 0.05     | 0.086     | 0.191  | 0.057     | -0.003 |
| A020368_01 | -0.459    | -0.604 | -0.557   | -0.261   | -0.591    | -0.727 | -0.089    | -0.19  |
| A020369_01 | -0.443    | -0.305 | -0.399   | -0.352   | -0.689    | -0.919 | -0.493    | -0.288 |
| A020370_01 | 0.748     | 0.57   | 0.336    | 0.136    | 0.163     | 0.486  | 0.234     | 0.242  |
| A020371_01 | -0.646    | -0.556 | 0.275    | -0.023   | -0.548    | -0.484 | 0.173     | 0.365  |
| A020372_01 | 0.705     | 0.582  | 0.342    | -0.177   | 0.253     | 0.413  | 0.109     | 0.054  |
| A020373_01 | 0.228     | 0.395  | 0.155    | -0.043   | 0.083     | -0.08  | 0.085     | 0.2    |
| A020375_01 | -0.134    | -0.301 | -0.318   | 0.151    | -0.054    | -0.281 | -0.273    | -0.131 |
| A020376_01 | 0.254     | 0.03   | -0.223   | -0.068   | -0.059    | 0.015  | -0.085    | 0.008  |
| A020378_01 | -0.088    | -0.277 | -0.102   | 0.169    | 0.115     | -0.06  | -0.224    | -0.135 |
| A020379_01 | 0.505     | 0.329  | 0.068    | 0.171 NA | NA        |        | -0.08     | -0.203 |
| A020380_01 | 0.03      | -0.016 | -0.139   | 0.353    | -0.04     | 0.186  | 0.067     | 0.013  |
| A020381_01 | 0.305     | 0.317  | -0.162   | 0.214    | -0.272    | -0.167 | -0.255    | -0.185 |
| A020382_01 | -0.459    | -0.559 | -0.276   | 0.214    | -0.115    | -0.274 | -0.022 NA |        |
| A020383_01 | -0.442    | -0.152 | -0.266   | 0.147    | -0.386    | -0.376 | -0.117 NA |        |
| A020384_01 | -0.015    | 0.184  | 0.479    | 0.133    | 0.106     | 0.133  | 0.5       | 0.662  |
| A020385_01 | -0.06     | -0.023 | -0.221   | 0.256    | -0.126    | 0.005  | -0.08     | 0.022  |
| A020386_01 | 0.71      | 0.559  | -0.129   | 0.159    | -0.034    | 0.421  | -0.011    | -0.044 |
| A020390_01 | 0.085     | -0.146 | -0.314   | 0.187    | 0.29      | 0.222  | 0.597     | 0.261  |
| A020392_01 | -0.027    | -0.01  | -0.095   | -0.072   | -0.154    | 0.005  | 0.025     | 0.126  |
| A020393_01 | 0.122     | 0.006  | 0.023    | 0.403    | -0.09     | -0.341 | -0.401    | -0.495 |
| A020394_01 | 0.291     | 0.348  | 0.084    | -0.261   | 0.256     | 0.463  | -0.155    | -0.166 |
| A020395_01 | -0.061    | -0.39  | -0.599   | 0.378    | -0.213    | -0.287 | -0.198 NA |        |
| A020396_01 | -0.153    | -0.23  | 0.093    | -0.255   | -0.1      | 0.008  | -0.07     | -0.088 |
| A020399_01 | 0.321     | 0.286  | 0.354    | -0.036   | 0.214     | 0.273  | 0.238     | 0.129  |
| A020400_01 | 0.909     | 0.89   | 0.683    | 0.965    | 0.339     | 0.566  | 0.257     | 0.12   |
| A020401_01 | 0.157     | 0.034  | 0.134    | 0.01     | -0.272    | -0.139 | -0.171    | -0.058 |
| A020403_01 | -0.925    | -0.944 | -0.246   | 0.38     | -0.148    | -0.117 | 0.313     | 0.253  |
| A020404_01 | -3.693    | -4.22  | -5.592   | -5.549   | -3.626    | -4.034 | -4.471    | -2.829 |
| A020406_01 | -0.027    | 0.081  | -0.199   | 0.324    | -0.102    | -0.078 | -0.536    | -0.122 |
| A020410_01 | -0.604    | -0.493 | -0.224   | 0.213    | -1.179    | -1.236 | -0.419    | -0.262 |
| A020412_01 | 0.163     | 0.318  | 0.058    | -0.371   | -0.164    | -0.194 | -0.058    | 0.078  |
| A020413_01 | -0.091    | 0.055  | 0.24     | -0.362   | 0.083     | 0.18   | 0.33      | 0.301  |
| A020418_01 | -0.008    | 0.093  | 0.049    | -0.384   | 0.013     | 0.044  | 0.17      | 0.161  |
| A020419_01 | -1.124    | -1.665 | -0.971   | -0.7     | -0.079    | -0.092 | -0.082    | -0.287 |
| A020420_01 | -0.939    | -1.14  | -0.81    | -0.853   | -0.367    | -0.574 | 0.041     | -0.075 |
| A020421_01 | 0.114     | 0.142  | 0.336    | -0.249   | 0.007     | 0.023  | 0.327     | 0.485  |
| A020422_01 | -0.013    | 0.029  | -0.045   | -0.067   | 0.103     | 0.158  | -0.302    | -0.426 |
| A020423_01 | 0.421     | 0.154  | -0.096   | 0.422    | 0.283     | 0.351  | 0.057     | -0.017 |
| A020424_01 | -0.006    | 0.315  | 0.322    | 0.179    | 0.207     | 0.351  | 0.131     | 0.332  |
| A020425_01 | 0.51      | 0.428  | -0.239   | -0.188   | 0.013 NA  |        | -0.085 NA |        |
| A020427_01 | -0.542    | -0.392 | -0.187   | -0.2     | -0.417    | -0.38  | -0.35     | -0.285 |
| A020428_01 | 0.26      | 0.309  | 0.007    | -0.123   | 0.166     | 0.532  | 0.465     | 0.22   |

|            |           |        |          |          |           |           |           |        |
|------------|-----------|--------|----------|----------|-----------|-----------|-----------|--------|
| A020435_01 | -0.432    | -0.598 | -0.146   | -0.143   | -0.107    | -0.15     | -0.215    | -0.183 |
| A020436_01 | 1.03      | 1.312  | 0.28     | 0.671    | -0.433    | -0.065    | -0.29 NA  |        |
| A020437_01 | 0.079     | -0.12  | -0.069   | -0.129   | 0.114     | 0.104     | 0.095     | -0.069 |
| A020438_01 | -0.109    | -0.457 | -0.55    | -0.221   | 0.099     | 0.098     | 0.02      | -0.097 |
| A020440_01 | 0.242     | 0.066  | 0.034    | 0.279    | -0.06     | 0.151     | -0.42     | -0.24  |
| A020441_01 | -0.197    | 0.172  | 0.077    | -0.007   | 0.042     | -0.004    | -0.206    | 0.08   |
| A020442_01 | 0.1       | -0.078 | -0.191   | 0.005    | 0.063     | -0.193    | -0.094 NA |        |
| A020443_01 | 0.408     | 0.42   | -0.418   | 0.158    | 0.066     | 0.083     | -0.214    | -0.239 |
| A020444_01 | 0.056     | -0.103 | -0.243   | 0.152    | 0.197     | 0.08      | -0.108    | -0.14  |
| A020445_01 | 0.768     | 0.642  | 0.265    | -0.153   | 0.147     | 0.425     | -0.055    | -0.013 |
| A020446_01 | 0.12      | 0.113  | 0.128    | -0.457   | 0.174     | 0.062     | 0.026     | 0.048  |
| A020452_01 | 0.595     | 0.326  | 0.346    | 0.834    | 0.179     | 0.091     | 0.323     | 0.282  |
| A020455_01 | -0.198    | -0.285 | -0.47    | -0.165   | -0.095    | -0.227 NA |           | 0.142  |
| A020460_01 | 0.04      | 0.061  | 0.763 NA |          | 0.619     | 0.75      | 0.308 NA  |        |
| A020461_01 | -0.384    | -0.068 | 0.482    | 0.907    | 0.072     | -0.097    | 0.479     | 0.371  |
| A020464_01 | -0.011    | -0.149 | 0.255    | 0.477    | 0.092     | 0.06      | 0.124     | 0.044  |
| A020467_01 | -0.12     | -0.019 | 0.12     | 0.161    | 0.004     | -0.044    | -0.063    | 0.013  |
| A020470_01 | -0.11     | -0.102 | -0.416   | 0.131    | -0.071    | -0.252    | -0.026    | -0.002 |
| A020471_01 | 0.591     | 0.63   | 0.258    | -0.439   | 0.12      | 0.377     | 0.25      | 0.214  |
| A020472_01 | 0.491     | 0.351  | 0.17     | 0.055    | 0.258     | 0.317     | -0.035    | -0.171 |
| A020474_01 | -0.017    | -0.041 | -0.213   | -0.342   | 0.228     | 0.18      | 0.162     | 0.083  |
| A020477_01 | 0.117     | -0.004 | 0.189    | -0.177   | 0.278     | 0.196     | 0.3       | 0.176  |
| A020478_01 | 0.412     | 0.56   | 0.145    | 0.193    | -0.09 NA  |           | -0.06 NA  |        |
| A020480_01 | 0.143     | -0.001 | -0.196   | 0.47     | 0.064     | 0.17      | 0.085     | -0.14  |
| A020481_01 | -0.154    | -0.199 | -0.131   | 0.175    | -0.135    | -0.339    | -0.175    | -0.101 |
| A020482_01 | 0.172     | -0.077 | 0.004    | 0.487    | 0.32      | 0.325     | 0.422     | 0.281  |
| A020484_01 | 0.6       | 0.554  | 0.372    | 0.617    | 0.334 NA  |           | 0.157 NA  |        |
| A020486_01 | -0.338    | -0.324 | 0.065    | 0.169    | -0.037    | -0.149    | -0.102    | -0.106 |
| A020488_01 | 0.269 NA  |        | 0.154    | 0.006    | 0.47      | 0.711     | 0.217     | 0.026  |
| A020489_01 | -0.594    | -0.28  | -0.185   | -0.132   | -0.012    | 0.073     | -0.245    | -0.212 |
| A020490_01 | 0.375     | 0.246  | 0.323    | 0.296    | -0.047    | -0.145    | 0.017     | -0.016 |
| A020491_01 | 0.08 NA   |        | -0.195   | 0.093    | 0.201     | 0.45      | -0.131    | 0.031  |
| A020493_01 | 0.212     | 0.035  | 0.215    | -0.196   | 0.083     | -0.081    | -0.214    | -0.24  |
| A020497_01 | -0.482    | -0.167 | -0.349   | -0.481   | 0.174     | 0.301     | -0.313    | -0.036 |
| A020498_01 | -0.321    | -0.174 | -0.242   | 0.112    | -0.217    | -0.075    | -0.14     | -0.019 |
| A020500_01 | -0.562    | -0.541 | -0.467   | 0.207    | -0.241    | -0.255    | -0.276    | -0.26  |
| A020501_01 | 1.011     | 1.042  | 1.136    | 1.313    | 0.52      | 0.621     | 0.445     | 0.266  |
| A020502_01 | 0.015     | -0.079 | 0.04     | 0.156    | 0.01      | -0.164    | -0.096 NA |        |
| A020504_01 | 0.36      | 0.206  | 0.036    | -0.349   | 0.026     | 0.328     | -0.246    | -0.125 |
| A020505_01 | 0.019     | -0.129 | -0.023   | 0.238    | 0.021 NA  |           | -0.005    | -0.201 |
| A020506_01 | 0.098     | 0.011  | -0.152   | 0.125    | -0.171    | -0.126    | -0.075    | -0.08  |
| A020507_01 | 0.237     | 0.235  | 0.109    | -0.047   | 0.233     | 0.167     | 0.079     | -0.014 |
| A020509_01 | -0.342    | -0.304 | 0.086    | -0.071   | -0.096    | -0.021    | -0.007    | 0.012  |
| A020510_01 | 0.054     | -0.161 | 0.102    | -0.228   | 0.064     | -0.019    | -0.087    | -0.451 |
| A020511_01 | 0.339     | 0.392  | 0.017    | -0.059   | 0.182     | -0.079    | -0.145    | -0.186 |
| A020512_01 | 0.231     | 0.459  | 0.604    | 0.721    | 0.526     | 0.649     | 0.491     | 0.452  |
| A020514_01 | -0.197    | -0.354 | -0.122   | 0.045    | -0.094    | -0.171    | -0.105 NA |        |
| A020515_01 | 0.022     | 0.132  | 0.1      | 0.421    | 0.323     | 0.463     | 0.002     | 0.023  |
| A020516_01 | -0.334    | -0.193 | -0.432   | -0.087   | -0.685    | -0.717    | -0.426    | -0.327 |
| A020520_01 | -0.091    | -0.212 | -0.333   | -0.27    | 0.186     | 0.221     | -0.034 NA |        |
| A020521_01 | 0.075     | 0.247  | -0.053   | 0.078    | -0.205    | -0.149    | -0.119    | -0.028 |
| A020522_01 | -0.308    | -0.203 | 0.017    | -0.197   | 0.096     | -0.042    | 0.179     | 0.166  |
| A020523_01 | 0.416     | 0.071  | 0.245    | -0.144   | 0.137 NA  |           | -0.036    | -0.228 |
| A020524_01 | -0.505    | -0.574 | -0.597   | -0.507   | -0.018    | -0.407    | -0.789 NA |        |
| A020529_01 | -0.507    | -0.548 | -0.252   | -0.585   | -0.553    | -0.428    | -0.196    | -0.076 |
| A020530_01 | -0.259    | -0.315 | -0.275   | -0.592   | 0.411     | 0.273     | -0.035    | -0.067 |
| A020533_01 | 0.469     | 0.203  | 0.091    | 0.261    | 0.276     | 0.356     | 0.036     | -0.107 |
| A020534_01 | -0.007    | 0.206  | -0.109   | 0.055    | 0.149     | 0.311     | 0.071     | 0.2    |
| A020535_01 | 0.012     | 0.208  | -0.06    | -0.21    | 0.08      | 0.155     | 0.191     | 0.192  |
| A020537_01 | 0.497     | 0.196  | -0.599   | 0.258 NA | NA        |           | -0.269    | -0.335 |
| A020541_01 | 0.311     | 0.067  | 0.274    | -0.62    | 0.233     | 0.073     | 0.11      | -0.012 |
| A020542_01 | 0.565     | 0.46   | 0.157    | 0.254    | 0.257     | 0.485     | 0.042     | -0.057 |
| A020543_01 | -0.988 NA | NA     |          | -0.298   | -0.224 NA |           | 0.12 NA   |        |
| A020544_01 | -0.099    | -0.317 | -0.353   | -0.074   | 0.046     | 0.107     | 0.065     | -0.077 |
| A020546_01 | -0.13     | -0.183 | 0.344    | 0.196    | 0.387     | 0.208     | 0.326     | 0.096  |
| A020547_01 | 0.451     | 0.111  | -0.1     | 0.088    | -0.037    | 0.026     | 0.108     | -0.022 |
| A020549_01 | -0.134    | -0.173 | -0.089   | 0.09     | -0.156    | -0.211    | -0.279 NA |        |
| A020550_01 | 0.536     | 0.464  | -0.127   | -0.097   | -0.423    | 0.206     | -0.231    | -0.169 |

|            |          |        |          |        |          |        |           |        |
|------------|----------|--------|----------|--------|----------|--------|-----------|--------|
| A020551_01 | -0.154   | -0.036 | -0.23    | -0.546 | 0.193    | 0.078  | -0.004    | -0.139 |
| A020553_01 | -0.204   | -0.178 | 0.206    | 0.307  | -0.35    | -0.459 | -0.169    | -0.046 |
| A020554_01 | -0.377   | -0.338 | -0.182   | 0.263  | -0.004   | -0.022 | 0.301     | 0.235  |
| A020556_01 | -0.454   | -0.611 | -0.776   | -0.394 | -0.834   | -1.082 | -1.221    | -0.816 |
| A020557_01 | 0.299    | -0.117 | -0.196   | 0.438  | 0.054    | -0.291 | -0.556    | -0.521 |
| A020559_01 | 0.577    | 0.835  | 0.59     | 1.028  | -0.4     | -0.355 | -0.369    | -0.291 |
| A020560_01 | 1.289    | 1.502  | 1.418    | 1.255  | 0.811    | 1.068  | 0.669     | 0.844  |
| A020562_01 | 0.04     | 0.019  | 0.075    | 0.015  | -0.008   | -0.131 | -0.106    | -0.05  |
| A020563_01 | 0.26     | 0.193  | -0.15    | 0.136  | -0.237   | 0.256  | -0.01     | 0.116  |
| A020564_01 | 0.434    | 0.254  | 0.168    | 0.022  | 0.32     | 0.267  | 0.136     | 0.066  |
| A020565_01 | 0.487    | 0.554  | 0.422    | 0.253  | -0.215   | 0.263  | 0.232     | 0.337  |
| A020570_01 | 0.841    | 0.471  | -0.313   | -0.314 | -0.029   | 0.164  | 0.135     | 0.018  |
| A020571_01 | -0.35    | -0.435 | -0.132   | -0.016 | -0.113   | -0.08  | 0.172     | 0.262  |
| A020572_01 | 0.475    | 0.453  | 0.587    | 0.278  | 0.113    | 0.392  | 0.66      | 0.272  |
| A020573_01 | -0.705   | -0.378 | -0.215   | -0.342 | -0.486   | -0.404 | 0.025     | 0.184  |
| A020575_01 | 0.103    | -0.083 | -0.158   | 0.187  | 0.023    | 0.053  | 0.122     | 0.013  |
| A020576_01 | -0.179   | -0.309 | 0.024    | 0.219  | -0.011   | -0.122 | 0.055     | -0.005 |
| A020577_01 | 0.58     | 0.232  | 0.062    | -0.236 | 0.174    | 0.537  | 0.105     | 0.178  |
| A020578_01 | 0.338    | 0.32   | -0.173   | -0.068 | -0.294   | -0.309 | -0.237    | -0.099 |
| A020579_01 | 0.325    | 0.362  | 0.304 NA |        | 0.177 NA |        | 0.294 NA  |        |
| A020580_01 | 0.363    | 0.179  | 0.315    | 0.304  | 0.63     | 0.857  | -0.148    | -0.202 |
| A020581_01 | 0.906    | 0.801  | 0.185    | -0.259 | 0.425    | 0.492  | 0.161     | -0.165 |
| A020584_01 | -0.088   | 0.155  | -0.091   | -0.035 | -0.398   | -0.347 | -0.048    | -0.091 |
| A020585_01 | 0.184    | 0.097  | -0.154   | 0.033  | 0.103    | -0.004 | -0.113 NA |        |
| A020586_01 | -0.358   | -0.287 | -0.266   | -0.349 | -0.024   | 0.091  | -0.235    | -0.195 |
| A020587_01 | -0.022   | 0.119  | 0.086    | -0.368 | 0.133    | 0.115  | -0.002    | -0.006 |
| A020588_01 | -0.689   | -0.571 | -0.334   | -0.433 | -0.069   | 0.037  | 0.028     | 0.145  |
| A020589_01 | -0.634   | -0.713 | -0.474   | -0.581 | 0.014    | 0      | -0.552    | -0.529 |
| A020590_01 | 0.006    | 0.097  | 0.087    | -0.741 | 0.398    | 0.674  | 0.584     | 0.6    |
| A020592_01 | 0.42     | 0.262  | 0.138    | 0.391  | 0.008    | 0.049  | -0.317    | -0.263 |
| A020593_01 | 0.292    | 0.162  | 0.164    | -0.115 | 0.021    | -0.069 | 0.048     | 0.088  |
| A020594_01 | -1.021   | -1.166 | -0.702   | -0.533 | -0.603   | -0.783 | 0.704     | 0.527  |
| A020595_01 | 0.211    | 0.429  | 0.119    | -0.323 | 0.17     | 0.35   | 0.248 NA  |        |
| A020599_01 | -0.038   | -0.045 | 0.286    | 0.442  | -0.824   | -1.059 | -0.279    | -0.238 |
| A020600_01 | -0.287   | -0.264 | -0.141   | 0.318  | -0.286   | -0.368 | 0.275     | 0.196  |
| A020601_01 | -0.136   | 0.02   | -0.153   | 0.297  | -0.387   | -0.44  | 0.185     | 0.099  |
| A020602_01 | -0.315   | -0.169 | 0.061    | -0.714 | 0.006    | -0.119 | -0.04     | -0.154 |
| A020603_01 | -1.058   | -0.822 | -0.392   | -0.66  | -0.243   | 0.154  | -0.148    | -0.055 |
| A020604_01 | 0.786    | 0.691  | 0.433    | 0.151  | -0.072   | 0.152  | -0.075    | -0.077 |
| A020605_01 | -0.621   | -0.766 | -0.967   | -0.952 | 0.038    | 0.156  | -0.483    | -0.374 |
| A020606_01 | 0.095    | 0.383  | 0.358    | 0.307  | 0.133    | 0.538  | 0.336     | 0.164  |
| A020608_01 | -0.127   | -0.406 | -0.033   | -0.043 | 0.032    | 0.003  | 0.047     | -0.11  |
| A020610_01 | -0.236   | -0.255 | -0.763   | 0.158  | -0.109   | -0.012 | -0.379    | -0.224 |
| A020611_01 | -0.193   | -0.321 | -0.049   | -0.473 | 0.054    | -0.084 | 0.207     | -0.151 |
| A020612_01 | 0.071    | 0.054  | 0.103    | -0.13  | -0.014   | 0.188  | 0.095     | -0.012 |
| A020613_01 | -0.969   | -0.954 | -0.521   | -1.054 | -0.154   | -0.407 | -0.214    | -0.294 |
| A020615_01 | 0.294 NA |        | 0.031    | -0.714 | 0.677    | 0.928  | 0.07      | -0.022 |
| A020616_01 | 0.125    | 0.194  | -0.065   | 0.079  | -0.401   | -0.584 | -0.389    | -0.215 |
| A020617_01 | 0.455    | 0.486  | 0.421    | 0.392  | 0.595    | 0.758  | -0.08     | -0.003 |
| A020619_01 | 0.214    | 0.017  | 0.268    | -0.425 | 0.169    | 0.057  | 0.081     | 0.075  |
| A020620_01 | 0.585    | 0.524  | -0.172   | -0.479 | 0.143    | 0.626  | 0.133     | 0.063  |
| A020621_01 | 0.397    | 0.477  | 0.042    | 0.103  | 0.335    | 0.533  | 0.341     | 0.38   |
| A020622_01 | 0.645    | 0.473  | 0.177    | -0.115 | 0.145    | 0.386  | 0.168     | 0.023  |
| A020623_01 | -0.144   | -0.101 | -0.031   | -0.08  | -0.046   | -0.082 | 0.056     | -0.021 |
| A020625_01 | -0.001   | 0.144  | 0.057    | 0.266  | 0.148    | 0.2    | 0.078     | 0.057  |
| A020627_01 | -0.046   | -0.461 | -0.666   | 0.128  | -0.113   | -0.391 | -0.077    | -0.029 |
| A020629_01 | 0.253    | 0.219  | 0.265    | 0.213  | 0.3      | 0.472  | 0.038     | -0.115 |
| A020630_01 | 1.012    | 0.786  | 0.359    | 0.393  | 0.021    | 0.542  | 0.243     | 0.185  |
| A020633_01 | 0.222    | 0.438  | -0.013   | 0.236  | 0.166    | 0.491  | -0.062    | 0.168  |
| A020638_01 | 1.02     | 0.75   | 0.46     | -0.536 | -0.18    | 0.429  | 0.037     | 0.046  |
| A020639_01 | 0.451 NA |        | 0.521    | -0.197 | 0.313 NA |        | 0.315     | 0.277  |
| A020640_01 | -0.367   | -0.252 | 0.341    | -0.281 | 0.042    | 0.13   | 0.334     | 0.224  |
| A020641_01 | 0.035    | 0.152  | 0.322    | -0.336 | 0.023    | -0.051 | 0.24      | 0.127  |
| A020643_01 | 0.136    | -0.231 | 0.536    | 0.61   | -0.487   | -1.039 | 0.173     | -0.036 |
| A020645_01 | 0.274    | 0.278  | 0.221    | -0.029 | 0.31     | 0.546  | -0.01     | 0.081  |
| A020646_01 | -0.158   | -0.139 | -0.06    | 0.184  | 0.09     | 0.043  | -0.025    | -0.087 |
| A020647_01 | 0.353    | 0.285  | -0.035   | -0.582 | 0.355 NA |        | 0.332     | 0.216  |
| A020649_01 | 0.16     | 0.071  | 0.09     | 0.294  | 0.064    | 0.051  | 0.142     | 0.072  |

|            |        |        |           |           |           |        |           |        |
|------------|--------|--------|-----------|-----------|-----------|--------|-----------|--------|
| A020650_01 | 0.827  | 0.674  | -0.143    | -0.092    | 0.175     | 0.821  | 0.064     | 0.042  |
| A020652_01 | 0.203  | -0.003 | -0.163    | 0.107     | -0.037    | -0.168 | 0.041     | -0.053 |
| A020653_01 | 0.174  | 0.141  | -0.43     | -0.591    | 0.368 NA  |        | -0.2      | -0.365 |
| A020654_01 | -0.036 | -0.04  | -0.036 NA |           | 0.217     | -0.015 | 0.335 NA  |        |
| A020656_01 | 0.545  | 0.515  | 0.621     | 0.684     | 0.774     | 0.871  | 0.387     | 0.205  |
| A020658_01 | 0.361  | 0.204  | 0.037     | 0.175     | 0.017     | -0.1   | -0.07     | -0.283 |
| A020659_01 | -0.088 | -0.149 | 0.339     | 0.133 NA  |           | -0.566 | 0.002     | -0.005 |
| A020660_01 | -0.436 | -0.203 | -0.088    | 0.314     | -0.107    | -0.147 | -0.295    | -0.125 |
| A020661_01 | 0.565  | 0.488  | 0.14      | 0.324     | 0.14      | 0.203  | -0.299 NA |        |
| A020663_01 | -0.14  | -0.43  | -0.3      | 0.313     | 0 NA      |        | -0.015    | -0.108 |
| A020664_01 | -0.095 | 0.292  | 0.687     | 0.465     | 0.113     | 0.203  | 0.163     | 0.224  |
| A020665_01 | 0.292  | -0.07  | 0.043     | -0.338    | -0.05 NA  |        | 0.141     | 0.022  |
| A020668_01 | 0.279  | 0.288  | 0.072     | 0.361     | -0.02     | 0.085  | -0.024    | -0.016 |
| A020670_01 | 0.432  | 0.232  | 0.396     | 0.106     | 0.195     | 0.13   | 0.164     | -0.057 |
| A020671_01 | -0.567 | -0.712 | -1.117    | -0.482    | -0.182    | -0.185 | -0.476    | -0.352 |
| A020673_01 | 0.508  | 0.466  | -0.033    | -0.116    | 0.275     | 0.45   | 0.076     | -0.146 |
| A020678_01 | 0.027  | -0.183 | -0.181    | 0.307     | 0.127     | -0.07  | -0.205    | -0.21  |
| A020683_01 | -0.036 | -0.217 | -0.027    | 0.101     | -0.016    | -0.098 | -0.149    | -0.291 |
| A020684_01 | -0.792 | -0.183 | 0.488     | 0.184     | -0.216    | 0.091  | 0.04      | 0.493  |
| A020686_01 | 0.434  | 0.466  | 0.646     | 0.167     | 0.327     | 0.582  | 0.491     | 0.352  |
| A020689_01 | -0.171 | -0.193 | -0.486    | 0.043     | -0.433    | -0.563 | -0.729    | -0.531 |
| A020690_01 | -0.229 | -0.271 | -0.406    | -0.519    | -0.11     | -0.082 | -0.242    | -0.487 |
| A020691_01 | 0.556  | 0.339  | -0.485    | -0.18     | 0.222     | 0.495  | 0.286     | 0.176  |
| A020692_01 | -0.352 | -0.134 | -0.329    | -0.189    | -0.053    | -0.013 | -0.308 NA |        |
| A020694_01 | 0.355  | 0.141  | 0.491     | -0.468 NA |           | 0.214  | 0.481     | 0.295  |
| A020696_01 | 0.018  | 0.045  | -0.265    | -0.608    | 0.18      | 0.06   | 0.034     | -0.199 |
| A020697_01 | 0.381  | 0.181  | -0.188    | 0.374     | -0.264    | -0.402 | -0.29     | -0.38  |
| A020699_01 | -0.262 | -0.186 | -0.24     | -0.199    | -0.228    | -0.211 | -0.049    | 0.156  |
| A020702_01 | -0.636 | -0.53  | 0.111     | -0.08     | -0.171    | 0.139  | 0.347     | 0.47   |
| A020703_01 | -0.264 | -0.335 | 0.153     | -0.093    | -0.303    | -0.315 | -0.198    | -0.152 |
| A020704_01 | -0.122 | 0.168  | 0.195     | -0.15     | -0.047    | 0.222  | 0.472     | 0.63   |
| A020705_01 | 0.309  | 0.305  | -0.009    | -0.899    | 0.038     | 0.202  | 0.047     | -0.122 |
| A020707_01 | 0.114  | 0.057  | -0.068    | 0.072     | 0.066     | -0.062 | 0.115     | -0.199 |
| A020708_01 | -0.3   | -0.088 | -0.028    | -0.218    | -0.156    | -0.189 | -0.007    | 0.091  |
| A020710_01 | -0.476 | -0.453 | -0.48     | -0.029    | -0.475    | -0.342 | -0.123    | 0.011  |
| A020713_01 | 0.875  | 0.614  | 0.439     | 0.058     | 0.11 NA   |        | -0.024    | -0.124 |
| A020714_01 | 0.08   | 0.071  | 0.178     | -0.501    | -0.1      | -0.053 | -0.028 NA |        |
| A020716_01 | -0.173 | -0.151 | -0.448    | 0.235     | 0.171     | 0.055  | -0.138    | -0.232 |
| A020722_01 | -0.256 | 0.121  | 0.023     | -0.217    | -0.106 NA |        | 0.141     | -0.149 |
| A020725_01 | -0.135 | 0.249  | -0.09     | -0.058    | -0.136    | -0.061 | -0.411    | -0.097 |
| A020727_01 | -0.446 | -0.352 | -0.269    | -0.174    | -0.373    | -0.424 | -0.123    | -0.36  |
| A020728_01 | 0.583  | 0.703  | 0.52      | -0.095    | 0.199     | 0.379  | 0.041     | -0.05  |
| A020730_01 | -1.169 | -1.485 | -0.465    | -0.098    | -1.263    | -1.784 | -0.839    | -0.723 |
| A020731_01 | 1.001  | 0.838  | -0.02     | -0.103    | 0.363     | 0.697  | 0.1       | 0.12   |
| A020732_01 | -0.544 | -0.466 | 0.295     | 0.262     | -0.517    | -0.797 | 0.116     | 0.033  |
| A020733_01 | -0.169 | -0.276 | 0.477     | 0.519     | -0.242    | -0.391 | 0.098     | 0.039  |
| A020734_01 | -0.068 | 0.133  | 0.522     | 0.597     | 0.463     | 0.474  | -0.585    | -0.392 |
| A020735_01 | -0.08  | 0.011  | 0.533     | 0.283     | -0.162    | -0.077 | 0.388     | 0.21   |
| A020737_01 | 0.024  | 0.013  | -0.246    | -0.163    | 0.355     | 0.341  | -0.203    | -0.122 |
| A020738_01 | -0.035 | -0.041 | -0.375    | -0.211    | -0.283    | -0.204 | -0.207    | -0.192 |
| A020740_01 | -0.386 | -0.421 | -0.282    | -0.022    | -0.175    | -0.282 | -0.042    | -0.148 |
| A020741_01 | 0.216  | 0.088  | 0.072     | -0.116    | 0.239     | 0.238  | -0.192    | -0.403 |
| A020746_01 | -0.491 | -0.519 | -0.303    | 0.024     | -0.389    | -0.498 | -0.001    | -0.086 |
| A020748_01 | 0.477  | 0.44   | 0.613     | 0.645     | 0.978     | 1.238  | 0.348     | 0.209  |
| A020750_01 | -0.285 | -0.218 | 0.111     | 0.264     | 0.066     | -0.042 | -0.062    | -0.073 |
| A020751_01 | -0.066 | 0.219  | 0.466     | 0.051     | -0.264    | 0.122  | -0.297    | -0.105 |
| A020754_01 | 0.259  | 0.097  | 0.684     | 0.369     | 0.129     | 0.024  | 0.436     | 0.179  |
| A020756_01 | -0.054 | -0.112 | -0.419    | 0.009     | 0.214     | 0.069  | -0.083    | -0.049 |
| A020757_01 | -0.012 | 0.011  | -0.366    | -0.26     | -0.085    | -0.079 | -0.029    | -0.155 |
| A020759_01 | 0.556  | 0.463  | 0.068     | 0.074     | 0.172     | 0.18   | -0.034    | -0.136 |
| A020760_01 | -1.603 | -1.864 | -1.719    | -1.816    | -1.084    | -1.33  | -1.172    | -0.968 |
| A020761_01 | -0.137 | -0.042 | -0.092    | -0.631    | 0.062     | 0.402  | -0.183    | -0.087 |
| A020762_01 | 0.317  | 0.225  | -0.134    | -0.476    | -0.025    | -0.219 | -0.192 NA |        |
| A020763_01 | -0.408 | 0.072  | -0.266    | -0.182    | -0.035    | 0.295  | 0.201     | 0.38   |
| A020765_01 | -0.174 | -0.287 | -0.021    | 0.029     | -0.107    | -0.15  | -0.13     | -0.218 |
| A020766_01 | -0.383 | -0.091 | 0.034     | 0.061     | -0.167    | 0.023  | -0.256    | -0.108 |
| A020767_01 | -0.424 | -0.321 | -0.627    | -0.447    | -0.284    | -0.314 | -0.113    | -0.221 |
| A020769_01 | 0.416  | 0.435  | 0.011     | -0.233    | 0.073     | 0.424  | -0.077 NA |        |



|            |           |        |        |        |           |        |           |        |
|------------|-----------|--------|--------|--------|-----------|--------|-----------|--------|
| A020771_01 | -0.201    | -0.017 | 0.066  | -0.314 | -0.041    | 0.07   | -0.079    | -0.116 |
| A020774_01 | -0.349    | -0.266 | -0.257 | -0.375 | -0.199    | -0.271 | 0.138     | 0.037  |
| A020777_01 | 0.895     | 0.811  | 0.75   | 0.396  | 0.859     | 0.946  | 0.906     | 0.358  |
| A020778_01 | 0.555     | 0.423  | -0.344 | -0.259 | 0.051     | 0.53   | 0.05      | 0.089  |
| A020780_01 | -0.378    | 0.017  | -0.204 | 0.142  | -0.035    | 0.11   | -0.274    | 0.228  |
| A020781_01 | 0.268     | 0.172  | 0.022  | 0.024  | 0.03      | 0.007  | -0.208    | -0.322 |
| A020784_01 | -0.275    | -0.403 | -0.113 | -0.818 | -0.025    | -0.027 | -0.179    | -0.375 |
| A020785_01 | -0.047    | -0.017 | 0.37   | -0.276 | 0.295     | 0.276  | 0.005     | 0.165  |
| A020788_01 | 0.722     | 0.822  | 1.066  | 1.058  | 0.154     | 0.483  | 0.532     | 0.578  |
| A020795_01 | -0.056    | 0.012  | -0.218 | -0.694 | -0.14     | 0.238  | 0.132     | 0.139  |
| A020796_01 | -0.32     | -0.382 | -0.328 | -0.602 | -0.189    | -0.142 | -0.088    | -0.092 |
| A020797_01 | 0.119     | 0.48   | 0.201  | 0.172  | -0.062    | 0.02   | -0.295    | -0.003 |
| A020798_01 | -0.555    | -0.903 | -0.354 | -0.229 | -0.553    | -0.833 | 0.138     | 0.007  |
| A020799_01 | -0.017    | -0.141 | -0.203 | -0.173 | 0.018     | 0.113  | 0.046     | 0.009  |
| A020800_01 | -0.067    | -0.183 | 0.033  | 0.222  | 0.254     | 0.16   | 0.033     | -0.129 |
| A020802_01 | -0.247    | -0.334 | -0.594 | 0.156  | -0.075    | -0.18  | -0.335    | -0.256 |
| A020803_01 | -0.238    | -0.345 | -0.286 | -0.215 | 0.531     | 0.54   | -0.112    | -0.159 |
| A020806_01 | -0.85     | -0.67  | -1.086 | -0.777 | -0.198    | 0.014  | -0.469    | -0.415 |
| A020807_01 | -0.281    | -0.399 | -0.444 | -0.252 | -0.021    | -0.033 | -0.175    | -0.189 |
| A020809_01 | -0.136    | -0.359 | -0.41  | 0.329  | 0.171     | 0.009  | -0.029    | -0.124 |
| A020811_01 | -0.453    | -0.831 | -0.539 | -0.295 | -0.14     | -0.7   | -0.241    | -0.271 |
| A020813_01 | -0.316 NA |        | 0.33   | -0.038 | -0.285 NA |        | 0.589     | 0.666  |
| A020816_01 | 0.134 NA  |        | -0.287 | -0.737 | 0.249     | 0.032  | 0.1       | -0.142 |
| A020817_01 | -0.364    | -0.202 | 0.396  | -0.111 | -0.036    | -0.215 | 0.058     | 0.174  |
| A020818_01 | 0.12      | 0.192  | 0.435  | 0.24   | 0.164     | -0.009 | 0.186     | 0.027  |
| A020819_01 | -0.395    | -0.666 | -0.627 | -0.777 | -0.15     | -0.208 | -0.446    | -0.506 |
| A020820_01 | 0.412     | 0.312  | 0.141  | -0.059 | -0.159    | -0.003 | -0.144    | -0.092 |
| A020821_01 | 0.103     | -0.19  | -0.085 | -0.013 | 0.083     | 0.097  | -0.084    | -0.247 |
| A020823_01 | 0.315     | 0.195  | 0.175  | -0.194 | 0.096     | 0.1    | 0.212     | 0.05   |
| A020825_01 | 0.504     | 0.463  | 0.231  | 0.292  | 0.136     | 0.073  | 0.05      | -0.174 |
| A020826_01 | -0.098    | -0.074 | -0.114 | 0.05   | -0.276    | -0.252 | -0.363    | -0.185 |
| A020827_01 | -0.25     | -0.307 | -0.431 | -0.601 | 0.116     | 0.08   | -0.033 NA |        |
| A020828_01 | -0.118    | -0.25  | -0.365 | -0.247 | 0.036     | -0.026 | -0.117    | -0.169 |
| A020831_01 | -0.563    | -0.609 | 0.014  | -0.643 | -0.003    | -0.22  | 0.188     | 0.019  |
| A020835_01 | -0.18     | 0.061  | -0.008 | 0.173  | -0.404    | -0.217 | -0.057    | 0.046  |
| A020836_01 | -0.019    | -0.041 | 0.32   | 0.47   | 0.478     | 0.434  | 0.14      | -0.069 |
| A020838_01 | -0.064    | -0.038 | -0.388 | 0.042  | 0.112     | 0.067  | -0.109    | -0.001 |
| A020839_01 | -0.347    | -0.318 | -0.054 | 0.216  | -0.223    | -0.27  | -0.138    | -0.073 |
| A020841_01 | -0.278    | 0.133  | 0.452  | -0.004 | 0.085     | 0.128  | -0.068    | 0.224  |
| A020842_01 | -0.137    | 0.156  | 0.132  | 0.019  | -0.172    | -0.112 | -0.224    | -0.077 |
| A020843_01 | 0.099     | -0.073 | 0.239  | 0.066  | -0.174    | -0.303 | 0.017     | -0.136 |
| A020844_01 | 0.577     | 0.572  | -0.023 | 0.293  | 0.037     | 0.186  | -0.062    | -0.233 |
| A020845_01 | 0.366     | 0.215  | -0.559 | 0.229  | 0.17      | 0.077  | -0.18     | -0.324 |
| A020847_01 | 0.707     | 0.902  | 1.098  | 0.842  | 0.266     | 0.362  | 0.41      | 0.394  |
| A020849_01 | -0.253    | -0.179 | -0.043 | 0.313  | 0.109     | 0.009  | -0.094    | -0.127 |
| A020850_01 | -0.326    | -0.465 | 0.046  | 0.01   | 0.201     | -0.011 | 0.052     | 0.029  |
| A020852_01 | 0.668     | 0.734  | 0.353  | 0.004  | -0.236    | 0.026  | 0.035     | 0.126  |
| A020853_01 | -0.549    | 0.073  | 0.232  | 0.069  | -0.028    | 0.031  | -0.228    | 0.075  |
| A020854_01 | 0.12      | 0.088  | -0.276 | -0.309 | 0.336     | 0.253  | -0.073    | -0.302 |
| A020855_01 | -1.205    | -0.797 | -0.648 | -0.546 | -0.777    | -0.418 | -0.267    | -0.011 |
| A020860_01 | 0.264     | 0.048  | 0.398  | 0.153  | 0.155     | 0.101  | 0.199     | -0.008 |
| A020861_01 | -0.099    | -0.07  | -0.026 | 0.292  | -0.302    | -0.459 | -0.244    | -0.203 |
| A020863_01 | 0.046     | 0.097  | -0.338 | -0.462 | -0.026    | 0.301  | -0.008    | -0.015 |
| A020866_01 | 0.542     | 0.511  | 0.257  | -0.372 | 0.401     | 0.517  | 0.559     | 0.305  |
| A020868_01 | 0.78      | 0.69   | 0.406  | 0.651  | 0.034     | 0.35   | 0.238     | 0.113  |
| A020869_01 | 0.163     | 0.345  | -0.065 | -0.035 | 0.049     | 0.476  | -0.401    | -0.284 |
| A020870_01 | -1.136    | -1.276 | -0.614 | -0.682 | -0.911    | -1.262 | -0.122    | -0.064 |
| A020871_01 | -0.37     | -0.192 | 0.226  | -0.139 | 0.016     | -0.14  | -0.143    | 0.004  |
| A020872_01 | -0.294    | -0.494 | 0.015  | 0.162  | -0.235    | -0.552 | -0.07     | -0.254 |
| A020873_01 | 0.328     | 0.19   | 0.316  | -0.153 | 0.383     | 0.331  | 0.175     | -0.025 |
| A020876_01 | -0.266    | -0.397 | -0.273 | -0.102 | -0.18     | -0.275 | 0.13      | -0.043 |
| A020879_01 | -0.078    | 0.061  | 0.061  | 0.18   | 0.057     | 0.04   | -0.05     | -0.105 |
| A020880_01 | -1.521    | -1.856 | -1.904 | -1.779 | -1.277    | -1.452 | -1.034    | -0.776 |
| A020881_01 | -0.26     | -0.179 | -0.536 | -0.09  | -0.204    | -0.28  | -0.227    | -0.179 |
| A020882_01 | -0.328    | -0.299 | -0.134 | 0.045  | -0.14     | -0.156 | 0.076     | 0.172  |
| A020883_01 | 0.188     | 0.132  | -0.029 | 0.207  | -0.177    | -0.126 | -0.019    | -0.153 |
| A020889_01 | -0.837    | -0.339 | 0.178  | -0.005 | 0.041     | 0.335  | -0.184    | 0.163  |
| A020892_01 | -0.376    | -0.599 | -0.249 | 0.06   | 0.148     | 0.203  | 0.038     | 0.113  |

|            |          |           |        |           |           |           |           |        |
|------------|----------|-----------|--------|-----------|-----------|-----------|-----------|--------|
| A020900_01 | 0.104    | 0.049     | 0.235  | 0.547     | 0.254     | 0.19      | 0.215     | 0.124  |
| A020902_01 | 0.333    | 0.199     | -0.399 | -0.537    | -0.083    | 0.448     | 0.238     | 0.115  |
| A020905_01 | -1.125   | -1.136    | -0.521 | -0.596    | -1.346    | -1.848    | -1.015 NA |        |
| A020906_01 | 0.393    | 0.25      | -0.063 | -0.096    | 0.203     | 0.199     | -0.092    | -0.123 |
| A020910_01 | 0.24     | 0.303     | 0.528  | 0.827     | -0.012    | -0.217    | 0.435     | 0.322  |
| A020916_01 | -0.128   | -0.244    | -0.139 | -0.217    | -0.435    | -0.423    | -0.19     | -0.154 |
| A020917_01 | -1.356   | -1.405    | -0.487 | -0.702    | -0.625    | -0.569    | -0.509    | -0.281 |
| A020919_01 | 0.306    | 0.151     | 0.279  | 0.119     | -0.221    | -0.494    | 0.183     | 0.168  |
| A020924_01 | 0.08     | -0.136 NA |        | 0.265     | 0.281     | 0.145 NA  |           | -0.18  |
| A020926_01 | -0.208   | 0.02      | 0.316  | -0.295    | 0.009     | 0.509     | 0.57      | 0.553  |
| A020928_01 | 0.402    | 0.302     | 0.209  | -0.253    | -0.104    | -0.069    | 0.237     | 0.171  |
| A020929_01 | -0.466   | -0.356    | -0.12  | -0.394    | -0.145    | -0.097    | -0.058    | 0.032  |
| A020930_01 | 0.718    | 0.661     | -0.227 | 0.495     | -0.068    | -0.176    | -0.643    | -0.409 |
| A020934_01 | -0.566   | -0.918    | -0.007 | -0.112    | -0.497    | -0.869    | -0.11     | -0.1   |
| A020937_01 | 0.175    | 0.073     | 0.152  | 0.303     | 0.095     | -0.185    | 0.039     | -0.059 |
| A020943_01 | 0.37     | 0.103     | 0.199  | 0.231     | 0.064     | 0.372     | -0.091    | -0.048 |
| A020944_01 | 0.069    | 0.244     | -0.148 | 0.063     | 0.192     | -0.002    | -0.023    | -0.297 |
| A020949_01 | -0.117   | 0.072     | 0.476  | 0.142     | -0.02     | 0.076     | 0.424     | 0.326  |
| A020952_01 | 0.078    | 0.286     | 0.204  | 0.142     | -0.284    | -0.233    | -0.373    | -0.256 |
| A020955_01 | -0.071   | -0.146    | -0.519 | -0.104    | 0.435     | 0.462     | 0.22      | 0.105  |
| A020958_01 | -0.061   | -0.005    | -0.068 | 0.425     | 0.079     | 0.274     | 0.097     | 0.131  |
| A020959_01 | 0.2      | 0.271     | -0.272 | 0.006     | -0.122    | 0.23      | 0.213     | 0.372  |
| A020960_01 | -0.628   | -0.466    | -0.146 | -0.046    | -0.235    | -0.282    | -0.125    | -0.006 |
| A020961_01 | 0.242 NA |           | -0.458 | -0.614    | 0.254 NA  |           | 0.269     | -0.069 |
| A020964_01 | -0.64 NA | NA        |        | -0.686 NA | NA        |           | -0.035 NA |        |
| A020965_01 | 0.135    | 0.155     | -0.011 | -0.121    | 0.133     | 0.064     | 0.013     | -0.025 |
| A020970_01 | -0.141   | -0.321    | -0.084 | -0.133    | -0.108    | -0.218    | 0.014     | -0.298 |
| A020971_01 | -2.864   | -3.126    | -1.058 | -1.024    | -0.996    | -0.846    | 0.893     | 0.662  |
| A020974_01 | 0.012    | 0.486     | 0.26   | 0.268     | -0.31     | -0.043    | 0.085     | 0.277  |
| A020976_01 | 0.168    | 0.064     | -0.513 | -0.303    | -0.022    | 0.088     | -0.089    | -0.289 |
| A020978_01 | -0.374   | -0.274    | 0.171  | 0.533     | -0.388    | -0.661 NA |           | -1.337 |
| A020980_01 | -0.865   | -1.288    | -1.046 | -0.297    | -0.482    | -0.476    | -0.255    | -0.194 |
| A020981_01 | 0.116    | 0.156     | -0.668 | 0.009     | -0.068    | -0.008    | -0.108    | -0.12  |
| A020982_01 | 0.089    | -0.054    | -0.046 | -0.116    | -0.201    | -0.17     | 0.066     | 0.013  |
| A020985_01 | -0.311   | -0.469    | -0.25  | -0.082    | -0.047    | -0.078    | -0.138    | -0.092 |
| A020987_01 | 0.182    | 0.211     | 0.105  | -0.754    | 0.161     | 0.114     | 0.054     | -0.172 |
| A020991_01 | -0.062   | -0.13     | -0.503 | -0.114    | -0.152    | -0.274    | -0.009    | -0.1   |
| A020992_01 | -0.177   | -0.264    | -0.071 | 0.167     | 0.076     | 0.011     | 0.079     | -0.055 |
| A020997_01 | -0.075   | 0.18      | 0.03   | -0.045    | -0.114    | 0.122     | 0.037     | 0.057  |
| A020998_01 | 0.124    | 0.022     | 0.061  | 0.055     | -0.118    | -0.274    | -0.29     | -0.179 |
| A020999_01 | 0.253    | 0.202     | -0.146 | 0.227     | 0.057     | -0.065    | -0.263    | -0.31  |
| A021002_01 | 0.077    | 0.236     | 0.218  | -0.158    | 0.059     | 0.092     | -0.042    | 0.06   |
| A021003_01 | 0.333    | 0.289     | 0.327  | -0.089    | -0.007    | -0.098    | 0.333     | 0.273  |
| A021005_01 | 0.53     | 0.183     | -0.216 | -0.002    | -0.343 NA |           | -0.062    | -0.101 |
| A021009_01 | -0.208   | -0.126    | 0.32   | -0.415    | -0.013    | -0.149    | 0.184     | -0.196 |
| A021010_01 | -0.055   | -0.197    | -0.39  | 0.018     | -0.141    | -0.369    | -0.409    | -0.336 |
| A021011_01 | -0.194   | -0.179    | 0.211  | -0.101    | -0.197    | -0.103    | -0.098    | -0.01  |
| A021012_01 | -0.482   | -0.556    | -0.467 | 0.404     | -0.114    | -0.148    | 0.062     | -0.003 |
| A021015_01 | 0.328    | 0.213     | 0.143  | 0.163     | 0.087     | 0.145     | -0.017    | -0.139 |
| A021019_01 | 0.129    | 0.094     | -0.116 | -0.023    | 0.097     | 0.086     | -0.061    | 0.039  |
| A021021_01 | -0.363   | -0.424    | -0.258 | -0.167    | -0.101    | -0.06     | 0.188     | 0.084  |
| A021025_01 | -0.195   | -0.183    | -0.182 | 0.096     | 0.077     | 0.304     | 0.11      | 0.076  |
| A021026_01 | 0.536    | 0.483     | 0.648  | 0.894     | 0.449     | 0.453     | 0.667     | 0.735  |
| A021034_01 | -0.087   | -0.028    | -0.048 | -0.438    | -0.076    | -0.246    | -0.133    | 0.12   |
| A021035_01 | 0.234    | 0.33      | 0.348  | -0.142    | 0.043     | 0.231     | -0.015    | -0.038 |
| A021037_01 | 0.072    | -0.309    | 0.491  | 0.449     | 0.006     | -0.555    | 0.428     | 0.22   |
| A021040_01 | 0.298    | 0.281     | -0.173 | 0.233     | -0.008    | 0.219     | 0.208     | 0.132  |
| A021041_01 | -1.139   | -1.275    | -0.325 | -0.351    | -1.003    | -1.252    | -0.452    | -0.432 |
| A021042_01 | -0.407   | -0.483    | 0.323  | -0.225    | 0.351     | 0.627     | 0.584     | 0.444  |
| A021044_01 | -0.966   | -0.755    | -0.173 | -0.116    | -0.147    | 0.233     | 0.342     | 0.314  |
| A021045_01 | 0.912    | 0.82      | 0.058  | 0.178     | 0.172     | 0.452     | -0.049    | -0.089 |
| A021046_01 | 0.06     | 0.022     | -0.48  | 0.351     | -0.118    | -0.12     | -0.434    | -0.312 |
| A021047_01 | -0.069   | 0.055     | 0.121  | -0.134    | 0.103     | 0.287     | 0.261     | 0.286  |
| A021048_01 | -0.471   | -0.523    | 0.114  | 0.074     | -0.203    | -0.491    | -0.013 NA |        |
| A021049_01 | 0.46     | 0.088     | 0.039  | -0.072    | -0.004    | -0.25     | 0.006     | -0.001 |
| A021051_01 | 0.497    | 0.364     | -0.6   | -1.016    | 0.194     | 0.248     | -0.633    | -0.485 |
| A021053_01 | -1.049   | -1.407    | -0.117 | 0.174     | -1.119    | -1.454    | 0.511     | 0.31   |
| A021055_01 | 0.109    | 0.264     | -0.241 | 0.198     | 0.424     | 0.556     | 0.231     | -0.065 |

|            |           |          |        |        |          |           |          |        |
|------------|-----------|----------|--------|--------|----------|-----------|----------|--------|
| A021057_01 | 0.19      | -0.062   | -0.467 | -0.092 | 0.141    | 0.296     | -0.039   | -0.147 |
| A021058_01 | -0.588    | -0.372   | -0.94  | -0.538 | -0.161   | 0.051     | -0.237   | -0.107 |
| A021059_01 | -0.148 NA |          | 0.112  | -0.034 | -0.156   | -0.189    | -0.351   | -0.05  |
| A021061_01 | 0.271 NA  |          | 0.157  | -0.412 | 0.197 NA |           | 0.499    | 0.345  |
| A021062_01 | -0.446    | -0.416   | -0.012 | -0.032 | -0.265   | -0.573    | 0.181    | 0.066  |
| A021063_01 | 0.237     | 0.206    | 0.148  | 0.372  | 0.045    | 0.26      | 0.138    | 0.054  |
| A021064_01 | -0.412    | -0.084   | 0.054  | 0.044  | -0.112   | -0.126    | 0.034    | 0.055  |
| A021065_01 | -0.304    | -0.014   | -0.042 | -0.043 | 0.326    | 0.931     | 0.439    | 0.459  |
| A021066_01 | -0.064    | -0.297   | 0.269  | 0.304  | 0.347    | 0.045     | 0.452 NA |        |
| A021067_01 | 0.723     | 0.653    | 0.369  | 0.561  | 0.622    | 0.538     | 0.308    | 0.239  |
| A021068_01 | -0.025    | -0.121   | -0.077 | 0.058  | -0.177   | -0.358    | -0.006   | -0.139 |
| A021069_01 | -0.446    | -0.427   | -0.281 | -0.564 | -0.231   | -0.317    | -0.15    | -0.253 |
| A021070_01 | -0.315    | -0.129   | -0.209 | -0.344 | -0.384   | -0.128    | -0.246   | 0.158  |
| A021071_01 | -0.727    | -0.425   | -0.28  | -0.429 | -0.752   | -0.224    | -0.092   | 0.276  |
| A021072_01 | -3.729    | -3.923   | -1.902 | -1.976 | -2.392   | -2.872    | -0.721   | -0.597 |
| A021073_01 | 0.056     | -0.135   | -0.1   | 0.159  | -0.044   | -0.212    | 0.069    | 0.155  |
| A021074_01 | 0.669     | 0.683    | 0.245  | 0.619  | 0.215    | 0.117     | 0.776    | 0.734  |
| A021076_01 | 0.517     | 0.642    | -0.22  | -0.197 | -0.397   | -0.16     | -0.131   | -0.244 |
| A021078_01 | 0.733     | 0.604    | -0.02  | -0.172 | -0.007   | 0.584     | 0.135    | 0.293  |
| A021079_01 | 0.195     | -0.098   | -0.1   | -0.432 | -0.065   | 0.138     | 0.012    | -0.105 |
| A021081_01 | 0.643     | 0.495    | -0.242 | -0.595 | -0.039   | -0.057    | -0.368   | -0.463 |
| A021084_01 | -0.038    | -0.064   | -0.236 | -0.046 | -0.03    | -0.01     | -0.047   | 0.036  |
| A021085_01 | 0.349     | 0.321    | 0.341  | 0.152  | 0.638    | 0.603     | -0.002   | -0.196 |
| A021086_01 | -0.561    | -0.653   | -0.42  | -0.152 | -0.118   | -0.269    | -0.016   | -0.131 |
| A021088_01 | 0.035     | 0.393    | 0.306  | 0.063  | -0.268   | -0.062    | -0.065   | -0.011 |
| A021089_01 | 0.263     | 0.146    | 0.291  | -0.126 | 0.105    | 0.047     | 0.247    | 0.128  |
| A021093_01 | 0.267     | -0.069   | 0.09   | -0.285 | 0.076    | 0.122     | 0.02     | 0.062  |
| A021094_01 | -0.055    | 0.064 NA |        | 0.025  | -0.148   | -0.073    | 0.089    | 0.431  |
| A021097_01 | -0.548    | -1.279   | -0.455 | -0.602 | -0.117   | -0.415    | -0.275   | -0.323 |
| A021099_01 | -0.076    | -0.149   | -0.025 | -0.142 | -0.11    | -0.183    | -0.104   | -0.023 |
| A021100_01 | 0.443     | 0.261    | -0.225 | 0.133  | 0.062    | -0.083    | -0.052   | -0.067 |
| A021102_01 | -0.303    | 0.066    | 0.133  | 0.093  | -0.067   | -0.081 NA |          | -0.164 |
| A021103_01 | -0.106    | 0.179    | -0.935 | -0.881 | -0.226   | -0.206    | 0.275    | 0.436  |
| A021104_01 | -0.466    | -0.162   | 0.44   | 0.328  | 0.049    | 0.04      | 0.076    | 0.352  |
| A021106_01 | -0.086    | -0.007   | -0.096 | 0.222  | -0.121   | 0.038     | -0.163   | -0.241 |
| A021107_01 | 0.703     | 0.603    | 0.357  | 0.69   | 0.13     | 0.049     | 0.165 NA |        |
| A021108_01 | 0.111     | -0.453   | 0.201  | -0.004 | 0.353    | 0.505 NA  |          | 0.552  |
| A021109_01 | 0.833     | 0.395    | 0.39   | -0.007 | 0.356    | 0.699     | 0.101    | -0.016 |
| A021110_01 | -0.182    | -0.166   | 0.205  | 0.105  | 0.12     | -0.105    | 0.111    | -0.156 |
| A021111_01 | -0.509    | -0.712   | -0.563 | -0.37  | -0.153   | -0.476    | -0.252   | -0.232 |
| A021112_01 | -0.09     | -0.043   | -0.197 | 0.374  | -0.208   | -0.057    | -0.011   | 0.14   |
| A021113_01 | 0.153     | 0.211    | 0.096  | 0.483  | 0.381    | 0.267     | 0.117    | 0.123  |
| A021117_01 | -0.234    | -0.129   | 0.018  | -0.017 | -0.122   | 0.01      | -0.177   | -0.056 |
| A021118_01 | 0.113     | 0.026    | 0.199  | -0.259 | -0.138   | -0.259    | 0.333 NA |        |
| A021119_01 | 0.399     | 0.514    | 0.012  | 0.41   | -0.094   | -0.084    | -0.138   | -0.343 |
| A021120_01 | 0.682     | 0.248    | -0.105 | -0.329 | -0.004   | 0.058     | 0.023    | 0.008  |
| A021121_01 | 0.166     | 0.172    | 0.095  | -0.192 | 0.188    | 0.165     | 0.015    | 0.14   |
| A021123_01 | 0.048     | -0.086   | -0.176 | -0.062 | 0.145    | 0.034     | -0.016   | 0.003  |
| A021124_01 | 0.198     | 0.299    | 0.561  | 0.156  | 0.067    | -0.058    | 0.218    | 0.167  |
| A021125_01 | 0.155     | 0.122    | -0.256 | -0.303 | 0.194    | 0.114     | -0.154   | -0.301 |
| A021126_01 | -0.304    | -0.278   | -0.396 | -0.468 | -0.168   | -0.077    | -0.123   | -0.164 |
| A021127_01 | 0.271     | -0.151   | 0.406  | 0.279  | 0.174    | -0.024    | 0.296    | 0.069  |
| A021128_01 | -0.162    | -0.397   | -0.136 | -0.017 | -0.031   | -0.203    | -0.064   | -0.178 |
| A021129_01 | -0.929    | -0.82    | -1.169 | -1.563 | -0.237   | -0.477    | -0.008   | 0.002  |
| A021130_01 | -0.101    | -0.034   | 0.157  | 0.093  | 0.047    | 0.481     | 0.236    | 0.238  |
| A021131_01 | 0.555     | 0.387    | 0.446  | 0.296  | 0.138    | 0.286     | 0.137    | 0.131  |
| A021132_01 | -0.604    | -0.268   | -0.309 | -0.111 | -0.189   | -0.186    | -0.436   | -0.198 |
| A021133_01 | 0.742     | 0.631    | 1.24   | 1.186  | 1.206    | 1.111     | 0.601    | 0.483  |
| A021134_01 | -0.048    | -0.302   | -0.034 | -0.33  | 0.023    | -0.113    | 0.003    | -0.15  |
| A021136_01 | -0.241    | -0.277   | 0.048  | 0.118  | -0.006   | -0.168    | 0.035    | -0.133 |
| A021137_01 | -2.983    | -3.106   | -1.487 | -1.809 | -2.038   | -2.099    | -0.38    | -0.417 |
| A021139_01 | -0.289    | -0.597   | -0.29  | 0.274  | 0.166    | -0.132 NA |          | -0.195 |
| A021140_01 | -0.282    | -0.062   | 0.059  | -0.61  | -0.035   | -0.135    | -0.031   | 0.238  |
| A021142_01 | -0.435    | -0.295   | -0.228 | -0.62  | -0.123   | -0.098    | -0.281   | -0.223 |
| A021146_01 | -0.439    | -0.325   | 0.218  | -0.032 | -0.291   | -0.336    | -0.224   | -0.11  |
| A021147_01 | -0.632    | -0.392   | 0.193  | -0.158 | -0.147   | -0.099    | -0.073   | 0.187  |
| A021148_01 | -0.845    | -0.644   | 0.286  | -0.087 | -0.124   | -0.013    | -0.055   | 0.238  |
| A021149_01 | -0.9 NA   | NA       | NA     |        | 0.048    | 0.445 NA  |          | 0.369  |

|            |        |        |        |        |        |        |        |        |
|------------|--------|--------|--------|--------|--------|--------|--------|--------|
| A021150_01 | -0.669 | -0.135 | 0.452  | 0.035  | -0.533 | -0.279 | -0.183 | 0.26   |
| A021160_01 | -0.34  | 0.231  | 0.424  | 0.126  | 0.21   | 0.25   | -0.223 | -0.071 |
| A021195_01 | -0.126 | -0.49  | -0.384 | -0.49  | -0.259 | -0.566 | -0.288 | -0.525 |
| A021200_01 | 0.355  | 0.551  | 0.7    | 0.679  | 0.078  | -0.112 | 0.133  | 0.25   |
| A021206_01 | -0.608 | -0.802 | -0.261 | -0.357 | -0.536 | -0.747 | -0.189 | -0.285 |
| A021207_01 | -0.205 | -0.398 | -0.373 | -0.091 | -0.229 | -0.321 | -0.305 | -0.345 |
| A021208_01 | -0.055 | -0.241 | -0.145 | -0.235 | 0.161  | -0.186 | -0.238 | NA     |
| A021209_01 | -0.376 | -1.05  | -0.8   | -0.624 | -0.423 | NA     | 0.088  | -0.033 |
| A021212_01 | 0.351  | 0.209  | 0.102  | -0.246 | 0.175  | -0.007 | 0.098  | -0.143 |
| A021213_01 | -0.21  | -0.319 | -0.577 | -0.03  | -0.396 | -0.591 | -0.384 | -0.413 |
| A021214_01 | -0.397 | -0.476 | -0.104 | -0.28  | -0.039 | -0.103 | 0.048  | -0.054 |
| A021218_01 | 0.075  | -0.152 | -0.321 | 0.182  | -0.226 | -0.319 | -0.22  | -0.255 |
| A021219_01 | 0.889  | 0.928  | -0.497 | -1.053 | -0.201 | 0.238  | -0.545 | -0.381 |
| A021220_01 | -0.079 | -0.194 | 0.093  | 0.058  | 0.149  | 0.065  | -0.023 | 0.034  |
| A021222_01 | 0.274  | 0.134  | -0.086 | 0.034  | 0.032  | -0.159 | -0.222 | -0.126 |
| A021223_01 | -0.882 | -0.816 | -0.43  | 0.015  | -0.309 | -0.426 | -0.216 | -0.173 |
| A021224_01 | 0.174  | 0.217  | 0.248  | 0.361  | 0.116  | 0.056  | 0.354  | 0.236  |
| A021225_01 | -0.16  | -0.342 | -0.215 | 0.07   | -0.117 | -0.37  | -0.11  | -0.142 |
| A021227_01 | -0.079 | -0.278 | 0.158  | 0.377  | -0.45  | -1.098 | -0.487 | -0.823 |
| A021230_01 | -3.876 | -4.088 | -2.65  | -3.999 | -2.334 | -3.66  | -2.987 | -1.456 |
| A021233_01 | 0.15   | 0.049  | -0.344 | 0.041  | -0.081 | -0.123 | -0.269 | -0.166 |
| A021234_01 | 0.151  | 0.012  | 0.01   | 0.145  | 0.039  | -0.07  | -0.103 | -0.122 |
| A021235_01 | 0.233  | 0.103  | -0.253 | -0.045 | 0.018  | -0.115 | 0.01   | -0.115 |
| A021238_01 | -0.73  | -0.604 | -0.275 | -0.052 | 0.05   | -0.065 | -0.191 | -0.202 |
| A021239_01 | -0.654 | -0.691 | -0.059 | -0.06  | -0.212 | -0.228 | -0.038 | -0.11  |
| A021241_01 | -0.118 | 0.122  | 0.136  | 0.192  | -0.053 | 0.046  | -0.188 | -0.069 |
| A021249_01 | -1.856 | -1.989 | -1.525 | -1.097 | -1.101 | -1.009 | -0.8   | -0.287 |
| A021252_01 | 0.26   | 0.257  | -0.116 | 0.103  | -0.086 | -0.06  | -0.378 | -0.215 |
| A021253_01 | 0.659  | 0.54   | -0.162 | 0.178  | -0.358 | -0.076 | -0.426 | -0.255 |
| A021261_01 | 0.677  | 0.568  | -0.106 | 0.045  | 0.068  | 0.015  | -0.185 | -0.248 |
| A021267_01 | 0.159  | -0.288 | -0.141 | -0.087 | -0.125 | -0.438 | -0.225 | -0.262 |
| A021269_01 | -0.239 | -0.555 | -0.281 | -0.116 | NA     | 0.02   | 0.056  | -0.027 |
| A021274_01 | 0.489  | 0.285  | 0.121  | 0.282  | 0.084  | 0.031  | -0.103 | -0.021 |
| A021276_01 | -0.189 | -0.225 | -0.142 | 0.161  | -0.087 | -0.098 | -0.105 | -0.021 |
| A021293_01 | 0.016  | 0.155  | 0.243  | 0.282  | -0.534 | -0.512 | -0.552 | -0.351 |
| A021294_01 | -0.253 | -0.361 | -0.165 | -0.121 | -0.045 | -0.026 | -0.223 | -0.115 |
| A021295_01 | 0.163  | 0.137  | 0.106  | -0.151 | -0.016 | -0.09  | -0.296 | -0.28  |
| A021299_01 | 0.201  | 0.16   | -0.261 | 0.427  | -0.379 | -0.508 | -0.864 | -0.622 |
| A021303_01 | 0.454  | 0.303  | -0.343 | -0.3   | -0.175 | -0.193 | -0.052 | 0.035  |
| A021309_01 | -0.973 | -0.894 | -1.108 | -0.215 | -0.021 | 0.049  | -0.229 | NA     |
| A021313_01 | 0.041  | -0.058 | -0.204 | -0.578 | 0.024  | 0.134  | -0.366 | -0.217 |
| A021323_01 | 0.43   | 0.355  | -0.146 | 0.49   | -0.015 | NA     | -0.038 | -0.064 |
| A021335_01 | 0.144  | -0.028 | -0.074 | 0.355  | 0.872  | 0.646  | 0.083  | -0.041 |
| A021338_01 | -0.222 | NA     | -0.051 | 0.361  | -0.422 | -0.969 | -0.457 | NA     |
| A021339_01 | -0.34  | -0.662 | NA     | -0.356 | -0.251 | -0.342 | -0.32  | -0.385 |
| A021340_01 | -0.297 | -0.664 | 0.039  | 0.09   | -0.139 | -0.128 | -0.217 | -0.083 |
| A021341_01 | -0.271 | -0.389 | -0.279 | -0.012 | -0.212 | -0.159 | -0.211 | -0.011 |
| A021342_01 | 0.408  | 0.265  | 0.54   | 0.424  | -0.113 | -0.299 | 0.375  | 0.237  |
| A021344_01 | 0.836  | 0.718  | -0.132 | 0.033  | -0.182 | 0.032  | -0.259 | -0.079 |
| A021347_01 | -0.368 | -0.595 | -0.941 | -0.54  | -0.296 | -0.134 | -0.051 | -0.014 |
| A021354_01 | -1.265 | -0.994 | NA     | NA     | -0.318 | -0.348 | -0.045 | 0.005  |
| A021368_01 | 0.228  | 0.32   | 0.407  | -0.081 | -0.063 | 0.005  | 0.051  | 0.086  |
| A021372_01 | -0.008 | 0.114  | 0.109  | -0.138 | -0.019 | 0.126  | -0.06  | 0.147  |
| A021375_01 | -0.471 | -0.375 | -0.627 | -0.201 | -0.189 | -0.115 | -0.298 | -0.182 |
| A021377_01 | -0.791 | -0.618 | -0.836 | -0.782 | -0.124 | -0.266 | -0.33  | 0.104  |
| A021389_01 | 0.262  | 0.118  | -0.354 | 0.52   | 0.079  | 0.031  | -0.41  | -0.244 |
| A021392_01 | -0.114 | -0.185 | -0.022 | 0.073  | -0.087 | -0.058 | -0.082 | -0.247 |
| A021395_01 | 0.109  | 0.097  | 0.197  | 0.181  | 0.196  | 0.455  | 0.045  | 0.108  |
| A021401_01 | -0.232 | -0.35  | -0.079 | -0.083 | 0.268  | NA     | 0.063  | -0.048 |
| A021411_01 | 0.785  | 0.668  | 0.811  | 1.376  | 0.356  | 0.087  | 0.679  | 0.518  |
| A021413_01 | 0.339  | 0.404  | -0.007 | -0.059 | 0.245  | 0.241  | -0.175 | -0.216 |
| A021419_01 | -2.479 | -2.652 | -2.401 | -2.439 | -1.146 | -1.601 | -1.74  | -1.285 |
| A021427_01 | -0.328 | -0.351 | -0.324 | -0.084 | 0.005  | 0.058  | -0.047 | -0.184 |
| A021428_01 | 0.35   | 0.151  | -0.043 | 0.398  | 0.37   | NA     | 0.053  | -0.072 |
| A021434_01 | -0.193 | 0.025  | 0.389  | 0.328  | -0.074 | -0.107 | 0.121  | 0.5    |
| A021438_01 | 0.235  | 0.063  | 0.225  | -0.019 | 0.016  | 0.11   | 0.168  | 0.129  |
| A021440_01 | -0.477 | -0.428 | -0.352 | 0.128  | -0.225 | -0.264 | -0.183 | -0.072 |
| A021441_01 | 0.129  | 0.081  | 0.001  | 0.024  | 0.195  | 0.167  | -0.366 | -0.266 |

|            |           |           |           |        |           |           |           |        |
|------------|-----------|-----------|-----------|--------|-----------|-----------|-----------|--------|
| A021444_01 | -0.581    | -0.561    | -0.357    | -0.214 | -0.364    | -0.43     | -0.152    | -0.119 |
| A021451_01 | -0.406    | -0.315    | -0.205    | -0.02  | -0.185    | -0.176    | -0.033    | 0.088  |
| A021454_01 | -0.227    | -0.586    | -0.229    | 0.362  | -0.15     | -0.411    | -0.254    | -0.217 |
| A021462_01 | 0.081     | 0.115     | -0.133    | 0.176  | 0.134     | 0.198     | -0.198    | -0.335 |
| A021464_01 | 0.492     | 0.396     | -0.138    | -0.047 | 0.567     | 0.644     | -0.229    | -0.298 |
| A021466_01 | -0.216 NA |           | -0.831    | -0.127 | -0.334 NA |           | -0.152    | -0.097 |
| A021467_01 | 0.029     | 0.303     | 0.085     | 0.12   | -0.197    | -0.331    | 0.088     | 0.087  |
| A021472_01 | 0.144     | 0.254     | -0.297    | 0.115  | -0.292    | 0.054     | -0.091    | 0.059  |
| A021474_01 | 0.122     | 0.119     | -0.112    | 0.138  | 0.172     | 0.156     | -0.165    | -0.164 |
| A021476_01 | 0.433     | 0.442     | 0.322     | 0.401  | 0.207     | 0.192     | 0.134     | -0.07  |
| A021491_01 | -0.463    | -0.511    | -0.421    | 0.283  | -0.12     | -0.157    | -0.246    | -0.151 |
| A021492_01 | -0.451    | -0.46     | -0.086    | -0.065 | -0.349    | -0.189    | -0.316    | -0.196 |
| A021494_01 | -0.034    | 0.053     | 0.218     | 0.015  | -0.217    | -0.188    | -0.315    | -0.134 |
| A021497_01 | 0.038     | -0.201    | -0.203    | 0.316  | -0.228    | -0.257    | -0.538    | -0.366 |
| A021498_01 | -0.34     | -0.564    | -0.028    | 0.148  | -0.278    | -0.297    | -0.237    | -0.173 |
| A021500_01 | 0.06      | 0.002     | -0.354    | 0.069  | -0.126    | -0.311    | -0.437    | -0.261 |
| A021510_01 | 0.301     | 0.407     | 0.033     | 0.264  | -0.296    | -0.23     | -0.332    | -0.307 |
| A021511_01 | 0.315     | 0.278     | -0.076    | 0.412  | -0.158    | 0.001     | -0.082    | -0.141 |
| A021517_01 | 0.152     | 0.275     | -0.304    | 0.073  | -0.044    | -0.083    | -0.256    | -0.257 |
| A021520_01 | -0.664    | -0.799    | -0.037    | 0.26   | 0.103     | -0.05     | -0.006    | -0.282 |
| A021521_01 | 0.616     | 0.737     | 0.335     | -0.506 | 0.451     | 0.795     | 0.344     | 0.486  |
| A021526_01 | -0.135    | -0.358    | -0.376    | 0.337  | -0.07     | -0.112    | -0.147    | -0.147 |
| A021528_01 | 0.357     | 0.203     | 0.16      | -0.27  | 0.234     | 0.005     | 0.395     | 0.413  |
| A021529_01 | -0.146    | -0.294    | -0.286    | 0.199  | -0.005    | -0.039    | -0.196    | -0.365 |
| A021538_01 | -0.943    | -0.749    | -0.178    | -0.212 | -0.332    | -0.337    | 0.34      | 0.069  |
| A021539_01 | 0.116     | 0.33      | 0.289     | 0.385  | -0.017    | 0.058     | 0.054     | -0.044 |
| A021542_01 | -0.55     | -0.353    | -0.548 NA |        | -0.163    | -0.485    | -0.256    | -0.079 |
| A021546_01 | -1.32     | -1.426    | -0.587    | -1.156 | 0.116     | -0.067    | 0.046     | 0.179  |
| A021549_01 | -0.073    | 0.056     | -0.219    | 0.137  | -0.157    | -0.138    | -0.362    | -0.328 |
| A021551_01 | -0.377    | -0.441    | -0.107    | 0.208  | -0.429    | -0.631    | -0.274    | -0.24  |
| A021552_01 | -0.012    | 0.105     | -0.269    | -0.11  | -0.075    | 0.198     | -0.232    | -0.054 |
| A021557_01 | -0.765    | -0.835 NA |           | -0.91  | -0.201    | -0.294    | -0.597    | -0.638 |
| A021560_01 | 0.104     | -0.346    | -0.208    | 0.089  | -0.146    | -0.443    | -0.144    | -0.316 |
| A021562_01 | -0.487    | -0.43     | -0.947    | -0.713 | -0.135    | 0.033     | -0.321    | -0.33  |
| A021563_01 | -0.273    | -0.385    | -0.125    | 0.137  | -0.016    | -0.207    | 0.085     | 0.077  |
| A021565_01 | 0.024     | -0.149    | -0.46     | 0.432  | 0.065     | -0.12     | -0.323    | -0.217 |
| A021567_01 | 0.087     | -0.227    | -0.357    | 0.078  | 0.284     | 0.009     | 0.043     | -0.08  |
| A021568_01 | -0.139    | -0.528    | -0.52     | -0.39  | -0.215    | -0.34     | -0.271    | -0.223 |
| A021577_01 | 0.273     | 0.185     | -0.126    | 0.254  | -0.277    | -0.347    | -0.252    | -0.25  |
| A021580_01 | -0.222    | -0.352    | -0.422    | -0.076 | -0.145    | -0.333    | -0.218    | -0.249 |
| A021585_01 | -0.216    | -0.479    | 0.06      | 0.138  | -0.069    | -0.486    | -0.175    | -0.32  |
| A021587_01 | 0.261     | 0.116     | -0.06     | 0.263  | 0.165     | 0.017     | 0.037     | -0.182 |
| A021589_01 | 0.086     | -0.034    | -0.285    | -0.525 | 0.255     | 0.265     | 0.012     | -0.042 |
| A021592_01 | -0.268    | -0.295    | 0.339     | 0.258  | -0.156    | -0.238    | 0.171     | -0.085 |
| A021593_01 | 0.332     | 0.502     | 0.487     | 0.546  | -0.288    | -0.335    | 0.094     | 0.161  |
| A021594_01 | -0.518    | -0.403    | -0.263    | -0.211 | -0.242    | -0.171    | -0.159    | -0.041 |
| A021595_01 | -2.13     | -1.776    | -2.068    | -2.458 | -1.321    | -1.255    | -1.024    | -0.758 |
| A021601_01 | 0.188     | -0.005 NA |           | 0.301  | -0.181    | -0.361    | -0.303    | -0.309 |
| A021607_01 | -0.595    | -0.798    | -0.067    | 0.061  | 0.093     | 0.029     | -0.207    | -0.269 |
| A021613_01 | -0.937    | -1.222    | -0.053    | 0.157  | -0.676    | -1.28     | -0.633    | -0.583 |
| A021615_01 | 0.185     | 0.351     | -0.102    | 0.309  | 0.16      | 0.309     | 0.134     | 0.166  |
| A021616_01 | -0.139    | -0.357    | -0.286    | 0.279  | 0.041     | -0.389 NA | NA        |        |
| A021619_01 | -0.248    | -0.42     | 0.441     | 0.349  | 0.066     | -0.285    | 0.201     | 0.086  |
| A021628_01 | -0.084    | 0.043     | 0.656     | 0.758  | 1.086     | 1.09      | 0.473     | 0.4    |
| A021629_01 | 0.016     | 0.142     | 0.507     | 0.781  | 0.813     | 0.66      | 0.157     | 0.089  |
| A021635_01 | -0.727    | -0.634    | 0.074     | -0.334 | -0.007    | 0.015     | -0.019    | 0.122  |
| A021636_01 | -0.597    | -0.5      | -0.164    | -0.096 | -0.014    | -0.356    | -0.322    | -0.273 |
| A021638_01 | -0.16     | -0.141    | -0.014    | 0.053  | -0.054    | 0.035     | -0.086    | -0.098 |
| A021640_01 | 0.492     | 0.541     | 0.18      | 0.13   | -0.108    | 0.038     | -0.038    | 0.159  |
| A021641_01 | 0.087     | -0.44     | 0.081     | 0.253  | 0.249     | 0.165     | 0.167     | 0.007  |
| A021643_01 | -0.726    | 0.045     | 0.449     | -0.126 | -0.482    | -0.051    | 0.033     | 0.402  |
| A021647_01 | 0.291     | 0.137     | -0.219    | 0.063  | -0.15     | -0.215    | -0.414    | -0.193 |
| A021648_01 | 0.447     | 0.232     | 0.072     | -0.191 | 0.089     | 0.167     | -0.008    | -0.036 |
| A021652_01 | -0.156    | -0.265    | -0.072    | 0.072  | 0.178     | 0.153     | 0.035     | -0.006 |
| A021659_01 | -0.593    | -0.352    | -0.311 NA |        | -0.041    | -0.04     | -0.234 NA |        |
| A021661_01 | -0.31 NA  |           | 0.25      | -0.104 | -0.118 NA |           | 0.138     | -0.13  |
| A021662_01 | 0.139     | 0.058     | -0.22     | 0.191  | -0.152    | -0.173 NA |           | -0.175 |
| A021670_01 | -0.275    | -0.516    | -0.83     | -0.394 | 0.128     | -0.036    | -0.271    | -0.416 |

|            |        |        |        |        |        |        |        |        |
|------------|--------|--------|--------|--------|--------|--------|--------|--------|
| A021673_01 | 0.262  | -0.168 | -0.216 | 0.13   | -0.128 | NA     | -0.134 | -0.236 |
| A021677_01 | 0.131  | -0.092 | -0.112 | 0.245  | 0.065  | -0.052 | -0.027 | -0.237 |
| A021682_01 | 0.277  | 0.101  | -0.054 | 0.101  | -0.161 | -0.25  | -0.198 | -0.326 |
| A021691_01 | 0.068  | 0.112  | 0.277  | 0.117  | 0.348  | 0.281  | 0.023  | 0.104  |
| A021696_01 | -0.028 | -0.14  | -0.329 | 0.2    | -0.062 | -0.239 | -0.178 | -0.181 |
| A021697_01 | 0.264  | 0.089  | 0.009  | 0.373  | -0.078 | -0.102 | -0.02  | -0.028 |
| A021700_01 | -0.43  | -0.537 | 0.046  | 0.189  | -0.011 | 0.032  | -0.157 | 0.045  |
| A021701_01 | 0.035  | 0.079  | 0.03   | 0.169  | -0.177 | -0.228 | -0.266 | -0.251 |
| A021703_01 | -0.06  | -0.106 | -0.021 | 0.405  | -0.032 | -0.095 | -0.44  | -0.386 |
| A021708_01 | 0.002  | -0.042 | 0.108  | 0.016  | 0.1    | NA     | 0.151  | 0.045  |
| A021709_01 | -0.701 | NA     | -0.879 | NA     | -0.394 | NA     | -0.403 | NA     |
| A021712_01 | 0.279  | 0.185  | -0.113 | 0.447  | -0.103 | -0.281 | -0.316 | -0.255 |
| A021718_01 | 1.153  | 1.025  | 1.105  | 1.487  | -0.012 | NA     | 0.234  | 0.164  |
| A021719_01 | -0.547 | -0.559 | 0.183  | 0.279  | 0.244  | 0.351  | -0.688 | -0.722 |
| A021724_01 | -0.178 | 0.136  | -0.04  | -0.55  | -0.407 | -0.01  | -0.387 | -0.115 |
| A021726_01 | -0.029 | -0.085 | -0.505 | 0.319  | -0.367 | -0.585 | -0.528 | -0.313 |
| A021730_01 | 0.081  | -0.187 | -0.167 | 0.129  | 0.169  | -0.126 | -0.388 | -0.215 |
| A021739_01 | -0.538 | -0.557 | -0.097 | 0.117  | -0.147 | -0.403 | -0.185 | -0.323 |
| A021749_01 | 0.802  | 0.976  | 0.921  | 1.388  | 0.368  | 0.203  | 0.697  | 0.408  |
| A021753_01 | 0.382  | 0.504  | 0.325  | NA     | 0.155  | 0.25   | 0.074  | NA     |
| A021759_01 | 0.532  | 0.162  | 0.312  | 0.296  | 0.559  | 0.596  | -0.089 | -0.06  |
| A021760_01 | 0.55   | 0.421  | 0.727  | 0.635  | 0.395  | 0.466  | -0.212 | -0.146 |
| A021765_01 | 0.158  | 0.047  | -0.03  | 0.097  | 0.159  | 0.087  | -0.125 | -0.206 |
| A021769_01 | 0.287  | 0.042  | -0.024 | -0.279 | -0.035 | 0.02   | -0.253 | -0.401 |
| A021771_01 | 0.229  | 0.099  | -0.084 | 0.468  | -0.22  | -0.054 | -0.297 | -0.033 |
| A021772_01 | -0.471 | -0.528 | -0.161 | 0.004  | -0.144 | 0.015  | 0.159  | 0.093  |
| A021782_01 | 0.453  | 0.371  | -0.315 | 0.333  | -0.093 | -0.322 | -0.354 | -0.243 |
| A021785_01 | 0.183  | 0.01   | -0.015 | 0.165  | -0.136 | -0.015 | -0.118 | -0.131 |
| A021786_01 | -0.662 | -0.531 | -0.157 | 0.076  | -0.225 | -0.19  | 0.034  | 0.039  |
| A021791_01 | -0.143 | -0.338 | -0.076 | 0.068  | 0.294  | -0.023 | 0.09   | -0.225 |
| A021794_01 | -0.545 | -0.668 | 0.132  | NA     | -0.811 | -1.034 | -0.026 | 0.095  |
| A021796_01 | 0.522  | 0.299  | -0.091 | 0.76   | 0.495  | 0.801  | 0.012  | -0.115 |
| A021797_01 | -0.365 | -0.685 | -0.282 | -0.167 | 0.005  | -0.249 | 0.252  | 0.114  |
| A021799_01 | -0.066 | 0.06   | -0.318 | 0.219  | -0.276 | -0.423 | -0.287 | -0.178 |
| A021802_01 | 0.345  | 0.181  | -0.481 | 0.41   | -0.087 | -0.169 | -0.343 | -0.36  |
| A021803_01 | 0.081  | -0.093 | -0.452 | 0.203  | -0.044 | 0.044  | -0.368 | -0.133 |
| A021804_01 | 0.326  | 0.386  | 0.375  | 0.101  | -0.01  | -0.17  | 0.036  | 0.032  |
| A021805_01 | -0.497 | -0.379 | -0.61  | -0.367 | -0.18  | -0.174 | -0.274 | -0.276 |
| A021807_01 | -0.799 | -0.759 | -0.218 | 0.345  | -0.039 | -0.109 | -0.311 | NA     |
| A021810_01 | -0.278 | -0.342 | -0.049 | -0.163 | -0.059 | 0.028  | -0.119 | -0.055 |
| A021811_01 | -0.254 | -0.08  | -0.109 | 0.254  | -0.369 | -0.12  | -0.331 | -0.042 |
| A021812_01 | 1.021  | 1.064  | 0.471  | 0.714  | -0.229 | -0.204 | -0.07  | NA     |
| A021813_01 | -0.796 | -0.434 | 0.16   | -0.274 | -0.027 | -0.028 | -0.221 | 0.016  |
| A021814_01 | -0.608 | -0.544 | 0.003  | -0.373 | 0.037  | -0.005 | 0.315  | 0.238  |
| A021815_01 | -0.434 | -0.351 | 0.032  | 0.311  | -0.046 | -0.225 | -0.307 | -0.162 |
| A021816_01 | -0.062 | -0.112 | NA     | NA     | -0.036 | -0.063 | -0.02  | -0.04  |
| A021817_01 | 0.132  | -0.016 | -0.027 | -0.046 | 0.222  | 0.198  | 0.016  | -0.016 |
| A021818_01 | 0.173  | 0.038  | 0.213  | 0.249  | -0.079 | -0.106 | -0.333 | -0.131 |
| A021820_01 | -1.834 | -1.935 | -1.151 | -1.511 | -0.57  | -0.691 | -0.317 | -0.299 |
| A021821_01 | -0.404 | -0.354 | -0.285 | -0.18  | -0.105 | -0.054 | -0.283 | -0.088 |
| A021822_01 | -0.554 | -0.279 | 0.517  | -0.167 | -0.294 | -0.088 | 0.037  | 0.328  |
| A021823_01 | -0.625 | -0.653 | -0.397 | -0.21  | -0.213 | -0.822 | -0.078 | -0.021 |
| A021827_01 | -0.31  | -0.299 | -0.19  | -0.238 | -0.154 | -0.247 | -0.14  | -0.173 |
| A021828_01 | 0.364  | NA     | -0.348 | -0.05  | 0.024  | NA     | -0.208 | -0.037 |
| A021829_01 | -1     | -0.862 | -0.739 | -0.346 | -1.433 | -0.711 | -0.564 | -0.191 |
| A021830_01 | 0.025  | 0.103  | 0.333  | 0.788  | -0.151 | -0.251 | -0.851 | NA     |
| A021832_01 | 0.582  | 0.156  | -0.199 | -0.212 | NA     | NA     | 0.293  | 0.123  |
| A021833_01 | 0.238  | -0.163 | 0.086  | -0.333 | 0.323  | -0.014 | -0.137 | -0.483 |
| A021835_01 | -0.227 | -0.358 | -0.375 | -0.411 | -0.287 | -0.525 | -0.525 | -0.549 |
| A021838_01 | 0.024  | 0.414  | 0.447  | 0.351  | 0.089  | 0.164  | -0.091 | 0.163  |
| A021839_01 | 0.104  | NA     | -0.067 | -0.001 | NA     | NA     | 0.331  | 0.336  |
| A021840_01 | 0.023  | 0.062  | 0.198  | 0.218  | 0.054  | -0.015 | -0.184 | NA     |
| A021842_01 | -0.174 | -0.253 | 0.269  | 0.27   | -0.192 | -0.42  | 0.268  | 0.338  |
| A021843_01 | -0.19  | -0.149 | -0.184 | -0.101 | 0.066  | 0.107  | -0.118 | -0.018 |
| A021845_01 | -0.051 | -0.175 | -0.134 | 0.22   | -0.074 | -0.15  | -0.183 | -0.211 |
| A021846_01 | 0.246  | -0.013 | -0.207 | -0.11  | 0.066  | -0.018 | 0.11   | -0.008 |
| A021848_01 | 0.135  | NA     | -0.067 | -0.28  | 0.203  | 0.429  | 0.206  | 0.115  |
| A021850_01 | -0.652 | -0.465 | 0      | -0.161 | 0.055  | 0.295  | -0.03  | 0.223  |

|            |           |        |          |        |          |          |           |        |
|------------|-----------|--------|----------|--------|----------|----------|-----------|--------|
| A021851_01 | -0.299    | -0.451 | -0.431   | -0.003 | 0.438    | 0.487    | 0.521     | 0.211  |
| A021853_01 | -0.171    | -0.107 | 0.026    | 0.079  | -0.242   | -0.138   | -0.414    | -0.19  |
| A021856_01 | 0.653     | 0.116  | -0.077   | 0.093  | 0.155    | -0.003   | -0.189    | -0.274 |
| A021857_01 | 0.355     | -0.001 | -0.051   | 0.212  | -0.007   | -0.19    | -0.358    | -0.417 |
| A021858_01 | -0.28     | -0.473 | -0.145   | 0.195  | -0.175   | -0.102   | -0.263    | -0.222 |
| A021859_01 | 0.261     | 0.272  | 0.905    | 0.921  | 0.588    | 0.547    | 0.719     | 0.397  |
| A021860_01 | 0.189     | 0.295  | -0.085   | 0.193  | 0.088    | -0.021   | -0.443    | -0.483 |
| A021864_01 | 0.268     | 0.355  | 0.546    | 0.67   | 0.098    | -0.076   | 0.144     | 0.069  |
| A021865_01 | -0.424    | -0.028 | 0.182    | -0.021 | -0.065   | 0.125    | -0.326    | 0.015  |
| A021866_01 | -0.003    | -0.049 | -0.243   | 0.047  | -0.148   | -0.168   | -0.233    | -0.144 |
| A021867_01 | -0.246    | -0.234 | 0.297    | 0.141  | 0.16     | 0.147    | -0.314    | -0.363 |
| A021868_01 | 0.097     | 0.161  | 0.121    | 0.45   | 0.229    | 0.398    | 0.236     | 0.368  |
| A021870_01 | -0.209    | -0.069 | 0.024    | 0.179  | -0.008   | -0.195   | -0.017    | 0.016  |
| A021873_01 | -0.255    | -0.349 | -0.085   | -0.242 | -0.09    | -0.082   | -0.196    | -0.279 |
| A021874_01 | -0.38     | -0.096 | -0.11    | -0.142 | -0.167   | -0.06    | -0.217    | -0.061 |
| A021876_01 | -0.089    | -0.086 | -0.16 NA |        | 0.129    | 0.118    | -0.306    | -0.246 |
| A021878_01 | -0.237    | 0.074  | 0.15 NA  |        | -0.143   | -0.171   | -0.131 NA |        |
| A021882_01 | 0.513     | 0.677  | 1.257    | 1.229  | 0.816    | 1.056    | 0.803     | 0.795  |
| A021884_01 | 0.531     | 0.321  | -0.154   | 0.322  | -0.019   | -0.038   | -0.289    | -0.171 |
| A021885_01 | 0.011     | -0.051 | -0.428   | -0.057 | 0.259    | 0.22     | -0.028    | 0.016  |
| A021888_01 | 0.569     | 0.302  | 0.227    | -0.205 | 0.196    | 0.139    | 0.276     | 0.34   |
| A021889_01 | 0.433     | 0.309  | -0.251   | 0.197  | 0.142    | 0.196    | -0.128    | -0.062 |
| A021890_01 | 0.574     | 0.602  | 0.16     | 0.787  | 0.185    | 0.417 NA |           | -0.153 |
| A021891_01 | -0.168    | -0.213 | -0.297   | 0.106  | -0.191   | -0.258   | -0.283    | -0.101 |
| A021893_01 | -2.137    | -2.518 | -2.397   | -2.708 | -1.555   | -1.981   | -1.7      | -1.198 |
| A021894_01 | -1.108    | -0.316 | -0.105   | -0.366 | -0.498   | 0        | -0.248    | 0.301  |
| A021895_01 | -0.057    | 0.016  | -0.217   | -0.006 | -0.073   | 0.201    | -0.01     | 0.108  |
| A021897_01 | -0.384    | -0.387 | -0.246   | 0.198  | -0.134   | -0.188   | 0.005     | 0.043  |
| A021898_01 | 0.314     | 0.129  | 0.514    | 0.611  | 0.39     | 0.262    | -0.013    | -0.08  |
| A021899_01 | 0.408 NA  |        | 0.258    | -0.023 | 0.023 NA |          | 0.118     | -0.151 |
| A021900_01 | 0.162     | 0.212  | 0.127    | -0.082 | 0.102    | 0.149    | 0.128     | -0.097 |
| A021901_01 | 0.408     | 0.453  | 0.269    | 0.463  | -0.054   | -0.136   | -0.008    | 0.293  |
| A021903_01 | 0.08      | -0.131 | 0.041    | 0.012  | 0.202    | -0.146   | 0.666     | 0.226  |
| A021905_01 | 0.204     | 0.237  | -0.307   | 0.052  | -0.258   | -0.06    | -0.32     | -0.118 |
| A021906_01 | -0.268    | -0.189 | 0.223    | 0.236  | -0.196   | -0.306   | -0.288    | -0.252 |
| A021907_01 | -0.603    | -0.51  | -0.076   | -0.449 | -0.055   | 0.059    | 0.035     | 0.114  |
| A021908_01 | -0.975    | -1.269 | -0.698   | -0.211 | -1.297   | -1.415   | -0.708    | -0.406 |
| A021909_01 | 0.58      | 0.334  | 0.022    | 0.28   | -0.018   | 0.065    | -0.048    | -0.212 |
| A021913_01 | -0.958    | -0.725 | -0.347   | -0.483 | -0.534   | -0.292   | -0.636    | -0.599 |
| A021915_01 | 0.081     | -0.194 | -0.093   | -0.18  | 0.115    | -0.024   | 0.125     | -0.166 |
| A021916_01 | -0.383    | -0.188 | 0.051    | 0.108  | 0.167    | 0.256    | 0.121     | 0.16   |
| A021920_01 | -0.512 NA | NA     |          | -0.638 | -0.252   | -0.454   | -0.072 NA |        |
| A021921_01 | -0.112    | -0.143 | -0.164   | -0.315 | 0.289    | 0.294    | -0.426    | -0.368 |
| A021922_01 | -0.526    | -0.666 | -0.614   | -0.426 | -0.075   | -0.093   | -0.093    | -0.047 |
| A021924_01 | -0.699    | -0.042 | 0.368    | 0.004  | -0.593   | 0.114    | -0.063    | 0.27   |
| A021926_01 | -0.367    | -0.268 | -0.039   | 0.07   | 0.058    | 0.219    | -0.094 NA |        |
| A021927_01 | -0.034    | 0.331  | 0.246    | 0.104  | 0.037    | -0.022   | -0.321    | -0.012 |
| A021928_01 | 0.013     | 0.126  | 0.419    | -0.107 | -0.093   | -0.346   | 0.33      | 0.31   |
| A021929_01 | -0.113    | 0.065  | 0.231    | -0.037 | 0.148    | 0.184    | 0.175     | 0.281  |
| A021930_01 | -0.703    | -0.952 | -0.814   | -0.274 | -1.089   | -1.173   | -0.942    | -0.79  |
| A021931_01 | 0.557     | 0.546  | -0.359   | 0.409  | -0.163   | -0.277   | -0.319    | -0.356 |
| A021932_01 | -0.068    | -0.487 | -0.232   | 0.186  | -0.095   | -0.193   | -0.314    | -0.367 |
| A021933_01 | -0.003    | -0.164 | -0.101   | 0.085  | 0.03     | -0.093   | -0.16     | -0.183 |
| A021934_01 | 0.274     | 0.151  | 0.233    | 0.639  | -0.011   | -0.194   | 0.033     | 0.073  |
| A021935_01 | 0.051     | -0.164 | -0.088   | 0.168  | 0.211    | 0.294    | 0.194     | 0.062  |
| A021937_01 | 0.64      | 0.554  | 0.812    | 0.883  | 0.713    | 0.835    | 0.988     | 0.724  |
| A021938_01 | -0.128    | -0.157 | -0.224   | 0.161  | -0.357   | -0.451   | -0.343    | -0.318 |
| A021939_01 | 0.177     | 0.084  | 0.068    | -0.059 | 0.177    | -0.02    | -0.113    | -0.131 |
| A021941_01 | -0.75     | -0.969 | -0.089   | 0.116  | -1.733   | -2.135   | -0.974    | -0.859 |
| A021942_01 | -0.361    | -0.417 | -0.989   | -0.65  | -0.016   | 0.081    | -0.329    | -0.413 |
| A021946_01 | -0.254    | -0.383 | -0.746   | -0.006 | -0.09    | -0.495   | -0.261    | -0.355 |
| A021948_01 | -0.128    | -0.066 | 0.112 NA |        | 0.155    | 0.108    | 0.095     | 0.03   |
| A021949_01 | 0.008     | 0.183  | 0.32     | 0.078  | -0.167   | -0.146   | 0.027 NA  |        |
| A021950_01 | 0.184     | -0.006 | 0        | 0.216  | 0.076    | -0.114   | -0.258    | -0.254 |
| A021951_01 | -0.362    | -0.311 | 0.13     | -0.172 | -0.086   | -0.326   | -0.026    | -0.246 |
| A021954_01 | 0.14      | -0.323 | 0.417    | 0.38   | 0.556    | 0.585    | 0.605     | 0.249  |
| A021955_01 | 0.072     | 0.229  | -0.053   | -0.183 | 0.058    | -0.018   | -0.262    | -0.154 |
| A021956_01 | 0.106     | 0.174  | 0.2      | -0.035 | 0.044    | 0.167    | 0.089     | 0.175  |

|            |          |           |          |           |           |           |           |        |
|------------|----------|-----------|----------|-----------|-----------|-----------|-----------|--------|
| A021958_01 | -0.279   | -0.259    | -0.35    | -0.209    | -0.021    | 0.173     | 0.131     | 0.314  |
| A021959_01 | -1.704   | -1.392    | -2.342   | -2.527 NA |           | -1.27     | -2.898    | -2.395 |
| A021961_01 | 0.185    | 0.162     | -0.259   | 0.123     | -0.255    | -0.075    | -0.418    | -0.119 |
| A021962_01 | -0.205   | -0.066    | -0.179   | -0.165    | -0.052    | 0.136     | -0.157    | -0.001 |
| A021963_01 | -0.816   | -0.75     | -0.233   | -0.593    | -0.234    | -0.529    | 0.189     | 0.12   |
| A021966_01 | -0.39    | -0.526    | 0.164    | -0.03     | -0.01     | -0.238    | -0.075    | -0.125 |
| A021968_01 | 0.386    | 0.431     | 0.459    | 0.581     | 0.14      | 0.513     | 0.247     | 0.475  |
| A021969_01 | -0.184   | -0.047    | -0.141   | 0.133     | -0.119    | -0.075    | -0.072    | 0.011  |
| A021970_01 | 0.255    | 0.018     | 0.279    | 0.315     | 0.264     | 0.151     | 0.151     | -0.076 |
| A021971_01 | 0.566    | 0.355     | -0.368   | 0.331     | 0.051     | -0.184    | -0.331    | -0.439 |
| A021976_01 | -3.065   | -3.717 NA | NA       |           | -2.656    | -3.619 NA |           | -2.751 |
| A021978_01 | 0.932    | 1.318     | 1.524    | 1.453     | 0.085     | 0.475     | 0.324     | 0.547  |
| A021979_01 | -2.461   | -2.748    | -3.58    | -3.941    | -2.153    | -3.004    | -2.85     | -2.255 |
| A021980_01 | -0.138   | -0.289    | 0.278 NA |           | 0.054     | -0.232    | -0.261 NA |        |
| A021981_01 | -1.117   | -0.837 NA |          | -0.272    | -0.35     | -0.249    | -0.176    | 0.001  |
| A021982_01 | 0.844    | 0.522     | 0.277    | 0.525     | 0.059     | -0.191    | -0.137    | -0.38  |
| A021983_01 | -0.357   | -0.483    | 0.172    | 0.233     | -0.265    | -0.611    | 0.033     | -0.091 |
| A021984_01 | 0.509    | 0.059     | -0.244   | 0.155     | 0.073     | 0.236     | 0.012     | -0.004 |
| A021986_01 | 0.305    | -0.1      | -0.094   | 0.081     | 0.188     | 0.04      | -0.054    | -0.194 |
| A021988_01 | 0.037    | 0.139     | 0.207    | -0.004    | 0.032     | 0.067     | 0.021     | -0.02  |
| A021989_01 | 0.202    | 0.185     | -0.097   | 0.117     | 0.016     | -0.105    | -0.183    | -0.116 |
| A021990_01 | 0.079 NA |           | -0.056   | -0.057    | -0.415 NA |           | -0.017 NA |        |
| A021992_01 | 0.209    | -0.056    | -0.201   | -0.089    | -0.031    | -0.316    | 0.039     | -0.058 |
| A021993_01 | -0.457   | -0.222    | -0.174   | 0.043     | 0.151     | 0.291     | -0.432    | -0.208 |
| A021994_01 | 0.601    | 0.283     | -0.107   | 0.118     | 0.125     | -0.14     | -0.374    | -0.301 |
| A021995_01 | -0.074   | -0.355    | -0.452   | 0.29      | 0.064     | 0.078     | 0.007     | -0.012 |
| A021997_01 | 0.484    | 0.622     | 0.161    | 0.222     | -0.43     | 0.038     | -0.201    | 0.015  |
| A021998_01 | -0.405   | -0.635    | -0.589   | -0.381    | -0.58     | -1.028    | -1.505    | -1.018 |
| A021999_01 | -0.344   | -0.572    | -0.312   | -0.195    | 0.016     | -0.173    | -0.51     | -0.462 |
| A022000_01 | 0.97     | 0.846     | 1.08     | 1.483     | 0.846     | 1.005     | -0.049    | -0.084 |
| A022001_01 | -2.666   | -3.214 NA | NA       |           | -2.197    | -3.217    | -3.303    | -2.264 |
| A022003_01 | -0.19    | -0.159    | -0.272   | 0.058     | -0.305    | -0.29     | -0.373 NA |        |
| A022005_01 | 0.063    | -0.281    | -0.275   | 0.066     | -0.037    | 0.026     | -0.01     | -0.138 |
| A022006_01 | -0.422   | -0.372    | -0.479   | -0.393    | -0.273    | -0.145    | -0.534    | -0.371 |
| A022009_01 | 0.092    | -0.103    | -0.367   | 0.171     | -0.035    | -0.149    | -0.334    | -0.353 |
| A022010_01 | 0.294    | 0.34      | -0.403   | 0.484     | -0.11     | 0.058     | -0.604    | -0.396 |
| A022011_01 | -0.077   | -0.183    | -0.368   | -0.025    | -0.415    | -0.377    | -0.087    | -0.043 |
| A022013_01 | 0.492    | 0.588     | 0.304    | 0.011     | -0.16     | 0.201     | -0.032    | 0.04   |
| A022014_01 | -0.033   | 0.003     | 0.087    | 0.079     | -0.372    | -0.262    | -0.222    | 0.026  |
| A022015_01 | -0.461   | -0.726    | -0.409   | -0.602    | -0.079    | -0.113    | -0.026    | -0.083 |
| A022018_01 | 0.303    | 0.251     | -0.369   | 0.17      | -0.278    | -0.22     | -0.367    | -0.174 |
| A022019_01 | 0.239    | 0.329     | 0.072    | 0.088     | -0.024    | 0.206     | 0.094     | 0.063  |
| A022020_01 | 0.89     | 0.733     | 0.188    | 0.304     | -0.15     | 0.496     | -0.184    | 0.019  |
| A022021_01 | 0.366    | 0.495     | -0.178   | 0.337     | -0.369    | -0.279    | -0.533    | -0.206 |
| A022022_01 | -0.017   | -0.077    | -0.092   | 0.381     | 0.217     | 0.048     | 0.221     | 0.105  |
| A022024_01 | 0.371    | 0.193     | 0.197    | 0.497     | 0.031     | 0.171     | -0.089    | -0.315 |
| A022025_01 | 0.131    | 0.013     | -0.237   | 0.205     | -0.058    | 0.169     | -0.087    | -0.078 |
| A022026_01 | 0.553    | 0.446     | -0.085   | 0.212     | -0.337    | -0.106    | -0.165    | 0.005  |
| A022027_01 | 0.341    | 0.048     | 0.337    | 0.434     | 0.358     | 0.089     | -0.047    | 0.131  |
| A022029_01 | 0.082    | 0.153     | -0.129   | -0.826    | -0.107    | 0.167     | -0.337    | -0.109 |
| A022033_01 | 0.293    | 0.056     | 0.195    | 0.421     | -0.067    | -0.252    | 0.026     | -0.077 |
| A022034_01 | 0.348    | 0.314     | -0.391   | 0.061     | -0.204    | 0.185     | -0.147    | -0.02  |
| A022038_01 | -0.084   | -0.143    | -0.213   | 0.062     | 0.097     | 0.054     | -0.149    | -0.217 |
| A022039_01 | 0.086    | 0.113     | 0.487    | 0.671     | 0.678     | 0.818     | 0.887     | 0.855  |
| A022040_01 | 0.343    | 0.174     | 0.297    | 0.551     | 0.182     | 0.136     | 0.101     | 0.006  |
| A022043_01 | 1.131    | 0.977     | 0        | 0.077     | -0.296    | 0.168     | -0.048    | 0.104  |
| A022044_01 | 0.731    | 0.5       | 0.112    | 0.03      | -0.065    | -0.063    | -0.012    | -0.071 |
| A022045_01 | -0.697   | -0.716    | -0.556   | -0.97 NA  |           | 0.034     | -0.483    | -0.235 |
| A022046_01 | 1.027    | 0.624     | 0.148    | 0         | -0.247    | 0.044     | -0.109    | -0.074 |
| A022047_01 | 0.055    | -0.126    | -0.461   | 0.05      | -0.169    | -0.461    | -0.523    | -0.372 |
| A022048_01 | -0.554   | -0.777    | -0.037   | 0.148     | -0.552    | -0.692    | 0.258     | 0.216  |
| A022077_01 | -1.455   | -1.224    | -0.399   | -0.432    | -0.593    | -0.4      | -0.258    | -0.119 |
| A022102_01 | 0.142    | -0.132    | 0.163    | -0.327    | 0.121     | -0.13     | 0.339     | 0.2    |
| A022105_01 | -0.759   | -0.46     | -0.491   | -0.565    | -0.082    | -0.054    | 0.051     | 0.081  |
| A022107_01 | 0.544    | 0.367     | 0.21     | 0.371     | -0.201    | -0.204    | -0.253    | -0.294 |
| A022112_01 | -0.855   | -0.697    | 0.166    | -0.5      | -0.064    | 0.153     | -0.133    | -0.031 |
| A022113_01 | 0.114    | 0.456     | 0.537    | 0.19      | -0.126    | 0.141     | 0.317     | 0.368  |
| A022117_01 | -0.103   | -0.094    | -0.11    | -0.18     | 0.095     | 0.111     | -0.012    | -0.002 |



|            |          |           |          |        |           |           |           |        |
|------------|----------|-----------|----------|--------|-----------|-----------|-----------|--------|
| A022118_01 | -0.316   | -0.078    | -0.003   | 0.061  | -0.2      | 0.139     | -0.062    | 0.094  |
| A022120_01 | -0.547   | -0.07     | -0.044   | -0.255 | -0.067    | 0.218     | 0.18      | 0.333  |
| A022121_01 | -0.507   | -0.237    | 0.182    | 0.324  | 0.007     | -0.13     | 0.349     | 0.359  |
| A022125_01 | 0.026    | 0.016     | -0.054   | 0.07   | 0.199     | -0.13     | -0.005    | -0.228 |
| A022126_01 | 0.016    | -0.115    | 0.957    | 0.843  | 0.364     | 0.374     | 0.008     | -0.255 |
| A022130_01 | -0.225   | -0.167    | 0.411    | 0.174  | -0.035    | -0.011    | 0.01      | -0.108 |
| A022138_01 | 0.319    | 0.334     | 0.066    | -0.636 | 0.182     | 0.122     | -0.033    | -0.141 |
| A022140_01 | -0.495   | -0.255    | 0.145    | -0.225 | -0.054    | -0.213    | -0.169 NA |        |
| A022156_01 | 0.161    | 0.12      | 0.326    | -0.345 | 0.167     | 0.061     | 0.06      | -0.036 |
| A022163_01 | 0.006    | 0.143     | 0.069    | 0.336  | 0.089     | 0.161     | -0.019    | -0.058 |
| A022164_01 | 0.7      | 0.944     | 0.172    | -0.055 | -0.011    | 0.098     | -0.176 NA |        |
| A022171_01 | 0.277    | 0.528     | 0.237    | 0.326  | 0.223     | 0.184     | -0.077    | 0.084  |
| A022183_01 | 0.168    | 0.14      | -0.147   | -0.201 | 0.266     | 0.077     | 0.032     | -0.113 |
| A022196_01 | 0.275    | 0.177     | 0.343    | -0.096 | -0.03     | -0.24     | 0.024     | -0.168 |
| A022202_01 | 0.049    | 0.077     | 0.234    | 0.748  | 0.379     | 0.234     | -0.098    | -0.067 |
| A022215_01 | -0.281   | -0.371    | -0.343   | -0.286 | -0.075    | -0.074    | -0.015    | -0.01  |
| A022218_01 | 0.332    | 0.152 NA  |          | 0.024  | 0.039     | 0.005     | -0.053    | -0.188 |
| A022230_01 | 0.06     | -0.016    | 0.109    | 0.032  | 0.229     | 0.076     | 0.133     | -0.116 |
| A022248_01 | 0.064    | -0.165    | -0.048   | -0.099 | 0.113     | 0.034     | 0.033     | -0.269 |
| A022267_01 | 0.64     | 0.352     | 0.59     | -0.154 | 0.311     | 0.204     | 0.468     | 0.16   |
| A022269_01 | -1.193   | -1.111    | -0.953   | -0.774 | -0.478    | -0.911    | 0.062     | -0.073 |
| A022275_01 | 0.48     | 0.487     | 0.303    | 0.293  | 0.23      | 0.145     | 0.326     | 0.293  |
| A022279_01 | -0.043   | -0.084    | -0.135   | 0.25   | 0.097     | 0.022     | -0.069    | -0.162 |
| A022282_01 | 0.01     | -0.193    | -0.148   | 0.217  | -0.23 NA  |           | -0.182 NA |        |
| A022283_01 | -0.172   | -0.293 NA |          | -0.435 | 0.342     | 0.199     | -0.058    | -0.236 |
| A022300_01 | 0.248    | 0.335     | 0.463 NA |        | 0.311     | 0.048     | 0.183 NA  |        |
| A022304_01 | -0.482   | -0.522    | -0.142   | -0.284 | 0.118     | -0.102    | 0.256 NA  |        |
| A022306_01 | -0.33    | -0.323    | -0.465   | -0.676 | -0.179    | -0.164 NA |           | -0.221 |
| A022311_01 | 0.237    | 0.104     | -0.414   | -0.952 | 0.02      | 0.09      | -0.149    | -0.118 |
| A022316_01 | 0.322    | 0.134     | 0.445    | 0.082  | 0.073     | -0.077    | 0.095     | 0.014  |
| A022324_01 | -0.194   | 0.258     | 0.731    | 1.036  | 0.447     | 0.814     | 0.674     | 0.508  |
| A022328_01 | 0.159    | 0.291     | -0.022   | 0.291  | -0.023    | -0.051    | -0.17     | -0.079 |
| A022329_01 | 0.158 NA |           | 0.177    | -0.098 | 0.585 NA  |           | -0.184    | -0.354 |
| A022339_01 | 0.514    | 0.444     | -0.183   | -0.024 | 0.395     | 0.306     | -0.227    | -0.376 |
| A022358_01 | -1.805   | -1.997    | -1.616   | -1.546 | -0.994    | -1.026    | -0.3      | -0.224 |
| A022365_01 | -0.251   | -0.372    | -0.761   | -0.404 | -0.167    | -0.475    | -0.359    | -0.419 |
| A022367_01 | -0.332   | -0.15     | 0.174    | 0.342  | 0.121     | 0.165     | -0.071    | -0.04  |
| A022377_01 | 0.029    | 0.031     | 0.259    | -0.124 | 0.116     | 0.04      | -0.064    | -0.029 |
| A022381_01 | 0.688    | 0.65      | 1.238    | 0.784  | 0.938     | 0.724     | 0.533     | 0.34   |
| A022386_01 | -0.199   | -0.187    | -0.33    | -0.386 | 0.164     | 0.005     | 0.012     | -0.123 |
| A022394_01 | 0.654    | 0.862     | 0.472    | -0.085 | -0.088    | 0.27      | 0.155     | 0.145  |
| A022401_01 | -0.785   | -0.749    | -0.567   | -0.408 | 0.202     | 0.418     | 0.064     | -0.126 |
| A022405_01 | -0.203   | -0.275    | -0.225   | -0.376 | 0.14      | -0.154    | -0.205    | -0.312 |
| A022406_01 | 0.208    | 0.334     | 0.381    | -0.296 | 0.069     | -0.183    | 0.14      | 0.1    |
| A022410_01 | 0.324    | -0.037    | 0.165    | -0.103 | 0.389 NA  |           | 0.257     | -0.007 |
| A022417_01 | -0.17    | -0.402    | -0.391   | 0.031  | -0.063    | -0.071    | -0.086    | -0.051 |
| A022434_01 | 0.49     | 0.172     | 0.27     | 0.227  | 0.238     | 0.035     | 0.011     | -0.155 |
| A022436_01 | -0.936   | -0.882    | 0.156    | -0.161 | -0.402    | -0.367    | -0.001    | 0.107  |
| A022444_01 | 0.283    | 0.185     | -0.141   | -0.076 | 0.014     | 0.228     | -0.238    | -0.492 |
| A022447_01 | -0.114   | -0.334    | 0.056    | 0.32   | 0.147     | -0.2      | 0.127     | 0.209  |
| A022451_01 | -0.021   | 0.142     | 0.242    | 0.469  | -0.141 NA |           | 0.014     | -0.102 |
| A022457_01 | 0.228    | 0.021     | 0.381    | 0.345  | 0.247     | 0.12      | 0.097     | -0.171 |
| A022479_01 | 0.207    | 0.121     | 0.293    | -0.149 | 0.304     | 0.208     | -0.049    | -0.094 |
| A022485_01 | 0.432    | 0.139     | -0.223   | -0.406 | 0.485 NA  |           | 0.056     | -0.181 |
| A022486_01 | 0.216 NA |           | -0.048   | -0.075 | 0.103 NA  |           | 0.049     | -0.139 |
| A022488_01 | -0.006   | -0.008    | 0.146    | -0.412 | 0.251     | 0.118     | 0.094     | -0.123 |
| A022495_01 | 0.209    | 0.051     | 0.241    | 0.441  | 0.426     | 0.14      | 0.158 NA  |        |
| A022502_01 | -0.375   | -0.39     | -0.347   | -1.062 | 0.217     | 0.074     | -0.025 NA |        |
| A022509_01 | 0.063    | -0.004    | 0.286    | -0.037 | -0.023    | 0.02      | -0.016    | -0.108 |
| A022534_01 | 0.496    | 0.074     | 0.201    | 0.112  | 0.207     | -0.062    | 0.202     | -0.02  |
| A022541_01 | 0.083    | 0.278     | 0.356    | -0.346 | 0.158     | 0.076     | 0.545     | 0.559  |
| A022543_01 | -0.513   | -1.03     | -0.351   | -0.263 | 0.761     | 0.631     | 0.146     | -0.078 |
| A022546_01 | 0.041    | -0.003    | 0.762    | 0.71   | 0.509     | 0.213     | 0.675     | 0.426  |
| A022551_01 | -0.324   | -0.509    | 0.375    | 0.154  | 0.167     | 0.195     | 0.272     | 0.17   |
| A022555_01 | 0.268    | -0.056    | -0.068   | 0.16   | 0.258     | 0.29      | 0.009     | -0.154 |
| A022556_01 | -0.984   | -1.118    | 0.221    | 0.346  | -0.05     | -0.247    | 0.139     | -0.03  |
| A022560_01 | 0.196    | 0.222     | 0.27     | 0.022  | 0.23      | 0.014     | 0.077     | -0.145 |
| A022565_01 | -0.073   | -0.106    | 0.36     | 0.347  | 0.041     | -0.285    | -0.068    | -0.062 |

|            |           |           |           |           |           |           |           |        |
|------------|-----------|-----------|-----------|-----------|-----------|-----------|-----------|--------|
| A022569_01 | -0.072 NA |           | 0.224     | -0.059 NA | NA        |           | 0.065     | -0.011 |
| A022570_01 | -1.778    | -1.894    | -0.272    | -0.187    | -0.809    | -0.93     | 0.097     | 0.273  |
| A022571_01 | 0.043     | -0.489    | -0.098    | 0.103     | 0.179     | -0.226    | 0.179     | 0.088  |
| A022583_01 | -0.431    | 0.026     | 0.397     | 0.056     | 0.358     | 0.642     | 0.4       | 0.549  |
| A022592_01 | -0.158    | -0.163    | -0.152    | -0.217    | 0.27      | -0.073    | 0.187     | 0.114  |
| A022599_01 | -0.282    | -0.521 NA | NA        |           | 0.002     | -0.447    | -0.223 NA |        |
| A022600_01 | 0.351     | 0.464     | 0.292     | 0.242     | -0.007    | 0.032     | -0.115    | -0.072 |
| A022619_01 | -1.276    | -1.841    | -0.217 NA |           | -0.127    | -0.227    | 0.327 NA  |        |
| A022624_01 | -0.434    | -0.551 NA |           | -0.168    | -0.266    | -0.355    | -0.369 NA |        |
| A022627_01 | 0.292     | 0.172     | 0.306     | -0.368    | 0.269     | 0.122     | 0.208     | 0.215  |
| A022634_01 | 0.011     | -0.125    | -0.278    | -0.384    | 0.212     | -0.101    | 0.174     | -0.011 |
| A022635_01 | -0.251    | -0.309    | 0.324     | 0.164     | -0.062    | -0.256    | 0.364     | 0.204  |
| A022637_01 | -0.232    | -0.263    | -0.71     | -0.55     | -0.097    | -0.003    | -0.363    | -0.364 |
| A022643_01 | -0.722    | -1.027    | -1.453    | -1.761    | -0.56     | -0.947    | -0.319    | -0.492 |
| A022657_01 | -0.501    | -0.688    | -0.539    | -0.88     | -0.407    | -0.692    | -0.296    | -0.339 |
| A022664_01 | 0.09      | 0.174     | -0.241    | 0.157     | 0.077 NA  |           | -0.025    | -0.2   |
| A022666_01 | 0.14      | -0.075    | 0.064     | -0.394    | -0.05     | -0.084    | 0.027     | -0.138 |
| A022671_01 | -0.267    | -0.757    | -0.119    | -0.164    | -0.003    | -0.33     | 0.002     | -0.265 |
| A022689_01 | 1.083     | 1.101     | 0.38      | 0.844     | -0.134    | -0.273    | -0.112    | -0.066 |
| A022702_01 | -0.011    | -0.13     | 0.452     | 0.428     | 0.064     | -0.184    | 0.254     | 0.06   |
| A022705_01 | -0.155    | -0.525    | 0.153     | 0.284     | 0.246     | -0.314    | 0.017     | -0.124 |
| A022708_01 | 0.203     | 0.086     | -0.267    | -0.038    | -0.056 NA |           | -0.076    | -0.144 |
| A022729_01 | -1.592 NA |           | -1.34     | -1.123    | 0.085     | -0.365    | -0.17     | -0.325 |
| A022731_01 | 0.306     | 0.354     | 0.585     | 0.464     | -0.053 NA |           | 0.393     | 0.054  |
| A022735_01 | -0.768    | -0.725    | 0.25      | 0.206     | 0.184     | 0.053     | 0.703     | 0.616  |
| A022749_01 | 0.108     | -0.229    | -0.075    | 0.061     | 0.175     | -0.284    | -0.054    | -0.271 |
| A022755_01 | 0.539     | 0.406     | 0.107     | 0.002     | 0.099     | 0.224     | -0.048    | -0.112 |
| A022764_01 | -0.191    | -0.431 NA |           | -0.135    | -0.545    | -0.954    | -0.662    | -0.583 |
| A022765_01 | -0.304    | -0.16     | -0.315    | -0.536    | -0.115    | -0.212    | -0.061    | -0.109 |
| A022779_01 | 0.405     | 0.358     | 0.716     | 0.604     | 0.063     | -0.246    | 0.127     | -0.04  |
| A022781_01 | 0.236     | 0.345     | -0.203    | -0.456    | 0.187     | 0.23      | -0.054    | -0.152 |
| A022790_01 | 0.199     | 0.285     | 0.381     | 0.114     | 0.044     | 0.042     | 0.277     | 0.191  |
| A022796_01 | -0.202    | -0.304    | -0.098    | 0.033     | 0.071     | -0.201    | -0.023    | -0.191 |
| A022801_01 | 0.003     | -0.144    | 0.191     | -0.091    | 0.053     | -0.116    | 0.225     | -0.02  |
| A022804_01 | -0.487    | -0.544    | -1.182    | -1.16     | -0.034    | -0.207    | -0.533    | -0.374 |
| A022808_01 | 0.032 NA  |           | -0.407    | -0.221    | -0.013 NA |           | -0.035    | -0.061 |
| A022817_01 | 0.189     | 0.105     | 0.148     | -0.354    | 0.298     | 0.072     | 0.076 NA  |        |
| A022821_01 | 0.434     | 0.33      | -0.318    | -0.15     | -1.945 NA |           | -2.321    | -1.918 |
| A022839_01 | 0.333     | 0.098     | 0.224     | -0.115    | 0.184     | 0.312     | 0.457     | 0.241  |
| A022844_01 | 0.661     | 0.501     | 0.255     | 0.188     | -0.083    | -0.176    | -0.018    | -0.082 |
| A022850_01 | 0.466     | 0.753     | 0.836     | 0.663     | 0.22      | 0.419     | 0.135 NA  |        |
| A022862_01 | 0.055     | 0.177     | -0.467    | -0.111    | 0.071     | 0.093     | 0.06      | 0.014  |
| A022865_01 | -0.096    | -0.099    | 0.074     | -0.114    | 0.101     | -0.068    | 0.282     | -0.022 |
| A022874_01 | 0.025     | 0.195     | -0.182    | 0.085     | 0.152     | 0.134     | -0.047    | -0.097 |
| A022882_01 | -0.176    | -0.205    | -0.266    | 0.164     | -0.247    | -0.235    | -0.181    | -0.175 |
| A022901_01 | -0.261    | -0.331 NA | NA        |           | 0.205     | 0.113     | -0.314    | -0.273 |
| A022911_01 | -0.153    | -0.284    | -0.524    | 0.184     | -0.041    | 0.071     | -0.24     | -0.22  |
| A022916_01 | 0.029     | -0.038 NA |           | -0.278    | 0.026     | -0.093 NA | NA        |        |
| A022919_01 | 0.084     | -0.093    | -0.228    | -0.098    | -0.196    | -0.35     | -0.076    | -0.109 |
| A022922_01 | -0.095    | 0.105     | 0.204     | 0.177     | 0.005     | -0.177    | -0.066    | -0.201 |
| A022927_01 | -0.106    | -0.118    | 0.093     | -0.277    | 0.03      | -0.038    | -0.028    | -0.139 |
| A022948_01 | -0.685    | -0.369    | 0.397     | -0.413    | -0.166    | -0.113    | 0.095     | 0.129  |
| A022952_01 | -0.255    | -0.296    | 0.474     | -0.097    | 0.208     | -0.159    | 0.155     | -0.01  |
| A022967_01 | -0.074    | -0.242    | -0.203 NA |           | -0.012    | -0.411    | -0.083 NA |        |
| A022968_01 | 0.047     | 0.021     | 0.045     | 0.007     | -0.009    | -0.256    | 0.043     | -0.1   |
| A022972_01 | -0.137    | -0.126    | 0.043     | -0.023    | -0.032    | -0.256    | -0.313    | -0.25  |
| A022975_01 | 0.004     | -0.073    | 0.081     | -0.144    | 0.18      | 0.075     | 0.164     | 0.077  |
| A022983_01 | 0.394     | 0.301     | -0.15     | -0.131    | 0.143 NA  |           | -0.205 NA |        |
| A022984_01 | 0.835     | 0.633     | 0.564     | 0.048     | 0.426     | 0.394     | 0.089     | -0.151 |
| A022987_01 | -0.945    | -0.59     | -0.545    | -0.659    | -0.27     | 0.162     | -0.309    | -0.041 |
| A022990_01 | 0.273     | 0.194     | 0.246     | 0.606     | 0.179     | -0.23     | -0.258    | -0.39  |
| A022991_01 | 0.196 NA  |           | 0.204     | -0.646    | 0.286 NA  |           | 0.092     | -0.023 |
| A022993_01 | -0.256    | -0.271    | -0.264    | -0.135    | -0.002    | -0.195    | 0.172     | 0.171  |
| A022996_01 | -0.461    | -0.374 NA |           | -0.344    | 0.113     | -0.297    | -0.325    | -0.372 |
| A022999_01 | -0.265    | -0.803    | 0.124     | 0.683     | -0.534    | -1.377    | -0.436 NA |        |
| A023023_01 | 0.236     | -0.028    | -0.049    | 0.098     | 0.215     | 0.109     | 0.03      | -0.181 |
| A023027_01 | -0.048    | -0.397    | 0.326     | 0.329     | -0.007    | -0.241    | 0.02      | 0.069  |
| A023029_01 | -0.222    | -0.652    | 0.186     | 0.129     | -0.281    | -0.261    | 0.458     | 0.04   |

|            |           |           |           |           |           |           |           |        |
|------------|-----------|-----------|-----------|-----------|-----------|-----------|-----------|--------|
| A023030_01 | 0.384     | 0.044     | 0.004     | 0.166     | 0.215     | 0.29      | 0.323     | 0.303  |
| A023035_01 | -0.443    | -0.357 NA | NA        |           | 0.064     | -0.417    | -0.016 NA |        |
| A023040_01 | -0.053    | 0.102     | 0.049     | -0.381    | 0.019     | -0.161    | -0.183 NA |        |
| A023041_01 | -0.308    | -0.406    | -0.343    | -0.188    | -0.246    | -0.569    | -0.24     | -0.38  |
| A023043_01 | 0.207     | 0.004     | 0.439     | -0.356 NA |           | 0.24      | 0.287     | -0.027 |
| A023045_01 | -0.412    | -0.505    | -0.198    | -0.738    | -0.095    | -0.359    | -0.11     | -0.235 |
| A023054_01 | 0.143     | 0.379     | 0.24      | 0.229     | 0.116     | 0.21      | -0.068 NA |        |
| A023061_01 | 0.031     | -0.066 NA |           | 0.393     | 0.201     | -0.113 NA |           | -0.333 |
| A023066_01 | 0.131     | -0.059    | -0.274    | 0.317     | 0.036     | -0.107    | -0.215 NA |        |
| A023075_01 | 0.526     | 0.666     | 0.654     | 0.471     | -0.036    | 0.107     | -0.016    | 0.182  |
| A023079_01 | 0.958     | 1.059     | 1.09      | 1.466     | -0.676    | -0.883    | -0.521    | -0.318 |
| A023080_01 | 0.301     | 0.283     | 0.409     | -0.366    | 0.212     | 0.249     | 0.357     | 0.141  |
| A023089_01 | -0.135    | -0.306    | -0.284    | 0.328     | 0.245     | -0.049    | 0.073 NA  |        |
| A023091_01 | 0.211     | -0.165 NA |           | -1.301 NA | NA        |           | -1.091    | -0.991 |
| A023102_01 | 0.444     | 0.362     | 0.377     | -0.152    | 0.151     | -0.024    | 0.036     | 0.006  |
| A023109_01 | 0.005     | -0.234    | 0.162     | 0.231     | 0.131     | 0.053     | 0.042     | -0.281 |
| A023113_01 | -0.44     | -0.257    | -0.221    | 0.094     | -0.143    | -0.188    | -0.135    | -0.2   |
| A023114_01 | -0.919    | -1.516    | -0.5      | -0.608    | 0.077     | 0.144     | 0.29      | 0.045  |
| A023119_01 | -0.182    | -0.102    | 0.185     | 0.129     | 0.236     | 0.285     | 0.054     | 0.019  |
| A023126_01 | -0.166    | -0.155 NA |           | -0.011    | -0.001    | -0.06     | -0.053    | -0.259 |
| A023130_01 | 0.42      | 0.148     | 0.289     | 0.136     | -0.274    | -0.728    | -0.397 NA |        |
| A023136_01 | 0.213     | 0.28      | -0.084    | -0.483    | 0.067     | 0.338     | -0.014    | -0.173 |
| A023137_01 | 0.484     | 0.351     | -0.067    | -0.144    | -0.046    | -0.06     | -0.186    | -0.149 |
| A023138_01 | -0.168    | -0.094 NA | NA        |           | -0.009    | 0.133     | -0.525 NA |        |
| A023148_01 | -0.458    | -0.453    | -0.251    | -0.497    | 0.075     | -0.079    | -0.167    | -0.106 |
| A023158_01 | -0.609    | -0.782    | 0.149 NA  |           | -0.348 NA |           | 0.069 NA  |        |
| A023159_01 | -0.091    | -0.356    | 0.008     | -0.091    | -0.09     | 0.026     | -0.047    | -0.062 |
| A023163_01 | 0.551     | 0.543     | 0.347 NA  |           | 0.241     | 0.03      | 0.196     | -0.099 |
| A023177_01 | -0.372    | -0.374    | 0.107     | -0.157    | -0.062    | -0.228    | -0.128    | -0.16  |
| A023183_01 | 0.435     | 0.326     | 0.084     | -0.311    | -0.024    | 0.141     | 0.13      | 0.067  |
| A023185_01 | 0.23      | 0.045     | -0.003    | -0.224    | 0.258     | 0.097     | 0.118     | -0.143 |
| A023186_01 | 0.208     | -0.118    | 0.077     | -0.497    | 0.167     | 0.23      | 0.102     | -0.121 |
| A023188_01 | 0.468     | 0.208     | 0.448     | -0.213    | 0.226     | 0.262     | -0.037    | -0.047 |
| A023198_01 | -0.065    | -0.313    | 0.555     | 0.416     | 0.016     | -0.439    | 0.357     | -0.026 |
| A023199_01 | -1.647 NA |           | -0.554    | -0.408    | -0.535    | -1.341    | -0.003    | -0.118 |
| A023202_01 | 0.708     | 0.496     | 0.326     | 0.092     | 0.327     | 0.177     | 0.319     | 0.115  |
| A023223_01 | 0.612     | 0.284     | 0.305     | -0.716    | 0.133 NA  |           | 0.014     | -0.045 |
| A023228_01 | -0.072    | -0.325    | -0.628    | -0.778    | -0.206    | -0.371    | -0.19     | -0.474 |
| A023230_01 | 0.363     | 0.326     | 0.147     | -0.091    | -0.016    | 0.25      | 0.14      | 0.086  |
| A023232_01 | 0.683 NA  |           | 0.076     | -0.411    | 0.274 NA  |           | -0.232 NA |        |
| A023237_01 | 0.084     | -0.166    | -0.235    | 0.113     | -0.515    | -0.107    | -0.062 NA |        |
| A023239_01 | 0.047     | -0.063    | 0.286     | 0.304     | 0.237     | -0.076    | 0.582     | 0.349  |
| A023241_01 | -0.15     | -0.042    | -0.029    | 0.015     | -0.046    | -0.297    | -0.17     | -0.099 |
| A023242_01 | -0.054    | -0.353    | -0.458    | -0.606    | 0.443     | 0.8       | -0.134    | -0.044 |
| A023250_01 | -0.752    | -0.04     | 0.273     | -0.02     | -0.428    | 0.067     | -0.227    | 0.464  |
| A023252_01 | -0.047    | -0.27     | -0.758    | -1.208    | 0.244     | 0.193     | 0.052     | -0.072 |
| A023259_01 | -0.346    | -0.327    | -0.146    | -0.415    | 0.075     | 0.166     | -0.129    | -0.212 |
| A023272_01 | -0.274    | -0.376    | -0.66     | -0.569    | -0.106    | -0.172    | -0.616    | -0.64  |
| A023277_01 | -0.907    | -1.075    | -0.741    | -0.944    | -0.465    | -0.679    | -0.363    | -0.412 |
| A023279_01 | 0.497     | 0.736     | 0.316     | -0.384    | 0.289     | 0.431     | 0.346     | 0.182  |
| A023283_01 | -0.225    | -0.134    | -1.095 NA |           | -0.213 NA |           | -0.426 NA |        |
| A023287_01 | 0.775     | 0.487 NA  |           | -0.598    | 0.389 NA  |           | 0.161     | -0.01  |
| A023290_01 | -0.073    | -0.365 NA |           | 0.03      | 0.135     | -0.026    | 0.082     | -0.129 |
| A023297_01 | 0.048     | 0.093     | -0.063    | -0.173    | -0.268    | -0.521    | -0.401 NA |        |
| A023312_01 | -0.621    | -0.585 NA |           | -0.463    | -0.224    | -0.384    | -0.328    | -0.284 |
| A023324_01 | 0.444     | 0.359     | 0.515     | 0.73      | 0.047     | -0.072    | 0.345     | 0.363  |
| A023329_01 | -0.038    | -0.189    | 0.044 NA  |           | 0.33      | 0.134     | 0.026     | -0.094 |
| A023335_01 | -0.357    | -0.396    | -0.347    | -0.056    | 0.189     | -0.039    | 0.376     | 0.264  |
| A023339_01 | -0.133    | 0.015     | -0.098    | -0.245    | 0.052     | -0.019    | -0.076    | 0.101  |
| A023346_01 | 0.063     | 0.054 NA  |           | 0.171     | 0.164     | 0.09 NA   |           | 0.001  |
| A023347_01 | 0.521     | 0.089     | 0.013     | 0.131     | 0.205     | -0.126    | -0.045    | -0.154 |
| A023348_01 | -0.312    | -0.607    | 0.072     | 0.09 NA   | NA        |           | 0.241     | 0.142  |
| A023353_01 | -0.051    | -0.122    | 0.218     | -0.49     | 0.157     | 0.182     | 0.019     | -0.047 |
| A023354_01 | -1.09     | -0.836    | -0.299    | -0.832    | 0.045     | 0.016     | 0.241     | 0.102  |
| A023363_01 | -0.265    | -0.323    | 0.094     | -0.14     | -0.075    | -0.293    | -0.07     | -0.062 |
| A023376_01 | 1.019     | 0.647     | 0.967     | 0.223     | -0.153    | 0.262     | 0.2       | 0.179  |
| A023378_01 | 0.473     | 0.406     | 0.388     | 0.252     | 0.221     | 0.076     | -0.062    | 0.017  |
| A023386_01 | -0.257    | -0.293    | -0.761    | -0.64     | -0.172    | -0.305    | -0.296    | -0.291 |

|            |           |           |           |          |           |           |           |        |
|------------|-----------|-----------|-----------|----------|-----------|-----------|-----------|--------|
| A023389_01 | -0.2 NA   |           | -0.213    | 0.131    | -0.005 NA |           | -0.3      | 0.117  |
| A023404_01 | -0.862    | -1.126 NA |           | -0.427   | 0.064     | 0.101     | 0.292 NA  |        |
| A023424_01 | -0.104    | -0.205    | -0.073    | -0.51    | 0.01      | 0.019     | 0.155     | 0.105  |
| A023428_01 | 0.567     | 0.357     | 0.338     | 0.255    | 0.04 NA   |           | 0.289     | 0.236  |
| A023431_01 | -0.748    | -0.942    | 0.234     | 0.106 NA |           | -0.768    | 0.413     | 0.307  |
| A023433_01 | -1.234 NA | NA        |           | -0.942   | -0.147    | -0.495    | -0.074    | -0.03  |
| A023440_01 | -0.521    | -0.67     | -0.642    | -0.764   | -0.266    | -0.337    | -0.271    | -0.316 |
| A023441_01 | -0.134    | -0.481    | -0.003    | -0.268   | 0.142     | -0.379    | -0.013    | -0.186 |
| A023443_01 | 0.096 NA  |           | -0.189    | 0.064    | 0.084 NA  |           | -0.072    | -0.157 |
| A023453_01 | -0.275    | -0.125 NA |           | -0.264   | -0.154    | -0.227    | -0.229    | 0.027  |
| A023457_01 | 0.519     | 0.512     | -0.097    | -0.222   | -0.119    | 0.026     | -0.051    | 0.012  |
| A023470_01 | -0.006    | 0.054     | 0.459     | 0.282    | 0.143     | 0.055     | 0.254 NA  |        |
| A023473_01 | 0.312 NA  |           | 0.124     | 0.204    | -0.078 NA |           | 0.009     | -0.013 |
| A023476_01 | 0.314     | 0.159     | 0.346     | 0.478    | -0.003    | -0.319    | 0.116 NA  |        |
| A023491_01 | -0.253    | -0.507    | -0.172    | -0.601   | -0.003    | -0.11     | 0.037     | -0.138 |
| A023504_01 | -0.361    | -0.334    | -1.66     | -1.296   | -0.092    | -0.171    | -0.728    | -0.737 |
| A023507_01 | -0.38     | -0.116    | -0.052    | 0.293    | -0.519    | -0.422    | 0.066     | 0.269  |
| A023523_01 | -0.291    | -0.34     | -0.264    | -0.293   | 0.134     | -0.153    | -0.232    | -0.035 |
| A023537_01 | 0.138     | -0.207    | -0.076    | -0.604   | 0.779     | 0.998     | -0.085    | -0.119 |
| A023546_01 | 0.455     | 0.371     | 0.194     | 0.064    | 0.21      | -0.272    | -0.036    | -0.035 |
| A023566_01 | -0.135    | -0.054    | -0.059    | -0.243   | 0.226     | 0.127     | -0.116    | -0.199 |
| A023589_01 | 0.009     | -0.064    | 0.301     | -0.03    | 0.063     | -0.11     | 0.189     | 0.139  |
| A023607_01 | -0.19     | -0.437    | 0.199 NA  |          | 0.164     | -0.009    | 0.277 NA  |        |
| A023609_01 | 0.151     | 0.595     | 0.39      | 0.26     | 0.272     | 0.344     | 0.236     | 0.281  |
| A023620_01 | -0.587    | -0.497    | -0.947    | -1.268   | -0.26     | -0.248    | -0.554    | -0.29  |
| A023621_01 | 0.074     | 0.111     | 0.293     | -0.432   | 0.085     | 0.065     | -0.093    | -0.075 |
| A023622_01 | -0.008    | -0.106    | -0.022    | 0.027    | 0.087     | -0.146    | -0.017    | -0.193 |
| A023623_01 | 0.688     | 0.266     | 0.574     | 0.51     | 0.168     | 0.173     | 0.254     | 0.114  |
| A023629_01 | -0.059    | -0.301    | 0.068     | 0.193    | -0.112    | -0.41     | 0.227 NA  |        |
| A023630_01 | -0.026    | -0.147    | 0.128     | 0.442    | 0.337     | 0.269     | 0.053     | -0.007 |
| A023652_01 | -0.24     | -0.349    | 0.146 NA  |          | 0.306     | 0.075     | 0.265 NA  |        |
| A023658_01 | 0.668     | 0.572     | 0.151     | 0.389    | 0.481     | 0.379     | 0.443     | 0.304  |
| A023665_01 | 0.101     | 0.281     | 0.203     | 0.023    | 0.274     | 0.118     | -0.072    | -0.056 |
| A023672_01 | 0.032     | 0.035     | 0.146     | 0.317    | 0.014     | -0.187    | -0.2      | -0.151 |
| A023685_01 | 0.048 NA  |           | -0.259    | -1.08    | 0.35 NA   |           | 0.041     | -0.093 |
| A023689_01 | -0.443    | -0.568 NA | NA        |          | -0.124    | -0.348 NA | NA        |        |
| A023712_01 | 0.496     | 0.524     | 0.104     | -0.342   | 0.037     | 0.296     | -0.059    | 0.037  |
| A023721_01 | -3.143    | -3.31 NA  | NA        |          | -1.134    | -1.265    | 0.175     | 0.123  |
| A023735_01 | 0.259     | 0.218     | 0.198     | 0.184    | 0.285     | -0.138    | -0.161 NA |        |
| A023745_01 | 0.711     | 0.544     | 0.067     | -0.652   | 0.327     | 0.388     | 0.284     | -0.008 |
| A023754_01 | -0.21     | -0.198    | -0.148    | 0.131    | -0.125    | -0.275    | -0.236    | -0.084 |
| A023756_01 | 0.479     | 0.703     | 0.612     | 0.939    | -0.177    | -0.198    | 0.042     | -0.002 |
| A023760_01 | 0.28      | 0.115     | 0.374     | 0.17     | -0.073    | -0.209    | 0.253     | 0.195  |
| A023776_01 | 0.69      | 0.544     | -0.36     | -0.278   | 0.414     | 0.312     | -0.068    | -0.015 |
| A023797_01 | -0.042    | -0.046    | 0.098     | 0.167    | 0.011     | 0.142     | 0.255 NA  |        |
| A023802_01 | -0.717    | -0.795    | -1.031 NA |          | -0.396    | -0.383    | -0.615 NA |        |
| A023806_01 | 0.601     | 0.567     | 0.324     | -0.037   | 0.162     | 0.287     | 0.084     | -0.005 |
| A023808_01 | 0.172     | 0.046     | 0.233     | 0.368    | 0.091     | -0.018    | 0.055     | -0.038 |
| A023814_01 | -0.436    | -0.231    | -0.407    | -0.217   | -0.424    | -0.242    | -0.303    | -0.102 |
| A023818_01 | 0.089 NA  |           | 0.069 NA  |          | -0.52 NA  |           | -0.453    | -0.365 |
| A023824_01 | 0.517     | 0.384     | 0.307     | -0.202   | -0.101    | 0.045     | 0.147     | 0.019  |
| A023852_01 | -0.143    | -0.145    | -0.399    | -0.317   | -0.011    | -0.138    | -0.125    | -0.398 |
| A023870_01 | -0.895    | -0.872    | -0.649    | -0.462   | -0.15     | -0.227    | 0.019     | -0.062 |
| A023876_01 | -0.147    | -0.119    | -0.242    | -0.431   | -0.208    | -0.254    | -0.012    | 0.051  |
| A023896_01 | -0.217    | -0.33     | -0.399 NA |          | 0.095     | -0.017    | -0.367 NA |        |
| A023897_01 | -0.123    | 0.093     | 0.006     | -0.113   | -0.049    | -0.18     | -0.157    | -0.126 |
| A023902_01 | -0.118    | -0.098    | 0.285     | 0.356    | 0.158     | -0.084    | -0.038 NA |        |
| A023904_01 | 0.241     | 0.574     | 0.731     | 0.808    | 0.49      | 0.673     | 0.265     | 0.359  |
| A023913_01 | 0.373     | 0.186     | 0.742     | 0.888    | 0.587     | 0.332     | 0.663     | 0.238  |
| A023941_01 | 0.745     | 1.382     | 1.087     | 0.671    | 0.892     | 1.132     | 0.273     | 0.451  |
| A023943_01 | -0.204    | -0.639    | -0.162    | -0.131   | 0.131     | -0.28     | 0.109     | 0.028  |
| A023982_01 | 0.686     | 0.752     | 0.603     | 0.142    | 0.082 NA  |           | 0.03      | -0.136 |
| A023987_01 | 0.495     | 0.118     | 0.412     | 0.119    | 0.31      | 0.017     | 0.002     | -0.275 |
| A023993_01 | 0.604     | 0.626     | 0.362     | -0.01    | 0.355     | 0.348     | 0.164     | -0.085 |
| A023994_01 | -0.266    | -0.111 NA |           | 0.068    | 0.263     | -0.02     | 0.481     | 0.522  |
| A023999_01 | 0.14      | -0.171    | 0.583 NA  |          | 0.161     | -0.099    | 0.046     | -0.22  |
| A024001_01 | 0.478     | 0.137     | 0.253     | 0.444    | 0.228 NA  |           | 0.198     | -0.159 |
| A024024_01 | 0.221     | 0.208     | 0.644     | 0.357    | 0.403     | 0.156     | 0.092     | 0.131  |

|            |           |           |        |           |           |        |           |        |
|------------|-----------|-----------|--------|-----------|-----------|--------|-----------|--------|
| A024026_01 | -0.427    | -0.773    | -0.444 | -0.773    | -0.084    | -0.313 | 0.226     | 0.247  |
| A024027_01 | -0.038    | -0.318 NA |        | -0.092    | 0.135     | -0.184 | -0.027    | -0.155 |
| A024030_01 | -0.083    | -0.143    | 0.101  | -0.113    | 0.313     | 0.051  | 0.017     | -0.012 |
| A024035_01 | -0.176    | -0.224    | -0.125 | 0.066     | 0.021     | -0.102 | -0.38     | -0.248 |
| A024038_01 | -3.651    | -4.021    | -1.805 | -2.108    | -3.19     | -3.168 | -1.118    | -0.619 |
| A024039_01 | -2.492    | -3.27     | -1.783 | -1.686    | -2.069    | -2.778 | -0.885    | -0.648 |
| A024040_01 | 0.021     | -0.269    | -0.145 | -0.094    | -0.048    | -0.485 | -0.1 NA   |        |
| A024042_01 | -0.086 NA |           | -0.2   | 0.261     | 0.108 NA  |        | -0.176    | -0.238 |
| A024046_01 | -0.302    | -0.265    | -0.105 | -0.29     | 0.018 NA  |        | 0.053 NA  |        |
| A024056_01 | 0.118     | 0.033     | 0.192  | -0.62     | 0.118     | 0.148  | 0.18      | 0.036  |
| A024063_01 | -0.46     | -0.565    | -0.872 | -0.231    | -0.251    | -0.119 | -0.259    | -0.032 |
| A024067_01 | -0.484    | -0.418    | -0.001 | -0.065    | -0.216    | -0.04  | 0.002     | -0.027 |
| A024071_01 | -0.312 NA | NA        |        | -0.018    | -0.014 NA |        | -0.061    | -0.042 |
| A024074_01 | -0.457    | -0.586    | -0.194 | 0.159     | 0.181     | -0.037 | 0.216     | -0.144 |
| A024084_01 | 0.08      | 0.142     | -0.048 | 0.094     | -0.06     | -0.151 | -0.105    | -0.203 |
| A024086_01 | 0.331     | 0.131     | 0.203  | 0.028     | -0.064    | 0.139  | -0.128    | 0.047  |
| A024089_01 | -0.009    | -0.274    | -0.136 | -0.098    | -0.056    | -0.305 | -0.164    | -0.403 |
| A024092_01 | -0.714    | -0.966    | -0.786 | -0.97     | -0.569    | -0.577 | -0.389    | -0.401 |
| A024099_01 | -0.018    | -0.138    | 0.333  | 0.194     | 0.295     | 0.216  | -0.025    | -0.101 |
| A024101_01 | 0.393     | 0.358     | 0.514  | 0.441     | -0.146    | -0.401 | -0.199    | -0.138 |
| A024105_01 | 0.161     | 0.098     | -0.2   | 0.12      | -0.106    | -0.088 | -0.239    | -0.232 |
| A024106_01 | 0.023     | -0.05     | 0.31   | -0.028    | 0.117     | -0.138 | 0.106     | -0.162 |
| A024107_01 | -0.27     | -0.521    | -0.264 | -0.361    | -0.001    | -0.156 | -0.004    | -0.134 |
| A024109_01 | -0.345    | -0.238 NA | NA     |           | 0.188     | 0.065  | -0.201 NA |        |
| A024112_01 | -0.308    | -0.176    | -0.253 | 0.094     | -0.09     | -0.072 | -0.376    | -0.227 |
| A024113_01 | 0.88      | 0.677     | 0.441  | 0.512     | 0.02      | 0.19   | 0.286     | 0.053  |
| A024114_01 | 0.029     | 0.007     | -0.304 | -0.278    | 0.108     | 0.083  | -0.488    | -0.487 |
| A024115_01 | 0.029     | 0.063     | 0.063  | -0.138    | 0.068     | -0.064 | -0.043    | -0.011 |
| A024116_01 | 0.293     | 0.374     | -0.029 | -0.627    | 0.078     | 0.096  | 0.095     | -0.003 |
| A024118_01 | 0.321     | -0.111    | 0.294  | -0.203    | -0.007 NA |        | 0.075     | 0.144  |
| A024123_01 | 0.017     | -0.254    | -0.482 | -0.34     | 0.073     | -0.169 | -0.253    | -0.332 |
| A024128_01 | -0.004    | 0.342     | 0.228  | 0.188     | -0.022    | 0.173  | -0.037    | 0.071  |
| A024151_01 | 0.083     | -0.178    | -0.252 | 0.246     | 0.063 NA  |        | -0.042    | -0.111 |
| A024153_01 | -0.176    | -0.031    | 0.575  | 0.106     | -0.008    | -0.198 | 0.018     | 0.023  |
| A024157_01 | -0.111    | -0.315    | -0.39  | -0.374    | 0.356     | -0.006 | 0.3 NA    |        |
| A024160_01 | -0.258    | -0.704    | -0.514 | -0.388    | -0.201    | -0.359 | -0.167    | -0.344 |
| A024161_01 | 0.133     | -0.003    | -0.01  | -0.022    | 0.048     | -0.092 | 0.03      | -0.045 |
| A024166_01 | 0.336     | 0.174 NA  |        | 0.057 NA  |           | -0.073 | -0.007    | -0.244 |
| A024169_01 | -0.475    | 0.194     | 0.31   | -0.076    | -0.349    | -0.098 | -0.266    | 0.124  |
| A024172_01 | 0.65      | 0.516     | 0.267  | 0.221     | 0.167     | 0.045  | 0.002     | -0.115 |
| A024173_01 | 0.054     | 0.057     | -0.145 | -0.071    | 0.172     | 0.163  | -0.108    | -0.194 |
| A024174_01 | 0.614     | 0.404     | 0.253  | 0.315     | -0.003    | -0.172 | -0.064    | -0.088 |
| A024175_01 | 0.668     | 0.542     | 0.377  | -0.464    | 0.321     | 0.132  | 0.244     | 0.02   |
| A024176_01 | -0.529    | -0.134 NA |        | 0.159     | -0.447    | -0.185 | -0.221    | 0.168  |
| A024180_01 | 0.127     | 0.151     | 0.453  | 0.169     | 0.261     | 0.244  | 0.052     | -0.092 |
| A024181_01 | 0.166     | 0.06      | -0.292 | -0.235    | 0.149     | -0.001 | -0.106    | -0.325 |
| A024182_01 | -0.28     | -0.42     | -0.197 | -0.867    | 0.072     | -0.012 | -0.492    | -0.529 |
| A024183_01 | -0.631    | -0.539    | -0.62  | -0.938    | -0.05     | -0.075 | -0.086    | -0.115 |
| A024184_01 | 0.568     | 0.367     | 0.059  | -0.083    | 0.224     | 0.017  | -0.05     | -0.264 |
| A024187_01 | 0.039     | 0.112     | -0.031 | -0.163 NA |           | 0.127  | 0.001     | -0.02  |
| A024188_01 | -0.617    | -0.547    | -0.239 | -0.38     | -0.352    | -0.148 | 0.013 NA  |        |
| A024191_01 | -0.297    | -0.361    | 0.07   | 0.128     | -0.006    | -0.215 | -0.015    | -0.095 |
| A024192_01 | -0.163    | 0.108     | 0.048  | -0.212    | 0.165     | 0.202  | -0.364    | -0.162 |
| A024193_01 | 0.836     | 0.291     | 0.256  | -0.77     | 0.321     | 0.628  | 0.103     | 0.006  |
| A024195_01 | -0.534    | -0.439    | -0.109 | -0.767    | 0.053     | 0.112  | 0.293     | 0.16   |
| A024196_01 | -0.229 NA |           | 0.154  | 0.322     | 0.007 NA  |        | 0.072     | -0.018 |
| A024197_01 | 0.381     | 0.19      | 0.26   | -0.002    | 0.25      | 0.057  | 0.211     | 0.055  |
| A024199_01 | 0.639     | 0.483     | 0.419  | -0.829    | 0.329     | 0.46   | 0.39      | 0.196  |
| A024201_01 | 0.103     | -0.385    | -0.143 | 0.137     | 0.129     | -0.334 | -0.059    | -0.192 |
| A024207_01 | 0.36      | 0.336     | -0.229 | -0.536    | 0.106     | 0.129  | 0.001     | -0.044 |
| A024209_01 | 0.139     | 0.219     | 0.04   | -0.344    | 0.017     | 0.243  | -0.033    | 0.085  |
| A024211_01 | 0.095     | 0.274     | 0.251  | -0.472    | 0.151     | 0.189  | -0.067    | 0.145  |
| A024212_01 | 0.171     | 0.156     | 0.06   | 0.242     | 0.129     | 0.165  | 0.02      | -0.081 |
| A024214_01 | -0.027 NA |           | -0.231 | -0.245    | 0.014 NA  |        | -0.154    | -0.248 |
| A024215_01 | -0.118    | -0.116    | 0.064  | 0.12      | 0.133     | 0.145  | 0.207     | 0.254  |
| A024219_01 | -0.015    | -0.028    | 0.341  | -0.326    | 0.412     | 0.483  | 0.648     | 0.446  |
| A024220_01 | 0.938 NA  |           | -0.138 | -0.118    | 0.18 NA   |        | 0.039     | -0.051 |
| A024222_01 | 0.361     | 0.151     | 0.234  | 0.223     | 0.225     | 0.357  | 0.007     | -0.029 |

|            |           |           |           |           |           |        |           |        |
|------------|-----------|-----------|-----------|-----------|-----------|--------|-----------|--------|
| A024223_01 | -0.114    | -0.167    | 0.136     | 0.197     | 0.012     | -0.24  | 0.084     | -0.106 |
| A024224_01 | 0.336     | 0.349     | 0.31      | -0.141    | -0.09     | 0.015  | 0.015     | 0.051  |
| A024226_01 | 0.015     | -0.251    | 0.415     | 0.281     | 0.373     | 0.126  | 0.549     | 0.282  |
| A024227_01 | 0.637     | 0.494     | 0.288     | -0.303    | 0.498     | 0.315  | 0.669     | 0.418  |
| A024228_01 | -0.427    | -0.54 NA  | NA        |           | -0.082    | -0.334 | -0.011    | -0.173 |
| A024229_01 | 0.317     | 0.052     | 0.214     | -0.442    | 0.297     | 0.237  | 0.122     | -0.003 |
| A024230_01 | -0.862    | -1.438    | -0.712    | -0.795    | -0.05     | -0.296 | 0.091     | -0.308 |
| A024232_01 | -0.062    | 0.259     | -0.305    | 0.018     | 0.023     | -0.007 | -0.406    | -0.346 |
| A024235_01 | -0.372    | -0.215    | 0.043 NA  |           | 0.045     | -0.064 | -0.082    | -0.099 |
| A024236_01 | -0.297    | -0.383    | 0.074     | 0.172     | -0.22     | -0.54  | -0.028    | -0.116 |
| A024237_01 | -0.216    | 0.051     | 0.285     | 0.194     | -0.131    | -0.205 | -0.082    | 0.134  |
| A024239_01 | -0.15     | 0.046     | 0.08      | -0.154    | 0.063     | -0.096 | -0.128    | -0.078 |
| A024241_01 | 0.41 NA   |           | 0.222     | 0.138 NA  | NA        |        | 0.096     | -0.398 |
| A024242_01 | -0.185    | -0.065    | -0.078    | 0.264     | -0.1      | -0.146 | -0.249    | -0.185 |
| A024243_01 | 0.444     | 0.135     | -0.026    | -0.543    | 0.067     | -0.112 | 0.02      | -0.054 |
| A024246_01 | 0.277     | 0.227     | 0.198     | -0.227    | 0.204     | 0.104  | 0.074     | 0.109  |
| A024247_01 | 0.386     | 0.278     | 0.316     | -0.481    | 0.071     | 0.014  | 0.075     | -0.253 |
| A024248_01 | -1.461    | -1.728    | -0.605    | -0.716    | -1.243    | -1.591 | -0.322    | -0.395 |
| A024249_01 | 0.231     | 0.051     | 0.24      | -0.145    | 0.441     | 0.316  | 0.423     | 0.147  |
| A024250_01 | -1.015    | -0.451    | -0.085    | -0.449    | -0.638    | -0.111 | 0.004     | 0.356  |
| A024251_01 | -0.023    | 0.126     | -0.407    | -0.211    | 0.162     | 0.125  | -0.038    | -0.166 |
| A024253_01 | -0.106    | -0.314    | -0.005    | -0.171    | -0.02     | -0.189 | 0.096 NA  |        |
| A024255_01 | -0.696    | -0.562    | 0.233     | 0.137     | -0.188    | -0.14  | 0.427     | 0.311  |
| A024257_01 | -0.475    | -0.488    | -0.453    | 0.055     | -0.119    | -0.226 | -0.139    | -0.107 |
| A024258_01 | -0.015    | 0.068     | -0.081    | -0.041    | 0.003     | -0.007 | 0.082     | -0.043 |
| A024259_01 | 0.899     | 0.726     | 1.695     | 1.378     | 1.235     | 1.335  | 1.071     | 0.861  |
| A024261_01 | -0.37     | 0.187     | 0.181     | 0.079     | 0.213     | 0.325  | -0.29     | 0.093  |
| A024262_01 | 0.407 NA  |           | 0.322     | 0.289     | 0.274 NA  |        | 0.26      | 0.142  |
| A024268_01 | -0.307 NA |           | 0.088     | 0.051     | -0.008 NA |        | -0.017    | -0.094 |
| A024270_01 | 0.133 NA  |           | -0.025    | -0.198    | -0.052 NA |        | -0.081    | 0.108  |
| A024271_01 | -0.333    | -0.332    | 0.024     | 0.052     | -0.075    | -0.111 | -0.06     | -0.224 |
| A024272_01 | 0.177     | 0.088     | 0.641     | 1.099     | 0.057     | -0.214 | 0.133     | -0.121 |
| A024274_01 | -0.369    | -0.412    | -0.448    | -0.025    | -0.294    | -0.364 | -0.086    | -0.072 |
| A024276_01 | 0.233     | 0.212     | 0.253     | 0.227     | 0.379     | 0.397  | 0.139     | -0.03  |
| A024279_01 | -0.722    | -0.613 NA | NA        |           | -0.021 NA |        | 0.269     | 0.05   |
| A024280_01 | -0.168 NA |           | -0.383 NA |           | -0.076 NA |        | -0.066 NA |        |
| A024282_01 | -0.025    | -0.161    | -0.215    | 0.207     | -0.278    | -0.283 | -0.143    | -0.167 |
| A024284_01 | -0.256    | -0.423    | -0.365    | -0.259    | 0.206     | 0.042  | -0.173    | -0.28  |
| A024286_01 | 0.363     | 0.261     | 0.285     | -0.539    | -0.064    | 0.172  | 0.172     | 0.027  |
| A024288_01 | -0.357    | -0.293    | 0.238     | 0.277     | -0.063    | -0.041 | -0.084    | -0.141 |
| A024289_01 | -0.299    | -0.437    | -0.215    | 0.278     | -0.037    | -0.03  | 0.152 NA  |        |
| A024291_01 | 0.13      | 0.11      | -0.334    | 0.035     | -0.038    | -0.045 | -0.314    | -0.126 |
| A024292_01 | -0.722    | -0.778    | -0.692    | -0.918    | -0.09     | -0.282 | 0.331     | 0.202  |
| A024293_01 | 0.509     | 0.071     | 0.06      | -0.074 NA |           | 0.034  | 0.087     | -0.095 |
| A024294_01 | -0.091    | -0.244    | -0.105    | 0.07      | 0.011     | -0.188 | -0.104    | -0.224 |
| A024296_01 | 0.04      | 0.027     | 0.04      | -0.224    | 0.084     | 0.185  | 0.423     | 0.069  |
| A024297_01 | -0.034 NA |           | -0.274    | -0.613    | -0.036 NA |        | 0.166     | -0.109 |
| A024298_01 | -0.205    | -0.443    | -0.376    | -0.25     | 0.144     | 0.41   | -0.079    | -0.071 |
| A024299_01 | -0.247    | -0.339    | -0.117    | -0.102    | 0.021     | 0.269  | 0.039     | 0.008  |
| A024300_01 | -0.016    | 0.18      | -0.415    | -0.076    | -0.33     | -0.237 | -0.474    | -0.398 |
| A024302_01 | -0.056    | -0.347    | -0.346    | -0.48     | 0.08      | -0.18  | -0.202    | -0.259 |
| A024303_01 | -0.156    | -0.207    | -0.337    | -1.046    | 0.334     | 0.415  | -0.002    | -0.113 |
| A024304_01 | 0.434     | 0.304     | 0.118     | -0.38     | 0.252     | 0.427  | -0.102    | -0.227 |
| A024305_01 | -0.025    | 0.036     | -0.055    | 0.037     | 0.037     | -0.075 | 0.076     | 0.054  |
| A024306_01 | -0.268    | -0.165    | -0.053    | 0.077     | -0.119    | -0.21  | -0.123    | -0.16  |
| A024308_01 | 0.317     | 0.115     | -0.466    | -0.37     | 0.093     | 0.25   | -0.211    | -0.151 |
| A024310_01 | 0.305     | 0.242     | -0.154    | 0.144     | -0.153    | -0.186 | -0.47     | -0.221 |
| A024311_01 | 0.032     | -0.101    | 0.094     | 0.523     | -0.18     | -0.727 | 0.039     | 0.003  |
| A024312_01 | 0.134     | 0.179     | -0.295    | -0.205    | 0.128     | 0.037  | -0.022    | -0.07  |
| A024315_01 | 0.523     | 0.448     | 0.187     | 0.482     | 0.092     | -0.176 | -0.081    | -0.199 |
| A024318_01 | -0.043    | -0.088    | -0.292    | 0.055     | -0.154    | -0.329 | -0.383    | -0.357 |
| A024321_01 | -0.064    | -0.014    | 0.037     | -0.17     | -0.081    | 0.045  | -0.001    | -0.052 |
| A024326_01 | -1        | -0.803    | -0.84     | -1.549    | -0.578    | -0.182 | -0.934    | -0.525 |
| A024328_01 | -0.411    | -0.482    | 0.044     | -0.151    | -0.11     | -0.207 | -0.083    | -0.125 |
| A024330_01 | -0.09     | 0.04      | -0.355    | -0.363    | -0.186    | -0.076 | -0.224    | -0.218 |
| A024331_01 | -0.106    | -0.083    | -0.106    | -0.497    | 0.102     | 0.09   | -0.01     | -0.088 |
| A024332_01 | 0.291     | 0.296     | 0.919     | 0.763     | 0.396     | 0.439  | 0.382     | 0.361  |
| A024337_01 | -0.024    | 0.044     | 0.169     | 0.013     | 0.173     | 0.04   | 0.071 NA  |        |

|            |           |          |           |           |           |        |          |        |
|------------|-----------|----------|-----------|-----------|-----------|--------|----------|--------|
| A024339_01 | -0.119    | -0.257   | 0.092     | -0.311    | 0.002     | -0.335 | 0.174    | 0.071  |
| A024342_01 | -0.028    | 0.064    | 0.149     | -0.639    | 0.006     | 0.096  | 0.179    | 0.106  |
| A024343_01 | 0.148     | 0        | -0.088    | -0.311    | -0.036    | -0.094 | -0.155   | -0.193 |
| A024345_01 | 0.764 NA  |          | 0.497     | -0.641    | 0.291 NA  |        | 0.249    | 0.181  |
| A024346_01 | 0.063     | -0.259   | -0.029    | 0.283     | 0.012     | -0.34  | 0.098    | -0.129 |
| A024347_01 | -0.069    | 0.022    | 0.029     | -0.299    | 0.09      | 0.205  | 0.335    | 0.273  |
| A024348_01 | 0.37      | 0.163    | 0.058     | -0.412    | 0.173     | 0.371  | 0.202    | 0.051  |
| A024349_01 | -0.681    | -0.366   | 0.657     | 0.333     | 0.27      | 0.421  | 0.799    | 1.089  |
| A024350_01 | 0.11      | -0.202   | 0.612     | 0.291     | 0.611     | 0.579  | 0.192    | 0.101  |
| A024352_01 | 0.409     | 0.383    | 0.166     | -0.059    | 0.269     | 0.157  | -0.054   | -0.17  |
| A024353_01 | 0.172     | 0.234    | 0.671     | 0.764     | 0.16      | -0.042 | 0.646    | 0.36   |
| A024354_01 | -1.675    | -1.727   | 0.3       | 0.263     | -1.4      | -1.748 | -1.222   | -1.134 |
| A024356_01 | -0.462    | -0.469   | -0.207    | -0.097    | -0.22     | -0.046 | -0.215   | -0.105 |
| A024357_01 | 0.426     | 0.056    | -0.169    | -0.086    | 0.201     | 0.051  | 0.353    | 0.219  |
| A024360_01 | 0.803     | 0.867    | 0.774     | 1.036     | 0.763     | 0.926  | 0.172    | 0.072  |
| A024361_01 | 0.538     | 0.498    | -0.008    | 0.241     | -0.199    | 0.221  | -0.039   | -0.034 |
| A024362_01 | 0.088     | 0.022    | -0.08     | 0.103     | 0.349     | 0.503  | 0.198    | 0.173  |
| A024363_01 | -0.123    | -0.338   | 0.317     | 0.045     | 0.201     | -0.083 | 0.199    | -0.053 |
| A024368_01 | 0.167     | 0.262    | -0.071    | -0.83     | 0.309 NA  |        | 0.221    | 0.096  |
| A024369_01 | 0.076     | -0.053   | 0.109     | 0.336     | 0.031 NA  |        | 0.12     | -0.024 |
| A024370_01 | -0.535    | -0.619   | -0.017    | -0.231    | -0.053    | -0.18  | -0.026   | -0.147 |
| A024372_01 | -0.116 NA |          | -0.489    | -0.931    | 0.071     | 0.209  | -0.403   | -0.275 |
| A024373_01 | -0.115    | -0.538   | -0.382    | -0.651    | 0.255     | 0.263  | -0.04    | -0.045 |
| A024374_01 | -0.16     | -0.166   | -0.117 NA |           | 0.114     | 0.014  | -0.019   | -0.153 |
| A024376_01 | 0.219     | -0.058   | 0.124     | 0.095     | 0.336     | 0.275  | 0.231    | -0.172 |
| A024377_01 | -0.405    | -0.235   | 0.26      | -0.021    | -0.264    | -0.319 | -0.13    | 0.036  |
| A024382_01 | -0.109    | -0.105   | -0.286    | -0.039    | 0.146     | 0.303  | 0.131    | 0.127  |
| A024389_01 | 0.093     | 0.084    | 0.089     | -0.379    | 0.196     | -0.034 | 0.161 NA |        |
| A024392_01 | 0.115     | 0.08     | -0.344    | 0.28      | -0.159    | -0.347 | -0.346   | -0.329 |
| A024394_01 | -0.012    | -0.121   | 0.106     | -0.706    | 0.055     | 0.14   | 0.405    | 0.206  |
| A024395_01 | 0.279     | 0.149    | 0.396     | 0.103     | 0.147     | 0.141  | 0.157    | 0.064  |
| A024396_01 | 0.417     | 0.165    | -0.07     | -0.17     | 0.128     | 0.187  | -0.013   | -0.112 |
| A024397_01 | 0.209     | -0.029   | 0.417     | 0.173     | 0.271     | -0.049 | 0.075    | -0.153 |
| A024398_01 | 0.091     | -0.054   | 0.055     | -0.382    | -0.02     | -0.188 | -0.033   | -0.222 |
| A024399_01 | 0.219     | 0.213    | 0.026     | -0.193    | 0.402     | 0.502  | -0.131   | -0.065 |
| A024400_01 | 0.462     | 0.531    | 0.258     | 0.11      | -0.06     | 0.167  | -0.037   | 0.009  |
| A024401_01 | 0.282     | 0.184    | 0.012     | -0.004    | 0.197 NA  |        | 0.24 NA  |        |
| A024402_01 | 0.683     | 0.411    | 0.59      | -0.262    | 0.167 NA  |        | 0.247 NA |        |
| A024403_01 | 0.46      | 0.198    | 0.23      | 0.084     | -0.061    | 0.35   | -0.013   | 0.007  |
| A024404_01 | 0.042     | -0.056   | -0.121    | -0.176    | -0.084    | 0.01   | -0.176   | -0.045 |
| A024405_01 | 0.437     | 0.488    | 0         | -0.747    | 0.413     | 0.482  | -0.052   | -0.148 |
| A024406_01 | 0.466     | 0.289    | -0.007    | -0.336    | 0.4 NA    |        | -0.043   | 0.108  |
| A024410_01 | 0.572     | 0.37     | -0.105    | 0.019     | -0.096    | 0.073  | -0.031   | -0.061 |
| A024413_01 | 0.167     | 0.114    | -0.365    | -0.151    | 0.078     | 0.127  | -0.233   | -0.198 |
| A024414_01 | 0.257     | 0.017    | 0.049     | -0.415    | 0.333     | 0.521  | 0.056    | -0.092 |
| A024417_01 | -0.017    | -0.332   | -0.181    | -0.523    | -0.133 NA |        | 0.063    | -0.049 |
| A024421_01 | -0.375    | -0.817   | -0.686    | -1.073    | -0.404    | -0.676 | -0.354   | -0.289 |
| A024425_01 | 0.703     | 0.765    | 0.16      | -0.03     | 0.088     | 0.32   | 0.023    | -0.043 |
| A024428_01 | 0.18      | 0.153 NA |           | -0.291    | 0.182 NA  | NA     |          | 0.067  |
| A024429_01 | 0.738     | 0.5      | 0.023 NA  |           | 0.34      | 0.67   | 0.41 NA  |        |
| A024430_01 | -0.126    | -0.05    | -0.519    | -1.117    | -0.111    | 0.15   | -0.211   | -0.242 |
| A024431_01 | -0.076    | -0.118   | -0.033    | 0.106     | -0.137    | -0.316 | 0.026    | -0.075 |
| A024434_01 | -0.427    | -0.252   | 0.135     | -0.104    | 0.296     | 0.295  | -0.433   | -0.359 |
| A024435_01 | -0.292    | -0.654   | -0.515    | -0.389    | 0.087     | 0.091  | 0.133    | 0.094  |
| A024439_01 | -0.432    | -0.387   | -0.223    | -0.001    | 0.072     | 0.1    | -0.092   | 0.023  |
| A024440_01 | 0.839     | 0.496    | 0.736     | 0.481     | 0.182     | 0.203  | 0.34     | 0.168  |
| A024441_01 | 0.852     | 0.8      | 0.415     | 0.083     | 0.162     | 0.347  | 0.237    | 0.126  |
| A024442_01 | -0.141    | -0.083   | -0.267    | -0.589    | -0.14     | -0.064 | -0.174   | -0.032 |
| A024443_01 | 0.242     | -0.016   | -0.261    | 0.2       | -0.217    | -0.155 | -0.311   | -0.201 |
| A024445_01 | 0.198     | -0.121   | -0.042    | 0.018     | 0.009     | -0.015 | 0.171    | 0.103  |
| A024447_01 | -1.273    | -1.317   | -1.043    | -1.527    | -0.547    | -0.432 | 0.076    | 0      |
| A024449_01 | -0.173    | -0.41    | 0.305     | -0.216    | -0.011    | -0.197 | 0.665    | 0.498  |
| A024451_01 | -0.135    | -0.216   | 0.334     | -0.294    | 0.214     | 0.052  | 0.147    | 0.04   |
| A024452_01 | 0.001     | 0.102    | 0.222     | -0.174    | 0.23      | 0.179  | 0.274    | 0.237  |
| A024453_01 | -0.107    | -0.01    | -0.02     | -0.03     | -0.355    | -0.424 | -0.257   | -0.008 |
| A024454_01 | 0.758     | 0.617    | 1.252     | 1.491     | 0.708     | 0.684  | 0.387    | 0.756  |
| A024456_01 | 0.665     | 0.449    | 0.205     | -0.215    | 0.552     | 0.66   | 0.094    | 0.11   |
| A024457_01 | -0.163    | -0.312   | -0.687    | -1.224 NA |           | -0.109 | -1.334   | -1.104 |

|            |           |           |           |        |           |           |           |        |
|------------|-----------|-----------|-----------|--------|-----------|-----------|-----------|--------|
| A024459_01 | -0.101    | 0.042     | 0.162     | -0.168 | 0.152     | 0.122     | 0.037     | 0.108  |
| A024461_01 | 0.007     | -0.222    | -0.063    | -0.105 | 0.298     | 0.287     | -0.083    | 0.199  |
| A024464_01 | -2.152    | -2.954 NA |           | -2.635 | -1.496    | -2.18     | -1.142    | -0.838 |
| A024465_01 | 0.024     | -0.08     | -0.185    | -0.197 | 0.161     | 0.219     | -0.35     | -0.229 |
| A024470_01 | -0.436    | -0.391    | -0.429    | -0.109 | -0.125    | 0.009     | 0.133     | 0.139  |
| A024471_01 | 0.58      | 0.506     | 0.034     | -0.18  | 0.146     | 0.201     | 0.068     | 0.274  |
| A024473_01 | -1.934    | -1.327 NA | NA        |        | -0.948    | -0.461    | -0.15 NA  |        |
| A024474_01 | -0.376    | -0.404    | -0.288    | 0.23   | -0.245    | -0.458    | -0.301    | -0.253 |
| A024475_01 | 0.02      | -0.207    | -0.39     | 0.263  | -0.118    | -0.229    | 0.058     | -0.027 |
| A024476_01 | -0.386    | -0.444    | -0.322    | 0.201  | -0.194    | -0.242    | -0.153    | -0.145 |
| A024477_01 | 0.354     | 0.174     | -0.231    | -0.161 | 0.078     | 0.068     | -0.072    | 0.031  |
| A024478_01 | -0.204    | 0.052     | 0.308     | 0.272  | 0.235     | 0.54      | 0.31      | 0.373  |
| A024480_01 | -0.039    | -0.014 NA |           | -0.061 | 0.069     | -0.123    | 0.014     | -0.117 |
| A024481_01 | -0.997    | -0.843    | -1.058    | -0.96  | -0.362    | -0.149    | -0.411    | -0.4   |
| A024482_01 | 0.472     | 0.364     | 0.022     | -0.59  | 0.246     | 0.342     | 0.198     | 0.084  |
| A024484_01 | -0.51     | -0.533    | -0.567    | -0.338 | -0.174    | -0.052    | -0.105    | 0.023  |
| A024485_01 | -1.065    | -1.568    | -1.225    | -1.078 | -1.161    | -1.659    | -0.607    | -0.749 |
| A024489_01 | 0.215     | 0.055     | -0.008    | 0.081  | 0.12      | -0.061    | -0.099    | -0.197 |
| A024490_01 | 0.386     | 0.312     | -0.123 NA |        | 0.276     | 0.173     | -0.183 NA |        |
| A024493_01 | 0.108     | -0.153    | -0.254    | 0.271  | -0.031    | -0.112    | -0.184    | -0.315 |
| A024494_01 | 0.462     | -0.045    | 0.097     | -0.56  | 0.158     | 0.16      | 0.055     | 0.025  |
| A024495_01 | -0.103    | -0.093    | -0.189    | -0.376 | 0.302     | 0.389     | 0.151     | 0.154  |
| A024496_01 | -0.231    | -0.313    | -0.455    | -0.242 | 0.311     | 0.403     | 0.15      | 0.169  |
| A024499_01 | -0.195    | -0.402    | -0.198    | 0.078  | 0.075     | -0.229    | -0.11     | -0.278 |
| A024500_01 | 0.084     | -0.01     | 0.24      | -0.034 | 0.32      | 0.236     | 0.207     | 0.135  |
| A024501_01 | 1.573     | 1.256     | 0.617     | -0.086 | -0.161    | 0.549     | 0.605     | 0.444  |
| A024502_01 | -2        | -2.331 NA | NA        |        | -0.864    | -1.222    | -0.979    | -0.846 |
| A024503_01 | -1.689    | -1.953 NA |           | -1.797 | -1.243    | -1.431    | -0.938    | -0.696 |
| A024504_01 | -0.184    | -0.067    | 0.012     | -0.153 | 0.128     | 0.014     | 0.43      | 0.213  |
| A024505_01 | -0.061    | 0.056     | 0.11      | -0.428 | 0.189     | 0.045     | 0.158     | 0.016  |
| A024506_01 | -0.132    | -0.08     | 0.27      | -0.094 | 0.046     | 0.035     | 0.159     | 0.05   |
| A024507_01 | 0.301     | 0.402     | 0.555     | 0.422  | -0.001    | -0.014    | -0.121    | -0.115 |
| A024508_01 | -0.928    | -0.922    | -0.708    | -0.528 | -0.396    | -0.215    | -0.149    | -0.014 |
| A024509_01 | -0.793    | -0.901    | -0.658    | -0.309 | -0.117    | -0.226    | 0.052     | -0.014 |
| A024510_01 | 0.306     | 0.038     | 0.304     | 0.637  | 0.171     | 0.055     | 0.864     | 0.758  |
| A024511_01 | 0.074     | -0.182    | -0.12     | -0.158 | 0.073     | 0.103     | -0.035    | -0.074 |
| A024512_01 | -1.724    | -1.919    | -0.585    | -0.854 | -1.634    | -1.579    | -0.424    | -0.238 |
| A024513_01 | 0.586     | 0.548     | 0.779     | 0.151  | 0.173     | 0.302     | 0.369     | 0.453  |
| A024514_01 | -0.366    | -0.477    | -0.837    | -0.391 | 0.174     | 0.257     | 0.005     | 0.04   |
| A024518_01 | -0.458    | -0.361    | -0.147    | -0.103 | -0.251    | -0.211    | 0.023     | 0.048  |
| A024521_01 | 0.603     | 0.553     | 0.016     | 0.531  | -0.381    | -0.455    | -0.156    | -0.025 |
| A024522_01 | 0.575     | 0.432     | 0.564     | 0.635  | 0.413     | 0.79      | -0.199    | -0.085 |
| A024523_01 | 0.511     | 0.409     | 0.093     | 0.197  | 0.198     | 0.04      | -0.114    | -0.161 |
| A024526_01 | 0.328     | 0.193     | 0.269     | -0.408 | 0.022     | 0.144     | 0.18      | 0.166  |
| A024527_01 | 0.761     | 0.978     | 1.169     | 0.835  | 0.778     | 1.153     | 0.651     | 0.736  |
| A024528_01 | 0.574     | 0.548     | 0.088     | -0.225 | 0.113     | 0.478     | 0.205     | 0.035  |
| A024530_01 | 0.141     | 0.072     | 0.442     | 0.444  | 0.005     | -0.018    | -0.026    | 0.089  |
| A024531_01 | 0.189     | 0.454     | 0.383     | 0.422  | 0.107     | -0.111    | 0.144     | 0.291  |
| A024532_01 | 0.376     | 0.293     | -0.105    | -0.187 | 0.025     | 0.104     | 0.149     | 0.14   |
| A024534_01 | 0.547     | 0.341     | -0.221    | -0.964 | 0.161     | 0.391     | 0.095     | -0.017 |
| A024536_01 | -0.505    | -0.413    | -0.326    | 0.213  | -0.642    | -0.351    | 0.093     | 0.077  |
| A024538_01 | 0.908     | 0.835     | 0.67      | 0.92   | 0.408     | 0.258     | 0.23      | 0.182  |
| A024539_01 | -0.021    | -0.036    | 0.046     | 0.146  | -0.064    | -0.113 NA | NA        |        |
| A024544_01 | -0.159 NA |           | -0.399    | -0.173 | 0.178 NA  |           | 0.304     | 0.172  |
| A024545_01 | 0.355     | 0.299     | 0.127     | 0.142  | -0.198    | 0.084     | 0.111     | 0.209  |
| A024546_01 | 0.145     | 0.2       | -0.409    | 0.084  | 0.06      | 0.099     | -0.145    | -0.388 |
| A024547_01 | 0.317     | 0.28      | -0.403    | -0.381 | -0.018 NA |           | -0.197    | -0.167 |
| A024548_01 | 0.168     | -0.018    | 0.098     | -0.162 | -0.165    | -0.184    | -0.116    | -0.185 |
| A024549_01 | -0.057    | 0.114     | 0.028     | -0.433 | 0.084     | -0.01     | -0.041    | 0.106  |
| A024551_01 | -0.318    | -0.472 NA | NA        |        | -0.084    | -0.195    | 0.058 NA  |        |
| A024554_01 | -0.224    | -0.426    | -0.391    | 0.249  | -0.079    | 0.031     | -0.175    | 0.045  |
| A024555_01 | -1.034    | -1.007    | 0.425     | 0.056  | 0.087     | -0.06     | 0.731     | 0.84   |
| A024557_01 | -1.366    | -1.017    | -0.654    | -0.322 | -0.326    | -0.254    | 0.233     | 0.279  |
| A024558_01 | -0.247    | -0.267    | 0         | -0.027 | 0.186     | 0.183     | 0.043     | 0.077  |
| A024559_01 | 0.156     | -0.113    | 0.164     | -0.404 | 0.124     | -0.035    | 0.274     | 0.002  |
| A024560_01 | 0.318     | 0.205     | 0.182     | -0.108 | 0.287     | 0.273     | 0.533     | 0.291  |
| A024561_01 | 0.314     | 0.307     | 0.315     | -0.631 | 0.202     | 0.493     | 0.313     | 0.304  |
| A024562_01 | 0.458     | 0.583     | 0.049     | 0.243  | -0.044    | -0.033    | -0.22     | -0.067 |



|            |          |        |        |           |        |        |           |        |
|------------|----------|--------|--------|-----------|--------|--------|-----------|--------|
| A024563_01 | -0.651   | 0.261  | 0.072  | -0.079    | -0.329 | 0.445  | 0.209     | 0.099  |
| A024564_01 | 0.223    | 0.188  | -0.118 | 0.123     | -0.161 | -0.18  | -0.118    | -0.06  |
| A024565_01 | -0.113   | -0.071 | -0.158 | 0.409     | 0.062  | -0.088 | 0.252     | 0.245  |
| A024567_01 | 0.503    | 0.384  | 0.131  | 0.016     | 0.345  | 0.304  | 0.03      | -0.089 |
| A024568_01 | 0.121    | -0.174 | 0.194  | -0.061    | 0.066  | -0.139 | 0.133 NA  |        |
| A024569_01 | -0.365   | -0.501 | -0.266 | 0.153     | -0.157 | -0.196 | 0.191     | 0.051  |
| A024570_01 | -0.357   | -0.35  | 0.117  | -0.044    | 0.182  | -0.11  | -0.1      | -0.037 |
| A024571_01 | -0.146   | -0.061 | -0.451 | -0.034    | -0.147 | -0.167 | -0.273    | -0.259 |
| A024572_01 | 0.108    | 0.145  | -0.055 | -0.259    | 0.099  | -0.056 | -0.151    | -0.146 |
| A024573_01 | 0.461    | 0.325  | 0.431  | 0.258     | 0.199  | 0.42   | 0.534     | 0.275  |
| A024575_01 | 0.003    | -0.251 | 0.074  | 0.143     | 0.197  | 0.137  | 0.241     | 0.245  |
| A024576_01 | 0.511    | 0.399  | -0.372 | 0.419     | 0.215  | 0.004  | -0.122    | -0.157 |
| A024577_01 | -0.311   | -0.06  | -0.205 | 0.187     | -0.071 | -0.046 | -0.155 NA |        |
| A024578_01 | 0.223    | -0.032 | 0.127  | -0.234    | 0.124  | 0.235  | -0.387    | -0.357 |
| A024579_01 | 0.163    | -0.23  | -0.139 | -0.342 NA |        | 0.032  | -0.2      | -0.234 |
| A024580_01 | -0.049   | -0.057 | -0.254 | -0.42     | 0.286  | 0.398  | -0.015    | -0.017 |
| A024581_01 | 0.395    | 0.368  | -0.1   | 0.159     | -0.144 | 0.091  | 0.627     | 0.489  |
| A024583_01 | -0.091   | -0.337 | 0.074  | -0.17     | 0.077  | -0.141 | 0.011     | 0.003  |
| A024584_01 | -0.451   | -0.454 | -0.006 | -0.188    | -0.465 | -0.219 | -0.261    | 0.077  |
| A024585_01 | 0.175    | 0.225  | -0.761 | 0.309     | -0.232 | 0.021  | -0.438    | -0.104 |
| A024586_01 | 0.744    | 0.61   | 0.362  | 0.07      | -0.03  | 0.205  | 0.175     | 0.251  |
| A024588_01 | 1.154    | 1.111  | 0.089  | 0.732     | -0.117 | 0.02   | 0.172     | 0.157  |
| A024589_01 | -0.325   | -0.495 | -0.195 | 0.039     | -0.201 | -0.167 | -0.176    | -0.049 |
| A024590_01 | -0.55    | -0.569 | -0.173 | 0.032     | -0.1   | -0.309 | -0.071    | -0.128 |
| A024592_01 | -0.231   | -0.389 | 0.024  | 0.153     | 0.03   | -0.096 | -0.115    | -0.074 |
| A024595_01 | 0.516    | 0.379  | -0.04  | 0.39      | 0.179  | 0.297  | -0.081    | -0.004 |
| A024596_01 | -0.091   | -0.001 | 0.31   | 0.155     | 0.04   | 0.041  | -0.096    | -0.023 |
| A024597_01 | 0.427    | 0.219  | -0.348 | 0.22      | 0.073  | 0.056  | -0.014    | 0.016  |
| A024598_01 | 0.023    | -0.183 | -0.187 | -0.241    | 0.044  | 0.164  | -0.056    | -0.165 |
| A024599_01 | 0.309    | 0.257  | -0.286 | -0.563    | 0.084  | 0.67   | 0.247     | 0.279  |
| A024601_01 | -0.285   | -0.598 | -0.192 | 0.028     | -0.004 | -0.39  | 0.012     | -0.037 |
| A024602_01 | 0.371    | 0.312  | 0.15   | 0.225     | -0.196 | -0.282 | -0.138    | -0.181 |
| A024603_01 | -0.103   | 0.001  | 0.336  | 0.168     | 0.277  | 0.172  | 0.388     | 0.337  |
| A024604_01 | 0.403    | 0.233  | 0.327  | 0.462     | 0.134  | 0.277  | 0.049     | -0.13  |
| A024605_01 | 0.017    | 0.163  | 0.529  | 0.141     | 0.065  | 0.189  | 0.06      | 0.184  |
| A024606_01 | 0.383    | -0.02  | -0.007 | 0.109     | 0.155  | -0.016 | 0.027     | -0.186 |
| A024607_01 | 0.196    | 0.012  | -0.021 | 0.553     | 0.094  | 0.008  | 0.208     | -0.112 |
| A024608_01 | -0.358   | -0.41  | -0.099 | -0.241    | -0.06  | -0.055 | 0.429     | 0.214  |
| A024609_01 | 0.134    | 0.165  | 0.298  | -0.595    | 0.206  | 0.197  | -0.064    | -0.027 |
| A024610_01 | -0.826   | -0.905 | -0.219 | -0.094    | -0.011 | -0.069 | -0.217    | -0.248 |
| A024611_01 | -0.325   | -0.463 | -0.309 | -0.709    | -0.093 | -0.081 | 0.299     | 0.298  |
| A024612_01 | 0.104    | 0.091  | -0.727 | -0.858    | -0.031 | 0.298  | -0.376    | -0.276 |
| A024613_01 | -0.067   | -0.158 | -0.156 | 0.264     | -0.028 | 0.056  | 0.086     | -0.093 |
| A024614_01 | 0.403    | 0.121  | -0.303 | -0.602    | 0.269  | 0.145  | 0.095     | -0.107 |
| A024615_01 | 0.201    | 0.188  | 0.332  | 0.273     | 0.034  | 0.254  | -0.098    | -0.049 |
| A024616_01 | 0.55     | 0.492  | -0.175 | -0.034    | 0.306  | 0.17   | -0.064    | -0.149 |
| A024617_01 | -0.005   | 0.149  | 0.489  | 0.36      | -0.133 | -0.039 | 0.274     | 0.211  |
| A024620_01 | 0.372    | 0.611  | 0.207  | -0.786    | 0.216  | 0.743  | 0.25      | 0.186  |
| A024621_01 | 0.745 NA |        | -0.184 | 0.153 NA  | NA     |        | 0.277     | 0.213  |
| A024622_01 | -0.007   | -0.038 | -0.232 | -0.61     | 0.209  | 0.329  | -0.137 NA |        |
| A024624_01 | -0.171   | -0.086 | 0.016  | -0.047 NA |        | 0.513  | 0.046     | 0.074  |
| A024626_01 | 0.39     | 0.075  | 0.147  | -0.132    | 0.002  | -0.131 | 0.461     | 0.122  |
| A024627_01 | -0.134   | -0.302 | -0.039 | -0.223    | -0.02  | -0.06  | 0.111     | 0.033  |
| A024628_01 | 0.541    | 0.202  | 0.226  | -0.186 NA |        | 0.091  | 0.137 NA  |        |
| A024629_01 | -0.263   | -0.288 | -0.058 | -0.744    | -0.133 | 0.001  | -0.313    | -0.293 |
| A024630_01 | 0.242    | 0.081  | -0.525 | 0.019     | -0.241 | -0.184 | -0.242    | -0.122 |
| A024631_01 | -0.133   | -0.249 | 0.15   | -0.055    | 0.033  | -0.142 | 0.1       | 0.004  |
| A024632_01 | -0.344   | -0.338 | -0.162 | 0.033     | -0.141 | -0.297 | -0.119    | -0.169 |
| A024633_01 | 0.624    | 0.592  | 0.881  | 0.742     | 0.037  | -0.106 | 0.953     | 0.94   |
| A024634_01 | 0.069    | -0.105 | -0.009 | -0.226    | 0.001  | 0.101  | -0.029    | -0.006 |
| A024635_01 | -0.502   | -0.414 | 0.362  | -0.097    | -0.248 | -0.696 | 0.017     | 0.138  |
| A024636_01 | 0.325    | 0.062  | -0.174 | -0.853    | 0.224  | 0.381  | 0.119     | -0.134 |
| A024637_01 | 0.165    | 0.093  | -0.192 | 0.129     | -0.211 | -0.095 | -0.262    | -0.207 |
| A024638_01 | -0.366   | -0.363 | 0.003  | 0.065     | -0.08  | -0.09  | 0.224     | 0.23   |
| A024640_01 | 0.395    | 0.103  | 0.155  | -0.07     | 0.37   | 0.158  | 0.106     | -0.185 |
| A024642_01 | -0.3     | -0.315 | 0.341  | -0.083    | 0.074  | 0.094  | 0.61      | 0.367  |
| A024644_01 | 0.467    | 0.445  | -0.216 | -0.135    | 0      | 0.041  | 0.024     | 0.098  |
| A024645_01 | -0.446   | -0.215 | -0.022 | -0.117    | -0.218 | -0.046 | -0.304    | -0.08  |

|            |           |           |           |           |           |        |           |        |
|------------|-----------|-----------|-----------|-----------|-----------|--------|-----------|--------|
| A024646_01 | -0.156    | -0.124    | -0.107    | 0.003     | 0.11      | -0.118 | -0.102 NA |        |
| A024647_01 | 0.24      | 0.376     | 0.536     | 0.368     | -0.501    | -0.725 | 0.086     | -0.083 |
| A024648_01 | 0.462     | 0.556     | 0.207     | 0.218     | 0.347     | 0.479  | 0.155     | -0.033 |
| A024649_01 | 0.367     | 0.596     | -0.078    | 0.303     | 0.275     | 0.44   | 0.696     | 0.768  |
| A024650_01 | 0.29      | 0.154     | -0.376    | -0.582    | 0.192     | 0.158  | -0.019    | -0.096 |
| A024651_01 | 0.161     | 0.129     | 0.184     | 0.219     | -0.013    | -0.084 | 0.105     | 0.061  |
| A024652_01 | -0.458    | -0.427    | -0.062    | 0.044     | -0.268    | -0.401 | -0.338    | -0.247 |
| A024653_01 | -0.969 NA |           | -0.68     | -0.968    | -0.325 NA |        | -0.394    | -0.492 |
| A024656_01 | 0.473     | 0.318     | -0.171    | -1.047    | 0.236     | 0.185  | -0.071    | -0.24  |
| A024657_01 | 1.022     | 0.968     | -0.12     | 0.001     | -0.149    | 0.239  | -0.008    | 0.087  |
| A024658_01 | 0.031     | -0.059    | -0.412    | -0.359    | 0.249     | -0.038 | -0.109    | -0.17  |
| A024659_01 | -0.627 NA |           | -0.434    | -0.089    | -0.202 NA |        | -0.229    | -0.257 |
| A024661_01 | -0.317    | -0.4      | 0.029     | -0.015    | 0.073     | -0.276 | -0.029    | -0.143 |
| A024663_01 | -0.931    | -1.193    | -0.308    | -0.324    | 0.141     | -0.101 | 0.367     | 0.09   |
| A024664_01 | -1.016    | -0.835    | -0.376    | -0.435    | -0.215    | -0.132 | -0.309    | -0.092 |
| A024665_01 | 0.267     | 0.179     | 0.248     | 0.214     | 0.282     | 0.042  | -0.058    | -0.094 |
| A024666_01 | 0.077     | -0.004    | 0.201     | 0.343     | 0.174     | 0.275  | 0.416     | 0.296  |
| A024667_01 | -0.017    | -0.085    | 0.267     | -0.801    | 0.162     | 0.275  | 0.029     | 0.083  |
| A024669_01 | 0.441     | 0.088     | -0.111    | -0.034    | 0.172     | 0.119  | 0.07      | -0.046 |
| A024670_01 | 0.291     | 0.263     | -0.257    | -0.215    | -0.027    | 0.005  | -0.415    | -0.215 |
| A024671_01 | -0.261    | -0.188    | -0.257    | -0.024    | -0.164    | -0.284 | -0.209    | -0.162 |
| A024672_01 | -0.366    | -0.327    | -0.135    | -0.823    | -0.122    | -0.294 | -0.175    | -0.077 |
| A024673_01 | -0.658    | -0.926    | -0.194    | -0.126    | -0.695    | -1.149 | -0.607    | -0.502 |
| A024674_01 | 0.007     | -0.055    | 0.268     | 0.621     | 0.16      | 0.093  | 0.014     | 0.014  |
| A024675_01 | 0.249     | 0.147     | 0.032     | -0.099    | 0.153     | 0.002  | -0.035    | -0.204 |
| A024676_01 | -0.08     | -0.018    | -0.185    | 0.383     | 0.195     | 0.295  | -0.222    | -0.295 |
| A024677_01 | 0.203     | 0.083     | -0.152    | -0.239    | 0.313     | 0.401  | 0.262     | 0.161  |
| A024678_01 | 0.03      | -0.15     | -0.268    | -0.05     | 0.294     | -0.181 | 0.175 NA  |        |
| A024680_01 | 0.415     | 0.401     | -0.048    | 0.252     | 0.217     | 0.251  | 0.314     | 0.196  |
| A024681_01 | 0.488     | 0.212     | -0.227    | -0.463    | 0.085     | -0.365 | 0.091     | -0.052 |
| A024682_01 | 0.391     | 0.607     | -0.262    | -1.118    | 0.754     | 0.848  | 0.149     | -0.029 |
| A024684_01 | -0.316    | -0.091    | 0.262     | 0.166     | -0.027    | -0.01  | -0.209    | 0.028  |
| A024686_01 | 0.155     | -0.048    | -0.055    | -0.148    | 0.168 NA  |        | 0.015     | -0.233 |
| A024687_01 | 0.034     | 0.046     | 0.801     | 0.177     | 0.137     | 0.012  | 0.774     | 0.627  |
| A024689_01 | 0.897     | 0.739     | 0.202     | -0.77     | 0.202     | 0.409  | 0.014     | -0.037 |
| A024690_01 | 0.878     | 0.679     | 0.685     | 0.35      | 0.19      | 0.671  | 0.408     | 0.255  |
| A024694_01 | 0.357     | 0.323     | 0.484     | 0.71      | -0.008    | -0.008 | 0.405     | 0.363  |
| A024699_01 | -1.565    | -1.788 NA |           | -1.499    | -0.942    | -1.218 | -0.677 NA |        |
| A024718_01 | 0.147     | 0.004     | 0.199     | -0.23     | 0.251     | 0.017  | 0.019     | -0.201 |
| A024719_01 | 0.052 NA  |           | 0.077 NA  |           | 0.075 NA  |        | 0.084     | 0.07   |
| A024720_01 | 0.138     | 0.125     | 0.386     | 0.012     | 0.241     | 0.003  | 0.065     | -0.044 |
| A024724_01 | -0.126    | -0.025    | 0.357     | 0.526     | -0.061    | -0.594 | -0.372    | -0.361 |
| A024725_01 | 0.352     | 0.389     | 0.662     | 0.475     | -0.049    | -0.189 | 0.295     | 0.231  |
| A024728_01 | 0.377     | 0.236     | 0.516     | -0.035    | 0.431     | 0.332  | 0.134     | -0.027 |
| A024749_01 | 0.167     | 0.042 NA  |           | -0.458    | 0.342 NA  |        | 0.109     | -0.036 |
| A024778_01 | 0.106     | 0.197     | -0.007 NA |           | 0.289     | 0.019  | 0.132     | -0.123 |
| A024780_01 | 0.013     | -0.078    | -0.089    | 0.013     | 0.073     | -0.215 | -0.008    | -0.205 |
| A024783_01 | -0.109    | -0.283    | -0.126    | -0.584    | -0.337    | -0.383 | -0.144    | -0.19  |
| A024784_01 | 0.324     | -0.077    | -0.088    | 0.09      | 0.196     | -0.015 | 0.119     | -0.086 |
| A024785_01 | -0.46     | -0.328    | 0.057     | 0.299     | -0.403    | -0.761 | -0.185    | 0.074  |
| A024786_01 | -0.135    | -0.623    | -0.17     | 0.106     | 0.147     | -0.448 | -0.054    | -0.207 |
| A024788_01 | 0.041     | 0.269     | -0.342    | -0.595    | -0.164    | -0.273 | -0.68     | -0.577 |
| A024789_01 | -0.29     | 0.081     | -0.268    | -0.596    | -0.117    | 0.022  | -0.482    | -0.112 |
| A024790_01 | 0.672     | 0.423     | -0.019    | 0.064     | 0.385     | 0.53   | 0.001     | 0.029  |
| A024791_01 | 0.391     | 0.599     | 0.658     | 0.444     | 0.107     | 0.23   | 0.299     | 0.419  |
| A024794_01 | -0.01     | -0.349    | 0.102     | -0.082    | 0.211     | -0.288 | 0.115     | -0.233 |
| A024795_01 | 0.889     | 0.799     | 0.37      | 0.262     | 0.185     | 0.619  | 0.17      | 0.106  |
| A024822_01 | -0.432    | -0.452    | -0.418    | -0.582    | -0.169    | -0.244 | -0.016    | -0.199 |
| A024841_01 | -0.237 NA |           | 0.12      | -0.375 NA |           | 0.183  | 0.416     | 0.266  |
| A024854_01 | 0.276     | 0.336     | 0.035     | -0.537    | 0.018     | 0.193  | 0.049     | 0.088  |
| A024856_01 | -1.871    | -2.452    | -0.293    | -0.282    | -2.108    | -3.178 | -1.582    | -1.245 |
| A024862_01 | -0.345    | -0.592    | -0.078    | -0.332    | 0.229     | -0.025 | -0.37     | -0.455 |
| A024863_01 | 0.069     | 0.15      | 0.185     | -0.592    | 0.299     | 0.487  | 0.072     | 0.02   |
| A024872_01 | -1.175 NA |           | -1.162    | -1.079    | -0.349    | -0.684 | -0.33     | -0.289 |
| A024873_01 | -0.665    | -1.266    | -0.614    | -1.08     | -0.235    | -0.262 | -0.189    | -0.281 |
| A024876_01 | -0.031    | -0.346    | -0.041    | 0.06      | 0.026     | -0.234 | -0.084    | -0.327 |
| A024881_01 | -0.198    | -0.246    | -0.544    | -1.228    | 0.034     | -0.12  | -0.084    | -0.566 |
| A024886_01 | 0.225     | 0.15      | 0.115     | -0.295    | -0.037    | -0.011 | -0.104    | -0.181 |

|            |           |           |          |        |           |           |           |        |
|------------|-----------|-----------|----------|--------|-----------|-----------|-----------|--------|
| A024890_01 | -0.324    | -0.443    | -0.362   | -0.561 | 0.474     | 0.153     | 0.687     | 0.394  |
| A024913_01 | -0.033    | -0.177    | -0.169   | -0.015 | 0.069     | -0.098    | 0.237     | -0.155 |
| A024975_01 | -0.038    | -0.118    | -0.071   | -0.276 | 0.087     | 0.002     | 0.2       | -0.085 |
| A024976_01 | 0.699     | 0.547     | 0.518    | 0.374  | 0.437     | 0.275     | 0.547     | 0.15   |
| A024978_01 | 0.177     | 0.156     | 0.027    | 0.032  | -0.002    | -0.182    | 0.143     | -0.102 |
| A024993_01 | -0.184    | -0.392    | 0.098    | -0.185 | 0.055     | -0.131    | 0.029     | -0.058 |
| A025018_01 | 0.538     | 0.168     | -0.18    | -0.268 | 0.367     | 0.56      | 0.033     | -0.184 |
| A025019_01 | 0.774     | 0.441     | 0.126    | -0.555 | 0.153 NA  |           | 0.143     | -0.107 |
| A025036_01 | 0.433     | 0.271     | -0.119   | -0.579 | 0.193     | 0.435     | 0.016     | 0.082  |
| A025053_01 | 0.742 NA  |           | -0.054   | -0.932 | 0.267     | 0.717     | 0.272     | 0.06   |
| A025058_01 | -0.02     | 0.012     | 0.216    | -0.223 | 0.457     | 0.406     | 0.212     | 0.059  |
| A025060_01 | -1.312    | -1.872    | -0.724   | -0.907 | -0.292    | -0.444    | -1.146    | -0.944 |
| A025061_01 | -1.916    | -1.962    | -1.176   | -1.428 | -0.786    | -0.631    | -0.474    | -0.271 |
| A025074_01 | -0.376    | -0.238    | -0.44    | -0.351 | -0.048    | -0.029    | 0.034     | -0.055 |
| A025076_01 | 0.417     | 0.058     | 0.28     | 0.16   | 0.019     | 0.226     | 0.023     | -0.096 |
| A025079_01 | -0.144 NA |           | 0.319    | 0.052  | 0.179     | -0.138    | 0.152     | 0.048  |
| A025085_01 | -0.026    | -0.305    | 0.356    | 0.065  | 0.16      | 0.126     | 0.001 NA  |        |
| A025092_01 | -0.906    | -0.97 NA  |          | -0.268 | -0.249    | -0.389 NA |           | -0.122 |
| A025101_01 | 0.201     | 0.152     | 0.795    | 0.37   | 0.391     | 0.342     | 0.438     | 0.113  |
| A025116_01 | 0.399     | 0.297     | 0.352    | -0.023 | 0.306     | 0.461     | 0.017     | -0.034 |
| A025130_01 | -0.02     | -0.341    | -0.704   | -0.62  | -0.418    | -0.362    | -0.399    | -0.39  |
| A025131_01 | 0.072     | 0.031     | 0.024    | 0.111  | 0.223     | 0.007     | 0.099 NA  |        |
| A025148_01 | -0.027    | -0.069    | 0.395 NA |        | 0.058     | -0.253    | 0.262     | -0.067 |
| A025176_01 | 0.901     | 0.59      | -1.016   | -1.341 | 0.127     | 0.66      | -0.107    | 0.021  |
| A025188_01 | 0.269     | 0.01      | 0.149    | -0.052 | 0.113     | 0.065     | 0.134     | -0.075 |
| A025190_01 | -1.593    | -1.787    | 0.05     | 0.148  | -1.916    | -2.394    | -0.85     | -0.678 |
| A025206_01 | -0.624    | -1.054    | -0.217   | -0.645 | -0.2      | -0.565    | 0.055     | -0.082 |
| A025211_01 | -0.073    | -0.183    | -0.018   | -0.277 | 0.38      | 0.242     | 0.146     | -0.224 |
| A025242_01 | -0.269    | -0.792    | -0.492   | -0.552 | -0.025    | -0.188    | -0.117    | -0.273 |
| A025254_01 | 0.486     | 0.34      | 0.015    | -0.764 | 0.274     | 0.412     | 0.152     | 0.101  |
| A025261_01 | 0.693     | 0.512     | 0.16     | -0.458 | 0.336     | 0.337     | 0.003     | -0.138 |
| A025268_01 | -0.587    | -1.163    | -0.793   | -1.071 | -0.109    | -0.278    | 0.36      | 0.223  |
| A025273_01 | -0.449    | -0.245    | -0.008   | 0.171  | -0.154    | -0.177    | -0.238    | -0.078 |
| A025274_01 | -0.148    | -0.198    | 0.428    | 0.19   | 0.271     | 0.394     | 0.033     | 0.094  |
| A025287_01 | -0.001    | 0         | 0.075    | -0.136 | -0.016    | -0.11     | 0.056 NA  |        |
| A025301_01 | 0.35      | 0.152     | 0.256    | 0.001  | -0.066    | -0.155    | 0.085     | -0.042 |
| A025313_01 | -0.934    | -1.203    | -1.493   | -1.622 | 0.242     | 0.118     | -0.624    | -0.724 |
| A025335_01 | -0.291    | -0.264    | -0.12    | 0.185  | 0.036     | -0.164    | -0.33     | -0.245 |
| A025341_01 | 0.464     | 0.281     | 0.095    | -0.145 | 0.336     | 0.45      | 0.144     | -0.086 |
| A025351_01 | 0.285     | 0.312     | 0.366 NA |        | 0.024     | -0.173    | 0.04 NA   |        |
| A025353_01 | 0.743     | 0.484     | 0.372    | -0.247 | 0.094     | 0.461     | 0.099     | 0.163  |
| A025368_01 | -2.197    | -2.605    | -0.366   | -0.229 | -2.701    | -3.388    | -1.769    | -1.488 |
| A025372_01 | -0.697    | -0.602    | 0.119    | -1.145 | -0.205    | -0.083    | 0.098     | 0.088  |
| A025376_01 | -0.037    | -0.037    | -0.205   | -0.361 | -0.029    | -0.213    | -0.047 NA |        |
| A025393_01 | -0.544    | -0.577 NA |          | -1.139 | -0.231    | -0.283    | -0.521 NA |        |
| A025394_01 | 0.106     | 0.297     | -0.162   | -0.044 | 0.274     | 0.273     | 0.147     | 0.277  |
| A025397_01 | -0.694    | -0.851    | 0.537    | 0.721  | -0.803    | -0.751    | 0.313     | 0.21   |
| A025403_01 | 0.343     | 0.374     | 0.517    | 0.618  | -0.088    | -0.015    | 0.112     | 0.448  |
| A025406_01 | -0.07 NA  |           | -0.565   | -1.089 | 0.382     | 0.492     | 0.04      | 0.046  |
| A025408_01 | -0.306    | -0.116    | 0.25     | -0.785 | -0.266    | 0.235     | 0         | 0.384  |
| A025418_01 | 0.043 NA  |           | 0.477 NA |        | -0.015 NA |           | 0.254     | 0.151  |
| A025456_01 | 0.664     | 0.296     | -0.14    | -0.348 | 0.336     | 0.52      | 0.058     | 0.012  |
| A025462_01 | -0.442    | -0.653    | -0.249   | 0.083  | -0.219    | -0.503    | -0.226    | -0.261 |
| A025468_01 | -0.246    | -0.277    | 0.128    | 0.198  | -0.133    | -0.248    | -0.09     | -0.234 |
| A025469_01 | -1.963    | -2.371    | -0.578   | -0.752 | -2.24 NA  |           | 0.026     | 0.259  |
| A025479_01 | 0.044     | 0.023     | 0.659    | 0.388  | -0.075    | -0.386    | 0.586     | 0.462  |
| A025487_01 | 0.337     | 0.03      | 0.383    | -0.175 | -0.454 NA |           | 0.2       | 0.036  |
| A025502_01 | -0.329    | -0.73     | 0.646    | 0.171  | 0.127     | -0.689    | 0.594     | 0.248  |
| A025513_01 | 0.141     | 0.216     | 0.32 NA  |        | -0.022 NA |           | 0.088     | 0.227  |
| A025519_01 | -0.151    | 0.055     | 0.009    | 0.079  | 0.342     | 0.09      | -0.039    | -0.08  |
| A025522_01 | 0.196     | 0.044     | 0.239    | 0.066  | 0.175     | 0.028     | 0.117     | -0.007 |
| A025542_01 | -0.278    | -0.132    | -0.028   | 0.142  | -0.171 NA |           | 0.084 NA  |        |
| A025582_01 | 0.713     | 0.747     | 0.434    | -1.37  | 0.354 NA  |           | 0.53      | 0.462  |
| A025585_01 | 0.305 NA  |           | 0.615 NA |        | 0.293     | 0.323     | 0.337     | 0.111  |
| A025587_01 | 0.953     | 0.884     | 0.359    | -0.516 | 0.303     | 0.719     | -0.024    | -0.108 |
| A025588_01 | -1.028    | -0.971    | -1.024   | -1.371 | -0.038    | 0.255     | -0.493    | -0.423 |
| A025590_01 | 0.508     | 0.469     | 0.172    | 0.674  | 0.028 NA  |           | -0.214    | -0.367 |
| A025600_01 | 0.268     | 0.177     | 0.363    | 0.198  | -0.141    | -0.43     | -0.053    | -0.178 |

|            |           |           |          |           |           |           |           |        |
|------------|-----------|-----------|----------|-----------|-----------|-----------|-----------|--------|
| A025603_01 | -0.101    | 0.267     | 0.322    | 0.303     | -0.086    | -0.032    | -0.082    | 0.146  |
| A025613_01 | -0.042    | 0.026     | 0.093    | -0.021    | 0.094     | 0.084     | 0.117 NA  |        |
| A025618_01 | 0.308     | 0.449     | 0.114    | -0.665    | 0.123     | 0.229     | -0.03     | 0.102  |
| A025621_01 | 0.358     | 0.04      | 0.129    | -0.187    | 0.145     | -0.015    | 0.017     | -0.193 |
| A025639_01 | -0.805    | -0.932    | -0.917   | -1.227    | -0.288    | -0.32     | -0.325    | -0.242 |
| A025644_01 | 0.24      | 0.468     | 0.083    | 0.126     | 0.093     | 0.516     | -0.005    | 0.054  |
| A025645_01 | 0.019     | -0.08     | -0.126   | 0.168     | 0.028     | -0.18     | -0.177    | -0.229 |
| A025683_01 | -1.637    | -1.831    | -1.187   | -1.17     | -1.244    | -1.445 NA | NA        |        |
| A025697_01 | 0.74      | 0.428     | 0.109    | -0.012    | 0.118     | 0.609     | 0.044     | 0.048  |
| A025712_01 | 0.423     | -0.001    | -0.044   | -0.311    | 0.075     | 0.175     | 0.312     | 0.1    |
| A025718_01 | 0.457     | 0.276     | -0.134   | -0.125    | 0.281     | 0.484     | 0.801     | 0.645  |
| A025719_01 | 0.291     | 0.184     | 0.211    | -0.081    | 0.214     | 0.118     | 0.278     | 0.291  |
| A025727_01 | -1.459    | -1.138    | 0.33     | -0.053    | -0.835    | -0.522    | -0.163    | 0.051  |
| A025728_01 | -0.63     | -0.496    | 0.18     | 0.192     | -0.542    | -0.897    | -0.189    | 0.093  |
| A025730_01 | -0.292    | -0.506    | -0.026   | -0.231    | -0.104    | -0.504    | -0.154 NA |        |
| A025733_01 | -0.894    | -0.808    | -0.235   | -0.547    | -0.401    | -0.735    | 0.074     | -0.022 |
| A025735_01 | -0.069    | -0.039    | -0.13    | -0.171    | -0.002    | 0.026     | 0.032     | 0.017  |
| A025739_01 | -0.606    | -0.552    | -0.001   | -0.794    | 0.166     | 0.145     | -0.224    | -0.182 |
| A025740_01 | -1.022    | -0.149 NA | NA       |           | -0.304    | 0.482     | -0.612    | 0.143  |
| A025747_01 | 0.235     | 0.07      | -0.208   | -0.559    | 0.041     | 0.24      | -0.118    | -0.101 |
| A025758_01 | -0.033    | -0.343    | -0.398   | -0.145 NA | NA        |           | 0.01      | -0.374 |
| A025759_01 | 1.099     | 0.858     | 0.138    | -0.543    | -0.137    | 0.65      | 0.159     | 0.178  |
| A025762_01 | 0.631     | 0.682     | 0.601 NA | NA        |           | -0.57     | 0.193 NA  |        |
| A025765_01 | 0.495     | 0.749     | -0.535   | -0.748    | 0.32      | 0.598     | 0.3       | 0.188  |
| A025767_01 | -0.742    | -0.135    | 0.238    | -0.434    | -0.34     | 0.074     | 0.022     | 0.437  |
| A025768_01 | -0.012    | -0.128    | -0.221   | -0.399    | 0.159     | 0.143     | -0.069    | -0.077 |
| A025769_01 | 0.943     | 0.808     | 0.517    | 0.217     | 0.303     | 0.676     | 0.044     | 0.005  |
| A025770_01 | -0.248    | -0.2      | -0.478   | -0.434    | 0.057     | 0.095     | -0.192    | -0.137 |
| A025772_01 | 0.28      | 0.641     | 0.697    | 0.703     | 0.004     | 0.362     | 0.487     | 0.577  |
| A025776_01 | -0.538    | -1.001    | -0.12    | -0.039    | -0.61     | -1.438    | 0.199     | -0.055 |
| A025777_01 | 0.682     | 0.605     | 0.284    | 0.106     | 0.354     | 0.506     | 0         | 0.008  |
| A025778_01 | 0.668     | 0.373     | -0.112   | -0.228    | -0.05     | 0.339     | 0.118     | 0.164  |
| A025780_01 | -0.229 NA |           | -0.026   | -0.651    | -0.297 NA |           | 0.091     | -0.003 |
| A025785_01 | -0.116    | -0.163    | 0.016    | -0.208    | 0.089     | -0.144    | 0.103     | -0.045 |
| A025787_01 | -0.463    | -0.613    | -0.739   | -0.956    | -0.003    | -0.191    | -0.707    | -0.608 |
| A025788_01 | -0.409    | -0.316    | -0.221   | -0.241    | 0.035     | 0.247     | 0.087     | 0.17   |
| A025795_01 | -1.026    | -1.193    | -0.129   | 0.013     | -0.787    | -1.251    | -0.177    | -0.209 |
| A025798_01 | 0.95      | 0.7       | 0.351    | 0.156     | 0.087     | 0.628     | 0.177     | 0.041  |
| A025799_01 | -0.153    | 0.209     | -0.07    | 0.03      | -0.082    | 0.331     | 0.073     | 0.015  |
| A025803_01 | -0.135    | -0.134    | 0.455    | -0.107    | -0.045    | -0.317    | 0.16 NA   |        |
| A025804_01 | 0.41      | 0.332     | 0.33     | -0.379    | 0.232     | 0.156     | 0.082     | -0.123 |
| A025807_01 | -0.068 NA |           | -0.286   | 0.272     | -0.155 NA |           | -0.402    | 0.225  |
| A025814_01 | 0.889     | 0.548     | 0.382    | -0.191    | 0.053     | 0.405     | 0.441     | 0.119  |
| A025818_01 | 0.004     | -0.01     | 0        | 0.163     | -0.007    | -0.136    | 0.387     | 0.233  |
| A025825_01 | -0.495    | -0.291 NA | NA       |           | 0.09      | -0.023    | 0.22      | 0.239  |
| A025827_01 | 0.441     | 0.169     | -0.188   | 0.14      | 0.197     | 0.253     | 0.048     | -0.049 |
| A025828_01 | -0.093 NA |           | -0.364   | -1.671    | 0.242     | 0.798     | 0.547     | 0.475  |
| A025844_01 | 0.697     | 0.595     | 0.977    | 0.288     | -0.213    | -0.491    | 0.258     | 0.119  |
| A025846_01 | 0.894     | 0.683     | -0.124   | -0.015    | -0.059    | 0.159     | -0.011    | -0.179 |
| A025847_01 | 0.665     | 0.644     | 0.949    | 0.553     | 0.567     | 0.695     | 0.605     | 0.373  |
| A025849_01 | 0.852     | 0.624     | 0.272    | 0.573     | 0.452     | 0.578     | -0.114    | -0.237 |
| A025861_01 | 0.193     | 0.003     | -0.558   | -0.317    | 0.042     | 0.516     | -0.181    | -0.103 |
| A025867_01 | 0.48      | 0.406     | 0.245    | 0.029     | 0.004 NA  |           | 0.079     | -0.051 |
| A025868_01 | -0.513    | -0.668    | -0.397   | -0.751    | -0.39     | -0.432    | -0.055    | 0.046  |
| A025869_01 | -0.387    | -0.369    | -0.558   | -1.015    | -0.215    | -0.249    | -0.201    | -0.22  |
| A025870_01 | -0.298    | -0.204    | -0.428   | -0.362    | -0.095    | -0.06     | 0.006     | 0.036  |
| A025872_01 | -0.442    | -1.097    | -0.743   | -0.928    | -0.129    | -0.866    | 0.004     | -0.132 |
| A025873_01 | 0.152 NA  |           | -0.276   | -0.513    | 0.261     | 0.925     | -0.212    | 0.076  |
| A025874_01 | 0.42 NA   |           | -0.031   | -0.317    | 0.035     | 0.532     | -0.121    | -0.035 |
| A025878_01 | -0.227    | -0.129    | -0.277   | -0.101    | -0.051    | -0.096    | -0.096    | -0.164 |
| A025887_01 | -0.132    | 0.048     | -0.051   | 0.04      | -0.136    | 0.334     | 0.06      | 0.177  |
| A025896_01 | -0.362    | -0.247    | -0.306   | -0.154    | 0.033     | 0.173     | -0.102    | 0.072  |
| A025899_01 | -0.154    | -0.157    | -0.144   | -0.134    | 0.035     | 0.167     | -0.211    | -0.099 |
| A025900_01 | -0.127    | 0.254     | 0.671    | 0.727     | 0.038     | 0.108     | 0.327     | 0.314  |
| A025901_01 | -0.083    | 0.018     | 0.258    | -0.156    | -0.21     | 0.058     | -0.05     | 0.107  |
| A025908_01 | 0.162     | 0.097     | 0.08     | -0.053    | 0.106     | 0.092     | -0.021    | -0.108 |
| A025909_01 | 0.305     | 0.136     | -0.422   | -0.459    | 0.149     | 0.39      | -0.007    | -0.003 |
| A025910_01 | -0.577    | -0.668    | -0.29    | -0.74     | -0.362    | -0.459    | -0.014    | -0.096 |

|            |          |          |           |           |           |        |           |        |
|------------|----------|----------|-----------|-----------|-----------|--------|-----------|--------|
| A025911_01 | -0.094   | 0.314    | -1.541    | -1.473    | -0.613    | -1.925 | -2.704    | -2.235 |
| A025916_01 | 0.858    | 0.295    | -0.018    | -0.416    | 0.169     | 0.164  | -0.219    | -0.325 |
| A025918_01 | -0.048   | 0.089    | -0.275    | 0.019     | 0.143     | 0.179  | -0.187    | -0.1   |
| A025920_01 | -0.315   | -0.243   | -0.318    | -0.314    | -0.112    | -0.079 | -0.103    | 0.074  |
| A025922_01 | -0.27    | -0.459   | -0.486    | -0.927    | 0.279     | -0.037 | -0.087    | -0.056 |
| A025924_01 | 0.053    | -0.117   | -0.114    | 0.136     | 0.152     | 0.221  | -0.274    | -0.24  |
| A025929_01 | -0.898   | -1.104   | 0.287     | 0.14      | -0.387    | -0.679 | 0.005     | -0.094 |
| A025931_01 | 1.093    | 0.936    | 0.431     | -1.107    | 0.194 NA  |        | 0.197     | 0.194  |
| A025937_01 | -0.191   | -0.121   | -0.835    | -0.921    | 0.101     | -0.027 | -0.428    | -0.38  |
| A025939_01 | -0.215   | -0.198   | -0.188    | 0.05      | 0.271     | 0.124  | 0.056     | 0.066  |
| A025941_01 | 0.438    | 0.498    | 0.229     | 0.121     | 0.146     | 0.598  | 0.165     | 0.076  |
| A025942_01 | -1.059   | -0.913   | 0.016     | 0.111     | -0.948    | -1.136 | -0.308    | -0.095 |
| A025944_01 | 0.908 NA |          | 0.648     | 0.356     | 0.058     | 0.749  | -0.145    | -0.105 |
| A025947_01 | -0.777   | -1.134   | 0.184     | 0.003     | -0.157    | -0.197 | 0.648     | 0.493  |
| A025949_01 | -0.031   | -0.191   | -0.316    | -0.275    | 0.128     | 0.191  | 0.067     | 0.008  |
| A025951_01 | -0.052   | 0.2      | 0.17      | -0.024    | -0.147    | -0.101 | -0.097    | -0.084 |
| A025956_01 | 0.231    | 0.333    | -0.133    | -0.069    | 0.067     | 0.454  | 0.006     | 0.034  |
| A025957_01 | 1.091    | 1.039    | 0.165     | -0.198    | 0.033     | 0.479  | 0.008     | 0.056  |
| A025958_01 | -0.389   | -0.536   | -0.643    | -0.449    | -0.427    | -0.517 | -0.014    | -0.045 |
| A025959_01 | 0.073    | 0.009    | -0.186    | -0.358    | -0.142    | 0.083  | -0.031    | 0.046  |
| A025961_01 | -0.541   | -0.396   | -0.456    | -0.492    | -0.13     | 0.187  | -0.38     | -0.202 |
| A025962_01 | 0.423    | 0.453    | -0.154    | -0.364    | 0.26      | 0.299  | 0.091     | 0.131  |
| A025963_01 | 0.541    | 0.567    | 0.154     | 0.296     | 0.266     | 0.483  | 0.023     | 0.135  |
| A025965_01 | 0.599    | 0.59     | 0.105     | -0.667    | 0.335     | 0.564  | 0.18      | 0.165  |
| A025969_01 | 0.457    | 0.416    | 0.063     | 0.132     | 0.058     | -0.028 | -0.423    | -0.186 |
| A025970_01 | 0.176    | 0.229    | 0.027     | -0.19     | -0.19     | 0.011  | -0.139    | 0.002  |
| A025971_01 | 0.841    | 0.532    | 0.386     | -0.347    | 0.15      | 0.278  | 0.403     | 0.254  |
| A025975_01 | 0.654 NA |          | -0.212    | -0.764    | -0.098 NA |        | -0.101 NA |        |
| A025978_01 | 0.9      | 0.453    | -0.063    | -0.032    | 0.162     | 0.432  | 0.197     | 0.062  |
| A025984_01 | -0.371   | -0.327   | 0.034     | 0.059     | -0.796    | -1.086 | -0.163    | -0.025 |
| A025986_01 | 0.066    | 0.173    | 0.018     | -0.473    | 0.151     | 0.257  | 0.038     | 0.094  |
| A025990_01 | 0.111    | 0.031    | -0.296    | -0.374    | 0.233     | 0.208  | -0.1      | -0.097 |
| A025991_01 | -0.357   | -0.37    | -0.374    | 0.348     | -0.006    | 0.059  | -0.036    | -0.046 |
| A025992_01 | 0.053    | -0.128   | -0.171    | -0.631    | 0.27      | 0.145  | -0.317    | -0.228 |
| A025995_01 | 0.349    | 0.008    | 0.066     | -0.125    | 0.326     | 0.491  | 0.426     | 0.182  |
| A025997_01 | 0.611    | 0.471    | -0.13     | -0.161    | 0.354     | 0.747  | 0.017     | -0.006 |
| A025998_01 | 0.413    | 0.233    | 0.205     | -0.095    | 0.324     | 0.656  | -0.207    | -0.191 |
| A026002_01 | 0.816    | 0.622    | 1.159     | 0.68      | 0.454     | 0.734  | 0.554     | 0.385  |
| A026004_01 | -0.488   | -0.391   | -0.091    | -1.267    | -0.062    | -0.045 | 0.215     | 0.177  |
| A026013_01 | 0.244    | 0.295    | 0.098     | 0.403     | 0.008     | -0.188 | -0.131    | -0.126 |
| A026014_01 | 0.135    | 0.199    | 0.246     | 0.21      | 0.176     | 0.212  | 0.255     | 0.153  |
| A026015_01 | 0.563    | 0.818    | 0.258     | -0.021    | 0.196     | 0.301  | 0.054     | -0.015 |
| A026017_01 | 0.161    | 0.279    | -0.318    | -0.34     | 0.099     | 0.302  | -0.155    | -0.012 |
| A026024_01 | 0.247    | 0.373    | 0.191     | -0.18     | -0.066    | 0.187  | -0.105    | 0.042  |
| A026026_01 | 0.523    | 0.21     | -0.147    | -0.269 NA |           | 0.39   | 0.078     | 0.193  |
| A026043_01 | 0.432    | 0.479    | -0.28     | -0.644    | -0.12     | 0.075  | -0.411    | -0.311 |
| A026057_01 | 0.009    | -0.096   | 0.028     | -0.227    | 0.152     | 0.022  | 0.385     | 0.202  |
| A026062_01 | -0.257   | -0.794   | 0.277     | -0.013    | -0.076    | -0.566 | 0.106     | -0.151 |
| A026078_01 | 0.51     | 0.465    | -0.043    | -0.171    | 0.384     | 0.589  | 0.079     | -0.093 |
| A026081_01 | 0.463    | 0.472    | 0.707     | 0.521     | 0.21      | 0.299  | 0.417     | 0.29   |
| A026082_01 | -0.277   | -0.302   | -0.178    | 0.117     | 0.058     | -0.089 | -0.106    | -0.168 |
| A026083_01 | -0.004   | 0.168    | -0.003    | 0.079     | 0.218     | 0.118  | -0.264    | -0.279 |
| A026086_01 | 0.589    | 0.527    | 0.062     | -0.449    | 0.293     | 0.615  | 0.282     | 0.216  |
| A026087_01 | -0.423   | -0.325   | 0.034     | 0.423     | 0.284     | 0.237  | 0.392     | 0.292  |
| A026089_01 | -0.186   | -0.128   | -0.12     | -0.042    | -0.215    | -0.511 | -0.241    | -0.301 |
| A000178_01 | NA       | 0.455    | 0.288     | 0.754     | -0.146 NA |        | -0.402 NA |        |
| A000194_01 | NA       | 0.176    | -0.143 NA |           | -0.304 NA |        | -0.369 NA |        |
| A000195_01 | NA       | 0.178    | 0.189     | 0.829     | 0.252     | 0.259  | -0.189 NA |        |
| A000463_01 | NA       | 0.348    | 0.117     | -0.102    | -0.385 NA |        | 0.097     | 0.305  |
| A000605_01 | NA       | 0.162    | 0.292     | 0.351     | -0.016 NA |        | 0.067 NA  |        |
| A000683_01 | NA       | 0.112 NA |           | 0.435 NA  |           | 0.061  | -0.143 NA |        |
| A000724_01 | NA       | -0.054   | 0.291     | 0.127     | -0.048 NA |        | -0.071 NA |        |
| A000790_01 | NA       | NA       | -1.01     | -0.803    | -1.426    | -1.619 | -0.863    | -0.367 |
| A000902_01 | NA       | 0.042    | 0.19      | 0.012     | 0.282 NA  |        | 0.28      | 0.426  |
| A000979_01 | NA       | -0.077   | -0.161    | 0.541     | -0.235    | -0.015 | -0.188 NA |        |
| A001111_01 | NA       | NA       | -0.06 NA  |           | -0.424 NA |        | -0.148    | 0.497  |
| A001151_01 | NA       | NA       | -0.269    | -0.043    | -0.151 NA |        | -0.004 NA |        |
| A001316_01 | NA       | -0.472   | -0.132    | 0.105     | -0.314    | -0.414 | -0.009    | 0.057  |

|            |    |    |        |        |        |        |    |        |        |        |
|------------|----|----|--------|--------|--------|--------|----|--------|--------|--------|
| A001383_01 | NA |    | -0.225 | 0.131  | 0.332  | -0.189 | NA |        | -0.115 | NA     |
| A001433_01 | NA |    | 0.131  | 0.475  | 0.009  | 0.244  |    | 0.286  | 0.283  | 0.112  |
| A001509_01 | NA | NA |        | NA     | NA     | -0.391 | NA | NA     |        | 0.392  |
| A001594_01 | NA |    | 0.417  | 0.295  | 0.691  | -0.05  |    | 0.169  | 0.02   | 0.198  |
| A001600_01 | NA |    | -0.439 | -0.726 | 0.085  | -0.256 |    | 0.056  | -0.009 | 0.112  |
| A001888_01 | NA | NA |        | -0.082 | 0.261  | -0.214 | NA |        | -0.098 | NA     |
| A002042_01 | NA | NA |        | -0.765 | -0.047 | -0.35  | NA | NA     |        | NA     |
| A002060_01 | NA | NA |        | -0.725 | 0.052  | -0.032 | NA |        | -0.061 | NA     |
| A002084_01 | NA |    | -1.53  | NA     | NA     | -0.472 |    | -0.438 | 0.065  | NA     |
| A002107_01 | NA | NA |        | 0.031  | 0.15   | 0.045  | NA |        | 0.284  | NA     |
| A002404_01 | NA | NA |        | -0.295 | NA     | -0.216 | NA |        | 0.035  | NA     |
| A002434_01 | NA |    | 0.259  | -0.033 | 0.406  | -0.104 | NA |        | -0.107 | NA     |
| A002621_01 | NA |    | 0.418  | NA     | NA     | -0.265 | NA |        | -0.425 | 0.052  |
| A002778_01 | NA |    | -0.558 | -0.084 | -0.359 | -0.305 | NA | NA     |        | NA     |
| A002947_01 | NA |    | 0.413  | 0.088  | 0.099  | -0.263 |    | -0.03  | -0.155 | 0.163  |
| A003123_01 | NA | NA |        | -0.42  | -0.3   | -0.648 | NA |        | -0.122 | NA     |
| A003140_01 | NA |    | -0.803 | -0.955 | NA     | -0.201 | NA |        | -0.139 | NA     |
| A003218_01 | NA | NA |        | 0.29   | 0.412  | 0.073  | NA |        | 0.257  | 0.387  |
| A003526_01 | NA |    | -1.999 | NA     | NA     | -0.857 |    | -0.956 | -0.851 | NA     |
| A003659_01 | NA | NA |        | -0.076 | 0.158  | -0.318 | NA |        | -0.113 | -0.027 |
| A003766_01 | NA | NA |        | NA     |        | -0.847 |    | -0.575 | NA     | -0.152 |
| A003859_01 | NA | NA |        | 0.109  | 0.413  | NA     | NA |        | -0.395 | NA     |
| A004129_01 | NA |    | -0.164 | 0.444  | 0.705  | -0.239 |    | -0.09  | 0.014  | 0.273  |
| A004135_01 | NA |    | 0.54   | -0.277 | -0.349 | -0.066 |    | 0.147  | -0.056 | 0.072  |
| A004159_01 | NA |    | 0.173  | -0.127 | -0.215 | -0.019 |    | 0.175  | 0.007  | 0.015  |
| A004334_01 | NA |    | -0.274 | 0.126  | 0.031  | -0.299 | NA |        | 0.08   | NA     |
| A004387_01 | NA |    | 0.264  | 0.289  | 0.221  | 0.393  | NA |        | 0.354  | NA     |
| A004423_01 | NA |    | -0.147 | 0.153  | -0.162 | 0.029  | NA |        | -0.072 | NA     |
| A004572_01 | NA | NA |        | -0.668 | -0.679 | 0      |    | 0.139  | 0.159  | 0.192  |
| A004660_01 | NA |    | 0.042  | 0.236  | 0.43   | 0.125  | NA |        | 0.335  | NA     |
| A004672_01 | NA |    | 0.175  | 0.093  | 0.135  | 0.106  | NA |        | 0.348  | NA     |
| A004702_01 | NA | NA |        | -0.349 | 0.236  | -0.19  | NA |        | -0.299 | NA     |
| A004773_01 | NA |    | 0.078  | 0.021  | 0.03   | -0.148 |    | -0.102 | -0.144 | NA     |
| A005189_01 | NA |    | 0.116  | 0.251  | 0.445  | -0.38  | NA |        | -0.287 | NA     |
| A005374_01 | NA |    | -0.028 | NA     | -0.239 | -0.14  | NA |        | -0.06  | 0.154  |
| A005392_01 | NA | NA |        | NA     | NA     | -2.721 | NA | NA     |        | -1.629 |
| A005515_01 | NA |    | 0.014  | 0.123  | 0.14   | -0.03  |    | -0.054 | -0.085 | NA     |
| A005561_01 | NA |    | 0.148  | 0.055  | 0.032  | -0.122 |    | 0.235  | 0.087  | 0.062  |
| A005682_01 | NA |    | -0.448 | -0.585 | 0.365  | 0.021  | NA |        | -0.345 | NA     |
| A005848_01 | NA | NA |        | 0.006  | 0.533  | -0.087 | NA |        | -0.089 | -0.168 |
| A006047_01 | NA | NA |        | 0.096  | 0.165  | 0.271  | NA |        | 0.365  | 0.26   |
| A006139_01 | NA |    | 0.297  | 0.516  | 0.382  | -0.212 | NA |        | 0.175  | 0.066  |
| A006166_01 | NA | NA |        | NA     | -2.588 | -1.884 | NA |        | -1.257 | -1.017 |
| A006192_01 | NA | NA |        | -0.354 | 0.05   | 0.028  | NA |        | -0.203 | NA     |
| A006198_01 | NA |    | 0.315  | 0.048  | 0.536  | 0.182  | NA |        | 0.077  | NA     |
| A006299_01 | NA |    | -0.159 | -1.028 | -1.576 | -0.166 | NA |        | -0.521 | NA     |
| A006359_01 | NA | NA |        | NA     | 0.149  | -0.156 | NA |        | 0.161  | NA     |
| A006535_01 | NA |    | 0.068  | 0.033  | 0.338  | 0.183  | NA |        | -0.054 | -0.013 |
| A006561_01 | NA |    | 0.054  | NA     | NA     | -0.255 | NA |        | 0.097  | NA     |
| A006584_01 | NA | NA |        | 0.175  | NA     | -0.52  | NA |        | -0.21  | NA     |
| A006587_01 | NA | NA |        | 0      | NA     | -0.011 | NA |        | -0.064 | NA     |
| A006588_01 | NA | NA |        | -0.131 | 0.069  | 0.053  |    | 0.025  | -0.153 | NA     |
| A006590_01 | NA |    | 0.447  | 0.023  | 0.064  | 0.046  | NA |        | -0.141 | NA     |
| A006602_01 | NA | NA |        | -0.417 | 0.364  | 0.019  | NA |        | -0.269 | NA     |
| A006638_01 | NA |    | -0.185 | -0.465 | 0.085  | -0.223 | NA |        | -0.485 | NA     |
| A006655_01 | NA |    | 0.347  | 0.429  | NA     | -0.037 | NA |        | -0.299 | NA     |
| A006661_01 | NA |    | 0.52   | 0.292  | 0.315  | 0.074  |    | 0.367  | 0.16   | 0.242  |
| A006741_01 | NA | NA |        | 0.057  | -0.172 | -0.184 | NA |        | 0.185  | -0.004 |
| A006970_01 | NA |    | 0.562  | 0.333  | 0.813  | -0.055 |    | 0.067  | 0.318  | 0.375  |
| A007125_01 | NA |    | 0.075  | -0.787 | 0.524  | 0.103  |    | 0.467  | -0.811 | NA     |
| A007270_01 | NA |    | -0.042 | -0.019 | -0.162 | -0.126 |    | -0.219 | -0.156 | -0.269 |
| A007326_01 | NA |    | -0.141 | 0.016  | 0.002  | -0.297 | NA |        | 0.01   | NA     |
| A007344_01 | NA |    | -0.073 | -0.142 | 0.165  | 0.248  | NA |        | 0.033  | NA     |
| A007439_01 | NA |    | 0.354  | -0.181 | NA     | 0      | NA | NA     |        | NA     |
| A007540_01 | NA |    | -1.249 | -1.15  | -0.788 | -0.817 | NA |        | 0.075  | NA     |
| A007611_01 | NA |    | -0.114 | -0.149 | NA     | 0.136  | NA |        | 0.059  | NA     |
| A007679_01 | NA |    | -0.084 | 0.392  | NA     | -0.492 |    | 0.025  | -0.039 | 0.567  |
| A007700_01 | NA |    | -0.537 | -0.591 | 0.273  | -0.04  | NA |        | -0.312 | NA     |

|            |    |           |           |           |           |           |           |        |
|------------|----|-----------|-----------|-----------|-----------|-----------|-----------|--------|
| A007742_01 | NA | -0.319    | 0.602     | 0.637     | 0.089     | 0.096     | 0.409     | 0.325  |
| A007802_01 | NA | -0.101    | 0.031     | 0.037     | -0.088    | -0.292    | -0.081    | 0.174  |
| A007819_01 | NA | 0.09      | 0.086     | 0.285     | 0.034 NA  |           | -0.223 NA |        |
| A007828_01 | NA | -0.399    | -0.319    | 0.087     | -0.133    | -0.187    | 0.048     | 0.09   |
| A007839_01 | NA | -0.317    | 0.084     | 0.623     | -0.213    | -0.46     | -0.041    | 0.172  |
| A007867_01 | NA | 0.387     | 0.105     | 0.218     | 0.083 NA  |           | -0.135 NA |        |
| A007882_01 | NA | NA        | -0.107    | 0.104     | -0.134    | -0.026    | -0.289    | -0.1   |
| A007997_01 | NA | -0.322    | -0.243    | 0.042     | -0.424    | -0.684    | -0.405 NA |        |
| A008030_01 | NA | 0.399     | 0.034     | 0.034     | 0.047 NA  |           | 0.021     | -0.064 |
| A008034_01 | NA | NA        | -0.119    | -0.055    | 0.006 NA  |           | 0.265     | 0.149  |
| A008278_01 | NA | NA        | -0.177    | 0.089     | 0.107     | 0.086     | 0.029     | 0.168  |
| A008284_01 | NA | -1.436    | -1.185    | -0.609    | -0.787    | -0.906    | -0.349    | -0.081 |
| A008609_01 | NA | NA        | -0.047 NA |           | -0.098 NA |           | 0.04 NA   |        |
| A008620_01 | NA | -0.42     | -0.041    | 0.301     | -0.16     | -0.422    | 0.131 NA  |        |
| A008712_01 | NA | 0.645     | 0.867     | 0.978 NA  |           | 1.006     | -0.106    | -0.035 |
| A008935_01 | NA | 0.272     | 0.52      | 0.675     | 0.275 NA  |           | 0.606 NA  |        |
| A009025_01 | NA | NA        | NA        | NA        | -1.129 NA |           | -0.094 NA |        |
| A009197_01 | NA | -0.078    | -0.283    | 0.023     | -0.126 NA |           | -0.042 NA |        |
| A009232_01 | NA | NA        | 0.295     | 0.258     | 0.137 NA  |           | 0.311 NA  |        |
| A009254_01 | NA | 0.372     | -0.126    | 0.339     | 0.015     | -0.138    | -0.119    | -0.252 |
| A009259_01 | NA | -2.951    | -1.904    | -1.578    | -1.169    | -1.966    | -0.371    | -0.364 |
| A009332_01 | NA | NA        | NA        | NA        | NA        |           | -0.641    | -0.63  |
| A009654_01 | NA | -0.515    | -0.944    | -0.254    | 0.159 NA  |           | -0.206    | -0.149 |
| A009749_01 | NA | -0.18     | 0.027     | -0.167    | 0.093 NA  |           | -0.138 NA |        |
| A009945_01 | NA | NA        | -0.021    | -0.118    | -0.243 NA |           | 0.125     | 0.272  |
| A010046_01 | NA | 0.176     | 0.429     | 0.399     | 0.011     | 0.093     | -0.049 NA |        |
| A010070_01 | NA | -0.354    | 0.026     | -0.093    | -0.058    | -0.269    | 0.135 NA  |        |
| A010280_01 | NA | 0.424     | -0.018    | -0.513    | 0.185     | 0.113     | -0.056    | 0.078  |
| A010408_01 | NA | 0.024     | -0.289 NA |           | -0.081 NA | NA        | NA        |        |
| A010432_01 | NA | -0.132 NA |           | 0.157     | 0.002 NA  |           | -0.237 NA |        |
| A010479_01 | NA | -1.015    | 0.106 NA  |           | -0.46     | -1.298    | 0.381 NA  |        |
| A010550_01 | NA | 0.377     | -0.348    | -0.04     | -0.006 NA |           | 0.007     | -0.194 |
| A010630_01 | NA | -0.335 NA | NA        |           | -0.005    | -0.108 NA |           | -0.03  |
| A010702_01 | NA | -0.213    | 0.158     | 0.269     | -0.112    | -0.287    | -0.124    | -0.127 |
| A010770_01 | NA | -0.039    | 0.398     | -0.346    | 0.073 NA  |           | 0.254     | 0.096  |
| A010800_01 | NA | -0.327    | -0.355    | -0.08     | -0.123 NA |           | -0.299 NA |        |
| A010889_01 | NA | -0.433    | 0.003 NA  |           | 0.275 NA  |           | 0.142 NA  |        |
| A010924_01 | NA | NA        | -0.389    | 0.006     | -0.291 NA |           | -0.116    | -0.021 |
| A010967_01 | NA | NA        | NA        | NA        | -2.428 NA | NA        |           | -1.504 |
| A010984_01 | NA | -0.283    | -0.177    | -0.063    | 0.18 NA   |           | 0.094     | -0.034 |
| A010986_01 | NA | 0.129     | 0.072     | 0.222     | 0.119     | 0.31      | -0.115    | -0.105 |
| A011239_01 | NA | -0.17     | -0.412    | 0.037     | 0.023 NA  |           | 0.018 NA  |        |
| A011702_01 | NA | NA        | NA        | NA        | -1.246 NA |           | -1.109 NA |        |
| A011934_01 | NA | -0.758    | -0.28     | 0.26      | 0.117 NA  |           | -0.074 NA |        |
| A011958_01 | NA | 0.345     | 0.032     | -0.134    | 0.074 NA  |           | 0.03      | 0.075  |
| A012029_01 | NA | -0.342    | 0.69      | 0.582     | 0.149 NA  |           | 0.432     | 0.214  |
| A012053_01 | NA | -0.472    | 0.042 NA  |           | -0.127    | -0.303    | -0.147 NA |        |
| A012261_01 | NA | -0.312    | -0.334    | 0.107     | 0.117 NA  |           | 0.223     | 0.105  |
| A012345_01 | NA | NA        | 0.411     | -0.013 NA | NA        |           | 0.069     | 0.066  |
| A012409_01 | NA | 0.996     | 0.202     | 0.019     | 0.471     | 0.823     | 0.089 NA  |        |
| A012427_01 | NA | 0.165     | -0.235    | -0.451    | 0.153 NA  |           | 0.243 NA  |        |
| A012433_01 | NA | NA        | 0.183 NA  |           | -0.458    | -0.072    | -0.205    | 0.343  |
| A012676_01 | NA | -0.183    | -0.118    | 0.441     | -0.003    | -0.136    | 0.443     | 0.335  |
| A012743_01 | NA | -0.09     | -0.427    | -0.031    | 0.252     | 0.214     | 0.214     | 0.079  |
| A013121_01 | NA | NA        | -0.303    | -0.73     | -0.062 NA |           | -0.488 NA |        |
| A013400_01 | NA | NA        | 0.128     | 0.204     | 0.538 NA  |           | 0.37      | 0.139  |
| A013826_01 | NA | 0.328     | 0.5       | -0.023    | 0.14      | 0.256     | 0.094     | -0.021 |
| A014261_01 | NA | NA        | -0.302    | -0.238    | 0.047 NA  |           | -0.076    | -0.106 |
| A014327_01 | NA | NA        | 0.203     | -0.238    | -0.125 NA |           | 0.395 NA  |        |
| A014482_01 | NA | -0.113    | 0.082     | -0.198    | -0.042 NA |           | 0.133     | -0.277 |
| A015221_01 | NA | 0.148     | 0.117     | 0.258 NA  |           | 0.195     | 0.181     | 0.199  |
| A015419_01 | NA | -0.551    | 0.22      | 0.462     | -0.606 NA |           | -0.309 NA |        |
| A015597_01 | NA | -0.285    | 0.021     | 0.377     | -0.087    | -0.447    | -0.148 NA |        |
| A015680_01 | NA | -0.148    | 0.098     | 0.053     | 0.299 NA  |           | 0.166 NA  |        |
| A015726_01 | NA | -0.425 NA |           | -0.146    | -0.012    | -0.27     | 0.158     | 0.149  |
| A015821_01 | NA | NA        | -0.366    | -0.259    | 0.126 NA  |           | -0.111    | -0.259 |
| A015829_01 | NA | 0.031     | 0.158     | 0.025     | 0.044 NA  |           | 0.059 NA  |        |
| A016078_01 | NA | NA        | 0.007     | 0.077     | 0.089 NA  |           | -0.073 NA |        |

|            |    |        |        |        |        |        |        |        |
|------------|----|--------|--------|--------|--------|--------|--------|--------|
| A016171_01 | NA | NA     | NA     | NA     | -1.638 | NA     | -1.018 | -0.632 |
| A016256_01 | NA | -1.219 | -0.3   | -0.081 | -0.303 | NA     | 0.245  | 0.091  |
| A016280_01 | NA | -0.412 | NA     | NA     | -0.045 | NA     | NA     | NA     |
| A016737_01 | NA | 0.217  | -0.245 | 0.065  | -0.083 | 0.021  | -0.194 | -0.149 |
| A016743_01 | NA | NA     | 0.024  | 0.384  | -0.261 | NA     | -0.139 | NA     |
| A016766_01 | NA | -1.44  | NA     | -0.937 | -0.639 | NA     | -0.563 | NA     |
| A016874_01 | NA | -0.512 | -0.52  | -0.367 | -0.395 | NA     | 0.21   | NA     |
| A016906_01 | NA | -1.294 | -2.652 | -3.038 | -0.471 | NA     | -2.336 | -1.347 |
| A016921_01 | NA | -0.013 | -0.614 | -0.056 | 0.039  | NA     | -0.286 | NA     |
| A016963_01 | NA | 0.153  | 0.354  | NA     | 0.38   | NA     | 0.242  | NA     |
| A017319_01 | NA | -0.901 | -0.215 | -0.927 | -0.242 | -0.184 | 0.225  | NA     |
| A017543_01 | NA | NA     | 0.253  | NA     | NA     | 0      | -0.222 | -0.25  |
| A017592_01 | NA | 0.213  | -0.021 | 0.14   | 0.075  | NA     | -0.2   | NA     |
| A017615_01 | NA | NA     | -0.408 | -0.452 | 0.005  | NA     | 0.642  | 0.321  |
| A017639_01 | NA | NA     | -0.027 | -0.359 | NA     | -0.845 | -0.175 | -0.167 |
| A017675_01 | NA | 0.281  | -0.043 | 0.454  | -0.071 | NA     | -0.292 | NA     |
| A017696_01 | NA | -0.38  | -0.674 | -0.903 | -0.213 | NA     | -0.598 | -0.737 |
| A017708_01 | NA | NA     | NA     | -0.968 | -0.009 | NA     | -0.253 | NA     |
| A018180_01 | NA | -0.451 | -0.513 | -0.435 | -0.324 | NA     | -0.221 | NA     |
| A018346_01 | NA | -0.205 | 0.399  | 0.224  | -0.018 | NA     | -0.25  | NA     |
| A018376_01 | NA | NA     | -0.011 | 0.1    | 0.151  | NA     | -0.088 | NA     |
| A018459_01 | NA | -0.19  | -0.228 | -0.02  | 0.102  | -0.066 | -0.067 | NA     |
| A018525_01 | NA | -0.16  | NA     | 0.142  | 0.029  | -0.049 | NA     | NA     |
| A018642_01 | NA | -0.132 | 0.05   | 0.571  | 0.17   | -0.05  | 0.587  | 0.241  |
| A018791_01 | NA | 0.201  | 0.156  | 0.26   | -0.232 | -0.019 | 0.081  | 0.102  |
| A018839_01 | NA | -0.061 | 0.297  | NA     | -0.006 | NA     | 0.037  | NA     |
| A019083_01 | NA | -0.093 | -0.119 | -0.732 | -0.135 | -0.136 | -0.008 | NA     |
| A019129_01 | NA | -0.16  | 0.091  | 0.154  | 0.418  | 0.046  | 0.216  | NA     |
| A019148_01 | NA | -0.512 | -0.062 | -0.207 | 0.199  | 0.004  | 0.304  | 0.03   |
| A019207_01 | NA | 0.005  | NA     | -0.127 | 0.064  | NA     | 0.05   | NA     |
| A019260_01 | NA | NA     | -0.265 | -0.443 | 0.301  | 0.095  | -0.098 | -0.471 |
| A019316_01 | NA | 0.28   | -0.311 | -0.157 | 0.063  | NA     | 0.104  | -0.045 |
| A019339_01 | NA | -0.064 | -0.207 | 0.062  | 0.408  | -0.125 | -0.081 | -0.424 |
| A019441_01 | NA | -0.236 | -0.097 | 0.191  | -0.252 | -0.164 | -0.056 | 0.146  |
| A019481_01 | NA | 0.16   | -0.281 | -0.177 | 0.142  | NA     | -0.078 | -0.197 |
| A019507_01 | NA | 0.051  | NA     | 0.192  | 0.216  | 0.348  | -0.068 | NA     |
| A019546_01 | NA | -0.011 | -0.114 | 0.09   | 0.191  | NA     | 0.561  | NA     |
| A019605_01 | NA | -0.238 | 0.041  | 0.334  | -0.226 | -0.243 | -0.215 | NA     |
| A019623_01 | NA | -0.234 | -0.375 | -0.543 | 0.048  | NA     | -0.175 | NA     |
| A019735_01 | NA | -0.334 | 0.405  | 0.211  | 0.08   | -0.057 | 0.492  | 0.51   |
| A019790_01 | NA | NA     | NA     | NA     | -2.238 | -3.27  | NA     | -2.151 |
| A019856_01 | NA | -3.314 | NA     | NA     | -2.088 | -3.015 | NA     | NA     |
| A019860_01 | NA | -0.639 | -0.565 | 0.199  | -0.4   | NA     | -0.486 | NA     |
| A019961_01 | NA | -0.497 | -0.107 | -0.178 | -0.126 | -0.208 | 0.013  | -0.075 |
| A020003_01 | NA | -0.166 | 0.211  | -0.029 | 0.118  | -0.15  | 0.068  | NA     |
| A020052_01 | NA | 0.091  | 0.258  | 0.767  | -0.285 | NA     | 0.38   | 0.243  |
| A020094_01 | NA | -0.326 | -0.052 | 0.281  | -0.128 | -0.293 | 0.009  | -0.031 |
| A020163_01 | NA | NA     | -0.333 | -0.094 | -0.385 | -0.23  | -0.181 | -0.328 |
| A020252_01 | NA | 0.084  | 0.259  | 0.518  | 0.451  | NA     | 0.291  | NA     |
| A020391_01 | NA | -0.225 | 0.022  | 0.126  | NA     | NA     | -0.2   | -0.301 |
| A020483_01 | NA | NA     | NA     | -0.078 | -0.209 | NA     | NA     | 0.018  |
| A020662_01 | NA | 0.312  | 0.016  | -0.332 | 0.386  | NA     | 0.137  | NA     |
| A020698_01 | NA | -0.522 | -0.486 | -0.612 | -0.266 | NA     | -0.089 | -0.022 |
| A020745_01 | NA | -0.1   | -0.389 | NA     | 0.124  | 0.13   | NA     | NA     |
| A020865_01 | NA | NA     | -2.378 | -2.797 | -0.312 | -1.15  | -0.585 | -0.422 |
| A020875_01 | NA | -0.222 | NA     | 0.079  | -0.092 | -0.239 | 0.085  | NA     |
| A020877_01 | NA | -2.348 | -2.3   | -2.177 | -1.685 | -2.21  | -0.01  | -0.108 |
| A020895_01 | NA | -0.093 | 0.131  | 0.015  | 0.097  | NA     | 0.257  | -0.088 |
| A020989_01 | NA | NA     | 0.16   | 0.579  | 0.317  | 0.37   | 0.308  | NA     |
| A021075_01 | NA | -0.224 | -0.069 | -0.248 | 0.03   | NA     | 0.207  | -0.119 |
| A021101_01 | NA | -0.072 | -0.079 | 0.076  | -0.129 | NA     | 0.426  | NA     |
| A021199_01 | NA | -0.381 | 0.248  | 0.213  | 0.135  | -0.051 | 0.469  | 0.387  |
| A021203_01 | NA | 0.187  | NA     | -0.479 | -0.106 | -0.181 | -0.069 | -0.249 |
| A021404_01 | NA | -0.383 | -0.931 | -0.76  | -0.036 | NA     | -0.393 | -0.411 |
| A021457_01 | NA | -0.146 | 0.141  | NA     | -0.124 | -0.184 | -0.114 | NA     |
| A021598_01 | NA | NA     | 0.112  | 0.085  | -0.181 | NA     | 0.13   | -0.015 |
| A021618_01 | NA | -0.845 | -0.69  | -0.738 | 0.081  | -0.115 | -0.041 | -0.202 |
| A021825_01 | NA | -1.85  | NA     | -0.86  | -0.913 | -1.509 | NA     | NA     |



|            |    |    |        |        |        |        |        |        |        |
|------------|----|----|--------|--------|--------|--------|--------|--------|--------|
| A021855_01 | NA |    | -0.605 | -0.096 | 0.062  | 0.097  | NA     | 0.213  | NA     |
| A022122_01 | NA | NA |        | NA     | NA     | -0.946 | NA     | -1.286 | NA     |
| A022228_01 | NA | NA |        | -0.221 | -0.172 | 0.162  | -0.115 | 0.078  | 0.048  |
| A022508_01 | NA |    | -0.218 | -0.179 | 0.063  | 0.107  | 0.042  | 0.063  | NA     |
| A022526_01 | NA |    | 0.32   | 0.074  | -0.685 | -0.068 | NA     | 0.027  | NA     |
| A022621_01 | NA |    | 0.358  | 0.418  | -0.074 | 0.347  | NA     | -0.058 | NA     |
| A022710_01 | NA |    | 0.343  | 0.266  | -0.722 | 0.234  | 0.083  | -0.011 | -0.124 |
| A022924_01 | NA |    | 0.605  | -0.023 | 0.106  | 0.332  | NA     | -0.146 | NA     |
| A023591_01 | NA | NA |        | -1.132 | -0.69  | -0.183 | NA     | -0.107 | NA     |
| A023758_01 | NA |    | -1.505 | -0.318 | -0.469 | -0.727 | -0.712 | 0.56   | 0.734  |
| A023785_01 | NA |    | 0.064  | -0.151 | -0.095 | -0.181 | NA     | -0.205 | NA     |
| A023963_01 | NA | NA |        | -0.053 | 0.182  | -0.019 | NA     | -0.144 | NA     |
| A024087_01 | NA |    | -0.187 | -0.033 | -0.5   | -0.032 | NA     | 0.078  | NA     |
| A024254_01 | NA |    | -0.558 | -0.103 | -0.534 | 0.028  | -0.536 | 0.414  | NA     |
| A024432_01 | NA | NA |        | -0.64  | -0.87  | -0.076 | NA     | 0.149  | 0.203  |
| A024688_01 | NA | NA |        | -0.846 | -1.155 | 0.317  | NA     | -0.169 | -0.385 |
| A024828_01 | NA | NA |        | -0.029 | -0.325 | 0.217  | NA     | 0.294  | -0.069 |
| A024871_01 | NA |    | 0.151  | -0.17  | NA     | 0.12   | NA     | -0.068 | NA     |
| A025304_01 | NA | NA |        | 0.169  | -0.344 | 0.135  | NA     | 0.416  | 0.067  |
| A025505_01 | NA | NA |        | 0.124  | -0.433 | -0.081 | NA     | 0.158  | 0.028  |
| A025631_01 | NA |    | -0.183 | -0.31  | -0.222 | 0.084  | NA     | -0.351 | NA     |
| A025649_01 | NA | NA |        | 0.336  | NA     | 0.086  | -0.726 | -0.003 | NA     |
| A025888_01 | NA |    | -0.066 | NA     | NA     | 0.417  | -0.092 | NA     | -0.081 |
| A025917_01 | NA |    | -0.247 | 0.167  | -0.108 | 0.058  | 0.004  | 0.18   | -0.019 |
| A025993_01 | NA |    | -0.765 | -0.591 | -0.448 | -0.164 | NA     | -0.69  | NA     |
| A000832_01 | NA |    | 0.054  | -0.434 | -0.089 | 0.094  | 0.145  | -0.171 | 0.086  |
| A000983_01 | NA | NA | NA     |        | -1.19  | -1.471 | NA     | -1.283 | NA     |
| A001323_01 | NA |    | 0.088  | NA     | NA     | 0.238  | 0.09   | 0.096  | NA     |
| A001615_01 | NA | NA |        | -1.28  | -0.959 | -0.454 | NA     | -0.544 | -0.23  |
| A002100_01 | NA |    | -2.923 | -2.117 | -1.541 | -1.747 | -2.088 | -0.126 | -0.016 |
| A002428_01 | NA |    | -4.078 | NA     | NA     | -2.57  | NA     | -1.488 | -1.186 |
| A002959_01 | NA | NA |        | 0.046  | 0.025  | -0.233 | NA     | 0.285  | 0.348  |
| A003384_01 | NA | NA |        | -0.75  | -0.763 | -0.556 | NA     | -0.059 | NA     |
| A003432_01 | NA | NA | NA     |        | NA     | -1.806 | -1.727 | -0.731 | -0.337 |
| A003906_01 | NA | NA | NA     |        | NA     | -1.024 | NA     | -1.06  | NA     |
| A004158_01 | NA |    | 0.212  | 0.025  | 0.073  | -0.104 | NA     | 0.032  | 0.227  |
| A005016_01 | NA | NA |        | -1.154 | -0.578 | -0.337 | NA     | -0.503 | NA     |
| A006218_01 | NA |    | -2.283 | -0.655 | -0.725 | -0.812 | -1.238 | -0.131 | -0.151 |
| A006571_01 | NA |    | -0.001 | 0.175  | 0.421  | 0.164  | 0.322  | 0.381  | 0.376  |
| A007664_01 | NA | NA | NA     |        | -1.964 | -1.539 | NA     | -0.609 | -0.436 |
| A007996_01 | NA | NA |        | -0.201 | -0.163 | -0.286 | NA     | 0.329  | 0.285  |
| A008395_01 | NA |    | 0.284  | 0.346  | -0.096 | 0.45   | 0.66   | 0.471  | 0.171  |
| A009384_01 | NA |    | -2.36  | -2.857 | -2.939 | -1.794 | -2.211 | -0.766 | -0.51  |
| A010777_01 | NA | NA |        | -0.01  | 0.203  | 0.032  | NA     | 0.085  | 0.049  |
| A011549_01 | NA | NA | NA     |        | NA     | -1.127 | NA     | -0.515 | -0.407 |
| A012282_01 | NA | NA |        | -0.038 | 0.357  | 0.33   | 0.253  | 0.304  | 0.211  |
| A012617_01 | NA | NA | NA     |        | -0.296 | -0.09  | -0.42  | -0.193 | -0.226 |
| A014149_01 | NA | NA |        | -2.193 | -2.649 | -1.164 | NA     | -0.419 | -0.299 |
| A014237_01 | NA |    | -0.559 | NA     | NA     | -0.018 | -0.4   | NA     | -0.027 |
| A014458_01 | NA | NA | NA     |        | NA     | 0.272  | NA     | NA     | 0.22   |
| A014719_01 | NA |    | -2.818 | NA     |        | -1.524 | -1.795 | -0.783 | NA     |
| A014768_01 | NA |    | 0.095  | 0.214  | 0.155  | 0      | -0.029 | 0.31   | 0.192  |
| A015277_01 | NA |    | -0.813 | -0.444 | -0.443 | -0.095 | NA     | 0.166  | NA     |
| A015501_01 | NA | NA | NA     |        | -1.693 | -1.036 | NA     | -0.195 | -0.251 |
| A015891_01 | NA | NA | NA     |        | NA     | -0.701 | -1.369 | -0.698 | -0.61  |
| A016892_01 | NA | NA |        | -1.644 | NA     | -0.692 | NA     | -0.665 | NA     |
| A018578_01 | NA |    | -0.397 | -0.387 | NA     | 0.235  | NA     | -0.236 | NA     |
| A018773_01 | NA |    | -0.035 | -0.139 | 0.307  | 0.171  | 0.003  | 0      | -0.046 |
| A019147_01 | NA | NA |        | 0.222  | -0.187 | 0.321  | 0.331  | 0.059  | -0.183 |
| A019173_01 | NA |    | 0.452  | 0.381  | 0.159  | 0.091  | 0.007  | -0.009 | -0.123 |
| A020365_01 | NA |    | 0.412  | -0.216 | -0.732 | 0.278  | NA     | -0.204 | -0.21  |
| A020695_01 | NA | NA |        | 0.017  | 0.9    | 0.577  | 0.527  | 0.803  | 0.47   |
| A020773_01 | NA |    | -0.604 | -0.528 | -0.12  | 0.258  | 0.09   | 0.436  | 0.159  |
| A021007_01 | NA | NA | NA     |        | -2.843 | -0.838 | -1.375 | -1.736 | -1.26  |
| A021284_01 | NA |    | -0.178 | 0.31   | 0.517  | 0.041  | -0.061 | 0.364  | 0.107  |
| A021358_01 | NA |    | -0.299 | 0.19   | NA     | -0.007 | 0.015  | -0.002 | 0.157  |
| A021505_01 | NA |    | -1.481 | -0.793 | -0.83  | 0.048  | 0.229  | 0.314  | 0.252  |
| A021801_01 | NA | NA | NA     |        | NA     | -2.148 | NA     | -3.022 | -2.359 |

|            |    |    |        |        |        |        |        |        |        |
|------------|----|----|--------|--------|--------|--------|--------|--------|--------|
| A021844_01 | NA |    | -0.536 | NA     | NA     | -0.05  | -0.127 | -0.235 | -0.164 |
| A021861_01 | NA | NA |        | 0.176  | -0.288 | 0.218  | NA     | 0.301  | 0.363  |
| A021957_01 | NA | NA |        | 0.142  | 0.247  | 0.664  | 0.433  | 0.588  | 0.36   |
| A022288_01 | NA | NA | NA     | NA     | NA     | -2.25  | NA     | -0.628 | NA     |
| A022312_01 | NA | NA |        | -0.776 | -0.611 | 0.121  | NA     | -0.371 | -0.511 |
| A023427_01 | NA | NA | NA     | NA     | NA     | -2.134 | NA     | -1.433 | -1.168 |
| A023639_01 | NA | NA |        | -0.216 | 0.22   | 0.4    | NA     | 0.316  | NA     |
| A024654_01 | NA |    | -0.5   | 0.215  | -0.545 | 0.066  | -0.285 | 0.219  | -0.187 |
| A025744_01 | NA |    | 0.2    | -0.534 | -0.627 | 0.328  | -0.056 | -0.655 | -0.49  |
| A008108_01 | NA | NA |        | -1.956 | -1.848 | NA     | NA     | -0.452 | -0.283 |
| A011990_01 | NA |    | -0.447 | -0.515 | 0.017  | NA     | NA     | -0.062 | -0.315 |
| A018550_01 | NA | NA | NA     | NA     | NA     | NA     | 0.362  | 0.318  | 0.719  |
| A018865_01 | NA |    | -0.265 | -0.052 | -0.171 | NA     | 0.264  | -0.031 | -0.047 |
| A020743_01 | NA |    | -0.225 | 0.27   | -0.035 | NA     | NA     | 0.082  | 0.035  |
| A023790_01 | NA | NA | NA     | NA     | NA     | NA     | -0.385 | 0.029  | -0.135 |
| A023812_01 | NA | NA |        | 0.445  | NA     | NA     | 0.447  | 0.282  | 0.289  |
| A024387_01 | NA |    | -0.295 | -0.378 | -0.065 | NA     | 0.033  | 0.077  | 0.228  |
| A024446_01 | NA |    | -2.461 | -2.265 | -2.205 | NA     | -1.925 | -1.715 | -1.492 |
| A024462_01 | NA |    | -0.275 | 0.06   | 0.15   | NA     | -0.171 | -0.025 | NA     |
| A024556_01 | NA |    | -1.322 | -0.058 | 0.003  | NA     | -1.46  | -0.33  | -0.654 |
| A025800_01 | NA |    | 0.262  | 0.212  | 0.122  | NA     | 0.011  | 0.085  | -0.06  |
| A000741_01 | NA |    | 0.159  | 0.267  | 0.3    | NA     | 0.115  | 0.02   | 0.129  |
| A020770_01 | NA | NA |        | -4.555 | -4.647 | NA     | NA     | -3.592 | -2.309 |
| A001491_01 | NA |    | -1.31  | -0.479 | -0.93  | NA     | -0.4   | -0.085 | -0.093 |
| A000015_01 | NA |    | -0.242 | -0.533 | 0.528  | NA     | -0.804 | -0.656 | NA     |
| A000400_01 | NA |    | 0.244  | 0.013  | 0.172  | NA     | 0.32   | 0.209  | 0.057  |
| A000418_01 | NA |    | -0.27  | -0.249 | 0.245  | NA     | -0.153 | -0.203 | -0.054 |
| A000448_01 | NA |    | 0.26   | -0.036 | -0.187 | NA     | 0.45   | 0.178  | 0.312  |
| A000745_01 | NA |    | -0.049 | -0.176 | -0.27  | NA     | -0.165 | -0.131 | -0.155 |
| A000942_01 | NA |    | 0.277  | -0.208 | 0.034  | NA     | 0.48   | -0.181 | 0.085  |
| A001047_01 | NA |    | 0.024  | 0.186  | 0.61   | NA     | 0.031  | 0.195  | 0.251  |
| A001349_01 | NA |    | 0.362  | -0.235 | -0.208 | NA     | 0.219  | 0.12   | 0.203  |
| A001364_01 | NA |    | -0.22  | -0.264 | -0.104 | NA     | -0.112 | -0.153 | -0.103 |
| A001393_01 | NA |    | 0.032  | -0.534 | -0.215 | NA     | -0.466 | -0.489 | -0.223 |
| A001427_01 | NA |    | -0.398 | -0.203 | -0.009 | NA     | -0.159 | -0.098 | 0.049  |
| A001475_01 | NA |    | 0.213  | 0.011  | 0.057  | NA     | 0.083  | 0.042  | -0.125 |
| A001493_01 | NA |    | -0.139 | 0.093  | 0.137  | NA     | -0.11  | -0.224 | -0.079 |
| A001569_01 | NA |    | 0.305  | -0.242 | 0.184  | NA     | 0.051  | -0.483 | -0.189 |
| A002091_01 | NA |    | 0.151  | 0.005  | 0.152  | NA     | -0.01  | -0.058 | 0.249  |
| A002115_01 | NA |    | 0.096  | 0.074  | 0.134  | NA     | 0.083  | 0.184  | -0.052 |
| A002139_01 | NA |    | 0.457  | 0.453  | -0.21  | NA     | 0.093  | 0.102  | 0.058  |
| A002163_01 | NA |    | 0.361  | -0.13  | 0.11   | NA     | -0.086 | -0.044 | 0.079  |
| A002347_01 | NA | NA | NA     | NA     | NA     | NA     | 0.086  | 0.246  | 0.641  |
| A002358_01 | NA |    | -0.018 | -0.176 | 0.495  | NA     | 0.119  | -0.488 | -0.147 |
| A002438_01 | NA |    | -0.156 | -0.379 | -0.295 | NA     | 0.044  | -0.275 | 0.044  |
| A002620_01 | NA |    | -0.551 | -0.515 | -0.207 | NA     | -0.57  | -0.465 | -0.148 |
| A003454_01 | NA |    | 0.261  | 0.129  | 0.388  | NA     | 0.061  | -0.114 | NA     |
| A004153_01 | NA |    | -0.346 | -0.035 | -0.087 | NA     | 0.136  | 0.015  | 0.087  |
| A004340_01 | NA |    | 0.402  | 0.224  | 0.234  | NA     | 0.067  | -0.163 | -0.273 |
| A004366_01 | NA |    | -0.433 | -0.114 | 0.522  | NA     | -0.173 | -0.149 | -0.214 |
| A004544_01 | NA |    | -0.14  | -0.223 | -0.157 | NA     | 0.05   | -0.06  | 0.007  |
| A004681_01 | NA |    | -0.108 | 0.517  | 0.067  | NA     | -0.074 | 0.247  | 0.092  |
| A004767_01 | NA |    | 0.146  | -0.394 | -0.317 | NA     | 0.608  | 0.035  | NA     |
| A004957_01 | NA |    | -0.836 | -0.714 | -0.584 | NA     | 0.018  | -0.146 | -0.104 |
| A004958_01 | NA |    | -0.132 | 0.223  | 0.287  | NA     | 0.204  | -0.138 | -0.109 |
| A004969_01 | NA |    | -0.233 | -0.138 | -0.303 | NA     | NA     | -0.307 | NA     |
| A005896_01 | NA |    | -0.4   | -0.398 | -0.329 | NA     | -0.088 | -0.216 | -0.022 |
| A005927_01 | NA |    | -0.052 | -0.015 | 0.002  | NA     | 0.192  | -0.246 | -0.321 |
| A005993_01 | NA |    | -0.947 | -0.104 | 0.205  | NA     | -1.012 | -0.18  | -0.084 |
| A006010_01 | NA |    | -0.053 | -0.079 | 0.23   | NA     | 1.171  | 0.414  | 0.675  |
| A006113_01 | NA |    | 0.172  | 0.017  | -0.98  | NA     | 0.165  | 0.146  | 0.025  |
| A006404_01 | NA |    | 0.104  | 0.199  | -0.051 | NA     | 0.061  | -0.086 | 0.059  |
| A006526_01 | NA |    | -1.675 | -0.822 | -0.891 | NA     | -1.419 | -1.189 | -0.941 |
| A006614_01 | NA |    | 0.057  | -0.241 | 0.11   | NA     | 0.358  | -0.112 | -0.004 |
| A006812_01 | NA |    | -0.147 | -0.537 | -0.385 | NA     | 0.127  | 0.067  | 0.062  |
| A006983_01 | NA |    | -0.189 | -0.418 | -0.378 | NA     | -0.134 | -0.17  | -0.181 |
| A007065_01 | NA |    | 0.669  | 0.478  | 1.122  | NA     | -0.007 | 0.457  | NA     |
| A007160_01 | NA |    | 0.684  | 0.389  | 1.095  | NA     | 0.008  | 0.499  | 0.377  |

|            |    |        |        |        |    |        |        |        |
|------------|----|--------|--------|--------|----|--------|--------|--------|
| A007253_01 | NA | -1.443 | -0.897 | -1.049 | NA | -0.761 | -0.427 | -0.47  |
| A007301_01 | NA | 0.256  | 0.029  | -0.077 | NA | 0.57   | 0.074  | -0.102 |
| A007345_01 | NA | 0.223  | 0.286  | 0.113  | NA | 0.044  | 0.173  | -0.043 |
| A007579_01 | NA | 0.337  | 0.262  | 0.475  | NA | -0.066 | 0.46   | 0.5    |
| A007731_01 | NA | 0.063  | 0.09   | -0.082 | NA | -0.072 | -0.057 | -0.086 |
| A007737_01 | NA | 0.118  | -0.067 | 0.326  | NA | -0.221 | -0.057 | -0.005 |
| A008444_01 | NA | 0.168  | -0.081 | 0.499  | NA | 0.189  | 0.056  | 0.008  |
| A008462_01 | NA | -0.227 | -0.165 | -0.28  | NA | -0.018 | 0.052  | 0.087  |
| A009204_01 | NA | 0.408  | 0.512  | 0.252  | NA | -0.123 | 0.365  | 0.211  |
| A009242_01 | NA | 0.01   | 0.222  | 0.299  | NA | 0.24   | 0.13   | 0.129  |
| A009243_01 | NA | 0.175  | 0.104  | -0.167 | NA | 0.132  | 0.061  | 0.012  |
| A009644_01 | NA | -0.103 | -0.221 | -0.047 | NA | -0.175 | -0.27  | NA     |
| A009651_01 | NA | -0.034 | 0.317  | -0.076 | NA | 0.014  | -0.167 | 0.104  |
| A009685_01 | NA | -0.799 | -0.276 | -0.196 | NA | -0.335 | 0.195  | 0.025  |
| A009717_01 | NA | -1.31  | -0.821 | -0.706 | NA | -0.59  | 0.279  | 0.179  |
| A009718_01 | NA | 0.617  | 0.105  | 0.239  | NA | -0.037 | -0.126 | -0.156 |
| A009724_01 | NA | -0.194 | 0.24   | 0.629  | NA | 0.112  | -0.025 | 0.175  |
| A010662_01 | NA | -0.987 | -0.425 | -0.254 | NA | -0.6   | -0.267 | NA     |
| A011147_01 | NA | -0.118 | 0.138  | -0.049 | NA | -0.237 | 0.049  | 0.114  |
| A011464_01 | NA | -0.397 | -0.42  | -0.29  | NA | 0.06   | -0.149 | -0.107 |
| A011466_01 | NA | 0.576  | 0.412  | -0.17  | NA | 0.224  | 0.05   | -0.063 |
| A011639_01 | NA | 0.324  | 0.023  | -0.397 | NA | 0.292  | 0.03   | 0.046  |
| A011648_01 | NA | -0.057 | -0.074 | -0.041 | NA | 0.007  | -0.007 | -0.109 |
| A011649_01 | NA | 0.178  | -0.007 | 0.295  | NA | 0.086  | -0.288 | -0.425 |
| A011737_01 | NA | -0.089 | 0.18   | -0.31  | NA | 0.099  | 0.555  | 0.388  |
| A011739_01 | NA | -0.284 | -0.337 | 0.183  | NA | -0.1   | -0.29  | -0.121 |
| A011796_01 | NA | -0.591 | -0.171 | 0.137  | NA | -0.095 | -0.165 | -0.204 |
| A011824_01 | NA | 0.444  | 0.423  | 0.212  | NA | -0.05  | 0.107  | -0.046 |
| A012405_01 | NA | -0.128 | -0.134 | -0.128 | NA | 0.083  | 0.119  | 0.184  |
| A012825_01 | NA | 0.358  | 0.082  | 0.002  | NA | 0.318  | 0.231  | 0.801  |
| A012892_01 | NA | -0.55  | -0.427 | 0.445  | NA | -0.132 | -0.363 | -0.362 |
| A013060_01 | NA | -0.23  | -0.181 | -0.322 | NA | -0.021 | 0.14   | 0.026  |
| A013531_01 | NA | -0.12  | 0.771  | 0.503  | NA | -0.253 | 0.576  | NA     |
| A013767_01 | NA | -0.619 | 0.178  | 0.408  | NA | -0.049 | -0.205 | -0.254 |
| A013865_01 | NA | -0.269 | -0.212 | 0.004  | NA | -0.039 | 0.044  | 0.008  |
| A013881_01 | NA | -0.065 | 0.272  | 0.432  | NA | 0.197  | -0.17  | 0.116  |
| A014044_01 | NA | -0.423 | -0.194 | 0.034  | NA | -0.052 | 0.064  | 0.123  |
| A014689_01 | NA | 0.359  | 0.335  | 0.318  | NA | 0.083  | 0.213  | 0.148  |
| A014744_01 | NA | -1.787 | -1.179 | -1.305 | NA | -1.876 | -0.59  | -0.37  |
| A014791_01 | NA | 0.549  | -0.39  | -0.345 | NA | 0.291  | -0.303 | -0.153 |
| A014967_01 | NA | 1.148  | 0.646  | 0.171  | NA | 0.568  | 0.422  | 0.435  |
| A015087_01 | NA | 0.023  | -0.335 | 0.173  | NA | NA     | 0.114  | NA     |
| A015212_01 | NA | 0.38   | 0.29   | -0.04  | NA | 0.441  | 0.061  | 0.093  |
| A015226_01 | NA | -0.995 | 0.939  | NA     | NA | -0.813 | 0.364  | -0.431 |
| A015340_01 | NA | 0.334  | 0.08   | -0.274 | NA | 0.168  | 0.023  | -0.002 |
| A015551_01 | NA | -0.478 | NA     | 0.259  | NA | -0.36  | NA     | -0.448 |
| A015561_01 | NA | 0.885  | 0.545  | 0.441  | NA | 0.386  | 0.362  | 0.408  |
| A015575_01 | NA | 0.093  | -0.224 | -0.148 | NA | 0.297  | -0.285 | -0.413 |
| A016276_01 | NA | -0.127 | 0.196  | 0.211  | NA | 0.001  | -0.138 | -0.224 |
| A016302_01 | NA | 0.336  | 0.609  | 0.31   | NA | 0.322  | -0.11  | -0.184 |
| A016527_01 | NA | -0.786 | -0.715 | -0.297 | NA | -1.126 | -0.653 | -0.817 |
| A017523_01 | NA | 0.043  | 0.305  | 0.207  | NA | -0.102 | 0.356  | 0.438  |
| A017547_01 | NA | -1.421 | -1.083 | -1.746 | NA | -1.093 | -0.78  | -0.67  |
| A017927_01 | NA | 0.247  | 0.292  | -0.177 | NA | 0.093  | 0.215  | 0.087  |
| A017943_01 | NA | 0.145  | -0.433 | -0.256 | NA | 0.36   | -0.187 | 0.016  |
| A018485_01 | NA | 0.577  | 0.61   | 0.189  | NA | 0.353  | 0.349  | 0.196  |
| A018705_01 | NA | -0.256 | -0.069 | -0.484 | NA | -0.177 | 0.037  | -0.082 |
| A018761_01 | NA | 0.003  | -0.05  | 0.295  | NA | 0.033  | -0.05  | -0.129 |
| A018765_01 | NA | -0.196 | -0.156 | -0.228 | NA | -0.256 | -0.258 | -0.259 |
| A018790_01 | NA | 0.145  | 0.091  | 0.134  | NA | -0.167 | 0.109  | 0.007  |
| A018794_01 | NA | 0.004  | -0.151 | 0.126  | NA | -0.07  | -0.015 | -0.115 |
| A018861_01 | NA | -0.422 | -0.013 | -0.087 | NA | -0.243 | -0.018 | -0.104 |
| A018876_01 | NA | 0.552  | 0.707  | 0.892  | NA | 0.743  | 0.545  | 0.888  |
| A019001_01 | NA | 0.366  | 0.053  | 0.133  | NA | -0.117 | -0.393 | -0.356 |
| A019031_01 | NA | -1.124 | -0.508 | 0.014  | NA | -0.655 | -0.348 | -0.239 |
| A019042_01 | NA | -0.18  | -0.146 | 0.124  | NA | -0.17  | -0.227 | -0.265 |
| A019054_01 | NA | -0.066 | -0.184 | 0.06   | NA | -0.098 | -0.062 | -0.107 |
| A019079_01 | NA | -1.826 | -1.272 | -1.407 | NA | -1.534 | -0.556 | -0.494 |

|            |    |        |        |        |    |        |        |        |
|------------|----|--------|--------|--------|----|--------|--------|--------|
| A019084_01 | NA | -0.09  | 0.276  | 0.166  | NA | -0.208 | 0.002  | -0.245 |
| A019125_01 | NA | 0.132  | 0.599  | 0.347  | NA | -0.03  | 0.437  | 0.35   |
| A019185_01 | NA | -0.192 | -0.17  | 0.203  | NA | -0.141 | -0.155 | -0.184 |
| A019226_01 | NA | 0.304  | 0.288  | -0.152 | NA | 0.211  | 0.119  | -0.11  |
| A019232_01 | NA | 0.744  | 0.286  | NA     | NA | 0.45   | 0.094  | -0.055 |
| A019280_01 | NA | 0.42   | 0.278  | -0.15  | NA | 0.072  | -0.193 | 0.192  |
| A019462_01 | NA | -0.144 | 0.041  | NA     | NA | 0.145  | 0.277  | NA     |
| A019792_01 | NA | -0.304 | 0.057  | -0.453 | NA | -0.108 | -0.163 | -0.126 |
| A019986_01 | NA | -0.51  | 0.221  | 0.025  | NA | -0.221 | 0.137  | 0.159  |
| A019992_01 | NA | -0.041 | 0.008  | 0.164  | NA | -0.131 | -0.138 | -0.019 |
| A019996_01 | NA | 0.185  | 0.167  | 0.081  | NA | 0.256  | -0.184 | -0.179 |
| A020426_01 | NA | -0.531 | 0.058  | 0.268  | NA | -0.363 | -0.071 | -0.155 |
| A020775_01 | NA | 0.125  | 0.133  | -0.139 | NA | 0.282  | 0.283  | 0.082  |
| A020779_01 | NA | -1.248 | 0.095  | 0.612  | NA | 0.449  | 0.663  | 0.529  |
| A021737_01 | NA | 0.035  | NA     | 0.312  | NA | 0.044  | NA     | -0.118 |
| A022056_01 | NA | -0.145 | 0.206  | 0.011  | NA | -0.001 | 0.141  | -0.091 |
| A022274_01 | NA | 0.178  | -0.125 | 0.02   | NA | NA     | -0.031 | -0.102 |
| A023555_01 | NA | 0.137  | 0.294  | NA     | NA | -0.051 | 0.122  | -0.168 |
| A024044_01 | NA | 0.086  | 0.02   | -0.179 | NA | -0.06  | -0.076 | -0.034 |
| A024170_01 | NA | -0.263 | NA     | 0.219  | NA | 0.265  | 0.492  | 0.282  |
| A024467_01 | NA | -0.951 | 0.01   | -0.167 | NA | -0.589 | -0.242 | -0.017 |
| A024543_01 | NA | -0.379 | -1.25  | -0.613 | NA | 0.161  | -0.223 | -0.227 |
| A024776_01 | NA | -0.157 | 0.176  | 0.101  | NA | -0.086 | 0.142  | 0.029  |
| A025167_01 | NA | 0.313  | -0.198 | -0.901 | NA | 0.355  | -0.176 | -0.097 |
| A025902_01 | NA | 0.057  | 0.01   | -0.252 | NA | 0.129  | 0.271  | 0.176  |
| A026000_01 | NA | -0.112 | -0.799 | -1.153 | NA | -0.052 | -0.521 | -0.524 |
| A026032_01 | NA | -0.272 | -0.379 | -0.227 | NA | 0.18   | 0.047  | 0.048  |
| A000572_01 | NA | 0.385  | 0.072  | -0.356 | NA | 0.562  | 0.024  | 0.339  |
| A004818_01 | NA | 0.297  | -0.039 | -0.095 | NA | 0.222  | 0.104  | 0.182  |
| A005988_01 | NA | 0.437  | -0.613 | -0.891 | NA | 0.518  | -0.517 | -0.311 |
| A006161_01 | NA | -0.172 | -0.185 | -0.356 | NA | 0.38   | 0.28   | 0.159  |
| A007292_01 | NA | 0.202  | 0.29   | 0.344  | NA | -0.094 | 0.554  | 0.371  |
| A007713_01 | NA | 0.754  | 0.216  | 0.338  | NA | -0.078 | -0.052 | 0.093  |
| A009463_01 | NA | -0.383 | -0.328 | -0.233 | NA | -0.022 | -0.168 | -0.129 |
| A011646_01 | NA | 0.181  | -0.251 | -0.18  | NA | 0.23   | 0.037  | 0.031  |
| A012457_01 | NA | NA     | 0.258  | 0.407  | NA | -0.164 | 0.548  | 0.21   |
| A012674_01 | NA | -1.657 | -1.375 | -1.662 | NA | -0.637 | -1.024 | -0.688 |
| A016524_01 | NA | 0.782  | 0.33   | -0.644 | NA | 0.531  | 0.196  | NA     |
| A017134_01 | NA | 0.119  | -0.167 | -0.522 | NA | 0.233  | 0.008  | -0.155 |
| A018784_01 | NA | -0.291 | -0.261 | -0.124 | NA | -0.081 | 0.591  | 0.312  |
| A019101_01 | NA | 0.171  | 0.079  | 0.14   | NA | 0.561  | 0.227  | 0.184  |
| A020277_01 | NA | 0.378  | -0.178 | -0.436 | NA | 0.435  | -0.064 | 0.011  |
| A024469_01 | NA | 0.577  | 0.726  | 0.666  | NA | 0.891  | 0.772  | 0.694  |
| A024824_01 | NA | -0.165 | 0.098  | 0.026  | NA | NA     | 0.039  | -0.225 |
| A005098_01 | NA | NA     | NA     | 0.202  | NA | NA     | -0.29  | 0.018  |

| Oligo ID   | 6-7 DPA A | 6-7 DPA A dye swap | 6-7 DPA B | 6-7 DPA B dye swap | 8-9 DPA A | 8-9 DPA A dye swap | 8-9 DPA B | 8-9 DPA B dye swap |
|------------|-----------|--------------------|-----------|--------------------|-----------|--------------------|-----------|--------------------|
| A000001_01 | 0.146     | 0.118              | -0.393    | -0.162             | -0.37     | -0.297             | -0.386    | -0.387             |
| A000002_01 | 0.064     | 0.389              | -0.025    | 0.301              | -0.105    | 0.064 NA           |           | 0.268              |
| A000003_01 | -0.164    | 0.056              | -0.522    | -0.19              | -0.208    | 0.112              | -0.003    | 0.436              |
| A000004_01 | 0.264     | 0.219              | -0.134    | -0.069             | -0.072    | 0.003              | 0.032     | 0.145              |
| A000006_01 | -0.156    | 0.375              | 0.228     | 0.266 NA           |           | -1.126             | -0.156    | 0.012              |
| A000012_01 | -0.07     | 0.042              | -0.085    | -0.155             | -0.006    | -0.074             | -0.114    | 0.172              |
| A000013_01 | -0.057 NA |                    | -0.144    | 0.208 NA           |           | -0.049 NA          |           | 0.347              |
| A000016_01 | -0.126    | 0.012              | 0.143     | 0.146              | -0.389    | -0.347             | -0.082    | 0.216              |
| A000017_01 | 0.039     | 0.17               | 0.063     | 0.069              | -0.052    | -0.044             | 0.06      | 0.141              |
| A000020_01 | -0.266    | -0.043             | -0.308    | 0.007              | -0.028    | 0.102              | -0.215    | 0.077              |
| A000021_01 | -0.113    | 0.053              | -0.17     | -0.097             | -0.122    | -0.073             | 0.126     | 0.128              |
| A000022_01 | -0.072    | 0.147              | -0.19     | 0.17               | 0.08      | 0.432              | -0.227    | 0.095              |
| A000025_01 | 0.126     | 0.132              | -0.065    | 0.143              | -0.21     | -0.216             | 0.057     | 0.097              |
| A000026_01 | -0.172 NA |                    | -0.103    | 0.212              | -0.365    | -0.238             | -0.002    | 0.168              |
| A000027_01 | 0.162     | 0.264              | 0.279     | 0.562              | -0.117    | 0.163 NA           |           | NA                 |
| A000029_01 | -0.667    | -0.614             | -0.042    | 0.307              | -0.106    | -0.047 NA          |           | NA                 |
| A000031_01 | -1.347    | -0.994             | 0.664     | 0.873              | -0.344    | -0.295             | -0.756    | -0.688             |
| A000038_01 | -0.231    | 0.038              | 0.067     | -0.101             | 0.272     | 0.376              | 0.041     | 0.357              |
| A000040_01 | -0.364    | -0.207             | -0.146    | -0.02              | -0.056    | 0.025              | -0.076    | 0.208              |
| A000041_01 | 0.234     | 0.244              | 0.119     | 0.359              | 0.111     | 0.33               | 0.137     | 0.028              |
| A000042_01 | -0.657 NA |                    | -0.451    | -0.127 NA          |           | 0.102 NA           |           | 0.42               |
| A000046_01 | -0.206    | 0.368              | 0.079     | 0.313              | -0.186    | 0.046              | -0.354    | 0.245              |
| A000047_01 | -0.119    | 0.214              | -0.553 NA |                    | 0.066     | 0.373 NA           |           | NA                 |
| A000051_01 | -0.45 NA  |                    |           | 0.274              | -0.038    | 0.267 NA           |           | NA                 |
| A000052_01 | -0.17 NA  |                    | -0.236    | 0.289              | -0.297    | 0.125 NA           |           | NA                 |
| A000055_01 | 0.048 NA  |                    | -0.343    | 0.078 NA           |           |                    | 0.255     | 0.583              |
| A000056_01 | 0.122     | -0.026             | -0.215    | -0.012             | 0.072     | 0.277              | 0.143     | 0.37               |
| A000058_01 | -0.174 NA |                    | -0.059    | 0.178 NA           |           | 0.108              | -0.151    | 0.105              |
| A000061_01 | 0.574     | 0.755              | -1.168    | -0.654             | -0.152    | -0.207             | 0.272     | 0.304              |
| A000063_01 | -0.163 NA |                    | -0.293    | -0.134             | 0.448     | 0.688              | 0.403     | 0.479              |
| A000064_01 | -0.754    | -0.316             | 0.123     | 0.217              | -0.182    | -0.118 NA          |           | NA                 |
| A000065_01 | -0.04     | 0.06               | -0.119    | 0.002              | 0.071     | 0.368              | -0.127    | 0.24               |
| A000067_01 | -0.651 NA |                    |           |                    | 0.332     | 0.88 NA            |           | NA                 |
| A000069_01 | -0.364    | -0.138 NA          |           |                    | -0.081    | 0.178 NA           |           | NA                 |
| A000073_01 | -0.247    | 0.142              | -0.032    | 0.25               | -0.559    | -0.532             | -0.319    | 0.052              |
| A000074_01 | -0.136    | 0.131              | -0.136    | 0.005              | 0.37      | 0.774              | 0.206     | 0.363              |
| A000077_01 | -0.061    | 0.033              | -0.104    | 0.117              | -0.496    | -0.282 NA          |           | NA                 |
| A000080_01 | -0.105    | -0.064             | -0.285    | 0.349              | -0.307    | -0.081 NA          |           | 0.164              |
| A000084_01 | -0.229    | 0.108              | -0.422 NA |                    | 0.089     | 0.381 NA           |           | 0.464              |
| A000088_01 | -0.144    | -0.119             | -0.222    | 0.227              | -0.209    | -0.121             | -0.261    | 0.044              |
| A000091_01 | 0.211     | 0.046              | 0.158     | 0.219              | 0.049     | -0.048             | -0.068    | -0.056             |
| A000095_01 | -0.294    | -0.062 NA          |           | 0.198              | 0.153     | 0.419 NA           |           | 0.82               |
| A000098_01 | 0.026     | 0.439              | 0.144     | 0.106              | -0.16     | -0.018             | 0.241     | 0.457              |
| A000107_01 | -0.47     | -0.251             | 0.367     | 0.495              | 0.96      | 1.252              | 0.129     | 0.549              |
| A000111_01 | -0.184    | 0.135              | -0.057    | 0.21               | 0.111     | 0.228              | -0.029    | 0.271              |
| A000113_01 | -0.35     | -0.024             | -0.351    | -0.252             | -0.161    | -0.012             | -0.329    | 0.137              |
| A000115_01 | 0.173     | -0.068             | 0.117     | 0.12               | 0.312     | 0.233              | 0.28      | 0.112              |
| A000120_01 | -0.095    | 0.369              | -0.868 NA |                    | -0.192    | -0.04 NA           |           | NA                 |
| A000123_01 | -0.861 NA |                    | 0.117     | 0.374 NA           |           | -0.465 NA          |           | NA                 |
| A000124_01 | 0.061     | 0.576              | 0.258     | 0.128              | 0.483     | 0.601              | -0.031    | 0.381              |
| A000134_01 | -1.224    | -1.054             | 0.268     | 0.441              | -0.145    | 0.188              | -1.119    | -0.849             |
| A000138_01 | -0.026    | 0.062              | 0.01      | 0.193              | -0.246    | -0.24              | 0.054     | 0.158              |
| A000146_01 | -0.305    | -0.096             | -0.276    | 0.026              | -1.11     | -1.121 NA          |           | NA                 |
| A000150_01 | -0.488    | -0.429             | -0.251    | -0.028             | -0.003    | 0.17               | 0.073     | 0.264              |
| A000157_01 | -1.059 NA |                    | -0.208    | 0.045 NA           |           | -0.857             | -0.27     | 0.072              |
| A000169_01 | -0.263 NA |                    | -0.057    | 0.041              | 0.093     | 0.311              | -0.304    | 0.143              |
| A000173_01 | 0.058     | 0.136              | -0.081    | 0.21               | 0.613     | 0.899              | -0.039    | 0.164              |
| A000179_01 | -0.123 NA |                    | -0.295    | -0.121             | -0.364    | -0.075 NA          |           | 0.352              |

|            |           |          |           |           |          |           |        |        |
|------------|-----------|----------|-----------|-----------|----------|-----------|--------|--------|
| A000185_01 | -0.094    | 0.334    | -0.705    | 0.138     | 0.263    | 0.574 NA  |        | 0.5    |
| A000187_01 | -0.277 NA |          | -0.043 NA |           | 0.739 NA | NA        |        | 1.079  |
| A000198_01 | -0.374 NA |          | -0.351 NA |           | -0.081   | 0.136 NA  |        | 0.384  |
| A000202_01 | 0.439 NA  |          | 0.228     | 0.241     | 0.372    | 0.42      | 0.156  | 0.132  |
| A000220_01 | 0.292     | 0.233    | -0.152    | -0.334    | 0.175    | 0.362     | -0.244 | 0.081  |
| A000223_01 | 0.054     | 0.421    | -0.21     | -0.099    | -0.285   | -0.243    | 0.184  | 0.334  |
| A000226_01 | -0.916    | -0.875   | -0.42     | -0.064    | 0.163    | 0.486 NA  |        | 0.248  |
| A000233_01 | -0.741 NA |          | 0.092 NA  |           | -0.19    | 0.025 NA  | NA     |        |
| A000239_01 | -0.031 NA |          | -0.091    | -0.051 NA |          | 0.206 NA  |        | 0.097  |
| A000248_01 | 0.103     | 0.041    | -0.179    | -0.497    | 0.208    | 0.313 NA  | NA     |        |
| A000253_01 | 0.08      | 0.113    | 0.306     | 0.123     | -0.127   | -0.334    | -0.374 | -0.451 |
| A000259_01 | -0.232    | -0.278   | -0.318    | -0.228    | -0.533   | -0.475    | -0.445 | -0.269 |
| A000260_01 | -0.36     | -0.174   | 0.048     | 0.234     | 0.196    | 0.495     | 0.383  | 0.199  |
| A000261_01 | -0.497    | 0.14     | -0.089    | -0.057    | -0.106   | 0.132     | -0.026 | 0.219  |
| A000263_01 | 0.016     | 0.334    | -0.19     | -0.05     | 0.071    | 0.105 NA  |        | 0.417  |
| A000268_01 | -0.109    | -0.26    | -0.11     | -0.015    | -0.269   | -0.144    | -0.166 | -0.134 |
| A000269_01 | -0.131    | 0.248    | 0.126     | 0.177     | 0.095    | 0.195     | 0.035  | 0.174  |
| A000270_01 | 0.058 NA  |          | -0.388    | 0.103     | 0.131    | 0.448 NA  |        | 0.29   |
| A000297_01 | -0.141 NA |          | 0.07      | 0.25      | 0.312    | 0.656 NA  |        | 0.427  |
| A000301_01 | -0.234    | 0.194    | -0.017    | 0.255     | 0.557    | 0.91      | 0.173  | 0.565  |
| A000302_01 | -0.377 NA |          | -0.445 NA | NA        |          | -0.265 NA | NA     |        |
| A000303_01 | 0.035     | 0.382    | -0.005    | 0.118     | -0.127   | -0.046    | -0.208 | 0.079  |
| A000305_01 | -0.385    | -0.145   | -0.449    | -0.079    | -0.123   | 0.031     | 0.192  | 0.252  |
| A000319_01 | -0.315    | -0.058   | -0.023    | 0.076     | -0.675   | -0.868    | -0.18  | -0.088 |
| A000321_01 | -0.157 NA | NA       | NA        | NA        |          | 0.216 NA  | NA     |        |
| A000322_01 | 0.134     | 0.266    | -0.118    | 0.009     | 0.062    | 0.05      | -0.297 | 0.007  |
| A000324_01 | -0.626 NA |          | 0.071     | 0.449 NA  |          | -0.356 NA | NA     |        |
| A000325_01 | -0.231 NA |          | -0.58     | -0.281    | 0.88     | 1.257     | 0.12   | 0.459  |
| A000326_01 | -0.199    | 0.079    | -0.172    | 0.264     | -0.037   | 0.125     | -0.131 | 0.221  |
| A000329_01 | -0.518    | -0.362   | -0.582    | -0.264    | -0.718   | -0.624 NA |        | -0.291 |
| A000336_01 | 0.234     | 0.106    | -0.418    | -0.145    | -0.103   | -0.188    | 0.14   | 0.281  |
| A000337_01 | 0.047     | 0.448    | -0.379    | 0.016     | -0.399   | -0.24     | -0.145 | 0.444  |
| A000340_01 | -0.374    | 0.323    | -0.213    | -0.084    | 0.135    | 0.29 NA   |        | 0.446  |
| A000348_01 | -1.002    | -0.667   | -1.043    | -0.376    | -1.122   | -0.73 NA  |        | -0.278 |
| A000351_01 | -0.162    | -0.014   | -0.259    | -0.229    | 0.026    | 0.122     | -0.135 | -0.008 |
| A000352_01 | -0.231    | -0.066   | 0.011 NA  |           | -1.177   | -1.119 NA | NA     |        |
| A000353_01 | 0.354     | 0.305    | -0.1      | 0.066     | -0.136   | -0.174    | 0.006  | 0.029  |
| A000355_01 | -0.054    | 0.174    | -0.586 NA | NA        |          | -0.042 NA | NA     |        |
| A000358_01 | 0.061     | 0.046    | -0.298    | -0.009    | -0.716   | -0.618    | -0.592 | -0.057 |
| A000364_01 | -0.124 NA |          | -0.088    | 0.176 NA  |          | 0.161     | 0.075  | 0.243  |
| A000365_01 | -0.002 NA | NA       | NA        | NA        | NA       | NA        |        | 0.547  |
| A000368_01 | 0.175     | 0.122    | 0.116     | 0.282     | 0.014    | -0.009 NA | NA     |        |
| A000371_01 | -0.176    | -0.091   | -0.035    | 0.122     | -0.221   | -0.225    | 0.096  | 0.045  |
| A000373_01 | -0.262    | -0.097   | -0.173    | 0.249     | -0.24    | -0.029 NA |        | 0.248  |
| A000377_01 | 0.021 NA  |          | -0.37 NA  |           | 0.244    | 0.498 NA  |        | -0.158 |
| A000382_01 | -0.267 NA |          | -1.659    | -0.956 NA |          | -1.38     | -0.676 | -0.291 |
| A000384_01 | -0.251 NA |          | -0.382    | -0.003 NA |          | 0.104 NA  | NA     |        |
| A000389_01 | -0.713    | -0.525   | 0.471     | 0.798     | 1.315    | 1.993     | 0.664  | 0.934  |
| A000396_01 | -0.023    | 0.398    | -0.399    | -0.08     | -0.096   | 0.168     | -0.352 | 0.091  |
| A000402_01 | -0.558 NA |          | -0.331 NA |           | -0.071   | 0.626 NA  | NA     |        |
| A000406_01 | -0.71     | -0.526   | -0.079    | 0.078     | -0.466   | -0.194    | -0.334 | -0.038 |
| A000410_01 | 0.179     | 0.324    | -0.146    | -0.191    | 0.511    | 0.82      | 0.068  | 0.275  |
| A000412_01 | -0.08     | 0.177    | -0.25     | 0.227     | 0.082    | 0.299 NA  |        | 0.204  |
| A000419_01 | -0.14     | 0.004    | -0.229    | 0.031     | 0.181    | 0.332 NA  | NA     |        |
| A000420_01 | 0.092     | 0.182 NA | NA        |           | 0.252    | 0.482 NA  | NA     |        |
| A000423_01 | -0.106    | 0.542    | -0.352 NA |           | 0.277    | 0.808 NA  |        | 0.576  |
| A000426_01 | -0.219    | 0.15     | -0.157    | 0.044     | -0.065   | 0.003     | -0.232 | 0.262  |
| A000454_01 | -0.187    | -0.034   | 0.041     | 0.135     | 0.359    | 0.587     | 0.212  | 0.275  |
| A000455_01 | -0.524 NA | NA       |           | 0.268 NA  | NA       | NA        |        | 0.307  |
| A000462_01 | -0.361 NA |          | -0.109    | 0.336 NA  |          | 0.057     | 0.09   | 0.243  |
| A000471_01 | -0.385 NA |          | -0.374 NA |           | -0.385   | -0.031 NA |        | 0.223  |
| A000473_01 | -0.037    | -0.073   | -0.488    | -0.26     | -0.635   | -0.643    | -0.322 | -0.218 |
| A000478_01 | -0.091 NA |          | 0.039     | 0.149     | -0.234   | -0.084    | -0.138 | 0.229  |
| A000479_01 | -0.108    | 0.187    | -0.229    | -0.194    | 0.291    | 0.389 NA  |        | 0.241  |
| A000489_01 | 0.073     | 0.008    | -0.659    | -0.348    | 0.109    | 0.185     | 0.198  | 0.181  |
| A000500_01 | -0.517 NA |          | -0.323    | -0.007    | 0.342    | 0.711 NA  |        | 0.491  |
| A000511_01 | -0.147    | 0.121    | 0.012     | 0.416     | -0.409   | -0.155    | -0.408 | -0.083 |
| A000517_01 | 0.044     | 0.234    | -0.249    | 0.233     | -0.062   | 0.04 NA   |        | -0.029 |

|            |    |           |        |           |          |        |           |        |        |
|------------|----|-----------|--------|-----------|----------|--------|-----------|--------|--------|
| A000519_01 |    | -0.11     | 0.035  | 0.053     | -0.205   | -0.115 | -0.176    | 0.039  | 0.015  |
| A000523_01 |    | -0.155    | 0.046  | -0.065    | -0.057   | 0.19   | 0.276     | -0.222 | 0.099  |
| A000525_01 |    | -0.116    | 0.246  | -0.249    | 0.036    | 0.114  | 0.237 NA  | NA     |        |
| A000526_01 |    | -0.287    | 0.17   | -0.425    | -0.272   | 0.18   | 0.501     | 0.052  | 0.538  |
| A000533_01 |    | -0.247    | -0.12  | -0.155    | -0.229   | -0.001 | -0.079    | -0.203 | -0.01  |
| A000534_01 |    | -0.268    | 0.03   | -0.114    | -0.06    | 0.337  | 0.533     | -0.017 | 0.247  |
| A000543_01 |    | 0.038     | 0.104  | -0.397    | -0.382   | 0.183  | 0.116     | 0.329  | 0.438  |
| A000548_01 |    | -0.148    | 0.147  | -0.351    | -0.328   | 0.285  | 0.349     | -0.534 | -0.303 |
| A000553_01 |    | -0.651    | -0.252 | -0.124    | 0.248    | -0.636 | -0.544    | -0.395 | -0.149 |
| A000555_01 |    | 0.327     | 0.734  | 0.556     | 0.641    | -0.031 | 0.41      | 0.032  | 0.245  |
| A000559_01 |    | -0.138 NA |        | -0.336    | 0.073    | -0.15  | 0.059 NA  |        | 0.32   |
| A000567_01 |    | 0.197     | 0.216  | -0.224    | -0.107   | 0.18   | 0.13      | 0.082  | -0.04  |
| A000568_01 |    | -0.981    | -0.742 | 0.146     | 0.081    | -0.911 | -0.754    | -0.358 | -0.068 |
| A000577_01 |    | 0.247     | 0.19   | 0.214     | 0.171    | 0.701  | 0.904     | 0.261  | 0.352  |
| A000579_01 |    | -0.664    | -0.491 | 0.675     | 0.989    | 1.233  | 1.767     | 0.58   | 0.754  |
| A000582_01 |    | -0.054    | 0.063  | -0.173    | -0.131   | 0.675  | 0.907     | 0.276  | 0.412  |
| A000589_01 |    | -0.072 NA |        | -0.239    | 0.027    | -0.151 | -0.147 NA |        | 0.174  |
| A000590_01 |    | -0.414 NA |        | -0.01     | 0.219    | -0.342 | 0.068 NA  |        | 0.382  |
| A000592_01 |    | -0.297    | -0.131 | -0.486    | -0.03    | 0.478  | 0.832 NA  |        | -0.037 |
| A000600_01 |    | 0.118     | 0.259  | 0.376     | 0.514    | 0.214  | 0.456     | -0.697 | -0.397 |
| A000608_01 |    | 0.137     | 0.075  | -0.124    | 0.027    | 0.042  | 0.273     | 0.021  | 0.219  |
| A000610_01 | NA |           | NA     | 0.076     | 0.261 NA |        | -0.286    | 0.095  | 0.108  |
| A000612_01 |    | 0.518     | 0.503  | -0.165    | 0.01     | 0.31   | 0.375     | -0.064 | 0.021  |
| A000613_01 |    | -0.04 NA  |        | -0.529 NA |          | 0.143  | 0.501 NA  |        | 0.176  |
| A000618_01 |    | -0.229 NA |        | 0.004     | 0.204 NA |        | 0.378     | -0.056 | -0.017 |
| A000619_01 |    | -0.585    | -0.468 | -0.904    | -0.745   | 0.986  | 1.613     | 0.473  | 0.863  |
| A000622_01 | NA |           | 0.002  | -0.108    | -0.096   | -0.036 | 0.082     | 0.195  | 0.26   |
| A000629_01 |    | 0.021     | -0.099 | -0.063    | 0.032    | -0.046 | -0.048    | -0.042 | 0.059  |
| A000633_01 |    | 0.048     | -0.022 | -0.331    | -0.319   | -0.126 | -0.168    | 0.143  | 0.127  |
| A000637_01 |    | -0.023 NA |        | -0.142 NA |          | 0.078  | 0.146 NA  |        | 0.222  |
| A000638_01 |    | -0.519 NA |        | -0.075    | 0.123    | -0.632 | -0.162    | -0.151 | -0.042 |
| A000639_01 |    | 0.514     | 0.398  | -0.004    | 0.35     | 0.165  | 0.285     | -0.014 | -0.046 |
| A000643_01 |    | -0.038    | -0.044 | -0.188    | 0.001    | 0.076  | 0.016     | 0.023  | 0.089  |
| A000645_01 |    | -0.227    | -0.017 | -0.084    | -0.207   | -0.391 | -0.443    | -0.326 | -0.17  |
| A000649_01 |    | -0.063    | 0.179  | 0.067     | 0.134    | 0.152  | 0.366     | -0.035 | -0.016 |
| A000650_01 |    | -0.05     | 0.061  | -0.048    | -0.129   | 0.209  | 0.46      | 0.033  | 0.18   |
| A000652_01 |    | 0.46      | 0.404  | 0.697     | 0.73     | 0.531  | 0.492     | 0.556  | 0.444  |
| A000653_01 |    | 0.263     | 0.589  | -0.247    | -0.22    | 0.286  | 0.499     | 0.247  | 0.438  |
| A000657_01 |    | -0.182    | -0.158 | -0.167    | -0.005   | -0.303 | -0.004    | -0.044 | 0.17   |
| A000665_01 |    | -0.058    | 0.305  | 0.049     | 0.009    | 0.032  | 0.365     | 0.192  | 0.349  |
| A000668_01 |    | -0.023    | 0.292  | -0.277    | 0.039    | 0.179  | 0.475 NA  |        | 0.128  |
| A000677_01 |    | -0.167 NA |        | -0.148 NA | NA       |        | -0.387 NA | NA     |        |
| A000684_01 |    | 0.183 NA  |        | -0.411 NA |          | 0.185  | 0.646 NA  | NA     |        |
| A000685_01 |    | -0.087 NA |        | -0.019    | 0.091    | -0.05  | 0.337     | -0.106 | 0.137  |
| A000687_01 |    | -0.124 NA |        | -0.217 NA | NA       |        | 0.072 NA  | NA     |        |
| A000692_01 |    | 0.342     | 0.328  | 0.207     | 0.41     | 0.097  | 0.012     | -0.144 | -0.044 |
| A000696_01 |    | -0.309    | -0.033 | 0.016     | 0.098    | 0.415  | 0.72      | -0.006 | 0.262  |
| A000697_01 |    | -0.456 NA | NA     |           | 0.25     | -0.403 | -0.454 NA |        | 0.114  |
| A000700_01 |    | 0.203     | 0.233  | -0.185    | 0.314    | -0.015 | 0.32      | 0.008  | 0.111  |
| A000701_01 |    | 0.367     | 0.229  | -0.173    | 0.319    | -0.105 | -0.055    | 0.073  | -0.005 |
| A000710_01 |    | -0.044    | 0.203  | -0.401    | -0.295   | -0.016 | 0.394     | -0.21  | 0.252  |
| A000711_01 |    | -0.17 NA  |        | -0.452    | -0.289   | -0.202 | 0.091     | 0.259  | 0.444  |
| A000722_01 |    | 0.25      | 0.454  | -0.066    | 0.05     | 0.29   | 0.352     | 0.053  | 0.383  |
| A000727_01 |    | -0.354    | -0.192 | -0.06     | 0.031    | 0.048  | 0.263     | 0.026  | 0.25   |
| A000731_01 | NA |           | NA     | -0.171    | 0.155    | 0.195  | 0.551     | 0.106  | 0.163  |
| A000742_01 |    | -0.569    | -0.189 | -0.069    | 0.008    | -0.542 | -0.584    | -0.112 | -0.024 |
| A000755_01 |    | 0.237     | 0.263  | -0.17     | -0.061   | 0.08   | 0.126     | -0.052 | 0.049  |
| A000757_01 |    | -0.243 NA |        | -0.1 NA   |          | 0.11   | 0.301 NA  |        | 0.329  |
| A000759_01 |    | 0.104     | 0.514  | 0.073     | 0.402 NA |        | -0.09     | -0.196 | 0.025  |
| A000764_01 |    | -0.375    | -0.052 | 0.64      | 0.472    | -0.021 | 0.233     | -0.425 | 0.059  |
| A000770_01 |    | 0.207     | 0.428  | 0.093     | 0.024    | -0.155 | -0.153    | -0.062 | 0.119  |
| A000775_01 |    | -0.228    | -0.134 | -0.335 NA |          | 0.028  | -0.011 NA |        | 0.227  |
| A000781_01 |    | -0.039    | -0.045 | -0.268    | 0.032    | 0.332  | 0.579     | -0.039 | 0.256  |
| A000782_01 |    | 0.119     | 0.238  | -0.721 NA |          | -0.39  | -0.287 NA | NA     |        |
| A000794_01 |    | 0.052     | 0.194  | -0.113    | 0.572    | -0.423 | -0.191 NA | NA     |        |
| A000795_01 |    | 0.378     | 0.594  | 0.748     | 0.451    | 0.484  | 0.483     | -0.373 | -0.084 |
| A000801_01 |    | 0.024     | 0.019  | -0.109    | -0.054   | -0.21  | -0.283    | -0.097 | -0.133 |
| A000802_01 |    | -0.373 NA |        | -0.188    | -0.099   | -0.108 | 0.129 NA  |        | 0.51   |

|            |           |           |           |          |        |           |        |        |
|------------|-----------|-----------|-----------|----------|--------|-----------|--------|--------|
| A000803_01 | 0.11      | 0.267     | -0.313    | -0.106   | 0.221  | 0.4       | -0.153 | 0.05   |
| A000807_01 | -0.239    | -0.129    | -0.134    | 0.002 NA |        | 0.012 NA  | NA     |        |
| A000808_01 | 0.311     | 0.504     | -0.315    | 0.135    | 0.043  | 0.047 NA  |        | 0.511  |
| A000814_01 | 0.384     | 0.691     | 0.084     | 0.084    | 0.269  | 0.274     | -0.151 | 0.098  |
| A000827_01 | -0.201    | -0.295    | -0.896    | -0.644   | -0.348 | -0.146    | -0.021 | -0.08  |
| A000828_01 | 0.429     | 0.409     | -0.231    | 0.036    | 0.21   | 0.251     | 0.259  | 0.318  |
| A000835_01 | -0.017    | 0.116     | -0.16 NA  |          | -0.256 | -0.02     | -0.02  | 0.351  |
| A000842_01 | -0.054    | 0.417     | 0.113     | 0.398 NA |        | 0.021     | 0      | 0.298  |
| A000851_01 | -0.876 NA |           | -0.273    | 0.028    | -1.043 | -0.92 NA  |        | 0.333  |
| A000853_01 | 0.402     | 0.249     | -0.461 NA |          | -0.125 | -0.012    | 0.148  | 0.147  |
| A000856_01 | -0.058    | -0.077 NA |           | -0.265   | -0.457 | -0.275    | 0.239  | 0.188  |
| A000875_01 | -0.005 NA |           | -0.251    | 0.07     | 0.093  | 0.134 NA  |        | 0.08   |
| A000880_01 | -0.276    | 0.031     | -0.408 NA |          | 0.494  | 0.876 NA  | NA     |        |
| A000888_01 | 0.124     | 0.246     | -0.216    | -0.145   | 0.065  | 0.35      | 0.195  | 0.501  |
| A000897_01 | -0.265 NA |           | -0.004    | 0.289 NA | NA     | NA        |        | 0.392  |
| A000903_01 | 0.152 NA  |           | -0.084    | 0.115    | 0.524  | 0.693 NA  | NA     |        |
| A000910_01 | 0.048 NA  |           | -0.099    | 0.252    | 0.289  | 0.518 NA  |        | 0.628  |
| A000919_01 | 0.004 NA  |           | -0.08     | -0.05    | 0.045  | 0.105     | -0.045 | 0.321  |
| A000922_01 | -0.313 NA |           | -0.137    | 0.021    | -0.366 | -0.165 NA |        | 0.401  |
| A000936_01 | -0.121    | 0.057     | -0.216    | -0.206   | 0.183  | 0.313     | 0.272  | 0.398  |
| A000937_01 | 0.401     | 0.297     | 0.203     | 0.036    | 0.284  | 0.262     | -0.088 | 0.076  |
| A000941_01 | -0.041 NA |           | -0.26     | 0.007 NA |        | 0.28      | 0.19   | 0.114  |
| A000945_01 | -0.336 NA |           | 0.179     | 0.471 NA | NA     | NA        |        | 0.124  |
| A000953_01 | -0.301    | -0.154    | -0.018    | -0.098   | -0.168 | 0.015     | -0.088 | 0.128  |
| A000960_01 | 0.094 NA  |           | -0.113    | 0.156    | -0.272 | -0.343 NA | NA     |        |
| A000962_01 | 0.059     | 0.082     | 0.29      | 0.266    | -0.09  | -0.152    | -0.115 | -0.104 |
| A000970_01 | -0.24     | -0.153    | -0.229    | -0.044   | -0.169 | 0.023     | -0.232 | -0.195 |
| A000974_01 | -0.43 NA  |           | 0.089     | 0.357    | 0.083  | 0.452     | -0.101 | 0.173  |
| A000984_01 | -0.061    | 0.003     | -0.017    | -0.107   | 0.111  | 0.177     | -0.057 | 0.288  |
| A000987_01 | 0.005     | -0.122    | -0.228 NA |          | -0.053 | -0.086 NA | NA     |        |
| A000988_01 | 0.105     | 0.256     | 0.272     | 0.314    | 0.486  | 0.553     | -0.128 | 0.063  |
| A000992_01 | -0.277    | -0.113    | -0.557    | -0.108   | -0.689 | -0.792 NA |        | -0.143 |
| A000997_01 | 0.149     | 0.147     | 0.089     | 0.272    | 0.093  | 0.106     | -0.009 | -0.012 |
| A001006_01 | -0.437 NA |           | -0.428    | 0.218    | -0.497 | -0.337 NA | NA     |        |
| A001007_01 | -0.008    | 0.298     | 0.006     | 0.26     | 0.13   | 0.339 NA  | NA     |        |
| A001011_01 | -0.236    | 0.152     | -0.422 NA |          | 0.334  | 0.702 NA  |        | 0.474  |
| A001012_01 | -0.514    | -0.457    | -0.389    | -0.01    | -0.236 | -0.241    | -0.415 | -0.519 |
| A001017_01 | -0.402    | 0.109     | -0.204    | -0.05    | -0.684 | -0.575    | 0.037  | 0.031  |
| A001019_01 | 0.029     | -0.163    | -0.394    | -0.396   | -0.16  | -0.007    | 0.149  | 0.24   |
| A001023_01 | -0.174 NA | NA        | NA        |          | 0.362  | 0.898 NA  |        | 0.545  |
| A001029_01 | -0.072 NA |           | 0.073     | 0.337 NA |        | 0.178     | 0.093  | 0.332  |
| A001031_01 | -0.154    | 0.108     | -0.222    | 0.085    | 0.016  | 0.257 NA  |        | 0.401  |
| A001032_01 | -0.273    | -0.214    | -0.055    | 0        | 0.12   | 0.136     | 0.074  | 0.108  |
| A001034_01 | -0.018    | 0.078     | 0.124     | 0.2      | -0.195 | -0.313    | -0.023 | -0.029 |
| A001035_01 | -0.084    | 0.093     | -0.023    | -0.08    | 0.144  | 0.299     | 0.056  | 0.184  |
| A001036_01 | 0.284     | 0.23      | -0.982    | -0.437   | 0.129  | 0.039     | 0.413  | 0.472  |
| A001041_01 | -0.006    | 0.29      | -0.146    | -0.059   | -0.033 | 0.005     | -0.055 | 0.037  |
| A001042_01 | -0.352 NA |           | -0.052 NA | NA       |        | 0.441 NA  |        | 0.419  |
| A001043_01 | -0.081    | 0.179     | 0.07      | 0.12     | -0.342 | -0.401    | -0.011 | 0.277  |
| A001044_01 | 0.612     | 0.689     | -0.431 NA |          | -0.858 | -0.908 NA | NA     |        |
| A001045_01 | NA        | 0.216     | -0.307    | -0.155   | -0.105 | 0.091     | 0.148  | 0.247  |
| A001048_01 | 0.039     | 0.226     | -0.221    | -0.131   | 0.028  | -0.032    | -0.002 | 0.096  |
| A001052_01 | 0.029     | -0.076    | -0.094    | 0.08     | -0.723 | -0.779    | -0.352 | -0.339 |
| A001053_01 | -0.04 NA  |           | -0.227    | 0.104    | -0.222 | -0.019 NA |        | 0.074  |
| A001056_01 | -0.312    | -0.059    | -0.546    | -0.656   | -0.163 | -0.071    | -0.041 | 0.381  |
| A001059_01 | -0.049 NA |           | 0.402     | 0.513    | -0.143 | 0.045     | -0.976 | -0.427 |
| A001071_01 | 0.073 NA  |           | -0.322    | 0.176 NA |        | 0.205 NA  |        | 0.439  |
| A001077_01 | -0.18 NA  |           | 0.084     | 0.198 NA |        | -0.796 NA |        | 0.298  |
| A001082_01 | 0.133     | 0.41      | -0.141    | 0.139    | 0.082  | 0.108     | -0.012 | 0.188  |
| A001086_01 | 0.123     | 0.022     | -0.093    | 0.04     | 0.589  | 0.626     | 0.163  | 0.11   |
| A001087_01 | 0.39      | 0.683     | 0.101     | 0.116    | 0.253  | 0.386     | 0.051  | 0.284  |
| A001088_01 | -0.257 NA |           | -0.05     | 0.136    | -0.282 | -0.018    | -0.232 | -0.029 |
| A001089_01 | 0.352 NA  |           | -0.063    | 0.226 NA |        | 0.401 NA  |        | 0.326  |
| A001090_01 | -0.062    | 0.124     | 0.106     | 0.227    | 0.01   | -0.072    | -0.033 | 0.077  |
| A001091_01 | 0.005     | 0.06      | 0.164     | 0.062    | 0.283  | 0.187     | 0.169  | 0.12   |
| A001092_01 | 0.137     | 0.559     | 0.22      | 0.226    | 0.097  | 0.071     | -0.094 | 0.016  |
| A001093_01 | 0.603     | 0.462     | -0.369    | -0.112   | 0.152  | 0.199     | -0.675 | -0.364 |
| A001095_01 | 0.501     | 0.44      | -0.313    | -0.1     | 0.078  | -0.088    | -0.268 | -0.341 |



|            |        |        |        |        |        |        |        |    |        |
|------------|--------|--------|--------|--------|--------|--------|--------|----|--------|
| A001098_01 | -0.575 | -0.537 | -0.504 | -0.211 | -0.491 | -0.619 | -0.694 | NA |        |
| A001099_01 | -1.387 | -1.135 | 0.868  | 1.201  | 1.178  | 1.881  | NA     |    | 0.413  |
| A001100_01 | 0.081  | 0.328  | 0.043  | 0.105  | 0.007  | 0.161  | -0.148 |    | 0.411  |
| A001102_01 | -0.516 | -0.211 | 0.072  | -0.06  | -0.273 | -0.152 | -0.349 |    | 0.005  |
| A001103_01 | -0.326 | -0.231 | 0.013  | 0.122  | 0.497  | 0.792  | NA     |    | -1.078 |
| A001105_01 | 0.01   | NA     | 0.414  | 0.495  | -0.109 | -0.104 | -0.373 |    | -0.148 |
| A001106_01 | 0.1    | NA     | -0.144 | -0.02  | NA     | -0.153 | 0.155  |    | -0.057 |
| A001107_01 | 0.422  | 0.513  | -0.003 | 0.306  | 0.282  | 0.281  | -0.309 |    | 0.026  |
| A001113_01 | -0.296 | -0.26  | -0.335 | 0.045  | -0.135 | 0.152  | 0.041  |    | 0.123  |
| A001115_01 | -1.332 | -1.272 | 0.785  | 0.543  | 1.098  | 1.597  | 0.41   |    | 0.471  |
| A001121_01 | 0.134  | 0.153  | -0.14  | -0.014 | -0.042 | -0.012 | -0.06  |    | 0.012  |
| A001122_01 | -0.231 | -0.011 | -0.124 | 0.185  | -0.167 | -0.005 | NA     |    | NA     |
| A001126_01 | 0.168  | NA     | -0.252 | 0.274  | -0.31  | -0.171 | NA     |    | 0.162  |
| A001127_01 | -0.035 | 0.014  | -0.145 | -0.035 | -0.217 | -0.302 | -0.02  |    | 0.124  |
| A001128_01 | -0.254 | -0.069 | 0.002  | -0.082 | 0.079  | 0.029  | 0.126  |    | 0.429  |
| A001129_01 | -0.347 | -0.576 | -0.956 | -0.655 | 0.165  | 0.449  | -0.534 |    | -0.464 |
| A001131_01 | -0.222 | -0.052 | -0.534 | -0.286 | 0.084  | 0.409  | -0.1   |    | 0.267  |
| A001134_01 | -0.008 | 0.198  | -0.536 | -0.361 | -0.034 | -0.017 | NA     |    | NA     |
| A001135_01 | -0.314 | -0.113 | -0.343 | 0.085  | -2.243 | -2.055 | -0.714 |    | -0.476 |
| A001136_01 | 0.106  | 0.435  | -0.209 | 0.069  | -0.404 | -0.192 | -0.111 |    | 0.219  |
| A001137_01 | -0.09  | NA     | -0.501 | NA     | NA     | NA     | NA     |    | NA     |
| A001138_01 | -0.279 | -0.258 | -0.086 | 0.08   | -0.386 | -0.259 | -0.052 |    | -0.014 |
| A001140_01 | -0.296 | 0.044  | -0.155 | 0.058  | -0.165 | 0.067  | -0.008 |    | 0.233  |
| A001141_01 | -0.223 | 0.315  | 0.318  | 0.424  | -1.048 | -1.019 | -0.374 |    | 0.035  |
| A001142_01 | 0.273  | 0.339  | -0.16  | -0.004 | 0.363  | 0.347  | 0.194  |    | 0.099  |
| A001144_01 | -3.816 | -2.146 | -3.25  | -2.726 | -4.611 | -5.245 | -2.791 |    | -3.027 |
| A001146_01 | 0.076  | 0.189  | 0.018  | 0.19   | -0.773 | -0.952 | -0.156 |    | -0.078 |
| A001147_01 | 0.235  | 0.199  | -0.159 | 0.048  | 0.124  | 0.214  | 0.361  |    | 0.319  |
| A001153_01 | -0.034 | 0.255  | 0.138  | 0.225  | 0.16   | 0.243  | -0.132 |    | 0.022  |
| A001154_01 | 0.025  | 0.109  | -0.415 | -0.112 | -0.038 | 0.09   | 0.121  |    | 0.124  |
| A001155_01 | -0.418 | -0.312 | -1.064 | -0.944 | -0.248 | -0.282 | -0.974 |    | -0.894 |
| A001159_01 | -0.614 | -0.197 | -0.201 | 0.072  | 0.431  | 0.637  | NA     |    | 0.316  |
| A001163_01 | 0.196  | 0.563  | -0.385 | -0.294 | 0.002  | -0.012 | 0.043  |    | 0.337  |
| A001165_01 | -0.386 | -0.116 | -0.663 | -0.278 | -0.8   | -0.756 | -0.796 |    | -0.145 |
| A001166_01 | -0.38  | -0.244 | -0.001 | 0.194  | -0.546 | -0.463 | NA     |    | 0.311  |
| A001169_01 | -0.19  | -0.01  | 0.042  | 0.357  | -0.384 | -0.372 | -0.015 |    | NA     |
| A001180_01 | 0.214  | 0.45   | 0.068  | -0.087 | 0.438  | 0.435  | 0.082  |    | 0.307  |
| A001181_01 | -0.13  | -0.227 | -0.338 | -0.024 | -0.035 | 0.127  | NA     |    | NA     |
| A001184_01 | -0.095 | -0.001 | -0.016 | 0.142  | 0.062  | 0.135  | 0.137  |    | 0.179  |
| A001186_01 | -0.253 | -0.137 | 0.079  | 0.218  | -0.052 | 0.134  | -0.129 |    | 0.157  |
| A001187_01 | NA     | 0.458  | 0.178  | 0.277  | NA     | -0.194 | -0.203 |    | 0.238  |
| A001188_01 | 0.012  | -0.037 | -0.105 | 0.039  | 0.679  | 0.867  | 0.085  |    | -0.022 |
| A001189_01 | 0.101  | 0.304  | 0.26   | 0.281  | -0.025 | -0.006 | -0.416 |    | -0.218 |
| A001190_01 | -0.024 | -0.005 | -0.217 | 0.019  | -0.351 | -0.131 | -0.034 |    | 0.35   |
| A001197_01 | 0.258  | 0.564  | 0.013  | 0.29   | NA     | 0.058  | -0.225 |    | 0.099  |
| A001199_01 | 0.007  | 0.131  | 0.135  | 0.203  | 0.379  | 0.443  | -0.151 |    | -0.022 |
| A001207_01 | -0.211 | -0.008 | 0.084  | 0.353  | 0.221  | 0.326  | 0.116  |    | 0.251  |
| A001209_01 | 0.264  | 0.527  | 0.257  | 0.359  | 0.044  | -0.021 | -0.382 |    | -0.337 |
| A001210_01 | 0.095  | 0.28   | -0.084 | 0.082  | -0.293 | -0.167 | NA     |    | NA     |
| A001211_01 | -0.011 | 0.077  | -0.148 | -0.033 | -0.303 | -0.147 | 0.1    |    | 0.36   |
| A001212_01 | 0.263  | 0.473  | -0.181 | 0.151  | -0.232 | -0.26  | -0.047 |    | 0.093  |
| A001215_01 | 0.219  | 0.391  | 0.522  | 0.542  | -0.249 | -0.391 | -0.636 |    | -0.606 |
| A001216_01 | -0.508 | -0.317 | -0.274 | -0.259 | -0.165 | 0.226  | -0.014 |    | 0.142  |
| A001217_01 | -0.419 | 0.005  | -0.071 | -0.12  | 0.505  | 0.684  | -0.266 |    | 0.046  |
| A001218_01 | 0.013  | NA     | -0.129 | -0.073 | 0.339  | 0.496  | 0.06   |    | 0.279  |
| A001219_01 | NA     | NA     | -0.196 | 0.262  | 0.318  | 0.444  | NA     |    | 0.457  |
| A001222_01 | -0.258 | -0.102 | 0.034  | 0.029  | 0.549  | 0.718  | NA     |    | 0.21   |
| A001223_01 | -0.199 | 0.263  | -0.19  | 0.002  | -0.445 | -0.43  | -0.136 |    | 0.166  |
| A001227_01 | 0.26   | 0.542  | 0.183  | 0.453  | 0.126  | 0.326  | -0.229 |    | -0.031 |
| A001229_01 | -0.513 | -0.495 | -0.322 | -0.21  | NA     | -0.778 | 0.064  |    | -0.025 |
| A001230_01 | -0.041 | NA     | -0.569 | -0.06  | -0.099 | -0.085 | NA     |    | 0.498  |
| A001231_01 | -0.622 | -0.227 | -0.134 | 0.175  | -0.792 | -0.616 | -0.163 |    | 0.124  |
| A001232_01 | NA     | NA     | -0.282 | 0.345  | NA     | 0.369  | NA     |    | 0.087  |
| A001234_01 | -0.104 | 0.043  | -0.201 | 0.006  | 0.359  | 0.521  | 0.276  |    | 0.462  |
| A001235_01 | 0.217  | 0.237  | 0.31   | 0.466  | -0.495 | -0.626 | -0.254 |    | -0.081 |
| A001237_01 | 0.131  | 0.13   | -0.329 | -0.04  | 0.317  | 0.482  | -0.093 |    | 0.059  |
| A001240_01 | 0.241  | 0.585  | -0.525 | -0.248 | 0.014  | 0.064  | 0.006  |    | 0.438  |
| A001241_01 | -0.141 | NA     | 0.182  | 0.35   | -0.897 | -0.85  | NA     |    | NA     |

|            |    |           |          |           |           |        |           |          |        |
|------------|----|-----------|----------|-----------|-----------|--------|-----------|----------|--------|
| A001242_01 |    | -4.723    | -2.683   | -2.409    | -2.083    | -4.703 | -5.137    | -3.961   | -3.81  |
| A001244_01 |    | 0.401     | 0.405    | -0.053    | 0.1       | 0.193  | 0.193     | -0.122   | 0.046  |
| A001245_01 |    | -0.085 NA |          | 0.325     | 0.367     | 0.304  | 0.431     | 0.038    | 0.257  |
| A001246_01 |    | 0.161     | 0.038    | -0.324    | -0.194    | -0.153 | -0.159    | -0.234   | 0.027  |
| A001247_01 |    | 0.109     | 0.352    | -0.17     | -0.114    | -0.515 | -0.609 NA |          | -0.224 |
| A001248_01 |    | -0.117    | -0.256   | 0.677     | 0.414     | 1.103  | 1.253     | 0.31     | 0.163  |
| A001250_01 |    | -0.052    | 0.16     | -0.457    | -0.375    | -0.275 | -0.187    | -0.041   | 0.463  |
| A001251_01 |    | -0.276    | -0.14    | -0.115    | -0.153    | 0.046  | 0.251     | 0.027    | 0.175  |
| A001254_01 |    | 0.07      | 0.247    | -0.436    | -0.022    | -0.353 | -0.255    | -0.118   | 0.089  |
| A001255_01 |    | -0.297 NA |          | -0.403 NA |           | -0.166 | -0.025 NA |          | 0.505  |
| A001257_01 |    | -0.205 NA | NA       |           | 0.038     | 0.084  | 0.26 NA   | NA       |        |
| A001260_01 |    | -0.293 NA |          | -0.031    | 0.053 NA  | NA     |           | -0.158   | 0.141  |
| A001261_01 |    | -0.169    | -0.17 NA |           | -0.66     | 0.304  | 0.511     | -0.549   | -0.663 |
| A001263_01 |    | -0.8      | -0.506   | -0.478    | -0.335    | 0.101  | 0.36 NA   | NA       |        |
| A001273_01 |    | -0.136    | -0.063   | -0.183    | 0.014     | 0.022  | 0.211     | -0.072   | 0.076  |
| A001281_01 |    | 0.155     | 0.144    | -0.239    | -0.381    | -0.178 | -0.148    | 0.374    | 0.436  |
| A001283_01 |    | 0.057     | 0.042    | -0.053    | 0.039     | 0.196  | 0.27      | -0.085   | -0.079 |
| A001284_01 |    | 0.134     | 0.321    | 0.173     | -0.022    | 0.54   | 0.668     | 0.011    | 0.231  |
| A001285_01 |    | -0.005    | 0.087    | 0.057     | 0.038     | 0.289  | 0.369     | -0.149   | -0.066 |
| A001289_01 |    | -0.805    | -0.452   | -0.093    | 0.09      | -0.439 | -0.204    | -0.181   | 0.186  |
| A001291_01 | NA | NA        |          | -0.096    | 0.052 NA  | NA     |           | -0.231   | 0.023  |
| A001293_01 |    | -0.28     | -0.37    | 0.138     | 0.238     | -0.236 | -0.144    | -0.052   | -0.109 |
| A001296_01 |    | 0.327     | 0.404    | -0.122    | -0.169    | -0.182 | 0.108     | 0.041    | 0.352  |
| A001297_01 |    | 0.038     | -0.04    | 0.11      | 0.025     | -0.361 | 0.142     | 0.097    | 0.183  |
| A001298_01 | NA | NA        |          | 0.243     | 0.216     | -0.318 | 0.141     | -0.181   | -0.169 |
| A001299_01 |    | -0.245    | -0.086   | -0.309    | -0.65     | 0.325  | 0.218     | -0.332   | -0.347 |
| A001302_01 |    | -1.06     | -0.863   | 0.064     | 0.231     | -0.281 | -0.135    | -0.563   | -0.424 |
| A001303_01 |    | 0.075     | 0.076    | -0.412    | -0.246    | -0.755 | -0.015    | -0.175   | -0.157 |
| A001306_01 | NA |           | 0.076    | -0.204    | -0.131    | 0.091  | 0.122     | 0.106 NA |        |
| A001308_01 |    | 0.208     | 0.313    | -0.498    | -0.335    | 0.338  | 0.479     | 0.243    | 0.485  |
| A001309_01 |    | -0.306    | -0.139   | -0.159    | 0.114     | -0.002 | 0.163     | -0.266   | -0.184 |
| A001311_01 |    | -0.03     | -0.109   | 0.269     | 0.116     | 0.051  | -0.136    | 0.139    | 0.125  |
| A001317_01 |    | 0.019     | -0.059   | -0.214    | -0.135    | -0.041 | -0.086 NA | NA       |        |
| A001318_01 |    | -0.133    | 0.16     | 0.613     | 0.582     | 0.546  | 0.572     | -0.311   | -0.214 |
| A001324_01 | NA |           | 0.428    | 0.165     | 0.044     | 0.071  | -0.017    | -0.035   | 0.218  |
| A001325_01 |    | -0.051    | -0.047   | -0.164    | 0         | 0.087  | 0.304     | -0.172   | 0.22   |
| A001326_01 |    | -0.156 NA |          | 0.121     | 0.323     | -0.334 | -0.346 NA |          | 0.011  |
| A001329_01 |    | -0.006    | 0.095    | 0.237     | 0.2       | 0.2    | 0.081     | 0.096    | 0.054  |
| A001331_01 |    | 0.128 NA  |          | -0.032    | 0.2 NA    | NA     | NA        |          | 0.329  |
| A001332_01 |    | -0.241    | -0.156   | -0.207    | 0.087     | -0.286 | -0.274    | 0.223    | 0.161  |
| A001333_01 |    | -0.185    | -0.021   | -0.081    | -0.025    | 0.266  | 0.478     | 0.115    | 0.2    |
| A001334_01 |    | 0.244     | 0.274    | 0.088     | 0.274     | 0.074  | 0.033     | -0.065   | -0.156 |
| A001339_01 |    | 0.127     | 0.234    | -0.258    | -0.185    | 0.199  | 0.369     | 0.288    | 0.149  |
| A001340_01 |    | -0.425    | -0.038   | 0.134     | 0.231     | -1.07  | -1.168    | -0.201   | -0.125 |
| A001345_01 |    | 0.053     | -0.062   | 0.014     | -0.247    | 0.263  | 0.143     | 0.167    | 0.103  |
| A001347_01 | NA |           | 0.269    | -0.231 NA | NA        |        | -0.039 NA | NA       |        |
| A001348_01 |    | 0.021     | 0.021    | 0.136     | 0.192     | 0.049  | 0         | -0.041   | -0.095 |
| A001350_01 |    | -0.208    | -0.055   | 0.583     | 0.687     | 0.126  | 0.173     | -0.265   | -0.169 |
| A001351_01 |    | -0.306    | -0.142   | -0.308    | -0.001    | -0.271 | -0.016    | -0.166   | 0.002  |
| A001352_01 |    | -0.841 NA |          | -0.079 NA |           | 0.235  | 0.71 NA   |          | 0.828  |
| A001353_01 | NA |           | 0.036    | -0.114    | 0.055     | -0.109 | 0.165 NA  | NA       |        |
| A001355_01 |    | -2.422    | -1.911   | -2.371    | -2.006    | -3.224 | -3.759    | -2.285   | -1.789 |
| A001356_01 |    | 0.349     | 0.267    | -0.319    | -0.189    | -0.173 | -0.219    | 0.205    | 0.171  |
| A001357_01 |    | -0.241    | -0.272   | -1.097    | -0.886    | -0.776 | -0.809    | -0.354   | -0.239 |
| A001358_01 |    | -0.151 NA |          | 0.378     | 0.248 NA  |        | -0.213    | -0.022   | -0.202 |
| A001360_01 |    | -0.22     | 0.016    | -0.304    | -0.059    | 0.152  | 0.088     | 0.26     | 0.475  |
| A001363_01 |    | 0.212     | 0.257    | -0.144    | 0.073     | -0.292 | -0.302    | 0.024    | 0.123  |
| A001369_01 |    | -0.86 NA  |          | -0.303    | -0.181    | -1.219 | -0.834    | -0.273   | -0.044 |
| A001374_01 |    | -2.407    | -2.135   | -2.711    | -2.171    | -3.669 | -4.451    | -2.471   | -2.306 |
| A001375_01 |    | 0.293     | 0.326    | -0.12     | 0.186     | -0.002 | -0.038    | -0.161   | -0.206 |
| A001376_01 |    | 0.274     | 0.253    | 0.191     | 0.127     | -0.519 | -0.765    | -0.09    | -0.025 |
| A001378_01 |    | -0.04     | 0.121    | -0.025    | 0.208     | 0.012  | 0.118     | -0.052   | -0.106 |
| A001380_01 |    | -0.136    | -0.297   | 0.076     | 0.34      | -0.92  | -0.927    | -0.441   | -0.241 |
| A001387_01 | NA | NA        |          | -0.189    | -0.066 NA |        | -0.707    | -0.8     | -0.528 |
| A001389_01 |    | -0.149    | -0.155   | 0.121     | -0.053    | 0.187  | 0.184     | -0.018   | -0.06  |
| A001390_01 |    | -0.036    | -0.024   | -0.493    | -0.373    | 0.094  | 0.231     | 0.101    | 0.223  |
| A001392_01 |    | -0.428    | -0.058   | -0.179    | -0.258    | 0.499  | 0.915     | 0.009    | 0.251  |
| A001396_01 | NA | NA        |          | 0.986     | 1.081 NA  |        | 0.044     | -0.239   | -0.286 |

|            |    |           |        |           |           |        |           |          |        |
|------------|----|-----------|--------|-----------|-----------|--------|-----------|----------|--------|
| A001399_01 |    | 0.177     | 0.023  | 0.106     | 0.207     | -0.173 | -0.321    | -0.052   | -0.106 |
| A001400_01 |    | 0.103     | 0.045  | 0.03      | 0.071     | -0.088 | -0.01     | 0.049    | -0.049 |
| A001401_01 | NA |           | 0.162  | -0.065    | 0.012 NA  |        | -0.409    | 0.151    | 0.172  |
| A001409_01 |    | 0.127     | 0.282  | 0.023     | 0.165     | -0.086 | -0.061    | 0.057    | 0.378  |
| A001410_01 |    | 0.345     | 0.839  | -0.224    | 0.035     | 0.745  | 0.954 NA  |          | 0.22   |
| A001411_01 |    | 0.082     | 0.02   | -0.262    | 0.192     | -0.166 | -0.32     | -0.313   | -0.311 |
| A001412_01 |    | -0.158    | -0.156 | 0.055     | 0.044     | 0.42   | 0.405     | -0.017   | -0.083 |
| A001417_01 |    | -0.059 NA |        | 0.051     | 0.318     | -0.135 | 0.121 NA  | NA       |        |
| A001418_01 |    | -0.296    | -0.097 | 0.225     | 0.519 NA  |        | -0.092    | -0.166   | -0.231 |
| A001420_01 |    | -0.785    | -0.545 | -0.521 NA |           | -0.504 | -0.522 NA |          | -0.077 |
| A001421_01 |    | -0.139    | 0.13   | 0.316     | 0.416     | -0.097 | -0.081    | -0.229   | -0.174 |
| A001426_01 |    | 0.192     | 0.353  | -0.005    | 0.042     | -0.113 | -0.28     | -0.138   | -0.028 |
| A001428_01 |    | 0.103     | -0.022 | 0.218     | 0.272     | 0.28   | 0.375     | -0.272   | -0.164 |
| A001429_01 |    | -0.815    | -0.759 | -0.675    | -0.329 NA |        | -1.628    | -1.014   | -1.224 |
| A001432_01 |    | -0.277 NA |        | 0.109     | 0.139 NA  |        | -0.24     | -0.482   | -0.317 |
| A001435_01 |    | -0.515    | -0.466 | -1.78     | -1.413    | -0.577 | -0.596    | -0.184   | -0.402 |
| A001436_01 |    | -0.08     | -0.088 | 0.468     | 0.259     | -0.58  | -0.682 NA | NA       |        |
| A001441_01 |    | -0.026    | 0.086  | 0.171     | 0.139     | 0.299  | 0.502     | -0.13    | -0.088 |
| A001442_01 |    | -0.432    | -0.304 | 0.646     | 0.642     | 0.379  | 0.341     | 0.07     | -0.056 |
| A001445_01 |    | -0.209    | 0.064  | -0.043    | 0.219     | -0.143 | 0.156     | -0.325   | -0.153 |
| A001446_01 |    | -0.275    | -0.253 | -0.13     | -0.134    | -0.19  | -0.104    | -0.162   | -0.218 |
| A001448_01 |    | -0.297    | -0.161 | -0.091    | 0.028     | -0.116 | -0.031    | -0.384   | -0.284 |
| A001449_01 |    | -0.219 NA |        | 0.088     | 0.2 NA    | NA     | NA        |          | 0.236  |
| A001451_01 |    | 0.014     | 0.216  | -0.274    | -0.293    | 0.032  | 0.255     | -0.343   | -0.025 |
| A001452_01 |    | -0.386 NA |        | -0.007    | 0.02      | -0.071 | 0.034     | -0.163   | -0.1   |
| A001455_01 |    | -0.219    | 0.011  | -0.1      | -0.021    | -1.105 | -1.301    | -0.277   | -0.138 |
| A001457_01 |    | -0.161    | -0.081 | 0.007     | 0.117     | -0.219 | -0.137    | -0.066   | -0.005 |
| A001458_01 |    | 0.015     | 0.124  | -0.059    | 0.064     | 0.107  | 0.154     | -0.002   | 0.155  |
| A001460_01 |    | -0.162    | 0.243  | 0.01      | 0.098     | -0.727 | -0.432    | -0.35    | 0.147  |
| A001461_01 |    | -0.074 NA |        | 0.154     | 0.264     | -0.622 | -0.663    | -0.048   | 0.068  |
| A001465_01 |    | 0.015     | -0.074 | 0.006     | 0.249     | -0.192 | -0.189    | -0.049   | -0.19  |
| A001468_01 |    | 0.305     | 0.276  | -0.157    | 0.053     | -0.267 | -0.36     | -0.207   | -0.321 |
| A001471_01 |    | -1.309    | -1.258 | -0.821    | -0.342 NA |        | -1.369 NA |          | -0.443 |
| A001472_01 |    | 0.029     | 0.024  | -0.136    | -0.059    | 0.127  | 0.328     | 0.065    | 0.158  |
| A001474_01 |    | 0.169     | 0.177  | 0.004     | 0.059     | -0.03  | 0.092     | -0.065   | -0.005 |
| A001477_01 |    | 0.224     | 0.326  | 0.351     | 0.461     | 0.948  | 1.017     | 0.163    | 0.407  |
| A001480_01 |    | -0.282 NA |        | -0.163    | 0.386 NA  |        | -0.026 NA | NA       |        |
| A001481_01 |    | 0.231     | 0.34   | -0.244    | 0.115     | 0.365  | 0.546     | 0.265    | 0.313  |
| A001487_01 |    | -0.035    | 0.156  | 0.14      | 0.131     | 0.177  | 0.116     | -0.179   | 0.049  |
| A001488_01 |    | 0.229     | 0.316  | 0.206     | 0.292     | 0.123  | -0.042    | 0.078    | -0.015 |
| A001490_01 |    | 0.186     | 0.355  | 0.326     | 0.378     | -0.039 | -0.019    | -0.164   | -0.004 |
| A001495_01 |    | -0.153    | -0.015 | 0.231     | 0.432     | 0.081  | 0.206     | 0.035    | 0.042  |
| A001496_01 |    | 0.166     | 0.352  | -0.185 NA |           | -0.012 | -0.026 NA | NA       |        |
| A001507_01 |    | -0.448    | -0.334 | -0.095 NA |           | 0.404  | 0.633     | 0.033 NA |        |
| A001511_01 |    | -0.029    | 0.068  | -0.1      | -0.151    | 0.074  | 0.268     | 0.075    | 0.292  |
| A001513_01 |    | 0.253     | 0.452  | 0.2       | 0.234     | -0.32  | -0.464    | -0.022   | 0.156  |
| A001516_01 |    | -0.135 NA |        | -0.268    | -0.017    | 0      | 0.332     | 0.148    | 0.412  |
| A001518_01 | NA | NA        |        | -1.252    | -0.474 NA |        | -2.54     | -0.701   | -0.575 |
| A001529_01 |    | -0.043 NA |        | -0.142    | 0.326 NA  | NA     | NA        |          | 0.215  |
| A001536_01 |    | -0.07 NA  |        | -0.215    | 0.124     | -0.312 | -0.252    | -0.073   | -0.081 |
| A001537_01 | NA | NA        |        | 0.131     | 0.232 NA  |        | -1.035    | -0.038   | 0.08   |
| A001553_01 |    | 0.066     | 0.166  | 0.084     | 0.124     | -0.475 | -0.581    | -0.129   | -0.075 |
| A001558_01 |    | -0.031    | -0.293 | -0.124    | 0.05      | -0.754 | -0.727    | -0.059   | -0.209 |
| A001559_01 |    | -0.104 NA |        | 0.332     | 0.338 NA  |        | 0.347     | -0.39    | -0.216 |
| A001566_01 |    | -0.143    | -0.011 | 0.024     | 0.238     | -0.785 | -0.843    | -0.114   | 0.111  |
| A001567_01 |    | 0.261     | 0.256  | -0.28     | -0.148    | 0.237  | 0.161     | 0.234    | 0.191  |
| A001568_01 |    | 0.178 NA  |        | -0.48 NA  |           | 0.036  | 0.242 NA  | NA       |        |
| A001573_01 |    | -0.17     | -0.162 | -0.303    | 0.004     | 0.085  | 0.129 NA  | NA       |        |
| A001578_01 |    | -0.186    | -0.319 | -0.352    | -0.356    | -0.215 | -0.203    | -0.448   | -0.264 |
| A001586_01 |    | 0.036 NA  |        | -0.013    | 0.275     | -0.209 | -0.014 NA | NA       |        |
| A001593_01 |    | -0.43     | 0.195  | 0.254     | 0.419     | -0.597 | -0.474    | -0.65    | -0.121 |
| A001595_01 |    | -0.44     | -0.196 | -0.086    | 0.135     | 0.363  | 0.712     | -0.062   | 0.259  |
| A001601_01 |    | -0.244 NA |        | -0.367 NA | NA        |        | 0.124 NA  | NA       |        |
| A001602_01 |    | -0.343    | -0.15  | -0.212    | -0.013    | -0.533 | -0.434    | -0.131   | 0.238  |
| A001604_01 |    | -0.04     | 0.065  | 0.059     | 0.07      | 0.053  | 0.038     | -0.17    | 0.037  |
| A001605_01 |    | 0.076     | 0.267  | -0.042    | 0.018     | 0.26   | 0.312     | -0.135   | -0.015 |
| A001606_01 |    | -0.011    | 0.199  | 0.308     | 0.048     | 0.355  | 0.496     | -0.306   | -0.031 |
| A001609_01 |    | -0.094    | 0.045  | -0.019    | -0.148    | 0.441  | 0.64      | 0.285    | 0.402  |

|            |    |           |           |           |           |        |           |           |        |
|------------|----|-----------|-----------|-----------|-----------|--------|-----------|-----------|--------|
| A001610_01 |    | 0.556     | 0.528     | 0.053     | -0.115    | 0.391  | 0.402     | 0.197     | 0.299  |
| A001611_01 |    | 0.086 NA  |           | -0.289 NA | NA        | NA     | NA        |           | 0.021  |
| A001612_01 |    | -0.816    | -0.99     | -1.384    | -1.076    | -0.051 | 0.481     | -0.144    | 0.059  |
| A001613_01 |    | -0.129    | -0.086    | -0.27     | -0.342    | -0.094 | 0.005     | 0.2       | 0.386  |
| A001619_01 |    | 0.26      | 0.152     | -0.12     | -0.087    | -0.125 | -0.21     | -0.249    | -0.195 |
| A001621_01 |    | -0.068 NA |           | -0.669 NA |           | -0.383 | 1.213 NA  | NA        |        |
| A001624_01 |    | -0.035 NA |           | -0.415    | 0.068 NA  | NA     | NA        |           | 0.398  |
| A001631_01 |    | -0.289    | -0.22     | -1.099    | -0.882    | -0.819 | -0.917 NA | NA        |        |
| A001645_01 |    | -0.031    | 0.168     | 0.022     | 0.092     | -0.235 | -0.24 NA  |           | -0.093 |
| A001651_01 |    | -0.308 NA |           | -0.497    | -0.13     | -0.566 | -0.334 NA |           | 0.212  |
| A001652_01 |    | 0.15 NA   |           | 0.304     | 0.278 NA  | NA     | NA        |           | 0.313  |
| A001663_01 |    | 0.619     | 0.965     | 0.084     | 0.531 NA  |        | 0.177 NA  | NA        |        |
| A001664_01 |    | -0.019 NA |           | -0.022    | 0.329 NA  |        | -0.292 NA | NA        |        |
| A001670_01 |    | -0.685 NA |           | -0.286 NA |           | -0.274 | 0.012 NA  | NA        |        |
| A001671_01 |    | -0.589    | -0.184    | -0.063    | -0.028    | 0.212  | 0.562     | -0.057    | 0.204  |
| A001675_01 |    | -0.421    | -0.326    | -0.052    | -0.005    | 0.156  | 0.286     | -0.336    | -0.118 |
| A001677_01 |    | -0.151 NA |           | -0.187    | 0.105     | 0.146  | 0.33 NA   | NA        |        |
| A001678_01 |    | 0.149 NA  |           | -0.438    | -0.03 NA  |        | -0.046 NA |           | 0.246  |
| A001679_01 | NA |           | -0.874    | -0.258    | -0.126    | -1.003 | -1.129    | -1.495    | -1.5   |
| A001681_01 |    | 0.051     | -0.025    | -0.308    | 0.03      | -0.107 | 0.098     | -0.035    | 0.11   |
| A001683_01 |    | 0.019 NA  |           | -0.294    | -0.082 NA |        | -0.011 NA |           | 0.014  |
| A001693_01 |    | 0.035     | 0.133     | 0.11      | 0.145     | -0.768 | -0.436 NA |           | 0.061  |
| A001695_01 |    | -0.071 NA |           | -0.133    | 0.26 NA   |        | 0.273     | 0.074     | 0.499  |
| A001696_01 |    | -0.299 NA |           | -0.468    | 0.026 NA  |        | -0.063 NA |           | 0.456  |
| A001697_01 |    | -0.349    | -0.15     | -0.181    | -0.193    | 0.305  | 0.489     | -0.289 NA |        |
| A001711_01 |    | -0.197    | -0.296    | -0.084    | -0.117    | -0.475 | -0.408    | -0.098    | 0.162  |
| A001717_01 |    | 0.032     | 0.029     | -0.547    | -0.426    | -0.038 | -0.035    | -0.062    | 0.083  |
| A001719_01 |    | -0.393    | -0.243    | -0.244    | -0.157    | -0.137 | -0.065    | 0.019     | 0.236  |
| A001720_01 |    | -2.731    | -2.313 NA |           | -2.445    | -3.488 | -4.644 NA | NA        |        |
| A001728_01 |    | -0.036    | -0.002    | -0.081    | 0.072     | -0.021 | 0.154     | 0.054     | 0.246  |
| A001736_01 |    | 0.208     | 0.094     | 0.022     | 0.14      | 0.227  | 0.357     | -0.071    | -0.109 |
| A001740_01 |    | -0.411    | -0.238    | -0.177    | -0.048    | 0.06   | 0.172     | 0.238     | 0.425  |
| A001745_01 | NA |           | -0.346    | -0.314    | 0.31      | -0.485 | -0.308 NA | NA        |        |
| A001748_01 |    | -0.154    | 0.422     | 0.134     | 0.409     | -0.434 | -0.162    | -0.208    | 0.264  |
| A001750_01 |    | 0.019     | 0.016     | -0.238    | -0.115    | 0.07   | 0.213     | 0.067     | 0.131  |
| A001756_01 |    | 0         | 0.142     | -0.152    | 0.172     | 0.002  | 0.171 NA  |           | 0.395  |
| A001757_01 |    | 0.025     | 0.277     | -0.198    | -0.137    | 0.066  | 0.326     | 0.1       | 0.265  |
| A001758_01 |    | -0.498 NA |           | -0.311    | -0.021    | -0.17  | -0.013 NA |           | 0.331  |
| A001760_01 |    | -0.377 NA |           | 0.164     | 0.408     | -1.099 | -0.918 NA |           | -0.169 |
| A001770_01 |    | -0.226 NA |           | -0.129    | 0.195     | 0.913  | 1.241     | -0.125    | 0.475  |
| A001773_01 |    | 0.695     | 0.352     | -0.212    | -0.125    | 0.231  | 0.17      | 0.308     | 0.191  |
| A001779_01 |    | -0.179    | -0.071    | -0.361    | 0.046     | -0.849 | -0.761 NA |           | 0.028  |
| A001783_01 |    | -0.321 NA |           | -0.041    | -0.033 NA | NA     |           | 0.239     | 0.213  |
| A001785_01 |    | 0.113 NA  |           | -0.206    | 0.331     | 0.459  | 0.64 NA   | NA        |        |
| A001789_01 |    | -0.096    | 0.291     | 0         | 0.176     | 0.431  | 0.638 NA  |           | 0.057  |
| A001790_01 |    | -0.074    | 0.22      | 0.003     | -0.025    | 0.454  | 0.643     | -0.194    | -0.063 |
| A001791_01 |    | 0.112 NA  |           | -0.371    | -0.074 NA |        | -0.144    | -0.213    | 0.11   |
| A001800_01 |    | -0.364 NA |           | -1.164 NA |           | 0.442  | 0.64 NA   |           | 0.026  |
| A001801_01 |    | -0.219    | -0.213    | -0.366    | -0.229    | 0.324  | 0.354     | 0.211     | 0.256  |
| A001803_01 |    | -0.099    | 0.111     | -0.033    | 0.03      | -0.077 | 0.031     | -0.153    | 0.196  |
| A001804_01 |    | -0.108    | 0.008     | 0.033     | -0.168    | -0.097 | -0.117    | 0.04      | 0.041  |
| A001807_01 |    | -0.254 NA |           | -0.272    | -0.139 NA |        | 0.5 NA    |           | 0.202  |
| A001819_01 |    | -0.168 NA |           | -0.226 NA |           | -0.269 | 0.028 NA  |           | 0.413  |
| A001826_01 |    | 0.16      | -0.145    | -0.233    | -0.011    | -0.063 | -0.038    | -0.075    | -0.11  |
| A001827_01 |    | 0.452     | 0.78      | 0.215     | 0.395 NA  |        | 0.339     | -0.452    | -0.106 |
| A001833_01 |    | -0.016 NA |           | -0.132    | 0.06 NA   |        | 0.09      | -0.161    | 0.121  |
| A001838_01 |    | 0.023     | -0.021    | -0.296    | -0.109    | -0.043 | -0.028    | 0.124     | 0.296  |
| A001842_01 |    | 0.041     | 0.061     | -1.045 NA |           | -1.081 | -1.135 NA |           | 0.147  |
| A001843_01 |    | -0.411    | -0.482    | -0.286    | -0.185    | -0.377 | -0.3      | 0.109     | 0.179  |
| A001848_01 |    | 0.001     | 0.231     | -0.165    | 0.028     | 0.016  | 0.157     | -0.284    | 0.012  |
| A001861_01 |    | 0.46      | 0.603     | 0.169     | 0.264     | 0.285  | 0.239     | -0.171    | -0.007 |
| A001864_01 |    | -0.053    | 0.108     | 0.305     | 0.23      | 0.195  | 0.198     | 0.12      | 0.261  |
| A001865_01 |    | 0.045 NA  | NA        | NA        |           | 0.139  | 0.28 NA   |           | 0.599  |
| A001867_01 |    | -0.011 NA |           | -0.385 NA |           | -0.205 | -0.287 NA |           | 0.146  |
| A001868_01 |    | -0.056    | 0.032     | -0.309    | 0.225     | -0.106 | 0.03 NA   | NA        |        |
| A001869_01 |    | -0.005 NA |           | -0.09     | 0.224     | 0.267  | 0.454     | 0.127     | 0.155  |
| A001870_01 | NA | NA        |           | -0.245    | 0.231 NA  |        | -0.267 NA | NA        |        |
| A001874_01 |    | -0.105    | -0.016    | -0.369    | -0.141    | -0.657 | -0.507    | -0.181    | -0.05  |

|            |    |           |           |           |           |        |           |        |        |
|------------|----|-----------|-----------|-----------|-----------|--------|-----------|--------|--------|
| A001880_01 |    | 0.339     | 0.571     | -0.219    | 0.132     | -0.035 | 0.19      | 0.008  | 0.086  |
| A001883_01 |    | -0.028    | -0.066 NA |           | -0.121    | -0.472 | -0.408    | -0.001 | 0.178  |
| A001884_01 |    | -0.143 NA |           | -0.571    | -0.205    | -0.148 | -0.162 NA |        | 0.012  |
| A001886_01 |    | -0.267    | -0.083    | 0.073     | 0.244     | 0.094  | 0.401     | 0.091  | 0.185  |
| A001889_01 |    | -0.331    | -0.044    | -0.189    | 0.098     | -0.194 | 0.032     | -0.019 | 0.392  |
| A001894_01 |    | 0.019     | 0.105     | -0.163    | 0.279 NA  |        | -0.911 NA | NA     |        |
| A001898_01 |    | 0.048     | 0.2       | -0.053    | 0.08      | -0.404 | -0.503    | 0.11   | 0.092  |
| A001901_01 |    | -0.059    | 0.088     | 0.06      | 0.074     | 0.061  | 0.008     | 0.211  | 0.148  |
| A001903_01 |    | -0.072 NA |           | 0.661     | 0.737     | 0.101  | 0.038     | -0.16  | -0.421 |
| A001904_01 |    | -0.165    | -0.406    | -0.383    | -0.144    | -0.249 | -0.108    | -0.075 | -0.206 |
| A001912_01 |    | 0.203 NA  |           | -0.144    | 0.107 NA  |        | 0.465 NA  |        | 0.176  |
| A001913_01 |    | -0.297    | -0.191    | -0.234    | -0.152    | 0.025  | 0.095     | -0.208 | -0.173 |
| A001915_01 |    | 0.352     | 0.152     | -0.057    | 0.119     | -0.132 | -0.272    | -0.175 | -0.175 |
| A001917_01 |    | -0.031    | 0.047     | -0.391    | -0.418    | 0.315  | 0.503     | -0.31  | -0.072 |
| A001918_01 |    | 0.14      | 0.243     | 0.04      | -0.197    | 0.025  | -0.166    | -0.19  | 0.169  |
| A001920_01 |    | 0.042     | -0.123    | -0.028    | 0.154     | 0.127  | 0.136     | 0.053  | 0.009  |
| A001924_01 |    | -0.015    | -0.115    | -0.313    | -0.244    | -0.235 | -0.207 NA |        | 0.275  |
| A001929_01 | NA | NA        |           | 0.067     | 0.106 NA  |        | -0.528    | -0.076 | -0.073 |
| A001932_01 |    | 0.093 NA  | NA        |           | 0.145     | 0.134  | 0.214 NA  | NA     |        |
| A001934_01 |    | 0.461     | 0.499     | 0.026     | 0.213     | -0.259 | -0.335    | -0.432 | -0.24  |
| A001936_01 |    | -1.025    | -0.801    | 0.095     | 0.294     | 0.035  | 0.05      | 0.168  | 0.281  |
| A001937_01 |    | 0.086     | -0.002    | -0.819    | -0.604    | 0.193  | 0.233     | -0.264 | -0.172 |
| A001939_01 |    | -0.389 NA |           | 0.251     | 0.439 NA  |        | -0.028    | -0.545 | -0.441 |
| A001945_01 |    | 0.016     | 0.169     | -0.269    | 0.129     | 0.054  | 0.289     | 0.038  | 0.1    |
| A001946_01 |    | 0.206     | 0.274     | -0.257    | -0.08     | -0.076 | -0.058    | 0.17   | 0.163  |
| A001952_01 |    | -0.006    | -0.234    | -0.036    | -0.12     | 0.113  | 0.053     | -0.012 | -0.055 |
| A001957_01 |    | 0.245 NA  |           | 0.718     | 0.47 NA   |        | 0.245     | -0.4   | -0.255 |
| A001958_01 |    | 0.107 NA  |           | 0.271     | 0.222     | 0.268  | 0.265 NA  | NA     |        |
| A001959_01 |    | 0.011     | 0.183     | -0.002    | 0.243     | -0.051 | -0.027    | 0.007  | -0.13  |
| A001961_01 |    | 0.361 NA  |           | 0.141     | 0.383 NA  |        | 0.267 NA  |        | -0.035 |
| A001962_01 |    | -0.048    | -0.006    | -0.19     | -0.04     | 0.11   | 0.278     | -0.128 | 0.034  |
| A001963_01 |    | 0.056     | 0.031     | -0.342    | -0.056    | 0.1    | 0.226     | 0.068  | 0.061  |
| A001964_01 |    | -0.145    | -0.093    | 0.041     | 0.108     | -0.159 | -0.062 NA |        | 0.063  |
| A001966_01 |    | 0.209     | 0.183     | -0.078    | 0.097     | 0.012  | 0.17      | -0.151 | -0.239 |
| A001967_01 |    | -0.195    | 0.078     | 0.384     | 0.404     | -0.222 | -0.222 NA |        | -0.678 |
| A001970_01 |    | 0.024     | 0.107     | -0.485    | -0.389    | 0.124  | 0.074     | 0.065  | 0.084  |
| A001974_01 |    | 0.043     | -0.112    | -0.154    | -0.106    | 0.291  | 0.294     | 0.097  | 0.281  |
| A001975_01 |    | 0.175     | 0.133     | 0.186     | 0.132     | -0.312 | -0.493 NA |        | 0.07   |
| A001979_01 |    | -0.152    | -0.047    | -0.226    | -0.288    | 0.128  | 0.183     | 0.118  | 0.378  |
| A001980_01 |    | 0.407     | 0.65      | 0.388     | 0.764     | 0.007  | 0.114     | -0.27  | -0.184 |
| A001984_01 |    | -0.139 NA |           | 0.076     | -0.109 NA | NA     |           | -0.243 | -0.165 |
| A001986_01 |    | 0.202     | 0.209     | -0.068    | 0.01      | 0.273  | 0.452     | 0.215  | 0.325  |
| A001988_01 |    | -0.068    | 0.075     | 0.465     | 0.555     | -0.319 | -0.109    | -0.827 | -0.469 |
| A001990_01 |    | -0.422 NA |           | -0.292 NA | NA        | NA     | NA        | NA     |        |
| A001996_01 |    | -0.192 NA |           | -0.018    | -0.141    | -0.222 | -0.03 NA  | NA     |        |
| A001997_01 |    | 0.578     | 0.534     | 0.802     | 0.824     | 0.51   | 0.593     | -0.345 | -0.25  |
| A002002_01 |    | 0.144     | 0.2       | -0.094    | -0.006    | -0.61  | -0.824    | 0.028  | 0.014  |
| A002003_01 |    | 0.127 NA  | NA        |           | -0.036 NA |        | 0.197 NA  | NA     |        |
| A002008_01 |    | 0.6       | 0.883     | 0.014     | 0.069     | 0.256  | 0.448     | 0.31   | 0.53   |
| A002009_01 |    | -0.151    | 0.169     | -0.107    | -0.129    | 0.299  | 0.403     | 0.112  | 0.348  |
| A002011_01 |    | 0.487     | 0.508     | -0.395    | -0.254    | -0.166 | -0.373    | 0.195  | -0.065 |
| A002013_01 |    | 0.119     | 0.274     | 0.295     | 0.237     | 0.44   | 0.454     | -0.015 | 0.105  |
| A002014_01 |    | -0.212    | -0.042    | 0.174     | 0.074     | 0.374  | 0.499     | 0.177  | 0.196  |
| A002016_01 |    | -0.162 NA |           | 0.185     | 0.227 NA  |        | 0.005 NA  |        | 0.104  |
| A002017_01 |    | -0.021    | -0.234    | 0.294     | 0.482     | 0.659  | 0.925 NA  | NA     |        |
| A002023_01 |    | 0.054     | 0.102     | 0.087     | 0.295     | 0.464  | 0.709     | 0.194  | 0.176  |
| A002026_01 |    | -0.513    | -0.319    | -0.444    | -0.083    | -0.007 | 0.342     | -0.153 | -0.081 |
| A002031_01 |    | 0.495     | 0.373     | -0.417    | -0.243    | 0.666  | 0.612     | -0.103 | -0.19  |
| A002032_01 |    | 0.074     | 0.137     | -0.185    | -0.124    | 0.116  | 0.213     | -0.097 | 0.061  |
| A002033_01 |    | 0.043     | 0.058     | 0.067     | -0.061    | 0.175  | 0.186     | -0.119 | 0.029  |
| A002035_01 |    | -0.475    | -0.259    | -0.191    | -0.005    | -0.044 | 0.257     | 0.129  | 0.142  |
| A002037_01 |    | -0.194    | 0.299     | -0.326    | -0.282    | 0.237  | 0.571 NA  |        | 0.343  |
| A002038_01 |    | 0.159 NA  |           | 0.059     | 0.156     | 0.746  | 1.045 NA  |        | 0.133  |
| A002045_01 |    | 1.194     | 1.202     | 0.678     | 0.557     | 0.43   | 0.076     | -0.27  | -0.195 |
| A002050_01 |    | -0.365 NA |           | -0.366    | -0.311    | 0.416  | 0.441 NA  | NA     |        |
| A002052_01 |    | 0.142     | 0.005     | -0.089    | -0.007    | -0.166 | -0.051    | -0.12  | 0.047  |
| A002054_01 |    | -0.316    | -0.176    | -0.106    | -0.092    | 0.235  | 0.439     | -0.025 | 0.07   |
| A002059_01 |    | 0.081     | 0.404     | 0.471     | 0.406 NA  |        | -0.492    | -0.278 | -0.156 |

|            |    |           |          |           |           |        |           |          |        |
|------------|----|-----------|----------|-----------|-----------|--------|-----------|----------|--------|
| A002061_01 |    | 0.203 NA  |          | -0.307    | -0.074 NA |        | 0.259     | 0.175    | 0.01   |
| A002062_01 |    | -0.666    | -0.512   | 0.039     | 0.064     | -0.631 | -0.434    | 0.441    | 0.799  |
| A002065_01 |    | -0.259    | 0.023    | -0.324    | -0.184    | 0.359  | 0.549 NA  | NA       |        |
| A002066_01 |    | -0.386    | -0.287   | -0.075    | -0.104    | -0.006 | 0.012     | 0.131    | 0.097  |
| A002067_01 |    | -0.022    | 0.06     | 0.116     | 0.218     | 0.325  | 0.492 NA  | NA       |        |
| A002068_01 |    | -0.038    | -0.022   | -0.247    | -0.289    | 0.246  | 0.19      | 0.485    | 0.425  |
| A002070_01 |    | -0.332    | -0.229   | 0.727     | 0.662     | 1.278  | 1.576     | 0.368    | 0.508  |
| A002073_01 |    | 0.069     | 0.212    | -0.341    | -0.043    | -0.053 | 0.165     | -0.079   | -0.029 |
| A002075_01 |    | -0.125    | -0.027   | -0.039    | 0.05      | 0.359  | 0.457     | 0.08     | -0.064 |
| A002076_01 |    | 0.115     | 0.111    | 0.283     | 0.096     | 0.177  | 0.077     | -0.153   | -0.04  |
| A002079_01 |    | -0.732 NA |          | -0.072    | 0.055     | -0.178 | -0.086 NA |          | -0.142 |
| A002080_01 |    | -0.467    | -0.157   | 0.133     | 0.169     | -1.109 | -1.195    | -0.637   | -0.385 |
| A002081_01 |    | 0.282     | 0.287    | -0.124    | 0.162     | -0.541 | -0.782    | -0.632   | -0.614 |
| A002082_01 | NA |           | -0.248   | 0.646     | 0.774     | 0.304  | 0.481     | -0.129   | -0.147 |
| A002083_01 |    | -0.161 NA |          | 0.029     | -0.022    | -0.578 | -0.741 NA | NA       |        |
| A002085_01 |    | 0.191     | 0.179    | 0.186     | 0.112     | 0.227  | 0.133     | -0.247   | -0.013 |
| A002086_01 |    | -0.471    | -0.235   | 0.071     | 0.028     | -0.918 | -0.976    | -0.288   | -0.035 |
| A002087_01 |    | -1 NA     |          | -0.283    | -0.143    | 0.567  | 0.908 NA  |          | 0.44   |
| A002088_01 |    | 0.43      | 0.8      | 0.168     | 0.285 NA  |        | -0.626 NA |          | 0.193  |
| A002089_01 |    | -0.065    | 0.473 NA |           | 0.026 NA  |        | 0.146 NA  | NA       |        |
| A002090_01 |    | -0.377    | -0.218   | 0.127     | 0.242     | -0.242 | -0.177    | -0.026   | -0.033 |
| A002092_01 |    | 0.032 NA  |          | 0.012     | 0.075 NA  | NA     | NA        | NA       |        |
| A002094_01 |    | 0.15      | 0.222    | 0.235     | 0.313     | -0.689 | -0.674    | -0.552   | -0.439 |
| A002096_01 |    | 0.291     | 0.159    | -0.012    | 0.091     | 0.167  | 0.121     | -0.203   | 0.001  |
| A002102_01 |    | 0.064     | 0.227    | 0.592     | 0.671     | 1.008  | 1.172     | 0.045    | 0.092  |
| A002103_01 |    | 0.462     | 0.382    | 0.19      | 0.241     | 0.326  | 0.268     | -0.034   | -0.113 |
| A002116_01 |    | -0.197    | -0.143   | 0.244     | 0.199     | 0.167  | 0.206     | -0.203   | -0.193 |
| A002117_01 |    | 0.046 NA  |          | -0.05     | 0.079 NA  |        | -0.155 NA | NA       |        |
| A002118_01 |    | 0.487     | 0.959    | 0.124     | 0.037     | 0.27   | 0.362     | 0.018    | 0.554  |
| A002120_01 |    | 0.188     | 0.132    | -1.197    | -0.869    | 0.84   | 1.07      | 0.024    | -0.02  |
| A002126_01 |    | 0.439 NA  |          | 0.393     | 0.35 NA   | NA     | NA        |          | -0.201 |
| A002130_01 |    | -0.042 NA |          | -0.165 NA |           | 0.186  | 0.238 NA  | NA       |        |
| A002138_01 |    | 0.079     | 0.345    | 0.123     | 0.14      | 0.248  | 0.378     | -0.469   | -0.051 |
| A002142_01 |    | -0.541    | -0.281   | -0.306    | -0.066    | -0.293 | 0.04      | -0.263   | 0.127  |
| A002146_01 |    | -0.324    | -0.017   | -0.017    | 0.103     | -0.564 | -0.58     | -0.21    | -0.133 |
| A002147_01 |    | 0.041     | 0.151    | 0.01      | 0.127     | -0.048 | 0.112     | -0.084   | 0.021  |
| A002148_01 |    | -0.142    | -0.027   | 0.17      | 0.109     | -0.272 | -0.339    | -0.174   | -0.054 |
| A002149_01 |    | -0.256    | -0.085   | -0.254    | -0.114    | 0.394  | 0.771     | 0.065 NA |        |
| A002160_01 |    | 0.243     | 0.319    | 0.033     | -0.045    | 0.183  | 0.293     | 0.191    | 0.239  |
| A002165_01 |    | -0.355    | -0.134   | -0.49     | -0.438    | 0.178  | 0.352     | -0.177   | 0.092  |
| A002171_01 |    | -0.498 NA |          | -0.234    | 0.017 NA  |        | -0.097 NA |          | 0.264  |
| A002175_01 |    | 0.198 NA  |          | 0.325     | 0.185     | 0.053  | -0.068    | 0.143    | -0.049 |
| A002176_01 |    | 0.113     | 0.244    | -0.132    | 0.211     | 0.055  | 0.246     | -0.036   | 0.041  |
| A002178_01 |    | -0.046 NA |          | -0.218    | -0.205 NA |        | -0.026    | 0.172    | 0.207  |
| A002180_01 |    | 0.036 NA  |          | 0.21      | 0.281 NA  |        | 0.065 NA  | NA       |        |
| A002183_01 |    | -0.866 NA |          | 0.056     | 0.506 NA  |        | -0.523 NA | NA       |        |
| A002184_01 |    | 0.049     | 0.233    | -0.324    | -0.205    | 0.618  | 0.962 NA  |          | 0.285  |
| A002198_01 |    | -0.117 NA |          | 0.108     | 0.193 NA  | NA     | NA        | NA       |        |
| A002199_01 |    | -0.034 NA |          | 0.132     | 0.24 NA   |        | -0.397 NA |          | -0.007 |
| A002206_01 |    | 0.031     | 0.024    | -0.028    | -0.132    | -0.053 | -0.065    | 0.003    | -0.037 |
| A002210_01 |    | 0.411     | 0.453    | -0.098    | 0.248     | -0.261 | -0.268    | -0.158   | -0.124 |
| A002214_01 |    | 0.25      | 0.286    | -0.121    | 0.02      | 0.166  | 0.18      | 0.159    | 0.147  |
| A002218_01 | NA |           | NA       | -0.56     | -0.362 NA |        | 0.462     | 0.076    | 0.246  |
| A002220_01 |    | 0.053     | -0.012   | -0.474    | -0.507    | 0.063  | -0.027    | -0.03    | -0.116 |
| A002224_01 |    | -0.069    | 0.351    | -0.186    | -0.06     | 0.119  | 0.316 NA  |          | 0.457  |
| A002230_01 |    | -0.134    | 0.104    | 0.109     | -0.134    | 0.443  | 0.467     | -0.246   | -0.094 |
| A002232_01 |    | 0.683     | 0.632    | 0.371     | 0.564     | 0.225  | 0.147 NA  | NA       |        |
| A002235_01 |    | -0.13 NA  |          | 0.148     | 0.605     | 1.029  | 1.434     | 0.38     | 0.609  |
| A002237_01 |    | 0.122     | 0.174    | -0.276    | -0.135    | 0.053  | 0.074     | -0.141   | 0.184  |
| A002243_01 |    | 0.089     | 0.151    | -0.051    | 0.248     | -0.045 | -0.008    | 0.02     | 0.143  |
| A002244_01 |    | 0.237     | 0.109    | 0.067     | 0.018     | 0.392  | 0.479     | -0.021   | 0.17   |
| A002246_01 |    | 0.103 NA  |          | -0.174    | -0.04     | -0.423 | -0.467 NA |          | -0.099 |
| A002258_01 |    | 0.176     | 0.337    | 0.068     | 0.168     | -0.392 | -0.411    | 0.07     | 0.056  |
| A002259_01 |    | 0.123     | 0.189    | -0.384    | -0.196    | 0.023  | -0.023 NA |          | 0.09   |
| A002260_01 |    | 0.322     | 0.644    | -0.071    | 0.113     | 0.306  | 0.259     | 0.146    | 0.496  |
| A002266_01 |    | 0.192     | 0.508    | 0.052     | 0.043     | 0.142  | -0.013    | -0.157   | -0.027 |
| A002267_01 |    | 0.056 NA  |          | 0.501     | 0.641     | 0.536  | 0.955 NA  |          | -0.095 |
| A002272_01 |    | -0.071 NA |          | -0.204    | -0.387    | -0.053 | 0.168 NA  |          | 0.195  |

|            |    |           |           |           |           |           |           |           |        |
|------------|----|-----------|-----------|-----------|-----------|-----------|-----------|-----------|--------|
| A002283_01 |    | 0.215     | 0.129 NA  |           | 0.097     | 0.114     | 0.218 NA  | NA        |        |
| A002284_01 |    | 0.043 NA  |           | -0.067    | -0.181    | -0.565 NA |           | 0.168     | 0.231  |
| A002285_01 |    | -0.287    | -0.198    | -0.507    | -0.142    | -0.207    | -0.065 NA | NA        |        |
| A002294_01 |    | 0.055     | -0.105    | -0.171    | 0.146     | 0.485     | 0.605     | 0.243     | 0.215  |
| A002308_01 |    | -0.012    | 0.204     | -0.488 NA |           | -0.454    | -0.598 NA |           | 0.295  |
| A002329_01 |    | 0.111     | 0.163     | -0.05     | 0.278     | -0.239    | -0.128    | -0.242    | 0.003  |
| A002330_01 |    | 0.157     | 0.332     | -0.181    | 0.215     | -0.127    | -0.074    | -0.217    | 0.034  |
| A002338_01 |    | 0.087     | 0.098     | -0.207    | 0.115     | -0.105    | 0.08      | -0.093 NA |        |
| A002345_01 |    | 0.107     | 0.294     | -0.368    | -0.055    | 0.004     | 0.133     | -0.025    | 0.154  |
| A002346_01 |    | 0.209     | 0.227     | -0.257    | -0.09     | 0.1       | 0.183     | -0.11     | 0.068  |
| A002349_01 |    | -0.127    | -0.043    | -0.552    | -0.11     | 0.365     | 0.936 NA  |           | 0.239  |
| A002356_01 |    | -0.097 NA |           | -0.15     | 0.22      | 0.089     | 0.199 NA  |           | 0.275  |
| A002359_01 |    | 0.331     | 0.283     | -0.026    | 0.229     | -0.074    | -0.146    | 0.095     | 0.005  |
| A002363_01 |    | 0.171     | 0.039     | -0.536    | -0.401    | 0.31      | 0.436     | 0.37      | 0.406  |
| A002365_01 |    | 0.548 NA  |           | 0.013     | 0.202     | 0.094     | 0.155 NA  |           | 0.225  |
| A002368_01 |    | 0.068     | 0.039     | -0.096    | -0.392    | 0.041     | 0.018     | 0.017     | 0.162  |
| A002369_01 |    | -0.226    | -0.02     | -0.009    | -0.039    | 0.163     | 0.407     | -0.296    | -0.147 |
| A002370_01 |    | -0.049 NA |           | -0.349    | -0.2      | -0.007    | -0.12 NA  |           | 0.19   |
| A002372_01 |    | -0.167    | -0.09     | -0.424    | -0.116    | -0.2      | 0.066     | 0.004     | 0.076  |
| A002374_01 |    | -0.22     | -0.216    | 0.234     | 0.407     | 0.247     | 0.375 NA  | NA        |        |
| A002376_01 |    | 0.238 NA  | NA        |           | 0.168 NA  |           | 0.4 NA    |           | 0.582  |
| A002378_01 |    | 0.172     | 0.138     | -0.246    | -0.022    | 0.217     | 0.293 NA  |           | 0.398  |
| A002383_01 |    | -0.05     | 0.085 NA  |           | 0.472     | 0.247     | 0.303     | -0.371    | -0.174 |
| A002385_01 |    | 0.081     | 0.141     | -0.599    | -0.237    | 0.436     | 0.378 NA  | NA        |        |
| A002387_01 |    | 0.514     | 0.127     | -0.278    | -0.156    | 0.33      | 0.324     | 0.35      | 0.214  |
| A002390_01 |    | -0.321 NA |           | -0.216    | 0.168     | -0.252    | -0.159 NA |           | 0.339  |
| A002393_01 |    | -0.227    | -0.118    | -0.231    | -0.021    | 0.128     | 0.342     | -0.073    | 0.086  |
| A002405_01 |    | 0.046 NA  |           | -0.369    | -0.162 NA |           | 0.025 NA  | NA        |        |
| A002408_01 |    | -0.213    | -0.304    | -0.414    | -0.183    | 0.482     | 0.852     | 0.246     | 0.384  |
| A002409_01 |    | -0.984    | -0.749 NA | NA        |           | -2.467    | -2.984 NA | NA        |        |
| A002412_01 |    | 0.078 NA  |           | -0.127    | 0.231     | -0.03     | -0.176    | 0.028     | 0.013  |
| A002413_01 | NA | NA        |           | -0.067    | 0.379 NA  | NA        | NA        |           | 0.201  |
| A002417_01 |    | -0.174 NA |           | -0.401    | -0.027    | 0.216     | 0.535 NA  |           | 0.091  |
| A002418_01 |    | -0.685    | -0.697    | -1.638    | -1.209    | -1.657    | -1.972    | -1.497    | -1.371 |
| A002425_01 |    | -0.261    | -0.158    | -0.534    | -0.021    | -0.161    | 0.065     | 0.197     | 0.464  |
| A002429_01 |    | -0.103 NA |           | -0.382    | 0.002     | 0.118     | 0.252 NA  |           | 0.077  |
| A002432_01 |    | -0.241    | 0.018     | -0.068    | -0.034    | -0.16     | -0.129    | -0.301    | 0.081  |
| A002433_01 |    | -3.007    | -2.399    | -3.278    | -2.44     | -4.024 NA | NA        | NA        |        |
| A002437_01 |    | -0.113    | 0.121     | -0.291    | -0.097    | -0.479    | 0.079     | -0.644    | -0.409 |
| A002441_01 |    | 0.194     | 0.269 NA  |           | 0.055     | -0.203    | -0.022    | -0.047    | 0.041  |
| A002454_01 |    | -0.065    | 0.079     | -0.059    | 0.065     | 0.716     | 1.019 NA  |           | 0.572  |
| A002461_01 |    | 0.103 NA  |           | 0.018     | 0.207 NA  |           | -0.362    | 0.088     | 0.074  |
| A002473_01 |    | 0.22      | 0.487     | -0.227    | -0.302    | 0.209     | 0.037     | 0.001     | 0.117  |
| A002476_01 |    | 0.498     | 0.448     | -0.097    | 0.165     | 0.054     | 0.775     | 0.074     | 0.594  |
| A002480_01 | NA | NA        |           | -0.272    | -0.069 NA | NA        |           | 0.108     | 0.283  |
| A002484_01 |    | -0.26     | -0.16     | -0.112    | 0.222     | -0.517    | -0.583    | -0.058    | 0.002  |
| A002488_01 |    | 0.16      | 0.393     | 0.073     | 0.052     | 0.445     | 0.39      | -0.081    | -0.02  |
| A002489_01 |    | -0.01 NA  |           | -0.072 NA | NA        |           | 0.161 NA  |           | 0.147  |
| A002491_01 |    | 0.571     | 0.299     | 0.03      | 0.085     | -0.195    | -0.488    | -0.213    | -0.386 |
| A002506_01 |    | 0.228 NA  |           | 0.095     | 0.243     | 0.092     | -0.107 NA |           | -0.109 |
| A002514_01 |    | -0.753    | -0.591    | 0.9       | 1.082     | 1.212     | 1.636     | 0.468     | 0.49   |
| A002522_01 |    | -0.148    | -0.024    | -0.184    | -0.017    | 0.253     | 0.366 NA  | NA        |        |
| A002523_01 |    | -0.094    | 0.154     | 0.245     | 0.177     | -0.311    | -0.192    | -0.175    | 0.32   |
| A002525_01 |    | 0.718 NA  |           | 0.832     | 0.731     | 0.765     | 0.864     | -0.035    | 0.074  |
| A002534_01 |    | -0.146    | -0.264    | -0.34     | -0.113    | -0.266    | -0.31     | 0.242     | 0.299  |
| A002535_01 | NA |           | 0.128     | -0.001    | 0.063 NA  |           | -0.021    | -0.043    | 0.287  |
| A002537_01 |    | -0.213 NA | NA        | NA        |           | -0.067    | 0.255 NA  | NA        |        |
| A002539_01 |    | 0.76      | 0.701     | 0.567     | 0.511 NA  |           | -0.086    | -0.241    | -0.232 |
| A002540_01 |    | -0.267    | -0.093    | -0.211    | -0.038    | -0.33     | -0.043    | -0.107    | 0.272  |
| A002542_01 |    | 0.028     | 0.287     | -0.41 NA  |           | 0.21      | 0.334 NA  |           | 0.103  |
| A002545_01 |    | -0.118    | -0.327    | -0.111    | 0.01      | -0.038    | -0.147    | -0.105    | -0.166 |
| A002557_01 |    | -0.332 NA |           | -0.203    | 0.054     | -0.12     | 0.059 NA  |           | 0.185  |
| A002558_01 |    | 0.213     | 0.199     | 0.083     | -0.032    | 0.278     | 0.317     | -0.116    | -0.082 |
| A002560_01 |    | -0.068 NA |           | -0.282 NA |           | 0.219     | 0.257 NA  |           | 0.151  |
| A002561_01 |    | 0.159     | 0.046     | 0.186     | 0.323     | 0.3       | 0.273     | -0.061    | -0.024 |
| A002562_01 |    | -0.547    | -0.296    | -0.007    | -0.031    | -0.303    | -0.164    | 0.003     | 0.22   |
| A002580_01 |    | -1.262    | -0.809    | 0.196     | 0.304     | 0.934     | 1.4       | 0.797     | 0.891  |
| A002588_01 |    | -0.438    | -0.216    | 0.145     | 0.11      | 0.232     | 0.292     | -0.134    | -0.034 |

|            |           |          |           |           |        |           |          |        |
|------------|-----------|----------|-----------|-----------|--------|-----------|----------|--------|
| A002592_01 | 0.211     | 0.406    | 0.056     | 0.135     | 0.209  | 0.153     | -0.02    | 0.227  |
| A002599_01 | -0.455    | -0.571   | -0.135    | 0.193     | 0.073  | 0.307     | 0.057    | 0.556  |
| A002608_01 | -0.061    | -0.057   | 0.053     | 0.25      | -0.216 | -0.233    | -0.093   | -0.284 |
| A002609_01 | -0.118 NA |          | -0.353 NA |           | 0.356  | 0.567 NA  |          | 0.28   |
| A002610_01 | -0.212    | -0.125   | -0.122    | -0.076    | -0.128 | -0.214    | 0.038    | 0.018  |
| A002618_01 | -0.039    | 0.164    | 0.333     | 0.61      | -0.301 | -0.296 NA | NA       |        |
| A002623_01 | 0.366 NA  |          | 0.405     | 0.472 NA  | NA     | NA        | NA       |        |
| A002626_01 | -0.158 NA |          | -0.131    | 0.131 NA  |        | -0.026 NA |          | 0.181  |
| A002632_01 | -0.111 NA |          | -0.025    | 0.124     | 0.094  | 0.103 NA  |          | 0.143  |
| A002634_01 | -0.087    | 0.075    | -0.036    | -0.164    | 0.323  | 0.514     | -0.182   | 0.15   |
| A002641_01 | -0.046    | 0.251    | 0.016     | 0.254     | 0.043  | 0.047     | 0.004    | 0.148  |
| A002642_01 | 0.092     | 0.145    | -0.138    | 0.142     | 0.092  | 0.083     | 0.088 NA |        |
| A002643_01 | 0.232     | 0.142    | -1.709    | -1.426    | -2.384 | -3.063    | -1.493   | -1.341 |
| A002644_01 | -0.288 NA |          | -0.161    | -0.161 NA | NA     |           | 0.238    | 0.219  |
| A002646_01 | 0.234     | 0.005    | 0.01      | -0.05     | 0.161  | -0.157    | 0.128    | -0.027 |
| A002647_01 | -0.418    | -0.478   | -0.258    | -0.032    | -0.682 | -0.736    | -0.462   | -0.495 |
| A002648_01 | 0.126     | 0.109    | 0.173     | 0.096     | 0.17   | 0.169     | -0.241   | -0.228 |
| A002650_01 | 0.806     | 0.662    | 0.137     | 0.392     | 0.932  | 0.852     | 0.522    | 0.385  |
| A002651_01 | 0.306     | 0.591    | 0.337     | 0.357     | -0.128 | -0.224    | -0.528   | -0.356 |
| A002656_01 | -0.308    | -0.225   | -0.35     | -0.127    | -0.502 | -0.3      | -0.112   | 0.042  |
| A002658_01 | 0.079     | 0.092    | -0.33     | -0.245    | -0.1   | -0.189    | 0.216    | 0.105  |
| A002659_01 | -0.069    | 0.104 NA |           | 0.109     | 0.032  | 0.083 NA  |          | 0.016  |
| A002660_01 | NA        | NA       | -0.015    | -0.091 NA |        | -0.111    | 0.043    | 0.023  |
| A002662_01 | -0.071    | 0.092    | -0.111    | 0.006     | -0.221 | -0.306    | -0.104   | -0.084 |
| A002672_01 | -0.196    | -0.217   | -0.125    | -0.148    | 0.329  | 0.436 NA  |          | 0.122  |
| A002674_01 | 0.359 NA  |          | 0.036     | 0.226     | 0.628  | 0.855     | 0.11     | 0.133  |
| A002675_01 | 0.107     | -0.092   | -0.036    | 0.009     | 0.015  | -0.011    | 0.194    | 0.085  |
| A002676_01 | 0.888     | 0.929    | 0.364     | 0.262     | 0.336  | -0.021    | 0.132    | 0.152  |
| A002677_01 | 0.031     | -0.022   | 0.594     | 0.529     | -0.721 | -0.966    | -0.528   | -0.684 |
| A002678_01 | -0.025 NA |          | 0.189 NA  |           | -0.109 | 0.131 NA  | NA       |        |
| A002692_01 | -0.085    | -0.074   | -0.078    | 0.094     | 0.219  | 0.3       | -0.044   | -0.063 |
| A002695_01 | -0.722    | -0.512   | 0.113     | 0.321     | -1.107 | -0.958    | -0.862   | -0.857 |
| A002696_01 | -0.16     | -0.13    | -0.842    | -0.672    | -0.783 | -0.934    | 0.157    | 0.076  |
| A002699_01 | 0.083 NA  |          | -0.253    | -0.263 NA |        | -0.01 NA  | NA       |        |
| A002702_01 | 0.577     | 0.295    | -0.159    | 0.044     | 0.276  | 0.258     | 0.106    | -0.127 |
| A002703_01 | 0.1 NA    |          | 0.076 NA  |           | 0.179  | 0.32 NA   |          | 0.106  |
| A002704_01 | 0.111     | 0.233    | 0.329     | 0.407     | 0.266  | 0.342     | -0.187   | -0.03  |
| A002706_01 | 0.157 NA  |          | -0.25     | 0.077 NA  |        | 0.062 NA  | NA       |        |
| A002712_01 | -0.504    | -0.126   | 0.339     | 0.284     | 0.307  | 0.681     | 0.097    | 0.377  |
| A002713_01 | 0.14      | 0.035    | -0.158    | -0.13     | -0.007 | -0.054    | 0.035    | 0.066  |
| A002718_01 | 0.189 NA  |          | -0.19     | 0.02 NA   |        | -0.173    | 0.009    | -0.138 |
| A002721_01 | 0.033 NA  |          | -0.279    | -0.185 NA |        | 0.257 NA  |          | 0.117  |
| A002724_01 | -0.017    | 0.117    | 0.1       | -0.187    | 0.074  | 0.098 NA  |          | 0.088  |
| A002732_01 | 0.349     | 0.341    | 0.121     | 0.133     | 0.357  | 0.327     | 0.108    | 0.182  |
| A002733_01 | 0.298     | 0.306    | -0.374    | -0.007    | -0.173 | -0.126    | 0.173    | 0.076  |
| A002735_01 | -0.054    | 0.129    | -0.125    | -0.028    | 0.063  | 0.228     | -0.015   | 0.229  |
| A002736_01 | -0.101    | -0.101   | -0.459    | -0.172    | -0.056 | 0.089     | -0.069   | 0.084  |
| A002737_01 | 0.232     | 0.376    | 0.022     | 0.006     | -0.025 | -0.102    | 0.042    | 0.09   |
| A002738_01 | 0.123     | 0.067    | 0.201     | 0.369     | -0.263 | -0.433    | 0.052    | -0.012 |
| A002741_01 | -1.855    | -1.071   | 0.353     | 0.56      | -2.107 | -2.67     | -0.872   | -0.985 |
| A002742_01 | 0.078     | 0.043    | 0.56      | 0.544     | 0.039  | 0.071     | -0.136   | -0.143 |
| A002744_01 | 0.422     | 0.294    | -0.024    | -0.226    | 0.286  | 0.14      | 0.135    | 0.111  |
| A002750_01 | -0.006 NA |          | 0.078     | 0.231     | -0.097 | 0.009 NA  |          | -0.105 |
| A002762_01 | 0.33      | 0.52     | -0.041    | -0.125    | 0.614  | 0.819     | 0.06     | 0.108  |
| A002768_01 | 0.118     | 0.042    | -0.221    | -0.038    | -0.386 | -0.373    | 0.108    | 0.228  |
| A002772_01 | -0.161    | 0.094    | -0.278    | -0.233    | -0.254 | -0.159    | 0.148    | 0.404  |
| A002773_01 | -0.121 NA |          | 0.101     | 0.048 NA  |        | 0.112 NA  |          | -0.069 |
| A002774_01 | -0.123    | -0.082   | 0.001     | 0.08      | -0.138 | -0.09     | -0.202   | -0.038 |
| A002777_01 | 0.009 NA  |          | -0.119    | 0.235     | 0.033  | 0.103 NA  | NA       |        |
| A002779_01 | -0.129    | -0.189   | 0.122     | 0.303     | -0.394 | -0.265    | -0.069   | -0.055 |
| A002780_01 | 0.049 NA  |          | 0.081     | 0.291 NA  |        | 0.607 NA  |          | 0.049  |
| A002782_01 | -0.904 NA |          | -0.324    | -0.11     | -0.614 | -0.464 NA | NA       |        |
| A002787_01 | -0.615    | -0.259   | -0.132    | 0.083     | -1.264 | -1.195    | -0.485   | -0.244 |
| A002788_01 | 0.216     | 0.232    | -0.13     | -0.081    | 0.439  | 0.487     | -0.068   | 0.009  |
| A002793_01 | 0.19      | 0.021    | -0.073    | -0.116    | 0.06   | 0.028     | 0.066    | 0.014  |
| A002795_01 | -0.075    | 0.037    | -0.151 NA |           | 0.039  | 0.192 NA  | NA       |        |
| A002797_01 | 0.044 NA  |          | -0.053    | 0.006     | -0.22  | -0.258    | -0.178   | -0.114 |
| A002798_01 | 0.503     | 0.309    | 0.106     | 0.339     | 0.282  | 0.342     | -0.052   | -0.097 |



|            |    |           |        |           |           |        |           |           |        |
|------------|----|-----------|--------|-----------|-----------|--------|-----------|-----------|--------|
| A002800_01 |    | 0.05      | 0.266  | -0.215    | -0.241    | -0.066 | 0.076     | -0.066    | 0.191  |
| A002809_01 |    | 0.079 NA  |        | -0.333    | -0.365    | -0.048 | -0.007    | 0.345     | 0.179  |
| A002818_01 |    | 0.19      | 0.111  | -0.302    | -0.541    | 0.592  | 0.872     | 0.393     | 0.463  |
| A002820_01 |    | 0.127     | 0.465  | -0.202    | -0.54     | -0.011 | -0.053    | 0.465     | 0.552  |
| A002822_01 |    | -0.079    | -0.092 | 0.123     | 0.07      | -0.079 | -0.062    | 0.012     | 0.008  |
| A002823_01 |    | 0.249     | 0.147  | -0.15     | -0.139    | -0.254 | -0.279    | 0.125     | 0.205  |
| A002830_01 |    | 0.082     | 0.124  | -0.305    | -0.126    | -0.024 | 0.003     | 0.205     | 0.106  |
| A002834_01 |    | -0.157    | 0.123  | -0.107    | 0.043     | 0.236  | 0.637     | -0.018    | 0.155  |
| A002838_01 | NA |           | 0.17   | -0.196    | -0.099 NA |        | -0.288    | 0.312     | 0.2    |
| A002841_01 |    | -0.299    | -0.179 | -0.179    | 0.017     | -0.203 | -0.099    | -0.177    | -0.051 |
| A002842_01 |    | -0.456    | -0.469 | -0.366    | -0.057    | -0.393 | -0.302    | -0.125    | 0.023  |
| A002851_01 |    | 0.114     | 0.06   | 0.318     | 0.379     | 0.076  | 0.1       | -0.21     | -0.186 |
| A002854_01 |    | 0.075     | 0.089  | -0.477    | -0.375    | 0.56   | 0.668     | 0.444     | 0.364  |
| A002855_01 |    | -0.251    | 0.085  | -0.233    | -0.125    | 0.415  | 0.669     | 0.023     | 0.141  |
| A002858_01 |    | -0.176    | -0.118 | -0.12     | -0.15     | -0.053 | -0.084    | -0.003    | -0.111 |
| A002863_01 |    | 0.398     | 0.32   | 0.147     | 0.256     | 0.213  | 0.242     | 0.13      | 0.025  |
| A002866_01 |    | -0.336 NA |        | -0.129 NA | NA        |        | 0.158 NA  | NA        |        |
| A002869_01 |    | 0.272     | 0.325  | 0.013     | 0.015     | 0.027  | 0.155     | -0.298    | -0.2   |
| A002871_01 |    | 0.235     | 0.014  | -0.247    | -0.243    | 0.149  | 0.149     | 0.465     | 0.358  |
| A002875_01 |    | 0.101 NA  |        | 0.01      | 0.119     | -0.491 | -0.565 NA | NA        |        |
| A002881_01 |    | -0.013 NA | NA     |           | 0.161 NA  |        | -0.864 NA | NA        |        |
| A002895_01 |    | -0.273    | -0.47  | 0.215     | 0.243     | 0.16   | 0.143     | 0.191     | 0.217  |
| A002896_01 |    | -0.137    | -0.175 | -0.148 NA |           | 0.083  | -0.033 NA |           | 0.126  |
| A002898_01 |    | 0.161 NA  |        | -0.151    | -0.1      | 0.384  | 0.524 NA  |           | 0.229  |
| A002901_01 |    | 0.053 NA  |        | -0.079    | -0.049 NA |        | -0.29     | 0.149     | 0.087  |
| A002902_01 | NA |           | 0.155  | -0.184    | -0.261    | 0.367  | 0.242     | -0.039    | 0.116  |
| A002904_01 |    | 0.203     | 0.169  | -0.144    | -0.058    | -0.08  | -0.191    | 0.146     | 0.091  |
| A002907_01 |    | -0.217    | -0.231 | 0.117     | 0.128     | 0.072  | 0.118     | 0.312     | 0.264  |
| A002908_01 | NA |           | -0.128 | 0.237     | 0.078     | -0.109 | -0.034    | -0.127    | 0.079  |
| A002916_01 |    | 0.504     | 0.711  | -0.036    | 0.152     | -0.162 | -0.293    | 0.046     | 0.062  |
| A002917_01 |    | 0.189     | 0.227  | -0.323    | -0.028    | -0.586 | -0.686    | -0.325    | -0.307 |
| A002919_01 |    | -0.043    | 0.103  | 0.138     | 0.15      | 0.155  | 0.38      | 0.044     | 0.2    |
| A002922_01 |    | 0.002     | 0.074  | -0.168    | -0.155    | 0.49   | 0.735     | 0.069     | 0.167  |
| A002923_01 |    | -0.054    | 0.511  | -0.207    | -0.248    | 0.735  | 1.05      | 0.319     | 0.825  |
| A002934_01 |    | 0.039 NA  |        | -0.047    | 0.07      | 0.121  | 0.123 NA  |           | 0.07   |
| A002939_01 | NA |           | 0.055  | -0.118    | -0.035 NA |        | -0.129    | 0.106     | 0.127  |
| A002940_01 |    | 0.022     | -0.072 | 0.099     | 0.253     | 0.242  | 0.15      | 0.205     | 0.137  |
| A002946_01 |    | -0.257    | -0.403 | 0.354     | 0.447     | -0.587 | -0.464    | 0.052     | -0.107 |
| A002950_01 |    | 0.179     | 0.132  | -0.007    | 0.175     | 0.592  | 0.86      | 0.092     | 0.22   |
| A002952_01 |    | 0.058     | 0.185  | -0.214    | -0.352    | 0.253  | 0.219     | -0.148    | -0.058 |
| A002955_01 |    | 0.059 NA  |        | -0.142    | -0.007 NA |        | -0.216    | -0.069    | -0.162 |
| A002958_01 |    | 0.014 NA  |        | 0.422     | 0.601 NA  | NA     | NA        |           | -0.087 |
| A002977_01 |    | -0.124    | -0.217 | -0.206    | -0.13     | -0.121 | -0.144    | 0.184     | 0.039  |
| A002982_01 |    | 0.249 NA  |        | -0.012    | -0.079    | -0.245 | -0.391    | 0.177     | -0.107 |
| A002988_01 |    | -0.123    | 0.023  | 0.038 NA  |           | 1.158  | 1.595 NA  | NA        |        |
| A002991_01 |    | -0.181    | -0.272 | -0.332    | -0.236    | -0.313 | -0.178    | -0.049    | 0.028  |
| A002993_01 |    | -0.022    | 0.165  | 0.151     | -0.06     | 0.255  | 0.247     | -0.005    | 0.151  |
| A002997_01 |    | -0.204 NA |        | -0.065    | 0.079     | 0.121  | 0.22 NA   |           | 0.574  |
| A002998_01 |    | 0.205     | 0.171  | 0.194     | 0.31      | 0.079  | 0.032     | 0.138     | 0.115  |
| A002999_01 |    | -0.414    | -0.397 | -0.92     | -0.777    | -0.694 | -0.61     | -1.578    | -1.215 |
| A003001_01 |    | 0.235     | 0.075  | -0.158    | -0.08     | 0.062  | -0.011    | 0.186     | -0.014 |
| A003003_01 |    | -0.129    | -0.048 | -0.153    | -0.203    | -0.046 | 0.097 NA  | NA        |        |
| A003004_01 |    | -0.179    | 0.104  | 0.01      | -0.016    | 0.347  | 0.542     | -0.047    | -0.013 |
| A003006_01 |    | -0.275    | -0.33  | -0.14     | 0.06      | -0.539 | -0.695    | 0.174     | 0.084  |
| A003011_01 |    | 0.107     | 0.02   | -0.121    | -0.129    | 0.252  | 0.354     | 0.195     | 0.366  |
| A003012_01 |    | 0.043 NA  |        | 0.111     | 0.349     | 0.382  | 0.526     | 0.223     | 0.194  |
| A003016_01 |    | -0.098    | -0.014 | -0.426    | -0.278    | 0.277  | 0.545     | 0.26      | 0.506  |
| A003018_01 |    | -0.502    | -0.322 | -0.532    | -0.366    | 0.146  | 0.618     | 0.008     | 0.379  |
| A003023_01 |    | 0.195     | 0.211  | 0.178     | -0.104    | 0.078  | 0.054     | -0.261    | -0.152 |
| A003024_01 |    | 0.305     | 0.416  | -0.007    | -0.05     | 0.048  | -0.01     | -0.677    | -0.481 |
| A003029_01 |    | -0.217    | -0.058 | -0.248    | -0.207    | 0.066  | 0.368     | -0.183    | 0.085  |
| A003034_01 | NA | NA        |        | -0.164    | -0.073 NA |        | -0.01     | -0.563 NA |        |
| A003036_01 |    | -0.017    | 0.284  | 0.184     | 0.402     | -0.372 | -0.328    | -0.207    | -0.032 |
| A003037_01 |    | -0.044 NA |        | -0.276    | 0.01      | 0.401  | 0.653 NA  |           | 0.376  |
| A003039_01 |    | 0.482     | 0.891  | 0.142     | 0.184 NA  |        | -0.101 NA |           | 0.137  |
| A003042_01 |    | -0.041    | 0      | 0.176     | -0.07     | 0.08   | 0.05      | -0.041    | 0.209  |
| A003045_01 |    | -0.307    | -0.024 | -0.378    | -0.327    | -0.183 | -0.276    | 0.04      | 0.161  |
| A003050_01 |    | 0.04 NA   |        | -0.057    | -0.009    | 0.026  | 0.007     | 0.127     | 0.201  |

|            |           |           |        |           |        |           |          |        |
|------------|-----------|-----------|--------|-----------|--------|-----------|----------|--------|
| A003054_01 | 0.035     | -0.047    | -0.289 | -0.056    | -0.074 | 0.08      | 0.052    | 0.046  |
| A003055_01 | -0.286    | -0.393    | 0.162  | 0.257     | 0.155  | 0.146     | 0.056    | 0.054  |
| A003056_01 | -0.009    | -0.153    | -0.331 | -0.196    | -0.131 | -0.197    | 0.398    | 0.403  |
| A003058_01 | 0.152     | 0.085     | -0.173 | -0.314    | -0.024 | -0.197    | -0.077   | 0.115  |
| A003059_01 | -0.596    | -0.237    | 0.139  | 0.004     | 0.346  | 0.438     | -0.152   | 0.136  |
| A003060_01 | -0.313 NA |           | 0.888  | 1.026     | 0.554  | 0.817     | -0.233   | -0.284 |
| A003070_01 | -1.581    | -1.347 NA | NA     |           | 0.98   | 1.339 NA  | NA       |        |
| A003078_01 | -0.13     | -0.024    | -0.095 | -0.01     | -0.573 | -0.571    | -0.299   | 0.372  |
| A003079_01 | -0.038    | -0.022    | -0.258 | -0.145    | -0.077 | -0.022    | -0.004   | 0.172  |
| A003084_01 | -0.147    | 0.03      | -1.029 | -0.521    | -0.636 | -0.743    | 0.061    | 0.132  |
| A003092_01 | 0.002 NA  | NA        |        | -0.396 NA |        | 0.109 NA  | NA       |        |
| A003101_01 | -1.216    | -0.852    | 0.54   | 0.63      | 0.85   | 1.106     | 0.149    | 0.115  |
| A003106_01 | -0.121    | 0.138     | 0.019  | -0.054    | 0.071  | 0.276     | -0.14    | 0.026  |
| A003107_01 | -0.806 NA |           | 0.347  | 0.399     | 0.353  | 0.503 NA  |          | -0.262 |
| A003109_01 | 0.384     | 0.41      | -0.061 | -0.052    | 0.084  | -0.099    | -0.452   | -0.386 |
| A003110_01 | 0.277     | 0.439     | 0.016  | 0.071     | 0.251  | 0.275 NA  | NA       |        |
| A003112_01 | -0.177    | -0.102    | -0.151 | -0.089    | 0.02   | 0.265     | 0.164    | 0.305  |
| A003113_01 | 0.04 NA   |           | -0.176 | 0.088     | 0.083  | 0.09 NA   | NA       |        |
| A003114_01 | 0.274     | 0.038     | 0.426  | 0.471     | 0.395  | 0.33      | -0.228   | -0.365 |
| A003117_01 | 0.098     | 0.025     | -0.031 | -0.191    | 0.295  | 0.285     | 0.241    | 0.207  |
| A003121_01 | 0.283     | 0.108     | -0.27  | -0.154    | -0.146 | -0.34     | -0.109   | -0.263 |
| A003124_01 | -0.086 NA | NA        |        | -0.315 NA | NA     | NA        |          | 0.167  |
| A003130_01 | -0.089 NA |           | 0.024  | -0.102 NA | NA     |           | -0.162   | 0.079  |
| A003131_01 | -0.09 NA  |           | 0.098  | 0.221 NA  | NA     | NA        |          | 0.022  |
| A003134_01 | -0.124    | -0.128    | -0.435 | -0.375    | 0.292  | 0.298     | 0.152    | 0.285  |
| A003137_01 | -0.033    | 0.021     | 0.042  | 0.231     | -0.147 | -0.037    | -0.19    | 0.058  |
| A003138_01 | -0.219    | -0.14     | 0.295  | 0.344     | -0.872 | -0.928    | -0.482   | -0.548 |
| A003141_01 | -0.06     | 0.017     | 0.046  | 0.182     | 0.536  | 0.821     | 0.215    | 0.303  |
| A003148_01 | -0.25 NA  | NA        | NA     |           | 0.492  | 0.525 NA  |          | 0.077  |
| A003154_01 | -0.299 NA |           | 0.312  | 0.138     | -0.645 | -0.704 NA |          | -0.54  |
| A003164_01 | NA        | 0.289     | 0.062  | 0.069     | 0.135  | 0.204     | 0.213    | 0.379  |
| A003170_01 | -0.11     | 0.038     | -0.092 | 0.029     | -0.033 | 0.199 NA  | NA       |        |
| A003174_01 | 0.279     | 0.244     | -0.156 | 0.044     | -0.421 | -0.462    | 0.062    | 0.04   |
| A003181_01 | -0.221    | -0.212    | 0.145  | 0.168     | -0.55  | -0.714 NA | NA       |        |
| A003184_01 | 0.117     | 0.277     | 0.146  | 0.134     | -0.392 | -0.585    | -0.069   | 0.084  |
| A003186_01 | -0.139 NA |           | -0.257 | -0.198 NA |        | -1.195 NA | NA       |        |
| A003189_01 | -0.232    | -0.031    | -0.084 | 0.102     | -0.119 | -0.051    | 0.035    | 0.23   |
| A003190_01 | -0.212    | -0.022    | -0.046 | 0.066     | -0.061 | -0.108    | 0.065    | 0.153  |
| A003194_01 | -0.146    | -0.285    | -0.072 | -0.109    | -0.14  | 0.007     | 0.041 NA |        |
| A003197_01 | 0.182     | 0.08      | 0.037  | 0.208     | -0.149 | -0.245    | -0.002   | 0.029  |
| A003198_01 | -0.004    | 0.136     | -0.181 | -0.241    | -0.05  | -0.114    | 0.314    | 0.372  |
| A003199_01 | 0.197     | -0.022    | -0.036 | -0.054    | -0.114 | -0.334    | 0.141    | 0.016  |
| A003207_01 | -0.706    | -0.432    | 0.084  | 0.142     | 0.427  | 0.652     | -1.359   | -1.307 |
| A003208_01 | 0.09      | 0.222     | 0.095  | 0.113     | -0.052 | -0.122    | -0.005   | 0.126  |
| A003209_01 | 0.146     | 0.239     | -0.082 | 0.127 NA  |        | -0.076    | 0.061    | 0.238  |
| A003213_01 | 0.242 NA  |           | 0.006  | 0.181 NA  |        | 0.094 NA  | NA       |        |
| A003214_01 | -0.154    | -0.193    | -0.064 | 0.107     | -0.319 | -0.134    | -0.215   | -0.243 |
| A003217_01 | 0.416     | 0.418     | 0.141  | 0.106     | -0.053 | -0.177    | -0.074   | -0.02  |
| A003222_01 | -1.168 NA |           | 0.184  | 0.425 NA  |        | -0.944 NA |          | -0.67  |
| A003235_01 | -0.068    | 0.146     | 0.138  | 0.207     | -0.253 | -0.367    | -0.196   | -0.231 |
| A003237_01 | 0.341 NA  |           | 0.603  | 0.788 NA  |        | 0.4       | -0.725   | -0.615 |
| A003242_01 | -0.345    | -0.394    | -0.621 | -0.508    | 0.098  | 0.303     | 0.073    | -0.002 |
| A003245_01 | -0.183    | -0.042    | -0.382 | -0.308    | 0.121  | 0.098     | 0.322    | 0.279  |
| A003250_01 | -0.053    | 0.07      | 0.014  | 0.163     | -0.423 | -0.51 NA  |          | -0.545 |
| A003252_01 | -0.078    | -0.091    | -0.149 | -0.055    | 0.053  | 0.084     | 0.079    | -0.007 |
| A003263_01 | 0.004     | -0.119    | 0.153  | 0.147     | -0.148 | -0.257    | -0.331   | -0.277 |
| A003264_01 | 0.288     | 0.15      | 0.104  | 0.046     | 0.071  | -0.058    | -0.004   | 0.033  |
| A003266_01 | 0.299     | 0.166     | -0.653 | -0.527    | 0.122  | 0.136 NA  |          | -0.119 |
| A003274_01 | -0.003    | -0.141    | -0.09  | 0.068     | -0.362 | -0.243    | 0.105    | 0.144  |
| A003276_01 | -0.133    | -0.04     | 0.217  | 0.149     | -0.085 | -0.242    | -0.2     | -0.298 |
| A003277_01 | -0.098    | -0.143    | 0.077  | 0.043 NA  |        | 0.011     | 0.128    | 0.002  |
| A003278_01 | 0.21      | 0.167     | 0.012  | 0.225     | -0.161 | -0.155    | 0.427    | 0.316  |
| A003280_01 | 0.018     | 0.239     | 0.159  | -0.023    | -0.134 | -0.2 NA   |          | 0.176  |
| A003286_01 | -0.158 NA |           | -0.195 | -0.013    | 0.507  | 0.74      | 0.355    | 0.154  |
| A003287_01 | 0.378     | 0.489     | 0.257  | 0.23      | 0.269  | 0.293     | 0.08     | 0.186  |
| A003291_01 | 0.033     | 0.136     | 0.414  | 0.3       | -0.748 | -0.97     | -0.188   | -0.279 |
| A003294_01 | -0.26     | -0.176    | 0.54   | 0.604     | -0.613 | -0.775    | -0.508   | -0.548 |
| A003299_01 | 0.262     | 0.188     | -0.136 | -0.006    | 0.164  | 0.216     | 0.131    | 0.135  |

|            |        |        |        |        |        |        |        |        |
|------------|--------|--------|--------|--------|--------|--------|--------|--------|
| A003304_01 | -0.008 | NA     | -0.083 | -0.045 | NA     | NA     | -0.002 | 0.078  |
| A003311_01 | -0.008 | NA     | 0.03   | -0.117 | NA     | -0.414 | -0.041 | -0.068 |
| A003317_01 | -0.05  | NA     | 0.329  | 0.122  | NA     | 0.515  | NA     | 0.143  |
| A003329_01 | -0.129 | 0.129  | -0.105 | 0.258  | 0.332  | 0.465  | -0.049 | 0.065  |
| A003333_01 | -0.197 | -0.069 | -0.409 | -0.032 | -0.306 | -0.258 | NA     | -0.02  |
| A003337_01 | -0.611 | -0.509 | 0.421  | 0.422  | 1.02   | 1.417  | 0.44   | 0.593  |
| A003339_01 | -0.097 | NA     | 0.108  | -0.049 | -0.078 | -0.095 | 0.045  | 0.012  |
| A003351_01 | -0.086 | 0.146  | -0.1   | 0.084  | -0.001 | 0.144  | -0.205 | -0.075 |
| A003354_01 | -0.338 | -0.264 | -0.151 | -0.058 | -0.698 | -0.921 | -0.012 | -0.117 |
| A003359_01 | -0.308 | NA     | 0.028  | 0.143  | -1.118 | -1.026 | NA     | NA     |
| A003360_01 | -0.313 | -0.21  | 0.237  | 0.205  | -1.121 | -1.161 | -0.636 | -0.555 |
| A003365_01 | -0.328 | -0.141 | -0.387 | -0.476 | 0.068  | 0.179  | -0.124 | 0.032  |
| A003366_01 | -0.122 | -0.243 | -0.3   | -0.359 | NA     | -0.227 | -0.01  | 0.082  |
| A003367_01 | -0.48  | -0.383 | -0.095 | -0.08  | -0.316 | -0.244 | -0.105 | -0.001 |
| A003370_01 | 0.006  | -0.031 | -0.027 | -0.056 | -0.014 | -0.012 | 0.002  | -0.096 |
| A003371_01 | -0.138 | 0.165  | 0.051  | 0.082  | -0.08  | 0.079  | 0.027  | 0.248  |
| A003373_01 | 0.045  | NA     | 0.152  | 0.185  | -0.679 | -0.611 | 0.054  | 0.189  |
| A003377_01 | -0.272 | -0.164 | -0.234 | -0.183 | -0.047 | 0.066  | -0.207 | -0.037 |
| A003381_01 | 0.058  | NA     | -0.001 | 0.028  | NA     | 0.226  | NA     | 0.121  |
| A003382_01 | 0.066  | 0.135  | -0.043 | 0.088  | 0.067  | 0.194  | -0.141 | 0.049  |
| A003383_01 | -0.041 | 0.106  | 0.105  | 0.235  | -0.008 | 0.031  | 0.058  | 0.257  |
| A003385_01 | -0.638 | NA     | -0.028 | -0.084 | -0.764 | -0.773 | -0.728 | -0.671 |
| A003387_01 | -0.042 | -0.037 | 0.004  | 0.121  | -0.127 | -0.144 | 0.061  | 0.025  |
| A003388_01 | 0.124  | 0.039  | -0.134 | -0.268 | 0.177  | -0.049 | 0.224  | 0.082  |
| A003389_01 | -0.394 | -0.231 | 0.309  | 0.092  | -1.742 | -1.986 | -0.424 | -0.287 |
| A003393_01 | -0.091 | 0.131  | -0.004 | -0.005 | 0.062  | 0.115  | -0.091 | -0.009 |
| A003394_01 | 0.084  | 0.09   | 0.344  | 0.353  | -0.145 | -0.177 | -0.256 | -0.269 |
| A003395_01 | -0.04  | -0.013 | 0.142  | 0.188  | 0.653  | 0.838  | -0.022 | 0.005  |
| A003398_01 | 0.063  | 0.031  | -0.26  | -0.249 | 0.144  | 0.281  | 0.141  | 0.1    |
| A003404_01 | 0.266  | NA     | -0.004 | 0.129  | NA     | NA     | 0.173  | -0.002 |
| A003405_01 | 0.102  | NA     | -0.105 | -0.053 | NA     | 0.419  | -0.09  | 0      |
| A003406_01 | 0.1    | 0.048  | -0.146 | -0.065 | 0.308  | 0.21   | 0.087  | -0.061 |
| A003408_01 | -0.309 | -0.206 | -0.088 | -0.115 | 0.092  | 0.137  | NA     | NA     |
| A003409_01 | -0.29  | -0.353 | 0.062  | 0.016  | -0.026 | 0      | 0.086  | 0.044  |
| A003410_01 | 0.038  | 0.078  | 0.123  | 0.149  | -0.081 | 0.033  | -0.178 | -0.204 |
| A003411_01 | 0.095  | 0.245  | -0.121 | -0.122 | -0.537 | -0.667 | -0.448 | -0.404 |
| A003412_01 | 0.376  | 0.321  | -0.251 | -0.291 | -0.576 | -0.803 | -0.443 | -0.53  |
| A003418_01 | -0.337 | -0.388 | -0.098 | -0.244 | 0.306  | 0.431  | 0.414  | 0.569  |
| A003419_01 | -0.399 | -0.273 | -0.171 | -0.236 | 0.2    | 0.292  | 0.366  | 0.421  |
| A003423_01 | -1.486 | -1.469 | 0.903  | 0.767  | 1.596  | 2.043  | 1.066  | 1.118  |
| A003425_01 | 0.25   | 0.24   | -0.034 | -0.097 | 0.154  | -0.03  | -0.067 | -0.074 |
| A003428_01 | -0.147 | NA     | -0.273 | 0.08   | 0.228  | 0.536  | NA     | NA     |
| A003431_01 | 0.656  | 0.45   | -0.348 | -0.016 | 0.472  | 0.444  | 0.573  | 0.417  |
| A003433_01 | 0.244  | 0.206  | -0.216 | -0.211 | -0.093 | 0.065  | 0.128  | 0.315  |
| A003434_01 | 0.183  | 0.167  | -0.24  | -0.212 | 0.318  | 0.358  | 0.268  | 0.304  |
| A003440_01 | 0.133  | 0.144  | -0.184 | 0.019  | 0.03   | 0.078  | -0.074 | -0.059 |
| A003443_01 | NA     | NA     | 0.298  | 0.188  | NA     | 0.209  | NA     | NA     |
| A003444_01 | 0.004  | NA     | -0.436 | -0.313 | 0.041  | 0.071  | NA     | 0.232  |
| A003446_01 | 0.159  | 0.232  | -0.279 | -0.148 | -0.066 | 0.059  | -0.12  | 0.009  |
| A003448_01 | 0.201  | NA     | -0.004 | -0.121 | NA     | NA     | 0.194  | 0.074  |
| A003456_01 | 0.062  | NA     | -0.175 | -0.111 | NA     | NA     | NA     | 0.173  |
| A003458_01 | 0.053  | 0.071  | -0.139 | 0.057  | 0.333  | 0.45   | -0.085 | 0.124  |
| A003460_01 | 0.143  | 0.078  | 0.276  | 0.174  | -0.22  | -0.444 | -0.09  | -0.032 |
| A003465_01 | 0.23   | NA     | -0.17  | 0.289  | 0.093  | 0.129  | NA     | NA     |
| A003467_01 | 0.148  | 0.213  | -0.237 | -0.113 | -0.496 | -0.675 | NA     | NA     |
| A003468_01 | 0.072  | 0.042  | -0.013 | -0.125 | 0.197  | 0.09   | 0.084  | 0.024  |
| A003470_01 | 0.147  | NA     | -0.18  | -0.086 | 0.225  | 0.438  | -0.074 | 0.092  |
| A003471_01 | -0.166 | NA     | NA     | -0.061 | 0.027  | 0.024  | NA     | NA     |
| A003472_01 | -0.139 | -0.114 | 0.021  | 0.02   | 0.072  | -0.014 | -0.049 | -0.071 |
| A003475_01 | -0.07  | 0.118  | -0.678 | -0.395 | 0.276  | 0.472  | 0.069  | 0.229  |
| A003478_01 | 0.148  | 0.273  | -0.027 | -0.069 | 0.114  | 0.232  | -0.016 | 0.351  |
| A003480_01 | 0.563  | 0.698  | 0.345  | 0.182  | 0.691  | 0.745  | NA     | -0.082 |
| A003483_01 | 0.004  | 0.022  | -0.051 | -0.088 | 0.04   | -0.091 | -0.035 | -0.013 |
| A003486_01 | -0.389 | NA     | -0.183 | -0.048 | -0.245 | -0.299 | NA     | 0.082  |
| A003488_01 | 0.089  | 0.124  | 0.057  | 0.086  | 0.256  | 0.206  | 0.107  | 0.221  |
| A003493_01 | 0.241  | NA     | -0.408 | -0.078 | 0.221  | 0.362  | 0.149  | -0.007 |
| A003497_01 | 0.031  | 0.158  | -0.078 | 0.107  | 0.377  | 0.58   | 0.219  | 0.328  |
| A003500_01 | 0.134  | 0.054  | -0.19  | 0.006  | -0.164 | -0.092 | -0.385 | NA     |

|            |    |           |        |           |           |          |           |           |        |
|------------|----|-----------|--------|-----------|-----------|----------|-----------|-----------|--------|
| A003501_01 |    | 0.145     | 0.073  | -0.046    | -0.085    | 0.129    | 0.086     | -0.06     | 0.034  |
| A003503_01 |    | 0.004     | -0.065 | -0.017    | 0.004     | 0.453    | 0.523     | 0.338     | 0.323  |
| A003510_01 |    | 0.288     | 0.383  | -0.359    | -0.298    | -0.3     | -0.566    | 0.074     | -0.01  |
| A003512_01 |    | -0.045    | 0.198  | 0.246     | 0.166     | -0.181   | -0.079    | -0.176    | 0.009  |
| A003513_01 |    | -0.092    | -0.002 | 0.159     | 0.096     | 0.087    | 0.164     | -0.367    | -0.172 |
| A003518_01 |    | 0.125     | 0.044  | 0.045     | 0.021     | 0.245    | 0.364     | -0.041    | -0.099 |
| A003522_01 |    | -0.07 NA  |        | -0.147    | -0.187 NA |          | -0.22 NA  |           | 0.249  |
| A003523_01 |    | -0.479    | -0.356 | -0.129    | -0.089    | -0.58    | -0.452    | -0.582 NA |        |
| A003528_01 |    | -0.12     | -0.035 | -0.131    | -0.148    | 0.373    | 0.501     | -0.04     | 0.047  |
| A003530_01 |    | 0.197     | 0.255  | -0.191    | 0.085     | -0.004   | 0.21      | -0.072    | 0.061  |
| A003533_01 |    | -0.123    | -0.182 | 0.067     | 0.134     | 0.134    | 0.318     | 0.146     | 0.236  |
| A003535_01 |    | 0.089     | -0.104 | -0.813    | -0.438    | -0.137   | -0.103 NA |           | -0.09  |
| A003536_01 |    | 0.145     | 0.429  | -0.004    | 0.211     | 0.073    | 0.183 NA  | NA        |        |
| A003537_01 |    | -0.178    | 0      | -0.53     | -0.611    | 0.417    | 0.572     | 0.302     | 0.406  |
| A003538_01 |    | 0.399     | 0.192  | -0.137    | -0.021    | 0.178    | 0.085     | 0.07      | -0.011 |
| A003540_01 |    | 0.237     | 0.411  | 0.049     | 0.03      | 0.194    | 0.32      | -0.135    | 0.075  |
| A003544_01 | NA |           | 0.319  | 0.409     | 0.16 NA   |          | -0.006    | -0.095    | -0.135 |
| A003547_01 | NA | NA        |        | -0.165    | -0.079    | -0.801   | -0.846    | -0.1      | -0.066 |
| A003553_01 |    | 0.125     | 0.324  | 0.051     | 0.076     | 0.151    | 0.276     | -0.018    | 0.154  |
| A003554_01 |    | -0.101    | -0.239 | -0.078    | 0.168     | -0.666   | -0.836    | -0.095    | -0.058 |
| A003555_01 |    | 0.267     | 0.529  | -0.369    | 0.017     | -0.391   | -0.445    | 0.424     | 0.539  |
| A003556_01 |    | 0.064     | 0.137  | 0.182     | 0.263     | 0.399    | 0.348     | 0.182     | 0.2    |
| A003560_01 |    | 0.329 NA  |        | -0.323 NA | NA        |          | 0.307 NA  | NA        |        |
| A003567_01 |    | -0.264    | -0.107 | -0.55     | -0.453    | -1.164   | -1.544    | -0.524 NA |        |
| A003574_01 |    | 0.075     | -0.173 | -0.417    | -0.568    | 0.017    | -0.29     | 0.341     | 0.225  |
| A003576_01 |    | -0.075    | -0.126 | -1.35     | -1.205    | 0.551    | 0.737     | -0.579    | -0.551 |
| A003588_01 |    | -0.415    | -0.221 | -0.279    | 0.091     | -0.474   | -0.424    | -0.123    | 0.036  |
| A003599_01 |    | -0.195 NA |        | -0.15     | -0.05     | 0.052    | 0.109 NA  |           | -0.007 |
| A003604_01 | NA |           | -0.034 | 0.166     | 0.023     | -0.077   | -0.074    | -0.198    | -0.144 |
| A003606_01 |    | 0.177 NA  |        | -0.341    | -0.1      | 0.072    | 0.244 NA  |           | 0.187  |
| A003607_01 |    | -0.019 NA |        | -0.076    | 0.139 NA  |          | -0.192 NA |           | -0.113 |
| A003608_01 |    | -0.228    | -0.123 | -0.066    | -0.083    | 0.026    | 0.133     | -0.041    | 0.182  |
| A003610_01 |    | -0.119    | 0.158  | 0.074     | 0.016     | 0.08     | 0.178     | 0.11      | 0.34   |
| A003614_01 |    | 0.106     | 0.176  | -0.251    | -0.207    | 0.19     | 0.177     | 0.113     | 0.14   |
| A003617_01 |    | -0.413 NA |        | 0.127     | 0.182     | 0.065    | 0.039 NA  |           | -0.101 |
| A003621_01 | NA |           | 0.195  | -0.017    | -0.105    | -0.183   | -0.257 NA | NA        |        |
| A003628_01 |    | 0.034 NA  |        | -0.005    | -0.074 NA | NA       | NA        |           | 0.162  |
| A003630_01 |    | -0.447 NA |        | -0.39 NA  | NA        | NA       | NA        |           | 0.105  |
| A003633_01 | NA |           | 0.133  | 0.037     | 0.107     | 0.473    | 0.725     | 0.294     | 0.372  |
| A003636_01 |    | 0.212 NA  |        | -0.159    | -0.116    | 0.064    | 0.067     | 0.198     | 0.148  |
| A003637_01 |    | -0.936    | -0.903 | -0.257    | -0.415    | -1.081   | -1.098    | -0.528    | -0.342 |
| A003641_01 |    | -0.132    | 0.139  | 0.266     | 0.103     | 0.511    | 0.746     | 0.304     | 0.65   |
| A003643_01 |    | 0.222 NA  |        | -0.037    | -0.043 NA |          | 0.015     | 0.267     | 0.131  |
| A003647_01 |    | -1.989 NA |        | -0.54     | -0.147    | -2.072   | -2.227 NA |           | -1.78  |
| A003648_01 |    | 0.046 NA  |        | -0.167    | 0.159 NA  |          | -0.204 NA |           | -0.024 |
| A003653_01 |    | -0.082    | 0.073  | -0.121    | 0.133     | -0.329   | -0.089    | -0.311    | 0.066  |
| A003655_01 |    | -0.082    | -0.136 | -0.422    | -0.238    | -0.223   | -0.249    | 0.132     | 0.16   |
| A003656_01 |    | -0.183    | -0.177 | -0.305    | -0.156    | -1.02    | -0.883    | 0.153     | -0.005 |
| A003657_01 | NA | NA        |        | -0.113    | -0.182 NA |          | 0.158 NA  | NA        |        |
| A003660_01 |    | -0.488    | -0.098 | -0.252    | -0.248    | -0.817   | -0.696    | -0.28     | -0.075 |
| A003664_01 |    | 0.019     | -0.138 | -0.286    | -0.037    | 0.138    | 0.059     | 0.178     | -0.116 |
| A003665_01 |    | -0.18 NA  |        | -0.175    | -0.117    | 0.02     | 0.022     | 0.075     | 0.194  |
| A003667_01 |    | -0.374 NA |        | -0.826    | -0.287 NA |          | -0.208    | 0.29      | 0.421  |
| A003668_01 |    | 0.067     | 0.191  | 0.08      | -0.237    | 0.247    | 0.18      | 0.217     | 0.456  |
| A003671_01 | NA | NA        |        | -0.157    | 0.124 NA  |          | 0.292     | 0.237     | 0.21   |
| A003672_01 |    | -0.193    | 0.081  | 0.187     | 0.383     | 0.071    | 0.301     | -0.336    | -0.117 |
| A003673_01 |    | -0.39     | -0.214 | 0.088     | 0.05      | -0.417   | -0.375 NA |           | -0.072 |
| A003675_01 |    | 0.248     | 0.665  | 0.414     | 0.222     | 0.264    | 0.114     | 0.137     | 0.219  |
| A003676_01 |    | -0.139 NA |        | -0.034 NA |           | 0.105 NA | NA        |           | 0.244  |
| A003678_01 |    | 0.299     | 0.145  | 0.073     | 0.036     | 0.151    | -0.014    | 0.045     | -0.15  |
| A003679_01 |    | 0.048     | -0.087 | 0.137     | -0.2      | -0.235   | -0.453    | -0.124    | -0.069 |
| A003681_01 |    | -0.399    | -0.181 | 0.212     | 0.313     | -0.059   | 0.226     | 0.069     | 0.096  |
| A003689_01 |    | -0.052    | -0.05  | 0.18      | 0.189     | -0.313   | -0.408    | 0.013     | -0.061 |
| A003690_01 |    | -0.664 NA |        | 0.268     | 0.382     | -0.646   | -0.444 NA |           | -0.083 |
| A003691_01 |    | -0.234    | -0.059 | -0.475    | -0.151    | 0.281    | 0.79 NA   |           | 0.462  |
| A003694_01 |    | -0.262    | -0.328 | -0.088    | 0.023     | -0.923   | -1.002    | -0.288    | -0.216 |
| A003695_01 |    | 0.246 NA  |        | -0.645    | -0.595 NA | NA       |           | 0.516     | 0.428  |
| A003696_01 |    | -0.051    | 0.043  | -0.114    | -0.005    | 0.33     | 0.373     | 0.258     | 0.228  |

|            |           |           |           |           |        |           |        |        |
|------------|-----------|-----------|-----------|-----------|--------|-----------|--------|--------|
| A003698_01 | -0.532 NA |           | -0.322    | -0.276 NA |        | -0.98 NA  |        | -0.208 |
| A003703_01 | -0.308    | -0.239    | 0.14      | 0.212     | 0.503  | 0.842     | 0.432  | 0.462  |
| A003706_01 | -0.126 NA |           | -0.242 NA |           | 0.044  | 0.244 NA  | NA     |        |
| A003710_01 | 0.017     | 0.082     | 0.2       | 0.236     | -0.214 | -0.272    | -0.131 | -0.168 |
| A003714_01 | 0.393 NA  |           | -0.163    | 0.209 NA  |        | -0.093    | 0.09   | 0.005  |
| A003716_01 | 0.257     | 0.235     | 0.307     | 0.354 NA  |        | -1.505 NA | NA     |        |
| A003719_01 | 0.291 NA  |           | -0.393    | -0.195    | 0.263  | 0.443     | 0.496  | 0.486  |
| A003720_01 | 0.425     | 0.183     | 0.376     | 0.418     | 0.346  | 0.387     | 0.096  | -0.081 |
| A003732_01 | -0.18 NA  |           | -0.305    | -0.332    | -0.162 | 0.049     | -0.519 | -0.243 |
| A003736_01 | 0.329 NA  |           | -0.092    | -0.151 NA |        | -0.336    | -0.094 | 0.086  |
| A003737_01 | -0.45 NA  |           | -0.74     | -0.594    | 0.248  | 0.601     | -0.201 | -0.043 |
| A003743_01 | -0.078    | 0.302     | 0.09      | 0.002     | 0.107  | 0.153 NA  |        | 0.175  |
| A003744_01 | 0.16      | 0.059     | -0.002    | 0.144     | 0.118  | 0.091 NA  |        | 0.078  |
| A003750_01 | -0.265    | -0.006    | -0.494    | -0.248    | 0.028  | 0.435     | -0.163 | 0.007  |
| A003753_01 | -0.056 NA |           | -0.027    | -0.084    | 0.103  | 0.074     | 0.096  | 0.113  |
| A003754_01 | -0.361 NA |           | -0.237    | -0.224    | -0.203 | -0.069    | -0.062 | 0.199  |
| A003755_01 | 0.086     | 0.127     | -0.123    | 0.075     | -0.102 | 0.013     | -0.11  | 0.016  |
| A003756_01 | 0.08 NA   |           | -0.095    | -0.16 NA  |        | 0.141 NA  |        | 0.203  |
| A003762_01 | 0.099     | -0.044    | -0.252    | -0.171    | -0.436 | -0.631    | 0.145  | -0.085 |
| A003767_01 | -0.197    | 0.002     | -0.269    | -0.276    | 0.011  | 0.106 NA  |        | 0.076  |
| A003773_01 | 0.133     | -0.061    | -0.105    | 0.024     | 0.065  | 0.119     | 0.083  | -0.08  |
| A003775_01 | -0.103    | -0.133    | -0.578    | -0.303    | -0.204 | -0.183    | 0.001  | 0.041  |
| A003789_01 | 0.281     | 0.168     | -0.455    | -0.399    | 0.018  | 0.008     | 0.294  | 0.318  |
| A003800_01 | -0.44     | -0.347    | -0.09     | -0.019 NA |        | -1.255    | 0.065  | 0.112  |
| A003802_01 | -0.067 NA |           | -0.317    | -0.048    | 0.103  | 0.057     | 0.205  | 0.1    |
| A003803_01 | 0.187     | 0.389     | -0.187    | -0.054    | -0.043 | 0.008     | -0.04  | 0.286  |
| A003804_01 | 0.28      | 0.44      | 0.348     | 0.461     | 1.074  | 1.282     | 0.635  | 0.981  |
| A003808_01 | 0.155     | 0.111     | 0.37      | 0.405     | -0.325 | -0.307    | 0.187  | 0.291  |
| A003809_01 | -0.058    | -0.048    | -0.245    | -0.044    | -0.162 | -0.23 NA  | NA     |        |
| A003817_01 | -0.535    | -0.606 NA | NA        |           | -0.37  | -0.837 NA | NA     |        |
| A003820_01 | -0.257    | -0.022    | 0.255     | 0.067     | 0.038  | 0.184 NA  |        | 0.183  |
| A003825_01 | 0.037     | 0.059     | -0.521    | -0.412    | -0.802 | -0.904    | -0.215 | -0.128 |
| A003826_01 | -0.02 NA  |           | -0.207    | -0.048 NA |        | 0.138 NA  |        | 0.043  |
| A003827_01 | -0.166 NA |           | -0.014    | 0.116     | 0.117  | 0.556     | -0.051 | 0.358  |
| A003829_01 | -0.061    | -0.032    | -0.142    | -0.243    | 0.196  | 0.511     | -0.051 | 0.103  |
| A003844_01 | -3.423    | -2.698    | -0.641    | -0.801    | -4.036 | -4.346    | -3.053 | -2.668 |
| A003846_01 | 0.037     | -0.008    | -0.165    | -0.016    | -0.377 | -0.321    | -0.192 | -0.015 |
| A003849_01 | 0.18 NA   |           | 0.078     | 0.328 NA  |        | -0.043    | -0.282 | -0.057 |
| A003851_01 | 0.169     | 0.48      | 0.268     | 0.298     | -0.028 | 0.052     | -0.384 | -0.208 |
| A003854_01 | 0.149     | 0.108     | 0.089     | 0.292     | 0.063  | -0.047    | -0.221 | -0.162 |
| A003860_01 | 0.004 NA  |           | -0.2      | -0.054 NA |        | -0.522 NA |        | -0.17  |
| A003861_01 | 0.156 NA  |           | -0.136    | -0.236    | 0.312  | 0.352     | 0.46   | 0.237  |
| A003863_01 | -0.174    | 0.013     | 0.144     | 0.156     | -0.565 | -0.389 NA | NA     |        |
| A003864_01 | 0.194 NA  |           | -0.024    | -0.021 NA |        | -0.188    | 0.094  | 0.103  |
| A003869_01 | 0.059     | 0.19      | 0.089     | 0.202     | 0.041  | 0.288     | -0.073 | -0.036 |
| A003872_01 | -0.234    | -0.357    | -0.178    | -0.147    | 0.721  | 0.95      | -0.359 | -0.351 |
| A003875_01 | -0.166    | 0.027     | -0.025    | 0.101     | 0.34   | 0.637     | -0.187 | 0.226  |
| A003876_01 | -0.092    | 0.045     | -0.134    | 0.042     | -0.005 | 0.215 NA  | NA     |        |
| A003885_01 | 0.001 NA  |           | 0.153     | -0.05     | -0.005 | -0.036    | 0.209  | 0.252  |
| A003889_01 | 0.34      | 0.48      | 0.505     | 0.422 NA  |        | -0.337    | -0.103 | -0.073 |
| A003898_01 | -0.021    | -0.018    | -0.3      | -0.17     | 0.022  | 0.044     | 0.079  | 0.053  |
| A003910_01 | 0.017     | 0.076     | 0.207     | 0.234     | -0.566 | -0.579    | 0.056  | -0.289 |
| A003914_01 | -0.139    | -0.066    | -0.228    | -0.138    | 0.079  | 0.247     | 0.104  | 0.134  |
| A003915_01 | -0.074    | 0.051     | 0.051     | -0.012    | 0.366  | 0.583     | 0.224  | 0.333  |
| A003921_01 | -0.41     | -0.111    | -0.207    | -0.019    | -0.742 | -0.548    | -0.485 | -0.282 |
| A003925_01 | 0.145     | 0.125     | -0.142    | 0.036     | 0.389  | 0.456     | -0.035 | 0.065  |
| A003926_01 | -0.04 NA  |           | -0.161    | 0.009     | -0.033 | 0.137     | -0.023 | 0.221  |
| A003932_01 | -0.662 NA |           | 0.024     | 0.186 NA  |        | 0.127 NA  |        | -0.244 |
| A003933_01 | 0.11      | 0.436     | -0.076    | -0.199    | 0.233  | 0.506     | -0.201 | 0.236  |
| A003940_01 | 0.232 NA  |           | -0.011 NA | NA        |        | 0.423 NA  | NA     |        |
| A003947_01 | -0.085    | -0.148    | -0.42 NA  |           | -0.066 | 0.134 NA  | NA     |        |
| A003948_01 | NA        | -0.306    | 0.263     | 0.079     | 0.049  | -0.058    | -0.031 | -0.016 |
| A003952_01 | -0.543 NA | NA        |           | 0.375 NA  |        | -0.26 NA  | NA     |        |
| A003958_01 | 0.118 NA  |           | -0.315    | -0.05     | 0.077  | 0.25 NA   | NA     |        |
| A003959_01 | 0.19      | 0.178     | -0.15     | -0.046    | 0.207  | 0.334     | -0.193 | -0.055 |
| A003960_01 | NA        | -0.357    | -1.171    | -0.945    | -0.227 | -0.055    | -0.136 | 0.06   |
| A003961_01 | -0.296 NA |           | -0.301 NA | NA        |        | -0.141 NA | NA     |        |
| A003965_01 | 0.402     | 0.299     | 0.011     | 0.032     | 0.267  | 0.282 NA  | NA     |        |

|            |    |           |        |           |           |        |           |        |        |
|------------|----|-----------|--------|-----------|-----------|--------|-----------|--------|--------|
| A003968_01 |    | -0.212    | -0.161 | -0.326    | -0.188    | 0.042  | 0.38      | -0.079 | -0.097 |
| A003969_01 |    | -0.376    | 0.048  | -0.221    | -0.107    | 0.624  | 1.051     | 0.042  | 0.277  |
| A003974_01 |    | -0.039 NA |        | -0.219    | -0.065    | 0.439  | 0.47      | 0.096  | 0.103  |
| A003979_01 |    | -0.226 NA |        | -0.26     | -0.101    | -0.419 | -0.567    | 0.056  | -0.017 |
| A003982_01 |    | -0.79 NA  |        | 0.023 NA  |           | 0.883  | 1.274     | 0.516  | 0.7    |
| A003984_01 |    | -0.183    | -0.115 | -0.202    | -0.286    | 0.145  | 0.25      | 0.094  | 0.242  |
| A003989_01 |    | 0.471     | 0.972  | -0.552    | -0.574    | 0.383  | 0.428     | 0.539  | 0.939  |
| A003991_01 |    | 0.303     | 0.065  | 0.075     | 0.144     | -0.112 | -0.22 NA  |        | 0.186  |
| A003997_01 |    | -1.146 NA |        | -0.424    | -0.212    | 0.736  | 1.065     | 0.455  | 0.518  |
| A004000_01 |    | -0.005    | -0.117 | -0.329    | -0.063    | 0.216  | 0.499     | 0.055  | 0.022  |
| A004003_01 |    | -0.209 NA |        | -0.054    | 0.214     | 0.498  | 0.76      | 0.005  | 0.043  |
| A004018_01 | NA |           | -0.109 | 0.287     | 0.208     | 0.768  | 0.75      | -0.095 | -0.091 |
| A004026_01 |    | -0.065    | 0.232  | -0.097    | 0.021     | -0.107 | -0.229    | -0.058 | 0.223  |
| A004038_01 |    | -0.428    | 0.078  | -0.421    | -0.336    | 0.236  | 0.652     | -0.111 | 0.561  |
| A004039_01 |    | 0.008     | 0.048  | -0.019    | -0.112    | 0.364  | 0.394     | -0.151 | -0.121 |
| A004044_01 |    | -0.102    | 0.153  | -0.138    | -0.258    | 0.145  | 0.168     | 0.072  | 0.417  |
| A004045_01 |    | -0.01     | -0.048 | -0.155    | -0.279    | 0.328  | 0.363     | 0.12   | 0.238  |
| A004048_01 | NA |           | 0.497  | 0.215     | -0.113    | 0.144  | -0.097    | 0.09   | 0.165  |
| A004058_01 |    | 0.235     | 0.115  | 0.203     | 0.254     | 0.253  | 0.324     | 0.04   | -0.062 |
| A004098_01 |    | -0.062    | 0.075  | -0.159    | 0.188     | -0.075 | -0.124 NA |        | 0.118  |
| A004103_01 |    | -0.118    | -0.035 | -0.104    | 0.1       | -0.06  | 0.062 NA  |        | 0.033  |
| A004107_01 |    | 0.438     | 0.846  | 0.693     | 0.608     | -0.014 | -0.103 NA | NA     |        |
| A004121_01 |    | -0.636    | -0.228 | -0.254    | -0.271    | -0.632 | -0.437    | -0.381 | -0.197 |
| A004122_01 |    | -0.213    | -0.136 | 0.065     | 0.157     | 0.101  | 0.203     | 0.094  | 0.215  |
| A004144_01 |    | 0.104     | -0.093 | -0.013    | -0.139    | 0.228  | 0.126     | -0.124 | -0.173 |
| A004145_01 |    | 0.009     | 0.316  | -0.371 NA |           | -0.079 | -0.1 NA   |        | 0.055  |
| A004150_01 |    | 0.166     | -0.007 | 0.098     | 0.02      | -0.046 | 0.048     | 0.032  | 0.093  |
| A004151_01 |    | -0.004    | 0.351  | -0.738    | -0.246    | -0.168 | -0.088 NA |        | 0.249  |
| A004152_01 |    | 0.166     | 0.263  | -0.205    | -0.103    | -0.034 | -0.027    | -0.116 | -0.025 |
| A004157_01 |    | 0.088     | 0.021  | 0.101     | 0.228     | 0.255  | 0.149     | -0.185 | -0.248 |
| A004165_01 |    | 0.072     | 0      | -0.182    | -0.112    | 0.609  | 0.769     | 0.263  | 0.205  |
| A004173_01 |    | 0.038     | 0.064  | -0.263    | -0.274    | 0.155  | 0.227     | 0.008  | -0.078 |
| A004175_01 |    | 0.193 NA  |        | -0.176 NA |           | 0.199  | 0.382 NA  | NA     |        |
| A004177_01 |    | -0.084 NA |        | -0.289 NA | NA        |        | -0.56 NA  |        | 0.238  |
| A004181_01 |    | -0.545 NA |        | 1.347     | 1.15      | 1.254  | 1.603     | 0.238  | 0.201  |
| A004219_01 |    | -0.197    | -0.261 | -0.09     | 0.023     | 0.048  | 0.116     | 0.188  | 0.254  |
| A004221_01 |    | -0.046    | -0.079 | 0.024     | 0.241     | 0.382  | 0.5 NA    | NA     |        |
| A004223_01 |    | -0.064 NA |        | -0.496    | 0.019     | -1.38  | -1.265    | -0.032 | -0.01  |
| A004225_01 |    | -1.039    | -1.147 | 0.82      | 0.725     | 1.396  | 1.872     | 0.604  | 0.631  |
| A004236_01 |    | 0.137 NA  |        | 0.124     | 0.484 NA  |        | -0.159    | 0.185  | 0.307  |
| A004241_01 |    | -0.06 NA  |        | -0.169    | 0.05      | -0.021 | 0.032 NA  |        | -0.111 |
| A004242_01 |    | -0.014    | 0.027  | 0.009     | 0.199     | -0.909 | -0.845    | -0.186 | 0.091  |
| A004243_01 |    | 0.09      | 0.158  | -0.209    | -0.399    | 0.551  | 0.389     | 0.192  | 0.151  |
| A004244_01 |    | 0.227     | 0.229  | -0.087    | -0.049    | 0.155  | 0.362     | -0.102 | 0.069  |
| A004253_01 |    | 0.086 NA  |        | 0.018     | -0.063 NA | NA     | NA        |        | 0.009  |
| A004271_01 |    | -0.385    | -0.336 | -0.013    | 0.042     | -0.273 | -0.348    | -0.626 | -0.514 |
| A004272_01 |    | -0.051    | 0.104  | -0.193    | -0.063    | 0.47   | 0.711     | -0.095 | -0.082 |
| A004276_01 |    | 0.878     | 1.032  | -0.436    | -0.338    | 0.304  | 0.095     | -0.048 | 0.033  |
| A004281_01 |    | 0.25      | 0.286  | 0.349     | 0.186     | 0.021  | -0.05     | -0.456 | -0.451 |
| A004284_01 |    | -1.273    | -1.246 | -0.499    | -0.519 NA | NA     |           | -1.168 | -1.322 |
| A004285_01 |    | -0.34     | -0.402 | -0.721    | -0.665    | 0.024  | 0.228     | -0.3   | -0.072 |
| A004288_01 |    | -0.083 NA |        | -0.117    | -0.287    | 0.056  | -0.057 NA |        | -0.028 |
| A004289_01 |    | 0.191     | 0.44   | 0.14      | 0.456     | 0.558  | 0.624     | -0.145 | -0.01  |
| A004290_01 |    | 0.053     | -0.142 | -0.315    | -0.334    | 0.065  | 0.079     | 0.155  | -0.04  |
| A004300_01 |    | 0.227     | 0.138  | 0.209     | 0.136     | -0.221 | -0.426    | -0.194 | -0.175 |
| A004305_01 |    | -0.012    | 0.151  | -0.038    | -0.206    | 0.086  | 0.264     | 0.029  | 0.161  |
| A004306_01 |    | 0.284 NA  | NA     |           | -0.529    | 0.606  | 0.553 NA  |        | 0.197  |
| A004311_01 |    | 0.179 NA  |        | -0.283    | -0.052 NA | NA     |           | -0.107 | 0.074  |
| A004313_01 |    | -0.267    | -0.338 | 0.458     | 0.354     | 0.771  | 0.717     | 0.228  | 0.131  |
| A004314_01 |    | -0.574    | -0.42  | -1.484    | -1.298    | 0.242  | 0.64      | 0.089  | 0.462  |
| A004319_01 |    | -0.112    | -0.069 | -0.141    | 0.091     | -0.262 | -0.381    | 0.061  | 0.065  |
| A004320_01 |    | -0.997    | -0.788 | -2.094    | -1.759    | -2.622 | -3.116    | -1.585 | -1.862 |
| A004325_01 |    | 0.149     | 0.027  | 0.16      | 0.203     | -0.319 | -0.504    | 0.043  | -0.173 |
| A004335_01 |    | -0.367 NA |        | -0.173    | -0.066 NA | NA     | NA        |        | -0.079 |
| A004343_01 |    | -0.023 NA |        | -0.119    | -0.152    | -0.138 | -0.194    | 0.1    | 0.125  |
| A004347_01 |    | 0.021     | 0.071  | 0.162     | 0.156     | -0.181 | -0.229    | 0.06   | -0.057 |
| A004349_01 |    | 0.105     | 0.155  | 0.219     | 0.021     | -0.077 | -0.063    | -0.041 | 0.146  |
| A004350_01 |    | 0.427     | 0.608  | -0.244    | -0.48     | 0.534  | 0.61      | -0.205 | 0.14   |

|            |    |           |           |          |  |           |  |        |  |           |  |        |
|------------|----|-----------|-----------|----------|--|-----------|--|--------|--|-----------|--|--------|
| A004359_01 |    | 0.079 NA  |           | -0.005   |  | -0.015 NA |  | NA     |  | 0.041     |  | 0.23   |
| A004362_01 |    | 0.144 NA  |           | -0.28 NA |  |           |  | -0.025 |  | -0.024 NA |  | NA     |
| A004378_01 |    | 0.122 NA  |           | -0.03    |  | 0.036     |  | 0.182  |  | 0.147     |  | 0.013  |
| A004382_01 |    | 0.138 NA  |           | -0.209   |  | -0.198    |  | -0.127 |  | 0.026 NA  |  | 0.244  |
| A004383_01 |    | -0.052    | 0.213     | -0.011   |  | 0.071     |  | -0.02  |  | 0.124     |  | -0.248 |
| A004386_01 |    | 0.157     | 0.198     | 0.203    |  | 0.199     |  | 0.308  |  | 0.345     |  | -0.112 |
| A004392_01 |    | -0.057 NA |           | 0.015    |  | 0.026 NA  |  |        |  | -0.059 NA |  | NA     |
| A004393_01 |    | 0.277     | 0.049     | -0.017   |  | -0.086    |  | 0.436  |  | 0.495     |  | 0.203  |
| A004396_01 |    | -0.121    | -0.114    | 0.016    |  | -0.048    |  | 0.001  |  | -0.04     |  | 0.088  |
| A004397_01 |    | 0.249     | -0.07     | -0.189   |  | -0.145    |  | -0.04  |  | -0.035    |  | 0.177  |
| A004398_01 |    | 0.11      | 0.068     | 0.344    |  | 0.429     |  | -0.028 |  | -0.016    |  | -0.14  |
| A004404_01 |    | -0.4      | -0.293    | -0.864   |  | -0.586    |  | 0.239  |  | 0.735     |  | 0.224  |
| A004406_01 |    | -0.051 NA |           | 0.205    |  | 0.087     |  | 0.036  |  | 0.16 NA   |  | 0.146  |
| A004407_01 |    | -0.022    | 0.005     | 0.235    |  | 0.225     |  | -1.076 |  | -1.23     |  | -0.214 |
| A004408_01 |    | 0.944     | 0.957     | 0.128    |  | -0.048    |  | -0.985 |  | -1.096    |  | 0.285  |
| A004413_01 |    | 0.265     | 0.442     | 0.071    |  | 0.297     |  | 0.292  |  | 0.373     |  | -0.024 |
| A004417_01 |    | -0.441    | -0.325    | 0.006    |  | -0.261    |  | 0.499  |  | 0.434     |  | -0.234 |
| A004424_01 |    | 0.236 NA  |           | -0.051   |  | -0.059    |  | -0.245 |  | -0.39 NA  |  | -0.166 |
| A004425_01 |    | -0.057    | 0.062     | -0.264   |  | -0.26     |  | 0.144  |  | 0.163 NA  |  | NA     |
| A004426_01 |    | 0.034     | 0.147     | -0.082   |  | 0.046     |  | -0.072 |  | 0.079     |  | -0.069 |
| A004429_01 |    | 0.091     | 0.033     | -0.038   |  | -0.131    |  | 0.383  |  | 0.325     |  | -0.009 |
| A004431_01 |    | -0.794 NA |           | -0.811   |  | -0.707    |  | -0.313 |  | -0.394    |  | -0.661 |
| A004434_01 |    | 0.24      | 0.3       | 0.179    |  | 0.171     |  | -0.03  |  | -0.017    |  | -0.177 |
| A004437_01 |    | 0.221     | 0.62      | -0.547   |  | -0.53     |  | 0.42   |  | 0.483     |  | 0.185  |
| A004439_01 |    | 0.174     | -0.034    | -0.129   |  | 0.007     |  | -0.344 |  | -0.503    |  | -0.104 |
| A004442_01 |    | -0.547    | 0.1       | -0.305   |  | -0.351    |  | 0.461  |  | 1.113 NA  |  | 0.419  |
| A004448_01 |    | 0.231     | 0.098     | 0.67     |  | 0.512     |  | -0.031 |  | -0.15     |  | -0.198 |
| A004449_01 |    | 0.34 NA   |           | -0.052   |  | 0.03 NA   |  |        |  | -0.009    |  | 0.041  |
| A004451_01 |    | 0.024     | -0.004    | 0.111    |  | 0.025     |  | -0.392 |  | -0.597    |  | -0.079 |
| A004452_01 |    | 0.058 NA  |           | 0.023    |  | 0.352 NA  |  |        |  | -0.317    |  | -0.048 |
| A004454_01 |    | -0.01     | -0.083    | -0.212   |  | -0.105    |  | -1.014 |  | -0.921    |  | -0.203 |
| A004456_01 |    | -0.144    | -0.106    | -0.297   |  | -0.334    |  | 0.092  |  | 0.106     |  | 0.414  |
| A004458_01 |    | 0.281     | 0.194     | -0.139   |  | -0.2      |  | 0.792  |  | 0.901     |  | 0.238  |
| A004461_01 |    | -0.604    | -0.54     | -0.027   |  | -0.07     |  | 0.226  |  | 0.417     |  | -0.061 |
| A004462_01 |    | 0.092     | 0.072     | -0.058   |  | -0.01     |  | 0.096  |  | 0.118     |  | 0.295  |
| A004464_01 |    | 0.282     | 0.436     | 0.056    |  | 0.094     |  | -0.183 |  | -0.139    |  | 0.03   |
| A004466_01 |    | -0.166 NA |           | -0.16    |  | -0.133    |  | 0.046  |  | 0.215 NA  |  | 0.052  |
| A004467_01 |    | 0.046 NA  |           | -0.199   |  | -0.067 NA |  |        |  | -0.022    |  | 0.101  |
| A004468_01 |    | 0.13      | -0.103    | 0.15     |  | 0.131     |  | -0.146 |  | -0.649    |  | -0.124 |
| A004469_01 |    | -0.408    | -0.604 NA |          |  | -1.048    |  | -0.819 |  | -0.738 NA |  | NA     |
| A004470_01 |    | -0.389    | -0.344    | -0.166   |  | -0.003    |  | 0.396  |  | 0.657     |  | -0.08  |
| A004472_01 |    | 0.085 NA  |           | 0.213    |  | 0.045 NA  |  |        |  |           |  | -0.001 |
| A004474_01 | NA | NA        |           | -0.275   |  | -0.054 NA |  |        |  | 0.057     |  | 0.215  |
| A004481_01 |    | -0.011    | -0.05     | 0.004    |  | 0.118     |  | -0.301 |  | -0.261    |  | -0.227 |
| A004483_01 |    | -0.018    | 0.158     | 0.123    |  | 0.13      |  | 0.05   |  | 0.008     |  | -0.1   |
| A004484_01 |    | -0.169 NA |           | 0.047    |  | -0.008    |  | 0.315  |  | 0.698     |  | 0.302  |
| A004488_01 | NA | NA        |           | 0.061    |  | 0.076 NA  |  |        |  | -0.221 NA |  | NA     |
| A004489_01 |    | 0.489     | 0.412     | 0.077    |  | 0.104     |  | 0.153  |  | 0.223     |  | 0.083  |
| A004491_01 |    | -0.105    | 0.267     | -0.076   |  | -0.074    |  | 0.332  |  | 0.427     |  | 0.234  |
| A004493_01 |    | 0.058 NA  |           | 0.003    |  | -0.055 NA |  |        |  | 0.692     |  | 0.116  |
| A004494_01 |    | 0.117     | 0.222     | -0.12    |  | -0.187    |  | 0.175  |  | 0.098     |  | -0.021 |
| A004495_01 |    | 0.502     | 0.625     | 0.348    |  | 0.337     |  | 0.337  |  | 0.261     |  | 0.055  |
| A004497_01 |    | -0.201 NA |           | 0.202    |  | 0.091     |  | 0.056  |  | -0.085    |  | -0.304 |
| A004498_01 |    | -0.315    | 0.127     | -0.181   |  | -0.152    |  | 0.132  |  | 0.348     |  | -0.177 |
| A004502_01 |    | 0.555     | 0.48      | 0.2      |  | 0.18      |  | -0.563 |  | -0.792    |  | -0.181 |
| A004505_01 |    | -0.297    | -0.237    | -0.27    |  | -0.147    |  | -0.054 |  | -0.096    |  | 0.159  |
| A004509_01 |    | 0.175     | 0.204     | -0.034   |  | -0.044    |  | 0.128  |  | 0.057     |  | -0.052 |
| A004511_01 |    | 0.087     | 0.137     | -0.288   |  | -0.313    |  | 0.117  |  | 0.138     |  | -0.017 |
| A004514_01 |    | -0.091    | -0.212    | 0.191    |  | 0.359     |  | -0.179 |  | -0.062    |  | -0.269 |
| A004515_01 |    | -0.273 NA |           | 0.367    |  | 0.33 NA   |  |        |  | 0.018 NA  |  | -0.069 |
| A004519_01 |    | -0.022    | 0.393     | 0.354    |  | 0.191     |  | -0.274 |  | -0.212    |  | -0.163 |
| A004520_01 |    | 0.282     | 0.106     | 0.094    |  | 0.092     |  | -0.127 |  | -0.137    |  | -0.065 |
| A004522_01 |    | -0.036 NA |           | -0.211   |  | -0.042    |  | 0.073  |  | 0.202 NA  |  | 0.111  |
| A004523_01 |    | 0.239     | 0.008     | 0.106    |  | 0.049     |  | 0.097  |  | 0.009     |  | 0.03   |
| A004524_01 |    | 0.023     | 0.191     | -0.168   |  | -0.282    |  | 0.051  |  | 0.218 NA  |  | NA     |
| A004526_01 |    | -0.142    | -0.132    | -0.056   |  | -0.112    |  | -0.432 |  | -0.419    |  | -0.293 |
| A004527_01 |    | 0.271     | 0.357     | 0.382    |  | 0.251     |  | 0.144  |  | -0.044    |  | -0.15  |
| A004528_01 |    | 0.153     | 0.218     | -0.046   |  | -0.089    |  | -0.189 |  | -0.54     |  | -0.066 |

|            |    |           |           |        |           |        |           |           |        |
|------------|----|-----------|-----------|--------|-----------|--------|-----------|-----------|--------|
| A004534_01 |    | 0.256     | 0.079     | 0.153  | 0.229     | 0.195  | 0.176     | -0.029    | -0.16  |
| A004537_01 |    | -0.531    | -0.204    | -0.306 | -0.408    | 0.035  | 0.184     | -0.53     | -0.254 |
| A004541_01 |    | -0.085    | 0.294     | 0.178  | 0.16      | 0.174  | 0.18      | -0.182    | 0.064  |
| A004542_01 |    | 0.114     | 0.081     | -0.244 | 0.048     | -0.331 | -0.409    | -0.054    | -0.08  |
| A004545_01 |    | -0.123    | -0.08     | -0.016 | -0.012    | 0.563  | 0.829     | 0.205     | 0.207  |
| A004548_01 |    | 0.002     | 0         | -0.15  | 0.196     | -0.205 | -0.179    | 0.305     | 0.38   |
| A004549_01 |    | -0.206    | -0.186    | 0.088  | 0.121     | -0.14  | 0.016     | 0.062     | 0.129  |
| A004553_01 |    | -0.089    | 0.223     | -0.265 | -0.15     | -0.109 | -0.049    | -0.224    | 0.089  |
| A004557_01 |    | -0.516    | -0.363    | -0.003 | -0.033    | -0.196 | 0.009     | -0.242    | -0.014 |
| A004558_01 |    | -0.344    | -0.244    | -0.312 | -0.245    | -0.245 | -0.292    | 0.111     | 0.031  |
| A004559_01 |    | -0.128 NA |           | -0.117 | -0.009 NA |        | -0.233 NA |           | 0.03   |
| A004560_01 |    | -0.11     | -0.197    | -0.32  | -0.197 NA |        | -0.152    | -0.2      | -0.224 |
| A004576_01 |    | -0.064    | -0.125    | -0.144 | -0.259    | 0.07   | 0.075     | 0.009     | 0.024  |
| A004577_01 |    | 0.211     | 0.436     | 0.043  | 0.113     | 0.119  | 0.096 NA  | NA        |        |
| A004578_01 |    | -0.161 NA |           | -0.058 | -0.11 NA  | NA     | NA        |           | 0.26   |
| A004582_01 |    | -0.287    | -0.051    | 0.072  | 0.145     | -0.028 | 0.064     | -0.296    | -0.114 |
| A004587_01 |    | 0.492     | 0.419     | -0.218 | -0.118    | 0.249  | 0.382     | 0.24      | 0.343  |
| A004588_01 |    | 0.304     | 0.293     | -0.409 | -0.506    | 0.42   | 0.462     | 0.438     | 0.48   |
| A004593_01 |    | -0.231    | -0.204    | -0.289 | 0.003     | -0.258 | -0.141    | 0.005     | 0.157  |
| A004594_01 |    | 0.026     | -0.057    | 0.469  | 0.372     | 0.368  | 0.241     | -0.254    | -0.249 |
| A004596_01 |    | -0.036    | 0.131     | -0.224 | -0.04     | -0.023 | -0.204    | -0.066    | 0.024  |
| A004597_01 |    | 0.201     | 0.184     | 0.057  | 0.117     | 0.89   | 1.004     | 0.113     | 0.219  |
| A004598_01 |    | 0.067     | -0.043    | -0.327 | -0.004    | 0.085  | 0.271     | 0.069     | 0.103  |
| A004599_01 |    | 0.105 NA  |           | -0.044 | 0.033     | -0.469 | -0.542    | 0.015     | -0.12  |
| A004602_01 |    | 0.028     | -0.165    | 0.133  | 0.08      | -0.06  | -0.023    | 0.007     | -0.192 |
| A004603_01 |    | -0.078    | -0.099    | 0.008  | 0.269     | -0.085 | 0.209     | -0.179    | 0.034  |
| A004604_01 |    | -0.338 NA |           | -1.197 | -0.861    | 0.398  | 0.344 NA  |           | -0.67  |
| A004609_01 | NA |           | -0.111    | -0.185 | 0.007     | -0.331 | -0.148 NA |           | 0.177  |
| A004610_01 |    | 0.036     | 0.219     | 0.222  | 0.123     | -0.135 | -0.167    | -0.056    | -0.002 |
| A004612_01 |    | 0.398     | 0.723     | -0.44  | -0.423    | 0.164  | 0.403     | 0.01      | 0.562  |
| A004615_01 | NA | NA        |           | -0.179 | 0.148     | 0.056  | 0.037 NA  |           | 0.177  |
| A004616_01 |    | 0.108     | 0.122     | -0.135 | -0.053    | 0.243  | 0.237     | 0.303     | 0.221  |
| A004617_01 |    | 0.006     | 0.053     | -0.339 | -0.337    | -0.149 | -0.257    | 0.035     | 0.125  |
| A004618_01 |    | 0.365     | 0.439     | 0.114  | 0.29      | -0.408 | -0.656    | -0.058    | -0.079 |
| A004619_01 |    | 0.184 NA  |           | 0.312  | 0.192 NA  |        | -0.935    | 0.032     | -0.165 |
| A004620_01 |    | -0.085 NA |           | -0.044 | 0.405     | -0.132 | -0.135 NA | NA        |        |
| A004622_01 |    | -2.761    | -2.321 NA | NA     |           | -3.848 | -4.817 NA | NA        |        |
| A004623_01 |    | 0.112     | 0.199     | 0.016  | 0.025     | 0.259  | 0.13      | 0.063     | 0.018  |
| A004629_01 |    | 0.015     | 0.046     | -0.09  | 0.006     | -0.613 | -0.717    | 0.016     | -0.039 |
| A004630_01 |    | -0.355    | -0.388    | 0.001  | -0.069    | -0.178 | -0.214    | 0.018     | 0.079  |
| A004634_01 |    | -0.163    | 0.359     | -0.423 | -0.541    | 0.312  | 0.74      | -0.503    | 0.065  |
| A004635_01 |    | 0.08 NA   |           | 0.008  | 0.203     | 0.156  | 0.19 NA   | NA        |        |
| A004636_01 |    | -0.188    | -0.05     | -0.186 | -0.29     | 0.374  | 0.418     | 0.114 NA  |        |
| A004637_01 |    | -0.569    | -0.369    | 0.095  | 0.136 NA  |        | -0.568    | -0.189 NA |        |
| A004644_01 |    | 0.173     | -0.028    | -0.14  | 0.082     | -0.097 | -0.219    | 0.191     | -0.018 |
| A004645_01 |    | 0.053     | 0.108     | -0.078 | 0.293     | -0.283 | -0.345    | -0.279    | -0.448 |
| A004646_01 |    | -0.632    | -0.594    | -0.481 | -0.288    | 0.031  | 0.257     | 0.153     | 0.273  |
| A004649_01 |    | -0.112    | -0.073    | -0.223 | -0.181    | 0.159  | 0.254     | 0.029     | 0.094  |
| A004650_01 |    | -0.11 NA  |           | 0.199  | 0.245     | -0.124 | -0.068    | -0.163    | -0.147 |
| A004652_01 | NA | NA        |           | -0.253 | 0.015 NA  | NA     | NA        |           | -0.282 |
| A004653_01 |    | 0.158 NA  | NA        | NA     | NA        |        | -0.008 NA | NA        |        |
| A004656_01 |    | 0.284     | 0.326     | 0.618  | 0.601     | 0.108  | -0.041    | -0.263    | -0.222 |
| A004657_01 |    | -0.28     | -0.205    | -0.411 | -0.08     | -0.345 | -0.314    | -0.352 NA |        |
| A004659_01 |    | 0.195     | 0.097     | 0.124  | 0.019     | 0.218  | 0.172     | 0.192     | 0.198  |
| A004664_01 |    | 0.22      | 0.044     | 0.196  | 0.112     | 0.231  | 0.226     | 0.311     | 0.243  |
| A004669_01 |    | 0.041     | 0         | 0.27   | 0.201     | 0.289  | 0.29      | -0.08     | 0.21   |
| A004670_01 |    | 0.289     | -0.034    | -0.171 | -0.139    | 0.157  | -0.017    | 0.098     | 0.046  |
| A004671_01 |    | -0.144    | 0.048     | 0.083  | 0.091     | -0.059 | -0.083    | -0.136    | -0.136 |
| A004678_01 |    | -0.066    | 0.06      | 0.157  | 0.115     | 0.085  | -0.004    | 0.109     | -0.047 |
| A004680_01 |    | -0.293    | -0.255    | -0.052 | -0.063    | -0.426 | -0.661    | 0.168     | 0.148  |
| A004682_01 |    | 0.133     | -0.025    | 0.647  | 0.379     | -0.21  | -0.229    | -0.285    | -0.26  |
| A004683_01 |    | 0.064     | 0.226     | 0.209  | 0.218     | -0.346 | -0.437    | -0.209    | 0.028  |
| A004684_01 |    | -0.561    | -0.544    | -1.351 | -1.018    | -1.479 | -1.54     | -1.147    | -1.186 |
| A004688_01 |    | 0.034     | -0.031    | 0.19   | 0.045     | 0.297  | 0.348     | -0.019    | 0.034  |
| A004689_01 |    | -0.353    | -0.187    | 0.745  | 0.768     | -0.645 | -0.84     | -0.479    | -0.544 |
| A004695_01 |    | -0.22     | -0.121    | 0.023  | 0.163     | -0.025 | 0.02      | -0.062    | 0.004  |
| A004696_01 |    | -0.138 NA |           | -0.399 | -0.138 NA | NA     | NA        | NA        |        |
| A004701_01 |    | -0.404 NA | NA        | NA     |           | 0.2    | 0.527 NA  |           | 0.504  |



|            |           |        |           |           |        |           |        |        |
|------------|-----------|--------|-----------|-----------|--------|-----------|--------|--------|
| A004704_01 | 0.678     | 0.968  | -0.545    | -0.351    | -0.41  | -0.706    | 0.326  | 0.584  |
| A004705_01 | 0.257     | 0.249  | 0.117     | 0.148     | -0.167 | -0.289    | 0.009  | 0.018  |
| A004714_01 | -0.324    | -0.377 | -0.23     | -0.003    | -0.235 | -0.063 NA | NA     |        |
| A004716_01 | 0.035 NA  |        | 0.393     | 0.209     | 0.56   | 0.786     | 0.408  | 0.182  |
| A004717_01 | 0.206     | 0.184  | 0.005     | -0.012    | -0.06  | -0.1      | -0.037 | -0.137 |
| A004722_01 | 0.413     | 0.415  | 0.189     | 0.131     | 0.438  | 0.299     | -0.54  | -0.633 |
| A004725_01 | -0.071 NA |        | -0.086    | -0.104    | 0.105  | 0.093 NA  |        | -0.031 |
| A004727_01 | -0.044 NA |        | 0.527     | 0.313     | -0.056 | -0.051 NA |        | -0.456 |
| A004728_01 | 0.247     | 0.258  | 0.02      | 0.205     | 0.162  | 0.38      | -0.314 | -0.16  |
| A004735_01 | 0.116     | 0.336  | 0.088     | 0.336     | -0.032 | 0         | -0.021 | -0.089 |
| A004736_01 | 0.065     | -0.012 | -0.177    | -0.279    | 0.121  | 0.182     | 0.121  | 0.196  |
| A004738_01 | -0.324    | -0.068 | 0.158     | 0.186     | 0.182  | 0.38      | -0.033 | 0.209  |
| A004739_01 | -0.639 NA | NA     | NA        | NA        | NA     | NA        | NA     | NA     |
| A004740_01 | -0.302 NA |        | -0.067 NA |           | -0.096 | 0.301 NA  | NA     | NA     |
| A004743_01 | -0.158 NA |        | 0.219     | 0.254 NA  |        | -0.031    | -0.241 | -0.092 |
| A004744_01 | -0.368    | -0.069 | -0.092    | -0.036    | -0.181 | -0.213    | -0.304 | 0.118  |
| A004747_01 | 0.032     | -0.181 | -0.034    | 0.105     | -0.14  | -0.183    | 0.091  | -0.032 |
| A004748_01 | -0.067    | -0.005 | -0.247    | -0.386    | 0.135  | 0.38      | -0.061 | -0.081 |
| A004752_01 | -0.392 NA |        | -0.036    | -0.121    | -0.462 | -0.607    | -0.22  | 0.096  |
| A004754_01 | 0.075     | 0.181  | -0.215    | -0.045    | -0.066 | 0.084 NA  | NA     |        |
| A004757_01 | 0 NA      |        | -0.114    | 0.034 NA  |        | 0.057     | 0.022  | 0.054  |
| A004759_01 | -0.155    | -0.119 | -0.003    | -0.134    | -0.478 | -0.484    | -0.078 | 0.126  |
| A004762_01 | 0.045     | 0.048  | 0.205     | 0.462     | 0.037  | 0.127     | -0.178 | -0.243 |
| A004766_01 | 0.048     | 0.032  | -0.045    | 0.068     | -0.031 | -0.131    | 0.104  | 0.071  |
| A004768_01 | -0.099 NA |        | 0.036     | -0.022    | -0.137 | -0.417    | 0.167  | 0.057  |
| A004769_01 | -0.01     | 0.17   | -0.134    | -0.119    | 0.256  | 0.516     | -0.222 | 0.065  |
| A004772_01 | -0.266    | -0.242 | -0.121    | -0.012    | -0.251 | -0.192    | -0.081 | 0.012  |
| A004774_01 | 0.179     | 0.315  | 0.017     | 0.024     | 0.134  | 0.266     | 0.083  | 0.2    |
| A004777_01 | 0.215     | 0.379  | 0.229     | 0.319     | 0.482  | 0.708     | -0.229 | -0.097 |
| A004789_01 | -0.057    | -0.037 | -0.169    | -0.079    | -0.081 | 0.017     | 0.251  | 0.302  |
| A004792_01 | -0.051    | -0.096 | -0.111    | 0.093     | 0.107  | 0.108     | 0.069  | 0.011  |
| A004795_01 | -0.217 NA |        | -0.184    | -0.422 NA | NA     | NA        |        | -0.119 |
| A004799_01 | -0.046 NA |        | 0.123     | 0.108 NA  |        | -0.302    | 0.173  | 0.135  |
| A004801_01 | -0.256    | 0.062  | -0.094    | -0.177    | -0.097 | -0.08     | -0.149 | 0.077  |
| A004804_01 | -0.075    | 0.107  | -0.006    | 0.245     | -0.602 | -0.529    | -0.123 | -0.191 |
| A004805_01 | -0.398 NA |        | 0.12      | 0.093 NA  |        | -1.184    | -0.159 | 0.071  |
| A004810_01 | 0.169     | 0.237  | 0.168     | 0.384     | 0      | -0.305    | -0.169 | -0.298 |
| A004815_01 | 0.204     | 0.394  | 0.142     | 0.124     | -0.094 | -0.041    | -0.063 | 0.019  |
| A004820_01 | -0.239    | -0.158 | -0.103    | 0.124     | -1.259 | -1.427    | -0.198 | -0.304 |
| A004825_01 | -0.287    | -0.263 | 0.011     | 0.076     | -0.021 | 0.176     | 0.028  | 0.003  |
| A004828_01 | 0.09 NA   |        | -0.049    | 0.054     | 0.262  | 0.432     | 0.216  | 0.118  |
| A004830_01 | 0.345     | 0.3    | -0.186    | 0.177 NA  |        | 0.246 NA  |        | 0.084  |
| A004837_01 | 0.283     | 0.143  | 0.181     | 0.159     | 0.135  | 0.213     | -0.01  | -0.084 |
| A004839_01 | -0.318    | -0.211 | -0.103    | -0.177    | -0.322 | -0.258    | 0.023  | 0.154  |
| A004842_01 | 0.119     | 0.047  | -0.331    | 0.068     | -0.038 | 0.195     | 0.013  | -0.049 |
| A004843_01 | 0.101     | 0.173  | 0.078     | 0.055     | 0.56   | 0.754     | 0.35   | 0.487  |
| A004846_01 | -0.83     | -0.707 | -0.494    | -0.414    | -0.471 | -0.287    | -0.899 | -0.69  |
| A004848_01 | 0.314     | 0.662  | 0.337     | 0.619 NA  |        | 0.1       | -0.158 | -0.104 |
| A004853_01 | 0.17      | 0.052  | 0.231     | 0.275     | -0.317 | -0.37     | -0.429 | -0.27  |
| A004859_01 | -0.265 NA |        | 0.776     | 0.711 NA  | NA     |           | -0.232 | -0.168 |
| A004860_01 | 0.408     | 0.569  | 0.013     | -0.154    | -0.127 | -0.138    | -0.096 | 0.083  |
| A004862_01 | -0.103    | -0.042 | -0.069    | -0.159 NA |        | -0.199    | -0.013 | 0.027  |
| A004863_01 | -0.282    | -0.189 | -0.128    | -0.052    | -0.377 | -0.276    | -0.029 | -0.054 |
| A004866_01 | 0.077     | -0.053 | -0.355    | -0.019    | -0.04  | 0.216     | -0.035 | -0.079 |
| A004867_01 | 0.072     | 0.219  | -0.051    | 0.064     | 0.065  | 0.114     | 0.068  | 0.175  |
| A004882_01 | 0.104     | 0.091  | -0.236 NA |           | -0.012 | 0.261 NA  | NA     |        |
| A004883_01 | -0.172    | -0.159 | -0.238    | -0.168    | -0.03  | -0.012    | -0.034 | 0.075  |
| A004885_01 | -0.169    | -0.078 | -0.396    | -0.41     | -0.126 | -0.27     | -0.155 | -0.181 |
| A004887_01 | -0.389    | -0.231 | -0.282    | -0.127    | -0.064 | 0.06      | -0.175 | 0.016  |
| A004889_01 | 0.095 NA  |        | -0.07     | 0.08      | -0.035 | -0.026    | 0.013  | 0.029  |
| A004891_01 | 0.186     | 0.226  | -0.012    | -0.151    | 0.099  | 0.064     | -0.03  | 0.004  |
| A004894_01 | -0.173    | -0.143 | 0.67      | 0.592     | 0.013  | -0.033    | -0.523 | -0.608 |
| A004896_01 | 0.16      | 0.196  | -0.005    | 0.166     | 0.154  | 0.153     | 0.076  | 0.097  |
| A004901_01 | 0.404 NA  |        | 0.014     | 0.182 NA  |        | 0.173     | 0.023  | -0.193 |
| A004903_01 | -0.079    | -0.076 | -0.184    | -0.453    | 0.06   | -0.214    | 0.229  | 0.251  |
| A004908_01 | 0.03 NA   |        | -0.024    | -0.075 NA |        | -0.895    | 0.157  | 0.048  |
| A004910_01 | -0.355    | -0.055 | -0.141    | 0.168 NA  |        | -0.413    | -0.032 | 0.133  |
| A004915_01 | 0.481     | 0.54   | -0.232    | -0.168    | 0.127  | -0.003    | 0.244  | 0.256  |

|            |        |        |        |        |        |        |        |        |  |
|------------|--------|--------|--------|--------|--------|--------|--------|--------|--|
| A004916_01 | 0.104  | NA     | -0.004 | -0.036 | NA     | 0.153  | NA     | NA     |  |
| A004918_01 | 0.03   | NA     | -0.13  | -0.13  |        | -0.378 | 0.43   | 0.329  |  |
| A004921_01 | 0.189  | 0.202  | -0.271 | -0.119 | -0.276 | -0.452 | 0.035  | 0.063  |  |
| A004922_01 | -0.085 | -0.288 | -0.237 | -0.012 | -0.125 | -0.234 | NA     | NA     |  |
| A004927_01 | -0.357 | -0.352 | -0.035 | 0.026  | -0.251 | -0.126 | -0.255 | -0.092 |  |
| A004931_01 | -0.152 | 0.061  | -0.515 | -0.278 | 0.249  | 0.512  | 0.022  | 0.023  |  |
| A004932_01 | -0.311 | -0.115 | -0.261 | 0.054  | 0.02   | 0.482  | 0.02   | 0.192  |  |
| A004934_01 | 0.003  | 0.001  | -0.155 | -0.262 | 0.097  | 0.19   | -0.222 | -0.007 |  |
| A004941_01 | 0.037  | 0.095  | -0.403 | -0.126 | -0.029 | 0.005  | 0.104  | 0.167  |  |
| A004944_01 | -0.071 | -0.071 | -0.007 | 0.024  | 0.167  | 0.429  | 0.175  | 0.459  |  |
| A004948_01 | -0.081 | NA     | 0.054  | 0.145  | -0.282 | -0.357 | 0.006  | -0.024 |  |
| A004962_01 | 0.289  | 0.282  | 0.205  | 0.23   | 0.257  | 0.31   | 0.132  | 0.28   |  |
| A004978_01 | -0.009 | 0.037  | -0.428 | -0.206 | 0.077  | 0.292  | NA     | 0.035  |  |
| A004994_01 | -0.175 | 0.154  | 0.27   | 0.213  | 0.413  | 0.604  | -0.306 | 0.07   |  |
| A005002_01 | -0.213 | -0.182 | 0.111  | 0.329  | -0.531 | -0.501 | -0.223 | -0.203 |  |
| A005005_01 | -0.758 | -0.418 | -0.142 | -0.019 | -1.32  | -1.429 | -0.367 | -0.404 |  |
| A005009_01 | 0.453  | 0.873  | -0.373 | -0.315 | 0.092  | -0.012 | 0.232  | 0.382  |  |
| A005012_01 | -1.063 | NA     | 0.52   | 0.456  | -0.463 | NA     | -0.182 | -0.017 |  |
| A005018_01 | 0.302  | 0.125  | 0.22   | -0.336 | 0.255  | 0.355  | -0.052 | 0.389  |  |
| A005022_01 | -0.192 | -0.165 | -0.232 | -0.054 | -0.113 | -0.067 | 0.056  | 0.154  |  |
| A005023_01 | -0.169 | 0.006  | 0.224  | 0.396  | -0.224 | -0.294 | 0.142  | 0.184  |  |
| A005029_01 | -0.242 | -0.306 | -0.359 | 0.012  | -0.329 | 0.112  | -0.214 | -0.233 |  |
| A005042_01 | 0.261  | 0.419  | -0.168 | -0.265 | 0.369  | 0.669  | 0.077  | 0.422  |  |
| A005048_01 | -0.375 | 0.103  | -0.157 | -0.151 | 0.037  | 0.402  | 0.052  | 0.572  |  |
| A005065_01 | 0.303  | 0.184  | -0.043 | -0.067 | 0.252  | 0.344  | -0.057 | -0.04  |  |
| A005067_01 | -0.075 | 0.059  | -0.038 | 0.118  | -0.038 | -0.147 | NA     | 0.024  |  |
| A005068_01 | -0.202 | -0.154 | 0.238  | 0.237  | -0.057 | 0.034  | -0.209 | -0.089 |  |
| A005069_01 | -0.94  | -0.92  | -0.983 | -0.84  | -0.227 | -0.103 | -0.708 | -0.374 |  |
| A005075_01 | -1.184 | -1.443 | -0.866 | NA     | -1.569 | -1.865 | NA     | NA     |  |
| A005084_01 | 0.117  | 0.05   | -0.084 | -0.107 | 0.076  | 0.181  | -0.028 | -0.093 |  |
| A005086_01 | 0.133  | 0.464  | 0.089  | 0.197  | 0.102  | 0.042  | -0.42  | -0.225 |  |
| A005093_01 | 0.096  | 0.028  | -0.063 | 0.136  | -0.311 | -0.137 | -0.05  | 0.096  |  |
| A005095_01 | 0.076  | NA     | -0.026 | 0.236  | NA     | NA     | -0.046 | 0.122  |  |
| A005097_01 | -0.071 | 0.131  | -0.415 | -0.485 | 0.175  | 0.395  | 0.141  | 0.318  |  |
| A005122_01 | 0.285  | 0.159  | -0.203 | -0.055 | -0.043 | -0.006 | 0.096  | 0.164  |  |
| A005126_01 | 0.005  | NA     | 0.252  | 0.234  | NA     | -0.306 | 0.093  | 0.176  |  |
| A005129_01 | 0.015  | NA     | 0.193  | 0.204  | 0.48   | 0.514  | 0.09   | 0.138  |  |
| A005132_01 | 0.335  | 0.142  | 0.261  | -0.014 | 0.367  | 0.243  | NA     | -0.114 |  |
| A005145_01 | -0.413 | -0.346 | 0.291  | 0.164  | 0.08   | 0.046  | 0.161  | 0.195  |  |
| A005146_01 | -0.255 | -0.305 | 0.194  | 0.03   | -0.322 | -0.233 | -0.231 | -0.174 |  |
| A005155_01 | -0.883 | -0.491 | -1.707 | -1.434 | -2.012 | -1.91  | NA     | -0.944 |  |
| A005160_01 | 0.082  | 0.21   | 0.204  | 0.428  | 0.118  | 0.226  | -0.113 | -0.007 |  |
| A005162_01 | 0.258  | 0.182  | -0.497 | -0.288 | -0.094 | 0.045  | -0.025 | 0.102  |  |
| A005163_01 | 0.158  | -0.044 | 0.077  | 0.087  | 0.163  | 0.23   | 0.073  | 0.149  |  |
| A005164_01 | -0.377 | -0.11  | 0.159  | 0.173  | 0.1    | 0.396  | -0.534 | -0.369 |  |
| A005167_01 | -0.148 | 0.069  | -0.012 | 0.02   | 0.125  | 0.245  | 0.005  | 0.253  |  |
| A005171_01 | -0.522 | -0.21  | 0.328  | 0.307  | -0.364 | -0.545 | -0.247 | -0.475 |  |
| A005173_01 | -0.054 | -0.058 | -0.112 | -0.185 | 0.096  | 0.015  | -0.047 | -0.106 |  |
| A005175_01 | -0.185 | 0.006  | 0.236  | 0.08   | 0.502  | 0.588  | -0.083 | 0.084  |  |
| A005176_01 | -3.056 | -2.118 | -5.119 | -3.837 | 0.579  | 1.166  | -1.913 | -2.116 |  |
| A005178_01 | -0.323 | 0.018  | 0.032  | -0.008 | -0.215 | -0.153 | -0.318 | -0.078 |  |
| A005179_01 | 0.099  | NA     | 0.442  | 0.378  | NA     | -0.304 | -0.222 | -0.207 |  |
| A005180_01 | -0.128 | 0.064  | 0.035  | 0.032  | -0.053 | -0.05  | -0.243 | -0.096 |  |
| A005182_01 | -0.021 | 0.077  | 0.231  | 0.152  | 0.482  | 0.673  | -0.114 | -0.021 |  |
| A005187_01 | -0.173 | -0.239 | 0.063  | 0.147  | 0.061  | 0.085  | -0.032 | 0.145  |  |
| A005188_01 | -0.187 | -0.236 | -0.09  | -0.01  | -0.235 | -0.262 | 0.096  | 0.105  |  |
| A005190_01 | NA     | NA     | -0.074 | 0.221  | NA     | -0.077 | NA     | -0.442 |  |
| A005195_01 | -0.504 | -0.334 | 0.089  | 0.049  | -0.002 | 0.043  | -0.189 | -0.17  |  |
| A005196_01 | 0.261  | NA     | -0.535 | NA     | NA     | NA     | NA     | 0.173  |  |
| A005197_01 | -0.206 | -0.094 | 0.113  | 0.101  | 0.045  | 0.215  | -0.212 | 0.066  |  |
| A005199_01 | 0.175  | -0.015 | -0.178 | -0.207 | -0.102 | -0.078 | NA     | NA     |  |
| A005203_01 | -0.126 | -0.014 | 0.126  | 0.151  | -0.242 | -0.17  | -0.068 | 0.22   |  |
| A005204_01 | -0.066 | -0.186 | 0.152  | 0.047  | -0.296 | -0.446 | -0.265 | -0.33  |  |
| A005208_01 | -1.405 | -0.994 | -0.285 | -0.289 | NA     | -2.822 | NA     | -1.405 |  |
| A005209_01 | 0.262  | NA     | 0.443  | 0.49   | NA     | NA     | NA     | -0.188 |  |
| A005211_01 | -0.359 | -0.191 | -0.4   | -0.181 | -0.138 | 0.143  | -0.194 | 0.024  |  |
| A005214_01 | -0.411 | -0.634 | -0.722 | NA     | -0.307 | -0.486 | NA     | -0.098 |  |
| A005220_01 | -0.205 | 0.234  | -0.183 | -0.077 | 0.05   | 0.448  | -0.299 | 0.257  |  |

|            |        |        |        |        |        |        |        |        |
|------------|--------|--------|--------|--------|--------|--------|--------|--------|
| A005223_01 | -0.515 | NA     | -0.115 | 0.063  | NA     | -0.675 | NA     | -0.253 |
| A005224_01 | 0.098  | NA     | 0.637  | 0.646  | NA     | 0.142  | -0.117 | -0.226 |
| A005227_01 | -0.026 | NA     | -0.203 | -0.196 | 0.082  | -0.078 | 0.141  | 0.201  |
| A005234_01 | 0.081  | NA     | NA     | NA     | -0.036 | 0.186  | NA     | NA     |
| A005236_01 | -0.056 | -0.069 | -0.182 | -0.104 | 0.065  | 0.159  | NA     | NA     |
| A005239_01 | 0.153  | NA     | NA     | NA     | -0.064 | -0.008 | NA     | -0.116 |
| A005246_01 | -0.05  | 0.399  | 0.263  | 0.208  | -0.392 | -0.321 | -0.784 | -0.398 |
| A005247_01 | 0.068  | -0.098 | 0.162  | 0.1    | -0.237 | -0.371 | 0.103  | -0.017 |
| A005249_01 | -0.07  | NA     | -0.238 | -0.081 | 0.332  | 0.482  | NA     | 0.205  |
| A005251_01 | -0.18  | NA     | -0.109 | 0.254  | NA     | NA     | NA     | 0.05   |
| A005260_01 | -0.044 | -0.056 | -0.257 | -0.232 | -0.013 | -0.142 | 0.263  | 0.245  |
| A005262_01 | -0.325 | -0.128 | 0.119  | 0.295  | 0.019  | 0.363  | -0.352 | 0.038  |
| A005267_01 | 0.323  | 0.417  | 0.414  | 0.32   | -0.237 | -0.383 | -0.203 | 0.015  |
| A005278_01 | -0.039 | 0.021  | -0.165 | -0.162 | -0.09  | -0.052 | 0.042  | 0.123  |
| A005279_01 | -0.493 | -0.169 | 0.358  | 0.24   | 0.118  | 0.218  | -0.209 | -0.017 |
| A005302_01 | 0.174  | 0.342  | 0.146  | 0.143  | 0.368  | 0.382  | 0.103  | 0.146  |
| A005305_01 | 0.059  | 0.021  | 0.097  | 0.296  | -0.303 | -0.099 | -0.024 | 0.144  |
| A005310_01 | -0.527 | NA     | -0.134 | -0.265 | 0.572  | 1.154  | 0.229  | 0.772  |
| A005332_01 | 0.062  | 0.009  | -0.064 | 0.084  | 0.024  | 0.149  | -0.254 | -0.169 |
| A005335_01 | 0.265  | 0.116  | 0.357  | 0.364  | -0.341 | -0.472 | -0.265 | -0.391 |
| A005338_01 | -0.038 | 0.217  | 0.481  | 0.43   | 0.729  | 0.907  | 0.149  | 0.261  |
| A005346_01 | -0.158 | NA     | -0.025 | 0.154  | -0.17  | -0.195 | NA     | NA     |
| A005354_01 | -0.378 | NA     | -0.982 | -0.772 | NA     | -0.746 | -0.174 | 0.106  |
| A005356_01 | -0.075 | 0.002  | -0.153 | -0.157 | 0.394  | 0.479  | 0.279  | 0.425  |
| A005357_01 | 0.113  | 0.058  | -0.027 | -0.006 | 0.24   | 0.117  | -0.05  | -0.017 |
| A005366_01 | 0.621  | 0.674  | 0.107  | 0.19   | -0.417 | -0.837 | -0.169 | -0.095 |
| A005367_01 | 0.036  | -0.062 | -0.08  | -0.099 | -0.023 | -0.151 | 0.182  | 0.175  |
| A005368_01 | -0.249 | -0.161 | -0.084 | -0.084 | 0.117  | 0.181  | 0.015  | 0.124  |
| A005371_01 | -0.199 | 0.025  | -0.115 | -0.035 | -0.019 | 0.045  | -0.099 | -0.01  |
| A005376_01 | -0.071 | NA     | -0.238 | -0.062 | -0.005 | 0.114  | NA     | NA     |
| A005377_01 | -0.601 | 0.013  | -0.412 | -0.284 | 0.722  | 1.391  | -0.046 | 0.295  |
| A005384_01 | -1.072 | NA     | -0.822 | -0.636 | NA     | -1.159 | NA     | -1.332 |
| A005386_01 | -0.057 | -0.136 | -0.211 | -0.165 | -0.456 | -0.503 | 0.207  | 0.331  |
| A005389_01 | -0.679 | NA     | 0.102  | 0.162  | NA     | NA     | -0.075 | -0.042 |
| A005390_01 | -0.218 | -0.511 | -0.661 | -0.522 | -0.628 | -0.586 | -0.724 | -0.631 |
| A005391_01 | NA     | -0.069 | -0.037 | -0.126 | -0.327 | -0.356 | NA     | NA     |
| A005394_01 | -0.569 | -0.533 | 0.064  | 0.061  | -0.348 | -0.386 | -0.441 | -0.399 |
| A005395_01 | 0.041  | -0.115 | -0.171 | -0.121 | -0.153 | -0.229 | -0.032 | -0.12  |
| A005401_01 | 0.125  | NA     | 0.015  | 0.261  | -0.489 | -0.524 | 0.091  | 0.022  |
| A005403_01 | -0.247 | -0.34  | -0.558 | -0.471 | -0.479 | -0.514 | -0.417 | -0.524 |
| A005407_01 | 0.537  | 0.074  | -0.011 | -0.065 | 0.4    | 0.207  | 0.111  | -0.246 |
| A005410_01 | 0.315  | -0.078 | -0.324 | -0.339 | 0.027  | 0.103  | -0.028 | -0.146 |
| A005411_01 | -0.178 | 0.06   | -0.314 | -0.307 | 0.122  | 0.321  | -0.03  | 0.386  |
| A005413_01 | -0.02  | 0.197  | -0.06  | -0.075 | 0.107  | 0.125  | 0.02   | 0.172  |
| A005414_01 | 0.091  | 0.141  | -0.005 | 0.134  | 0.096  | -0.046 | -0.114 | -0.184 |
| A005416_01 | -0.212 | -0.135 | -0.023 | -0.027 | -0.047 | 0.099  | -0.075 | -0.027 |
| A005417_01 | 0.189  | 0.109  | -0.563 | -0.319 | 0.178  | 0.202  | 0.271  | 0.301  |
| A005426_01 | 0.333  | 0.44   | 0.243  | 0.28   | 0.19   | 0.339  | 0.09   | 0.096  |
| A005431_01 | -0.111 | 0.01   | 0.023  | 0.098  | -0.028 | -0.006 | 0.137  | 0.029  |
| A005434_01 | 0.301  | 0.066  | 0.06   | 0.159  | -0.275 | -0.56  | -0.487 | -0.786 |
| A005439_01 | 0.012  | 0.048  | -0.068 | 0.111  | -0.262 | -0.239 | 0.123  | 0.051  |
| A005477_01 | -0.098 | 0.414  | -0.106 | 0.089  | 0.089  | 0.438  | 0.107  | 0.4    |
| A005500_01 | -0.133 | -0.206 | 0.161  | 0.126  | -0.106 | -0.367 | -0.062 | -0.185 |
| A005506_01 | -0.037 | -0.046 | -0.154 | -0.215 | -0.421 | -0.484 | -0.177 | -0.069 |
| A005518_01 | 0.083  | NA     | NA     | 0.002  | 0.057  | 0.11   | NA     | NA     |
| A005521_01 | -0.078 | -0.09  | -0.027 | -0.026 | -0.34  | -0.404 | 0.179  | 0.215  |
| A005522_01 | -0.033 | 0.176  | 0.305  | 0.164  | 0.202  | 0.679  | -0.225 | 0.252  |
| A005526_01 | -0.071 | -0.202 | -0.088 | 0.105  | -0.453 | -0.485 | NA     | NA     |
| A005532_01 | -0.114 | -0.019 | -0.148 | -0.109 | -0.131 | -0.165 | -0.147 | -0.165 |
| A005542_01 | -0.154 | -0.133 | -0.316 | -0.183 | -0.315 | -0.487 | NA     | 0.047  |
| A005552_01 | -0.602 | NA     | NA     | NA     | -0.154 | NA     | NA     | -0.59  |
| A005553_01 | 0.114  | -0.014 | 0.203  | 0.161  | 0.141  | 0.091  | 0.11   | -0.013 |
| A005557_01 | 0.244  | 0.078  | 0.05   | -0.057 | 0.206  | 0.255  | 0.118  | 0.16   |
| A005558_01 | -0.453 | -0.112 | -0.052 | 0.108  | -0.077 | 0.284  | -0.239 | 0.246  |
| A005562_01 | -0.132 | -0.027 | -0.522 | -0.476 | 0.388  | 0.334  | 0.108  | 0.127  |
| A005564_01 | 0.117  | 0.318  | -0.148 | -0.06  | -0.006 | -0.046 | -0.19  | -0.105 |
| A005571_01 | -0.242 | -0.311 | -0.067 | 0.044  | -0.337 | -0.331 | 0.139  | -0.04  |
| A005576_01 | -0.948 | -1.007 | -0.892 | -0.854 | -1.549 | -1.915 | NA     | -1.282 |

|            |    |           |        |           |           |        |           |        |        |
|------------|----|-----------|--------|-----------|-----------|--------|-----------|--------|--------|
| A005577_01 |    | -0.03     | 0.178  | -0.174    | -0.36     | 0.096  | 0.087     | 0.168  | 0.454  |
| A005583_01 |    | 0.342     | 0.134  | -0.206    | -0.241    | -0.157 | -0.11     | 0.271  | 0.22   |
| A005588_01 |    | -0.007    | 0.052  | -0.379 NA |           | 0.357  | 0.53 NA   |        | 0.487  |
| A005589_01 |    | -0.023    | 0.219  | -0.168    | -0.179    | 0.277  | 0.512     | 0.073  | 0.335  |
| A005590_01 |    | -0.74     | -0.472 | -0.136    | -0.195    | -0.757 | -0.567    | -0.219 | 0.108  |
| A005591_01 |    | 0.13      | -0.078 | 0.226     | 0.345     | 0.096  | 0.088     | 0.14   | 0.052  |
| A005592_01 |    | 0.605     | 0.578  | 0.601     | 0.961     | 0.39   | 0.546     | -0.035 | -0.169 |
| A005594_01 |    | -0.078    | -0.142 | -0.129    | -0.165    | -0.069 | -0.075    | -0.017 | 0.031  |
| A005600_01 |    | -0.124    | 0.134  | -0.228 NA |           | 0.368  | 0.513 NA  |        | 0.392  |
| A005601_01 |    | 0.054     | 0.141  | -0.109    | -0.265    | 0.365  | 0.491     | -0.071 | 0.509  |
| A005609_01 |    | 0.06      | -0.038 | 0.164     | 0.242     | -0.171 | -0.063    | 0.022  | 0.221  |
| A005613_01 |    | 0.233     | 0.063  | 0.118     | 0.276     | -0.142 | -0.322    | 0.205  | 0.036  |
| A005615_01 |    | -0.21     | -0.005 | 0.227     | 0.06      | -0.31  | -0.295    | -0.341 | -0.125 |
| A005616_01 |    | -0.168    | 0.089  | -0.324    | -0.407    | 0.102  | 0.297     | -0.111 | 0.265  |
| A005620_01 |    | -0.205    | -0.007 | 0.205     | 0.089     | 0.705  | 0.894     | -0.098 | 0.108  |
| A005629_01 |    | 0.443     | 0.173  | -0.446    | -0.135    | 0.042  | 0.018     | 0.25   | 0.068  |
| A005636_01 |    | -0.045    | 0.328  | -0.216    | -0.277    | 0.134  | 0.377     | -0.053 | 0.429  |
| A005646_01 |    | -0.131    | -0.137 | -0.358    | -0.328    | -0.041 | -0.136    | -0.055 | -0.009 |
| A005648_01 |    | 0.024     | 0.012  | 0.374     | 0.4       | 0.905  | 1.164     | 0.447  | 0.433  |
| A005655_01 |    | 0.018     | 0.151  | -0.011    | 0.009     | 0.264  | 0.299     | 0.033  | 0.05   |
| A005659_01 | NA |           | NA     | -0.181    | -0.257 NA |        | NA        |        | 0.042  |
| A005661_01 |    | -2.894    | -2.096 | -2.865    | -2.375    | -3.427 | -4.15     | -2.38  | -2.19  |
| A005677_01 | NA |           | 0.08   | -0.28     | -0.223    | 0.115  | -0.055    | 0.088  | 0.193  |
| A005680_01 |    | -0.252    | -0.578 | -0.338    | -0.187    | -0.542 | -0.565    | -0.131 | -0.079 |
| A005687_01 |    | -0.569    | -0.424 | -0.627    | -0.295    | 0.025  | 0.435     | 0.38   | 0.559  |
| A005688_01 |    | -0.34     | 0.109  | -0.176    | -0.285    | 0.361  | 0.495     | -0.066 | 0.285  |
| A005690_01 |    | 0.078     | 0.009  | 0.04      | 0.095     | 0.143  | 0.173     | -0.056 | -0.034 |
| A005692_01 |    | -0.071 NA |        | -0.062    | -0.118 NA |        | NA        | 0.022  | 0.191  |
| A005695_01 |    | 0.27      | 0.403  | 0.12      | 0.315     | 0.658  | 0.828     | 0.466  | 0.564  |
| A005699_01 |    | -0.772    | -0.648 | 0.217     | 0.244     | 0.147  | 0.24      | -0.049 | 0.086  |
| A005701_01 |    | 0.093     | 0.305  | -0.138    | -0.136    | 0.034  | 0.083     | -0.055 | 0.193  |
| A005702_01 |    | -0.463 NA |        | -0.55     | -0.238    | -0.44  | -0.449 NA |        | NA     |
| A005703_01 |    | 0.087     | -0.004 | -0.235    | -0.235    | -0.303 | -0.251    | 0.225  | 0.306  |
| A005706_01 |    | -0.373    | -0.117 | 0.128     | 0.064     | 0.403  | 0.67      | 0.017  | 0.166  |
| A005707_01 |    | -0.64     | -0.408 | 0.049     | 0.209     | 0.52   | 0.805     | 0.036  | 0.37   |
| A005708_01 |    | -0.499    | -0.475 | -0.042    | 0.239     | 0.416  | 0.772     | 0.147  | 0.285  |
| A005709_01 |    | -0.666    | -0.56  | 0.118     | 0.232     | 0.397  | 0.889     | 0.088  | 0.138  |
| A005710_01 |    | -0.11     | -0.014 | -0.481    | 0.078     | -0.168 | -0.013 NA |        | NA     |
| A005712_01 |    | -0.16     | -0.063 | 0.425     | 0.353     | 0.487  | 0.532     | -0.327 | -0.249 |
| A005713_01 |    | -0.354    | -0.466 | -0.477    | -0.391    | -0.466 | -0.412    | -0.283 | -0.076 |
| A005714_01 |    | -1.637    | -1.431 | -1.371    | -0.93     | -2.7   | -3.037    | -1.599 | -1.579 |
| A005715_01 |    | -0.255    | -0.283 | -0.135    | 0.042     | -0.729 | -0.464    | -0.026 | 0.243  |
| A005718_01 |    | -0.388    | -0.216 | 0.021     | -0.05     | 0.584  | 0.864     | 0.094  | 0.28   |
| A005719_01 |    | -0.47     | -0.279 | 0.123     | 0.306     | 0.304  | 0.584     | -0.184 | 0.046  |
| A005720_01 |    | -0.882    | -0.776 | 0.319     | 0.507     | 0.752  | 1.184     | 0.074  | 0.234  |
| A005721_01 |    | -0.678    | -0.609 | 0.082     | 0.227     | 0.419  | 0.793     | 0.184  | 0.39   |
| A005722_01 |    | -0.346    | -0.309 | -0.068    | -0.01     | -0.452 | -0.357 NA |        | NA     |
| A005723_01 |    | -0.407    | -0.269 | -0.13     | 0.089     | -0.567 | -0.448 NA |        | NA     |
| A005725_01 |    | 0.069     | -0.008 | -0.134    | 0.146     | -0.219 | -0.163    | -0.01  | 0.072  |
| A005726_01 |    | -0.734    | -0.691 | -0.183    | 0.058     | -0.812 | -0.72     | -0.249 | 0.067  |
| A005727_01 |    | -1.06     | -0.528 | -0.307    | -0.131    | -4.51  | -5.222    | -0.87  | -0.533 |
| A005729_01 |    | -0.959    | -0.416 | -0.734    | -0.73     | -0.107 | 0.388     | -0.473 | 0.022  |
| A005730_01 |    | -0.757    | -0.675 | -0.3      | -0.23     | -0.238 | -0.017    | -0.723 | -0.411 |
| A005731_01 |    | -0.754    | -0.534 | 0.162     | 0.275     | 0.533  | 0.993     | 0.002  | 0.271  |
| A005732_01 |    | -0.285    | -0.073 | -0.117    | -0.11     | 0.091  | 0.495     | -0.175 | 0.249  |
| A005733_01 |    | -0.189    | -0.398 | -0.055    | -0.028    | 0.566  | 0.922     | -0.813 | -0.728 |
| A005736_01 |    | -0.065    | 0.06   | -0.172    | -0.174    | -0.004 | 0.126     | -0.073 | -0.023 |
| A005739_01 |    | 0.326     | 0.513  | -0.006    | 0.041     | 0.184  | 0.202     | -0.167 | -0.009 |
| A005740_01 |    | 0.113     | 0.234  | -0.215    | -0.051    | -0.002 | 0.24      | 0.192  | 0.596  |
| A005741_01 |    | -0.072    | 0.222  | 0.086     | 0.181     | 0.326  | 0.355     | 0.426  | 0.432  |
| A005742_01 |    | -0.491    | -0.142 | 0.107     | 0.022     | -0.303 | -0.292    | -0.231 | -0.036 |
| A005743_01 |    | -0.401    | -0.361 | 0.115     | 0.268     | -0.102 | 0.015     | -0.13  | 0.012  |
| A005744_01 |    | 0.197     | 0.217  | 0.118     | 0.158     | 0.302  | 0.357     | 0.053  | 0.111  |
| A005745_01 |    | -0.033    | -0.132 | -0.063    | -0.089    | -0.16  | -0.04     | -0.044 | -0.041 |
| A005746_01 |    | -0.447    | -0.266 | -0.215    | -0.009    | -1.125 | -1.164    | -0.307 | -0.244 |
| A005749_01 |    | -0.11     | -0.003 | 0.416     | 0.343     | -0.017 | -0.265    | -0.404 | -0.633 |
| A005750_01 |    | 0.266     | 0.087  | -0.266    | 0.1       | 0.127  | 0.189 NA  |        | NA     |
| A005751_01 |    | 0.523     | 0.756  | 0.279     | 0.368     | 0.151  | 0.312     | 0.201  | 0.407  |

|            |           |          |           |           |          |           |           |        |
|------------|-----------|----------|-----------|-----------|----------|-----------|-----------|--------|
| A005754_01 | -0.811    | -0.632   | -0.203    | 0.162     | 0.183    | 0.522 NA  |           | 0.228  |
| A005755_01 | -0.386    | -0.331   | 0.228     | 0.369     | 0.54     | 0.795     | -0.122    | 0.228  |
| A005763_01 | 0.431 NA  |          | 0.146     | 0.27 NA   |          | 0.433     | 0.483     | 0.53   |
| A005766_01 | -0.617    | -0.39    | 0.012     | -0.006    | -0.345   | -0.196    | -0.05     | 0.163  |
| A005771_01 | -0.505    | -0.299   | -0.193    | -0.087    | -1.112   | -1.073    | -0.545    | -0.215 |
| A005782_01 | -0.283 NA |          | -0.513 NA | NA        |          | -0.385 NA | NA        |        |
| A005783_01 | -0.525 NA | NA       |           | -0.062 NA |          | -1.036    | 0.262     | 0.216  |
| A005784_01 | 0.062 NA  |          | -0.118    | 0.095 NA  |          | 0.134 NA  |           | -0.026 |
| A005787_01 | -0.189    | -0.173   | -0.582    | -0.547    | 0.258    | 0.399     | 0.085     | 0.273  |
| A005792_01 | 0.187     | 0.196    | -0.632    | -0.314    | -0.063   | 0.026     | 0.403     | 0.328  |
| A005827_01 | -0.406    | -0.193   | -0.23     | -0.12     | 0.161    | 0.581     | -0.266    | 0.121  |
| A005834_01 | -0.127    | 0.175    | -0.137    | -0.121    | 0.058    | 0.416     | 0.255     | 0.519  |
| A005835_01 | -0.087    | 0.143    | 0.21      | 0.235     | -0.507   | -0.815    | -0.173    | -0.102 |
| A005839_01 | -0.134    | 0.126    | -0.038    | -0.079    | 0.31     | 0.431     | -0.222    | 0.19   |
| A005845_01 | 0.586     | 0.345    | -0.454    | -0.181    | -0.457   | -0.899    | -0.041    | -0.244 |
| A005846_01 | -0.044    | 0.276    | -0.118    | -0.24     | -0.05    | 0.144     | -0.107    | 0.272  |
| A005856_01 | -0.403    | -0.369   | -0.185    | 0.11      | -0.317   | 0.034     | -0.068    | 0.13   |
| A005864_01 | 0.006     | 0.18     | 0.151     | 0.424     | -0.126   | -0.04     | -0.119    | -0.181 |
| A005869_01 | -0.146    | 0.225    | 0.022     | 0.232     | 0.02     | 0.119 NA  | NA        |        |
| A005870_01 | -0.201    | -0.166   | -0.175    | -0.108    | 0.004    | 0.207     | 0.18      | 0.349  |
| A005879_01 | -0.163 NA |          | -0.331    | -0.2 NA   | NA       |           | 0.267     | 0.145  |
| A005885_01 | -0.011 NA |          | -0.13     | 0.119     | 0.003    | 0.035     | -0.041    | -0.108 |
| A005906_01 | -0.481    | -0.203   | -1.413    | -1.415    | -1.273   | -1.059    | -1.531    | -1.112 |
| A005910_01 | -0.136    | 0.268    | 0.036     | 0.046     | 0.399    | 0.786     | -0.496 NA |        |
| A005911_01 | -0.142 NA |          | -0.151    | -0.139    | 0.309 NA |           | -0.019    | 0.197  |
| A005914_01 | 0.122     | 0.034    | -0.057    | 0.067     | 0.104    | 0.275     | -0.103    | 0.016  |
| A005915_01 | -0.141    | -0.026   | 0.151     | 0.12      | -0.335   | -0.314    | -0.146    | -0.03  |
| A005916_01 | -0.12     | -0.032   | 0.056     | 0.128     | -0.091   | -0.084    | -0.376    | -0.158 |
| A005926_01 | 0.217     | 0.208    | -0.149    | 0.047     | 0.341    | 0.422     | -0.175    | 0.025  |
| A005928_01 | -0.008 NA |          | -0.339    | -0.12 NA  |          | 0.13      | 0.181     | 0.519  |
| A005930_01 | 0.083     | 0.152    | 0.104     | 0.002     | 0.01     | -0.071    | -0.069    | 0.121  |
| A005933_01 | 0.107     | 0.178    | -0.132    | -0.226    | 0.341    | 0.3       | 0.018     | 0.04   |
| A005935_01 | -0.052    | 0.008    | -0.15     | -0.015    | 0.112    | 0.069     | -0.061    | 0.042  |
| A005936_01 | 0.259 NA  |          | -0.05     | 0.219 NA  |          | -0.195    | 0.002     | 0.069  |
| A005938_01 | 0.049     | -0.079   | 0.063     | 0.034     | 0.067    | -0.057    | 0.155     | 0.078  |
| A005939_01 | 0.535     | 0.384    | -0.382    | -0.428    | 0.004    | 0.051     | 0.187     | 0.317  |
| A005946_01 | -0.445    | -0.535   | 0.315     | 0.207     | -0.661   | -0.818    | -0.614    | -0.811 |
| A005948_01 | 0.194     | 0.3      | -0.33     | -0.421    | 0.192    | 0.196     | 0.121     | 0.247  |
| A005949_01 | -0.006    | 0.208    | -0.008    | -0.308    | -0.144   | -0.441 NA | NA        |        |
| A005954_01 | 0.032     | -0.046   | 0.124     | 0.125     | 0.173    | 0.148     | 0.153     | 0.18   |
| A005955_01 | -0.334    | -0.015   | -0.283    | -0.12     | 0.015    | 0.161     | 0.093     | 0.315  |
| A005958_01 | -0.178    | -0.361   | 0.309     | 0.312     | -0.168   | 0.079     | -0.269    | -0.086 |
| A005959_01 | 0.081     | 0.353    | -0.402    | -0.32     | 0.228    | 0.408     | 0.125     | 0.342  |
| A005962_01 | 0.568     | 0.086    | -0.07     | -0.156    | -0.602   | -1.07     | 0.559     | 0.354  |
| A005963_01 | -0.343 NA |          | -0.041    | -0.187    | -0.36    | -0.469    | -0.098    | 0.143  |
| A005965_01 | 0.232     | 0.246    | 0.024     | -0.075    | 0.278    | 0.377     | -0.145    | -0.02  |
| A005969_01 | 0.138     | 0.127    | 0.038     | 0.241     | 0.397    | 0.552     | 0.179     | 0.275  |
| A005972_01 | -0.123    | -0.019   | -0.079    | -0.17     | 0.026    | 0.066     | -0.178    | 0.039  |
| A005981_01 | 0.552     | 0.188    | -0.147    | -0.036    | 0.098    | -0.053    | 0.098     | 0.075  |
| A005984_01 | -1.082    | -1.014   | 0.5       | 0.788     | 0.532    | 0.843 NA  | NA        |        |
| A005989_01 | -0.012    | -0.252   | 0.028     | 0.025     | -0.117   | -0.43     | 0.121     | -0.033 |
| A005991_01 | -3.287    | -2.023   | -4.915    | -3.461    | 0.69     | 1.355     | -1.848    | -1.913 |
| A005992_01 | -0.048    | -0.21    | -0.061    | -0.065    | 0.301    | 0.489     | -0.025    | 0.208  |
| A005999_01 | 0.033 NA  |          | -0.176    | -0.135    | -0.18    | -0.062    | -0.703    | -0.265 |
| A006003_01 | 0.125     | 0.099    | -0.242    | -0.066    | 0.015    | -0.002 NA |           | -0.035 |
| A006014_01 | 0.323     | 0.38 NA  |           | -0.51     | 0.164    | 0.043     | 0.278     | 0.259  |
| A006015_01 | -0.066    | -0.019   | -0.209    | -0.259    | 0.704    | 0.526     | 0.455     | 0.118  |
| A006017_01 | 0.073     | -0.053   | -0.115    | -0.005    | -0.139   | -0.158    | 0.062     | -0.086 |
| A006021_01 | 1.066     | 0.866    | -0.472    | -0.424    | -0.614   | -1.011    | 0.229     | 0.211  |
| A006022_01 | -0.032    | 0.214    | -0.389    | -0.028    | 0.078    | 0.38      | -0.111    | 0.123  |
| A006027_01 | -0.189    | 0.284    | -0.235    | -0.234    | 0.096    | 0.395     | -0.302    | 0.167  |
| A006030_01 | 0.224     | 0.549    | 0.042     | 0.054     | 0.589    | 0.917     | 0.344     | 0.551  |
| A006032_01 | 0.084     | 0.292    | 0.199     | 0.252     | 0.202    | 0.277     | -0.207    | -0.109 |
| A006033_01 | -0.203    | 0.025    | -0.307    | 0.039     | 0.032    | 0.302     | 0.223     | 0.305  |
| A006034_01 | -0.218    | -0.171   | 0.106     | 0.024     | -0.012   | 0.01      | 0.037     | 0.107  |
| A006035_01 | -0.114 NA |          | 0.28      | 0.439     | 0.406    | 0.517     | 0.035     | 0.125  |
| A006036_01 | 0.274 NA  |          | -0.126    | 0.058 NA  |          | 0.004 NA  |           | 0.013  |
| A006039_01 | 0.52      | 0.605 NA | NA        |           | 0.451    | 0.62 NA   |           | 0.469  |

|            |           |        |           |          |        |           |           |        |
|------------|-----------|--------|-----------|----------|--------|-----------|-----------|--------|
| A006040_01 | -0.166    | -0.408 | 0.165     | 0.242    | 0.044  | -0.057    | 0.081     | -0.054 |
| A006041_01 | -0.526    | -0.759 | -0.566    | -0.224   | -0.696 | -0.731 NA |           | -0.079 |
| A006042_01 | -0.033    | -0.119 | -0.166    | -0.259   | 0.172  | 0.214     | 0.028     | 0.001  |
| A006043_01 | -0.148    | 0.101  | 0.051     | 0.13     | 0.061  | 0.402     | -0.313    | -0.138 |
| A006045_01 | -0.095    | -0.066 | -0.196    | 0.114    | -0.186 | -0.119    | 0.037     | 0.1    |
| A006046_01 | 0.51      | 0.791  | 0.145     | 0.362    | 0.353  | 0.578     | 0.195     | 0.43   |
| A006048_01 | -0.035    | 0.148  | 0.053     | -0.084   | 0.275  | 0.406     | 0.001     | 0.255  |
| A006049_01 | -2.225    | -1.241 | -1.346    | -1.027   | -3.026 | -3.52     | -1.44     | -1.69  |
| A006050_01 | -0.014    | -0.024 | -0.059    | -0.151   | 0.463  | 0.551     | 0.265     | 0.261  |
| A006051_01 | -0.153    | 0.033  | 0.159     | 0.361    | -1.213 | -1.256    | -0.334    | -0.245 |
| A006052_01 | -0.577    | -0.462 | 0.262     | 0.306    | -0.081 | 0.096     | -0.609    | -0.219 |
| A006055_01 | -0.008    | -0.034 | -0.239    | -0.116   | -0.264 | -0.182    | -0.039    | 0.016  |
| A006056_01 | 0.187     | 0.29   | 0.22      | -0.029   | 0.355  | 0.293     | -0.311    | -0.347 |
| A006058_01 | -0.093 NA |        | 0.048     | 0.12     | 0.082  | -0.229    | 0.171     | -0.146 |
| A006059_01 | -0.2      | -0.199 | -0.192    | 0.051    | 0.003  | 0.095     | 0.217     | 0.28   |
| A006060_01 | 0.037     | 0.104  | 0.159     | -0.009   | 0.145  | 0.083     | -0.108    | -0.057 |
| A006063_01 | -0.443    | -0.138 | -1.722    | -1.489   | -1.593 | -1.717    | -1.291    | -1.305 |
| A006066_01 | -0.086 NA |        | -0.433    | -0.068   | 0.098  | 0.134 NA  |           | 0.083  |
| A006068_01 | 0.283     | -0.04  | -0.443    | -0.43    | 0.142  | 0.149     | 0.059     | -0.027 |
| A006070_01 | -1.015    | -0.889 | -0.525 NA |          | -1.159 | -1.241 NA | NA        | NA     |
| A006073_01 | 0.638     | 0.459  | 0.083     | 0.385    | 0.303  | 0.364 NA  | NA        | NA     |
| A006077_01 | 0.168 NA  |        | 0.13      | 0.324 NA |        | 0.042 NA  |           | -0.071 |
| A006078_01 | -0.171    | -0.256 | 0.08      | 0.113    | -0.223 | -0.299    | -0.114    | -0.122 |
| A006079_01 | -0.277    | -0.177 | -0.407    | -0.207   | -0.187 | -0.14     | 0.028     | -0.059 |
| A006082_01 | -0.176    | -0.396 | -0.065    | -0.031   | -0.443 | -0.302    | 0.104     | 0.155  |
| A006085_01 | 0.442     | 0.446  | 0.292     | 0.292    | 0.224  | 0.15      | -0.384 NA |        |
| A006087_01 | 0.594     | 0.663  | -0.099    | 0.001    | -2.453 | -3.267    | -0.239    | -0.056 |
| A006089_01 | -0.379    | -0.251 | -0.286    | -0.156   | 0.061  | 0.234     | 0.41      | 0.358  |
| A006090_01 | -3.305    | -2.398 | -3.051    | -2.711   | -3.983 | -4.198 NA | NA        | NA     |
| A006092_01 | 0.052 NA  |        | 0.424     | 0.245 NA | NA     | NA        |           | -0.056 |
| A006095_01 | 0.169     | 0.134  | 0.012     | 0.068    | -0.563 | -0.663 NA |           | 0.095  |
| A006096_01 | 0.088     | 0.006  | 0.08      | 0.287    | 0.107  | 0.152     | -0.05     | -0.201 |
| A006099_01 | 0.38      | 0.349  | -0.095    | 0.033    | 0.04   | -0.147    | -0.085    | -0.14  |
| A006100_01 | -0.512    | -0.398 | -0.898    | -0.725   | -1.66  | -1.834    | -0.558    | -0.424 |
| A006101_01 | -0.051    | 0.214  | -0.271    | -0.006   | 0.119  | 0.449     | 0.367     | 0.578  |
| A006102_01 | 0.143 NA  | NA     |           | 0.177    | 0.474  | 0.527 NA  | NA        | NA     |
| A006104_01 | 0.62      | 0.282  | 0.483     | 0.35     | -0.758 | -0.918    | 0.598     | 0.483  |
| A006105_01 | 0.516     | 0.358  | -0.035    | 0.079    | 0.431  | 0.256     | 0.085     | 0.146  |
| A006110_01 | -0.192    | -0.077 | -0.06     | 0.06     | 0.149  | 0.381     | 0.263     | 0.237  |
| A006118_01 | 0.182     | 0.148  | 0.008     | 0.085    | -0.019 | -0.001    | 0.02      | 0.063  |
| A006119_01 | 0.162     | 0.132  | -0.261    | 0.003    | 0.01   | -0.062    | 0.178     | 0.176  |
| A006123_01 | 0.331     | 0.145  | -0.043    | 0.124    | 0.051  | -0.081    | 0.153     | 0.01   |
| A006124_01 | 0.078     | 0.188  | 0.138     | 0.222    | 0.286  | 0.356     | -0.082    | 0.095  |
| A006125_01 | -0.279    | -0.367 | 0.074     | -0.052   | -0.162 | -0.37     | 0.001     | -0.083 |
| A006126_01 | -0.823    | -0.939 | 0.045     | 0.402    | 0.367  | 0.622     | -0.106    | -0.05  |
| A006132_01 | -0.016    | 0.03   | -0.097    | -0.218   | 0.155  | 0.12 NA   | NA        | NA     |
| A006136_01 | -0.231 NA | NA     |           | -0.089   | -0.3   | -0.249 NA | NA        | NA     |
| A006138_01 | -0.142    | -0.052 | -0.008    | -0.106   | 0.097  | -0.008    | 0.215     | 0.133  |
| A006143_01 | -0.136    | -0.124 | -0.067    | -0.082   | -0.165 | 0.346     | -0.1      | -0.041 |
| A006146_01 | 0.098     | -0.049 | -0.018    | -0.109   | 0.192  | 0.145     | 0.114     | 0.065  |
| A006152_01 | 0.116     | 0.067  | 0.019     | -0.096   | 0.18   | 0.015     | 0.081     | -0.061 |
| A006159_01 | -0.031    | 0.124  | -0.024    | 0.109    | -0.075 | 0.044     | 0.303     | 0.427  |
| A006163_01 | -0.378    | -0.319 | 0.084     | 0.008    | -0.148 | -0.1      | -0.112    | -0.079 |
| A006164_01 | 0.045     | -0.087 | -0.019    | 0.285    | -0.241 | -0.078    | 0.076     | 0.004  |
| A006168_01 | 0.143     | -0.183 | -0.089    | 0.023    | -0.236 | -0.247    | -0.086    | -0.214 |
| A006169_01 | -0.538    | -0.036 | 0.37      | 0.26     | 0.498  | 0.714     | -0.043    | 0.181  |
| A006172_01 | 0.211 NA  | NA     | NA        |          | 0.172  | 0.065 NA  | NA        | NA     |
| A006173_01 | 0.02 NA   | NA     |           | -0.162   | 0.121  | -0.101 NA | NA        | NA     |
| A006175_01 | -0.089    | 0.021  | -0.207    | 0.005    | 0.083  | 0.351     | 0.136     | 0.127  |
| A006177_01 | 0.164 NA  |        | -0.04     | 0.087 NA | NA     | NA        | NA        | NA     |
| A006178_01 | 0.154     | -0.065 | -0.049    | -0.146   | 0.302  | 0.334     | -0.001    | -0.027 |
| A006181_01 | -0.316    | -0.27  | 0.042     | -0.095   | -1.187 | -1.646    | -0.455    | -0.578 |
| A006182_01 | -0.043    | 0.002  | 0.099     | 0.213    | 0.115  | 0.187     | 0.137     | 0.181  |
| A006185_01 | 0.22      | 0.235  | 0.041     | 0.09     | 0.427  | 0.435     | 0.09      | 0.282  |
| A006189_01 | -0.06     | -0.051 | -0.338    | -0.311   | -0.033 | -0.209    | -0.045    | -0.055 |
| A006191_01 | 0.017     | 0.187  | 0.141     | 0.037    | -0.088 | -0.277    | -0.058    | -0.115 |
| A006193_01 | 0.346     | -0.016 | -0.088    | -0.079   | 0.15   | -0.025 NA |           | -0.058 |
| A006195_01 | -0.352    | -0.154 | -0.004    | 0.121    | -0.016 | 0.195     | 0.361     | 0.673  |

|            |           |           |           |           |        |           |           |        |
|------------|-----------|-----------|-----------|-----------|--------|-----------|-----------|--------|
| A006197_01 | -1.076    | -0.648    | -0.422    | -0.208    | -0.029 | 0.283 NA  | NA        |        |
| A006199_01 | 0.287     | 0.309     | -0.013    | 0.011     | 0.09   | 0.275     | 0.116     | 0.149  |
| A006202_01 | -0.366    | -0.529    | -0.211    | -0.314    | -0.722 | -0.782    | -0.202    | -0.487 |
| A006203_01 | -0.097    | 0.061     | -0.289    | -0.123    | 0.013  | 0.108 NA  | NA        |        |
| A006211_01 | -0.039    | 0.188     | 0.002     | 0.033     | 0.33   | 0.462     | -0.138    | 0.127  |
| A006212_01 | -0.064    | -0.004    | -0.376    | -0.405    | -0.056 | -0.105    | 0.021     | 0.055  |
| A006214_01 | 0.482 NA  |           | -0.586    | -0.355 NA |        | 0.049     | 0.276     | 0.26   |
| A006219_01 | 0.241 NA  | NA        |           | 0.125 NA  |        | 0.16 NA   |           | 0.102  |
| A006220_01 | -0.052    | 0.104     | -0.252    | -0.131    | -0.181 | 0.053     | -0.134    | 0.209  |
| A006223_01 | 0.037 NA  |           | -0.019    | 0.16      | 0.169  | 0.029 NA  | NA        |        |
| A006226_01 | -0.541    | -0.393    | -0.171    | -0.092    | -0.798 | -0.901    | -0.209    | -0.04  |
| A006227_01 | -0.437    | -0.444    | -0.042    | 0.032     | -0.288 | -0.252    | -0.649 NA |        |
| A006231_01 | 0.095     | 0.175     | -0.235    | -0.049    | 0.155  | 0.054 NA  |           | 0.065  |
| A006233_01 | -0.541 NA |           | 0.137     | 0.085     | -0.566 | -0.467 NA | NA        |        |
| A006235_01 | 0.15      | 0.227     | -0.538    | -0.274    | 0.02   | 0.369     | 0.126     | 0.167  |
| A006239_01 | 0.189     | 0.243     | 0.145     | 0.391     | -0.585 | -0.486    | -0.175    | -0.22  |
| A006242_01 | 0.108 NA  |           | -0.148 NA | NA        |        | 0.003 NA  |           | -0.363 |
| A006243_01 | -0.031    | -0.247    | 0.072     | 0.349     | -0.597 | -0.614    | -0.064    | -0.261 |
| A006246_01 | 0.322     | 0.545     | 0.367     | 0.169     | 0.164  | 0.059     | -0.132    | -0.028 |
| A006251_01 | -0.467    | -0.449    | -0.258    | -0.389    | -0.191 | -0.198    | 0.066     | 0.272  |
| A006252_01 | -0.299    | -0.202    | 0.011     | 0.242     | -0.117 | -0.083    | 0.135     | 0.166  |
| A006253_01 | 0.369     | 0.257     | -0.11     | -0.005    | 0.058  | 0.052     | 0.172     | -0.075 |
| A006254_01 | -0.293    | 0.036     | 0.126     | 0.243     | -0.158 | -0.229    | -0.061    | 0.004  |
| A006257_01 | 0.172     | -0.022    | -0.28     | 0.052     | 0.114  | 0.328     | 0.099     | 0.125  |
| A006260_01 | 0.226     | 0.124     | -0.011    | -0.062    | 0.562  | 0.372     | 0.387     | 0.418  |
| A006261_01 | 0.041     | 0.026     | -0.079    | 0.056     | -0.058 | -0.034    | 0.083     | -0.088 |
| A006263_01 | 0.058     | 0.015     | -0.079    | -0.17     | -0.029 | 0.033     | -0.066    | -0.015 |
| A006264_01 | -0.772    | -0.562    | -0.135    | -0.102    | 0.734  | 1.005     | 0.045     | 0.115  |
| A006269_01 | 0.473     | 0.182     | -0.135    | -0.161    | 0.607  | 0.612     | 0.29      | 0.207  |
| A006273_01 | 0.435     | 0.478     | -0.151    | -0.034    | 0.396  | 0.405     | 0.202     | 0.202  |
| A006277_01 | 0.145 NA  |           | -0.035    | 0.036 NA  |        | -0.05 NA  | NA        |        |
| A006278_01 | 0.468 NA  |           | 0.274     | 0.233 NA  | NA     | NA        |           | -0.021 |
| A006282_01 | -0.314    | -0.231    | -0.154    | -0.086    | 0.208  | 0.414     | -0.416    | -0.312 |
| A006284_01 | -0.981    | -0.756    | 0.628     | 0.574     | 0.611  | 0.819 NA  | NA        |        |
| A006288_01 | -0.224    | 0.005     | -0.058    | 0.019     | -0.398 | -0.233 NA |           | 0.341  |
| A006291_01 | 0.281     | 0.905     | 0.408     | 0.289     | 0.588  | 0.714     | 0.188     | 0.453  |
| A006298_01 | -0.333 NA |           | -0.252    | 0.134     | 0.116  | 0.333 NA  |           | 0.095  |
| A006313_01 | 0.25      | 0.6       | -0.187    | -0.118    | 0.026  | 0.325 NA  |           | 0.24   |
| A006316_01 | -0.002 NA |           | -0.157    | 0.153 NA  |        | -0.049 NA | NA        |        |
| A006323_01 | -0.113    | 0.054     | 0.02      | 0.161     | 0.035  | 0.172     | -0.195    | -0.159 |
| A006324_01 | 0.018     | 0.143     | -0.073    | 0.051     | -0.001 | 0.008     | -0.004    | -0.046 |
| A006327_01 | 0.187     | 0.283     | -0.396    | -0.377    | 0.048  | -0.002 NA |           | 0.158  |
| A006329_01 | 0.057     | 0.114     | 0.086     | -0.018    | 0.075  | 0.045 NA  | NA        |        |
| A006330_01 | -0.148 NA |           | -0.109    | -0.042 NA |        | 0.111 NA  |           | 0.026  |
| A006331_01 | -0.01 NA  |           | -0.31     | -0.229    | 0.001  | 0.064 NA  |           | 0.137  |
| A006342_01 | 0.03 NA   |           | -0.032    | 0.042 NA  |        | 0.069     | 0.209     | 0.34   |
| A006345_01 | 0.084     | 0.079     | 0.414     | 0.446     | 0.1    | 0.249     | -0.461    | -0.28  |
| A006350_01 | -0.23     | -0.197    | -0.551    | -0.291    | 0.063  | 0.348     | 0.254     | 0.331  |
| A006351_01 | -0.112 NA |           | -0.047    | -0.215    | 0.133  | 0.21      | 0.159     | 0.357  |
| A006357_01 | 0.12      | 0.048     | -0.348    | -0.153    | 0.055  | 0.134     | 0.066     | 0.041  |
| A006373_01 | 0.071 NA  |           | -0.063    | -0.093    | -0.141 | -0.206    | 0.08      | 0.192  |
| A006374_01 | -0.381    | -0.187    | -0.225    | -0.071    | -0.021 | 0.365     | -0.11     | 0.311  |
| A006378_01 | 0.176 NA  |           | -0.106    | -0.093    | 0.038  | -0.045    | 0         | 0.043  |
| A006384_01 | -0.026    | 0.189     | 0.04      | -0.01     | 0.091  | 0.16      | -0.112    | 0.162  |
| A006385_01 | 0.072 NA  |           | -0.138    | 0.085     | -0.13  | -0.071 NA |           | 0.026  |
| A006387_01 | 0.529     | 0.324     | -0.023    | -0.071    | 0.594  | 0.637     | 0.151     | 0.16   |
| A006388_01 | -0.355    | -0.111 NA |           | -0.03     | -0.065 | -0.017    | -0.369    | -0.182 |
| A006389_01 | -0.082    | -0.029    | 0.08      | 0.047     | 0.831  | 1.01 NA   |           | 0.302  |
| A006400_01 | -0.197    | -0.327    | -0.088    | -0.022    | -0.193 | -0.209    | 0.065     | 0.204  |
| A006402_01 | -0.251    | -0.202    | -0.062    | -0.005    | -0.139 | -0.156    | -0.004    | -0.025 |
| A006419_01 | -0.279 NA |           | -0.043    | 0.088     | -0.382 | -0.206 NA | NA        |        |
| A006421_01 | 0.26      | 0.599     | 0.151     | 0.251     | -0.127 | -0.277    | -0.017    | 0.096  |
| A006422_01 | 0.071 NA  |           | -0.498    | -0.312 NA | NA     |           | 0.039     | 0.129  |
| A006429_01 | NA        | NA        | -0.4 NA   | NA        |        | 0.389 NA  | NA        |        |
| A006432_01 | 0.105 NA  |           | -0.031    | 0.06      | -0.265 | -0.423    | -0.049    | 0.011  |
| A006436_01 | 0.128     | 0.007     | -0.305    | -0.328    | -0.058 | -0.117    | 0.218     | 0.248  |
| A006441_01 | -0.615 NA |           | -1.41     | -1.268    | -0.348 | 0.086     | -0.506    | -0.417 |
| A006442_01 | -0.292    | 0.127     | -0.139    | 0.164     | -0.039 | 0.021     | 0.026     | 0.216  |

|            |           |         |           |           |        |           |           |        |
|------------|-----------|---------|-----------|-----------|--------|-----------|-----------|--------|
| A006451_01 | -0.101    | 0.071   | -0.124    | -0.142    | 0.188  | 0.248     | -0.334    | 0.023  |
| A006453_01 | 0.063     | 0.108   | -0.257    | -0.197    | 0.203  | 0.446     | 0.031     | 0.179  |
| A006456_01 | -0.537    | -0.306  | -0.278 NA |           | 0.923  | 1.323 NA  |           | -0.53  |
| A006491_01 | 0.275     | 0.169   | -0.149    | 0.163     | -0.156 | -0.274 NA | NA        |        |
| A006523_01 | -0.233    | -0.074  | -0.006    | -0.149    | -0.088 | 0.171     | 0.031     | 0.324  |
| A006529_01 | 0.234 NA  |         | 0.048     | 0.117 NA  |        | -0.074 NA | NA        |        |
| A006550_01 | 0.089     | 0.181   | -0.034    | 0.182     | 0.143  | 0.266     | -0.034    | -0.203 |
| A006556_01 | -0.069    | -0.14   | 0.246     | 0.292     | -0.087 | -0.049    | -0.319    | -0.084 |
| A006564_01 | 0.113     | -0.035  | -0.229    | 0.087     | -0.026 | 0.192     | 0.005     | 0.12   |
| A006565_01 | 0.2       | 0.218   | -0.335    | -0.215    | 0.013  | 0.294     | 0.019     | 0.383  |
| A006567_01 | -0.387    | -0.102  | -0.457    | -0.228    | 0.088  | 0.44      | 0.056     | 0.215  |
| A006568_01 | 0.131     | 0.247   | -0.048    | -0.117    | 0.2    | 0.195     | -0.016    | 0.058  |
| A006569_01 | 0.208     | 0.004   | -0.195    | -0.053    | -0.039 | -0.093    | -0.092    | -0.101 |
| A006573_01 | -0.243    | 0.02    | -0.134    | -0.122    | -0.064 | 0.304     | -0.082    | 0.456  |
| A006574_01 | -0.264    | 0.128   | -0.019    | -0.187    | 0.032  | 0.355 NA  |           | 0.546  |
| A006575_01 | -0.049    | 0.094   | -0.173    | 0.035     | 0.169  | 0.376     | 0.091     | 0.357  |
| A006579_01 | 0.193     | -0.077  | -0.161    | -0.234    | -0.269 | -0.57     | 0.033     | -0.265 |
| A006580_01 | 0.035     | 0.055   | -0.04     | -0.08     | 0.014  | 0.057     | -0.168    | -0.193 |
| A006581_01 | 0.66      | 0.328   | -0.267    | -0.147    | 0.194  | 0.222     | 0.01      | -0.195 |
| A006585_01 | -0.318    | 0.282   | 0.004     | -0.134    | 0.121  | 0.647     | -0.163    | 0.653  |
| A006586_01 | -0.204    | 0.086   | -0.13     | -0.082    | -0.144 | 0.254     | -0.152    | 0.336  |
| A006595_01 | 0.081     | 0.28    | 0.014     | 0.114     | 0.293  | 0.413 NA  | NA        |        |
| A006596_01 | -1.575    | -0.998  | 0.539     | 0.481     | -0.152 | 0.413     | -0.691    | -0.099 |
| A006597_01 | -1.012    | -0.477  | 0.196     | 0.192     | -0.077 | 0.522 NA  |           | 0.371  |
| A006598_01 | -0.547 NA |         | -0.041 NA |           | -0.027 | 0.398 NA  |           | 0.469  |
| A006603_01 | 0.068     | 0.135   | -0.043    | 0.103     | -0.222 | -0.315    | -0.169    | -0.044 |
| A006610_01 | -0.034    | -0.016  | -0.04     | -0.066    | -0.371 | -0.543    | 0.342     | 0.262  |
| A006611_01 | 0.235     | 0.253   | -0.206    | 0.108     | 0.189  | 0.237     | 0.244     | 0.255  |
| A006619_01 | 0.19      | 0.095   | -0.067    | 0.122     | -0.091 | -0.191    | -0.081    | -0.16  |
| A006622_01 | -0.031    | 0.152   | -0.145    | -0.222    | 0.67   | 1.082     | 0.445     | 0.541  |
| A006637_01 | -0.321    | -0.247  | -0.205    | -0.154    | -0.31  | -0.096    | -0.784 NA |        |
| A006660_01 | 0.001 NA  |         | -0.133    | -0.131    | -0.007 | 0.183 NA  | NA        |        |
| A006664_01 | 0.158     | 0.287   | -0.066    | 0.154     | 0.119  | 0.212     | -0.24     | 0.165  |
| A006665_01 | 0.029     | 0.027   | -0.012    | -0.042    | -0.374 | -0.698    | 0.001     | -0.179 |
| A006674_01 | -0.086 NA | NA      |           | -0.032 NA |        | 0.244 NA  |           | 0.012  |
| A006676_01 | 0.063 NA  |         | -0.229    | -0.096 NA |        | -0.255    | -0.281    | -0.078 |
| A006681_01 | 0.018     | 0.05 NA |           | -0.063    | 0.517  | 0.538     | 0.115     | 0.151  |
| A006684_01 | -0.417    | -0.449  | 0.043     | 0.024     | -0.149 | -0.064    | -0.145    | -0.074 |
| A006688_01 | 0.138     | 0.26    | 0.113     | 0.042     | -0.307 | -0.38     | 0.2       | 0.35   |
| A006689_01 | -0.344    | -0.067  | -0.206    | -0.013    | -0.086 | 0.148     | -0.02     | 0.158  |
| A006692_01 | 0.291     | 0.029   | 0.01      | 0.009     | 0.147  | 0.039     | 0.075     | 0.01   |
| A006694_01 | -0.031 NA |         | -0.286    | -0.184    | 0.046  | -0.034    | 0.067     | 0.041  |
| A006696_01 | 0.16      | 0.113   | -0.04     | -0.167    | 0.11   | 0.052 NA  |           | -0.02  |
| A006708_01 | 0.444     | 0.37    | -0.157    | -0.164    | -0.229 | -0.34     | 0.042     | 0.057  |
| A006710_01 | 0.171     | 0.339   | -0.468    | -0.34     | 0.152  | 0.332     | -0.001    | 0.098  |
| A006715_01 | 0.093     | -0.046  | -0.054    | -0.089    | -0.068 | -0.211    | -0.042    | -0.174 |
| A006716_01 | -0.663    | -0.634  | 0.248     | 0.124     | -1.335 | -1.612    | -0.798    | -0.948 |
| A006724_01 | -0.011    | 0.097   | -0.752    | -0.562    | -0.045 | -0.204    | -0.254    | -0.302 |
| A006726_01 | -0.728    | -0.352  | 0.012     | -0.111    | -0.876 | -0.857    | -0.451    | -0.475 |
| A006730_01 | 0.331     | 0.431   | 0.25      | 0.128     | -1.119 | -1.25     | 0.07      | 0.338  |
| A006733_01 | 0.04      | -0.022  | -0.095    | -0.315    | 0.448  | 0.461     | 0.005     | -0.158 |
| A006735_01 | 0.354 NA  | NA      | NA        |           | -0.03  | 0.101 NA  |           | -0.017 |
| A006736_01 | 0.967     | 1.276   | -0.183    | -0.101    | 0.904  | 0.893     | 0.249     | 0.408  |
| A006737_01 | -0.027    | -0.074  | 0.016     | 0.114     | -0.179 | -0.394    | -0.017    | -0.055 |
| A006738_01 | 0.147     | 0.228   | 0.348     | 0.164     | 0.561  | 0.787     | 0.061     | 0.166  |
| A006742_01 | -0.049 NA |         | -0.164    | -0.057    | -0.417 | -0.33     | 0.131     | 0.126  |
| A006744_01 | 0.201     | 0.248   | -0.006    | -0.085    | 0.145  | 0.093     | -0.09     | -0.089 |
| A006748_01 | -0.014    | -0.057  | -0.018    | -0.061    | 0.362  | 0.352     | 0.045     | -0.005 |
| A006754_01 | -0.251    | 0.039   | 0.085     | 0.142     | 0.484  | 0.675     | 0.203     | 0.365  |
| A006755_01 | 0.037 NA  |         | 0.165     | 0.125 NA  |        | -0.094 NA | NA        |        |
| A006761_01 | -0.071    | 0.19    | 0.29      | 0.361     | 0.4    | 0.707     | -0.196    | 0.107  |
| A006763_01 | NA        | NA      | 0.078     | 0.038 NA  |        | 0.154 NA  |           | 0.066  |
| A006769_01 | 0.238     | -0.183  | -0.173    | -0.153    | -0.063 | -0.053    | -0.18     | -0.146 |
| A006771_01 | 0.178     | 0.379   | -0.637    | -0.339    | 0.145  | 0.307     | 0         | 0.257  |
| A006781_01 | -0.145    | -0.147  | -0.064    | 0.101     | -0.7   | -0.702    | 0.086     | 0.1    |
| A006787_01 | 0.113 NA  |         | 0.094     | 0.342     | 0.187  | 0.115     | 0.277     | 0.132  |
| A006789_01 | -0.001 NA |         | 0.366     | 0.396     | 0.752  | 0.734 NA  |           | 0.1    |
| A006790_01 | -0.168 NA |         | 0.113     | 0.104 NA  |        | -0.116 NA |           | 0.054  |



|            |        |        |        |        |        |        |        |        |
|------------|--------|--------|--------|--------|--------|--------|--------|--------|
| A006794_01 | 0.038  | 0.01   | -0.18  | 0.049  | -0.136 | -0.096 | NA     | 0.141  |
| A006797_01 | 0.023  | 0.063  | -0.252 | -0.024 | -0.182 | -0.301 | -0.073 | -0.146 |
| A006799_01 | 0.483  | 0.313  | -0.024 | 0.022  | 0.409  | 0.485  | 0.149  | 0.253  |
| A006800_01 | 0.27   | NA     | -0.051 | 0.206  | NA     | 0.197  | 0.065  | -0.051 |
| A006802_01 | -1.011 | -1.282 | 1.235  | 1.286  | 1.61   | 2.106  | 0.669  | 0.741  |
| A006803_01 | 0.032  | 0.263  | 0.043  | 0.059  | 0.116  | 0.015  | -0.047 | 0.007  |
| A006804_01 | 0.168  | 0.198  | -0.006 | -0.091 | 0.078  | 0.157  | -0.004 | 0.224  |
| A006805_01 | -0.212 | 0.06   | -0.014 | -0.088 | -0.113 | 0.111  | -0.192 | -0.014 |
| A006806_01 | 0.31   | 0.151  | -0.107 | 0.104  | 0.254  | 0.311  | 0.031  | -0.076 |
| A006808_01 | 0.075  | 0.167  | -0.039 | 0.114  | 0.143  | 0.306  | -0.496 | -0.401 |
| A006809_01 | -0.252 | -0.166 | -0.304 | NA     | -0.117 | -0.043 | NA     | NA     |
| A006811_01 | 0.156  | 0.201  | -0.093 | -0.023 | 0.338  | 0.348  | -0.215 | -0.172 |
| A006815_01 | 0.06   | -0.099 | 0.001  | 0.109  | 0.121  | 0.045  | 0.006  | -0.161 |
| A006816_01 | -0.461 | -0.159 | -0.021 | -0.071 | -0.141 | -0.048 | -0.209 | -0.114 |
| A006817_01 | 0.113  | 0.238  | -0.169 | -0.034 | 0.137  | 0.353  | -0.091 | 0.115  |
| A006819_01 | -0.039 | -0.056 | -0.063 | -0.011 | 0.375  | 0.516  | 0.134  | 0.222  |
| A006821_01 | -0.062 | -0.14  | -0.24  | -0.208 | -0.182 | -0.18  | 0.042  | 0.074  |
| A006822_01 | 0.261  | 0.209  | 0.049  | 0.205  | 0.31   | 0.576  | 0.11   | NA     |
| A006824_01 | -0.926 | -0.755 | -1.219 | -1.013 | -1.863 | -2.677 | -1.022 | -1.215 |
| A006826_01 | -0.704 | -0.3   | -0.297 | -0.249 | -0.197 | -0.031 | -0.537 | -0.273 |
| A006827_01 | 0.134  | 0.02   | 0.407  | 0.272  | 0.317  | 0.272  | -0.231 | -0.175 |
| A006828_01 | -0.177 | 0.047  | -0.29  | -0.021 | 0.119  | 0.161  | NA     | NA     |
| A006829_01 | 0.407  | 0.324  | -0.026 | -0.05  | 0.52   | 0.525  | 0.084  | 0.002  |
| A006830_01 | -0.207 | 0.115  | -0.74  | NA     | 0.128  | 0.329  | NA     | 0.428  |
| A006831_01 | 0.035  | 0.18   | NA     | NA     | -0.148 | -0.142 | NA     | 0.099  |
| A006832_01 | 0.051  | 0.047  | 0      | 0.063  | -0.046 | 0.003  | 0.19   | 0.228  |
| A006847_01 | -0.737 | -0.966 | -0.536 | -0.385 | -1.277 | -1.2   | -1.404 | -1.153 |
| A006849_01 | 0.195  | 0.22   | -0.422 | -0.221 | -0.245 | -0.212 | -0.704 | -0.398 |
| A006850_01 | 0.117  | 0.102  | -0.215 | 0.226  | -0.087 | 0.301  | NA     | NA     |
| A006852_01 | 0.021  | NA     | 0.314  | 0.204  | 0.159  | 0.055  | NA     | -0.098 |
| A006854_01 | -0.019 | -0.048 | -0.118 | 0.014  | 0.461  | 0.561  | 0.229  | 0.04   |
| A006857_01 | 0.003  | 0.008  | -0.358 | -0.047 | -0.273 | -0.186 | 0.059  | NA     |
| A006864_01 | 0.039  | 0.054  | -0.239 | -0.087 | -0.174 | 0.094  | -0.156 | 0.106  |
| A006867_01 | -0.03  | -0.031 | -0.178 | 0.028  | 0.201  | 0.34   | 0.139  | 0.031  |
| A006868_01 | 0.225  | 0.457  | -0.46  | 0.038  | 0.234  | 0.672  | NA     | NA     |
| A006869_01 | 0.073  | -0.094 | 0.249  | 0.074  | 0.315  | 0.231  | 0.043  | 0.053  |
| A006871_01 | -0.017 | 0.171  | -0.143 | -0.126 | -0.017 | 0.066  | -0.064 | 0.011  |
| A006876_01 | 0.018  | 0.228  | -0.034 | 0.032  | 0.072  | 0.199  | -0.026 | 0.085  |
| A006880_01 | -0.235 | -0.294 | 0.177  | 0.05   | -0.243 | -0.37  | -0.172 | -0.003 |
| A006882_01 | -0.243 | 0.014  | -0.373 | -0.253 | -0.11  | -0.183 | 0.167  | 0.183  |
| A006885_01 | 0.229  | 0.416  | -0.471 | -0.265 | 0.04   | 0.108  | -0.002 | 0.06   |
| A006890_01 | 0.149  | NA     | 0.109  | 0.078  | 0.166  | 0.034  | -0.063 | -0.154 |
| A006893_01 | -0.022 | 0.212  | -0.012 | 0.094  | -0.141 | -0.024 | -0.192 | -0.125 |
| A006896_01 | 0.074  | 0.095  | 0.02   | 0.144  | -0.436 | -0.399 | -0.152 | -0.003 |
| A006897_01 | 0.294  | 0.429  | 0.58   | 0.399  | 1.029  | 1.139  | 0.146  | 0.3    |
| A006907_01 | 0.253  | 0.291  | -0.187 | -0.089 | 0.047  | -0.043 | 0.238  | 0.235  |
| A006913_01 | 0.221  | 0.751  | -0.003 | -0.039 | 0.492  | 0.531  | -1.446 | -1.025 |
| A006918_01 | 0.044  | 0.121  | 0.077  | 0.032  | 0.033  | -0.075 | 0.017  | -0.024 |
| A006919_01 | 0.088  | 0.117  | -0.587 | -0.598 | -0.317 | -0.194 | -0.345 | -0.135 |
| A006924_01 | 0.203  | NA     | -0.605 | NA     | -0.192 | -0.189 | NA     | 0.292  |
| A006928_01 | 0.094  | 0.211  | 0.26   | 0.524  | -0.536 | -0.37  | NA     | NA     |
| A006935_01 | 0.155  | 0.277  | 0.186  | 0.349  | -0.834 | -0.963 | NA     | NA     |
| A006937_01 | 0.154  | 0.088  | -0.443 | -0.189 | 0.148  | 0.114  | 0.229  | 0.305  |
| A006944_01 | 0.197  | 0.402  | 0.183  | 0.049  | 0.774  | 0.934  | -0.058 | 0.245  |
| A006948_01 | -0.085 | -0.15  | 0.056  | -0.025 | -0.062 | -0.154 | -0.098 | -0.144 |
| A006949_01 | 0.005  | NA     | -0.308 | 0.014  | -0.505 | -0.307 | -0.229 | -0.139 |
| A006954_01 | 0.024  | 0.337  | 0.099  | 0.127  | 0.449  | 0.402  | -0.062 | 0.151  |
| A006959_01 | NA     | NA     | 0.301  | 0.298  | -0.014 | 0.008  | -0.245 | -0.049 |
| A006971_01 | -0.12  | NA     | 0.101  | 0.059  | NA     | NA     | NA     | -0.189 |
| A006972_01 | -0.533 | NA     | -0.004 | 0.198  | -0.46  | -0.404 | 0.101  | 0.045  |
| A006974_01 | 0.294  | NA     | -0.047 | 0.15   | 0.065  | 0.158  | NA     | NA     |
| A006975_01 | 0.265  | 0.599  | -0.619 | -0.648 | 0.059  | 0.233  | -0.127 | 0.051  |
| A006984_01 | -0.059 | -0.162 | -0.185 | -0.23  | -0.445 | -0.636 | 0.093  | 0.016  |
| A006988_01 | -0.414 | -0.266 | -0.008 | -0.097 | -0.274 | -0.328 | -0.062 | 0.11   |
| A006992_01 | 0.134  | 0.083  | 0.126  | 0.132  | -0.056 | -0.393 | -0.097 | -0.108 |
| A007000_01 | 0.181  | 0.284  | -0.23  | -0.141 | 0.37   | 0.527  | 0.09   | 0.102  |
| A007002_01 | -0.154 | NA     | -0.188 | 0.278  | -0.065 | 0.089  | NA     | -0.215 |
| A007010_01 | 0.049  | 0.069  | -0.299 | NA     | 0.08   | 0.249  | NA     | NA     |

|            |    |           |        |           |           |          |           |          |        |
|------------|----|-----------|--------|-----------|-----------|----------|-----------|----------|--------|
| A007017_01 |    | 0.437     | 0.151  | -0.185    | -0.064    | 0.36     | 0.377 NA  | NA       |        |
| A007021_01 |    | -0.218    | -0.165 | -0.07     | -0.089    | -0.376   | -0.307    | 0.138    | 0.19   |
| A007023_01 |    | -0.037    | 0.06   | -0.039    | 0.227     | -0.451   | -0.441    | 0.014    | -0.121 |
| A007045_01 |    | 0.394 NA  |        | -0.13 NA  |           | 0.184    | 0.193 NA  | NA       |        |
| A007051_01 |    | -1.167 NA |        | -0.062 NA |           | -0.714   | -0.766 NA | NA       |        |
| A007052_01 |    | 0.138     | 0.326  | -0.016    | -0.231    | 0.414    | 0.468 NA  | NA       |        |
| A007054_01 |    | -0.087    | -0.042 | 0.292     | 0.411     | -0.608   | -0.866    | -0.211   | -0.269 |
| A007058_01 |    | 0.617     | 0.558  | 0.261     | 0.423     | 0.37     | 0.613     | 0.148    | 0.015  |
| A007061_01 |    | -0.564    | -0.602 | -0.344    | -0.312    | -0.483   | -0.407    | -0.414   | -0.325 |
| A007062_01 |    | -0.055 NA |        | 0.043     | -0.101 NA |          | 0.04      | 0.174    | -0.003 |
| A007064_01 |    | -0.244    | -0.267 | 0.178     | 0.268     | -0.191   | -0.258    | -0.125   | 0.019  |
| A007067_01 |    | -0.172    | -0.136 | -0.338    | -0.385    | -0.064   | -0.065    | 0.082    | 0.262  |
| A007073_01 |    | -0.364    | -0.417 | -0.103    | 0.001     | -0.419   | -0.394    | -0.148   | -0.181 |
| A007075_01 |    | 0.36      | 0.28   | -0.131    | -0.106    | 0.572    | 0.585     | 0.471    | 0.439  |
| A007087_01 |    | 0.298 NA  |        | 0.09      | 0.152 NA  |          | 0.257     | 0.334    | 0.047  |
| A007090_01 |    | 0.019     | 0.213  | -0.115    | 0.019     | 0.203    | 0.298     | 0.019    | 0.12   |
| A007093_01 |    | 0.112     | 0.071  | -0.094    | -0.036    | 0.195    | 0.102     | 0.206    | 0.178  |
| A007098_01 |    | 0.092 NA  |        | 0.003 NA  |           | 0.015    | 0.037 NA  | NA       |        |
| A007103_01 |    | 0.015     | 0.023  | -0.334    | -0.17     | -0.039   | -0.029    | 0.088    | 0.209  |
| A007112_01 |    | 0.352     | 0.189  | -0.112    | -0.037    | 0.154    | 0.135     | 0.067    | -0.064 |
| A007117_01 |    | 0.133     | 0.148  | -0.017    | 0.273     | -0.29    | -0.33 NA  |          | 0.001  |
| A007119_01 |    | 0.147     | 0.322  | 0.229     | 0.332     | 0.15     | 0.463     | 0.138    | 0.062  |
| A007130_01 |    | -0.032    | -0.077 | 0.208     | 0.233     | 0.229    | 0.192     | 0.012    | -0.089 |
| A007131_01 | NA | NA        |        | 0.031     | 0.023 NA  | NA       | NA        |          | -0.077 |
| A007132_01 |    | -0.085 NA |        | -0.283    | -0.144 NA | NA       |           | 0.119    | 0.159  |
| A007142_01 |    | -0.41     | -0.232 | -0.048    | 0.054     | -0.041   | 0.019     | 0.13     | 0.215  |
| A007148_01 |    | -0.225    | 0.066  | -0.054    | -0.055    | 0.464    | 0.623     | -0.013   | 0.116  |
| A007152_01 |    | -0.179 NA |        | -0.239    | -0.073 NA |          | -0.482 NA |          | 0.051  |
| A007153_01 |    | -0.026    | -0.134 | -0.23     | -0.149    | 0.062    | 0.016     | 0.04     | -0.074 |
| A007158_01 |    | 0.129 NA  |        | -0.13     | 0.058 NA  |          | -0.056 NA |          | 0.045  |
| A007167_01 |    | 0.216     | 0.197  | -0.191    | -0.025    | -0.008   | 0.05      | -0.172   | -0.217 |
| A007169_01 |    | 0.138     | -0.177 | -0.128    | -0.202    | -0.106   | -0.266 NA |          | -0.137 |
| A007170_01 |    | -0.037 NA |        | 0.059     | -0.284    | 0.272    | 0.177     | 0.046    | 0.098  |
| A007173_01 |    | 0.153     | -0.088 | -0.148    | 0.048     | 0.006    | -0.098    | 0.149    | -0.144 |
| A007183_01 |    | 0.069     | -0.076 | 0.045     | 0.08      | -0.076   | -0.287    | 0.071    | 0.029  |
| A007211_01 |    | 0.23      | 0.277  | -0.046    | -0.224    | 0.371    | 0.316     | -0.135   | -0.149 |
| A007218_01 |    | -0.86 NA  |        | -0.105 NA |           | -0.907   | -0.583 NA | NA       |        |
| A007219_01 |    | -0.251    | -0.03  | 0.358     | 0.345     | -0.548   | -0.609    | -0.188   | -0.177 |
| A007221_01 |    | 0.253     | 0.032  | 0.209     | 0.15      | 0.32     | 0.234     | -0.199   | -0.341 |
| A007222_01 |    | 0.112     | 0.139  | -0.14     | -0.252    | -0.199   | -0.186    | 0.089    | 0.158  |
| A007225_01 |    | -0.285    | -0.305 | 0.185     | -0.035    | 0.211    | 0.229     | 0.185    | 0.136  |
| A007228_01 |    | 0.042     | -0.021 | 0.111     | 0.021     | -0.025   | -0.218    | -0.323   | -0.035 |
| A007234_01 |    | -0.342    | -0.201 | -0.12     | -0.104    | -0.119   | 0.044     | -0.138   | -0.021 |
| A007242_01 |    | 0.132     | -0.088 | -0.031    | -0.025    | 0.099    | 0.068 NA  | NA       |        |
| A007243_01 |    | 0.031     | -0.146 | 0.307     | 0.277     | 0.517    | 0.515     | 0.076 NA |        |
| A007245_01 |    | 0.028     | -0.308 | 0.146     | 0.003     | -0.415   | -0.936 NA |          | -0.072 |
| A007246_01 |    | -0.928    | -0.752 | -1.598    | -1.411    | -1.554   | -2.254    | -0.466   | -0.77  |
| A007250_01 |    | 0.068 NA  |        | 0.119     | 0.179     | 0.254    | 0.204     | 0.243    | 0.109  |
| A007251_01 |    | -0.485 NA |        | 0.196     | 0.276     | 0.518    | 0.723     | 0.181    | 0.156  |
| A007252_01 |    | -0.198    | 0.164  | 0.226     | 0.113     | -0.446   | -0.431    | 0.015    | 0.205  |
| A007255_01 |    | -0.052    | 0.038  | 0.285     | 0.143     | 0.046    | 0.199     | 0.095 NA |        |
| A007256_01 |    | 0.539 NA  |        | 0.105     | -0.032 NA |          | -0.565 NA |          | -0.411 |
| A007258_01 |    | 0.04      | 0.214  | -0.056    | -0.079    | 0.025    | 0.014     | -0.394   | -0.085 |
| A007259_01 |    | -0.289    | -0.233 | -0.096    | 0.071     | -0.315   | -0.122    | -0.307   | -0.143 |
| A007260_01 |    | -0.066    | -0.27  | 0.241     | 0.338     | 0.675    | 0.95      | 0.315    | 0.16   |
| A007262_01 |    | -0.06     | 0.022  | -0.352    | -0.422    | -0.249   | -0.294    | -0.062   | 0.223  |
| A007265_01 |    | -0.085    | -0.1   | -0.097    | 0.029     | 0.037    | 0.053     | 0.155    | 0.161  |
| A007266_01 |    | 0.394     | 0.133  | 0.156     | -0.119    | 0.163 NA |           | -0.017   | -0.08  |
| A007268_01 |    | 0.174     | -0.017 | -0.172    | -0.244    | 0.085    | 0.075     | 0.016    | 0.025  |
| A007272_01 |    | 0.106 NA  |        | 0.205     | 0.146 NA  |          | 0.091     | 0.037 NA |        |
| A007273_01 |    | 0.115 NA  |        | 0.285     | 0.122 NA  |          | -0.606 NA | NA       |        |
| A007274_01 |    | -0.13     | -0.237 | -0.131    | -0.041    | -0.08    | -0.053    | -0.091   | -0.176 |
| A007275_01 |    | -0.077 NA |        | -0.148    | -0.123    | 0.348    | 0.325     | 0.064    | 0.163  |
| A007277_01 |    | -0.03     | 0.025  | -0.013    | -0.071    | -0.077   | -0.009    | -0.153   | -0.058 |
| A007278_01 |    | -0.266    | -0.284 | 0.136     | 0.147     | 0.256    | 0.468     | 0.196    | 0.199  |
| A007279_01 |    | 0.065     | 0.192  | 0.574     | 0.406     | -0.207   | -0.439    | -0.14    | -0.281 |
| A007280_01 |    | -0.231    | -0.135 | -0.05     | -0.08     | 0.186    | 0.402     | -0.07    | -0.033 |
| A007281_01 |    | 0.413     | 0.152  | -0.093    | -0.023    | 0.247    | 0.24      | 0.288    | 0.186  |

|            |          |          |        |          |        |           |           |        |
|------------|----------|----------|--------|----------|--------|-----------|-----------|--------|
| A007283_01 | 0.444    | 0.267    | 0.06   | -0.007   | 0.216  | 0.134     | -0.097    | -0.115 |
| A007284_01 | 0.7 NA   |          | 0.077  | 0.221 NA | NA     |           | 0.159     | 0.03   |
| A007285_01 | 0.201    | 0.517    | 0.155  | 0.22     | 0.104  | 0.376     | -0.435    | -0.163 |
| A007287_01 | 0.101    | 0.143    | -0.109 | 0.147    | -0.223 | -0.216    | 0.168     | 0.209  |
| A007288_01 | 0.089    | -0.028   | 0.235  | 0.069    | -0.904 | -1.447    | 0.139     | -0.061 |
| A007290_01 | -0.19    | -0.178   | -0.029 | 0.058    | -1.062 | -1.284    | -0.299    | -0.377 |
| A007291_01 | 0.191    | 0.074    | -0.356 | -0.383   | -0.392 | -0.758    | -0.492    | -0.523 |
| A007293_01 | -0.103   | 0.084    | -0.082 | 0.047    | -0.085 | 0.046     | 0.05      | 0.076  |
| A007294_01 | 0.457    | 0.345    | -0.195 | -0.202   | 0.899  | 1.041     | 0.523     | 0.505  |
| A007297_01 | -0.122   | -0.031   | 0.013  | 0.138    | 0.137  | 0.295     | 0.128     | -0.051 |
| A007298_01 | 0.204    | 0.195    | -0.007 | 0.042    | 0.256  | 0.311     | 0.023     | -0.069 |
| A007299_01 | 0.763    | 0.374    | -0.072 | 0.038    | 0.438  | 0.325     | 0.333     | 0.163  |
| A007300_01 | -0.512   | -0.504   | -0.023 | -0.182   | -0.14  | -0.213    | -0.465    | -0.498 |
| A007302_01 | -0.286   | -0.324   | -0.121 | -0.193   | 0.408  | 0.612     | -0.163    | -0.099 |
| A007303_01 | -0.262   | -0.073   | 0.166  | -0.007   | -0.005 | -0.133    | 0.021     | 0.01   |
| A007305_01 | -2.029   | -1.82    | -0.289 | -0.248   | -1.822 | -1.676    | -2.289    | -1.892 |
| A007306_01 | -0.291   | -0.174   | 0.204  | 0.486    | 0.392  | 0.524     | -0.361    | -0.088 |
| A007307_01 | -0.102   | 0.032    | -0.226 | -0.038   | -0.211 | -0.174    | -0.038    | 0.125  |
| A007309_01 | 0.125    | -0.004   | -0.004 | 0.13     | 0      | -0.11     | -0.052    | -0.056 |
| A007310_01 | 0.393    | 0.246    | 0.055  | 0.15     | 0.513  | 0.427     | 0.213     | 0.188  |
| A007311_01 | 0.031    | 0.076    | -0.187 | -0.195   | -0.465 | -0.931    | -0.063    | -0.255 |
| A007313_01 | -0.41 NA |          | 0.218  | 0.237 NA |        | -0.452 NA | NA        |        |
| A007314_01 | -0.175   | 0.077    | -0.185 | -0.069   | 0.148  | 0.357     | 0.092     | 0.261  |
| A007315_01 | 0.53     | 0.594    | 0.291  | 0.075    | 0.538  | 0.59      | -0.176    | 0.026  |
| A007317_01 | 0.032 NA |          | 0.158  | 0.152 NA | NA     |           | 0.048     | -0.084 |
| A007318_01 | -1.089   | -0.718   | 0.47   | 0.285    | 0.219  | 0.351     | -0.307    | -0.387 |
| A007320_01 | 0.143    | 0.207    | 0.087  | 0.143    | -0.081 | -0.171    | -0.019    | -0.003 |
| A007322_01 | 0.073    | 0.171    | -0.06  | 0.022    | -0.382 | -0.415    | 0.09      | 0.112  |
| A007324_01 | -0.027   | -0.014   | -0.336 | 0.096    | -0.201 | -0.129 NA | NA        |        |
| A007325_01 | 0.369    | 0.382    | 0.064  | -0.079   | 0.007  | -0.235    | 0.006     | 0.012  |
| A007327_01 | 0.055    | 0.098    | 0.149  | 0.23     | 0.038  | 0.168     | -0.514    | -0.475 |
| A007331_01 | -0.112   | -0.354   | -0.188 | 0.052    | -0.378 | -0.245    | 0.06      | -0.038 |
| A007333_01 | 0.197 NA |          | 0      | -0.007   | -0.953 | -1.001 NA |           | -0.359 |
| A007334_01 | -0.332   | -0.384   | 0.172  | -0.096   | 0.008  | 0.114     | -0.119    | -0.131 |
| A007335_01 | 0.298    | 0.12     | -0.034 | 0.061    | 0.085  | 0.032     | 0.05      | -0.092 |
| A007336_01 | 0.244    | 0.15     | -0.113 | -0.096   | -0.179 | -0.225    | -0.349    | -0.355 |
| A007338_01 | -0.248   | -0.178   | -0.027 | -0.041   | -0.73  | -0.785    | -0.432    | -0.369 |
| A007340_01 | -0.401   | -0.262   | 0.007  | 0.022    | -0.154 | -0.264    | 0.045     | -0.01  |
| A007341_01 | -0.321   | -0.213   | 0.379  | 0.427    | 0.332  | 0.437     | 0.276     | 0.225  |
| A007342_01 | -0.589   | -0.834   | -0.404 | -0.483   | -1.111 | -1.328    | -0.564    | -0.661 |
| A007347_01 | -0.364   | -0.356   | -0.153 | -0.148   | 0.077  | 0.289     | -0.186    | 0.117  |
| A007348_01 | 0.131    | 0.072    | 0.161  | 0.006    | -0.034 | -0.174    | -0.004    | 0.088  |
| A007349_01 | -0.256   | -0.06    | -0.134 | -0.107   | 0.02   | 0.131     | 0.175     | 0.125  |
| A007351_01 | 0.002 NA |          | -0.294 | -0.149   | 0.23   | 0.305     | -0.188    | -0.029 |
| A007353_01 | -1.056   | -0.448   | -0.409 | -0.339   | 0.803  | 1.372     | -0.106    | 0.442  |
| A007354_01 | 0.273 NA | NA       | NA     | NA       | NA     | 0.079 NA  | NA        |        |
| A007357_01 | -0.337   | -0.409   | -0.43  | -0.232   | -1.605 | -1.785    | -0.67     | -0.678 |
| A007361_01 | -0.001   | 0.009    | -0.079 | -0.077   | 0.124  | 0.333     | 0.146     | 0.338  |
| A007362_01 | 0.694    | 1.007    | -0.348 | -0.308   | -0.837 | -1.146    | 0.367     | 0.703  |
| A007363_01 | 0.023    | 0.067    | -0.077 | -0.066   | -0.136 | -0.147    | 0.034     | 0.079  |
| A007364_01 | 0.141    | 0.036    | 0.112  | 0.074    | -0.026 | -0.113    | -0.044    | -0.146 |
| A007365_01 | -0.014   | 0.085    | -0.093 | 0.027    | -0.196 | -0.151    | -0.503    | -0.513 |
| A007366_01 | 0.107 NA |          | 0.024  | 0.134    | 0.12   | 0.103     | -0.055    | -0.118 |
| A007367_01 | -0.395   | -0.286   | -0.043 | 0.049    | -0.62  | -0.589    | -0.095    | -0.177 |
| A007370_01 | 0.162    | 0.129    | 0.132  | 0.037    | -0.842 | -1.129    | 0.064     | 0.353  |
| A007372_01 | -0.125   | -0.011   | 0.092  | 0.198    | -0.274 | -0.297    | -0.184    | -0.216 |
| A007373_01 | -0.055   | -0.286   | 0.016  | -0.006   | -0.548 | -0.665    | 0.11      | -0.07  |
| A007375_01 | 0.243    | 0.083    | 0.113  | 0.148    | 0.149  | -0.028    | 0.229     | 0.128  |
| A007379_01 | 0.125    | 0.028    | 0.188  | 0.14     | -0.026 | 0.069     | -0.265    | -0.152 |
| A007382_01 | 0.345    | 0.257    | 0.075  | -0.156   | -0.369 | -0.498    | -0.121    | -0.207 |
| A007383_01 | 0.122    | 0.268    | 0.56   | 0.599    | 0.474  | 0.66      | -0.188    | -0.102 |
| A007384_01 | -0.013   | 0.122    | 0.073  | -0.027   | -0.143 | 0.047     | -0.425    | -0.27  |
| A007385_01 | -0.217   | -0.351   | 0.402  | 0.301    | 0.71   | 0.9       | -0.055    | -0.075 |
| A007386_01 | NA       | 0.104    | -0.262 | -0.281   | 0.132  | 0.023     | -0.021 NA |        |
| A007387_01 | 0.008    | -0.151   | -0.209 | 0.022    | -0.288 | -0.134    | 0.125     | 0.075  |
| A007394_01 | 0.043 NA |          | -0.05  | 0.056 NA |        | 0.046 NA  |           | -0.002 |
| A007395_01 | 0.036    | 0.179 NA |        | 0.136    | 0.297  | 0.238     | 0.187     | 0.13   |
| A007405_01 | 0.364    | 0.426    | 0.209  | 0.091    | 0.237  | -0.016    | -0.013    | 0.055  |

|            |    |           |          |           |           |        |           |           |        |
|------------|----|-----------|----------|-----------|-----------|--------|-----------|-----------|--------|
| A007406_01 |    | 0.502     | 0.023    | 0.031     | -0.187    | 0.317  | -0.063    | 0.163     | -0.056 |
| A007409_01 |    | -0.413 NA |          | 0.142     | 0.191 NA  |        | -0.086 NA | NA        |        |
| A007414_01 |    | 0.222     | 0.466    | 0.209     | 0.076     | 0.43   | 0.413     | -0.344    | -0.242 |
| A007422_01 |    | -0.103    | -0.057   | 0.094     | 0.196     | 0.145  | 0.166     | -0.216    | -0.117 |
| A007424_01 |    | 0.216     | 0.266 NA | NA        |           | 0.031  | 0.103 NA  |           | 0.222  |
| A007428_01 |    | 0.074     | 0.015    | -0.05     | -0.192    | 0.2    | 0.209 NA  |           | 0.212  |
| A007429_01 |    | 0.835     | 0.601    | 0.287     | 0.228     | -0.024 | -0.036    | -0.152    | -0.302 |
| A007430_01 |    | -0.014    | 0.03     | -0.047    | -0.279    | -0.077 | 0.106     | -0.066    | 0.063  |
| A007431_01 |    | 0.161     | 0.008    | -0.189    | -0.095    | 0.209  | 0.339     | 0.134     | 0.049  |
| A007433_01 |    | 0.748     | 0.663    | 0.583     | 0.546     | 0.797  | 0.78      | 0.319     | 0.453  |
| A007434_01 |    | 0.179 NA  |          | 0.004     | 0.024     | 0.052  | 0.001     | 0.147     | 0.253  |
| A007435_01 |    | 0.074 NA  |          | 0.023     | 0.101     | -0.268 | -0.182 NA |           | 0.149  |
| A007436_01 |    | -0.14 NA  |          | -0.001    | 0.093 NA  |        | 0.385 NA  |           | 0.353  |
| A007438_01 |    | -0.035    | 0.038    | -0.036    | 0.083     | -0.252 | -0.096    | -0.231    | 0.041  |
| A007442_01 |    | -0.189    | 0.014    | -0.087    | -0.034    | 0.192  | 0.426     | -0.409    | -0.144 |
| A007445_01 |    | 0.015     | 0.008    | -0.067    | -0.097    | 0.176  | 0.141     | -0.023    | 0.181  |
| A007459_01 |    | -0.183 NA |          | -0.71     | -0.44     | 0.009  | 0.211 NA  |           | 0.538  |
| A007468_01 |    | 0.181 NA  |          | -0.008    | 0.138     | -0.215 | 0.002 NA  | NA        |        |
| A007475_01 | NA |           | -1.819   | -0.557    | -0.557 NA |        | -3.114    | -2.011    | -1.632 |
| A007479_01 |    | 0.018     | -0.094   | -0.354 NA |           | -0.147 | 0.009 NA  | NA        |        |
| A007484_01 |    | -0.137    | -0.195   | -0.368    | -0.172    | 0.119  | 0.018     | 0.475     | 0.246  |
| A007485_01 |    | 0.073     | 0.016    | 0.002     | 0.095     | -0.249 | -0.237    | 0.043     | 0.07   |
| A007498_01 |    | 0.137     | 0.071    | 0.006     | -0.068    | 0      | 0.001 NA  | NA        |        |
| A007499_01 | NA |           | 0.57     | 0.121     | 0.181 NA  |        | -0.21     | -0.209    | 0.093  |
| A007502_01 |    | 0.108 NA  |          | -0.206 NA |           | 0.419  | 0.512 NA  |           | 0.482  |
| A007508_01 |    | -0.19 NA  |          | -0.007    | 0.17 NA   |        | -0.14     | -0.032    | 0.069  |
| A007510_01 |    | -0.228    | -0.064   | -0.172    | -0.113    | 0.011  | 0.273     | -0.184 NA |        |
| A007513_01 |    | -0.357    | -0.154   | -0.035    | 0.15      | -0.491 | -0.309 NA |           | -0.063 |
| A007519_01 |    | -0.118 NA |          | -0.193 NA |           | -0.54  | -0.25 NA  | NA        |        |
| A007520_01 |    | 0.056     | 0.124    | 0.12      | 0.219     | 0.254  | 0.391     | 0.143     | 0.172  |
| A007521_01 |    | 0.082     | -0.077   | -0.112    | 0.115     | -0.161 | -0.113 NA | NA        |        |
| A007522_01 |    | 0.096     | -0.078   | -0.125    | -0.103    | -0.07  | -0.138    | 0.198     | 0.131  |
| A007524_01 |    | 0.216     | 0.052    | -0.136    | -0.167    | 0.241  | 0.316     | -0.046    | -0.068 |
| A007526_01 |    | 0.384 NA  |          | 0.259     | 0.01 NA   | NA     | NA        | NA        | 0.211  |
| A007530_01 |    | 0.403     | 0.501    | 0.146     | 0.057     | 0.334  | 0.315     | 0.12      | 0.216  |
| A007535_01 |    | 0.349     | 0.43     | -0.173    | -0.131    | -0.331 | -0.239    | 0.177     | 0.376  |
| A007537_01 |    | 0.022     | 0.095    | 0.154     | 0.06      | 0.179  | 0.098     | 0.05      | 0.172  |
| A007548_01 |    | 0.238     | 0.276    | 0.894     | 0.703     | 0.959  | 1.352     | -0.241    | -0.067 |
| A007549_01 |    | 0.117     | 0.043    | 0.032     | 0.046     | -0.229 | -0.102    | 0.08      | 0.124  |
| A007554_01 |    | 0.079 NA  |          | -0.04     | 0.105     | 0.263  | 0.379     | -0.044    | 0.264  |
| A007555_01 |    | -0.774 NA |          | -0.195    | 0.037 NA  | NA     | NA        |           | 0.029  |
| A007564_01 |    | -0.118    | -0.148   | 0.248     | 0.315     | -0.136 | 0.144 NA  | NA        |        |
| A007565_01 |    | 0.177 NA  |          | -0.05     | 0.106     | 0.064  | 0.166     | -0.168    | 0.025  |
| A007567_01 |    | -0.06     | 0.087    | -0.154    | -0.438    | -0.019 | -0.053    | -0.221    | 0.234  |
| A007573_01 | NA | NA        |          | 0.168     | 0.273     | -0.075 | -0.091 NA | NA        |        |
| A007575_01 |    | 0.22      | 0.102    | 0.144     | 0.129     | -0.248 | -0.487    | 0.001     | -0.076 |
| A007577_01 |    | 0.149     | 0.538    | 0.198     | 0.136     | 0.221  | 0.258 NA  | NA        |        |
| A007582_01 |    | 0.162     | 0.009    | 0.21      | 0.04      | 0.061  | -0.174 NA | NA        |        |
| A007584_01 |    | -0.166    | 0.006    | -0.127    | -0.119    | 0.222  | 0.371     | 0.037     | 0.171  |
| A007589_01 |    | 0.043     | -0.054   | 0.089     | 0.236     | 0.086  | 0.13      | -0.016    | 0.013  |
| A007590_01 |    | 0.049     | 0.041    | -0.085    | 0.185     | -0.366 | -0.161    | -0.068    | -0.18  |
| A007593_01 |    | -0.043    | -0.203   | -0.173    | -0.096    | -0.224 | -0.402    | -0.005    | -0.082 |
| A007596_01 |    | 0.253 NA  |          | 0.122     | 0.086     | 0.415  | 0.339     | -0.04     | 0.026  |
| A007597_01 |    | 0.236     | 0.122    | -0.045    | -0.192    | 0.034  | -0.229    | 0.157     | 0.069  |
| A007599_01 | NA | NA        |          | 0.311     | 0.261     | 0.76   | 0.896     | 0.178     | 0.314  |
| A007600_01 |    | -0.011    | -0.204   | 0.128     | 0.118     | -0.157 | -0.181    | 0.159     | 0.019  |
| A007604_01 |    | 0.675     | 0.518    | 0.409     | 0.252     | 0.765  | 0.867     | 0.182     | 0.388  |
| A007606_01 |    | -0.091    | -0.405   | -0.156    | -0.115    | -0.292 | -0.23     | -0.102    | -0.149 |
| A007616_01 |    | -0.329 NA |          | -0.067    | -0.122 NA |        | -0.369 NA | NA        |        |
| A007618_01 |    | -1.002    | -0.725   | 0.844     | 1.007     | 1.212  | 1.724     | 0.412     | 0.538  |
| A007620_01 |    | -0.04 NA  |          | -0.093    | -0.064    | -0.126 | -0.189    | 0.087     | 0.235  |
| A007621_01 |    | -0.24 NA  |          | -0.232    | -0.186    | 0.099  | 0.147 NA  |           | 0.343  |
| A007622_01 |    | -0.271    | -0.48    | -0.065 NA |           | -0.683 | -0.686 NA | NA        |        |
| A007627_01 |    | -0.766    | -0.791   | -0.088    | 0.166     | -1.158 | -1.316    | 0.105     | 0.121  |
| A007630_01 |    | 0.341     | 0.026    | 0.19      | 0.048     | -0.224 | -0.573    | 0.213     | -0.16  |
| A007644_01 |    | -0.169 NA |          | -0.176    | 0.175 NA  |        | -0.411 NA |           | 0.086  |
| A007646_01 |    | -0.045    | 0.046    | 0.262     | 0.247     | -0.147 | -0.142    | -0.488    | -0.365 |
| A007648_01 |    | 0.021     | -0.006   | -0.117    | -0.248    | 0.061  | 0.099     | -0.065    | 0.024  |

|            |           |           |           |           |           |           |           |        |
|------------|-----------|-----------|-----------|-----------|-----------|-----------|-----------|--------|
| A007649_01 | 0.079     | -0.007    | 0.184     | 0.08      | 0.677     | 0.429     | 0.395     | 0.38   |
| A007651_01 | 0.355     | 0.277     | 0.085     | 0.044     | -0.402    | -0.528    | 0.259     | 0.171  |
| A007654_01 | -0.321    | -0.268    | 0.084     | -0.076    | 0.454     | 0.529     | -0.057    | -0.107 |
| A007656_01 | -0.332    | 0.113     | -0.381    | -0.105    | -1.677    | -1.719    | -0.395    | -0.323 |
| A007657_01 | -0.027    | -0.085    | -0.126    | 0.058     | 0.101     | 0.14      | 0.07      | 0.013  |
| A007659_01 | -0.082    | 0.02 NA   |           | 0.053     | 0.104     | 0.245 NA  |           | 0.019  |
| A007665_01 | -0.295    | -0.259    | -0.037    | 0.046     | 0.261     | 0.25      | 0.102     | -0.026 |
| A007680_01 | 0.074     | 0.285     | 0.138     | 0.001     | 0.297     | 0.318     | -0.068    | 0.196  |
| A007686_01 | -0.164    | -0.11     | -0.334    | -0.329    | 0.695     | 0.94      | -0.094    | 0.018  |
| A007696_01 | 0.353     | 0.574     | -0.185    | -0.139    | 0.408     | 0.442     | 0.29      | 0.542  |
| A007697_01 | 0.198     | 0.081     | 0.12      | 0.014     | 0.152     | 0.229     | -0.012    | -0.018 |
| A007702_01 | 0.164     | -0.141    | 0.235     | 0.288     | -0.031    | -0.09     | 0.011     | -0.031 |
| A007704_01 | 0.577     | 0.532     | -0.275    | 0.016     | -0.015    | -0.128    | -0.116    | -0.097 |
| A007709_01 | 0.027     | -0.196    | -0.01     | -0.16     | 0.132     | 0.094     | 0.149     | 0.028  |
| A007714_01 | -0.222    | -0.023    | -0.014    | -0.001    | 0.346     | 0.303     | 0.204     | 0.319  |
| A007716_01 | 0.266     | 0.342     | -0.429 NA |           | -0.002    | 0.188 NA  |           | 0.493  |
| A007723_01 | -0.139 NA |           | -0.165    | -0.044 NA |           | -0.685 NA | NA        |        |
| A007725_01 | -0.002    | -0.064    | -0.074    | -0.011    | -0.324    | -0.333    | 0.046     | -0.077 |
| A007727_01 | 0.143 NA  |           | -0.133    | -0.05 NA  |           | 0.325     | -0.025    | -0.003 |
| A007730_01 | 0.02      | 0.15      | -0.051    | 0.112     | -0.49     | -0.169    | -0.057    | -0.032 |
| A007733_01 | -0.144    | -0.073    | -0.075    | -0.115    | -0.712    | -1.066    | -0.203    | -0.057 |
| A007736_01 | 0.115     | -0.01     | -0.158    | -0.03     | -0.108    | -0.1      | -0.012 NA |        |
| A007739_01 | 0.055 NA  |           | 0.256     | 0.322 NA  |           | -0.283    | 0.003     | -0.125 |
| A007744_01 | -0.323 NA |           | 0.094     | 0.128     | -0.359    | -0.631 NA |           | -0.067 |
| A007746_01 | -0.351    | -0.4      | 0.607     | 0.502     | 1.309     | 1.632     | 0.406     | 0.477  |
| A007749_01 | 0.253 NA  |           | 0.008     | 0.288 NA  |           | -0.064    | -0.183    | -0.142 |
| A007750_01 | 0.251     | 0.511     | -0.006    | 0.081     | 0.189     | 0.24      | 0.076     | 0.327  |
| A007753_01 | 0.196     | 0.068     | 0.251     | 0.18      | 0.565     | 0.607     | 0.223     | 0.16   |
| A007756_01 | 0.11      | 0.141     | 0.098     | 0.06      | 0.183     | 0.194     | -0.836    | -0.76  |
| A007757_01 | -0.473 NA |           | -0.077 NA | NA        | NA        | NA        | NA        |        |
| A007759_01 | 0.186     | 0.067     | -0.125    | -0.134    | 0.07      | -0.063    | 0.089     | -0.1   |
| A007762_01 | -0.127 NA |           | 0.355     | 0.222 NA  | NA        | NA        |           | 0.008  |
| A007765_01 | -0.04     | -0.039    | 0.041     | -0.017    | 0.059     | 0.036 NA  | NA        |        |
| A007766_01 | -0.175    | 0.134     | 0.026     | -0.12     | 0.093     | 0.247     | -0.28     | 0.072  |
| A007767_01 | 0.243     | 0.426     | 0.529     | 0.433     | 0.584     | 0.544     | 0.454     | 0.603  |
| A007768_01 | 0.385     | 0.445     | -0.04     | 0.074     | -0.473    | -0.801    | -0.007    | -0.012 |
| A007770_01 | 0.062 NA  |           | 0.157     | 0.215     | 0.192     | 0.451     | 0.156     | 0.308  |
| A007776_01 | -0.299 NA |           | 0.303     | 0.357     | -0.421    | -0.571 NA | NA        |        |
| A007778_01 | 0.112     | -0.006    | 0.074     | 0.105     | 0.023     | -0.035    | -0.14     | -0.108 |
| A007781_01 | 0.07      | 0.166     | -0.059    | -0.157    | -0.119    | -0.05     | 0.157     | 0.15   |
| A007786_01 | 0.397 NA  |           | -0.132    | -0.142    | 0.31      | -0.006 NA |           | -0.028 |
| A007791_01 | -0.028    | -0.081    | 0.02      | 0.158     | 0.472     | 0.766     | 0.209     | 0.153  |
| A007792_01 | -0.185    | -0.09     | -0.165    | -0.264    | -0.155    | 0.028     | -0.084    | 0.05   |
| A007793_01 | 0.075     | -0.026 NA | NA        |           | -0.182 NA | NA        |           | -0.123 |
| A007794_01 | 0.168     | 0.412     | 0.442     | 0.282     | 0.249     | 0.077     | 0.004     | 0.108  |
| A007795_01 | 0.425     | 0.618     | -0.071    | -0.006 NA |           | -1.387    | -0.066 NA |        |
| A007797_01 | -0.784    | -0.533    | -0.516    | -0.367    | -2.406    | -2.566    | -0.763    | -0.476 |
| A007798_01 | -0.176 NA |           | 0.061     | 0.354 NA  |           | 0.113     | 0.152     | 0.117  |
| A007801_01 | -0.01     | 0.339     | -0.093    | -0.167    | -0.085    | -0.286    | -0.024    | 0.121  |
| A007804_01 | -0.468    | -0.471    | 0.032     | 0.098     | -0.405    | -0.406    | -0.542    | -0.235 |
| A007805_01 | -0.248 NA |           | 0.431     | 0.193     | -0.5      | -0.375    | -0.099    | -0.129 |
| A007806_01 | -0.025 NA |           | 0.349     | 0.171 NA  |           | -0.651 NA | NA        |        |
| A007808_01 | -0.207 NA |           | -0.128    | -0.189    | -0.275    | -0.441    | 0.116     | 0.008  |
| A007809_01 | -0.202    | -0.106    | 0.178     | -0.079    | -0.087    | -0.166    | 0.048     | 0.282  |
| A007810_01 | -0.219    | -0.161    | 0.295     | 0.327     | -0.295    | -0.468    | -0.306    | -0.299 |
| A007811_01 | -0.341 NA |           | -0.118    | -0.129 NA |           | 0.012 NA  | NA        |        |
| A007812_01 | -0.462    | -0.461    | -0.155    | -0.213    | 0.738     | 0.975     | 0.183     | 0.258  |
| A007814_01 | -0.054 NA |           | -0.133    | 0.023     | 0.345     | 0.556     | 0.394     | 0.416  |
| A007815_01 | -1.75     | -1.193    | 0.135     | 0.264     | -2.087    | -2.03     | -0.95     | -0.722 |
| A007816_01 | -0.969    | -0.767    | 0.326     | 0.33      | -1.05     | -0.774    | -1.071    | -0.544 |
| A007817_01 | 0.245     | 0.226     | 0.121     | 0.362 NA  |           | -0.028    | 0.003     | 0.031  |
| A007820_01 | 0.405     | 0.42 NA   | NA        |           | 0.866     | 1.053 NA  | NA        |        |
| A007823_01 | -0.214    | 0.047     | -0.077    | 0.142     | -0.068    | -0.066    | 0.198     | 0.266  |
| A007827_01 | 0.281     | 0.32      | 0.26      | 0.268     | 0.045     | -0.004    | -0.287    | -0.159 |
| A007829_01 | 0.061     | 0.262     | 0.062     | -0.053    | 0.3       | 0.439     | 0.115     | 0.245  |
| A007830_01 | 0.151     | -0.057    | -0.128    | -0.102    | 0.558     | 0.605     | 0.229     | 0.101  |
| A007832_01 | 0.044     | 0.021     | -0.111    | -0.093    | 0.214     | 0.346     | 0.066     | 0.03   |
| A007833_01 | 0.193 NA  |           | 0.024 NA  |           | 0.197     | 0.151 NA  | NA        |        |

|            |    |           |        |           |           |        |           |        |    |        |
|------------|----|-----------|--------|-----------|-----------|--------|-----------|--------|----|--------|
| A007834_01 |    | -0.107 NA |        | -0.149 NA |           | 0.026  | 0.14 NA   |        | NA |        |
| A007835_01 |    | -0.055    | 0.326  | -0.038    | 0.121     | 0.024  | 0.135     | 0.283  |    | 0.385  |
| A007836_01 |    | 0.081     | -0.066 | -0.991 NA |           | -0.876 | -1.265 NA |        | NA |        |
| A007840_01 |    | -0.164 NA |        | -0.171    | -0.163 NA |        | -0.568    | 0.181  |    | 0.087  |
| A007844_01 |    | 0.302     | 0.311  | -0.336    | -0.158    | 0.589  | 0.763     | 0.201  |    | 0.141  |
| A007846_01 |    | -0.058    | 0.187  | -0.397    | -0.205    | 0.182  | 0.28 NA   |        |    | 0.205  |
| A007848_01 |    | 0.128     | 0.06   | -0.038    | -0.022    | 0.143  | 0.005     | 0.08   |    | -0.006 |
| A007850_01 |    | 0.156 NA  |        | 0.049     | 0.157 NA  |        | 0.12 NA   |        |    | 0.049  |
| A007852_01 |    | 0.272     | 0.261  | -0.017    | 0.009     | -0.019 | -0.184    | 0.03   |    | -0.004 |
| A007859_01 |    | -0.039    | 0.061  | -0.272    | -0.084    | 0.392  | 0.686     | 0.322  |    | 0.202  |
| A007860_01 |    | 0.325     | 0.303  | -0.373    | -0.372    | 0.584  | 0.574     | 0.586  |    | 0.6    |
| A007862_01 |    | 0.26      | 0.295  | 0.403     | 0.306     | -0.204 | -0.431 NA |        |    | -0.163 |
| A007865_01 |    | 0.093     | 0.127  | -0.051    | -0.055    | 0.069  | 0.093     | 0.036  |    | 0.036  |
| A007868_01 |    | 0.247     | 0.003  | -0.152    | 0.082     | 0.065  | 0.097     | 0.089  |    | -0.015 |
| A007870_01 |    | -0.088    | -0.067 | -0.161    | -0.009    | -0.216 | -0.197    | -0.216 |    | -0.165 |
| A007871_01 |    | -0.335    | -0.281 | -0.107    | -0.152    | -0.101 | -0.026    | -0.042 |    | -0.064 |
| A007873_01 |    | -0.327    | -0.281 | -0.19     | -0.118    | -0.33  | -0.321    | 0.208  |    | 0.113  |
| A007875_01 |    | -0.106    | -0.094 | 0.037     | 0.309     | -0.012 | 0.046     | -0.141 |    | -0.109 |
| A007876_01 |    | 0.427     | 0.22   | 0.485     | 0.532     | 0.653  | 0.798     | 0.121  |    | -0.025 |
| A007877_01 |    | 0.206     | 0.3    | 0.229     | 0.096     | 0.189  | 0.07      | -0.142 |    | -0.003 |
| A007878_01 |    | 0.184     | 0.02   | -0.086    | -0.176    | -0.435 | -0.703    | 0.172  |    | 0.012  |
| A007880_01 |    | 0.211     | 0.305  | -0.2      | -0.088    | 0.483  | 0.575     | 0.285  |    | 0.3    |
| A007883_01 |    | -0.323    | -0.195 | -0.156    | -0.361    | -0.073 | 0.172     | 0.136  |    | 0.179  |
| A007885_01 | NA |           | 0.189  | -0.181    | -0.051    | 0.014  | 0.175     | 0.03   |    | -0.023 |
| A007886_01 |    | -0.024    | 0.046  | -0.399    | -0.457    | 0.042  | 0.141     | -0.078 |    | 0.16   |
| A007891_01 |    | -0.445    | -0.302 | 0.797     | 0.698     | 1.003  | 1.331     | 0.301  |    | 0.027  |
| A007892_01 | NA | NA        |        | 0.761     | 0.697     | 0.268  | 0.3       | -0.486 |    | -0.396 |
| A007893_01 | NA | NA        |        | 0.083     | 0.13 NA   |        | -0.328    | -0.138 |    | -0.148 |
| A007894_01 |    | -0.262    | -0.149 | -0.001    | -0.092    | -0.215 | -0.142    | -0.376 |    | -0.204 |
| A007896_01 |    | -0.029    | -0.003 | -0.151    | -0.094    | -0.443 | -0.698    | 0.413  |    | 0.362  |
| A007897_01 |    | 0.021 NA  |        | 0.132 NA  |           | 0.896  | 1.189 NA  |        |    | 0.633  |
| A007898_01 |    | -0.43     | -0.47  | 0.963     | 0.997     | 0.948  | 1.381     | 0.143  |    | 0.015  |
| A007899_01 |    | 0.021 NA  |        | -0.346    | 0.028     | -0.076 | 0.1 NA    |        |    | 0.128  |
| A007901_01 |    | -0.273    | -0.21  | 0.105     | 0.311     | -0.396 | -0.464    | -0.164 |    | -0.24  |
| A007902_01 |    | 0.075     | 0.095  | -0.158    | -0.209    | 0.052  | 0.185     | -0.024 |    | 0.059  |
| A007903_01 |    | -0.202    | -0.306 | -0.078    | -0.1      | -0.23  | -0.334    | 0.016  |    | -0.12  |
| A007905_01 |    | 0.024 NA  |        | 0.842     | 0.986 NA  |        | -0.243    | -0.647 |    | -0.698 |
| A007906_01 |    | 0.056     | -0.031 | 0.105     | 0.069     | 0.212  | 0.246     | 0.24   |    | 0.131  |
| A007923_01 |    | 0.107     | 0.072  | 0.051     | 0.199     | -0.448 | -0.63 NA  |        |    | 0.067  |
| A007924_01 |    | 0.019 NA  |        | 0.034 NA  | NA        |        | -0.268 NA | NA     |    |        |
| A007925_01 |    | 0.109 NA  |        | 0.05      | -0.048 NA |        | -0.049 NA |        |    | -0.006 |
| A007926_01 |    | -0.267    | 0.193  | 0.042     | -0.454    | 0.275  | 0.5       | 0.024  |    | 0.481  |
| A007929_01 |    | -0.468 NA |        | 0.144     | 0.073     | -0.357 | -0.474 NA |        |    | -0.281 |
| A007930_01 |    | -0.066    | -0.023 | -0.324    | -0.155    | -0.44  | -0.409    | -0.146 |    | -0.062 |
| A007931_01 |    | -0.191 NA |        | -0.434    | -0.024    | -0.477 | -0.288 NA | NA     |    |        |
| A007932_01 |    | 0.048 NA  |        | -0.012    | 0.176 NA  |        | 0.229     | 0.292  |    | 0.313  |
| A007934_01 |    | -0.143    | -0.289 | -0.25     | 0.023     | -0.375 | -0.437 NA |        |    | -0.111 |
| A007939_01 |    | -0.013    | -0.013 | 0.065     | -0.084    | -0.107 | -0.321 NA |        |    | -0.063 |
| A007941_01 |    | 0.069     | -0.139 | -0.175    | -0.128    | 0.116  | 0.245     | 0.275  |    | 0.141  |
| A007942_01 |    | 0.16      | 0.399  | -0.007    | 0.043     | 0.212  | 0.252     | -0.067 |    | 0.086  |
| A007945_01 |    | -0.13 NA  |        | -0.226 NA |           | 0.049  | 0.128 NA  |        |    | 0.237  |
| A007947_01 |    | -0.176    | -0.209 | -0.105    | -0.217    | 0.283  | 0.324     | 0.1    |    | 0.185  |
| A007949_01 |    | -0.695    | -0.695 | -0.276    | -0.268    | -0.587 | -0.46     | -0.264 |    | -0.043 |
| A007950_01 |    | 0.107     | 0.243  | -0.123    | -0.086    | -0.456 | -0.647    | -0.256 |    | -0.072 |
| A007951_01 |    | -0.016    | -0.03  | -0.312    | -0.182    | -0.157 | -0.091    | -0.063 |    | -0.156 |
| A007952_01 |    | 0.061     | 0.036  | 0.01      | 0.037     | 0.233  | 0.252     | 0.198  |    | 0.133  |
| A007953_01 |    | -0.07     | 0.075  | -0.336    | -0.314    | 0.043  | 0.142 NA  |        |    | 0.199  |
| A007954_01 |    | 0.303     | 0.252  | 0.147     | 0.064     | 0.088  | -0.052 NA | NA     |    |        |
| A007955_01 |    | -0.302    | -0.326 | -0.491    | -0.424    | 0.23   | 0.355     | -0.341 |    | -0.404 |
| A007959_01 |    | 0.273     | 0.203  | -0.079    | -0.092    | 0.409  | 0.397     | 0.328  |    | 0.332  |
| A007961_01 |    | -0.153    | 0.247  | 0.177     | 0.154     | -0.02  | 0.037     | -0.243 |    | -0.058 |
| A007964_01 |    | -1.368    | -1.321 | -0.043    | 0.128     | -1.805 | -1.741    | -1.795 |    | -1.693 |
| A007966_01 |    | 0.396     | 0.532  | 0.097     | 0.065     | 0.37   | 0.413     | 0.028  |    | 0.141  |
| A007967_01 |    | -0.081    | -0.138 | -0.101    | -0.014    | 0.14   | 0.25      | -0.304 |    | -0.211 |
| A007969_01 |    | -0.261    | -0.254 | -0.239    | -0.27     | 0.013  | 0.089     | 0.044  |    | -0.032 |
| A007971_01 |    | -0.002 NA |        | 0.477     | 0.233     | 0.658  | 0.729 NA  |        |    | 0.251  |
| A007973_01 |    | 0.174 NA  |        | 0.267     | 0.143     | 0.941  | 0.905     | 0.241  |    | 0.122  |
| A007974_01 |    | -0.133    | 0.008  | 0.364     | 0.564     | 0.863  | 1.211     | 0.478  |    | 0.543  |

|            |           |          |           |          |        |           |           |        |
|------------|-----------|----------|-----------|----------|--------|-----------|-----------|--------|
| A007975_01 | -0.619    | -0.698   | -0.959    | -0.84    | -0.542 | -0.521    | -0.707    | -0.565 |
| A007977_01 | 0.547     | 0.766    | -0.172    | 0.001    | 0.392  | 0.313     | 0.07      | 0.341  |
| A007981_01 | -0.949 NA |          | -0.119    | 0.099    | 0.131  | 0.448     | -0.6      | -0.325 |
| A007982_01 | 0.045     | -0.049   | -0.057    | -0.049   | 0.06   | 0.076     | -0.213    | 0.005  |
| A007983_01 | 0.062 NA  |          | -0.135    | 0.315    | -0.035 | 0.052 NA  | NA        |        |
| A007988_01 | 0.4       | 0.118    | -0.063    | -0.054   | 0.041  | 0.029     | 0.078     | 0.027  |
| A007989_01 | 0.344     | 0.277    | 0.126     | 0.229    | 0.139  | 0.272 NA  | NA        |        |
| A007993_01 | 0.176     | 0.407    | 0.028     | 0.151    | -0.322 | -0.481    | -0.081    | -0.086 |
| A007994_01 | -0.347    | -0.194   | -0.064    | -0.255   | -0.053 | -0.075    | 0.096     | 0.252  |
| A007998_01 | -0.043 NA |          | -0.4      | -0.333   | -0.119 | -0.049 NA |           | 0.064  |
| A008004_01 | 0.116     | 0.058    | -0.275    | -0.111   | 0.206  | 0.275     | 0.111     | -0.012 |
| A008005_01 | 0.07 NA   |          | 0.143 NA  |          | -0.772 | -0.683 NA | NA        |        |
| A008007_01 | 0.191     | 0.238    | -0.418    | -0.343   | -0.489 | -0.563    | -0.222    | -0.144 |
| A008009_01 | -0.435    | -0.267   | -0.225    | 0.11     | -0.207 | 0.011 NA  | NA        |        |
| A008010_01 | -0.104    | -0.046   | -0.389    | -0.143   | -0.174 | 0.013     | -0.038    | 0.141  |
| A008012_01 | 0.177     | -0.06    | 0.165     | 0.064    | 0.15   | 0.183     | -0.166    | -0.031 |
| A008014_01 | 0.13      | 0.154    | -0.083    | -0.21    | 0.053  | -0.019    | 0.082     | 0.329  |
| A008017_01 | -0.467    | -0.397   | 0.02      | -0.07    | -0.252 | -0.386    | 0.17      | 0.145  |
| A008018_01 | -0.115    | 0.232    | -0.026    | 0.111    | -0.028 | 0.224     | -0.205    | 0.155  |
| A008026_01 | 0.226     | 0.281    | 0.267     | 0.454    | -0.538 | -0.602    | -0.093    | -0.186 |
| A008027_01 | -0.124    | -0.125   | -0.244    | -0.213   | -0.199 | -0.308    | 0.014     | 0.019  |
| A008033_01 | -0.113    | -0.303   | -0.197    | -0.07    | -0.255 | -0.268    | -0.018    | 0.078  |
| A008035_01 | -0.011    | -0.051   | -0.134    | -0.055   | 0.059  | 0.221     | -0.082    | 0.045  |
| A008036_01 | -0.019    | -0.089   | -0.14     | -0.127   | -0.066 | -0.008    | -0.016    | -0.057 |
| A008038_01 | -0.192    | -0.083   | 0.08      | 0.086    | -0.219 | -0.265    | -0.375    | -0.219 |
| A008039_01 | -0.051    | 0.117    | 0.203     | -0.038   | 0.287  | 0.444     | 0.011     | 0.169  |
| A008042_01 | 0.355     | 0.445    | 0.298     | 0.384    | 0.781  | 1.161     | -0.012    | 0.023  |
| A008043_01 | 0.125     | 0.164    | -0.364    | -0.026   | 0.064  | 0.256 NA  | NA        |        |
| A008044_01 | 0.004 NA  |          | -0.193 NA | NA       |        | 0.15 NA   | NA        |        |
| A008047_01 | 0.031 NA  |          | -0.003    | 0.176    | -0.309 | -0.217    | -0.28     | -0.104 |
| A008049_01 | 0.181 NA  |          | 0.494     | 0.431 NA |        | -0.822    | -0.062    | -0.148 |
| A008052_01 | -0.502 NA | NA       | NA        |          | 0.277  | 0.564 NA  | NA        |        |
| A008053_01 | -0.199    | 0.232    | 0.143     | 0.157    | 0.04   | 0.123     | 0.171     | 0.517  |
| A008055_01 | -0.828    | -0.719   | -0.634    | -0.769   | -1.812 | -1.747    | -1.707    | -1.163 |
| A008056_01 | -0.513    | -0.69    | -0.655    | -0.836   | -1.986 | -2.029    | -1.998    | -1.611 |
| A008060_01 | -0.286    | -0.496   | -0.362    | -0.325   | -0.695 | -0.762    | -0.517    | -0.415 |
| A008068_01 | -0.02     | 0.049    | -0.145 NA |          | 0.373  | 0.518 NA  | NA        |        |
| A008070_01 | 0.076 NA  |          | 0.271     | 0.26     | -0.175 | -0.183 NA |           | -0.067 |
| A008074_01 | 0.305     | 0.232    | -0.004    | -0.047   | 0.008  | 0.017 NA  | NA        |        |
| A008081_01 | 0.05      | -0.049   | -0.269    | -0.004   | -0.326 | -0.271    | -0.047    | -0.055 |
| A008083_01 | 0.094     | 0.181    | -0.004    | 0.048    | 0.181  | 0.195     | 0.22      | 0.262  |
| A008087_01 | -0.337    | -0.035   | -0.002    | -0.077   | -0.142 | 0.178     | -0.431    | 0.035  |
| A008088_01 | -0.148    | 0.267    | -0.045    | 0.14     | -0.114 | -0.007    | 0.016     | 0.082  |
| A008089_01 | -0.195    | -0.266   | -0.811    | -0.463   | -0.476 | -0.436    | -0.019    | 0.029  |
| A008090_01 | 0.072 NA  |          | -0.067    | -0.168   | 0.083  | 0.07      | 0.222     | -0.049 |
| A008092_01 | 0.009     | -0.058   | -0.026    | -0.042   | -0.222 | -0.519    | 0.036     | -0.1   |
| A008094_01 | 0.327     | 0.143 NA | NA        |          | -1.131 | -1.565 NA |           | 0.621  |
| A008107_01 | 0.03      | -0.221   | 0.027     | 0.023    | -0.377 | -0.497    | 0.289     | 0.025  |
| A008119_01 | -0.297    | -0.082   | -0.492 NA |          | 0.18   | 0.445 NA  | NA        |        |
| A008122_01 | -0.243    | 0.315    | -0.191    | -0.024   | 0.158  | 0.506     | -0.252 NA |        |
| A008127_01 | 0.057     | 0.05     | -0.408    | -0.14    | 0.017  | 0.091 NA  | NA        |        |
| A008130_01 | 0.027 NA  |          | 0.125 NA  |          | -0.065 | -0.228 NA | NA        |        |
| A008131_01 | -0.582    | -0.188   | -0.087    | 0.083    | -1.136 | -1.152    | -0.586    | -0.518 |
| A008132_01 | 0.191     | 0.149    | -0.168    | -0.084   | 0.165  | 0.038     | 0.124     | 0.167  |
| A008133_01 | 0.331     | 0.145    | 0.184     | 0.239    | 0.016  | -0.087    | -0.117    | -0.25  |
| A008135_01 | -0.155    | 0.006    | 0.014     | -0.312   | 0.083  | 0.177     | 0.111     | 0.261  |
| A008136_01 | 0.304 NA  |          | 0.17      | 0.094    | 0.296  | 0.178     | 0.057     | 0.043  |
| A008137_01 | 0.036     | 0.789    | -0.106 NA |          | 0.373  | 0.523     | 0.544     | 1.119  |
| A008139_01 | -0.19     | -0.3     | -0.197    | -0.148   | 0.195  | 0.377     | 0.016     | 0.046  |
| A008143_01 | 0.134 NA  |          | -0.092    | -0.27    | -0.401 | -0.617 NA |           | -0.326 |
| A008148_01 | -0.039    | 0.138    | 0.064     | -0.046   | 0.051  | 0.172     | -0.077    | 0.111  |
| A008153_01 | -0.072 NA |          | -0.075 NA |          | 0.074  | 0.282 NA  | NA        |        |
| A008161_01 | 0.163     | 0.239    | -0.086    | 0.072    | 0.141  | 0.071     | 0.118     | 0.133  |
| A008164_01 | 0.237     | 0.225    | 0.167     | 0.264    | -0.351 | -0.503 NA | NA        |        |
| A008165_01 | 0.046     | 0.396    | 0.236     | 0.25     | 0.177  | 0.515 NA  |           | 0.031  |
| A008166_01 | -0.497    | 0.18     | 0.178     | -0.144   | 0.322  | 0.52      | -0.159    | 0.284  |
| A008170_01 | NA        | NA       | 0.078     | -0.093   | 0.155  | 0.073     | 0.215     | 0.13   |
| A008172_01 | 0.04      | -0.113   | 0.471     | 0.255    | 0.53   | 0.396     | 0.188     | 0.129  |

|            |        |        |        |        |        |        |        |        |
|------------|--------|--------|--------|--------|--------|--------|--------|--------|
| A008173_01 | -0.022 | -0.128 | -0.163 | 0.014  | 0.013  | -0.101 | NA     | 0.03   |
| A008179_01 | -0.136 | -0.209 | -0.28  | -0.264 | -0.172 | -0.203 | 0.301  | 0.227  |
| A008182_01 | 0.284  | 0.343  | -0.115 | -0.024 | NA     | -1.523 | NA     | 0.041  |
| A008183_01 | -0.006 | 0.165  | -0.111 | -0.347 | 0.101  | 0.007  | 0.178  | 0.142  |
| A008184_01 | -0.138 | -0.135 | 0.073  | 0.225  | 0.174  | 0.264  | -0.021 | -0.016 |
| A008191_01 | -0.157 | 0.054  | 0.134  | -0.085 | 0.014  | 0.215  | -0.134 | 0.187  |
| A008198_01 | -0.357 | -0.38  | 0.033  | 0.013  | -0.131 | -0.129 | -0.014 | -0.025 |
| A008201_01 | 0.286  | 0.132  | NA     | 0.016  | -0.228 | -0.424 | 0.208  | 0.147  |
| A008202_01 | -0.144 | -0.144 | 0.004  | 0.038  | -0.01  | 0.14   | 0.169  | 0.236  |
| A008212_01 | -0.261 | -0.135 | -0.21  | -0.158 | -0.798 | -0.441 | -0.302 | 0.049  |
| A008213_01 | 0.082  | -0.02  | -0.063 | 0.192  | 0.029  | 0.039  | 0.121  | 0.127  |
| A008214_01 | 0.081  | 0.344  | -0.728 | -0.68  | 0.401  | 0.51   | 0.428  | 0.575  |
| A008215_01 | 0.461  | 0.41   | -0.005 | NA     | 0.161  | 0.26   | NA     | NA     |
| A008218_01 | 0.122  | -0.125 | -0.061 | -0.173 | 0.04   | -0.057 | 0.029  | 0.074  |
| A008221_01 | NA     | NA     | -0.064 | 0.021  | NA     | -0.249 | NA     | 0.017  |
| A008245_01 | 0.015  | -0.03  | 0.065  | -0.131 | 0.217  | 0.127  | 0.14   | 0.176  |
| A008247_01 | 0.064  | 0.169  | 0.048  | -0.151 | 0.078  | 0.173  | 0.038  | 0.148  |
| A008251_01 | -0.004 | 0.077  | 0.173  | -0.327 | NA     | 0.406  | 0.052  | 0.517  |
| A008252_01 | -0.075 | NA     | -0.437 | -0.545 | 0.205  | 0.245  | 0.224  | 0.128  |
| A008254_01 | -0.565 | NA     | 1.085  | 0.866  | NA     |        | -1.206 | -0.9   |
| A008260_01 | -0.22  | NA     | -0.398 | NA     | -0.156 | 0.052  | NA     | NA     |
| A008262_01 | 0.281  | 0.127  | 0.229  | 0.46   | 0.284  | 0.489  | 0.066  | -0.035 |
| A008268_01 | 0.063  | -0.189 | -0.455 | -0.536 | -0.195 | -0.378 | -0.236 | -0.175 |
| A008270_01 | 0.145  | 0.041  | -0.162 | -0.221 | 0.313  | 0.334  | 0.043  | -0.039 |
| A008271_01 | -0.114 | 0.101  | -0.134 | -0.204 | -0.033 | -0.036 | 0.015  | -0.089 |
| A008272_01 | 0.18   | 0.16   | -0.145 | NA     | 0.305  | 0.375  | NA     | NA     |
| A008277_01 | 0.023  | 0.162  | 0.158  | 0.19   | 0.027  | 0.053  | -0.301 | -0.207 |
| A008280_01 | -0.061 | -0.251 | -0.966 | -1.175 | 0.042  | -0.074 | -0.829 | -0.882 |
| A008281_01 | 0.005  | 0.092  | 0.012  | -0.047 | 0.233  | 0.379  | -0.076 | 0.085  |
| A008283_01 | 0.127  | 0.026  | 0.004  | NA     | 0.265  | 0.568  | 0.049  | NA     |
| A008289_01 | 0.066  | 0.104  | 0.198  | 0.193  | -0.078 | 0.032  | -0.368 | -0.214 |
| A008290_01 | -0.151 | 0.09   | 0.022  | -0.022 | -0.02  | 0.044  | NA     | 0.066  |
| A008291_01 | -0.019 | 0.043  | -0.095 | NA     | -0.026 | 0.079  | NA     | 0.126  |
| A008292_01 | 0.079  | -0.151 | -0.284 | -0.305 | -0.178 | -0.422 | 0.072  | -0.086 |
| A008300_01 | -0.018 | -0.014 | -0.018 | 0.079  | 0.225  | 0.262  | -0.038 | -0.038 |
| A008301_01 | -0.111 | 0.113  | 0.164  | 0.165  | -0.036 | -0.002 | -0.248 | -0.189 |
| A008302_01 | -0.106 | -0.118 | -0.109 | 0.098  | -0.248 | -0.128 | -0.341 | -0.25  |
| A008303_01 | -0.297 | -0.199 | -0.186 | -0.254 | -0.618 | -0.484 | -0.372 | -0.344 |
| A008305_01 | -2.408 | -2.067 | NA     | NA     | -2.198 | -2.499 | NA     | NA     |
| A008308_01 | -0.234 | NA     | 0.003  | 0.083  | -0.366 | -0.449 | -0.088 | -0.176 |
| A008310_01 | -0.093 | 0.052  | -0.317 | NA     | -0.065 | -0.025 | NA     | 0.355  |
| A008312_01 | 0.101  | 0.138  | 0.221  | 0.123  | 0.408  | 0.736  | -0.237 | -0.1   |
| A008313_01 | -0.047 | -0.043 | 0.045  | 0.056  | -0.152 | -0.164 | -0.226 | -0.259 |
| A008314_01 | -0.198 | -0.074 | 0.065  | 0.098  | -0.163 | -0.011 | -0.277 | -0.122 |
| A008315_01 | -0.326 | -0.288 | -0.236 | -0.29  | 0.064  | 0.323  | -0.109 | 0.114  |
| A008321_01 | 0.246  | -0.037 | -0.203 | -0.161 | -0.074 | -0.109 | NA     | 0.113  |
| A008325_01 | -0.248 | -0.228 | -0.09  | -0.071 | -0.373 | -0.254 | -0.152 | 0.028  |
| A008326_01 | -0.108 | 0.026  | 0.223  | 0.294  | -0.064 | 0.086  | -0.457 | -0.339 |
| A008327_01 | -0.193 | 0.002  | 0.058  | 0.003  | -0.172 | -0.04  | -0.237 | -0.12  |
| A008329_01 | -0.114 | -0.13  | -0.09  | -0.195 | 0.154  | 0.074  | 0.226  | 0.073  |
| A008330_01 | 0.347  | 0.344  | -0.005 | -0.186 | 1.055  | 1.056  | 0.469  | 0.436  |
| A008335_01 | -0.46  | NA     | -0.293 | 0.255  | NA     | -0.583 | -0.29  | -0.124 |
| A008336_01 | 0.192  | 0.252  | -0.173 | 0.08   | 0.086  | 0.017  | 0.205  | 0.188  |
| A008338_01 | -0.32  | -0.181 | -0.07  | -0.042 | -0.296 | -0.131 | -0.145 | 0.019  |
| A008339_01 | -0.066 | NA     | 0.002  | 0.01   | -0.031 | 0.022  | NA     | 0.014  |
| A008342_01 | 0.553  | 0.188  | 0.037  | 0.028  | 0.053  | -0.01  | 0.118  | NA     |
| A008350_01 | -0.302 | NA     | -0.393 | NA     | -0.16  | 0.061  | NA     | NA     |
| A008351_01 | -0.061 | -0.023 | -0.186 | 0.111  | -0.092 | -0.013 | NA     | -0.052 |
| A008356_01 | -0.203 | -0.319 | -0.233 | -0.129 | -0.025 | -0.247 | 0.078  | -0.068 |
| A008358_01 | 0.006  | NA     | -0.227 | -0.011 | NA     | 0.073  | NA     | 0.113  |
| A008368_01 | -0.112 | 0.008  | 0.024  | 0.26   | -0.119 | 0.04   | NA     | NA     |
| A008372_01 | 0.368  | NA     | 0.108  | 0.05   | 0.093  | 0.046  | NA     | NA     |
| A008377_01 | -0.065 | -0.244 | -0.136 | -0.069 | 0.037  | 0.055  | 0.175  | 0.202  |
| A008379_01 | -0.119 | NA     | -0.134 | 0.194  | NA     | -0.736 | NA     | 0.013  |
| A008381_01 | 0.02   | NA     | 0.115  | -0.04  | NA     | NA     | NA     | -0.134 |
| A008382_01 | -0.019 | -0.103 | -0.058 | -0.065 | -0.196 | 0.001  | NA     | NA     |
| A008386_01 | 0.071  | -0.019 | 0.281  | 0.364  | 0.036  | -0.012 | -0.326 | -0.389 |
| A008390_01 | 0.163  | 0.144  | 0.166  | -0.002 | 0.008  | 0.126  | -0.172 | -0.124 |



|            |           |          |           |           |           |           |          |        |
|------------|-----------|----------|-----------|-----------|-----------|-----------|----------|--------|
| A008391_01 | 0.268     | 0.262    | -0.323    | -0.25     | -0.09     | -0.274    | 0.227    | 0.163  |
| A008394_01 | -0.001    | 0.092    | 0.14      | 0.229     | 0.106     | -0.083    | 0.042    | -0.076 |
| A008397_01 | -0.146    | 0.009    | 0.173     | 0.055     | 0.156     | 0.213     | 0.07     | 0.311  |
| A008398_01 | -0.005    | -0.172   | -0.057    | -0.162    | -0.09     | -0.22     | 0.099    | 0.179  |
| A008408_01 | 0.219 NA  |          | 0.083     | 0.074 NA  |           | 0.269     | 0.034    | -0.123 |
| A008414_01 | -0.147    | 0.267    | 0.074     | -0.199    | 0.054     | 0.509     | -0.123   | 0.628  |
| A008415_01 | -0.022    | 0.232    | -0.926    | -0.829    | -0.545    | -0.756    | -0.517   | -0.529 |
| A008423_01 | 0.397     | 0.265 NA | NA        |           | -0.51     | -0.571 NA | NA       |        |
| A008432_01 | -0.052    | -0.21    | 0.043     | -0.211    | -0.388    | -0.648    | 0.055    | -0.267 |
| A008441_01 | 0.162     | 0.026    | -0.032    | 0.047     | 0.137     | -0.046    | 0.055    | 0.03   |
| A008445_01 | -0.347    | -0.322   | -0.095    | -0.087    | -0.373    | -0.357    | -0.091   | 0.19   |
| A008446_01 | 0.079     | -0.28    | 0.078     | 0.036     | -0.353    | -0.448    | 0.223    | -0.121 |
| A008448_01 | -0.073    | 0.023    | -0.537    | -0.21     | -0.232    | -0.105    | -0.056   | 0.007  |
| A008449_01 | -0.158    | -0.362   | -0.194    | -0.211    | -0.216    | -0.249    | -0.084   | -0.192 |
| A008452_01 | -0.259    | -0.349   | -0.213    | -0.142    | -1.102    | -0.995 NA |          | -0.042 |
| A008453_01 | 0.222     | 0.111    | -0.11     | -0.056    | -0.137    | -0.288    | -0.111   | -0.039 |
| A008454_01 | 0.212     | 0.064    | -0.326    | -0.368    | 0.305     | 0.1       | 0.26     | 0.165  |
| A008459_01 | 0.064     | 0.273    | -0.139    | 0.059     | 0.132     | 0.392     | 0.113    | 0.151  |
| A008463_01 | 0.342     | 0.223    | 0.139     | 0.088     | 0.472     | 0.358     | 0.276    | 0.203  |
| A008472_01 | -1.212    | -1.11    | 0.956     | 0.826     | 1.316     | 1.716     | 0.332    | 0.228  |
| A008473_01 | -0.169    | -0.156   | -0.032    | -0.04     | -0.102    | -0.091    | 0.095    | 0.265  |
| A008475_01 | 0.081     | -0.039   | -0.355    | -0.229    | 0.003     | -0.088    | -0.502   | -0.574 |
| A008481_01 | 0.401 NA  |          | 0.246     | -0.009 NA | NA        |           | -0.078   | -0.04  |
| A008483_01 | 0.113     | 0.307    | 0.282     | 0.116     | 0.197     | 0.033     | 0.012 NA |        |
| A008485_01 | 0.28      | -0.027   | -0.42     | -0.382    | 0.122     | 0.088 NA  | NA       |        |
| A008486_01 | 0.029     | -0.045   | 0.017     | -0.011    | -0.228    | -0.129    | -0.088   | 0.316  |
| A008499_01 | -0.319 NA |          | -0.055    | -0.089    | -0.466    | -0.406    | -0.131   | 0.103  |
| A008500_01 | 0.23      | 0.196    | 0.201     | 0.058     | 0.419     | 0.396     | 0.143    | 0.086  |
| A008505_01 | -0.165 NA | NA       |           | 0.063 NA  |           | 0.243     | 0.218    | 0.225  |
| A008507_01 | -0.069    | 0.043    | -0.127    | -0.367    | 0.392     | 0.251     | 0.396    | 0.483  |
| A008511_01 | -0.407    | -0.117   | -0.267    | -0.086    | -0.215    | -0.072    | 0.072    | 0.304  |
| A008512_01 | -0.504    | -0.202   | -0.143    | 0.22      | -1.251    | -1.27     | -0.393   | -0.369 |
| A008514_01 | 0.299     | 0.475    | 0.202     | 0.148     | 0.47      | 0.434     | -0.216   | -0.114 |
| A008518_01 | 0.258 NA  |          | 0.402     | 0.501     | 0.346     | 0.155     | -0.351   | -0.585 |
| A008520_01 | 0.401     | 0.134    | -0.223    | -0.094    | 0.103     | 0.047     | -0.037   | -0.33  |
| A008531_01 | -0.039 NA |          | 0.248     | 0.118 NA  | NA        |           | -0.173   | -0.225 |
| A008532_01 | -0.378    | -0.121   | -0.52     | -0.226    | -0.248    | -0.079    | 0.022    | -0.014 |
| A008533_01 | -0.243    | -0.254   | -0.108    | -0.186    | -0.042    | 0.067     | -0.007   | 0.07   |
| A008534_01 | 0.115     | 0.247    | -0.18     | -0.18     | 0.023     | 0.125     | 0.074    | 0.101  |
| A008537_01 | -0.237    | -0.061   | -0.26     | -0.147    | -0.068    | 0.07      | -0.086   | -0.089 |
| A008538_01 | -0.179 NA |          | -0.102    | -0.077 NA | NA        |           | 0.1      | -0.071 |
| A008541_01 | -0.656 NA |          | -0.302 NA |           | -0.786 NA | NA        |          | -0.477 |
| A008544_01 | -0.002    | 0.085    | -0.213    | 0.179     | -0.133    | -0.035    | 0.127    | -0.019 |
| A008545_01 | -0.018 NA |          | 0.485     | 0.28      | 0.174     | 0.053     | -0.186   | -0.201 |
| A008546_01 | 0.435     | 0.258    | -0.121    | -0.024    | 0.059     | -0.063    | 0.02     | -0.069 |
| A008548_01 | -0.262    | -0.527   | 0.201     | 0.271     | -0.257    | -0.281    | -0.621   | -0.443 |
| A008549_01 | -0.743    | -0.756   | -0.381    | -0.216    | -1.227    | -1.35     | -0.219   | -0.347 |
| A008553_01 | -0.554    | -0.425   | 0.129     | 0.45      | -0.473    | -0.257    | 0.069    | 0.062  |
| A008557_01 | -0.094    | 0.176    | -0.06     | -0.169    | 0.162     | 0.137 NA  |          | 0.111  |
| A008562_01 | 0.012     | 0.123    | -1.508    | -1.261    | -1.595    | -1.542    | -1.414   | -1.388 |
| A008564_01 | 0.06      | 0.125    | -0.051    | -0.008    | 0.151     | 0.275     | -0.076   | -0.01  |
| A008571_01 | 0.298     | 0.124    | 0.039     | 0.127     | -0.18     | -0.262    | -0.086   | -0.179 |
| A008572_01 | 0.41 NA   |          | -0.12     | -0.157 NA |           | 0.393     | 0.303    | 0.326  |
| A008573_01 | 0.112     | 0.006    | 0.207     | 0.198     | -0.623    | -0.718    | -0.018   | 0.061  |
| A008575_01 | 0.038     | -0.018   | -0.053    | -0.082    | 0.015     | 0.011     | -0.097   | -0.084 |
| A008576_01 | 0.411     | 0.712    | 0.478     | 0.514     | 0.206     | 0.298     | -0.173   | -0.022 |
| A008578_01 | -0.3      | -0.194   | -0.018    | 0.003     | -0.942    | -1.338    | 0.036    | 0.074  |
| A008580_01 | 0.074     | -0.019   | -0.151    | -0.052    | -0.308    | -0.562    | 0.146    | -0.076 |
| A008582_01 | -0.126    | 0.201    | -0.332    | -0.117    | -0.086    | 0.32      | -0.171   | 0.171  |
| A008583_01 | -0.202    | -0.023   | -0.084    | 0.173     | -0.57     | -0.517 NA | NA       |        |
| A008586_01 | -0.021    | -0.146   | -0.16     | -0.14     | 0.062     | 0.056     | 0.157    | -0.023 |
| A008587_01 | -0.602    | -0.663   | 0.015     | 0.116     | -1.154    | -1.097    | -0.197   | -0.041 |
| A008588_01 | 0.143     | -0.093   | -0.146    | -0.264    | -0.097    | -0.144    | 0.098    | -0.044 |
| A008589_01 | 0.268 NA  | NA       |           | 0.148 NA  | NA        | NA        | NA       |        |
| A008598_01 | -0.095    | -0.152   | -0.319    | -0.098    | 0.394     | 0.511     | 0.313    | 0.181  |
| A008599_01 | -0.007    | -0.183   | 0.173     | 0.164     | 0.068     | 0.17      | 0.006    | -0.158 |
| A008601_01 | -0.312    | -0.093   | 0.266     | 0.165     | -0.326    | -0.575    | -0.882   | -0.655 |
| A008602_01 | 0.385     | 0.261    | -0.526    | -0.397    | -0.152    | -0.366    | 0.027    | 0.016  |

|            |    |        |        |        |        |        |        |        |    |        |
|------------|----|--------|--------|--------|--------|--------|--------|--------|----|--------|
| A008603_01 |    | 0.054  | 0.289  | 0.1    | -0.166 | 0.291  | 0.229  | -0.152 | NA |        |
| A008604_01 |    | 0.038  | 0.213  | -0.171 | -0.061 | -0.208 | -0.343 | 0.187  |    | 0.231  |
| A008605_01 |    | -0.149 | 0.191  | -0.006 | -0.123 | 0.604  | 1.135  | -0.144 |    | 0.353  |
| A008608_01 |    | -0.301 | -0.392 | 0.048  | 0.14   | -0.382 | -0.271 | -0.358 |    | -0.277 |
| A008615_01 |    | 0.062  | 0.051  | 0.138  | -0.001 | -0.493 | -0.558 | -0.532 |    | -0.518 |
| A008616_01 |    | 0.143  | NA     | 0.006  | 0      | NA     | -0.098 | 0.252  |    | 0.058  |
| A008621_01 | NA |        | -0.337 | -0.113 | -0.025 | -0.474 | -0.375 | -0.281 | NA |        |
| A008622_01 |    | -0.213 | NA     | 0.06   | 0.066  | NA     | NA     | -0.098 |    | -0.023 |
| A008627_01 | NA |        | 0.366  | 0.255  | 0.5    | -0.145 | -0.174 | 0.08   |    | -0.004 |
| A008631_01 |    | -0.09  | NA     | 0.267  | 0.364  | NA     | 0.181  | -0.134 |    | -0.219 |
| A008632_01 |    | -0.162 | NA     | -0.224 | 0.037  | NA     | -0.091 | NA     | NA |        |
| A008637_01 |    | 0.113  | -0.018 | -0.392 | -0.45  | -0.31  | -0.276 | 0.083  |    | 0.015  |
| A008638_01 |    | 0.004  | -0.014 | 0.159  | 0.224  | 0.312  | 0.353  | 0.173  |    | 0.087  |
| A008639_01 |    | 0.096  | 0.327  | -0.183 | -0.049 | 0.281  | 0.399  | 0.245  |    | 0.245  |
| A008641_01 |    | 0.094  | 0.056  | -0.211 | 0.021  | 0.155  | 0.236  | 0.085  |    | -0.074 |
| A008644_01 |    | -0.046 | -0.13  | 0      | 0.029  | -0.117 | -0.05  | NA     |    | -0.03  |
| A008645_01 |    | -0.329 | -0.204 | -0.179 | -0.085 | -1.017 | -0.987 | -0.545 |    | -0.268 |
| A008648_01 |    | 0.029  | 0.017  | -0.452 | -0.308 | 0.248  | 0.368  | 0.379  |    | 0.475  |
| A008649_01 |    | 0.1    | 0.252  | 0.132  | 0.038  | -0.589 | -0.954 | 0.038  |    | 0.045  |
| A008651_01 |    | -0.256 | -0.226 | 0.258  | 0.137  | -0.242 | -0.302 | 0.091  |    | 0.196  |
| A008652_01 |    | -0.607 | -0.248 | -0.282 | -0.157 | -0.917 | -0.792 | -0.254 |    | 0.139  |
| A008653_01 |    | 0.086  | -0.09  | -0.115 | 0.019  | -0.071 | -0.077 | 0.056  |    | 0.072  |
| A008654_01 |    | 0.093  | 0.086  | 0.292  | 0.199  | 0.366  | 0.399  | -0.018 |    | 0.132  |
| A008655_01 |    | -0.129 | NA     | 0.171  | 0.138  | -0.291 | -0.243 | NA     |    | -0.164 |
| A008657_01 |    | -0.114 | -0.207 | -0.197 | -0.205 | -0.06  | 0.129  | -0.108 |    | -0.02  |
| A008658_01 |    | 0.591  | 0.525  | -0.545 | -0.319 | 0.104  | 0.192  | 0.453  |    | 0.403  |
| A008660_01 |    | -0.024 | -0.084 | 0.167  | 0.436  | -0.034 | 0.212  | -0.236 |    | -0.149 |
| A008663_01 |    | -0.259 | -0.3   | -0.215 | -0.116 | -1.289 | -1.504 | -0.317 |    | -0.269 |
| A008664_01 |    | 0.241  | 0.219  | -0.477 | -0.482 | 0.313  | 0.64   | -0.178 |    | 0.263  |
| A008667_01 |    | 0.014  | -0.072 | -0.23  | -0.192 | 0.034  | -0.002 | -0.217 |    | -0.215 |
| A008668_01 | NA |        | -0.293 | -0.101 | -0.017 | -0.451 | -0.456 | NA     | NA |        |
| A008670_01 |    | -0.099 | NA     | -0.135 | 0      | 0.115  | -0.009 | NA     | NA |        |
| A008673_01 |    | 0.305  | 0.149  | -0.374 | -0.216 | 0.27   | 0.331  | 0.363  |    | 0.307  |
| A008676_01 |    | 0.072  | NA     | -0.177 | -0.012 | -0.152 | -0.286 | NA     |    | 0.078  |
| A008682_01 |    | -0.172 | -0.178 | 0.003  | 0.088  | -0.325 | -0.274 | -0.115 |    | 0.065  |
| A008685_01 |    | 0.163  | 0.318  | 0.092  | -0.043 | -0.139 | -0.394 | 0.026  |    | -0.037 |
| A008686_01 |    | -0.061 | -0.098 | 0.111  | 0.028  | NA     | -1.074 | -0.247 |    | -0.223 |
| A008692_01 |    | 0.362  | 0.611  | -1.087 | -0.927 | -0.247 | -0.405 | 0.705  |    | 0.918  |
| A008693_01 |    | -0.349 | -0.155 | 0.148  | 0.149  | -0.242 | -0.159 | -0.578 |    | -0.253 |
| A008699_01 |    | -0.065 | NA     | -0.07  | 0.089  | -0.099 | 0.066  | NA     | NA |        |
| A008703_01 |    | 0.065  | -0.084 | -0.116 | 0.083  | -0.247 | -0.4   | -0.017 |    | -0.154 |
| A008707_01 |    | 0.425  | 0.324  | 0.12   | 0.16   | 0.776  | 0.668  | 0.174  |    | 0.222  |
| A008720_01 |    | -0.06  | 0.015  | -0.162 | -0.085 | -0.322 | -0.248 | 0.174  |    | 0.205  |
| A008721_01 |    | -0.187 | 0.011  | 0.172  | 0.26   | -0.237 | -0.21  | NA     | NA |        |
| A008722_01 |    | 0.123  | 0.167  | -0.046 | 0.141  | -0.351 | -0.303 | 0.133  |    | 0.069  |
| A008726_01 |    | -0.223 | -0.107 | -0.355 | -0.278 | -0.31  | -0.375 | 0.257  |    | 0.25   |
| A008727_01 |    | -0.352 | -0.279 | -0.301 | -0.424 | -1.209 | -1.339 | -0.778 |    | -0.597 |
| A008728_01 |    | 0.362  | 0.404  | 0.081  | -0.105 | 0.14   | 0.119  | NA     | NA |        |
| A008731_01 |    | -0.303 | -0.483 | -0.398 | -0.175 | -1.138 | -1.296 | 0.091  |    | 0.101  |
| A008733_01 |    | 0.363  | 0.216  | -0.03  | 0.044  | 0.192  | 0.172  | 0.286  |    | 0.167  |
| A008735_01 |    | 0.338  | 0.341  | 0.312  | 0.142  | 0.278  | 0      | -0.01  |    | -0.003 |
| A008737_01 |    | -0.112 | -0.18  | 0.026  | -0.085 | -0.269 | -0.44  | 0.036  |    | -0.113 |
| A008739_01 |    | 0.128  | NA     | 0.251  | 0.44   | NA     | -0.129 | NA     | NA |        |
| A008742_01 |    | -0.155 | -0.012 | -0.287 | -0.218 | -0.027 | 0.183  | -1.401 |    | -0.91  |
| A008748_01 |    | -0.37  | NA     | -0.195 | NA     | NA     | 1.015  | NA     | NA |        |
| A008752_01 |    | 0.103  | NA     | 0.309  | 0.291  | NA     | NA     | NA     |    | 0.01   |
| A008753_01 |    | -0.06  | NA     | -0.152 | 0.074  | -0.263 | -0.174 | 0.234  |    | -0.086 |
| A008755_01 |    | 0.088  | NA     | -0.223 | -0.158 | NA     | -0.104 | 0.258  |    | -0.048 |
| A008758_01 |    | -0.097 | -0.063 | 0.194  | 0.121  | 0.179  | 0.2    | -0.288 |    | -0.062 |
| A008759_01 |    | 0.047  | -0.018 | -0.191 | -0.131 | -0.043 | -0.029 | 0.014  |    | 0.172  |
| A008762_01 |    | -0.037 | -0.148 | -0.115 | -0.013 | 0.231  | 0.298  | 0.245  |    | 0.373  |
| A008763_01 |    | -0.621 | -0.212 | -0.059 | 0.126  | -0.136 | 0.115  | -0.107 |    | 0.324  |
| A008764_01 |    | 0.237  | NA     | -0.146 | 0.042  | NA     | 0.505  | NA     |    | 0.309  |
| A008775_01 |    | 0.134  | -0.169 | -0.093 | 0.086  | -0.243 | 0.051  | -0.046 |    | -0.243 |
| A008776_01 |    | -0.24  | 0.032  | -0.171 | -0.125 | 0.013  | 0.227  | -0.182 |    | 0.035  |
| A008783_01 |    | 0.092  | 0.018  | -0.265 | -0.028 | -0.402 | -0.319 | -0.045 |    | -0.131 |
| A008784_01 |    | -0.124 | -0.026 | -0.347 | NA     | -0.289 | -0.416 | NA     |    | 0.254  |
| A008790_01 |    | -0.046 | -0.055 | -0.374 | 0.03   | 0.272  | 0.4    | -0.205 |    | -0.406 |

|            |    |           |           |           |           |        |           |           |        |
|------------|----|-----------|-----------|-----------|-----------|--------|-----------|-----------|--------|
| A008793_01 |    | 0.152     | 0.101     | -0.151    | -0.113    | 0.212  | 0.366 NA  | NA        |        |
| A008794_01 |    | 0.036     | 0.378     | -0.135    | 0.055     | -0.48  | -0.551    | 0.026     | 0.23   |
| A008795_01 |    | 0.046     | 0.193     | -0.291    | -0.005    | 0.191  | 0.25      | 0.206     | 0.212  |
| A008798_01 |    | 0.125     | -0.033    | -0.189    | 0.19      | -0.164 | -0.009    | 0.155     | -0.043 |
| A008800_01 |    | -0.01     | 0.158     | 0.075     | 0.317     | 0.046  | 0.147     | -0.004    | 0.059  |
| A008801_01 |    | -0.149    | 0.141     | -0.028    | -0.168    | 0.173  | 0.529     | -0.018    | 0.341  |
| A008803_01 |    | 0.411     | 0.763     | 0.061     | 0.316     | 0.148  | 0.3       | -0.154    | 0.12   |
| A008805_01 |    | -0.116    | -0.083    | -0.351    | -0.29     | 0.141  | 0.425     | -0.119    | 0.092  |
| A008807_01 |    | 0.259     | 0.547     | -0.09     | 0.118     | 0.084  | 0.205     | -0.165    | 0.017  |
| A008810_01 |    | 0.452     | 0.127     | 0.037     | -0.062    | -0.273 | -0.675    | 0.464     | 0.119  |
| A008813_01 |    | 0.241     | 0.109     | -0.107    | 0.054     | 0.045  | -0.143 NA | NA        |        |
| A008814_01 |    | 0.073     | -0.137    | -0.297    | -0.181    | 0.054  | -0.048    | 0.368     | 0.229  |
| A008818_01 |    | -0.434    | -0.622    | 0.883     | 1.083     | 0.282  | 0.504     | -0.717    | -0.506 |
| A008819_01 |    | 0.202     | 0.345     | -0.052    | 0.084     | 0.221  | 0.107     | -0.074    | -0.149 |
| A008821_01 |    | -0.013    | -0.018 NA |           | 0.057     | -0.901 | -0.915 NA | NA        |        |
| A008827_01 |    | -0.222    | 0.115     | -0.175    | -0.125    | -0.033 | 0.191     | 0.045     | 0.213  |
| A008830_01 |    | -0.097    | -0.027    | -0.291    | -0.15     | 0.181  | 0.528     | -0.317    | -0.264 |
| A008835_01 |    | -0.002    | -0.203    | -0.396    | -0.147    | -0.121 | -0.033    | 0.003     | 0.039  |
| A008838_01 |    | -0.054 NA |           | 0.014     | 0.05 NA   |        | 0.313     | 0.207     | 0.359  |
| A008840_01 |    | 0.345     | 0.233     | -0.34     | -0.146    | -0.143 | -0.239    | 0.086     | 0.247  |
| A008842_01 |    | -0.192    | -0.139    | 0.026     | 0.088     | -0.307 | -0.285    | -0.37     | -0.254 |
| A008846_01 |    | 0.172     | 0.234     | 0.008     | 0.051 NA  |        | 0.02      | -0.126 NA |        |
| A008847_01 |    | -0.122    | 0.239     | 0.253     | 0.042     | -0.528 | -0.466    | -0.392    | 0.223  |
| A008855_01 |    | -0.124 NA |           | -0.002    | 0.04 NA   |        | -0.842 NA |           | -0.104 |
| A008857_01 |    | -0.237    | 0.126     | 0.358     | 0.235     | -0.622 | -0.431    | -0.911    | -0.325 |
| A008858_01 | NA |           | 0.179     | -0.117    | -0.083    | 0.173  | 0.124     | -0.111    | -0.02  |
| A008860_01 |    | 0.164 NA  |           | -0.206    | -0.039    | 0.369  | 0.366     | 0.021     | 0.027  |
| A008861_01 |    | -0.481    | -0.714    | 0.346     | 0.427     | 0.893  | 1.154 NA  |           | -0.015 |
| A008862_01 |    | -0.038    | -0.227    | 0.05      | 0.205     | -0.152 | -0.053    | -0.041    | -0.187 |
| A008863_01 |    | -0.04     | -0.162    | 0.16      | 0.386     | -0.063 | 0.007     | 0.08      | 0.029  |
| A008865_01 |    | -0.153    | 0.319     | 0.384     | 0.206     | 0.27   | 0.414     | -0.296    | 0.002  |
| A008867_01 |    | -0.612 NA |           | -0.254    | -0.198    | 0.409  | 0.811     | -0.347    | -0.394 |
| A008872_01 |    | 0.396     | 0.304     | 0.172     | 0.155     | -0.09  | -0.348    | -0.323    | -0.168 |
| A008873_01 |    | 0.257     | 0.554     | -0.382    | -0.422    | -0.745 | -0.868    | -0.642    | -0.224 |
| A008874_01 |    | -0.039    | 0.065     | -0.19     | -0.005    | 0.003  | 0.051     | 0.041     | 0.111  |
| A008877_01 |    | -0.054    | -0.13     | -0.147    | -0.17     | 0.013  | 0.069     | -0.087    | -0.048 |
| A008878_01 |    | 0.261     | -0.171    | -0.289    | -0.182    | -0.247 | -0.002    | 0.045     | 0.213  |
| A008880_01 |    | 0.006     | -0.127    | -0.132    | 0.077     | -0.18  | -0.065 NA |           | 0.082  |
| A008881_01 |    | -0.423    | -0.506    | -0.028    | -0.14     | -0.627 | -0.637    | -0.371    | -0.345 |
| A008882_01 |    | 0.036     | -0.047    | -0.054    | -0.01     | 0.361  | 0.389     | 0.152     | 0.214  |
| A008883_01 | NA |           | -0.784    | 0.019     | 0.043     | -1.026 | -1.101    | -0.263    | -0.298 |
| A008889_01 |    | -0.431 NA |           | -0.36     | -0.318 NA |        | 0.464     | 0.121     | 0.158  |
| A008890_01 |    | 0.057     | 0.186     | -0.338 NA |           | -0.094 | -0.069 NA | NA        |        |
| A008896_01 |    | -0.051 NA |           | -0.067    | 0.049 NA  |        | -0.34 NA  |           | -0.009 |
| A008899_01 |    | 0.197     | -0.028    | 0.331     | 0.254     | 0.186  | 0.139 NA  | NA        |        |
| A008904_01 |    | -0.442    | -0.156    | -0.029    | -0.036    | -1.37  | -1.488    | -0.307    | -0.249 |
| A008906_01 |    | 0.41      | 0.245     | 0.291     | 0.033     | 0.152  | -0.035    | -0.179    | -0.294 |
| A008909_01 |    | -0.16     | 0.033     | -0.118    | -0.164    | -0.021 | 0.07      | 0.23      | 0.282  |
| A008913_01 |    | 0.072     | 0.009     | 0.051     | 0.122     | -0.892 | -1.006    | -0.096    | -0.101 |
| A008919_01 |    | -0.096 NA | NA        | NA        |           | 0.242  | 0.603 NA  | NA        |        |
| A008920_01 |    | -0.579    | -0.655    | -0.582    | -0.535    | -0.836 | -0.833    | -0.555    | -0.47  |
| A008922_01 |    | -0.174    | 0.079     | -0.356    | -0.269    | 0.015  | -0.034    | 0.029     | -0.139 |
| A008924_01 |    | 0.273     | 0.347     | -0.442    | -0.118    | -0.03  | 0.107     | -0.215    | -0.299 |
| A008926_01 |    | -0.196    | -0.057    | 0.264     | 0.296     | -0.69  | -0.671    | -0.357    | -0.133 |
| A008929_01 |    | -0.119    | -0.071    | -0.087 NA |           | -0.325 | -0.317 NA | NA        |        |
| A008933_01 |    | 0.046     | 0.236     | 0.029     | 0.074     | 0.152  | 0.108     | -0.278    | -0.282 |
| A008934_01 |    | -0.04     | -0.044    | 0.093     | 0.116     | -0.532 | -0.745    | -0.159    | -0.214 |
| A008936_01 |    | 0.316     | -0.017    | -0.124    | -0.016    | 0.154  | 0.244     | 0.255     | 0.335  |
| A008937_01 |    | -0.127    | -0.182    | -0.218    | -0.065    | -0.915 | -0.999    | -0.282    | -0.143 |
| A008938_01 |    | 0.189 NA  |           | 0.053     | 0.127 NA  |        | -0.237    | 0.051     | -0.039 |
| A008939_01 |    | 0.072     | 0.163     | 0.134     | 0.071     | -0.581 | -0.821    | 0.042     | 0.053  |
| A008944_01 |    | -0.243    | -0.129    | -0.207    | -0.045    | -0.508 | -0.354    | -0.361    | -0.084 |
| A008945_01 |    | 0.076     | 0.021     | -0.103    | 0.048     | -0.112 | 0.093     | -0.061    | -0.05  |
| A008949_01 |    | 0.085     | 0.123     | -0.095    | 0.084     | -0.108 | 0.023     | -0.059    | 0.132  |
| A008950_01 |    | -0.003    | 0.039     | -0.158    | 0.099     | 0.261  | 0.341     | 0.148     | 0.036  |
| A008952_01 |    | -0.638    | -0.529    | -0.454    | -0.457    | -0.142 | 0.188     | 0.014     | 0.249  |
| A008953_01 |    | -0.171    | -0.151    | 0.128     | 0.246     | -0.017 | 0.042     | 0.025     | 0      |
| A008955_01 |    | 0.093     | 0.198     | -0.514    | -0.258    | 0.048  | 0.223     | -0.494    | -0.305 |

|            |    |           |           |           |           |        |           |        |        |
|------------|----|-----------|-----------|-----------|-----------|--------|-----------|--------|--------|
| A008958_01 |    | 0.312     | 0.52      | -0.139    | -0.183    | 0.419  | 0.531     | 0.303  | 0.451  |
| A008961_01 |    | -0.218    | 0.231     | 0.176     | 0.206     | 0.333  | 0.712     | -0.316 | 0.233  |
| A008963_01 |    | 0.198     | 0.14      | -0.105    | -0.014    | 0.322  | 0.399     | 0.111  | 0.175  |
| A008965_01 |    | 0.236     | 0.305     | -0.221    | -0.02     | -0.004 | 0.037     | 0.037  | 0.151  |
| A008967_01 |    | 0.073     | 0.084     | -0.156    | -0.146    | 0.109  | 0.084     | -0.089 | 0.004  |
| A008969_01 |    | -0.198    | -0.172    | -0.03     | -0.302    | -0.611 | -0.726    | -0.417 | -0.088 |
| A008972_01 |    | 0.335 NA  |           | -0.535 NA |           | 0.161  | 0.16 NA   | NA     |        |
| A008973_01 |    | 0.017 NA  |           | -0.028 NA |           | 0.028  | -0.036 NA |        | -0.062 |
| A008974_01 |    | -0.324    | -0.059    | -0.127    | -0.292    | 0.108  | 0.356     | -0.002 | 0.463  |
| A008975_01 |    | -0.142    | 0.042     | -0.081    | -0.294    | -0.092 | -0.086    | 0.093  | 0.145  |
| A008980_01 |    | -0.433    | -0.201    | -0.603    | -0.509    | 0.032  | 0.269     | -0.152 | 0.24   |
| A008981_01 |    | 0.085     | 0.046     | 0.21      | 0.137     | 0.01   | -0.124 NA |        | 0.035  |
| A008983_01 |    | 0.163     | -0.108    | -0.083    | 0.242     | -0.142 | 0.042     | -0.635 | -0.597 |
| A008984_01 | NA | NA        |           | 0.083     | 0.095 NA  |        | -0.206 NA |        | -0.055 |
| A008985_01 |    | 0.246     | 0.224     | 0.076     | 0.235     | 0.146  | 0.197     | 0.225  | 0.051  |
| A008988_01 |    | -0.362    | -0.263    | -0.039    | 0.121     | -0.08  | -0.075    | 0.063  | -0.008 |
| A008989_01 |    | -0.005    | 0.135     | 0.157     | 0.052     | 0.464  | 0.499     | 0.134  | 0.418  |
| A008992_01 |    | -0.206    | 0.236     | 0.04      | 0.013     | 0.105  | 0.158     | 0.172  | 0.246  |
| A008995_01 |    | 0.05      | 0.047     | -0.176    | -0.117    | 0.355  | 0.535     | 0.114  | 0.378  |
| A008997_01 | NA | NA        |           | -0.026    | 0.088     | 0.462  | 0.558     | 0.238  | 0.307  |
| A008999_01 |    | 0.047     | 0.052     | -0.043    | 0.072     | 0.093  | 0.122     | -0.272 | -0.251 |
| A009005_01 |    | 0.127     | 0.363     | -0.019    | -0.199    | -0.049 | -0.084    | -0.065 | 0.092  |
| A009011_01 |    | -0.861    | -0.917    | -1.128    | -0.804    | -0.383 | -0.516    | -0.913 | -1.027 |
| A009014_01 |    | -0.044    | -0.036    | 0.146     | 0.238     | -0.129 | 0.049     | -0.377 | -0.386 |
| A009016_01 |    | 0.03      | -0.079    | 0.277     | 0.168     | -0.637 | -1.083 NA |        | -0.148 |
| A009021_01 |    | 0.111     | 0.025     | -0.131 NA |           | 0.109  | 0.297 NA  |        | 0.037  |
| A009022_01 |    | 0.27      | 0.256     | 0.075     | 0.138     | 0.251  | 0.117     | 0.025  | -0.078 |
| A009026_01 |    | 0.289 NA  |           | 0.16      | 0.332     | 0.007  | -0.159 NA |        | -0.196 |
| A009028_01 |    | -0.028    | 0.09      | -0.178    | 0.063     | -0.766 | -0.912    | 0.034  | 0.051  |
| A009031_01 |    | -0.272    | -0.345    | -0.248    | -0.189    | -1.161 | -1.201    | -0.483 | -0.26  |
| A009033_01 |    | -0.007    | -0.096    | -0.224    | -0.064    | 0.055  | 0.184     | -0.103 | -0.166 |
| A009036_01 |    | -0.02     | 0.13      | 0.318     | 0.337     | 0.213  | 0.252     | -0.22  | -0.409 |
| A009037_01 |    | 0.006 NA  |           | 0.368     | 0.321     | -0.55  | -0.704    | -0.645 | -0.676 |
| A009044_01 |    | 0.102     | 0.083     | -0.268    | 0.135     | -0.116 | -0.03     | -0.013 | -0.156 |
| A009049_01 |    | 0.469     | 0.224     | -0.275 NA |           | -0.296 | -0.227 NA |        | 0.06   |
| A009052_01 |    | 0.005     | -0.077    | 0.102     | 0.255     | 0.084  | 0.123     | 0.018  | 0.048  |
| A009055_01 |    | 0.194 NA  |           | -0.083 NA |           | 0.238  | 0.25 NA   |        | 0.175  |
| A009056_01 |    | -0.016    | 0.075     | -0.208    | -0.083    | -0.086 | 0.061     | 0.008  | 0.236  |
| A009060_01 |    | 0.183     | 0.004     | -0.287    | -0.128    | -0.107 | -0.058    | -0.078 | -0.212 |
| A009064_01 |    | -0.075    | 0.321     | -0.172    | -0.223    | 0.017  | 0.182     | 0.098  | 0.485  |
| A009072_01 |    | -0.08     | 0.033     | -0.162 NA |           | 0.009  | 0.347 NA  | NA     |        |
| A009073_01 |    | 0.243 NA  |           | -0.037    | 0.047 NA  | NA     | NA        |        | 0.006  |
| A009076_01 |    | -0.079    | 0.047     | -0.238    | -0.06     | 0.005  | 0.093     | -0.076 | 0.094  |
| A009077_01 |    | 0.311     | 0.469     | 0.456     | 0.291     | 0.218  | 0.012     | -0.005 | -0.014 |
| A009081_01 |    | 0.204     | 0.098     | 0.1       | 0.136     | 0.352  | 0.455     | -0.352 | -0.257 |
| A009087_01 |    | -1.534    | -1.21     | 0.976     | 1.1       | -0.733 | -0.733    | -1.215 | -1.079 |
| A009088_01 |    | 0.049     | 0.061     | 0.077     | 0.077     | -0.63  | -0.83     | -0.32  | -0.325 |
| A009095_01 | NA | NA        |           | -0.366    | -0.061 NA |        | -0.516    | 0.005  | -0.208 |
| A009099_01 |    | -0.059    | -0.208    | -0.148    | 0.017     | -0.088 | -0.108    | -0.115 | -0.111 |
| A009102_01 |    | -0.27     | -0.256    | 0.07      | 0.108     | -0.584 | -0.608    | -0.181 | -0.353 |
| A009105_01 |    | 0.251     | 0.083     | 0.142     | 0.166     | 0.436  | 0.497 NA  |        | -0.088 |
| A009106_01 |    | 0.053     | 0.138     | -0.36     | -0.24     | -0.262 | -0.323    | -0.243 | -0.101 |
| A009107_01 |    | 0.61      | 0.787     | -0.014    | 0.126     | -0.943 | -1.524    | -0.998 | -1.087 |
| A009112_01 |    | -0.047    | 0.407     | 0.211     | 0.437     | -0.199 | -0.364 NA | NA     |        |
| A009113_01 |    | -0.146 NA |           | -0.327    | 0.1       | -0.022 | 0.039     | -0.188 | -0.074 |
| A009114_01 |    | 0.149     | 0.147     | 0.051     | 0.166     | 0.116  | 0.051     | 0.188  | 0.179  |
| A009121_01 |    | 0.215 NA  |           | -0.427    | -0.179 NA |        | -0.207    | 0.324  | 0.018  |
| A009127_01 |    | -0.535 NA |           | 0.172     | 0.231 NA  |        | -0.678    | 0.077  | 0.102  |
| A009134_01 |    | 0.107     | -0.148 NA | NA        |           | -0.061 | -0.048 NA | NA     |        |
| A009138_01 |    | -0.31     | -0.25     | 0.275     | 0.158     | 0.008  | 0.029     | -0.513 | -0.332 |
| A009139_01 |    | -0.165    | 0.066     | 0.384     | 0.399     | -0.515 | -0.532    | 0.012  | 0.34   |
| A009145_01 |    | -0.06     | -0.111    | -0.162    | -0.117    | 0.161  | 0.243     | -0.048 | -0.05  |
| A009147_01 |    | -0.687    | -0.545    | -0.131    | 0.095     | -1.655 | -1.791    | -0.673 | -0.562 |
| A009148_01 |    | -0.314    | -0.379    | 0.19      | 0.118     | -0.557 | -0.67     | -0.097 | 0.024  |
| A009151_01 |    | 0.191 NA  |           | -0.063    | 0.144 NA  | NA     | NA        |        | 0.138  |
| A009152_01 |    | 0.23      | 0.091     | 0.034     | -0.069    | -0.387 | -0.659    | 0.266  | 0.068  |
| A009153_01 |    | -0.216    | 0.253     | 0.192     | 0.019     | 0.223  | 0.143     | -0.047 | -0.094 |
| A009156_01 |    | -0.552 NA |           | 0.006     | -0.053    | -0.479 | -0.344 NA |        | -0.056 |

|            |    |           |          |           |           |          |           |           |        |
|------------|----|-----------|----------|-----------|-----------|----------|-----------|-----------|--------|
| A009163_01 |    | -0.06     | -0.003   | 0.168     | 0.042     | 0.063    | 0.096     | 0.037     | 0.112  |
| A009165_01 |    | -0.236    | -0.196   | -0.401    | -0.223    | -0.695   | -0.963    | -0.046    | -0.32  |
| A009169_01 |    | -0.634 NA |          | -0.823    | -0.631 NA | NA       | NA        |           | -0.044 |
| A009176_01 |    | 0.094     | 0.111    | -0.092    | 0.047     | 0.251    | 0.228     | 0.291     | 0.237  |
| A009182_01 |    | 0.329     | 0.318    | 0.047     | -0.157    | 0.212 NA | NA        |           | 0.057  |
| A009187_01 |    | 0.369     | 0.593    | 0.192     | 0.149     | 0.816    | 1.088     | -0.119    | 0.08   |
| A009189_01 |    | -0.085    | -0.25    | 0.275 NA  |           | -0.6     | -0.588 NA | NA        |        |
| A009196_01 |    | -0.174    | -0.254   | -0.093    | -0.075    | -0.644   | -0.894    | -0.218    | -0.178 |
| A009203_01 |    | -0.205    | -0.099   | 0.208     | -0.141    | 0.116    | -0.111    | -0.098    | 0.017  |
| A009205_01 |    | 0.536     | 0.478 NA | NA        |           | -0.047   | -0.046 NA | NA        |        |
| A009221_01 |    | 0.306     | 0.066    | -0.391    | -0.223    | -0.32    | -0.102    | 0.192     | 0.009  |
| A009227_01 |    | 0.008     | 0.018    | -0.173    | 0.119     | 0.216    | 0.577     | 0.182     | 0.263  |
| A009233_01 |    | 0.122     | 0.154    | -0.266    | -0.238    | 0.201    | 0.54 NA   |           | 0.07   |
| A009248_01 |    | -0.039 NA |          | -0.139    | -0.209 NA |          | 0.122 NA  |           | -0.019 |
| A009255_01 |    | -0.659    | -0.424   | -0.197    | -0.113    | 0.129    | 0.142     | 0.304     | 0.3    |
| A009256_01 |    | -0.39     | -0.352   | -0.185    | 0.091     | -1.384   | -1.591    | -0.372    | -0.634 |
| A009257_01 |    | 0.061 NA  |          | -0.245    | -0.198    | -0.254   | -0.26 NA  |           | -0.003 |
| A009260_01 |    | 0.039     | 0.096    | -0.474    | -0.288    | -0.526   | -0.612    | -0.216 NA |        |
| A009262_01 |    | -0.092    | 0.034    | -0.124    | -0.289    | -0.034   | -0.149    | 0.099     | 0.065  |
| A009270_01 |    | -0.098 NA |          | 0.439     | 0.308 NA  |          | -0.233 NA | NA        |        |
| A009272_01 |    | 0.164     | 0.533    | 0.089     | 0.121     | 0.189    | 0.276     | -0.312    | 0.077  |
| A009273_01 |    | 0.079     | -0.087   | 0.08      | 0.004     | 0.041    | -0.039    | 0.161     | 0.025  |
| A009281_01 | NA | NA        |          | -0.309    | -0.092 NA |          | -0.148    | 0.176     | 0.009  |
| A009282_01 |    | 0.282     | -0.157   | 0.195     | 0.154     | -0.037   | -0.331    | 0.133     | -0.099 |
| A009284_01 |    | -0.055 NA |          | 0.2       | 0.052     | -0.292   | -0.44     | -0.217    | -0.135 |
| A009289_01 |    | 0.086     | -0.005   | -0.337    | -0.357    | 0.217    | 0.077     | 0.478     | 0.418  |
| A009293_01 |    | 0.156     | -0.024   | -0.199    | -0.108    | 0.212    | 0.286     | 0.121     | 0.092  |
| A009296_01 |    | 0.218     | 0.432    | -0.071    | -0.092    | 0.083    | 0.075     | -0.099    | 0.012  |
| A009303_01 |    | -0.222    | -0.135   | 0.057     | 0.102     | 0.302    | 0.489     | 0.145     | 0.268  |
| A009305_01 |    | 0.207 NA  |          | -0.133    | -0.014    | -0.362   | -0.465    | -0.256    | -0.297 |
| A009307_01 |    | -0.39     | -0.332   | -0.312    | -0.142    | -0.985   | -1.016    | -0.36     | -0.408 |
| A009309_01 |    | 0.037     | -0.025   | -0.132    | 0.016     | 0.104    | 0.091 NA  | NA        |        |
| A009312_01 |    | 0.256     | 0.091    | 0.032     | -0.034    | 0.144    | -0.027    | 0.064     | 0.008  |
| A009325_01 |    | -1.204    | -0.904   | -0.218    | -0.36     | -1.076   | -1.028    | 0.356     | 0.536  |
| A009328_01 |    | 0.103     | 0.206    | -0.058    | 0.02      | -0.272   | -0.383    | -0.289    | -0.23  |
| A009340_01 |    | -0.353    | -0.705   | -0.12     | -0.019    | -0.926   | -0.854 NA |           | -0.303 |
| A009343_01 |    | 0.078     | 0.157    | -0.017    | -0.268    | 0.154    | 0.182     | -0.066    | 0.056  |
| A009348_01 |    | -0.07 NA  |          | -0.071    | -0.01     | -0.008   | -0.183    | 0.045     | 0.048  |
| A009353_01 |    | -0.432    | -0.085   | -0.006    | 0.147     | 0.046    | 0.404     | -0.123    | 0.376  |
| A009354_01 |    | -0.244    | -0.025   | -0.261    | -0.289    | -0.062   | 0.043     | 0.088     | 0.134  |
| A009368_01 |    | 0.111     | -0.016   | -0.019    | 0.102     | 0.268    | 0.35      | 0.292     | 0.146  |
| A009369_01 | NA |           | -0.203   | -0.083    | -0.164    | -0.73    | -0.655    | -0.275    | -0.295 |
| A009370_01 |    | 0.221     | 0.14     | 0.126     | 0.225     | 0.146    | 0.002     | -0.06     | -0.034 |
| A009371_01 |    | 0.025     | 0.051    | 0.44      | 0.54      | -0.056   | -0.29     | -0.116    | -0.288 |
| A009375_01 |    | 0.309     | 0.129    | -0.193    | -0.102    | 0.052    | 0.152     | 0.041     | -0.091 |
| A009377_01 |    | 0.252 NA  |          | 0.149     | 0.134 NA  | NA       | NA        |           | -0.115 |
| A009378_01 |    | 0.049     | 0.117    | -0.172    | -0.241    | 0.02     | 0.095     | 0.09      | 0.176  |
| A009380_01 |    | 0.286 NA  |          | -0.215    | -0.18     | 0.23     | 0.268 NA  |           | 0.008  |
| A009390_01 |    | -0.097    | -0.154   | -0.025    | 0.031     | 0.072    | 0.178     | 0.048     | -0.003 |
| A009396_01 |    | 0.066 NA  |          | 0.325 NA  | NA        | NA       | NA        | NA        |        |
| A009398_01 |    | 0.252 NA  |          | 0.169     | 0.381     | 0.204    | 0.184     | 0.048     | -0.047 |
| A009399_01 |    | 0.107     | 0.199    | 0.221     | -0.023    | 0.393    | 0.528     | 0.09      | 0.207  |
| A009402_01 |    | 0.232 NA  |          | -0.153 NA | NA        |          | 0.062 NA  | NA        |        |
| A009409_01 |    | -0.155 NA |          | 0.063     | 0.141     | 0.838    | 0.99      | 0.447     | 0.391  |
| A009410_01 |    | -0.651    | 0.077    | -0.042    | -0.113    | -0.031   | 0.548     | -0.126    | 0.741  |
| A009411_01 |    | 0.032     | 0.076    | 0.158     | 0.043     | -0.178   | -0.47     | 0.073     | -0.091 |
| A009413_01 |    | -0.983 NA |          | -0.921 NA |           | -0.053   | 0.009 NA  | NA        |        |
| A009414_01 |    | -0.45     | -0.33    | 0.02      | -0.031    | 0.032    | 0.181     | 0.057     | 0.188  |
| A009415_01 |    | -0.008 NA |          | -0.179 NA | NA        |          | 0.01 NA   | NA        |        |
| A009426_01 |    | 0.111     | 0.089    | 0.593     | 0.658     | 0.937    | 1.096     | 0.329     | 0.225  |
| A009431_01 |    | -0.714 NA |          | 0.036     | 0.294 NA  |          | -0.539 NA | NA        |        |
| A009432_01 |    | -0.244 NA |          | -0.175    | -0.216 NA |          | -0.363 NA |           | -0.099 |
| A009434_01 |    | 0.202     | 0.305    | -0.045    | 0.136     | -0.215   | -0.335    | 0.067 NA  |        |
| A009435_01 |    | -0.095    | 0.02     | -0.134    | -0.069    | -0.108   | 0.254 NA  |           | 0.304  |
| A009448_01 |    | 0.281     | 0.254    | 0.147     | 0.082     | 0.169    | 0.229     | 0.02      | 0.152  |
| A009454_01 |    | -0.066 NA |          | -0.221    | -0.056    | -0.549   | -0.612 NA |           | -0.164 |
| A009457_01 |    | -0.276 NA |          | -0.295    | -0.175 NA |          | -0.107    | 0.221     | 0.229  |
| A009475_01 |    | 0.156     | 0.055    | -0.167    | -0.12     | 0.116    | 0.211     | 0.071     | 0.036  |

|            |    |           |           |           |           |        |           |        |        |
|------------|----|-----------|-----------|-----------|-----------|--------|-----------|--------|--------|
| A009480_01 |    | -0.025    | -0.225    | -0.01     | 0.008     | -0.632 | -1.002    | -0.013 | -0.285 |
| A009485_01 |    | 0.248 NA  |           | 0.2       | 0.019 NA  | NA     |           | 0.147  | 0.016  |
| A009491_01 | NA | NA        |           | 0.132 NA  |           | -0.034 | -0.01 NA  |        | 0.069  |
| A009495_01 | NA |           | -0.384    | 0.019     | -0.02     | -0.342 | -0.408    | -0.009 | 0.073  |
| A009496_01 |    | 0.198 NA  |           | -0.293    | -0.178 NA |        | -0.628 NA |        | -0.197 |
| A009497_01 |    | -0.091 NA |           | 0.839     | 0.737     | 0.56   | 0.633     | -0.261 | -0.334 |
| A009498_01 |    | -0.488    | -0.504    | -0.176    | 0.105     | -0.649 | -0.609    | -0.039 | 0.124  |
| A009501_01 |    | 0.403     | 0.473     | -0.061    | -0.016    | 0.725  | 1.005     | 0.254  | 0.31   |
| A009502_01 | NA | NA        |           | 0.401     | 0.279 NA  | NA     |           | 0.14   | 0.108  |
| A009506_01 |    | -0.052    | -0.132    | -0.336    | -0.185    | 0.128  | 0.221     | 0.184  | -0.029 |
| A009507_01 |    | 0.474 NA  |           | 0.089     | -0.005 NA | NA     |           | 0.251  | 0.062  |
| A009512_01 |    | 0.192     | 0.263     | -0.057    | 0.033     | -0.502 | -0.586    | -0.031 | 0.153  |
| A009513_01 |    | 0.075 NA  |           | -0.474    | -0.24     | -0.212 | -0.116 NA |        | -0.13  |
| A009514_01 |    | 0.263 NA  |           | 0.54      | 0.365     | -0.739 | -0.84     | -0.15  | -0.069 |
| A009515_01 |    | -0.93     | -1.079    | -2.215    | -2.037    | 0.242  | 0.735     | -1.201 | -1.049 |
| A009517_01 |    | 0.227     | 0.13      | 0.318     | 0.465     | -0.391 | -0.353    | -0.326 | -0.421 |
| A009523_01 |    | 0.217     | 0.191     | 0.351     | 0.157     | 0.09   | 0.068     | -0.023 | -0.115 |
| A009525_01 |    | 0.854     | 0.646     | 0.265     | 0.004     | 0.235  | 0.181     | -0.147 | -0.391 |
| A009530_01 |    | -0.095    | -0.096    | -0.059    | -0.04     | 0.065  | -0.187    | 0.118  | 0.15   |
| A009531_01 |    | -0.159    | -0.276    | -0.277    | -0.275    | -0.083 | -0.228    | 0.152  | -0.032 |
| A009534_01 |    | 0.038     | 0.176     | 0.273     | 0.19      | 0.051  | -0.082    | -0.525 | -0.401 |
| A009537_01 |    | 0.198 NA  |           | 0.351     | 0.298     | 0.89   | 0.813     | 0.234  | 0.223  |
| A009540_01 |    | 0.359 NA  |           | -0.262 NA | NA        |        | -0.184 NA | NA     |        |
| A009542_01 |    | 0.205 NA  |           | 0.135     | 0.15 NA   | NA     | NA        |        | -0.01  |
| A009543_01 |    | -0.19     | -0.191    | -0.157    | 0.005     | -1.04  | -0.869    | -0.49  | -0.351 |
| A009544_01 |    | -0.257    | -0.401 NA | NA        |           | 0.499  | 0.684 NA  | NA     |        |
| A009545_01 |    | 0.036 NA  |           | -0.092    | 0.253     | 0.137  | 0.079 NA  | NA     |        |
| A009548_01 |    | 0.236 NA  |           | 0.024     | 0.184 NA  |        | -0.019    | -0.096 | -0.285 |
| A009549_01 |    | 0.059     | -0.101    | 0.276     | 0.023     | 0.22   | 0.004     | -0.044 | -0.053 |
| A009551_01 |    | 0.12      | 0.551     | -0.05     | -0.114    | 0.245  | 0.346     | 0.06   | 0.33   |
| A009557_01 |    | -0.167    | -0.211    | 0.279     | -0.017    | 0.733  | 0.848     | -0.229 | -0.382 |
| A009560_01 |    | 0.295     | -0.121    | 0.039     | -0.22     | 0.224  | 0.043     | 0.265  | 0.055  |
| A009561_01 |    | 0.158 NA  |           | -0.042    | -0.02 NA  | NA     |           | 0.113  | 0.076  |
| A009563_01 |    | -0.176    | -0.245    | -0.324    | -0.153    | -0.177 | -0.147    | 0.152  | 0.124  |
| A009566_01 |    | 0.091     | -0.058    | 0.098     | 0.166     | -0.326 | -0.281    | -0.126 | -0.398 |
| A009567_01 |    | -0.027    | -0.071    | -0.058    | -0.01     | -0.006 | 0.19      | -0.154 | -0.004 |
| A009568_01 |    | -0.101 NA |           | -0.653    | -0.323    | -0.893 | -0.984 NA |        | -0.599 |
| A009573_01 |    | 0.204     | 0.187     | 0.303     | 0.198     | 0.22   | 0.309     | 0.088  | 0.059  |
| A009579_01 |    | -0.007    | -0.137    | -0.026    | -0.013    | 0.147  | 0.193     | 0.095  | 0.011  |
| A009580_01 |    | -0.301    | 0.047     | -0.506    | -0.103    | 0.082  | 0.208     | 0.126  | 0.396  |
| A009581_01 |    | -0.276 NA |           | 0.424     | 0.337     | 0.047  | -0.059    | -0.055 | 0.01   |
| A009583_01 |    | 0.059     | 0.133     | -0.203    | -0.078    | 0.404  | 0.62      | 0.247  | 0.206  |
| A009590_01 |    | 0.241     | 0.389     | 0.586     | 0.395     | 0.298  | 0.113     | -0.497 | -0.431 |
| A009594_01 |    | 0.422     | 0.389     | -0.083 NA |           | 0.084  | 0.057 NA  | NA     |        |
| A009595_01 |    | 0.273     | 0.087     | 0.134     | 0.166     | 0.149  | 0.359 NA  | NA     |        |
| A009603_01 |    | -0.19     | -0.264    | -1.12     | -1.061    | -0.007 | 0.081     | 0.035  | 0.12   |
| A009609_01 |    | -0.006 NA |           | -0.215    | -0.007    | -0.054 | 0.059 NA  |        | -0.445 |
| A009611_01 |    | -0.176    | -0.058    | 0.169     | 0.047     | -0.03  | -0.071    | -0.053 | -0.117 |
| A009614_01 |    | -0.081    | -0.144 NA |           | 0.131     | 0.058  | 0.087     | -0.111 | 0      |
| A009618_01 | NA |           | -0.422    | -0.606    | -0.217    | -1.248 | -1.383 NA | NA     |        |
| A009619_01 |    | 0.308     | 0.233     | -0.241    | -0.09     | -0.148 | -0.128    | -0.039 | -0.063 |
| A009625_01 |    | -0.14 NA  |           | -0.023    | 0.146 NA  |        | 0.053 NA  | NA     |        |
| A009627_01 |    | -0.652    | -0.884    | 0.457     | 0.476     | -0.01  | 0.133     | -0.113 | -0.084 |
| A009632_01 |    | -0.094 NA | NA        |           | 0.085 NA  | NA     | NA        |        | -0.048 |
| A009633_01 |    | -0.06     | -0.118    | 0.302     | 0.216     | 0.401  | 0.456     | -0.045 | 0.111  |
| A009639_01 |    | 0.042 NA  |           | -0.254    | -0.023    | -0.031 | -0.016 NA |        | 0.183  |
| A009641_01 |    | 0.184     | 0.198     | -0.168    | -0.188    | 0.202  | 0.325     | -0.042 | 0.115  |
| A009660_01 |    | -0.16     | -0.264    | 0.317     | 0.173     | 0.665  | 0.744     | 0.088  | 0.234  |
| A009661_01 |    | -0.001    | -0.177    | -0.093    | -0.14     | -0.212 | -0.21 NA  | NA     |        |
| A009663_01 |    | 0.14 NA   |           | 0.152     | 0.211 NA  |        | -0.047 NA |        | 0.039  |
| A009665_01 |    | 0.135     | 0.653     | 0.066     | 0.096     | 0.232  | 0.569     | -0.143 | 0.3    |
| A009670_01 |    | -0.175    | -0.141    | 0.071     | 0.077     | 0.071  | 0.012     | -0.031 | -0.163 |
| A009676_01 | NA |           | -0.025    | -0.281    | -0.135    | -0.639 | -0.622    | -0.265 | -0.061 |
| A009682_01 |    | 0.018     | -0.223    | -0.128    | -0.028    | -0.167 | -0.048    | -0.094 | 0.012  |
| A009684_01 | NA |           | -0.449    | 0.073     | 0.26      | -0.388 | -0.341    | 0.049  | 0.042  |
| A009688_01 |    | 0.008 NA  |           | 0.11      | 0.256 NA  |        | -0.494 NA | NA     |        |
| A009691_01 |    | 0.39      | 0.257     | 0.275     | 0.32      | 0.359  | 0.269     | 0.138  | 0.114  |
| A009693_01 |    | -0.038 NA |           | 0.163     | 0.109     | 0.06   | 0.064     | 0.05   | 0.06   |

|            |    |           |        |           |           |           |           |           |        |
|------------|----|-----------|--------|-----------|-----------|-----------|-----------|-----------|--------|
| A009699_01 |    | 0.115 NA  | NA     |           | 0.095 NA  |           | -0.037 NA | NA        |        |
| A009711_01 |    | 0.117     | -0.032 | -0.081    | 0.04      | -0.272    | -0.317    | -0.063    | -0.158 |
| A009713_01 |    | 0.316     | -0.122 | 0.319     | -0.065    | -0.426    | -1.009    | 0.354     | -0.03  |
| A009728_01 |    | 0 NA      |        | -0.344 NA |           | 0.271     | 0.455 NA  |           | 0.54   |
| A009731_01 |    | 0.457     | 0.005  | -0.127    | -0.191 NA |           | -0.377    | 0.136     | 0.187  |
| A009733_01 |    | 0.395     | 0.393  | 0.348     | 0.203     | -0.413    | -0.346 NA |           | -0.333 |
| A009737_01 | NA |           | 0.311  | -0.273    | -0.06 NA  |           | -0.103    | -0.044 NA |        |
| A009738_01 |    | 0.199 NA  |        | 0.195     | -0.01     | 0.292     | 0.459 NA  |           | 0.398  |
| A009740_01 |    | 0.115     | 0.02   | -0.44     | -0.448    | 0.032     | 0.131     | 0.182     | 0.024  |
| A009744_01 |    | -0.02     | -0.007 | 0.269     | 0.287     | -0.588    | -0.713    | -0.253    | -0.332 |
| A009746_01 |    | -0.014    | -0.238 | -0.113    | -0.021    | 0.18      | 0.162     | 0.238     | -0.03  |
| A009751_01 |    | 0.22      | -0.037 | 0.246     | 0.159     | -0.471    | -0.397    | -0.301    | -0.21  |
| A009752_01 |    | 0.087 NA  |        | 0.827     | 1.01      | 0.337     | 0.634     | -0.01     | 0.007  |
| A009753_01 | NA | NA        |        | -0.573    | -0.342 NA | NA        | NA        |           | -0.147 |
| A009755_01 | NA | NA        |        | 0.166     | 0.294 NA  |           | -0.141 NA | NA        |        |
| A009761_01 | NA |           | -0.046 | -0.052    | -0.127    | -0.119    | -0.257    | -0.085    | 0.08   |
| A009762_01 |    | 0.003 NA  |        | -0.023    | 0.075     | 0.096     | 0.208 NA  |           | 0.121  |
| A009764_01 |    | -0.334    | -0.145 | -0.297    | -0.15     | -0.258    | -0.039    | -0.08     | 0.156  |
| A009765_01 |    | 0.229     | -0.02  | 0.112     | 0.177     | 0.343     | 0.323     | 0.084     | -0.221 |
| A009766_01 |    | 0.186     | 0.231  | -0.446    | -0.299 NA |           | -0.388 NA | NA        |        |
| A009769_01 |    | 0.162     | 0.045  | -0.123    | 0.028     | -0.292    | -0.168    | -0.38     | -0.256 |
| A009770_01 |    | -0.287 NA |        | 0.423     | 0.409 NA  | NA        | NA        | NA        |        |
| A009776_01 |    | 0.027     | 0.134  | -0.375    | -0.423    | 0.618     | 0.969     | 0.199     | 0.45   |
| A009777_01 |    | 0.358     | 0.32   | 0.093     | 0.151     | 0.12      | 0.226     | -0.082    | -0.019 |
| A009780_01 |    | 0.342     | 0.508  | -0.065    | 0.026     | 0         | -0.005    | 0.355     | 0.49   |
| A009784_01 |    | 0.371     | 0.498  | 0.008     | 0.014 NA  |           | -0.557 NA | NA        |        |
| A009787_01 |    | 0.303 NA  |        | -0.072    | 0.018     | 0.456     | 0.513 NA  |           | 0.246  |
| A009790_01 |    | 0.228     | -0.017 | -0.223    | -0.296    | 0.285     | 0.376     | -0.009    | 0.061  |
| A009792_01 |    | -0.424    | -0.333 | -0.065    | -0.211    | 0         | 0.107     | 0.119     | 0.287  |
| A009796_01 |    | 0.132     | 0.177  | -0.204    | -0.29     | 0.206     | 0.164     | 0.156     | 0.29   |
| A009797_01 |    | -0.257 NA |        | 0.389     | 0.099     | -0.365 NA |           | 0.161     | 0.123  |
| A009803_01 |    | -0.092    | -0.085 | 0.131     | 0.132     | 0.525     | 0.548     | 0.51      | 0.51   |
| A009805_01 |    | 0.403     | 0.162  | -0.413    | -0.265    | 0.381     | 0.257     | 0.146     | -0.087 |
| A009809_01 |    | -0.052    | 0.059  | -0.215    | 0.144     | -0.257    | -0.007    | 0.019     | -0.067 |
| A009811_01 |    | -0.697    | -0.399 | -0.735    | -0.618    | 0.036     | 0.221     | 0.275     | 0.463  |
| A009821_01 |    | 0.238 NA  |        | 0.295     | 0.219     | 0.217     | 0.156     | -0.038    | -0.161 |
| A009822_01 |    | -0.191    | -0.158 | -0.685    | -0.553    | -0.215    | -0.309    | -0.097    | -0.135 |
| A009826_01 |    | 0.325 NA  |        | -0.14     | 0.149 NA  |           | -0.154 NA | NA        |        |
| A009834_01 |    | -0.143    | -0.114 | -0.251    | 0         | -0.656    | -0.732    | -0.2      | -0.251 |
| A009836_01 |    | -0.15     | -0.2   | -0.624    | -0.501    | -0.079    | 0.185     | 0.373     | 0.414  |
| A009843_01 |    | 0.068     | -0.005 | 0.061     | 0.208     | 0.196     | 0.384     | 0.15      | 0.34   |
| A009845_01 |    | 0.153     | 0.282  | -0.054    | -0.238    | 0.359     | 0.569 NA  |           | 0.315  |
| A009846_01 |    | 0.034     | 0.041  | -0.014    | -0.014    | 0.129     | 0.105     | -0.239    | -0.329 |
| A009848_01 |    | 0.423     | 0.274  | 0.231     | 0.07      | 0.189     | 0.136     | -0.071    | -0.062 |
| A009849_01 |    | 0.167     | 0.284  | -0.02     | -0.075    | 0.057     | 0.153     | 0.052     | 0.207  |
| A009855_01 |    | 0.179 NA  |        | -0.318 NA |           | -0.119    | -0.159 NA | NA        |        |
| A009864_01 | NA | NA        |        | 0.09      | 0.013 NA  | NA        | NA        |           | 0.048  |
| A009867_01 |    | 0.694     | 0.535  | 0.293     | 0.37      | 0.286     | 0.236     | 0.13      | 0.157  |
| A009868_01 |    | 0.091     | -0.063 | -0.048    | -0.199    | -0.016    | -0.179    | -0.069    | -0.281 |
| A009870_01 |    | 0.093 NA  |        | 0.09      | -0.098 NA |           | -0.426 NA |           | -0.28  |
| A009879_01 |    | -0.178    | 0.069  | -0.29     | -0.247    | -0.688    | -0.461    | -0.495    | -0.116 |
| A009885_01 |    | 0.307     | 0.064  | 0.163     | 0.199     | 0.528     | 0.492     | -0.011    | -0.285 |
| A009890_01 |    | 0.225     | 0.154  | -0.081    | -0.029    | -0.361    | -0.624    | -0.988    | -1.039 |
| A009894_01 |    | 0.065     | 0.034  | 0.003     | 0.025     | 0.03      | -0.029    | 0.167     | 0.101  |
| A009895_01 |    | 0.075     | 0.048  | -0.054    | -0.124    | 0.118     | 0.048     | 0.091     | 0.103  |
| A009898_01 |    | 0.028     | -0.177 | -0.198    | -0.001    | -0.051    | 0.022     | 0.076     | -0.17  |
| A009900_01 |    | 0.141     | 0.293  | -1.105    | -1.28     | 0.504     | 0.655     | 0.166     | 0.213  |
| A009902_01 |    | 0.099     | 0.022  | -0.261    | -0.122    | -0.128    | -0.17     | 0.194     | 0.142  |
| A009905_01 |    | -0.432    | -0.367 | -0.279    | -0.382    | 0.243     | 0.177     | 0.394     | 0.535  |
| A009906_01 |    | -0.182    | 0.005  | -0.336    | -0.066    | 0.077     | 0.262     | -0.16     | -0.096 |
| A009911_01 |    | 0.016     | -0.197 | 0.135     | 0.356     | -0.812    | -0.988    | 0.013     | -0.009 |
| A009916_01 |    | 0.034     | 0.082  | 0.001     | -0.042    | -0.041    | -0.071    | 0.063     | 0.12   |
| A009920_01 |    | 0.114     | 0.103  | 0.01      | -0.093    | 0.046     | 0.014     | -0.082    | 0.005  |
| A009926_01 |    | 0.251     | 0.386  | -0.046    | 0.295 NA  |           | -0.014 NA | NA        |        |
| A009927_01 |    | -0.005    | -0.33  | -0.032    | 0.102     | -0.482    | -0.443    | 0.178     | 0.134  |
| A009934_01 |    | -0.733 NA |        | -0.841 NA | NA        |           | -1.68 NA  |           | 0.546  |
| A009939_01 |    | -0.181    | -0.181 | -0.174 NA |           | 0.072     | 0.071     | 0.23      | 0.36   |
| A009941_01 |    | 0.222     | 0.26   | -0.139    | -0.234    | 0.22      | 0.243 NA  |           | 0.262  |

|            |           |           |           |           |        |           |          |        |
|------------|-----------|-----------|-----------|-----------|--------|-----------|----------|--------|
| A009948_01 | -0.295    | -0.223    | -0.19     | 0.053     | -0.451 | -0.489    | 0.129    | -0.055 |
| A009949_01 | -0.59     | -0.492    | 0.21      | 0.168     | -0.148 | 0.161     | -0.076   | 0.209  |
| A009956_01 | 0.266     | 0.327     | -0.02     | 0.135     | 0.012  | -0.089    | -0.186   | -0.203 |
| A009958_01 | -0.19     | 0.115     | 0.165     | -0.092    | 0.064  | 0.19      | 0.169    | 0.723  |
| A009960_01 | 0.327 NA  | NA        |           | -0.05     | 0.115  | 0.027 NA  |          | 0.058  |
| A009964_01 | 0.08      | -0.048    | -0.094    | -0.052    | 0.012  | -0.059    | 0.077    | -0.022 |
| A009965_01 | -0.085    | -0.048    | -0.007    | -0.065    | 0.045  | -0.217    | 0.287    | 0.224  |
| A009968_01 | 0.099     | -0.089    | -0.254    | -0.171    | 0.164  | 0.117     | 0.261    | 0.191  |
| A009979_01 | 0.065     | 0.056     | -0.027    | 0.005     | 0.287  | 0.317     | 0.259    | 0.291  |
| A009988_01 | 0.165     | 0.183     | -0.072    | -0.105    | 0.209  | 0.277 NA  | NA       |        |
| A009989_01 | 0.071     | 0.038     | -0.163    | -0.289    | 0.507  | 0.555 NA  |          | 0.045  |
| A009990_01 | -0.379    | -0.263    | -0.249    | 0.138     | -0.84  | -0.693    | -0.144   | 0.05   |
| A009991_01 | -0.148 NA |           | -0.255    | -0.149 NA |        | -0.229 NA | NA       |        |
| A009994_01 | 0.134     | 0.021     | -0.001    | 0.219     | 0.062  | 0.018     | 0.195    | -0.054 |
| A009997_01 | 0.003     | 0.25      | 0.168     | 0.121     | 0.104  | 0.126     | -0.161   | -0.195 |
| A010000_01 | -0.093    | 0.131     | -0.263    | -0.244    | -0.136 | 0.024     | -0.123   | 0.146  |
| A010007_01 | 0.151 NA  |           | -0.372    | -0.198 NA |        | 0.229     | 0.329    | 0.205  |
| A010011_01 | 0.058     | -0.053    | -0.128    | 0.019     | 0.023  | 0.102     | -0.238   | -0.192 |
| A010018_01 | -0.072 NA |           | -0.138    | 0.087 NA  |        | -0.014    | 0.033    | 0.027  |
| A010021_01 | -0.24     | -0.03     | 0.041     | 0.153     | -0.058 | -0.034    | 0.031    | -0.01  |
| A010023_01 | -0.043    | -0.151 NA | NA        |           | -0.15  | -0.09 NA  | NA       |        |
| A010025_01 | 0.373     | 0.068     | 0.103     | 0.103 NA  |        | -0.342    | 0.135    | 0.051  |
| A010027_01 | 0.079     | 0.01      | -0.255    | -0.318    | 0.278  | 0.201 NA  | NA       |        |
| A010028_01 | 0.062     | 0.072     | -0.136    | -0.104    | 0      | -0.052    | 0.225    | 0.157  |
| A010033_01 | 0.047     | 0.051     | -0.015    | 0.161     | -0.362 | -0.481    | -0.2     | -0.183 |
| A010040_01 | 0.224     | -0.037    | -0.099    | 0.103     | -0.394 | -0.37     | 0.216    | 0.244  |
| A010042_01 | -0.058 NA |           | -0.434    | -0.165    | 0.022  | -0.217    | 0.261    | 0.18   |
| A010044_01 | -0.089    | -0.151    | 0.078     | 0.133     | 0.008  | 0.013     | 0.101    | -0.023 |
| A010047_01 | 0.401     | 0.175     | 0.053     | 0.031     | 0.139  | -0.094 NA |          | 0.123  |
| A010048_01 | -0.805 NA |           | -0.582 NA |           | -0.386 | -0.491 NA | NA       |        |
| A010049_01 | 0.001     | -0.137    | -0.294    | -0.357    | -0.076 | -0.183    | 0.209    | 0.049  |
| A010051_01 | -0.558    | -0.464    | -0.346    | -0.3      | -0.502 | -0.373 NA |          | -0.196 |
| A010059_01 | 0.012     | 0.065     | -0.093    | -0.083    | 0.085  | 0.105 NA  |          | -0.036 |
| A010061_01 | 0.03      | -0.02     | 0.054     | 0.041     | -0.28  | -0.253    | 0.211    | 0.216  |
| A010065_01 | -0.333 NA |           | -0.276    | -0.415 NA |        | -0.943 NA |          | -0.269 |
| A010066_01 | NA        | 0.259     | 0.404     | 0.346     | 0.563  | 0.622     | -0.223   | -0.026 |
| A010068_01 | -0.081    | 0.111     | -0.228    | -0.344    | 0.036  | 0.184     | 0.167 NA |        |
| A010172_01 | -0.311    | -0.34     | -0.162    | -0.169    | 0.029  | -0.017    | 0.092    | 0.134  |
| A010173_01 | 0.321     | 0.266     | 0.119     | 0.055     | 0.432  | 0.496     | 0.273    | 0.322  |
| A010174_01 | -0.287    | -0.433    | 0.101     | 0.034     | -0.146 | -0.3      | 0.056    | -0.13  |
| A010190_01 | 0.482 NA  |           | 0.373     | 0.267     | 0.725  | 0.693 NA  |          | 0.109  |
| A010219_01 | 0.473 NA  |           | 0.163     | 0.052 NA  |        | -0.32     | -0.062   | -0.139 |
| A010227_01 | 0.169     | 0.253     | -0.292    | -0.079    | -0.027 | 0.075     | -0.009   | 0.13   |
| A010255_01 | 0.297     | 0.029     | -0.018    | 0.03      | 0.274  | -0.101    | 0.081    | -0.095 |
| A010261_01 | 0.099     | 0.153     | 0.054     | -0.109    | 0.097  | 0.068     | -0.081   | 0.145  |
| A010262_01 | -0.11     | 0.151     | -0.304    | -0.042    | -0.17  | -0.072    | 0.119    | 0.311  |
| A010265_01 | 0.053     | -0.022    | 0.313     | 0.067     | 0.14   | -0.093    | 0.152    | -0.009 |
| A010270_01 | 0.082     | 0.163     | -0.174 NA |           | 0.035  | 0.238 NA  | NA       |        |
| A010272_01 | -0.356    | -0.306    | -0.259    | -0.217    | 0.34   | 0.399     | -0.035   | 0.036  |
| A010274_01 | 0.179 NA  |           | 0.129     | 0.318     | -0.175 | -0.26 NA  |          | -0.027 |
| A010275_01 | 0.148     | -0.018    | -0.019    | 0.12      | 0.035  | 0.17      | 0.023    | -0.152 |
| A010276_01 | -0.092    | -0.265    | 0.244     | 0.155     | 0.627  | 0.694     | -0.311   | -0.393 |
| A010282_01 | 0.218 NA  |           | -0.097    | -0.102 NA |        | 0.312     | -0.019   | 0.014  |
| A010294_01 | 0.287     | 0.171     | -0.037    | -0.027    | 0.103  | 0.067     | 0.025    | 0.133  |
| A010296_01 | -0.371 NA |           | -0.106    | 0.165     | -0.408 | -0.406 NA |          | -0.182 |
| A010300_01 | -0.603 NA |           | 0.213     | 0.27      | -0.522 | -0.254 NA | NA       |        |
| A010306_01 | -0.123 NA |           | -0.313 NA |           | 0.568  | 0.725 NA  | NA       |        |
| A010307_01 | 0.308     | 0.562     | -0.174    | -0.235    | 0.294  | 0.343     | 0.201    | 0.337  |
| A010308_01 | -0.041 NA |           | 0.235     | 0.039 NA  | NA     |           | -0.035   | 0.025  |
| A010310_01 | 0.123     | 0.026     | -0.045    | 0.016     | 0.101  | 0.149     | 0.118    | 0.23   |
| A010313_01 | -0.132    | -0.134    | -0.324    | -0.276    | 0.041  | 0.15 NA   | NA       |        |
| A010315_01 | -0.049    | -0.201    | -0.211    | -0.079    | -0.233 | -0.114    | 0.122    | -0.13  |
| A010316_01 | 0.063     | 0.069     | -0.283    | -0.188    | -0.322 | -0.345    | 0.105    | 0.169  |
| A010318_01 | -0.077    | 0.025     | -0.598    | -0.252    | -0.146 | 0.085     | 0.026    | 0.119  |
| A010320_01 | -0.361    | -0.289    | -0.219    | 0.085     | -1.031 | -0.984    | -0.281   | -0.329 |
| A010323_01 | 0.199     | 0.264     | -0.044    | -0.013    | 0.748  | 0.843     | 0.519    | 0.477  |
| A010327_01 | -0.335    | -0.149    | -0.525    | -0.286    | -0.179 | -0.031    | 0.202    | 0.133  |
| A010328_01 | -0.173 NA |           | -0.317    | -0.291    | 0.162  | 0.548 NA  |          | 0.307  |



|            |    |           |           |           |           |        |           |        |        |
|------------|----|-----------|-----------|-----------|-----------|--------|-----------|--------|--------|
| A010329_01 |    | 0.117 NA  |           | -0.031    | -0.058    | -0.142 | -0.39 NA  |        | -0.211 |
| A010333_01 |    | -0.24     | 0.207     | 0.021     | -0.18     | 0.324  | 0.259     | 0.104  | 0.306  |
| A010343_01 |    | -0.225    | -0.195    | -1.095    | -1.167    | 0.342  | 0.514 NA  | NA     |        |
| A010344_01 |    | -0.247    | -0.255    | -0.171    | -0.018    | -0.38  | -0.226    | -0.156 | -0.119 |
| A010345_01 |    | -0.036    | -0.036    | -0.08     | -0.054    | -0.129 | -0.139    | 0.062  | -0.016 |
| A010348_01 |    | 0.36      | 0.823     | -0.031    | -0.167    | 0.395  | 0.659     | -0.064 | 0.472  |
| A010349_01 |    | 0.135     | -0.002    | -0.329    | -0.4      | 0.09   | 0.166     | 0.108  | 0.073  |
| A010354_01 |    | 0.157 NA  |           | 0.059 NA  |           | 0.191  | 0.463 NA  | NA     |        |
| A010359_01 |    | 0.358     | 0.113     | 0.067     | 0.069     | 0.204  | 0.066     | -0.018 | 0.033  |
| A010362_01 |    | 0.262 NA  |           | -0.185    | -0.118    | 0.275  | 0.194     | 0.127  | 0.264  |
| A010363_01 |    | 0.078     | 0.006     | -0.097    | -0.099    | -0.014 | 0         | -0.163 | -0.209 |
| A010365_01 |    | -0.168    | -0.265    | -0.085    | 0.095     | -0.938 | -1.052    | -0.248 | -0.442 |
| A010369_01 |    | -0.506    | -0.473    | -0.129    | -0.065    | -0.712 | -0.911    | 0.036  | -0.16  |
| A010371_01 |    | 0.387 NA  |           | -0.178    | 0.119 NA  |        | -0.3 NA   | NA     |        |
| A010374_01 | NA |           | 0.087     | 0.069     | 0.03      | -0.174 | -0.294    | 0.115  | 0.042  |
| A010377_01 |    | 0.078     | -0.036    | 0.162     | -0.004    | 0.248  | 0.264     | -0.039 | -0.131 |
| A010378_01 | NA |           | -1.569    | -2.109    | -1.602 NA |        | -3.678    | -1.498 | -2.224 |
| A010379_01 |    | -0.155    | -0.01     | -0.057    | -0.285    | 0.364  | 0.348     | 0.045  | 0.255  |
| A010383_01 |    | 0.089     | 0.233     | -0.189    | -0.134    | -0.214 | 0.015     | -0.017 | 0.022  |
| A010390_01 |    | 0.013     | -0.012    | 0.19      | 0.213 NA  |        | 0.027     | -0.085 | -0.316 |
| A010393_01 |    | -1.955    | -1.394    | -0.808    | -0.543    | -1.866 | -1.969    | -1.143 | -1.295 |
| A010395_01 | NA | NA        |           | 0.22      | 0.107 NA  |        | 0.199 NA  |        | 0.107  |
| A010400_01 |    | -0.035    | -0.151    | -0.186    | 0.097     | -0.204 | 0.211     | 0.114  | -0.066 |
| A010404_01 |    | -0.116    | -0.231    | -0.208 NA |           | -0.26  | -0.221 NA |        | 0.091  |
| A010411_01 |    | -0.295 NA |           | -0.059    | -0.061    | -0.114 | 0.133     | -0.358 | -0.151 |
| A010413_01 |    | 0.105     | 0.208     | 0.301     | 0.122     | -0.169 | -0.232 NA | NA     |        |
| A010414_01 |    | -0.051    | 0.359     | -0.109    | -0.236    | 0.184  | 0.64      | -0.123 | 0.202  |
| A010417_01 |    | 0.418     | 0.383     | 0.377     | 0.418     | 0.244  | 0.163     | -0.136 | -0.138 |
| A010420_01 |    | -0.309    | -0.31     | -0.264    | -0.167    | -0.427 | -0.26     | -0.021 | -0.035 |
| A010425_01 |    | 0.217     | 0.193     | -0.245    | -0.121    | 0.054  | 0.045     | 0.112  | -0.025 |
| A010433_01 |    | 0.31      | 0.266     | 0.214     | 0.032     | 0.064  | 0.063 NA  |        | -0.028 |
| A010434_01 |    | 0.23      | 0.162     | -0.029    | 0.004     | 0.056  | 0.046     | -0.156 | -0.013 |
| A010441_01 |    | 0.001 NA  | NA        | NA        |           | -0.369 | -0.394 NA | NA     |        |
| A010443_01 |    | -0.117    | -0.015    | 0.657     | 0.478     | -0.116 | -0.112    | -0.137 | -0.132 |
| A010449_01 |    | -0.115    | -0.238    | -0.072    | -0.126    | -0.056 | -0.101    | 0.369  | 0.387  |
| A010451_01 |    | 0.456     | 0.363     | -0.049    | 0.062     | -0.036 | -0.069    | 0.288  | 0.249  |
| A010452_01 |    | 0.355     | 0.279     | -0.057    | -0.018    | -0.009 | -0.135    | 0.184  | 0.174  |
| A010456_01 |    | 0.075     | -0.039    | 0.056     | 0         | 0.155  | 0.012     | -0.032 | 0.057  |
| A010457_01 |    | -0.055 NA |           | 0.132     | -0.067 NA |        | 0.077 NA  |        | -0.024 |
| A010458_01 |    | -0.03     | -0.019    | -0.25     | -0.188    | 0.074  | 0.115     | 0      | 0.026  |
| A010459_01 |    | 0.017 NA  |           | -0.153    | -0.158 NA |        | -0.03     | 0.136  | 0.04   |
| A010460_01 |    | -0.257    | -0.235    | 0.026     | -0.124    | -0.359 | -0.321    | -0.23  | 0.025  |
| A010461_01 | NA |           | -0.306 NA |           | -0.316    | -0.165 | -0.338 NA | NA     |        |
| A010463_01 |    | -0.325    | -0.406    | -0.319    | -0.221    | -0.014 | 0.148     | -0.381 | -0.129 |
| A010464_01 |    | 0.038     | 0.043     | -0.092    | -0.064    | -0.133 | -0.175    | 0.12   | -0.049 |
| A010466_01 |    | 0.098     | 0.084     | 0.148     | 0.345 NA  |        | -0.153 NA | NA     |        |
| A010467_01 | NA |           | -0.16     | 0.03      | 0.064 NA  |        | -0.414    | -0.267 | -0.346 |
| A010469_01 |    | -0.165    | -0.18     | -0.128    | 0.025     | -0.195 | -0.207 NA |        | -0.104 |
| A010473_01 | NA |           | 0.159     | -0.018    | -0.15 NA  |        | 0.07 NA   |        | 0.131  |
| A010480_01 |    | 0.294 NA  |           | 0.207     | 0.335 NA  |        | -0.397 NA |        | -0.013 |
| A010481_01 |    | 0.074     | -0.159 NA |           | -0.384    | 0.771  | 0.862 NA  |        | 0.364  |
| A010495_01 |    | 0.259     | 0.252     | -0.249    | -0.016    | 0.023  | 0.139     | -0.145 | -0.077 |
| A010498_01 |    | 0.162 NA  |           | -0.012    | 0.138     | -0.148 | -0.215 NA |        | -0.077 |
| A010502_01 |    | 0.504     | 0.411     | 0.055     | 0.132     | 0.017  | -0.1      | 0.039  | -0.109 |
| A010504_01 |    | 0.227 NA  |           | -0.188    | -0.185    | 0.152  | 0.062 NA  |        | -0.088 |
| A010506_01 |    | -0.843    | -0.827    | 0.119     | 0.125     | -0.729 | -0.594    | -0.608 | -0.219 |
| A010508_01 |    | 0.253     | -0.02     | -0.027    | -0.122    | 0.322  | 0.296     | 0.223  | 0.15   |
| A010516_01 |    | -0.153    | -0.135    | -0.189    | -0.253    | -0.025 | 0.032     | -0.043 | -0.178 |
| A010517_01 |    | -0.57     | -0.991    | -0.467    | -0.31     | -0.997 | -0.829    | -0.868 | -0.477 |
| A010518_01 |    | -0.94     | -1.044    | -0.59     | -0.387    | -1.423 | -1.186    | -0.566 | -0.44  |
| A010522_01 |    | 0.222 NA  |           | 0.322 NA  |           | -0.373 | -0.81 NA  | NA     |        |
| A010526_01 |    | -0.24     | -0.428    | -0.145    | -0.172    | -0.025 | -0.113 NA | NA     |        |
| A010527_01 |    | 0.132     | -0.055    | 0.235     | 0.177     | 0.847  | 1.05      | 0.483  | 0.405  |
| A010534_01 |    | 0.252     | 0.043     | -0.003    | -0.147    | -0.003 | 0.047     | 0.154  | 0.067  |
| A010535_01 |    | 0.023     | 0.4       | 0.106     | -0.046    | 0.386  | 0.355     | 0.306  | 0.499  |
| A010538_01 |    | -0.055    | -0.01     | -0.052 NA |           | 0.046  | 0.259 NA  | NA     |        |
| A010541_01 |    | -0.674    | -0.433    | -0.193    | -0.062    | 0.35   | 0.68      | -0.033 | 0.029  |
| A010544_01 |    | 0.074     | -0.056    | 0.091     | 0.182     | -0.18  | -0.251    | -0.064 | -0.206 |

|            |           |           |           |           |        |           |           |        |
|------------|-----------|-----------|-----------|-----------|--------|-----------|-----------|--------|
| A010548_01 | -0.254    | -0.361    | 0.054     | -0.054    | -0.418 | -0.722    | -0.026    | -0.277 |
| A010549_01 | -0.137 NA |           | 0.146     | 0.009 NA  |        | -0.53 NA  |           | -0.016 |
| A010555_01 | 0.045     | 0.126     | -0.346    | -0.297    | 0.199  | 0.479     | 0.279     | 0.401  |
| A010557_01 | -0.194    | -0.241    | 0.005     | 0.105     | 0.092  | 0.02      | -0.073    | -0.149 |
| A010559_01 | -0.184    | -0.086    | -0.102    | -0.017    | -0.607 | -0.578    | -0.353    | -0.207 |
| A010563_01 | 0.179 NA  |           | -0.164 NA |           | 0.194  | 0.079 NA  |           | -0.053 |
| A010564_01 | 0.041     | -0.087    | 0.064     | 0.253     | 0.02   | -0.028    | 0.188     | -0.073 |
| A010568_01 | 0.27      | 0.449     | 0.142     | 0.047     | 0.182  | 0.29      | 0.127     | 0.303  |
| A010571_01 | 0.009 NA  |           | -0.13     | 0.117     | -0.484 | -0.547 NA |           | -0.113 |
| A010573_01 | -0.021    | -0.083    | -0.088    | 0.033     | 0.069  | -0.084    | 0.216     | 0.072  |
| A010578_01 | 0.073     | -0.015    | -0.201    | -0.227    | 0.018  | -0.069    | -0.005    | -0.142 |
| A010579_01 | 0.434     | 0.347     | -0.063    | 0.081     | 0.191  | 0.267     | -0.21     | -0.18  |
| A010582_01 | -0.073    | -0.122    | -0.047    | 0.151     | 0.324  | 0.45 NA   |           | -0.848 |
| A010591_01 | 0.268 NA  |           | 0.135     | -0.056 NA | NA     |           | -0.071    | -0.095 |
| A010592_01 | 0.075 NA  |           | 0.364     | 0.205 NA  |        | 0.167     | 0.14      | -0.149 |
| A010593_01 | -0.347    | -0.306    | 0.031     | -0.176    | -0.334 | -0.163    | -0.148    | 0.027  |
| A010595_01 | -0.073    | -0.338    | -0.181    | -0.157    | -0.154 | -0.154    | 0.026     | 0.003  |
| A010599_01 | -0.495    | -0.248    | -0.014    | 0.105     | -1.138 | -1.346    | -0.352    | -0.356 |
| A010601_01 | -0.367 NA |           | 0.033     | 0.078     | 0.376  | 0.272 NA  | NA        |        |
| A010602_01 | -0.119 NA |           | 0.064     | -0.06     | -0.069 | -0.156 NA |           | -0.136 |
| A010603_01 | 0.223 NA  |           | -0.162    | -0.136 NA |        | 0.121 NA  |           | 0.064  |
| A010604_01 | 0.166     | -0.018    | 0.076     | -0.012 NA |        | -0.158 NA | NA        |        |
| A010605_01 | 0.101 NA  |           | -0.151    | -0.165    | -0.233 | -0.277 NA |           | -0.139 |
| A010606_01 | 0.226     | 0.237     | -0.582    | -0.236    | 0.033  | 0.16      | -0.259    | -0.247 |
| A010607_01 | 0.056     | 0.257     | 0.135     | 0.15      | 0.208  | 0.043     | 0.009     | 0.073  |
| A010608_01 | 0.045     | 0.079     | 0.209     | 0.153     | -0.175 | -0.21 NA  |           | -0.261 |
| A010611_01 | 0.148 NA  |           | 0.143 NA  |           | -0.355 | -0.3 NA   |           | 0.062  |
| A010612_01 | -0.217 NA |           | 0.013 NA  |           | -0.279 | -0.148 NA |           | 0.008  |
| A010615_01 | -0.181    | -0.246    | -0.163    | 0         | -0.323 | -0.189    | -0.003    | -0.124 |
| A010616_01 | 0.038     | -0.184    | 0.037     | 0.082     | -0.43  | -0.821    | 0.19      | -0.125 |
| A010617_01 | 0.188     | -0.001    | 0.04      | -0.076    | 0.452  | 0.445     | 0.288     | 0.249  |
| A010619_01 | 0.59      | 0.698     | -0.505    | -0.148    | 0.437  | 0.725     | -0.169    | -0.06  |
| A010624_01 | 0.219     | 0.069     | 0.002     | 0.016     | 0.248  | 0.207     | 0.11      | 0.061  |
| A010625_01 | 0.144     | 0.015     | -0.03     | -0.168    | 0.131  | 0.167     | 0.045     | 0.143  |
| A010626_01 | -0.303    | -0.366    | -0.127    | -0.053    | -0.488 | -0.568    | -0.043    | -0.09  |
| A010628_01 | 0.024     | -0.003    | -0.093    | -0.199    | -0.335 | -0.43     | -0.009    | 0.006  |
| A010629_01 | -0.008    | -0.316    | 0.149     | 0.078     | -0.693 | -0.99     | -0.208    | -0.296 |
| A010632_01 | 0.107     | 0.007     | -0.553 NA |           | 0.403  | 0.68 NA   | NA        |        |
| A010633_01 | 0.117 NA  | NA        |           | 0.06 NA   |        | -0.247 NA | NA        |        |
| A010634_01 | -0.013    | 0.06      | -0.155    | 0.004     | -0.673 | -0.612    | 0.002     | -0.067 |
| A010636_01 | 0.131     | -0.091    | -0.254    | -0.13     | -0.141 | -0.089    | 0.101     | 0.112  |
| A010637_01 | 0.261 NA  |           | -0.229    | 0.008     | -0.107 | -0.234 NA |           | -0.09  |
| A010638_01 | 0.012     | 0.019     | 0         | 0.024     | 0.004  | 0.049     | -0.184    | -0.265 |
| A010643_01 | 0.006     | -0.049    | -0.059    | -0.279    | -0.238 | -0.415    | -0.216    | -0.221 |
| A010645_01 | -0.138    | -0.112 NA |           | -0.028    | -0.167 | -0.211    | -0.176    | -0.06  |
| A010647_01 | 0.011     | -0.065    | -0.132    | -0.076    | -0.171 | -0.267    | 0.162     | 0.015  |
| A010648_01 | -0.607    | -0.335    | 0.085     | 0.074     | 0.262  | 0.687     | -0.455    | -0.129 |
| A010650_01 | 0.281     | 0.193     | -0.145    | -0.123    | 0.127  | 0.192     | -0.022    | -0.122 |
| A010652_01 | 0.272     | -0.163    | -0.117    | -0.182    | -0.012 | -0.149    | 0.231     | 0.172  |
| A010656_01 | -0.423    | -0.658    | -0.016    | -0.068    | -0.399 | -0.235    | -0.013    | 0.163  |
| A010658_01 | 0.4       | 0.294     | -0.166    | -0.055    | -0.845 | -1.06     | 0.06      | 0.177  |
| A010659_01 | -0.111    | -0.195    | 0.06      | 0.139     | 0.102  | 0.112     | 0.152     | 0.134  |
| A010660_01 | -0.415    | -0.58     | -0.661    | -0.701    | -0.796 | -0.949    | -0.666    | -0.63  |
| A010663_01 | -0.046    | -0.042    | -0.023    | -0.052    | -0.037 | -0.006    | 0.188     | 0.203  |
| A010666_01 | -0.434    | -0.104    | -0.553    | -0.597    | -0.438 | -0.351    | -0.655    | -0.416 |
| A010669_01 | -0.183    | 0.046     | -0.287    | -0.317    | 0.827  | 1.111     | 0.265     | 0.282  |
| A010676_01 | 0.445     | 0.639     | 0.676     | 0.468     | -0.174 | -0.456    | -0.352    | -0.102 |
| A010677_01 | 0.371     | 0.335     | -0.242    | -0.306    | 0.344  | 0.518     | 0         | 0.14   |
| A010678_01 | 0.26 NA   |           | 0.149     | 0.092     | 0.079  | -0.121 NA |           | -0.129 |
| A010679_01 | -0.226 NA |           | 0.056     | -0.004    | -0.668 | -0.958    | 0.123     | -0.118 |
| A010681_01 | 0.029     | -0.253    | 0.167     | -0.01     | 0.399  | 0.566     | 0.193     | 0.134  |
| A010689_01 | -0.405 NA |           | 0.743 NA  |           | 0.095  | -0.02 NA  | NA        |        |
| A010690_01 | 0.07      | 0.209     | 0.033     | 0.026     | 0.246  | 0.407     | -0.076    | 0.217  |
| A010693_01 | -0.045    | -0.07     | -0.037    | 0.011     | 0.183  | 0.197     | 0.173     | -0.083 |
| A010696_01 | -0.316    | -0.337    | -0.268    | -0.372    | 0.167  | 0.099     | 0.137     | 0.019  |
| A010698_01 | 0         | -0.125    | -0.003    | 0.069     | -0.084 | -0.13     | -0.145 NA |        |
| A010699_01 | -0.317    | -0.164    | -0.088    | -0.029    | -0.179 | -0.006    | -0.164    | 0.15   |
| A010701_01 | 0.051     | 0.289     | -0.155    | -0.325    | 0.266  | 0.645 NA  |           | 0.416  |

|            |           |          |        |           |        |           |           |        |
|------------|-----------|----------|--------|-----------|--------|-----------|-----------|--------|
| A010704_01 | 0.217     | 0.207    | -0.258 | -0.234    | 0.214  | 0.187     | 0.079     | -0.018 |
| A010706_01 | 0.055 NA  |          | 0.007  | -0.022 NA | NA     | NA        |           | -0.004 |
| A010708_01 | -0.514 NA |          | 0.227  | 0.18      | -0.927 | -1.118 NA |           | -0.279 |
| A010709_01 | -0.056    | -0.228   | 0.187  | 0.034     | -0.291 | -0.362 NA |           | -0.239 |
| A010710_01 | 0.234     | -0.073   | 0.03   | -0.041    | -0.041 | -0.218    | 0.322     | -0.142 |
| A010713_01 | -0.088 NA |          | -0.274 | -0.019    | 0.076  | -0.161 NA | NA        |        |
| A010715_01 | -0.212    | -0.233   | -0.011 | 0.119     | 0.109  | 0.295     | 0.273     | 0.176  |
| A010720_01 | -0.05     | -0.169   | 0.061  | -0.086    | 0.106  | 0.152 NA  | NA        |        |
| A010724_01 | 0.257     | 0.259    | 0.069  | 0.007     | 0.599  | 0.536     | -0.071    | 0.094  |
| A010725_01 | 0.073     | -0.048   | -0.167 | -0.173    | 0.032  | 0.015     | 0.157     | 0.092  |
| A010727_01 | 0.202     | -0.062   | -0.343 | -0.078    | -0.307 | -0.288    | 0.104     | -0.236 |
| A010729_01 | -0.04     | -0.177   | 0.008  | -0.07     | -0.028 | -0.029    | 0.074     | 0.054  |
| A010731_01 | -0.527 NA |          | 0.114  | 0.502 NA  |        | -1.48     | -0.822    | -0.938 |
| A010732_01 | 0.302     | 0.154    | 0.133  | 0.109     | 0.058  | -0.11     | -0.072    | -0.032 |
| A010733_01 | 0.002     | -0.04    | -0.373 | -0.259    | -1.012 | -1.079    | -0.387    | -0.419 |
| A010734_01 | 0.527     | 0.444    | -0.266 | -0.175    | 0.069  | 0.06      | 0.017     | -0.013 |
| A010737_01 | -0.031    | 0.014    | -0.244 | 0.12      | -0.046 | 0.206     | -0.038    | -0.035 |
| A010739_01 | -0.776    | -0.805   | 0.378  | 0.649     | -1.931 | -2.119    | -0.201    | -0.235 |
| A010744_01 | -0.262 NA | NA       |        | 0.318 NA  |        | -0.192 NA | NA        |        |
| A010745_01 | 0.071     | 0.179    | 0.121  | 0.142     | 0.295  | 0.271 NA  | NA        |        |
| A010749_01 | -0.259    | -0.197   | 0.122  | 0.061     | -0.121 | -0.151    | -0.141    | -0.153 |
| A010750_01 | -0.378    | -0.334   | 0.052  | 0.074     | -0.349 | -0.421    | -0.751    | -0.497 |
| A010751_01 | -0.091 NA |          | 0.104  | 0.204 NA  |        | -0.047    | -0.033    | -0.072 |
| A010756_01 | 0.027 NA  |          | -0.062 | -0.019 NA |        | -0.166    | -0.147 NA |        |
| A010758_01 | -0.546    | -0.331   | 0.197  | 0.033     | -0.322 | -0.414    | 0.022     | 0.011  |
| A010759_01 | 0.04 NA   | NA       |        | 0.088     | 0.185  | 0.277 NA  | NA        |        |
| A010772_01 | -0.099    | 0.182 NA |        | -0.123    | -0.154 | -0.171 NA |           | 0.174  |
| A010775_01 | 0.03 NA   |          | 0.055  | 0.021     | 0.096  | 0.059 NA  | NA        |        |
| A010776_01 | 0.078     | 0.029    | -0.034 | -0.067    | -0.236 | -0.287    | 0.062     | 0.108  |
| A010781_01 | -0.399    | -0.403   | -0.289 | -0.3      | -0.005 | 0.073     | -0.116    | -0.055 |
| A010790_01 | 0.354     | 0.472    | 0.244  | 0.174     | 0.86   | 0.78      | 0.606     | 0.699  |
| A010803_01 | 0.105 NA  |          | -0.125 | -0.043 NA |        | -0.208 NA |           | 0.186  |
| A010804_01 | 0.262     | 0.409    | 0.28   | 0.522     | 0.32   | 0.424     | -0.427    | -0.254 |
| A010805_01 | 0.248     | 0.294    | -0.34  | -0.203    | 0.071  | 0.2       | -0.304    | -0.307 |
| A010815_01 | -0.11     | -0.064   | -0.217 | -0.212    | -0.132 | -0.136    | 0.276     | 0.233  |
| A010819_01 | -0.096 NA |          | 0.179  | 0.229     | -0.033 | 0.123 NA  |           | 0.026  |
| A010822_01 | 0.296     | -0.029   | -0.023 | 0.009     | 0.223  | 0.182 NA  |           | 0.035  |
| A010834_01 | -0.148    | -0.007   | 0.021  | -0.057    | -0.202 | -0.078    | -0.1      | -0.034 |
| A010837_01 | -0.305    | -0.149   | -0.002 | -0.029    | -0.432 | -0.561    | 0.225     | 0.343  |
| A010846_01 | 0.224     | 0.212    | -0.016 | 0.012     | 0.07   | 0.096     | -0.238    | -0.229 |
| A010851_01 | 0.234     | 0.039    | 0.145  | 0.455     | 0.201  | 0.421     | -0.13     | -0.05  |
| A010863_01 | -0.409    | -0.055   | -0.822 | -0.594    | -0.434 | -0.588    | -0.343    | -0.209 |
| A010869_01 | -0.138    | -0.249   | -0.201 | -0.126    | -0.202 | -0.091    | 0.088     | 0.293  |
| A010874_01 | 0.531     | 0.57     | 0.023  | 0.021     | 0.705  | 0.599     | 0.17      | 0.236  |
| A010875_01 | 0.246 NA  |          | 0.077  | -0.033 NA |        | -0.614    | -0.026    | -0.099 |
| A010876_01 | 0.164     | 0.094    | -0.052 | -0.05     | 0.174  | 0.203 NA  | NA        |        |
| A010877_01 | NA        | NA       | -0.106 | -0.269    | 0.418  | 0.225 NA  | NA        |        |
| A010879_01 | 0 NA      |          | 0.207  | 0.148     | -0.64  | -0.748 NA | NA        |        |
| A010881_01 | 0.217     | 0.193    | -0.235 | -0.177    | -0.251 | -0.213    | -0.067    | 0.031  |
| A010885_01 | 0.012 NA  |          | 0.126  | 0.28      | 0.024  | 0.038     | 0.046     | 0.052  |
| A010887_01 | 0.144 NA  |          | -0.165 | -0.32     | 0.118  | 0.065 NA  | NA        |        |
| A010892_01 | -0.043    | -0.082   | -0.2   | -0.04     | -0.199 | -0.057    | -0.077    | 0.07   |
| A010893_01 | -0.09     | -0.08    | -0.257 | -0.336    | 0.022  | -0.059    | 0.094     | 0.118  |
| A010898_01 | -0.625 NA |          | 0.169  | 0.237     | 0.177  | 0.297 NA  | NA        |        |
| A010902_01 | 0.146     | 0.03     | 0.116  | 0.069     | 0.427  | 0.514     | 0.234     | -0.045 |
| A010909_01 | -0.089    | -0.07    | -0.034 | 0.057     | 0.001  | 0.194     | -0.114    | 0.007  |
| A010911_01 | 0.029     | -0.056   | -0.139 | -0.002    | -1.284 | -1.478    | 0.075     | 0.029  |
| A010912_01 | 0.404     | 0.299    | 0.091  | -0.086 NA |        | -0.245 NA | NA        |        |
| A010915_01 | -0.168 NA |          | -0.286 | -0.351    | 0.167  | 0.351     | 0.42      | 0.54   |
| A010916_01 | 0.336     | 0.106    | 0.117  | 0.209     | -0.051 | -0.069    | -0.37     | -0.481 |
| A010926_01 | -0.611 NA |          | -0.142 | 0.123     | -0.295 | -0.216 NA | NA        |        |
| A010929_01 | 0.221 NA  |          | 0.01   | 0.059     | 0.365  | 0.498 NA  | NA        |        |
| A010934_01 | 0.081     | 0.043    | -0.213 | -0.016    | -0.128 | -0.08     | 0.039     | 0.07   |
| A010935_01 | -0.11     | -0.16    | -0.379 | -0.211    | 0.235  | 0.458     | 0.045     | 0.002  |
| A010938_01 | -0.042    | 0.07     | -0.163 | -0.381    | -0.164 | -0.127    | -0.005    | 0.261  |
| A010941_01 | -0.154    | 0.146    | -0.145 | -0.27     | -0.173 | -0.15     | -0.017    | 0.318  |
| A010942_01 | 0.191     | 0.096    | -0.069 | -0.114    | 0.314  | 0.276     | 0         | -0.12  |
| A010943_01 | -0.048 NA |          | -0.029 | 0.101     | -0.768 | -0.871    | 0.089     | -0.195 |

|            |        |        |        |        |        |        |  |        |        |        |
|------------|--------|--------|--------|--------|--------|--------|--|--------|--------|--------|
| A010947_01 | NA     | NA     |        | -0.189 | -0.12  | NA     |  | 0.074  | 0.227  | 0.341  |
| A010948_01 | NA     | NA     |        | -0.209 | -0.253 | NA     |  | -0.258 | 0.197  | -0.02  |
| A010949_01 |        | -0.154 | -0.219 | -0.931 | -0.954 | 0.595  |  | 0.935  | NA     | 0.141  |
| A010951_01 |        | 0.006  | NA     | -0.208 | 0.04   | 0.012  |  | 0.104  | NA     | NA     |
| A010955_01 |        | 0.393  | 0.701  | 0.163  | 0.233  | -0.316 |  | -0.427 | -0.776 | -0.584 |
| A010958_01 |        | -0.861 | -0.932 | -1.655 | -1.208 | 0.134  |  | 0.676  | -0.422 | -0.456 |
| A010960_01 |        | 0.039  | -0.148 | 0.121  | 0.117  | 0.117  |  | -0.087 | 0.054  | 0.194  |
| A010961_01 |        | -0.201 | -0.042 | -0.078 | -0.262 | 0.458  |  | 0.786  | -0.237 | -0.049 |
| A010963_01 |        | 0.172  | 0.202  | -0.05  | -0.036 | 0.158  |  | 0.268  | 0.067  | 0.091  |
| A010964_01 |        | 0.363  | 0.098  | 0.138  | 0.049  | 0.387  |  | 0.58   | -0.374 | -0.439 |
| A010973_01 | -0.197 | NA     | NA     | NA     |        | -0.313 |  | -0.366 | NA     | NA     |
| A010976_01 |        | 0.233  | 0.091  | -0.097 | -0.022 | -0.149 |  | -0.161 | 0.127  | -0.016 |
| A010980_01 |        | 0.486  | NA     | 0.013  | 0.012  | NA     |  | 0.185  | 0.242  | 0.106  |
| A010995_01 |        | 0.169  | -0.148 | -0.249 | -0.297 | NA     |  | -0.426 | NA     | -0.079 |
| A010996_01 |        | 0.253  | -0.156 | -0.227 | -0.168 | -0.065 |  | 0.159  | 0.141  | 0.215  |
| A011002_01 |        | -0.05  | -0.041 | 0.22   | 0.234  | -0.272 |  | -0.282 | 0.117  | 0.297  |
| A011007_01 |        | 0.292  | 0.318  | 0.251  | 0.306  | 0.263  |  | 0.392  | 0.045  | 0.015  |
| A011019_01 |        | 0.232  | 0.13   | -0.117 | -0.111 | 0.282  |  | 0.255  | -0.004 | -0.023 |
| A011021_01 |        | -0.072 | 0.131  | 0.003  | 0.067  | -0.102 |  | -0.129 | -0.033 | -0.022 |
| A011029_01 |        | 0.074  | 0.209  | -0.059 | 0.005  | 0.521  |  | 0.913  | NA     | NA     |
| A011033_01 |        | 0.018  | 0.128  | -0.238 | -0.231 | 0.163  |  | 0.278  | 0.2    | 0.289  |
| A011038_01 |        | 0.032  | -0.014 | -0.006 | 0.001  | 0.16   |  | 0.241  | 0.159  | -0.139 |
| A011039_01 |        | -0.225 | -0.064 | -0.031 | -0.08  | 0.078  |  | 0.202  | -0.16  | 0.013  |
| A011040_01 |        | 0.253  | NA     | 0.365  | 0.075  | 0.387  |  | 0.389  | NA     | -0.009 |
| A011046_01 |        | 0.093  | -0.229 | 0.334  | 0.168  | -0.028 |  | -0.127 | -0.525 | -0.585 |
| A011048_01 | NA     | NA     |        | 0.208  | 0.161  | NA     |  | -0.354 | 0.022  | -0.021 |
| A011054_01 |        | 0.114  | -0.102 | -0.201 | -0.119 | -0.278 |  | -0.304 | 0.13   | 0.102  |
| A011055_01 |        | 0.083  | -0.11  | -0.084 | -0.181 | -0.402 |  | -0.41  | -0.176 | -0.159 |
| A011064_01 |        | -0.258 | -0.314 | -0.219 | -0.224 | -0.093 |  | -0.123 | 0.289  | 0.225  |
| A011068_01 |        | -0.074 | 0.088  | 0.048  | -0.003 | 0.347  |  | 0.451  | -0.288 | -0.117 |
| A011077_01 | NA     | NA     |        | -0.555 | NA     | NA     |  | 0.154  | NA     | NA     |
| A011078_01 |        | -0.274 | -0.415 | 0.453  | 0.575  | 0.08   |  | 0.129  | -0.347 | -0.401 |
| A011085_01 |        | 0.061  | -0.074 | 0.344  | 0.242  | -0.432 |  | -0.485 | 0.238  | 0.114  |
| A011089_01 |        | 0.283  | 0.298  | 0.078  | -0.229 | 0.252  |  | 0.097  | -0.187 | -0.165 |
| A011090_01 |        | 0.441  | 0.398  | 0.084  | 0.264  | NA     |  | -0.041 | 0.083  | -0.147 |
| A011094_01 |        | 0.19   | 0.086  | -0.242 | -0.199 | 0.04   |  | 0.023  | 0.076  | -0.041 |
| A011096_01 |        | 0.388  | NA     | NA     | -0.279 | NA     |  | 0.262  | NA     | 0.227  |
| A011104_01 |        | 0.171  | NA     | 0.256  | 0.164  | 0.126  |  | 0.172  | NA     | -0.359 |
| A011108_01 |        | 0.178  | NA     | -0.121 | -0.383 | 0.071  |  | -0.239 | 0.182  | 0.039  |
| A011109_01 |        | 0.286  | 0.373  | 0.017  | -0.011 | 0.26   |  | 0.408  | -0.072 | -0.091 |
| A011114_01 |        | 0.108  | 0.367  | 0.177  | 0.013  | 0.328  |  | 0.385  | NA     | 0.261  |
| A011121_01 |        | -0.289 | -0.368 | 0.078  | -0.11  | -0.029 |  | -0.112 | 0.107  | 0.078  |
| A011124_01 |        | 0.374  | 0.098  | 0.15   | 0.273  | NA     |  | -0.021 | 0.211  | 0.014  |
| A011130_01 |        | 0.11   | 0.473  | 0.19   | 0.109  | 0.405  |  | 0.571  | 0.328  | 0.221  |
| A011132_01 |        | 0.138  | -0.072 | -0.099 | 0.008  | -0.07  |  | 0.145  | -0.092 | NA     |
| A011133_01 |        | -0.113 | -0.074 | 0.149  | 0.118  | -0.492 |  | -0.74  | 0.429  | 0.331  |
| A011142_01 |        | -0.004 | -0.163 | -0.131 | 0.09   | -0.075 |  | 0.068  | 0.142  | -0.04  |
| A011146_01 |        | -1.024 | -1.109 | -2.704 | -2.515 | 0.14   |  | 0.59   | -1.796 | -1.564 |
| A011148_01 |        | 0.098  | 0.013  | 0.031  | -0.038 | -0.873 |  | -0.916 | NA     | 0.064  |
| A011153_01 |        | -0.197 | -0.335 | -0.083 | -0.123 | -0.065 |  | -0.103 | NA     | -0.107 |
| A011159_01 |        | -0.314 | -0.373 | -0.025 | 0.148  | -0.118 |  | -0.168 | 0.003  | 0.16   |
| A011163_01 |        | 0.346  | NA     | 0.137  | -0.005 | NA     |  | -0.566 | NA     | -0.088 |
| A011164_01 |        | 0.054  | NA     | 0.166  | 0.007  | NA     |  | NA     | 0.209  | -0.069 |
| A011167_01 |        | 0.16   | 0.1    | -0.104 | 0.058  | -0.153 |  | -0.109 | -0.185 | -0.209 |
| A011171_01 |        | -0.12  | -0.053 | 0.093  | -0.109 | 0.159  |  | 0.267  | 0.066  | 0.013  |
| A011187_01 |        | 0.445  | NA     | 0.664  | 0.583  | 0.892  |  | 1.23   | NA     | 0.044  |
| A011189_01 |        | 0.313  | 0.233  | 0.141  | 0.079  | 0.106  |  | 0.111  | 0.277  | 0.093  |
| A011190_01 |        | 0.26   | 0.212  | 0.162  | 0.077  | -0.887 |  | -0.996 | -0.504 | -0.334 |
| A011193_01 |        | 0.367  | 0.383  | 0.924  | 0.662  | 0.17   |  | 0.016  | -0.363 | -0.247 |
| A011194_01 |        | -0.182 | NA     | -0.066 | -0.265 | -0.375 |  | -0.545 | 0.162  | 0.041  |
| A011198_01 |        | -0.327 | -0.588 | -1.712 | -1.725 | -1.516 |  | -1.306 | -0.428 | -0.565 |
| A011199_01 |        | -0.255 | -0.26  | 0.386  | 0.21   | 0.504  |  | 0.495  | -0.146 | -0.275 |
| A011200_01 |        | 0.093  | 0.114  | -0.005 | -0.12  | 0.405  |  | 0.437  | 0.08   | 0.037  |
| A011203_01 |        | -0.23  | NA     | -0.394 | -0.308 | NA     |  | 0.204  | NA     | 0.177  |
| A011208_01 |        | -0.068 | NA     | -0.088 | NA     |        |  | 0.357  | 0.52   | NA     |
| A011223_01 |        | -0.069 | -0.226 | 0.004  | -0.041 | -0.119 |  | -0.198 | -0.041 | -0.015 |
| A011226_01 |        | 0.162  | NA     | 0.016  | NA     | NA     |  | -0.244 | NA     | NA     |
| A011227_01 | NA     |        | -0.438 | 0.482  | 0.233  | 0.49   |  | 0.783  | -0.906 | -0.861 |

|            |           |           |           |           |        |           |           |        |
|------------|-----------|-----------|-----------|-----------|--------|-----------|-----------|--------|
| A011228_01 | -0.189    | -0.275    | -0.728    | -0.658    | 0.268  | 0.33      | 0.088     | 0.15   |
| A011231_01 | 0.157     | 0.1       | -0.289    | -0.089    | -0.081 | -0.108    | 0.155     | -0.081 |
| A011242_01 | -0.127    | -0.108    | -0.093    | -0.091    | 0.292  | 0.334     | 0.049     | 0.004  |
| A011250_01 | 0.221     | 0.169     | 0.117     | -0.152    | 0.163  | -0.073    | 0.11      | -0.056 |
| A011263_01 | 0.156     | -0.042    | -0.065    | -0.161    | 0.162  | 0.032     | 0.088     | -0.087 |
| A011267_01 | -0.169    | -0.228    | -0.036    | -0.095    | -0.359 | -0.503    | -0.441    | -0.441 |
| A011270_01 | 0.227 NA  |           | 0.246     | 0.155 NA  | NA     |           | -0.056    | 0.069  |
| A011274_01 | -0.747    | -0.588    | -0.656    | -0.86     | -0.576 | -0.655    | -0.035    | -0.139 |
| A011285_01 | 0.049     | -0.001    | 0.211     | 0.048     | 0.467  | 0.583     | -0.103    | -0.048 |
| A011288_01 | 0.239 NA  |           | 0.019     | 0.08 NA   | NA     | NA        | NA        |        |
| A011296_01 | 0.479 NA  |           | 0.107     | 0.312 NA  |        | -0.363    | 0.099     | -0.005 |
| A011301_01 | 0.012     | 0.132     | 0.105     | -0.117    | 0.248  | 0.311     | 0.091     | 0.232  |
| A011304_01 | -0.316    | -0.076    | -0.039    | -0.227    | -0.513 | -0.448    | -0.284    | -0.052 |
| A011306_01 | 0.408 NA  |           | 0.183     | 0.206     | -0.162 | -0.179 NA |           | -0.255 |
| A011307_01 | -0.138    | 0.158     | -0.454    | -0.376    | -0.226 | -0.075    | -0.454    | -0.121 |
| A011311_01 | 0.499     | 0.157     | 0.113     | 0.146     | 0.526  | 0.401     | 0.019     | -0.111 |
| A011320_01 | -2.036    | -1.856 NA | NA        | NA        | NA     | NA        | NA        |        |
| A011322_01 | 0.454     | 0.401     | 0.271     | 0.198     | 0.642  | 0.591     | 0.055     | -0.013 |
| A011323_01 | -0.089    | -0.167    | -0.23     | 0.149     | 0.084  | 0.082     | -0.47     | -0.581 |
| A011326_01 | -0.133 NA |           | -0.05     | 0.16      | -0.199 | 0.032     | 0.202     | 0.332  |
| A011331_01 | -0.315    | -0.309    | -0.861    | -0.662    | -0.008 | 0.014     | 0.119     | 0.299  |
| A011336_01 | -0.091    | -0.246    | 0.117     | 0.159     | 0.441  | 0.533     | 0.008     | -0.012 |
| A011338_01 | -0.096 NA | NA        |           | 0.165     | 0.717  | 0.749 NA  |           | 0.196  |
| A011339_01 | -0.191    | -0.012    | -0.389    | -0.428    | 0.292  | 0.343     | 0.152     | 0.402  |
| A011341_01 | -0.038 NA | NA        | NA        |           | -0.215 | -0.28 NA  |           | 0.227  |
| A011342_01 | 0.059 NA  |           | 0.21      | 0.202     | -0.961 | -1.279    | -0.225    | -0.279 |
| A011343_01 | -0.025    | 0.063     | -0.12     | -0.098    | -1.024 | -1.336    | 0.024     | -0.041 |
| A011344_01 | -1.014    | -0.766    | 0.155     | 0.255     | -0.194 | 0.007     | -0.318    | -0.15  |
| A011349_01 | 0.065 NA  |           | 0.001 NA  | NA        |        | -0.104 NA |           | 0.227  |
| A011356_01 | -0.255 NA |           | -0.072    | -0.039 NA | NA     | NA        |           | 0.052  |
| A011359_01 | -1.077    | -0.851    | -0.919    | -0.835    | -0.174 | 0.605     | -0.169    | 0.105  |
| A011361_01 | -0.175    | -0.009    | 0.018     | 0.004     | 0.027  | 0.077     | -0.062    | 0.183  |
| A011372_01 | -0.396 NA |           | -0.192 NA | NA        |        | -0.587 NA | NA        |        |
| A011374_01 | 0.1       | -0.072    | -0.047    | -0.224    | 0.248  | 0.065     | 0.194     | 0.012  |
| A011382_01 | -0.191    | -0.122    | 0.047     | 0.069     | -0.078 | -0.054    | -0.13     | -0.045 |
| A011384_01 | -0.047    | -0.176    | 0.027     | -0.057    | -0.173 | -0.19     | 0.048     | 0.036  |
| A011385_01 | 0.162     | -0.041    | 0.059     | -0.038    | -0.165 | -0.573    | 0.326     | 0.161  |
| A011387_01 | 0.179 NA  |           | -0.291    | -0.064    | 0.056  | 0.005 NA  | NA        |        |
| A011390_01 | 0.335 NA  |           | 0.333 NA  |           | -0.346 | -0.495 NA | NA        |        |
| A011395_01 | 0.341     | 0.359     | 0.182     | 0.107     | 0.107  | 0.179     | 0.143     | 0.19   |
| A011396_01 | -0.72     | -0.637    | -0.206    | -0.096    | -0.867 | -0.808    | 0.088     | 0.256  |
| A011397_01 | -0.468    | -0.202    | -0.109    | 0.064     | -0.09  | -0.008    | 0.04      | 0.198  |
| A011407_01 | 0.39      | 0.664     | 0.173     | 0.208     | 0.338  | 0.514     | -0.108    | 0.113  |
| A011414_01 | 0.425     | 0.217     | 0.182     | -0.105    | 0.028  | -0.361 NA |           | -0.054 |
| A011416_01 | 0.325     | 0.329     | 0.175     | 0.081     | 0.195  | -0.021    | 0.009     | -0.039 |
| A011419_01 | -1.135    | -0.956    | -0.489    | -0.481    | -0.306 | -0.153    | -0.258    | 0.03   |
| A011422_01 | 0.145     | -0.081    | -0.167    | -0.23     | 0.235  | 0.188     | 0.25      | 0.084  |
| A011426_01 | 0.143 NA  |           | 0.079     | 0.048 NA  | NA     |           | 0.096     | 0.134  |
| A011428_01 | 0.302 NA  |           | -0.085    | -0.131    | 0.569  | 0.491     | 0.413     | 0.352  |
| A011429_01 | 0.006     | 0.262     | -0.131    | -0.271    | 0.246  | 0.25      | -0.242 NA |        |
| A011435_01 | 0.352 NA  |           | 0.01      | -0.084 NA | NA     |           | 0.166     | 0.151  |
| A011436_01 | -0.672    | -0.625 NA | NA        |           | 0.63   | 0.671 NA  |           | -0.016 |
| A011441_01 | 0.005     | 0.17      | -0.347    | -0.31     | 0.387  | 0.748     | 0.06      | 0.184  |
| A011445_01 | 0.05      | 0.183     | 0.262     | 0.01      | 0.158  | 0.127     | -0.133    | 0.042  |
| A011446_01 | 0.144     | 0.26      | -0.154 NA |           | -0.173 | -0.203 NA | NA        |        |
| A011452_01 | 0.063     | 0.052     | -0.103    | -0.233    | -0.17  | -0.321    | 0.072     | 0.132  |
| A011455_01 | 0.118     | 0.057     | -0.148    | -0.082    | 0.085  | 0.158     | 0.105     | 0.064  |
| A011460_01 | NA        | -0.019    | -0.374    | -0.324    | -0.092 | -0.129    | -0.172    | -0.178 |
| A011461_01 | NA        | NA        | -0.038    | 0.179     | -0.339 | -0.299    | -0.155    | 0.027  |
| A011462_01 | 0.079 NA  | NA        |           | 0.06      | -0.323 | -0.339 NA | NA        |        |
| A011471_01 | 0.187 NA  |           | 0.181     | 0.104 NA  | NA     | NA        | NA        |        |
| A011472_01 | -0.19     | -0.23     | 0.155     | -0.07     | 0.329  | 0.211     | 0.171     | -0.002 |
| A011474_01 | -0.051    | -0.027    | 0.118     | -0.069    | 0.094  | 0.108     | -0.197    | 0.167  |
| A011478_01 | 0.504     | 0.438     | 0.08      | 0.028     | 0.481  | 0.274     | 0.064     | 0.078  |
| A011479_01 | -0.095    | -0.156    | -0.189    | -0.057    | -0.435 | -0.724    | 0.061     | 0.075  |
| A011480_01 | 0.187     | 0.047     | 0.012     | 0.068     | -0.198 | -0.534    | 0.1       | 0.043  |
| A011486_01 | -0.273    | -0.126    | 0.214     | -0.036    | 0.126  | 0.079     | 0.102     | 0.232  |
| A011487_01 | -0.034 NA |           | 0.347     | 0.368     | 0.312  | 0.607     | 0.224     | 0.263  |

|            |    |           |           |          |           |        |           |           |        |
|------------|----|-----------|-----------|----------|-----------|--------|-----------|-----------|--------|
| A011489_01 |    | -0.383    | -0.604    | -0.682   | -0.651    | 0.291  | 0.126 NA  | NA        |        |
| A011491_01 |    | 0.042 NA  |           | 0.264    | 0.214     | -0.381 | -0.436 NA | NA        |        |
| A011505_01 |    | 0.001     | 0.15      | 0.012    | -0.055    | 0.071  | -0.032    | -0.107    | -0.058 |
| A011508_01 |    | -0.139    | 0.006     | 0.124    | -0.137    | -0.167 | -0.134    | -0.143    | -0.062 |
| A011510_01 |    | 0.284     | 0.18      | -0.144   | -0.407    | 0.251  | 0.107     | 0.112     | 0.199  |
| A011511_01 |    | -0.233    | -0.375    | -0.18    | -0.247    | -0.125 | -0.128    | -0.012    | -0.048 |
| A011512_01 |    | 0.162     | 0.032     | -0.116   | -0.092    | 0.176  | 0.071 NA  | NA        |        |
| A011521_01 |    | -0.03     | -0.061    | 0.194    | 0.032     | -0.094 | -0.149    | 0.095     | 0.094  |
| A011522_01 |    | 0.238     | 0.147     | 0.193    | 0.026     | -0.039 | -0.337    | 0.1       | 0.034  |
| A011523_01 |    | -0.533    | -0.557 NA |          | -0.545    | -0.564 | -0.392 NA | NA        |        |
| A011526_01 |    | 0.033     | -0.096    | -0.043   | 0.166     | -0.122 | 0.067     | 0.257     | 0.337  |
| A011532_01 |    | 0.33      | 0.43      | -0.431   | -0.2      | 0.549  | 0.81      | 0.405     | 0.47   |
| A011533_01 |    | 0.072 NA  |           | 0.224    | 0.238     | -0.472 | -0.687    | 0.024     | 0.195  |
| A011535_01 |    | 0.017     | -0.073    | -0.203   | -0.217    | 0.39   | 0.313     | 0.166     | 0.23   |
| A011536_01 | NA |           | -0.31     | -0.08 NA | NA        |        | 0.067 NA  | NA        |        |
| A011539_01 |    | 0.07      | -0.071    | -0.047   | -0.027    | 0.024  | -0.145    | 0.123     | 0.044  |
| A011540_01 |    | 0.107     | 0.177     | 0.049    | -0.072    | 0.105  | 0.148     | -0.193    | 0.176  |
| A011541_01 |    | 0.636 NA  |           | 0.477    | 0.245     | 0.143  | -0.872 NA |           | -0.213 |
| A011544_01 |    | 0.331     | 0.131     | -0.186   | 0.016     | -0.441 | -0.453    | -0.052    | -0.191 |
| A011546_01 |    | 0.411     | 0.114     | 0.284    | 0.043     | 0.199  | 0.065     | 0.255     | -0.032 |
| A011548_01 | NA |           | -2.453    | -1.976   | -1.867 NA |        | -4.065    | -2.428 NA |        |
| A011550_01 |    | -0.013 NA |           | 0.11     | 0.155     | 0.762  | 0.947     | 0.023     | 0.076  |
| A011557_01 |    | -0.199 NA |           | 0.225    | 0.405     | -0.378 | -0.266    | -0.104    | -0.135 |
| A011566_01 |    | 0.257     | 0.382     | 0.15     | -0.069    | 0.203  | 0.075     | 0.017     | -0.03  |
| A011569_01 |    | -0.217    | -0.308    | -0.124   | -0.12     | -0.069 | -0.289    | -0.03     | -0.329 |
| A011571_01 |    | 0.138 NA  | NA        |          | -0.089    | -0.22  | -0.489 NA | NA        |        |
| A011574_01 |    | -0.184    | -0.281    | 0.468    | 0.225     | 0.222  | 0.05      | -0.178    | -0.098 |
| A011575_01 |    | -0.119    | -0.201    | -0.145   | 0.049     | -0.047 | 0.174     | 0.255     | 0.211  |
| A011576_01 |    | 0.269     | -0.021    | -0.178   | -0.179    | 0.207  | 0.204     | 0.115     | -0.049 |
| A011584_01 |    | 0.221     | 0.249     | -0.007   | -0.082    | 0.276  | 0.263     | 0.155     | 0.258  |
| A011585_01 |    | 0.427     | 0.488     | 0.21     | 0.133     | -0.048 | -0.157 NA |           | 0.015  |
| A011589_01 |    | 0.149     | 0.084     | -0.026   | -0.175    | 0.198  | 0.067 NA  |           | -0.012 |
| A011592_01 |    | 0.271 NA  |           | -0.134   | -0.104    | -0.071 | 0.029 NA  |           | 0.042  |
| A011593_01 |    | 0.337     | 0.41      | 0.05     | 0.131 NA  |        | -0.354    | -0.11     | -0.04  |
| A011600_01 |    | -0.491    | -0.226    | 0.208    | 0.035     | 0.008  | 0.102     | -0.052    | 0.196  |
| A011601_01 | NA |           | -0.01     | -0.708   | -0.573 NA | NA     |           | -1.205 NA |        |
| A011604_01 |    | -0.083    | -0.153    | -0.197   | -0.165    | -0.051 | -0.159    | 0.089     | 0.018  |
| A011606_01 |    | -0.442    | -0.412    | -0.51    | -0.509    | -0.49  | -0.524 NA |           | -0.158 |
| A011607_01 | NA |           | 0.29      | 0.346    | 0.13      | 0.095  | -0.065    | -0.347    | -0.288 |
| A011610_01 |    | -0.101    | 0.065     | 0.31     | 0.39      | 0.009  | 0.189     | -0.241    | -0.149 |
| A011611_01 |    | 0.013 NA  |           | -0.317   | -0.262    | -0.073 | -0.073    | 0.274     | 0.226  |
| A011613_01 | NA |           | 0.644     | 0.267    | 0.213 NA  |        | -0.077    | 0.058     | 0.14   |
| A011614_01 |    | -1.567    | -1.25     | 0.074    | -0.071    | -1.669 | -1.623    | -0.799    | -0.422 |
| A011619_01 |    | 0.332     | 0.389     | 0.184    | 0.117     | -0.564 | -0.905    | -0.135 NA |        |
| A011622_01 |    | 0.566     | 0.605     | 0.024    | 0.034     | 0.221  | 0.297     | -0.213    | -0.15  |
| A011624_01 |    | 0.057 NA  |           | 0.369    | 0.282     | 0.341  | 0.588 NA  | NA        |        |
| A011625_01 |    | -0.101    | 0.009     | -0.38    | 0.008     | -0.119 | -0.064    | 0.26 NA   |        |
| A011629_01 |    | -0.134    | 0.067     | 0.007    | -0.259    | -0.225 | -0.353    | -0.042    | 0.003  |
| A011630_01 |    | 0.192     | 0.127     | -0.05 NA |           | -0.062 | 0 NA      | NA        |        |
| A011631_01 |    | 0.304     | 0.338     | -0.071   | -0.037    | 0.311  | 0.222     | 0.261     | 0.246  |
| A011634_01 |    | -0.393    | -0.334    | -0.081   | 0.266     | -0.48  | -0.473    | 0.141     | -0.017 |
| A011637_01 | NA | NA        |           | 0.293    | 0.26 NA   |        | -0.187 NA | NA        |        |
| A011650_01 |    | -0.433    | -0.227    | 0.007    | -0.021    | -0.851 | -1.028    | -0.119    | -0.298 |
| A011652_01 |    | -0.054    | 0.109     | -0.064   | 0.024     | 0.052  | 0.222 NA  |           | -0.053 |
| A011653_01 |    | -0.027    | 0.068     | -0.066   | -0.183    | 0.052  | 0.164     | -0.025    | -0.02  |
| A011654_01 |    | 0.186     | -0.052    | 0.079    | 0.006     | 0.159  | 0.073     | 0.014     | 0.02   |
| A011655_01 |    | 0.291     | 0.19      | 0.04     | 0.061     | 0.382  | 0.414     | 0.127 NA  |        |
| A011658_01 |    | 0.43      | 0.706     | -0.64    | -0.42     | -0.522 | -0.375    | -0.352    | -0.238 |
| A011661_01 |    | -0.029    | 0.008     | -0.07    | 0.002     | -0.043 | 0.015     | 0.174     | 0.133  |
| A011662_01 |    | -0.462    | -0.59     | -0.52    | -0.152    | -0.939 | -0.858    | -0.122    | -0.11  |
| A011663_01 |    | -0.033    | -0.016    | -0.315   | -0.172    | 0.113  | 0.161 NA  |           | -0.151 |
| A011665_01 |    | 0.289     | 0.408     | -0.213   | -0.196    | 0.029  | -0.048    | -0.656    | -0.631 |
| A011666_01 |    | -0.385    | -0.419    | -0.254   | -0.329    | -0.722 | -0.664 NA | NA        |        |
| A011671_01 |    | -0.171    | -0.013    | -0.128   | -0.022    | -0.711 | -0.391    | -0.644    | -0.048 |
| A011672_01 |    | 0.352 NA  |           | 0.086    | -0.036 NA | NA     | NA        | NA        |        |
| A011673_01 |    | 0.524     | 0.209     | 0.272    | 0.14      | -0.806 | -0.923    | -1.393    | -1.654 |
| A011674_01 |    | 0.112     | 0.204     | 0.202    | 0.344     | -0.417 | -0.531    | 0.077     | 0.128  |
| A011675_01 |    | 0.159 NA  |           | 0.435    | 0.398 NA  | NA     |           | -0.171    | -0.05  |

|            |           |        |          |           |        |           |           |        |
|------------|-----------|--------|----------|-----------|--------|-----------|-----------|--------|
| A011677_01 | 0.471     | 0.255  | 0.101    | 0.164     | 0.341  | 0.259     | 0.166     | 0.034  |
| A011678_01 | -0.01     | -0.353 | 0.148    | 0.216 NA  |        | -0.471 NA | NA        |        |
| A011687_01 | 0.086     | 0.116  | 0.165    | 0.132     | 0.077  | -0.007    | 0.084     | 0.101  |
| A011689_01 | 0.087     | -0.029 | 0.373    | 0.222     | -0.315 | -0.517    | -0.596    | -0.403 |
| A011691_01 | 0.472     | 0.292  | -0.166   | -0.059    | 0.078  | -0.092    | 0.186     | -0.003 |
| A011692_01 | 0.066     | 0.277  | 0.157    | 0.069     | 0.342  | 0.426     | 0.099     | 0.232  |
| A011693_01 | 0.202 NA  |        | 0.106    | 0.112 NA  |        | 0.227 NA  |           | -0.067 |
| A011694_01 | 0.276     | 0.382  | 0.17     | 0.236     | 0.442  | 0.457     | -0.296    | -0.24  |
| A011695_01 | 0.172     | 0.395  | -0.078   | 0.037     | -0.34  | -0.197    | 0.021     | 0.182  |
| A011696_01 | 0.318     | 0.244  | -0.026   | 0.122 NA  |        | -0.369    | -0.149 NA |        |
| A011700_01 | -0.224    | 0.15   | 0.025    | -0.121    | 0.094  | 0.286     | -0.066    | 0.337  |
| A011703_01 | 0.33 NA   |        | 0.244 NA |           | 0.185  | 0.173 NA  | NA        |        |
| A011712_01 | 0.482 NA  |        | 0.205    | 0.357 NA  | NA     |           | -0.037    | -0.141 |
| A011713_01 | -0.067 NA |        | 0.09     | -0.224 NA | NA     |           | 0.186     | 0.106  |
| A011716_01 | 0.542     | 0.342  | 0.066    | 0.001     | 0.179  | 0.178     | 0.16      | 0.109  |
| A011717_01 | -0.52     | -0.159 | 0.031    | 0.105     | -0.627 | -0.783    | -0.208    | -0.156 |
| A011718_01 | 0.24 NA   |        | 0.029    | 0.053     | 0.42   | 0.437     | -0.429    | -0.115 |
| A011719_01 | 0.401     | 0.676  | 0.099    | -0.026 NA | NA     |           | -0.072    | 0.149  |
| A011720_01 | -0.255    | -0.054 | 0.217    | 0.346     | 0.138  | 0.361     | -0.211    | 0.055  |
| A011722_01 | -0.51     | -0.3   | 0.007    | -0.275    | -0.813 | -0.949    | -0.191    | -0.086 |
| A011724_01 | -0.09     | 0.047  | 0.082    | -0.201    | 0.26   | 0.307     | 0.012     | 0.405  |
| A011725_01 | 0.312 NA  |        | 0.018    | 0.055 NA  | NA     | NA        |           | -0.001 |
| A011726_01 | -0.041    | 0.206  | -0.155   | 0.102     | 0.638  | 0.713     | -0.002    | 0.246  |
| A011728_01 | 0.206 NA  |        | 0.258    | 0.11      | 0.184  | 0.124 NA  |           | -0.332 |
| A011732_01 | 0.11      | 0.199  | 0.523    | 0.319     | 0.432  | 0.508     | -0.358    | -0.248 |
| A011740_01 | 0.196 NA  |        | 0.757    | 0.72 NA   | NA     |           | -0.266    | -0.262 |
| A011743_01 | 0.181     | 0.332  | -0.442   | -0.351    | 0.107  | -0.012    | 0.122     | 0.021  |
| A011749_01 | -0.139 NA |        | -0.07 NA | NA        |        | -0.239 NA | NA        |        |
| A011750_01 | -0.174    | 0.045  | -0.295   | -0.225    | -0.04  | 0.136     | 0.176     | 0.175  |
| A011752_01 | 0.05      | 0.177  | 0.188    | 0.056     | 0.047  | 0.08      | -0.105    | -0.032 |
| A011755_01 | 0.035     | 1.122  | -0.008   | 0.161     | 0.297  | 0.668     | -0.235    | 0.413  |
| A011757_01 | 0.086     | 0.171  | 0.165    | 0.15      | -0.166 | -0.115    | -0.106    | -0.043 |
| A011758_01 | 0.509     | 0.354  | -0.096   | -0.1      | 0.597  | 0.538     | 0.128     | 0.082  |
| A011760_01 | -0.036    | 0.22   | -0.188   | -0.141    | -0.383 | -0.396    | -0.185    | 0.03   |
| A011761_01 | -0.265    | -0.215 | 0.049    | 0.246     | -0.234 | -0.249    | -0.051    | 0.034  |
| A011762_01 | -0.272    | -0.316 | -0.196   | -0.37     | -0.232 | -0.153 NA |           | -0.019 |
| A011763_01 | 0.31      | 0.512  | -0.111   | 0.14      | -0.348 | -0.206    | -0.011    | 0.158  |
| A011764_01 | 0.189     | 0.13   | 0.286    | 0.228     | 0.133  | 0.037     | -0.095    | -0.174 |
| A011766_01 | -0.07     | -0.009 | 0.404    | 0.525     | -0.545 | -0.741    | -0.536    | -0.439 |
| A011767_01 | 0.093     | 0.181  | -0.151   | -0.102    | 0.068  | 0.168     | 0.179     | 0.293  |
| A011769_01 | -0.033    | -0.141 | 0.062    | 0.174     | 0.744  | 1.03      | 0.077     | -0.063 |
| A011770_01 | 0.2       | -0.031 | 0.007    | 0.002     | 0.065  | 0.142     | 0.229     | -0.054 |
| A011772_01 | 0.234     | -0.017 | 0.396    | 0.346     | -0.301 | -0.573 NA |           | -0.548 |
| A011773_01 | 0.325 NA  |        | 0.291    | 0.414 NA  | NA     | NA        |           | -0.179 |
| A011774_01 | -0.011    | -0.028 | 0.04     | -0.109    | -0.017 | 0.022     | -0.199    | -0.117 |
| A011775_01 | -0.082    | 0.069  | 0.171    | -0.043    | 0.048  | 0.063     | -0.036    | -0.148 |
| A011777_01 | 0.93      | 1.052  | 0.652    | 0.488     | 0.748  | 0.604     | -0.263    | -0.127 |
| A011778_01 | 0.358     | 0.263  | -0.017   | -0.141    | -0.046 | -0.025    | -0.118    | -0.068 |
| A011779_01 | -0.085    | -0.057 | -0.045   | -0.119    | 0.173  | 0.148     | 0.015     | -0.069 |
| A011780_01 | 0.243     | -0.056 | -0.023   | -0.054    | 0.183  | 0.096     | 0.168     | -0.035 |
| A011781_01 | -0.238    | -0.235 | 0.51     | 0.234     | 0.606  | 0.794     | 0.099     | -0.012 |
| A011782_01 | 0.198 NA  |        | 0.111    | 0.189     | -0.689 | -0.787 NA | NA        |        |
| A011784_01 | 0.15      | 0.078  | 0.149    | 0.176     | -0.049 | -0.262    | -0.083    | -0.162 |
| A011788_01 | -0.225    | -0.128 | -0.276   | -0.34     | 0.453  | 0.542     | 0.319     | 0.246  |
| A011793_01 | 0.08      | 0.123  | 0.225    | 0.458     | 0.065  | 0.207     | -0.2      | -0.025 |
| A011795_01 | 0.307     | 0.155  | -0.281   | -0.14     | -0.544 | -0.83     | 0.68      | 0.665  |
| A011797_01 | 0.382     | 0.542  | 0.128    | -0.112 NA |        | 0.016 NA  | NA        |        |
| A011798_01 | 0.123     | -0.13  | -0.01    | 0.108     | 0.141  | 0.147     | 0.065     | -0.03  |
| A011800_01 | 0.233     | 0.119  | 0.029    | -0.068    | 0.375  | 0.273     | 0.283     | -0.043 |
| A011802_01 | 0.212     | 0.17   | -0.159   | -0.192    | 0.094  | -0.015    | 0.186     | 0.23   |
| A011806_01 | 0.151     | 0.019  | 0.008    | -0.186    | -0.217 | -0.418    | 0.264     | 0.229  |
| A011807_01 | -0.212    | 0.026  | 0.061    | 0.055     | 0.557  | 0.803     | 0.105     | 0.233  |
| A011808_01 | -0.41 NA  |        | -0.163   | -0.1      | -1.027 | -1.137 NA | NA        |        |
| A011810_01 | 0.36      | 0.483  | -0.109   | 0.124     | -0.603 | -0.62     | 0.377     | 0.547  |
| A011811_01 | -0.865    | -0.888 | -1.833   | -1.606    | -0.061 | 0.407     | -0.685    | -0.621 |
| A011812_01 | -0.108    | 0.07   | -0.083   | -0.222    | 0.025  | -0.018    | 0.163     | 0.112  |
| A011813_01 | -0.051    | 0.049  | -0.21    | -0.228    | -0.035 | 0.072     | -0.081    | 0.235  |
| A011814_01 | -0.096    | -0.053 | 0.184    | 0.253     | -0.87  | -1.103    | -0.241    | -0.349 |

|            |           |        |           |           |        |           |        |        |
|------------|-----------|--------|-----------|-----------|--------|-----------|--------|--------|
| A011816_01 | 0.589     | 0.103  | 0.128     | -0.177    | -0.308 | -0.473    | 0.375  | 0.126  |
| A011817_01 | 0.591     | 0.314  | -0.363    | -0.202    | -0.368 | -0.53     | 0.444  | 0.284  |
| A011819_01 | 0.422     | 0.534  | -0.338    | -0.467    | 0.264  | 0.426     | -0.192 | -0.135 |
| A011820_01 | 0.212     | 0.005  | -0.797    | -0.704    | 0.65   | 0.699     | -0.005 | -0.138 |
| A011822_01 | -0.154    | -0.195 | 0.111     | 0.112     | -0.841 | -1.014    | -0.039 | 0.039  |
| A011825_01 | 0.135 NA  |        | -0.198    | -0.073 NA |        | 0.15 NA   |        | 0.097  |
| A011826_01 | 0.103     | 0.032  | -0.119    | -0.011    | -0.19  | -0.217    | 0.005  | -0.022 |
| A011830_01 | -0.05     | -0.062 | 0.093     | 0.028     | 0.03   | -0.017    | 0.261  | 0.293  |
| A011831_01 | -0.11     | 0.024  | -0.074    | -0.139    | 0.058  | 0.095     | -0.108 | -0.152 |
| A011838_01 | 0.025 NA  |        | -0.009    | -0.028    | 0.135  | -0.103 NA | NA     |        |
| A011842_01 | 0.282     | 0.205  | -0.01     | -0.112    | 0.152  | -0.011    | 0.074  | -0.093 |
| A011843_01 | -0.343    | 0.141  | -0.036    | 0.101     | -0.307 | -0.3      | -0.117 | 0.023  |
| A011844_01 | 0.393     | 0.401  | 0.282     | 0.095     | 0.505  | 0.358     | -0.052 | 0.149  |
| A011852_01 | 0.07      | 0.077  | -0.146    | -0.005    | 0.021  | -0.064    | -0.04  | 0.02   |
| A011853_01 | 0.015     | 0.045  | 0.12      | 0.169     | 0.204  | 0.36      | -0.187 | -0.122 |
| A011854_01 | 0.358     | 0.236  | 0.213     | 0.263     | 0.46   | 0.487     | -0.078 | -0.144 |
| A011855_01 | 0.164     | -0.075 | -0.372    | -0.283    | -0.241 | -0.296    | 0.017  | 0.149  |
| A011856_01 | -0.033 NA |        | 0.035     | 0.103 NA  |        | 0.378 NA  |        | 0.072  |
| A011858_01 | -0.006    | -0.144 | 0.078     | 0.048     | -0.194 | -0.468    | -0.284 | -0.373 |
| A011859_01 | -0.054    | -0.029 | -0.147    | 0.013     | -0.26  | -0.277    | -0.134 | -0.159 |
| A011861_01 | -1.263    | -1.333 | -0.634    | -0.516    | -1.38  | -1.478    | -0.66  | -0.894 |
| A011862_01 | 0.36      | 0.164  | 0.185     | 0.199     | 0.263  | 0.466     | 0.051  | 0.134  |
| A011864_01 | 0.755 NA  |        | 0.622     | 0.291     | 0.702  | 0.539 NA  |        | -0.217 |
| A011865_01 | 0.368 NA  |        | 0.115     | 0.057     | 0.044  | -0.195 NA | NA     |        |
| A011866_01 | 0.121     | 0.185  | -0.085    | 0.053     | -0.069 | -0.03     | 0.051  | 0.101  |
| A011870_01 | 0.172 NA  |        | -0.127 NA |           | 0.101  | 0.024 NA  |        | 0.057  |
| A011872_01 | 0.207 NA  |        | 0.357     | 0.089 NA  | NA     | NA        |        | -0.065 |
| A011874_01 | 0.134     | -0.208 | 0         | -0.283    | 0.256  | 0.16      | 0.19   | -0.234 |
| A011875_01 | 0.128     | -0.021 | -0.246    | -0.003    | -0.121 | 0.084     | 0.015  | 0.011  |
| A011877_01 | 0.34      | -0.087 | -0.232    | -0.016    | -0.054 | -0.058    | 0.164  | -0.033 |
| A011881_01 | 0.217     | 0.056  | 0.014     | -0.131    | 0.249  | 0.156     | 0.104  | -0.008 |
| A011885_01 | 0.02      | -0.141 | 0.035     | -0.081    | 0.145  | 0.099     | 0.152  | 0.124  |
| A011887_01 | 0.053 NA  |        | -0.576    | -0.625    | 0.482  | 0.473     | 0.567  | 0.632  |
| A011888_01 | -0.071    | 0.014  | 0.114     | 0.406     | -0.342 | -0.11     | -0.313 | -0.29  |
| A011889_01 | -0.016 NA |        | -0.031    | -0.017    | 1.154  | 1.586     | 0.062  | 0.418  |
| A011890_01 | -0.289    | -0.136 | -0.138    | -0.047    | -0.135 | -0.126    | -0.114 | -0.048 |
| A011895_01 | -0.002 NA |        | 0.042     | 0.012     | 0.053  | 0.187     | -0.174 | -0.445 |
| A011896_01 | 0.149     | 0.291  | -0.028    | 0.008     | 0.02   | 0.333     | -0.202 | 0.223  |
| A011901_01 | -0.079    | -0.122 | 0.01      | -0.045    | 0.275  | 0.203 NA  | NA     |        |
| A011903_01 | 0.125     | -0.017 | 0.093     | -0.052    | 0.092  | -0.448    | 0.147  | -0.034 |
| A011910_01 | -0.291    | -0.259 | -0.454    | -0.174    | -0.47  | -0.346    | -0.062 | -0.001 |
| A011912_01 | -0.155    | 0.14   | -0.508    | -0.47     | -0.517 | -0.708    | 0.024  | 0.214  |
| A011915_01 | -0.487 NA |        | -0.158    | -0.228    | -0.421 | -0.373 NA | NA     |        |
| A011921_01 | 0.134 NA  |        | -0.169    | 0.106 NA  |        | 0.04 NA   | NA     |        |
| A011932_01 | -0.582    | -0.361 | -2.083    | -1.78     | -1.698 | -1.708    | -0.692 | -0.693 |
| A011935_01 | 0.304 NA  |        | -0.006    | 0.116     | -0.579 | -0.818 NA |        | -0.185 |
| A011936_01 | NA        | NA     | 0.045     | 0.012 NA  |        | -0.285    | 0.036  | -0.229 |
| A011941_01 | -0.276    | -0.034 | -0.46 NA  |           | -0.316 | -0.073 NA | NA     |        |
| A011942_01 | 0.162     | 0.22   | 0.184     | 0.005     | -0.062 | 0.012     | 0.018  | 0.266  |
| A011946_01 | 0.169     | 0.158  | -0.01     | -0.066    | -0.023 | -0.141    | -0.028 | 0.186  |
| A011949_01 | -0.184    | -0.037 | 0.107     | -0.025    | -1.109 | -1.444    | -0.285 | -0.257 |
| A011950_01 | 0.123     | -0.034 | 0.071     | -0.106    | 0.182  | 0.087 NA  |        | -0.012 |
| A011957_01 | 0.155     | 0.268  | -0.003    | -0.064    | -0.187 | -0.305    | 0.016  | 0.077  |
| A011963_01 | -0.017    | -0.119 | 1.154     | 0.862     | 1.337  | 1.562     | 0.114  | 0.29   |
| A011965_01 | -0.077    | -0.032 | -0.205    | -0.459    | -0.047 | 0.135 NA  |        | 0.502  |
| A011966_01 | 0.161     | -0.001 | 0.156     | 0.217     | 0.122  | 0.241     | 0.114  | 0.053  |
| A011967_01 | 0.097     | 0.001  | -0.105    | -0.093    | -0.133 | -0.287    | 0.074  | 0.114  |
| A011976_01 | 0.488     | -0.017 | 0.05      | -0.018    | 0.716  | 0.765     | 0.16   | -0.152 |
| A011977_01 | 0.121     | 0.132  | -0.24     | -0.303    | 0.105  | -0.042    | 0.081  | 0.136  |
| A011978_01 | 0.173     | -0.331 | -0.253    | -0.3      | -0.315 | -0.221    | 0.022  | -0.015 |
| A011985_01 | 0.351 NA  |        | -0.016    | -0.154    | 0.147  | -0.074    | 0.129  | 0.07   |
| A011986_01 | -0.209    | -0.316 | -0.304    | -0.11     | -0.874 | -0.895    | 0.045  | -0.046 |
| A011988_01 | 0.078     | 0.088  | 0.185     | 0.107     | -0.536 | -0.748    | -0.051 | -0.194 |
| A011992_01 | 0.154     | 0.095  | 0.083     | 0.233     | 0.005  | 0.321     | -0.084 | 0.176  |
| A011995_01 | 0.122     | 0.506  | -0.045    | -0.068    | -0.505 | -0.637    | -0.353 | 0.006  |
| A011996_01 | 0.343     | 0.214  | 0.132     | -0.058    | 0.394  | 0.286     | 0.306  | 0.357  |
| A012001_01 | 0.189     | 0.219  | -0.21     | -0.326    | 0.313  | 0.501     | 0.186  | 0.113  |
| A012008_01 | -0.259 NA |        | 0.088     | -0.215    | -0.096 | -0.244 NA |        | -0.124 |



|            |    |           |        |           |          |        |           |           |        |
|------------|----|-----------|--------|-----------|----------|--------|-----------|-----------|--------|
| A012009_01 |    | 0.093     | -0.284 | -0.199    | -0.121   | -0.046 | -0.17     | 0.185     | -0.113 |
| A012010_01 |    | 0.051     | 0.323  | 0.025     | 0.008    | -0.232 | -0.149    | -0.382    | -0.105 |
| A012011_01 |    | 0.112     | 0.07   | -0.291    | -0.238   | -0.176 | -0.263    | 0.147     | 0      |
| A012012_01 |    | 0.407     | 0.314  | 0.171     | -0.022   | -0.131 | -0.087    | -0.097    | -0.06  |
| A012013_01 | NA | NA        |        | 0.041     | 0.024 NA |        | -0.542    | 0.457     | 0.1    |
| A012014_01 |    | 0.04      | 0.083  | 0.019     | -0.09    | -0.056 | -0.081    | -0.223    | -0.208 |
| A012021_01 |    | -0.086    | -0.071 | -0.017    | -0.084   | 0.164  | 0.246     | 0.093     | 0.182  |
| A012028_01 |    | 0.107     | -0.003 | 0.458     | 0.643    | -0.045 | -0.1      | -0.912    | -0.964 |
| A012030_01 |    | 0.412     | 0.451  | -0.487    | -0.227   | 0.464  | 0.767     | -0.082    | 0.13   |
| A012031_01 |    | 0.244 NA  |        | 0.703     | 0.689 NA |        | -0.196    | -0.388    | -0.557 |
| A012033_01 |    | 0.07      | -0.278 | -0.094    | -0.153   | 0.083  | -0.083    | 0.133     | -0.047 |
| A012039_01 |    | -0.293    | -0.387 | -0.153    | -0.044   | -1.201 | -1.564    | -0.282    | -0.439 |
| A012043_01 |    | -0.01 NA  |        | -0.287    | -0.335   | -0.194 | -0.268 NA |           | -0.014 |
| A012046_01 |    | 0.118 NA  |        | -0.064    | -0.078   | 0.121  | 0.11 NA   |           | 0.025  |
| A012049_01 |    | -0.497    | -0.456 | -0.427    | -0.527   | -0.113 | 0.074     | -0.531    | -0.421 |
| A012050_01 |    | -0.248 NA |        | -0.096    | -0.227   | -0.156 | -0.211    | 0.095     | 0.039  |
| A012060_01 |    | 0.012     | -0.106 | 0.066     | 0.272    | 0.037  | 0.004     | 0.04      | -0.15  |
| A012066_01 |    | 0.029     | 0.042  | -0.23     | -0.271   | 0.029  | 0.021     | 0.078     | 0.155  |
| A012068_01 |    | -0.135 NA | NA     |           | 0.021 NA |        | -0.259 NA | NA        |        |
| A012069_01 |    | -0.081    | -0.064 | 0.211     | 0.458    | -0.302 | -0.226    | -0.091    | -0.369 |
| A012075_01 |    | 0.072     | -0.052 | 0.261     | 0.284    | 0.253  | 0.153     | 0.094     | -0.152 |
| A012076_01 |    | 0.389     | 0.099  | 0.388     | 0.537    | 0.187  | 0.094     | 0.043     | -0.238 |
| A012078_01 |    | 0.131     | 0.046  | 0.069     | -0.044   | -0.04  | 0.036     | 0.079     | -0.089 |
| A012079_01 |    | 0.302     | 0.227  | 0.09      | 0.071    | -0.113 | -0.195    | 0.212     | 0.11   |
| A012080_01 |    | 0.128     | 0.086  | -0.331    | 0.057    | -0.293 | -0.347    | -1.349    | -1.296 |
| A012084_01 |    | -0.034    | -0.244 | -0.345    | -0.406   | 0.068  | 0.161     | -0.113    | -0.168 |
| A012085_01 |    | 0.336     | 0.033  | 0.139     | -0.05    | 0.599  | 0.447     | 0.056     | -0.19  |
| A012086_01 |    | -0.04     | -0.059 | -0.335    | -0.186   | -0.173 | -0.224    | 0.019     | -0.104 |
| A012088_01 |    | -0.099    | -0.054 | -0.194    | -0.091   | -0.064 | 0.009     | -0.172    | 0.025  |
| A012091_01 |    | 0.373     | 0.395  | -0.106    | -0.115   | 0.877  | 1.205     | 0.301     | 0.393  |
| A012092_01 |    | -0.129    | -0.018 | -0.171    | -0.281   | -0.263 | -0.217    | -0.025    | 0.107  |
| A012093_01 |    | -0.058    | -0.003 | -0.135    | -0.037   | -0.337 | -0.183    | -0.258    | -0.044 |
| A012098_01 |    | 0.239     | -0.067 | -0.107    | -0.416   | 0.062  | -0.183    | 0.078     | -0.15  |
| A012104_01 |    | 0.364     | 0.382  | 0.065     | 0.114    | 0.187  | 0.134     | 0.051     | 0.178  |
| A012108_01 |    | 0.125     | 0.024  | 0.098     | 0.123    | -0.109 | -0.257    | 0.101     | -0.039 |
| A012113_01 |    | 0.104     | 0.275  | -0.118    | -0.291   | 0.361  | 0.737     | 0.006     | 0.294  |
| A012115_01 |    | -0.757    | -0.507 | -0.272    | -0.148   | -0.598 | -0.616    | 0.099     | 0.049  |
| A012116_01 |    | -1.053    | -1.121 | -0.894    | -0.879   | 0.157  | 0.482 NA  |           | -0.434 |
| A012117_01 |    | 0.059     | -0.05  | -0.099    | -0.106   | 0.371  | 0.434     | 0.2       | 0.181  |
| A012119_01 |    | -0.579    | -0.373 | -0.194    | -0.236   | 0.119  | 0.335     | -0.556    | -0.564 |
| A012120_01 |    | 0.168 NA  |        | 0.222     | 0.216    | -0.032 | -0.175 NA |           | -0.386 |
| A012123_01 |    | 0.861     | 0.285  | 0.047     | 0.102    | 0.568  | 0.236     | 0.369     | 0.121  |
| A012125_01 | NA | NA        |        | 0.112     | 0.084 NA |        | -0.476    | 0.031     | -0.094 |
| A012126_01 |    | 0.222 NA  |        | -0.096    | 0.056    | 0.389  | 0.419     | 0.258     | 0.078  |
| A012127_01 |    | 0.322 NA  |        | 0.197     | -0.004   | 0.211  | 0.139     | -0.021    | 0.093  |
| A012129_01 |    | 0.314     | 0.05   | -0.014    | -0.033   | 0.234  | 0.222     | 0.181     | 0.085  |
| A012130_01 |    | -0.181    | -0.261 | -0.04     | 0.053    | -0.367 | -0.009    | -0.064    | 0.008  |
| A012131_01 |    | -0.361    | -0.127 | -0.156    | -0.014   | -1.013 | -0.825    | -0.469    | -0.316 |
| A012132_01 |    | 0.179     | -0.195 | -0.048    | -0.237   | -0.28  | -0.599 NA |           | -0.127 |
| A012134_01 |    | 0.478     | 0.156  | 0.11      | 0.084    | 0.168  | 0.082 NA  |           | -0.195 |
| A012141_01 |    | -0.036    | -0.057 | 0.058     | -0.237   | 0.318  | 0.228     | 0.18      | 0.062  |
| A012144_01 |    | 0.292     | 0.216  | -0.028    | -0.049   | 0.137  | 0.038     | 0.134     | -0.03  |
| A012145_01 |    | 0.164     | 0.178  | 0.101     | -0.201   | 0.32   | 0.081     | 0.01      | -0.038 |
| A012149_01 |    | 0.042     | 0.158  | -0.281    | -0.317   | 0.166  | 0.311     | -0.072    | 0.166  |
| A012150_01 |    | -0.152    | 0.058  | 0.014     | 0.003    | 0.292  | -0.057    | 0.12      | -0.004 |
| A012155_01 |    | 0.201     | 0.103  | 0.197     | 0.434    | -0.287 | -0.382    | -0.23     | -0.413 |
| A012158_01 |    | -0.103 NA |        | -0.006    | 0.08     | -0.095 | -0.111    | 0.168     | 0.147  |
| A012159_01 |    | 0.189     | 0.298  | 0.281     | 0.309    | -0.819 | -0.835    | 0.47      | 0.481  |
| A012163_01 |    | -0.342    | -0.476 | -0.338 NA |          | 0.331  | 0.694 NA  | NA        |        |
| A012167_01 |    | -0.196    | -0.181 | 0.053     | 0.109    | -0.471 | -0.408    | 0.002     | -0.07  |
| A012168_01 |    | 0.125     | 0.277  | -0.143    | -0.045   | 0.235  | 0.297 NA  | NA        |        |
| A012171_01 |    | -0.015    | -0.143 | -0.1      | 0.099    | 0.045  | 0.32      | -0.077 NA |        |
| A012174_01 |    | 0.121     | -0.069 | -0.322    | -0.206   | -0.077 | -0.056    | 0.195     | 0.011  |
| A012175_01 |    | -0.158    | -0.13  | -0.224    | -0.14    | 0.086  | 0.295     | 0.317     | 0.431  |
| A012176_01 |    | 0.149     | 0.141  | -0.277    | -0.14    | 0.2    | 0.282     | 0.411     | 0.294  |
| A012178_01 |    | 0.36      | 0.481  | 0.142     | 0.094    | 0.129  | -0.067    | 0.019     | 0.129  |
| A012184_01 |    | -0.361    | -0.285 | -0.405    | -0.652   | 0.265  | 0.526 NA  |           | 0.073  |
| A012185_01 |    | 0.05      | -0.097 | 0.536     | 0.24     | -0.087 | -0.296    | -0.385    | -0.538 |

|            |        |        |        |        |        |        |        |        |
|------------|--------|--------|--------|--------|--------|--------|--------|--------|
| A012186_01 | 0.337  | 0.166  | -0.045 | -0.157 | 0.408  | 0.456  | 0.008  | 0.138  |
| A012193_01 | 0.197  | -0.063 | -0.401 | -0.327 | -0.005 | 0.097  | 0.287  | 0.276  |
| A012200_01 | -0.783 | -0.788 | 0.058  | 0.082  | -0.157 | -0.035 | 0.208  | 0.16   |
| A012203_01 | -0.436 | -0.435 | -0.051 | 0.046  | -0.426 | -0.405 | 0.245  | 0.147  |
| A012207_01 | 0.475  | 0.139  | 0.276  | 0.027  | -0.207 | -0.57  | 0.051  | -0.415 |
| A012210_01 | 0.39   | 0.134  | 0.024  | -0.043 | 0.052  | -0.148 | 0.141  | -0.039 |
| A012213_01 | -0.316 | -0.213 | 0.061  | 0.316  | -0.499 | -0.397 | -0.202 | -0.01  |
| A012214_01 | -0.131 | 0.122  | 0.039  | 0.108  | 0.413  | 0.614  | 0.027  | -0.011 |
| A012215_01 | 0.153  | -0.118 | 0.059  | -0.038 | 0.388  | 0.508  | 0.319  | 0.23   |
| A012218_01 | 0.211  | 0.131  | 0.145  | 0.087  | -0.233 | -0.168 | -0.104 | -0.03  |
| A012219_01 | 0.108  | -0.101 | -0.318 | -0.27  | 0.144  | 0.099  | -0.002 | NA     |
| A012221_01 | -0.192 | -0.036 | -0.247 | -0.27  | -0.143 | -0.192 | 0.116  | 0.005  |
| A012223_01 | -0.299 | NA     | 0.2    | -0.012 | NA     | -0.207 | NA     | NA     |
| A012229_01 | 0.032  | NA     | 0.079  | -0.138 | NA     | -0.615 | -0.023 | 0.049  |
| A012231_01 | -0.004 | NA     | NA     | -0.386 | NA     | 0.117  | NA     | 0.064  |
| A012234_01 | 0.207  | -0.004 | 0.012  | -0.114 | 0.127  | 0.101  | -0.078 | -0.206 |
| A012237_01 | -0.284 | -0.302 | -0.433 | -0.124 | -0.149 | 0.09   | 0.09   | -0.039 |
| A012239_01 | -0.263 | NA     | -0.256 | NA     | -0.011 | 0.021  | NA     | NA     |
| A012247_01 | -0.377 | -0.028 | -0.002 | 0.099  | -0.142 | -0.205 | -0.176 | -0.093 |
| A012251_01 | -0.416 | -0.508 | -0.004 | -0.089 | -0.541 | -0.294 | -0.43  | -0.334 |
| A012254_01 | 0.043  | 0.184  | 0.12   | -0.148 | 0.27   | 0.205  | 0.235  | 0.295  |
| A012256_01 | -0.217 | -0.077 | -1.235 | -1.145 | -0.306 | 0.124  | -0.624 | -0.267 |
| A012257_01 | -1.761 | -1.198 | 0.659  | 0.715  | 1.44   | 2.166  | 0.624  | 0.576  |
| A012259_01 | -1.314 | -1.292 | -0.002 | -0.245 | -1.417 | -1.528 | NA     | NA     |
| A012264_01 | -0.308 | -0.595 | NA     | -0.225 | -0.092 | -0.103 | NA     | 0.021  |
| A012272_01 | -0.005 | 0.237  | -0.226 | -0.112 | -0.031 | 0.066  | -0.178 | 0.028  |
| A012275_01 | -0.188 | -0.1   | 0.32   | 0.548  | 0.059  | 0.34   | -0.219 | -0.307 |
| A012276_01 | -0.069 | 0.134  | -0.319 | -0.47  | 0.137  | -0.034 | 0.041  | 0.059  |
| A012277_01 | 0.558  | 0.45   | -0.334 | -0.525 | -1.172 | -1.651 | 0.355  | 0.179  |
| A012283_01 | 0.136  | 0.181  | -0.097 | -0.24  | 0.623  | 0.619  | 0.391  | 0.65   |
| A012291_01 | 0.375  | 0.016  | -0.111 | -0.041 | 0.061  | 0.167  | 0.032  | -0.005 |
| A012293_01 | 0.111  | 0.204  | -0.366 | -0.352 | -0.118 | 0.175  | -0.029 | 0.116  |
| A012294_01 | 0.095  | 0.127  | -0.22  | -0.189 | -0.064 | 0.136  | -0.28  | -0.181 |
| A012295_01 | -0.015 | -0.106 | 0.016  | -0.051 | -0.02  | -0.068 | 0.022  | -0.021 |
| A012299_01 | 0.024  | -0.036 | 0.014  | -0.149 | 0.355  | 0.333  | 0.208  | 0.105  |
| A012309_01 | -0.266 | -0.203 | -0.139 | -0.127 | NA     | -0.842 | -0.248 | -0.332 |
| A012311_01 | -0.083 | -0.103 | 0.008  | -0.062 | -0.707 | -0.843 | -0.388 | -0.475 |
| A012313_01 | -0.068 | -0.386 | -0.021 | 0.037  | 0.211  | 0.23   | -0.232 | -0.199 |
| A012321_01 | 0.224  | NA     | NA     | 0.225  | NA     | NA     | -0.041 | 0.035  |
| A012323_01 | -0.067 | NA     | 0.029  | 0.014  | 0.004  | 0.138  | 0.176  | 0.266  |
| A012324_01 | -0.227 | -0.173 | -0.093 | -0.177 | -1.295 | -1.361 | -0.674 | -0.683 |
| A012325_01 | 0.299  | 0.372  | 0.176  | 0.172  | 0.068  | 0.112  | -0.205 | -0.221 |
| A012326_01 | 0.12   | -0.025 | -0.284 | -0.211 | 0.045  | 0.193  | 0.033  | 0.05   |
| A012331_01 | -0.259 | -0.472 | -0.283 | -0.242 | -2.559 | -3.062 | -1.39  | -1.527 |
| A012332_01 | 0.189  | 0.056  | -0.039 | 0.167  | -0.536 | -0.578 | 0.354  | 0.353  |
| A012334_01 | -0.346 | -0.231 | -0.02  | -0.016 | -0.504 | -0.753 | 0.176  | 0.021  |
| A012336_01 | -0.455 | -0.329 | -0.34  | -0.42  | -0.752 | -0.725 | -0.661 | -0.45  |
| A012337_01 | -0.13  | 0.001  | -0.202 | -0.154 | -0.09  | -0.001 | 0.081  | 0.461  |
| A012340_01 | 0.371  | 0.076  | -0.014 | 0.19   | -0.026 | -0.201 | NA     | -0.143 |
| A012341_01 | -0.088 | NA     | 0.27   | 0.049  | -0.472 | -0.618 | NA     | NA     |
| A012351_01 | 0.167  | 0.068  | 0.089  | -0.072 | -0.412 | -0.547 | NA     | 0.189  |
| A012353_01 | -0.124 | -0.034 | 0.139  | 0.118  | -0.151 | -0.215 | -0.12  | -0.037 |
| A012354_01 | 0.053  | 0.11   | 0.407  | 0.18   | 0.226  | 0.211  | -0.36  | -0.314 |
| A012357_01 | 0.125  | 0.048  | -0.148 | -0.279 | 0.063  | 0.184  | -0.044 | 0.045  |
| A012360_01 | 0.162  | 0.145  | 0.244  | 0.177  | 0.394  | 0.615  | 0.004  | -0.049 |
| A012364_01 | -0.208 | 0.211  | 0.004  | -0.038 | -0.032 | 0.277  | 0.037  | 0.709  |
| A012366_01 | 0.24   | NA     | -0.027 | NA     | NA     | 0.142  | NA     | NA     |
| A012367_01 | -0.014 | 0.268  | 0.079  | 0.029  | -0.004 | 0.159  | -0.126 | 0.139  |
| A012369_01 | -0.469 | NA     | -0.7   | NA     | NA     | NA     | NA     | 0.123  |
| A012370_01 | 0.223  | 0.093  | -0.149 | -0.169 | 0.476  | 0.508  | 0.05   | 0.093  |
| A012371_01 | -0.437 | -0.312 | -0.029 | -0.04  | -0.433 | -0.67  | -0.066 | -0.168 |
| A012372_01 | 0.609  | 0.456  | 0.465  | 0.533  | -0.554 | -0.984 | -0.449 | -0.694 |
| A012373_01 | 0.042  | 0.257  | 0.033  | 0.165  | 0.32   | 0.463  | 0.361  | 0.488  |
| A012375_01 | 0.229  | 0.16   | 0.097  | 0.007  | 0.38   | 0.35   | 0.066  | 0.082  |
| A012377_01 | 0.374  | NA     | 0.149  | NA     | 0.337  | 0.303  | NA     | NA     |
| A012379_01 | 0.404  | 0.163  | -0.099 | -0.097 | 0.42   | 0.473  | 0.143  | 0.118  |
| A012381_01 | 0.191  | 0.045  | -0.043 | -0.094 | 0.186  | 0.195  | 0.111  | 0.059  |
| A012382_01 | -0.172 | NA     | 0.159  | -0.012 | -0.546 | -0.789 | -0.19  | -0.335 |

|            |    |           |           |           |           |        |           |        |        |
|------------|----|-----------|-----------|-----------|-----------|--------|-----------|--------|--------|
| A012385_01 |    | 0.033     | -0.09     | -0.172    | -0.029    | 0.305  | 0.36      | 0.067  | 0.031  |
| A012386_01 |    | 0.039     | -0.201    | 0.692     | 0.878     | 0.355  | 0.601 NA  |        | -0.172 |
| A012388_01 |    | -0.271    | -0.261    | -0.002    | 0.028     | -0.034 | 0.147     | 0.109  | 0.223  |
| A012390_01 |    | -0.308    | -0.319    | -0.027 NA |           | 0.084  | 0.093 NA  | NA     |        |
| A012393_01 |    | -0.143    | 0.031     | 0.24      | 0.18      | -0.194 | -0.081    | -0.209 | -0.038 |
| A012396_01 |    | 0.149     | 0.107     | -0.218    | -0.077    | -0.484 | -0.668    | -0.097 | -0.085 |
| A012397_01 |    | 0.346     | 0.451     | 0.005     | 0.09      | -0.25  | -0.552    | 0.02   | -0.077 |
| A012398_01 |    | -0.021    | 0.073     | -0.335    | -0.392    | 0.469  | 0.57      | 0.139  | 0.27   |
| A012400_01 |    | 0.271     | 0.216     | 0.088     | -0.015    | 0.393  | 0.281     | -0.021 | -0.151 |
| A012402_01 |    | 0.058     | -0.009    | 0.041     | -0.05     | 0.205  | 0.016     | 0.022  | -0.01  |
| A012404_01 | NA |           | -0.079    | -0.025    | -0.054    | 0.278  | 0.287     | 0.146  | 0.112  |
| A012407_01 |    | 0.232     | 0.168     | 0.072     | -0.044    | 0.327  | 0.206     | 0.09   | -0.085 |
| A012410_01 |    | 0.003 NA  |           | -0.217    | -0.162 NA |        | -0.075 NA |        | 0.149  |
| A012415_01 |    | -0.552    | -0.876    | -0.659    | -0.434    | 0.583  | 1.1       | 0.378  | 0.37   |
| A012421_01 |    | 0.057     | 0.062     | -0.079    | -0.119    | 0.125  | 0.21      | 0.022  | 0.113  |
| A012422_01 |    | -0.314    | -0.012    | 0.205     | -0.11     | -0.603 | -0.714    | -0.085 | 0.095  |
| A012423_01 |    | 0.331     | 0.079     | 0.109     | 0.176     | 0.141  | 0.031     | 0.203  | 0.121  |
| A012425_01 |    | 0.252     | 0.01      | 0.004     | -0.013    | 0.241  | 0.068     | 0.533  | 0.3    |
| A012428_01 |    | -0.209    | -0.243    | -0.228    | -0.323    | 0.101  | 0.096     | 0.164  | 0.149  |
| A012429_01 |    | -1.851    | -1.749 NA |           | -1.353 NA |        | -2.746 NA |        | -1.432 |
| A012430_01 |    | 0.473     | 0.413     | -0.192    | -0.468    | -0.31  | -0.284    | 0.794  | 0.963  |
| A012440_01 |    | 0.258 NA  |           | -0.098    | -0.063 NA |        | 0.152     | 0.315  | 0.171  |
| A012442_01 |    | -0.078    | -0.025    | -0.167    | -0.112    | 0.912  | 1.227     | -0.053 | -0.074 |
| A012445_01 |    | 0.194     | 0.311     | 0.11      | -0.006    | 0.064  | 0.211     | 0.123  | 0.078  |
| A012449_01 |    | 0.105 NA  |           | 0.418     | 0.262     | -0.943 | -1.11     | -0.338 | -0.271 |
| A012451_01 |    | 0.221     | -0.167    | 0.144     | -0.006    | 0.008  | -0.072 NA |        | -0.148 |
| A012454_01 |    | -0.534    | -0.819    | -0.411    | -0.56     | -0.894 | -1.128    | -0.506 | -0.564 |
| A012458_01 |    | -0.413    | -0.232    | -0.033    | -0.066    | -0.443 | -0.134    | -0.963 | -0.45  |
| A012460_01 |    | -0.059 NA |           | 0.112     | 0.062 NA  |        | -0.332    | 0.196  | -0.158 |
| A012464_01 |    | -0.165    | -0.145    | 0.127     | 0.208     | 0.112  | 0.324     | -0.304 | -0.117 |
| A012466_01 |    | 0.151 NA  |           | 0.177     | -0.014 NA |        | -0.269    | -0.033 | -0.106 |
| A012467_01 |    | -0.085    | -0.13     | 0.594     | 0.551     | 1.252  | 1.507     | 0.372  | 0.4    |
| A012468_01 |    | -0.27     | -0.159    | 0.297     | 0.014     | 0.261  | 0.298     | -0.014 | -0.07  |
| A012469_01 |    | 0.194 NA  |           | 0.289     | 0.491     | 0.049  | 0.182 NA  |        | -0.121 |
| A012473_01 |    | 0.072 NA  |           | 0.156     | 0.043 NA  | NA     |           | 0.097  | 0.119  |
| A012479_01 |    | 0.315     | 0.127     | 0.172     | 0.37      | -0.707 | -0.828 NA | NA     |        |
| A012482_01 |    | -0.127    | -0.026    | -0.388    | -0.528    | -0.024 | 0.056     | 0.246  | 0.247  |
| A012487_01 |    | -0.446    | -0.609    | 0.644     | 0.451     | 1.049  | 1.175     | 0.346  | 0.382  |
| A012493_01 |    | -0.185 NA |           | -0.121 NA |           | -0.443 | -0.418 NA |        | -0.226 |
| A012499_01 |    | 0.102     | -0.212    | -0.039    | -0.077    | -0.114 | -0.252    | 0.075  | -0.152 |
| A012501_01 |    | 0.213     | -0.121    | 0.19      | 0.05      | 0.066  | 0.053     | -0.071 | -0.028 |
| A012502_01 |    | 0.445     | 0.305     | -0.01     | -0.153    | 0.446  | 0.419     | 0.184  | 0.225  |
| A012504_01 |    | -0.004    | -0.27     | 0.063     | -0.085    | 0.146  | 0.096 NA  | NA     |        |
| A012513_01 |    | 0.141     | 0.168     | -0.116    | 0.027     | 0.389  | 0.504     | 0.091  | 0.129  |
| A012518_01 |    | 0.33      | 0.213     | 0.082     | 0.045     | 0.134  | 0.176     | 0.078  | 0.11   |
| A012526_01 |    | 0.306 NA  |           | 0.266     | 0.205     | -0.365 | -0.546 NA |        | -0.247 |
| A012527_01 |    | -0.013 NA |           | -0.031    | -0.024 NA |        | -0.192    | 0.22   | 0.086  |
| A012532_01 |    | -0.107    | -0.131    | -0.232    | -0.095    | -0.108 | -0.148    | 0.101  | 0.131  |
| A012533_01 |    | 0.294     | 0.171     | 0.092     | 0.02      | -0.071 | -0.186 NA | NA     |        |
| A012537_01 |    | 0.154     | 0.025     | -0.097    | -0.098    | 0.036  | -0.062    | 0.114  | -0.071 |
| A012543_01 |    | -0.035    | -0.043    | -0.552    | -0.448    | 0.352  | 0.504 NA  | NA     |        |
| A012557_01 |    | 0.12      | 0.227     | 0.012     | 0.084     | -0.061 | -0.062    | -0.297 | -0.225 |
| A012562_01 |    | 0.115     | 0.08      | -0.328    | -0.564    | 0.106  | 0.242 NA  |        | 0.251  |
| A012563_01 |    | 0.627     | 0.119     | 0.144     | -0.009    | 0.892  | 0.268     | 0.111  | 0.432  |
| A012565_01 |    | -0.232    | -0.08     | 0.123     | -0.115    | -0.074 | -0.053    | -0.087 | 0.139  |
| A012566_01 |    | -0.1      | 0.04      | 0.081     | 0.152     | 0.067  | 0.157     | -0.228 | -0.084 |
| A012567_01 |    | 0.057     | 0.1       | 0.162     | 0.136     | -0.212 | -0.32     | 0.052  | -0.001 |
| A012572_01 |    | -0.454    | 0         | -0.183    | -0.089    | 0.282  | 0.506     | 0.158  | 0.418  |
| A012577_01 |    | -0.119 NA | NA        | NA        |           | 0.423  | 0.784 NA  | NA     |        |
| A012578_01 |    | -1.031    | -0.853    | -0.137    | -0.06     | -0.955 | -0.974    | -0.025 | 0.125  |
| A012579_01 |    | 0.206 NA  |           | 0.364     | 0.383     | 0.636  | 0.796     | 0.225  | 0.315  |
| A012580_01 |    | -0.09     | -0.141    | -0.171    | -0.265    | -0.215 | -0.12     | 0.015  | 0.315  |
| A012581_01 |    | -0.853    | -0.998 NA |           | -1.324    | -1.734 | -2.049 NA | NA     |        |
| A012585_01 |    | 0.009     | -0.292    | -0.031    | -0.399    | -0.435 | -0.633    | -0.127 | -0.262 |
| A012587_01 |    | -0.021    | -0.262    | -0.221    | -0.086    | -0.261 | -0.085    | 0.149  | 0.079  |
| A012590_01 |    | -0.18     | 0.081     | 0.037     | 0.07      | -0.865 | -0.978    | -0.601 | -0.486 |
| A012591_01 |    | -0.098    | -0.172    | -0.102    | -0.32     | -0.02  | -0.175    | -0.014 | -0.143 |
| A012594_01 |    | -0.03 NA  |           | -0.183 NA |           | 0.333  | 0.36 NA   | NA     |        |

|            |           |        |        |           |        |           |        |        |
|------------|-----------|--------|--------|-----------|--------|-----------|--------|--------|
| A012595_01 | 0.277     | 0.168  | -0.197 | -0.069    | 0.26   | 0.281 NA  |        | 0.278  |
| A012597_01 | -0.076    | 0.123  | -0.276 | -0.354    | -0.02  | 0.178     | -0.048 | 0.184  |
| A012604_01 | -0.194    | -0.306 | -0.071 | -0.059    | -0.11  | -0.213    | -0.068 | -0.176 |
| A012607_01 | -0.289 NA |        | 0.654  | 0.641     | 0.979  | 1.267     | 0.225  | 0.281  |
| A012618_01 | -0.056    | -0.076 | 0.203  | 0.172     | 0.453  | 0.484     | 0.068  | -0.113 |
| A012621_01 | 0.017     | -0.229 | 0.076  | -0.036    | 0.308  | 0.347 NA  | NA     |        |
| A012623_01 | -0.057    | 0.095  | 0.045  | -0.145    | 0.003  | 0.03      | -0.136 | 0.002  |
| A012625_01 | -0.17     | -0.091 | 0.103  | 0.102     | -0.236 | -0.253    | -0.011 | 0.007  |
| A012626_01 | 0.135 NA  |        | -0.094 | -0.04 NA  |        | 0.441     | 0.237  | 0.137  |
| A012627_01 | 0.216     | -0.088 | 0.196  | 0.049     | 0.493  | 0.437     | 0.267  | -0.024 |
| A012628_01 | 0.13 NA   |        | 0.406  | 0.275     | 1.012  | 1.3       | 0.594  | 0.562  |
| A012631_01 | -0.069 NA | NA     | NA     |           | 0.141  | 0.237 NA  |        | 0.193  |
| A012633_01 | 0.201     | 0.189  | 0.157  | 0.008     | -0.57  | -0.918 NA |        | -0.28  |
| A012637_01 | 0.149     | 0.119  | 0.248  | 0.04      | 0.277  | 0.228     | -0.066 | -0.013 |
| A012640_01 | 0.035     | 0.034  | 0.159  | 0.093     | -0.713 | -0.62 NA  | NA     |        |
| A012641_01 | -0.492    | -0.533 | 0.131  | 0.049     | -0.71  | -0.692    | -0.145 | -0.157 |
| A012646_01 | 0.197     | 0.313  | 0.523  | 0.35      | 0.199  | 0.273     | -0.481 | -0.382 |
| A012647_01 | -0.342 NA |        | 0.613  | 0.109 NA  |        | -0.715    | -0.409 | -0.391 |
| A012648_01 | 0.13      | 0.152  | -0.084 | -0.083    | 0.051  | 0.057     | 0.01   | 0.234  |
| A012649_01 | -0.314    | -0.183 | 0.412  | 0.359     | -0.014 | 0.131 NA  |        | 0.018  |
| A012650_01 | 0.168     | -0.036 | -0.037 | -0.04     | -0.082 | -0.128    | 0.037  | 0.105  |
| A012651_01 | -0.208    | -0.1   | -0.062 | -0.18     | 0.223  | 0.306     | 0.103  | 0.087  |
| A012653_01 | 0.201     | -0.107 | 0.063  | 0.112     | -0.14  | -0.367    | 0.056  | -0.061 |
| A012654_01 | -0.577    | -0.584 | -0.023 | -0.102    | -1.478 | -1.797    | -0.436 | -0.302 |
| A012655_01 | 0.185     | 0.243  | 0.106  | 0.054     | 0.189  | 0.051     | 0.282  | 0.263  |
| A012657_01 | 0.124     | -0.062 | -0.25  | 0.063     | -0.132 | 0.163 NA  |        | -0.469 |
| A012660_01 | -0.415 NA |        | -0.003 | 0.136     | 0.095  | -0.116 NA | NA     |        |
| A012664_01 | -0.03     | 0.132  | -0.104 | -0.105    | 0.164  | 0.267     | 0.168  | 0.214  |
| A012665_01 | 0.029 NA  |        | -0.227 | -0.263 NA |        | 0.202 NA  |        | 0.122  |
| A012672_01 | 0.062     | 0.363  | 0.085  | 0.069     | 0.297  | 0.61      | -0.13  | 0.086  |
| A012678_01 | -0.277    | -0.295 | -0.552 | -0.443    | 0.598  | 0.823     | 0.028  | -0.072 |
| A012680_01 | -0.058 NA |        | -0.032 | -0.054 NA | NA     |           | -0.038 | 0.148  |
| A012685_01 | 0.226     | 0.055  | -0.111 | 0.12      | 0.065  | 0.218     | 0.1    | 0.028  |
| A012694_01 | 0.084     | 0.241  | -0.248 | -0.4      | 0.162  | -0.017    | 0.345  | 0.352  |
| A012695_01 | 0.685     | 0.369  | 0.036  | 0.036     | 0.096  | -0.001    | -0.059 | -0.211 |
| A012696_01 | 0.036     | -0.006 | -0.561 | -0.332    | -0.31  | -0.544    | 0.071  | 0.003  |
| A012697_01 | 0.07      | 0.019  | -0.322 | -0.131    | 0.07   | 0.129     | 0.051  | 0.038  |
| A012700_01 | -0.598    | -0.685 | -0.028 | -0.017    | -0.969 | -0.974    | -0.423 | -0.264 |
| A012704_01 | 0.471     | 0.355  | 0.17   | -0.048    | -0.065 | -0.154    | 0.249  | 0.203  |
| A012705_01 | 0.22 NA   |        | -0.214 | -0.045 NA |        | -0.161    | 0.157  | -0.051 |
| A012706_01 | 0.011     | -0.187 | -0.092 | -0.201    | 0.039  | -0.1      | 0.066  | -0.086 |
| A012707_01 | -0.024    | -0.111 | -0.013 | 0.122     | 0.65   | 0.78      | 0.424  | 0.153  |
| A012710_01 | -0.143    | 0.093  | -0.177 | -0.168    | 0.237  | 0.221     | -0.018 | 0.137  |
| A012712_01 | NA        | NA     | -0.002 | -0.248 NA |        | -0.48     | 0.192  | 0.13   |
| A012714_01 | 0.207     | 0.049  | 0.016  | -0.17     | 0.273  | 0.276     | 0.055  | 0.01   |
| A012715_01 | 0.111 NA  |        | -0.089 | 0.077 NA  |        | 0.204 NA  | NA     |        |
| A012722_01 | 0.187 NA  |        | -0.15  | -0.158    | 0.42   | 0.391     | 0.37   | 0.315  |
| A012723_01 | -0.039    | -0.123 | 0.063  | -0.154    | 0.296  | 0.396     | 0.097  | 0.051  |
| A012724_01 | -0.027    | -0.097 | 0.463  | 0.394     | 0.57   | 0.701 NA  | NA     |        |
| A012726_01 | 0.141     | -0.148 | 0.174  | -0.128    | 0.092  | -0.179    | 0.04   | -0.186 |
| A012728_01 | 0.222     | 0.257  | 0.284  | 0.4       | 0.222  | 0.068     | 0.065  | -0.11  |
| A012730_01 | 0.091     | 0.094  | 0.419  | 0.386     | -0.23  | -0.414    | -0.031 | -0.095 |
| A012732_01 | -0.308    | 0.053  | -0.64  | -0.387    | -0.499 | -0.111    | -0.308 | -0.01  |
| A012738_01 | 0.246     | 0.119  | -0.189 | -0.056    | 0.209  | 0.284     | -0.04  | 0.122  |
| A012739_01 | 0.104     | 0.257  | -0.03  | -0.044    | -0.695 | -0.951    | -0.001 | 0.029  |
| A012741_01 | 0.144     | 0.123  | 0.118  | -0.024    | 0.417  | 0.464     | 0.168  | 0.272  |
| A012745_01 | 0.293     | 0.284  | 0.114  | 0.099     | 0.193  | 0.124     | -0.036 | 0.036  |
| A012747_01 | 0.029     | 0.384  | -0.271 | -0.273    | -0.657 | -1.064    | -0.15  | -0.259 |
| A012748_01 | -0.835    | -0.621 | -1.248 | -1.217    | -2.651 | -3.049 NA |        | -1.761 |
| A012749_01 | 0.399     | 0.305  | -0.197 | -0.072    | 0.59   | 0.752     | 0.173  | 0.247  |
| A012752_01 | -0.532    | -0.75  | 0.221  | 0.255     | -0.68  | -0.705    | -0.019 | 0.145  |
| A012754_01 | 0.546     | 0.689  | -0.265 | -0.265    | 0.303  | 0.296     | -0.36  | -0.096 |
| A012758_01 | 0.423     | 0.206  | 0.178  | 0.105     | 0.24   | 0.093     | 0.003  | -0.036 |
| A012760_01 | -0.347    | -0.057 | 0.022  | -0.109    | 0.042  | 0.092     | -0.129 | 0.114  |
| A012762_01 | -0.2 NA   |        | -0.013 | -0.058    | 0.195  | 0.295 NA  | NA     |        |
| A012767_01 | 0.416     | 0.296  | 0.202  | -0.131    | 0.574  | 0.567 NA  |        | 0.088  |
| A012768_01 | -0.14     | -0.082 | -0.035 | -0.087    | 0.063  | 0.127     | 0.072  | -0.018 |
| A012769_01 | 0.038     | 0.105  | 0.347  | 0.18      | -0.257 | -0.328    | -0.566 | -0.184 |

|            |           |           |           |           |        |           |        |        |
|------------|-----------|-----------|-----------|-----------|--------|-----------|--------|--------|
| A012770_01 | 0.418 NA  |           | 0.756     | 0.604 NA  |        | 0.48      | -0.099 | -0.167 |
| A012771_01 | -0.159    | -0.104    | -0.228    | -0.252    | -0.241 | -0.08     | -0.017 | 0.052  |
| A012772_01 | 0.585     | 0.405     | 0.365     | 0.138     | 0.453  | 0.385     | 0.262  | 0.31   |
| A012773_01 | -0.386    | -0.236    | 0.321     | 0.304     | -0.391 | -0.46     | 0.007  | 0.052  |
| A012776_01 | -0.195    | -0.311    | 0.131     | 0.004     | -0.136 | -0.15 NA  |        | -0.667 |
| A012778_01 | -1.086    | -0.738    | 0.872     | 0.72      | 1.316  | 1.62      | 0.066  | 0.134  |
| A012781_01 | 0.009     | -0.011    | 0.064     | 0.174     | 0.339  | 0.524     | 0.04   | -0.031 |
| A012787_01 | 0.282     | -0.03     | 0.237     | 0.337     | -0.105 | -0.096    | -0.304 | -0.516 |
| A012788_01 | 0.258     | -0.088    | 0.117     | 0.195     | -0.266 | -0.476    | 0.322  | 0.103  |
| A012791_01 | 0.287 NA  |           | 0.29      | 0.327 NA  |        | -0.382    | 0.087  | -0.135 |
| A012796_01 | -0.517 NA |           | -0.126    | -0.089 NA |        | -1.358    | -0.709 | -0.765 |
| A012797_01 | -0.046    | -0.08     | -0.025    | 0.307     | 0.191  | 0.531     | 0.028  | -0.085 |
| A012800_01 | 0.162     | -0.029    | -0.227    | -0.246    | -0.013 | 0.105     | 0.005  | -0.029 |
| A012807_01 | 0.119     | 0.026     | -0.188    | -0.304    | -0.14  | -0.157    | 0.03   | 0.103  |
| A012810_01 | -0.796    | -0.501    | 0.217     | 0.473     | 0.668  | 1.23      | 0.345  | 0.486  |
| A012811_01 | -0.082    | -0.09     | -0.128    | -0.003    | 0.508  | 0.621     | 0.054  | -0.045 |
| A012812_01 | -0.021    | 0.109     | -1.63     | -1.199    | -1.277 | -1.201 NA | NA     |        |
| A012813_01 | -1.42     | -0.81     | -0.039    | -0.196    | -1.284 | -1.467    | -0.604 | -0.511 |
| A012816_01 | -0.135 NA |           | 0.052 NA  | NA        |        | -1.01 NA  | NA     |        |
| A012817_01 | 0.263     | 0.092     | 0.057     | 0.052     | -0.038 | -0.063    | 0.044  | -0.22  |
| A012818_01 | -0.037    | 0.039     | 0.163     | 0.301     | -0.116 | -0.15     | 0.017  | 0.025  |
| A012822_01 | 0.466     | 0.12      | 0.289     | 0.136     | -0.222 | -0.594    | 0.223  | 0.044  |
| A012823_01 | 0.334 NA  |           | -0.001    | -0.059 NA |        | -0.298 NA |        | -0.139 |
| A012826_01 | -0.161    | 0.002     | 0.107     | -0.202    | -0.006 | 0.206     | -0.236 | 0.222  |
| A012828_01 | -0.024    | 0.153     | -0.003    | 0.102     | -0.037 | 0.024     | -0.292 | -0.158 |
| A012829_01 | 0.072     | 0.052     | 0.023     | 0.09      | -0.056 | -0.032    | -0.111 | -0.238 |
| A012830_01 | 0.464     | 0.389     | 0.166     | 0.316     | -0.34  | -0.397    | -0.126 | -0.205 |
| A012832_01 | 0.217     | 0.215     | -0.05     | -0.234    | -0.148 | -0.255    | -0.61  | -0.578 |
| A012834_01 | 0.02 NA   |           | 0.043     | 0.175 NA  | NA     |           | -0.031 | -0.047 |
| A012835_01 | -0.094    | 0.14      | -0.155    | -0.311    | 0.194  | 0.297     | 0.081  | 0.401  |
| A012837_01 | -0.049 NA |           | -0.537    | -0.482    | -0.635 | -0.818    | 0.082  | 0.086  |
| A012838_01 | 0.4       | 0.463     | -0.266    | -0.167    | 0.252  | 0.178     | 0.36   | 0.422  |
| A012839_01 | -0.607    | -0.547 NA |           | -1.913    | -0.54  | -0.177    | -1.061 | -1.193 |
| A012841_01 | 0.128 NA  |           | 0.305     | 0.296 NA  |        | -0.536    | 0.151  | 0.076  |
| A012844_01 | -0.607    | -0.097    | 0.293     | 0.253     | -1.016 | -1.073    | -0.481 | -0.24  |
| A012846_01 | 0.188     | 0.278     | 0.056 NA  |           | 0.164  | -0.041 NA | NA     |        |
| A012847_01 | 0.35      | 0.393     | 0.411     | 0.238     | 0.325  | 0.394     | -0.071 | 0.027  |
| A012849_01 | 0.268     | 0.132     | 0.234     | 0.201     | -0.629 | -0.824    | -0.005 | -0.207 |
| A012854_01 | 0         | 0.028     | -0.123    | -0.016    | 0.151  | 0.207     | 0.187  | 0.295  |
| A012858_01 | 0.216 NA  |           | -0.07     | 0.286 NA  |        | 0.076 NA  |        | 0.124  |
| A012860_01 | -0.121    | 0.113     | 0.264     | 0.227     | 0.601  | 0.927     | -0.229 | -0.119 |
| A012862_01 | 0.008     | -0.133    | -0.019    | 0.003     | -0.762 | -0.533    | -0.176 | -0.139 |
| A012865_01 | 0.284     | 0.528     | 0.089     | 0.1       | 0.298  | 0.653     | -0.22  | 0.04   |
| A012872_01 | -1.653    | -1.45     | -0.545    | -0.612    | 0.799  | 1.306     | -0.129 | 0.099  |
| A012878_01 | -0.07     | -0.039    | -0.046    | -0.085    | -0.113 | -0.053 NA | NA     |        |
| A012880_01 | 1.167     | 1.33      | -0.314    | -0.112    | -0.209 | -0.437    | -0.757 | -0.625 |
| A012881_01 | -0.222    | -0.003    | 0.065     | -0.04     | -0.056 | 0.207     | -0.362 | 0.074  |
| A012883_01 | -0.224    | -0.153    | -0.13     | 0.07      | -0.874 | -1.102    | -0.322 | -0.304 |
| A012885_01 | 0.065     | -0.016    | -0.044    | -0.001    | 0.112  | 0.174     | 0.287  | 0.473  |
| A012887_01 | -0.337    | -0.287    | -0.609    | -0.516    | -0.659 | -0.45     | 0.165  | 0.434  |
| A012888_01 | -0.13     | -0.329    | -0.771    | -0.801    | 0.408  | 0.365     | 0.292  | 0.006  |
| A012889_01 | -0.579    | -0.86     | -1.234    | -1.371    | -1.901 | -2.18     | -1.716 | -1.819 |
| A012890_01 | -0.146    | 0.18      | -0.413    | -0.302    | 0.045  | 0.266     | -0.078 | 0.224  |
| A012893_01 | -2.378    | -1.823    | -4.136    | -3.285    | 0.849  | 1.266     | -1.059 | -1.154 |
| A012895_01 | 0.212     | 0.143     | -0.023    | 0.02      | -0.061 | -0.133    | 0.012  | -0.065 |
| A012896_01 | -0.025    | 0.053     | 0.12      | 0.1       | -0.35  | -0.449    | -0.216 | -0.173 |
| A012897_01 | -0.408    | -0.338    | -0.244    | -0.034    | 0.258  | 0.598     | 0.457  | 0.752  |
| A012899_01 | 0.081     | -0.067    | -0.36     | -0.311    | -0.452 | -0.501    | -0.127 | -0.099 |
| A012907_01 | -0.234 NA |           | 0.05      | 0.069 NA  | NA     | NA        |        | -0.171 |
| A012913_01 | -0.188    | -0.065    | -0.146    | -0.078    | -0.118 | -0.028    | 0.2    | 0.306  |
| A012917_01 | 0.042 NA  |           | 0.139     | 0.157 NA  |        | -0.234    | -0.054 | 0.053  |
| A012919_01 | 0.472     | 0.319     | 0.118     | 0.174     | 0.443  | 0.569     | -0.258 | -0.181 |
| A012921_01 | -0.008    | -0.173    | 0.161     | -0.17     | 0.337  | 0.245     | 0.197  | -0.014 |
| A012930_01 | 0.424     | 0.032     | 0.026     | -0.223    | 0.055  | 0.054     | 0.25   | -0.092 |
| A012932_01 | 0.42      | 0.363     | -0.147    | 0.009     | 0.025  | -0.025 NA |        | 0.189  |
| A012934_01 | 0.357     | 0.323     | 0.047     | -0.01     | 0.339  | 0.463     | 0.061  | 0.136  |
| A012936_01 | -0.074    | -0.041    | -0.158 NA |           | 0.047  | -0.027 NA | NA     |        |
| A012937_01 | 0.26      | 0.082     | 0.075     | -0.001    | 0.11   | 0.018     | 0.012  | -0.14  |

|            |           |           |           |           |        |           |        |        |
|------------|-----------|-----------|-----------|-----------|--------|-----------|--------|--------|
| A012940_01 | -0.102    | -0.058    | 0.015     | 0.175     | 0.416  | 0.677     | 0.008  | 0.249  |
| A012944_01 | 0.011     | 0.312     | 0.097     | -0.129    | -0.067 | 0.177 NA  |        | -0.167 |
| A012946_01 | 0.201 NA  |           | 0.34      | 0.221 NA  |        | -0.345    | -0.001 | -0.009 |
| A012951_01 | 0.197     | 0.118     | -0.089    | -0.052    | 0.342  | 0.366 NA  |        | -0.145 |
| A012958_01 | -0.005 NA |           | 0.439     | 0.21      | 0.281  | 0.28      | 0.045  | 0.048  |
| A012959_01 | 0.107     | 0.019     | -0.109    | -0.203    | 0.215  | 0.283     | 0.085  | 0.096  |
| A012960_01 | -0.207    | -0.311    | -0.298    | -0.411    | -0.127 | 0.057     | 0.239  | 0.369  |
| A012964_01 | 0.105     | 0.219     | 0.337     | 0.241     | 0.379  | 0.4       | 0.119  | 0.284  |
| A012966_01 | -0.175    | -0.298    | -0.27     | -0.266    | 0.483  | 0.63 NA   |        | 0.17   |
| A012972_01 | 0.201 NA  |           | 0.046     | -0.09 NA  | NA     |           | -0.282 | -0.271 |
| A012977_01 | -0.187    | -0.26     | -0.458    | -0.117    | -0.536 | -0.298    | 0.043  | 0.032  |
| A012978_01 | -0.805    | -0.674    | 0.44      | 0.44      | 0.848  | 1.258     | 0.119  | 0.388  |
| A012982_01 | -0.161    | 0.128 NA  | NA        |           | -0.224 | -0.094 NA | NA     |        |
| A012986_01 | -0.391    | -0.561    | -0.334    | -0.579    | 0.141  | 0.336     | 0.26   | 0.043  |
| A012989_01 | -0.017    | -0.066    | 0.13      | 0.153     | 0.115  | 0.168     | 0.04   | 0.025  |
| A012995_01 | 0.051     | 0.25      | 0.313     | 0.331     | -0.394 | -0.627    | 0.043  | -0.07  |
| A013000_01 | 0.244     | 0.433     | -0.062    | -0.145    | 0.34   | 0.489     | -0.25  | -0.009 |
| A013003_01 | 0.463     | 0.576     | 0.177     | 0.033 NA  |        | -1.473 NA | NA     |        |
| A013004_01 | 0.053     | 0.077     | -0.274    | -0.238    | 0.303  | 0.625     | 0.021  | 0.143  |
| A013011_01 | 0.129     | 0.024     | 0.089     | -0.159    | 0.161  | 0.184     | 0.145  | 0.127  |
| A013012_01 | -0.43     | -0.239    | 0.068     | 0.139     | 0.499  | 0.776     | -0.128 | -0.054 |
| A013018_01 | -0.128    | 0.053     | 0.098     | 0.216     | -0.061 | -0.212    | -0.084 | 0.023  |
| A013019_01 | 0.012     | 0.135     | 0.479     | 0.259     | 0.229  | 0.212 NA  | NA     |        |
| A013022_01 | 0.127     | 0.018     | -0.168    | -0.162    | 0.077  | 0.25      | -0.005 | 0.026  |
| A013026_01 | 0.11      | 0.225     | 0.08      | 0.082     | 0.05   | 0.086     | 0.125  | 0.068  |
| A013029_01 | -0.17     | 0.197     | -0.002    | -0.015    | -0.106 | 0.176     | 0.09   | 0.617  |
| A013032_01 | 0.096     | 0.265     | 0.113     | -0.01     | 0.014  | 0.163     | -0.08  | 0.129  |
| A013034_01 | -0.459 NA |           | -0.666 NA | NA        | NA     | NA        |        | 0.087  |
| A013035_01 | 0.108     | 0.092     | -0.183    | -0.236    | 0.46   | 0.417     | 0.169  | 0.087  |
| A013036_01 | -0.422    | -0.232    | -0.08     | -0.011    | -0.442 | -0.53     | -0.188 | -0.003 |
| A013038_01 | -0.337 NA | NA        | NA        | NA        |        | 0.607 NA  |        | 0.379  |
| A013040_01 | -0.072    | 0.041     | 0.013     | -0.005    | 0.148  | 0.172     | -0.043 | 0.005  |
| A013044_01 | 0.457     | 0.2       | -0.114    | -0.161    | 0.345  | 0.347     | 0.208  | 0.211  |
| A013046_01 | 0.07      | 0.008     | -0.072    | -0.029    | 0.305  | 0.231     | 0.061  | -0.121 |
| A013047_01 | -0.118    | -0.179 NA |           | 0.012     | -0.602 | -0.809    | -0.27  | -0.356 |
| A013050_01 | -0.025    | -0.031    | -0.203    | -0.114    | 0.056  | 0.055     | 0.027  | 0.095  |
| A013051_01 | 0.119     | -0.086    | 0.574     | 0.802     | 0.298  | 0.561 NA  |        | -0.211 |
| A013053_01 | -0.243    | -0.28     | 0.01      | 0.086     | -0.077 | 0         | 0.083  | 0.209  |
| A013055_01 | -0.329    | -0.484 NA |           | 0.014     | 0.011  | 0.106 NA  | NA     |        |
| A013058_01 | -0.038    | 0.061     | 0.176     | 0.171     | -0.134 | -0.027    | -0.117 | -0.039 |
| A013062_01 | NA        | NA        | 0.034     | 0.054 NA  |        | -0.731 NA | NA     |        |
| A013063_01 | -0.039    | 0.125     | -0.349    | -0.467    | 0.45   | 0.522     | 0.032  | 0.294  |
| A013065_01 | 0.11 NA   |           | 0.109     | -0.024    | 0.408  | 0.248     | -0.097 | -0.05  |
| A013067_01 | -0.015    | -0.013    | 0.165     | 0.04      | 0.107  | 0.045 NA  | NA     |        |
| A013073_01 | 0.058     | 0.157     | -0.238    | -0.096    | -0.495 | -0.638    | -0.122 | -0.124 |
| A013074_01 | 0.208     | 0.33      | -0.067    | 0.118     | -0.355 | -0.548    | -0.022 | -0.055 |
| A013075_01 | 0.212 NA  |           | -0.394    | -0.118 NA |        | 0.016 NA  | NA     |        |
| A013086_01 | -0.105    | -0.076    | -0.328    | -0.047    | 0.122  | 0.193     | 0.076  | -0.043 |
| A013087_01 | -0.258    | 0.071     | 0.179     | -0.032    | -0.525 | -0.676    | -0.147 | 0.031  |
| A013088_01 | 0.125     | 0.13      | 0.063     | 0.22      | 0.155  | 0.071     | 0.146  | 0.023  |
| A013090_01 | 0.166     | 0.104     | -0.091    | -0.086    | 0.305  | 0.122     | 0.495  | 0.335  |
| A013093_01 | -0.289    | -0.125    | -0.354    | -0.298    | 0.091  | 0.08      | 0.038  | 0.109  |
| A013095_01 | 0.424     | 0.466     | -0.298    | -0.41     | -0.115 | -0.07     | 0.808  | 1.103  |
| A013098_01 | 0.029     | 0.206     | 0.028     | 0.104     | 0.277  | 0.379     | 0.367  | 0.436  |
| A013105_01 | 0.486 NA  |           | -0.013    | -0.018 NA |        | 0.225     | 0.338  | 0.162  |
| A013107_01 | -0.055    | -0.007    | -0.12     | -0.063    | 0.626  | 1.062     | -0.002 | -0.021 |
| A013109_01 | 0.189     | 0.202     | 0.277     | 0.232     | 0.336  | 0.567     | 0.076  | -0.094 |
| A013111_01 | -0.001    | 0.195     | -0.092    | 0.037     | -0.221 | -0.207    | -0.04  | 0.173  |
| A013112_01 | 0.02      | 0.175     | -0.191    | -0.24     | 0.308  | 0.332     | 0.111  | 0.243  |
| A013118_01 | 0.027     | 0.068     | -0.276    | -0.143    | 0.137  | 0.104     | 0.267  | 0.154  |
| A013119_01 | -0.505    | -0.36     | 0.175     | 0.139     | -1.383 | -1.697    | -0.579 | -0.59  |
| A013129_01 | -0.233    | -0.163    | 0.124     | -0.037    | -0.647 | -0.949    | -0.171 | -0.362 |
| A013130_01 | NA        | NA        | 0.205 NA  | NA        |        | -0.277 NA | NA     |        |
| A013142_01 | -0.059    | 0.045     | -0.019    | 0.03      | 0.13   | 0.444     | -0.128 | -0.031 |
| A013143_01 | -0.072    | -0.042    | -0.102    | -0.029    | -0.291 | -0.466    | -0.059 | -0.113 |
| A013154_01 | 0.226     | 0.036     | 0.008     | 0.001     | -0.282 | -0.558    | 0.085  | -0.127 |
| A013156_01 | 0.204     | -0.093    | 0.272     | 0.003     | -0.205 | -0.423    | 0.222  | 0.047  |
| A013164_01 | -0.351    | -0.13     | -0.119    | 0.088     | -0.886 | -0.823    | -0.308 | -0.276 |

|            |    |        |        |        |        |        |        |        |        |
|------------|----|--------|--------|--------|--------|--------|--------|--------|--------|
| A013188_01 |    | -0.208 | -0.08  | 0.246  | 0.348  | -1.265 | -1.063 | -2.264 | -1.974 |
| A013192_01 |    | 0.153  | -0.037 | 0.048  | -0.056 | 0.053  | -0.14  | -0.035 | -0.138 |
| A013196_01 |    | -0.039 | -0.084 | -0.025 | -0.041 | -0.538 | -0.633 | 0.006  | 0.061  |
| A013212_01 |    | -0.215 | 0.055  | -0.121 | -0.324 | 0.448  | 0.644  | -0.006 | 0.174  |
| A013215_01 |    | -0.11  | NA     | 0.471  | 0.361  | NA     | -0.614 | -0.22  | -0.308 |
| A013219_01 |    | 0.153  | 0.171  | -0.043 | 0.065  | -0.164 | -0.164 | NA     | 0.218  |
| A013223_01 |    | 0.072  | 0.169  | -0.051 | -0.072 | -0.042 | -0.113 | -0.056 | 0.22   |
| A013227_01 |    | 0.085  | -0.002 | 0.045  | 0.032  | 0.171  | 0.15   | 0.215  | 0.321  |
| A013238_01 |    | -2.609 | -1.551 | -3.979 | -2.522 | 0.842  | 1.26   | -1.261 | -1.409 |
| A013240_01 |    | 0.022  | 0.171  | -0.236 | -0.191 | 0.253  | 0.334  | -0.005 | 0.133  |
| A013244_01 |    | 0.027  | -0.02  | -0.21  | -0.054 | 0.054  | 0.105  | 0.234  | 0.219  |
| A013246_01 |    | -0.126 | -0.453 | -0.192 | -0.25  | -1.242 | -1.447 | NA     | NA     |
| A013249_01 |    | 0.106  | -0.057 | -0.232 | -0.087 | 0.282  | 0.28   | 0.217  | 0.204  |
| A013260_01 |    | -0.008 | NA     | -0.289 | -0.099 | 0.163  | 0.172  | 0.134  | 0.122  |
| A013266_01 |    | 0.196  | 0.143  | 0.08   | 0.029  | 0.189  | 0.124  | -0.017 | -0.046 |
| A013268_01 |    | 0.117  | 0.044  | 0.212  | 0.188  | 0.263  | 0.347  | -0.019 | 0.042  |
| A013270_01 |    | 0.156  | 0.282  | -0.083 | -0.044 | 0.207  | 0.311  | -0.096 | -0.025 |
| A013277_01 |    | 0.06   | 0.232  | 0.288  | 0.247  | 0.286  | 0.075  | -0.054 | -0.017 |
| A013278_01 |    | 0.125  | NA     | 0.067  | -0.035 | 0.168  | 0.063  | -0.032 | 0.142  |
| A013281_01 |    | -0.203 | NA     | 0.203  | 0.203  | NA     | -0.534 | 0.102  | -0.042 |
| A013282_01 |    | 0.15   | -0.081 | 0.266  | 0.041  | -0.033 | -0.075 | -0.069 | -0.26  |
| A013287_01 |    | 0.376  | 0.249  | -0.086 | -0.085 | 0.04   | -0.071 | 0.211  | 0.136  |
| A013299_01 |    | -0.055 | -0.324 | 0.081  | -0.172 | -0.406 | -0.648 | -0.176 | -0.326 |
| A013356_01 |    | -0.261 | -0.266 | -0.126 | -0.169 | -0.091 | 0.037  | -0.092 | -0.152 |
| A013397_01 |    | 0.008  | 0.25   | 0.153  | -0.001 | -0.13  | 0.014  | -0.19  | 0.263  |
| A013402_01 |    | 0.62   | 0.337  | 0.438  | 0.69   | 0.464  | 0.476  | 0.085  | -0.166 |
| A013406_01 | NA |        | 0.616  | -0.038 | -0.154 | NA     | 0.175  | -0.048 | NA     |
| A013408_01 |    | 0.068  | 0.125  | -0.048 | 0.081  | 0.224  | 0.365  | 0.031  | 0.011  |
| A013412_01 |    | 0.135  | -0.12  | -0.228 | 0.009  | -0.759 | -0.741 | 0.091  | 0      |
| A013413_01 |    | 0.617  | NA     | 0.432  | 0.384  | 0.489  | 0.659  | NA     | -0.359 |
| A013414_01 |    | 0.21   | -0.077 | -0.107 | -0.094 | -0.144 | -0.306 | -0.025 | -0.192 |
| A013416_01 |    | 0.072  | -0.122 | 0.641  | 0.493  | -0.856 | -1.075 | -0.259 | -0.631 |
| A013417_01 |    | 0.68   | 0.792  | -0.025 | 0.01   | -1.726 | -2.377 | -0.353 | -0.31  |
| A013419_01 |    | -0.219 | -0.017 | 0.258  | 0.305  | -0.128 | -0.456 | -0.176 | -0.264 |
| A013420_01 |    | 0.502  | 0.172  | -0.195 | NA     | 0.295  | 0.299  | NA     | NA     |
| A013421_01 |    | 0.329  | 0.245  | -0.043 | 0.199  | -0.304 | -0.191 | -0.03  | -0.129 |
| A013423_01 |    | 0.199  | -0.076 | -0.294 | -0.057 | 0.042  | 0.176  | 0.094  | 0.092  |
| A013428_01 |    | 0.341  | -0.088 | -0.215 | -0.135 | -0.195 | -0.031 | 0.251  | -0.142 |
| A013429_01 |    | 0.367  | 0.386  | 0.296  | 0.124  | -0.333 | -0.662 | -0.21  | -0.164 |
| A013435_01 |    | 0.512  | 0.495  | 0.23   | 0.2    | 0.185  | 0.243  | 0.135  | 0.074  |
| A013440_01 |    | 0.114  | NA     | 0.09   | -0.048 | 0.306  | 0.173  | 0.086  | -0.276 |
| A013447_01 |    | 0.121  | -0.18  | 0.195  | 0.098  | 0.8    | 0.816  | NA     | NA     |
| A013461_01 |    | -0.317 | NA     | -0.208 | -0.404 | 0.225  | 0.4    | NA     | 0.186  |
| A013462_01 |    | 0.081  | NA     | 0.01   | -0.177 | -0.009 | 0.186  | 0.048  | 0.004  |
| A013463_01 |    | -0.119 | -0.001 | -0.136 | NA     | 0.255  | 0.446  | NA     | 0.282  |
| A013467_01 |    | -0.529 | -0.502 | 0.334  | 0.458  | 0.271  | 0.387  | -0.258 | -0.386 |
| A013468_01 |    | 0.233  | 0.283  | 0.099  | -0.132 | 0.592  | 0.643  | 0.161  | 0.295  |
| A013469_01 |    | 0.18   | 0.174  | -0.084 | 0.098  | 0.031  | -0.013 | 0.026  | -0.005 |
| A013470_01 |    | 0.344  | 0.46   | -0.315 | -0.105 | 0.387  | 0.53   | 0.141  | 0.215  |
| A013475_01 |    | 0.139  | NA     | NA     | -0.782 | -0.277 | -0.133 | NA     | -0.533 |
| A013477_01 |    | 0.039  | NA     | 0.007  | -0.16  | NA     | -0.035 | 0.074  | NA     |
| A013479_01 |    | -0.156 | NA     | 0.059  | 0.022  | NA     | NA     | -0.043 | -0.143 |
| A013487_01 |    | -0.12  | NA     | 0.026  | -0.068 | 0.12   | 0.163  | -0.097 | -0.009 |
| A013488_01 |    | -0.137 | -0.196 | 0.209  | 0.038  | -0.297 | -0.582 | NA     | -0.303 |
| A013490_01 |    | 0.213  | 0.133  | 0.031  | -0.105 | 0.056  | -0.053 | 0.074  | -0.242 |
| A013498_01 |    | 0.079  | 0.103  | -0.24  | -0.111 | -0.094 | -0.1   | 0.152  | -0.1   |
| A013503_01 |    | -0.02  | -0.071 | -0.194 | 0.09   | -0.137 | 0.008  | 0.006  | -0.068 |
| A013510_01 |    | 0.158  | NA     | 0.022  | NA     | 0.197  | 0.257  | NA     | -0.2   |
| A013518_01 |    | 0.146  | 0.146  | 0.625  | 0.276  | 0.501  | 0.439  | -0.018 | -0.119 |
| A013519_01 |    | -1.302 | -0.987 | 1.214  | 1.06   | -0.212 | 0.004  | -1.434 | -0.909 |
| A013520_01 |    | 0.782  | NA     | 0.227  | 0.158  | 0.581  | 0.473  | -0.189 | -0.354 |
| A013522_01 |    | -0.401 | -0.228 | -0.113 | -0.259 | -0.081 | -0.101 | 0.168  | 0.282  |
| A013534_01 |    | -0.029 | -0.092 | 0.061  | -0.248 | 0.414  | 0.378  | 0.07   | 0.154  |
| A013535_01 |    | -0.41  | 0.07   | -0.217 | -0.409 | 0.483  | 0.953  | 0.161  | 0.588  |
| A013537_01 |    | 0.247  | 0.424  | -0.597 | -0.495 | -0.053 | -0.319 | 0.133  | 0.158  |
| A013547_01 |    | 0.255  | -0.055 | -0.148 | -0.268 | -0.1   | -0.18  | 0.439  | 0.2    |
| A013548_01 |    | 0.216  | NA     | -0.016 | 0.118  | NA     | -0.189 | NA     | NA     |
| A013554_01 |    | -2.096 | -1.816 | 0.716  | 0.868  | -2.328 | -2.216 | -1.949 | -1.707 |

|            |    |        |        |        |        |        |        |        |        |
|------------|----|--------|--------|--------|--------|--------|--------|--------|--------|
| A013555_01 | NA |        | -1.512 | 1.004  | 0.898  | NA     | -2.03  | -1.777 | -1.981 |
| A013559_01 |    | -0.117 | -0.361 | -0.397 | -0.512 | 0.56   | 0.734  | 0.3    | 0.206  |
| A013560_01 |    | 0.573  | 0.414  | 0.328  | 0.241  | 0.843  | 0.66   | 0.299  | 0.24   |
| A013561_01 | NA |        | -0.538 | -0.088 | -0.282 | NA     | -1.184 | NA     |        |
| A013562_01 |    | 0.501  | NA     | 0.501  | 0.301  | NA     | NA     | 0.384  | 0.596  |
| A013564_01 |    | -0.184 | -0.378 | 0.019  | -0.257 | -0.125 | -0.104 | NA     | -0.324 |
| A013571_01 |    | 0.147  | -0.203 | -0.127 | -0.218 | 0.27   | 0.191  | NA     | -0.201 |
| A013572_01 |    | -0.244 | -0.35  | -0.19  | -0.128 | -0.186 | -0.037 | -0.042 | -0.092 |
| A013574_01 |    | 0.196  | 0.245  | 0.074  | 0.26   | 0.125  | 0.087  | NA     | -0.038 |
| A013577_01 |    | 0.093  | 0.199  | -0.114 | -0.055 | 0.18   | 0.196  | 0.165  | 0.166  |
| A013579_01 |    | -0.093 | -0.16  | -0.322 | -0.186 | -0.243 | -0.355 | 0.101  | 0.132  |
| A013586_01 |    | 0.208  | NA     | 0.042  | 0.017  | 0.282  | 0.399  | 0.224  | 0.195  |
| A013590_01 |    | 0.194  | -0.217 | -0.019 | -0.1   | -0.028 | -0.074 | NA     |        |
| A013591_01 |    | 0.349  | -0.074 | 0.214  | -0.217 | 0.291  | 0.022  | NA     | 0.014  |
| A013604_01 |    | 0.241  | -0.115 | 0.088  | -0.022 | 0.164  | 0.161  | 0.138  | -0.033 |
| A013605_01 |    | 0.466  | 0.367  | -0.033 | 0.092  | 0.324  | 0.303  | 0.156  | 0.075  |
| A013606_01 |    | -0.657 | -0.546 | 0.089  | 0.001  | -0.804 | -0.89  | -0.195 | -0.14  |
| A013614_01 |    | 0.025  | -0.265 | -0.37  | -0.685 | -0.202 | -0.344 | NA     |        |
| A013616_01 |    | -0.133 | -0.201 | 0.014  | -0.099 | -0.138 | -0.309 | 0.153  | 0.006  |
| A013617_01 |    | -0.016 | NA     | -0.074 | -0.283 | -0.169 | -0.145 | 0.223  | 0.321  |
| A013618_01 |    | -1.369 | NA     | 0.252  | 0.026  | -0.384 | -0.119 | NA     | 0.139  |
| A013619_01 |    | 0.208  | 0.173  | -0.079 | -0.092 | 0.288  | 0.31   | 0.156  | 0.048  |
| A013622_01 |    | 0.253  | 0.072  | -0.072 | 0.111  | -0.294 | -0.377 | 0.007  | -0.142 |
| A013625_01 |    | -0.082 | -0.222 | 0.194  | -0.027 | -0.33  | -0.53  | -0.045 | -0.45  |
| A013627_01 |    | 0.203  | 0.377  | -0.089 | -0.329 | 0.219  | 0.332  | 0.028  | 0.113  |
| A013628_01 |    | 0.135  | 0.001  | -0.093 | -0.276 | -0.069 | -0.067 | 0.111  | 0.067  |
| A013632_01 |    | 0.195  | -0.025 | 0.146  | NA     | 0.03   | -0.008 | NA     |        |
| A013633_01 |    | -0.037 | -0.368 | 0.013  | -0.018 | -0.149 | -0.209 | NA     | -0.233 |
| A013634_01 |    | 0.274  | -0.057 | -0.319 | -0.465 | 0.086  | 0.033  | 0.324  | 0.214  |
| A013637_01 |    | -0.237 | NA     | 0.333  | 0.045  | 0.191  | 0.053  | NA     |        |
| A013640_01 |    | 0.18   | 0.149  | 0.398  | 0.17   | 0.038  | -0.112 | -0.065 | 0.058  |
| A013643_01 |    | 0.639  | 0.451  | -0.009 | -0.168 | -0.458 | -0.806 | 0.158  | 0.061  |
| A013644_01 |    | 0.15   | 0.052  | 0.131  | -0.078 | 0.222  | 0.274  | -0.064 | 0.03   |
| A013646_01 |    | 0.117  | 0.122  | -0.06  | -0.378 | -0.006 | 0.04   | -0.213 | -0.122 |
| A013647_01 |    | 0.148  | NA     | 0.049  | 0.008  | -0.7   | -0.717 | NA     | -0.648 |
| A013651_01 |    | -0.28  | NA     | 0.006  | NA     | -0.017 | -0.169 | NA     | 0.115  |
| A013657_01 |    | 0.379  | 0.231  | -0.389 | -0.558 | 0.22   | 0.243  | NA     | 0.191  |
| A013658_01 |    | 0.197  | -0.032 | 0.166  | 0.284  | -0.44  | -0.396 | 0.011  | -0.129 |
| A013659_01 |    | -0.017 | -0.079 | -0.21  | -0.131 | -0.346 | -0.579 | 0.046  | -0.115 |
| A013660_01 |    | 0.306  | 0.123  | 0.214  | 0.082  | -0.114 | -0.373 | -0.024 | -0.199 |
| A013661_01 |    | 0.304  | 0.333  | -0.196 | -0.149 | -0.2   | -0.203 | -0.341 | -0.145 |
| A013662_01 |    | 0.198  | -0.034 | 0.046  | -0.092 | -0.1   | -0.283 | 0.025  | -0.26  |
| A013663_01 |    | 0.273  | NA     | 0.085  | -0.023 | 0.329  | 0.443  | NA     | 0.034  |
| A013664_01 |    | 0.269  | 0.071  | 0.017  | -0.289 | 0.255  | 0.138  | 0.119  | -0.037 |
| A013667_01 |    | -0.018 | NA     | 0.63   | 0.439  | 0.432  | 0.438  | 0.255  | -0.016 |
| A013668_01 |    | -0.099 | 0.311  | -0.251 | -0.151 | 0.084  | 0.404  | 0.193  | 0.336  |
| A013669_01 |    | -0.412 | -0.285 | 0.136  | 0.31   | -0.684 | -0.599 | -0.456 | -0.478 |
| A013671_01 |    | 0.204  | NA     | -0.012 | NA     | -0.224 | -0.418 | NA     | -0.165 |
| A013674_01 |    | -0.363 | -0.426 | 0.028  | -0.174 | NA     | -0.34  | 0.281  | 0.113  |
| A013675_01 |    | 0.224  | NA     | 0.379  | 0.282  | 0.011  | -0.117 | NA     | -0.378 |
| A013676_01 |    | 0.26   | 0.277  | -0.988 | -1.252 | -0.505 | -0.761 | -0.631 | -0.627 |
| A013680_01 |    | -0.04  | -0.054 | 0.043  | 0.156  | 0.19   | 0.427  | 0.026  | -0.189 |
| A013681_01 |    | -0.308 | -0.237 | 0.009  | -0.226 | 0.242  | 0.371  | 0.04   | 0.105  |
| A013682_01 |    | 0.463  | NA     | -0.008 | 0.176  | 0.073  | 0.014  | 0.081  | -0.082 |
| A013684_01 |    | -0.091 | NA     | 0.127  | 0.204  | NA     | 0.218  | NA     |        |
| A013685_01 |    | 0.107  | 0.029  | NA     | 0.032  | -0.638 | -0.55  | NA     |        |
| A013689_01 |    | 0.097  | -0.035 | 0.07   | 0.175  | -0.077 | -0.094 | 0.002  | -0.188 |
| A013691_01 |    | -0.406 | -0.329 | -1.115 | -1.243 | NA     | NA     | -1.882 | -2.054 |
| A013692_01 |    | 0.173  | 0.231  | 0.093  | -0.104 | 0.063  | -0.076 | -0.116 | -0.023 |
| A013695_01 |    | 0.526  | 0.481  | 0.43   | 0.607  | 0.263  | 0.233  | 0.197  | 0.244  |
| A013697_01 |    | 0.355  | 0.523  | -0.568 | -0.437 | -0.407 | -0.396 | 0.075  | 0.126  |
| A013699_01 |    | -0.486 | -0.213 | 0.058  | -0.068 | -0.315 | -0.433 | 0.007  | 0.066  |
| A013700_01 |    | 1.106  | 0.76   | -0.059 | -0.198 | 0.727  | 0.266  | 0.621  | 0.283  |
| A013705_01 |    | -0.327 | -0.255 | 0.58   | 0.388  | 0.637  | 0.709  | -0.145 | -0.09  |
| A013707_01 |    | 0.207  | -0.1   | -0.181 | -0.208 | -0.334 | -0.584 | 0.058  | -0.409 |
| A013710_01 |    | -0.001 | -0.139 | 0.05   | 0.216  | -0.216 | -0.179 | 0.021  | -0.234 |
| A013711_01 |    | -1.467 | -1.46  | NA     | NA     | -2.113 | -2.167 | NA     |        |
| A013714_01 |    | 0.175  | 0.516  | -0.239 | -0.453 | -0.11  | -0.03  | -0.032 | 0.256  |



|            |    |           |           |           |           |        |           |           |        |
|------------|----|-----------|-----------|-----------|-----------|--------|-----------|-----------|--------|
| A013715_01 |    | 0.106     | 0.098     | -0.038    | 0.021     | -0.045 | 0.185     | -0.08     | -0.146 |
| A013717_01 |    | 0.347     | 0.564     | -0.379    | -0.308    | 0.305  | 0.434     | 0.029     | -0.017 |
| A013719_01 |    | -0.139    | 0.186     | -0.117    | -0.02     | 0.097  | 0.425     | -0.317    | -0.176 |
| A013720_01 |    | -0.048 NA |           | 0.09      | 0.067     | 0.241  | 0.246     | 0.291     | 0.113  |
| A013721_01 |    | 0.013     | 0.178     | -0.342    | -0.191    | 0.042  | 0.094     | -0.086    | -0.11  |
| A013723_01 |    | 0.183     | 0.071     | 0.02      | 0.089     | 0.319  | 0.417 NA  |           | -0.141 |
| A013724_01 |    | -0.009    | -0.085    | -0.091    | -0.127    | 0.125  | 0.066     | 0.318     | 0.17   |
| A013727_01 | NA |           | -0.02     | -0.087    | -0.309    | -0.277 | -0.389    | 0.181     | 0.225  |
| A013728_01 |    | -0.124    | 0.255     | 0.01      | -0.074    | 0.433  | 0.64      | 0.062     | 0.22   |
| A013731_01 |    | 0.152     | 0.037     | -0.178    | -0.343    | 0.201  | -0.006    | 0.194 NA  |        |
| A013732_01 |    | 0.075     | 0.022     | -0.787    | -0.908    | 0.366  | 0.448     | -0.588    | -0.775 |
| A013733_01 |    | -0.049    | -0.13     | -0.15     | -0.425    | -0.752 | -0.94     | -0.144 NA |        |
| A013735_01 |    | -0.136    | -0.243    | 0.045     | -0.114    | 0.06   | 0.076     | -0.078    | 0.138  |
| A013736_01 |    | 0.054     | 0.01      | 0.124     | -0.011    | 0.199  | 0.484     | 0.213     | 0.273  |
| A013739_01 |    | -0.107    | -0.148    | -0.061    | -0.013    | 0.089  | 0.255     | 0.201 NA  |        |
| A013744_01 |    | 0.153     | 0.328     | 0.166     | -0.049    | 0.572  | 0.773     | -0.161    | 0.038  |
| A013746_01 |    | 0.119 NA  |           | -0.04     | -0.105 NA |        | -0.101    | 0.108     | -0.14  |
| A013747_01 |    | 0.138     | 0.158     | 0.468     | 0.263     | -0.367 | -0.569 NA |           | -0.047 |
| A013749_01 |    | -0.435    | -0.594    | 0.025     | -0.281    | 0.296  | 0.3       | 0.596     | 0.743  |
| A013751_01 |    | 0.063     | -0.007    | -0.128    | -0.113    | 0.292  | 0.328     | 0.367     | 0.187  |
| A013755_01 |    | -0.736    | -0.485    | -0.184    | -0.28     | -0.455 | -0.302    | 0.057     | 0.008  |
| A013756_01 |    | -0.063 NA |           | 0.04      | -0.07     | 0.08   | 0.045     | 0.236     | 0.093  |
| A013758_01 |    | -0.015    | 0.095     | -0.146    | -0.223    | 0.224  | 0.173     | 0.132     | 0.06   |
| A013764_01 |    | -0.208    | 0.261     | -0.237    | -0.29     | -0.423 | -0.37     | -0.109    | 0.287  |
| A013765_01 |    | 0.09      | 0.11      | 0.248     | 0.267     | 0.058  | -0.024    | -0.129    | -0.157 |
| A013770_01 |    | 0.194     | 0.227     | 0.068     | 0.208     | 0.409  | 0.681     | -0.329    | -0.26  |
| A013773_01 |    | 0.228     | 0.246     | 0.131     | 0.078     | 0.132  | 0.138     | -0.067    | -0.06  |
| A013774_01 |    | -0.753    | -0.769    | 0.416     | 0.161     | -0.469 | -0.609    | -0.334    | -0.349 |
| A013775_01 | NA |           | NA        | 0.245     | 0.151 NA  |        | 0.148     | 0.011     | 0.19   |
| A013778_01 |    | 0.108     | 0.139 NA  |           | -0.352    | -0.033 | 0.064     | 0.063     | 0.225  |
| A013780_01 |    | 0.683     | 0.646     | -0.379    | -0.149    | 0.531  | 0.737     | 0.011     | -0.072 |
| A013782_01 |    | -0.063    | -0.23     | -0.376    | -0.371    | -0.176 | -0.111    | 0.001     | -0.123 |
| A013785_01 |    | 0.252     | -0.016    | 0.152     | -0.099    | -0.124 | -0.374    | 0.195     | -0.001 |
| A013787_01 |    | 0.251     | 0.174     | -0.274    | -0.392    | 0.181  | -0.016    | 0.073     | 0.112  |
| A013795_01 |    | 0.33 NA   |           | -0.036    | -0.06     | 0.603  | 0.609     | 0.133     | -0.25  |
| A013796_01 |    | 0.161     | 0.146     | -0.188    | -0.383    | 0.463  | 0.489     | 0.214     | 0.263  |
| A013799_01 |    | -0.078    | 0.135     | 0.224     | 0.196     | 0.771  | 0.971     | 0.432     | 0.385  |
| A013801_01 |    | -0.029    | -0.001    | -0.037    | -0.274    | 0.122  | 0.145     | -0.07 NA  |        |
| A013805_01 |    | 0.192     | 0.071     | -0.386    | -0.233    | 0.206  | 0.49      | 0.099     | 0.029  |
| A013806_01 |    | 0.03      | -0.116    | -0.02     | -0.113    | 0.135  | 0.01      | 0.156     | 0.098  |
| A013807_01 |    | -0.119    | -0.171    | -0.019    | 0.034     | -0.181 | 0.095     | -0.114 NA |        |
| A013810_01 | NA |           | -0.248    | 0.301     | 0.03      | -0.115 | -0.08     | -0.011 NA |        |
| A013829_01 |    | 0.121 NA  |           | -0.005    | -0.251    | 0.163  | 0.024 NA  |           | 0.227  |
| A013831_01 |    | -0.692    | -0.782    | -0.087    | -0.149    | -0.946 | -0.848    | -1.233 NA |        |
| A013832_01 |    | -0.059    | 0.023     | 0.293     | 0.056     | -0.289 | -0.575    | 0.028     | 0.093  |
| A013833_01 |    | 0.066     | 0.263     | -0.233    | -0.175    | 0.298  | 0.414     | 0.233     | 0.322  |
| A013835_01 |    | -0.253    | -0.174    | -0.367    | -0.166    | -0.265 | -0.413    | 0.366     | 0.268  |
| A013847_01 |    | 0.213 NA  |           | 0.112     | 0.081 NA  |        | 0.168     | 0.246     | 0.068  |
| A013856_01 |    | -0.189    | -0.049 NA |           | -0.214    | -1.228 | -1.545 NA | NA        |        |
| A013857_01 |    | -0.028    | 0.025     | 0.083     | 0.144     | -0.022 | -0.088    | 0.112     | 0.021  |
| A013863_01 |    | -0.344    | -0.421    | 0.226     | 0.186     | -0.185 | -0.175    | 0.132     | -0.025 |
| A013872_01 |    | -0.902    | -0.914    | -0.305    | -0.224    | -1.126 | -1.254    | -0.443    | -0.954 |
| A013875_01 | NA |           | -0.586    | -0.45     | -0.619    | 0.261  | 0.439     | 0.109     | 0.026  |
| A013876_01 |    | -0.141    | 0.048     | -0.176    | -0.301    | -0.144 | 0.16      | 0.229     | 0.282  |
| A013879_01 |    | 0.208     | 0.371     | -0.278    | -0.201    | 0.145  | 0.245     | 0.18      | 0.304  |
| A013880_01 |    | 0.533     | 0.487     | -0.013    | 0.103     | -0.454 | -0.659    | -0.117    | -0.111 |
| A013884_01 |    | 0.091     | 0.049     | 0.144     | -0.077    | -0.04  | -0.107    | -0.05     | -0.135 |
| A013887_01 | NA |           | NA        | 0.006     | -0.114 NA |        | 0.008     | -0.106    | -0.085 |
| A013889_01 |    | 0.194     | -0.165    | -0.078    | -0.034    | -0.047 | -0.135 NA |           | -0.238 |
| A013896_01 |    | 0.34      | -0.011    | 0.22      | 0.058     | 0.7    | 0.727 NA  |           | 0.054  |
| A013898_01 |    | 0.342     | 0.426     | 0.042     | 0.093     | 0.315  | 0.316     | -0.078    | 0.073  |
| A013901_01 |    | 0.165 NA  |           | -0.165    | -0.09     | -0.281 | -0.162 NA |           | -0.105 |
| A013903_01 |    | -0.888    | -0.815    | -0.182    | -0.263    | -1.828 | -1.895    | -0.694    | -0.79  |
| A013904_01 |    | -0.117    | -0.161    | 0.29      | 0.332     | 0.502  | 0.686     | 0.315     | 0.24   |
| A013911_01 | NA |           | -0.835    | -0.592 NA | NA        |        | -1.394 NA | NA        |        |
| A013912_01 |    | 0.249     | 0.093     | -0.012    | -0.159    | 0.049  | -0.048    | 0.109     | 0.092  |
| A013914_01 |    | -0.044    | 0.038     | -0.184    | -0.358    | 0.176  | 0.217 NA  |           | 0.144  |
| A013931_01 |    | -0.292    | -0.217    | -0.046    | -0.146    | -0.235 | -0.2      | -0.083    | -0.144 |

|            |    |           |        |          |           |        |           |        |        |
|------------|----|-----------|--------|----------|-----------|--------|-----------|--------|--------|
| A013932_01 |    | 0.337     | 0.029  | 0.089    | 0.119     | 0.194  | 0.01      | 0.028  | -0.199 |
| A013942_01 |    | 0.099     | 0.047  | -0.031   | 0.048     | -0.342 | -0.518    | -0.047 | -0.17  |
| A013944_01 |    | 0.505     | 0.345  | 0.278    | 0.095     | 0.242  | 0.169     | 0.063  | -0.04  |
| A013945_01 |    | 0.249     | -0.042 | -0.301   | -0.166    | 0.153  | 0.179     | 0.36   | 0.044  |
| A013948_01 |    | 0.191     | 0.355  | 0.133    | 0.314     | 0.018  | 0.181     | -0.065 | 0.142  |
| A013950_01 |    | 0.247     | 0.202  | 0.17     | -0.039    | -0.073 | -0.214    | -0.061 | -0.141 |
| A013951_01 |    | 0.359     | 0.345  | 0.164    | 0.166     | 0.277  | 0.273     | 0.085  | 0.092  |
| A013956_01 |    | -0.195    | -0.3   | -0.303   | -0.253    | -0.214 | -0.254    | 0.041  | -0.095 |
| A013960_01 |    | 0.09      | 0.164  | 0.172    | 0.188     | 0.393  | 0.533     | 0.051  | 0.059  |
| A013971_01 |    | 0.326     | 0.38   | 0.153    | 0.007     | 0.229  | 0.052     | 0.04   | 0.008  |
| A013973_01 |    | -0.254    | -0.213 | 0.081    | 0.01      | -0.072 | -0.161    | -0.019 | -0.219 |
| A013974_01 |    | 0.411     | 0.428  | -0.165   | -0.078    | -0.147 | -0.233    | -0.153 | -0.101 |
| A013975_01 |    | 0.386     | 0.379  | -0.029   | -0.205    | 0.04   | -0.358    | -0.194 | -0.323 |
| A013980_01 |    | 0.346     | 0.133  | 0.022    | 0.086     | 0.471  | 0.487 NA  |        | -0.006 |
| A013987_01 |    | 0.218     | 0.135  | -0.214   | -0.084    | -0.031 | -0.036    | 0.143  | -0.004 |
| A013989_01 |    | -0.048    | -0.126 | -0.184   | -0.065    | -0.981 | -1.035    | -0.614 | -0.644 |
| A013994_01 |    | 0.024     | 0.128  | -0.06    | -0.005    | 0.159  | 0.171     | -0.049 | -0.109 |
| A013995_01 |    | -0.034    | 0.085  | -0.312   | -0.249    | -0.628 | -0.927    | -0.235 | -0.351 |
| A013998_01 |    | -0.17 NA  |        | -0.016   | -0.03     | -0.253 | -0.255    | -0.048 | -0.075 |
| A014000_01 |    | 0.179     | 0.264  | 0.604    | 0.392     | -0.055 | -0.121    | -0.009 | -0.261 |
| A014010_01 |    | 0.077     | 0.161  | 0.242    | 0.015     | -0.036 | -0.132    | -0.092 | -0.025 |
| A014014_01 |    | 0.236     | 0.209  | 0.197    | 0.17      | 0.102  | 0.022     | 0.128  | -0.066 |
| A014015_01 |    | 0.328 NA  |        | -0.004   | 0.043 NA  | NA     |           | 0.238  | -0.02  |
| A014016_01 | NA | NA        | NA     |          | 0.409 NA  |        | 0.547 NA  |        | 0.233  |
| A014017_01 |    | -1.324    | -1.035 | -0.998   | -0.909    | 0.211  | 0.753     | -0.22  | -0.361 |
| A014019_01 |    | 0.111 NA  |        | 0.419 NA | NA        | NA     | NA        |        | 0.206  |
| A014020_01 |    | 0.367     | 0.305  | 0.176    | 0.147     | 0      | -0.083    | -0.037 | 0.008  |
| A014021_01 |    | 0.008 NA  |        | -0.301   | -0.326    | 0.486  | 0.806     | -0.156 | -0.011 |
| A014024_01 |    | 0.119     | 0.148  | 0.252    | 0.141     | 0.004  | 0.036     | -0.329 | -0.384 |
| A014025_01 |    | 0.55      | 0.056  | 0.085    | -0.103    | 0.169  | -0.061    | 0.113  | -0.089 |
| A014026_01 |    | -0.138    | 0.043  | -0.363   | -0.28     | -0.227 | -0.368    | 0.519  | 0.334  |
| A014027_01 |    | -0.026 NA |        | 0.286    | 0.177     | 0.102  | 0.158 NA  |        | 0.423  |
| A014031_01 |    | -0.014    | -0.04  | -0.059   | -0.123    | 0.113  | 0.149     | 0.213  | -0.009 |
| A014036_01 |    | -0.245    | -0.138 | -0.044   | 0.098     | -0.187 | 0.078     | -0.002 | 0.219  |
| A014038_01 |    | -0.065    | 0.147  | 0.054    | 0.201     | -0.422 | -0.426    | -0.027 | -0.13  |
| A014040_01 |    | -3.336    | -2.745 | -1.827   | -2.125    | -3     | -3.13 NA  |        | -1.827 |
| A014043_01 |    | 0.17      | 0.133  | 0.499    | 0.055 NA  |        | -0.225 NA |        | -0.293 |
| A014046_01 |    | 0.168     | 0.03   | -0.251   | -0.184    | 0.009  | 0.014     | 0.221  | 0.068  |
| A014056_01 |    | 0.278     | 0.264  | 0.287    | 0.079     | 0.558  | 0.556     | 0.208  | 0.154  |
| A014062_01 |    | 0.146     | 0.166  | 0.016    | -0.127    | -0.04  | 0.041     | 0.147  | 0.016  |
| A014064_01 |    | 0.045     | -0.277 | 0.114    | -0.049    | 0.103  | 0.116 NA  | NA     |        |
| A014066_01 |    | 0.478     | 0.482  | -0.662   | -0.729    | 0.384  | 0.336     | 0.103  | 0.115  |
| A014067_01 |    | -0.004    | -0.086 | -0.43    | -0.355    | -0.129 | -0.234    | 0.283  | 0.178  |
| A014068_01 |    | -0.618 NA |        | -1.09    | -1.078    | -0.763 | -1.064    | -0.308 | -0.774 |
| A014069_01 |    | -0.154    | -0.164 | 0.144    | -0.197    | 0.293  | 0.357     | -0.079 | -0.06  |
| A014072_01 |    | -0.036    | 0.06   | -0.226   | -0.149    | 0.228  | 0.461     | 0.051  | 0.11   |
| A014075_01 |    | -0.149    | -0.423 | 0.09     | 0.298     | -0.595 | -0.562    | -0.416 | -0.51  |
| A014083_01 | NA | NA        |        | -0.36    | -0.474 NA |        | 0.004     | 0.129  | 0.068  |
| A014084_01 |    | 0.056     | 0.228  | 0.218    | 0.079     | -0.061 | -0.22     | 0.025  | -0.016 |
| A014085_01 |    | -0.091 NA |        | 0.048 NA |           | 0.255  | 0.101 NA  | NA     |        |
| A014086_01 |    | -0.431 NA | NA     |          | -0.474    | -0.006 | -0.007 NA |        | -0.362 |
| A014088_01 |    | -0.022    | 0.084  | -0.217   | -0.331    | -0.145 | -0.181    | -0.03  | -0.235 |
| A014089_01 |    | 0.329     | 0.272  | 0.359    | 0.323     | -0.506 | -0.688    | -0.21  | -0.329 |
| A014095_01 |    | -0.203    | -0.166 | 0.085    | 0.033     | -0.037 | -0.135 NA | NA     |        |
| A014097_01 |    | -0.07     | 0.082  | -0.153   | -0.164    | 0.073  | 0.336     | -0.216 | -0.177 |
| A014098_01 |    | 0.185     | -0.078 | 0.025    | 0.147     | -0.038 | -0.136    | -0.122 | -0.291 |
| A014109_01 |    | 0.2       | 0.199  | 0.018    | 0.008     | -0.16  | -0.338    | -0.047 | -0.023 |
| A014112_01 |    | 0.266 NA  |        | 0.184    | 0.064 NA  |        | 0.096 NA  | NA     |        |
| A014113_01 |    | 0.141     | 0.048  | -0.095   | -0.11     | 0.055  | -0.016    | 0.14   | 0.037  |
| A014115_01 |    | 0.639     | 0.327  | -0.032   | 0.022     | -1.584 | -2.29     | 0.15   | 0.011  |
| A014117_01 |    | -0.021 NA |        | -0.046   | -0.026 NA | NA     |           | 0.373  | 0.183  |
| A014119_01 |    | -0.111    | 0.002  | 0.031    | -0.022    | 0.323  | 0.264     | -0.029 | -0.052 |
| A014121_01 |    | 0.851     | 0.869  | 0.636    | 0.552     | 0.68   | 0.603     | -0.572 | -0.552 |
| A014124_01 |    | 0.375     | 0.2    | -0.13    | -0.019    | 0.364  | 0.31      | 0.382  | 0.213  |
| A014126_01 |    | 0.011     | -0.038 | -0.151   | -0.063    | 0.227  | 0.265     | 0.237  | 0.135  |
| A014130_01 |    | -0.622    | -0.621 | -0.172   | -0.199    | 0.1    | 0.462     | -0.509 | -0.651 |
| A014131_01 |    | -0.573    | -0.389 | -1.319   | -1.259    | 0.177  | 0.523     | -0.462 | -0.359 |
| A014132_01 |    | 0.301 NA  |        | 0.026    | -0.011    | 0.449  | 0.27      | 0.334  | 0.091  |

|            |    |           |           |        |           |        |           |          |        |
|------------|----|-----------|-----------|--------|-----------|--------|-----------|----------|--------|
| A014136_01 |    | -0.222    | -0.393    | -0.186 | -0.296    | -0.198 | -0.275    | 0.139    | 0.124  |
| A014137_01 |    | 0.288     | 0.344     | 0.043  | 0.083     | 0.33   | 0.15      | 0.122    | 0.073  |
| A014139_01 |    | -0.391    | -0.407    | -0.032 | -0.087    | -0.26  | -0.405    | 0.126    | 0.018  |
| A014140_01 |    | -0.06 NA  |           | 0.005  | 0.06      | -0.022 | -0.092    | 0.332    | 0.079  |
| A014141_01 |    | -0.289 NA | NA        |        | -0.221 NA |        | 0.294 NA  |          | 0.216  |
| A014144_01 |    | 0.229     | 0.191     | 0.05   | 0.121     | -0.223 | -0.248    | 0.064    | 0.054  |
| A014146_01 |    | -0.168    | -0.197    | -0.069 | -0.133    | -0.22  | 0.074     | -0.151   | -0.124 |
| A014147_01 |    | 0.211 NA  |           | 0.082  | -0.118 NA |        | -0.701    | -0.056   | -0.219 |
| A014155_01 |    | 0.318     | 0.154     | 0.176  | 0.176     | -0.057 | -0.139 NA | NA       |        |
| A014161_01 |    | 0.133     | 0.138     | -0.142 | -0.03     | -0.169 | -0.317    | 0.094    | -0.079 |
| A014163_01 | NA | NA        |           | -0.485 | -0.57 NA  |        | -0.248    | 0.533    | 0.216  |
| A014165_01 |    | 0.092     | -0.031    | -0.182 | -0.337    | 0.099  | -0.064 NA | NA       |        |
| A014167_01 |    | 0.18 NA   |           | 0.198  | 0.014 NA  | NA     | NA        |          | 0.168  |
| A014168_01 |    | -0.142    | -0.005    | -0.222 | -0.111    | 0.552  | 0.705 NA  |          | -0.04  |
| A014169_01 |    | -0.12     | -0.145    | -0.596 | -0.632    | -0.357 | -0.572    | -0.441   | -0.351 |
| A014174_01 |    | 0.121 NA  |           | 0.512  | 0.197     | 0.361  | 0.209     | 0.146    | 0.063  |
| A014176_01 |    | 0.379     | 0.178     | -0.29  | -0.132    | 0.2    | 0.243     | 0.182    | 0.094  |
| A014177_01 |    | 0.002     | -0.14     | 0.048  | -0.082    | 0.071  | 0.15      | -0.047   | -0.132 |
| A014178_01 | NA |           | -0.078    | 0.077  | 0.09 NA   |        | -0.017    | -0.04 NA |        |
| A014179_01 |    | 0.255     | -0.035    | -0.001 | -0.066    | -0.193 | -0.339 NA |          | -0.203 |
| A014180_01 |    | 0.23 NA   |           | -0.426 | -0.407 NA |        | -0.205    | 0.425    | 0.043  |
| A014182_01 |    | -0.581    | -0.434    | -0.172 | -0.268    | -0.193 | -0.277    | -0.319   | -0.493 |
| A014185_01 |    | 0.001     | -0.119    | -0.015 | 0.012     | -0.058 | 0.033     | 0.048    | 0.038  |
| A014186_01 |    | -0.201    | -0.144    | 0.094  | 0.063     | -0.337 | -0.621    | 0.109    | -0.064 |
| A014188_01 |    | 0.173 NA  | NA        |        | -0.425    | 0.22   | 0.152 NA  | NA       |        |
| A014189_01 |    | -0.297    | -0.39     | 0.113  | 0.095     | 0.538  | 0.621     | 0.18     | -0.011 |
| A014192_01 |    | 0.337     | 0.03      | 0.09   | -0.008    | -0.141 | -0.284    | 0.051    | -0.009 |
| A014194_01 |    | 0.091     | -0.134    | 0.128  | -0.031    | 0.186  | 0.082     | 0.123    | -0.045 |
| A014201_01 |    | -0.288    | -0.122    | -0.233 | -0.244    | 0.138  | 0.248     | -0.055   | -0.166 |
| A014202_01 |    | 0.156     | -0.037    | -0.186 | -0.337    | -0.155 | -0.091    | 0.175    | 0.079  |
| A014203_01 |    | 0.028     | -0.212 NA | NA     |           | -0.321 | -0.483 NA | NA       |        |
| A014204_01 |    | -0.16     | -0.106    | -0.176 | -0.012    | -0.139 | -0.193    | 0.134    | 0.075  |
| A014205_01 |    | 0.235     | 0.272     | 0.698  | 0.585     | 0.326  | 0.134     | -0.246   | -0.373 |
| A014208_01 |    | -0.118    | -0.128    | -0.001 | 0.031     | -0.363 | -0.412    | 0.03 NA  |        |
| A014209_01 |    | 0.23 NA   |           | 0.486  | 0.093     | 0.114  | -0.274 NA |          | -0.423 |
| A014210_01 |    | -0.518 NA |           | -0.168 | -0.482    | 0.578  | 0.636 NA  | NA       |        |
| A014213_01 |    | -0.342    | -0.16     | -0.303 | -0.046    | -1.049 | -0.748    | -0.654   | -0.388 |
| A014224_01 |    | 0.609     | 0.753     | 0.081  | 0.062     | 0.52   | 0.868     | 0.059    | 0.121  |
| A014229_01 |    | 0.145     | 0.297     | -0.062 | 0.014     | -0.119 | -0.325    | 0.134    | 0.096  |
| A014233_01 |    | -0.395    | -0.379    | -0.014 | -0.278    | 0.298  | 0.539     | -0.442   | -0.222 |
| A014239_01 |    | -0.109    | -0.155    | -0.39  | -0.289    | -0.092 | -0.11     | 0.092    | 0.058  |
| A014245_01 |    | 0.338     | -0.045    | -0.083 | -0.219    | 0.273  | 0.23      | 0.094    | -0.109 |
| A014247_01 |    | -1.566 NA | NA        | NA     |           | -1.512 | -1.326 NA | NA       |        |
| A014248_01 |    | 0.171     | 0.056     | -0.135 | -0.154    | -0.048 | -0.073    | 0.145    | -0.071 |
| A014249_01 |    | -0.081    | 0.073     | -0.062 | 0.307     | -0.03  | 0.226     | 0.093    | 0.131  |
| A014250_01 |    | 0.225     | 0.033     | 0.035  | -0.198    | 0.25   | 0.177     | 0.07     | -0.075 |
| A014253_01 |    | 0.346     | 0.295     | 0.057  | 0.17      | -0.035 | -0.16     | 0.175    | 0.245  |
| A014256_01 |    | -0.447    | -0.041    | 0.186  | -0.074    | -0.946 | -1.24     | -0.202   | -0.168 |
| A014257_01 |    | 0.161 NA  |           | 0.047  | 0.013     | 0.2    | 0.106 NA  |          | 0.05   |
| A014264_01 |    | 0.087     | -0.029    | 0.017  | -0.202    | -0.108 | -0.194    | -0.073   | -0.312 |
| A014270_01 |    | 0.28      | 0.032     | -0.097 | -0.134    | 0.269  | 0.363 NA  |          | -0.415 |
| A014274_01 |    | 0.22      | 0.242     | 0.45   | 0.112     | 0.727  | 0.918     | 0.188    | 0.278  |
| A014275_01 |    | -1.373    | -1.341    | -3.125 | -2.471    | -2.743 | -2.444 NA |          | -3.059 |
| A014276_01 |    | 0.224     | 0.307     | -0.154 | -0.271    | 0.22   | 0.121     | -0.005   | -0.025 |
| A014278_01 |    | -0.135    | -0.034    | -0.079 | 0.009     | -0.375 | -0.407    | -0.174   | -0.106 |
| A014286_01 |    | -0.172    | -0.102    | -0.148 | -0.425    | -0.608 | -0.727 NA |          | -0.147 |
| A014293_01 |    | 0.898 NA  |           | 0.506  | 0.44 NA   |        | -0.224    | -0.052   | -0.443 |
| A014295_01 |    | 0.439     | 0.286     | 0.287  | 0.093     | 0.323  | 0.111     | -0.207   | -0.212 |
| A014304_01 |    | 0.694     | 0.54      | 0.544  | 0.487     | 1.115  | 1.19      | 0.623    | 0.498  |
| A014305_01 |    | 0.14      | 0.231     | 0.209  | 0.004     | 0.277  | 0.125     | 0.033    | 0.074  |
| A014307_01 |    | -0.005    | -0.272    | 0.307  | 0.29      | -0.234 | -0.55     | 0.044    | -0.231 |
| A014310_01 |    | 0.216     | 0.019     | 0.412  | 0.101     | -0.209 | -0.502    | -0.464   | -0.494 |
| A014313_01 |    | 0.248     | 0.202     | -0.103 | -0.056    | -0.068 | -0.137    | 0.048    | 0.018  |
| A014317_01 |    | 0.533     | 0.188     | -0.357 | -0.346    | -0.209 | -0.462    | 0.028    | -0.162 |
| A014319_01 |    | -0.165    | -0.132    | -0.176 | -0.415    | 0.015  | 0.223     | 0.035    | 0.182  |
| A014323_01 |    | -0.07     | -0.119    | -0.461 | -0.707    | -0.217 | -0.349 NA | NA       |        |
| A014325_01 |    | 0.253 NA  |           | 0.286  | -0.096    | 0.364  | 0.283 NA  | NA       |        |
| A014331_01 |    | 0.071 NA  |           | -0.068 | -0.274    | 0.192  | 0.163 NA  | NA       |        |

|            |           |          |           |           |        |           |           |        |
|------------|-----------|----------|-----------|-----------|--------|-----------|-----------|--------|
| A014339_01 | 0.024     | -0.223   | -0.094    | -0.118    | -0.146 | -0.14     | -0.217    | -0.254 |
| A014344_01 | 0.095     | 0.174    | -0.101    | -0.091    | 0.306  | 0.245     | 0.339     | 0.5    |
| A014441_01 | 0.351 NA  |          | 0.097     | -0.146 NA | NA     |           | 0.26      | -0.007 |
| A014442_01 | -0.086 NA |          | 0.306     | 0.267     | -0.138 | 0.094     | -0.233 NA |        |
| A014443_01 | 0.504     | 0.185    | -0.02     | -0.174    | -0.017 | -0.242    | 0.105     | -0.001 |
| A014448_01 | 0.18 NA   |          | 0.328     | -0.16     | -0.006 | -0.123 NA |           | 0.178  |
| A014449_01 | -0.393    | -0.08    | -0.179    | -0.062    | -0.358 | -0.112    | -0.283    | -0.122 |
| A014455_01 | 0.348     | 0.291    | 0.569     | 0.322     | -1.636 | -2.1      | -0.054    | -0.16  |
| A014457_01 | NA        | NA       | -0.383    | -0.161 NA |        | 0.157     | 0.113     | 0.065  |
| A014459_01 | 0.067 NA  |          | 0.545     | 0.664     | -0.211 | -0.391    | -0.022    | -0.267 |
| A014462_01 | 0.04      | -0.108   | 0.08      | 0.002     | 0.004  | -0.04     | 0.12      | -0.069 |
| A014463_01 | -0.172    | 0.012    | -0.208    | -0.127    | 0.005  | 0.13      | -0.031    | 0.052  |
| A014464_01 | -2.841    | -1.843   | -1.946    | -1.673    | -2.872 | -3.265    | -2.931    | -2.933 |
| A014468_01 | 0.403     | 0.164    | -0.062    | -0.083    | 0.246  | 0.244     | -0.065    | -0.178 |
| A014469_01 | -0.157    | -0.085   | 0.273     | 0.249     | 0.475  | 0.794     | -0.326    | -0.279 |
| A014472_01 | 0.315     | -0.03    | -0.11     | -0.161    | -0.002 | -0.24     | 0.181     | -0.206 |
| A014473_01 | 0.291     | 0.15     | 0.021     | 0.098     | 0.096  | 0.189     | 0.069     | 0.172  |
| A014474_01 | 0.066     | 0.123    | 0.121     | -0.003    | 0.084  | 0.169     | -0.079    | 0.013  |
| A014486_01 | 0.027     | 0.066    | 0.053     | -0.195    | 0.059  | 0.032 NA  |           | -0.087 |
| A014493_01 | 0.186     | 0.119    | 0.203     | 0.245     | 0.134  | 0.206     | 0.108     | 0.066  |
| A014495_01 | 0.117     | -0.119   | 0.047     | 0.034     | -0.338 | -0.489    | 0.066     | -0.192 |
| A014497_01 | 0.272     | 0.182    | -0.03     | 0.112     | 0.171  | 0.308     | -0.14     | -0.208 |
| A014501_01 | -0.14     | -0.141   | -0.147    | -0.025    | 0.217  | 0.485     | -0.137    | 0.025  |
| A014502_01 | 0.213     | 0.248    | -0.113    | -0.226    | 0.162  | 0.285     | 0.079     | 0.082  |
| A014503_01 | -0.091 NA |          | 0.232     | 0.455     | -0.173 | -0.158    | 0.065     | -0.052 |
| A014509_01 | 0.316     | 0.399 NA | NA        |           | 0.135  | 0.048 NA  | NA        |        |
| A014510_01 | -0.18     | 0.201    | -0.172    | -0.141    | -0.271 | -0.097    | 0.029     | 0.247  |
| A014514_01 | 0.083 NA  |          | -0.222    | -0.014    | -0.073 | -0.263    | 0.121     | -0.259 |
| A014516_01 | 0.297     | 0.012    | 0.13      | -0.044    | -0.142 | -0.362    | 0.182     | 0.056  |
| A014519_01 | 0.503     | 0.354    | 0.084     | 0.063     | 0.212  | 0.214     | 0.846     | 0.753  |
| A014520_01 | -0.174 NA |          | -0.485 NA |           | 0.355  | 0.598 NA  | NA        |        |
| A014522_01 | 0.472     | 0.545    | -0.191    | -0.086    | 0.203  | 0.261     | -0.218    | -0.177 |
| A014526_01 | -0.63     | -0.169   | -0.698    | -0.569    | -1.595 | -1.954    | -0.387    | -0.533 |
| A014529_01 | NA        | NA       | 0.119     | 0.079 NA  |        | -0.284    | 0.185     | 0.011  |
| A014531_01 | -0.328    | -0.057   | 0.062     | 0.087     | -0.524 | -0.272    | -0.382    | -0.302 |
| A014532_01 | 0.192 NA  |          | 0.379     | 0.298     | 0.412  | 0.435     | -0.363    | -0.323 |
| A014537_01 | 0.219     | -0.036   | 0.315     | 0.27      | -0.012 | -0.17     | 0.171     | 0.067  |
| A014539_01 | -0.268    | -0.329   | -0.294    | -0.068    | 0.365  | 0.365     | 0.374     | 0.077  |
| A014543_01 | -0.107    | -0.183   | -0.453    | -0.362    | 0.07   | 0.098     | 0.033     | 0.119  |
| A014544_01 | 0.243     | 0.211    | -0.272    | -0.343    | 0.32   | 0.552     | -0.013    | 0.149  |
| A014548_01 | 0.222 NA  |          | 0.198     | -0.078    | 0.201  | -0.055    | 0.06      | -0.126 |
| A014550_01 | 0.017     | -0.037   | -0.093    | -0.015    | -0.13  | 0.015     | -0.091    | -0.289 |
| A014556_01 | NA        | NA       | 0.079 NA  | NA        |        | 0.051 NA  | NA        |        |
| A014560_01 | 0.247 NA  |          | 0.307     | -0.073    | -0.039 | -0.246 NA |           | -0.375 |
| A014570_01 | 0.131     | 0.161    | 0.05      | 0.205     | -0.301 | -0.339    | -0.121    | -0.218 |
| A014571_01 | 0.158     | 0.374    | -0.091    | -0.005    | 0.54   | 0.772     | 0.257     | 0.335  |
| A014574_01 | 0.081     | 0.275    | 0.278     | 0.101     | -0.198 | -0.169    | -0.071    | -0.062 |
| A014576_01 | 0.123     | 0.121    | 0.373     | 0.261     | -0.01  | -0.226    | -0.157    | -0.282 |
| A014577_01 | -0.781    | -0.551   | -0.01     | -0.008    | -1.344 | -1.3      | -0.776    | -0.713 |
| A014580_01 | 0.058     | -0.067   | 0.278     | 0.018     | -0.262 | -0.421    | 0.082     | -0.171 |
| A014581_01 | -0.562    | -0.19    | -0.092    | 0.093     | -0.149 | 0.314     | -0.304    | -0.307 |
| A014587_01 | -0.122    | 0.181    | -0.039    | 0.189     | 0.145  | 0.44      | 0.063     | 0.291  |
| A014590_01 | 0.139     | 0.158    | 0.036     | -0.068    | 0.283  | 0.213     | 0.142     | -0.006 |
| A014594_01 | -0.207    | -0.037   | 0.037     | -0.247    | 0.108  | 0.133     | -0.151    | -0.049 |
| A014596_01 | -0.142    | -0.048   | 0.271     | 0.205     | -0.777 | -0.861    | 0.055     | 0.129  |
| A014597_01 | 0.366     | 0.288    | 0.141     | 0.131     | -0.141 | -0.183    | -0.066    | -0.225 |
| A014600_01 | -0.082    | -0.167   | 0.222     | -0.068    | -1.081 | -1.377    | 0.092     | -0.15  |
| A014601_01 | 0.055     | 0.057    | -0.042    | 0.188     | -0.207 | -0.322    | 0.135     | 0.08   |
| A014611_01 | -0.242    | -0.221   | -0.08     | -0.144    | 0.691  | 0.989     | -0.255    | -0.279 |
| A014612_01 | 0.02      | 0.053    | 0.102     | 0.171     | 0.336  | 0.496     | -0.161    | -0.091 |
| A014615_01 | -0.394    | -0.37    | -0.256    | -0.249    | -0.939 | -0.999    | -0.21     | -0.098 |
| A014621_01 | -0.022 NA | NA       | NA        | NA        |        | -0.909 NA | NA        |        |
| A014622_01 | 0.286     | 0.068    | -0.058    | 0.02      | 0.235  | 0.209     | 0.36      | 0.105  |
| A014628_01 | -0.214    | -0.106   | 0.124     | -0.006    | 0.005  | -0.022    | -0.216    | -0.129 |
| A014629_01 | 0.065 NA  |          | -0.149    | -0.427 NA |        | -0.627 NA |           | -0.339 |
| A014632_01 | -0.485    | -0.078   | -0.21     | -0.211    | -0.876 | -0.689    | -0.356    | 0.057  |
| A014633_01 | 0.012     | -0.104   | 0.372     | 0.261     | 0.086  | 0.047     | -0.168    | -0.296 |
| A014634_01 | -0.2      | -0.349   | 0.086     | 0.142     | -0.802 | -0.78     | -0.226    | -0.481 |

|            |           |        |          |           |        |           |           |        |
|------------|-----------|--------|----------|-----------|--------|-----------|-----------|--------|
| A014636_01 | -0.041    | 0.038  | -0.267   | -0.158    | -0.218 | -0.151    | -0.12     | -0.027 |
| A014637_01 | 0.274     | 0.074  | 0.242    | 0.354     | -0.16  | -0.085    | -0.2      | -0.413 |
| A014639_01 | -0.089    | 0.013  | -0.232   | -0.289    | -0.068 | -0.135 NA |           | -0.083 |
| A014643_01 | -0.056    | -0.144 | -0.128   | -0.179    | -0.898 | -1.098    | -0.224    | -0.417 |
| A014644_01 | -0.054    | -0.124 | -0.101   | -0.177    | -0.075 | -0.247    | 0.133     | 0.011  |
| A014646_01 | 0.201     | 0.356  | -0.1     | -0.203    | 0.459  | 0.385     | 0.157     | 0.193  |
| A014650_01 | -0.029    | -0.071 | 0.089    | -0.031    | -0.058 | -0.23     | 0.332     | 0.312  |
| A014654_01 | 0.197     | -0.064 | -0.1     | -0.095    | 0.314  | 0.27      | 0.176     | -0.009 |
| A014655_01 | -0.049    | -0.345 | 0.069    | -0.124    | -0.367 | -0.637    | -0.141    | -0.276 |
| A014660_01 | 0.193 NA  | NA     | NA       |           | 0.184  | 0.216 NA  |           | 0.152  |
| A014661_01 | -0.095    | -0.253 | -0.026   | 0.133     | 0.249  | 0.37      | -0.364    | -0.606 |
| A014662_01 | 0.137     | 0.071  | -0.172   | -0.328    | 0.07   | -0.225    | 0.253     | 0.13   |
| A014667_01 | -0.141    | -0.026 | -0.081   | -0.136    | 0.406  | 0.731     | 0.318     | 0.384  |
| A014669_01 | -0.251    | -0.017 | 0.286    | 0.111     | 0.448  | 0.501     | 0.038     | 0.106  |
| A014675_01 | -0.045    | -0.14  | -0.039   | -0.032    | -0.193 | -0.249    | 0.124     | 0.006  |
| A014676_01 | 0.038     | -0.04  | -0.125   | 0.005     | -0.785 | -1.068    | 0.162     | -0.102 |
| A014677_01 | NA        | 0.089  | 0.055    | 0.11 NA   |        | -0.655 NA | NA        |        |
| A014682_01 | 0.244     | 0.39   | -0.033   | 0.246     | -0.103 | -0.05     | 0.159     | 0.114  |
| A014684_01 | 0.3       | 0.022  | 0.099    | -0.134    | 0.235  | -0.024    | -0.026    | -0.041 |
| A014685_01 | 0.077 NA  |        | 0.16     | 0.065     | -0.293 | -0.261 NA |           | -0.015 |
| A014688_01 | 0.266     | 0.773  | 0.432    | 0.418     | -0.922 | -1.239    | -0.712    | -0.766 |
| A014699_01 | -0.049    | -0.082 | 0.083    | -0.044    | -0.304 | -0.504    | -0.12     | -0.3   |
| A014701_01 | -0.298    | 0.238  | 0.197    | 0.054     | 0.254  | 0.321     | 0.055     | 0.109  |
| A014702_01 | 0.188     | 0.166  | 0.619    | 0.448     | 0.494  | 0.541     | -0.14     | -0.073 |
| A014704_01 | 0.229     | 0.153  | 0.02     | 0.112     | -0.613 | -0.83     | 0.221     | 0.275  |
| A014705_01 | 0.49      | 0.509  | -0.64    | -0.569    | 0.683  | 0.775     | -0.059    | -0.069 |
| A014706_01 | 0.354     | -0.042 | 0.362    | 0.047     | -0.366 | -0.707    | 0.01      | -0.196 |
| A014707_01 | -0.229    | -0.059 | -0.087   | -0.005    | -0.142 | -0.248    | 0.159     | 0.047  |
| A014708_01 | 0.134     | -0.152 | 0.138    | 0.019     | -0.058 | -0.118 NA |           | -0.186 |
| A014709_01 | 0.038     | 0.035  | -0.21    | -0.384    | 0.276  | 0.139     | 0.262     | 0.017  |
| A014716_01 | -0.197    | -0.113 | 0.011    | 0.112     | -0.193 | -0.177    | -0.246    | -0.165 |
| A014717_01 | 0.067     | 0.125  | -0.239   | -0.361    | 0.098  | 0.115     | 0.122     | 0.232  |
| A014720_01 | 0.193     | -0.122 | -0.217   | -0.206    | 0.179  | 0.386     | -0.421    | -0.58  |
| A014721_01 | -0.392    | -0.42  | 0.242    | 0.351     | -0.599 | -0.539    | -0.167    | -0.227 |
| A014722_01 | 0.176     | 0.087  | -0.071   | 0.07      | -0.045 | -0.036    | 0.108     | -0.051 |
| A014723_01 | 0.162     | -0.024 | 0.166    | 0.149     | 0.205  | 0.052     | 0.21      | 0.003  |
| A014724_01 | 0.035     | 0.165  | 0.314 NA |           | 0.297  | 0.461 NA  | NA        |        |
| A014725_01 | 0.368     | 0.219  | 0.279    | 0.214     | -0.125 | -0.83     | -0.168    | -0.223 |
| A014726_01 | -0.862    | 0.255  | 0.107    | -0.199    | 0.312  | 0.072 NA  |           | -0.064 |
| A014728_01 | -0.137    | -0.03  | 0.179    | -0.07     | -0.07  | -0.118    | 0.279     | 0.253  |
| A014730_01 | -0.036    | -0.195 | -0.007   | -0.117    | 0.126  | -0.058    | 0.152     | -0.309 |
| A014732_01 | -0.242    | -0.584 | -0.226   | -0.142    | -0.187 | -0.204    | 0.17      | 0      |
| A014733_01 | 0.241     | 0.14   | 0.332    | 0.129     | 0.423  | 0.328     | 0.208     | 0.138  |
| A014738_01 | -0.09     | -0.115 | 0.115    | -0.077    | -0.06  | -0.13     | -0.171    | -0.146 |
| A014742_01 | -0.18     | -0.137 | -0.205   | -0.278 NA |        | -0.266    | 0.278     | 0.354  |
| A014743_01 | 0.165     | 0.215  | 0.083    | -0.134    | 0.067  | -0.151    | -0.066    | -0.025 |
| A014745_01 | 0.224     | 0.367  | -0.052   | 0.012     | 0.042  | 0.167     | -0.112    | 0.046  |
| A014746_01 | -0.216    | -0.046 | 0.351    | 0.181     | 0.327  | 0.728     | -0.007    | 0.338  |
| A014750_01 | -0.36     | -0.401 | -0.182   | -0.366    | -0.616 | -0.69     | -1.114    | -1.072 |
| A014751_01 | -0.338 NA |        | 0.016    | 0.015 NA  |        | 0.185     | 0.054     | -0.145 |
| A014752_01 | 0.343 NA  |        | 0.454    | 0.289 NA  |        | -0.722    | -0.073    | -0.244 |
| A014754_01 | 0.112     | 0.005  | 0.102    | 0.117     | -0.086 | -0.191    | 0.092     | 0.083  |
| A014755_01 | -0.027    | 0.115  | -0.151   | -0.008    | -0.146 | -0.17     | 0.112     | 0.118  |
| A014758_01 | 0.564     | 0.587  | -0.622   | -0.495    | -0.569 | -0.633    | -0.138    | -0.123 |
| A014759_01 | -0.094    | 0.135  | 0.352    | 0.255     | 0.406  | 0.73      | -0.099 NA |        |
| A014760_01 | 0.254     | 0.103  | 0.104    | 0.161     | -0.664 | -0.655    | -0.056    | -0.226 |
| A014761_01 | -0.119    | -0.172 | -0.218   | -0.415    | 0.436  | 0.417     | 0.175     | 0.154  |
| A014762_01 | 0.267     | 0.045  | 0.098    | -0.014    | -0.239 | -0.59     | 0.332     | 0.101  |
| A014763_01 | 0.059     | 0.317  | 0.169    | 0.243     | 0.111  | 0.191     | -0.192    | -0.217 |
| A014765_01 | 0.458     | 0.405  | -0.495   | -0.271    | 0.315  | 0.257     | 0.246     | 0.041  |
| A014767_01 | 0.227     | 0.204  | 0.05     | 0.108     | -0.341 | -0.52     | 0.177     | 0.004  |
| A014769_01 | -0.148    | -0.113 | -0.224   | -0.144    | -0.371 | -0.37     | -0.222    | -0.287 |
| A014771_01 | -0.196    | -0.288 | -0.262   | -0.099    | -1.016 | -1.403    | -0.124    | -0.363 |
| A014774_01 | 0.117     | -0.04  | -0.122   | -0.18     | 0.197  | 0.261     | 0.294     | 0.298  |
| A014777_01 | -0.041    | 0.025  | 0.015    | -0.032    | -0.014 | -0.207    | 0.184     | 0.252  |
| A014780_01 | -0.09     | -0.285 | -0.078   | -0.368    | -0.114 | -0.099    | -0.16     | -0.005 |
| A014783_01 | 0.167     | -0.032 | 0.136    | 0.047     | -0.242 | -0.512    | 0.129     | -0.001 |
| A014785_01 | 0.045 NA  |        | -0.12    | -0.122    | -0.203 | -0.253    | 0.196     | 0.127  |

|            |    |           |           |           |           |        |           |          |        |
|------------|----|-----------|-----------|-----------|-----------|--------|-----------|----------|--------|
| A014789_01 |    | 0.173     | 0.747     | 0.508     | 0.241     | 0.519  | 0.139     | -0.369   | -0.246 |
| A014793_01 |    | 0.211     | 0.506     | 0.288     | -0.069    | 0.14   | -0.059    | 0.019    | -0.03  |
| A014794_01 |    | 0.315     | 0.063     | 0.489     | 0.349     | -0.151 | -0.514    | 0.02     | -0.31  |
| A014798_01 |    | -0.001 NA |           | -0.23     | -0.246    | -0.171 | -0.232    | 0.236    | 0.136  |
| A014799_01 | NA |           | -2.105 NA |           | -1.856 NA |        | NA        | NA       | NA     |
| A014800_01 |    | 0.107     | -0.043    | 0.046     | -0.22     | 0.256  | 0.099     | 0.119    | -0.033 |
| A014801_01 |    | 0.505     | 0.5       | 0.205     | 0.382     | -0.248 | -0.549    | -0.538   | -0.636 |
| A014802_01 |    | 0.443     | -0.036    | 0.058     | -0.014    | -0.22  | -0.416 NA | NA       |        |
| A014805_01 |    | 0.221 NA  |           | 0.373     | 0.073     | -0.39  | -0.761    | -0.217   | -0.114 |
| A014806_01 |    | -0.134    | -0.267    | -0.046    | -0.094    | -0.304 | -0.743    | 0.245    | -0.233 |
| A014811_01 |    | 0.201     | 0.261     | -0.247 NA |           | -0.059 | -0.04 NA  |          | -0.02  |
| A014819_01 |    | -0.204    | -0.282    | -0.293    | 0.051     | -0.232 | -0.272    | 0.162    | -0.07  |
| A014821_01 |    | 0.224     | 0.131     | 0.126     | 0.072     | -0.035 | -0.032    | 0.015    | -0.047 |
| A014825_01 |    | 0.416     | 0.593     | 0.011     | 0.088 NA  |        | -0.274 NA | NA       |        |
| A014832_01 |    | 0.288     | 0.082     | -0.122    | -0.087    | 0.217  | 0.13      | -0.015   | 0.009  |
| A014833_01 |    | 0.12 NA   |           | 0.306     | 0.08 NA   |        | 0.056 NA  |          | -0.026 |
| A014835_01 |    | 0.334     | 0.284     | -0.164    | -0.232    | 0.258  | 0.256 NA  |          | -0.031 |
| A014838_01 |    | -0.258    | -0.254    | -0.231    | -0.234    | -0.031 | -0.091 NA |          | -0.137 |
| A014842_01 |    | 0.009     | 0.097     | 0.073     | 0.199     | 0.286  | 0.345     | -0.023   | 0.106  |
| A014848_01 |    | -0.043 NA |           | 0.278     | 0.205     | 0.054  | -0.14     | -0.109   | -0.273 |
| A014850_01 |    | 0.074     | -0.089    | 0.065     | -0.082    | -0.028 | -0.229    | 0.053    | -0.002 |
| A014851_01 |    | -0.785 NA |           | 0.706     | 0.559 NA  | NA     | NA        | NA       |        |
| A014855_01 |    | -0.028    | -0.022    | -0.022    | -0.294    | 0.03   | -0.008    | 0.328    | 0.142  |
| A014858_01 |    | 0.074     | -0.014    | 0.074     | 0.111     | 0.595  | 0.699     | 0.304    | 0.227  |
| A014860_01 |    | 0.3       | 0.469     | -0.363    | -0.377    | 0.01   | -0.231    | 0.448    | 0.494  |
| A014862_01 |    | 0.237     | 0.193     | -0.227    | -0.128    | 0.222  | 0.261 NA  |          | 0.043  |
| A014867_01 |    | -0.699    | -0.542 NA |           | -1.454 NA |        | -2.29 NA  | NA       |        |
| A014874_01 |    | -0.047 NA |           | -0.112    | -0.063    | -0.14  | -0.16 NA  |          | -0.04  |
| A014875_01 |    | -0.239 NA |           | 0.136     | 0.253 NA  |        | -0.59 NA  |          | 0.175  |
| A014876_01 |    | 0.221     | 0.108     | -0.083    | -0.067    | 0.74   | 0.981     | 0.167    | 0.161  |
| A014888_01 |    | -0.106    | -0.053    | -0.14     | -0.256    | -0.178 | -0.299 NA | NA       |        |
| A014892_01 |    | 0.622 NA  |           | 0.186     | 0.012 NA  | NA     |           | 0.047    | -0.118 |
| A014899_01 |    | -0.002    | 0.001     | 0.154     | 0.223     | 0.263  | 0.448     | -0.023   | 0.148  |
| A014904_01 |    | 0         | -0.096    | -0.032    | -0.181    | -0.361 | -0.508 NA |          | -0.269 |
| A014914_01 |    | -0.214    | -0.276    | -0.105    | 0.05      | -0.161 | -0.199    | 0.022    | -0.108 |
| A014915_01 |    | 0.289 NA  |           | -0.017    | -0.158 NA |        | 0.068     | 0.227    | 0.003  |
| A014919_01 |    | 0.436     | 0.48      | 0.054     | -0.24     | 0.158  | -0.126    | -0.108   | -0.238 |
| A014925_01 |    | 0.004     | -0.043    | 0.118     | 0.078     | -0.116 | -0.183    | -0.267   | -0.324 |
| A014927_01 |    | 0.42      | 0.15      | -0.084    | 0.008     | 0.23   | 0.306     | -0.025   | -0.056 |
| A014928_01 |    | -0.068    | -0.108    | -0.627    | -0.672    | -0.366 | -0.533    | 0.02     | -0.137 |
| A014929_01 |    | -0.354    | -0.18     | 0.046     | 0.145     | 0.279  | 0.43      | 0.138    | 0.095  |
| A014931_01 |    | 0.216     | 0.147     | 0.178     | 0.087     | 0.14   | 0.129     | 0.039    | 0.011  |
| A014932_01 | NA |           | -0.099    | -0.075    | 0.078     | 0.22   | 0.156     | 0.013    | -0.065 |
| A014933_01 |    | -0.116    | -0.126    | -0.048    | 0.094     | -0.062 | -0.202    | 0.074    | -0.076 |
| A014935_01 |    | 0.233     | 0.186     | 0.099     | -0.173    | 0.458  | 0.416 NA  |          | -0.011 |
| A014936_01 |    | 0.87      | 0.708     | -0.022    | 0.139     | -0.118 | -0.356    | 0.034    | 0.074  |
| A014938_01 |    | -0.222    | -0.302    | -0.229    | -0.252    | -0.302 | -0.24     | 0.044    | -0.172 |
| A014939_01 |    | 0.113     | 0.219     | 0.017     | -0.023    | 0.299  | 0.402     | 0.45     | 0.296  |
| A014942_01 |    | 0.207     | 0.088     | -0.08     | -0.088    | -0.069 | -0.025    | -0.13    | -0.383 |
| A014945_01 |    | -0.994    | -0.895    | -0.284    | -0.291    | 0.329  | 0.624     | -0.221   | -0.163 |
| A014947_01 |    | 0.066     | 0.343     | -0.875    | -0.958    | 0.006  | -0.058    | 0.249    | 0.269  |
| A014948_01 |    | -0.583    | -0.335    | -0.324    | -0.248    | 0.098  | 0.412     | 0.032    | 0.048  |
| A014951_01 |    | 0.439     | 0.322     | 0.717     | 0.435     | 0.701  | 0.53      | -0.133   | -0.118 |
| A014952_01 |    | -0.025    | 0.039     | -0.318    | -0.305    | 0.129  | 0.006     | 0.089    | 0.072  |
| A014953_01 |    | 0.499 NA  |           | 0.476     | 0.488 NA  |        | -0.438 NA |          | -0.237 |
| A014954_01 |    | 0.464     | 0.349     | -0.13     | 0.008     | -0.068 | -0.11     | -0.568   | -0.529 |
| A014955_01 |    | 0.162     | 0.113     | -0.066    | -0.033    | 0.193  | 0.229     | 0.172 NA |        |
| A014965_01 |    | -0.061 NA |           | -0.052    | -0.267 NA |        | -0.854 NA | NA       |        |
| A014971_01 |    | 0.211     | -0.029    | 0.078     | 0.096     | 0.333  | 0.267     | 0.058    | -0.043 |
| A014974_01 |    | -0.255    | -0.145 NA | NA        |           | 0.198  | 0.234 NA  | NA       |        |
| A014976_01 |    | 0.022 NA  |           | 0.103     | 0.026     | 0.133  | 0.058 NA  |          | -0.139 |
| A014979_01 |    | 0.068     | 0.163     | 0.053     | -0.141    | -0.192 | -0.065    | 0.11     | 0.253  |
| A014980_01 | NA |           | 0.273     | -0.03     | -0.001 NA |        | -0.058 NA | NA       |        |
| A014982_01 |    | 0.03      | 0.029     | 0.095     | 0.11      | 0.108  | 0.147     | -0.177   | -0.148 |
| A014984_01 |    | 0.596     | 0.637     | -0.47     | -0.436    | 0.172  | -0.06     | 0.272    | 0.506  |
| A014986_01 |    | 0.384     | 0.164     | 0.102     | 0.079     | 0.132  | -0.061    | -0.004   | -0.213 |
| A014989_01 |    | -0.006    | -0.087    | -0.554    | -0.523    | -0.042 | -0.066    | -0.018   | 0.042  |
| A014991_01 |    | 0.421     | 0.383     | 0.292     | 0.392     | 0.297  | 0.335     | -0.011   | -0.013 |

|            |    |           |        |           |           |        |           |        |        |
|------------|----|-----------|--------|-----------|-----------|--------|-----------|--------|--------|
| A014996_01 |    | -0.091    | 0.054  | 0.145     | -0.129    | 0.364  | 0.441     | 0.113  | -0.009 |
| A015002_01 |    | -0.033    | -0.103 | -0.209    | 0.046     | -0.247 | -0.074    | -0.221 | -0.371 |
| A015008_01 |    | 0.27      | 0.378  | 0.219     | 0.045     | 0.078  | -0.015    | -0.069 | -0.046 |
| A015009_01 |    | 0.337     | 0.12   | -0.027    | -0.108    | 0.143  | 0.22      | 0.101  | -0.114 |
| A015011_01 |    | 0.102 NA  |        | 0.012     | -0.111    | 0.272  | 0.366 NA  |        | -0.119 |
| A015012_01 |    | -0.196    | -0.212 | -0.218    | -0.011    | -0.135 | -0.041    | 0.112  | 0.044  |
| A015013_01 |    | -0.057    | 0.189  | -0.382    | -0.122    | 0.215  | 0.693     | -0.007 | 0.234  |
| A015025_01 |    | 0.301     | 0.043  | 0.406     | 0.094     | 0.247  | 0.099     | -0.176 | -0.484 |
| A015035_01 |    | 0.148 NA  |        | 0.206     | 0.278 NA  |        | -0.749 NA |        | -0.186 |
| A015041_01 |    | 0.031     | -0.02  | 0.411     | -0.014    | -0.244 | -0.458 NA |        | -0.135 |
| A015042_01 |    | 0.268 NA  |        | -0.073    | 0.104     | -0.176 | -0.298    | 0.167  | 0.095  |
| A015044_01 |    | -0.056    | -0.109 | -0.056    | -0.228    | -0.078 | -0.133    | -0.015 | 0.078  |
| A015047_01 |    | 0.107     | 0.24   | 0.3       | 0.142     | -0.176 | -0.234    | -0.503 | -0.502 |
| A015050_01 |    | -0.095    | -0.182 | 0.256     | 0.245     | 0.335  | 0.44      | -0.233 | -0.178 |
| A015054_01 |    | 0.372 NA  |        | 0.123     | -0.041 NA |        | -0.556    | 0.142  | -0.098 |
| A015056_01 |    | 0.064     | 0.087  | -0.208    | -0.182    | -0.165 | -0.195    | -0.117 | -0.139 |
| A015062_01 |    | 0.036     | 0.208  | -0.074    | -0.101    | -0.374 | -0.438    | -0.341 | -0.134 |
| A015066_01 |    | -0.175    | -0.337 | -0.024    | 0.203     | 0.045  | 0.289     | -0.034 | -0.092 |
| A015067_01 |    | 0.2 NA    |        | 0.025     | 0.11 NA   |        | -0.045 NA | NA     |        |
| A015071_01 |    | -0.415    | -0.106 | 0.182     | -0.143    | 0.834  | 1.382     | 0.245  | 0.12   |
| A015072_01 |    | -0.266    | -0.366 | -0.267    | -0.346    | -0.856 | -1.006    | -0.18  | -0.174 |
| A015075_01 |    | 0.036     | 0.137  | 0.289     | 0.357     | -0.23  | -0.393    | 0.127  | 0.118  |
| A015077_01 |    | 0.133     | 0.12   | 0.049     | -0.076    | -0.391 | -0.65     | -0.054 | -0.195 |
| A015079_01 |    | 0.347 NA  |        | 0.303     | 0.168 NA  |        | -0.117    | 0.144  | -0.114 |
| A015081_01 | NA | NA        |        | 0.213     | 0.15 NA   |        | 0.061     | 0.081  | 0.019  |
| A015082_01 |    | -0.242 NA |        | 0.047     | 0.066     | 0.361  | 0.329     | 0.133  | 0.029  |
| A015083_01 |    | 0.326     | 0.131  | 0.008     | 0.065     | 0.046  | 0.07      | -0.064 | -0.108 |
| A015084_01 |    | 0.299     | 0.299  | 0.323     | 0.103     | 0.312  | 0.337     | -0.091 | -0.098 |
| A015088_01 |    | 0.265     | 0.365  | -0.02     | 0.036     | -0.014 | 0.001     | -0.128 | -0.004 |
| A015090_01 |    | 0.226 NA  |        | -0.073    | -0.005    | -0.583 | -0.746    | -0.057 | -0.107 |
| A015092_01 |    | 0.122     | 0.062  | -0.109    | 0.083     | 0.292  | 0.478     | -0.041 | -0.095 |
| A015093_01 |    | -0.095    | -0.227 | -0.096    | -0.086    | -0.127 | 0.074     | -0.254 | -0.058 |
| A015095_01 |    | -2.151 NA |        | -0.167    | -0.393 NA |        | -2.325    | -1.033 | -0.825 |
| A015096_01 |    | 0.115     | -0.005 | -0.009 NA |           | 0.385  | 0.293 NA  |        | 0.015  |
| A015097_01 |    | -0.079    | -0.133 | -0.191    | -0.151    | -0.045 | 0.034     | 0.039  | -0.133 |
| A015098_01 |    | 0.171 NA  |        | -0.205 NA | NA        |        | 0.296 NA  |        | 0.232  |
| A015102_01 |    | 0.645     | 0.212  | 0.311     | 0.162     | 0.208  | 0.055     | -0.248 | -0.656 |
| A015105_01 |    | 0.203     | 0.001  | -0.309    | -0.095    | 0.554  | 0.854     | 0.085  | -0.01  |
| A015108_01 |    | -0.136    | -0.261 | 0.111     | 0.077     | -0.393 | -0.507    | -0.116 | -0.269 |
| A015109_01 |    | -0.062 NA |        | 0.084     | -0.011 NA | NA     |           | -0.301 | -0.445 |
| A015111_01 | NA | NA        |        | 0.102     | -0.221 NA | NA     | NA        |        | -0.142 |
| A015114_01 |    | 0.455     | 0.198  | -0.461    | -0.459    | -0.563 | -0.742    | 0.19   | 0.089  |
| A015118_01 |    | 0.175     | 0.024  | -0.194    | -0.231    | 0.053  | 0.132     | 0.16   | 0.06   |
| A015121_01 |    | -0.014 NA |        | -0.085 NA | NA        |        | -0.468 NA | NA     |        |
| A015124_01 |    | -0.024    | 0.033  | 0.04      | 0.151     | 0.193  | 0.394     | 0.025  | -0.011 |
| A015125_01 |    | -0.08     | -0.222 | 0.064     | -0.183    | -0.282 | -0.272    | 0.031  | -0.015 |
| A015126_01 | NA | NA        |        | 0.613     | 0.272 NA  | NA     |           | -0.334 | -0.268 |
| A015128_01 |    | 0.048     | 0.308  | 0.281     | 0.162 NA  |        | -0.604 NA | NA     |        |
| A015129_01 |    | -0.234    | -0.072 | -0.131    | -0.002    | 0.036  | 0.136     | 0.025  | 0.035  |
| A015134_01 |    | 0.341     | 0.324  | 0.023     | 0.247     | 0.751  | 0.91      | 0.18   | -0.06  |
| A015141_01 |    | -0.062    | -0.345 | -0.014    | -0.216    | -0.174 | -0.106    | -0.1   | -0.031 |
| A015144_01 |    | -0.109    | 0.011  | 0.476     | 0.167     | -0.173 | -0.015    | -0.308 | -0.069 |
| A015147_01 |    | 0.073 NA  | NA     | NA        | NA        |        | -0.592 NA |        | -0.108 |
| A015148_01 |    | 0.224     | 0.049  | -0.2      | -0.248    | 0.075  | 0.122     | 0.212  | 0.165  |
| A015149_01 |    | 0.052 NA  |        | -0.105    | -0.075    | -0.006 | -0.065    | 0.125  | 0.087  |
| A015157_01 |    | -0.414    | -0.591 | -0.203    | -0.063    | -0.011 | 0.209     | 0.401  | 0.415  |
| A015160_01 |    | 0.206     | -0.024 | -0.291    | 0.187     | -0.203 | 0.019 NA  |        | 0.05   |
| A015163_01 |    | 0.024 NA  |        | -0.082    | 0.088     | 0.188  | 0.334     | -0.047 | 0.181  |
| A015165_01 |    | 0.122     | 0.131  | 0.063     | 0.244     | 0.382  | 0.467     | 0.163  | 0.105  |
| A015167_01 |    | 0.424 NA  |        | 0.342     | 0.21 NA   |        | -0.91     | -0.181 | -0.288 |
| A015168_01 |    | 0.262     | 0.192  | -0.094    | -0.06     | 0.216  | 0.123     | 0.007  | -0.085 |
| A015171_01 |    | 0.218 NA  |        | 0.228     | 0.248 NA  | NA     |           | 0.126  | -0.02  |
| A015181_01 |    | -0.174    | -0.323 | -0.193    | -0.354    | -0.467 | -0.635    | -0.018 | -0.194 |
| A015182_01 |    | 0.334     | 0.325  | -0.13     | 0.024     | 0.658  | 0.902     | 0.087  | -0.039 |
| A015183_01 |    | 0.061 NA  |        | 0.205     | -0.044 NA | NA     |           | 0.37   | 0.116  |
| A015185_01 |    | 0.085     | 0.086  | -0.108    | -0.037    | 0.041  | -0.046    | -0.12  | -0.123 |
| A015187_01 |    | -0.008 NA |        | -0.239    | -0.234    | -0.08  | -0.045    | 0.371  | 0.373  |
| A015190_01 |    | 0.265 NA  | NA     | NA        |           | -0.209 | -0.418 NA |        | -0.16  |

|            |           |         |           |           |        |           |        |        |
|------------|-----------|---------|-----------|-----------|--------|-----------|--------|--------|
| A015196_01 | -0.083    | -0.223  | 0.092     | -0.065    | -0.191 | -0.268    | 0.128  | 0.194  |
| A015197_01 | 0.101 NA  |         | -0.24     | -0.299    | 0.181  | 0.236     | 0.287  | 0.302  |
| A015199_01 | 0.11 NA   | NA      | NA        |           | -0.04  | -0.084 NA | NA     |        |
| A015203_01 | -0.008    | -0.222  | 0.036     | 0.021     | -0.842 | -0.983    | -0.144 | -0.153 |
| A015220_01 | 0.296     | 0.111   | 0.342     | 0.139     | 0.186  | -0.006    | -0.027 | -0.177 |
| A015223_01 | 0.031     | 0.186   | -0.021    | -0.18     | 0.236  | 0.297     | 0.15   | 0.098  |
| A015232_01 | 0.005     | 0.006   | -0.214    | -0.095    | 0.275  | 0.221     | 0.278  | 0.123  |
| A015235_01 | -0.125    | -0.6 NA |           | -0.265    | -1.369 | -1.852 NA | NA     |        |
| A015236_01 | -0.023    | -0.134  | -0.204    | -0.238    | -0.169 | -0.308    | 0.126  | 0.051  |
| A015237_01 | -0.294    | 0.027   | -0.021    | 0.029     | -0.611 | -0.654    | -0.086 | -0.018 |
| A015239_01 | 0.03      | 0.056   | -0.176    | -0.263    | 0.007  | 0.097     | -0.121 | -0.026 |
| A015240_01 | -0.092 NA |         | -0.144    | 0.019 NA  |        | -0.718    | -0.131 | -0.167 |
| A015243_01 | 0.321     | 0.151   | 0.134     | -0.012    | 0.367  | 0.354     | 0.22   | 0.165  |
| A015246_01 | 0.276 NA  |         | 0.161     | 0.087 NA  | NA     | NA        | NA     |        |
| A015249_01 | 0.384     | 0.418   | 0.03      | 0.059     | 0.447  | 0.678     | -0.015 | -0.015 |
| A015251_01 | -0.25     | -0.057  | -0.241    | -0.417    | -0.09  | 0.204     | -0.112 | -0.048 |
| A015257_01 | 0.13      | 0.11    | 0.524     | 0.374     | -0.12  | -0.271    | -0.028 | -0.111 |
| A015260_01 | 0.336     | 0.142   | 0.443     | 0.394     | 0.375  | 0.477     | 0.096  | 0.026  |
| A015263_01 | 0.417     | 0.463   | -0.137    | -0.032    | -1.194 | -1.675    | 0.026  | 0.014  |
| A015264_01 | 0.252 NA  |         | 0.072     | 0.34 NA   |        | -0.734 NA |        | -0.28  |
| A015265_01 | -0.061    | -0.108  | 0.439     | 0.135     | -0.027 | -0.189    | 0.005  | -0.195 |
| A015266_01 | 0.135 NA  |         | 0.347     | 0.188 NA  | NA     | NA        |        | -0.048 |
| A015267_01 | 0.314 NA  |         | -0.6      | -0.299    | 0.127  | 0.001     | 0.136  | -0.054 |
| A015269_01 | -0.031    | 0.094   | 0.157     | -0.024    | 0.094  | 0.149     | -0.026 | 0.232  |
| A015271_01 | 0.272     | 0.031   | -0.015    | -0.207    | 0.284  | 0.151     | 0.235  | 0.008  |
| A015272_01 | -0.073    | 0.005   | -0.163    | -0.179    | 0.123  | 0.131     | -0.041 | -0.141 |
| A015279_01 | -0.239    | -0.157  | -0.436    | -0.258    | -0.526 | -0.568    | -0.394 | -0.466 |
| A015281_01 | 0.332     | 0.146   | -0.192    | -0.361    | 0.946  | 1.146 NA  | NA     |        |
| A015283_01 | 0.058     | 0.188   | 0.111     | 0.231     | -0.062 | -0.121    | -0.034 | 0.023  |
| A015284_01 | 0.106     | 0.165   | -0.101    | -0.04     | 0.166  | 0.208     | 0.127  | 0.192  |
| A015285_01 | 0.428     | 0.05    | 0.183     | -0.176    | 0.113  | -0.19     | -0.115 | -0.446 |
| A015286_01 | -0.248    | -0.048  | -0.12     | -0.072    | -0.931 | -0.746    | -0.387 | -0.133 |
| A015294_01 | -0.046 NA |         | 0.301     | 0.114 NA  |        | -0.336    | -0.014 | -0.115 |
| A015296_01 | 0.373     | 0.191   | -0.015    | -0.136    | 0.301  | 0.091     | 0.072  | -0.103 |
| A015301_01 | -0.033 NA |         | 0.135     | -0.043    | 0.55   | 0.366 NA  | NA     |        |
| A015302_01 | -0.031    | -0.124  | -0.443    | -0.101    | -1.264 | -1.266    | -0.214 | -0.259 |
| A015313_01 | 0.162     | -0.155  | -0.575    | -0.53     | -0.302 | -0.284    | 0.118  | -0.121 |
| A015314_01 | -0.039    | 0.054   | 0.233     | 0.055     | 0.075  | -0.206    | 0.072  | -0.058 |
| A015319_01 | 0.163     | 0.181   | -0.214    | -0.166    | 0.122  | 0.268     | 0.301  | 0.193  |
| A015320_01 | 0.016 NA  | NA      | NA        |           | 0.162  | 0.228 NA  | NA     |        |
| A015321_01 | 0.425     | 0.106   | 0.152     | 0.071     | 0.087  | -0.107    | -0.407 | -0.494 |
| A015323_01 | 0.091     | 0.019   | -0.047    | 0.209     | -0.369 | -0.317    | 0.145  | -0.206 |
| A015331_01 | -0.046    | 0.008   | -0.189    | -0.189    | -0.471 | -0.542    | -0.275 | -0.21  |
| A015336_01 | 0.294     | 0.197   | -0.495    | -0.268    | -0.066 | -0.033    | 0.061  | 0      |
| A015339_01 | -0.801    | -0.759  | -0.44     | -0.404    | 0.498  | 0.991     | -0.175 | -0.21  |
| A015345_01 | -1.671    | -1.236  | -1.501    | -1.477    | -1.603 | -1.842    | -2.702 | -2.779 |
| A015349_01 | 0.091     | -0.057  | -0.031    | -0.335    | 0.294  | 0.208     | 0.07   | 0.058  |
| A015351_01 | 0.102     | 0.41    | -0.466    | -0.377    | 0.629  | 0.786     | -0.03  | 0.085  |
| A015356_01 | -0.242 NA |         | 0.072     | 0.031     | -0.268 | 0.253 NA  |        | 0.172  |
| A015357_01 | -0.09     | -0.137  | -0.067 NA |           | -0.152 | -0.163 NA |        | 0.158  |
| A015360_01 | 0.121     | 0.105   | -0.65     | -0.551    | 0.417  | 0.337     | 0.516  | 0.514  |
| A015361_01 | 0.198 NA  |         | -0.11     | -0.151    | 0.203  | 0.086     | 0.092  | 0.098  |
| A015368_01 | 0.01      | 0.118   | -0.201    | -0.295    | 0.164  | 0.259     | 0.025  | 0.09   |
| A015378_01 | 0.003     | 0.273   | 0.143     | 0.174     | 0.255  | 0.469     | 0.026  | 0.159  |
| A015380_01 | -0.522    | -0.517  | -0.11     | -0.102    | 0.372  | 0.664     | 0.415  | 0.307  |
| A015388_01 | -0.004    | -0.191  | -0.1      | -0.067    | -0.186 | -0.269    | 0.068  | -0.131 |
| A015394_01 | 0.443     | 0.402   | 0.12      | 0.266     | 0.179  | 0.106     | -0.058 | -0.2   |
| A015397_01 | -0.024 NA | NA      |           | -0.347    | 0.073  | -0.077 NA |        | 0.083  |
| A015404_01 | 0.063     | 0.069   | -0.197    | -0.072    | -0.419 | -0.409    | -0.066 | -0.144 |
| A015414_01 | 0.276 NA  |         | -0.06     | -0.315    | -0.056 | -0.141    | 0.066  | -0.046 |
| A015422_01 | 0.151     | -0.051  | 0.296     | 0.218     | 0.486  | 0.693     | 0.036  | -0.105 |
| A015423_01 | 0.482     | 0.034   | -0.07     | -0.025    | 0.002  | -0.109    | 0.272  | -0.179 |
| A015431_01 | -0.073    | 0.161   | -0.12     | -0.09     | 0.695  | 0.874     | 0.127  | 0.32   |
| A015432_01 | 0.306     | 0.208   | 0.212     | 0.202     | -0.26  | -0.323    | -0.031 | -0.13  |
| A015434_01 | NA        | NA      | -0.028    | -0.141    | -0.28  | -0.26     | 0.064  | -0.042 |
| A015435_01 | -0.227 NA |         | 0.044     | -0.061 NA | NA     |           | -0.029 | 0.092  |
| A015439_01 | -0.209    | -0.202  | -0.393    | -0.435    | 0.287  | 0.451     | 0.402  | 0.417  |
| A015442_01 | 0.075 NA  | NA      | NA        |           | 0.335  | 0.219 NA  | NA     |        |



|            |           |        |           |           |        |           |        |        |
|------------|-----------|--------|-----------|-----------|--------|-----------|--------|--------|
| A015444_01 | -0.015    | -0.341 | 0.028     | -0.036    | -0.249 | -0.287    | 0.142  | -0.203 |
| A015445_01 | 0.275     | 0.254  | 0.068     | 0.004     | 0.23   | 0.195     | 0.132  | 0.161  |
| A015446_01 | 0.476     | 0.38   | -0.677    | -0.677    | -0.158 | -0.109    | -0.62  | -0.505 |
| A015447_01 | 0.433     | 0.316  | -0.426    | -0.23     | -0.027 | 0.197     | -0.069 | -0.045 |
| A015448_01 | 0.155     | -0.159 | 0.076     | -0.039    | 0.521  | 0.66      | 0.084  | 0.058  |
| A015450_01 | 0.244     | 0.118  | 0.145     | 0.022     | 0.062  | -0.151    | 0.201  | -0.055 |
| A015453_01 | -0.33     | -0.289 | -0.074    | -0.044    | -0.544 | -0.28     | -0.184 | -0.153 |
| A015454_01 | 0.241     | -0.017 | 0.442     | 0.336     | 0.528  | 0.368 NA  |        | -0.123 |
| A015455_01 | -0.05 NA  |        | -0.265    | -0.223 NA |        | -0.405    | 0.094  | -0.099 |
| A015457_01 | 0.297     | 0.147  | -0.043    | -0.03     | 0.06   | -0.103    | 0.141  | -0.068 |
| A015458_01 | -0.138    | -0.276 | 0.002     | -0.203    | -0.325 | -0.518    | -0.245 | -0.262 |
| A015462_01 | 0.14      | -0.16  | -0.023    | -0.091    | 0.076  | -0.025    | 0.115  | -0.223 |
| A015463_01 | -0.751 NA |        | -0.894    | -0.694    | -0.645 | -0.7      | -0.522 | -0.543 |
| A015464_01 | -0.235 NA |        | -0.148    | -0.226    | -0.655 | -1.02 NA  |        | -0.956 |
| A015465_01 | 0.093     | 0.075  | 0.252     | 0.062     | -0.496 | -0.678    | -0.26  | -0.223 |
| A015466_01 | 0.355     | 0.358  | 0.197     | 0.186     | 0.137  | 0.114     | -0.149 | -0.197 |
| A015472_01 | -0.177    | -0.322 | -0.046    | -0.324    | -0.605 | -0.605 NA | NA     |        |
| A015473_01 | -0.156    | -0.218 | -0.155    | -0.256    | -0.211 | -0.098    | 0.159  | 0.1    |
| A015474_01 | -0.161    | -0.326 | 0.02      | -0.138    | 0.201  | 0.271     | 0.37   | 0.246  |
| A015475_01 | -0.015 NA |        | 0.265 NA  |           | -0.379 | -0.571 NA | NA     |        |
| A015477_01 | 0.064 NA  |        | 0.05      | -0.005    | 0.164  | 0.195     | -0.145 | -0.092 |
| A015481_01 | -0.126    | -0.104 | -0.095    | -0.077    | -0.043 | 0.068     | 0.18   | 0.052  |
| A015483_01 | -0.099    | -0.335 | -1.974    | -1.953    | 0.47   | 0.664     | -0.751 | -0.92  |
| A015484_01 | -0.106    | -0.086 | -0.328    | -0.186    | -0.906 | -0.895    | -0.611 | -0.473 |
| A015487_01 | 0.148     | 0.131  | -0.047    | -0.239    | 0.297  | 0.268 NA  |        | 0.029  |
| A015490_01 | 0.199 NA  |        | 0.135     | -0.033 NA |        | 0.022     | 0.392  | 0.021  |
| A015492_01 | -1.707    | -1.557 | -0.091    | -0.167    | -1.204 | -1.165    | -1.282 | -1.365 |
| A015493_01 | -0.116 NA |        | 0.285     | 0.148 NA  | NA     | NA        |        | -0.309 |
| A015498_01 | 0.225     | 0.407  | -0.374    | -0.519    | 0.457  | 0.587     | -0.045 | -0.074 |
| A015504_01 | 0.528     | 0.506  | -0.34     | -0.309    | 0.422  | 0.428     | -0.005 | -0.199 |
| A015505_01 | NA        | NA     | 0.222     | 0.212     | -0.169 | -0.282 NA |        | -0.411 |
| A015508_01 | 0.33 NA   |        | -0.28     | -0.283    | 0.678  | 0.571     | 0.35   | 0.235  |
| A015510_01 | 0.152     | 0.429  | 0.003     | -0.007    | 0.311  | 0.611     | 0.051  | 0.215  |
| A015511_01 | 0.524 NA  |        | -0.002    | -0.023    | 0.024  | 0.061 NA  | NA     |        |
| A015513_01 | 0.152     | 0.172  | -0.161    | -0.277    | 0.128  | 0.221     | 0.134  | 0.235  |
| A015519_01 | 0.286     | 0.287  | 0.08      | -0.08     | -0.009 | -0.186    | -0.034 | -0.051 |
| A015522_01 | 0.107     | -0.235 | -0.069    | -0.253    | -0.103 | -0.285    | 0.27   | -0.096 |
| A015523_01 | 0.251     | 0.234  | 0.264     | 0.067     | 0.042  | 0.008     | -0.062 | -0.095 |
| A015524_01 | -0.471    | -0.411 | 0.071     | 0.027     | -0.443 | -0.522    | -0.044 | 0.05   |
| A015530_01 | -0.045    | -0.126 | 0.047     | 0.082     | -0.421 | -0.689    | 0.239  | -0.019 |
| A015534_01 | 0.138     | 0.112  | 0.028     | -0.411    | 0.521  | 0.704     | 0.291  | 0.6    |
| A015536_01 | -0.364    | -0.332 | 0.066     | -0.095    | -0.081 | 0.047     | -0.107 | -0.022 |
| A015539_01 | -0.132    | -0.106 | -0.471    | -0.342    | -0.094 | 0.174     | -0.186 | -0.031 |
| A015540_01 | 0.879     | 0.885  | 0.085     | 0.085     | 0.318  | 0.412     | 0.277  | 0.371  |
| A015543_01 | 0.245     | 0.031  | -0.427    | -0.485    | 0.047  | 0.207     | -0.373 | -0.338 |
| A015548_01 | 0.068     | 0.325  | 0.025     | 0.078     | 0.05   | 0.143     | -0.287 | -0.039 |
| A015550_01 | 0.267     | 0.006  | -0.105    | 0.103     | 0.024  | 0.09      | 0.063  | -0.169 |
| A015558_01 | 0.406     | 0.446  | 0.244     | -0.11     | -0.339 | -0.587    | -0.106 | -0.053 |
| A015563_01 | 0.042 NA  |        | -0.03     | -0.12 NA  | NA     | NA        |        | -0.063 |
| A015571_01 | -0.122 NA |        | 0.044 NA  |           | 0.034  | 0.115     | 0.422  | 0.225  |
| A015576_01 | -0.191 NA |        | -0.231    | -0.014    | -0.024 | -0.103    | -0.051 | -0.003 |
| A015578_01 | -0.031 NA |        | 0.096     | 0.093 NA  |        | 0.217 NA  |        | -0.21  |
| A015579_01 | 0.002     | 0.052  | 0.058     | -0.301    | -0.256 | -0.395    | -0.007 | -0.069 |
| A015585_01 | -0.132    | -0.33  | -0.1      | -0.098    | -0.425 | -0.545    | -0.244 | -0.306 |
| A015586_01 | -0.208    | -0.217 | -0.008    | -0.229    | -0.556 | -0.511 NA |        | -0.242 |
| A015587_01 | 0.253     | 0.174  | 0.19      | -0.069    | 0.1    | 0.095     | -0.167 | -0.191 |
| A015591_01 | 0.11      | 0.262  | 0.068     | 0.187     | 0.225  | 0.597     | 0.131  | 0.116  |
| A015595_01 | -0.055    | -0.077 | -0.291    | -0.332    | 0.473  | 0.673     | 0.018  | 0.06   |
| A015599_01 | -0.221 NA |        | 0.298     | 0.093     | -0.779 | -0.866    | -0.141 | -0.041 |
| A015600_01 | -0.192 NA |        | 0.216     | 0.042 NA  | NA     | NA        |        | -0.249 |
| A015605_01 | -0.031    | -0.058 | 0.281     | -0.073    | -0.137 | -0.26 NA  | NA     |        |
| A015607_01 | 0.113     | 0.178  | -0.142    | -0.26     | 0.248  | 0.476     | -0.002 | 0.119  |
| A015608_01 | 0.586     | 0.765  | -0.637    | -0.41     | 0.26   | 0.364     | -0.648 | -0.417 |
| A015613_01 | -0.148    | -0.267 | 0.119     | 0.122     | -0.533 | -0.805    | -0.003 | -0.203 |
| A015616_01 | 0.294 NA  |        | -0.031 NA |           | 0.044  | -0.065 NA |        | -0.018 |
| A015617_01 | 0.26      | 0.36   | -0.068    | -0.198    | 0.198  | 0.163     | 0.078  | 0.127  |
| A015619_01 | -0.057    | 0.161  | -0.047    | -0.393    | 0.073  | 0.15 NA   |        | 0.036  |
| A015625_01 | 0.031 NA  |        | 0.104     | -0.013 NA |        | -0.3 NA   | NA     |        |

|            |           |        |           |           |        |           |         |        |
|------------|-----------|--------|-----------|-----------|--------|-----------|---------|--------|
| A015629_01 | 0.138     | 0.376  | -0.109    | -0.16     | 0.072  | 0.201     | -0.228  | 0.222  |
| A015634_01 | -0.512    | -0.426 | -0.02     | 0.051     | -0.146 | 0.001     | -0.192  | -0.256 |
| A015635_01 | -0.155 NA |        | 0.233 NA  | NA        |        | 0.057 NA  | NA      |        |
| A015637_01 | 0.146 NA  |        | 0.149     | -0.111 NA |        | 0.196 NA  | NA      |        |
| A015638_01 | 0.069 NA  |        | 0.171     | -0.006 NA |        | 0.259 NA  | NA      |        |
| A015639_01 | 0.312     | 0.356  | 0.522     | 0.39      | 0.656  | 0.663     | -0.164  | -0.161 |
| A015641_01 | 0         | -0.023 | -0.272    | -0.086    | 0.343  | 0.646     | 0.391   | 0.149  |
| A015643_01 | 0.289 NA  |        | 0.192     | 0.112     | 0.205  | 0.076 NA  |         | -0.2   |
| A015645_01 | 0.077     | 0.09   | 0.115     | 0.152     | -0.091 | -0.091 NA | NA      |        |
| A015646_01 | -0.21     | 0.083  | -0.241    | -0.289    | 0.093  | 0.153     | -0.003  | 0.2    |
| A015647_01 | 0.054     | 0.108  | -0.047    | -0.345    | 0.264  | 0.29 NA   |         | -0.161 |
| A015648_01 | 0.057     | 0.261  | 0.213     | 0.124     | 0.063  | 0.068     | -0.129  | -0.133 |
| A015649_01 | 0.26      | 0.237  | 0.116     | 0.063     | 0.272  | 0.296 NA  |         | 0.059  |
| A015650_01 | -0.015    | 0.03   | 0.117     | 0.073 NA  |        | -0.053    | -0.009  | -0.205 |
| A015651_01 | -0.053    | 0.005  | -0.261    | -0.263    | 0.408  | 0.533     | 0.423   | 0.401  |
| A015653_01 | 0.527 NA  |        | 0.277     | 0.219     | 0.546  | 0.305     | 0.189   | -0.091 |
| A015654_01 | 0.364     | 0.199  | 0.123     | 0.052     | 0.294  | 0.17 NA   | NA      |        |
| A015658_01 | 0.07      | 0.123  | 0.109     | 0.046     | 0.498  | 0.554     | 0.144   | 0.044  |
| A015659_01 | -0.171 NA |        | 0.082 NA  |           | 0.259  | 0.28 NA   | NA      |        |
| A015660_01 | -0.139    | 0.151  | 0         | 0.049     | -0.024 | 0.149     | -0.383  | -0.269 |
| A015662_01 | -0.175 NA |        | -0.008    | -0.257    | -0.13  | -0.325    | -0.049  | -0.138 |
| A015663_01 | -0.165    | -0.23  | -0.053    | -0.306    | -0.415 | -0.353    | 0.063   | 0.04   |
| A015665_01 | -0.091 NA |        | -0.001    | -0.108    | 0.219  | 0.214 NA  |         | 0.024  |
| A015667_01 | -0.168    | -0.27  | -0.446    | -0.607    | 0.007  | 0.201     | -0.163  | -0.166 |
| A015668_01 | 0.149     | 0.167  | -0.089    | -0.111    | -0.112 | -0.167    | -0.142  | -0.519 |
| A015673_01 | 0.003     | -0.043 | -0.14     | -0.149    | -0.115 | -0.131    | 0.103   | -0.134 |
| A015678_01 | 0.087     | 0.199  | 0.044     | -0.063    | -0.045 | -0.075    | -0.148  | -0.124 |
| A015679_01 | 0.263     | 0.256  | -0.07     | -0.02     | 0.305  | 0.487     | 0.012   | -0.048 |
| A015692_01 | 0.468     | 0.358  | -0.001    | -0.135    | 0.052  | 0.082 NA  |         | 0.567  |
| A015697_01 | -0.178    | -0.175 | 0.05      | -0.016    | 0.072  | 0.196     | 0.056   | -0.219 |
| A015703_01 | 0.306     | -0.095 | -0.111    | 0.01      | -0.263 | -0.289 NA | NA      |        |
| A015705_01 | -0.099    | 0.327  | 0.071     | 0.012     | -0.009 | 0.236     | -0.082  | 0.424  |
| A015707_01 | 0.361     | 0.297  | 0.065     | 0.035     | 0.466  | 0.407     | 0.196   | 0.232  |
| A015713_01 | -0.086 NA |        | -0.351    | -0.299 NA |        | -0.124    | 0.442   | 0.087  |
| A015716_01 | 0.27      | 0.131  | 0.135     | 0.057     | 0.431  | 0.153     | 0.22 NA |        |
| A015723_01 | -0.101    | -0.115 | -0.102    | -0.259    | 0.164  | 0.264     | 0.17    | 0.074  |
| A015724_01 | 0.082     | -0.015 | 0.178     | 0.04      | -0.302 | -0.297    | -0.191  | -0.023 |
| A015725_01 | 0.035     | -0.072 | -0.005    | -0.047    | 0.357  | 0.427     | 0.058   | 0.034  |
| A015733_01 | 0.451     | 0.748  | 0.163     | -0.05     | 1.058  | 1.18      | 0.654   | 0.88   |
| A015739_01 | 0.025     | 0.192  | -0.216    | -0.147    | 0.101  | 0.209     | 0.104   | 0.075  |
| A015744_01 | -0.029 NA |        | -0.175    | -0.189 NA |        | 0.236     | 0.054   | -0.135 |
| A015747_01 | 0.25 NA   | NA     |           | -0.055    | 0.234  | 0.256 NA  |         | -0.049 |
| A015750_01 | NA        | NA     | -0.148    | -0.341    | -0.094 | -0.144    | 0.178   | 0.034  |
| A015753_01 | 0.196     | -0.062 | 0.04      | -0.063    | -0.116 | -0.386    | 0.23    | -0.378 |
| A015757_01 | -0.328    | -0.335 | 0.499     | 0.392     | 0.88   | 1.066     | 0.203   | 0.393  |
| A015762_01 | -0.327    | -0.279 | 0.159     | -0.168    | -0.169 | -0.189    | 0.147   | 0.184  |
| A015763_01 | 0.296 NA  |        | 0.219     | -0.038 NA | NA     | NA        |         | 0.121  |
| A015772_01 | -0.427 NA |        | 0.231     | 0.026 NA  |        | -0.55 NA  |         | -0.377 |
| A015776_01 | 0.452     | 0.358  | 0.002     | -0.124    | 0.268  | 0.185 NA  |         | 0.005  |
| A015777_01 | 0.116     | -0.066 | 0.202     | -0.093    | 0.009  | -0.053    | -0.042  | -0.242 |
| A015778_01 | 0.407     | 0.471  | 0.135     | 0.172     | 0.015  | -0.068 NA |         | -0.141 |
| A015779_01 | 0.049 NA  |        | 0.341     | 0.109 NA  |        | -0.054 NA |         | -0.052 |
| A015780_01 | 0.018     | 0.096  | -0.143    | -0.426    | -0.016 | -0.07 NA  |         | -0.062 |
| A015790_01 | 0.133     | 0.198  | 0.106     | -0.168    | 0.059  | -0.055    | -0.118  | -0.047 |
| A015793_01 | NA        | -0.315 | -1.392 NA | NA        |        | -0.971 NA | NA      |        |
| A015794_01 | 0.276     | 0.069  | -0.078    | -0.118    | 0.088  | -0.019    | 0.054   | -0.108 |
| A015797_01 | 0.21      | 0.003  | -0.441    | -0.545    | -0.821 | -1.264    | 0.486   | 0.232  |
| A015800_01 | -0.156    | -0.239 | -0.188 NA |           | -0.138 | -0.136 NA | NA      |        |
| A015805_01 | 0.299     | 0.205  | -0.324    | -0.315    | -0.28  | -0.302    | 0.148   | 0.082  |
| A015822_01 | 0.039     | 0.238  | -0.13     | 0.065     | -0.488 | -0.487    | -0.056  | 0.193  |
| A015825_01 | 0.21      | 0.129  | -0.152    | -0.198    | -0.239 | -0.419    | 0.007   | -0.078 |
| A015827_01 | -0.121    | -0.063 | 0.293     | -0.049    | -0.199 | -0.344 NA |         | -0.22  |
| A015833_01 | 0.325     | 0.265  | -0.288    | -0.207    | -0.037 | -0.246    | 0.375   | 0.324  |
| A015835_01 | NA        | NA     | 0.593     | 0.532 NA  |        | 0.338     | 0.163   | 0.027  |
| A015837_01 | -0.326 NA |        | 0.197 NA  |           | -0.513 | -0.649 NA | NA      |        |
| A015840_01 | -0.107    | -0.261 | 0.091     | -0.055    | -0.415 | -0.624    | -0.247  | -0.421 |
| A015841_01 | NA        | -0.024 | 0.034     | -0.2 NA   |        | -0.524 NA | NA      |        |
| A015843_01 | 0.222     | 0.285  | 0.279     | -0.011    | 0.029  | -0.136    | -0.011  | -0.017 |

|            |           |           |           |           |           |           |        |        |
|------------|-----------|-----------|-----------|-----------|-----------|-----------|--------|--------|
| A015844_01 | 0.293 NA  |           | -0.085    | -0.297 NA |           | -0.198    | 0.243  | -0.081 |
| A015850_01 | 0.071     | 0.165     | -0.293    | -0.347    | -0.349    | -0.342    | -0.349 | -0.272 |
| A015856_01 | 0.255 NA  |           | 0.131     | 0.107     | 0.524     | 0.627 NA  |        | -0.142 |
| A015860_01 | -2.577    | -2.573    | -1.866    | -1.941    | -3.518 NA | NA        |        | -2.334 |
| A015861_01 | -0.007 NA |           | 0.268     | 0.119 NA  |           | -1.463 NA |        | -0.294 |
| A015862_01 | 0.053 NA  |           | 0.063     | -0.036 NA | NA        |           | 0.009  | 0.001  |
| A015864_01 | -0.308 NA |           | -0.297 NA | NA        |           | -1.385 NA | NA     |        |
| A015866_01 | 0.827     | 0.664     | -0.298    | -0.179    | 0.288     | 0.35      | -0.479 | -0.407 |
| A015870_01 | 0.19      | 0.158     | -0.32     | -0.435    | 0.003     | 0.004     | 0.449  | 0.478  |
| A015874_01 | 0.569 NA  |           | 0.44      | 0.174     | 0.597     | 0.362     | 0.021  | -0.156 |
| A015876_01 | -0.103    | -0.036    | -0.131    | -0.076    | -0.101    | 0.016 NA  | NA     |        |
| A015877_01 | -0.757 NA |           | 0.526     | 0.538     | -1.05     | -1.442 NA |        | -0.723 |
| A015878_01 | -0.156    | -0.201    | -0.069    | 0.089     | 0.103     | 0.203     | 0.024  | -0.188 |
| A015879_01 | 0.424 NA  |           | 0.162     | -0.178    | 0.365     | 0.17      | 0.408  | 0.157  |
| A015881_01 | 0.06      | -0.216    | 0.109     | 0.073     | -0.186    | -0.277    | 0.08   | -0.112 |
| A015882_01 | -0.12     | -0.278    | 0.096     | -0.167    | -0.122    | -0.279 NA |        | -0.155 |
| A015883_01 | 0.068     | 0.009     | -0.022    | 0.146     | 0.51      | 0.749     | 0.095  | 0.044  |
| A015892_01 | 0.117     | 0.04      | 0.092     | 0.179     | 0.178     | 0.181     | 0.137  | -0.039 |
| A015893_01 | -0.336    | -0.154    | -0.194    | -0.05     | -0.087    | -0.111    | 0.04   | 0.196  |
| A015895_01 | -0.441    | -0.558    | 0.166     | -0.019    | -0.255    | -0.301    | -0.084 | -0.141 |
| A015896_01 | 0.157     | 0.057     | 0.173     | 0.175     | -0.182    | -0.269    | -0.352 | -0.322 |
| A015900_01 | 0.215     | 0.173     | 0.088     | 0.058     | 0.392     | 0.247     | 0.286  | 0.029  |
| A015904_01 | -0.087    | 0.06      | 0.271     | 0.271     | 0.305     | 0.351     | -0.082 | 0.167  |
| A015905_01 | -0.394 NA |           | 0.962     | 0.806     | 0.604     | 0.831     | -0.604 | -0.701 |
| A015906_01 | 0.275     | 0.038     | -0.101    | 0.052     | -0.018    | 0.049 NA  |        | -0.259 |
| A015910_01 | 0.129     | -0.093    | -0.148    | -0.04     | 0.07      | 0.032     | 0.193  | -0.071 |
| A015913_01 | 0.315     | 0.154     | 0.069     | -0.084    | 0.219     | 0.275     | -0.24  | -0.313 |
| A015916_01 | 0 NA      |           | 0.13      | -0.298    | 0.287     | -0.066 NA |        | -0.051 |
| A015922_01 | 0.187     | -0.177 NA | NA        | NA        |           | -1.425 NA | NA     |        |
| A015923_01 | 0.303     | 0.123     | 0.259     | 0.057     | 0.055     | -0.177    | -0.201 | -0.345 |
| A015929_01 | 0.049 NA  |           | 0.115     | 0.027 NA  |           | -0.911    | 0.013  | -0.042 |
| A015930_01 | 0.189 NA  |           | 0.17      | 0.094 NA  |           | -0.081 NA |        | -0.322 |
| A015936_01 | -0.13     | -0.339    | -1.831    | -1.653    | -0.848    | -0.704 NA | NA     |        |
| A015938_01 | 0.516     | 0.571     | -0.067    | -0.265    | -0.41     | -0.753 NA |        | -0.841 |
| A015940_01 | -0.156 NA |           | -0.202    | -0.398    | -0.443    | -0.743 NA |        | -0.602 |
| A015941_01 | -0.342    | -0.505    | -0.176    | -0.237    | -0.141    | -0.25 NA  | NA     |        |
| A015946_01 | -0.057    | -0.034    | -0.138    | -0.248    | -0.055    | -0.078 NA |        | -0.004 |
| A015948_01 | -2.111    | -1.75     | -1.191    | -1.181    | -2.65     | -3.136 NA | NA     |        |
| A015954_01 | -0.068    | -0.197    | -0.052 NA |           | 0.38      | 0.365 NA  | NA     |        |
| A015955_01 | 0.412     | 0.14      | 0.214     | 0.058     | 0.308     | 0.316     | -0.181 | -0.304 |
| A015956_01 | -0.054    | -0.099    | -0.039    | -0.112    | -0.076    | 0.111     | 0.06   | 0.075  |
| A015958_01 | 0.34      | 0.362     | 0.026     | 0.254     | 0.257     | 0.27      | -0.167 | -0.376 |
| A015959_01 | -0.011    | 0.131     | 0.172     | 0.05      | 0.323     | 0.364     | -0.131 | -0.124 |
| A015962_01 | 0.308     | 0.297     | 0.211     | 0.172     | 0.167     | 0.114     | 0.101  | 0.099  |
| A015963_01 | 0.429     | 0.103     | 0.087     | -0.203    | 0.444     | 0.487     | 0.134  | 0.095  |
| A015967_01 | -1.17     | -0.907    | 1.001     | 0.751     | 1.245     | 1.678     | 0.742  | 0.783  |
| A015968_01 | -0.065    | -0.021    | 0.021     | -0.122    | 0.047     | -0.079    | 0.098  | -0.061 |
| A015972_01 | 0.22 NA   |           | -0.015    | -0.078 NA | NA        |           | 0.028  | -0.175 |
| A015973_01 | 0.383     | 0.258     | 0.323     | 0.1       | 0.509     | 0.254     | 0.034  | -0.052 |
| A015977_01 | 0.36      | 0.432     | 0.374     | 0.212     | 0.472     | 0.338     | -0.152 | -0.195 |
| A015979_01 | 0.172     | 0.042     | -0.038    | -0.078    | 0.174     | 0.135     | -0.003 | -0.017 |
| A015980_01 | -0.203    | -0.086    | 1.013     | 0.792     | 0.38      | 0.224     | 0.009  | 0.027  |
| A015982_01 | -0.529    | -0.41     | -0.073    | -0.03     | -1.117    | -1.182    | -0.327 | -0.329 |
| A015984_01 | 0.303     | 0.225     | -0.442    | -0.561    | 0.486     | 0.662     | 0.194  | 0.266  |
| A015986_01 | 0.224 NA  | NA        |           | 0.204 NA  |           | -0.029 NA | NA     |        |
| A015987_01 | 0.049     | 0.176     | -0.057    | -0.12     | -0.324    | -0.364    | -0.037 | 0.061  |
| A015988_01 | -0.058    | -0.051    | -0.012    | -0.163    | -0.16     | -0.282 NA | NA     |        |
| A015990_01 | -0.019 NA |           | 0.04 NA   |           | 0.288     | 0.162 NA  |        | 0.021  |
| A015995_01 | 0.342     | 0.004     | 0.162     | -0.022    | -0.844    | -0.895    | -0.191 | -0.261 |
| A015996_01 | -0.012 NA |           | 0.258     | 0.185 NA  | NA        |           | 0.033  | 0.034  |
| A015997_01 | -0.421    | -0.39     | -0.246    | -0.187    | -0.393    | -0.363    | -0.338 | -0.333 |
| A015998_01 | 0.146     | -0.002    | 0.455     | 0.21      | -0.129    | -0.335 NA |        | -0.286 |
| A016000_01 | 0.265     | 0.194     | 0.116     | -0.048    | 0.158     | 0.022     | 0.013  | -0.082 |
| A016011_01 | 0.195     | 0.038     | -0.006    | -0.185    | 0.251     | 0.084     | 0.116  | -0.002 |
| A016012_01 | -0.161    | -0.267    | 0.198     | 0.252     | -0.446    | -0.592    | 0.093  | -0.215 |
| A016019_01 | -0.185    | -0.125    | 0.022     | 0.063     | -0.266    | -0.417    | 0.082  | 0.133  |
| A016020_01 | -0.075 NA |           | 0.065     | -0.147 NA | NA        |           | -0.042 | 0.007  |
| A016021_01 | 0.163     | 0.059     | -0.028    | 0.019     | 0.126     | -0.003    | 0.218  | 0.14   |

|            |           |        |           |           |        |           |          |        |
|------------|-----------|--------|-----------|-----------|--------|-----------|----------|--------|
| A016022_01 | -0.003    | -0.007 | -0.147    | -0.113    | 0.146  | 0.258     | -0.035   | 0.003  |
| A016023_01 | -0.12     | -0.108 | -0.032    | -0.126    | -0.05  | -0.265    | 0.043    | 0.159  |
| A016028_01 | 0.102     | -0.04  | -0.708 NA |           | 0.386  | 0.46 NA   |          | 0.239  |
| A016029_01 | -0.183    | -0.211 | -0.077    | -0.271    | 0.262  | 0.175     | 0.327    | 0.335  |
| A016033_01 | 0.233 NA  |        | -0.089    | 0.023 NA  | NA     |           | 0.215    | 0.248  |
| A016034_01 | 0.513     | 0.6    | -0.227    | -0.095    | -1.32  | -1.697    | -0.5     | -0.455 |
| A016035_01 | -0.224    | -0.251 | -0.025    | -0.129    | -0.121 | -0.244    | 0.046 NA |        |
| A016041_01 | 0.321     | 0.166  | 0.182     | -0.016    | 0.203  | 0.077 NA  | NA       |        |
| A016044_01 | -0.077 NA |        | -0.123    | -0.212 NA | NA     |           | -0.105   | 0.108  |
| A016046_01 | -0.164    | -0.165 | 0.211     | 0.029     | -0.392 | -0.579    | -0.001   | 0.144  |
| A016047_01 | -0.256    | -0.302 | -0.069    | -0.022    | -0.434 | -0.475    | 0.322    | 0.242  |
| A016048_01 | -0.091    | -0.088 | 0.164     | 0.112     | 0.408  | 0.536     | 0.188    | 0.1    |
| A016051_01 | 0.657     | 0.463  | 0.277     | 0.039     | 0.989  | 0.944 NA  |          | -0.09  |
| A016052_01 | 0.092     | -0.025 | 0.01      | 0.031     | -0.226 | -0.322    | 0.099    | -0.058 |
| A016055_01 | 0.246     | 0.15   | -0.163    | -0.322    | 0.149  | 0.326     | 0.053    | 0.21   |
| A016059_01 | 0.156     | 0.234  | 0.079     | 0.054     | 0.237  | 0.196     | 0.184    | 0.104  |
| A016062_01 | -0.253    | -0.537 | -0.125    | 0.084     | -0.481 | -0.418    | -0.151   | -0.251 |
| A016066_01 | -0.168    | -0.117 | -0.13     | -0.294    | -0.274 | -0.286    | 0.029    | 0.072  |
| A016068_01 | 0.402 NA  | NA     |           | -0.238 NA |        | -0.16 NA  |          | -0.18  |
| A016069_01 | -0.146    | -0.059 | -0.048    | 0.041     | -0.231 | -0.307    | 0.098    | 0.036  |
| A016070_01 | 0.065     | 0.053  | 0.192     | -0.067    | 0.2    | 0.002     | 0.125    | 0.023  |
| A016072_01 | 0.151     | 0.16   | -0.067    | -0.091 NA |        | -0.135    | 0.147    | 0.026  |
| A016073_01 | -0.071    | -0.127 | -0.333    | -0.305    | -0.298 | -0.525    | 0.105    | 0.166  |
| A016075_01 | 0.306     | 0.243  | 0.144     | -0.023    | -0.382 | -0.615    | 0.054    | 0.004  |
| A016083_01 | -1.177    | -0.974 | -0.938    | -1.279    | -1.517 | -1.783    | -1.152   | -1.058 |
| A016095_01 | 0.292     | 0.233  | 0.179     | 0.178     | -1.055 | -1.352    | -0.087   | -0.097 |
| A016099_01 | -0.069    | -0.21  | -0.029    | 0.111     | -0.153 | -0.264    | 0.315    | 0.035  |
| A016101_01 | 0.3       | 0.125  | 0.122     | 0.044     | 0.011  | 0.016     | 0.021    | 0.018  |
| A016103_01 | 0.182     | 0.258  | -0.084    | 0.056     | -0.372 | -0.424    | -0.101   | -0.085 |
| A016104_01 | -0.158    | -0.135 | -0.124    | -0.135    | -0.112 | -0.19     | 0.053    | 0.062  |
| A016105_01 | -0.155    | -0.045 | -0.025    | -0.212    | -0.045 | -0.143    | 0.085    | 0.069  |
| A016108_01 | -0.266    | -0.136 | 0.054     | -0.121    | -0.065 | -0.02     | -0.355   | -0.283 |
| A016113_01 | -0.085    | 0.128  | -0.126    | -0.131    | -0.435 | -0.213    | -0.091   | 0.234  |
| A016117_01 | 0.233     | 0.239  | 0.115     | 0.058     | -0.13  | -0.133    | -0.22    | -0.127 |
| A016119_01 | 0.252     | 0.006  | 0.355     | 0.288     | -0.906 | -1.306    | -0.051   | -0.269 |
| A016120_01 | 0.178     | -0.208 | -0.34     | -0.047    | -0.431 | -0.507 NA |          | -0.236 |
| A016123_01 | -0.127    | -0.17  | 0.337     | -0.308    | 0.24   | 0.062     | 0.044    | 0.198  |
| A016125_01 | -0.045    | -0.138 | 0.138     | 0.183     | 0.234  | 0.198     | -0.133   | -0.014 |
| A016126_01 | -0.047    | -0.085 | -0.374    | -0.141    | -0.296 | -0.162    | -0.031   | 0.238  |
| A016127_01 | 0.33 NA   | NA     |           | 0.139 NA  | NA     | NA        | NA       |        |
| A016130_01 | -0.053    | -0.268 | -0.086    | -0.31     | -0.139 | -0.538    | 0.213    | -0.145 |
| A016131_01 | 0.142     | -0.017 | -0.125    | -0.243    | -0.083 | 0.024     | -0.061   | 0      |
| A016134_01 | -0.132 NA |        | -0.243 NA |           | -0.344 | -0.163 NA | NA       |        |
| A016139_01 | 0.126 NA  |        | -0.012    | 0.028 NA  |        | -0.012    | -0.117   | -0.098 |
| A016141_01 | 0.591     | 0.444  | 0.33      | 0.208     | 0.277  | 0.085     | -0.076   | -0.311 |
| A016147_01 | 0.466     | 0.489  | 0.529     | 0.453     | -0.035 | -0.243    | -0.697   | -0.699 |
| A016148_01 | 0.114     | 0.656  | -0.469    | -0.26     | 0.19   | 0.359     | -0.308   | 0.072  |
| A016157_01 | 0.251     | 0.214  | -0.192    | -0.098    | -0.013 | -0.052    | 0.214    | 0.171  |
| A016163_01 | -0.017    | -0.045 | -0.085    | 0.015     | -0.347 | -0.261    | -0.182   | -0.114 |
| A016169_01 | 0.033 NA  |        | 0.174     | 0.091     | 0.253  | 0.494     | 0.101    | 0.099  |
| A016172_01 | 0.15      | 0.251  | 0.019     | -0.083    | 0.397  | 0.531     | 0.122    | 0.195  |
| A016173_01 | -0.174    | -0.362 | -0.479 NA |           | 0.029  | 0.234 NA  | NA       |        |
| A016174_01 | -0.151    | 0.037  | -0.25     | -0.08     | -0.085 | 0.126     | 0.197    | 0.138  |
| A016175_01 | -1.447    | -1.268 | -0.141    | -0.196    | -1.636 | -1.609    | -0.567   | -0.483 |
| A016177_01 | -0.787 NA |        | 0.101     | -0.008    | -0.131 | -0.281 NA | NA       |        |
| A016183_01 | -0.049    | -0.187 | -0.274    | -0.237    | -0.185 | 0.014     | 0.178    | 0.305  |
| A016186_01 | 0.161     | 0.07   | 0.091     | 0.044     | 0.628  | 0.701     | -0.1     | -0.187 |
| A016187_01 | -0.293    | -0.113 | -0.027    | 0.029     | -1.005 | -1.082    | -0.349   | -0.189 |
| A016191_01 | -0.202    | -0.102 | -0.234    | -0.319 NA |        | -0.214    | 0.159    | 0.179  |
| A016192_01 | 0.22 NA   |        | 0.07      | 0.117 NA  |        | 0.119     | 0.158    | -0.193 |
| A016193_01 | 0.293     | 0.57   | 0.133     | 0.162     | -0.932 | -0.983    | -0.231   | -0.071 |
| A016195_01 | 0.198     | -0.045 | -0.156    | -0.037    | 0.114  | 0.091 NA  |          | -0.19  |
| A016197_01 | -0.097    | -0.187 | -0.37     | -0.423    | -0.273 | -0.142    | 0.054 NA |        |
| A016198_01 | -0.282    | 0.01   | 0.122     | 0.313     | -0.971 | -0.994    | -0.185   | -0.31  |
| A016199_01 | 0.22      | 0.135  | 0.449     | 0.356     | 0.286  | 0.113     | -0.177   | -0.298 |
| A016201_01 | -0.4      | -0.348 | -0.045    | 0.152     | -0.272 | -0.159    | 0.002    | 0.203  |
| A016202_01 | -0.018    | 0.164  | -0.132    | -0.161    | -0.493 | -0.678    | 0.312    | 0.309  |
| A016207_01 | -0.018    | -0.027 | 0.175     | 0.253     | 0.075  | 0.139     | -0.141   | 0.003  |

|            |           |        |           |           |        |           |           |        |
|------------|-----------|--------|-----------|-----------|--------|-----------|-----------|--------|
| A016209_01 | 0.162     | 0.324  | 0.165     | 0.352     | -0.228 | -0.237    | -0.052    | -0.039 |
| A016210_01 | 0.228     | 0.035  | -0.482    | -0.419    | -0.442 | -0.619    | 0.202     | 0      |
| A016211_01 | -0.196    | -0.142 | -0.232    | -0.079    | 0.507  | 0.804     | 0.301     | 0.536  |
| A016215_01 | -0.323    | -0.429 | -0.179    | -0.321    | -0.148 | -0.201    | -0.225    | -0.04  |
| A016216_01 | -0.489 NA |        | 0.468     | 0.233     | 0.531  | 0.703     | -0.112    | -0.119 |
| A016221_01 | -0.04     | 0.355  | -0.143    | -0.215    | 0.235  | 0.446     | -0.034    | 0.381  |
| A016222_01 | 0.318     | 0.32   | 0.25      | 0.201     | 0.063  | 0.046     | -0.378    | -0.471 |
| A016226_01 | -0.006    | 0.125  | -0.811    | -0.444    | 0.182  | 0.389     | -0.468    | -0.661 |
| A016227_01 | -0.041    | -0.083 | 0.627     | 0.477     | 0.134  | 0.114     | -0.313    | -0.364 |
| A016229_01 | -0.049    | 0.26   | 0.079     | 0.222     | 0.488  | 0.831     | -0.089    | -0.041 |
| A016232_01 | 0.139 NA  |        | 0.07      | -0.024    | -0.105 | -0.131 NA | NA        |        |
| A016233_01 | -0.012    | 0.181  | 0.015     | -0.086    | -0.311 | -0.442    | -0.295    | -0.192 |
| A016234_01 | 0.174 NA  |        | 0.189     | 0.364     | 0.183  | 0.301 NA  | NA        |        |
| A016238_01 | -1.324    | -0.77  | 0.603     | 0.722     | 1.098  | 1.789     | 0.364     | 0.47   |
| A016240_01 | 0.19 NA   |        | 0.007 NA  |           | 0.259  | 0.212 NA  |           | 0.016  |
| A016244_01 | -0.026    | 0.121  | -0.445    | -0.219    | -0.09  | 0.134     | -0.015    | 0.075  |
| A016247_01 | 0.031     | -0.01  | 0.335     | 0.062     | 0.351  | 0.347     | -0.164    | -0.21  |
| A016250_01 | -0.25     | 0.019  | -0.002    | -0.206    | 0.086  | 0.366     | -0.053 NA |        |
| A016255_01 | 0.348     | 0.064  | -0.059    | -0.044    | 0.433  | 0.487     | -0.217    | -0.282 |
| A016260_01 | 0.071     | -0.043 | -0.083    | -0.235    | -0.04  | -0.168    | 0.103     | -0.086 |
| A016266_01 | 0.697     | 0.363  | -0.033    | 0.081     | 0.502  | 0.601     | 0.1       | -0.187 |
| A016267_01 | -0.013    | -0.04  | 0.199     | -0.022    | 0.091  | 0.227     | -0.099    | -0.041 |
| A016269_01 | 0.28      | 0.299  | 0.449 NA  |           | 0.165  | 0.218 NA  | NA        |        |
| A016271_01 | 0.107     | -0.024 | -0.146    | -0.216    | 0.077  | 0.059     | 0.096     | -0.145 |
| A016272_01 | 0.281     | 0.289  | -0.154    | -0.359    | 0.056  | 0.123 NA  |           | 0.035  |
| A016274_01 | 0.229 NA  |        | 0.071     | -0.051 NA |        | -0.209    | 0.199     | 0.258  |
| A016275_01 | 0.185     | 0.248  | -0.101    | -0.125    | 0.261  | 0.335     | 0.009     | 0.224  |
| A016278_01 | 0.062     | 0.192  | -0.803    | -0.53     | 0.374  | 0.606     | 0.401     | 0.589  |
| A016281_01 | 0.257     | 0.126  | 0.171     | 0.186     | 0.257  | 0.283     | 0.233     | 0.336  |
| A016282_01 | 0.052 NA  |        | 0.062 NA  |           | 0.455  | 0.668 NA  | NA        |        |
| A016283_01 | 0.324     | 0.197  | 0.326     | 0.187     | -0.449 | -0.585    | -0.061    | -0.108 |
| A016285_01 | -0.055    | -0.247 | -0.226    | -0.437    | -0.483 | -0.695    | 0.018     | -0.206 |
| A016286_01 | 0.339     | 0.319  | 0.304 NA  | NA        |        | 0.097 NA  | NA        |        |
| A016291_01 | 0.077     | 0.096  | 0.12      | 0.171     | 0.13   | 0.282     | 0.017     | -0.018 |
| A016297_01 | -0.281    | 0.133  | -0.5      | -0.519    | -0.085 | -0.007    | 0.079     | 0.333  |
| A016301_01 | 0.07 NA   |        | 0.314     | 0.292     | -0.479 | -0.625    | -0.222    | -0.186 |
| A016303_01 | -0.269    | -0.295 | 0.039     | 0.267     | -0.245 | -0.21     | 0.079     | -0.013 |
| A016306_01 | -0.526    | -0.372 | 0.031     | -0.013    | -0.019 | 0.062     | 0.166     | 0.077  |
| A016309_01 | -0.127    | -0.01  | 0.053     | 0.005     | -0.457 | -0.467    | -0.066    | -0.173 |
| A016312_01 | 0.267     | 0.003  | 0.056     | -0.08     | 0.171  | 0.085     | 0.069     | -0.06  |
| A016314_01 | -0.159    | -0.186 | 0.155     | 0.049     | 0.237  | 0.106     | 0.302     | 0.235  |
| A016316_01 | 0.039     | 0.018  | 0.085     | 0.113     | -0.575 | -0.611 NA | NA        |        |
| A016317_01 | -0.076    | -0.005 | -0.088    | -0.132    | -0.301 | -0.433    | 0.194     | 0.17   |
| A016319_01 | -0.285    | -0.214 | -0.622    | -0.502    | -0.971 | -1.244    | -0.315    | -0.487 |
| A016320_01 | -0.104    | -0.041 | -0.296    | -0.257    | -0.036 | 0.131     | 0.13      | 0.178  |
| A016321_01 | 0.164     | 0.079  | 0.373     | 0.168     | 0.8    | 0.68      | 0.476     | 0.253  |
| A016322_01 | -0.038    | -0.007 | -0.753    | -0.756    | -0.535 | -0.526    | 0.095     | 0.33   |
| A016323_01 | 0.132     | -0.004 | -0.005    | -0.095    | 0.467  | 0.593     | 0.059     | -0.18  |
| A016324_01 | -0.415    | -0.183 | -1.3      | -0.973    | -0.457 | -0.393    | -0.397    | -0.48  |
| A016325_01 | -0.005    | 0.026  | 0.018     | 0.088     | 0.013  | -0.092    | 0.153     | 0.129  |
| A016327_01 | 0.135     | 0.131  | 0.148     | 0.003     | 0.126  | -0.038    | 0.095     | -0.067 |
| A016330_01 | 0.207     | -0.009 | 0.161     | -0.218    | 0.136  | -0.062    | 0.12      | -0.174 |
| A016331_01 | -0.157    | -0.084 | -0.317    | -0.166    | -0.037 | 0.185     | -0.258    | -0.056 |
| A016332_01 | 0.119     | 0.438  | -0.904 NA |           | -0.275 | 0.023 NA  |           | 0.752  |
| A016333_01 | 0.193 NA  | NA     | NA        |           | 0.333  | 0.364 NA  | NA        |        |
| A016335_01 | -0.035    | -0.294 | -0.169    | 0.022     | -0.927 | -1.079    | -0.029    | -0.393 |
| A016337_01 | 0.286     | 0.399  | 0.356     | 0.233     | 0.455  | 0.335     | -0.498    | -0.216 |
| A016340_01 | -0.165    | -0.183 | -0.195 NA |           | 0.01   | 0.031 NA  | NA        |        |
| A016344_01 | -0.25     | -0.241 | -0.112    | -0.009    | -0.554 | -0.675    | -0.085    | -0.264 |
| A016347_01 | 0.075 NA  |        | -0.205    | -0.213 NA | NA     |           | 0.433     | 0.267  |
| A016351_01 | 0.17      | 0.064  | -0.181    | -0.224    | 0.254  | 0.147     | 0.136 NA  |        |
| A016354_01 | 0.205 NA  |        | 0.275     | -0.063    | 0.322  | 0.2 NA    |           | 0      |
| A016359_01 | 0.508     | 0.252  | -0.135    | 0.048     | -0.206 | -0.282    | 0.032     | -0.172 |
| A016360_01 | -0.128    | 0.097  | 0.057     | -0.11     | -0.094 | -0.121    | 0.035     | 0.153  |
| A016362_01 | 0.09      | -0.238 | 0.077     | 0.008     | -0.562 | -0.708    | -0.098 NA |        |
| A016363_01 | 0.295     | 0.135  | 0.258     | 0.177     | -0.094 | -0.222    | 0.025     | -0.277 |
| A016364_01 | -0.249    | -0.192 | -0.678    | -0.754    | -0.369 | -0.321    | -0.417    | -0.464 |
| A016367_01 | 0.184     | 0.257  | -0.082    | -0.011    | -0.014 | -0.032    | 0.163     | 0.132  |

|            |           |           |           |           |        |           |           |        |
|------------|-----------|-----------|-----------|-----------|--------|-----------|-----------|--------|
| A016368_01 | 0.865     | 0.842     | -0.65     | -0.655    | -0.559 | -0.789    | 0.509     | 0.531  |
| A016369_01 | 0.218     | 0.265     | -0.109 NA |           | 0.021  | 0.034     | 0.028 NA  |        |
| A016370_01 | 0.098     | 0.119     | 0.146     | 0.06      | 0.32   | 0.338     | 0.257     | 0.312  |
| A016372_01 | -0.059    | 0.178     | -0.197    | -0.534    | -1.174 | -1.304 NA |           | 0.011  |
| A016373_01 | 0.347 NA  |           | -0.311    | -0.183    | -0.378 | -0.624    | 0.386     | 0.146  |
| A016374_01 | -0.137 NA |           | 0.067     | -0.009    | 0.015  | 0.259     | -0.202    | -0.036 |
| A016376_01 | -0.288    | -0.278    | 0.05      | -0.127    | -0.313 | -0.397    | 0.02      | 0.068  |
| A016378_01 | 0.35      | 0.035     | -0.024    | -0.194    | 0.169  | 0.298 NA  |           | -0.04  |
| A016380_01 | 0.016 NA  |           | -0.369    | -0.459    | 0.221  | 0.289     | 0.524     | 0.398  |
| A016382_01 | 0.176 NA  |           | 0.264     | 0.156 NA  |        | -0.139    | 0.108     | 0.029  |
| A016383_01 | 0.026     | 0.176     | -0.064    | -0.197    | 0.034  | 0.038     | 0.087     | 0.136  |
| A016384_01 | -0.019    | -0.176    | -0.054    | -0.122    | -0.379 | -0.477    | 0.016     | -0.042 |
| A016385_01 | 0.229 NA  |           | -0.408    | -0.511    | 0.158  | 0.111     | 0.398     | 0.095  |
| A016390_01 | -0.055    | -0.164    | -0.015    | 0.037     | -0.205 | -0.032    | 0.158     | 0.136  |
| A016393_01 | 0.607     | 0.47      | 0.704     | 0.523     | 0.868  | 0.609     | 0.163     | 0.252  |
| A016394_01 | 0.38      | 0.179     | 0.181     | -0.032    | -0.001 | -0.105    | -0.096    | 0.029  |
| A016399_01 | -0.212    | -0.381    | -0.217    | -0.172    | 0.183  | 0.293     | 0.048     | -0.133 |
| A016402_01 | -3.033    | -2.37     | -1.094    | -1.355    | 0.708  | 1.493     | -0.334    | 0.473  |
| A016407_01 | 0.306 NA  |           | 0.208     | 0.144     | 0.26   | 0.163     | 0.035     | -0.024 |
| A016408_01 | NA        | NA        | 0.204     | -0.191    | -0.205 | -0.275    | 0.292     | 0.106  |
| A016411_01 | -0.011    | 0.226     | -0.303    | -0.209    | 0.448  | 0.649     | 0.031     | 0.233  |
| A016412_01 | 0.173     | 0.041     | 0.183     | 0.071     | -0.259 | -0.46     | 0.223     | 0.02   |
| A016416_01 | 0.797     | 0.682     | -0.456    | -0.666 NA |        | -0.12     | 0.542     | 0.346  |
| A016417_01 | -0.039    | 0.043     | -0.042    | -0.177    | 0.11   | -0.1      | -0.086    | -0.204 |
| A016419_01 | -0.074 NA |           | 0.176     | 0.095 NA  | NA     |           | -0.211    | 0.096  |
| A016420_01 | -0.149    | -0.123    | -0.391    | -0.03     | -0.603 | -0.576    | 0.355     | 0.427  |
| A016421_01 | 0.023 NA  |           | 0.162     | 0.327 NA  |        | -0.485    | -0.033    | -0.166 |
| A016422_01 | -0.004 NA |           | -0.034    | -0.116 NA |        | -0.253    | -0.086    | -0.088 |
| A016423_01 | 0.056     | 0.164     | -0.023    | -0.064    | 0.258  | 0.432     | 0.119     | 0.168  |
| A016425_01 | 0.282     | 0.36      | -0.041    | -0.18     | 0.316  | 0.334     | 0.427     | 0.413  |
| A016426_01 | 0.113     | 0.214     | -0.103    | -0.099    | 0.032  | 0.298     | -0.098    | 0.2    |
| A016431_01 | 0.126     | -0.317    | 0.137     | 0.298     | 0.566  | 0.753     | 0.343     | 0.075  |
| A016432_01 | 0.272     | -0.036    | 0.04      | -0.173    | -0.014 | -0.121    | 0.169     | -0.001 |
| A016442_01 | 0.412     | 0.01 NA   | NA        |           | 0.839  | 0.554 NA  |           | -0.052 |
| A016443_01 | -0.095    | -0.108    | -0.032    | -0.075    | 0.045  | 0.134     | -0.075    | -0.219 |
| A016444_01 | 0.179 NA  |           | -0.142    | -0.19 NA  |        | -0.412    | 0.271     | 0.001  |
| A016446_01 | -3.439    | -2.282 NA |           | -4.309    | -1.79  | -1.286    | -2.756 NA |        |
| A016447_01 | -0.166 NA |           | 0.294     | 0.143 NA  | NA     |           | -0.099    | -0.331 |
| A016449_01 | 0.393 NA  |           | 0.28      | -0.016 NA |        | 0.159 NA  |           | -0.118 |
| A016453_01 | -0.111    | -0.082    | 0.224     | 0.255     | -0.726 | -1.147    | -0.205    | -0.277 |
| A016456_01 | 0.175 NA  |           | 0.396     | 0.145 NA  | NA     | NA        |           | 0.131  |
| A016458_01 | 0.097     | 0.045     | -0.295    | -0.108    | -0.018 | 0.049     | 0.202     | 0.13   |
| A016459_01 | -0.017 NA |           | 0.303     | 0.174     | -0.225 | -0.588 NA |           | -0.296 |
| A016460_01 | 0.042     | -0.032    | 0.235 NA  |           | 0.142  | 0.008 NA  | NA        |        |
| A016462_01 | -0.646    | -0.693    | 0.888     | 0.893     | 1.377  | 1.923     | 0.577     | 0.38   |
| A016463_01 | 0.163     | 0.122     | -0.054    | -0.053    | 0.26   | 0.333     | -0.506    | -0.682 |
| A016465_01 | 0.238     | 0.238     | 0.248     | 0.029     | 0.336  | 0.338     | -0.14     | -0.078 |
| A016466_01 | -0.377 NA |           | -0.332    | -0.353    | -0.197 | -0.42 NA  | NA        |        |
| A016472_01 | 0.262     | 0.33      | 0.352 NA  |           | 0.441  | 0.6 NA    | NA        |        |
| A016473_01 | 0.222     | 0.281     | -0.101    | -0.329    | 0.633  | 0.793     | 0.503     | 0.618  |
| A016476_01 | -0.788    | -0.809    | 1.248     | 1.107     | 1.031  | 1.351     | 0.463     | 0.172  |
| A016478_01 | 0.122     | 0.052     | -0.062    | -0.097    | -0.057 | -0.445    | 0.23      | 0.113  |
| A016483_01 | 0.189 NA  |           | -0.095    | -0.015    | -0.186 | -0.216    | 0.235     | 0.086  |
| A016484_01 | -0.3      | -0.47     | -0.001    | -0.083    | -0.979 | -0.893    | -0.302    | -0.545 |
| A016494_01 | 0.043     | -0.257    | 0.067     | 0.052     | 0.257  | 0.233 NA  | NA        |        |
| A016502_01 | -0.121    | -0.083    | -0.239    | -0.182    | -0.03  | 0.016     | 0.054     | 0.079  |
| A016509_01 | -0.342 NA |           | -0.362    | -0.491    | 0.409  | 0.603 NA  | NA        |        |
| A016510_01 | -0.435    | -0.502    | 0.092     | -0.14     | 0.133  | 0.341     | -0.336    | -0.248 |
| A016511_01 | -0.109    | 0.073     | 0.183     | -0.028    | 0.114  | 0.135     | 0.098     | 0.013  |
| A016514_01 | -0.122 NA |           | -0.046    | -0.184 NA |        | 0.068 NA  |           | -0.133 |
| A016516_01 | 0.243     | 0.288     | 0.082     | -0.06     | 0.096  | -0.022    | -0.153 NA |        |
| A016520_01 | 0.351 NA  |           | 0.18 NA   | NA        | NA     | NA        |           | 0.513  |
| A016536_01 | -0.079 NA |           | -0.229    | -0.263    | 0.372  | 0.707     | -0.271    | -0.046 |
| A016553_01 | 0.053     | 0.105     | 0.064     | -0.074    | 0.259  | 0.387     | -0.058    | 0.057  |
| A016565_01 | -0.283    | -0.272    | -0.1      | 0.026     | -0.237 | 0         | 0.046     | -0.13  |
| A016567_01 | -0.315 NA |           | 0.229     | -0.174 NA | NA     |           | 0.273     | 0.235  |
| A016575_01 | 0.283     | 0.298     | 0.105     | -0.163    | 0.894  | 1.305     | -0.352    | -0.239 |
| A016578_01 | -1.096    | -1.047    | 1.067     | 1.083     | 1.215  | 1.594 NA  |           | 0.172  |

|            |    |           |           |           |           |        |           |           |        |
|------------|----|-----------|-----------|-----------|-----------|--------|-----------|-----------|--------|
| A016580_01 |    | -0.101    | -0.055    | -0.141    | -0.103    | 0.123  | 0.372     | 0.05      | 0.004  |
| A016585_01 |    | -0.289    | -0.133    | 0.095     | -0.005    | -0.467 | -0.697    | 0.192     | 0.106  |
| A016586_01 |    | -0.144 NA |           | -0.425    | -0.287    | 0.405  | 0.631     | 0.332     | 0.217  |
| A016588_01 |    | -0.514    | -0.538    | 1.247     | 0.928     | 1.666  | 2.144     | 0.615     | 0.769  |
| A016591_01 |    | -0.215 NA |           | -0.279 NA |           | 0.033  | 0.139 NA  |           | -0.036 |
| A016592_01 |    | 0.022 NA  |           | 0.154 NA  |           | 0.136  | 0.107 NA  | NA        |        |
| A016597_01 |    | 0.083     | -0.123    | -0.514    | -0.32     | -0.086 | 0.025     | 0.029     | -0.092 |
| A016605_01 |    | 0.065     | 0.121     | 0.092     | -0.118    | 0.245  | 0.168     | -0.048    | -0.157 |
| A016612_01 |    | 0.31      | 0.072     | -0.326    | -0.37     | 0.124  | -0.036    | 0.276     | 0.238  |
| A016615_01 |    | -0.43     | -0.232    | -0.154    | -0.044    | 1.257  | 1.623     | 0.746     | 1.07   |
| A016618_01 |    | 0.005     | -0.129    | -0.151    | -0.24     | 0.764  | 0.75      | 0.401     | 0.433  |
| A016623_01 |    | -0.173    | -0.01     | -0.01     | -0.004    | -0.068 | 0.091     | -0.086    | 0.175  |
| A016625_01 |    | -0.195    | -0.271    | -0.26     | -0.288    | -0.538 | -0.581    | -0.019    | -0.145 |
| A016628_01 |    | 0.041     | -0.032    | -0.122    | -0.405    | 0.297  | 0.665 NA  |           | -0.207 |
| A016631_01 |    | -0.151    | -0.122    | -0.013    | 0.069     | -0.025 | 0.035     | 0.07      | 0.061  |
| A016633_01 |    | 0.031 NA  |           | -0.054    | -0.433 NA |        | -0.004    | 0.072     | -0.026 |
| A016638_01 |    | 0.097     | 0.052     | 0.047     | 0.045     | 0.311  | 0.399     | 0.173     | 0.102  |
| A016644_01 |    | 0.687     | 0.278     | 0.575     | 0.194     | 0.655  | 0.527 NA  |           | -0.17  |
| A016645_01 |    | 0.481 NA  |           | 0.179     | -0.228    | 0.468  | 0.298 NA  |           | 0.03   |
| A016649_01 |    | 0.315     | 0.143     | -0.018    | -0.104    | 0.072  | 0.002     | 0.006     | -0.154 |
| A016650_01 |    | -0.203 NA |           | -0.195    | -0.275    | 0.125  | 0.247     | 0.031     | -0.145 |
| A016651_01 |    | 0.364     | 0.113     | -0.045    | -0.23     | 0.184  | 0.127     | 0.053     | -0.101 |
| A016652_01 |    | -0.138    | -0.154    | -0.436    | -0.591    | 0.297  | 0.476     | 0.072     | 0.002  |
| A016656_01 |    | 0.239     | 0.12      | -0.244    | -0.19     | 0.227  | 0.338     | 0.217     | 0.095  |
| A016658_01 |    | 0.192 NA  |           | 0.148     | 0.162 NA  |        | 0.12      | 0.308     | -0.001 |
| A016661_01 |    | 0.462 NA  |           | 0.318     | 0.297 NA  |        | -0.467    | 0.014     | -0.109 |
| A016662_01 |    | 0.032 NA  |           | -0.12     | -0.357    | -0.058 | -0.19     | -0.03     | -0.023 |
| A016664_01 |    | -0.055    | -0.012    | -0.081 NA |           | 0.024  | -0.016 NA |           | 0.12   |
| A016665_01 | NA | NA        |           | -0.202    | -0.075 NA |        | -0.59     | -0.077    | -0.224 |
| A016673_01 |    | 0.244     | 0.03      | -0.134    | -0.078    | 0.053  | -0.278    | -0.011    | -0.373 |
| A016676_01 |    | -1.029 NA |           | -0.214    | -0.212    | -0.95  | -1.072    | -0.731    | -0.86  |
| A016682_01 |    | 0.215     | 0.165     | -0.061    | -0.016    | 0.439  | 0.544     | 0.014     | -0.04  |
| A016696_01 |    | 0.329     | 0.071     | -0.187    | -0.231 NA |        | 0.182     | 0.253     | -0.071 |
| A016697_01 |    | 0.212     | 0.217     | 0.183     | 0.115     | -0.148 | -0.084 NA |           | -0.198 |
| A016703_01 |    | -0.029    | 0.038     | -0.062    | -0.026    | 0.165  | 0.288     | 0.119     | 0.119  |
| A016705_01 |    | -0.504 NA | NA        |           | -0.182    | 0.158  | 0.4 NA    |           | 0.317  |
| A016715_01 |    | -0.083    | 0.119     | -0.166    | -0.282    | 0.219  | 0.331     | 0.067     | 0.3    |
| A016721_01 |    | -0.027    | 0.162 NA  | NA        |           | 0.057  | 0.008 NA  | NA        |        |
| A016723_01 |    | -0.031 NA |           | 0.48      | 0.379 NA  |        | -0.906    | -0.089 NA |        |
| A016728_01 |    | -0.015    | -0.165    | -0.261    | -0.273    | -0.296 | -0.387    | -0.228    | -0.544 |
| A016731_01 |    | -0.094    | 0.115     | -0.076    | -0.157    | 0.392  | 0.554     | 0.224     | 0.283  |
| A016735_01 |    | 0.092     | 0.005     | 0.246     | 0.105     | 0.282  | 0.282     | -0.1      | -0.215 |
| A016736_01 |    | -0.372    | -0.578 NA | NA        |           | -0.602 | -0.608 NA | NA        |        |
| A016738_01 |    | 0.057 NA  |           | 0.201     | 0.258     | 0.181  | 0.341 NA  |           | -0.348 |
| A016740_01 |    | 0.328     | 0.106     | 0.198     | 0.049     | 0.227  | -0.065    | 0.194     | -0.073 |
| A016742_01 |    | -0.138    | -0.048    | 0.221     | 0.123     | -0.06  | 0.094     | -0.12     | -0.141 |
| A016750_01 |    | -0.161 NA |           | 0.012     | -0.109    | -0.282 | -0.394    | 0.219     | 0.195  |
| A016751_01 |    | -0.252    | -0.214    | 0.098 NA  |           | -0.096 | 0.042     | 0.152     | 0.306  |
| A016752_01 |    | 0.245     | 0.037     | 0.172     | 0.045     | 0.255  | 0.096     | 0.145     | -0.048 |
| A016754_01 |    | -0.789    | -1.128 NA |           | -1.196    | -1.452 | -1.48 NA  | NA        |        |
| A016756_01 |    | 0.056     | -0.062    | 0.024     | -0.124    | -0.001 | -0.197    | 0.142     | 0.119  |
| A016761_01 |    | 0.142     | 0.371     | -0.165    | -0.13     | 0.374  | 0.491     | 0.115     | 0.215  |
| A016762_01 |    | -0.034    | -0.137    | 0.519     | 0.404     | 1.333  | 1.625     | 0.447     | 0.316  |
| A016767_01 |    | -0.062    | -0.156    | -0.241    | -0.22     | -0.248 | -0.06     | 0.024     | 0.045  |
| A016786_01 |    | 0.237 NA  |           | 0.344     | -0.001 NA |        | -0.063 NA |           | -0.324 |
| A016794_01 |    | 0.269 NA  |           | -0.211    | -0.103    | 0.302  | 0.087     | 0.311     | 0.22   |
| A016797_01 |    | -0.009    | -0.01     | -0.083    | 0.019     | 0.194  | 0.265     | 0.113     | 0.005  |
| A016803_01 |    | -0.036    | 0.034     | 0.253     | 0.406     | 0.056  | 0.154 NA  | NA        |        |
| A016804_01 |    | 0.125     | 0.089     | -0.085    | -0.317    | 0.28   | 0.043     | 0.431     | 0.268  |
| A016809_01 |    | 0.155     | 0.012     | 0.084     | 0.037     | -0.123 | -0.234 NA | NA        |        |
| A016812_01 |    | -0.066    | -0.16     | -0.02     | -0.017    | 0.071  | 0.013     | -0.184    | -0.213 |
| A016813_01 |    | 0.238 NA  |           | -0.023    | -0.269 NA |        | -0.44     | -0.112    | -0.051 |
| A016817_01 |    | 0.104     | 0.053     | -0.451    | -0.251    | 0.157  | 0.121     | 0.267     | 0.094  |
| A016820_01 |    | 0.4       | 0.18      | 0.301     | 0.24      | 0.519  | 0.488     | 0.218     | -0.01  |
| A016827_01 |    | -0.083 NA |           | -0.39     | -0.6      | 0.1    | 0.024     | -0.196    | -0.117 |
| A016830_01 |    | 0.222     | 0.256     | 0.145     | 0.083     | 0.301  | 0.343     | -0.048    | -0.109 |
| A016832_01 | NA |           | -0.399    | -0.337    | -0.166    | -0.03  | 0.139     | 0.287     | 0.441  |
| A016836_01 |    | -0.138    | -0.123    | -0.138    | -0.184    | 0.758  | 1.004     | 0.388     | 0.19   |

|            |           |           |           |           |        |           |           |        |
|------------|-----------|-----------|-----------|-----------|--------|-----------|-----------|--------|
| A016838_01 | 0.221     | -0.037    | -0.48     | -0.65     | -0.015 | 0.057     | 0.171     | 0.234  |
| A016839_01 | 0.222     | 0.095     | -0.08     | -0.208    | 0.831  | 0.843     | 0.46      | 0.279  |
| A016845_01 | -0.161 NA |           | 0.437     | 0.392 NA  | NA     |           | -0.101    | -0.087 |
| A016847_01 | -0.625    | -0.82     | 0.217     | 0.269     | 0.32   | 0.546 NA  | NA        |        |
| A016851_01 | 0.195 NA  |           | -0.128    | 0.042 NA  |        | -0.416 NA |           | 0.053  |
| A016853_01 | -0.579    | -0.162    | 0.104     | 0.21      | 0.186  | 0.413     | -0.139    | -0.085 |
| A016860_01 | -0.676 NA |           | 0.046 NA  |           | -0.233 | -0.274 NA | NA        |        |
| A016868_01 | 0.313     | 0.105     | 0.245     | 0.014 NA  |        | -0.032    | -0.055 NA |        |
| A016869_01 | -0.329    | -0.274    | -0.195    | -0.218    | -0.516 | -0.598    | -0.004    | -0.012 |
| A016873_01 | -0.075    | -0.189    | -0.035    | -0.015    | -0.201 | -0.262    | 0.174     | -0.228 |
| A016875_01 | 0.121     | -0.03     | -0.048    | -0.11     | 0.063  | 0.008     | 0.161     | 0.125  |
| A016880_01 | 0.316     | 0.336     | 0.108     | 0.097     | -0.025 | -0.338    | 0.029 NA  |        |
| A016883_01 | 0.005 NA  |           | -0.188    | -0.149    | -0.301 | -0.187    | 0.173     | 0.075  |
| A016884_01 | -0.073    | -0.208    | -0.175    | -0.274    | -0.298 | -0.527    | -0.035    | -0.065 |
| A016886_01 | -0.541    | -0.421 NA |           | -0.608    | -0.182 | -0.379 NA |           | 0.468  |
| A016888_01 | -0.265 NA |           | 0.091     | -0.175 NA |        | 0.465     | 0.23      | 0.188  |
| A016894_01 | 0.26 NA   |           | 0.153     | -0.015    | -0.104 | -0.349 NA |           | -0.187 |
| A016897_01 | -0.009    | -0.024    | -0.331    | -0.293    | 0.244  | 0.359     | 0.145     | 0.04   |
| A016898_01 | -0.076    | 0.04      | -0.717    | -0.504    | 0.249  | 0.55      | 0.291     | 0.377  |
| A016900_01 | -0.231    | -0.044    | 0.127     | 0.08      | -0.016 | -0.013    | -0.245    | -0.136 |
| A016901_01 | 0.135     | -0.1      | 0.139     | 0.002     | -0.016 | -0.203 NA |           | -0.277 |
| A016902_01 | 0.028     | -0.272 NA |           | -0.15     | 0.266  | 0.147     | 0.06      | -0.045 |
| A016904_01 | -0.113    | -0.121    | -0.049    | -0.097    | 0.345  | 0.547     | 0.138     | 0.072  |
| A016905_01 | -0.063 NA |           | 0.29      | 0.135 NA  |        | -0.811 NA |           | 0.029  |
| A016907_01 | -0.652    | -0.77     | 0.238     | 0.264     | -0.234 | -0.153    | -0.586    | -0.299 |
| A016909_01 | 0.036     | -0.1      | -0.229    | -0.076    | -0.003 | 0.107     | -0.15     | -0.206 |
| A016913_01 | 0.035     | -0.09     | 0.519     | 0.385     | 0.695  | 0.9       | 0.235     | 0.103  |
| A016914_01 | -0.281    | -0.381    | -0.34     | -0.427    | -0.441 | -0.663    | -0.089    | -0.095 |
| A016915_01 | -0.135    | 0.015     | -0.23     | -0.167    | 0.175  | 0.254     | 0.087     | 0.096  |
| A016922_01 | -0.351    | -0.264    | -0.064    | -0.112    | -0.987 | -0.924    | -0.686    | -0.524 |
| A016923_01 | -0.052    | -0.13     | 0.255     | 0.189     | -0.128 | -0.18     | -0.188    | -0.159 |
| A016924_01 | 0.788     | 0.854     | -0.132    | -0.221    | -0.547 | -1.059    | 0.092     | 0.106  |
| A016925_01 | -0.023    | -0.068    | 0.178     | 0.29      | 0.771  | 0.91      | 0.09      | 0.064  |
| A016926_01 | -0.277    | -0.098    | -0.038    | 0.292     | -0.259 | 0.011     | 0.025     | 0.07   |
| A016929_01 | -0.083    | -0.221    | -0.079    | -0.079    | -0.578 | -0.607    | 0.108     | -0.038 |
| A016930_01 | -0.083    | -0.049    | -0.094    | -0.05     | 0.341  | 0.582     | 0.052     | 0.077  |
| A016931_01 | -0.019    | 0.387     | 0.056     | -0.091    | 0.347  | 0.39 NA   |           | 0.117  |
| A016933_01 | -0.188    | -0.008    | 0.012     | 0.132     | 0.079  | 0.235     | 0.03      | 0.084  |
| A016936_01 | -0.084    | 0.186     | 0.101     | 0.185     | 0.275  | 0.467     | -0.084    | 0.359  |
| A016937_01 | 0.151     | 0.274     | 0.559     | 0.575     | -0.773 | -1.015    | -0.128    | -0.253 |
| A016941_01 | -0.198    | -0.064    | -0.067    | -0.211    | -0.218 | -0.197    | -0.191    | -0.079 |
| A016943_01 | 0.088     | -0.028    | 0.038     | 0.089     | 0.331  | 0.465     | 0.145     | 0.036  |
| A016946_01 | -0.129    | -0.056    | -0.231    | -0.004    | -0.705 | -0.552    | -0.164    | -0.15  |
| A016947_01 | 0.237     | 0.051     | 0.018     | 0.13      | -0.219 | -0.278    | 0.148     | 0.09   |
| A016949_01 | -0.403    | -0.347    | -0.099    | -0.057    | 0.316  | 0.397     | -0.569    | -0.733 |
| A016950_01 | -0.019    | -0.347    | 0.354     | 0.012     | -0.225 | -0.472    | -0.384    | -0.617 |
| A016951_01 | -0.208    | -0.137    | -0.185    | -0.012    | 0.566  | 0.935     | 0.049     | 0.083  |
| A016952_01 | 0.206     | 0.199     | 0.356     | 0.202     | 0.076  | -0.112    | 0.028     | -0.115 |
| A016954_01 | 0.103 NA  |           | 0.054 NA  | NA        | NA     | NA        | NA        |        |
| A016955_01 | 0.127     | 0.15      | -0.387    | -0.28     | 0.521  | 0.667     | 0.298     | 0.095  |
| A016956_01 | 0.318     | 0.457     | -0.214    | -0.001 NA |        | 0.056     | 0.039     | 0.07   |
| A016959_01 | 0.529     | 0.458     | 0.207     | 0.311 NA  |        | 0.067     | 0.241     | 0.072  |
| A016960_01 | 0.422 NA  |           | -0.016    | -0.264 NA | NA     |           | 0.063     | 0.047  |
| A016966_01 | -0.379    | -0.384    | -0.382    | -0.121    | -0.295 | -0.229    | -0.03     | -0.117 |
| A016967_01 | NA        | NA        | 0.298     | 0.079     | 0.143  | 0.221     | -0.796    | -0.574 |
| A016969_01 | 0.016     | -0.055    | 0.032     | 0.053     | 0.351  | 0.522     | -0.137    | -0.266 |
| A016971_01 | -0.267 NA |           | -1.495 NA |           | -0.911 | -0.731    | -0.184    | -0.107 |
| A016976_01 | 0.191 NA  |           | 0.596     | 0.591     | -0.075 | -0.24     | -0.229    | -0.688 |
| A016977_01 | -0.49 NA  |           | -0.746    | -0.849    | -0.903 | -1.103    | -0.148    | -0.345 |
| A016978_01 | 0.108     | 0.137     | -0.026    | 0.124     | -0.04  | -0.06     | 0.118     | -0.088 |
| A016979_01 | -0.184    | -0.308    | 0.172     | 0.022     | -0.564 | -0.575    | -0.04     | -0.042 |
| A016980_01 | -0.202 NA |           | -0.474    | -0.331 NA |        | -0.403    | 0.17      | 0.069  |
| A016984_01 | 0.312     | 0.097     | 0.351     | 0.293     | -0.175 | -0.362    | -0.125    | -0.28  |
| A016987_01 | -0.173    | -0.063    | 0.156     | 0.205     | 0.068  | 0.167     | 0.059     | 0.076  |
| A016991_01 | -0.359    | -0.369    | 0.149     | 0.031     | 0.147  | 0.342     | -0.077    | 0.012  |
| A016997_01 | 0.02      | 0.02      | -0.241 NA |           | -0.136 | -0.099 NA | NA        |        |
| A017000_01 | 0.182     | -0.032    | -0.097    | -0.123    | 0.057  | 0.046     | 0.038     | -0.027 |
| A017002_01 | 0.373     | 0.136     | 0.239     | 0.217     | 0.184  | 0.065     | 0.04      | -0.208 |



|            |        |        |        |        |        |        |        |        |
|------------|--------|--------|--------|--------|--------|--------|--------|--------|
| A017003_01 | -0.26  | -0.128 | -0.173 | -0.162 | 0.198  | 0.472  | 0.128  | 0.38   |
| A017004_01 | 0.039  | 0.281  | 0.101  | -0.072 | NA     | 0.114  | 0.038  | 0.082  |
| A017008_01 | -0.041 | NA     | 0.192  | 0.073  | 0.006  | 0.096  | 0.058  | 0.011  |
| A017010_01 | -0.213 | -0.06  | -0.057 | -0.123 | -0.811 | -0.958 | -0.373 | -0.43  |
| A017012_01 | 0.3    | -0.042 | -0.098 | 0.037  | 0.02   | 0.071  | 0.134  | -0.089 |
| A017013_01 | 0.171  | 0.356  | 0.21   | 0.332  | 0.129  | 0.188  | 0.111  | 0.117  |
| A017015_01 | -0.344 | -0.374 | -0.111 | -0.082 | -0.688 | -0.845 | 0.209  | 0.034  |
| A017016_01 | -0.661 | -0.678 | -0.274 | -0.468 | -1.448 | -1.445 | -0.563 | -0.453 |
| A017020_01 | 0.414  | NA     | 0.14   | 0.326  | NA     | 0.021  | NA     | -0.162 |
| A017021_01 | 0.042  | -0.259 | 0.048  | 0.014  | -0.246 | -0.333 | NA     | -0.161 |
| A017022_01 | -0.028 | 0.009  | -0.064 | 0.02   | NA     | -0.159 | -0.128 | -0.432 |
| A017024_01 | 0.063  | -0.03  | 0.074  | 0      | -0.093 | -0.034 | 0.151  | 0.024  |
| A017025_01 | -0.101 | NA     | NA     | NA     | NA     | 0.089  | NA     | NA     |
| A017026_01 | -0.395 | -0.057 | 0.363  | 0.46   | 0.112  | 0.192  | 0.027  | 0.095  |
| A017028_01 | -0.27  | -0.582 | -0.322 | -0.18  | -0.469 | -0.506 | 0.078  | -0.1   |
| A017031_01 | -0.054 | -0.008 | 0.13   | 0.043  | -0.092 | -0.359 | 0.079  | -0.211 |
| A017032_01 | -0.155 | 0.061  | -0.025 | 0.056  | -0.117 | 0.023  | 0.3    | 0.438  |
| A017034_01 | -0.276 | 0.004  | 0.003  | 0.194  | 0.334  | 0.667  | -0.058 | -0.067 |
| A017035_01 | 0.468  | 0.276  | 0.276  | 0.094  | 0.386  | 0.356  | NA     | NA     |
| A017036_01 | 0.21   | 0.098  | -0.09  | 0.02   | -0.055 | -0.009 | 0.059  | -0.09  |
| A017037_01 | -0.011 | -0.019 | 0.262  | 0.165  | -0.202 | -0.183 | -0.151 | -0.097 |
| A017038_01 | -2.924 | -1.743 | -1.168 | -0.789 | -3.572 | -4.297 | -1.96  | -1.909 |
| A017040_01 | -0.042 | 0.315  | 0.079  | -0.168 | NA     | -0.283 | -0.102 | -0.062 |
| A017041_01 | 0.214  | 0.334  | 0.428  | 0.3    | -0.368 | -0.433 | -0.598 | -0.47  |
| A017042_01 | -0.731 | NA     | -0.495 | -0.582 | -0.749 | -0.719 | 0.676  | 0.521  |
| A017044_01 | 0.618  | 0.522  | 0.261  | 0.132  | 0.401  | 0.171  | -0.249 | -0.16  |
| A017045_01 | -0.055 | 0.292  | 0.012  | -0.125 | NA     | -0.03  | -0.08  | 0.009  |
| A017046_01 | 0.173  | 0.127  | -0.18  | 0.041  | 0.285  | 0.583  | 0.06   | 0.105  |
| A017048_01 | -0.444 | -0.407 | -0.176 | -0.215 | -1.108 | -1.271 | -0.377 | -0.45  |
| A017049_01 | -0.324 | -0.4   | 0.037  | -0.082 | -0.442 | -0.52  | -0.265 | -0.343 |
| A017051_01 | -0.087 | NA     | 0.007  | -0.021 | NA     | 0.096  | NA     | -0.04  |
| A017053_01 | 0.3    | 0.062  | -0.018 | 0.178  | -0.309 | -0.337 | -0.091 | -0.185 |
| A017056_01 | -0.044 | NA     | 0.747  | 0.641  | 0.566  | 0.516  | 0.069  | 0.116  |
| A017057_01 | 0.587  | NA     | 0.359  | 0.058  | NA     | NA     | -0.374 | -0.176 |
| A017059_01 | -0.253 | -0.003 | -0.211 | -0.104 | -0.132 | 0.065  | -0.239 | 0.058  |
| A017063_01 | 0.175  | 0.25   | 0.043  | 0.068  | -0.918 | -0.927 | -0.492 | -0.256 |
| A017064_01 | 0.126  | 0.133  | -0.271 | -0.47  | 0.289  | 0.196  | 0.122  | 0.134  |
| A017068_01 | -0.212 | -0.08  | 0.035  | 0.034  | 0.031  | 0.07   | 0.196  | 0.064  |
| A017069_01 | -0.194 | 0.278  | -0.221 | -0.217 | 0.316  | 0.719  | -0.035 | 0.156  |
| A017071_01 | 0.027  | NA     | 0.192  | 0.08   | NA     | NA     | 0.185  | 0.09   |
| A017072_01 | 0.4    | 0.428  | -0.28  | -0.249 | -0.041 | -0.197 | -0.033 | -0.064 |
| A017073_01 | 0.6    | 0.658  | -0.111 | -0.008 | 0.433  | 0.59   | 0.18   | 0.27   |
| A017075_01 | 0.082  | 0.034  | 0.313  | 0.213  | 0.173  | -0.012 | -0.027 | -0.15  |
| A017079_01 | 0.298  | -0.049 | -0.172 | -0.342 | 0.137  | 0.042  | 0.224  | 0.003  |
| A017080_01 | 0.28   | 0.107  | -0.013 | -0.335 | 0.037  | -0.119 | 0.154  | -0.084 |
| A017083_01 | -0.285 | -0.329 | -0.293 | -0.208 | -0.192 | -0.216 | 0.01   | -0.044 |
| A017087_01 | -0.241 | -0.269 | 0.48   | 0.525  | -0.015 | 0.073  | -0.193 | -0.217 |
| A017088_01 | -0.485 | -0.806 | 0.535  | 0.448  | -1.225 | -1.515 | -0.474 | -0.79  |
| A017091_01 | 0.08   | NA     | 0.121  | 0.092  | NA     | -0.66  | 0.2    | -0.116 |
| A017092_01 | -1.272 | -1.189 | -0.497 | -0.535 | -1.647 | -1.943 | -0.831 | -0.963 |
| A017095_01 | -0.876 | NA     | NA     | NA     | NA     | NA     | NA     | -0.33  |
| A017096_01 | 0.515  | 0.279  | 0.253  | 0.286  | -0.001 | 0.012  | 0.006  | -0.316 |
| A017098_01 | 0.159  | 0.321  | -0.296 | -0.281 | -0.09  | -0.132 | -0.014 | 0.014  |
| A017099_01 | 0.097  | 0.06   | -0.038 | -0.046 | 0.239  | 0.227  | 0.055  | 0.023  |
| A017100_01 | -0.198 | 0.002  | -0.078 | -0.075 | -0.017 | 0.263  | -0.077 | -0.191 |
| A017108_01 | 0.01   | NA     | -0.12  | -0.239 | 0.109  | 0.147  | 0.14   | 0.158  |
| A017114_01 | 0.27   | 0.121  | -0.032 | -0.12  | 0.087  | 0.028  | -0.006 | -0.2   |
| A017115_01 | 0.227  | NA     | 0.491  | 0.271  | NA     | 0.009  | -0.102 | -0.241 |
| A017116_01 | -0.14  | -0.221 | 0.284  | 0.321  | -0.956 | -1.124 | -0.623 | -0.829 |
| A017117_01 | NA     | NA     | 0.699  | 0.578  | 0.439  | 0.552  | -0.013 | 0.014  |
| A017120_01 | -0.039 | 0.196  | 0.035  | 0.077  | 0.013  | 0.017  | -0.138 | -0.062 |
| A017122_01 | 0.231  | 0.097  | 0.053  | -0.032 | 0.602  | 0.624  | 0.141  | 0.068  |
| A017127_01 | -0.183 | 0.05   | -0.175 | -0.059 | 0.123  | 0.532  | -0.215 | 0.093  |
| A017128_01 | -0.12  | 0.055  | -0.015 | 0.214  | -0.23  | 0.054  | -0.029 | -0.051 |
| A017130_01 | 0.074  | 0.031  | 0.218  | 0.318  | -0.068 | -0.04  | 0.084  | -0.035 |
| A017135_01 | 0.183  | 0.129  | -0.168 | -0.044 | 0.132  | 0.242  | -0.091 | -0.114 |
| A017138_01 | 0.435  | 0.339  | 0.313  | 0.15   | 0.34   | 0.178  | -0.132 | -0.21  |
| A017139_01 | 0.118  | 0.245  | -0.257 | -0.208 | 0.123  | 0.239  | -0.276 | -0.165 |

|            |    |           |        |           |           |           |           |           |        |
|------------|----|-----------|--------|-----------|-----------|-----------|-----------|-----------|--------|
| A017140_01 |    | -0.298    | -0.094 | -0.174    | -0.232    | 0.012     | 0.354     | -0.254    | 0.05   |
| A017142_01 |    | -0.109    | 0.173  | 0.192     | 0.347     | -0.149    | 0.074     | -0.055    | -0.158 |
| A017149_01 |    | -0.105 NA |        | 0.144     | 0.059     | -0.17     | -0.271 NA | NA        |        |
| A017151_01 |    | 0.313 NA  |        | 0         | 0.135 NA  |           | 0.2 NA    | NA        |        |
| A017153_01 |    | 0.427 NA  |        | -0.114    | -0.085 NA |           | -0.132    | 0.254     | -0.032 |
| A017160_01 |    | 0.427     | 0.538  | 0.444     | 0.608     | 0.483     | 0.891     | -0.242    | -0.189 |
| A017162_01 |    | 0.05      | 0.211  | 0.342     | 0.385     | 0.133     | 0.198     | -0.03     | 0.053  |
| A017173_01 |    | 0.076 NA  |        | 0.442     | 0.185 NA  |           | -0.222 NA | NA        |        |
| A017174_01 |    | -0.029 NA |        | 0.084     | 0.031     | 0.146     | 0.184     | -0.157 NA |        |
| A017178_01 |    | 0.127     | 0.062  | -0.378    | -0.402    | 0.193     | 0.06      | 0.341     | 0.227  |
| A017185_01 |    | -0.21 NA  |        | -0.157    | -0.227    | 0.068     | 0.18 NA   |           | -0.267 |
| A017192_01 |    | -0.169    | 0.002  | -0.032    | -0.166    | -0.031    | -0.141    | -0.106    | 0.08   |
| A017194_01 |    | -0.235    | -0.124 | -0.179    | -0.009    | -0.307    | -0.594    | 0.318     | 0.085  |
| A017195_01 |    | -0.666 NA | NA     | NA        |           | -1.149 NA | NA        |           | -0.158 |
| A017207_01 |    | -0.153    | -0.018 | 0.037     | 0.016     | -0.269    | -0.386    | 0.013     | 0.064  |
| A017227_01 |    | -0.107    | -0.003 | -0.015    | 0.14      | -0.75     | -0.712    | -0.054    | -0.156 |
| A017229_01 |    | -0.313    | -0.404 | -0.059    | 0.01      | -0.247    | -0.202    | 0.193     | 0.198  |
| A017235_01 |    | 0.045     | 0.03   | 0.011     | 0.098     | 0.046     | -0.006    | 0.079     | 0.166  |
| A017240_01 |    | 0.121     | 0.072  | 0.096     | 0.053     | 0.299     | 0.43 NA   | NA        |        |
| A017247_01 |    | -0.194    | 0.125  | -0.286 NA |           | 0.034     | 0.132 NA  | NA        |        |
| A017250_01 |    | 0.185     | 0.45   | 0.911     | 0.586     | -0.201    | -0.077    | -0.541    | -0.238 |
| A017257_01 |    | -0.305    | -0.077 | -0.303    | -0.235    | -0.176    | -0.072    | 0.265     | 0.349  |
| A017258_01 |    | -0.08     | -0.063 | 0.242     | 0.112     | -0.08     | -0.173    | 0.151     | 0.023  |
| A017259_01 |    | 0.411     | 0.146  | -0.098    | -0.046    | -0.211    | -0.34     | 0.204     | 0.179  |
| A017261_01 |    | 0.058 NA  |        | -0.151    | -0.088    | -0.203    | -0.18 NA  |           | -0.129 |
| A017265_01 |    | 0.197     | 0.164  | -0.144    | -0.092    | 0.14      | 0.081     | 0.156     | 0.161  |
| A017266_01 | NA |           | -0.13  | -0.216    | -0.223    | 0.105     | 0.185     | 0.179 NA  |        |
| A017267_01 |    | 0.292     | 0.134  | -0.018    | -0.183    | 0.337     | 0.118     | 0.073     | -0.108 |
| A017268_01 |    | 0.145     | 0.09   | 0.544     | 0.454     | 0.104     | 0.051     | -0.204    | -0.439 |
| A017274_01 |    | -0.27     | -0.184 | -0.066    | -0.088    | -0.101    | -0.16     | -0.088    | -0.056 |
| A017277_01 |    | 0.146     | -0.011 | 0.116     | 0.238     | 0.285     | 0.506     | -0.261    | -0.27  |
| A017279_01 |    | 0.049     | -0.062 | 0.561     | 0.501     | 0.19      | 0.186     | -0.034    | -0.218 |
| A017280_01 |    | 0.07      | -0.067 | 0.041     | -0.036    | -0.065    | -0.033    | 0.039     | -0.111 |
| A017284_01 |    | 0.05      | 0.229  | -0.588    | -0.521    | -0.504    | -0.496    | -0.678    | -0.538 |
| A017285_01 |    | -0.034 NA |        | 0.195     | 0.217 NA  | NA        | NA        |           | -0.185 |
| A017289_01 |    | 0.167     | 0.002  | -0.06     | 0.128     | -0.125    | -0.068    | 0.029     | -0.206 |
| A017293_01 |    | 0.007 NA  |        | -0.003    | -0.074    | -0.918    | -1.03     | -0.124    | -0.359 |
| A017305_01 |    | -0.001    | -0.298 | -0.007    | -0.132    | 0.361     | 0.281     | 0.24      | -0.002 |
| A017306_01 |    | 0.35      | 0.386  | 0.014     | 0.161     | 0.137     | 0.232     | -0.045    | -0.14  |
| A017307_01 | NA |           | -0.069 | -0.117    | -0.203 NA |           | -0.323    | 0.182     | 0.149  |
| A017308_01 |    | -0.011 NA |        | 0.264     | 0.135 NA  |           | 0.062 NA  |           | -0.551 |
| A017311_01 |    | 0.029     | -0.214 | -0.261    | -0.263    | -0.894    | -1.131    | -0.127    | -0.32  |
| A017312_01 |    | 0.145     | 0.177  | -0.141    | -0.063    | -0.005    | 0.049     | -0.034    | 0.005  |
| A017314_01 |    | -0.139 NA |        | 0.052     | -0.224    | -0.26     | -0.375    | 0.182     | 0.207  |
| A017315_01 |    | 0.272     | -0.014 | -0.181    | 0.14      | 0.034     | -0.062 NA |           | -0.192 |
| A017316_01 |    | -0.029    | 0.044  | -0.095    | -0.257    | 0.233     | 0.199     | 0.194     | 0.07   |
| A017321_01 |    | 0.067     | -0.124 | -0.025    | -0.111    | 0.055     | 0.03      | -0.036    | -0.148 |
| A017326_01 |    | 0.103     | 0.098  | -0.143    | -0.513    | -0.204    | -0.362    | -0.212    | -0.119 |
| A017327_01 |    | -0.216 NA |        | -0.262    | -0.517    | 0.149     | -0.064    | 0.263     | 0.115  |
| A017328_01 |    | 0.19      | -0.025 | 0.386     | 0.052     | 0.077     | -0.046 NA |           | -0.175 |
| A017331_01 |    | -0.062    | -0.332 | 0.194     | 0.094     | -0.52     | -0.802    | -0.1      | -0.301 |
| A017335_01 |    | -0.435    | -0.536 | -1.297    | -1.204    | -0.185    | -0.164    | 0.044     | -0.243 |
| A017340_01 |    | 0.027 NA  |        | 0.411     | 0.376     | 0.96      | 1.042 NA  |           | 0.191  |
| A017341_01 |    | 0.064     | -0.006 | -0.282    | 0.032     | -0.337    | -0.392    | -0.204    | -0.19  |
| A017352_01 |    | 0.228     | 0.18   | 0.078     | -0.047    | 0.455     | 0.477     | 0.171     | 0.191  |
| A017353_01 |    | 0.007 NA  |        | -0.341    | -0.364 NA |           | -0.376    | 0.197     | -0.074 |
| A017354_01 |    | 0.229     | 0.148  | 0.342     | 0.334     | -0.28     | -0.332    | -0.132    | -0.351 |
| A017360_01 |    | -0.157    | -0.02  | -0.161    | -0.212    | 0.139     | 0.221     | 0.144     | 0.241  |
| A017361_01 | NA |           | -0.738 | 0.183     | 0.397     | 0.315     | 0.539 NA  | NA        |        |
| A017363_01 |    | -0.271    | -0.271 | -0.465    | -0.138    | -0.427    | -0.294    | 0.363     | 0.356  |
| A017365_01 |    | -0.012 NA |        | 0.146     | -0.166    | -0.008    | -0.125 NA | NA        |        |
| A017378_01 |    | 0.235     | 0.37   | -0.032    | 0.01      | 0.089     | 0.261     | -0.092    | 0.265  |
| A017380_01 |    | -0.25     | -0.631 | 0.244 NA  |           | -0.933    | -0.909 NA | NA        |        |
| A017381_01 |    | -0.16     | -0.008 | -0.25     | -0.037    | -0.022    | 0.206     | 0.068     | 0.018  |
| A017382_01 |    | 0.264 NA  |        | 0.059     | 0.166 NA  |           | -0.054    | 0.182     | 0.005  |
| A017387_01 |    | 0.057     | 0.157  | 0.001     | 0.116     | 0.244     | 0.31      | -0.078    | -0.078 |
| A017389_01 |    | 0.054     | -0.019 | -0.023    | -0.162    | 0.041     | -0.053    | 0.281     | 0.061  |
| A017393_01 |    | 0.151     | 0.331  | 0.21      | -0.242    | 0.34      | 0.44 NA   |           | 0.078  |

|            |           |        |           |           |        |           |           |        |
|------------|-----------|--------|-----------|-----------|--------|-----------|-----------|--------|
| A017394_01 | 0.239     | 0.594  | 0.571     | 0.385     | 0.452  | 0.691     | -0.192    | 0.027  |
| A017396_01 | 0.004     | -0.172 | -0.264    | -0.257    | 0.007  | 0.161     | 0.229     | 0.315  |
| A017405_01 | 0.288 NA  |        | 0.001 NA  |           | 0.372  | 0.164 NA  |           | -0.072 |
| A017413_01 | -0.166    | -0.116 | 0.306     | 0.1       | -0.185 | -0.156 NA | NA        |        |
| A017419_01 | 0.554     | 0.478  | 0.217     | 0.119 NA  |        | 0.023     | -0.19     | -0.213 |
| A017421_01 | -0.179 NA |        | 0.186     | 0.06 NA   | NA     |           | -0.088    | -0.163 |
| A017423_01 | 0.012 NA  |        | 0.154     | 0.245 NA  |        | -0.103    | 0.278     | -0.14  |
| A017425_01 | -0.09 NA  |        | 0.104 NA  | NA        |        | -0.05 NA  | NA        |        |
| A017431_01 | 0.174     | -0.042 | 0.01      | 0.242     | -0.17  | -0.131    | -0.028    | -0.23  |
| A017433_01 | 0.013 NA  |        | -0.159    | -0.004    | -0.267 | -0.368 NA |           | -0.109 |
| A017434_01 | -0.078    | 0.079  | 0.528     | 0.428     | 0.209  | 0.466     | 0.207     | 0.28   |
| A017443_01 | -0.301    | -0.407 | 0.109 NA  |           | -0.073 | -0.274 NA | NA        |        |
| A017451_01 | 0.333 NA  |        | -0.17     | -0.284 NA | NA     | NA        |           | -0.257 |
| A017452_01 | -0.758    | -0.602 | -0.879 NA |           | 0.36   | 0.79 NA   |           | -0.126 |
| A017460_01 | -1.307    | -1.206 | 1.202     | 1.065     | 1.288  | 1.805     | 0.585     | 0.49   |
| A017466_01 | -0.174 NA |        | 0.113     | -0.049    | -0.205 | -0.43     | -0.037    | -0.209 |
| A017468_01 | -0.344    | 0.027  | 0.544     | 0.495     | 0.262  | 0.435     | 0.088     | 0.402  |
| A017471_01 | 0.141     | 0.059  | -0.061    | 0.025     | -0.04  | 0.148     | 0.09      | -0.126 |
| A017476_01 | 0.012 NA  | NA     | NA        |           | -0.002 | -0.11 NA  | NA        |        |
| A017477_01 | 0.002     | 0.104  | 0.151     | -0.229    | 0.721  | 1.092     | 0.014     | 0.34   |
| A017486_01 | 0.192     | -0.078 | -0.157    | -0.183    | 0.17   | -0.002    | 0.296     | 0.147  |
| A017501_01 | -0.21     | -0.17  | -0.098    | -0.441    | -0.274 | -0.558 NA | NA        |        |
| A017502_01 | 0.007     | 0.055  | 0.01      | -0.171    | 0.097  | 0.18 NA   |           | -0.012 |
| A017508_01 | -0.139    | -0.237 | -0.279    | -0.282    | -0.024 | 0.228     | 0.006     | -0.16  |
| A017513_01 | -1.704    | -1.302 | -2.437    | -2.175    | -2.266 | -2.436    | -1.726    | -2.186 |
| A017517_01 | 0.086 NA  |        | -0.093    | -0.422    | -0.109 | -0.308 NA |           | -0.086 |
| A017534_01 | 0.436 NA  |        | 0.525     | 0.454 NA  |        | -0.251    | 0.885     | 0.699  |
| A017549_01 | 0.016 NA  |        | 0.002     | -0.265    | -0.053 | -0.131 NA |           | -0.089 |
| A017558_01 | 0.02 NA   |        | 0.236     | 0.162     | 0.026  | -0.133    | 0.035     | 0.122  |
| A017559_01 | 0.063     | -0.082 | -0.088    | -0.551    | 0.187  | -0.216    | 0.324     | 0.087  |
| A017562_01 | 0.165     | 0.061  | -0.206    | -0.095    | 0.462  | 0.496     | 0.098     | 0.047  |
| A017563_01 | -0.021    | 0.09   | -0.057    | -0.088    | 0.067  | 0.152     | -0.019    | -0.065 |
| A017564_01 | 0.346     | 0.003  | -0.08     | 0.062     | 0.153  | 0.411     | 0.083     | -0.233 |
| A017569_01 | 0.036     | -0.141 | -0.193    | -0.385    | 0.204  | 0.214     | -0.058    | -0.192 |
| A017570_01 | 0.214 NA  |        | -0.04     | 0.049     | 0.119  | 0.051 NA  |           | -0.342 |
| A017575_01 | 0.1       | 0.122  | 0.505     | 0.264     | 0.051  | 0.068 NA  |           | -0.287 |
| A017580_01 | 0.116     | 0.051  | -0.007    | 0.046     | 0.052  | 0.024     | 0.202 NA  |        |
| A017581_01 | -0.045    | 0.096  | -0.089    | 0.039     | 0.06   | 0.367     | -0.109    | 0.001  |
| A017583_01 | -0.002    | 0.148  | -0.302    | -0.225    | 0.046  | 0.075 NA  |           | 0.177  |
| A017587_01 | -0.096 NA |        | 0.265     | 0.098     | 0.124  | 0.039 NA  |           | -0.063 |
| A017589_01 | 0.163     | 0.366  | -0.069    | -0.225    | -0.333 | -0.454    | 0.335     | 0.264  |
| A017593_01 | -0.287    | -0.209 | -0.028    | -0.139    | -0.56  | -0.721    | 0.005     | -0.176 |
| A017595_01 | 0.422     | 0.356  | -0.499    | -0.567    | 0.054  | -0.127    | 0.401     | 0.159  |
| A017597_01 | 0.434     | 0.238  | 0.215     | 0.123     | -0.375 | -0.812    | -0.005    | -0.16  |
| A017600_01 | 0.172     | 0.098  | -0.091    | -0.031    | -0.247 | -0.385    | 0.177     | -0.031 |
| A017604_01 | -0.176    | -0.086 | -0.009    | -0.125    | -0.272 | -0.464    | -0.004 NA |        |
| A017612_01 | 0.015 NA  |        | -0.038    | -0.031 NA | NA     |           | 0.129     | 0.221  |
| A017614_01 | 0.407     | 0.185  | 0.298     | -0.194    | 0.204  | 0.148     | 0.104     | -0.204 |
| A017618_01 | -0.191    | -0.218 | -0.296    | -0.113    | 0.195  | 0.242     | 0.234     | 0.024  |
| A017633_01 | -0.429    | -0.215 | -0.208    | -0.04     | -0.384 | -0.292    | 0.025     | 0.291  |
| A017635_01 | 0.297 NA  |        | 0.328     | -0.135 NA | NA     | NA        |           | -0.112 |
| A017636_01 | 0.277 NA  |        | 0.42      | 0.348     | 0.446  | 0.414     | 0.05      | 0.078  |
| A017637_01 | 0.166 NA  |        | 0.353 NA  | NA        |        | 0.143 NA  | NA        |        |
| A017640_01 | -0.364    | -0.297 | -0.18     | -0.282    | 0.423  | 0.554     | 0.106     | 0.084  |
| A017641_01 | 0.274 NA  |        | -0.019    | 0.07      | -0.266 | -0.284    | -0.077    | -0.085 |
| A017644_01 | 0.296     | 0.094  | -0.089    | -0.177    | 0.194  | 0.12      | 0.183     | -0.008 |
| A017646_01 | -0.043    | -0.299 | 0.089     | 0.111     | 0.167  | 0.564     | -0.003    | 0.056  |
| A017652_01 | 0.35      | 0.218  | -0.081    | 0.165     | 0.643  | 0.852     | 0.014     | -0.016 |
| A017653_01 | 0.231 NA  |        | 0.543     | 0.327     | 0.962  | 0.847 NA  |           | 0      |
| A017656_01 | -0.592    | -0.421 | -0.704    | -0.735    | -0.446 | -0.192    | -0.432    | -0.431 |
| A017657_01 | -0.747    | -0.415 | 0.061     | -0.014    | -0.162 | -0.135    | 0.051     | 0.465  |
| A017659_01 | 0.057     | -0.144 | -0.127    | -0.407    | -0.245 | -0.397    | 0.176     | 0.096  |
| A017664_01 | 0.15      | 0.372  | -0.149    | -0.191    | 0.342  | 0.329     | -0.168    | -0.069 |
| A017667_01 | -0.689    | -0.825 | -0.642    | -0.456    | -0.323 | -0.176    | -0.501    | -0.461 |
| A017668_01 | 0.091 NA  |        | -0.111    | -0.2 NA   |        | -0.356 NA |           | 0.138  |
| A017671_01 | -0.126    | -0.08  | -0.063    | 0.139     | 0.084  | 0.212     | 0.371     | 0.174  |
| A017672_01 | -0.189    | 0.018  | 0.06      | -0.04     | 0.236  | 0.69      | 0         | 0.485  |
| A017692_01 | 0.13      | 0.18   | 0.114     | 0.032 NA  |        | -0.042    | -0.112    | -0.196 |

|            |    |           |           |           |           |        |           |        |        |
|------------|----|-----------|-----------|-----------|-----------|--------|-----------|--------|--------|
| A017693_01 |    | -0.049    | 0.11      | -0.119    | -0.06     | -0.247 | -0.131    | -0.433 | -0.208 |
| A017695_01 |    | 0.461     | 0.106     | 0.521     | 0.289     | 0.912  | 0.987     | -0.351 | -0.457 |
| A017699_01 |    | -0.108    | -0.359    | 0.056     | -0.063    | -0.366 | -0.995    | 0.098  | -0.176 |
| A017701_01 |    | -0.244    | -0.302    | -0.355    | -0.195    | -1.096 | -1.014    | -0.325 | -0.31  |
| A017703_01 |    | 0.243     | 0.049     | 0.074     | -0.215    | 0.152  | -0.045    | 0.208  | -0.05  |
| A017713_01 |    | 0.029     | -0.077    | -0.149    | 0.006     | 0.153  | 0.024     | -0.068 | -0.027 |
| A017714_01 | NA |           | -1.908 NA |           | NA        | NA     | NA        | NA     |        |
| A017715_01 |    | 0.458     | 0.387     | 0.006     | 0.183     | -0.089 | -0.098    | -0.01  | -0.026 |
| A017716_01 |    | -0.194    | -0.292    | -0.215    | -0.293    | -0.152 | -0.24     | 0.011  | -0.15  |
| A017718_01 |    | -0.126 NA |           | 0.022     | 0.16      | 0.09   | -0.045    | 0.122  | 0.029  |
| A017726_01 |    | 0.093 NA  |           | -0.064    | -0.134 NA |        | -0.091    | 0.012  | -0.108 |
| A017734_01 |    | -0.01     | 0.061     | 0.008     | 0.186     | -0.135 | -0.002    | -0.045 | -0.084 |
| A017737_01 |    | 0.736     | 0.571     | -0.991 NA |           | 1.674  | 1.771     | 1.793  | 1.678  |
| A017740_01 |    | 0.17 NA   |           | -0.208 NA |           | 0.14   | 0.399 NA  |        | NA     |
| A017742_01 |    | -0.116    | -0.192    | -0.032    | -0.15     | -0.648 | -0.943    | -0.321 | -0.312 |
| A017743_01 |    | 0.047 NA  |           | -0.201    | -0.273    | 0.239  | 0.236 NA  |        | 0.027  |
| A017746_01 |    | 0.135     | -0.131    | 0.183     | 0.203     | 0.033  | -0.238 NA |        | NA     |
| A017749_01 |    | 0.206 NA  |           | 0.112     | 0.046     | 0.149  | -0.051 NA |        | NA     |
| A017754_01 |    | -0.308 NA |           | 0.043 NA  |           | -0.037 | -0.222 NA |        | 0.075  |
| A017756_01 |    | -0.128    | -0.206    | -0.017    | -0.056    | -0.134 | -0.03     | 0.065  | 0.071  |
| A017757_01 |    | 0.023     | -0.16     | 0.017     | 0.097     | -0.099 | -0.004 NA |        | -0.254 |
| A017758_01 |    | 0.664     | 0.822     | 0.273     | 0.349     | 0.715  | 0.71      | 0.157  | 0.219  |
| A017762_01 |    | 0.19 NA   |           | 0.259     | 0.077     | -0.219 | -0.225 NA |        | 0.055  |
| A017764_01 | NA |           | -0.523    | 0.118     | 0.054     | -0.304 | -0.178 NA |        | -0.284 |
| A017767_01 |    | 0.136 NA  |           | -0.505    | -0.778    | -0.615 | -0.702 NA |        | -0.219 |
| A017768_01 |    | -0.334 NA |           | 0.239     | 0.138     | -0.176 | -0.371    | -0.056 | -0.088 |
| A017769_01 |    | 0.3       | 0.362     | 0.099     | -0.3      | 0.331  | 0.355     | 0.119  | -0.125 |
| A017771_01 |    | 0.112     | 0.04      | -0.067    | -0.079    | -0.023 | -0.008 NA |        | -0.085 |
| A017777_01 |    | 0.209 NA  |           | 0.03 NA   |           | -0.196 | -0.28 NA  |        | 0.044  |
| A017779_01 |    | 0.108     | -0.064    | 0.132     | -0.14     | 0.298  | 0.138     | 0.039  | 0.03   |
| A017782_01 |    | -0.047 NA |           | 0.57      | 0.186 NA  |        | -0.289 NA |        | -0.348 |
| A017783_01 |    | -0.096    | -0.247    | 0.232     | 0.316     | 0.501  | 0.589     | -0.273 | -0.428 |
| A017794_01 |    | -0.13 NA  |           | 0.483     | 0.19 NA   |        | -0.716    | -0.097 | -0.259 |
| A017798_01 |    | 0.04 NA   |           | 0.157     | -0.378    | -0.003 | -0.228 NA |        | -0.038 |
| A017799_01 |    | 0.254     | -0.012    | 0.151     | 0.206     | -0.262 | -0.361    | -0.107 | -0.269 |
| A017801_01 |    | -0.054    | -0.177    | -0.157 NA |           | -0.161 | -0.108 NA |        | -0.209 |
| A017803_01 |    | 0.26      | 0.265     | 0.183     | -0.024    | -0.116 | -0.376    | 0.075  | -0.012 |
| A017807_01 |    | -0.002 NA |           | -0.021    | 0.049     | -0.344 | -0.439 NA |        | -0.065 |
| A017808_01 |    | -0.253    | -0.35     | -0.125    | -0.097    | -0.662 | -0.787    | 0.115  | 0.059  |
| A017812_01 |    | 0.361 NA  |           | 0.237     | 0.118 NA  |        | 0.669 NA  |        | NA     |
| A017813_01 |    | -0.865    | -0.696    | 0.368     | 0.436     | 0.605  | 0.849     | -0.036 | 0.097  |
| A017815_01 |    | -2.136    | -1.842 NA |           | -2.734 NA |        | NA        |        | -2.605 |
| A017824_01 |    | -0.229    | 0.214     | 0.083     | -0.163    | 0.097  | 0.644     | -0.073 | 0.55   |
| A017825_01 |    | 0.062 NA  |           | -0.341 NA |           | -0.043 | -0.085 NA |        | 0.101  |
| A017835_01 |    | 0.134     | 0.073     | -0.288    | -0.017    | 0.209  | 0.382     | 0.189  | 0.192  |
| A017837_01 |    | -0.775    | -0.392    | 0.393     | 0.247     | -0.665 | -0.632    | -0.345 | -0.026 |
| A017839_01 |    | 0.053     | 0.027     | -0.026    | -0.235    | 0.341  | 0.156 NA  |        | 0.217  |
| A017845_01 |    | 0.019 NA  |           | 0.1       | -0.068    | 0.066  | -0.056    | -0.04  | -0.111 |
| A017848_01 |    | 0.099     | 0.007     | -0.021    | -0.029    | 0.324  | 0.24      | 0.017  | -0.208 |
| A017849_01 |    | 0.053 NA  |           | -0.015    | -0.076    | -0.052 | -0.113    | 0.222  | -0.079 |
| A017850_01 |    | 0.102 NA  |           | 0.321 NA  |           | -0.531 | -0.497 NA |        | NA     |
| A017852_01 |    | 0.138     | 0.083     | 0.035     | 0.095     | 0.096  | -0.096    | -0.056 | -0.041 |
| A017855_01 |    | 0.357     | 0.017     | 0.237     | 0.1       | 0.086  | -0.345    | 0.37   | 0.011  |
| A017856_01 |    | -0.399    | -0.114    | -0.17     | -0.261    | 0.003  | 0.292     | 0.153  | 0.403  |
| A017858_01 |    | 0.227     | 0.007     | -0.125 NA |           | 0.37   | 0.474     | 0.167  | 0.173  |
| A017859_01 |    | -0.335    | -0.631    | 0.578     | 0.53      | 0.86   | 1.219     | -0.317 | -0.233 |
| A017860_01 |    | -0.892    | -0.844    | -0.579 NA |           | -0.507 | -0.487 NA |        | NA     |
| A017861_01 |    | -0.055    | -0.248    | -0.236    | -0.062    | 0.023  | 0.155     | 0.262  | 0.176  |
| A017863_01 |    | -0.1      | -0.039    | -0.176    | -0.312    | -0.158 | -0.028    | -0.137 | 0.06   |
| A017866_01 |    | 0.203     | -0.049 NA |           | NA        | 0.012  | 0.054 NA  |        | NA     |
| A017867_01 |    | -0.013    | 0.105     | -0.174    | -0.339    | 0.107  | 0.183     | 0.294  | 0.376  |
| A017868_01 |    | 0.54      | 0.441     | 0.061     | 0.05      | 0.094  | 0.158     | 0.055  | -0.028 |
| A017869_01 |    | -0.014    | -0.092    | -0.182    | -0.44     | 0.139  | 0.091     | -0.026 | -0.046 |
| A017871_01 | NA | NA        | NA        |           | -0.497 NA |        | -0.069 NA |        | NA     |
| A017872_01 |    | 0.025     | 0.325     | -0.187    | -0.258    | 0.383  | 0.587     | -0.052 | 0.249  |
| A017873_01 |    | -0.083    | -0.13     | -0.124    | -0.172    | -0.191 | -0.2      | -0.08  | 0.005  |
| A017874_01 |    | -0.038    | 0.037     | 0.06      | -0.076    | 0.161  | 0 NA      |        | -0.257 |
| A017877_01 |    | 0.083     | 0.424     | 0.134     | 0.183     | 0.209  | 0.385     | 0.201  | 0.413  |

|            |    |           |        |          |           |        |           |        |        |
|------------|----|-----------|--------|----------|-----------|--------|-----------|--------|--------|
| A017878_01 |    | 0.037     | -0.16  | 0.04     | -0.102    | 0.18   | 0.153     | -0.091 | -0.136 |
| A017880_01 |    | 0.003     | -0.243 | 0.115    | 0.06      | -0.093 | -0.095    | -0.225 | -0.442 |
| A017882_01 |    | -0.344    | -0.206 | -0.032   | -0.209    | -0.088 | -0.017    | -0.239 | -0.057 |
| A017885_01 |    | -0.64     | -0.731 | 0.374    | 0.32      | 0.396  | 0.612 NA  | NA     |        |
| A017886_01 |    | -0.057    | -0.089 | -0.078   | -0.026    | -0.029 | 0.089     | 0.146  | 0.101  |
| A017887_01 |    | -0.085 NA | NA     |          | -0.068    | 0.268  | 0.235 NA  | NA     |        |
| A017890_01 |    | 0.516     | 0.327  | -0.296   | -0.199    | -0.276 | -0.467 NA |        | -0.375 |
| A017892_01 |    | 0.061     | 0.024  | 0.131    | -0.024    | 0.07   | -0.025    | -0.002 | 0.009  |
| A017894_01 |    | -0.376    | -0.291 | 0.109    | 0.166     | -1.178 | -1.304    | -0.355 | -0.37  |
| A017897_01 |    | -0.083 NA |        | 0.191    | 0.041     | -0.435 | -0.549 NA |        | -0.437 |
| A017899_01 |    | 0.012 NA  |        | -0.065   | -0.133 NA |        | -0.293    | 0.181  | -0.098 |
| A017900_01 |    | -0.018 NA |        | 0.398    | 0.534 NA  |        | 0.201     | -0.094 | -0.305 |
| A017901_01 |    | 0.254     | -0.013 | 0.053    | -0.09     | 0.124  | 0.04 NA   | NA     |        |
| A017902_01 |    | 0.29      | 0.334  | 0.358    | 0.31      | 0.186  | 0.302     | -0.238 | -0.21  |
| A017904_01 |    | -1.505    | -1.41  | -0.407   | -0.354    | -1.908 | -2.033 NA | NA     |        |
| A017909_01 |    | 0.15      | -0.092 | -0.135   | -0.161    | 0.058  | 0.124     | 0.119  | -0.107 |
| A017913_01 |    | 0.529     | 0.351  | -0.374   | -0.299    | 0.067  | 0.023     | 0.201  | 0.217  |
| A017915_01 |    | -0.453 NA |        | 0.238 NA |           | -0.933 | -1.106 NA | NA     |        |
| A017916_01 | NA | NA        |        | 0.473    | 0.426     | 0.773  | 0.808     | -0.006 | -0.09  |
| A017918_01 |    | 0.027 NA  |        | 0.206    | -0.096 NA | NA     |           | 0.136  | 0.18   |
| A017920_01 |    | -0.105    | -0.092 | 0.13     | 0.159     | -0.024 | 0.052     | -0.087 | -0.099 |
| A017922_01 |    | 0.306     | 0.132  | 0.321    | 0.287     | 0.212  | 0.18      | 0.027  | -0.151 |
| A017923_01 |    | -0.241    | -0.245 | -0.138   | -0.255    | 0.063  | 0.177     | -0.078 | -0.115 |
| A017924_01 |    | 0.576     | 0.451  | -0.516   | -0.326    | -1.345 | -1.814    | 0.463  | 0.321  |
| A017925_01 |    | -0.119    | -0.076 | -0.285   | -0.36     | 0.122  | 0.418     | 0.127  | 0.154  |
| A017928_01 |    | 0.128     | 0.108  | 0.138    | -0.072    | -0.091 | -0.14     | -0.027 | 0.003  |
| A017933_01 |    | -0.392    | -0.346 | -0.129   | -0.129    | -0.701 | -0.887    | 0.064  | -0.094 |
| A017934_01 |    | 0.356     | 0.255  | 0.084    | 0.141     | 0.036  | -0.146 NA | NA     |        |
| A017935_01 |    | 0.568     | 0.391  | 0.101    | -0.034    | 0.406  | 0.378     | 0.049  | -0.077 |
| A017936_01 |    | 0.12      | 0.18   | -0.436   | -0.626    | 0.257  | 0.227     | -0.256 | -0.2   |
| A017937_01 |    | -0.033    | -0.048 | 0.109    | -0.017    | 0.145  | 0.156 NA  | NA     |        |
| A017938_01 |    | 0.501     | 0.329  | 0.555    | 0.53      | 0.242  | -0.001    | 0.05   | -0.137 |
| A017942_01 |    | -1.67     | -1.708 | -1.85    | -1.9      | -3.363 | -3.983    | -2.222 | -2.22  |
| A017945_01 |    | 0.114     | 0.167  | 0.094    | 0.057     | -0.081 | -0.128    | 0.022  | -0.076 |
| A017949_01 | NA |           | -0.056 | 0.362    | 0.221     | -0.163 | -0.195    | -0.042 | -0.106 |
| A017950_01 |    | -0.309    | -0.46  | 0.041    | 0.035     | -0.188 | -0.043    | 0.132  | 0.184  |
| A017951_01 |    | -0.241    | -0.329 | 0.389    | 0.172     | -0.183 | -0.234    | 0.101  | -0.104 |
| A017952_01 |    | 0.037     | 0.185  | 0.029    | -0.03     | 0.105  | 0.061     | 0.141  | 0.226  |
| A017955_01 |    | -0.226    | 0.065  | 0.481    | 0.475     | 0.008  | 0.132     | -0.419 | -0.31  |
| A017957_01 |    | 0.482     | 0.089  | -0.134   | 0.009     | 0.216  | 0.441     | 0.332  | 0.227  |
| A017962_01 |    | -0.035    | 0.155  | 0.096    | -0.032    | 0.088  | 0.191     | -0.049 | 0.044  |
| A017965_01 |    | 0.268     | 0.189  | 0.005    | -0.162    | -0.114 | -0.307    | -0.026 | -0.265 |
| A017967_01 |    | -0.029    | 0.347  | -0.399   | -0.263    | 0.057  | 0.328     | 0.216  | 0.514  |
| A017971_01 |    | -0.355    | -0.064 | 0.034    | -0.081    | -0.669 | -0.463    | -0.364 | -0.074 |
| A017972_01 |    | -0.228    | -0.072 | -0.099   | -0.159    | -0.358 | -0.521 NA | NA     |        |
| A017974_01 |    | 0.144     | 0.178  | -0.25    | 0.129     | -0.048 | 0.073     | 0.001  | -0.007 |
| A017975_01 |    | 0.252     | 0.475  | 0.246    | 0.144     | 0.363  | 0.207     | 0.138  | 0.183  |
| A017977_01 |    | 0.227     | 0.269  | -0.346   | -0.29     | 0.231  | 0.324     | 0.088  | 0.157  |
| A017979_01 |    | 0.016     | 0.126  | -0.159   | -0.33     | 0.458  | 0.442     | -0.428 | 0.007  |
| A017980_01 |    | -0.134    | -0.021 | 0.241    | 0.024     | 0.075  | 0.278     | -0.207 | -0.171 |
| A017982_01 |    | 0.019     | 0.036  | 0.031    | 0.039     | 0.431  | 0.495     | 0.129  | 0.182  |
| A017983_01 |    | 0.353     | 0.14   | 0.436    | 0.233     | 1.023  | 1.317     | 0.389  | 0.56   |
| A017985_01 |    | 0.123     | 0.242  | 0.086    | -0.12     | -0.352 | -0.363 NA |        | -0.045 |
| A017987_01 |    | 0.178     | -0.037 | -0.058   | 0.098     | 0.252  | 0.362     | 0.2    | 0.019  |
| A017991_01 |    | 0.015     | 0.094  | 0.044    | -0.006    | 0.119  | 0.076     | -0.078 | 0.039  |
| A017993_01 |    | 0.225     | 0.314  | -0.005   | 0.25      | 0.221  | 0.367     | -0.325 | -0.194 |
| A017994_01 |    | 0.059 NA  |        | -0.099   | -0.238    | -0.104 | -0.115 NA |        | -0.144 |
| A017995_01 |    | -0.908    | -0.821 | 0.969    | 0.919     | 1.243  | 1.914     | 0.45   | 0.335  |
| A017996_01 |    | 0.086     | 0.062  | -0.049   | -0.006    | 0.036  | -0.045    | -0.041 | -0.007 |
| A018000_01 |    | -0.291    | -0.064 | 0.049    | -0.131    | -0.288 | -0.289    | -0.38  | -0.091 |
| A018004_01 |    | -0.152    | -0.184 | -0.047   | 0.011     | -0.024 | -0.034    | 0.047  | -0.115 |
| A018006_01 |    | -2.671    | -1.613 | 0.904    | 0.7       | -3.31  | -4.115    | -1.326 | -1.307 |
| A018011_01 |    | 0.093     | 0.11   | 0.138    | 0.025     | 0.133  | -0.08     | -0.118 | -0.066 |
| A018016_01 |    | -0.056    | 0.17   | 0.263    | 0.27      | 0.008  | 0.009     | -0.362 | -0.336 |
| A018017_01 |    | 0.029     | 0.072  | -0.002   | -0.206    | -0.086 | -0.268    | 0.056  | 0.051  |
| A018019_01 |    | -0.446    | -0.055 | 0.043    | 0.151     | -1.613 | -1.801    | -0.112 | 0.123  |
| A018022_01 |    | -0.24     | -0.101 | 0.051    | -0.201    | -0.04  | -0.182    | 0.075  | -0.033 |
| A018025_01 |    | -0.004    | -0.056 | 0.619    | 0.373     | 0.353  | 0.326     | 0.112  | 0.034  |

|            |           |          |           |           |        |           |        |        |
|------------|-----------|----------|-----------|-----------|--------|-----------|--------|--------|
| A018028_01 | -0.383    | -0.239   | 0.011     | 0.021     | -1.174 | -1.379    | -0.34  | -0.319 |
| A018029_01 | 0.235     | 0.135    | -0.087    | -0.078    | -0.059 | -0.133    | 0.127  | -0.021 |
| A018032_01 | -0.918    | -0.874   | -1.37     | -1.157    | 0.86   | 1.311     | 0.028  | -0.201 |
| A018034_01 | 0.269     | 0.265 NA | NA        |           | 0.494  | 0.556 NA  |        | 0.48   |
| A018038_01 | 0.528     | 0.322    | 0.143     | 0.414     | 0.192  | 0.144     | 0.067  | -0.059 |
| A018041_01 | 0.183     | 0.252    | -0.007    | 0.008     | -1.695 | -2.343    | -0.039 | 0.008  |
| A018042_01 | -0.108 NA |          | 0.233     | 0.15      | -0.5   | -0.606    | -0.017 | -0.088 |
| A018043_01 | 0.094     | 0.215    | -0.035    | -0.03     | 0.103  | 0.16      | 0.03   | -0.095 |
| A018046_01 | 0.129     | 0.317    | 0.427     | 0.308     | -0.265 | -0.454    | -0.133 | -0.088 |
| A018047_01 | -0.07     | 0.02     | 0.289     | 0.339     | 0.415  | 0.464     | -0.11  | -0.032 |
| A018048_01 | -0.064    | 0.181    | 0.089     | 0.023     | -0.174 | -0.102    | 0.098  | 0.023  |
| A018049_01 | -0.457    | -0.377   | 0.074     | 0.052     | -0.169 | -0.117    | -0.121 | -0.008 |
| A018052_01 | 0.3       | 0.231    | 0.041     | 0.068     | 0.582  | 0.664     | 0.151  | 0.06   |
| A018054_01 | -0.132    | 0.071    | -0.138    | -0.211    | 0.045  | 0.326 NA  | NA     |        |
| A018058_01 | 0.453     | 0.51     | 0.37      | 0.337     | 0.267  | 0.165     | 0.439  | 0.283  |
| A018060_01 | -0.185    | -0.216   | -0.046    | 0.189     | -0.414 | -0.399    | -0.131 | -0.181 |
| A018062_01 | 0.303 NA  |          | 0.415     | 0.341 NA  |        | -0.132 NA | NA     |        |
| A018064_01 | -0.363    | 0.046    | -0.021    | -0.118    | 0.118  | 0.224     | -0.028 | 0.137  |
| A018065_01 | 0.149     | 0.197    | 0.022     | 0.104     | -0.318 | -0.334    | -0.592 | -0.576 |
| A018066_01 | 0.753     | 1.006    | -0.121    | -0.229    | 0.173  | 0.267     | -0.115 | -0.008 |
| A018067_01 | -0.305    | -0.222   | 0.315     | 0.306     | 0.065  | 0.179     | -0.039 | -0.204 |
| A018068_01 | 0.128     | 0.256    | -0.196    | -0.194    | -0.013 | 0.179     | -0.177 | -0.05  |
| A018069_01 | -0.14     | -0.182   | -0.135    | -0.07     | -0.231 | -0.123    | 0.078  | 0.074  |
| A018070_01 | 0.331     | 0.508    | -0.024    | 0.094     | 0.012  | -0.104    | -0.023 | -0.119 |
| A018071_01 | -0.322 NA |          | -0.167    | -0.229 NA |        | -0.764 NA |        | -0.564 |
| A018072_01 | -0.464    | -0.348   | -0.257    | -0.162    | -0.292 | -0.029    | -0.033 | 0.094  |
| A018074_01 | 0.224 NA  |          | -0.033    | -0.133    | 0.633  | 0.878     | 0.118  | 0.196  |
| A018076_01 | 0.323 NA  |          | -0.04     | 0.113 NA  |        | -0.384 NA |        | -0.122 |
| A018080_01 | -0.053    | -0.06    | -0.251    | -0.195    | -0.26  | -0.264    | 0.34   | 0.466  |
| A018081_01 | 0.229     | 0.095    | 0.106     | 0.04      | -0.39  | -0.552    | 0.195  | -0.195 |
| A018085_01 | 0.052     | 0.09     | -0.095    | -0.107    | -0.014 | 0.038 NA  | NA     |        |
| A018088_01 | -0.089    | 0.068    | 0.151     | 0.246     | 0.01   | -0.15     | -0.087 | -0.118 |
| A018089_01 | 0.451     | 0.342    | 0.133     | 0.065     | 0.496  | 0.5       | -0.079 | -0.032 |
| A018092_01 | -0.011    | 0.096    | 0.011     | -0.296    | 0.161  | 0.102     | 0.047  | 0.139  |
| A018093_01 | NA        | NA       | 0.361     | 0.16      | 0.144  | 0.086     | 0.156  | -0.018 |
| A018097_01 | NA        |          | 0.437     | 0.266 NA  |        | 0.105 NA  | NA     |        |
| A018098_01 | 0.364     | 0.239    | 0.177     | 0.04      | 0.247  | 0.069     | -0.066 | -0.07  |
| A018099_01 | 0.224     | 0.109    | 0.156     | 0.165     | 0.243  | 0.286     | -0.182 | -0.255 |
| A018100_01 | 0.319     | 0.119    | -0.022    | -0.103    | -0.399 | -0.802    | -0.992 | -1.202 |
| A018101_01 | 0.298     | 0.127    | -0.034    | 0.081     | 0.1    | 0.206     | 0.412  | 0.288  |
| A018102_01 | -0.06 NA  |          | 0.137     | 0.059     | 0.049  | -0.086 NA | NA     |        |
| A018103_01 | 0.227     | 0.413    | -0.297    | -0.394    | 0.278  | 0.251     | 0.184  | 0.446  |
| A018104_01 | 0.002     | -0.126   | 0.081     | -0.023    | -0.326 | -0.384    | 0.1    | 0.069  |
| A018105_01 | 0.025     | -0.005   | -0.551    | -0.354    | 0.176  | 0.369     | 0.674  | 0.726  |
| A018106_01 | 0.562     | 0.092    | 0.55      | 0.216     | 0.104  | -0.187    | -0.053 | -0.296 |
| A018107_01 | 0.069     | 0.057    | -0.179    | -0.068    | 0.354  | 0.548     | 0.133  | 0.027  |
| A018108_01 | 0.311 NA  |          | 0.245     | 0.186 NA  |        | -0.118 NA | NA     |        |
| A018110_01 | 0.246     | 0.127    | -0.147    | 0.012     | 0.382  | 0.495     | 0.044  | -0.036 |
| A018111_01 | 0.343     | 0.231    | 0.251     | 0.088     | 0.4    | 0.429     | -0.119 | -0.262 |
| A018115_01 | 0.241     | 0.067    | 0.155     | 0.224     | 0.35   | 0.446     | 0.137  | 0.168  |
| A018117_01 | -0.294    | -0.304   | -0.061    | -0.308    | 0.056  | 0.038     | 0.295  | 0.479  |
| A018119_01 | -0.048    | -0.097   | 0.13      | 0.165     | -0.256 | -0.418    | -0.171 | -0.249 |
| A018126_01 | -0.175    | -0.219   | -0.12     | -0.118    | -0.281 | -0.118    | 0.058  | -0.103 |
| A018128_01 | 0.297     | 0.236    | -0.034    | -0.237    | -0.037 | -0.183 NA |        | 0.009  |
| A018135_01 | 0.105     | -0.135   | -0.217 NA |           | 0.06   | -0.074 NA |        | -0.37  |
| A018139_01 | 0.224     | 0.14     | -0.015    | -0.215    | 0.766  | 0.791     | 0.141  | 0.137  |
| A018147_01 | 0.126     | 0.204    | 0.289     | 0.527     | -0.05  | -0.013    | -0.116 | -0.255 |
| A018151_01 | 0.097     | 0.032    | -0.075    | -0.047    | 0.111  | 0.101     | 0.027  | 0.048  |
| A018153_01 | 0.157 NA  |          | 0.018     | 0.001 NA  |        | -0.127    | 0.246  | 0.126  |
| A018154_01 | 0.134     | 0.215    | 0.058     | -0.029    | 0.355  | 0.602     | 0.188  | 0.319  |
| A018155_01 | NA        | NA       | -0.112    | 0.019 NA  |        | -0.018    | 0.067  | -0.097 |
| A018156_01 | -0.063    | -0.03    | -0.291    | -0.117    | 0.373  | 0.604     | -0.135 | -0.21  |
| A018157_01 | -0.007    | 0.25     | -0.278    | -0.244    | -0.197 | -0.131    | -0.466 | -0.218 |
| A018159_01 | 0.325     | 0.417    | -0.126    | -0.071    | 0.129  | 0.383     | -0.116 | -0.041 |
| A018163_01 | -1.03 NA  |          | 0.079     | -0.087    | 1.254  | 1.69      | 0.736  | 0.885  |
| A018171_01 | 0.031     | -0.093   | -0.28     | -0.306    | 0.137  | 0.284     | 0.399  | 0.213  |
| A018174_01 | 0.096     | -0.008   | 0.1       | -0.033    | -0.327 | -0.735    | 0.2    | 0.049  |
| A018175_01 | 0.402     | 0.583    | 0.229     | 0.148     | 0.155  | 0.174     | 0.088  | 0.068  |

|            |        |        |    |        |        |        |        |        |        |
|------------|--------|--------|----|--------|--------|--------|--------|--------|--------|
| A018176_01 | 0.203  | NA     | NA | 0.433  | 0.051  | 0.146  | NA     | NA     |        |
| A018179_01 | 0.344  | NA     |    | 0.071  | 0.077  | NA     | -0.077 | 0.172  | -0.198 |
| A018182_01 | -0.007 | NA     |    | -0.131 | -0.221 | 0.009  | 0.147  | -0.084 | -0.157 |
| A018183_01 | -0.115 | -0.024 |    | -0.213 | -0.051 | 0.177  | 0.483  | 0.259  | 0.471  |
| A018185_01 | 0.139  | 0.097  |    | -0.049 | -0.037 | 0.119  | 0.202  | -0.163 | -0.246 |
| A018189_01 | 0.473  | 0.81   |    | -0.122 | 0.001  | 0.476  | 0.686  | 0.151  | 0.276  |
| A018193_01 | 0.268  | NA     | NA | NA     |        | -0.274 | -0.151 | NA     | NA     |
| A018195_01 | 0.117  | 0.171  |    | -0.461 | -0.157 | -0.005 | 0.176  | 0.162  | 0.083  |
| A018200_01 | 0.288  | NA     |    | -0.055 | 0.071  | 0.204  | 0.061  | 0.312  | 0.034  |
| A018204_01 | NA     | NA     |    | 0.118  | 0.203  | NA     | -0.164 | -0.083 | NA     |
| A018205_01 | 0.579  | 0.165  |    | 0.178  | 0.225  | 0.045  | -0.147 | NA     | -0.11  |
| A018206_01 | 0.235  | 0.37   |    | 0.248  | -0.216 | 0.482  | 0.487  | 0.392  | 0.293  |
| A018207_01 | 0.253  | 0.338  |    | 0.331  | 0.054  | 0.302  | 0.21   | -0.071 | -0.052 |
| A018210_01 | 0.078  | 0.157  |    | 0.162  | 0.242  | NA     | -0.176 | -0.068 | -0.061 |
| A018211_01 | -0.217 | -0.419 |    | -0.138 | -0.067 | -0.219 | -0.077 | -0.078 | -0.09  |
| A018214_01 | -0.026 | 0.14   |    | -0.058 | -0.077 | 0.339  | 0.579  | -0.006 | 0.078  |
| A018216_01 | 0.047  | 0.088  | NA | NA     | NA     |        | 0.087  | NA     | NA     |
| A018226_01 | 0.082  | NA     |    | -0.209 | -0.231 | NA     | -0.072 | 0.293  | 0.288  |
| A018234_01 | 0.02   | NA     |    | -0.38  | NA     | NA     | 0.002  | NA     | NA     |
| A018237_01 | -0.539 | -0.855 |    | -0.157 | -0.223 | -0.365 | -0.211 | -0.234 | -0.328 |
| A018239_01 | -0.765 | NA     |    | 0.458  | 0.174  | 1.008  | 1.184  | NA     | NA     |
| A018240_01 | 0.263  | 0.445  |    | 0.181  | -0.059 | -0.2   | -0.405 | -0.231 | -0.294 |
| A018241_01 | 0.075  | 0.008  |    | 0.051  | 0.056  | 0.041  | -0.125 | 0.214  | 0.228  |
| A018242_01 | 0.164  | NA     | NA |        | -0.063 | -0.097 | -0.145 | 0.131  | -0.19  |
| A018243_01 | 0.109  | -0.058 |    | 0.292  | 0.105  | 0.172  | 0.188  | 0.131  | 0.04   |
| A018248_01 | 0.247  | NA     |    | -0.165 | 0.071  | -0.285 | -0.229 | 0.041  | NA     |
| A018249_01 | 0.374  | NA     | NA |        | -0.385 | NA     | NA     | 0.418  | 0.225  |
| A018251_01 | 0.328  | 0.487  |    | 0.299  | 0.002  | -0.523 | -0.768 | -0.895 | -0.873 |
| A018253_01 | -0.046 | NA     |    | 0.014  | -0.187 | 0.085  | -0.055 | 0.111  | -0.025 |
| A018254_01 | -0.032 | -0.076 |    | 0.182  | 0.021  | -0.036 | -0.184 | 0.073  | -0.069 |
| A018256_01 | -0.12  | NA     |    | 0.224  | 0.262  | -0.626 | -0.793 | -0.039 | -0.207 |
| A018258_01 | 0.149  | 0.177  |    | 0.185  | 0.068  | 0.519  | 0.456  | 0.064  | 0.073  |
| A018259_01 | -0.325 | -0.437 |    | -0.213 | -0.249 | 0.803  | 1.113  | 0.136  | -0.095 |
| A018264_01 | 0.094  | 0.038  |    | -0.16  | -0.273 | 0.068  | 0.135  | 0.165  | 0.155  |
| A018266_01 | 0.184  | 0.085  |    | 0.02   | -0.07  | 0.317  | 0.191  | -0.023 | -0.19  |
| A018267_01 | 0.081  | 0.258  |    | -0.009 | -0.196 | 0.216  | 0.305  | 0.063  | 0.172  |
| A018269_01 | 0.16   | 0.147  |    | 0.229  | 0.222  | -0.581 | -0.825 | -0.068 | -0.408 |
| A018270_01 | 0.174  | 0.329  |    | 0.143  | 0.005  | 0.516  | 0.603  | -0.421 | -0.535 |
| A018272_01 | 0.017  | 0.101  |    | -0.158 | -0.28  | 0.59   | 0.631  | 0.102  | 0.15   |
| A018273_01 | 0.185  | 0.093  |    | 0.087  | -0.134 | 0.062  | -0.103 | -0.093 | -0.117 |
| A018276_01 | -0.317 | -0.245 |    | -0.247 | -0.233 | -0.317 | -0.274 | 0.151  | -0.082 |
| A018277_01 | -0.069 | -0.162 |    | 0.118  | -0.131 | -0.976 | -0.986 | -0.621 | -0.664 |
| A018280_01 | 0.286  | 0.114  |    | -0.015 | 0.007  | 0.469  | 0.544  | 0.319  | 0.246  |
| A018297_01 | -0.599 | -0.529 |    | -0.084 | -0.094 | -0.507 | -0.474 | -0.087 | -0.057 |
| A018300_01 | -0.26  | -0.24  |    | 0.126  | 0.263  | -0.872 | -0.786 | 0.014  | 0.092  |
| A018304_01 | -0.153 | NA     |    | -0.191 | NA     | 0.07   | 0.086  | 0.108  | NA     |
| A018307_01 | -0.065 | 0.264  |    | 0.112  | 0.066  | 0.386  | 0.467  | 0.006  | -0.014 |
| A018308_01 | 0.262  | 0.355  |    | -0.372 | -0.62  | -0.482 | -0.656 | -0.619 | -0.429 |
| A018312_01 | -0.207 | -0.068 |    | 0      | -0.104 | -0.24  | -0.402 | NA     | -0.157 |
| A018314_01 | 0.192  | -0.046 |    | -0.264 | -0.223 | 0.248  | 0.28   | 0.135  | 0.114  |
| A018315_01 | 0.017  | NA     |    | 0.287  | 0.031  | 0.02   | 0.022  | -0.133 | -0.303 |
| A018319_01 | 0.69   | 0.552  |    | -0.419 | -0.302 | -0.237 | -0.332 | 0.213  | -0.189 |
| A018321_01 | -0.067 | NA     | NA |        | -0.171 | 0.12   | 0.148  | NA     | NA     |
| A018323_01 | 0.042  | -0.021 |    | 0.233  | -0.046 | -0.276 | -0.471 | NA     | 0.251  |
| A018330_01 | 0.25   | 0.05   |    | 0.116  | NA     | 0.016  | -0.121 | NA     | -0.14  |
| A018334_01 | -0.005 | 0.112  |    | -0.088 | 0.18   | -0.278 | -0.21  | 0.088  | -0.032 |
| A018338_01 | -0.011 | 0.048  |    | 0.027  | -0.32  | 0.282  | 0.238  | 0.096  | 0.14   |
| A018340_01 | 0.436  | 0.212  |    | -0.045 | -0.186 | NA     | -0.022 | NA     | NA     |
| A018343_01 | 0.116  | NA     |    | 0.272  | 0.02   | -0.4   | -0.672 | NA     | NA     |
| A018344_01 | NA     | NA     |    | -0.261 | -0.385 | -0.352 | -0.43  | 0.184  | -0.097 |
| A018348_01 | 0.519  | 0.429  |    | -0.469 | -0.262 | 0.076  | 0.226  | -0.049 | -0.123 |
| A018349_01 | -0.505 | NA     |    | 0.452  | 0.304  | 0.088  | 0.232  | -0.486 | -0.501 |
| A018354_01 | -0.021 | 0.021  |    | -0.03  | -0.208 | 0.392  | 0.419  | NA     | -0.311 |
| A018355_01 | -0.658 | NA     |    | -0.031 | -0.222 | 0.167  | 0.019  | NA     | -0.516 |
| A018357_01 | 0      | 0.013  |    | 0.307  | 0.002  | 0.157  | 0.14   | 0.112  | 0.103  |
| A018358_01 | -0.148 | 0.357  |    | 0.252  | 0.151  | -0.346 | -0.071 | -0.092 | 0.196  |
| A018362_01 | 0.175  | NA     |    | -0.251 | -0.243 | 0.192  | 0.142  | 0.46   | 0.417  |
| A018371_01 | 0.058  | NA     |    | 0.038  | -0.012 | NA     | 0.21   | NA     | 0.103  |

|            |        |        |        |        |        |        |        |    |        |
|------------|--------|--------|--------|--------|--------|--------|--------|----|--------|
| A018373_01 | 0.252  | 0.215  | 0.497  | 0.34   | 0.365  | 0.313  | NA     | NA |        |
| A018377_01 | 0.103  | -0.234 | -0.082 | -0.195 | -0.127 | -0.289 | 0.136  |    | -0.028 |
| A018384_01 | 0.278  | NA     | 0.27   | 0.018  | 0.334  | 0.241  | NA     |    | -0.288 |
| A018386_01 | 0.179  | 0.238  | 0.04   | -0.155 | 0.184  | 0.184  | 0.307  |    | 0.398  |
| A018393_01 | -0.442 | NA     | -0.05  | -0.114 | -0.085 | -0.016 | NA     | NA |        |
| A018395_01 | -0.223 | -0.423 | 0.082  | 0.04   | -0.761 | -0.884 | -0.068 |    | -0.285 |
| A018397_01 | -0.009 | 0.335  | -0.007 | -0.024 | 0.365  | 0.393  | -0.174 |    | -0.084 |
| A018399_01 | 0.038  | 0.073  | -0.102 | -0.1   | -0.044 | 0.14   | 0.011  |    | 0.092  |
| A018406_01 | 0.109  | 0.051  | -0.208 | -0.04  | 0.107  | 0.051  | 0.188  |    | 0.066  |
| A018411_01 | 0.01   | 0.047  | -0.145 | -0.258 | 0.044  | -0.015 | NA     | NA |        |
| A018412_01 | -0.133 | 0.135  | -0.251 | -0.065 | 0.093  | 0.169  | -0.003 |    | 0.193  |
| A018421_01 | -0.15  | -0.002 | 0.125  | 0.051  | -0.291 | -0.033 | 0.007  |    | 0.235  |
| A018423_01 | 0.209  | 0.008  | 0.14   | -0.058 | 0.53   | 0.644  | 0.038  |    | -0.087 |
| A018426_01 | 0.024  | -0.2   | -0.079 | -0.26  | 0.091  | -0.061 | 0.262  |    | 0.119  |
| A018427_01 | -0.132 | -0.072 | -0.248 | -0.286 | -0.124 | 0.022  | 0.144  |    | 0.049  |
| A018428_01 | -0.282 | NA     | -0.092 | 0.018  | -0.874 | -0.95  | NA     | NA |        |
| A018432_01 | 0.276  | 0.045  | 0.181  | 0.119  | 0.34   | 0.178  | 0.215  |    | -0.251 |
| A018440_01 | 0.181  | 0.117  | -0.045 | -0.036 | 0.5    | 0.689  | 0.015  |    | 0.028  |
| A018442_01 | -0.037 | -0.117 | 0.229  | 0.172  | 0.158  | 0.377  | -0.171 |    | -0.281 |
| A018445_01 | 0.019  | NA     | -0.012 | -0.245 | NA     | -0.368 | NA     |    | -0.202 |
| A018446_01 | 0.245  | NA     | 0.05   | -0.167 | NA     | -0.152 | 0.188  |    | -0.002 |
| A018448_01 | -0.071 | -0.246 | 0.006  | -0.047 | -0.465 | -0.633 | 0.326  |    | 0.119  |
| A018450_01 | -0.671 | -0.688 | -0.292 | -0.059 | -2.093 | -2.543 | -0.959 |    | -1.171 |
| A018454_01 | 0.137  | -0.16  | -0.171 | -0.057 | 0.192  | 0.117  | NA     |    | 0.124  |
| A018460_01 | 0.248  | 0.095  | -0.01  | -0.056 | 0.247  | 0.12   | NA     |    | -0.149 |
| A018461_01 | -0.299 | 0.108  | -0.249 | -0.551 | 0.259  | 0.347  | 0.256  |    | 0.42   |
| A018466_01 | -0.165 | NA     | 0.147  | -0.008 | 0.269  | 0.294  | NA     |    | -0.03  |
| A018467_01 | -0.82  | NA     | -0.454 | NA     | NA     | NA     | NA     |    | -1.032 |
| A018477_01 | -0.169 | 0.052  | -0.127 | -0.331 | 0.033  | 0.183  | 0.065  |    | 0.136  |
| A018480_01 | -0.056 | 0.01   | 0.137  | -0.071 | 0.121  | 0.101  | 0.089  |    | 0.19   |
| A018484_01 | 0.102  | 0.083  | -0.046 | -0.055 | -0.045 | -0.112 | 0.185  |    | 0.108  |
| A018486_01 | 0.04   | -0.204 | -0.201 | -0.337 | -0.031 | -0.208 | 0.173  |    | -0.101 |
| A018488_01 | -0.216 | -0.162 | 0.21   | 0.271  | -0.426 | -0.763 | -0.025 |    | -0.222 |
| A018497_01 | 0.427  | 0.28   | 0.249  | 0.036  | 0.002  | -0.043 | -0.077 |    | -0.152 |
| A018499_01 | 0.378  | NA     | -0.073 | -0.226 | -0.055 | -0.317 | NA     | NA |        |
| A018500_01 | -0.083 | -0.392 | -0.056 | -0.093 | -0.033 | -0.075 | -0.158 |    | -0.407 |
| A018501_01 | 0.215  | 0.327  | -0.029 | -0.009 | 0.245  | 0.134  | -0.056 |    | -0.053 |
| A018502_01 | -0.194 | 0.002  | 0.146  | -0.024 | 0.142  | 0.295  | -0.201 |    | -0.07  |
| A018505_01 | 0.253  | 0.287  | 0.11   | -0.117 | 0.191  | -0.057 | 0.091  |    | 0.125  |
| A018506_01 | -0.253 | -0.228 | -0.18  | 0.007  | -0.685 | -0.828 | -0.296 |    | -0.377 |
| A018510_01 | 0.046  | 0.126  | -0.11  | -0.205 | 0.445  | 0.498  | 0.207  |    | 0.12   |
| A018516_01 | 0.113  | 0.213  | -0.109 | -0.099 | 0.146  | 0.345  | -0.205 |    | 0.143  |
| A018517_01 | 0.051  | -0.101 | -0.234 | -0.221 | -0.082 | -0.013 | -0.06  |    | -0.17  |
| A018518_01 | NA     | 0.333  | -0.09  | -0.182 | 0.251  | 0.253  | 0.217  |    | 0.334  |
| A018519_01 | 0.239  | 0.173  | -0.238 | -0.192 | 0.216  | 0.222  | 0.152  |    | 0.132  |
| A018520_01 | -0.16  | NA     | 0.062  | 0.144  | NA     | -0.742 | 0.046  |    | -0.048 |
| A018522_01 | 0.21   | 0.02   | 0.076  | 0.046  | -0.149 | -0.215 | 0.15   |    | 0.012  |
| A018523_01 | 0.118  | 0.144  | 0.005  | NA     | -0.112 | 0.014  | NA     | NA |        |
| A018528_01 | 0.233  | NA     | 0.246  | -0.166 | 0.234  | 0.317  | NA     |    | 0.058  |
| A018530_01 | -0.055 | -0.157 | 0.045  | NA     | -0.285 | -0.452 | NA     | NA |        |
| A018531_01 | 0.283  | NA     | 0.463  | 0.184  | NA     | NA     | -0.084 |    | -0.18  |
| A018533_01 | 0.368  | 0.059  | -0.131 | 0.027  | 0.04   | 0.142  | 0.142  |    | 0.055  |
| A018536_01 | 0.104  | 0.128  | -0.172 | -0.016 | -0.015 | 0.008  | NA     | NA |        |
| A018545_01 | -0.204 | NA     | 0.304  | 0.051  | 0.361  | 0.411  | NA     |    | -0.3   |
| A018554_01 | 0.165  | -0.209 | 0.111  | -0.013 | 0.184  | 0.226  | -0.028 | NA |        |
| A018560_01 | -0.049 | -0.008 | -0.106 | -0.22  | 0.332  | 0.359  | 0.241  |    | 0.266  |
| A018561_01 | 0.435  | 0.29   | 0.135  | 0.107  | -0.135 | -0.397 | 0.187  |    | -0.148 |
| A018563_01 | 0.101  | NA     | -0.122 | -0.088 | 0.089  | -0.025 | 0.271  |    | 0.039  |
| A018564_01 | 0.357  | 0.099  | -0.543 | -0.477 | 0.044  | 0.084  | 0.406  |    | 0.359  |
| A018566_01 | NA     | NA     | -0.415 | -0.218 | NA     | -0.192 | 0.247  |    | 0.092  |
| A018568_01 | -0.191 | NA     | 0.368  | 0.112  | NA     | NA     | NA     |    | -0.194 |
| A018575_01 | -0.014 | -0.032 | 0.099  | 0.011  | -0.012 | -0.084 | -0.011 |    | 0.064  |
| A018581_01 | 0.22   | 0.045  | 0.058  | -0.187 | 0.34   | 0.119  | 0.155  |    | 0.063  |
| A018583_01 | 0.056  | -0.09  | 0.148  | 0.252  | 0.362  | 0.455  | NA     | NA |        |
| A018587_01 | 0.127  | -0.085 | NA     | NA     | 0.463  | 0.292  | NA     |    | -0.175 |
| A018589_01 | -0.096 | NA     | -0.096 | NA     | 0.127  | 0.112  | NA     | NA |        |
| A018590_01 | 0.281  | 0.314  | 0.086  | 0.06   | NA     | -0.156 | -0.054 |    | -0.214 |
| A018591_01 | 0.178  | 0.081  | 0.005  | -0.199 | 0.158  | 0.16   | -0.099 |    | -0.101 |



|            |           |          |          |           |        |           |          |        |
|------------|-----------|----------|----------|-----------|--------|-----------|----------|--------|
| A018598_01 | 0.306 NA  | NA       |          | 0.136 NA  | NA     | NA        |          | -0.115 |
| A018600_01 | 0.163     | 0.261    | 0.379    | 0.522     | -0.303 | -0.191    | 0.195    | 0.557  |
| A018604_01 | -0.131    | -0.048   | 0.057    | 0.095     | -0.664 | -0.702    | 0.074    | 0.033  |
| A018607_01 | 0.72      | 0.829    | -0.398   | -0.337    | 0.865  | 0.781     | 0.479    | 0.436  |
| A018613_01 | -0.695    | -0.952   | 0.204    | 0.179     | 0.762  | 0.975 NA  | NA       |        |
| A018617_01 | -0.04     | 0.047    | 0.124    | 0.07      | 0.226  | 0.38      | 0.159    | 0.262  |
| A018618_01 | -0.162    | 0.154    | -0.186   | -0.243    | 0.244  | 0.586     | -0.12    | 0.216  |
| A018620_01 | -0.125    | -0.416   | -0.233   | -0.306    | -0.384 | -0.499    | 0.159    | -0.02  |
| A018621_01 | 0.246     | -0.025   | -0.021   | 0.072     | -0.187 | -0.264    | 0.174    | -0.323 |
| A018625_01 | 0.223     | 0.06     | -0.223   | -0.116    | 0.43   | 0.482     | 0.245    | 0.066  |
| A018628_01 | 0.118     | 0.088    | 0.014    | 0.039     | 0.192  | 0.285     | 0.104    | 0.009  |
| A018630_01 | 0.13      | 0.134    | 0.571    | 0.458     | 0.33   | 0.462     | -0.02    | -0.217 |
| A018635_01 | -0.304    | -0.481   | 0.365    | 0.368     | -0.737 | -0.876    | -0.023   | -0.286 |
| A018637_01 | 0.191     | 0.211    | 0.076    | 0.133     | 0.184  | 0.157     | 0.057    | -0.071 |
| A018638_01 | -0.888    | -0.77    | -0.266   | -0.289    | -1.218 | -1.233    | -0.292   | -0.374 |
| A018647_01 | -0.287    | -0.136   | 0.131    | 0.205     | -0.117 | -0.026    | -0.246   | -0.153 |
| A018649_01 | 0.127     | 0.19     | 0.032    | -0.04     | 0.063  | -0.032    | -0.097   | -0.057 |
| A018652_01 | 0.157 NA  |          | -0.024   | -0.091 NA | NA     |           | 0.158    | -0.086 |
| A018655_01 | 0.456     | 0.482    | -0.291   | -0.146    | 0.63   | 0.679     | 0.378    | 0.327  |
| A018662_01 | -0.598    | -0.713   | -0.231   | -0.177    | -1.159 | -1.309    | -0.01    | -0.078 |
| A018663_01 | -0.071    | -0.272   | -0.098   | -0.164    | -0.082 | -0.104    | 0.111    | 0.058  |
| A018665_01 | -0.054    | 0.305    | 0.456    | 0.446     | 0.536  | 0.765     | -0.273   | 0.072  |
| A018666_01 | 0.311 NA  |          | 0.172    | 0.054 NA  |        | -0.181    | 0.292    | -0.1   |
| A018667_01 | 0.1       | -0.044   | 0.149    | -0.079    | 0.121  | -0.093    | 0.331    | 0.012  |
| A018672_01 | -0.108    | -0.21    | 0.553    | 0.588     | 0.908  | 1.223     | 0.51     | 0.371  |
| A018673_01 | 0.498     | 0.487    | 0.314    | 0.736     | -0.63  | -0.813    | -0.626   | -0.817 |
| A018675_01 | 0.056 NA  |          | 0.341    | -0.008 NA |        | -0.517    | 0.058    | -0.065 |
| A018678_01 | -0.227    | -0.136   | 0.402    | 0.352     | -0.129 | -0.048    | -0.032   | -0.2   |
| A018682_01 | 0.1       | 0.17     | -0.304   | -0.304    | 0.008  | 0.217     | -0.076   | 0.163  |
| A018686_01 | -0.253 NA |          | 0.11     | 0.041     | -0.155 | -0.291    | -0.015   | -0.123 |
| A018687_01 | 1.208     | 0.874 NA | NA       |           | -0.979 | -1.408    | 1.018    | 0.729  |
| A018688_01 | 0.366     | 0.198    | -0.036   | -0.114    | 0.141  | 0.422     | -0.125   | 0.145  |
| A018694_01 | -0.322 NA |          | 0.13     | 0.073 NA  |        | -0.771 NA |          | -0.239 |
| A018696_01 | 0.127     | 0.138    | 0.12     | 0.107     | 0.094  | 0.169     | 0.01     | -0.108 |
| A018699_01 | 0.388     | 0.464    | 0.263    | 0.163     | 0.558  | 0.353 NA  |          | -0.099 |
| A018707_01 | 0.021     | 0.093    | 0.235    | -0.051    | 0.214  | 0.064     | 0.115    | 0.108  |
| A018708_01 | 0.122     | 0.336    | -0.138   | -0.093    | 0.06   | 0.326     | -0.113   | 0.091  |
| A018709_01 | -0.951    | -0.62    | -1.142   | -0.913    | 0.326  | 0.752     | -0.23    | -0.255 |
| A018710_01 | 0.078     | -0.157   | -0.32    | -0.105    | -0.31  | -0.126    | 0.144    | -0.011 |
| A018711_01 | -0.031    | -0.141   | 1.004    | 0.652     | -0.729 | -0.882    | -0.619   | -0.739 |
| A018712_01 | 0.307     | 0.381    | 0.382    | 0.154     | -0.178 | -0.323 NA |          | -0.36  |
| A018714_01 | -0.296    | -0.219   | 0.266    | 0.331     | 0.272  | 0.639     | -0.541   | -0.605 |
| A018715_01 | -0.345    | -0.271   | -0.304   | -0.298    | 0.113  | 0.487     | 0.084    | 0.086  |
| A018717_01 | 0.072     | 0.024    | 0        | -0.049    | 0.194  | 0.389     | 0.052    | 0.033  |
| A018720_01 | 0.285     | 0.188    | -0.073   | -0.157    | 0.261  | 0.131     | 0.114 NA |        |
| A018723_01 | 0.343     | 0.119    | -0.007   | -0.202    | 0.282  | 0.254     | 0.102    | -0.12  |
| A018737_01 | 0.323     | 0.118    | 0.204    | 0.101     | -0.287 | -0.47     | 0.088    | -0.225 |
| A018742_01 | 0.091     | -0.016   | 0.002    | 0.051     | 0.147  | 0.257     | 0.307    | 0.178  |
| A018746_01 | 0.058 NA  | NA       | NA       | NA        |        | 0.008 NA  | NA       |        |
| A018753_01 | 0.074 NA  |          | -0.323   | -0.423    | 0.294  | 0.455     | 0.274    | 0.432  |
| A018758_01 | 0.049     | 0.121    | 0.025    | 0.181     | -0.032 | -0.038    | 0.001    | -0.074 |
| A018771_01 | -0.171 NA |          | -0.3     | -0.076    | 0.042  | 0.037 NA  |          | -0.072 |
| A018772_01 | 0.26      | 0.195    | -0.157   | -0.1      | 0.298  | 0.245     | 0.123    | 0.06   |
| A018774_01 | -0.119    | 0.041    | 0.12     | 0.033     | 0.192  | 0.398     | -0.551   | -0.555 |
| A018778_01 | 0.03      | -0.072   | -0.227   | -0.059    | -0.169 | -0.025    | 0.199    | 0.07   |
| A018779_01 | 0.347     | -0.019   | -0.209   | -0.196    | -0.054 | 0 NA      |          | -0.198 |
| A018781_01 | 0.866     | 0.851    | 0.516    | 0.318     | -0.326 | -0.448    | -0.356   | -0.061 |
| A018786_01 | 0.21      | 0.129    | -0.099   | -0.301    | 0.306  | 0.155     | -0.204   | -0.191 |
| A018793_01 | 0.348 NA  |          | -0.041   | -0.215    | 0.13   | 0.077 NA  |          | -0.14  |
| A018795_01 | -0.476 NA |          | 0.348    | 0.182     | 0.309  | 0.206     | 0.331    | 0.215  |
| A018803_01 | 0.002     | -0.181   | -0.673   | -0.902    | -0.143 | -0.111    | -0.1     | -0.104 |
| A018807_01 | -0.084 NA |          | -0.138   | -0.306 NA | NA     |           | -0.025   | -0.079 |
| A018809_01 | -0.083    | -0.062   | -0.143   | -0.063    | -0.157 | -0.179    | -0.069   | 0.035  |
| A018810_01 | 0.459     | 0.436    | -0.125   | -0.177 NA |        | -0.005 NA | NA       |        |
| A018812_01 | 0.165 NA  |          | -0.277   | -0.367    | 0.099  | 0.041 NA  |          | 0.027  |
| A018814_01 | -1.02     | -1.221   | 0.191    | 0.14      | 0.236  | 0.584     | -0.049   | -0.214 |
| A018815_01 | 0.313     | 0.106    | -0.016   | 0.074     | -0.407 | -0.403    | 0.163    | -0.157 |
| A018816_01 | -0.129 NA |          | 0.011 NA |           | -0.205 | -0.276 NA | NA       |        |

|            |          |          |           |           |        |           |        |        |
|------------|----------|----------|-----------|-----------|--------|-----------|--------|--------|
| A018818_01 | 0.292    | 0.432    | -0.388    | -0.322    | 0.117  | 0.278     | -0.188 | 0.144  |
| A018819_01 | 0.205 NA |          | -0.313    | -0.324    | -0.124 | -0.357    | 0.306  | -0.091 |
| A018820_01 | 0.459    | 0.593    | 0.127     | -0.115    | -0.859 | -1.2      | 0.143  | -0.079 |
| A018823_01 | -0.439   | -0.415   | -0.582    | -0.673    | 0.503  | 0.755     | 0.479  | 0.197  |
| A018826_01 | -0.061   | -0.366   | -0.375    | -0.138    | 0.209  | 0.461     | -0.21  | -0.422 |
| A018827_01 | -0.015   | -0.11    | -0.298    | -0.276    | 0.232  | 0.31      | 0.131  | 0.032  |
| A018828_01 | 0.076    | -0.218   | -0.106    | -0.018    | -0.095 | -0.239    | 0.232  | -0.144 |
| A018832_01 | 0.251    | -0.024   | -0.114    | 0.048     | -0.282 | -0.264 NA |        | -0.056 |
| A018833_01 | 0.178    | 0.056    | 0.296     | 0.256     | -0.169 | -0.275    | -0.325 | -0.47  |
| A018834_01 | 0.233    | 0.172    | 0.198     | -0.091    | 0.516  | 0.393     | 0.407  | 0.203  |
| A018840_01 | -0.416   | -0.429   | -0.04     | 0.037     | -0.574 | -0.776    | -0.079 | -0.15  |
| A018841_01 | -0.055   | 0.153    | 0.078     | 0.034     | 0.431  | 0.678     | 0.138  | 0.289  |
| A018842_01 | -0.041   | -0.168   | 0.061     | 0.068     | 0.196  | 0.059     | 0.156  | 0.018  |
| A018844_01 | -0.14    | -0.183   | -0.147    | -0.072    | -0.243 | -0.307    | -0.132 | -0.234 |
| A018848_01 | 0.114    | 0.025    | -0.093    | -0.039    | -0.203 | -0.247    | -0.116 | -0.143 |
| A018849_01 | 0.034 NA |          | -0.072    | -0.087 NA |        | -1.79 NA  |        | -1.141 |
| A018851_01 | 0.228    | 0.223    | -0.023    | 0.004     | 0.048  | 0.023     | 0.282  | 0.273  |
| A018852_01 | 0.149    | -0.025   | -0.12     | -0.219    | 0.515  | 0.375     | 0.308  | 0.183  |
| A018862_01 | 0.036    | 0.057    | 0.109     | -0.033    | -0.003 | -0.111    | -0.102 | -0.028 |
| A018863_01 | -0.073   | -0.141   | -0.083    | 0.002     | -0.08  | -0.2      | 0.114  | -0.161 |
| A018864_01 | 0.233    | -0.175   | -0.107    | -0.216    | -0.151 | -0.29 NA  |        | -0.225 |
| A018867_01 | -0.135   | -0.14    | 0.041     | -0.015    | -0.035 | 0.129     | 0.01   | 0.085  |
| A018869_01 | -0.576   | -0.244   | -0.128    | -0.196    | -1.79  | -1.739    | -0.643 | -0.716 |
| A018871_01 | 0.038    | 0.154    | 0.47      | 0.141     | 0.069  | 0.023 NA  |        | -0.334 |
| A018875_01 | 0.22     | 0.187    | 0.266     | 0.27      | -0.296 | -0.075    | -0.401 | -0.375 |
| A018889_01 | 0.098    | -0.007   | 0.01      | -0.09     | -0.157 | -0.376 NA |        | -0.169 |
| A018891_01 | -3.333   | -2.859   | -2.273    | -2.077 NA | NA     | NA        | NA     |        |
| A018894_01 | -0.042   | -0.007   | -0.091    | -0.014    | 0.114  | 0.19      | 0.065  | 0.069  |
| A018896_01 | 0.231    | 0.317    | 0.264     | 0.106     | 0.135  | 0.16      | -0.023 | 0.006  |
| A018897_01 | 0.153    | -0.027   | -0.026    | 0.064     | 0.369  | 0.48      | 0.203  | 0.021  |
| A018899_01 | -0.05    | -0.086   | -0.3      | -0.222    | 0.108  | 0.247 NA  | NA     |        |
| A018904_01 | -0.037   | -0.064   | -0.238    | -0.253    | -0.183 | -0.164    | 0.264  | 0.249  |
| A018906_01 | -0.076   | -0.144   | 0.133     | -0.007    | -0.208 | -0.383    | -0.056 | -0.203 |
| A018908_01 | 0.395    | 0.135    | 0.173     | 0.072     | 0.013  | -0.13 NA  |        | -0.217 |
| A018909_01 | -0.164   | -0.376   | -0.394    | -0.358    | -1.023 | -1.089    | -0.407 | -0.493 |
| A018911_01 | 0.059    | 0.44     | -0.223    | -0.226    | 0.674  | 1.041     | 0.033  | 0.128  |
| A018912_01 | -0.142   | -0.066   | -0.041    | -0.111    | -0.045 | -0.19     | 0.112  | 0.003  |
| A018914_01 | -0.261   | -0.279   | 0.139     | 0.127     | 0.337  | 0.375     | 0.105  | -0.002 |
| A018915_01 | -0.495   | -0.426   | -0.015    | 0.091     | -0.802 | -0.755    | -0.669 | -0.618 |
| A018919_01 | 0.257    | 0.158    | 0.309     | 0.199     | 0.017  | -0.104    | -0.175 | -0.367 |
| A018920_01 | 0.236    | 0.048    | -0.036    | -0.119    | 0.011  | -0.078    | 0.122  | -0.109 |
| A018921_01 | 0.396    | 0.056    | -0.069    | -0.021    | 0.056  | -0.003 NA | NA     |        |
| A018922_01 | -0.156   | -0.201   | 0.23      | 0.241     | -0.181 | -0.077    | -0.233 | -0.29  |
| A018924_01 | 0.375    | 0.039    | -0.29     | -0.309    | 0.307  | 0.078     | 0.337  | -0.09  |
| A018925_01 | 0.124    | -0.043   | -0.423    | -0.465    | 0.022  | 0.071     | 0.025  | 0.049  |
| A018931_01 | -0.261   | -0.351   | -0.001    | -0.113    | -0.224 | -0.295    | 0.165  | 0.101  |
| A018932_01 | 0.033    | -0.114   | 0.056     | -0.025    | 0.386  | 0.409     | -0.233 | -0.285 |
| A018933_01 | -0.404   | -0.406   | -0.207    | -0.136    | -0.034 | 0.207     | -0.275 | -0.388 |
| A018934_01 | 0.417    | 0.464    | 0.423     | 0.697     | -0.456 | -0.641    | -0.526 | -0.728 |
| A018935_01 | -0.141   | 0.05     | 0.172 NA  |           | 0.766  | 1.158 NA  |        | -0.31  |
| A018936_01 | 0.023    | -0.049   | -0.086    | -0.205    | 0.161  | 0.052     | 0.173  | 0.079  |
| A018937_01 | NA       | 0.014    | -0.258    | -0.389    | 0.396  | 0.632     | 0.004  | 0.026  |
| A018942_01 | 0.278    | 0.169    | -0.168    | 0.142     | 0.429  | 0.511     | 0.172  | -0.028 |
| A018949_01 | 0.061    | -0.1     | -0.458    | -0.64     | 0.544  | 0.501     | 0.724  | 0.569  |
| A018950_01 | -0.084   | -0.116   | 0.044     | -0.085    | -0.212 | -0.111    | -0.103 | 0.064  |
| A018952_01 | 0.173    | 0.398    | 0.099     | 0.007     | 0.089  | 0.158     | 0.079  | 0.223  |
| A018955_01 | -0.346   | -0.374   | -0.168    | -0.227    | -0.263 | -0.375 NA |        | -0.074 |
| A018959_01 | 0.352    | -0.041   | -0.12     | -0.126    | -0.118 | -0.184    | 0.171  | -0.227 |
| A018961_01 | 0.04 NA  |          | 0.388 NA  |           | -0.448 | -0.364 NA | NA     |        |
| A018963_01 | 0.228 NA |          | 0.445     | 0.203 NA  | NA     |           | -0.034 | -0.297 |
| A018964_01 | 0.307    | 0.198    | -0.164    | -0.214    | 0.033  | 0.013     | 0.117  | -0.022 |
| A018970_01 | 0.025    | -0.201   | -0.448 NA | NA        |        | 0.185 NA  | NA     |        |
| A018973_01 | 0.103    | -0.105   | 0.065     | -0.023    | 0.281  | 0.362     | 0.143  | 0.037  |
| A018974_01 | -0.001   | -0.133   | -0.298    | -0.367    | -0.118 | -0.247    | -0.022 | -0.208 |
| A018975_01 | -0.056   | -0.294   | -0.267    | -0.364    | 0.025  | 0.178 NA  |        | -0.536 |
| A018979_01 | 0.266 NA |          | -0.112    | -0.25     | 0.052  | -0.167    | -0.051 | -0.195 |
| A018982_01 | 0.082    | -0.06    | -0.198    | -0.149    | -0.078 | 0.031     | 0.105  | -0.012 |
| A018983_01 | 0.304    | 0.047 NA |           | -0.422    | -0.059 | -0.239 NA |        | -0.336 |

|            |    |        |        |        |        |        |        |        |        |
|------------|----|--------|--------|--------|--------|--------|--------|--------|--------|
| A018986_01 |    | 0.505  | 0.46   | 0.047  | -0.001 | 0.582  | 0.58   | NA     | -0.304 |
| A018988_01 |    | 0.066  | 0.039  | -0.242 | -0.333 | 0.01   | 0.075  |        | 0.133  |
| A018991_01 |    | 0.325  | NA     | -0.131 | 0.026  | NA     |        | -0.076 | -0.027 |
| A018992_01 |    | -0.135 | -0.35  | -0.23  | -0.281 | -0.194 | -0.142 | 0.066  | -0.02  |
| A018998_01 |    | 0.269  | NA     | 0.008  | -0.07  | 0.089  | 0.034  | 0.252  | -0.021 |
| A019000_01 |    | 0.7    | 0.329  | 0.152  | 0.195  | 0.338  | 0.402  | -0.168 | -0.299 |
| A019002_01 |    | 0.09   | 0.223  | -0.662 | -0.87  | -0.817 | -0.901 | NA     | NA     |
| A019012_01 |    | 0.018  | -0.069 | -0.097 | -0.146 | 0.134  | 0.071  | 0.045  | -0.139 |
| A019014_01 |    | 0.099  | 0.215  | -0.193 | -0.092 | 0.111  | 0.194  | -0.087 | -0.22  |
| A019017_01 | NA |        | 0.044  | 0.42   | 0.268  | NA     | -0.37  | NA     | NA     |
| A019021_01 |    | -0.182 | -0.087 | -0.127 | -0.246 | 0.269  | 0.102  | 0.133  | 0.088  |
| A019022_01 |    | 0.144  | -0.075 | -0.209 | -0.091 | 0.01   | -0.083 | 0.581  | 0.588  |
| A019026_01 |    | 0.354  | NA     | 0.461  | 0.111  | -0.004 | -0.477 | NA     | -0.396 |
| A019027_01 |    | -0.084 | -0.465 | 0.146  | -0.006 | -0.661 | -0.937 | -0.135 | -0.397 |
| A019032_01 |    | -1.087 | -1.077 | -0.211 | -0.329 | -0.359 | -0.369 | 0.046  | 0.151  |
| A019033_01 |    | 0.515  | 0.087  | 0.502  | 0.134  | 0.139  | -0.143 | NA     | NA     |
| A019040_01 |    | -0.155 | -0.159 | -0.179 | 0.084  | -0.326 | -0.23  | 0.024  | -0.188 |
| A019041_01 |    | -0.544 | -0.566 | 0.022  | -0.144 | -0.477 | -0.181 | -0.118 | 0.352  |
| A019043_01 | NA |        | NA     | -0.013 | -0.225 | NA     | 0.248  | NA     | 0.059  |
| A019046_01 |    | 0.276  | 0.39   | -0.125 | -0.416 | 0.581  | 0.815  | 0.382  | 0.641  |
| A019047_01 |    | 0.028  | NA     | 0.387  | 0.141  | NA     | -0.48  | NA     | -0.36  |
| A019049_01 |    | 0.02   | -0.034 | -0.261 | -0.333 | 0.21   | 0.136  | 0.412  | 0.09   |
| A019050_01 |    | -0.119 | 0.018  | -0.078 | -0.032 | 0.3    | 0.617  | 0.333  | 0.361  |
| A019053_01 |    | 0.133  | 0.069  | -0.027 | 0.108  | -0.783 | -0.988 | -0.151 | -0.16  |
| A019057_01 |    | -0.04  | -0.042 | -0.07  | -0.139 | 0.135  | 0.154  | 0.234  | 0.292  |
| A019059_01 |    | 0.322  | -0.132 | -0.317 | -0.289 | 0.237  | 0.262  | 0.263  | -0.058 |
| A019060_01 |    | -0.064 | 0.068  | 0.174  | 0.246  | 0.099  | 0.269  | -0.078 | -0.033 |
| A019064_01 |    | -0.29  | -0.082 | -0.045 | 0.041  | -0.146 | -0.055 | 0.15   | 0.073  |
| A019068_01 |    | 0.349  | NA     | 0.186  | 0.165  | 0.108  | -0.147 | NA     | -0.126 |
| A019074_01 |    | -0.505 | NA     | NA     | -0.921 | NA     | NA     | NA     | -0.329 |
| A019081_01 |    | 0.25   | 0.178  | -0.029 | -0.033 | 0.063  | -0.224 | 0.105  | -0.006 |
| A019086_01 |    | 0.027  | 0.206  | 0.162  | -0.002 | 0.114  | 0.093  | 0.05   | 0.076  |
| A019089_01 | NA |        | -0.015 | 0.284  | 0.493  | NA     | -0.338 | NA     | NA     |
| A019092_01 |    | 0.101  | 0.02   | 0.23   | 0.17   | -0.415 | -0.553 | 0.006  | -0.081 |
| A019094_01 |    | 0.133  | 0.301  | 0.127  | 0.003  | 0.301  | 0.251  | NA     | 0.095  |
| A019098_01 |    | 0.203  | -0.244 | -0.105 | -0.205 | 0.145  | -0.277 | 0.315  | -0.122 |
| A019106_01 |    | 0.133  | -0.1   | -0.081 | -0.222 | -0.298 | -0.297 | 0.013  | -0.144 |
| A019110_01 |    | 0.074  | 0.265  | -0.123 | -0.321 | 0.18   | 0.255  | 0.066  | 0.283  |
| A019116_01 |    | 0.058  | -0.03  | -0.16  | 0.053  | -0.309 | -0.3   | 0.211  | -0.005 |
| A019127_01 |    | -0.929 | -1.105 | -0.291 | -0.255 | -0.914 | -0.969 | NA     | -0.416 |
| A019139_01 |    | -0.046 | 0.28   | -0.292 | -0.307 | 0.301  | 0.162  | 0.195  | 0.008  |
| A019143_01 |    | -0.265 | -0.483 | 0.112  | 0.055  | -0.391 | -0.701 | 0.243  | -0.181 |
| A019145_01 |    | -1.327 | -1.15  | -0.088 | -0.308 | -1.021 | -1.128 | -0.661 | -0.743 |
| A019146_01 |    | 0.071  | -0.281 | NA     | -0.601 | 0.115  | 0.088  | NA     | -0.257 |
| A019151_01 |    | 0.251  | 0.143  | 0.17   | 0.123  | -0.233 | -0.287 | -0.269 | -0.379 |
| A019155_01 |    | 0.16   | -0.183 | 0.194  | -0.007 | 0.197  | 0.124  | 0.111  | -0.051 |
| A019171_01 |    | 0.16   | 0.371  | -0.057 | 0.127  | -0.016 | -0.105 | 0.042  | -0.039 |
| A019174_01 | NA |        | -0.094 | 0.005  | -0.219 | 0.122  | 0.213  | -0.084 | -0.084 |
| A019181_01 |    | 0.291  | -0.018 | 0.068  | -0.191 | 0.183  | 0.038  | 0.236  | -0.034 |
| A019186_01 | NA |        | NA     | -0.097 | -0.054 | NA     | NA     | -1.374 | -1.494 |
| A019187_01 |    | -0.158 | -0.046 | 0.122  | 0.186  | -0.651 | -0.798 | -0.195 | -0.22  |
| A019188_01 |    | -0.2   | -0.316 | 0.478  | 0.324  | 0.738  | 0.677  | 0.323  | 0.029  |
| A019192_01 |    | 0.26   | 0.049  | -0.035 | 0.267  | -0.337 | -0.421 | -0.13  | -0.335 |
| A019196_01 |    | 0.004  | NA     | 0.263  | -0.137 | 0.035  | -0.018 | NA     | NA     |
| A019200_01 |    | 0.116  | 0.159  | -0.568 | -0.214 | -0.262 | -0.139 | 0.24   | 0.291  |
| A019206_01 |    | 0.323  | 0.044  | 0.082  | 0.007  | 0.073  | -0.012 | -0.077 | -0.193 |
| A019211_01 |    | -0.001 | 0.057  | -0.218 | -0.066 | 0.149  | 0.097  | 0.216  | 0.116  |
| A019213_01 |    | -0.549 | 0.304  | -0.003 | -0.208 | 0.844  | 0.552  | 0.134  | 0.566  |
| A019216_01 |    | 0.02   | -0.087 | -0.17  | -0.456 | 0.203  | 0.214  | NA     | -0.066 |
| A019229_01 |    | 0.296  | 0.295  | -0.101 | 0.118  | 0.018  | -0.018 | 0.193  | 0.081  |
| A019231_01 | NA |        | 0.025  | 0.168  | -0.219 | NA     | -0.441 | NA     | NA     |
| A019244_01 | NA |        | 0.001  | -0.201 | -0.152 | -0.03  | 0.027  | -0.015 | -0.042 |
| A019247_01 |    | 0.342  | 0.532  | 0.459  | 0.545  | 0.206  | 0.409  | 0.015  | 0.009  |
| A019249_01 |    | 0.174  | 0.278  | 0.097  | 0.053  | 0.299  | 0.295  | 0.04   | 0.043  |
| A019252_01 |    | -0.115 | 0.22   | 0.153  | -0.035 | 0.395  | 0.921  | 0.1    | 0.43   |
| A019253_01 |    | -0.11  | -0.058 | -0.196 | -0.088 | 0.028  | 0.043  | 0.098  | 0.048  |
| A019255_01 | NA |        | 0.405  | -0.052 | 0.046  | NA     | 0.068  | 0.039  | -0.117 |
| A019261_01 |    | -0.071 | -0.239 | 0.039  | 0.041  | -0.239 | -0.398 | -0.007 | -0.229 |

|            |    |        |        |        |        |        |        |        |        |
|------------|----|--------|--------|--------|--------|--------|--------|--------|--------|
| A019274_01 | NA |        | 0.411  | -0.694 | -0.598 | -0.267 | -0.084 | -0.242 | -0.341 |
| A019281_01 |    | 0.094  | -0.122 | -0.108 | -0.156 | -0.379 | -0.681 | -0.018 | -0.272 |
| A019289_01 |    | -0.154 | -0.042 | -0.168 | -0.076 | -0.18  | -0.191 | 0.283  | 0.23   |
| A019291_01 |    | 0.115  | -0.028 | 0.31   | 0.356  | 0.057  | 0.054  | 0.076  | 0.044  |
| A019293_01 |    | 0.092  | NA     | 0.448  | 0.132  | NA     | NA     | 0.027  | -0.063 |
| A019301_01 |    | 0.316  | 0.262  | 0.2    | -0.018 | -0.027 | -0.092 | 0.022  | 0.098  |
| A019303_01 |    | -0.036 | NA     | -0.003 | -0.194 | 0.146  | -0.213 | 0.113  | -0.024 |
| A019305_01 |    | -0.452 | -0.273 | -0.631 | -0.772 | 0.151  | 0.032  | NA     | -1.787 |
| A019308_01 |    | 0.064  | 0.173  | 0.44   | 0.395  | 0.077  | 0.036  | -0.544 | -0.537 |
| A019312_01 |    | -0.07  | 0.194  | 0.132  | 0.148  | 0.271  | 0.357  | -0.222 | -0.046 |
| A019318_01 |    | -0.01  | 0.14   | 0.132  | 0.4    | -0.099 | 0.118  | 0.123  | 0.064  |
| A019324_01 | NA |        | -0.743 | -0.423 | -0.421 | -1.013 | -1.137 | -0.115 | -0.279 |
| A019325_01 |    | -0.968 | -0.683 | 0.177  | 0.119  | -0.202 | -0.101 | -0.212 | -0.268 |
| A019326_01 |    | -0.29  | -0.167 | -0.157 | -0.251 | -0.054 | -0.041 | 0.305  | 0.203  |
| A019328_01 |    | -0.334 | -0.241 | 0.034  | -0.191 | 0.413  | 0.719  | 0.026  | 0.136  |
| A019330_01 |    | -0.197 | -0.249 | -0.029 | 0.147  | -0.196 | -0.322 | -0.006 | -0.025 |
| A019331_01 |    | 0.089  | 0.086  | -0.356 | -0.567 | 0.611  | 0.86   | 0.063  | 0.086  |
| A019336_01 |    | 0.4    | 0.279  | -0.095 | -0.161 | 0.009  | -0.059 | 0.115  | -0.003 |
| A019338_01 |    | 0.197  | 0.106  | -0.276 | -0.326 | 0.156  | -0.049 | 0.288  | 0.165  |
| A019340_01 |    | 0.017  | -0.031 | 0.091  | -0.06  | 0.072  | 0.147  | -0.056 | 0.147  |
| A019343_01 |    | -0.236 | -0.162 | 0.348  | 0.289  | 0.181  | 0.337  | 0.08   | -0.012 |
| A019353_01 |    | 0.107  | NA     | 0.109  | NA     | NA     | -0.283 | NA     | 0.014  |
| A019356_01 |    | 0.205  | NA     | -0.724 | -0.878 | NA     | -0.348 | NA     | NA     |
| A019358_01 |    | 0.168  | 0.11   | 0.681  | 0.64   | 0.288  | 0.212  | -0.235 | -0.42  |
| A019361_01 |    | 0.374  | 0.342  | 0.001  | 0.047  | 0.08   | 0.051  | 0.031  | -0.084 |
| A019367_01 |    | 0.136  | -0.011 | 0.04   | -0.077 | 0.028  | -0.067 | 0.051  | -0.143 |
| A019372_01 |    | -0.178 | 0.101  | -0.003 | -0.065 | 0.1    | 0.194  | 0.204  | 0.131  |
| A019383_01 |    | 0.024  | 0.05   | NA     | 0.186  | 0.485  | 0.59   | 0.209  | 0.181  |
| A019387_01 |    | 0.21   | 0.224  | 0.044  | NA     | 0.008  | -0.106 | NA     | NA     |
| A019395_01 |    | 0.281  | 0.048  | -0.061 | -0.223 | 0.196  | 0.189  | NA     | -0.005 |
| A019398_01 |    | -0.287 | -0.072 | 0.176  | 0.065  | -0.578 | -0.887 | -0.098 | -0.102 |
| A019400_01 |    | -0.149 | NA     | -0.278 | -0.22  | -0.292 | -0.333 | 0.069  | 0.144  |
| A019403_01 |    | 0.083  | 0.116  | 0.094  | 0.171  | -0.104 | -0.086 | NA     | NA     |
| A019407_01 |    | -0.035 | 0.023  | 0.082  | 0.246  | -0.008 | 0.128  | -0.121 | -0.106 |
| A019411_01 |    | 0.024  | NA     | -0.074 | -0.137 | 0.178  | 0.256  | NA     | 0.057  |
| A019414_01 |    | -0.021 | 0.023  | -0.103 | -0.101 | 0.014  | 0.169  | 0.124  | 0.152  |
| A019419_01 |    | 0.091  | -0.007 | 0.13   | 0.19   | 0.314  | 0.449  | -0.049 | 0.078  |
| A019423_01 |    | 0.303  | NA     | -0.209 | -0.014 | 0.169  | 0.209  | NA     | -0.255 |
| A019424_01 |    | 0.223  | NA     | -0.177 | -0.338 | 0.559  | 0.645  | 0.001  | -0.05  |
| A019425_01 |    | 0.974  | 1.067  | 0.871  | 0.524  | -0.37  | -0.654 | -0.889 | -0.577 |
| A019428_01 |    | 0.015  | 0.035  | 0.19   | -0.011 | -0.013 | 0.022  | -0.33  | -0.443 |
| A019429_01 |    | 0.133  | 0.233  | NA     | NA     | -0.402 | -0.169 | NA     | NA     |
| A019431_01 |    | 0.231  | 0.004  | 0.044  | 0.324  | -0.03  | -0.203 | 0.163  | -0.152 |
| A019436_01 |    | -0.538 | -0.083 | 0.092  | -0.001 | -0.316 | -0.253 | -0.246 | 0.057  |
| A019438_01 |    | -0.09  | -0.074 | 0.005  | 0.202  | -0.281 | -0.307 | -0.078 | -0.134 |
| A019442_01 |    | -0.11  | NA     | 0.217  | 0.083  | NA     | -0.24  | NA     | -0.003 |
| A019443_01 |    | -0.22  | -0.399 | -0.333 | -0.098 | -0.423 | -0.293 | 0.058  | -0.012 |
| A019444_01 |    | -0.035 | 0.239  | -0.305 | -0.506 | 0.119  | 0.58   | 0.069  | 0.401  |
| A019445_01 |    | 0.222  | 0.063  | -0.216 | -0.024 | 0.096  | -0.019 | 0.191  | 0.072  |
| A019447_01 |    | 0.277  | 0.456  | 0.389  | 0.232  | -0.455 | -0.637 | NA     | NA     |
| A019451_01 |    | -0.726 | -0.125 | 0.865  | 0.795  | 1.08   | 1.644  | 0.084  | 0.451  |
| A019456_01 |    | 0.094  | NA     | -0.287 | -0.315 | 0.519  | 0.514  | 0.223  | 0.299  |
| A019457_01 |    | 0.086  | 0.322  | -0.24  | -0.363 | 0.141  | 0.231  | 0.053  | 0.347  |
| A019458_01 |    | -0.248 | -0.251 | 0.012  | 0.055  | 0.263  | 0.346  | 0.085  | -0.021 |
| A019460_01 |    | 0.23   | 0.168  | 0.101  | -0.003 | 0.15   | 0.183  | 0.247  | 0.124  |
| A019461_01 |    | 0.061  | 0.121  | -0.467 | -0.316 | -0.133 | -0.115 | 0.219  | 0.288  |
| A019465_01 |    | 0.353  | NA     | -0.016 | 0.079  | NA     | -0.262 | 0.038  | -0.176 |
| A019466_01 |    | 0.495  | 0.443  | 0.382  | 0.2    | 0.06   | -0.183 | -0.071 | -0.098 |
| A019469_01 |    | -0.185 | -0.096 | -0.15  | 0.16   | -0.564 | -0.453 | -0.284 | -0.241 |
| A019472_01 |    | -0.262 | 0.233  | -1.079 | -0.989 | 0.513  | 0.95   | 0.116  | 0.402  |
| A019474_01 |    | 0.094  | 0.09   | -0.158 | -0.148 | 0.02   | 0.209  | -0.228 | -0.053 |
| A019475_01 |    | 0.278  | 0.055  | 0.121  | 0.244  | 0.599  | 0.71   | 0.189  | 0.041  |
| A019480_01 |    | -0.274 | -0.139 | -0.087 | -0.015 | -1.098 | -1.225 | -0.334 | NA     |
| A019485_01 |    | 0.315  | 0.295  | 0.07   | -0.064 | -0.736 | -0.945 | NA     | NA     |
| A019491_01 |    | -0.665 | -0.669 | 0.229  | 0.202  | 0.105  | 0.269  | -0.419 | -0.051 |
| A019493_01 |    | 0.384  | NA     | 0.105  | 0.238  | NA     | 0.019  | NA     | -0.261 |
| A019495_01 |    | 0.327  | NA     | 0.276  | 0.156  | NA     | -0.177 | -0.152 | -0.078 |
| A019496_01 |    | -0.837 | -0.726 | 0.042  | 0.032  | -0.655 | -0.658 | -0.665 | -0.536 |

|            |    |           |           |           |           |        |           |          |        |
|------------|----|-----------|-----------|-----------|-----------|--------|-----------|----------|--------|
| A019497_01 |    | -0.013    | 0.005     | -0.034    | -0.126    | -0.011 | 0.123 NA  | NA       |        |
| A019500_01 |    | 0.223 NA  |           | -0.027    | 0.104 NA  |        | -0.202    | 0.059    | -0.098 |
| A019502_01 |    | 0.319     | 0.373     | 0.408     | 0.385     | 0.065  | -0.074    | -0.173   | -0.276 |
| A019505_01 |    | 0.02      | -0.055    | -0.073    | -0.12     | -0.373 | -0.546    | 0.091    | -0.073 |
| A019510_01 |    | -0.421    | -0.098    | -0.094    | -0.15     | 0.341  | 0.437     | 0.134    | 0.233  |
| A019513_01 |    | -0.002    | -0.269    | -0.351    | -0.168    | -0.676 | -0.818    | -0.031   | -0.239 |
| A019514_01 |    | 0.014     | 0.039     | -0.193    | -0.283    | -0.083 | -0.072    | 0.116    | 0.196  |
| A019515_01 |    | -0.228    | -0.068    | -0.276    | -0.233    | 0.218  | 0.405     | -0.136   | -0.136 |
| A019517_01 |    | 0.016 NA  |           | 0.583     | 0.405     | -0.018 | -0.041    | -0.442   | -0.592 |
| A019520_01 |    | -0.003    | 0.167 NA  | NA        |           | 0.134  | 0.276 NA  | NA       |        |
| A019521_01 |    | 0.048     | 0.139     | -0.033    | -0.367    | -0.098 | -0.15     | 0.129    | 0.269  |
| A019524_01 |    | -0.258    | -0.337    | -0.548 NA |           | 0.091  | 0.18 NA   | NA       |        |
| A019525_01 |    | 0.403     | 0.138     | 0.166     | -0.012    | 0.101  | -0.19 NA  | NA       |        |
| A019526_01 |    | 0.024     | -0.067    | -0.052    | 0.2       | 0.804  | 1.098     | 0.132    | 0.047  |
| A019531_01 | NA | NA        |           | 0.613     | 0.481     | -0.218 | -0.312    | -0.499   | -0.705 |
| A019532_01 |    | -0.592    | -0.28     | -0.449    | -0.748    | 0.516  | 0.475 NA  |          | 0.011  |
| A019537_01 |    | -0.149 NA |           | -0.278    | -0.41     | 0.512  | 0.57 NA   |          | 0.164  |
| A019538_01 |    | -0.987    | -0.864    | 0.313     | 0.274     | 0.363  | 0.658     | -2.074   | -1.874 |
| A019543_01 |    | -0.404 NA |           | 1.24      | 1.504     | 0.472  | 0.567     | -0.771   | -0.742 |
| A019544_01 |    | 0.316     | 0.384     | -0.056    | -0.002    | -0.387 | -0.493    | -0.17    | -0.288 |
| A019556_01 |    | 0.266 NA  |           | 0.072     | 0.258     | 0.451  | 0.694     | -0.22    | -0.336 |
| A019557_01 |    | -0.246    | -0.168    | -0.195    | 0.107     | -0.224 | 0.099     | -0.025   | 0.078  |
| A019559_01 |    | -0.239    | -0.226    | -0.35     | -0.537    | -0.232 | -0.228 NA |          | 0.114  |
| A019560_01 |    | 0.181     | 0.031     | -0.437    | -0.39     | 0.457  | 0.336     | 0.213    | 0.169  |
| A019562_01 |    | -1.001    | -1.259 NA |           | -2.087    | -1.98  | -2.213 NA | NA       |        |
| A019566_01 |    | -0.188    | -0.1      | 0.067     | 0.129     | -1.232 | -1.409    | -0.421   | -0.457 |
| A019568_01 |    | -0.178    | -0.001    | -0.02     | -0.229    | 0.227  | 0.441 NA  | NA       |        |
| A019571_01 |    | -0.165    | -0.062    | 0.026     | -0.049    | 0.201  | 0.304     | -0.071   | 0.087  |
| A019572_01 |    | 0.187     | -0.014    | 0.146     | 0.253     | 0.388  | 0.517     | -0.211   | -0.166 |
| A019573_01 |    | 0.105     | 0.186 NA  | NA        |           | 0.364  | 0.321 NA  |          | 0.176  |
| A019575_01 |    | 0.493     | 0.536     | 0.264     | 0.127     | 0.429  | 0.182     | 0.198    | 0.043  |
| A019576_01 |    | 0 NA      |           | -0.11     | -0.258 NA | NA     |           | 0.082    | 0.101  |
| A019578_01 |    | 0.387     | 0.411     | 0.551     | 0.284     | 0.393  | 0.697     | -0.211   | -0.007 |
| A019579_01 |    | 0.423     | 0.177     | 0.286     | 0.199 NA  |        | -0.093    | -0.092   | -0.191 |
| A019580_01 |    | -0.05     | -0.02     | -0.503    | -0.358    | -0.617 | -0.804    | -0.158   | -0.215 |
| A019582_01 |    | 0.283 NA  |           | 0.009     | -0.253    | 0.333  | 0.135 NA  |          | 0.111  |
| A019583_01 |    | -0.058    | -0.076    | 0.099     | 0.064     | 0.257  | 0.342     | 0.031    | -0.086 |
| A019584_01 |    | 0.074     | 0.218     | -0.137    | -0.126    | 0.224  | 0.337     | -0.263   | -0.079 |
| A019585_01 |    | 0.102     | -0.113    | -0.064    | -0.049    | 0.099  | 0.01      | 0.157    | -0.081 |
| A019587_01 |    | 0.371     | 0.489     | -0.077    | 0.073     | -0.705 | -0.877    | -1.144   | -1.06  |
| A019589_01 |    | 0.161     | -0.089    | -0.05     | 0.163     | 0.141  | 0.208     | -0.035   | -0.138 |
| A019590_01 |    | -0.185    | -0.11     | -0.09     | -0.1      | 0.073  | 0.045     | -0.005   | -0.037 |
| A019591_01 |    | -0.526    | -0.604    | 0.737     | 0.634     | -0.074 | -0.227    | -0.799   | -0.961 |
| A019592_01 |    | -0.092    | 0.022     | -0.114 NA |           | 0.07   | 0.236 NA  | NA       |        |
| A019597_01 |    | -0.125    | -0.144    | -0.049    | 0.083     | -0.102 | -0.182    | 0.058    | 0.14   |
| A019602_01 |    | -0.474    | -0.555    | -0.348 NA |           | -0.37  | -0.127 NA | NA       |        |
| A019604_01 |    | -0.066    | 0.112     | -0.05     | 0.219     | 0.14   | 0.179     | -0.011   | 0.038  |
| A019606_01 |    | -0.134    | -0.188    | -0.659    | -0.507    | 0.111  | 0.485     | 0.21     | 0.111  |
| A019608_01 |    | 0.112     | 0.429     | 0.134     | 0.164     | -0.922 | -0.805    | -1.05    | -0.748 |
| A019609_01 |    | 0.206 NA  |           | 0.229     | 0.191 NA  |        | -0.416 NA |          | -0.261 |
| A019611_01 |    | -0.092    | 0.243     | -0.209    | 0.059     | -0.587 | -0.559    | -0.754   | -0.806 |
| A019612_01 |    | 0.195     | -0.104    | -0.031    | 0.088     | 0.141  | 0.177     | 0.171    | 0.002  |
| A019614_01 |    | -0.207    | -0.179    | -0.117    | -0.151    | -0.001 | -0.028    | -0.039   | -0.043 |
| A019615_01 |    | -0.186 NA |           | 0         | 0.108 NA  |        | 0.004 NA  | NA       |        |
| A019617_01 | NA |           | -0.24     | -0.502    | -0.215 NA |        | -0.22     | 0.144    | -0.099 |
| A019618_01 |    | 0.103 NA  |           | 0.178     | -0.121 NA | NA     | NA        |          | 0.101  |
| A019619_01 |    | 0.224     | 0.059     | 0.088     | 0.045     | -0.302 | -0.444    | -0.119   | -0.15  |
| A019621_01 |    | 0.287 NA  |           | -0.08     | -0.159 NA |        | -0.129 NA |          | -0.212 |
| A019625_01 |    | -0.031    | -0.076    | 0.17      | 0.108     | -0.753 | -1.067    | -0.228   | -0.499 |
| A019626_01 |    | -0.017    | 0.003     | 0.009     | -0.047    | -0.174 | -0.406    | -0.055   | -0.074 |
| A019630_01 |    | -0.153 NA |           | 0.1       | 0.127     | -0.928 | -1.077 NA |          | -0.264 |
| A019632_01 |    | -0.057 NA |           | -0.229 NA |           | 0.006  | 0.218     | 0.044 NA |        |
| A019633_01 |    | -0.336 NA | NA        | NA        |           | -0.303 | -0.34 NA  | NA       |        |
| A019635_01 |    | 0.345     | 0.297     | -0.018    | 0.116     | -0.406 | -0.458    | 0.026    | -0.064 |
| A019636_01 |    | -0.187    | 0.425     | 0.253     | -0.142    | 0.522  | 0.981     | -0.061   | 0.442  |
| A019638_01 |    | -0.615    | -0.397    | -0.057    | -0.005    | -0.525 | -0.396    | -0.173   | -0.088 |
| A019640_01 |    | -0.632 NA |           | 0.104 NA  |           | -0.228 | -0.047 NA | NA       |        |
| A019641_01 |    | -0.36     | -0.531    | -0.208    | -0.229    | -1.349 | -1.413    | -0.256   | -0.239 |

|            |           |           |           |           |        |           |        |        |
|------------|-----------|-----------|-----------|-----------|--------|-----------|--------|--------|
| A019642_01 | -1.375 NA |           | 0.18      | 0.032 NA  | NA     |           | -0.445 | -0.411 |
| A019645_01 | 0.02      | -0.074    | -0.103    | -0.25     | 0.223  | 0.136     | 0.117  | 0.084  |
| A019649_01 | -0.195    | -0.193    | -0.146    | 0.007     | -0.557 | -0.409    | 0.041  | 0.293  |
| A019650_01 | 0.089     | 0.078     | 0.279     | 0.449     | -0.319 | -0.411    | 0.213  | 0.212  |
| A019654_01 | -0.572    | -0.429    | 0.316     | 0.36      | 0.443  | 0.807     | 0.237  | 0.191  |
| A019655_01 | 0.333 NA  |           | 0.313     | 0.162 NA  | NA     | NA        |        | 0.114  |
| A019659_01 | 0.468     | 0.078     | 0.028     | 0.098 NA  |        | -0.124 NA | NA     |        |
| A019662_01 | -0.04     | 0.062     | 0.062     | -0.117    | -0.636 | -0.653    | 0.213  | 0.139  |
| A019663_01 | -0.442    | -0.627    | 0.298     | 0.303     | 0.255  | 0.621     | 0.19   | 0.06   |
| A019666_01 | -0.77     | -0.772    | 1.069     | 0.783     | 1.05   | 1.363     | -0.174 | -0.182 |
| A019668_01 | 0.881     | 0.829     | 0.337     | 0.316     | 0.087  | -0.125    | 0.119  | 0.105  |
| A019672_01 | -0.328    | -0.349    | -0.254    | -0.362    | 0.033  | 0.173     | 0.044  | 0.16   |
| A019674_01 | 0.224     | 0.198     | -0.313    | -0.179    | 0.021  | 0.157     | -0.171 | -0.105 |
| A019675_01 | 0.063     | 0.001     | 0.389     | 0.286     | 0.368  | 0.353     | 0.172  | 0.037  |
| A019677_01 | 0.074 NA  |           | -0.153 NA |           | 0.3    | 0.299 NA  |        | -0.191 |
| A019678_01 | 0.67      | 1.145     | -0.203    | -0.433    | -0.29  | 0.22      | -0.555 | 0.031  |
| A019679_01 | 0.143 NA  |           | -0.16     | -0.234    | 0.331  | 0.45      | 0.225  | 0.085  |
| A019680_01 | -2.769    | -1.854    | -0.849    | -0.809    | -2.839 | -3.375    | -1.318 | -1.305 |
| A019681_01 | 0.102     | 0.06      | -0.209    | -0.251    | 0.035  | 0.085     | -0.024 | -0.086 |
| A019683_01 | -0.063    | -0.229    | -0.133    | -0.17     | -0.128 | -0.219    | 0.32   | 0.179  |
| A019684_01 | -0.405    | -0.326    | 0.067     | -0.033    | 0.014  | 0.004     | 0.292  | 0.244  |
| A019686_01 | 0.332     | -0.063    | 0.33      | 0.025     | 0.663  | 0.62      | 0.294  | 0.128  |
| A019691_01 | 0.115 NA  |           | -0.009    | 0.106 NA  | NA     |           | 0.097  | 0.163  |
| A019692_01 | -0.953    | -0.552    | 0.054     | 0.131     | 0.892  | 1.474     | 0.579  | 0.913  |
| A019695_01 | 0.602     | 0.236     | 0.049     | -0.057    | -0.004 | -0.113    | 0.045  | 0.091  |
| A019698_01 | -0.272    | -0.088    | -0.043    | -0.093    | 0.29   | 0.662     | -0.061 | -0.014 |
| A019699_01 | 0.102     | -0.052    | -0.133    | 0.004     | 0.164  | 0.158     | 0.052  | 0.061  |
| A019707_01 | 0.25 NA   |           | 0.07      | 0.146 NA  |        | -0.184 NA |        | -0.132 |
| A019710_01 | -0.194    | -0.212    | -0.018    | 0.041     | -1.349 | -1.48     | -0.234 | -0.209 |
| A019712_01 | 0.039     | 0.078     | -0.293    | -0.141    | 0.138  | 0.262     | 0.36   | 0.277  |
| A019713_01 | -0.141    | 0.139     | 0.037     | 0.16      | -0.169 | -0.211    | -0.236 | -0.219 |
| A019714_01 | -0.317    | -0.079    | -0.249    | -0.251    | -0.028 | 0.063     | 0.114  | 0.216  |
| A019718_01 | -0.436    | -0.398    | -0.267    | -0.408    | -0.367 | -0.678    | -0.983 | -1.02  |
| A019719_01 | 0.078     | 0.092     | -0.082    | 0.005     | -0.036 | 0.006     | 0.191  | 0.223  |
| A019724_01 | 0.637     | 0.389     | 0.566     | 0.318     | 0.596  | 0.641     | -0.149 | -0.197 |
| A019725_01 | 0.297 NA  |           | 0.193     | 0.058     | -0.537 | -0.747 NA |        | -0.229 |
| A019726_01 | 0.352 NA  |           | 0.726     | 0.571     | 0.245  | 0.314 NA  | NA     |        |
| A019730_01 | -0.087    | 0.141 NA  | NA        |           | 0.115  | 0.056 NA  |        | -0.096 |
| A019732_01 | -0.301    | -0.057    | 0.005     | -0.116    | -0.013 | 0.169     | -0.008 | 0.269  |
| A019733_01 | -0.346    | -0.283    | 0.185     | 0.079     | 0.03   | 0.374     | -0.495 | -0.136 |
| A019734_01 | 0.177 NA  |           | 0.279     | 0.179 NA  |        | -0.331 NA |        | -0.423 |
| A019738_01 | 0.169 NA  |           | 0.154     | 0.129     | -0.154 | -0.277    | 0.001  | -0.091 |
| A019741_01 | -0.518    | -0.494    | -0.656    | -0.682    | -0.455 | -0.445    | -0.218 | -0.047 |
| A019744_01 | -0.242    | -0.489    | 0.309     | 0.192     | 0.201  | 0.329     | 0.223  | 0      |
| A019745_01 | -0.046 NA | NA        | NA        | NA        | NA     | NA        | NA     | NA     |
| A019748_01 | -1.406 NA |           | 0.193     | -0.031 NA | NA     |           | -1.319 | -1.207 |
| A019749_01 | 0.033     | -0.045    | -0.04     | 0.01      | -0.147 | -0.098    | 0.193  | 0.013  |
| A019750_01 | 0.146 NA  |           | -0.06 NA  | NA        |        | -0.363 NA | NA     |        |
| A019751_01 | 0.117     | 0.128     | -0.075    | -0.073    | 0.108  | 0.189     | 0.123  | 0.113  |
| A019754_01 | 0.23      | 0.152     | 0.055     | -0.233    | 0.266  | -0.05     | 0.094  | -0.068 |
| A019755_01 | -0.809    | -0.724    | 0.117 NA  |           | 0.878  | 1.221 NA  | NA     |        |
| A019756_01 | -0.288    | -0.171    | -0.304    | -0.506    | -0.015 | 0.171     | -0.018 | 0.303  |
| A019758_01 | -0.485    | -0.255    | -0.552    | -0.648    | 0.42   | 0.728     | -0.076 | -0.12  |
| A019761_01 | -0.581    | -0.585 NA |           | 0.08      | -0.741 | -0.897    | -0.794 | -1.052 |
| A019763_01 | -0.011    | 0.055     | 0.212     | 0.152     | -0.054 | -0.32     | -0.096 | -0.123 |
| A019766_01 | -0.336    | -0.198    | 0.007     | 0.144     | -0.389 | -0.064    | 0.026  | 0.243  |
| A019768_01 | 0.231     | 0.414     | -0.052    | -0.104    | -0.076 | -0.184    | -0.185 | -0.064 |
| A019771_01 | -0.698    | -0.511    | 0.008     | -0.097    | -0.168 | -0.22     | -0.379 | -0.474 |
| A019774_01 | -0.091    | -0.137    | -0.357    | -0.155    | 0.305  | 0.47      | 0.246  | 0.16   |
| A019779_01 | -0.052 NA | NA        |           | -0.394 NA | NA     | NA        |        | -0.742 |
| A019781_01 | 0.04      | -0.252    | 0.268     | 0.166     | 0.552  | 0.728     | -0.588 | -0.886 |
| A019783_01 | -0.002    | -0.107    | -0.043    | -0.215    | 0.201  | 0.108     | -0.063 | -0.177 |
| A019785_01 | 0.123 NA  |           | 0.015     | -0.13     | 0.471  | 0.599     | 0.545  | 0.338  |
| A019791_01 | 0.456     | 0.105     | 0.107     | 0.31      | 0.01   | -0.129    | 0.231  | 0.013  |
| A019793_01 | -0.413    | -0.275    | -0.018    | -0.068    | -0.144 | -0.046    | -0.061 | -0.081 |
| A019794_01 | 0.038 NA  |           | 0.307     | 0.337     | 0.017  | -0.05     | -0.112 | -0.072 |
| A019796_01 | -0.072    | -0.14     | -0.078    | -0.067    | -0.205 | -0.151    | -0.027 | -0.107 |
| A019797_01 | 0.496 NA  |           | 0.413     | 0.231 NA  | NA     | NA        |        | -0.186 |

|            |    |        |        |        |        |        |        |        |
|------------|----|--------|--------|--------|--------|--------|--------|--------|
| A019799_01 | NA | NA     | 0.161  | 0.288  | NA     | 0.568  | -0.002 | 0.025  |
| A019801_01 |    | -0.067 | 0.055  | 0.143  | 0.025  | 0.208  | 0.204  | 0.069  |
| A019805_01 |    | 0.017  | -0.015 | -0.416 | -0.144 | -0.043 | -0.054 | 0.159  |
| A019806_01 |    | 0.153  | 0.087  | 0.041  | 0.114  | 0.077  | 0.263  | 0.145  |
| A019810_01 |    | 0.464  | 0.228  | 0.021  | -0.092 | 0.394  | 0.318  | 0.274  |
| A019812_01 |    | 0.151  | 0.378  | -0.069 | 0.006  | -0.003 | 0.022  | -0.088 |
| A019813_01 |    | -0.482 | -0.639 | -0.255 | 0.208  | -0.588 | -0.457 | NA     |
| A019815_01 |    | 0.063  | 0.003  | -0.025 | -0.184 | 0.244  | 0.163  | -0.025 |
| A019818_01 |    | -0.244 | NA     | 0.155  | 0.12   | 0.156  | 0.045  | NA     |
| A019820_01 |    | -0.448 | -0.549 | -0.125 | -0.076 | -0.494 | -0.617 | 0.17   |
| A019822_01 |    | 0.502  | 0.415  | 0.208  | 0.127  | 0.312  | 0.145  | -0.08  |
| A019823_01 |    | -0.123 | -0.003 | -0.095 | -0.181 | 0.093  | 0.041  | 0.233  |
| A019826_01 |    | 0.265  | 0.198  | 0.329  | 0.282  | 0.035  | 0.034  | -0.237 |
| A019828_01 |    | -0.096 | -0.357 | -0.336 | -0.312 | -0.501 | -0.335 | -0.081 |
| A019829_01 |    | -0.014 | 0.416  | -0.159 | -0.04  | -0.008 | 0.06   | 0.022  |
| A019830_01 |    | 0.089  | 0.053  | -0.181 | -0.222 | 0.278  | 0.383  | NA     |
| A019831_01 |    | 0.3    | 0.158  | -0.225 | -0.179 | 0.381  | 0.401  | 0.279  |
| A019834_01 |    | -0.302 | -0.676 | 0.056  | -0.051 | 0.36   | 0.381  | -0.091 |
| A019840_01 |    | -0.551 | -0.484 | -0.322 | -0.147 | -0.472 | -0.319 | 0.069  |
| A019842_01 | NA | NA     |        | -0.191 | -0.288 | NA     | -0.366 | 0.264  |
| A019843_01 |    | -1.28  | -1.208 | 0.201  | 0.382  | -0.123 | 0.114  | -0.049 |
| A019846_01 |    | 0.09   | 0.104  | 0.09   | -0.027 | 0.041  | 0.113  | -0.119 |
| A019848_01 |    | 0.217  | 0.084  | 0.21   | 0.16   | 0.238  | 0.423  | 0.038  |
| A019851_01 |    | 0.289  | 0.16   | 0.65   | 0.304  | 0.446  | 0.434  | NA     |
| A019854_01 |    | 0.123  | 0.262  | 0.217  | 0.081  | 0.23   | 0.32   | -0.224 |
| A019855_01 |    | -0.206 | 0.116  | 0.119  | 0.235  | -1.094 | -1.521 | -0.645 |
| A019857_01 |    | 0.231  | 0.14   | -0.063 | -0.068 | -0.246 | -0.163 | -0.253 |
| A019858_01 |    | -0.668 | -0.593 | 0.036  | 0.01   | -0.808 | -0.952 | -0.14  |
| A019861_01 |    | -0.601 | -0.464 | -0.499 | -0.429 | -0.134 | 0.199  | -0.017 |
| A019865_01 |    | 0.112  | -0.07  | 0.162  | -0.001 | 0.079  | -0.042 | 0.352  |
| A019866_01 |    | -0.712 | -0.523 | -0.158 | -0.256 | -0.272 | 0.023  | -0.297 |
| A019870_01 |    | 0.158  | -0.018 | 0.118  | 0.176  | 0.043  | 0.149  | -0.033 |
| A019872_01 |    | 0.093  | 0.134  | 0.243  | 0.045  | NA     | -0.424 | NA     |
| A019874_01 |    | 0.033  | 0.263  | -0.33  | -0.289 | 0.206  | 0.422  | 0.358  |
| A019876_01 |    | 0.23   | NA     | 0.103  | 0.056  | 0.133  | -0.07  | 0.167  |
| A019877_01 |    | 0.151  | -0.01  | -0.015 | -0.027 | 0.008  | -0.091 | 0.091  |
| A019880_01 |    | -0.072 | 0.012  | -0.015 | 0      | 0.199  | 0.266  | 0.039  |
| A019882_01 |    | -0.107 | -0.188 | -0.275 | -0.184 | -1.081 | -1.151 | -0.239 |
| A019885_01 |    | -0.165 | -0.146 | -0.326 | -0.14  | -0.931 | -0.858 | -0.348 |
| A019886_01 |    | 0.261  | 0.192  | 0.26   | 0.207  | -0.712 | -0.797 | 0.349  |
| A019887_01 |    | -0.488 | -0.371 | -0.209 | -0.091 | -1.064 | -1.122 | -0.437 |
| A019891_01 |    | -0.155 | NA     | -0.122 | -0.129 | NA     | NA     | 0.094  |
| A019892_01 |    | 0.04   | -0.087 | -0.158 | -0.109 | 0.574  | 0.824  | -0.078 |
| A019893_01 |    | 0.653  | 0.543  | 0.268  | 0.17   | 1.016  | 1.152  | -0.121 |
| A019894_01 |    | -0.172 | 0.129  | 0.029  | -0.009 | 0.013  | 0.167  | 0.05   |
| A019895_01 |    | -0.837 | -0.83  | -0.437 | -0.09  | -0.727 | -0.639 | -0.395 |
| A019897_01 |    | -0.118 | NA     | NA     | -0.044 | NA     | NA     | -0.146 |
| A019898_01 |    | -0.186 | 0.032  | -0.051 | 0.012  | -0.021 | 0.007  | 0.202  |
| A019899_01 |    | 0.053  | 0.062  | -0.105 | -0.16  | -0.167 | -0.296 | 0.222  |
| A019900_01 |    | 0.221  | 0.133  | -0.234 | -0.27  | 0.207  | 0.104  | 0.016  |
| A019901_01 |    | 0.247  | 0.279  | -0.017 | 0.003  | 0.235  | 0.197  | 0.022  |
| A019904_01 |    | 0.025  | -0.135 | -0.023 | -0.002 | -0.193 | -0.387 | 0.22   |
| A019905_01 |    | -0.034 | 0.036  | -0.07  | 0.207  | -0.393 | -0.47  | -0.032 |
| A019916_01 |    | -0.016 | 0.194  | 0.247  | -0.037 | 0.323  | 0.337  | -0.146 |
| A019918_01 |    | -0.124 | NA     | NA     | 0.161  | NA     | 0.018  | NA     |
| A019919_01 |    | 0.995  | 0.916  | NA     | 0.448  | -0.564 | -0.701 | NA     |
| A019923_01 |    | 0.107  | -0.012 | 0.057  | 0.129  | 0.212  | 0.369  | 0.171  |
| A019926_01 |    | 0.233  | 0.183  | -0.251 | -0.414 | 0.544  | 0.724  | NA     |
| A019927_01 |    | 0.161  | NA     | 0.262  | NA     | 0.49   | 0.49   | NA     |
| A019929_01 |    | -0.161 | 0.113  | 0.035  | -0.227 | 0.073  | 0.297  | -0.116 |
| A019934_01 |    | -0.262 | 0.007  | 0.137  | -0.25  | -0.58  | -0.67  | 0.01   |
| A019935_01 |    | 0.027  | -0.009 | -0.395 | -0.18  | -0.068 | 0.064  | -0.065 |
| A019936_01 |    | -0.078 | -0.142 | 0.089  | -0.007 | -0.328 | -0.66  | 0.098  |
| A019940_01 |    | -0.356 | -0.189 | 0.16   | 0.361  | 0.002  | 0.291  | -0.032 |
| A019941_01 |    | 0.354  | 0.432  | 0.403  | 0.281  | 0.541  | 0.53   | -0.043 |
| A019942_01 |    | 0.014  | 0.142  | 0.397  | 0.312  | 0.653  | 0.858  | 0.292  |
| A019943_01 |    | -0.075 | NA     | 0      | -0.091 | NA     | -0.395 | 0.367  |
| A019944_01 | NA | NA     |        | 0.009  | -0.364 | NA     | -0.707 | NA     |

|            |          |           |           |           |           |        |           |        |        |
|------------|----------|-----------|-----------|-----------|-----------|--------|-----------|--------|--------|
| A019946_01 |          | 0.466     | 0.361     | 0.401     | 0.406     | -0.494 | -0.949    | -0.034 | -0.231 |
| A019947_01 |          | -0.064    | -0.217    | -0.2      | -0.177    | -0.227 | -0.412    | 0.096  | 0.067  |
| A019949_01 |          | -0.247    | -0.015    | 0.001     | -0.093    | 0.053  | 0.382     | -0.038 | 0.317  |
| A019952_01 |          | -0.054    | -0.162    | 0.314     | 0.4       | -0.441 | -0.475    | -0.428 | -0.598 |
| A019953_01 |          | -0.339    | 0.218     | 0.019     | -0.108    | 0.047  | 0.516     | -0.134 | 0.682  |
| A019954_01 |          | 0.382     | 0.157     | 0.076     | 0.291     | 0.152  | 0.165     | -0.027 | -0.261 |
| A019957_01 | NA       |           | -0.055    | -0.246    | -0.193    | -0.579 | -0.518    | -0.055 | -0.017 |
| A019958_01 |          | 0.356     | -0.072    | -0.254    | -0.348    | 0.392  | 0.206     | 0.362  | 0.018  |
| A019964_01 |          | -0.017    | 0.045     | 0.556     | 0.432     | 0.859  | 0.983     | 0.414  | 0.428  |
| A019965_01 |          | -0.065    | -0.001    | -0.018    | 0.005     | -0.628 | -0.535    | 0.052  | 0.32   |
| A019968_01 |          | -0.233    | -0.269    | 0.072     | 0.08      | -0.181 | -0.232    | 0.248  | 0.265  |
| A019969_01 |          | -0.155    | -0.191    | -0.064    | -0.047    | -0.053 | -0.146    | 0.319  | 0.132  |
| A019970_01 |          | -0.263    | -0.171    | -0.197    | -0.162    | 0.159  | 0.361     | -0.32  | -0.002 |
| A019971_01 |          | -0.014    | 0.438     | -0.103    | -0.151    | -0.038 | 0.455     | -0.29  | 0.308  |
| A019972_01 | 0.099 NA |           |           | -0.075    | 0.02 NA   |        | -0.109    | 0.184  | -0.073 |
| A019973_01 |          | -0.018    | -0.229    | -0.101    | -0.093    | -0.26  | -0.229    | 0.149  | -0.132 |
| A019975_01 |          | -0.009    | -0.148    | 0.195     | 0.093     | 0.52   | 0.677     | 0.082  | 0.106  |
| A019976_01 |          | -1.187    | -0.938    | 1.451     | 1.074     | 1.386  | 1.868     | 0.208  | 0.416  |
| A019977_01 |          | 0.057     | -0.065    | -0.069    | -0.181    | 0.158  | 0.275     | 0.1    | 0.143  |
| A019978_01 | 0.225 NA |           |           | 0.126     | 0.13 NA   |        | -0.288 NA | NA     |        |
| A019982_01 |          | -0.001    | -0.137    | -0.028    | 0.099     | -0.269 | -0.393    | 0.004  | -0.066 |
| A019983_01 |          | -0.139    | -0.162    | -0.165    | -0.105    | 0.132  | 0.1       | 0.118  | 0.131  |
| A019985_01 |          | -0.135    | -0.067    | -0.248    | -0.131    | 0.284  | 0.426     | 0.092  | 0.066  |
| A019987_01 |          | 0.06 NA   | NA        | NA        |           | 0.249  | 0.19 NA   |        | 0.059  |
| A019991_01 | NA       |           | -0.433    | -0.28     | -0.086    | -0.797 | -0.849    | -0.24  | -0.224 |
| A019995_01 |          | 0.241     | 0.455     | -0.168    | 0.002     | 0.492  | 0.661     | 0.018  | 0.013  |
| A019997_01 |          | 0.331     | -0.007    | -0.007    | 0.085     | -0.442 | -0.393    | -0.232 | -0.187 |
| A020001_01 |          | -0.831    | -0.642    | 0.055     | 0.012     | -1.141 | -0.995    | -0.24  | 0.261  |
| A020005_01 |          | 0.769     | 0.589     | 0.013     | -0.237    | 0.114  | -0.276    | 0.263  | 0.125  |
| A020008_01 |          | -0.555    | -0.378    | -0.13     | -0.197    | 0.003  | 0.321     | -0.267 | 0.069  |
| A020009_01 |          | -0.199    | -0.113    | 0.399     | 0.166     | 0.594  | 0.739     | 0.042  | 0.052  |
| A020012_01 |          | -0.168    | -0.202 NA | NA        |           | -0.356 | -0.404 NA | NA     |        |
| A020014_01 |          | -0.994    | -0.616    | 0.059     | 0.075 NA  |        | -2.453 NA |        | -1.083 |
| A020016_01 |          | -0.241    | 0.109     | -0.705    | -0.477    | -1.05  | -1.175    | -0.743 | -0.604 |
| A020017_01 |          | 0.905     | 0.437     | -0.333    | -0.248    | 0.092  | -0.029    | -0.136 | -0.487 |
| A020022_01 |          | 0.26 NA   |           | 0.026     | 0.044 NA  | NA     |           | -0.096 | -0.378 |
| A020023_01 |          | 0.3       | 0.132     | -0.081    | -0.17     | 0.206  | 0.111     | 0.253  | 0.091  |
| A020025_01 |          | -0.102    | -0.157    | 0.036     | 0.004     | -0.087 | -0.181    | -0.026 | -0.127 |
| A020031_01 |          | -0.092    | -0.171    | 0.069     | -0.045    | -0.247 | -0.418    | 0.194  | 0.014  |
| A020033_01 |          | -0.015    | 0.154     | 0.077     | -0.158    | 0.688  | 0.814     | -0.028 | 0.005  |
| A020035_01 |          | -0.077 NA |           | 0.452     | 0.541     | -0.297 | -0.151    | -0.498 | -0.35  |
| A020036_01 |          | 0.239 NA  |           | 0.036     | 0.023 NA  |        | -0.462    | 0.192  | -0.01  |
| A020037_01 |          | -0.23     | -0.082    | -0.018    | 0.051     | -0.233 | -0.224    | 0.027  | 0.081  |
| A020039_01 | NA       |           | -0.911    | -0.077    | -0.368    | -0.798 | -0.725    | -0.117 | -0.22  |
| A020041_01 |          | -0.053 NA |           | 0.162 NA  | NA        |        | 0.26 NA   | NA     |        |
| A020042_01 |          | 0.198 NA  |           | -0.744 NA |           | 0.246  | 0.391 NA  |        | 0.152  |
| A020043_01 |          | 0.353 NA  |           | -0.087    | -0.031 NA |        | 0.23 NA   |        | -0.179 |
| A020045_01 |          | 0.367     | 0.41      | -0.804    | -0.469    | 0.253  | 0.393     | 0.495  | 0.478  |
| A020046_01 |          | -0.17     | -0.239    | -0.226    | -0.005    | 0.073  | 0.262     | 0.279  | 0.138  |
| A020047_01 |          | 0.084     | -0.11     | -0.092    | -0.174    | 0.14   | 0.062     | 0.157  | -0.112 |
| A020048_01 |          | -0.32     | -0.377    | -0.066    | -0.129    | -0.41  | -0.436    | -0.094 | -0.136 |
| A020050_01 |          | -1.201 NA |           | -0.477    | -0.487    | -1.745 | -1.453 NA | NA     |        |
| A020053_01 |          | 0.075     | 0.195     | -0.227    | -0.118    | 0.305  | 0.611     | -0.135 | -0.172 |
| A020054_01 |          | -0.064    | 0.032     | 0.115     | 0.1       | -0.447 | -0.437    | -0.071 | -0.085 |
| A020055_01 |          | -0.044    | -0.086    | -0.442    | -0.434    | 0.162  | 0.258     | -0.035 | 0.159  |
| A020056_01 |          | -0.088    | -0.151    | -0.256    | -0.259    | 0.07   | 0.239     | 0.076  | 0.087  |
| A020060_01 |          | 0.375     | 0.319     | 0.164     | 0.255     | -0.196 | -0.413    | -0.212 | -0.237 |
| A020061_01 |          | 0.332     | 0.336     | -0.153    | -0.222    | -0.047 | 0.052     | 0.382  | 0.434  |
| A020062_01 |          | 0.021     | 0.557     | 0.019     | -0.025    | 0.321  | 0.52      | -0.003 | 0.457  |
| A020064_01 |          | 0.795 NA  |           | 0.534     | 0.386     | 0.682  | 0.414     | 0.09   | 0.066  |
| A020065_01 |          | 0.563     | 0.364     | 0.218     | 0.203     | 0.285  | 0.298     | -0.089 | -0.125 |
| A020068_01 |          | 0.43      | 0.759     | -0.305    | -0.437    | -0.163 | 0.099 NA  |        | -0.109 |
| A020070_01 |          | 0.394     | 0.102     | -0.872    | -0.735    | -0.269 | -0.349    | -0.665 | -0.519 |
| A020071_01 |          | 0.084     | 0.414     | -1.185    | -1.372    | -0.176 | -0.231    | -0.527 | -0.071 |
| A020072_01 |          | -0.027    | -0.172    | 0.136     | -0.016    | -0.279 | -0.428    | 0      | -0.053 |
| A020073_01 |          | 0.058     | -0.135    | -0.044    | -0.029    | 0.124  | 0.053     | 0.314  | 0.041  |
| A020074_01 |          | -0.148    | -0.263    | 0.026     | -0.009    | 0.134  | 0.035     | -0.115 | -0.167 |
| A020075_01 |          | -0.035 NA |           | 0.154     | 0.416     | 0.127  | 0.038     | 0.042  | 0.124  |



|            |           |          |           |          |        |           |        |        |
|------------|-----------|----------|-----------|----------|--------|-----------|--------|--------|
| A020076_01 | 0.034     | 0.179 NA |           | -0.507   | -0.522 | -0.636    | -0.167 | -0.053 |
| A020077_01 | -0.156    | -0.431   | -0.161    | -0.253   | -0.145 | 0.181     | -0.061 | 0.218  |
| A020078_01 | -0.123    | -0.249   | -0.255 NA |          | -0.179 | -0.077 NA |        | 0.311  |
| A020082_01 | 0.34      | 0.208    | 0.002     | -0.157   | 0.325  | 0.247     | 0.247  | 0.026  |
| A020083_01 | -0.051    | -0.026   | 0.022     | 0.131    | -0.013 | 0.233     | 0.25   | 0.461  |
| A020086_01 | -0.179    | -0.027   | -0.084    | 0.027    | -0.726 | -0.738    | -0.339 | -0.32  |
| A020089_01 | 0.068     | -0.118   | -0.069    | -0.187   | 0.241  | 0.279     | 0.214  | 0.132  |
| A020090_01 | 0.155 NA  |          | -0.066    | 0.062    | 0.181  | 0.153     | -0.177 | -0.001 |
| A020091_01 | 0.139     | 0.129    | -0.234    | -0.261   | 0.196  | 0.217     | 0.139  | 0.04   |
| A020092_01 | -0.032    | 0.108    | -0.033    | 0.088    | -0.237 | 0.029     | -0.304 | 0.185  |
| A020098_01 | 0.252     | 0.183    | -0.046    | -0.001   | 0.089  | 0.115     | 0.159  | 0.045  |
| A020099_01 | -0.247    | -0.046   | -0.089    | 0.14     | -0.2   | -0.219    | 0.058  | 0.091  |
| A020100_01 | -0.073    | -0.106   | 0.039     | -0.07    | 0.145  | 0.025     | 0.151  | -0.052 |
| A020101_01 | 0.011     | -0.015   | 0.094     | 0.149    | -0.301 | -0.288    | 0.105  | -0.043 |
| A020102_01 | -0.084    | -0.029   | -0.398    | -0.284   | 0.129  | 0.277     | -0.19  | 0.003  |
| A020103_01 | -0.067    | -0.116   | 0.219     | 0.086    | 0.389  | 0.506     | 0.019  | 0      |
| A020104_01 | -0.306    | -0.273   | 0.211     | 0.199    | -0.106 | 0.028     | -0.41  | -0.403 |
| A020105_01 | -0.073    | 0.108    | -0.424    | -0.512   | 0.573  | 0.763     | 0.219  | 0.316  |
| A020107_01 | -0.375    | -0.101   | -0.171    | -0.078   | 0.043  | 0.159     | 0.075  | 0.098  |
| A020109_01 | 0.483     | 0.775    | -0.193    | 0.085    | -0.102 | -0.199    | 0.029  | 0.178  |
| A020116_01 | 0.086     | 0.009    | 0.003     | -0.031   | 0.478  | 0.647     | 0.26   | 0.309  |
| A020119_01 | 0.318     | 0.067    | 0.038     | -0.371   | 0.315  | 0.245     | -0.346 | -0.198 |
| A020120_01 | -0.202    | -0.119   | 0.104     | 0.141    | -0.374 | -0.386    | 0.049  | 0.11   |
| A020121_01 | 0.094     | 0.074    | -0.19     | -0.258   | 0.129  | 0.239     | 0.317  | 0.221  |
| A020122_01 | -0.002    | 0.113    | 0.257     | 0.234    | 0.358  | 0.326     | -0.016 | 0.086  |
| A020123_01 | -0.087 NA |          | -0.016    | -0.121   | 0.179  | 0.109     | 0.232  | 0.124  |
| A020125_01 | -0.196    | -0.381   | -0.319    | -0.305   | -0.082 | 0.083     | 0.11   | 0.244  |
| A020126_01 | -0.183    | 0.052    | -0.087    | -0.194   | 0.39   | 0.566     | -0.022 | 0.163  |
| A020128_01 | -0.011    | 0.056    | 0.04      | 0.003    | -0.246 | -0.104    | -0.038 | -0.05  |
| A020130_01 | 0.028 NA  |          | 0.143 NA  |          | 0.036  | -0.044 NA | NA     |        |
| A020132_01 | 0.128     | -0.089   | -0.283    | -0.24    | -0.049 | -0.133    | 0.325  | 0.099  |
| A020134_01 | 0.06      | -0.049   | 0.078     | 0.063 NA |        | -0.203    | -0.058 | -0.147 |
| A020135_01 | -0.177    | -0.265   | 0.182     | 0.341    | 0.397  | 0.541     | 0.23   | 0.228  |
| A020140_01 | 0.083     | -0.052   | -0.363    | -0.408   | -0.264 | 0.002     | 0.187  | 0.109  |
| A020141_01 | 0.056     | -0.021   | 0.101     | -0.069   | -0.086 | 0.028     | -0.138 | -0.072 |
| A020144_01 | 0.257     | 0.362    | 0.205     | 0.099    | -0.355 | -0.42     | -0.558 | -0.636 |
| A020145_01 | 0.268     | 0.333    | 0.125     | -0.027   | -0.179 | -0.254    | -0.62  | -0.599 |
| A020155_01 | 0.01      | 0.268    | -0.016    | -0.062   | -0.404 | -0.37     | -0.099 | 0.062  |
| A020157_01 | 0.119     | 0.088    | -0.036    | -0.178   | 0.042  | 0.222     | -0.387 | -0.193 |
| A020160_01 | 0.238     | 0.316    | -0.112    | -0.239   | 0.447  | 0.404     | 0.264  | 0.289  |
| A020162_01 | 0         | 0.241    | 0.207     | 0.41     | 0.12   | 0.292     | -0.264 | -0.379 |
| A020164_01 | 0.284 NA  |          | -0.48 NA  | NA       |        | -0.004 NA | NA     |        |
| A020166_01 | 0.132 NA  | NA       |           | -0.143   | 0.164  | -0.017 NA | NA     |        |
| A020167_01 | 0.256     | 0.247    | -0.241    | -0.194   | -0.107 | -0.169    | 0.251  | 0.364  |
| A020169_01 | -0.195    | -0.2     | -0.538    | -0.49    | 0.069  | 0.316     | 0.032  | -0.02  |
| A020170_01 | -0.281    | -0.366   | 0.259     | 0.059    | 0.04   | 0.049     | -0.396 | -0.427 |
| A020171_01 | -0.243    | 0.026    | 0.159     | 0.19     | 0.433  | 0.797     | 0.228  | 0.445  |
| A020172_01 | -0.037    | 0.053    | 0.195     | 0.388    | 0.1    | 0.197     | -0.029 | -0.071 |
| A020173_01 | -0.072    | -0.025   | 0.099     | 0.108    | 0.083  | 0.131     | 0.018  | 0.008  |
| A020178_01 | 0.316     | -0.201   | -0.384    | -0.526   | -0.137 | -0.18     | 0.098  | -0.168 |
| A020179_01 | 0.526     | 0.46     | -0.286    | -0.507   | 0.23   | -0.011    | -0.29  | -0.213 |
| A020183_01 | -0.377 NA |          | -0.08 NA  |          | -0.112 | 0.074 NA  |        | -0.123 |
| A020186_01 | -1.302    | -1.116   | 0.424     | 0.324    | 0.896  | 1.261     | 0.288  | 0.387  |
| A020187_01 | -1.451    | -0.964   | 1.18      | 1.198    | 1.215  | 1.927     | 0.652  | 0.983  |
| A020188_01 | 0.015 NA  |          | 0.166     | 0.003    | -0.26  | -0.387    | 0.371  | 0.051  |
| A020189_01 | 0.28      | 0.068    | -0.125    | -0.206   | 0.144  | 0.115     | 0.318  | 0.049  |
| A020190_01 | -0.096 NA |          | -0.044    | -0.067   | -0.056 | -0.093    | 0.001  | -0.186 |
| A020192_01 | -0.081    | -0.248   | -0.354    | -0.279   | 0.017  | 0.23      | 0.041  | -0.042 |
| A020195_01 | -0.293    | -0.28    | -0.135    | -0.182   | -0.119 | -0.029    | 0.204  | 0.174  |
| A020196_01 | 0.055     | 0.097    | 0.035     | 0.172    | -0.118 | 0.074     | -0.026 | -0.156 |
| A020197_01 | -0.446    | -0.643   | -0.144    | -0.146   | -0.665 | -0.704    | 0.17   | 0.153  |
| A020198_01 | 0.099 NA  |          | 0.181     | 0.117 NA |        | -0.672    | -0.058 | -0.096 |
| A020199_01 | -0.029    | 0.109    | -0.101    | -0.34    | 0.151  | 0.398     | 0.116  | 0.427  |
| A020200_01 | 0.269     | 0.113    | -0.196    | -0.051   | 0.163  | 0.357     | 0.268  | 0.134  |
| A020203_01 | -0.167    | -0.007   | 0.526     | 0.215    | 0.084  | -0.087    | -0.217 | -0.251 |
| A020205_01 | -0.121    | 0.1      | -0.045    | 0.192    | 0.171  | 0.377     | 0.155  | 0.079  |
| A020208_01 | -0.122    | -0.324   | -0.168    | -0.202   | -0.543 | -0.745    | 0.343  | 0.388  |
| A020210_01 | 0.072     | 0.299    | 0.216     | 0.216    | -0.281 | -0.443    | -0.1   | -0.1   |

|            |           |           |           |           |          |           |           |        |
|------------|-----------|-----------|-----------|-----------|----------|-----------|-----------|--------|
| A020211_01 | 0.328     | 0.279     | 0.259     | 0.396     | 0.341    | 0.347     | 0.214     | 0.273  |
| A020213_01 | -0.106 NA |           | 0.514     | 0.243     | -0.525   | -0.704    | 0.01      | -0.361 |
| A020214_01 | 0.769     | 0.599     | 0.715     | 0.452     | 0.278    | -0.078    | -0.28     | -0.323 |
| A020215_01 | 0.039     | 0.023     | 0.06      | 0.111     | -0.032   | -0.099    | 0.148     | 0.036  |
| A020216_01 | -0.405 NA |           | 0.003 NA  |           | -0.273   | -0.034 NA | NA        |        |
| A020217_01 | -1.792    | -1.135    | -1.957    | -1.836    | -2.53    | -2.925    | -1.121    | -1.647 |
| A020219_01 | 0.097 NA  | NA        |           | 0.288     | -0.082   | -0.203 NA | NA        |        |
| A020221_01 | 0.218     | 0.283     | -0.298    | -0.283    | 0.321    | 0.555     | 0.196     | 0.366  |
| A020222_01 | 0.229     | 0.434     | 0.171     | 0.231     | 0.23     | 0.395     | 0.271     | 0.34   |
| A020225_01 | 0.363     | 0.517     | -1.137    | -1.115    | 0.715    | 0.757     | 0.619     | 0.685  |
| A020226_01 | -0.07     | 0.115     | -0.063    | -0.144    | 0.24     | 0.294     | 0.139     | 0.028  |
| A020228_01 | 0.095     | 0.159     | 0.319     | -0.119    | 0.064 NA |           | -0.514    | -0.555 |
| A020229_01 | -0.141    | -0.197    | -0.029    | -0.207    | -0.204   | -0.17     | 0.149     | 0.273  |
| A020233_01 | 0.019     | 0.103     | 0.022     | 0.086     | 0.266    | 0.337     | 0.035     | -0.085 |
| A020236_01 | 0.195 NA  |           | 0.099     | -0.068    | -0.138   | 0.131     | 0.246 NA  |        |
| A020241_01 | -0.006    | -0.023 NA |           | -0.142    | 0.124    | 0.244     | 0.226     | 0.295  |
| A020242_01 | 0.397     | 0.661     | 0.229     | 0.247     | -2.988   | -3.568    | 0.07      | 0.32   |
| A020243_01 | 0.325     | 0.215     | 0         | -0.14     | 0.474    | 0.458     | 0.228     | 0.261  |
| A020245_01 | 0.07      | 0.204     | 0.123     | -0.021 NA |          | -0.576    | -0.111 NA |        |
| A020249_01 | -0.002    | 0.013     | -0.097    | -0.081    | 0.018    | -0.019    | -0.072    | -0.232 |
| A020250_01 | -0.165    | -0.226    | -0.044    | 0.117     | 0.127    | 0.135     | 0.045     | -0.011 |
| A020251_01 | 0.106     | -0.095    | 0.321     | 0.381     | 0.001    | 0.042     | -0.204    | -0.299 |
| A020254_01 | 0.19      | 0.251     | -0.016    | 0.219     | -0.265   | -0.533    | -0.221    | 0.267  |
| A020256_01 | 0.037     | 0.287     | -0.194    | -0.236    | -0.138   | -0.173    | 0.116     | 0.162  |
| A020257_01 | -0.083    | -0.086    | -0.044    | -0.034    | 0.445    | 0.594     | -0.152    | -0.001 |
| A020258_01 | -0.762    | -0.479    | 0.134     | 0.43      | 1.009    | 1.51      | 0.599     | 0.672  |
| A020260_01 | 0.326     | 0.068     | -0.224    | -0.316    | 0.08     | 0.064     | 0.132     | -0.13  |
| A020264_01 | -0.126    | -0.239    | -0.367    | 0.041     | -0.428   | -0.076    | -0.115    | -0.13  |
| A020265_01 | -0.487 NA |           | 0.025 NA  |           | -0.129   | -0.012 NA | NA        |        |
| A020267_01 | 0.006     | -0.011    | 0.149     | -0.062    | -0.561   | -0.567    | 0.014     | 0.343  |
| A020268_01 | -0.108    | -0.108    | -0.258    | -0.422    | 0.104    | 0.206     | 0.252     | 0.44   |
| A020272_01 | -0.245    | -0.313    | 0.02      | 0.015     | -0.246   | -0.394    | -0.148    | -0.084 |
| A020273_01 | 0.317     | 0.432     | -0.105    | -0.238    | -0.285   | -0.686    | -0.089    | -0.195 |
| A020274_01 | -0.089    | -0.061    | -0.168 NA |           | -0.485   | -0.436    | -0.038 NA |        |
| A020281_01 | -0.094    | 0.014     | -0.069    | -0.005    | 0.02     | 0.067     | -0.214    | -0.178 |
| A020283_01 | 0.246 NA  |           | 0.053     | -0.032    | -0.263   | -0.305    | 0.009     | -0.176 |
| A020286_01 | -0.303    | -0.459    | -0.969    | -1.028    | -0.955   | -0.949 NA |           | -1.311 |
| A020289_01 | 0.573     | 0.517     | -0.514    | -0.289    | 0.11     | 0.076     | 0.631     | 0.629  |
| A020290_01 | 0.521     | 0.253     | -0.096    | -0.219    | 0.491    | 0.114     | 0.344     | 0.248  |
| A020291_01 | -0.271    | -0.145    | 0.257     | 0.139     | 0.118    | 0.308     | -0.096    | 0.193  |
| A020293_01 | 0.004     | 0.038     | -0.053    | 0.051     | -0.261   | -0.316    | -0.071 NA |        |
| A020294_01 | 0.136     | 0.054     | -0.064    | -0.109    | -0.058   | -0.173    | 0.101     | 0.01   |
| A020295_01 | -0.047    | -0.037    | -0.093    | -0.137    | 0.067    | 0.114     | 0.098     | 0.119  |
| A020296_01 | -0.091    | -0.111    | -0.223    | -0.058    | -0.157   | -0.097    | 0.046     | 0.131  |
| A020297_01 | 0.186     | 0.109     | 0.285     | 0.333     | 0.442    | 0.444     | -0.15     | -0.255 |
| A020298_01 | 0.085     | 0.019     | -0.195    | -0.194    | -0.071   | -0.038    | -0.009    | -0.066 |
| A020299_01 | -0.119    | 0.146     | -0.196    | -0.137    | -0.175   | -0.295    | -0.016    | 0.089  |
| A020300_01 | -0.536    | -0.396    | -0.149    | -0.118    | -1.263   | -1.212    | -0.409    | -0.232 |
| A020301_01 | -0.127    | -0.105    | -0.119    | -0.159    | 0.089    | 0.148     | 0.279     | 0.26   |
| A020303_01 | -0.295    | -0.104    | 0.008     | 0.179     | -1.06    | -1.274    | -0.066    | -0.106 |
| A020305_01 | -0.12     | 0.117     | -0.095    | -0.064    | 0.259    | 0.289     | 0.222     | 0.345  |
| A020306_01 | 0.081     | 0.139     | -0.067    | -0.25     | 0.295    | 0.561     | 0.153     | 0.205  |
| A020308_01 | 0.101     | 0.017     | -0.083    | -0.189    | -0.074   | 0.192     | -0.189    | -0.058 |
| A020309_01 | -0.093    | -0.146    | 0.007     | -0.067    | 0.472    | 0.624 NA  | NA        |        |
| A020311_01 | 0.198     | 0.069     | 0         | 0.11      | 0.165    | 0.19      | 0.208     | 0.136  |
| A020312_01 | -0.041    | -0.181    | -0.273    | -0.126    | 0.056    | 0.366     | 0.349     | 0.235  |
| A020314_01 | -1.457    | -1.444    | -2.322 NA |           | -2.504   | -2.801 NA | NA        |        |
| A020317_01 | -0.441    | -0.199    | -0.344    | -0.415    | 0.041    | 0.347     | -0.184    | 0.167  |
| A020318_01 | 0.037     | -0.001    | 0.337     | 0.043     | -0.103   | -0.24     | -0.078    | -0.236 |
| A020319_01 | -0.017    | -0.035    | -0.02     | 0.045     | 0.071    | 0.4       | -0.022    | -0.019 |
| A020320_01 | 0.045     | 0.173     | 0.118     | 0.088     | 0.105    | 0.14      | -0.037    | 0.029  |
| A020321_01 | 0.148     | 0.152     | 0.005     | -0.058    | -0.073   | -0.163    | -0.062    | -0.135 |
| A020322_01 | -0.028    | 0.062     | -0.072    | -0.008    | 0.32     | 0.193     | 0.338     | 0.192  |
| A020323_01 | -0.128    | 0.008     | -0.013    | -0.054    | -0.193   | -0.239    | -0.076    | 0.014  |
| A020324_01 | -0.123 NA |           | 0.038     | -0.012    | 0.159    | 0.084     | 0.2       | 0.322  |
| A020325_01 | 0.238 NA  | NA        |           | -0.295    | 0.278    | 0.197 NA  |           | 0.316  |
| A020326_01 | -0.353    | -0.094    | -0.113    | -0.15     | 0.285    | 0.489     | 0.103     | 0.172  |
| A020327_01 | -0.042    | 0.186     | 0.251     | -0.174    | -0.24    | -0.129    | -0.065    | 0.061  |

|            |           |           |        |           |           |           |           |        |
|------------|-----------|-----------|--------|-----------|-----------|-----------|-----------|--------|
| A020330_01 | -0.256 NA | NA        | NA     | NA        | 0.808 NA  | 0.536     |           |        |
| A020331_01 | -0.182    | 0.295     | 0.075  | -0.124    | 0.287     | -0.198    | -0.105    |        |
| A020332_01 | 0.168 NA  |           | 0.321  | 0.242 NA  | -0.026    | -0.73 NA  | NA        |        |
| A020333_01 | 0.093     | -0.153    | -0.186 | -0.056    | -0.038    | 0.026     | -0.052    | -0.096 |
| A020336_01 | 0.288 NA  |           | 0.017  | -0.102 NA | NA        |           | 0.263     | 0.048  |
| A020337_01 | 0         | -0.236    | -0.16  | -0.039    | 0.007     | 0.024     | 0.11      | -0.026 |
| A020338_01 | 0.082     | 0.122     | 0.127  | 0.094     | 0.087     | 0.166     | 0.062     | 0.061  |
| A020340_01 | -0.11     | 0.026     | -0.266 | -0.116    | -0.723    | -0.576    | -0.461    | -0.314 |
| A020341_01 | -0.133    | 0.141     | -0.109 | -0.232    | 0.214     | 0.065     | 0.089     | 0.125  |
| A020342_01 | 0.238     | 0.08      | -0.176 | -0.37     | 0.199     | 0.148     | 0.372     | 0.408  |
| A020343_01 | -0.089 NA |           | -0.141 | -0.439    | -0.359    | -0.547    | -0.05     | 0.107  |
| A020344_01 | 0.333     | 0.336     | 0.185  | 0.097     | 0.04      | 0.002     | -0.326    | -0.328 |
| A020345_01 | 0.044     | 0.293     | -0.266 | -0.365    | 0.166     | 0.19      | 0.333     | 0.574  |
| A020346_01 | -0.567    | -0.405    | 0      | -0.2      | -0.13     | 0.007     | 0.051     | 0.283  |
| A020347_01 | 0.126     | -0.103    | -0.152 | -0.311    | 0.489     | 0.479     | 0.202     | 0.072  |
| A020348_01 | 0.519     | 0.429     | -0.041 | 0.054     | 0.361     | 0.275     | 0.299     | 0.195  |
| A020349_01 | -1.096    | -0.899    | -0.067 | -0.237    | -1.039    | -1.033    | -0.061    | 0.096  |
| A020350_01 | -0.197    | 0.07      | -0.776 | -0.591    | -0.786    | -0.695    | -0.291    | -0.272 |
| A020352_01 | -0.131    | 0.172     | -0.788 | -0.685    | 0.14      | 0.226     | 0.257     | 0.246  |
| A020353_01 | -0.304    | -0.15     | -0.175 | -0.205    | 0.131     | 0.275     | 0.12      | 0.386  |
| A020356_01 | 0.283     | 0.185     | 0.057  | 0.022     | 0.237     | 0.24      | 0.129     | -0.149 |
| A020360_01 | -0.03     | -0.041    | 0.276  | 0.29      | 0.127     | 0.519     | -0.754    | -0.561 |
| A020362_01 | 0.006     | -0.12     | -0.21  | -0.406    | 0.246     | 0.153     | 0.041     | 0.012  |
| A020363_01 | 0.445     | 0.579     | -0.03  | 0.252     | -1.275    | -1.675    | -0.044    | 0.019  |
| A020364_01 | 0.362     | -0.014    | 0.196  | 0.111     | -0.16     | -0.271    | 0.22      | 0.081  |
| A020367_01 | -0.039    | 0.058     | -0.148 | -0.269    | 0.046     | 0.046     | 0.128     | 0.189  |
| A020368_01 | -0.325    | -0.351    | -0.043 | 0.166     | 0.525     | 0.915     | -0.306    | -0.327 |
| A020369_01 | -0.873    | -0.649    | -0.429 | -0.275    | -0.139    | 0.018     | -0.168    | -0.043 |
| A020370_01 | 0.058     | 0.091     | 0.337  | 0.29      | -0.476    | -1.059    | -0.269    | -0.265 |
| A020371_01 | -0.35     | -0.067    | 0.141  | 0.056     | 0.503     | 0.816     | -0.34     | -0.059 |
| A020372_01 | 0.143 NA  |           | 0.061  | -0.219    | -0.153    | -0.317    | -0.009    | 0.1    |
| A020373_01 | -0.088    | 0.002     | 0.152  | 0.295     | -0.117    | 0.065     | -0.276    | 0.115  |
| A020375_01 | -0.294    | -0.191    | -0.102 | -0.104    | -0.198    | -0.198    | -0.02     | -0.121 |
| A020376_01 | -0.11     | -0.108    | -0.114 | -0.068    | -0.026    | -0.052    | 0.019     | -0.032 |
| A020378_01 | 0.215     | 0.133     | -0.262 | -0.24     | 0.168     | 0.308     | 0.24      | 0.299  |
| A020379_01 | 0.122 NA  |           | -0.162 | -0.221 NA |           | -0.192    | 0.297     | 0.061  |
| A020380_01 | -0.085    | -0.046    | -0.309 | -0.109    | -0.188    | -0.095    | -0.098    | -0.242 |
| A020381_01 | -0.604    | -0.239    | -0.036 | 0.011     | -1.098    | -1.187    | -0.501    | -0.288 |
| A020382_01 | 0.206     | -0.159    | -0.073 | 0.127     | -0.336    | -0.166 NA | NA        |        |
| A020383_01 | -0.227    | -0.113    | 0.088  | 0.136     | -0.4      | -0.006    | -0.228 NA |        |
| A020384_01 | -0.46 NA  |           | 0.437  | 0.053     | -0.242    | -0.193    | -0.291    | -0.091 |
| A020385_01 | -0.332    | -0.212    | -0.009 | 0.119     | -0.527 NA |           | 0.019     | -0.11  |
| A020386_01 | 0.048     | 0.085     | -0.23  | -0.013    | -0.386    | -0.405    | 0.049     | -0.024 |
| A020390_01 | 0.247 NA  |           | 0.427  | 0.316     | -0.463    | -0.7 NA   |           | -0.734 |
| A020392_01 | -0.182    | -0.068    | 0.108  | 0.13      | -0.097    | -0.047    | -0.035    | -0.099 |
| A020393_01 | -0.304 NA |           | -0.399 | -0.272    | 0.034     | 0.116     | 0.131     | 0.1    |
| A020394_01 | 0.293     | 0.342     | -0.4   | -0.417    | -0.714    | -0.868    | 0.127     | 0.101  |
| A020395_01 | -0.114    | -0.237    | -0.051 | 0.101     | -0.201    | -0.092 NA | NA        |        |
| A020396_01 | -0.055    | 0.051     | -0.136 | -0.282    | 0.296     | 0.424     | -0.1      | 0.018  |
| A020399_01 | 0.005     | -0.043    | 0.326  | 0.117     | -0.131    | -0.349    | 0.119     | 0.041  |
| A020400_01 | 0.322     | 0.339     | -0.42  | -0.367    | -0.308    | -0.5      | -0.045    | -0.169 |
| A020401_01 | -0.128    | -0.27     | -0.105 | -0.139    | -0.178    | -0.055    | -0.223    | -0.116 |
| A020403_01 | 0.369     | 0.339     | 0.236  | 0.208     | 0.363     | 0.511     | -0.092    | -0.314 |
| A020404_01 | -3.952    | -2.544 NA |        | -4.088    | 0.663     | 1.41      | -2.096    | -1.984 |
| A020406_01 | -0.22     | -0.115    | -0.283 | -0.199    | -0.784    | -0.635    | -0.485    | -0.295 |
| A020410_01 | -1.212    | -0.936    | -0.463 | -0.289    | -0.732    | -0.656    | -0.498    | -0.517 |
| A020412_01 | -0.155    | -0.129    | -0.073 | -0.279    | 0.252     | 0.399     | 0.133     | 0.316  |
| A020413_01 | -0.046    | 0.144     | 0.168  | -0.02     | 0.41      | 0.26      | 0.035     | 0.016  |
| A020418_01 | 0.032     | 0.233     | 0.356  | 0.222     | 0.15      | 0.137     | -0.115    | -0.025 |
| A020419_01 | 0.258     | 0.067     | -0.058 | 0.073     | 0.291     | 0.805     | -0.214    | -0.267 |
| A020420_01 | -0.203 NA |           | 0.292  | 0.078     | 0.643     | 1.061     | 0.321     | 0.342  |
| A020421_01 | 0.237     | 0.461     | 0.626  | 0.41      | 0.377     | 0.542     | -0.181    | 0.166  |
| A020422_01 | 0.128     | 0.09      | -0.547 | -0.446    | -0.239    | -0.274    | 0.428     | 0.201  |
| A020423_01 | NA        | NA        | 0.108  | 0.198 NA  |           | -0.222 NA |           | -0.182 |
| A020424_01 | -0.12     | 0.177     | 0.104  | -0.233    | -0.215    | 0.011     | 0.097     | 0.366  |
| A020425_01 | NA        | NA        | 0.155  | 0.115 NA  |           | 0.184     | 0.019     | -0.09  |
| A020427_01 | -0.056    | 0.198     | -0.139 | -0.328    | 0.468     | 0.628     | 0.14      | 0.281  |
| A020428_01 | 0.447     | 0.423     | 0.638  | 0.598     | -0.227    | -0.578    | -0.276    | -0.487 |

|            |    |           |         |        |           |        |           |          |        |
|------------|----|-----------|---------|--------|-----------|--------|-----------|----------|--------|
| A020435_01 |    | -0.058    | -0.021  | -0.007 | -0.017    | 0.119  | 0.277     | 0.046    | 0.062  |
| A020436_01 |    | -0.542    | -0.071  | -0.423 | -0.276    | -1.105 | -1.3      | -0.17    | -0.022 |
| A020437_01 |    | 0.207     | 0.06    | 0.108  | 0.006     | 0.04   | 0.039     | 0.086    | -0.085 |
| A020438_01 |    | 0.354     | 0.022   | 0.051  | 0.021     | 0.185  | 0.308     | 0.053    | -0.127 |
| A020440_01 |    | -0.087    | -0.207  | -0.157 | -0.166    | -0.941 | -0.941    | -0.119   | 0.096  |
| A020441_01 |    | -0.11     | 0.191   | -0.234 | -0.415    | -0.025 | 0.122     | -0.013   | 0.384  |
| A020442_01 |    | -0.118    | -0.108  | 0.004  | 0.179     | -0.194 | -0.065    | 0.128    | -0.089 |
| A020443_01 |    | -0.012    | -0.055  | -0.228 | -0.264    | -0.242 | -0.324    | 0.311    | 0.219  |
| A020444_01 |    | 0.158 NA  |         | -0.042 | -0.187    | 0.016  | -0.061    | 0.04     | -0.008 |
| A020445_01 |    | 0.133     | 0.184   | -0.035 | -0.142    | -0.163 | -0.118    | -0.007   | -0.017 |
| A020446_01 |    | 0.12      | 0.152   | 0.121  | -0.159    | 0.247  | 0.19      | -0.042   | -0.027 |
| A020452_01 |    | -0.682    | -0.493  | 0.162  | 0.308     | -1.297 | -1.378    | -1.093   | -0.96  |
| A020455_01 |    | -0.228    | -0.134  | 0.088  | 0.103     | -0.122 | -0.098    | 0.027    | 0.022  |
| A020460_01 |    | 0.369     | 0.45 NA | NA     |           | -0.081 | -0.017 NA | NA       |        |
| A020461_01 |    | 0.27      | 0.181   | -0.406 | -0.21     | -0.071 | -0.063    | 0.111    | -0.015 |
| A020464_01 |    | -0.096    | -0.041  | -0.108 | -0.078    | 0.056  | 0.276     | -0.216   | -0.032 |
| A020467_01 |    | 0.05      | 0.004   | 0.056  | 0.109     | -0.297 | -0.187    | -0.29    | -0.173 |
| A020470_01 |    | -0.279    | -0.271  | 0.102  | 0.258     | -0.529 | -0.482    | 0        | 0.054  |
| A020471_01 |    | -0.164 NA |         | 0.408  | 0.221 NA  | NA     |           | -0.042   | -0.137 |
| A020472_01 |    | 0.357     | 0.272   | 0.124  | 0.036     | -0.307 | -0.412    | -0.065   | -0.078 |
| A020474_01 |    | 0.2       | -0.004  | 0.158  | 0.045     | 0.161  | 0.128     | 0.217    | 0.126  |
| A020477_01 |    | 0.313     | 0.041   | 0.073  | -0.233 NA |        | -0.193    | 0.278    | -0.019 |
| A020478_01 |    | -0.057 NA |         | 0.008  | 0.004     | -0.24  | -0.236 NA | NA       |        |
| A020480_01 |    | 0.204 NA  |         | 0.084  | 0.117     | 0.115  | 0.225     | -0.076   | -0.287 |
| A020481_01 |    | -0.271 NA |         | -0.073 | -0.088    | -0.448 | -0.474    | 0.026    | 0.092  |
| A020482_01 |    | 0.362     | 0.303   | 0.145  | 0.506     | -0.098 | 0.088     | -0.454   | -0.43  |
| A020484_01 | NA | NA        |         | 0.144  | 0.216 NA  |        | -1.04     | 0.018 NA |        |
| A020486_01 |    | 0.051     | -0.069  | -0.084 | -0.354    | 0.258  | 0.393     | -0.061   | 0.003  |
| A020488_01 |    | 0.246 NA  |         | 0.144  | 0.192 NA  |        | -0.1      | 0.094    | 0.134  |
| A020489_01 |    | -0.118    | 0.069   | -0.422 | -0.362    | -0.093 | 0.072     | 0.016    | 0.029  |
| A020490_01 |    | -0.3 NA   |         | -0.176 | -0.341 NA |        | -0.608    | 0.049    | -0.031 |
| A020491_01 |    | 0.129 NA  |         | 0.091  | -0.031    | 0.289  | 0.24      | 0.417    | 0.265  |
| A020493_01 |    | 0.135     | -0.014  | -0.205 | -0.277    | 0.163  | 0.044     | 0.205    | 0.096  |
| A020497_01 |    | 0.157     | 0.263   | -0.173 | -0.201    | 0.186  | 0.122     | 0.369    | 0.361  |
| A020498_01 |    | -0.204    | -0.005  | -0.149 | 0.006     | 0.01   | 0.19      | 0.036    | 0.177  |
| A020500_01 |    | -0.133    | -0.296  | -0.29  | -0.17     | 0.035  | 0.444     | 0.078    | 0.249  |
| A020501_01 |    | 0.128     | 0.275   | -0.594 | -0.71     | -1.86  | -2.288    | -1.278   | -1.501 |
| A020502_01 |    | 0.092     | -0.052  | -0.137 | -0.145    | -0.111 | -0.023 NA | NA       |        |
| A020504_01 |    | 0.146     | 0.274   | 0.184  | 0.051     | 0.12   | 0.162     | -0.118   | -0.055 |
| A020505_01 |    | 0.133 NA  |         | -0.072 | -0.007 NA |        | -0.036 NA |          | -0.205 |
| A020506_01 |    | -0.098    | -0.013  | -0.294 | -0.21     | 0.051  | 0.185     | 0.008    | 0.014  |
| A020507_01 |    | 0.206     | 0.079   | -0.082 | -0.268    | -0.041 | 0.038     | 0.078    | 0.126  |
| A020509_01 |    | -0.279    | 0.003   | 0.166  | 0.05      | 0.276  | 0.582     | -0.057   | 0.128  |
| A020510_01 |    | 0.161     | -0.12   | -0.334 | -0.46     | 0.158  | 0.094     | 0.231    | -0.023 |
| A020511_01 |    | 0.277     | -0.055  | -0.14  | -0.199    | -0.28  | -0.325    | 0.157    | 0.221  |
| A020512_01 |    | 0.202     | 0.172   | 0.173  | 0.141     | -0.19  | -0.036 NA |          | -0.337 |
| A020514_01 |    | -0.02     | -0.138  | -0.053 | -0.044    | -0.01  | 0.184     | -0.178   | -0.197 |
| A020515_01 |    | 0.135     | 0.148   | -0.113 | 0.042     | -0.289 | -0.114    | -0.178   | -0.406 |
| A020516_01 |    | -0.865    | -0.657  | -0.058 | -0.02     | -1.162 | -1.136    | 0.045    | 0.268  |
| A020520_01 |    | 0.137     | -0.027  | 0.15   | 0.325     | -0.193 | 0.041     | 0.105    | 0.006  |
| A020521_01 |    | -0.192    | 0.2     | 0.052  | 0.021     | 0.142  | 0.185     | 0.059    | 0.012  |
| A020522_01 |    | 0.263     | 0.07    | 0.221  | 0.027     | 0.202  | 0.018     | 0.13     | 0.016  |
| A020523_01 | NA | NA        | NA      |        | -0.135 NA | NA     |           | 0.283 NA |        |
| A020524_01 |    | 0.031     | -0.18   | -0.884 | -1.246    | -1.362 | -1.41 NA  | NA       |        |
| A020529_01 |    | 0.123     | 0.38 NA |        | -0.066    | 0.43   | 0.511     | 0.02     | 0.105  |
| A020530_01 |    | 0.762     | 0.548   | 0.128  | -0.048    | 0.568  | 0.538     | 0.204    | 0.127  |
| A020533_01 |    | 0.285     | 0.147   | -0.037 | 0.041     | -0.064 | -0.154    | -0.003   | -0.252 |
| A020534_01 |    | 0.062     | 0.127   | 0.194  | 0.308     | -0.102 | -0.149    | 0.104    | 0.099  |
| A020535_01 |    | 0.011     | 0.114   | 0.298  | 0.4       | -0.034 | -0.06     | 0.059    | -0.056 |
| A020537_01 | NA | NA        |         | -0.015 | 0.171 NA  |        | -0.802    | 0.007    | -0.301 |
| A020541_01 |    | -0.256    | -0.336  | 0.001  | -0.129    | 0.024  | 0.099     | -0.458   | -0.388 |
| A020542_01 |    | 0.185 NA  |         | 0.104  | 0.098 NA  |        | -0.373    | 0.034    | -0.139 |
| A020543_01 |    | 0.268     | 0.494   | -0.263 | -0.324    | 0.691  | 0.762 NA  | NA       |        |
| A020544_01 |    | 0.132 NA  |         | 0.206  | 0.103 NA  |        | -0.176    | 0.173    | -0.129 |
| A020546_01 |    | 0.288     | -0.144  | 0.182  | -0.033    | -0.023 | -0.109    | 0.06     | -0.352 |
| A020547_01 |    | 0.034     | -0.13   | 0.123  | 0.155     | -0.009 | -0.078    | -0.013   | -0.157 |
| A020549_01 |    | -0.017    | -0.163  | -0.51  | -0.617    | 0.073  | 0.057     | 0.116    | -0.194 |
| A020550_01 |    | -0.237    | -0.013  | 0.013  | -0.003    | -0.906 | -1.104    | -0.316   | -0.224 |

|            |           |        |         |           |        |           |           |        |
|------------|-----------|--------|---------|-----------|--------|-----------|-----------|--------|
| A020551_01 | 0.125     | 0.028  | 0.027   | 0.038     | -0.098 | -0.058    | 0.076     | -0.327 |
| A020553_01 | -0.658    | -0.721 | -0.163  | -0.323    | -0.248 | -0.108    | -0.091    | 0.116  |
| A020554_01 | -0.065    | -0.042 | 0.216   | 0.155     | 0.152  | 0.177     | 0.016     | -0.131 |
| A020556_01 | -1.171    | -0.775 | -1.654  | -1.335    | -0.591 | -0.714    | -0.751    | -1.138 |
| A020557_01 | 0.124 NA  |        | -0.48   | -0.477 NA |        | -0.807    | -0.147    | -0.245 |
| A020559_01 | -1.194    | -0.843 | -0.659  | -0.675    | -0.93  | -1.164    | -0.811    | -0.823 |
| A020560_01 | -0.937    | -0.426 | -0.252  | -0.178    | -3.927 | -4.804    | -0.579    | -0.488 |
| A020562_01 | -0.076    | -0.22  | -0.187  | -0.334    | -0.131 | -0.121    | 0.134     | 0.209  |
| A020563_01 | 0.009     | 0.222  | -0.01   | 0.03      | -0.126 | -0.126    | 0.052     | 0.244  |
| A020564_01 | 0.508     | 0.135  | 0.055   | -0.047    | 0.182  | 0.175     | 0.192     | -0.109 |
| A020565_01 | 0.252     | 0.398  | 0.15    | 0.122     | -0.024 | -0.142    | -0.145    | 0.06   |
| A020570_01 | 0.425     | 0.132  | 0.101   | 0.127     | 0.176  | -0.167    | 0.128     | -0.237 |
| A020571_01 | -0.173    | -0.16  | 0.189   | 0.13      | 0.004  | 0.088     | -0.005    | 0.037  |
| A020572_01 | 0.232     | 0.233  | 0.419   | 0.235 NA  |        | -0.358 NA | NA        |        |
| A020573_01 | -0.608    | -0.373 | -0.016  | -0.066    | 0.103  | 0.363     | -0.148    | -0.005 |
| A020575_01 | 0.329     | 0.196  | 0.023   | 0.054     | 0.061  | 0.145     | 0.253     | 0.242  |
| A020576_01 | -0.097    | -0.175 | -0.152  | -0.1      | -0.007 | 0.086     | 0.094     | 0.089  |
| A020577_01 | 0.294     | 0.243  | 0.203   | 0.019     | 0.074  | -0.04     | -0.097    | -0.037 |
| A020578_01 | -0.26     | -0.213 | -0.072  | -0.021    | -0.056 | -0.19     | 0.041     | 0.031  |
| A020579_01 | 0.235 NA  |        | 0.35 NA | NA        |        | -0.336 NA | NA        |        |
| A020580_01 | 0.3       | 0.4    | 0.185   | 0.311     | 0.221  | 0.347     | 0.064     | 0.031  |
| A020581_01 | 0.276 NA  |        | 0.192   | -0.011 NA | NA     | NA        | NA        |        |
| A020584_01 | -0.229    | -0.11  | 0.082   | 0.042     | 0.139  | 0.283     | 0.069     | 0.117  |
| A020585_01 | 0.051     | 0.021  | -0.24   | -0.232    | 0.017  | -0.097    | 0.294     | 0.053  |
| A020586_01 | -0.052    | -0.021 | -0.289  | -0.211    | 0.038  | 0.046     | -0.012    | -0.004 |
| A020587_01 | 0.107 NA  |        | -0.023  | 0.003     | -0.008 | -0.085 NA |           | 0.147  |
| A020588_01 | 0.269     | 0.536  | 0.055   | -0.121    | 0.541  | 0.558     | 0.162     | 0.427  |
| A020589_01 | 0.088     | 0.191  | -0.44   | -0.489    | 0.141  | 0.283     | 0.055     | 0.16   |
| A020590_01 | 0.506     | 0.604  | 0.675   | 0.434     | 0.065  | -0.052    | -0.07     | -0.179 |
| A020592_01 | 0.011     | 0.028  | -0.506  | -0.262    | -1.083 | -1.315    | -0.311    | -0.314 |
| A020593_01 | -0.15 NA  |        | -0.075  | -0.166    | -0.232 | -0.373    | 0.035     | -0.047 |
| A020594_01 | 0.188     | 0.056  | 0.929   | 0.934     | 0.82   | 1.018     | -0.229    | -0.378 |
| A020595_01 | 0.163     | 0.124  | -0.077  | -0.227 NA | NA     | NA        | NA        |        |
| A020599_01 | -0.882    | -0.844 | -0.344  | -0.494    | -0.47  | -0.523    | -0.046    | -0.044 |
| A020600_01 | -0.361    | -0.298 | 0.287   | 0.363     | 0.002  | 0.073     | -0.25     | -0.186 |
| A020601_01 | -0.008    | 0.034  | -0.084  | -0.193    | 0.092  | -0.032    | -0.365    | -0.772 |
| A020602_01 | 0.261     | 0.255  | 0.063   | -0.073    | 0.447  | 0.327     | 0.02      | -0.109 |
| A020603_01 | 0.231     | 0.545  | 0.006   | 0.017     | 0.571  | 0.779     | -0.418    | -0.225 |
| A020604_01 | -0.144 NA |        | -0.409  | -0.371    | -0.299 | -0.363    | 0.098     | -0.003 |
| A020605_01 | -0.931    | -0.527 | 0.432   | 0.345     | -0.324 | 0.052     | 0.031     | 0.125  |
| A020606_01 | 0.145     | 0.328  | 0.168   | 0.265     | -0.687 | -0.96     | -0.162    | -0.299 |
| A020608_01 | 0.16      | 0.041  | 0.004   | -0.124    | 0.191  | 0.221     | 0.072     | -0.006 |
| A020610_01 | -0.058    | 0.04   | -0.076  | 0.164     | -0.167 | 0.013     | -0.009    | -0.078 |
| A020611_01 | 0.22      | -0.093 | 0.016   | -0.024    | 0.193  | 0.149 NA  |           | -0.191 |
| A020612_01 | 0.167     | 0.147  | 0.099   | -0.137    | 0.027  | 0.02      | 0.088     | -0.044 |
| A020613_01 | 0.235     | 0.074  | -0.005  | -0.096    | 0.484  | 0.63      | 0.046     | -0.089 |
| A020615_01 | 0.951     | 0.96   | 0.268   | 0.166 NA  |        | 0.361     | 0.259     | 0.295  |
| A020616_01 | -0.505    | -0.436 | -0.47   | -0.456    | -0.3   | -0.216    | -0.005    | 0.177  |
| A020617_01 | -0.233    | 0.016  | -0.359  | -0.27     | -0.323 | -0.132    | 0.005     | 0.11   |
| A020619_01 | 0.224     | 0.117  | 0.244   | -0.1      | 0.357  | 0.285     | -0.031    | -0.077 |
| A020620_01 | 0.328     | 0.328  | 0.229   | 0.244     | -0.054 | -0.246    | -0.117    | -0.115 |
| A020621_01 | 0.153     | 0.218  | 0.355   | 0.291     | -0.391 | -0.64     | 0.025     | 0.085  |
| A020622_01 | 0.052     | -0.018 | -0.019  | -0.095    | 0.149  | -0.04     | 0.127     | -0.021 |
| A020623_01 | -0.194    | 0.007  | 0.068   | 0.007     | -0.16  | -0.052    | -0.228    | -0.127 |
| A020625_01 | 0.017     | 0.029  | 0.268   | 0.293     | -0.352 | -0.376    | -0.337 NA |        |
| A020627_01 | -0.314 NA |        | -0.078  | -0.012    | -0.189 | -0.414    | 0.322     | 0.187  |
| A020629_01 | 0.364     | 0.354  | 0.054   | 0.033     | 0.044  | -0.033    | -0.198    | -0.242 |
| A020630_01 | 0.202 NA  |        | 0.125   | 0.141 NA  |        | -1.137    | 0.374     | 0.234  |
| A020633_01 | 0.549     | 0.578  | -0.335  | -0.262    | 0.091  | 0.192     | -0.422    | 0.019  |
| A020638_01 | NA        | 0.164  | 0.319   | 0.013 NA  |        | -1.458    | -0.025    | -0.01  |
| A020639_01 | 0.25 NA   |        | 0.297   | -0.207 NA | NA     | NA        |           | -0.159 |
| A020640_01 | 0.374     | 0.331  | 0.336   | 0.093     | 0.457  | 0.291     | 0.062     | -0.005 |
| A020641_01 | -0.025    | 0.022  | 0.032   | -0.155    | 0.043  | -0.056    | 0.158     | 0.056  |
| A020643_01 | -0.861 NA |        | 0.038   | 0.082 NA  |        | -0.153    | -0.004    | -0.296 |
| A020645_01 | 0.222     | 0.358  | 0.018   | -0.117    | 0.347  | 0.245     | 0.107     | 0.177  |
| A020646_01 | 0.161     | 0.098  | 0.109   | 0.057     | 0.135  | 0.129     | -0.185    | -0.389 |
| A020647_01 | 0.405 NA  |        | 0.461   | 0.361 NA  | NA     |           | 0.022     | -0.253 |
| A020649_01 | 0.058     | 0.006  | -0.034  | 0.201     | -0.086 | 0.018     | -0.033    | -0.054 |

|            |           |           |          |           |        |           |          |        |
|------------|-----------|-----------|----------|-----------|--------|-----------|----------|--------|
| A020650_01 | 0.148     | 0.347     | 0.102    | 0.223 NA  |        | -1.146    | 0.057    | -0.092 |
| A020652_01 | -0.209    | -0.212    | 0.009    | 0.195     | -0.049 | -0.059    | 0.068    | 0.01   |
| A020653_01 | 0.311 NA  |           | 0.002    | -0.051 NA | NA     |           | -0.071   | -0.18  |
| A020654_01 | -0.152    | -0.016    | 0.256 NA |           | 0.245  | 0.372     | -0.103   | -0.05  |
| A020656_01 | -0.021    | -0.001    | 0.142    | 0.324     | -0.733 | -0.842    | -0.583   | -0.681 |
| A020658_01 | -0.065    | -0.309 NA |          | -0.232    | -0.184 | -0.43     | 0.079    | -0.118 |
| A020659_01 | -0.486 NA |           | 0.117    | -0.065 NA | NA     |           | 0.035    | 0.054  |
| A020660_01 | -0.291    | -0.006    | -0.23    | -0.123    | -0.043 | 0.21      | -0.103   | 0.048  |
| A020661_01 | 0.119     | 0.101     | -0.225   | -0.268    | -0.388 | -0.576    | 0.006 NA |        |
| A020663_01 | -0.088 NA |           | 0.015    | 0.018     | 0.501  | 0.471     | 0.147    | -0.003 |
| A020664_01 | -0.239    | -0.053    | -0.009   | -0.234    | -0.238 | -0.06     | -0.169   | -0.047 |
| A020665_01 | 0.002     | -0.122    | 0.465    | 0.464     | 0.644  | 0.522     | 0.264    | 0.025  |
| A020668_01 | 0.111     | -0.015    | -0.122   | 0.026     | -0.077 | -0.074    | 0.084    | -0.003 |
| A020670_01 | 0.221     | 0.083     | -0.061   | -0.14     | -0.075 | -0.398    | 0.048    | -0.01  |
| A020671_01 | 0.446     | 0.138     | -0.105   | -0.185    | 0.357  | 0.426     | 0.114    | 0.101  |
| A020673_01 | 0.256     | -0.009    | 0.003    | 0.03      | -0.086 | -0.364    | 0.239    | 0.004  |
| A020678_01 | 0.145     | -0.06     | -0.197   | -0.15     | -0.011 | -0.143    | -0.012   | -0.236 |
| A020683_01 | 0.142     | -0.142    | -0.164   | -0.174    | 0.083  | 0.133     | 0.086    | -0.092 |
| A020684_01 | -0.196    | -0.005    | 0.024    | -0.258    | 0.123  | 0.423     | -0.031   | 0.457  |
| A020686_01 | NA        | 0.36      | 0.354    | 0.109 NA  |        | -0.25     | -0.313   | -0.5   |
| A020689_01 | -0.354    | -0.305    | -0.146   | -0.161    | -1.758 | -1.953    | -0.791   | -0.826 |
| A020690_01 | 0.349     | 0.114     | -0.277   | -0.329    | 0.071  | 0.16      | 0.438    | 0.218  |
| A020691_01 | 0.231     | 0.098     | 0.22     | 0.213     | 0.042  | -0.218    | -0.001   | -0.235 |
| A020692_01 | -0.001    | 0.13      | -0.086   | -0.137    | -0.024 | 0.104     | 0.131 NA |        |
| A020694_01 | NA        | NA        | 0.402    | 0.115 NA  | NA     |           | 0.395    | 0.262  |
| A020696_01 | 0.18      | 0.08      | 0.403    | 0.252 NA  |        | 0.194     | 0.243    | -0.093 |
| A020697_01 | -0.516    | -0.508    | -0.313   | 0.001     | -0.651 | -0.632    | 0.018    | -0.052 |
| A020699_01 | -0.277    | 0.062     | 0.196    | -0.035    | 0.123  | 0.321     | -0.21    | 0.06   |
| A020702_01 | 0.27      | 0.67      | 0.6      | 0.431     | 0.471  | 0.561     | -0.198   | -0.081 |
| A020703_01 | -0.255    | -0.149    | -0.035   | -0.018    | 0.202  | 0.392     | -0.012   | 0.313  |
| A020704_01 | -0.445    | -0.126    | 0.512    | 0.344     | 0.009  | 0.049     | -0.508   | -0.426 |
| A020705_01 | 0.209     | 0.209     | 0.23     | 0.129     | -0.014 | -0.094    | -0.073   | -0.179 |
| A020707_01 | 0.058     | -0.025    | 0.095    | 0.146     | -0.031 | -0.123 NA |          | -0.168 |
| A020708_01 | -0.126    | -0.037    | 0.004    | 0.119     | 0.258  | 0.582     | 0.177    | 0.223  |
| A020710_01 | -0.096    | 0.067     | -0.194   | -0.031    | 0.578  | 0.858     | 0.204    | 0.389  |
| A020713_01 | 0.167 NA  |           | -0.109   | -0.178 NA | NA     |           | 0.371    | 0.069  |
| A020714_01 | -0.131    | 0.051     | -0.154   | -0.335    | 0.194  | 0.221 NA  | NA       |        |
| A020716_01 | 0.223     | -0.032    | -0.186   | -0.008    | -0.168 | -0.096    | 0.319    | 0.08   |
| A020722_01 | 0.042 NA  |           | -0.082   | -0.126 NA | NA     |           | 0.303    | -0.043 |
| A020725_01 | -0.275    | -0.053    | -0.313   | -0.405    | -0.237 | -0.081    | 0.101    | 0.344  |
| A020727_01 | -0.609    | -0.383    | 0.367    | 0.235     | -0.099 | -0.104    | -0.303   | -0.61  |
| A020728_01 | -0.167    | -0.102    | 0.009    | -0.08     | -0.356 | -0.552    | -0.096   | -0.194 |
| A020730_01 | -1.673    | -1.559    | -0.612   | -0.556    | -1.495 | -1.592 NA |          | -0.666 |
| A020731_01 | 0.416     | 0.619     | -0.22    | -0.081    | -0.309 | -0.517    | -0.244   | -0.234 |
| A020732_01 | -0.481    | -0.562    | 0.068    | -0.138    | -0.344 | -0.307    | -0.283   | -0.154 |
| A020733_01 | -0.574    | -0.617    | -0.193   | -0.194    | -0.703 | -0.627    | -0.53    | -0.505 |
| A020734_01 | -0.874    | -0.689    | -1.448   | -1.523    | -1.21  | -1.111    | -0.965   | -0.932 |
| A020735_01 | -0.479    | -0.285    | 0.257    | 0.135     | -0.49  | -0.648    | -0.084   | -0.174 |
| A020737_01 | 0.467     | 0.517     | -0.134   | -0.185    | 0.016  | 0.036     | 0.066    | 0.058  |
| A020738_01 | 0.096     | 0.095     | -0.211   | -0.276    | -0.187 | -0.158    | 0.068    | 0.006  |
| A020740_01 | 0.067     | -0.042    | 0.117    | 0.23      | 0.06   | 0.204     | -0.141   | -0.321 |
| A020741_01 | 0.278     | 0.164     | -0.425   | -0.307    | 0.229  | 0.154     | 0.224    | -0.044 |
| A020746_01 | 0.023     | -0.03     | -0.217   | -0.025    | 0.265  | 0.521     | 0.084    | -0.017 |
| A020748_01 | 0.372     | 0.363     | -0.095   | 0.031     | -0.661 | -0.856    | 0.056    | 0.082  |
| A020750_01 | 0.184     | 0.062     | -0.252   | -0.317    | -0.148 | -0.218    | -0.036   | -0.136 |
| A020751_01 | 0.08      | 0.462     | -0.246   | -0.545    | 0.276  | 0.375     | -0.09    | 0.291  |
| A020754_01 | -0.104    | -0.282    | 0.161    | -0.088    | 0.025  | -0.174    | -0.062   | -0.356 |
| A020756_01 | 0.018     | -0.124    | -0.193   | -0.032    | 0.012  | -0.007    | 0.056    | -0.011 |
| A020757_01 | 0.02      | 0.12      | -0.217   | -0.109    | 0.147  | 0.308     | 0.111    | -0.068 |
| A020759_01 | 0.197     | 0.115     | -0.133   | -0.076    | -0.109 | -0.15     | -0.021   | -0.075 |
| A020760_01 | -0.408    | -0.296    | -1.324   | -1.042    | 0.251  | 0.367     | -0.076   | -0.259 |
| A020761_01 | 0.336     | 0.357     | 0.008    | 0.046     | 0.295  | 0.359     | 0        | 0.1    |
| A020762_01 | -0.124    | -0.268    | -0.014   | 0.021     | -1.009 | -1.199    | 0.266 NA |        |
| A020763_01 | -0.24     | 0.14      | 0.218    | 0.341     | -0.036 | -0.028    | -0.267   | -0.226 |
| A020765_01 | 0.025     | -0.005    | -0.192   | -0.191    | 0.184  | 0.279     | 0.264    | -0.09  |
| A020766_01 | -0.037    | -0.028    | -0.305   | -0.276    | -0.39  | -0.213    | -0.178   | 0.024  |
| A020767_01 | -0.171    | -0.229    | 0.027    | 0.135     | 0.238  | 0.329     | 0.28     | 0.11   |
| A020769_01 | 0.185     | 0.241     | 0.091    | 0.077     | -0.029 | -0.089 NA | NA       |        |

|            |           |        |        |          |        |           |        |        |
|------------|-----------|--------|--------|----------|--------|-----------|--------|--------|
| A020771_01 | 0.044     | 0.154  | -0.193 | -0.131   | 0.13   | 0.278     | 0.012  | 0.02   |
| A020774_01 | -0.184    | -0.12  | 0.115  | -0.085   | 0.248  | 0.157     | 0.264  | 0.24   |
| A020777_01 | 0.278 NA  |        | 0.597  | 0.697    | -0.696 | -0.97 NA  |        | -0.774 |
| A020778_01 | 0.044     | -0.055 | 0.019  | 0.166    | 0.112  | 0.103     | 0.114  | 0.105  |
| A020780_01 | -0.113    | 0.111  | -0.276 | 0.221    | -0.095 | 0.142     | -0.097 | 0.36   |
| A020781_01 | 0.144     | 0.068  | -0.14  | -0.211   | -0.257 | -0.312    | 0.002  | -0.092 |
| A020784_01 | 0.454     | 0.344  | -0.26  | -0.529   | 0.624  | 0.561     | -0.016 | -0.13  |
| A020785_01 | 0.326     | 0.157  | -0.11  | -0.302   | 0.097  | 0.088     | -0.077 | 0.191  |
| A020788_01 | 0.276     | 0.536  | -0.592 | -0.727   | -0.902 | -1.144    | -1.44  | -1.551 |
| A020795_01 | 0.412     | 0.72   | 0.032  | 0.119    | 0.373  | 0.555     | -0.099 | 0.036  |
| A020796_01 | -0.117    | -0.106 | 0.49   | 0.242    | 0.535  | 0.594     | 0.143  | 0.022  |
| A020797_01 | 0.048     | 0.297  | -0.013 | 0.096    | -0.924 | -0.944    | -0.368 | -0.056 |
| A020798_01 | -0.539    | -0.576 | 0.025  | 0.166    | -0.116 | 0.189     | -0.582 | -0.867 |
| A020799_01 | 0.155     | -0.024 | 0.019  | 0.007    | -0.049 | -0.055    | 0.14   | -0.012 |
| A020800_01 | 0.281     | 0.008  | 0.043  | 0.039    | -0.291 | -0.381    | -0.055 | -0.32  |
| A020802_01 | -0.21     | -0.221 | -0.168 | 0.047    | -0.016 | 0.141     | 0.023  | 0.026  |
| A020803_01 | 0.683     | 0.632  | 0.246  | 0.404    | 0.04   | 0.114     | 0.2    | 0.089  |
| A020806_01 | 0.179     | 0.252  | 0.177  | 0.389    | -0.277 | -0.008    | 0.321  | 0.293  |
| A020807_01 | 0.057     | 0.142  | 0.108  | 0.263    | 0.102  | 0.22      | -0.179 | -0.068 |
| A020809_01 | 0.223     | -0.021 | -0.246 | -0.15    | 0.143  | 0.072     | 0.203  | -0.083 |
| A020811_01 | 0.109     | -0.281 | -0.204 | -0.317   | 0.577  | 0.62      | 0.377  | 0.199  |
| A020813_01 | -0.48 NA  |        | 0.379  | 0.118 NA | NA     |           | -0.299 | -0.197 |
| A020816_01 | 0.321     | 0.13   | 0.152  | 0.098    | 0.393  | 0.308     | 0.086  | -0.16  |
| A020817_01 | -0.29     | -0.302 | 0.226  | -0.169   | -0.255 | -0.133    | -0.136 | -0.031 |
| A020818_01 | -0.075    | -0.022 | 0.024  | -0.11    | 0.161  | 0.108     | 0.078  | -0.002 |
| A020819_01 | -0.026    | 0.063  | -0.125 | 0.202    | 0.236  | 0.435     | 0.077  | 0.187  |
| A020820_01 | -0.431    | -0.287 | 0.105  | -0.006   | 0.116  | 0.045     | -0.006 | -0.02  |
| A020821_01 | 0.163     | -0.051 | -0.098 | -0.247   | -0.042 | -0.019    | 0.139  | -0.137 |
| A020823_01 | 0.209     | 0.347  | 0.1    | 0.144    | 0.278  | 0.131     | -0.028 | -0.084 |
| A020825_01 | -0.118    | -0.286 | -0.311 | -0.339   | -0.3   | -0.73     | 0.396  | 0.098  |
| A020826_01 | 0.163     | 0.252  | -0.521 | -0.434   | 0.278  | 0.339     | 0.253  | 0.323  |
| A020827_01 | 0.144 NA  |        | -0.09  | -0.08    | 0.132  | 0.166 NA  | NA     |        |
| A020828_01 | 0.363     | 0.305  | -0.248 | -0.257   | 0.09   | 0.276     | -0.042 | -0.237 |
| A020831_01 | -0.022    | -0.122 | 0.156  | -0.124   | 0.274  | 0.272     | 0.037  | 0.014  |
| A020835_01 | -0.826    | -0.514 | -0.041 | 0.093    | -0.871 | -0.819    | 0.039  | 0.184  |
| A020836_01 | -0.245    | -0.215 | 0.231  | 0.11     | -0.353 | -0.321    | -0.135 | -0.212 |
| A020838_01 | 0.069     | 0.09   | -0.039 | 0.072    | 0.048  | 0.002     | 0.067  | 0.097  |
| A020839_01 | -0.139    | 0.053  | -0.019 | -0.249   | 0.232  | 0.275     | 0.015  | 0.136  |
| A020841_01 | 0.15      | 0.405  | 0.235  | 0.044    | 0.132  | 0.224     | -0.13  | 0.202  |
| A020842_01 | -0.387    | -0.206 | -0.041 | -0.164   | -0.93  | -0.846    | -0.393 | -0.156 |
| A020843_01 | -0.209 NA |        | 0.099  | -0.104   | -0.475 | -0.639    | -0.31  | -0.442 |
| A020844_01 | 0.111     | 0.152  | -0.176 | -0.074   | -0.001 | -0.174    | 0.017  | -0.225 |
| A020845_01 | 0.167     | 0.187  | -0.377 | -0.052   | -0.25  | -0.325    | 0.154  | 0.049  |
| A020847_01 | 0.169     | 0.302  | -0.762 | -0.849   | 0.331  | 0.201     | 0.082  | 0.2    |
| A020849_01 | -0.144    | -0.209 | -0.183 | -0.122   | -0.046 | -0.029    | 0.138  | 0.122  |
| A020850_01 | 0.013     | -0.1   | 0.039  | 0.085    | -0.229 | -0.087    | -0.458 | -0.277 |
| A020852_01 | -0.344    | -0.202 | -0.026 | -0.229   | -0.969 | -1.263    | -0.113 | -0.188 |
| A020853_01 | -0.094    | 0.167  | -0.134 | -0.345   | -0.052 | 0.095     | -0.141 | 0.066  |
| A020854_01 | 0.386 NA  |        | -0.03  | -0.016   | -0.496 | -0.78 NA  | NA     |        |
| A020855_01 | -0.495    | 0.022  | -0.003 | 0.02     | 0.446  | 0.989     | 0.018  | 0.389  |
| A020860_01 | 0.332     | 0.093  | 0.046  | -0.21    | 0.32   | -0.06     | 0.233  | -0.084 |
| A020861_01 | -0.306    | -0.239 | -0.363 | -0.398   | -0.238 | -0.053    | -0.205 | -0.107 |
| A020863_01 | 0.291     | 0.24   | 0.211  | 0.393    | 0.169  | 0.239     | -0.148 | -0.334 |
| A020866_01 | 0.207 NA  |        | 0.643  | 0.425    | -0.799 | -1.282 NA |        | -0.545 |
| A020868_01 | 0.058     | 0.207  | -0.304 | -0.191   | 0.089  | -0.074    | 0.054  | 0.034  |
| A020869_01 | 0.019     | 0.062  | -0.827 | -0.608   | -0.162 | -0.246    | 0.199  | 0.116  |
| A020870_01 | -0.726    | -0.754 | 0.722  | 0.761    | 0.481  | 0.737     | 0.267  | 0.367  |
| A020871_01 | -0.034    | 0.024  | 0.023  | -0.043   | -0.082 | 0.151     | -0.053 | 0.077  |
| A020872_01 | -0.111    | -0.407 | -0.119 | -0.219   | 0.177  | 0.021     | 0.186  | -0.166 |
| A020873_01 | 0.472     | 0.336  | 0.199  | 0.318    | -0.003 | -0.117    | -0.265 | -0.425 |
| A020876_01 | 0.085     | 0.001  | -0.015 | 0.029    | 0.178  | 0.248     | 0.096  | -0.122 |
| A020879_01 | -0.083    | -0.001 | -0.065 | -0.009   | 0.087  | 0.246     | 0.244  | 0.257  |
| A020880_01 | -0.893    | -0.824 | 0.825  | 0.929    | 1.133  | 1.755     | 0.26   | 0.392  |
| A020881_01 | -0.049    | 0.032  | -0.141 | -0.21    | 0.254  | 0.462     | 0.181  | 0.245  |
| A020882_01 | -0.167    | -0.037 | 0.128  | 0.1      | 0.049  | 0.122     | -0.271 | -0.163 |
| A020883_01 | -0.322 NA |        | -0.115 | 0.007    | -0.178 | -0.11     | 0.147  | 0.139  |
| A020889_01 | 0.178     | 0.506  | -0.366 | -0.539   | 0.016  | 0.272     | 0.14   | 0.608  |
| A020892_01 | 0.02      | 0.424  | 0.162  | 0.264    | 0.18   | 0.424     | -0.128 | 0.052  |

|            |    |        |        |        |        |        |        |        |        |
|------------|----|--------|--------|--------|--------|--------|--------|--------|--------|
| A020900_01 |    | 0.133  | 0.066  | 0.041  | 0.09   | -0.048 | -0.095 | -0.261 | -0.209 |
| A020902_01 |    | 0.719  | 0.638  | 0.494  | 0.579  | 0.432  | 0.596  | 0.079  | -0.03  |
| A020905_01 |    | -1.246 | -0.965 | -0.891 | -0.984 | -0.644 | -0.52  | -0.496 | NA     |
| A020906_01 |    | 0.232  | 0.106  | 0.012  | -0.182 | -0.288 | -0.376 | 0.047  | -0.07  |
| A020910_01 |    | -0.329 | -0.47  | -0.165 | -0.178 | -0.856 | -0.872 | -0.521 | -0.643 |
| A020916_01 |    | -0.615 | -0.393 | 0.37   | 0.313  | -0.182 | -0.194 | -0.134 | -0.144 |
| A020917_01 |    | -0.353 | -0.107 | -0.42  | -0.389 | 0.656  | 1.032  | 0.307  | 0.545  |
| A020919_01 |    | -0.503 | -0.475 | -0.069 | -0.236 | -0.739 | -0.802 | -0.131 | -0.11  |
| A020924_01 |    | 0.441  | 0.196  | -0.065 | 0.188  | 0.076  | 0.105  | 0.029  | -0.152 |
| A020926_01 |    | 0.21   | 0.474  | 0.479  | 0.29   | 0.201  | 0.281  | -0.333 | -0.31  |
| A020928_01 |    | -0.265 | -0.101 | 0.126  | 0.242  | 0.177  | 0.176  | 0.06   | 0.114  |
| A020929_01 |    | -0.338 | -0.088 | -0.182 | -0.224 | 0.152  | 0.396  | -0.143 | -0.039 |
| A020930_01 |    | -0.909 | -0.568 | -1.177 | -0.87  | -1.935 | -2.025 | -1.522 | -1.531 |
| A020934_01 |    | -0.355 | -0.545 | 0.359  | 0.126  | 0.051  | 0.104  | -0.128 | -0.267 |
| A020937_01 |    | -0.221 | -0.239 | 0.057  | -0.083 | -0.178 | -0.331 | 0.102  | -0.003 |
| A020943_01 |    | 0.09   | 0.078  | 0.192  | 0.194  | -0.137 | -0.168 | -0.32  | -0.222 |
| A020944_01 |    | 0.189  | 0.089  | 0.055  | 0.054  | -0.426 | -0.557 | NA     | -0.383 |
| A020949_01 |    | 0.1    | 0.091  | 0.088  | -0.204 | 0.119  | 0.081  | -0.137 | -0.085 |
| A020952_01 |    | -0.071 | 0.126  | -0.389 | -0.53  | 0.468  | 0.438  | 0.047  | 0.112  |
| A020955_01 |    | 0.501  | 0.494  | 0.068  | 0.192  | 0.082  | 0.01   | 0.359  | 0.331  |
| A020958_01 |    | 0.083  | 0.205  | -0.334 | -0.124 | 0.037  | 0.117  | -0.072 | -0.107 |
| A020959_01 |    | -0.134 | 0.036  | -0.001 | 0.201  | 0.193  | 0.232  | 0.329  | 0.396  |
| A020960_01 |    | -0.241 | -0.093 | -0.266 | -0.3   | 0.034  | 0.328  | 0.078  | 0.233  |
| A020961_01 |    | 0.34   | NA     |        | 0.085  | NA     | -0.143 | NA     | NA     |
| A020964_01 | NA | NA     |        | -0.077 | NA     |        | 0.341  | NA     | NA     |
| A020965_01 |    | -0.003 | 0.136  | 0.141  | 0.064  | 0.005  | 0.036  | -0.023 | -0.136 |
| A020970_01 |    | -0.053 | -0.111 | 0.157  | -0.03  | -0.13  | -0.212 | 0.008  | -0.237 |
| A020971_01 |    | 0.404  | 0.64   | 1.204  | 1.447  | 1.417  | 1.939  | 0.129  | 0.318  |
| A020974_01 |    | -0.512 | -0.125 | -0.03  | -0.254 | -0.726 | -0.747 | -0.827 | -0.873 |
| A020976_01 |    | 0.373  | NA     | -0.11  | -0.333 | NA     | -0.174 | 0.042  | -0.331 |
| A020978_01 |    | -0.024 | -0.043 | NA     |        | -0.323 | -0.702 | NA     | -1.296 |
| A020980_01 |    | -0.14  | -0.017 | -0.194 | -0.02  | 0.336  | 0.751  | 0.055  | 0.107  |
| A020981_01 |    | 0.213  | 0.365  | 0.163  | 0.196  | -0.446 | -0.466 | -0.245 | -0.209 |
| A020982_01 |    | -0.022 | 0.048  | 0.088  | 0.09   | 0.161  | 0.122  | 0.131  | 0.048  |
| A020985_01 |    | -0.045 | -0.131 | -0.048 | -0.183 | -0.001 | 0.109  | -0.04  | -0.005 |
| A020987_01 |    | 0.022  | -0.041 | 0.105  | -0.11  | -0.173 | -0.314 | 0.207  | 0.14   |
| A020991_01 |    | -0.112 | -0.138 | 0.025  | 0.086  | 0.052  | 0.116  | -0.138 | -0.236 |
| A020992_01 |    | 0.198  | 0.062  | -0.095 | 0.11   | 0.078  | 0.381  | -0.183 | -0.154 |
| A020997_01 |    | -0.137 | 0.002  | 0.155  | 0.101  | 0.231  | 0.168  | 0.196  | 0.194  |
| A020998_01 |    | -0.231 | -0.261 | -0.243 | -0.344 | -1.004 | -1.152 | -0.396 | -0.369 |
| A020999_01 |    | -0.114 | -0.154 | -0.141 | 0.014  | -0.83  | -0.826 | -0.449 | -0.489 |
| A021002_01 |    | 0.09   | 0.297  | -0.199 | -0.116 | -0.139 | -0.071 | -0.239 | -0.151 |
| A021003_01 |    | -0.169 | NA     | 0.188  | -0.044 | -0.155 | -0.163 | -0.012 | 0.071  |
| A021005_01 | NA | NA     |        | -0.016 | 0.064  | NA     |        | 0.2    | 0.084  |
| A021009_01 |    | 0.099  | -0.205 | -0.005 | -0.391 | 0.003  | -0.18  | NA     | -0.137 |
| A021010_01 |    | -0.226 | -0.307 | -0.07  | 0.066  | -1.284 | -1.183 | -0.686 | -0.725 |
| A021011_01 |    | -0.303 | -0.007 | -0.061 | -0.119 | -0.159 | -0.037 | -0.306 | -0.19  |
| A021012_01 |    | 0.173  | 0.18   | 0.286  | 0.456  | -0.103 | -0.032 | 0.031  | -0.23  |
| A021015_01 |    | 0.043  | -0.02  | -0.043 | -0.102 | -0.026 | -0.098 | 0.081  | -0.104 |
| A021019_01 |    | 0.142  | 0.192  | 0.077  | 0.05   | 0.027  | -0.001 | -0.043 | 0.02   |
| A021021_01 |    | -0.389 | -0.262 | 0.386  | 0.454  | -1.019 | -0.91  | -0.632 | -0.844 |
| A021025_01 |    | 0.269  | 0.23   | -0.031 | 0.007  | 0.008  | -0.011 | -0.097 | -0.183 |
| A021026_01 |    | 0.031  | 0.217  | 0.454  | 0.581  | -0.332 | -0.326 | -1.101 | -0.874 |
| A021034_01 |    | -0.325 | -0.254 | 0.07   | -0.081 | -0.385 | -0.411 | 0.814  | 1.061  |
| A021035_01 |    | 0.104  | NA     | -0.322 | -0.353 | 0.133  | 0.228  | 0.126  | 0.14   |
| A021037_01 |    | -0.648 | -1.065 | 0.365  | 0.443  | -1.481 | -1.612 | -0.387 | -0.473 |
| A021040_01 |    | 0.049  | 0.083  | 0.352  | 0.632  | -0.201 | -0.083 | 0.117  | -0.214 |
| A021041_01 |    | -1.045 | -0.953 | 0.443  | 0.479  | 0.976  | 1.415  | 0.232  | 0.299  |
| A021042_01 |    | 0.718  | 0.645  | 0.461  | 0.485  | 0.384  | 0.442  | -0.665 | -0.699 |
| A021044_01 |    | 1.047  | 0.956  | 0.58   | 0.432  | 0.678  | 0.584  | 0.062  | -0.01  |
| A021045_01 |    | 0.317  | 0.219  | -0.501 | -0.339 | -0.664 | -1.012 | 0.31   | 0.058  |
| A021046_01 |    | -0.306 | -0.224 | -0.416 | -0.144 | -0.964 | -1.101 | -0.259 | -0.414 |
| A021047_01 |    | 0.198  | 0.324  | 0.146  | 0.047  | 0.187  | 0.063  | -0.106 | -0.037 |
| A021048_01 |    | -0.388 | -0.435 | -0.012 | -0.051 | -0.042 | -0.033 | -0.062 | NA     |
| A021049_01 |    | -0.083 | -0.362 | 0.051  | -0.051 | -1.099 | -1.309 | -0.275 | -0.44  |
| A021051_01 |    | 0.445  | 0.322  | -0.942 | -0.805 | -1.639 | -2.134 | 0.721  | 0.508  |
| A021053_01 |    | -2.567 | -1.659 | 1.102  | 1.105  | -0.644 | -0.397 | -0.722 | -0.911 |
| A021055_01 |    | 0.693  | 0.496  | -0.114 | 0.067  | -0.246 | -0.582 | 0.256  | -0.079 |



|            |           |        |          |           |          |           |        |        |
|------------|-----------|--------|----------|-----------|----------|-----------|--------|--------|
| A021057_01 | 0.233     | 0.011  | 0.056    | 0.183     | -0.568   | -0.632    | -0.239 | -0.43  |
| A021058_01 | 0.226     | 0.454  | -0.065   | 0.144     | 0.296    | 0.42      | 0.259  | 0.265  |
| A021059_01 | -0.196    | -0.246 | -0.046   | -0.187    | -0.439   | -0.356    | -0.422 | -0.086 |
| A021061_01 | 0.318 NA  |        | 0.48     | 0.258 NA  | NA       |           | -0.05  | -0.228 |
| A021062_01 | -0.347    | -0.478 | 0.237    | -0.101    | -0.375   | -0.517    | -0.234 | -0.473 |
| A021063_01 | 0.2       | 0.298  | -0.195   | -0.042    | -0.255   | -0.173    | -0.245 | -0.303 |
| A021064_01 | -0.123    | -0.078 | -0.098   | -0.042    | -0.185   | -0.172    | -0.127 | 0.015  |
| A021065_01 | 0.775     | 0.593  | 0.181    | 0.183     | 0.045    | -0.237    | 0.403  | 0.341  |
| A021066_01 | NA        | -0.353 | 0.202    | -0.21 NA  |          | -0.169 NA | NA     |        |
| A021067_01 | 0.324 NA  |        | -0.35    | -0.252 NA | NA       |           | 0.358  | 0.123  |
| A021068_01 | 0.052     | -0.03  | -0.052   | -0.162    | 0.179    | 0.293     | 0.034  | -0.208 |
| A021069_01 | -0.142    | -0.03  | -0.086   | -0.054    | 0.623    | 0.792     | 0.305  | 0.202  |
| A021070_01 | -0.465    | 0.011  | -0.048   | 0.101     | -0.372   | -0.143    | -0.322 | 0.01   |
| A021071_01 | 0.155     | 0.762  | 0.282    | 0.016     | 0.708    | 0.971     | -0.232 | 0.266  |
| A021072_01 | -1.533    | -1.042 | -0.017   | 0.094     | 0.623    | 1.201     | 0.159  | 0.351  |
| A021073_01 | 0.021     | 0.001  | 0.107    | -0.162    | 0.161    | -0.081    | -0.045 | 0.043  |
| A021074_01 | -0.378 NA |        | 0.584    | 0.485 NA  | NA       |           | -0.827 | -0.93  |
| A021076_01 | -0.408 NA |        | 0.1      | -0.03 NA  | NA       |           | -0.57  | -0.722 |
| A021078_01 | -0.13     | -0.061 | 0.048    | 0.064     | -0.087   | -0.135    | 0.043  | 0.224  |
| A021079_01 | 0.428     | 0.338  | -0.07    | -0.154    | 0.391    | 0.373     | 0.139  | 0.007  |
| A021081_01 | -0.22     | -0.236 | -0.245   | -0.144    | -0.798   | -0.954    | 0.437  | 0.539  |
| A021084_01 | -0.043    | 0.112  | -0.007   | 0.258     | -0.202   | -0.064    | -0.149 | -0.18  |
| A021085_01 | 0.435     | 0.046  | 0.042    | -0.21     | -0.147   | -0.524    | 0.182  | -0.039 |
| A021086_01 | 0.197     | -0.072 | 0.007    | 0.008     | 0.175    | 0.35      | 0.11   | -0.011 |
| A021088_01 | -0.222    | -0.095 | -0.208   | -0.143    | -0.242   | -0.382    | -0.056 | 0.11   |
| A021089_01 | 0.046     | 0.06   | 0.52     | 0.424 NA  |          | -0.27     | -0.456 | -0.563 |
| A021093_01 | 0.215     | 0.008  | -0.211   | -0.251    | 0.14     | 0.087     | 0.037  | -0.042 |
| A021094_01 | 0.096     | 0.241  | 0.088    | 0.008     | 0.015    | 0.223     | -0.272 | -0.026 |
| A021097_01 | 0.277     | -0.098 | -0.033   | -0.323    | 0.349    | 0.449     | -0.157 | -0.134 |
| A021099_01 | -0.316    | -0.289 | -0.005   | -0.015    | 0.072    | 0.091     | -0.049 | 0.001  |
| A021100_01 | -0.08     | -0.113 | -0.007   | 0.061     | -0.677   | -0.888    | -0.094 | -0.265 |
| A021102_01 | 0.016     | -0.021 | -0.237   | -0.267    | 0.012    | 0.009     | 0.096  | 0.149  |
| A021103_01 | 0.561     | 0.776  | 1.185    | 1.043     | -0.583   | -0.613    | -0.649 | -0.398 |
| A021104_01 | 0.028     | 0.1    | -0.273   | -0.347    | 0.066    | 0.181     | -0.15  | 0.177  |
| A021106_01 | -0.268    | -0.218 | -0.13    | -0.059    | -0.403   | -0.476    | 0.009  | 0.06   |
| A021107_01 | 0.22      | 0.037  | 0.105    | -0.166 NA |          | -0.754 NA |        | -0.721 |
| A021108_01 | 0.634 NA  |        | 1.079    | 0.988 NA  |          | -0.094    | -0.352 | -0.478 |
| A021109_01 | 0.229 NA  |        | -0.373   | -0.393 NA |          | -0.68     | -0.009 | -0.248 |
| A021110_01 | -0.049    | -0.195 | 0        | -0.31     | 0.009    | -0.096 NA |        | -0.156 |
| A021111_01 | -0.094    | -0.136 | 0.011    | 0.069     | 0.259    | 0.369     | -0.17  | -0.267 |
| A021112_01 | -0.304    | -0.19  | -0.073   | 0.396     | -0.058   | 0.335     | -0.271 | -0.097 |
| A021113_01 | -0.224    | -0.208 | -0.112   | 0.049     | -0.018   | 0.115     | 0.171  | 0.121  |
| A021117_01 | -0.248    | -0.086 | -0.012   | -0.119    | 0.086    | 0.151     | 0.142  | 0.175  |
| A021118_01 | -0.063    | -0.019 | 0.166    | 0.192     | 0.5      | 0.442 NA  | NA     |        |
| A021119_01 | -0.282    | -0.207 | -0.353   | -0.11     | -0.419   | -0.486    | 0.09   | -0.219 |
| A021120_01 | -0.195 NA |        | 0.186    | 0.143     | -0.08    | -0.248    | -0.062 | -0.275 |
| A021121_01 | 0.234     | 0.125  | 0.059    | -0.071    | -0.269   | -0.336    | 0.005  | 0.091  |
| A021123_01 | 0.093     | -0.142 | 0.111    | 0.031     | -0.037   | -0.267    | 0.309  | 0.03   |
| A021124_01 | -0.049    | -0.075 | -0.068   | -0.337    | 0.028    | -0.118    | 0.058  | 0.173  |
| A021125_01 | 0.291     | 0.056  | -0.339   | -0.294    | 0.084    | 0.002     | 0.328  | 0.128  |
| A021126_01 | 0.164     | 0.077  | 0.133    | 0.092     | 0.256    | 0.261     | 0.076  | -0.048 |
| A021127_01 | 0.083     | -0.196 | 0.237    | 0.054     | 0.078    | -0.033    | 0.058  | -0.388 |
| A021128_01 | 0.056     | -0.141 | -0.068   | 0.078     | 0.321    | 0.44      | 0.246  | 0.115  |
| A021129_01 | 0.13      | -0.038 | 0.373    | 0.403     | 0.542    | 0.707     | 0.176  | 0.128  |
| A021130_01 | 0.295     | 0.323  | 0.033    | 0.264     | -0.056   | 0.133     | -0.109 | -0.212 |
| A021131_01 | 0.453     | 0.506  | 0.015    | 0.084     | 0.286    | 0.156     | -0.145 | -0.133 |
| A021132_01 | -0.214    | -0.284 | -0.315   | -0.35     | -0.177   | -0.086    | 0.123  | 0.351  |
| A021133_01 | 0.19      | 0.202  | -0.222   | -0.193    | -0.77    | -0.829    | -0.427 | -0.349 |
| A021134_01 | 0.117     | 0.014  | 0.29     | 0.26      | 0.307    | 0.335     | 0.031  | -0.183 |
| A021136_01 | 0.085     | -0.046 | 0.02     | 0.063     | -0.062   | 0.032     | -0.35  | -0.375 |
| A021137_01 | -1.404    | -0.988 | 0.201    | 0.228     | 1.116    | 1.695     | 0.003  | 0.167  |
| A021139_01 | 0.145 NA  |        | 0.046    | 0.14      | -0.037   | 0.129 NA  |        | 0.035  |
| A021140_01 | 0.112 NA  |        | 0.093    | -0.223    | 0.228    | 0.169     | 0.095  | 0.164  |
| A021142_01 | 0.374     | 0.063  | -0.197   | -0.432    | 0.342    | 0.428     | 0.1    | 0.175  |
| A021146_01 | -0.347    | -0.219 | 0.027    | -0.261    | 0.237    | 0.521     | -0.107 | 0.211  |
| A021147_01 | -0.272    | -0.043 | 0.549    | 0.224     | 0.537    | 0.852     | -0.028 | 0.333  |
| A021148_01 | -0.043    | 0.107  | 0.256    | 0.023     | 0.361    | 0.704     | -0.276 | 0.185  |
| A021149_01 | -0.05 NA  |        | 0.188 NA |           | 0.247 NA | NA        |        | 1.148  |

|            |           |          |           |           |           |           |           |        |
|------------|-----------|----------|-----------|-----------|-----------|-----------|-----------|--------|
| A021150_01 | -0.548    | -0.212   | 0.53      | 0.205     | 0.987     | 1.125     | 0.132     | 0.611  |
| A021160_01 | 0.179     | 0.21     | -0.256    | -0.283    | 0.115     | 0.232     | 0.005     | 0.204  |
| A021195_01 | -0.167    | -0.385   | 0.14      | 0.043     | 0.671     | 0.89      | 0.42      | 0.327  |
| A021200_01 | -0.316    | -0.278   | -0.093    | -0.261    | -0.059    | -0.048    | -0.035    | 0.165  |
| A021206_01 | -0.179    | -0.402   | 0.416     | 0.343     | 0.876     | 1.118     | 0.241     | 0.244  |
| A021207_01 | -0.17     | -0.214   | -0.142    | -0.122    | 0.119     | 0.359     | 0.162     | 0.208  |
| A021208_01 | 0.021 NA  |          | -0.074 NA | NA        |           | -0.08 NA  | NA        |        |
| A021209_01 | 0.051 NA  |          | 0.14      | 0.236     | 0.436     | 0.408     | -0.18     | -0.314 |
| A021212_01 | 0.318     | -0.027   | 0.159     | -0.123    | -0.578    | -1.064    | 0.309     | -0.061 |
| A021213_01 | -0.149    | -0.265   | -0.288    | -0.159    | -0.379    | -0.479    | 0.106     | -0.09  |
| A021214_01 | 0.287     | 0.039    | 0.233     | 0.088     | -0.372    | -0.643    | 0.058     | -0.244 |
| A021218_01 | -0.066    | -0.084   | -0.205    | -0.056    | -0.035    | -0.017    | -0.165    | -0.158 |
| A021219_01 | 0.198     | 0.38     | -0.168    | -0.144    | 0.011     | -0.024    | 0.355     | 0.34   |
| A021220_01 | 0.027     | 0.075    | 0.031     | -0.081    | -0.126    | -0.135    | -0.042    | -0.035 |
| A021222_01 | -0.312    | -0.115   | -0.104    | -0.113    | -0.935    | -0.989    | -0.45     | -0.362 |
| A021223_01 | -0.151    | -0.025   | -0.183    | -0.199    | 0.11      | 0.244     | -0.294    | -0.141 |
| A021224_01 | -0.206    | -0.07    | 0.3       | 0.222     | 0.21      | 0.246     | 0.09      | 0.082  |
| A021225_01 | -0.176    | -0.313   | -0.151    | -0.078    | -0.215    | -0.041    | -0.094    | -0.073 |
| A021227_01 | -0.595 NA | NA       | NA        |           | -0.075    | -0.046 NA |           | -0.26  |
| A021230_01 | -1.698    | -2.009   | -3.083    | -2.48     | -0.466    | 0.034     | -1.984    | -1.768 |
| A021233_01 | -0.249    | -0.144   | 0.004     | -0.023    | -0.929    | -1.089    | -0.172    | -0.23  |
| A021234_01 | 0.037     | 0.055    | -0.176    | -0.18     | 0.01      | 0.096     | 0.162     | 0.042  |
| A021235_01 | -0.198    | -0.157   | -0.011    | -0.062    | -0.465    | -0.652    | 0.076     | 0.021  |
| A021238_01 | 0.094     | 0.051    | -0.103    | -0.212    | -0.079    | -0.01     | 0.357     | 0.239  |
| A021239_01 | -0.113    | 0.006    | -0.022    | -0.247    | 0.32      | 0.393     | 0.132     | 0.164  |
| A021241_01 | -0.044    | -0.081   | -0.304    | -0.359    | -0.17     | -0.078    | 0.108     | 0.174  |
| A021249_01 | -0.719    | -0.209   | -0.393    | -0.333    | 0.117     | 0.582     | -0.63     | -0.194 |
| A021252_01 | -0.373    | -0.184   | -0.15     | -0.104    | -1.105    | -1.4      | -0.252    | -0.224 |
| A021253_01 | -0.626    | -0.29    | -0.291    | 0.009     | -1.307    | -1.392    | -0.617    | -0.345 |
| A021261_01 | -0.075    | -0.127   | 0.084     | 0.089     | -1.146    | -1.252    | -0.295    | -0.37  |
| A021267_01 | -0.063    | -0.264   | -0.13     | -0.006    | 0.024     | 0.094     | -0.077    | -0.15  |
| A021269_01 | NA        | -0.063   | -0.019    | -0.094    | 0.166     | 0.195     | 0.158     | 0.023  |
| A021274_01 | -0.303    | -0.245   | 0.067     | -0.177    | -1.039    | -1.131    | -0.244    | -0.036 |
| A021276_01 | 0.064     | -0.019   | 0.039     | 0.058     | 0.228     | 0.261     | 0.136     | 0.216  |
| A021293_01 | -0.743 NA |          | -0.739    | -0.895    | -0.625    | -0.602 NA |           | -0.479 |
| A021294_01 | -0.004    | 0.136    | -0.186    | -0.187    | 0.344     | 0.392     | 0.214     | 0.193  |
| A021295_01 | -0.211    | -0.189   | -0.495    | -0.453    | -0.076    | 0.026     | 0.151     | 0.143  |
| A021299_01 | -0.783    | -0.646   | -1.004    | -0.86     | -1.139    | -1.112    | -0.833    | -0.801 |
| A021303_01 | -0.216    | -0.37    | 0.162     | 0.226     | -0.807    | -0.846    | -0.048    | -0.053 |
| A021309_01 | 0.405     | 0.48     | -0.503    | -0.435    | 0.463     | 0.763     | 0.466     | 0.457  |
| A021313_01 | 0.137     | 0.201    | -0.154    | -0.153    | 0.006     | 0.179     | -0.215    | -0.024 |
| A021323_01 | -0.029 NA | NA       |           | 0.056 NA  |           | -0.957 NA |           | -0.145 |
| A021335_01 | 0.31 NA   |          | -0.333    | -0.391 NA |           | -1.461    | 0.124     | 0.003  |
| A021338_01 | -0.351    | -0.785   | -0.095    | -0.272    | -0.708    | -0.685    | -0.232 NA |        |
| A021339_01 | -0.002    | 0.17 NA  |           | -0.604    | 0.467     | 0.637 NA  |           | 0      |
| A021340_01 | -0.322    | -0.271   | -0.142    | -0.29     | 0.018     | 0.101     | -0.192    | 0.023  |
| A021341_01 | -0.271    | -0.171   | -0.022    | -0.09     | -0.004    | 0.122     | -0.186    | 0.008  |
| A021342_01 | 0.005     | -0.11    | 0.192     | 0.187     | 0.238     | 0.008     | -0.253    | -0.413 |
| A021344_01 | -0.328    | -0.263   | 0.145     | 0.141     | -1.099    | -1.393    | -0.236    | -0.249 |
| A021347_01 | 0.261     | 0.273    | 0.003     | 0.125     | 0.489     | 0.554     | 0.198     | 0.134  |
| A021354_01 | -0.292    | 0.134 NA | NA        |           | 0.52      | 0.908 NA  |           | 0.287  |
| A021368_01 | -0.202    | 0.03     | 0.151     | -0.018    | 0.258     | 0.344     | -0.147    | 0.203  |
| A021372_01 | 0.012     | 0.34     | 0.104     | -0.038    | 0.105     | 0.129     | -0.124    | -0.017 |
| A021375_01 | 0.181     | 0.297    | -0.21     | 0.04      | 0.246     | 0.528     | -0.074    | 0.037  |
| A021377_01 | 0.223     | 0.625    | 0.133     | -0.043    | 0.442     | 0.671     | 0.043     | 0.408  |
| A021389_01 | -0.115    | -0.1     | -0.272    | -0.019    | -1.066 NA |           | -0.315    | -0.223 |
| A021392_01 | -0.07     | -0.044   | -0.093    | -0.075    | 0.019     | -0.023    | -0.209    | -0.304 |
| A021395_01 | 0.17      | 0.145    | -0.076    | -0.126    | 0.126     | 0.082     | -0.045    | 0.026  |
| A021401_01 | 0.17 NA   |          | 0.067     | -0.221    | -0.137    | -0.196    | 0.227     | 0.113  |
| A021411_01 | -0.547 NA |          | -0.221    | -0.096 NA | NA        |           | -1.15     | -1.182 |
| A021413_01 | 0.255 NA  |          | -0.089    | -0.378    | -0.002    | -0.202    | 0.257     | 0.127  |
| A021419_01 | -0.3      | -0.363   | -1.475    | -1.43     | 0.14      | 0.45      | -0.999    | -1.111 |
| A021427_01 | -0.005    | 0.174    | -0.02     | 0.149     | 0.084     | 0.142     | -0.092    | -0.118 |
| A021428_01 | 0.217 NA  |          | 0.075     | -0.046 NA |           | -0.451    | -0.003    | -0.179 |
| A021434_01 | -0.523    | -0.178   | 0.058     | -0.306    | -0.782    | -0.866    | -0.057    | 0.206  |
| A021438_01 | -0.058    | 0        | 0.167     | 0.107     | 0.333     | 0.426     | -0.096    | -0.11  |
| A021440_01 | -0.125    | -0.08    | -0.182    | -0.047    | -0.026    | 0.039     | -0.022    | 0.099  |
| A021441_01 | -0.232    | -0.067   | -0.299    | -0.351    | -0.039    | 0.133     | -0.034    | 0.245  |

|            |           |           |          |           |        |           |          |        |
|------------|-----------|-----------|----------|-----------|--------|-----------|----------|--------|
| A021444_01 | -0.229    | -0.068    | -0.046   | -0.068    | -0.204 | -0.063    | -0.038   | 0.077  |
| A021451_01 | -0.132    | 0.091     | -0.061   | -0.094    | 0.115  | 0.261     | 0.036 NA |        |
| A021454_01 | -0.059    | -0.182    | -0.123   | -0.255    | 0.067  | 0.244     | -0.046   | -0.054 |
| A021462_01 | 0.017     | -0.039    | -0.371   | -0.363    | -0.134 | -0.056    | 0.268    | 0.15   |
| A021464_01 | 0.385     | 0.109     | -0.333   | -0.4      | -0.929 | -1.17     | 0.552    | 0.39   |
| A021466_01 | 0.33 NA   |           | -0.055   | 0.231 NA  | NA     |           | -0.004   | 0.212  |
| A021467_01 | -0.538 NA |           | -0.132   | -0.411    | -0.447 | -0.448    | -0.047   | 0.017  |
| A021472_01 | -0.511    | -0.156    | 0.201    | -0.129    | -0.783 | -0.932    | 0.256    | 0.052  |
| A021474_01 | 0.028     | 0.037     | -0.364   | -0.135    | -0.215 | -0.123    | 0.127    | 0.194  |
| A021476_01 | 0.125     | -0.132    | 0.2      | 0.155     | -0.59  | -0.817    | 0.033    | -0.17  |
| A021491_01 | -0.269    | -0.161    | 0.02     | -0.01     | -0.179 | -0.086    | -0.05    | -0.07  |
| A021492_01 | -0.372    | -0.13     | -0.093   | -0.291    | 0.207  | 0.335     | 0.249    | 0.412  |
| A021494_01 | -0.45     | -0.25     | 0.03     | -0.266    | -0.885 | -1        | -0.288   | -0.201 |
| A021497_01 | -0.635    | -0.38     | -0.336   | -0.322    | -0.98  | -0.931    | -0.494   | -0.214 |
| A021498_01 | -0.131    | -0.076    | -0.279   | -0.272    | 0.075  | 0.174 NA  |          | -0.075 |
| A021500_01 | -0.341    | -0.304    | -0.316   | -0.217    | -1.161 | -1.184    | -0.385   | -0.358 |
| A021510_01 | -0.617    | -0.254    | -0.206   | -0.163    | -1.101 | -1.158    | -0.416   | -0.264 |
| A021511_01 | -0.12     | -0.051    | -0.246   | -0.174    | -0.127 | -0.002    | -0.064   | -0.056 |
| A021517_01 | -0.215    | -0.211    | -0.107   | 0.18      | -0.939 | -0.956    | -0.097   | -0.239 |
| A021520_01 | -0.179    | -0.297    | -0.541   | -0.444    | -0.283 | -0.09     | -0.135   | -0.129 |
| A021521_01 | -0.09 NA  |           | 0.476    | 0.052     | -0.821 | -1.053    | 0.258    | 0.407  |
| A021526_01 | -0.333    | -0.283    | -0.116   | 0.049     | -0.472 | -0.365    | -0.268   | -0.241 |
| A021528_01 | 0.193 NA  |           | 0.35     | 0.206     | 0.169  | -0.085    | 0.11     | 0.12   |
| A021529_01 | 0.212     | 0.113     | -0.301   | -0.302    | 0.297  | 0.305     | 0.324    | 0.158  |
| A021538_01 | -0.186    | 0.059     | 0.335    | 0.066     | 0.558  | 0.681 NA  |          | -0.059 |
| A021539_01 | -0.309    | -0.126    | 0.262    | -0.155    | -0.476 | -0.471    | 0.086    | 0.078  |
| A021542_01 | -0.124    | -0.03     | 0.067    | 0.026     | -0.402 | -0.318 NA |          | 0.031  |
| A021546_01 | 0.26      | 0.628     | 0.499    | 0.222     | 0.686  | 0.775     | -0.008   | 0.108  |
| A021549_01 | -0.441    | -0.259    | -0.25    | -0.04     | -0.729 | -0.569    | -0.374   | -0.281 |
| A021551_01 | -0.813    | -0.819    | -0.212   | -0.417    | -0.485 | -0.295    | 0.04     | 0.101  |
| A021552_01 | -0.274    | -0.092    | -0.104   | 0.103     | -0.15  | -0.064    | 0.16     | 0.198  |
| A021557_01 | -0.006    | 0.29      | -0.417   | -0.611    | 0.156  | 0.377 NA  |          | 0.033  |
| A021560_01 | 0.012 NA  |           | 0.088    | -0.28     | -0.196 | -0.226 NA |          | -0.226 |
| A021562_01 | -0.185    | -0.067    | -0.212   | -0.149    | 0.034  | 0.156     | 0.344    | 0.275  |
| A021563_01 | -0.212    | -0.283    | 0.172    | 0.11      | -0.246 | -0.116    | -0.095   | -0.054 |
| A021565_01 | -0.093    | -0.109    | -0.195   | 0.036     | -0.951 | -0.785    | -0.47    | -0.398 |
| A021567_01 | 0.148     | -0.124    | -0.305   | -0.458    | 0.039  | -0.01     | 0.288    | 0.115  |
| A021568_01 | -0.03     | -0.107    | 0.039    | -0.106    | 0.208  | 0.349     | 0.072    | -0.046 |
| A021577_01 | -0.387    | -0.39     | -0.244   | -0.104    | -1.068 | -1.291    | -0.281   | -0.404 |
| A021580_01 | -0.096    | -0.037    | -0.185   | -0.055    | -0.003 | 0.004     | 0.197    | 0.032  |
| A021585_01 | -0.441    | -0.684    | -0.02    | -0.012    | -0.712 | -0.608    | -0.208   | -0.282 |
| A021587_01 | 0.046     | -0.091    | -0.104   | -0.17     | 0.068  | 0.022     | 0.194    | -0.038 |
| A021589_01 | 0.144     | 0         | 0.226    | 0.079     | -0.054 | -0.239    | 0.079    | -0.069 |
| A021592_01 | -0.048    | -0.198    | 0.086    | -0.138    | 0.37   | 0.614     | 0.298    | 0.329  |
| A021593_01 | -1.005    | -1.282    | -0.242   | -0.246    | -0.414 | -0.27     | 0.309    | 0.657  |
| A021594_01 | -0.189    | 0.001     | -0.133   | -0.051    | 0.524  | 0.783     | 0.26     | 0.376  |
| A021595_01 | -1.099    | -0.595    | -0.34    | -0.521    | 0.716  | 0.929     | 0.326    | 0.407  |
| A021601_01 | -0.359    | -0.363    | -0.254   | -0.186    | -1.097 | -1.268    | -0.239   | -0.291 |
| A021607_01 | -0.11     | -0.15     | -0.33    | -0.43     | 0.24   | 0.47      | 0.155    | 0.188  |
| A021613_01 | -0.732    | -0.779    | -0.456   | -0.673    | -0.462 | -0.575    | -0.158   | -0.152 |
| A021615_01 | 0.442     | 0.373     | 0.074    | 0.055     | -0.107 | -0.238    | 0.04     | -0.052 |
| A021616_01 | 0.064     | -0.304 NA |          | -0.153 NA |        | 0.122 NA  | NA       |        |
| A021619_01 | -0.391 NA |           | 0.151 NA |           | 0.301  | 0.399 NA  | NA       |        |
| A021628_01 | 0.514     | 0.426     | 0.102    | -0.149    | -0.528 | -0.625    | -0.658   | -0.361 |
| A021629_01 | 0.043     | 0.186     | -0.438   | -0.413    | -0.383 | -0.476    | -0.119   | 0.021  |
| A021635_01 | 0.123     | 0.242     | 0.289    | -0.049    | 0.534  | 0.597     | -0.03    | -0.058 |
| A021636_01 | 0.076     | -0.271    | -0.189   | -0.314    | 0.119  | 0.226     | 0.355    | 0.269  |
| A021638_01 | -0.07     | -0.003    | -0.089   | -0.149    | -0.06  | 0.1       | 0.077    | 0.118  |
| A021640_01 | -0.147    | 0.009     | -0.076   | -0.237    | -0.057 | -0.038    | -0.009   | 0.19   |
| A021641_01 | 0.212     | -0.032    | -0.125   | -0.045    | 0.451  | 0.527     | 0.292    | 0.184  |
| A021643_01 | -0.166    | 0.166     | 0.023    | -0.405    | 0.046  | 0.436     | -0.062   | 0.576  |
| A021647_01 | -0.161    | -0.151    | -0.114   | -0.095    | -0.84  | -0.826    | -0.214   | 0.029  |
| A021648_01 | 0.307     | -0.038    | -0.102   | -0.254    | -0.077 | -0.342    | 0.251    | -0.042 |
| A021652_01 | 0.09      | 0.002     | 0.012    | 0.04      | 0.103  | 0.03      | 0.055    | 0.004  |
| A021659_01 | -0.444    | -0.347 NA | NA       |           | -0.149 | 0.027 NA  | NA       |        |
| A021661_01 | 0.02 NA   |           | 0.012    | -0.413 NA |        | 0.054 NA  |          | 0.073  |
| A021662_01 | -0.172 NA | NA        |          | -0.099    | -0.253 | -0.203 NA | NA       |        |
| A021670_01 | 0.112     | -0.128    | -0.278   | -0.178    | 0.07   | 0.207     | 0.352    | 0.244  |

|            |        |        |        |        |        |        |        |        |
|------------|--------|--------|--------|--------|--------|--------|--------|--------|
| A021673_01 | 0.262  | NA     | -0.182 | -0.282 | NA     | 0.259  | 0.209  | -0.101 |
| A021677_01 | 0.307  | -0.023 | -0.229 | -0.183 | -0.263 | -0.552 | NA     | -0.12  |
| A021682_01 | -0.122 | -0.237 | -0.118 | -0.07  | -0.442 | -0.577 | 0.158  | -0.18  |
| A021691_01 | -0.146 | -0.106 | -0.301 | -0.353 | -0.106 | 0.008  | 0.095  | 0.175  |
| A021696_01 | 0.08   | 0.183  | 0.056  | 0.203  | -0.361 | -0.26  | -0.516 | -0.466 |
| A021697_01 | -0.087 | -0.087 | -0.176 | -0.26  | -0.062 | -0.104 | 0.092  | -0.063 |
| A021700_01 | -0.083 | -0.014 | 0.265  | -0.019 | -0.102 | 0.198  | -0.271 | -0.264 |
| A021701_01 | -0.379 | -0.389 | -0.207 | -0.141 | -1.208 | -1.221 | -0.328 | -0.229 |
| A021703_01 | -0.155 | -0.182 | -0.484 | -0.309 | -0.213 | -0.124 | 0.443  | 0.282  |
| A021708_01 | 0.015  | NA     | 0.098  | 0.085  | -0.069 | 0.461  | 0.094  | 0.08   |
| A021709_01 | -0.028 | NA     | 0      | -0.212 | 0.706  | 1.023  | NA     | NA     |
| A021712_01 | -0.478 | -0.271 | -0.198 | 0.103  | -1.082 | -1.155 | -0.362 | -0.278 |
| A021718_01 | -0.464 | NA     | -0.603 | -0.526 | NA     | NA     | -1.061 | NA     |
| A021719_01 | 0.009  | 0.101  | -0.325 | -0.331 | 0.303  | 0.496  | 0.276  | 0.397  |
| A021724_01 | -0.29  | 0.191  | -0.274 | -0.604 | 0.15   | 0.344  | 0.186  | 0.297  |
| A021726_01 | -0.433 | -0.355 | -0.232 | -0.229 | -0.261 | -0.214 | NA     | 0.204  |
| A021730_01 | -0.041 | -0.14  | -0.216 | -0.318 | -1.084 | -1.229 | -0.462 | -0.468 |
| A021739_01 | -0.3   | -0.299 | -0.254 | -0.37  | -0.444 | -0.413 | -0.082 | -0.217 |
| A021749_01 | 0.455  | 0.184  | -0.667 | -0.685 | -0.272 | -0.541 | -1.059 | -0.841 |
| A021753_01 | -0.128 | NA     | 0.381  | NA     | NA     | -0.242 | NA     | NA     |
| A021759_01 | 0.286  | 0.197  | -0.364 | -0.413 | -0.021 | 0.015  | 0.027  | 0.015  |
| A021760_01 | -0.406 | -0.035 | -0.347 | -0.313 | -0.333 | -0.21  | -0.106 | 0.069  |
| A021765_01 | -0.08  | NA     | -0.235 | 0.034  | 0.113  | 0.209  | 0.204  | 0.061  |
| A021769_01 | -0.017 | NA     | -0.13  | -0.242 | 0.274  | 0.246  | 0.153  | 0.143  |
| A021771_01 | -0.35  | 0.013  | -0.117 | -0.322 | -0.678 | -0.561 | -0.383 | -0.165 |
| A021772_01 | -0.079 | 0      | -0.12  | -0.057 | 0.13   | 0.328  | 0.088  | 0.06   |
| A021782_01 | -0.472 | -0.337 | -0.159 | 0.022  | -1.118 | -1.062 | -0.145 | -0.258 |
| A021785_01 | -0.055 | -0.051 | -0.077 | -0.164 | -0.562 | -0.853 | -0.035 | -0.232 |
| A021786_01 | -0.151 | -0.08  | 0.14   | 0.203  | 0.018  | 0.192  | -0.044 | -0.077 |
| A021791_01 | 0.301  | -0.012 | 0.004  | 0.151  | 0.098  | 0.078  | 0.04   | -0.234 |
| A021794_01 | -1.121 | NA     | 0.383  | -0.261 | -0.333 | NA     | -0.067 | 0.129  |
| A021796_01 | 0.44   | 0.516  | -0.224 | 0.055  | -0.758 | -0.826 | 0.03   | -0.161 |
| A021797_01 | 0.271  | -0.033 | 0.32   | -0.151 | 0.46   | 0.458  | 0.149  | -0.148 |
| A021799_01 | -0.451 | -0.516 | -0.262 | -0.205 | -0.463 | -0.508 | 0.153  | 0.01   |
| A021802_01 | -0.305 | -0.287 | -0.243 | -0.113 | -1.344 | -1.335 | -0.132 | -0.32  |
| A021803_01 | -0.056 | 0.073  | -0.276 | -0.059 | -0.649 | -0.488 | -0.351 | -0.162 |
| A021804_01 | 0.097  | 0.123  | -0.052 | -0.321 | 0.1    | 0.005  | 0.005  | 0.033  |
| A021805_01 | -0.022 | 0.278  | 0.02   | 0.144  | 0.286  | 0.515  | -0.099 | -0.039 |
| A021807_01 | -0.269 | -0.091 | -0.32  | -0.197 | -0.074 | 0.176  | -0.688 | NA     |
| A021810_01 | 0.078  | -0.03  | -0.039 | -0.114 | -0.101 | -0.015 | -0.192 | -0.143 |
| A021811_01 | -0.368 | 0.15   | -0.655 | -0.392 | 0.255  | 0.707  | 0.091  | 0.491  |
| A021812_01 | -0.445 | NA     | -0.189 | -0.574 | -0.141 | -0.131 | NA     | NA     |
| A021813_01 | 0.061  | 0.167  | -0.131 | -0.281 | 0.318  | 0.455  | 0.069  | 0.301  |
| A021814_01 | -0.085 | 0.012  | 0.294  | 0.141  | 0.364  | 0.505  | -0.017 | -0.01  |
| A021815_01 | -0.293 | -0.298 | -0.282 | -0.31  | -0.341 | 0.041  | -0.495 | -0.182 |
| A021816_01 | -0.087 | NA     | -0.2   | -0.698 | 0.044  | 0.279  | NA     | 0.089  |
| A021817_01 | 0.143  | 0.036  | 0.122  | -0.04  | -0.069 | -0.23  | 0.122  | 0.053  |
| A021818_01 | -0.216 | -0.017 | -0.211 | -0.287 | -0.05  | 0.126  | -0.089 | 0.152  |
| A021820_01 | 0.351  | 0.238  | -0.19  | -0.17  | 0.717  | 0.975  | 0.287  | 0.268  |
| A021821_01 | -0.054 | 0.148  | -0.127 | -0.281 | -0.07  | 0.11   | 0.067  | 0.458  |
| A021822_01 | -0.315 | -0.026 | 0.163  | -0.297 | 0.237  | 0.485  | -0.031 | 0.447  |
| A021823_01 | -0.281 | -0.627 | -0.012 | -0.056 | -0.278 | -0.147 | 0.05   | 0.006  |
| A021827_01 | -0.197 | -0.059 | -0.032 | 0.044  | 0.044  | 0.343  | 0.231  | 0.175  |
| A021828_01 | 0.05   | NA     | 0.258  | 0.166  | NA     | NA     | NA     | NA     |
| A021829_01 | -0.552 | -0.54  | -0.486 | -0.67  | -0.276 | -0.411 | -0.354 | -0.077 |
| A021830_01 | -1.031 | -0.862 | 0.029  | 0.416  | 0.07   | 0.702  | NA     | NA     |
| A021832_01 | 0.195  | NA     | 0.294  | 0.109  | NA     | -0.285 | 0.126  | -0.097 |
| A021833_01 | 0.319  | 0.08   | 0.044  | -0.253 | 0.143  | 0.266  | -0.021 | -0.319 |
| A021835_01 | -0.087 | -0.165 | -0.355 | -0.158 | 0.388  | 0.707  | 0.32   | 0.262  |
| A021838_01 | -0.235 | 0.077  | 0.081  | -0.057 | -0.071 | 0.092  | -0.534 | -0.111 |
| A021839_01 | -0.354 | NA     | 0.435  | 0.219  | 0.546  | 0.589  | 0.1    | 0.074  |
| A021840_01 | -0.157 | -0.15  | 0.116  | NA     | 0.121  | -0.026 | NA     | NA     |
| A021842_01 | -0.425 | -0.449 | 0.129  | 0.17   | -0.097 | 0.11   | -0.126 | 0.123  |
| A021843_01 | -0.004 | 0.12   | -0.394 | -0.101 | -0.015 | 0.197  | -0.04  | -0.072 |
| A021845_01 | -0.136 | -0.125 | -0.069 | -0.156 | -0.084 | 0.068  | -0.14  | -0.201 |
| A021846_01 | -0.03  | -0.167 | 0.103  | 0.031  | -0.084 | -0.444 | 0.072  | -0.23  |
| A021848_01 | 0.067  | NA     | 0.272  | 0.229  | NA     | 0.155  | NA     | -0.076 |
| A021850_01 | 0.014  | 0.247  | -0.02  | -0.131 | 0      | 0.308  | -0.153 | 0.295  |

|            |           |           |           |           |        |           |        |        |
|------------|-----------|-----------|-----------|-----------|--------|-----------|--------|--------|
| A021851_01 | 0.434     | 0.256     | 0.34      | 0.553     | 0.236  | 0.579     | -0.103 | -0.208 |
| A021853_01 | -0.235    | -0.161    | -0.408    | -0.371    | -0.381 | -0.255    | -0.263 | -0.006 |
| A021856_01 | 0.172     | -0.215    | -0.105    | -0.295    | -0.658 | -1.039    | -0.126 | -0.413 |
| A021857_01 | -0.181    | -0.316    | -0.235    | -0.063    | -1.086 | -1.052    | -0.399 | -0.511 |
| A021858_01 | -0.09     | 0.04      | -0.354    | -0.354    | 0.001  | 0.019     | 0.035  | 0.19   |
| A021859_01 | 0.833     | 0.634     | 0.124     | -0.022    | -0.448 | -0.885    | -0.43  | -0.409 |
| A021860_01 | 0.053     | 0.11      | -0.443    | -0.331    | -0.001 | 0.167     | 0.283  | 0.409  |
| A021864_01 | -0.02     | 0.049     | -0.352    | -0.279    | -0.093 | -0.24     | 0.007  | 0.093  |
| A021865_01 | -0.04     | 0.129     | -0.061    | -0.2      | -0.206 | -0.088    | -0.102 | 0.163  |
| A021866_01 | 0.004     | 0.16      | -0.261    | -0.149    | 0.053  | 0.191     | -0.155 | -0.092 |
| A021867_01 | -0.001    | -0.117    | -0.301    | -0.543    | 0.298  | 0.337     | 0.344  | 0.266  |
| A021868_01 | 0.227     | 0.347     | 0.08      | 0.17      | -0.116 | 0.039     | 0.033  | 0.279  |
| A021870_01 | -0.098    | -0.133    | -0.017    | -0.184    | 0.177  | 0.339     | -0.007 | 0.15   |
| A021873_01 | -0.2      | -0.12     | -0.345    | -0.217    | 0.221  | 0.365     | 0.112  | 0.072  |
| A021874_01 | -0.123    | 0.14      | -0.316    | -0.185    | 0.264  | 0.741     | -0.089 | 0.326  |
| A021876_01 | 0.334     | 0.369     | -0.075 NA |           | -0.411 | -0.513 NA |        | 0.275  |
| A021878_01 | -0.205    | -0.1      | -0.162    | -0.516    | -0.202 | -0.103 NA | NA     |        |
| A021882_01 | 0.76      | 0.803     | -0.449    | -0.464    | -0.623 | -0.698    | -0.478 | -0.316 |
| A021884_01 | -0.239    | -0.151    | -0.233    | -0.253    | -0.915 | -1.056    | -0.479 | -0.387 |
| A021885_01 | 0.227     | 0.091     | 0.047     | 0.058     | -0.127 | -0.23     | 0.081  | -0.002 |
| A021888_01 | 0.112     | 0.082     | 0.327     | -0.021    | -0.076 | -0.289    | 0.078  | 0.067  |
| A021889_01 | -0.108    | -0.049    | 0.069     | 0.101     | -0.798 | -0.765    | -0.266 | -0.219 |
| A021890_01 | 0.371     | 0.362     | -0.76     | -0.639    | -0.014 | 0.089     | 0.083  | 0.001  |
| A021891_01 | -0.257    | -0.151    | -0.053    | -0.105    | -0.76  | -0.784    | -0.26  | -0.188 |
| A021893_01 | -0.752    | -0.715    | -1.589    | -1.336    | 0.215  | 0.44      | -0.036 | -0.204 |
| A021894_01 | -0.326    | 0.442     | 0.195     | -0.233    | 0.461  | 0.821     | -0.437 | 0.034  |
| A021895_01 | 0.059     | 0.286     | 0.237     | 0.171     | -0.044 | 0.14      | -0.205 | 0.041  |
| A021897_01 | -0.026    | -0.167    | 0.07      | 0.108     | 0.018  | -0.105    | -0.054 | -0.146 |
| A021898_01 | 0.62      | 0.352     | -0.698    | -0.601    | -0.047 | -0.016    | -0.643 | -0.605 |
| A021899_01 | 0.119 NA  | NA        |           | -0.456 NA |        | 0.041     | 0.427  | -0.096 |
| A021900_01 | 0.079     | 0.038     | 0.113     | -0.217    | -0.185 | -0.362    | 0.142  | 0.025  |
| A021901_01 | -0.373    | -0.31     | -0.111    | -0.23     | -0.034 | 0.058     | -0.779 | -0.436 |
| A021903_01 | 0.437     | -0.172    | 0.352     | 0.088     | -0.575 | -0.852    | -0.115 | -0.426 |
| A021905_01 | -0.501    | -0.109    | -0.151    | -0.213    | -0.865 | -0.823    | -0.045 | 0.031  |
| A021906_01 | -0.231    | -0.209 NA |           | -0.546    | 0.1    | 0.307 NA  |        | 0.064  |
| A021907_01 | 0.234     | 0.389     | 0.4       | 0.277     | 0.345  | 0.503     | -0.06  | 0.008  |
| A021908_01 | -0.655    | -0.939    | -0.71     | -0.935    | -1.118 | -1.318    | -0.504 | -0.333 |
| A021909_01 | -0.095    | -0.133    | 0.048     | -0.054    | -0.968 | -1.085    | -0.101 | -0.232 |
| A021913_01 | -0.245    | 0.149     | -0.859    | -1.019    | 0.366  | 0.514     | 0.47   | 0.586  |
| A021915_01 | 0.228     | -0.184    | 0.01      | -0.098    | 0.091  | -0.15     | 0.303  | -0.132 |
| A021916_01 | 0.02      | 0.164     | 0.116     | -0.01     | 0.021  | 0.173     | -0.27  | -0.157 |
| A021920_01 | -0.023 NA |           | 0.124 NA  | NA        |        | 0.512 NA  |        | 0.323  |
| A021921_01 | -0.037    | -0.154    | -0.679    | -0.697    | -0.309 | -0.081    | 0.279  | 0.222  |
| A021922_01 | 0.206     | 0.014     | 0.026     | -0.035    | 0.355  | 0.554     | 0.146  | 0.01   |
| A021924_01 | -0.411    | 0.024     | 0.362     | -0.146    | 0.13   | 0.318     | -0.066 | 0.609  |
| A021926_01 | -0.048    | 0.138     | -0.022    | -0.138    | -0.034 | 0.304     | -0.328 | -0.056 |
| A021927_01 | -0.313    | -0.223    | -0.55     | -0.653    | -0.211 | -0.124    | -0.026 | 0.16   |
| A021928_01 | -0.002 NA |           | 0.41      | -0.066    | 0.674  | 0.7       | -0.049 | 0.137  |
| A021929_01 | 0.027     | 0.412     | 0.087     | -0.059    | 0.037  | 0.2       | -0.087 | 0.136  |
| A021930_01 | -0.644    | -0.513    | -0.744    | -0.785    | -0.72  | -0.684    | -0.429 | -0.471 |
| A021931_01 | -0.393    | -0.42     | -0.212    | 0.069     | -1.337 | -1.453    | -0.16  | -0.262 |
| A021932_01 | -0.151    | -0.164    | -0.274    | -0.123    | -0.778 | -0.827    | -0.346 | -0.456 |
| A021933_01 | -0.044    | -0.122    | -0.052    | -0.107    | -0.59  | -0.687    | -0.131 | -0.275 |
| A021934_01 | -0.426    | -0.362    | -0.176    | -0.076    | 0.048  | 0.148     | -0.842 | -0.689 |
| A021935_01 | 0.293     | 0.36      | 0.138     | -0.118    | 0.091  | -0.174    | 0.094  | -0.039 |
| A021937_01 | -0.171    | -0.166    | 0.41      | 0.204     | -0.459 | -0.548    | -0.387 | -0.373 |
| A021938_01 | -0.462    | -0.31     | -0.258    | -0.213    | -0.802 | -0.662    | -0.486 | -0.401 |
| A021939_01 | 0.1       | -0.157    | 0.169     | -0.087    | -0.576 | -0.864    | -0.002 | -0.155 |
| A021941_01 | -1.527    | -1.528    | -1.136    | -1.334    | -1.572 | -1.485    | -1.291 | -1.129 |
| A021942_01 | -0.042    | -0.085    | -0.192    | -0.111    | 0.023  | 0.113     | 0.288  | 0.23   |
| A021946_01 | -0.069 NA |           | 0.148     | -0.007    | -0.325 | -0.395 NA |        | 0.028  |
| A021948_01 | 0.197     | 0.138     | 0.194     | -0.333    | 0.005  | -0.079 NA |        | -0.142 |
| A021949_01 | -0.255    | -0.155    | -0.008    | -0.155    | -0.476 | -0.584 NA | NA     |        |
| A021950_01 | -0.095    | -0.093    | -0.178    | -0.085    | -0.808 | -0.848    | -0.392 | -0.357 |
| A021951_01 | -0.047    | -0.127    | 0.169     | 0.048     | -0.142 | -0.106    | 0.177  | 0.18   |
| A021954_01 | 0.645     | 0.093     | 0.352     | 0.099     | -0.661 | -0.929    | 0.456  | 0.135  |
| A021955_01 | 0.187     | 0.061     | -0.012    | -0.239    | -0.53  | -0.676    | 0.179  | 0.198  |
| A021956_01 | 0.202     | 0.319     | 0.135     | -0.099    | 0.345  | 0.389     | 0.034  | 0.17   |

|            |    |           |           |          |          |        |          |        |        |
|------------|----|-----------|-----------|----------|----------|--------|----------|--------|--------|
| A021958_01 |    | 0.294     | 0.431     | 0.483    | 0.444    | 0.132  | 0.382    | -0.179 | -0.104 |
| A021959_01 |    | -1.167 NA | NA        | NA       |          | 0.925  | 1.455 NA |        | -1.995 |
| A021961_01 |    | -0.491    | -0.203    | -0.014   | -0.1     | -1.036 | -0.981   | -0.484 | -0.264 |
| A021962_01 |    | -0.146    | 0.26      | 0.03     | 0.139    | 0.015  | 0.251    | -0.098 | 0.097  |
| A021963_01 |    | -0.174    | -0.28     | 0.346    | -0.141   | 0.141  | 0.042    | 0.236  | -0.054 |
| A021966_01 |    | -0.102    | -0.258    | 0.056    | -0.239   | -0.253 | -0.328   | -0.373 | -0.311 |
| A021968_01 |    | 0.106     | 0.587     | 0.1      | 0.055    | 0.05   | 0.249    | -0.098 | 0.34   |
| A021969_01 |    | -0.19     | -0.131    | -0.093   | -0.092   | -0.105 | 0.03     | 0.034  | 0.193  |
| A021970_01 |    | 0.498     | 0.026     | -0.122   | -0.423   | 0.03   | -0.17    | 0.138  | -0.216 |
| A021971_01 |    | 0.004     | -0.182    | -0.166   | 0.033    | -0.831 | -0.922   | -0.188 | -0.338 |
| A021976_01 |    | -1.772    | -1.385 NA | NA       |          | 1.312  | 1.863    | 0.95   | 0.931  |
| A021978_01 |    | -1.115    | -0.508    | -0.888   | -1.087   | -0.394 | -0.28    | -0.776 | -0.553 |
| A021979_01 |    | -2.487    | -1.565    | -4.005   | -2.779   | 1.091  | 1.43     | -0.815 | -1.221 |
| A021980_01 |    | -0.039    | -0.051    | -0.199   | -0.531   | 0.04   | 0.496 NA | NA     |        |
| A021981_01 |    | -0.019    | 0.15      | 0.091    | -0.34    | 0.209  | 0.534 NA |        | 0.203  |
| A021982_01 |    | -0.258    | -0.524    | -0.025   | -0.005   | -1.469 | -1.779   | -0.285 | -0.553 |
| A021983_01 |    | -0.363    | -0.434    | 0.048    | -0.261   | 0.353  | 0.123    | -0.021 | -0.217 |
| A021984_01 |    | 0.116     | -0.109    | 0.292    | 0.462    | -0.121 | -0.123   | -0.103 | -0.157 |
| A021986_01 |    | 0.288     | -0.17     | -0.099   | -0.276   | -0.412 | -0.643   | 0.039  | -0.347 |
| A021988_01 |    | -0.163    | 0.019     | 0.042    | -0.198   | 0.361  | 0.543    | 0.156  | 0.266  |
| A021989_01 |    | -0.099    | -0.192    | -0.005   | -0.133   | -0.173 | -0.166   | 0.124  | 0.083  |
| A021990_01 | NA | NA        |           | -0.24 NA | NA       |        | 0.589 NA | NA     |        |
| A021992_01 |    | -0.158    | -0.402    | 0.114    | 0.181    | -1.087 | -1.183   | -0.414 | -0.522 |
| A021993_01 |    | -0.207    | 0.062     | -0.334   | -0.314   | 0.144  | 0.538    | 0.043  | 0.305  |
| A021994_01 |    | 0.191     | -0.251    | -0.114   | -0.221   | -0.841 | -0.861   | -0.191 | -0.157 |
| A021995_01 |    | 0.002     | -0.082    | 0.06     | 0.084    | -0.164 | -0.231   | -0.212 | -0.319 |
| A021997_01 |    | -0.637    | -0.144    | 0.019    | -0.032   | -1.29  | -1.328   | -0.581 | -0.422 |
| A021998_01 |    | -0.577    | -0.549    | -1.243   | -1.037   | -1.793 | -1.876   | -0.874 | -0.698 |
| A021999_01 |    | -0.079    | -0.066    | -0.435   | -0.456   | -0.151 | -0.052   | -0.198 | -0.184 |
| A022000_01 |    | -1.075    | -0.783    | -1.075   | -1.157   | -2.125 | -2.507   | -0.701 | -0.772 |
| A022001_01 |    | -1.773    | -1.378 NA |          | -3.209   | 0.874  | 1.558    | 0.564  | 0.468  |
| A022003_01 |    | -0.067    | 0.04      | -0.185   | -0.181   | 0.038  | 0.119    | -0.02  | -0.09  |
| A022005_01 |    | 0.191     | -0.178    | -0.011   | -0.05    | 0.04   | 0.005    | 0.038  | -0.175 |
| A022006_01 |    | 0.059     | 0.141     | -0.404   | -0.255   | -0.21  | -0.012   | -0.163 | 0.034  |
| A022009_01 |    | -0.229    | -0.223    | -0.248   | -0.005   | -0.869 | -0.871   | -0.519 | -0.587 |
| A022010_01 |    | -0.446    | -0.214    | -0.395   | -0.149   | -1.281 | -1.153   | -0.386 | -0.327 |
| A022011_01 |    | -0.216    | 0.052     | -0.006   | -0.019   | 0.07   | 0.275    | -0.025 | 0.003  |
| A022013_01 |    | -0.097    | 0.49      | 0.048    | -0.177   | 0.159  | 0.168    | 0.109  | 0.295  |
| A022014_01 |    | -0.117    | 0.01      | -0.217   | -0.603   | 0.127  | 0.108    | 0.229  | 0.294  |
| A022015_01 |    | 0.237     | 0.206     | -0.102   | -0.088   | 0.361  | 0.516    | -0.109 | -0.005 |
| A022018_01 |    | -0.265    | -0.271    | -0.229   | -0.037   | -1.13  | -1.038   | -0.202 | -0.295 |
| A022019_01 |    | -0.078    | 0.047     | -0.026   | -0.192   | 0.008  | -0.073   | 0.027  | -0.033 |
| A022020_01 |    | -0.066    | 0.044     | -0.074   | 0.147    | -0.928 | -0.974   | -0.143 | -0.008 |
| A022021_01 |    | -0.845    | -0.37     | -0.468   | -0.271   | -1.218 | -1.069   | -0.682 | -0.363 |
| A022022_01 |    | -0.107    | -0.02     | 0.252    | 0.262    | -0.517 | -0.495   | -0.117 | -0.188 |
| A022024_01 |    | 0.358     | 0.255     | -0.543   | -0.948   | 0.361  | 0.262    | 0.252  | 0.082  |
| A022025_01 |    | 0.009     | -0.067    | -0.076   | 0.022    | -0.113 | -0.101   | -0.083 | -0.184 |
| A022026_01 |    | -0.59     | -0.463    | 0.02     | -0.004   | -1.332 | -1.47    | -0.532 | -0.448 |
| A022027_01 |    | -0.042    | -0.112    | -0.066   | -0.094   | -0.281 | -0.063   | -0.155 | -0.018 |
| A022029_01 |    | -0.181    | 0.243     | -0.016   | -0.124   | 0.106  | 0.273    | -0.114 | 0.017  |
| A022033_01 |    | -0.254    | -0.358    | -0.211   | -0.238   | -0.207 | -0.212   | -0.143 | -0.271 |
| A022034_01 |    | -0.043    | 0.288     | -0.032   | 0.158    | -0.005 | 0.13     | -0.084 | 0.056  |
| A022038_01 |    | 0.032     | 0.196     | -0.087   | 0.119    | 0.123  | 0.219    | 0.04   | 0.077  |
| A022039_01 |    | 0.376     | 0.47      | 0.485    | 0.367    | 0.037  | -0.064   | -0.695 | -0.726 |
| A022040_01 |    | 0.322     | 0.204     | -0.556   | -0.455   | -0.051 | -0.255   | -0.309 | -0.453 |
| A022043_01 |    | -0.404    | -0.122    | 0.069    | 0.066    | -1.082 | -1.208   | -0.22  | -0.045 |
| A022044_01 |    | -0.048    | -0.389    | 0.241    | 0.089    | -1.207 | -1.598   | -0.308 | -0.462 |
| A022045_01 | NA |           | 0.202     | -0.106   | -0.29    | -0.13  | 0.008    | 0.015  | 0.23   |
| A022046_01 |    | 0.05 NA   |           | 0.036    | 0.031 NA |        | -0.963   | -0.194 | -0.151 |
| A022047_01 |    | -0.362    | -0.439    | -0.294   | -0.256   | -1.09  | -1.036   | -0.414 | -0.485 |
| A022048_01 |    | -0.502    | -0.568    | 0.34     | 0.014    | -0.09  | 0.046    | -0.441 | -0.561 |
| A022077_01 |    | -0.146    | 0.154     | -0.008   | -0.164   | 0.393  | 0.836    | 0.067  | 0.296  |
| A022102_01 |    | 0.131     | -0.291    | 0.623    | 0.345    | 0.912  | 0.936    | 0.219  | -0.015 |
| A022105_01 |    | 0.69      | 0.947     | 0.204    | -0.021   | 0.513  | 0.644 NA |        | 0.035  |
| A022107_01 |    | -0.378    | -0.338    | -0.305   | -0.18    | -1     | -1.319   | -0.073 | -0.325 |
| A022112_01 |    | 0.312     | 0.246     | -0.095   | -0.434   | 0.47   | 0.762    | -0.148 | 0.203  |
| A022113_01 |    | -0.34     | 0.168     | 0.157    | 0.112    | 0.146  | 0.208    | -0.209 | -0.001 |
| A022117_01 |    | 0.161     | 0.028     | 0.19     | 0.061    | 0.164  | 0.025    | -0.065 | -0.144 |

|            |           |        |           |           |        |           |           |        |
|------------|-----------|--------|-----------|-----------|--------|-----------|-----------|--------|
| A022118_01 | -0.05     | 0.117  | -0.199    | -0.202    | 0.041  | 0.227     | 0.049     | 0.229  |
| A022120_01 | -0.134    | -0.038 | 0.106     | -0.026    | -0.178 | -0.053    | -0.236    | -0.145 |
| A022121_01 | 0.017     | 0.011  | 0.333     | 0.4       | -0.05  | 0.186     | -0.345    | -0.209 |
| A022125_01 | -0.083 NA |        | 0.191     | 0.012     | 0.136  | 0.198 NA  | NA        |        |
| A022126_01 | 0.095     | 0.051  | -0.751    | -0.796    | 0.091  | 0.06      | -0.115    | -0.34  |
| A022130_01 | -0.049    | -0.084 | -0.048    | -0.131    | 0.103  | 0.115     | -0.053    | -0.032 |
| A022138_01 | 0.152     | 0.195  | 0.012     | -0.264    | 0.205  | 0.147     | 0.011     | 0.013  |
| A022140_01 | 0.014     | 0.104  | -0.02     | -0.25     | 0.217  | 0.369     | 0.181 NA  |        |
| A022156_01 | 0.189     | 0.2    | 0.186     | -0.334    | 0.202  | 0.103 NA  |           | -0.074 |
| A022163_01 | 0.014     | 0.057  | -0.085    | -0.013    | -0.189 | -0.069    | -0.159    | -0.291 |
| A022164_01 | -0.198    | 0.066  | 0.098     | -0.076    | -0.846 | -1.047    | -0.093 NA |        |
| A022171_01 | -0.226    | -0.18  | -0.246    | -0.213    | -0.236 | -0.14     | 0.094     | 0.198  |
| A022183_01 | 0.182     | 0.107  | -0.016    | -0.055    | 0.003  | -0.067    | 0.034     | -0.145 |
| A022196_01 | 0.149     | -0.142 | 0.03      | -0.127    | -0.018 | -0.382    | 0.394     | 0.015  |
| A022202_01 | -0.246    | -0.369 | -0.086    | -0.139    | -0.47  | -0.517    | -0.424    | -0.486 |
| A022215_01 | 0.049     | -0.094 | 0.177     | 0.161     | 0.24   | 0.298     | 0.129     | 0.026  |
| A022218_01 | 0.095 NA  |        | 0.058     | -0.164    | -0.058 | -0.236    | 0.221     | -0.019 |
| A022230_01 | 0.065     | 0.03   | -0.016    | -0.111    | 0.02   | -0.116 NA |           | -0.098 |
| A022248_01 | 0.22 NA   |        | 0.14      | 0.055     | -0.013 | -0.068 NA |           | -0.25  |
| A022267_01 | 0.032 NA  |        | 0.422     | 0.154     | -0.412 | -0.782 NA |           | -0.475 |
| A022269_01 | 0.137     | -0.183 | -0.002    | 0.013     | 0.396  | 0.521     | 0.168     | -0.015 |
| A022275_01 | 0.303     | 0.395  | 0.233     | 0.201     | -0.031 | -0.194    | -0.327    | -0.283 |
| A022279_01 | 0.079     | -0.049 | -0.145    | -0.055    | -0.015 | 0.033     | 0.033     | -0.067 |
| A022282_01 | -0.434    | -0.552 | -0.048    | -0.368    | -0.726 | -0.692 NA | NA        |        |
| A022283_01 | 0.242     | -0.147 | 0.237     | 0.028     | 0.396  | 0.434 NA  |           | -0.034 |
| A022300_01 | 0.27 NA   |        | -0.047 NA | NA        |        | -0.388 NA | NA        |        |
| A022304_01 | 0.291     | 0.055  | 0.386     | 0.046     | 0.472  | 0.451 NA  | NA        |        |
| A022306_01 | -0.188    | -0.07  | -0.153    | -0.319    | 0.463  | 0.526     | 0.39      | 0.479  |
| A022311_01 | 0.409 NA  |        | 0.71      | 0.371     | 0.281  | 0.174     | 0.126     | 0.031  |
| A022316_01 | 0.035 NA  |        | 0.194     | -0.161    | 0.282  | 0.182     | -0.004    | -0.053 |
| A022324_01 | 0.674     | 1.052  | 0.12      | 0.012     | 0.175  | 0.023     | -0.244    | -0.182 |
| A022328_01 | -0.031    | -0.067 | -0.388    | -0.356    | -0.299 | -0.143    | 0.038     | 0.001  |
| A022329_01 | 0.245 NA  | NA     |           | -0.594 NA |        | -0.231 NA |           | -0.401 |
| A022339_01 | 0.334 NA  |        | -0.402    | -0.306    | -0.021 | -0.166    | 0.294     | -0.016 |
| A022358_01 | -0.118    | -0.006 | 0.217     | 0.151     | 0.628  | 0.802     | 0.14      | 0.13   |
| A022365_01 | 0.3 NA    |        | -0.135    | -0.123    | 0.221  | 0.144     | 0.111     | 0.052  |
| A022367_01 | 0.025     | 0.031  | -0.058    | -0.142    | 0.007  | 0.034 NA  |           | -0.014 |
| A022377_01 | 0.095     | -0.004 | -0.163    | -0.187    | 0.272  | 0.335     | 0.145     | 0.098  |
| A022381_01 | 0.331     | -0.068 | -0.069    | -0.251    | -0.287 | -0.508    | -0.066    | -0.388 |
| A022386_01 | 0.266     | 0.095  | 0.06      | -0.257    | 0.195  | -0.089    | 0.356     | 0.054  |
| A022394_01 | -0.522    | -0.291 | -0.095    | -0.116    | -0.597 | -0.78     | -0.09     | -0.149 |
| A022401_01 | 0.756     | 0.709  | -0.186    | 0.08      | 0.659  | 0.706     | 0.401     | 0.43   |
| A022405_01 | 0.535     | 0.155  | -0.16     | -0.223    | 0.407  | 0.379     | 0.308     | 0.032  |
| A022406_01 | -0.029 NA |        | 0.361     | -0.046    | -0.308 | -0.601    | 0.109     | -0.023 |
| A022410_01 | 0.172 NA  |        | 0.061 NA  | NA        |        | 0.296 NA  | NA        |        |
| A022417_01 | -0.246    | -0.001 | 0.187     | 0.156     | 0.04   | 0.236     | -0.058    | 0.005  |
| A022434_01 | 0.147 NA  |        | 0.052     | -0.049 NA |        | 0.003     | 0.065     | -0.053 |
| A022436_01 | -0.214    | -0.096 | -0.122    | -0.352    | 0.636  | 0.768     | 0.025     | 0.026  |
| A022444_01 | 0.403     | 0.306  | 0.02      | -0.026    | 0.055  | -0.154 NA |           | -0.237 |
| A022447_01 | 0.032 NA  |        | 0.027     | 0.047     | 0.195  | 0.428     | -0.053    | 0.122  |
| A022451_01 | -0.027 NA | NA     | NA        |           | 0.022  | 0.061 NA  | NA        |        |
| A022457_01 | 0.17 NA   |        | -0.16     | -0.386    | 0.077  | -0.143    | 0.209     | -0.052 |
| A022479_01 | 0.262     | 0.109  | 0.205     | -0.206    | 0.134  | 0.063 NA  |           | -0.005 |
| A022485_01 | 0.591 NA  |        | 0.308     | 0.386 NA  |        | -0.147 NA |           | -0.31  |
| A022486_01 | 0.13 NA   |        | 0.4       | 0.024 NA  | NA     | NA        |           | -0.345 |
| A022488_01 | 0.263     | 0.046  | 0.135     | 0.081     | -0.085 | -0.25     | 0.091     | -0.196 |
| A022495_01 | 0.107     | -0.096 | 0.118     | 0.018     | 0.095  | 0.025     | 0.095 NA  |        |
| A022502_01 | 0.247     | 0.119  | 0.225     | -0.29     | 0.152  | 0.139     | 0.124     | -0.037 |
| A022509_01 | -0.064    | -0.131 | 0.166     | 0.063     | -0.067 | -0.169    | 0.009     | -0.073 |
| A022534_01 | 0.135     | -0.166 | 0.284     | 0.009     | -0.225 | -0.488    | 0.061     | -0.247 |
| A022541_01 | 0.008     | 0.083  | 0.583     | 0.392     | 0.172  | 0.044     | -0.28     | -0.163 |
| A022543_01 | 0.138     | -0.075 | 0.006     | -0.031    | -0.013 | 0.104     | 0.234     | 0.12   |
| A022546_01 | -0.028 NA |        | 0.24 NA   |           | -0.36  | -0.608 NA | NA        |        |
| A022551_01 | 0.429     | 0.481  | 0.388     | 0.054     | 0.472  | 0.331     | -0.042    | -0.088 |
| A022555_01 | 0.145     | 0.068  | -0.022    | -0.089    | 0.04   | 0.069     | 0.145     | -0.123 |
| A022556_01 | 0.057     | 0.019  | 0.1       | 0.029     | 0.278  | 0.603     | -0.127    | -0.153 |
| A022560_01 | 0.12      | -0.098 | -0.024    | -0.135    | -0.063 | -0.127 NA | NA        |        |
| A022565_01 | 0.109     | -0.334 | -0.072    | -0.402    | 0.119  | 0.142     | 0.188     | 0.014  |

|            |    |        |        |        |        |        |        |        |    |        |
|------------|----|--------|--------|--------|--------|--------|--------|--------|----|--------|
| A022569_01 | NA | NA     |        | 0.25   | -0.105 | 0.246  | NA     | NA     |    | -0.077 |
| A022570_01 |    | -0.132 | 0.061  | 0.643  | 0.377  | 0.73   | 1.027  | -0.582 |    | -0.219 |
| A022571_01 |    | 0.159  | NA     | 0.167  | 0.002  | 0.512  | 0.569  | 0.109  |    | 0.012  |
| A022583_01 |    | 0.314  | 0.74   | 0.382  | -0.016 | 0.233  | 0.258  | -0.333 |    | -0.034 |
| A022592_01 |    | 0.167  | 0.065  | 0.116  | -0.182 | 0.262  | 0.227  | -0.039 |    | 0.053  |
| A022599_01 |    | 0.362  | 0.232  | 0.064  | NA     | 0.333  | 0.346  | NA     | NA |        |
| A022600_01 |    | 0.027  | 0.053  | -0.345 | -0.322 | -0.099 | -0.167 | 0.044  |    | 0.13   |
| A022619_01 |    | 0.485  | 0.371  | 0.404  | 0.158  | 0.56   | 0.663  | NA     | NA |        |
| A022624_01 |    | -0.124 | -0.08  | NA     | NA     | 0.571  | 0.531  | NA     | NA |        |
| A022627_01 |    | 0.186  | 0.056  | 0.22   | -0.02  | 0.104  | -0.024 | -0.041 |    | -0.134 |
| A022634_01 |    | 0.347  | 0.1    | 0.094  | 0.057  | 0.257  | 0.183  | 0.044  |    | -0.196 |
| A022635_01 |    | -0.461 | -0.316 | 0.4    | 0.104  | -0.002 | -0.08  | -0.244 |    | -0.438 |
| A022637_01 |    | 0.205  | 0.142  | -0.16  | -0.098 | 0.33   | 0.391  | 0.307  |    | 0.13   |
| A022643_01 |    | 0.15   | -0.156 | 0.384  | 0.295  | 0.902  | 1.15   | 0.524  |    | 0.221  |
| A022657_01 |    | -0.193 | -0.22  | -0.339 | -0.324 | 0.305  | 0.606  | -0.019 |    | 0.04   |
| A022664_01 |    | 0.046  | NA     | -0.078 | 0.017  | 0.14   | 0.019  | NA     |    | -0.097 |
| A022666_01 |    | 0.231  | NA     | 0.184  | -0.019 | 0.123  | 0.099  | 0.08   |    | 0.028  |
| A022671_01 |    | 0.086  | -0.205 | 0.025  | -0.243 | 0.19   | 0.095  | 0.19   |    | -0.134 |
| A022689_01 |    | -0.473 | NA     | -0.246 | -0.186 | -0.209 | -0.227 | -0.552 |    | -0.621 |
| A022702_01 |    | -0.108 | -0.302 | 0.355  | 0.05   | 0.043  | -0.078 | -0.167 |    | -0.264 |
| A022705_01 |    | -0.078 | NA     | -0.089 | -0.135 | 0.243  | 0.116  | 0.217  |    | -0.056 |
| A022708_01 |    | 0.129  | NA     | 0.065  | -0.066 | NA     | -0.052 | 0.3    |    | 0.001  |
| A022729_01 |    | 0.328  | NA     | 0.492  | 0.548  | 0.293  | 0.557  | 0.357  |    | 0.236  |
| A022731_01 |    | -0.272 | NA     | NA     | NA     | NA     | -0.077 | NA     | NA |        |
| A022735_01 |    | 0.289  | 0.109  | 0.77   | 0.713  | 0.729  | 0.896  | -0.283 |    | -0.173 |
| A022749_01 |    | -0.04  | NA     | 0.027  | -0.104 | -0.289 | -0.428 | NA     |    | -0.36  |
| A022755_01 |    | 0.134  | 0.224  | -0.033 | NA     | 0.041  | 0.058  | -0.068 |    | -0.051 |
| A022764_01 |    | -0.075 | NA     | NA     | -0.381 | 0.374  | 0.261  | 0.419  |    | 0.238  |
| A022765_01 |    | -0.009 | -0.103 | -0.08  | -0.093 | -0.031 | -0.109 | 0.212  |    | -0.061 |
| A022779_01 |    | -0.198 | -0.426 | -0.099 | -0.078 | 0.122  | 0.091  | 0.057  |    | -0.268 |
| A022781_01 |    | 0.324  | 0.372  | 0.031  | 0.096  | 0.079  | 0.136  | 0.15   |    | 0.106  |
| A022790_01 |    | -0.188 | -0.151 | 0.163  | 0.057  | -0.187 | -0.356 | -0.286 |    | -0.416 |
| A022796_01 |    | 0.119  | -0.058 | -0.078 | -0.027 | -0.079 | 0.042  | -0.025 |    | -0.02  |
| A022801_01 |    | -0.105 | NA     | NA     | -0.172 | -0.076 | -0.126 | NA     |    | -0.359 |
| A022804_01 |    | 0.274  | 0.279  | -0.186 | -0.092 | 0.116  | 0.302  | -0.025 |    | -0.085 |
| A022808_01 |    | 0.172  | NA     | -0.111 | -0.195 | NA     | NA     | 0.224  |    | 0.131  |
| A022817_01 |    | 0.187  | 0.012  | 0.268  | -0.02  | 0.174  | 0.113  | NA     | NA |        |
| A022821_01 | NA | NA     | NA     | NA     | NA     | NA     | NA     | NA     |    | -2.264 |
| A022839_01 |    | 0.252  | NA     | 0.47   | 0.124  | 0.031  | 0.047  | -0.257 |    | -0.207 |
| A022844_01 |    | -0.278 | -0.322 | 0.174  | -0.108 | -0.869 | -1.266 | -0.243 |    | -0.37  |
| A022850_01 |    | 0.045  | 0.508  | -0.105 | NA     | -0.064 | -0.042 | NA     | NA |        |
| A022862_01 |    | 0.07   | 0.242  | 0.443  | 0.493  | -0.486 | -0.524 | NA     | NA |        |
| A022865_01 |    | 0.064  | 0.012  | 0.213  | 0.159  | -0.242 | -0.137 | NA     | NA |        |
| A022874_01 |    | 0.108  | 0.249  | 0.146  | 0.303  | 0.125  | 0.173  | -0.009 |    | -0.148 |
| A022882_01 |    | -0.31  | -0.22  | -0.223 | -0.169 | -0.643 | -0.716 | -0.053 |    | -0.032 |
| A022901_01 |    | 0.458  | 0.111  | NA     | NA     | 0.309  | 0.438  | NA     |    | 0.166  |
| A022911_01 |    | 0.257  | 0.272  | -0.079 | -0.184 | 0.046  | 0.086  | -0.21  |    | -0.04  |
| A022916_01 |    | 0.027  | NA     | NA     | NA     | 0.212  | 0.174  | NA     | NA |        |
| A022919_01 |    | -0.467 | -0.437 | 0.033  | -0.014 | -1.116 | -1.221 | -0.436 |    | -0.347 |
| A022922_01 |    | 0.003  | -0.058 | -0.23  | -0.307 | -0.16  | -0.208 | 0.111  |    | 0.03   |
| A022927_01 |    | 0.259  | 0.144  | -0.013 | 0.084  | 0.155  | 0.282  | -0.004 |    | 0.08   |
| A022948_01 |    | 0.101  | 0.246  | 0.006  | -0.275 | 0.392  | 0.52   | -0.563 |    | -0.555 |
| A022952_01 |    | 0.011  | -0.063 | -0.077 | -0.338 | -0.062 | -0.055 | -0.058 |    | -0.099 |
| A022967_01 |    | -0.197 | NA     | NA     | -0.311 | -0.337 | -0.457 | NA     | NA |        |
| A022968_01 |    | -0.386 | -0.408 | 0.016  | -0.012 | -0.258 | -0.45  | 0.072  |    | -0.234 |
| A022972_01 |    | 0.119  | -0.194 | NA     | -0.456 | -0.049 | -0.07  | NA     |    | 0.008  |
| A022975_01 |    | 0.207  | 0.058  | 0.361  | 0.14   | 0.301  | 0.156  | 0.197  |    | 0.098  |
| A022983_01 | NA | NA     | NA     | -0.077 | -0.027 | NA     | -0.103 | 0.214  |    | 0.04   |
| A022984_01 |    | 0.25   | NA     | 0.097  | -0.081 | -0.37  | -0.862 | -0.005 |    | -0.382 |
| A022987_01 |    | 0.025  | 0.478  | 0.096  | 0.081  | 0.275  | 0.381  | 0.337  |    | 0.563  |
| A022990_01 |    | -0.277 | -0.571 | -0.498 | -0.589 | -1.027 | -1.057 | NA     |    | -0.953 |
| A022991_01 |    | 0.336  | NA     | 0.356  | -0.132 | NA     | NA     | NA     |    | -0.142 |
| A022993_01 |    | -0.044 | -0.18  | 0.196  | 0.13   | 0.251  | 0.384  | 0.111  |    | 0.083  |
| A022996_01 |    | -0.179 | NA     | NA     | NA     | 0.245  | 0.417  | NA     |    | -0.202 |
| A022999_01 |    | -0.694 | NA     | -0.507 | NA     | -0.374 | -0.645 | NA     | NA |        |
| A023023_01 |    | 0.208  | 0.002  | 0.12   | -0.09  | 0.173  | 0.115  | -0.002 |    | -0.162 |
| A023027_01 |    | 0.019  | -0.172 | -0.023 | -0.308 | 0.488  | 0.343  | -0.079 |    | -0.188 |
| A023029_01 |    | -0.189 | NA     | 0.328  | 0.27   | 0.425  | 0.604  | 0.142  |    | -0.053 |



|            |        |        |        |        |        |        |        |        |
|------------|--------|--------|--------|--------|--------|--------|--------|--------|
| A023030_01 | -0.026 | NA     | 0.556  | 0.6    | NA     | 0.441  | 0.106  | -0.232 |
| A023035_01 | 0.06   | NA     | 0.067  | NA     | 0.241  | 0.342  | NA     | NA     |
| A023040_01 | -0.026 | NA     | NA     | NA     | -0.049 | -0.233 | NA     | NA     |
| A023041_01 | -0.202 | -0.456 | -0.044 | -0.216 | 0.04   | -0.043 | 0.123  | -0.256 |
| A023043_01 | 0.558  | NA     | 0.294  | -0.066 | 0.232  | NA     | NA     | -0.265 |
| A023045_01 | 0.084  | -0.137 | 0.008  | -0.131 | 0.351  | 0.468  | 0.128  | -0.095 |
| A023054_01 | 0.039  | 0.303  | 0.029  | -0.143 | NA     | 0.216  | -0.387 | -0.047 |
| A023061_01 | 0.237  | NA     | NA     | NA     | -0.118 | -0.245 | NA     | NA     |
| A023066_01 | -0.012 | -0.099 | -0.225 | -0.115 | -0.246 | -0.125 | -0.13  | -0.199 |
| A023075_01 | -0.493 | -0.258 | -0.08  | -0.209 | -0.167 | -0.167 | -0.013 | 0.063  |
| A023079_01 | -1.428 | NA     | -0.83  | NA     | -1.655 | -2.008 | NA     | -0.764 |
| A023080_01 | 0.314  | 0.054  | 0.202  | 0.127  | 0.166  | -0.106 | 0.016  | -0.114 |
| A023089_01 | 0.253  | NA     | NA     | NA     | -0.019 | -0.021 | NA     | NA     |
| A023091_01 | 0.124  | NA     | -0.68  | -0.641 | NA     | NA     | NA     | 0.034  |
| A023102_01 | 0.03   | NA     | -0.201 | NA     | NA     | -0.162 | NA     | NA     |
| A023109_01 | 0.084  | -0.077 | -0.341 | -0.299 | -0.125 | -0.279 | 0.149  | 0.01   |
| A023113_01 | -0.229 | -0.138 | 0.009  | 0.007  | 0.045  | -0.047 | 0.154  | 0.159  |
| A023114_01 | 0.617  | 0.606  | 0.911  | 0.678  | 0.38   | 0.629  | 0.145  | -0.12  |
| A023119_01 | 0.092  | -0.119 | 0.294  | 0.074  | 0.191  | -0.042 | 0.342  | 0.045  |
| A023126_01 | 0.228  | -0.005 | 0.072  | -0.043 | 0.157  | 0.095  | 0.234  | 0.125  |
| A023130_01 | -0.094 | NA     | -0.431 | NA     | -0.306 | -0.201 | NA     | NA     |
| A023136_01 | 0.192  | 0.228  | 0.136  | 0.16   | 0.116  | 0.069  | -0.042 | -0.205 |
| A023137_01 | -0.096 | -0.053 | 0.016  | 0.045  | -0.875 | -0.948 | -0.233 | -0.267 |
| A023138_01 | 0.436  | 0.437  | NA     | NA     | 0.006  | 0.222  | NA     | NA     |
| A023148_01 | 0.007  | 0.072  | -0.035 | -0.071 | 0.207  | 0.212  | 0.226  | 0.143  |
| A023158_01 | -0.288 | NA     | 0.545  | 0.245  | 0.211  | 0.184  | NA     | NA     |
| A023159_01 | -0.07  | 0.086  | -0.128 | -0.124 | 0.056  | 0.161  | -0.381 | -0.323 |
| A023163_01 | 0.191  | NA     | NA     | -0.239 | -0.052 | -0.417 | NA     | -0.099 |
| A023177_01 | -0.138 | -0.338 | -0.009 | -0.217 | -0.084 | -0.068 | 0.004  | 0.008  |
| A023183_01 | -0.023 | -0.001 | 0.147  | 0.079  | -0.034 | -0.23  | -0.002 | -0.182 |
| A023185_01 | 0.64   | 0.264  | -0.001 | -0.087 | 0.325  | 0.159  | 0.11   | -0.015 |
| A023186_01 | 0.022  | -0.214 | 0.193  | -0.049 | -0.141 | -0.368 | 0.237  | 0.027  |
| A023188_01 | -0.089 | NA     | 0.107  | -0.012 | -0.089 | -0.208 | 0.092  | 0.179  |
| A023198_01 | -0.375 | NA     | 0.243  | NA     | -0.361 | -0.531 | NA     | NA     |
| A023199_01 | -0.444 | NA     | 0.128  | -0.238 | 0.838  | 1.075  | NA     | -0.009 |
| A023202_01 | 0.038  | NA     | 0.365  | 0.281  | -0.294 | -0.533 | -0.06  | -0.126 |
| A023223_01 | 0.269  | NA     | 0.153  | -0.019 | NA     | NA     | 0.178  | -0.014 |
| A023228_01 | 0.335  | 0.216  | -0.058 | -0.126 | 0.188  | 0.264  | 0.09   | -0.022 |
| A023230_01 | 0.01   | -0.01  | 0.24   | 0.198  | 0.26   | 0.205  | -0.081 | -0.06  |
| A023232_01 | 0.304  | 0.239  | 0.159  | 0.077  | -0.374 | -0.475 | NA     | NA     |
| A023237_01 | -0.645 | 0.126  | NA     | -0.032 | 0.069  | 0.045  | NA     | NA     |
| A023239_01 | 0.039  | NA     | 0.356  | 0.141  | 0.55   | 0.421  | -0.055 | -0.236 |
| A023241_01 | 0.025  | -0.04  | -0.138 | -0.138 | 0.162  | 0.23   | 0.024  | -0.009 |
| A023242_01 | 0.869  | 0.819  | 0.07   | -0.052 | -0.015 | -0.33  | 0.103  | 0.042  |
| A023250_01 | -0.385 | 0.084  | 0.069  | -0.119 | 0.024  | 0.425  | -0.269 | 0.226  |
| A023252_01 | 0.2    | -0.282 | 0.892  | 0.732  | 0.951  | 1.137  | 0.48   | 0.175  |
| A023259_01 | -0.018 | -0.151 | -0.043 | -0.29  | 0.251  | 0.054  | 0.166  | 0.024  |
| A023272_01 | -0.277 | -0.279 | -0.552 | -0.334 | 0.067  | 0.323  | -0.124 | 0.01   |
| A023277_01 | -0.172 | -0.082 | -0.115 | -0.267 | 0.758  | 0.906  | 0.326  | 0.272  |
| A023279_01 | 0.032  | -0.02  | -0.37  | -0.545 | -0.31  | -0.528 | 0.02   | -0.233 |
| A023283_01 | 0.244  | 0.352  | NA     | 0.314  | -0.097 | 0.021  | NA     | NA     |
| A023287_01 | 0.585  | NA     | 0.432  | 0.057  | NA     | NA     | NA     | -0.348 |
| A023290_01 | 0.247  | NA     | NA     | -0.301 | 0.116  | -0.117 | 0.286  | -0.111 |
| A023297_01 | -0.229 | -0.546 | NA     | -0.724 | -0.46  | -0.826 | NA     | NA     |
| A023312_01 | 0.115  | 0.044  | -0.147 | -0.374 | 0.325  | 0.329  | NA     | 0.04   |
| A023324_01 | -0.074 | -0.059 | 0.198  | 0.271  | -0.294 | -0.132 | -0.76  | -0.699 |
| A023329_01 | 0.48   | 0.144  | 0.059  | -0.258 | 0.398  | 0.343  | NA     | -0.046 |
| A023335_01 | -0.309 | NA     | 0.576  | 0.399  | 0      | 0.084  | NA     | NA     |
| A023339_01 | 0.109  | 0.109  | 0.041  | 0.012  | -0.153 | -0.103 | -0.088 | 0.131  |
| A023346_01 | 0.117  | NA     | NA     | NA     | 0.038  | 0.059  | NA     | 0.186  |
| A023347_01 | 0.036  | NA     | -0.107 | -0.173 | -0.803 | -1.073 | -0.009 | -0.204 |
| A023348_01 | NA     | NA     | 0.303  | 0.02   | 0.312  | 0.287  | 0.264  | 0.059  |
| A023353_01 | 0.365  | 0.227  | -0.005 | -0.073 | 0.342  | 0.384  | 0.129  | 0.14   |
| A023354_01 | 0.41   | 0.399  | 0.356  | 0.145  | 0.617  | 0.653  | 0.207  | 0.183  |
| A023363_01 | -0.216 | -0.31  | 0.1    | -0.04  | -0.343 | -0.42  | -0.198 | -0.134 |
| A023376_01 | 0.037  | NA     | -0.031 | -0.345 | NA     | NA     | -0.433 | -0.599 |
| A023378_01 | 0.155  | 0.197  | -0.043 | -0.104 | -0.17  | -0.318 | 0.053  | 0.048  |
| A023386_01 | 0.09   | 0.047  | -0.094 | -0.043 | 0.083  | 0.141  | 0.107  | -0.002 |

|            |           |           |           |           |        |           |           |        |
|------------|-----------|-----------|-----------|-----------|--------|-----------|-----------|--------|
| A023389_01 | -0.158 NA |           | 0         | -0.166 NA | NA     |           | -0.15     | 0.244  |
| A023404_01 | 0.401     | 0.343     | 0.336     | 0.116     | 0.654  | 0.666 NA  | NA        |        |
| A023424_01 | 0.308     | 0.394     | 0.281     | 0.13      | 0.498  | 0.579     | -0.08     | -0.095 |
| A023428_01 | -0.365 NA |           | 0.098     | 0.008 NA  |        | -0.221    | 0.078     | 0.003  |
| A023431_01 | -0.254 NA |           | 0.471     | 0.197     | 0.145  | 0.397 NA  |           | 0.17   |
| A023433_01 | 0.114 NA  |           | 0.157     | -0.358    | 0.394  | 0.582 NA  |           | 0.024  |
| A023440_01 | 0.221     | -0.121    | -0.257    | -0.164    | 0.319  | 0.478     | 0.092     | -0.033 |
| A023441_01 | 0.218 NA  |           | 0.041 NA  |           | 0.421  | 0.409 NA  |           | -0.023 |
| A023443_01 | 0.283 NA  |           | -0.109    | -0.198 NA |        | 0.115     | 0.267     | 0.208  |
| A023453_01 | -0.013    | 0.008     | -0.121    | -0.004    | 0.087  | 0.151     | 0.086     | 0.226  |
| A023457_01 | -0.192    | -0.153    | 0.236     | 0.083     | -1.002 | -1.098    | -0.377    | -0.351 |
| A023470_01 | 0.063     | 0.069     | 0.056     | -0.03     | 0.002  | -0.014    | -0.009 NA |        |
| A023473_01 | -0.048 NA |           | 0.315     | 0.027 NA  | NA     |           | -0.114    | -0.266 |
| A023476_01 | -0.291    | -0.396    | -0.021    | -0.019    | -0.446 | -0.515    | -0.513 NA |        |
| A023491_01 | 0.246     | 0.192     | 0.212     | -0.093    | 0.589  | 0.65      | -0.078    | -0.199 |
| A023504_01 | 0.296     | 0.235     | -0.089    | -0.191    | 0.144  | 0.206 NA  |           | -0.208 |
| A023507_01 | -0.635    | -0.284    | -0.013    | -0.016    | 0.185  | 0.51      | -0.074    | 0.36   |
| A023523_01 | 0.468     | 0.059     | -0.143    | -0.275    | 0.369  | 0.485     | 0.059     | -0.109 |
| A023537_01 | 0.498 NA  |           | 0.233     | 0.169     | -0.444 | -0.573    | -0.331    | -0.377 |
| A023546_01 | 0.005     | -0.318    | 0.153     | -0.117    | -0.261 | -0.655    | 0.371     | 0.06   |
| A023566_01 | -0.08     | -0.091    | -0.179    | -0.351    | -0.582 | -0.656    | -0.462    | -0.36  |
| A023589_01 | 0.118     | -0.057    | 0.103     | -0.063    | 0.066  | 0.037     | 0.12      | -0.095 |
| A023607_01 | NA        | -0.075 NA | NA        | NA        |        | 0.164 NA  | NA        |        |
| A023609_01 | 0.067     | 0.294     | 0.131     | -0.048    | 0.061  | -0.03     | 0.017 NA  |        |
| A023620_01 | 0.128     | 0.31      | -0.079    | -0.185    | 0.233  | 0.498     | -0.131    | 0.07   |
| A023621_01 | 0.038     | 0.133     | 0.065     | -0.297    | 0.263  | 0.141     | 0.123     | 0.027  |
| A023622_01 | -0.091 NA | NA        |           | -0.044 NA |        | -0.151 NA |           | -0.132 |
| A023623_01 | -0.078    | -0.192    | 0.031     | 0.041     | 0.017  | -0.237    | -0.136    | -0.544 |
| A023629_01 | -0.179 NA |           | 0.11      | -0.066 NA |        | -0.131 NA | NA        |        |
| A023630_01 | 0.048 NA  |           | -0.079    | -0.043 NA |        | 0.12 NA   |           | 0.157  |
| A023652_01 | 0.293     | 0.205     | 0.361 NA  |           | 0.185  | 0.113 NA  | NA        |        |
| A023658_01 | 0.357 NA  |           | 0.278     | 0.327 NA  |        | -0.436    | 0.052     | -0.172 |
| A023665_01 | 0.272     | 0.127     | -0.163    | -0.08     | 0.075  | -0.049    | -0.02     | -0.048 |
| A023672_01 | -0.123    | -0.127    | -0.243    | -0.367    | -0.16  | 0.047     | 0.058     | -0.048 |
| A023685_01 | 0.698 NA  |           | 0.308     | 0.081 NA  | NA     | NA        |           | -0.172 |
| A023689_01 | 0.203     | 0.218 NA  |           | -0.183    | 0.261  | 0.339 NA  | NA        |        |
| A023712_01 | 0.137     | 0.352     | 0.337     | 0.227     | -0.28  | -0.463    | -0.205    | -0.078 |
| A023721_01 | 0.07      | 0.107     | 1.091     | 0.74      | 1.203  | 1.484     | 0.241     | 0.26   |
| A023735_01 | 0.017 NA  | NA        |           | -0.336    | 0.055  | -0.141 NA |           | -0.178 |
| A023745_01 | 0.563     | 0.216     | 0.315     | 0.063     | -0.257 | -0.637    | -0.026    | -0.275 |
| A023754_01 | -0.258    | -0.165    | -0.109    | -0.104    | -0.102 | 0.002     | -0.069    | 0.036  |
| A023756_01 | -0.102    | -0.054    | -0.424    | -0.282    | 0.111  | 0.186     | -0.208    | -0.222 |
| A023760_01 | -0.242    | -0.311    | 0.136     | -0.155    | 0.255  | 0.226     | -0.154    | -0.045 |
| A023776_01 | 0.365 NA  |           | 0.172     | 0.107 NA  |        | -0.628    | 0.21      | -0.058 |
| A023797_01 | 0.505     | 0.494     | -0.082    | 0.044     | 0.262  | 0.331     | 0.058     | 0.026  |
| A023802_01 | 0.151     | 0.2 NA    | NA        |           | 0.147  | 0.393 NA  | NA        |        |
| A023806_01 | 0.008 NA  |           | 0.467     | -0.032 NA | NA     | NA        |           | -0.164 |
| A023808_01 | 0.065     | -0.153    | -0.169    | -0.213    | 0.193  | 0.255     | -0.064    | -0.094 |
| A023814_01 | -0.27     | 0.289     | -0.215    | -0.159    | 0.25   | 0.528     | -0.058    | 0.217  |
| A023818_01 | -0.529 NA |           | -0.596    | -0.486 NA | NA     |           | -0.557    | -0.643 |
| A023824_01 | -0.149    | -0.175    | 0.184     | 0.091     | -0.488 | -0.635    | -0.118    | -0.216 |
| A023852_01 | 0.295     | 0.086     | -0.026 NA |           | 0.228  | 0.019 NA  | NA        |        |
| A023870_01 | 0.009     | -0.006    | 0.321     | 0.163     | 0.158  | 0.325     | 0.054     | -0.063 |
| A023876_01 | 0.072 NA  |           | 0.334     | 0.093     | -0.186 | -0.321 NA |           | -0.079 |
| A023896_01 | 0.114     | 0.003     | -0.395    | -0.407    | 0.066  | 0.178 NA  | NA        |        |
| A023897_01 | -0.07     | -0.029    | -0.07     | -0.077    | -0.002 | 0.109     | -0.093    | 0.162  |
| A023902_01 | -0.106    | -0.143    | -0.265    | -0.23     | 0.198  | 0.262 NA  | NA        |        |
| A023904_01 | 0.344     | 0.447     | -0.185    | -0.123    | -0.618 | -0.719    | 0.223     | 0.454  |
| A023913_01 | -0.22     | -0.414    | 0.148     | 0.176     | -0.68  | -0.677 NA |           | -0.876 |
| A023941_01 | -0.311 NA |           | 0.114     | -0.153 NA | NA     |           | -0.205    | 0.166  |
| A023943_01 | 0.031     | -0.311    | 0.059     | 0.085     | 0.407  | 0.434     | 0.205     | 0.128  |
| A023982_01 | -0.288 NA |           | 0.109 NA  | NA        | NA     | NA        |           | -0.135 |
| A023987_01 | 0.393 NA  |           | -0.068    | -0.29 NA  |        | -0.365    | 0.271     | -0.026 |
| A023993_01 | 0.191     | 0.034     | -0.121    | -0.004    | -0.449 | -0.454    | -0.154    | -0.337 |
| A023994_01 | 0.184 NA  |           | 0.519     | 0.279     | -0.007 | -0.06 NA  | NA        |        |
| A023999_01 | 0.153 NA  |           | 0.272 NA  |           | -0.101 | -0.351 NA | NA        |        |
| A024001_01 | 0.219 NA  | NA        |           | 0.013 NA  |        | -0.524 NA |           | -0.237 |
| A024024_01 | 0.126     | -0.064    | 0.114     | -0.172    | -0.087 | 0.044     | -0.244    | -0.11  |

|            |           |          |           |           |        |           |          |        |
|------------|-----------|----------|-----------|-----------|--------|-----------|----------|--------|
| A024026_01 | 0.152     | -0.148   | 0.351     | 0.289     | 0.637  | 0.825     | -0.078   | -0.277 |
| A024027_01 | 0.023 NA  |          | 0.146     | -0.043 NA |        | 0.309     | 0.277    | 0.141  |
| A024030_01 | 0.16 NA   |          | -0.047 NA |           | 0.056  | -0.047 NA | NA       |        |
| A024035_01 | 0.084     | 0.018    | -0.084    | -0.224    | 0.121  | 0.177     | 0.091    | 0.149  |
| A024038_01 | -2.326    | -1.641   | 0.396     | 0.31      | 1.047  | 1.567     | -0.082   | 0.445  |
| A024039_01 | -1.691    | -1.47    | 0.467     | 0.34      | 1.208  | 1.839     | 0.121    | 0.25   |
| A024040_01 | -0.152    | -0.324   | 0.014     | -0.136    | 0.061  | 0.126     | 0.168 NA |        |
| A024042_01 | 0.075 NA  |          | -0.198    | -0.019 NA | NA     |           | 0.3      | 0.229  |
| A024046_01 | 0.111     | 0.105    | -0.188    | -0.283    | 0.283  | 0.352     | 0.212 NA |        |
| A024056_01 | -0.084    | -0.029   | 0.266     | 0.151     | 0.097  | -0.038    | 0.098    | 0.01   |
| A024063_01 | 0.285     | 0.687    | -0.345    | -0.025    | 0.21   | 0.475     | -0.028   | 0.321  |
| A024067_01 | 0.09      | 0.184    | -0.116    | 0.013     | 0.263  | 0.547     | -0.098   | -0.084 |
| A024071_01 | -0.436 NA | NA       |           | -0.518 NA | NA     | NA        |          | 0.299  |
| A024074_01 | 0.028     | -0.127   | -0.063    | -0.271    | 0.008  | 0.09 NA   | NA       |        |
| A024084_01 | 0.062     | -0.115   | -0.139    | -0.309    | -0.017 | -0.11     | 0.291    | 0.112  |
| A024086_01 | -0.002    | 0.158    | -0.119    | -0.39     | 0.221  | 0.257     | -0.01    | 0.049  |
| A024089_01 | 0.212 NA  |          | -0.058    | -0.213    | 0.083  | -0.004 NA | NA       |        |
| A024092_01 | -0.362    | -0.44    | -0.201    | -0.205    | 0.327  | 0.553     | 0.184    | 0.155  |
| A024099_01 | -0.087 NA |          | 0.217     | -0.428    | 0.435  | 0.587     | 0.194    | 0.14   |
| A024101_01 | -0.32 NA  |          | -0.544    | -0.865    | -0.492 | -0.562    | -0.068   | -0.117 |
| A024105_01 | -0.143    | -0.16    | -0.036    | -0.095    | -0.813 | -1.027    | -0.436   | -0.376 |
| A024106_01 | 0.124     | -0.068   | -0.012    | -0.087    | 0.112  | 0.105     | 0.064    | -0.194 |
| A024107_01 | 0.028     | -0.15    | -0.11     | -0.186    | 0.288  | 0.377     | 0.12     | -0.074 |
| A024109_01 | 0.198     | 0.235 NA | NA        |           | 0.288  | 0.204 NA  | NA       |        |
| A024112_01 | -0.134    | -0.106   | -0.229    | -0.214    | -0.735 | -0.702    | -0.566   | -0.383 |
| A024113_01 | 0.135     | -0.033   | 0.055     | 0.048     | -0.23  | -0.592    | -0.168   | -0.282 |
| A024114_01 | 0.402     | 0.211    | -0.418    | -0.477    | -0.282 | -0.547    | 0.676    | 0.447  |
| A024115_01 | 0.067 NA  |          | 0.021     | -0.101    | 0.049  | 0.065 NA  |          | 0.281  |
| A024116_01 | 0.278     | 0.06     | 0.312     | 0.238     | -0.216 | -0.44     | -0.04    | -0.304 |
| A024118_01 | 0.047 NA  |          | 0.087     | -0.061    | 0.312  | 0.277     | 0.174    | 0.109  |
| A024123_01 | 0.224     | -0.008   | -0.273    | -0.234    | -0.106 | -0.051    | 0.138    | -0.158 |
| A024128_01 | -0.265    | 0.027    | -0.137    | -0.252    | -0.132 | -0.19     | 0.064    | 0.118  |
| A024151_01 | 0.082 NA  |          | -0.126    | -0.039 NA |        | -0.324    | -0.032   | -0.216 |
| A024153_01 | -0.028    | -0.056   | -0.016    | -0.351    | 0.179  | 0.186     | -0.155   | -0.066 |
| A024157_01 | 0.697     | 0.395    | 0.484     | 0.323     | 0.38   | 0.262 NA  | NA       |        |
| A024160_01 | 0.31      | -0.072   | -0.118    | -0.363    | 0.399  | 0.353     | 0.335    | 0.125  |
| A024161_01 | 0.324     | 0.18     | -0.053    | -0.112    | 0.211  | 0.136     | 0.212    | 0.13   |
| A024166_01 | 0.071 NA  | NA       | NA        | NA        |        | -0.157 NA |          | 0.043  |
| A024169_01 | -0.033    | 0.266    | -0.136    | -0.382    | 0.094  | 0.21      | -0.175   | 0.283  |
| A024172_01 | 0.183 NA  |          | 0.004     | 0.044     | -0.443 | -0.62     | -0.051   | -0.301 |
| A024173_01 | 0.109     | -0.11    | -0.121    | -0.013    | -0.07  | -0.179    | 0.198    | -0.075 |
| A024174_01 | -0.21     | -0.454   | -0.287    | -0.124    | -0.295 | -0.169    | 0.004    | -0.173 |
| A024175_01 | 0.213 NA  |          | 0.389     | 0.222 NA  |        | -0.565 NA |          | -0.217 |
| A024176_01 | -0.48     | -0.164   | 0.163     | 0.027     | -0.082 | 0.395     | -0.246   | 0.273  |
| A024180_01 | -0.292    | -0.146   | -0.04     | -0.242    | -0.113 | -0.297    | -0.16    | -0.355 |
| A024181_01 | 0.198     | 0.027    | 0.005     | 0.116     | 0.131  | 0.121     | 0.093    | -0.134 |
| A024182_01 | -0.034    | -0.025   | -0.38     | -0.536    | 0.202  | 0.264     | -0.083   | -0.126 |
| A024183_01 | 0.097     | -0.024   | 0.036     | -0.076    | 0.301  | 0.37      | 0.106    | -0.048 |
| A024184_01 | 0.317     | -0.179   | -0.018    | -0.142    | -0.174 | -0.562    | 0.395    | -0.191 |
| A024187_01 | 0.102     | 0.035    | -0.052    | -0.118    | 0.049  | -0.096    | 0.201    | -0.056 |
| A024188_01 | -0.266    | -0.021   | 0.259     | 0.016     | 0.266  | 0.411     | -0.162   | 0.015  |
| A024191_01 | -0.057    | -0.154   | 0.207     | 0.067     | 0.333  | 0.404     | 0.003    | 0.035  |
| A024192_01 | 0.18      | 0.157    | -0.266    | -0.56     | -0.269 | -0.321    | 0.378    | 0.471  |
| A024193_01 | 0.453 NA  |          | 0.134     | 0.008 NA  |        | -0.343    | 0.035    | -0.111 |
| A024195_01 | 0.517     | 0.339    | 0.615     | 0.423     | 0.731  | 0.745     | 0.132    | -0.103 |
| A024196_01 | -0.266 NA |          | -0.013    | -0.045 NA | NA     |           | 0.027    | 0.015  |
| A024197_01 | 0.201     | -0.052   | 0.331     | 0.108     | 0.055  | 0.018     | -0.003   | -0.134 |
| A024199_01 | 0.217 NA  |          | 0.456     | 0.206 NA  | NA     |           | 0.126    | -0.113 |
| A024201_01 | 0.024 NA  |          | -0.207    | -0.159    | 0.09   | 0.106     | 0.099    | 0.073  |
| A024207_01 | 0.1       | 0.115    | 0.006     | -0.011    | 0.196  | -0.053    | 0.145    | 0.07   |
| A024209_01 | 0.232     | 0.354    | 0.419     | 0.175     | 0.058  | -0.132    | -0.024   | 0.026  |
| A024211_01 | 0.327     | 0.333    | 0.082     | -0.201    | 0.194  | 0.083     | 0.092    | 0.16   |
| A024212_01 | 0.119     | 0.036    | -0.14     | -0.139    | 0.132  | 0.163     | 0.05     | 0.021  |
| A024214_01 | 0.006 NA  |          | -0.212    | -0.22 NA  | NA     |           | 0.187    | 0.171  |
| A024215_01 | 0.237     | 0.176    | 0.422     | 0.366     | -0.28  | -0.293    | -0.442   | -0.577 |
| A024219_01 | 0.637     | 0.545    | 0.548     | 0.282     | 0.609  | 0.355     | -0.006   | -0.038 |
| A024220_01 | 0.074 NA  |          | 0.261     | 0.091 NA  | NA     |           | -0.026   | -0.001 |
| A024222_01 | 0.336     | 0.238    | -0.192    | -0.446    | 0      | -0.131    | 0.111    | 0.209  |

|            |           |          |           |           |        |           |           |        |
|------------|-----------|----------|-----------|-----------|--------|-----------|-----------|--------|
| A024223_01 | 0.044 NA  | NA       | NA        | NA        |        | -0.13 NA  | NA        |        |
| A024224_01 | -0.089    | -0.03    | -0.157    | -0.298    | 0.048  | -0.074    | 0.278     | 0.211  |
| A024226_01 | 0.001 NA  |          | 0.505     | 0.114     | 0.011  | -0.055 NA |           | -0.461 |
| A024227_01 | 0.21 NA   |          | 0.829     | 0.542 NA  |        | -0.942    | -0.105    | -0.391 |
| A024228_01 | 0.342     | 0.072 NA |           | -0.315    | 0.692  | 0.486 NA  |           | 0.077  |
| A024229_01 | 0.356     | 0.12     | 0.4       | 0.078     | 0.139  | -0.261    | 0.147     | -0.092 |
| A024230_01 | 0.883     | 0.522    | 0.042     | 0.118     | 1.021  | 1.072     | 0.612     | 0.437  |
| A024232_01 | -0.023    | -0.033   | -0.298    | -0.237    | -0.177 | -0.159    | 0.089     | 0.073  |
| A024235_01 | 0.178     | 0.164    | -0.137 NA |           | 0.059  | 0.176     | 0.03 NA   |        |
| A024236_01 | -0.029    | -0.282   | -0.163    | -0.329    | 0.063  | 0.028     | -0.003    | -0.148 |
| A024237_01 | -0.326    | -0.4     | -0.089    | -0.357    | -0.339 | -0.357    | -0.052    | 0.245  |
| A024239_01 | -0.042    | -0.104   | -0.037    | -0.226    | -0.32  | -0.428    | -0.052    | -0.076 |
| A024241_01 | 0.008 NA  |          | -0.087    | -0.025 NA | NA     |           | 0.336     | -0.12  |
| A024242_01 | 0.022     | 0.072    | -0.229    | 0.023     | -0.083 | 0.052     | -0.005    | 0.182  |
| A024243_01 | 0.179     | -0.143   | 0.124 NA  |           | 0.573  | 0.386 NA  |           | -0.126 |
| A024246_01 | 0.201     | 0.01     | 0.083     | -0.139    | 0.14   | 0.095     | 0.041     | 0.029  |
| A024247_01 | 0.166 NA  |          | 0.126     | -0.074    | 0.073  | -0.046 NA | NA        |        |
| A024248_01 | -1.025    | -1.08    | 0.677     | 0.616     | 1.254  | 1.629     | 0.125     | 0.15   |
| A024249_01 | 0.384     | 0.258    | 0.121     | 0.24      | 0.143  | 0.066     | -0.12     | -0.308 |
| A024250_01 | -0.29     | 0.195    | 0.264     | 0.207     | 0.415  | 0.752     | -0.32     | 0.242  |
| A024251_01 | 0.373     | 0.267    | 0.236     | 0.067     | -0.185 | -0.476    | 0.063     | 0.049  |
| A024253_01 | 0.168     | 0.014    | 0.289     | -0.067    | 0.043  | -0.023 NA | NA        |        |
| A024255_01 | -0.082    | -0.083   | 0.448     | 0.423     | 0.288  | 0.43      | -0.498    | -0.4   |
| A024257_01 | 0.023     | -0.134   | -0.065    | -0.029    | 0.062  | -0.059    | 0.35      | 0.087  |
| A024258_01 | 0.082     | -0.035   | 0.027     | -0.068    | -0.051 | -0.065    | -0.06     | -0.261 |
| A024259_01 | 0.105     | -0.037   | -0.567    | -0.764    | -1.717 | -2.073    | -0.822    | -1.065 |
| A024261_01 | 0.235     | 0.357    | -0.259    | -0.324    | -0.328 | -0.201    | 0.087     | 0.528  |
| A024262_01 | 0.188 NA  |          | 0.254     | 0.02 NA   | NA     | NA        |           | -0.21  |
| A024268_01 | -0.099 NA |          | 0.082     | 0.005 NA  | NA     |           | -0.213    | -0.408 |
| A024270_01 | 0.145 NA  |          | -0.073    | -0.123 NA |        | 0.439     | 0.278     | 0.472  |
| A024271_01 | -0.2      | -0.139   | -0.191    | -0.001    | -0.204 | 0.008     | -0.309    | -0.221 |
| A024272_01 | -0.408    | -0.657   | -0.396    | -0.184    | 0.173  | 0.268 NA  | NA        |        |
| A024274_01 | 0.1       | 0.036    | 0.134     | 0.162     | -0.002 | 0.004     | -0.029    | -0.153 |
| A024276_01 | 0.222     | 0.056    | 0.302     | 0.202     | -0.108 | -0.259    | -0.238    | -0.563 |
| A024279_01 | 0.344     | 0.312 NA | NA        |           | 0.397  | 0.41 NA   | NA        |        |
| A024280_01 | 0.01 NA   | NA       | NA        |           | 0.297  | 0.191 NA  | NA        |        |
| A024282_01 | -0.01     | 0.075    | -0.235    | -0.006    | -0.158 | -0.006    | -0.055    | -0.088 |
| A024284_01 | 0.318 NA  |          | 0.06      | 0.082     | 0.258  | 0.095 NA  |           | 0.038  |
| A024286_01 | 0.056 NA  |          | 0.326     | 0.044 NA  |        | -0.122 NA |           | -0.305 |
| A024288_01 | -0.325    | 0.015    | -0.132    | -0.175    | -0.045 | 0.155     | -0.47     | -0.379 |
| A024289_01 | 0.276     | 0.173    | -0.019    | -0.142    | 0.286  | 0.266 NA  | NA        |        |
| A024291_01 | -0.292    | -0.17    | -0.122    | -0.034    | -0.974 | -0.969    | -0.498    | -0.336 |
| A024292_01 | 0.134     | -0.181   | 0.718     | 0.424     | 0.514  | 0.495     | 0.161     | -0.177 |
| A024293_01 | 0.244 NA  |          | 0.052     | 0.054 NA  |        | -0.155    | -0.026    | -0.128 |
| A024294_01 | -0.058    | 0.027    | -0.035    | 0.026     | 0.042  | 0.073     | 0.078     | -0.049 |
| A024296_01 | 0.851     | 0.355    | 0.532     | 0.249     | 0.682  | 0.49 NA   |           | -0.097 |
| A024297_01 | 0.153 NA  |          | 0.396     | 0.221 NA  |        | -0.064 NA | NA        |        |
| A024298_01 | 0.339     | 0.425    | 0.116     | 0.233     | 0.472  | 0.786     | -0.003    | 0.103  |
| A024299_01 | -0.026    | 0.147    | 0.108     | 0.005     | 0.468  | 0.627     | 0.269     | 0.232  |
| A024300_01 | -0.221    | -0.068   | -0.227    | -0.138    | -0.221 | -0.127    | 0.41      | 0.483  |
| A024302_01 | 0.207     | -0.094   | -0.141    | -0.06     | -0.084 | 0.154 NA  |           | -0.288 |
| A024303_01 | 0.777     | 0.543    | 0.518     | 0.43      | 0.358  | 0.17      | 0.23      | 0.105  |
| A024304_01 | 0.082     | 0.023    | 0.106     | -0.013    | -0.001 | -0.245    | 0.3       | 0.03   |
| A024305_01 | -0.057    | -0.062   | -0.011    | -0.014    | 0.18   | 0.282     | 0.211     | 0.264  |
| A024306_01 | -0.209    | -0.174   | 0.077     | 0.094     | -0.311 | -0.414    | -0.322    | -0.277 |
| A024308_01 | 0.282     | 0.037    | 0.129     | 0.145     | 0.209  | -0.067    | 0.219     | 0.303  |
| A024310_01 | -0.213    | -0.076   | -0.151    | -0.012    | -1.073 | -1.009    | -0.735    | -0.371 |
| A024311_01 | -0.484    | -0.527   | -0.073    | -0.313    | -0.788 | -0.893 NA |           | -0.592 |
| A024312_01 | 0.273     | 0.178    | 0.172     | 0.175     | -0.125 | -0.318    | -0.009    | -0.047 |
| A024315_01 | 0.008     | -0.126   | -0.061    | -0.07     | -0.449 | -0.593    | -0.023    | 0      |
| A024318_01 | -0.363    | -0.273   | -0.328    | -0.167    | -1.087 | -1.062    | -0.555    | -0.397 |
| A024321_01 | -0.155    | -0.1     | 0.188     | 0.02      | -0.092 | -0.165    | -0.089    | -0.121 |
| A024326_01 | -0.406    | 0.147    | -0.648    | -0.646    | 0.489  | 0.916     | 0.22      | 0.593  |
| A024328_01 | -0.165    | -0.052   | -0.03     | -0.175    | 0.083  | 0.115     | 0.229     | 0.289  |
| A024330_01 | -0.162    | 0.044    | -0.116    | 0.13      | -0.305 | -0.06     | -0.145    | -0.051 |
| A024331_01 | 0.103     | 0.025    | 0.027     | -0.247    | 0.328  | 0.208     | 0.059     | -0.115 |
| A024332_01 | -0.111    | 0.107    | 0.104     | -0.071    | -0.93  | -1.068    | -0.667    | -0.483 |
| A024337_01 | 0.098     | 0.26     | 0.071     | -0.231    | -0.063 | -0.059    | -0.166 NA |        |

|            |           |          |          |           |          |           |           |        |
|------------|-----------|----------|----------|-----------|----------|-----------|-----------|--------|
| A024339_01 | -0.014    | -0.154   | 0.457    | 0.435     | -0.214   | -0.313    | -0.25     | -0.372 |
| A024342_01 | -0.116    | -0.033   | 0.504    | 0.318     | -0.063   | -0.199    | 0.107     | 0.087  |
| A024343_01 | 0.108     | -0.031   | 0.267    | 0.182     | -0.762   | -0.991    | -0.349    | -0.572 |
| A024345_01 | 0.211 NA  |          | 0.396    | 0.077 NA  | NA       | NA        | NA        |        |
| A024346_01 | 0.134 NA  |          | 0.175    | 0.036     | -0.475   | -0.49 NA  | NA        |        |
| A024347_01 | 0.186     | 0.094    | 0.271    | 0.134     | 0.193    | 0.188     | 0.209     | 0.043  |
| A024348_01 | 0.127     | 0.203    | 0.289    | 0.115     | 0.022    | -0.285    | 0.085     | -0.013 |
| A024349_01 | -0.129    | 0.199    | 0.84     | 0.613     | 0.669    | 0.89      | -0.482    | 0.04   |
| A024350_01 | 0.593 NA  |          | -0.063   | -0.178    | 0.194 NA | NA        | NA        |        |
| A024352_01 | -0.115    | -0.054   | -0.143   | -0.242    | -0.189   | -0.314    | 0.359     | 0.28   |
| A024353_01 | 0.124     | 0.051    | 0.256    | 0.138     | -0.317   | -0.544    | -0.715    | -1.034 |
| A024354_01 | -1.425 NA |          | -1.31    | -1.533 NA | NA       |           | -1.995 NA |        |
| A024356_01 | -0.585    | -0.157   | 0.106    | 0.108     | -0.063   | 0.059     | -0.159    | -0.052 |
| A024357_01 | 0.082 NA  |          | 0.442    | 0.398 NA  |          | -0.453    | 0.025     | -0.296 |
| A024360_01 | 0.048     | 0.046    | -0.997   | -0.824    | -1.78    | -2.259    | -0.065    | -0.221 |
| A024361_01 | -0.029    | 0.014    | -0.082   | -0.022    | -1.056   | -1.093    | -0.351    | -0.338 |
| A024362_01 | -0.079    | 0.077    | 0.085    | 0.06      | -0.087   | -0.183    | -0.16     | -0.263 |
| A024363_01 | 0.226 NA  |          | 0.261    | -0.04     | 0.073    | -0.201 NA |           | -0.212 |
| A024368_01 | 0.394 NA  |          | 0.428    | 0.195     | -0.113   | -0.333 NA | NA        |        |
| A024369_01 | -0.01 NA  | NA       |          | 0.126 NA  |          | -0.571 NA | NA        |        |
| A024370_01 | 0.301     | -0.099   | -0.096   | -0.118    | 0.061    | 0.352     | 0.118     | 0.123  |
| A024372_01 | 0.259     | 0.322    | -0.25    | -0.086    | 0.196    | 0.289     | 0.11      | -0.035 |
| A024373_01 | 0.424     | 0.109    | 0.231    | 0.189     | 0.644    | 0.599     | 0.08      | -0.23  |
| A024374_01 | 0.119     | -0.092   | 0.104    | -0.013    | 0.079    | 0.096 NA  | NA        |        |
| A024376_01 | 0.4       | 0.141    | 0.098    | 0.002     | 0.04     | -0.214    | 0.147     | -0.296 |
| A024377_01 | -0.048    | -0.025   | 0.049    | -0.157    | -0.213   | -0.088    | -0.301    | -0.083 |
| A024382_01 | 0.395     | 0.423    | 0.142    | 0.192     | 0.231    | 0.103     | 0.224     | 0.042  |
| A024389_01 | 0.161 NA  |          | 0.224    | 0.09      | 0.409    | 0.352     | 0.13      | 0.177  |
| A024392_01 | -0.24     | -0.378   | -0.303   | -0.083    | -0.952   | -1.01     | -0.124    | -0.173 |
| A024394_01 | 0.373     | 0.365    | 0.377    | 0.101     | 0.278    | 0.238     | 0.151 NA  |        |
| A024395_01 | 0.191     | 0.022    | 0.163    | -0.05     | 0.09     | -0.042    | -0.024    | -0.112 |
| A024396_01 | 0.094     | 0.156    | -0.099   | -0.049    | 0.137    | 0.065     | -0.157    | -0.281 |
| A024397_01 | 0.323     | -0.034   | 0.048    | -0.238    | 0.189    | 0.082     | 0.09      | -0.137 |
| A024398_01 | -0.266    | -0.274   | 0.096    | 0.058     | -0.425   | -0.513    | -0.324    | -0.332 |
| A024399_01 | 0.141     | 0.006    | 0.059    | -0.165    | -0.066   | -0.22     | -0.015    | -0.276 |
| A024400_01 | 0.18      | 0.281    | -0.064   | -0.271    | 0.167    | 0.07      | -0.066    | 0.044  |
| A024401_01 | 0.249     | 0.101 NA |          | -0.103 NA |          | -0.194    | 0.179 NA  |        |
| A024402_01 | 0.105 NA  |          | 0.418    | 0.03 NA   |          | -0.693 NA | NA        |        |
| A024403_01 | -0.031    | -0.111   | 0.002    | -0.149    | -0.097   | -0.239    | -0.192    | -0.071 |
| A024404_01 | -0.164    | -0.093   | 0.084    | 0.074     | -0.061   | -0.087    | 0.054     | 0.011  |
| A024405_01 | 0.303 NA  |          | -0.032   | 0.07      | -0.194   | -0.279    | -0.091    | -0.072 |
| A024406_01 | 0.341 NA  |          | 0.418    | 0.227 NA  | NA       | NA        |           | -0.026 |
| A024410_01 | -0.197    | -0.175   | 0.058    | 0.269     | -0.915   | -1.052    | -0.318    | -0.315 |
| A024413_01 | -0.074    | 0.06     | -0.024   | -0.07     | -0.13    | -0.187    | 0.155     | 0.271  |
| A024414_01 | 0.508     | 0.348    | 0.178    | 0.02      | 0.233    | 0.03      | 0.055     | -0.011 |
| A024417_01 | 0.341 NA  |          | -0.008   | -0.296    | 0.921    | 0.716     | 0.371     | 0.062  |
| A024421_01 | 0.29      | 0.005    | -1.058   | -0.974    | 0.649    | 0.789     | 0.118     | -0.067 |
| A024425_01 | -0.073    | 0.254    | 0.048    | 0.043     | -0.447   | -0.389    | -0.062    | -0.104 |
| A024428_01 | 0.264 NA  |          | 0.259    | 0.167 NA  |          | -0.005 NA |           | -0.272 |
| A024429_01 | 0.26 NA   |          | 0.878 NA | NA        |          | -0.581    | -0.21     | -0.235 |
| A024430_01 | 0.245     | 0.268    | 0.065    | 0.078     | 0.06     | 0.033     | -0.137    | -0.181 |
| A024431_01 | -0.055    | -0.179   | -0.244   | -0.103    | 0.118    | 0.171     | 0.225     | 0.132  |
| A024434_01 | -0.067    | -0.056   | -0.507   | -0.753    | -0.118   | -0.124    | -0.168    | -0.017 |
| A024435_01 | 0.156     | 0.294    | 0.277    | 0.39      | 0.239    | 0.364     | -0.135    | -0.072 |
| A024439_01 | 0.151     | 0.15     | -0.099   | 0.101     | 0.066    | 0.231     | -0.052    | 0.094  |
| A024440_01 | 0.08 NA   |          | -0.079   | -0.019    | 0.16     | -0.276    | 0.225     | 0.028  |
| A024441_01 | -0.128 NA |          | 0.455    | 0.243     | -0.144   | -0.497    | -0.332    | -0.244 |
| A024442_01 | 0.462     | 0.521    | 0.034    | -0.04     | 0.428    | 0.442     | 0.034     | 0.155  |
| A024443_01 | -0.34     | -0.165   | -0.134   | -0.208    | -0.798   | -0.81     | -0.47     | -0.308 |
| A024445_01 | -0.044    | -0.048   | 0.11     | -0.171    | 0.239    | -0.125    | 0.03      | -0.05  |
| A024447_01 | -0.011    | 0.18     | 0.704    | 0.755     | 0.483    | 0.754     | -0.037    | -0.133 |
| A024449_01 | -0.141    | -0.109   | 1.268    | 0.966     | 0.303    | 0.25      | -0.331    | -0.401 |
| A024451_01 | 0.39      | 0.038    | 0.16     | -0.013    | 0.027    | -0.03     | -0.024    | -0.161 |
| A024452_01 | -0.006    | 0.036    | 0.152    | 0.033     | 0.121    | -0.022    | 0.091     | 0.035  |
| A024453_01 | -0.154    | -0.206   | 0.021    | -0.057    | -0.361   | -0.309    | -0.062    | 0.14   |
| A024454_01 | -0.881    | -0.79    | -0.807   | -0.716    | -3.089   | -3.38     | -2.447    | -2.034 |
| A024456_01 | 0.242     | 0.093    | -0.018   | 0.001     | -0.405   | -0.583    | -0.037    | -0.218 |
| A024457_01 | 0.449 NA  |          | -1.537   | -1.76     | 0.225    | 0.197     | -0.743    | -0.877 |

|            |        |        |        |        |        |        |        |        |
|------------|--------|--------|--------|--------|--------|--------|--------|--------|
| A024459_01 | 0.172  | 0.083  | 0.104  | -0.226 | 0.197  | 0.124  | 0.113  | 0.03   |
| A024461_01 | 0.025  | 0.172  | 0.092  | 0.027  | 0.013  | 0.134  | -0.292 | -0.077 |
| A024464_01 | -0.826 | -0.787 | -0.013 | -0.187 | 1.054  | 1.422  | 0.318  | 0.094  |
| A024465_01 | 0.295  | 0.374  | -0.189 | -0.138 | 0.164  | 0.291  | 0.037  | -0.038 |
| A024470_01 | 0.042  | 0.157  | 0.05   | -0.026 | 0.328  | 0.454  | 0.203  | 0.377  |
| A024471_01 | -0.055 | 0.047  | -0.069 | -0.207 | -0.023 | 0.004  | 0.292  | 0.507  |
| A024473_01 | -1.062 | -0.421 | 0.024  | -0.269 | 0.382  | 0.863  | -0.051 | NA     |
| A024474_01 | -0.295 | -0.495 | -0.215 | -0.16  | -0.376 | -0.313 | -0.131 | -0.072 |
| A024475_01 | -0.352 | -0.256 | 0.021  | 0.179  | -0.053 | 0.163  | -0.016 | -0.01  |
| A024476_01 | -0.307 | -0.232 | -0.079 | 0.051  | -0.088 | 0.085  | -0.057 | -0.107 |
| A024477_01 | 0.211  | -0.082 | 0.017  | 0.096  | -0.033 | -0.22  | 0.076  | -0.099 |
| A024478_01 | 0.112  | 0.277  | 0.083  | 0.051  | 0.036  | 0.081  | -0.202 | -0.142 |
| A024480_01 | -0.122 | NA     | NA     | NA     | -0.013 | -0.031 | NA     | NA     |
| A024481_01 | 0.408  | 0.368  | -0.364 | -0.416 | 0.714  | 0.957  | 0.685  | 0.757  |
| A024482_01 | 0.273  | 0.221  | 0.001  | -0.079 | 0.111  | -0.057 | 0.129  | 0.138  |
| A024484_01 | 0.135  | 0.057  | 0.082  | 0.157  | 0.353  | 0.518  | 0.104  | 0.192  |
| A024485_01 | -0.872 | -1.062 | 0.557  | 0.766  | 1.016  | 1.602  | 0.357  | 0.055  |
| A024489_01 | 0.154  | -0.033 | -0.123 | -0.215 | 0.096  | -0.067 | 0.192  | -0.016 |
| A024490_01 | 0.07   | 0.063  | -0.04  | 0.091  | -0.236 | -0.329 | NA     | NA     |
| A024493_01 | 0.074  | -0.131 | -0.374 | -0.125 | -0.002 | 0.245  | 0.126  | 0.078  |
| A024494_01 | 0.499  | 0.168  | 0.097  | -0.09  | 0.364  | 0.377  | -0.171 | -0.126 |
| A024495_01 | 0.514  | 0.701  | 0.044  | -0.022 | 0.342  | 0.304  | -0.115 | 0.04   |
| A024496_01 | 0.339  | 0.126  | -0.041 | -0.159 | 0.261  | 0.24   | 0.224  | 0.016  |
| A024499_01 | 0.201  | NA     | -0.065 | NA     | 0.068  | 0.121  | NA     | 0.037  |
| A024500_01 | 0.462  | 0.414  | 0.148  | 0.068  | 0.415  | 0.274  | -0.127 | -0.177 |
| A024501_01 | -0.316 | NA     | 0.29   | 0.342  | NA     | -1.125 | -0.46  | -0.362 |
| A024502_01 | -0.351 | -0.535 | -0.251 | -0.182 | 0.519  | 0.939  | NA     | -0.246 |
| A024503_01 | -0.25  | -0.249 | 0.151  | 0.387  | 0.952  | 1.456  | 0.573  | 0.805  |
| A024504_01 | -0.134 | -0.223 | 0.496  | 0.424  | -0.096 | -0.089 | 0.093  | 0.108  |
| A024505_01 | 0.341  | 0.288  | 0.349  | 0.328  | 0.363  | 0.257  | NA     | -0.018 |
| A024506_01 | 0.141  | 0.023  | -0.091 | -0.201 | -0.508 | -0.639 | 0.164  | -0.059 |
| A024507_01 | -0.23  | 0.089  | -0.311 | -0.382 | -0.067 | -0.048 | 0.037  | 0.224  |
| A024508_01 | -0.071 | 0.064  | 0.093  | 0.089  | 0.564  | 0.846  | 0.15   | 0.247  |
| A024509_01 | 0.125  | 0.04   | 0.097  | 0.077  | 0.409  | 0.768  | 0.139  | 0.165  |
| A024510_01 | -0.064 | NA     | 0.475  | 0.41   | -0.376 | -0.342 | -1.029 | -1.105 |
| A024511_01 | 0.102  | 0.026  | -0.098 | -0.06  | 0.251  | 0.33   | 0.289  | 0.065  |
| A024512_01 | -0.863 | -0.611 | 0.602  | 0.543  | 1.128  | 1.677  | 0.555  | 0.691  |
| A024513_01 | -0.029 | 0.089  | 0.338  | -0.028 | 0.326  | 0.34   | -0.174 | -0.144 |
| A024514_01 | NA     | 0.379  | 0.209  | 0.487  | 0.049  | 0.188  | -0.14  | -0.31  |
| A024518_01 | -0.011 | 0.266  | -0.106 | -0.083 | 0.289  | 0.583  | 0.033  | 0.102  |
| A024521_01 | -0.451 | -0.293 | -0.369 | -0.191 | -0.625 | -0.901 | -0.334 | -0.396 |
| A024522_01 | 0.167  | 0.419  | -0.498 | -0.29  | -0.718 | -0.766 | -0.244 | 0.006  |
| A024523_01 | 0.072  | 0.004  | -0.078 | -0.038 | -0.624 | -0.642 | -0.059 | 0.014  |
| A024526_01 | 0.026  | 0.115  | 0.475  | 0.303  | 0.24   | 0.142  | 0.123  | 0.068  |
| A024527_01 | 0.055  | 0.582  | -0.121 | -0.161 | -1.793 | -2.022 | -0.76  | -0.521 |
| A024528_01 | 0.556  | 0.288  | -0.018 | -0.004 | -0.245 | -0.39  | -0.035 | -0.189 |
| A024530_01 | -0.084 | 0.058  | -0.115 | -0.129 | -0.399 | -0.224 | -0.518 | -0.223 |
| A024531_01 | -0.072 | -0.045 | -0.136 | -0.164 | -0.114 | -0.131 | -0.509 | -0.245 |
| A024532_01 | 0.254  | 0.382  | 0.204  | 0.099  | 0.173  | 0.042  | -0.202 | -0.118 |
| A024534_01 | 0.461  | 0.32   | 0.154  | 0.066  | 0.191  | -0.052 | 0.046  | -0.053 |
| A024536_01 | -0.638 | -0.268 | 0.498  | 0.684  | 0.487  | 0.711  | -0.055 | -0.017 |
| A024538_01 | -0.282 | -0.27  | -0.743 | -0.437 | -0.583 | -0.687 | -0.278 | -0.342 |
| A024539_01 | -0.253 | -0.173 | -0.242 | -0.061 | -0.165 | -0.128 | -0.155 | NA     |
| A024544_01 | 0.332  | NA     | 0.485  | 0.298  | 0.805  | 0.752  | 0.432  | 0.305  |
| A024545_01 | -0.617 | -0.198 | 0.067  | 0.178  | -0.055 | 0.005  | -0.137 | 0.156  |
| A024546_01 | 0.028  | -0.084 | 0.02   | 0.15   | -0.316 | -0.245 | 0.173  | -0.159 |
| A024547_01 | -0.133 | NA     | -0.119 | -0.06  | NA     | NA     | 0.124  | 0.118  |
| A024548_01 | -0.054 | -0.001 | -0.257 | -0.4   | 0.388  | 0.268  | 0.276  | 0.122  |
| A024549_01 | -0.035 | 0.005  | 0.025  | -0.128 | 0.124  | 0.018  | 0.204  | 0.255  |
| A024551_01 | 0.266  | 0.142  | 0.305  | 0.314  | 0.422  | 0.5    | NA     | NA     |
| A024554_01 | -0.066 | 0.058  | -0.209 | -0.181 | -0.04  | 0.056  | 0.025  | 0.114  |
| A024555_01 | 0.135  | 0.355  | 0.83   | 0.739  | 0.932  | 1.097  | -0.391 | -0.223 |
| A024557_01 | 0.385  | 0.533  | 0.211  | 0.245  | 0.45   | 0.904  | 0.071  | 0.203  |
| A024558_01 | -0.026 | 0.09   | 0.119  | 0.124  | 0.087  | 0.228  | -0.124 | 0.063  |
| A024559_01 | 0.345  | 0.153  | 0.102  | -0.025 | 0.562  | 0.408  | 0.115  | -0.119 |
| A024560_01 | 0.469  | 0.334  | 0.328  | 0.127  | 0.175  | -0.038 | 0.001  | -0.113 |
| A024561_01 | 0.055  | 0.226  | 0.442  | 0.297  | -0.19  | -0.314 | -0.203 | -0.153 |
| A024562_01 | -0.385 | -0.233 | -0.119 | 0.005  | -1.096 | -1.2   | -0.472 | -0.305 |

|            |        |        |        |        |        |        |        |        |
|------------|--------|--------|--------|--------|--------|--------|--------|--------|
| A024563_01 | -0.311 | NA     | 0.32   | 0.265  | -0.972 | -1.161 | 0.248  | 0.415  |
| A024564_01 | -0.381 |        | -0.098 | -0.05  | -0.221 | -0.072 | -0.092 | 0.103  |
| A024565_01 | -0.232 | -0.207 | 0.191  | 0.277  | -0.429 | -0.435 | -0.072 | 0.029  |
| A024567_01 | 0.119  | NA     | 0.04   | -0.139 | NA     | -0.065 | 0.376  | 0.184  |
| A024568_01 | 0.154  | -0.078 | 0.17   | -0.049 | 0.205  | 0.026  | NA     | NA     |
| A024569_01 | -0.134 | NA     | 0.146  | 0.21   | -0.157 | -0.053 | NA     | -0.265 |
| A024570_01 | 0.129  | -0.087 | 0.074  | -0.038 | -0.069 | 0.039  | 0.013  | 0.202  |
| A024571_01 | 0.148  | 0.298  | -0.178 | -0.216 | 0.311  | 0.405  | 0.193  | 0.149  |
| A024572_01 | 0.095  | 0.068  | 0.025  | -0.149 | -0.154 | -0.131 | 0.108  | -0.024 |
| A024573_01 | 0.239  | NA     | 0.355  | -0.015 | NA     | NA     |        | -0.405 |
| A024575_01 | 0.234  | NA     | 0.29   | 0.115  | 0.157  | 0.011  | 0.008  | 0.138  |
| A024576_01 | 0.054  | -0.093 | -0.162 | -0.171 | -0.467 | -0.757 | 0.223  | -0.028 |
| A024577_01 | 0.023  | 0.287  | 0.012  | -0.086 | -0.027 | 0.138  | NA     | -0.026 |
| A024578_01 | -0.19  | -0.143 | -0.295 | -0.361 | -0.196 | -0.187 | -0.151 | -0.24  |
| A024579_01 | 0.382  | NA     | -0.208 | -0.23  | NA     | -0.027 | 0.316  | 0.008  |
| A024580_01 | 0.508  | 0.354  | -0.081 | -0.165 | 0.317  | 0.26   | 0.122  | 0.108  |
| A024581_01 | 0.548  | 0.534  | 0.526  | 0.72   | 0.199  | 0.177  | 0.003  | 0.044  |
| A024583_01 | -0.04  | -0.191 | 0.109  | -0.122 | -0.188 | -0.104 | -0.205 | -0.121 |
| A024584_01 | -0.365 | -0.048 | 0.081  | 0.029  | -0.007 | 0.171  | -0.316 | 0.209  |
| A024585_01 | -0.475 | -0.074 | -0.109 | 0.195  | -1.01  | -1.023 | -0.347 | -0.181 |
| A024586_01 | -0.091 | -0.094 | 0.318  | 0.128  | -0.671 | -0.854 | -0.472 | -0.39  |
| A024588_01 | -0.396 | -0.2   | -0.374 | -0.177 | -0.685 | -0.987 | 0.242  | 0.21   |
| A024589_01 | -0.175 | -0.157 | -0.065 | -0.039 | -0.015 | 0.16   | -0.051 | 0.032  |
| A024590_01 | -0.091 | -0.224 | -0.152 | 0.031  | 0.088  | 0.31   | 0.411  | 0.377  |
| A024592_01 | -0.05  | -0.039 | -0.295 | -0.296 | 0.09   | 0.272  | 0.057  | 0.087  |
| A024595_01 | 0.262  | 0.258  | -0.14  | -0.206 | 0.037  | 0.212  | 0.127  | 0.285  |
| A024596_01 | 0.197  | 0.112  | -0.13  | -0.276 | -0.11  | -0.009 | -0.066 | 0.086  |
| A024597_01 | -0.117 | -0.158 | 0.015  | 0.291  | -0.249 | -0.397 | 0.087  | -0.17  |
| A024598_01 | 0.455  | 0.285  | -0.017 | 0.093  | 0.374  | 0.343  | 0.087  | 0.066  |
| A024599_01 | 0.643  | 0.679  | 0.381  | 0.272  | 0.604  | 0.49   | 0.032  | 0.159  |
| A024601_01 | -0.139 | NA     | 0.277  | 0.023  | -0.001 | 0.126  | NA     | -0.223 |
| A024602_01 | -0.258 | -0.18  | -0.175 | -0.112 | 0.092  | 0.096  | 0.109  | 0.069  |
| A024603_01 | 0.399  | 0.274  | 0.289  | 0.078  | 0.201  | 0.141  | -0.056 | -0.057 |
| A024604_01 | 0.284  | 0.064  | -0.412 | -0.138 | -0.115 | -0.322 | 0.066  | -0.143 |
| A024605_01 | -0.173 | -0.016 | -0.096 | -0.266 | -0.121 | -0.111 | -0.117 | 0.1    |
| A024606_01 | 0.275  | NA     | -0.057 | -0.164 | 0.297  | 0.17   | 0.118  | -0.06  |
| A024607_01 | -0.006 | -0.102 | 0.057  | -0.012 | 0.011  | -0.203 | -0.036 | -0.15  |
| A024608_01 | 0.222  | 0.063  | 0.65   | 0.614  | 0.525  | 0.666  | 0.104  | -0.098 |
| A024609_01 | 0.532  | 0.337  | 0.069  | -0.376 | 0.231  | -0.098 | 0.276  | 0.06   |
| A024610_01 | 0.325  | 0.27   | -0.23  | -0.199 | 0.801  | 1.036  | 0.138  | 0.174  |
| A024611_01 | 0.367  | 0.262  | 0.33   | 0.328  | 0.551  | 0.481  | 0.139  | 0.129  |
| A024612_01 | 0.305  | 0.458  | -0.063 | -0.155 | 0.498  | 0.477  | 0.27   | 0.306  |
| A024613_01 | 0.027  | -0.05  | -0.182 | -0.031 | 0.11   | 0.18   | 0.004  | -0.054 |
| A024614_01 | 0.181  | 0.108  | 0.004  | 0.024  | -0.188 | -0.339 | NA     | -0.148 |
| A024615_01 | -0.125 | 0.056  | -0.142 | -0.295 | 0.028  | 0.02   | -0.162 | -0.142 |
| A024616_01 | 0.38   | 0.124  | -0.229 | -0.081 | -0.91  | -1.434 | 0.333  | 0.274  |
| A024617_01 | -0.266 | -0.053 | 0.136  | 0.064  | -0.164 | -0.187 | -0.141 | -0.149 |
| A024620_01 | 0.394  | 0.61   | 0.078  | 0.235  | -0.347 | -0.635 | 0.005  | 0.053  |
| A024621_01 | -0.368 | NA     | 0.278  | 0.339  | NA     | NA     | -0.031 | -0.236 |
| A024622_01 | 0.38   | 0.441  | -0.144 | 0.07   | -0.055 | 0.031  | -0.197 | -0.144 |
| A024624_01 | 0.17   | 0.239  | -0.085 | -0.301 | 0.136  | 0.164  | 0.106  | 0.129  |
| A024626_01 | -0.009 | NA     | 0.465  | 0.477  | -0.104 | -0.3   | -0.119 | -0.304 |
| A024627_01 | -0.021 | 0.045  | -0.029 | -0.085 | 0.374  | 0.667  | 0.116  | 0.092  |
| A024628_01 | NA     | 0.141  | 0.13   | 0.183  | 0.179  | 0.226  | NA     | 0.019  |
| A024629_01 | 0.061  | 0.092  | -0.241 | -0.017 | 0.142  | 0.255  | 0.261  | 0.211  |
| A024630_01 | -0.385 | -0.269 | 0.048  | 0.084  | -1.109 | -1.235 | -0.236 | -0.424 |
| A024631_01 | 0.111  | -0.052 | 0.007  | -0.236 | 0.273  | 0.106  | -0.018 | -0.204 |
| A024632_01 | 0.043  | -0.073 | -0.164 | 0.013  | -0.085 | 0.129  | -0.138 | -0.244 |
| A024633_01 | -0.462 | -0.408 | 0.485  | 0.319  | -1.072 | -1.1   | -0.92  | -0.72  |
| A024634_01 | 0.045  | 0.074  | 0.059  | 0.108  | 0.285  | 0.252  | 0.221  | 0.337  |
| A024635_01 | -0.593 | -0.745 | -0.003 | -0.201 | -0.7   | -0.759 | -0.135 | 0.076  |
| A024636_01 | 0.482  | 0.298  | 0.102  | 0.121  | 0.48   | 0.558  | -0.094 | -0.316 |
| A024637_01 | -0.349 | -0.137 | -0.013 | 0.031  | -0.742 | -0.676 | -0.554 | -0.443 |
| A024638_01 | -0.353 | -0.186 | 0.161  | 0.159  | 0.167  | 0.281  | 0.001  | 0.13   |
| A024640_01 | 0.377  | 0.181  | 0.116  | 0.085  | -0.065 | -0.374 | 0.039  | -0.182 |
| A024642_01 | 0.691  | 0.551  | 0.327  | 0.083  | 0.698  | 0.569  | -0.024 | -0.132 |
| A024644_01 | -0.087 | 0.079  | 0.235  | 0.392  | -1.043 | -1.068 | -0.38  | -0.252 |
| A024645_01 | -0.083 | -0.091 | -0.24  | -0.321 | 0.027  | 0.084  | 0.212  | 0.178  |

|            |           |           |           |           |        |           |        |        |
|------------|-----------|-----------|-----------|-----------|--------|-----------|--------|--------|
| A024646_01 | 0.133     | -0.207    | -0.067    | 0.097     | -0.082 | -0.032 NA | NA     |        |
| A024647_01 | -0.953    | -0.772    | -0.043 NA |           | -1.554 | -1.862 NA |        | -0.889 |
| A024648_01 | 0.241     | 0.37      | 0.158     | 0.101     | -0.221 | -0.286    | -0.007 | -0.049 |
| A024649_01 | -0.512    | -0.275    | 0.895     | 1.004     | -0.533 | -0.393    | -0.435 | -0.21  |
| A024650_01 | 0.258     | 0.094     | 0.088 NA  |           | -0.066 | -0.109    | 0.354  | 0.309  |
| A024651_01 | -0.126    | -0.158    | 0.03      | -0.011    | -0.344 | -0.459    | -0.133 | -0.055 |
| A024652_01 | -0.216    | -0.235    | -0.189    | -0.2      | -0.584 | -0.533    | -0.287 | -0.124 |
| A024653_01 | 0.214 NA  |           | -0.354    | -0.419 NA | NA     |           | 0.187  | 0.135  |
| A024656_01 | 0.267     | 0.189     | -0.081    | -0.139    | 0.168  | -0.033    | 0.28   | 0.061  |
| A024657_01 | -0.296    | -0.066    | 0.102     | 0.141     | -1.057 | -1.142    | -0.21  | -0.074 |
| A024658_01 | 0.101 NA  |           | 0.288     | 0.363     | 0.332  | 0.2       | 0.193  | 0.075  |
| A024659_01 | -0.177 NA |           | -0.106    | -0.032 NA | NA     |           | -0.093 | -0.046 |
| A024661_01 | 0.199     | -0.121    | -0.025    | -0.195    | 0.336  | 0.419     | 0.261  | 0.046  |
| A024663_01 | 0.49      | 0.167     | 0.25      | 0.165     | 0.468  | 0.603     | 0.123  | -0.036 |
| A024664_01 | -0.131    | 0.122     | -0.254    | -0.164    | 0.081  | 0.573     | -0.033 | 0.082  |
| A024665_01 | 0.111     | -0.097    | -0.491    | -0.377    | 0.05   | 0.066     | 0.21   | 0.225  |
| A024666_01 | 0.155     | 0.037     | 0.255     | 0.401     | -0.096 | -0.037    | -0.35  | -0.382 |
| A024667_01 | 0.138     | 0.089     | 0.219     | -0.154    | 0.007  | -0.22     | -0.051 | -0.091 |
| A024669_01 | 0.129 NA  |           | -0.014    | -0.003 NA |        | -0.485    | 0.12   | -0.077 |
| A024670_01 | -0.077    | -0.107    | -0.165    | -0.035    | -0.519 | -0.388    | 0.173  | 0.257  |
| A024671_01 | 0.09      | 0.148     | 0.199     | -0.003    | -0.295 | -0.339 NA | NA     |        |
| A024672_01 | -0.149    | -0.234    | 0.11      | 0.096     | -0.24  | -0.227    | 0.075  | 0.194  |
| A024673_01 | -0.745    | -0.904    | -0.314    | -0.416    | -0.607 | -0.499    | -0.304 | -0.226 |
| A024674_01 | -0.573    | -0.379    | -0.316    | -0.326    | -0.157 | 0.017     | -0.403 | -0.405 |
| A024675_01 | 0.184     | -0.019    | -0.106    | -0.049    | 0.032  | 0.036     | -0.04  | -0.286 |
| A024676_01 | 0.064     | 0.05      | -0.336    | -0.133    | -0.06  | 0.096     | 0.118  | 0.062  |
| A024677_01 | 0.423     | 0.161     | 0.341     | 0.421     | 0.02   | -0.073    | 0.005  | -0.109 |
| A024678_01 | 0.236 NA  | NA        |           | -0.273    | -0.071 | -0.45 NA  | NA     |        |
| A024680_01 | 0.093     | 0.062     | 0.297     | 0.336     | -0.062 | -0.073    | -0.056 | -0.085 |
| A024681_01 | -0.086    | -0.217    | 0.225     | 0.272     | -0.654 | -0.789 NA |        | -0.211 |
| A024682_01 | 0.73      | 0.585     | 0.347     | 0.453     | -0.848 | -1.131    | 0.025  | -0.053 |
| A024684_01 | -0.02     | 0.158     | 0.051     | -0.045    | 0.112  | 0.373     | -0.294 | -0.019 |
| A024686_01 | 0.143 NA  |           | 0.138     | 0.019 NA  |        | -0.176    | 0.128  | -0.106 |
| A024687_01 | 0.04      | 0.144     | 0.598     | 0.434     | 0.196  | 0.064     | -0.422 | -0.441 |
| A024689_01 | 0.199     | 0.125     | 0.101     | -0.258    | -0.178 | -0.576    | 0.215  | -0.017 |
| A024690_01 | -0.332    | 0.059     | 0.356     | -0.011    | -0.56  | -0.748    | -0.233 | -0.341 |
| A024694_01 | -0.054    | -0.082    | 0.083 NA  |           | -0.299 | -0.172 NA |        | -0.681 |
| A024699_01 | 0.033     | -0.213    | -0.296    | -0.697    | 0.621  | 0.878     | 0.206  | 0.071  |
| A024718_01 | 0.422     | -0.098    | -0.073    | -0.39     | 0.303  | -0.183    | 0.282  | -0.127 |
| A024719_01 | 0.077 NA  |           | 0.112     | -0.056 NA |        | 0.091 NA  |        | 0.185  |
| A024720_01 | 0.174     | 0.098     | 0.022     | -0.139    | -0.119 | -0.26 NA  |        | -0.037 |
| A024724_01 | -0.379    | -0.553    | -0.091    | -0.328    | -0.226 | -0.368    | -0.322 | -0.611 |
| A024725_01 | -0.119    | -0.242    | 0.189     | -0.07     | -0.456 | -0.652    | -0.512 | -0.62  |
| A024728_01 | 0.227     | 0.118     | 0.147     | -0.201    | -0.148 | -0.57     | -0.079 | -0.389 |
| A024749_01 | 0.389 NA  | NA        |           | -0.071    | 0.215  | 0.114 NA  | NA     |        |
| A024778_01 | 0.201     | -0.129 NA |           | 0.028     | -0.218 | -0.464 NA | NA     |        |
| A024780_01 | 0.152     | -0.109    | -0.096    | -0.144    | 0.175  | 0.166     | 0.265  | -0.014 |
| A024783_01 | -0.128 NA |           | 0.033     | -0.15     | -0.032 | -0.025    | 0.058  | 0.074  |
| A024784_01 | 0.206 NA  |           | 0.021     | -0.002    | 0.163  | -0.073    | 0.2    | -0.179 |
| A024785_01 | -0.653    | -0.819    | -0.089    | -0.226    | -0.533 | -0.467    | -0.548 | -0.29  |
| A024786_01 | 0.067     | -0.448    | -0.112    | -0.182    | -0.237 | -0.386    | 0.297  | 0.014  |
| A024788_01 | 0.037     | 0.154     | -0.835    | -0.843    | -0.136 | 0.181     | 0.449  | 0.746  |
| A024789_01 | -0.181    | 0.03      | -0.527    | -0.463    | -0.144 | 0.079     | 0.404  | 0.511  |
| A024790_01 | 0.402     | 0.565     | -0.082    | -0.053    | -0.041 | -0.031    | -0.267 | -0.179 |
| A024791_01 | 0.063     | 0.195     | -0.293    | -0.379    | 0.164  | -0.005    | 0.337  | 0.382  |
| A024794_01 | 0.339     | 0.007     | -0.085    | -0.21     | 0.236  | -0.011    | 0.247  | -0.309 |
| A024795_01 | 0.094     | 0.123     | 0.231     | 0.045     | -0.46  | -0.756    | -0.228 | -0.26  |
| A024822_01 | 0.171     | 0.241     | -0.24     | -0.27     | 0.179  | 0.301     | 0.083  | -0.112 |
| A024841_01 | 0.512 NA  |           | 0.445     | 0.208     | 0.774  | 0.733     | -0.431 | -0.334 |
| A024854_01 | 0.037 NA  |           | 0.371     | 0.438     | 0.3    | 0.197     | -0.04  | -0.145 |
| A024856_01 | -2.485    | -2.194    | -1.195    | -1.345 NA | NA     | NA        | NA     |        |
| A024862_01 | 0.268     | -0.136    | -0.316    | -0.615    | 0.293  | 0.284     | 0.256  | 0.072  |
| A024863_01 | 0.09      | 0.251     | 0.547     | 0.162     | -0.586 | -0.718 NA |        | -0.683 |
| A024872_01 | 0.159 NA  |           | 0.111     | 0.052     | 0.817  | 0.926     | 0.014  | 0.156  |
| A024873_01 | 0.648     | 0.285     | -0.003    | -0.15     | 0.939  | 0.991     | 0.047  | -0.206 |
| A024876_01 | 0.125     | -0.086    | -0.076    | -0.092    | 0.145  | 0.048     | 0.14   | -0.183 |
| A024881_01 | 0.315     | 0.145     | 0.057     | -0.102    | 0.225  | 0.088 NA  |        | -0.457 |
| A024886_01 | -0.054    | -0.259    | -0.116    | -0.331    | 0.145  | 0.056     | 0.353  | 0.044  |



|            |        |        |        |        |        |        |        |        |
|------------|--------|--------|--------|--------|--------|--------|--------|--------|
| A024890_01 | 0.5    | 0.174  | 0.63   | 0.478  | 0.758  | 0.687  | 0.096  | -0.188 |
| A024913_01 | 0.085  | -0.069 | 0.26   | 0.311  | -0.263 | -0.33  | -0.253 | -0.482 |
| A024975_01 | 0.102  | -0.09  | 0.146  | -0.007 | 0.128  | -0.135 | NA     | -0.072 |
| A024976_01 | 0.052  | NA     | NA     | NA     | NA     | NA     | NA     | -0.661 |
| A024978_01 | 0.081  | -0.073 | 0.205  | 0.108  | -0.465 | -0.624 | -0.265 | -0.282 |
| A024993_01 | -0.049 | -0.254 | 0.182  | 0.041  | -0.056 | -0.156 | -0.022 | -0.138 |
| A025018_01 | 0.526  | 0.36   | 0.215  | 0.176  | -0.039 | -0.336 | -0.004 | -0.149 |
| A025019_01 | 0.413  | NA     | 0.093  | 0.043  | NA     | -0.44  | 0.162  | -0.006 |
| A025036_01 | 0.175  | 0.226  | 0.108  | -0.012 | -0.044 | -0.116 | -0.016 | -0.013 |
| A025053_01 | 0.655  | NA     | 0.526  | 0.535  | NA     | NA     | -0.117 | -0.119 |
| A025058_01 | 0.418  | 0.241  | 0.244  | 0.015  | -0.513 | -0.744 | -0.563 | -0.635 |
| A025060_01 | -0.753 | -0.547 | -1.361 | -1.304 | -0.732 | -0.297 | -0.897 | -0.707 |
| A025061_01 | -0.147 | 0.109  | -0.267 | -0.227 | 0.378  | 0.858  | 0.113  | 0.41   |
| A025074_01 | 0.2    | 0.111  | 0.017  | 0.121  | 0.236  | 0.306  | 0.322  | 0.098  |
| A025076_01 | 0.015  | -0.001 | 0.012  | -0.035 | -0.12  | -0.09  | -0.249 | -0.215 |
| A025079_01 | 0.239  | NA     | NA     | NA     | 0.464  | 0.61   | NA     | -0.005 |
| A025085_01 | 0.252  | 0.236  | NA     | -0.133 | 0.105  | -0.242 | NA     | NA     |
| A025092_01 | -0.024 | -0.022 | NA     | NA     | 0.479  | 0.574  | NA     | NA     |
| A025101_01 | 0.274  | 0.075  | 0.073  | -0.121 | 0.137  | -0.083 | 0.204  | 0.01   |
| A025116_01 | 0.679  | 0.507  | 0.131  | -0.044 | 0.087  | -0.117 | -0.083 | -0.185 |
| A025130_01 | -0.253 | -0.262 | -0.274 | -0.23  | 0.202  | 0.48   | -0.379 | -0.351 |
| A025131_01 | 0.151  | 0.012  | -0.001 | -0.047 | -0.105 | 0.017  | -0.071 | NA     |
| A025148_01 | -0.164 | -0.395 | 0.405  | 0.279  | -0.125 | -0.125 | NA     | NA     |
| A025176_01 | 0.286  | 0.091  | -0.007 | 0.096  | -0.658 | -0.893 | -0.126 | -0.373 |
| A025188_01 | 0.05   | NA     | 0.081  | -0.009 | NA     | -0.556 | 0.314  | -0.188 |
| A025190_01 | -2.08  | -1.89  | -0.888 | -0.851 | -2.724 | -3.8   | -1.903 | -1.818 |
| A025206_01 | 0.035  | -0.117 | 0.637  | 0.603  | 1.013  | 1.098  | 0.067  | -0.021 |
| A025211_01 | 0.699  | 0.329  | 0.058  | -0.235 | 0.186  | 0.062  | NA     | 0.225  |
| A025242_01 | 0.351  | 0.061  | 0.194  | -0.167 | 0.459  | 0.23   | -0.039 | -0.15  |
| A025254_01 | 0.365  | 0.297  | 0.141  | 0.118  | 0.167  | -0.079 | -0.052 | -0.166 |
| A025261_01 | 0.221  | 0.119  | 0.019  | -0.132 | -0.219 | -0.463 | 0.072  | -0.166 |
| A025268_01 | 0.18   | NA     | 0.684  | 0.677  | 0.765  | 0.808  | 0.093  | -0.026 |
| A025273_01 | -0.236 | -0.176 | -0.108 | -0.085 | -0.117 | 0.083  | -0.148 | -0.045 |
| A025274_01 | 0.115  | -0.007 | -0.261 | -0.244 | -0.041 | 0.053  | 0.111  | 0.038  |
| A025287_01 | 0.2    | 0.087  | 0.247  | 0.33   | 0.165  | 0.124  | NA     | NA     |
| A025301_01 | -0.028 | NA     | 0.054  | -0.09  | 0.285  | 0.193  | 0.111  | 0.014  |
| A025313_01 | 0.662  | 0.286  | 0.216  | 0.079  | 0.367  | 0.303  | 0.148  | 0.079  |
| A025335_01 | -0.03  | -0.069 | -0.083 | NA     | -0.105 | -0.033 | NA     | -0.022 |
| A025341_01 | 0.452  | 0.287  | 0.231  | 0.177  | -0.112 | -0.34  | -0.234 | -0.291 |
| A025351_01 | -0.098 | -0.322 | 0.137  | NA     | -0.13  | -0.286 | NA     | NA     |
| A025353_01 | 0.197  | 0.288  | 0.319  | 0.149  | -0.055 | -0.235 | -0.196 | -0.13  |
| A025368_01 | -3.185 | -2.332 | -1.437 | -1.264 | -3.83  | -4.738 | -2.921 | -2.853 |
| A025372_01 | 0.165  | 0.351  | 0.332  | -0.045 | 0.591  | 0.676  | -0.148 | 0.086  |
| A025376_01 | 0.041  | -0.176 | -0.108 | 0.003  | -0.319 | -0.238 | NA     | NA     |
| A025393_01 | 0.155  | 0.147  | NA     | NA     | 0.089  | 0.088  | NA     | NA     |
| A025394_01 | 0.165  | 0.291  | -0.023 | 0.051  | 0.142  | 0.148  | -0.255 | -0.343 |
| A025397_01 | -1.422 | NA     | 0.593  | 0.383  | -0.818 | -1.528 | -0.877 | -0.666 |
| A025403_01 | -0.389 | -0.269 | 0.054  | 0.1    | 0.101  | 0.256  | -0.35  | -0.015 |
| A025406_01 | 0.493  | NA     | 0.21   | 0.352  | NA     | NA     | -0.274 | -0.263 |
| A025408_01 | 0.11   | 0.497  | 0.32   | -0.062 | 0.727  | 0.933  | -0.065 | 0.325  |
| A025418_01 | 0.032  | NA     | 0.933  | NA     | 0.534  | 0.496  | NA     | NA     |
| A025456_01 | 0.363  | 0.143  | 0.163  | 0.121  | -0.118 | -0.523 | 0.162  | -0.075 |
| A025462_01 | -0.112 | -0.275 | -0.176 | -0.194 | 0.151  | 0.321  | 0.413  | 0.318  |
| A025468_01 | -0.23  | -0.254 | -0.07  | 0.009  | 0.26   | 0.48   | 0.089  | 0.006  |
| A025469_01 | -2.164 | -2.136 | 1.048  | 0.609  | 1.314  | 1.612  | 0.185  | 0.335  |
| A025479_01 | -0.399 | -0.478 | 0.267  | 0.211  | -0.484 | -0.643 | -0.303 | -0.389 |
| A025487_01 | -0.039 | -0.022 | -0.183 | -0.55  | 0.113  | -0.175 | -0.502 | -0.702 |
| A025502_01 | 0.198  | NA     | 0.108  | -0.206 | NA     | NA     | NA     | -0.171 |
| A025513_01 | -0.194 | NA     | 0.414  | NA     | NA     | 0.23   | NA     | NA     |
| A025519_01 | 0.162  | NA     | -0.021 | -0.096 | -0.061 | -0.164 | NA     | 0.261  |
| A025522_01 | 0.101  | -0.063 | -0.16  | -0.194 | 0.215  | NA     | 0.136  | -0.008 |
| A025542_01 | -0.315 | -0.295 | 0.007  | -0.088 | NA     | -0.343 | NA     | NA     |
| A025582_01 | 0.349  | NA     | 0.604  | 0.31   | NA     | NA     | -0.396 | -0.492 |
| A025585_01 | 0.318  | NA     | 0.035  | NA     | 0.018  | -0.181 | NA     | NA     |
| A025587_01 | -0.023 | NA     | -0.013 | NA     | NA     | NA     | -0.006 | -0.043 |
| A025588_01 | 0.238  | 0.284  | -0.02  | -0.207 | 0.496  | 0.503  | 0.305  | 0.314  |
| A025590_01 | -0.334 | -0.566 | -0.553 | -0.5   | -0.663 | -0.819 | -0.069 | -0.344 |
| A025600_01 | -0.316 | -0.662 | -0.383 | -0.714 | -0.449 | -0.837 | NA     | -0.056 |

|            |    |           |        |          |           |        |           |           |        |
|------------|----|-----------|--------|----------|-----------|--------|-----------|-----------|--------|
| A025603_01 |    | -0.143    | 0.059  | -0.273   | -0.327    | -0.085 | 0.118     | -0.043    | 0.245  |
| A025613_01 |    | 0.156     | 0.328  | -0.072   | -0.019    | -0.031 | 0.053 NA  | NA        |        |
| A025618_01 |    | 0.066     | 0.099  | 0.277    | 0.213     | -0.457 | -0.584    | -0.147    | -0.285 |
| A025621_01 |    | 0.21 NA   |        | 0.195    | -0.095    | 0.227  | 0.191 NA  |           | -0.206 |
| A025639_01 |    | 0.226 NA  |        | 0.141    | -0.133    | 0.912  | 1.013     | 0.317     | 0.293  |
| A025644_01 |    | 0.43      | 0.742  | -0.094   | -0.099    | 0.05   | 0.063     | -0.228    | -0.108 |
| A025645_01 |    | -0.106    | -0.321 | 0.073    | -0.054    | -0.643 | -0.828    | -0.169    | -0.196 |
| A025683_01 |    | -0.885    | -0.69  | -1.222   | -0.965    | 0.593  | 0.944     | -0.477    | -0.039 |
| A025697_01 |    | 0.344     | 0.238  | 0.142    | 0.027 NA  |        | -0.303    | -0.132    | 0.018  |
| A025712_01 |    | 0.168 NA  |        | 0.528    | 0.204 NA  | NA     |           | 0.098     | -0.329 |
| A025718_01 |    | 0.26 NA   |        | 0.778    | 0.597 NA  |        | -0.017    | -0.382    | -0.39  |
| A025719_01 |    | 0.111     | 0.091  | 0.361    | 0.065     | 0.048  | -0.089    | -0.012    | 0.041  |
| A025727_01 |    | -0.522    | -0.093 | -0.355   | -0.358    | 0.412  | 1.001     | -0.295    | 0.139  |
| A025728_01 |    | -0.653 NA |        | 0.189    | -0.004    | -0.291 | -0.067 NA |           | -0.01  |
| A025730_01 |    | 0.022     | -0.226 | 0.099 NA |           | -0.212 | -0.183 NA | NA        |        |
| A025733_01 |    | -0.766    | -0.589 | 0.654    | 0.398     | 0.863  | 0.996     | 0.453     | 0.227  |
| A025735_01 |    | -0.073    | -0.045 | 0.127    | 0.095     | -0.043 | 0.03      | -0.048    | -0.146 |
| A025739_01 |    | 0.359     | 0.262  | -0.351   | -0.701    | 0.371  | 0.375     | 0.108     | 0.182  |
| A025740_01 |    | -0.147    | 0.588  | -0.133   | -0.986    | 0.395  | 0.725     | -0.041    | 0.579  |
| A025747_01 |    | -0.155 NA |        | 0.066    | 0.097     | -0.019 | -0.067    | 0.083     | 0.019  |
| A025758_01 | NA | NA        |        | 0.084    | -0.007    | -0.125 | -0.208 NA |           | -0.036 |
| A025759_01 |    | 0.497     | 0.954  | -0.071   | -0.105    | 0.104  | -0.176    | 0.074     | 0.254  |
| A025762_01 | NA | NA        |        | 0.167    | 0.161 NA  |        | -1.71 NA  | NA        |        |
| A025765_01 |    | 0.608     | 0.741  | 0.86     | 0.742     | -0.385 | -0.704    | 0.478     | 0.434  |
| A025767_01 |    | -0.223    | 0.256  | 0.386    | 0.018     | 0.086  | 0.402     | 0.009     | 0.457  |
| A025768_01 |    | 0.202     | -0.039 | -0.053   | -0.143    | -0.027 | -0.037    | -0.152    | -0.159 |
| A025769_01 |    | 0.005     | 0.028  | -0.386   | -0.213    | -0.576 | -0.868    | 0.011     | -0.084 |
| A025770_01 |    | 0.282     | 0.161  | -0.066   | -0.01     | 0.088  | 0.174     | 0.311     | 0.295  |
| A025772_01 |    | 0.117     | 0.455  | -0.575   | -0.48     | 0.408  | 0.476     | 0.443     | 0.674  |
| A025776_01 |    | -0.721 NA |        | 0.476    | 0.412     | 0.211  | 0.24      | 0.086     | -0.008 |
| A025777_01 |    | -0.033 NA |        | -0.354   | -0.233 NA |        | -0.772    | 0.023     | 0.009  |
| A025778_01 |    | 0.365 NA  |        | 0.042    | 0.214 NA  |        | -0.285    | -0.482    | -0.504 |
| A025780_01 |    | -0.028 NA |        | 0.315    | 0.179 NA  | NA     |           | 0.09      | -0.047 |
| A025785_01 |    | 0.056     | -0.054 | 0.024    | 0.002     | -0.103 | -0.271    | 0.072     | -0.185 |
| A025787_01 |    | 0.192     | -0.033 | -0.302   | -0.404    | 0.121  | 0.353     | 0.025     | -0.14  |
| A025788_01 |    | 0.19      | 0.35   | 0.093    | 0.171     | 0.344  | 0.545     | -0.029    | 0.1    |
| A025795_01 |    | -0.986    | -1.024 | -0.169   | -0.338    | 0.072  | 0.354     | 0.417     | 0.382  |
| A025798_01 |    | 0.381     | 0.297  | -0.019   | 0.045     | 0.186  | -0.04     | -0.029    | 0.035  |
| A025799_01 |    | 0.412     | 0.402  | -0.048   | 0.083     | -0.217 | -0.211    | -0.288    | -0.363 |
| A025803_01 |    | -0.192    | -0.235 | 0.114    | -0.121    | -0.198 | -0.269    | -0.025 NA |        |
| A025804_01 |    | 0.2       | 0.017  | 0.15     | -0.012    | -0.182 | -0.453    | 0.007     | -0.106 |
| A025807_01 |    | -0.174 NA |        | -0.386   | 0.29 NA   | NA     |           | -0.012    | 0.435  |
| A025814_01 |    | -0.088    | -0.418 | 0.467    | 0.166     | -0.786 | -1.145    | -0.175    | -0.383 |
| A025818_01 |    | 0.221     | 0.079  | 0.113    | 0.234     | 0.188  | 0.208     | -0.184    | -0.434 |
| A025825_01 |    | 0.404     | 0.4 NA |          | -0.3      | 0.643  | 0.673 NA  |           | 0.034  |
| A025827_01 |    | 0.346     | 0.056  | 0.013    | 0.105     | 0.059  | -0.117    | 0.168     | -0.098 |
| A025828_01 |    | 0.646 NA  |        | 0.756    | 0.513 NA  | NA     |           | 0.042     | 0.091  |
| A025844_01 |    | -0.563    | -0.628 | 0.003    | -0.207    | -0.062 | -0.405    | -0.065    | -0.142 |
| A025846_01 |    | -0.024 NA |        | -0.022   | 0.092 NA  |        | -1.166    | -0.1      | -0.264 |
| A025847_01 |    | 0.108     | -0.011 | 0.021    | -0.013    | -0.61  | -0.945    | -0.214    | -0.324 |
| A025849_01 |    | 0.139 NA  |        | -0.397   | -0.143 NA | NA     |           | -0.331    | -0.833 |
| A025861_01 |    | 0.256     | 0.424  | -0.149   | 0.184     | -0.079 | 0.431     | -0.321    | -0.082 |
| A025867_01 |    | -0.109 NA |        | 0.121    | 0.115 NA  |        | -0.132    | -0.018    | -0.183 |
| A025868_01 |    | -0.362    | -0.19  | 0.679    | 0.668     | 0.485  | 0.79      | -0.513    | -0.244 |
| A025869_01 |    | 0.139     | 0.23   | -0.197   | -0.188    | 0.236  | 0.385     | -0.204    | -0.169 |
| A025870_01 |    | -0.187    | -0.141 | 0.45     | 0.556     | -0.199 | -0.101    | -0.113    | -0.253 |
| A025872_01 |    | 0.229 NA  |        | 0.332    | 0.354     | 0.919  | 1.01      | 0.147     | 0.044  |
| A025873_01 |    | 0.995     | 0.839  | -0.146   | -0.196 NA |        | -0.167    | 0.127     | 0.35   |
| A025874_01 |    | 0.447 NA  |        | 0.207    | -0.128 NA | NA     | NA        |           | -0.036 |
| A025878_01 |    | -0.103    | -0.18  | -0.021   | 0.011     | -0.037 | -0.052    | 0.063     | -0.286 |
| A025887_01 |    | 0.188     | 0.375  | 0.183    | 0.325     | 0.083  | 0.231     | -0.171    | 0.035  |
| A025896_01 |    | 0.146     | 0.164  | 0.025    | 0.049     | 0.314  | 0.533     | 0.4       | 0.561  |
| A025899_01 |    | -0.134    | 0.108  | 0.02     | 0.028     | -0.103 | -0.105    | -0.141    | 0.042  |
| A025900_01 |    | 0.183     | 0.216  | 0.176    | 0.172     | -0.236 | -0.247    | -0.547    | -0.524 |
| A025901_01 |    | -0.524    | -0.08  | 0.172    | 0.132     | -0.188 | -0.188    | -0.156    | -0.002 |
| A025908_01 |    | 0.171     | 0.053  | 0.002    | 0.085     | 0.004  | 0.007     | 0.06      | -0.011 |
| A025909_01 |    | 0.12      | 0.014  | 0.158    | 0.18      | -0.216 | -0.295    | 0.123     | -0.154 |
| A025910_01 |    | -0.337    | -0.217 | 0.862    | 0.763     | 0.683  | 0.763     | -0.138    | -0.193 |

|            |    |           |          |           |           |        |           |        |        |
|------------|----|-----------|----------|-----------|-----------|--------|-----------|--------|--------|
| A025911_01 |    | -1.024    | -1.796   | -2.609    | -2.551    | -2.581 | -2.689    | -2.205 | -2.042 |
| A025916_01 |    | 0.61      | 0.26     | 0.013     | -0.186    | 0.312  | 0.276     | 0.08   | 0.058  |
| A025918_01 |    | 0.156     | 0.092    | -0.056    | 0.168     | -0.127 | -0.162    | 0.052  | -0.104 |
| A025920_01 |    | 0.092     | 0.129    | 0.017     | 0.037     | -0.034 | 0.06      | -0.272 | -0.222 |
| A025922_01 |    | 0.137     | -0.023   | 0.028     | -0.088    | 0.087  | 0.142     | -0.247 | -0.42  |
| A025924_01 |    | 0.301     | 0.289    | -0.108    | -0.076    | 0.213  | 0.281     | -0.069 | -0.197 |
| A025929_01 |    | -0.308    | -0.414   | -0.002    | -0.034    | -0.906 | -0.995    | 0.112  | -0.04  |
| A025931_01 |    | -0.172 NA |          | 0.315     | 0.065 NA  | NA     |           | 0.029  | 0.049  |
| A025937_01 |    | 0.337     | 0.089    | -0.099    | -0.31     | 0.174  | 0.11      | 0.457  | 0.243  |
| A025939_01 |    | 0.217     | 0.069    | 0.101     | 0.186     | 0.264  | 0.402     | 0.054  | -0.008 |
| A025941_01 |    | 0.296     | 0.264    | 0.061     | 0.094     | -0.467 | -0.734    | -0.123 | -0.152 |
| A025942_01 |    | -1.11     | -0.957   | -0.119    | -0.174    | 0.129  | 0.291     | 0.391  | 0.478  |
| A025944_01 |    | -0.439 NA |          | -0.108    | -0.256 NA | NA     | NA        | NA     |        |
| A025947_01 |    | -0.047    | -0.191   | 0.742     | 0.475     | 0.837  | 1.037     | -0.089 | -0.043 |
| A025949_01 |    | 0.117     | 0.284    | 0.007     | 0.162     | 0.147  | 0.096     | -0.041 | -0.115 |
| A025951_01 |    | -0.277    | -0.113   | -0.016    | -0.047    | -0.301 | -0.265    | -0.011 | 0.129  |
| A025956_01 |    | 0.499     | 0.597    | 0.021     | 0.308     | -0.068 | -0.108 NA |        | -0.182 |
| A025957_01 |    | -0.002    | 0.226    | 0.185     | 0.214     | -0.973 | -1.071    | -0.171 | -0.209 |
| A025958_01 |    | -0.309    | -0.349   | 0.442     | 0.512     | -0.009 | 0.093     | -0.054 | -0.279 |
| A025959_01 |    | -0.161    | -0.149   | 0.362     | 0.444     | 0.551  | 0.616     | 0.07   | 0.08   |
| A025961_01 |    | -0.194    | 0.175    | -0.393    | -0.395    | 0.179  | 0.359     | 0.262  | 0.4    |
| A025962_01 |    | 0.242     | 0.232    | 0.215     | 0.273     | 0.062  | -0.159    | 0.04   | 0.127  |
| A025963_01 |    | 0.295     | 0.136    | -0.158    | -0.02     | -0.281 | -0.21     | -0.018 | 0.055  |
| A025965_01 |    | 0.433     | 0.281    | 0.328     | 0.182     | -0.269 | -0.769    | -0.173 | -0.243 |
| A025969_01 |    | -0.179    | -0.175   | -0.176    | -0.116    | -1.063 | -0.834    | -0.481 | -0.19  |
| A025970_01 |    | -0.491 NA |          | -0.04     | 0.036     | -0.214 | -0.226    | -0.121 | -0.087 |
| A025971_01 |    | 0.418     | 0.292    | 0.549     | 0.34      | 0.173  | -0.09     | -0.249 | -0.382 |
| A025975_01 |    | 0.114 NA  |          | 0.121     | 0.025 NA  | NA     | NA        | NA     |        |
| A025978_01 |    | -0.134    | -0.312   | 0.311     | 0.31      | -0.293 | -0.765    | -0.013 | -0.092 |
| A025984_01 |    | -0.709    | -0.631   | -0.462    | -0.575    | -0.452 | -0.387    | 0.308  | 0.499  |
| A025986_01 |    | 0.097     | 0.155    | -0.049    | 0.09      | 0.103  | 0.114     | 0      | -0.035 |
| A025990_01 |    | 0.241     | 0.091    | 0.135     | 0.171     | -0.672 | -0.98     | -0.583 | -0.723 |
| A025991_01 |    | -0.107    | 0.05     | -0.02     | 0.377     | -0.294 | 0.073     | -0.099 | -0.078 |
| A025992_01 |    | 0.37      | 0.091    | -0.126    | -0.216    | 0.154  | 0.038     | -0.098 | -0.149 |
| A025995_01 |    | 0.727     | 0.399    | 0.301     | 0.007     | 0.246  | -0.08     | 0.097  | -0.073 |
| A025997_01 |    | 0.436     | 0.598    | -0.044    | 0.075     | -0.236 | -0.52     | -0.1   | -0.231 |
| A025998_01 |    | 0.376     | 0.532    | -0.313    | -0.26     | -0.01  | -0.031    | 0.03   | 0.114  |
| A026002_01 |    | 0.105     | 0.129    | -0.012    | -0.114    | -0.593 | -0.912    | -0.2   | -0.307 |
| A026004_01 |    | 0.292     | 0.409    | 0.295     | 0.123     | 0.619  | 0.714     | -0.15  | -0.054 |
| A026013_01 | NA | NA        |          | -0.2 NA   |           | -0.283 | -0.413 NA |        | 0.097  |
| A026014_01 |    | 0.054     | 0.099    | 0.238     | 0.261     | 0.285  | 0.26      | -0.063 | -0.056 |
| A026015_01 |    | -0.321    | -0.043   | -0.029    | -0.189    | -0.391 | -0.599    | -0.107 | -0.087 |
| A026017_01 |    | 0.305     | 0.292    | 0.166     | 0.237     | -0.085 | -0.22     | -0.069 | -0.184 |
| A026024_01 |    | 0.033     | 0.191    | 0.113     | -0.106    | -0.069 | 0.046 NA  |        | 0.031  |
| A026026_01 |    | 0.316 NA  |          | 0.046     | 0.044 NA  | NA     |           | -0.406 | -0.347 |
| A026043_01 |    | 0.095     | 0.238    | -0.205    | -0.236    | 0.106  | 0.156     | 0.162  | 0.039  |
| A026057_01 |    | 0.221     | 0.096    | 0.149     | 0.141     | 0.076  | -0.005    | -0.11  | -0.274 |
| A026062_01 |    | -0.22 NA  |          | -0.202    | -0.29     | 0.478  | 0.435 NA  |        | -0.36  |
| A026078_01 |    | 0.425     | 0.235    | -0.008    | 0.031     | -0.426 | -0.582    | 0.2    | -0.048 |
| A026081_01 |    | 0.093     | 0.023    | 0.247     | 0.116     | 0.228  | 0.001     | -0.252 | -0.286 |
| A026082_01 |    | -0.277    | -0.173   | -0.323    | -0.114    | 0.031  | 0.251     | -0.054 | -0.056 |
| A026083_01 |    | 0.267     | 0.134 NA |           | -0.282    | -0.214 | -0.161    | -0.023 | 0.191  |
| A026086_01 |    | 0.214 NA  |          | 0.291     | 0.178 NA  |        | -0.25     | -0.092 | -0.091 |
| A026087_01 |    | 0.189     | 0.095    | 0.3       | 0.347     | -0.122 | 0.046     | -0.366 | -0.275 |
| A026089_01 |    | -0.793    | -0.572   | -0.143    | -0.128    | -0.851 | -1.088    | 0.171  | 0.049  |
| A000178_01 | NA |           | -0.333   | -1.1      | -0.431 NA |        | -1.006 NA | NA     |        |
| A000194_01 |    | -0.298    | 0.248    | -0.361 NA |           | -0.069 | 0.133 NA  | NA     |        |
| A000195_01 | NA |           | -0.039   | -0.658    | -0.112    | -0.3   | -0.136 NA | NA     |        |
| A000463_01 | NA |           | 0.377    | 0.142     | 0.141 NA  |        | 0.624     | -0.182 | 0.216  |
| A000605_01 | NA |           | 0.074    | -0.084    | 0.259 NA  |        | 0.154 NA  | NA     |        |
| A000683_01 | NA | NA        |          | -0.561 NA | NA        |        | 0.554 NA  |        | 0.542  |
| A000724_01 | NA |           | -0.162   | -0.079    | -0.012    | -0.278 | 0.003 NA  | NA     |        |
| A000790_01 |    | -0.82     | -0.424   | -0.135    | 0.144     | 1.083  | 1.505     | -0.482 | 0.224  |
| A000902_01 | NA |           | 0.079    | 0.439     | 0.519     | 0.225  | 0.199     | -0.1   | 0.19   |
| A000979_01 | NA |           | 0.294    | -0.151    | 0.38      | -0.007 | 0.245 NA  | NA     |        |
| A001111_01 |    | -0.238 NA | NA       | NA        | NA        |        | 0.475 NA  |        | 0.671  |
| A001151_01 | NA | NA        |          | 0.117     | 0.235     | 0.492  | 0.825     | 0.113  | 0.388  |
| A001316_01 |    | -0.22     | -0.186   | 0.289     | 0.385     | 0.352  | 0.372     | -0.028 | 0.04   |

|            |    |        |        |        |        |        |        |        |        |        |
|------------|----|--------|--------|--------|--------|--------|--------|--------|--------|--------|
| A001383_01 | NA |        | -0.062 | -0.142 | 0.041  | -0.038 | 0.013  | NA     | NA     |        |
| A001433_01 |    | 0.203  | 0.191  | 0.073  | 0.087  | 0.067  | 0.12   | NA     |        | -0.215 |
| A001509_01 |    | -0.271 | NA     | NA     | 0.107  | NA     | NA     | NA     |        | 0.732  |
| A001594_01 |    | -0.1   | NA     |        | 0.057  | -0.174 | -0.226 | NA     |        | -0.063 |
| A001600_01 |    | 0.073  | 0.383  | 0.108  | 0.339  | 0.333  | 0.57   |        | -0.074 | 0.24   |
| A001888_01 |    | -0.335 | NA     |        | 0.269  | 0.178  | NA     | 0.183  | NA     | NA     |
| A002042_01 | NA |        | -0.119 | 0.141  | 0.354  | NA     | -0.292 | NA     | NA     |        |
| A002060_01 | NA |        | -0.207 | 0.005  | 0.142  | NA     | 0.035  | 0.348  |        | 0.175  |
| A002084_01 |    | 0.353  | 0.512  | NA     | -0.164 | 0.365  | 0.679  | NA     | NA     |        |
| A002107_01 | NA | NA     |        | -0.209 | -0.067 | NA     | 0.112  | 0.181  | NA     | NA     |
| A002404_01 | NA |        | -0.056 | -0.051 | 0.119  | NA     | 0.366  | NA     | NA     |        |
| A002434_01 | NA |        | 0.162  | -0.201 | 0.027  | NA     | 0.153  |        | -0.155 | 0.146  |
| A002621_01 |    | -0.278 | NA     | -0.047 | NA     | NA     | NA     | NA     |        | 0.435  |
| A002778_01 | NA | NA     |        | -0.044 | 0.025  | NA     | 0.363  | NA     | NA     |        |
| A002947_01 |    | -0.479 | -0.119 | -0.142 | NA     |        | 0.121  |        | -0.329 | -0.04  |
| A003123_01 | NA | NA     |        | 0.669  | 0.484  | 1.062  | 1.373  | 0.341  | NA     |        |
| A003140_01 |    | -0.016 | 0.015  | -0.176 | 0.058  | 0.286  | 0.731  | 0.241  | NA     |        |
| A003218_01 | NA | NA     |        | 0.146  | 0.039  | NA     | 0.186  | 0.149  |        | 0.366  |
| A003526_01 |    | -0.46  | -0.252 | -0.626 | -0.64  | 0.256  | 0.691  | NA     | NA     |        |
| A003659_01 |    | -0.331 | NA     | NA     | -0.051 | NA     | NA     | NA     |        | -0.14  |
| A003766_01 |    | -0.319 | NA     | 0.64   | 0.619  | 1.397  | 1.581  | NA     |        | 0.521  |
| A003859_01 |    | -0.032 | NA     | -0.939 | -0.78  | NA     | -0.64  |        | -0.776 | NA     |
| A004129_01 |    | -0.351 | NA     | -0.271 | -0.08  |        | -0.308 | -0.035 |        | -0.615 |
| A004135_01 |    | -0.111 | 0.125  | 0.13   | 0.25   | 0.064  | -0.095 |        | -0.004 | -0.126 |
| A004159_01 |    | -0.111 | NA     | 0.136  | 0.259  | -0.188 | -0.099 |        | -0.047 | 0.132  |
| A004334_01 | NA |        | -0.185 | 0.344  | 0.141  | 0.464  | 0.539  | NA     | NA     | 0.182  |
| A004387_01 | NA |        | 0.401  | 0.23   | 0.099  | NA     | 0.021  | NA     | NA     |        |
| A004423_01 | NA |        | 0.065  | 0.014  | -0.205 | 0.035  | 0.005  | 0.047  | NA     |        |
| A004572_01 |    | 0.04   | NA     | 0.595  | 0.583  | 0.159  | 0.425  |        | -0.351 | -0.273 |
| A004660_01 | NA |        | -0.301 | 0.322  | 0.315  | NA     | 0.003  | NA     | NA     |        |
| A004672_01 | NA |        | 0.254  | 0.577  | 0.461  | 0.595  | 0.47   |        | -0.102 | NA     |
| A004702_01 | NA | NA     |        | -0.075 | 0.336  | NA     | 0.374  |        | -0.058 | 0.108  |
| A004773_01 | NA | NA     |        | -0.118 | -0.058 | NA     | -0.021 |        | -0.011 | NA     |
| A005189_01 | NA | NA     |        | -0.28  | -0.415 | NA     | -0.551 |        | 0.168  | 0.308  |
| A005374_01 |    | -0.124 | NA     | 0.074  | 0.145  | NA     | -0.123 | NA     | NA     |        |
| A005392_01 |    | -1.62  | -1.417 | -0.018 | -0.06  | 1.068  | 1.669  | 0.528  |        | 0.879  |
| A005515_01 |    | -0.009 | 0.182  | 0.132  | -0.152 | 0.098  | -0.019 |        | -0.181 | NA     |
| A005561_01 | NA |        | 0.206  | 0.089  | 0.126  | 0.118  | -0.046 | 0.106  |        | 0.001  |
| A005682_01 |    | -0.214 | 0.129  | -0.557 | -0.217 | 0.068  | 0.522  | 0.362  | NA     |        |
| A005848_01 | NA | NA     |        | -0.112 | 0.043  | NA     | -0.192 |        | -0.013 | 0.107  |
| A006047_01 |    | 0.008  | NA     | 0.332  | 0.289  | NA     | -0.165 | NA     |        | -0.021 |
| A006139_01 | NA | NA     |        | 0.177  | -0.024 | NA     |        |        | -0.045 | -0.271 |
| A006166_01 |    | -1.083 | -1.015 | -0.144 | -0.215 | -0.689 | -0.17  |        | -0.565 | -0.461 |
| A006192_01 | NA |        | 0.395  | -0.107 | 0.09   | NA     | 0.101  | NA     | NA     |        |
| A006198_01 | NA |        | -0.419 | -0.15  | 0.065  | NA     | -0.5   |        | 0.151  | NA     |
| A006299_01 | NA |        | 0.257  | 0.041  | 0.097  | NA     | 0.24   |        | -0.037 | -0.066 |
| A006359_01 | NA | NA     |        | -0.122 | -0.082 | NA     | 0.294  | NA     | NA     |        |
| A006535_01 | NA | NA     |        | -0.403 | -0.191 | NA     | 0.286  | NA     | NA     |        |
| A006561_01 |    | -0.017 | NA     | 0.074  | NA     | NA     | 0.2    | NA     | NA     |        |
| A006584_01 |    | -0.413 | -0.357 | 0.156  | 0.052  | NA     | 0.404  | NA     | NA     |        |
| A006587_01 |    | -0.033 | NA     | -0.241 | NA     | NA     | 0.365  | NA     | NA     |        |
| A006588_01 |    | -0.051 | NA     | -0.124 | 0.105  | NA     | 0.302  | NA     | NA     |        |
| A006590_01 | NA |        | -0.06  | -0.094 | -0.101 | NA     | -0.099 | 0.06   |        | 0.175  |
| A006602_01 | NA |        | -0.084 | -0.141 | -0.015 | NA     | 0.061  |        | -0.148 | NA     |
| A006638_01 | NA |        | 0.115  | -0.469 | -0.067 | NA     | 0.31   |        | 0.179  | 0.083  |
| A006655_01 | NA |        | -0.081 | NA     | -0.396 | NA     | -0.185 | NA     | NA     |        |
| A006661_01 |    | -0.093 | 0.23   | -0.045 | -0.13  | 0.084  | -0.143 |        | 0.097  | 0.078  |
| A006741_01 |    | 0.124  | NA     | 0.059  | 0.184  | NA     | 0.207  | NA     |        | -0.049 |
| A006970_01 | NA |        | -0.168 | 0.178  | 0.252  |        | -0.26  | -0.354 |        | -0.071 |
| A007125_01 | NA |        | 0.504  | -0.606 | 0.342  | NA     | -0.125 | NA     |        | 0.844  |
| A007270_01 |    | 0.046  | -0.148 | -0.236 | -0.406 | 0.397  | 0.171  |        | 0.263  | 0.144  |
| A007326_01 | NA |        | -0.032 | 0.031  | 0.081  | -0.051 | 0.148  |        | -0.006 | 0.446  |
| A007344_01 |    | 0.248  | 0.104  | -0.079 | -0.113 | 0.255  | 0.145  |        | 0.08   | NA     |
| A007439_01 | NA |        | 0.251  | -0.24  | -0.114 | NA     | -0.199 | NA     | NA     |        |
| A007540_01 | NA | NA     |        | 0.991  | 1.084  | 1.348  | 1.578  | 0.266  |        | 0.453  |
| A007611_01 |    | 0.095  | NA     | 0.174  | 0.414  | 0.348  | 0.494  | NA     | NA     |        |
| A007679_01 |    | -0.396 | 0.234  | NA     | NA     | 0.169  | 0.535  |        | 0.004  | 0.789  |
| A007700_01 | NA |        | -0.036 | -0.214 | 0.05   | -0.189 | -0.1   |        | 0.087  | NA     |

|            |    |           |          |           |           |        |           |           |        |
|------------|----|-----------|----------|-----------|-----------|--------|-----------|-----------|--------|
| A007742_01 | NA |           | 0.107    | 0.084     | 0.056     | 0.447  | 0.381     | -0.698    | -0.573 |
| A007802_01 |    | -0.28 NA  |          | -0.047    | 0.055     | 0.3    | 0.529 NA  |           | 0.177  |
| A007819_01 | NA |           | -0.149   | -0.081    | -0.039    | 0.086  | 0.263     | -0.016    | 0.204  |
| A007828_01 |    | -0.25 NA  |          | 0.306     | 0.512     | -0.104 | 0.183     | -0.138    | -0.001 |
| A007839_01 |    | -0.719 NA | NA       |           | 0.2       | -0.601 | -0.398    | -0.585    | -0.15  |
| A007867_01 | NA |           | -0.048   | -0.251    | -0.131 NA |        | -0.013    | 0.354     | 0.25   |
| A007882_01 |    | -0.025 NA |          | -0.19 NA  | NA        |        | 0.06 NA   |           | 0.042  |
| A007997_01 |    | -0.223    | -0.262   | -0.076    | -0.068 NA |        | -0.078    | 0.125     | 0.215  |
| A008030_01 |    | -0.043 NA |          | -0.021    | 0.016 NA  | NA     |           | 0.046     | 0.138  |
| A008034_01 |    | -0.02 NA  |          | 0.273     | 0.18 NA   | NA     | NA        |           | -0.019 |
| A008278_01 |    | 0.153 NA  |          | 0.198 NA  | NA        |        | 0.2 NA    |           | -0.06  |
| A008284_01 |    | -0.462 NA |          | 0.17      | 0.202     | 0.752  | 1.067     | 0.578     | 0.634  |
| A008609_01 | NA |           | -0.322   | -0.033    | 0.034 NA  |        | -0.008 NA | NA        |        |
| A008620_01 | NA |           | -0.35    | -0.041    | 0.187 NA  |        | -0.136 NA | NA        |        |
| A008712_01 | NA |           | -0.13    | -1.058    | -1.017    | -1.469 | -1.548    | -0.141    | -0.031 |
| A008935_01 | NA |           | -0.329   | 0.438     | 0.645 NA  |        | 0.019     | -0.528 NA |        |
| A009025_01 | NA |           | -1.028   | 1.122     | 1.173     | 1.171  | 1.741 NA  | NA        |        |
| A009197_01 |    | 0.07      | -0.209   | -0.055    | 0.188     | -0.041 | 0.043 NA  | NA        |        |
| A009232_01 | NA | NA        |          | 0.334     | 0.156 NA  |        | -0.164    | 0.084 NA  |        |
| A009254_01 |    | -0.151    | -0.11    | -0.135    | -0.11     | -0.349 | -0.365    | -0.152    | -0.031 |
| A009259_01 |    | -0.651    | -0.713   | 0.212     | 0.134     | 0.932  | 1.362     | 0.558     | 0.709  |
| A009332_01 |    | -1.165    | -1.29    | 1.11      | 1.156     | 1.592  | 2.161     | 0.793     | 0.881  |
| A009654_01 |    | 0.298     | 0.226    | 0.084     | 0.295     | 0.223  | 0.22      | 0.183     | 0.06   |
| A009749_01 | NA |           | -0.128   | -0.107    | -0.107    | -0.02  | -0.042    | 0.189 NA  |        |
| A009945_01 |    | -0.078 NA |          | 0.179     | 0.1 NA    |        | -0.063    | 0.118     | 0.209  |
| A010046_01 | NA |           | 0.111    | -0.255    | -0.127    | -0.104 | 0.022     | -0.054    | 0.239  |
| A010070_01 | NA |           | -0.287   | 0.428     | 0.111 NA  |        | -0.281 NA | NA        |        |
| A010280_01 |    | 0.041 NA  |          | 0.321     | 0.345 NA  |        | -0.085 NA |           | 0.129  |
| A010408_01 |    | -0.021    | 0.028    | -0.031    | -0.01 NA  |        | -0.013 NA | NA        |        |
| A010432_01 | NA |           | -0.279   | -0.261    | -0.107    | -0.066 | -0.233 NA | NA        |        |
| A010479_01 | NA |           | -0.955   | 0.506     | 0.327     | 0.844  | 0.945 NA  | NA        |        |
| A010550_01 | NA | NA        |          | 0.062     | 0.097 NA  |        | -0.262    | 0.06      | -0.105 |
| A010630_01 |    | 0.033 NA  | NA       |           | 0.167     | 0.161  | 0.142 NA  |           | 0.241  |
| A010702_01 |    | 0.138 NA  |          | -0.217    | -0.226    | -0.514 | -0.649 NA |           | -0.596 |
| A010770_01 |    | 0.227     | 0.054    | 0         | -0.06     | 0.178  | 0.227     | -0.641 NA |        |
| A010800_01 | NA |           | 0.163    | -0.064    | 0.087 NA  |        | 0.379     | 0.077 NA  |        |
| A010889_01 | NA |           | -0.086   | 0.077     | 0.068 NA  |        | -0.066 NA | NA        |        |
| A010924_01 |    | -0.085 NA |          | -0.193    | -0.018 NA | NA     | NA        |           | -0.01  |
| A010967_01 |    | -2.053    | -1.88 NA |           | -1.383    | 0.433  | 0.926 NA  |           | -0.502 |
| A010984_01 |    | 0.379     | 0.136    | -0.063    | -0.067    | 0.43   | 0.307     | 0.211     | 0.015  |
| A010986_01 |    | 0.326     | 0.313    | -0.367    | -0.131    | -0.232 | 0.063     | 0.071     | 0.233  |
| A011239_01 | NA |           | -0.076   | 0.112     | 0.201 NA  |        | -0.493    | 0.196     | -0.027 |
| A011702_01 |    | -0.75     | -0.976   | 0.642     | 0.783     | 1.292  | 1.809 NA  |           | 0.519  |
| A011934_01 | NA |           | -0.008   | -0.109    | 0.087 NA  |        | 0.265 NA  | NA        |        |
| A011958_01 | NA |           | 0.291 NA |           | -0.02 NA  |        | -0.032    | 0.081     | -0.011 |
| A012029_01 | NA |           | -0.404   | 0.218     | 0.202     | -0.414 | -0.372    | -0.44     | -0.792 |
| A012053_01 |    | -0.117    | -0.111   | -0.145    | -0.357    | 0.206  | 0.231 NA  | NA        |        |
| A012261_01 |    | 0.335 NA  |          | -0.188    | 0.072     | 0.12   | 0.244 NA  |           | -0.116 |
| A012345_01 |    | 0.361 NA  |          | 0.003     | -0.022    | 0.289  | 0.429 NA  |           | -0.085 |
| A012409_01 | NA | NA        |          | -0.007    | 0.135 NA  |        | -0.776 NA | NA        |        |
| A012427_01 | NA |           | 0.153    | 0.543     | 0.504 NA  |        | 0.019     | -0.063 NA |        |
| A012433_01 |    | -0.468 NA | NA       | NA        | NA        |        | 0.499     | 0.107     | 0.321  |
| A012676_01 | NA |           | -0.046   | 0.431     | 0.565     | 0.05   | 0.144     | -0.673    | -0.816 |
| A012743_01 |    | 0.255 NA  |          | 0.053 NA  | NA        |        | 0.217 NA  |           | 0.096  |
| A013121_01 | NA |           | 0.208    | -0.148    | -0.063 NA |        | 0.404 NA  | NA        |        |
| A013400_01 | NA | NA        |          | 0.173     | 0.068 NA  |        | -0.142    | -0.049 NA |        |
| A013826_01 |    | -0.098    | 0.028    | -0.067    | -0.225    | 0.153  | 0.014     | 0.087     | 0.09   |
| A014261_01 | NA | NA        |          | 0.104     | 0.218 NA  |        | 0.131     | -0.03     | -0.293 |
| A014327_01 | NA | NA        |          | 0.011     | -0.092 NA |        | 0.118     | 0.186 NA  |        |
| A014482_01 |    | -0.02 NA  |          | 0.049     | 0.085 NA  |        | 0.216 NA  | NA        |        |
| A015221_01 |    | 0.209 NA  |          | 0.053     | -0.035 NA | NA     | NA        |           | -0.059 |
| A015419_01 | NA | NA        |          | -0.367    | -0.51 NA  |        | -0.336    | -0.505    | -0.74  |
| A015597_01 | NA |           | -0.262   | -0.271 NA | NA        |        | -0.453 NA | NA        |        |
| A015680_01 | NA |           | -0.173   | 0.122     | 0.077 NA  |        | -0.296 NA | NA        |        |
| A015726_01 | NA | NA        |          | 0.219     | 0.051     | -0.058 | 0.192 NA  | NA        |        |
| A015821_01 |    | 0.348 NA  |          | -0.039    | -0.176 NA |        | -0.19 NA  |           | 0.088  |
| A015829_01 | NA |           | -0.151   | -0.056    | -0.252 NA |        | -0.278 NA | NA        |        |
| A016078_01 | NA |           | -0.147   | 0.371     | 0.247 NA  |        | -0.082 NA | NA        |        |

|            |    |           |           |           |           |        |           |           |        |
|------------|----|-----------|-----------|-----------|-----------|--------|-----------|-----------|--------|
| A016171_01 |    | -0.577    | -0.411    | 0.545     | 0.564     | 1.042  | 1.578     | 0.501     | 0.887  |
| A016256_01 |    | 0.008     | -0.458    | 0.739     | 0.508     | 0.184  | 0.21      | 0.045     | -0.004 |
| A016280_01 |    | 0.037 NA  |           | 0.154     | -0.004    | 0.591  | 0.34 NA   | NA        |        |
| A016737_01 | NA |           | -0.068    | -0.079    | -0.041    | -0.698 | -0.713    | -0.287    | -0.307 |
| A016743_01 | NA | NA        |           | -0.022    | -0.165 NA |        | 0.168     | 0.191     | 0.036  |
| A016766_01 | NA | NA        |           | 0.081 NA  |           | 1.322  | 1.529     | 1.11      | 0.802  |
| A016874_01 | NA | NA        |           | 1.039     | 0.797     | 0.994  | 1.085     | -0.135 NA |        |
| A016906_01 |    | -0.315 NA |           | -2.811    | -2.333    | 0.942  | 1.104     | -0.414    | -0.641 |
| A016921_01 | NA |           | 0.271     | -0.47     | -0.176 NA |        | 0.126     | 0.226 NA  |        |
| A016963_01 | NA | NA        |           | 0.354     | 0.323 NA  |        | 0.173 NA  | NA        |        |
| A017319_01 |    | 0.17      | -0.036    | 0.062     | -0.064    | 0.35   | 0.542     | -0.292    | -0.255 |
| A017543_01 | NA | NA        |           | -0.157    | -0.249 NA |        | 0.148     | 0.2       | 0.387  |
| A017592_01 | NA | NA        |           | -0.225    | -0.147 NA |        | 0.059     | 0.195     | 0.29   |
| A017615_01 |    | 0.264 NA  |           | 0.562     | 0.414 NA  |        | -0.032    | 0.233     | 0.116  |
| A017639_01 | NA | NA        |           | 0.163     | -0.109 NA |        | 0.102     | 0.255     | 0.165  |
| A017675_01 | NA |           | 0.31      | -0.183    | -0.219 NA |        | -0.525 NA | NA        |        |
| A017696_01 |    | 0.456 NA  |           | -0.528    | -0.647    | 0.618  | 0.739     | 0.397     | 0.306  |
| A017708_01 |    | 0.223 NA  |           | 0.003 NA  | NA        |        | 0.112 NA  | NA        |        |
| A018180_01 |    | -0.274    | -0.389    | 0.272     | -0.01 NA  |        | -1.202 NA | NA        |        |
| A018346_01 |    | 0.069     | 0.004     | -0.45     | -0.501    | 0.137  | 0.426     | 0.106 NA  |        |
| A018376_01 | NA | NA        |           | -0.173    | -0.194 NA |        | 0.005     | 0.064 NA  |        |
| A018459_01 |    | 0.461     | 0.038     | -0.232    | 0.022     | 0.098  | 0.203 NA  | NA        |        |
| A018525_01 | NA | NA        | NA        | NA        | NA        |        | 0.134 NA  | NA        |        |
| A018642_01 |    | 0.075 NA  |           | 0.072     | 0.079 NA  |        | -0.661    | -0.06     | -0.444 |
| A018791_01 |    | -0.344    | -0.054    | 0.069     | 0.053     | -0.162 | -0.099    | -0.255    | -0.287 |
| A018839_01 |    | 0.089     | 0.115     | 0.295     | 0.016     | 0.238  | 0.238 NA  | NA        |        |
| A019083_01 |    | -0.198    | -0.113    | 0.103     | -0.08     | 0.081  | 0.153     | 0.173     | 0.042  |
| A019129_01 |    | 0.186     | -0.029    | -0.001    | 0.057     | -0.194 | -0.253    | -0.147 NA |        |
| A019148_01 |    | 0.213     | 0         | -0.003    | 0.073     | 0.39   | 0.656     | -0.011    | -0.176 |
| A019207_01 | NA |           | 0.262 NA  |           | -0.361 NA |        | 0.227     | 0.469 NA  |        |
| A019260_01 |    | 0.051 NA  |           | 0.064     | -0.031    | 0.161  | 0.149     | 0.158     | 0.033  |
| A019316_01 | NA | NA        |           | -0.014    | 0.1 NA    |        | -0.092 NA |           | -0.166 |
| A019339_01 |    | 0.486 NA  |           | -0.214    | 0.133     | -0.116 | -0.131 NA |           | -0.281 |
| A019441_01 |    | -0.112    | 0.254     | -0.059    | -0.027    | 0.081  | 0.507     | -0.266    | -0.051 |
| A019481_01 | NA | NA        |           | 0.063     | 0.003 NA  | NA     |           | 0.256     | 0.181  |
| A019507_01 |    | 0.144     | 0.309     | -0.289 NA |           | -0.027 | 0.154 NA  | NA        |        |
| A019546_01 | NA |           | 0.421     | 0.079     | -0.038 NA |        | 0.16 NA   | NA        |        |
| A019605_01 | NA |           | -0.315    | -0.157    | -0.103    | -0.016 | 0.081 NA  | NA        |        |
| A019623_01 | NA |           | 0.067     | 0.337     | 0.168     | 0.639  | 0.411     | 0.084     | 0.036  |
| A019735_01 |    | -0.285 NA |           | 0.572     | 0.352     | -0.145 | -0.075 NA | NA        |        |
| A019790_01 |    | -1.01     | -0.828 NA | NA        |           | 0.158  | 0.657 NA  |           | -0.221 |
| A019856_01 |    | -1.532    | -1.334 NA | NA        |           | 0.945  | 1.449 NA  |           | -0.302 |
| A019860_01 | NA |           | -0.424    | 0.05      | 0.344     | 0.28   | 0.557     | 0.403     | 0.44   |
| A019961_01 |    | 0.122     | 0.12      | -0.012    | -0.205    | 0.371  | 0.451     | 0.12      | 0.027  |
| A020003_01 | NA |           | -0.146    | 0.15      | 0.046     | 0.054  | 0.027 NA  | NA        |        |
| A020052_01 |    | -0.439 NA |           | -0.162    | -0.077 NA |        | -0.699    | -0.517    | -0.384 |
| A020094_01 |    | 0.068 NA  | NA        |           | -0.158    | 0.152  | 0.176 NA  |           | 0.072  |
| A020163_01 |    | -0.171 NA |           | 0.18      | 0.309     | 0.393  | 0.496 NA  |           | 0.156  |
| A020252_01 | NA |           | 0.163     | -0.001    | 0.302 NA  |        | -0.094 NA | NA        |        |
| A020391_01 | NA | NA        |           | -0.119 NA | NA        |        | -0.344 NA |           | -0.171 |
| A020483_01 |    | -0.1 NA   | NA        | NA        |           | 0.327  | 0.563 NA  |           | 0.569  |
| A020662_01 | NA | NA        |           | 0.039     | 0.103 NA  |        | -0.379 NA | NA        |        |
| A020698_01 |    | -0.378    | -0.136    | -0.019    | -0.159    | 0.439  | 0.672     | -0.008    | 0.238  |
| A020745_01 |    | 0.068     | 0.046     | -0.126    | -0.089    | -0.003 | 0.004 NA  | NA        |        |
| A020865_01 |    | 0.172 NA  |           | 0.899     | 0.843     | 1.527  | 1.816     | 0.725     | 0.398  |
| A020875_01 |    | -0.027    | -0.003    | 0.008 NA  | NA        |        | -0.052 NA | NA        |        |
| A020877_01 |    | -1.034    | -0.971    | 1.186     | 1.155     | 1.188  | 1.728     | 0.53      | 0.379  |
| A020895_01 |    | 0.307 NA  |           | 0.01 NA   | NA        |        | -0.317 NA | NA        |        |
| A020989_01 |    | 0.722     | 0.307     | -0.155    | -0.209 NA |        | -0.081 NA | NA        |        |
| A021075_01 |    | 0.105 NA  |           | 0.112     | -0.167    | 0.441  | 0.383 NA  |           | -0.077 |
| A021101_01 | NA |           | -0.094    | 0.55      | 0.32      | 0.26   | 0.391 NA  | NA        |        |
| A021199_01 |    | -0.037    | 0.13      | 0.302     | 0.068     | 0.134  | 0.15      | -0.408    | -0.349 |
| A021203_01 |    | 0.239     | 0.083     | -0.086    | -0.369 NA |        | 0.16      | 0.424     | 0.309  |
| A021404_01 |    | 0.043     | -0.013    | -0.083    | -0.075    | -0.204 | -0.15     | 0.333     | -0.023 |
| A021457_01 |    | 0.033     | 0.073     | -0.254 NA |           | -0.136 | 0.018 NA  | NA        |        |
| A021598_01 |    | -0.026 NA |           | 0.167     | -0.018 NA |        | -0.183 NA |           | -0.075 |
| A021618_01 |    | 0.45      | -0.003    | 0.197     | 0.1       | -0.388 | -0.588    | 0.167     | -0.002 |
| A021825_01 | NA |           | -0.557    | -0.985    | -1.165 NA |        | -0.743 NA | NA        |        |

|            |    |           |           |           |           |        |           |          |        |
|------------|----|-----------|-----------|-----------|-----------|--------|-----------|----------|--------|
| A021855_01 | NA |           | 0.064     | 0.139     | -0.012    | 0.192  | 0.313     | -0.122   | -0.354 |
| A022122_01 |    | -0.569    | -0.946    | -0.694    | -1.035    | 0.042  | 0.335 NA  | NA       |        |
| A022228_01 |    | 0.294 NA  |           | 0.208     | 0.072 NA  |        | 0.307     | 0.112    | -0.156 |
| A022508_01 | NA |           | -0.056    | 0.176     | 0.224 NA  |        | -0.374 NA | NA       |        |
| A022526_01 | NA | NA        |           | 0.461     | 0.352 NA  |        | -0.979 NA | NA       |        |
| A022621_01 | NA | NA        |           | 0.07      | -0.215 NA |        | -0.164 NA | NA       |        |
| A022710_01 |    | 0.257     | -0.029    | 0.003     | -0.21     | 0.154  | 0.05      | 0.156    | -0.135 |
| A022924_01 | NA |           | 0.464     | -0.142    | -0.003 NA |        | -0.969 NA | NA       |        |
| A023591_01 |    | 0.456 NA  | NA        |           | 0.287 NA  |        | 0.605 NA  | NA       |        |
| A023758_01 |    | -0.44 NA  |           | 0.837     | 0.662     | 0.505  | 0.889     | -0.437   | -0.074 |
| A023785_01 | NA |           | 0.074     | -0.218    | -0.235    | 0.246  | 0.113     | 0.237    | 0.227  |
| A023963_01 |    | -0.254 NA |           | -0.007    | -0.113 NA |        | -0.03 NA  | NA       |        |
| A024087_01 |    | 0.018     | -0.062    | 0.083     | -0.03     | 0.088  | 0.057 NA  | NA       |        |
| A024254_01 | NA | NA        |           | 0.741     | 0.734     | 0.624  | 0.86 NA   | NA       |        |
| A024432_01 | NA | NA        |           | 0.438     | 0.306     | 1.288  | 1.247     | 0.295    | 0.32   |
| A024688_01 |    | 0.83 NA   |           | -0.224    | -0.428 NA |        | 0.397     | 0.63     | 0.272  |
| A024828_01 |    | 0.164 NA  |           | 0.415     | 0.2 NA    |        | -0.195 NA |          | -0.167 |
| A024871_01 |    | 0.367     | 0.256     | 0.275     | 0.149     | 0.106  | -0.102 NA | NA       |        |
| A025304_01 |    | -0.107 NA |           | 0.607     | 0.359 NA  | NA     |           | -0.056   | -0.47  |
| A025505_01 |    | 0.022 NA  |           | 0.269     | -0.223 NA |        | 0.313 NA  |          | 0.127  |
| A025631_01 |    | -0.113    | 0.071     | -0.507    | -0.199 NA |        | 0.178     | 0.143 NA |        |
| A025649_01 | NA | NA        |           | -0.012 NA | NA        |        | 0.427 NA  | NA       |        |
| A025888_01 |    | 0.46      | -0.095 NA | NA        |           | -0.125 | -0.467 NA |          | -0.19  |
| A025917_01 |    | 0.059     | -0.173    | 0.143     | -0.137    | 0.155  | -0.13     | 0.15     | -0.061 |
| A025993_01 | NA |           | 0.229     | -0.209    | -0.195    | 0.499  | 0.627     | 0.232    | 0.403  |
| A000832_01 |    | 0.589     | 0.402 NA  |           | 0.284     | -0.118 | 0.004 NA  | NA       |        |
| A000983_01 |    | -1.214 NA |           | 0.491     | 0.737     | 1.269  | 1.797     | 0.623    | 0.935  |
| A001323_01 |    | 0.108     | 0.078 NA  | NA        |           | 0      | -0.165 NA |          | 0.351  |
| A001615_01 | NA | NA        |           | 0.198     | 0.459 NA  |        | 0.385     | -0.034   | 0.048  |
| A002100_01 |    | -0.704    | -0.53     | 0.624     | 0.73      | 1.406  | 1.871     | 0.592    | 0.712  |
| A002428_01 |    | -1.499    | -1.37     | -0.795    | -0.652    | 0.783  | 1.46      | -0.517   | -0.394 |
| A002959_01 |    | -0.03 NA  |           | 0.372     | 0.361     | 0.632  | 1.108 NA  |          | 0.16   |
| A003384_01 |    | 0.331     | 0.191     | -0.155    | -0.126    | 1.219  | 1.376     | 0.328 NA |        |
| A003432_01 |    | -0.724    | -0.403    | 0.503     | 0.599     | 1.393  | 1.899     | 0.766    | 1.188  |
| A003906_01 | NA |           | 0.412     | -0.891    | -0.709    | 0.569  | 0.888     | 0.389    | 0.754  |
| A004158_01 | NA | NA        |           | -0.022    | 0.143 NA  |        | 0.171 NA  |          | 0.044  |
| A005016_01 |    | 0.505 NA  |           | -0.415    | -0.316 NA |        | 1.256     | 0.152    | 0.404  |
| A006218_01 |    | 0.088     | -0.011    | 0.052     | 0.074     | 1.241  | 1.263 NA  |          | -0.051 |
| A006571_01 |    | 0.311 NA  |           | 0.272     | 0.34 NA   |        | 0.044 NA  | NA       |        |
| A007664_01 |    | -1.066 NA |           | 1.077     | 1.054     | 1.72   | 2.194     | 0.709    | 0.644  |
| A007996_01 |    | -0.039 NA |           | 0.317     | 0.35 NA   |        | 0.514 NA  |          | -0.044 |
| A008395_01 |    | 0.348     | 0.243     | 0.328     | 0.036 NA  |        | -0.478    | 0.3      | 0.135  |
| A009384_01 |    | -1.007    | -1.051    | 1.137     | 1.05      | 1.791  | 2.32      | 0.689    | 0.792  |
| A010777_01 |    | 0.2 NA    |           | 0.166     | 0.142 NA  |        | -0.118 NA |          | 0.143  |
| A011549_01 |    | -0.191    | -0.243    | 0.216     | 0.135     | 1.192  | 1.537     | 0.254    | 0.227  |
| A012282_01 |    | 0.074 NA  |           | 0.042     | 0.219 NA  |        | 0.185     | 0.152    | 0.193  |
| A012617_01 |    | 0.328 NA  | NA        |           | -0.119    | 0.092  | 0.085 NA  |          | 0.131  |
| A014149_01 |    | 0.938     | 1.061     | 0.095     | 0.15      | 1.372  | 1.441     | 0.41     | 0.503  |
| A014237_01 |    | -0.059 NA | NA        | NA        |           | 0.321  | 0.105 NA  |          | 0.105  |
| A014458_01 |    | 0.295 NA  |           | 0.069     | -0.185 NA |        | 0.349 NA  |          | 0.406  |
| A014719_01 |    | -0.851    | -0.857    | -0.875    | -1.019    | 0.243  | 0.775     | 0.124    | 0.219  |
| A014768_01 |    | -0.01     | -0.017    | 0.242     | 0.154     | 0.26   | 0.077     | 0.146    | -0.021 |
| A015277_01 |    | 0.053     | -0.025    | 0.183     | 0.069     | 0.523  | 0.495 NA  | NA       |        |
| A015501_01 |    | -0.243 NA |           | 0.813     | 0.618     | 1.384  | 1.659     | 0.725    | 0.6    |
| A015891_01 |    | 0.025 NA  |           | -0.224    | -0.309    | 0.911  | 1.117     | -0.092   | -0.256 |
| A016892_01 |    | 0.024     | 0.157     | -0.134    | -0.22     | 0.705  | 0.994     | 0.412    | 0.621  |
| A018578_01 |    | 0.546     | 0.317     | -0.069 NA |           | 0.132  | 0.241 NA  | NA       |        |
| A018773_01 |    | 0.099     | -0.132    | -0.176    | -0.005    | -0.24  | -0.17     | -0.176   | -0.254 |
| A019147_01 |    | 0.436 NA  | NA        |           | -0.224 NA |        | 0.089     | 0.258    | -0.006 |
| A019173_01 |    | -0.148    | -0.427    | 0.11      | 0.006     | -0.478 | -0.462    | 0.059    | -0.018 |
| A020365_01 | NA | NA        |           | 0.065     | 0.021 NA  |        | -0.621    | 0.288    | 0.341  |
| A020695_01 |    | 0.21 NA   |           | 0.56      | 0.583 NA  |        | -0.338    | -0.301   | -0.799 |
| A020773_01 |    | 0.253 NA  |           | 0.311     | 0.221     | 0.078  | -0.021    | 0.157    | -0.205 |
| A021007_01 |    | -0.093 NA |           | -0.559    | -0.63     | 0.432  | 0.692     | 0.438    | 0.176  |
| A021284_01 |    | 0.014 NA  |           | 0.139     | -0.041 NA |        | 0.186     | 0.174    | -0.048 |
| A021358_01 |    | 0.191     | -0.054    | 0.115     | -0.305    | 0.204  | 0.173     | -0.034   | 0.084  |
| A021505_01 |    | 0.562     | 0.752     | 0.864     | 0.757     | 0.607  | 0.624     | 0.089    | -0.048 |
| A021801_01 | NA | NA        | NA        |           | -3.05     | 1.076  | 1.534     | -1.141   | -1.356 |

|            |    |           |           |          |  |           |  |           |       |           |           |        |
|------------|----|-----------|-----------|----------|--|-----------|--|-----------|-------|-----------|-----------|--------|
| A021844_01 |    | -0.103 NA |           | 0.235 NA |  | 0.254     |  | 0.107 NA  |       | 0.106     |           |        |
| A021861_01 |    | 0.265 NA  |           | 0.178    |  | -0.014 NA |  | -0.149 NA |       | 0.131     |           |        |
| A021957_01 |    | 0.514     | 0.531     | 0.176    |  | 0.463     |  | 0.192     | 0.268 | -0.071    | -0.208    |        |
| A022288_01 |    | -1.524 NA |           | 1.012    |  | 0.788     |  | 1.606     |       | 2.057     | 0.768     | 0.829  |
| A022312_01 |    | -0.138 NA |           | -0.252   |  | -0.23     |  | 0.368     |       | 0.455     | 0.384     | 0.217  |
| A023427_01 |    | -1.12 NA  |           | -0.291   |  | -0.265    |  | 0.349     |       | 1.055     | -0.165    | -0.027 |
| A023639_01 |    | 0.448 NA  | NA        |          |  | 0.075 NA  |  | 0.243 NA  |       | NA        |           |        |
| A024654_01 |    | 0.221     | -0.074    | 0.296    |  | -0.179    |  | 0.35      |       | 0.146     | 0.344     | 0.191  |
| A025744_01 |    | 0.094 NA  |           | -0.805   |  | -0.722 NA |  | -0.054    |       | 0.561     |           | 0.391  |
| A008108_01 |    | 0.584     | 0.422     | 0.309    |  | 0.363     |  | 0.968     |       | 1.22      | 0.437     | 0.488  |
| A011990_01 |    | 0.326 NA  |           | -0.276   |  | -0.068 NA |  |           |       | 0.423     | 0.164     | -0.009 |
| A018550_01 |    | 0.346     | 0.771     | 0.305 NA |  |           |  | 0.686     |       | 0.625 NA  |           | 0.085  |
| A018865_01 |    | -0.065    | 0.053     | -0.043   |  | 0.043     |  | 0.096     |       | 0.012     | 0.095     | -0.04  |
| A020743_01 |    | 0.216 NA  | NA        | NA       |  | NA        |  |           |       | -0.072 NA |           | 0.195  |
| A023790_01 |    | 0.099 NA  | NA        | NA       |  |           |  | 0.181     |       | 0.09 NA   |           | -0.135 |
| A023812_01 |    | 0.23      | 0.315     | 0.279 NA |  |           |  | 0.116     |       | 0.125 NA  |           | 0.01   |
| A024387_01 |    | 0.006     | 0.046     | 0.106    |  | 0.107     |  | 0.4       |       | 0.48      | 0.368     | 0.582  |
| A024446_01 |    | -0.739    | -0.693    | -1.42    |  | -1.41     |  | 0.263     |       | 0.571     | -0.741    | -0.889 |
| A024462_01 |    | -0.183    | 0.104     | 0.115 NA |  |           |  | -0.029    |       | 0.18 NA   | NA        |        |
| A024556_01 |    | -0.952    | -0.777    | 0.522    |  | 0.143     |  | 1.185     |       | 1.427 NA  |           | 0.659  |
| A025800_01 |    | 0.235 NA  |           | 0.162    |  | -0.088    |  | 0.076     |       | -0.085    | 0.107     | -0.111 |
| A000741_01 | NA |           | 0.024     | 0.063    |  | 0.061     |  | 0.091     |       | 0.047     | -0.001    | 0.175  |
| A020770_01 | NA | NA        | NA        |          |  | -3.583    |  | 0.87      |       | 1.497     | -1.557    | -1.959 |
| A001491_01 | NA |           | -0.153    | -0.526   |  | -0.426    |  | 0.438     |       | 0.814     | 0.268     | 0.218  |
| A000015_01 | NA | NA        |           | -0.902   |  | -0.205    |  | -1.508    |       | -1.244 NA | NA        |        |
| A000400_01 | NA |           | 0.179     | 0.06     |  | 0.12      |  | -0.05     |       | -0.034    | -0.057    | -0.065 |
| A000418_01 | NA |           | -0.015    | -0.201   |  | -0.184    |  | -0.016    |       | 0.154     | -0.133    | 0.211  |
| A000448_01 | NA |           | 0.315     | 0.24     |  | 0.421     |  | -0.578    |       | -0.44     | -0.265    | 0.017  |
| A000745_01 | NA |           | -0.081    | -0.096   |  | 0.029     |  | 0.175     |       | 0.205     | -0.008    | -0.013 |
| A000942_01 | NA |           | 0.195     | -0.327   |  | 0.008     |  | -0.139    |       | 0.002     | 0.141     | 0.226  |
| A001047_01 | NA |           | 0.028     | -0.075   |  | 0.141     |  | -0.112    |       | 0.093 NA  | NA        |        |
| A001349_01 | NA |           | 0.166     | 0.125    |  | 0.236     |  | 0.087     |       | 0.144     | -0.165    | -0.095 |
| A001364_01 | NA |           | -0.144    | 0.438    |  | 0.427     |  | 0.548     |       | 0.625     | 0.172     | 0.11   |
| A001393_01 | NA |           | -0.333    | -0.38    |  | -0.085    |  | 0.156     |       | 0.455     | 0.698     | 0.91   |
| A001427_01 | NA |           | 0.009     | -0.192   |  | 0.123     |  | 0.144     |       | 0.323     | 0.041     | 0.198  |
| A001475_01 | NA |           | -0.026    | -0.132   |  | 0.013     |  | -0.112    |       | -0.239    | 0.128     | 0.026  |
| A001493_01 | NA |           | -0.1      | -0.191   |  | -0.015    |  | -0.213    |       | -0.053    | -0.089    | 0.229  |
| A001569_01 | NA |           | 0.143     | -0.37    |  | -0.128    |  | -0.11     |       | 0.197     | 0.044     | 0.262  |
| A002091_01 | NA |           | -0.004 NA |          |  | 0.128     |  | -0.517    |       | -0.4 NA   | NA        |        |
| A002115_01 | NA |           | 0.098     | 0.19     |  | 0.065     |  | -0.06     |       | -0.252    | -0.114    | -0.197 |
| A002139_01 | NA |           | 0.002     | -0.017   |  | -0.124    |  | -0.103    |       | -0.185    | 0.009     | 0.079  |
| A002163_01 | NA |           | 0.049     | -0.024   |  | 0.162     |  | -0.232    |       | -0.125 NA |           | 0.073  |
| A002347_01 | NA | NA        |           | -0.042   |  | 0.199     |  | 0.269     |       | 0.445 NA  |           | 0.736  |
| A002358_01 | NA | NA        |           | -0.71    |  | -0.019    |  | -0.116    |       | 0.148 NA  |           | 0.435  |
| A002438_01 | NA |           | 0.356     | -0.04    |  | 0.238     |  | 0.35      |       | 0.633     | -0.086    | 0.115  |
| A002620_01 | NA |           | -0.12     | -0.372   |  | -0.139    |  | 0.536     |       | 0.898     | 0.1       | 0.435  |
| A003454_01 | NA |           | -0.076    | -0.124   |  | -0.194    |  | -0.506    |       | -0.327 NA | NA        |        |
| A004153_01 | NA |           | 0.089     | 0.031    |  | 0.221     |  | 0.207     |       | 0.359     | 0.131     | 0.15   |
| A004340_01 | NA |           | -0.017    | -0.271   |  | -0.145    |  | -0.423    |       | -0.47     | -0.135    | -0.134 |
| A004366_01 | NA |           | 0.002     | -0.193   |  | -0.113    |  | 0.222     |       | 0.306     | -0.048    | 0.071  |
| A004544_01 | NA |           | 0.246     | -0.11    |  | -0.118    |  | 0.129     |       | 0.271     | 0.052     | 0.033  |
| A004681_01 | NA |           | -0.293    | -0.05    |  | -0.047    |  | -0.091    |       | -0.214    | -0.058    | -0.173 |
| A004767_01 | NA |           | 0.53      | 0.237    |  | 0.39      |  | -0.116    |       | -0.177 NA | NA        |        |
| A004957_01 | NA |           | 0.059     | -0.176   |  | -0.106    |  | 0.492     |       | 0.684     | 0.519     | 0.418  |
| A004958_01 | NA |           | -0.035    | 0.022    |  | 0.119     |  | -0.204    |       | 0.057     | -0.14     | -0.008 |
| A004969_01 | NA |           | 0.039     | 0.136    |  | 0.024     |  | 0.098     |       | 0.097 NA  | NA        |        |
| A005896_01 | NA |           | 0.031     | -0.075   |  | 0.19      |  | 0.181     |       | 0.36      | 0.083     | 0.393  |
| A005927_01 | NA |           | 0.033     | -0.123   |  | -0.105    |  | -0.106    |       | -0.125    | 0.215     | 0.23   |
| A005993_01 | NA |           | -0.845    | 0.177    |  | 0.309     |  | 0.693     |       | 1.02      | 0.248     | 0.306  |
| A006010_01 | NA |           | 1.469     | 0.031    |  | 0.287     |  | 0.186     |       | 0.339     | 0.333     | 0.879  |
| A006113_01 | NA |           | 0.068     | 0.257    |  | 0.017     |  | 0.013     |       | -0.222    | -0.117    | -0.164 |
| A006404_01 | NA |           | -0.06     | -0.125   |  | -0.073    |  | 0.156     |       | 0.144     | 0.035     | 0.164  |
| A006526_01 | NA |           | -0.258    | -0.932   |  | -0.805    |  | 0.704     |       | 1.126     | 0.306     | 0.6    |
| A006614_01 | NA |           | 0.122     | 0.077    |  | 0.142     |  | -0.068    |       | 0.035     | -0.173    | -0.053 |
| A006812_01 | NA |           | 0.041     | 0.47     |  | 0.443     |  | -0.012    |       | 0.003     | 0.201     | 0.26   |
| A006983_01 | NA |           | 0.117     | -0.056   |  | 0.101     |  | -0.035    |       | 0.112     | -0.056    | -0.097 |
| A007065_01 | NA |           | -0.3      | 0.093    |  | 0.218     |  | -0.27     |       | -0.189    | -0.075 NA |        |
| A007160_01 | NA |           | -0.343    | 0.009    |  | 0.197     |  | -0.278    |       | -0.224    | -0.153    | 0.211  |



|            |    |           |           |          |        |           |        |        |
|------------|----|-----------|-----------|----------|--------|-----------|--------|--------|
| A007253_01 | NA | -0.386    | 0.112     | 0.071    | -0.034 | 0.293     | -0.114 | -0.235 |
| A007301_01 | NA | 0.055     | -0.04     | -0.055   | -0.064 | -0.133    | 0.18   | -0.025 |
| A007345_01 | NA | -0.046    | 0.015     | -0.028   | -0.195 | -0.364    | -0.018 | -0.24  |
| A007579_01 | NA | -0.302    | 0.289     | 0.422    | 0.435  | 0.628     | -0.231 | -0.067 |
| A007731_01 | NA | -0.082    | -0.144    | -0.051   | -0.207 | -0.313    | -0.051 | -0.039 |
| A007737_01 | NA | -0.411    | -0.221    | -0.148   | -0.202 | -0.325 NA |        | 0.076  |
| A008444_01 | NA | 0.085     | -0.081    | 0.12     | -0.119 | -0.12     | -0.126 | -0.185 |
| A008462_01 | NA | 0.01      | 0.243     | 0.112    | 0.005  | -0.004    | 0.011  | 0.054  |
| A009204_01 | NA | -0.489    | 0.631     | 0.473    | -0.574 | -0.644 NA |        | -0.976 |
| A009242_01 | NA | -0.061    | -0.232    | -0.251   | -0.103 | 0.047     | -0.007 | -0.005 |
| A009243_01 | NA | 0.055     | -0.053    | 0.016    | -0.04  | -0.01     | 0.136  | 0.116  |
| A009644_01 | NA | 0.097 NA  |           | 0.188    | 0.03   | 0.152 NA  | NA     |        |
| A009651_01 | NA | -0.33     | -0.186    | -0.251   | -0.313 | -0.177    | -0.282 | 0.097  |
| A009685_01 | NA | -0.417    | 0.158     | 0.177    | 0.292  | 0.198     | -0.164 | -0.221 |
| A009717_01 | NA | -0.116    | 0.353     | 0.337    | 0.687  | 0.901     | 0.136  | 0.114  |
| A009718_01 | NA | -0.157    | 0.098     | 0.041    | -0.957 | -1.146    | -0.342 | -0.351 |
| A009724_01 | NA | -0.317 NA | NA        |          | 0.359  | 0.157     | 0.488  | 0.433  |
| A010662_01 | NA | NA        | -0.462 NA |          | 0.218  | 0.468 NA  | NA     |        |
| A011147_01 | NA | -0.26     | 0.033     | -0.048   | -0.417 | -0.545 NA |        | -0.129 |
| A011464_01 | NA | 0.075     | -0.254    | -0.259   | 0.409  | 0.418     | 0.203  | 0.271  |
| A011466_01 | NA | NA        | -0.315    | -0.33    | -0.09  | -0.068    | 0.19   | 0.227  |
| A011639_01 | NA | 0.191     | -0.032    | 0.126    | -0.225 | -0.156    | -0.031 | -0.03  |
| A011648_01 | NA | 0.192     | -0.111    | 0.076    | 0.075  | 0.116     | -0.108 | -0.088 |
| A011649_01 | NA | -0.076    | -0.606    | -0.065   | -0.136 | 0.177     | 0.032  | 0.028  |
| A011737_01 | NA | 0.433     | 0.458     | 0.332    | 0.439  | 0.366     | -0.22  | -0.229 |
| A011739_01 | NA | -0.132    | -0.136    | 0.102    | -0.371 | -0.207    | -0.233 | -0.102 |
| A011796_01 | NA | -0.172    | -0.312    | -0.253   | -0.12  | 0.026     | -0.045 | -0.137 |
| A011824_01 | NA | NA        | -0.064    | -0.087   | -0.414 | -0.652    | 0.075  | -0.032 |
| A012405_01 | NA | 0.001     | 0.021     | 0.149    | 0.39   | 0.529     | 0.341  | 0.245  |
| A012825_01 | NA | 0.257     | 0.078     | 0.15     | 0.157  | -0.002    | 0.002  | -0.135 |
| A012892_01 | NA | -0.153    | -0.474    | -0.322   | -0.266 | -0.023 NA |        | 0.119  |
| A013060_01 | NA | 0.241     | 0.066     | 0.082    | 0.19   | 0.18      | 0.084  | -0.062 |
| A013531_01 | NA | NA        | 0.271     | 0.038 NA |        | -0.009 NA | NA     |        |
| A013767_01 | NA | -0.205    | -0.208    | -0.414   | -0.05  | -0.13     | -0.43  | -0.526 |
| A013865_01 | NA | -0.04     | 0.145     | -0.078   | 0.178  | 0.281     | 0.164  | 0.073  |
| A013881_01 | NA | -0.189    | -0.449    | -0.684   | -0.854 | -0.717 NA |        | -0.364 |
| A014044_01 | NA | -0.074    | 0.208     | 0.089    | 0.249  | 0.415     | 0.414  | 0.29   |
| A014689_01 | NA | 0.072     | 0.086     | -0.078   | 0.137  | 0.05      | 0.046  | 0.043  |
| A014744_01 | NA | -0.555    | -0.673    | -0.718   | 0.305  | 0.69      | -2.019 | -1.729 |
| A014791_01 | NA | 0.582     | -0.616    | -0.414   | 0.417  | 0.43      | 0.215  | 0.392  |
| A014967_01 | NA | 0.231     | -0.087    | -0.081   | -0.239 | -0.433    | -0.291 | -0.214 |
| A015087_01 | NA | -0.101    | -0.031    | 0.01 NA  |        | -0.158    | 0.334  | -0.159 |
| A015212_01 | NA | 0.298     | 0.023     | -0.077   | -0.122 | -0.09     | -0.064 | 0.094  |
| A015226_01 | NA | -0.679    | 0.623     | -0.643   | 0.994  | 0         | 0.578  | -0.321 |
| A015340_01 | NA | 0.134     | 0.156     | 0.132    | -0.238 | -0.197    | 0.005  | 0.104  |
| A015551_01 | NA | NA        | NA        | NA       | -0.766 | -0.812 NA | NA     |        |
| A015561_01 | NA | 0.111     | 0.185     | -0.051   | -0.44  | -0.629    | -0.07  | 0.121  |
| A015575_01 | NA | 0.184     | -0.438    | -0.355   | -0.905 | -1.101    | 0.539  | 0.49   |
| A016276_01 | NA | -0.202    | -0.192    | -0.156   | -0.157 | -0.136    | 0.078  | 0.065  |
| A016302_01 | NA | -0.284    | -0.191    | -0.304   | -0.224 | -0.274    | -0.131 | -0.244 |
| A016527_01 | NA | NA        | -0.302 NA |          | -0.127 | 0.1 NA    | NA     |        |
| A017523_01 | NA | 0.027     | 0.425     | 0.352    | -0.385 | -0.327    | -0.538 | -0.357 |
| A017547_01 | NA | -0.242    | -0.311    | -0.352   | 1.085  | 1.386     | 0.345  | 0.143  |
| A017927_01 | NA | 0.018     | 0.103     | -0.006   | -0.032 | -0.113    | -0.02  | -0.095 |
| A017943_01 | NA | 0.333     | -0.059    | 0.12     | 0.133  | 0.191     | 0.057  | 0.035  |
| A018485_01 | NA | -0.099    | 0.133     | -0.013   | -0.184 | -0.313    | -0.298 | -0.263 |
| A018705_01 | NA | 0.049     | 0.116     | -0.007   | 0.06   | 0.123     | -0.046 | -0.122 |
| A018761_01 | NA | -0.127    | -0.131    | -0.118   | -0.368 | -0.427    | -0.163 | -0.228 |
| A018765_01 | NA | -0.215    | -0.001    | 0.07     | -0.915 | -0.843    | -0.377 | -0.416 |
| A018790_01 | NA | -0.197    | -0.015    | 0.094    | -0.388 | -0.338    | -0.104 | -0.263 |
| A018794_01 | NA | -0.144    | -0.021    | -0.074   | -0.136 | -0.209    | 0.101  | -0.246 |
| A018861_01 | NA | -0.035    | 0.117     | -0.016   | 0.274  | 0.43      | -0.134 | -0.176 |
| A018876_01 | NA | 0.251     | 0.148     | 0.083    | -0.677 | -0.639    | -0.725 | -0.276 |
| A019001_01 | NA | -0.362    | -0.028    | -0.259   | -1.049 | -1.414    | -0.306 | -0.448 |
| A019031_01 | NA | -0.439    | -0.842    | -0.543   | 0.218  | 0.683     | -0.117 | -0.09  |
| A019042_01 | NA | -0.127    | -0.358    | -0.336   | 0.137  | 0.242     | 0.22   | 0.16   |
| A019054_01 | NA | -0.096    | -0.28     | -0.196   | -0.09  | -0.023    | 0.333  | 0.039  |
| A019079_01 | NA | -0.261    | -0.073    | -0.128   | 0.884  | 1.052     | 0.669  | 0.55   |

|            |    |    |        |        |        |        |        |        |        |
|------------|----|----|--------|--------|--------|--------|--------|--------|--------|
| A019084_01 | NA | NA | -0.069 | -0.523 | 0.092  | -0.131 | NA     | -0.273 |        |
| A019125_01 | NA | NA |        | 0.131  | 0.008  | -0.066 | 0.06   | NA     | -0.38  |
| A019185_01 | NA |    | -0.068 | -0.112 | -0.114 | 0.02   | 0.119  | 0.118  | 0.016  |
| A019226_01 | NA |    | 0.064  | 0.084  | -0.161 | -0.132 | -0.35  | NA     | -0.135 |
| A019232_01 | NA | NA |        | 0.164  | -0.177 | -0.3   | -0.581 | 0.266  | 0.162  |
| A019280_01 | NA |    | 0.179  | 0.033  | NA     | 0.002  | 0.301  | 0.135  | NA     |
| A019462_01 | NA |    | -0.053 | 0.178  | 0.067  | 0.131  | 0.03   | NA     | NA     |
| A019792_01 | NA |    | 0.213  | 0.127  | 0.119  | 0.375  | 0.577  | -0.335 | -0.106 |
| A019986_01 | NA |    | -0.101 | 0.126  | -0.039 | 0.365  | 0.465  | -0.121 | -0.02  |
| A019992_01 | NA |    | -0.144 | -0.235 | -0.228 | -0.015 | 0.014  | 0.309  | 0.462  |
| A019996_01 | NA |    | 0.079  | -0.099 | -0.115 | -0.1   | -0.228 | 0.228  | 0.139  |
| A020426_01 | NA |    | -0.105 | -0.17  | -0.127 | 0.052  | 0.625  | -0.126 | 0.067  |
| A020775_01 | NA |    | -0.054 | 0.264  | 0.134  | 0.08   | 0.065  | 0.009  | -0.127 |
| A020779_01 | NA |    | 0.523  | 0.615  | 0.603  | 0.801  | 1.036  | -0.062 | -0.204 |
| A021737_01 | NA |    | -0.069 | NA     |        | -0.516 | -0.975 | NA     | -0.022 |
| A022056_01 | NA |    | 0.049  | 0.163  | -0.177 | 0.186  | 0.129  | -0.037 | -0.148 |
| A022274_01 | NA | NA |        | 0.255  | 0.253  | NA     | -0.9   | NA     | -0.475 |
| A023555_01 | NA |    | -0.03  | 0.079  | -0.215 | -0.06  | -0.535 | 0.449  | 0.149  |
| A024044_01 | NA |    | -0.14  | -0.113 | -0.341 | -0.028 | -0.098 | 0.305  | 0.207  |
| A024170_01 | NA |    | 0.22   | 0.015  | 0.215  | -0.142 | -0.186 | 0.007  | -0.107 |
| A024467_01 | NA |    | -0.225 | 0.095  | 0.063  | 0.598  | 0.899  | 0.116  | 0.448  |
| A024543_01 | NA |    | 0.18   | -0.063 | 0.323  | 0.312  | 0.491  | 0.358  | 0.121  |
| A024776_01 | NA |    | -0.103 | 0.002  | -0.161 | 0.183  | 0.363  | -0.032 | -0.19  |
| A025167_01 | NA |    | 0.318  | 0.038  | -0.153 | 0.187  | -0.066 | 0.325  | 0.259  |
| A025902_01 | NA |    | 0.255  | 0.448  | 0.32   | -0.175 | -0.227 | -0.227 | -0.301 |
| A026000_01 | NA |    | 0.065  | -0.198 | -0.194 | 0.174  | 0.138  | 0.464  | 0.186  |
| A026032_01 | NA |    | 0.324  | -0.054 | 0.186  | 0.139  | 0.195  | -0.046 | 0.012  |
| A000572_01 | NA | NA |        | -0.165 | 0.161  | NA     | 0.099  | NA     | 0.333  |
| A004818_01 | NA | NA |        | 0.076  | 0.38   | NA     | 0.074  | -0.174 | 0.007  |
| A005988_01 | NA | NA |        | -0.361 | -0.201 | NA     | 0.391  | -0.067 | 0.168  |
| A006161_01 | NA |    | 0.244  | 0.363  | 0.405  | 0.311  | 0.269  | -0.041 | -0.216 |
| A007292_01 | NA | NA |        | 0.231  | 0.37   | 0.496  | 0.332  | -0.074 | -0.155 |
| A007713_01 | NA |    | -0.02  | -0.045 | -0.162 | -0.57  | -0.697 | -0.041 | 0.016  |
| A009463_01 | NA |    | 0.03   | -0.247 | -0.023 | 0.299  | 0.468  | 0.212  | 0.46   |
| A011646_01 | NA | NA |        | 0.101  | 0.204  | 0.01   | -0.021 | 0.174  | 0.003  |
| A012457_01 | NA |    | -0.069 | 0.215  | 0.098  | 0.373  | 0.19   | NA     | 0.086  |
| A012674_01 | NA |    | -0.109 | -0.744 | -0.829 | 0.4    | 0.472  | 0.055  | 0.137  |
| A016524_01 | NA | NA |        | 0.193  | -0.014 | NA     | -0.42  | 0.053  | NA     |
| A017134_01 | NA |    | 0.219  | 0.322  | 0.075  | 0.137  | 0.072  | 0.048  | -0.088 |
| A018784_01 | NA | NA |        | 0.882  | 0.759  | 0.047  | 0.121  | -0.118 | -0.226 |
| A019101_01 | NA | NA |        | 0.091  | 0.044  | NA     | 0.094  | -0.066 | -0.088 |
| A020277_01 | NA | NA |        | 0.016  | 0.147  | NA     | -0.31  | 0.1    | 0.059  |
| A024469_01 | NA | NA |        | 0.494  | 0.382  | -0.669 | -0.563 | -0.39  | -0.367 |
| A024824_01 | NA | NA |        | 0.034  | 0.012  | 0.229  | 0.216  | -0.125 | -0.45  |
| A005098_01 | NA | NA |        | -0.854 | NA     |        | 0.511  | NA     | 0.532  |

| Oligo ID   | 10-11 DPA A | 10-11 DPA A dye swap | 10-11 DPA B | 10-11 DPA B dye swap | 12-14 DPA A | 12-14 DPA A dye swap | 12-14 DPA B | 12-14 DPA B dye swap |
|------------|-------------|----------------------|-------------|----------------------|-------------|----------------------|-------------|----------------------|
| A000001_01 | -1.166      | -0.945               | 0.341       | 0.299                | 0.514       | 0.434                | 0.51        | 0.507                |
| A000002_01 | -1.04       | NA                   | 0.101       | 0.334                | -0.089      | 0.388                | 0.188       | 0.423                |
| A000003_01 | 0.519       | 0.455                | -0.297      | 0.242                | -0.159      | -0.065               | NA          | 0.2                  |
| A000004_01 | -0.612      | -0.084               | 0.031       | 0.013                | 0.032       | 0.262                | 0.329       | 0.371                |
| A000006_01 | NA          | NA                   | 0.105       | 0.236                | NA          | NA                   | -0.476      | -0.369               |
| A000012_01 | 0.234       | 0.24                 | -0.124      | 0.106                | 0.057       | 0.14                 | 0.269       | 0.327                |
| A000013_01 | NA          | NA                   | 0.456       | 0.709                | 0.038       | NA                   | 0.181       | NA                   |
| A000016_01 | -0.202      | -0.167               | -0.078      | 0.176                | -0.472      | -0.337               | -0.508      | -0.373               |
| A000017_01 | -1.127      | -0.156               | 0.259       | 0.294                | -0.134      | 0.089                | 0.043       | 0.077                |
| A000020_01 | 0.278       | 0.249                | -0.24       | 0.021                | -0.009      | 0.137                | 0.014       | 0.158                |
| A000021_01 | -0.341      | -0.077               | 0.224       | 0.285                | -0.374      | -0.052               | -0.002      | 0                    |
| A000022_01 | 0.543       | 0.644                | 0.008       | 0.227                | 0.689       | 0.624                | 0.521       | 0.659                |
| A000025_01 | -0.594      | -0.083               | 0.11        | 0.128                | -0.029      | -0.092               | 0.034       | -0.08                |
| A000026_01 | NA          | NA                   | 0.085       | 0.224                | NA          | NA                   | -0.529      | -0.362               |
| A000027_01 | 0.103       | NA                   | -0.13       | 0.129                | -0.152      | 0.264                | NA          | NA                   |
| A000029_01 | NA          | -0.038               | -0.783      | NA                   | -0.437      | NA                   | NA          | NA                   |
| A000031_01 | -0.676      | -0.506               | -1.34       | -0.897               | -1.379      | -1.303               | -1.531      | -1.576               |
| A000038_01 | 0.391       | 0.451                | -0.214      | 0.06                 | -0.084      | 0.143                | -0.309      | -0.008               |
| A000040_01 | 0.03        | 0.013                | -0.519      | -0.16                | -0.336      | -0.051               | -0.291      | -0.101               |
| A000041_01 | -0.249      | -0.089               | 0.6         | 0.43                 | 0.17        | 0.205                | 0.144       | -0.045               |
| A000042_01 | NA          | NA                   | -0.104      | 0.188                | NA          | NA                   | -0.262      | NA                   |
| A000046_01 | NA          | NA                   | -0.158      | 0.256                | -0.482      | NA                   | -0.236      | -0.008               |
| A000047_01 | 0.576       | 0.637                | -0.217      | NA                   | 0.495       | 0.742                | 0.638       | 1.072                |
| A000051_01 | 0.616       | 0.556                | -0.451      | NA                   | 0.003       | 0.441                | NA          | NA                   |
| A000052_01 | NA          | NA                   | 0.142       | 0.616                | -0.101      | NA                   | NA          | 0.602                |
| A000055_01 | NA          | NA                   | -0.071      | 0.253                | NA          | NA                   | -0.704      | -0.399               |
| A000056_01 | 0.493       | 0.317                | -0.199      | 0.117                | 0.14        | 0.211                | -0.001      | 0.012                |
| A000058_01 | NA          | NA                   | -0.246      | -0.066               | NA          | NA                   | NA          | -0.321               |
| A000061_01 | -0.696      | -0.07                | 0.926       | 0.9                  | 0.009       | 0.27                 | 0.158       | 0.122                |
| A000063_01 | 0.275       | 0.793                | 0.238       | 0.232                | 0.279       | 0.581                | 0.198       | 0.353                |
| A000064_01 | 0.043       | -0.079               | -0.702      | NA                   | -1.127      | -0.718               | NA          | NA                   |
| A000065_01 | 0.846       | 0.656                | -0.028      | 0.153                | 0.617       | 0.576                | 0.387       | 0.665                |
| A000067_01 | 0.905       | 1.097                | -0.311      | NA                   | 0.622       | 0.968                | 0.571       | 0.889                |
| A000069_01 | 0.716       | 0.644                | NA          | NA                   | -0.042      | 0.287                | NA          | 0.627                |
| A000073_01 | NA          | -0.867               | -0.25       | 0.034                | -0.377      | -0.132               | -0.225      | 0.063                |
| A000074_01 | NA          | 0.483                | 0.059       | 0.272                | NA          | 0.54                 | -0.073      | 0.072                |
| A000077_01 | 0.289       | 0.027                | -0.685      | NA                   | -0.287      | NA                   | NA          | NA                   |
| A000080_01 | 0.026       | 0.048                | -0.694      | NA                   | -0.474      | -0.326               | -0.393      | NA                   |
| A000084_01 | 0.539       | 0.22                 | -0.508      | NA                   | -0.156      | 0.02                 | -0.075      | NA                   |
| A000088_01 | -0.026      | 0.007                | -0.353      | -0.113               | -0.071      | 0.084                | 0.036       | 0.122                |
| A000091_01 | 0.133       | 0.171                | -0.161      | -0.069               | 0.302       | 0.157                | 0.233       | 0.142                |
| A000095_01 | 0.797       | 0.866                | 0.299       | 0.512                | -0.212      | NA                   | NA          | NA                   |
| A000098_01 | 0.419       | 0.276                | 0.53        | 0.59                 | 0.509       | 0.877                | 0.024       | 0.261                |
| A000107_01 | 0.944       | 0.82                 | -0.428      | 0.097                | -0.289      | -0.263               | 0.023       | 0.225                |
| A000111_01 | 0.349       | 0.438                | 0.052       | 0.152                | 0.102       | 0.427                | 0.088       | 0.22                 |
| A000113_01 | 0.088       | 0.213                | -0.62       | -0.328               | -0.376      | -0.194               | -0.246      | 0.132                |
| A000115_01 | 0.254       | -0.014               | 0.07        | -0.058               | -0.437      | -0.212               | -0.253      | -0.483               |
| A000120_01 | -0.367      | -0.117               | NA          | NA                   | -0.909      | NA                   | NA          | NA                   |
| A000123_01 | NA          | NA                   | -0.93       | NA                   | NA          | NA                   | NA          | NA                   |
| A000124_01 | 0.441       | 0.741                | -0.253      | -0.133               | -0.026      | 0.427                | 0.307       | 0.505                |
| A000134_01 | 0.88        | 0.571                | -1.327      | -0.881               | 0.516       | 0.442                | -0.114      | -0.042               |
| A000138_01 | -0.367      | -0.147               | -0.169      | -0.151               | -0.347      | -0.187               | -0.196      | -0.221               |
| A000146_01 | -1.231      | -1.119               | -1.036      | NA                   | -1.207      | -0.914               | NA          | NA                   |
| A000150_01 | 0.488       | 0.373                | -0.119      | 0.114                | 0.13        | 0.083                | -0.094      | 0.074                |
| A000157_01 | -0.263      | -0.053               | -0.86       | -0.37                | -0.613      | -0.044               | -1.027      | -0.871               |
| A000169_01 | 0.235       | 0.447                | -0.519      | -0.101               | 0.036       | 0.512                | 0.183       | 0.538                |
| A000173_01 | 0.33        | 0.427                | -0.001      | 0.353                | 0.048       | 0.273                | -0.005      | 0.148                |
| A000179_01 | 0.094       | 0.358                | -0.328      | 0.216                | -0.246      | 0.196                | -0.138      | 0.107                |

|            |    |        |        |        |        |        |        |        |        |
|------------|----|--------|--------|--------|--------|--------|--------|--------|--------|
| A000185_01 |    | -0.194 | 0.59   | -0.271 | NA     | 0.032  | 0.601  | 0.253  | 0.554  |
| A000187_01 |    | 0.611  | 1.22   | -0.251 | 0.375  | -0.305 | 0.961  | -0.067 | 0.893  |
| A000198_01 | NA |        | NA     | -0.192 | 0.265  | 0.064  | 0.487  | 0.592  | 0.744  |
| A000202_01 | NA |        | NA     | 0.371  | 0.229  | -0.342 | NA     | -0.128 | -0.201 |
| A000220_01 |    | 0.27   | 0.45   | -0.269 | -0.138 | 0.965  | 1.323  | 0.586  | 1.082  |
| A000223_01 |    | -0.679 | -0.508 | 0.505  | 0.538  | -0.445 | -0.011 | -0.287 | -0.307 |
| A000226_01 |    | 1.191  | 0.89   | -0.222 | -0.001 | 0.879  | 0.88   | 0.317  | 0.446  |
| A000233_01 | NA |        | NA     | -0.794 | NA     | NA     | NA     | NA     | NA     |
| A000239_01 | NA |        | NA     | -0.033 | 0.189  | -0.197 | 0.478  | 0.031  | 0.26   |
| A000248_01 |    | 0.169  | 0.548  | 0.264  | 0.329  | 0.879  | 0.736  | 0.915  | 0.862  |
| A000253_01 |    | -1.312 | -0.567 | -0.606 | -0.432 | -0.792 | -0.49  | -0.614 | -0.713 |
| A000259_01 |    | 0.181  | -0.158 | -0.8   | -0.618 | -0.383 | -0.378 | -0.128 | 0.056  |
| A000260_01 |    | 0.231  | 0.398  | 0.632  | 0.492  | 0.104  | 0.234  | -0.028 | -0.151 |
| A000261_01 |    | 0.206  | 0.289  | -0.392 | -0.134 | -0.129 | 0.226  | 0      | 0.154  |
| A000263_01 | NA |        | 0.672  | -0.318 | 0.153  | NA     | 0.02   | NA     | NA     |
| A000268_01 |    | 0.143  | 0.149  | -0.303 | -0.206 | 0.228  | 0.245  | 0.036  | 0.149  |
| A000269_01 |    | -0.211 | 0.096  | 0.032  | 0.237  | -0.162 | 0.183  | -0.073 | 0.101  |
| A000270_01 |    | -0.044 | NA     | 0.071  | 0.334  | -0.206 | NA     |        | 0.353  |
| A000297_01 | NA |        | NA     | 0.171  | 0.436  | 0.478  | 0.796  | 0.183  | 0.232  |
| A000301_01 |    | 1.075  | 1.172  | 0.328  | 0.506  | 0.633  | 0.926  | 0.36   | 0.642  |
| A000302_01 |    | 0.519  | 0.398  | -0.143 | NA     | -0.064 | NA     | NA     |        |
| A000303_01 |    | -0.944 | NA     | 0.152  | 0.274  | -0.292 | 0.066  | -0.07  | -0.028 |
| A000305_01 |    | 0.009  | 0.168  | 0.275  | 0.308  | 0.007  | 0.173  | 0.073  | 0.126  |
| A000319_01 |    | -1.815 | -1.523 | -1.156 | -0.762 | -0.623 | -0.368 | -0.648 | -0.631 |
| A000321_01 | NA |        | NA     | -0.921 | NA     | -0.533 | NA     | NA     | NA     |
| A000322_01 |    | -0.113 | -0.114 | -0.582 | -0.264 | -0.437 | -0.267 | -0.064 | 0.063  |
| A000324_01 | NA |        | NA     | -0.913 | NA     | NA     | NA     | NA     | NA     |
| A000325_01 | NA |        | 0.593  | 0.537  | 0.674  | NA     | 0.433  | 0.106  | 0.582  |
| A000326_01 |    | -0.163 | -0.09  | -0.052 | 0.462  | -0.328 | -0.052 | -0.107 | 0.024  |
| A000329_01 |    | -0.334 | -0.131 | -0.546 | -0.063 | 0.861  | 0.652  | 0.808  | 0.896  |
| A000336_01 |    | 0.198  | 0.378  | 0.149  | 0.265  | -0.071 | 0.024  | -0.126 | -0.172 |
| A000337_01 |    | -0.48  | -0.221 | -0.124 | 0.208  | -0.533 | 0.059  | -0.304 | -0.03  |
| A000340_01 |    | 0.392  | 0.544  | -0.484 | 0.115  | -0.268 | 0.267  | -0.151 | 0.425  |
| A000348_01 |    | -0.5   | -0.72  | -0.936 | -0.349 | -0.633 | -0.423 | 0.071  | 0.613  |
| A000351_01 |    | -0.258 | -0.107 | -0.267 | -0.026 | 0.132  | 0.163  | -0.206 | 0.021  |
| A000352_01 |    | -0.649 | -0.726 | NA     | NA     | -1.259 | -1.015 | NA     | NA     |
| A000353_01 |    | -1.304 | -0.983 | 0.507  | 0.423  | 0.017  | 0.193  | 0.276  | 0.386  |
| A000355_01 | NA |        | NA     | -0.204 | NA     | -0.487 | NA     | NA     | NA     |
| A000358_01 |    | 0.073  | -0.205 | -0.769 | -0.444 | -0.68  | -0.509 | -0.532 | -0.182 |
| A000364_01 |    | -0.536 | NA     | 0.292  | 0.355  | -0.291 | NA     | -0.156 | -0.059 |
| A000365_01 |    | 0.344  | NA     | -0.033 | 0.404  | -0.065 | NA     | NA     | NA     |
| A000368_01 |    | 0.203  | 0.168  | -0.121 | NA     | 0.179  | 0.225  | NA     | 0.315  |
| A000371_01 |    | -0.043 | -0.045 | -0.101 | -0.033 | -0.472 | -0.289 | -0.121 | -0.226 |
| A000373_01 |    | 0.234  | 0.135  | -0.164 | 0.207  | -0.053 | 0.21   | -0.254 | NA     |
| A000377_01 |    | 0.011  | 0.258  | -0.031 | 0.004  | 0.509  | 0.461  | 0.701  | 0.646  |
| A000382_01 | NA |        | NA     | 0.395  | 0.673  | -0.386 | NA     | 0.521  | 0.796  |
| A000384_01 | NA |        | NA     | 0.1    | NA     | NA     | NA     | NA     | NA     |
| A000389_01 |    | 1.552  | 1.159  | 0.231  | 0.509  | -0.091 | 0.035  | NA     | NA     |
| A000396_01 |    | 0.306  | 0.44   | -0.146 | 0.179  | -0.202 | 0.356  | 0.133  | 0.436  |
| A000402_01 | NA |        | 0.46   | -0.668 | NA     | 0.899  | 1.138  | NA     | NA     |
| A000406_01 |    | -0.31  | -0.369 | -0.665 | -0.331 | -1.619 | -1.177 | -0.659 | -0.418 |
| A000410_01 |    | 0.475  | 0.386  | 0.223  | 0.426  | 0.284  | 0.665  | 0.114  | 0.399  |
| A000412_01 |    | -0.113 | 0.329  | -0.035 | 0.355  | 0.115  | 0.455  | NA     | NA     |
| A000419_01 |    | 0.563  | 0.566  | 0.092  | 0.241  | 0.06   | 0.264  | 0.371  | 0.458  |
| A000420_01 |    | 0.259  | 0.538  | 0.195  | 0.219  | 0.201  | 0.645  | 0.28   | NA     |
| A000423_01 | NA |        | 0.569  | -0.108 | NA     | 0.368  | 0.986  | NA     | 0.681  |
| A000426_01 |    | -0.117 | 0.339  | 0.077  | 0.265  | NA     | 0.446  | 0.043  | 0.174  |
| A000454_01 |    | 0.144  | 0.378  | 0.307  | 0.376  | 0.521  | 0.487  | 0.024  | 0.151  |
| A000455_01 | NA |        | NA     | -0.22  | 0.06   | NA     | 0.513  | NA     | NA     |
| A000462_01 | NA |        | NA     | 0.4    | 0.447  | NA     | NA     | -0.466 | -0.496 |
| A000471_01 | NA |        | NA     | -0.194 | 0.076  | NA     | NA     | -0.295 | -0.039 |
| A000473_01 |    | -0.882 | -0.707 | -0.56  | -0.368 | -0.727 | -0.75  | -0.715 | -0.563 |
| A000478_01 | NA |        | NA     | -0.315 | 0.029  | NA     | NA     | -0.442 | -0.379 |
| A000479_01 | NA |        | 0.224  | 0.004  | 0.285  | 0.149  | NA     | 0.033  | 0.204  |
| A000489_01 |    | 0.571  | 0.6    | -0.068 | 0.035  | 0.551  | 0.478  | 0.757  | 0.635  |
| A000500_01 |    | 0.669  | 0.875  | -0.096 | 0.365  | NA     | 0.683  | 0.141  | 0.583  |
| A000511_01 |    | -0.088 | NA     | -0.645 | -0.292 | -0.849 | NA     | -0.532 | -0.253 |
| A000517_01 |    | -0.224 | 0.205  | -0.029 | 0.107  | 0.251  | 0.415  | 0.231  | 0.303  |

|            |    |        |        |        |        |        |        |        |        |
|------------|----|--------|--------|--------|--------|--------|--------|--------|--------|
| A000519_01 |    | -1.223 | -0.685 | 0.377  | 0.299  | -0.208 | 0.096  | -0.198 | -0.269 |
| A000523_01 |    | 0.597  | 0.468  | -0.736 | -0.258 | 0.22   | 0.423  | 0.439  | 0.761  |
| A000525_01 |    | -0.083 | 0.367  | 0.205  | 0.522  | 0.525  | 0.712  | 0.871  | 0.815  |
| A000526_01 |    | 0.399  | 0.606  | -0.008 | 0.328  | 0.31   | 0.67   | 0      | 0.462  |
| A000533_01 |    | 0.23   | 0.067  | -0.442 | -0.352 | -0.088 | -0.058 | -0.003 | 0.042  |
| A000534_01 |    | 0.016  | 0.178  | 0.118  | 0.212  | -0.511 | -0.61  | -0.423 | -0.273 |
| A000543_01 |    | -0.378 | -0.115 | 0.316  | 0.355  | -0.588 | -0.473 | -0.633 | -0.576 |
| A000548_01 |    | -0.469 | -0.189 | -1.091 | -0.643 | -1.022 | -0.655 | -1.129 | -1.2   |
| A000553_01 |    | -0.418 | NA     | -0.362 | -0.169 | -0.844 | -0.47  | -0.28  | -0.164 |
| A000555_01 | NA |        | NA     | -0.814 | -0.143 | NA     | 0.263  | -0.469 | -0.364 |
| A000559_01 |    | -0.22  | 0.202  | -0.203 | 0.069  | -0.231 | 0.041  | 0.127  | 0.326  |
| A000567_01 |    | 0.155  | 0.255  | 0.384  | 0.126  | 0.611  | 0.483  | 0.627  | 0.4    |
| A000568_01 |    | -0.076 | -0.268 | -0.382 | -0.205 | 0.405  | 0.453  | 0.057  | 0.317  |
| A000577_01 |    | 0.354  | 0.479  | 0.383  | 0.458  | -0.164 | -0.09  | -0.332 | -0.227 |
| A000579_01 |    | 1.164  | 1.169  | -0.416 | -0.178 | -0.504 | -0.366 | -0.829 | -0.637 |
| A000582_01 |    | 0.532  | 0.602  | 0.463  | 0.551  | 0.225  | 0.294  | 0.04   | 0.217  |
| A000589_01 |    | -0.125 | 0.016  | -0.216 | 0.015  | -0.386 | -0.005 | -0.318 | -0.241 |
| A000590_01 |    | 0.263  | 0.357  | -0.388 | -0.027 | -0.515 | NA     | -0.41  | -0.131 |
| A000592_01 |    | 0.337  | 0.646  | 0.107  | 0.134  | 0.942  | 0.776  | 0.758  | 0.728  |
| A000600_01 |    | 0.265  | 0.151  | -0.82  | -0.573 | -0.752 | -0.495 | -0.079 | 0.125  |
| A000608_01 |    | 0.08   | 0.299  | 0.102  | 0.382  | 0.496  | 0.434  | 0.023  | 0.247  |
| A000610_01 | NA |        | NA     | 0.063  | 0.056  | NA     | NA     | -0.021 | -0.089 |
| A000612_01 |    | 0.191  | 0.257  | 0.224  | 0.317  | 0.343  | 0.557  | 0.138  | 0.359  |
| A000613_01 | NA |        | 0.816  | -0.235 | 0.25   | 0.518  | 0.723  | 0.215  | 0.543  |
| A000618_01 | NA |        | NA     | -0.152 | -0.037 | NA     | NA     | -0.357 | -0.353 |
| A000619_01 |    | 0.965  | 1.24   | 0.572  | 0.667  | 0.624  | 0.974  | 1.137  | 1.303  |
| A000622_01 |    | 0.45   | 0.455  | -0.019 | 0.202  | 0.108  | 0.13   | 0.12   | 0.105  |
| A000629_01 |    | 0.16   | 0.24   | -0.634 | -0.328 | 0.309  | 0.109  | 0.382  | 0.402  |
| A000633_01 |    | -0.297 | -0.057 | -0.092 | 0.096  | 0.166  | 0.061  | 0.031  | 0.019  |
| A000637_01 | NA |        | NA     | -0.258 | NA     | -0.316 | NA     | 0.017  | 0.26   |
| A000638_01 | NA |        | NA     | -0.493 | -0.231 | NA     | NA     | -0.091 | -0.052 |
| A000639_01 |    | -0.272 | -0.003 | 0.614  | 0.639  | 0.098  | 0.151  | -0.039 | -0.007 |
| A000643_01 |    | -0.027 | 0.356  | 0.068  | 0.232  | 0.095  | 0.257  | 0.26   | 0.106  |
| A000645_01 |    | -0.651 | -0.539 | -0.508 | -0.339 | -0.629 | -0.272 | -0.085 | 0.073  |
| A000649_01 |    | 0.036  | 0.436  | 0.006  | 0.107  | -0.006 | 0.37   | 0.271  | 0.259  |
| A000650_01 |    | 0.356  | 0.451  | -0.178 | -0.019 | 0.307  | 0.442  | 0.088  | 0.31   |
| A000652_01 |    | 0.013  | 0.193  | 0.154  | 0.158  | -0.203 | -0.02  | -0.34  | -0.433 |
| A000653_01 |    | 0.677  | 0.63   | 0.02   | 0.228  | 0.207  | 0.619  | 0.256  | 0.435  |
| A000657_01 |    | 0.182  | 0.316  | -0.375 | -0.13  | -0.341 | -0.174 | -0.489 | -0.188 |
| A000665_01 |    | -0.054 | 0.194  | -0.008 | 0.067  | 0.035  | 0.386  | 0.091  | 0.282  |
| A000668_01 |    | 0.141  | 0.036  | 0.093  | 0.328  | 0.301  | 0.725  | 0.805  | 0.896  |
| A000677_01 | NA |        | NA     | -0.4   | NA     | -0.217 | NA     | -0.076 | NA     |
| A000684_01 |    | 0.089  | 0.607  | 0.31   | 0.869  | 0.269  | 0.868  | NA     | NA     |
| A000685_01 | NA |        | NA     | -0.002 | 0.194  | NA     | 0.433  | 0.048  | 0.214  |
| A000687_01 | NA |        | NA     | -0.796 | NA     |        | 0.027  | NA     | 0.579  |
| A000692_01 |    | -0.6   | -0.167 | 0.158  | 0.243  | 0.095  | 0.274  | 0.166  | 0.153  |
| A000696_01 |    | 1.179  | 1.008  | 0.236  | 0.449  | 0.791  | 0.903  | 0.499  | 0.818  |
| A000697_01 |    | -0.483 | NA     | NA     | NA     | -0.682 | -0.372 | NA     | NA     |
| A000700_01 |    | -0.453 | 0.088  | 0.473  | 0.519  | 0.414  | 0.408  | 0.164  | 0.279  |
| A000701_01 |    | -0.577 | 0.12   | 0.38   | 0.342  | -0.047 | 0.173  | 0.18   | 0.004  |
| A000710_01 |    | 0.437  | 0.459  | -0.755 | -0.325 | -0.017 | 0.166  | 0.218  | 0.686  |
| A000711_01 |    | -0.178 | 0.226  | 0.025  | 0.19   | -0.127 | NA     | -0.209 | -0.112 |
| A000722_01 |    | 0.02   | 0.16   | 0.281  | 0.408  | 0.313  | 0.555  | 0.32   | 0.444  |
| A000727_01 |    | 0.239  | 0.283  | -0.158 | 0.067  | 0.14   | 0.212  | -0.117 | 0.042  |
| A000731_01 | NA |        | NA     | 0.388  | 0.481  | NA     | 0.858  | 0.3    | 0.387  |
| A000742_01 |    | -1.088 | -0.594 | -0.164 | -0.058 | -0.867 | NA     | -0.548 | -0.493 |
| A000755_01 |    | -0.024 | 0.383  | 0.168  | 0.237  | 0.431  | 0.512  | 0.748  | 0.85   |
| A000757_01 | NA |        | NA     | 0.036  | 0.325  | -0.042 | 0.525  | 0.17   | 0.907  |
| A000759_01 | NA |        | NA     | 0      | 0.222  | -0.364 | NA     | -0.019 | 0.052  |
| A000764_01 | NA |        | 0.238  | -0.927 | -0.205 | NA     | NA     | -0.788 | -0.324 |
| A000770_01 |    | -0.751 | -0.647 | -0.029 | 0.033  | -0.548 | -0.142 | -0.397 | -0.128 |
| A000775_01 |    | 0.561  | 0.27   | -0.005 | 0.121  | -0.027 | 0.043  | 0.128  | 0.214  |
| A000781_01 |    | 0.94   | 0.562  | -0.153 | 0.303  | 0.253  | 0.369  | 0.29   | 0.443  |
| A000782_01 |    | -0.011 | -0.001 | NA     | NA     | -0.183 | -0.018 | NA     | NA     |
| A000794_01 |    | 0.431  | 0.237  | -0.516 | NA     | -0.479 | NA     | NA     | NA     |
| A000795_01 |    | -0.476 | 0.016  | -0.445 | -0.259 | -0.048 | 0.301  | -0.109 | 0.095  |
| A000801_01 |    | -0.957 | -0.61  | 0.208  | 0.266  | -0.014 | 0.086  | 0.024  | 0.062  |
| A000802_01 |    | 0.537  | 0.422  | -0.364 | 0.167  | -0.271 | -0.142 | -0.218 | 0.352  |

|            |    |        |        |        |        |        |        |        |        |
|------------|----|--------|--------|--------|--------|--------|--------|--------|--------|
| A000803_01 |    | -0.063 | 0.18   | 0.054  | 0.177  | 0.086  | 0.361  | 0.041  | 0.199  |
| A000807_01 | NA | NA     |        | -0.583 | NA     | -0.232 | NA     | NA     |        |
| A000808_01 |    | 0.623  | 0.523  | 0.068  | 0.312  | -0.209 | NA     | -0.038 | 0.138  |
| A000814_01 |    | -0.758 | -0.403 | 0.288  | 0.39   | -0.448 | -0.108 | -0.291 | -0.015 |
| A000827_01 |    | 0.202  | 0.182  | 0.606  | 0.551  | 0.871  | 0.67   | 0.51   | 0.626  |
| A000828_01 |    | -0.369 | 0.224  | 0.673  | 0.645  | 0.432  | 0.561  | 0.221  | 0.406  |
| A000835_01 |    | 0.077  | -0.006 | -0.345 | 0.087  | -0.253 | 0.006  | -0.427 | -0.178 |
| A000842_01 |    | -0.655 | NA     | 0.31   | 0.543  | -0.247 | NA     | NA     | 0.282  |
| A000851_01 |    | -0.835 | NA     | -0.499 | -0.125 | NA     |        | -0.782 | -0.461 |
| A000853_01 |    | -0.076 | 0.142  | 0.352  | NA     | 0.155  | 0.092  | 0.179  | -0.062 |
| A000856_01 |    | 0.295  | 0.266  | 0.402  | 0.416  | 0.529  | 0.37   | 0.211  | 0.375  |
| A000875_01 |    | -0.007 | NA     | -0.254 | 0.206  | 0.223  | 0.364  | 0.155  | 0.362  |
| A000880_01 |    | 0.781  | 1.015  | 0.205  | NA     | 0.413  | 0.777  | NA     | 0.97   |
| A000888_01 |    | 0.258  | 0.009  | -0.011 | 0.102  | NA     | -0.906 | -0.674 | -0.455 |
| A000897_01 | NA | NA     |        | -0.713 | NA     | NA     |        | -0.422 | NA     |
| A000903_01 | NA | NA     |        | -0.12  | 0.313  | 0.144  | 0.984  | 0.324  | 0.799  |
| A000910_01 | NA |        | 0.451  | -0.144 | NA     | NA     | NA     |        | 0.246  |
| A000919_01 | NA | NA     |        | -0.148 | 0.092  | -0.119 | NA     | -0.306 | -0.048 |
| A000922_01 |    | 0.506  | 0.225  | -0.526 | 0.06   | -0.447 | -0.389 | -0.547 | -0.131 |
| A000936_01 |    | 0.512  | 0.36   | -0.049 | 0.171  | 0.532  | 0.532  | 0.317  | 0.439  |
| A000937_01 |    | -0.013 | 0.269  | 0.102  | 0.225  | 0.364  | 0.49   | 0.128  | 0.226  |
| A000941_01 | NA | NA     |        | 0.4    | 0.201  | -0.017 | 0.352  | 0.246  | 0.033  |
| A000945_01 | NA | NA     |        | 0.111  | 0.33   | NA     |        | -0.794 | NA     |
| A000953_01 |    | 0.092  | 0.008  | -0.184 | -0.092 | 0.111  | 0.138  | -0.237 | 0.007  |
| A000960_01 | NA | NA     |        | -0.108 | 0.017  | -0.075 | NA     | NA     |        |
| A000962_01 |    | -0.265 | -0.116 | -0.202 | -0.159 | -0.294 | -0.235 | -0.052 | -0.032 |
| A000970_01 |    | -0.118 | -0.147 | -0.496 | -0.269 | -0.385 | -0.437 | -0.387 | -0.292 |
| A000974_01 |    | 0.053  | 0.596  | -0.139 | 0.154  | 0.003  | NA     | -0.283 | -0.09  |
| A000984_01 |    | 0.42   | 0.323  | -0.367 | -0.165 | 0.007  | 0.109  | -0.155 | 0.105  |
| A000987_01 |    | -0.234 | -0.123 | -0.224 | 0.462  | 0.107  | 0.204  | NA     | NA     |
| A000988_01 |    | -0.456 | -0.148 | -0.194 | -0.059 | -0.51  | -0.374 | -0.587 | -0.459 |
| A000992_01 |    | -0.801 | -0.466 | -0.691 | -0.342 | -0.775 | -0.373 | -0.376 | -0.212 |
| A000997_01 |    | -0.509 | -0.201 | 0.373  | 0.296  | 0.116  | 0.214  | 0.078  | 0.156  |
| A001006_01 |    | -0.165 | NA     | -0.499 | NA     | -0.309 | NA     | NA     | NA     |
| A001007_01 |    | -0.068 | 0.296  | -0.373 | NA     | 0.244  | 0.351  | NA     | 0.453  |
| A001011_01 |    | 0.961  | 0.691  | -0.381 | 0.195  | 0.059  | 0.437  | 0.168  | 0.74   |
| A001012_01 |    | 0.197  | 0.043  | -1.073 | -0.66  | -0.603 | -0.523 | -0.292 | -0.394 |
| A001017_01 | NA | NA     |        | 0.506  | 0.481  | -0.314 | 0.134  | -0.026 | -0.092 |
| A001019_01 |    | -0.004 | 0.019  | -0.236 | 0.041  | -0.379 | -0.446 | -0.421 | -0.383 |
| A001023_01 |    | 0.771  | 0.682  | 0.104  | 0.304  | 0.715  | 0.823  | 0.344  | 0.605  |
| A001029_01 | NA | NA     |        | 0.253  | 0.419  | NA     | NA     | -0.354 | -0.33  |
| A001031_01 |    | 0.41   | 0.399  | -0.346 | 0.064  | 0.133  | 0.192  | 0.203  | 0.401  |
| A001032_01 |    | 0.286  | 0.324  | -0.126 | -0.046 | -0.257 | -0.179 | -0.349 | -0.276 |
| A001034_01 |    | -0.766 | NA     | 0.126  | 0.098  | -0.031 | 0.044  | 0.186  | 0.125  |
| A001035_01 |    | -0.187 | 0.195  | 0.046  | 0.175  | 0.195  | 0.326  | 0.228  | 0.249  |
| A001036_01 |    | -0.454 | -0.031 | 0.681  | 0.7    | 0.167  | 0.128  | 0.189  | 0.239  |
| A001041_01 |    | -0.412 | 0.105  | 0.115  | 0.217  | -0.645 | -0.058 | 0.13   | 0.107  |
| A001042_01 | NA | NA     |        | -0.512 | NA     | NA     | NA     | -0.677 | NA     |
| A001043_01 |    | -0.504 | NA     | -0.046 | 0.281  | -0.256 | 0.013  | -0.004 | 0.084  |
| A001044_01 |    | -0.71  | -0.57  | NA     | NA     | -1.186 | NA     | NA     | NA     |
| A001045_01 |    | 0.107  | 0.221  | 0.106  | 0.303  | 0.057  | 0.143  | 0.124  | 0.193  |
| A001048_01 |    | -0.519 | -0.245 | 0.238  | 0.348  | 0.021  | 0.067  | 0.124  | 0.189  |
| A001052_01 |    | -0.562 | -0.532 | -0.719 | -0.619 | -0.614 | -0.505 | -0.463 | -0.662 |
| A001053_01 |    | 0.486  | 0.383  | 0.281  | 0.414  | 0.448  | 0.527  | 0.295  | 0.269  |
| A001056_01 |    | 0.368  | 0.28   | -0.142 | 0.043  | -0.174 | 0.097  | 0.265  | 0.524  |
| A001059_01 |    | -0.882 | NA     | -0.409 | -0.145 | -0.477 | NA     | -0.281 | -0.018 |
| A001071_01 | NA | NA     |        | -0.137 | 0.227  | 0.252  | 0.562  | NA     | 0.426  |
| A001077_01 | NA | NA     |        | 0.137  | 0.204  | NA     | NA     | -0.458 | -0.261 |
| A001082_01 |    | -0.512 | NA     | 0.365  | 0.377  | 0.283  | 0.244  | -0.202 | 0.026  |
| A001086_01 |    | 0.167  | 0.356  | 0.435  | 0.305  | 0.844  | 0.57   | 0.437  | 0.407  |
| A001087_01 | NA | NA     |        | 0.395  | 0.555  | 0.671  | 0.966  | 0.284  | 0.447  |
| A001088_01 |    | -0.087 | NA     | -0.337 | -0.101 | -0.141 | 0.074  | -0.143 | 0.023  |
| A001089_01 | NA | NA     |        | 0.099  | 0.4    | NA     | NA     | -0.05  | 0.225  |
| A001090_01 |    | -0.437 | -0.259 | -0.083 | 0.232  | -0.499 | -0.31  | -0.35  | -0.111 |
| A001091_01 |    | 0.282  | 0.378  | 0.157  | 0.084  | -0.155 | -0.003 | 0.173  | 0.089  |
| A001092_01 |    | -0.871 | -0.397 | 0.548  | 0.621  | NA     | 0.082  | -0.138 | 0.069  |
| A001093_01 |    | -0.973 | -0.359 | -0.283 | 0.034  |        | 0.598  | 0.697  | 0.961  |
| A001095_01 |    | -0.957 | -0.088 | 0.134  | 0.247  | -0.197 | 0.027  | 0.504  | 0.403  |

|            |        |        |        |        |        |        |        |        |        |
|------------|--------|--------|--------|--------|--------|--------|--------|--------|--------|
| A001098_01 | -0.393 | -0.448 | -1.509 | -0.73  | -1.037 | -1.088 | NA     |        | -0.724 |
| A001099_01 | 1.513  | 1.111  | -1.35  | NA     | -0.624 | -0.892 | NA     | NA     |        |
| A001100_01 | 0.123  | 0.27   | -0.413 | -0.148 | -0.194 | -0.011 | 0.153  | 0.236  |        |
| A001102_01 | -0.361 | -0.289 | -0.833 | -0.503 | -0.515 | -0.488 | -0.85  | -0.603 |        |
| A001103_01 | 0.511  | 0.574  | -1.599 | -0.96  | 0.768  | 0.722  | 0.923  | 0.947  |        |
| A001105_01 | NA     | NA     | -0.242 | -0.092 | 0.181  | 0.368  | 0.023  | 0.061  |        |
| A001106_01 | -0.241 | NA     | -0.127 | -0.189 | -0.174 | NA     | -0.067 | -0.17  |        |
| A001107_01 | -1.012 | -0.321 | -0.174 | -0.076 | -0.617 | -0.156 | -0.096 | 0.136  |        |
| A001113_01 | 0.555  | 0.429  | 0.074  | 0.069  | 0.359  | 0.381  | 0.168  | 0.239  |        |
| A001115_01 | 0.996  | 1.042  | 0.073  | 0.109  | 0.149  | 0.235  | 0.284  | 0.243  |        |
| A001121_01 | -0.323 | -0.213 | 0.047  | 0.283  | 0.154  | 0.233  | -0.124 | 0.036  |        |
| A001122_01 | 0.043  | 0.246  | 0.043  | 0.391  | 0.064  | NA     | NA     | 0.184  |        |
| A001126_01 | -0.61  | NA     | 0.277  | 0.415  | -0.191 | 0.044  | -0.111 | -0.196 |        |
| A001127_01 | -0.133 | -0.081 | -0.266 | -0.171 | -0.027 | 0.181  | 0.379  | 0.496  |        |
| A001128_01 | 0.726  | 0.324  | -0.357 | -0.081 | -0.69  | -0.454 | -0.468 | -0.443 |        |
| A001129_01 | 0.626  | 0.403  | -0.799 | -0.457 | 0.932  | 0.391  | 0.494  | 0.405  |        |
| A001131_01 | 0.631  | 0.426  | -0.148 | 0.077  | 0.115  | 0.289  | 0.067  | 0.417  |        |
| A001134_01 | 0.269  | 0.245  | -0.471 | NA     | 0.119  | 0.204  | 0.236  | 0.503  |        |
| A001135_01 | -1.931 | -1.866 | -1.46  | -0.943 | -1.961 | -1.449 | -1.617 | -1.396 |        |
| A001136_01 | -0.135 | 0.092  | 0.233  | 0.399  | 0.22   | 0.579  | 0.391  | 0.594  |        |
| A001137_01 | NA     | NA     | -0.578 | NA     | NA     | NA     | -0.239 | NA     |        |
| A001138_01 | -0.418 | -0.17  | -0.377 | -0.184 | -0.214 | -0.034 | -0.107 | -0.035 |        |
| A001140_01 | 0.141  | 0.287  | 0.044  | 0.28   | -0.237 | -0.116 | 0.141  | 0.181  |        |
| A001141_01 | NA     | NA     | -0.148 | 0.081  | -1.121 | NA     | -0.422 | -0.249 |        |
| A001142_01 | NA     | -0.025 | 0.594  | 0.529  | 0.557  | 0.694  | 0.248  | 0.208  |        |
| A001144_01 | -3.102 | -3.822 | -5.188 | -3.198 | -3.355 | -2.273 | -3.034 | -3.236 |        |
| A001146_01 | -0.717 | -0.536 | -0.44  | -0.154 | -0.858 | -0.645 | -0.326 | -0.221 |        |
| A001147_01 | 0.367  | 0.45   | 0.374  | 0.31   | 0.387  | 0.282  | 0.081  | -0.01  |        |
| A001153_01 | -0.359 | 0.317  | -0.134 | 0.034  | -0.281 | 0.111  | -0.161 | -0.055 |        |
| A001154_01 | 0.215  | 0.305  | 0.533  | 0.579  | 0.426  | 0.41   | 0.187  | 0.213  |        |
| A001155_01 | -0.749 | -0.512 | -1.812 | -1.286 | 0.082  | 0.375  | 0.065  | 0.069  |        |
| A001159_01 | 0.56   | 0.798  | 0.075  | 0.423  | -0.157 | 0.195  | -0.506 | -0.3   |        |
| A001163_01 | -1.313 | -0.555 | -0.066 | 0.335  | -0.783 | -0.339 | -0.426 | -0.026 |        |
| A001165_01 | -0.296 | -0.418 | -1.433 | -0.781 | -1.005 | -0.88  | -1.121 | -0.878 |        |
| A001166_01 | -1.014 | -0.559 | -0.94  | -0.108 | NA     | -0.531 | -0.245 | NA     |        |
| A001169_01 | -0.419 | -0.36  | 0.35   | 0.434  | -0.064 | NA     | NA     | -0.176 |        |
| A001180_01 | -0.495 | 0.189  | 0.237  | 0.343  | 0.344  | 0.429  | 0.19   | 0.414  |        |
| A001181_01 | 0.528  | 0.579  | -0.207 | NA     | 0.128  | 0.124  | NA     | 0.396  |        |
| A001184_01 | -0.348 | -0.231 | 0.306  | 0.34   | -0.183 | -0.051 | -0.329 | -0.237 |        |
| A001186_01 | -0.808 | -0.325 | -0.305 | -0.062 | -1.17  | -0.745 | -0.645 | -0.462 |        |
| A001187_01 | NA     | NA     | -0.072 | 0.347  | -0.523 | NA     | -0.406 | -0.191 |        |
| A001188_01 | -0.152 | 0.464  | 0.085  | 0.118  | 0.527  | 0.425  | 0.761  | 0.776  |        |
| A001189_01 | -1.411 | -0.693 | -0.33  | -0.144 | 0.138  | 0.266  | 0.124  | 0.315  |        |
| A001190_01 | -0.086 | 0.051  | -0.19  | 0.131  | -0.227 | -0.601 | -0.33  | 0.014  |        |
| A001197_01 | NA     | NA     | 0.024  | 0.109  | NA     | 0.485  | 0.422  | 0.549  |        |
| A001199_01 | 0.843  | 0.658  | -0.084 | 0.153  | 0.438  | 0.467  | 0.263  | 0.355  |        |
| A001207_01 | -0.533 | -0.171 | 0.242  | 0.456  | -0.379 | -0.138 | -0.477 | -0.456 |        |
| A001209_01 | NA     | -0.501 | -0.174 | -0.049 | -0.143 | 0.207  | 0.002  | 0.06   |        |
| A001210_01 | NA     | -0.363 | -0.115 | 0.105  | -0.407 | NA     | -0.364 | -0.106 |        |
| A001211_01 | -0.206 | 0.026  | 0.048  | 0.087  | 0.146  | 0.271  | 0.16   | 0.244  |        |
| A001212_01 | -1.24  | -0.497 | 0.106  | 0.348  | -0.757 | -0.194 | -0.16  | -0.056 |        |
| A001215_01 | -1.264 | -0.711 | -0.04  | 0.121  | 0.418  | 0.61   | 0.247  | 0.253  |        |
| A001216_01 | 0.978  | 0.695  | 0.116  | 0.251  | 1.17   | 1.157  | 1.044  | 1.059  |        |
| A001217_01 | -0.461 | 0.107  | -0.549 | -0.253 | -0.361 | 0.266  | -0.007 | 0.4    |        |
| A001218_01 | NA     | 0.521  | 0.062  | 0.298  | -0.112 | 0.228  | 0.049  | 0.409  |        |
| A001219_01 | 0.624  | 0.683  | 0.044  | 0.428  | NA     | 0.637  | NA     | 0.607  |        |
| A001222_01 | 0.744  | 0.734  | -0.547 | -0.241 | NA     | 0.204  | -0.262 | -0.139 |        |
| A001223_01 | NA     | -0.878 | 0.14   | 0.192  | -0.753 | NA     | -0.481 | -0.304 |        |
| A001227_01 | -0.27  | 0.176  | -0.042 | 0.207  | 0.351  | 0.68   | 0.171  | 0.316  |        |
| A001229_01 | -0.879 | NA     | -0.099 | -0.103 | -0.426 | NA     | -0.171 | -0.499 |        |
| A001230_01 | NA     | NA     | -0.152 | 0.168  | -0.018 | NA     | -0.242 | NA     |        |
| A001231_01 | -0.493 | -0.395 | -0.553 | -0.049 | -0.786 | -0.378 | -0.192 | -0.086 |        |
| A001232_01 | NA     | NA     | -0.346 | NA     | NA     | NA     | -0.198 | NA     |        |
| A001234_01 | 0.409  | 0.322  | 0.28   | 0.385  | 0.38   | 0.563  | -0.008 | 0.25   |        |
| A001235_01 | -1.262 | -0.981 | -0.443 | -0.139 | -1.155 | -0.967 | -0.511 | -0.585 |        |
| A001237_01 | 0.51   | 0.486  | 0.072  | 0.212  | 0.233  | 0.277  | 0.262  | 0.35   |        |
| A001240_01 | 0.386  | 0.285  | -0.122 | 0.32   | -0.077 | 0.291  | NA     | 0.51   |        |
| A001241_01 | NA     | NA     | -0.976 | NA     | NA     | NA     | -1.091 | NA     |        |

|            |    |        |        |        |        |        |        |        |        |
|------------|----|--------|--------|--------|--------|--------|--------|--------|--------|
| A001242_01 |    | -4.167 | -3.974 | -5.952 | -4.107 | -4.53  | -2.803 | -3.482 | -3.905 |
| A001244_01 | NA |        | -0.147 | -0.177 | 0.05   | NA     | 0.054  | 0.003  | 0.132  |
| A001245_01 | NA | NA     |        | 0.477  | 0.539  | NA     |        | -0.189 | -0.167 |
| A001246_01 | NA |        | -0.655 | -0.039 | 0.21   | 0.123  | 0.116  | -0.039 | -0.027 |
| A001247_01 |    | -1.338 | -0.592 | -0.381 | -0.25  | -0.437 | -0.029 | 0.1    | 0.205  |
| A001248_01 |    | -0.006 | 0.339  | 0.068  | -0.104 | -0.064 | -0.237 | -0.274 | -0.333 |
| A001250_01 |    | 0.098  | -0.085 | -0.059 | 0.274  | -0.681 | -0.35  | -0.511 | 0.083  |
| A001251_01 |    | 0.603  | 0.49   | -0.149 | 0.03   | 0.152  | 0.312  | 0.004  | 0.256  |
| A001254_01 |    | -0.097 | -0.143 | -0.016 | 0.114  | -0.139 | 0.045  | -0.028 | 0.2    |
| A001255_01 |    | 0.516  | 0.498  | 0.045  | 0.359  | 0.051  | 0.269  | 0.13   | 0.163  |
| A001257_01 |    | 0.569  | 0.666  | -0.25  | NA     | 0.386  | 0.585  | 0.522  | 0.551  |
| A001260_01 | NA |        | NA     | -0.19  | 0.076  | NA     |        | -0.473 | -0.213 |
| A001261_01 |    | -1.009 | -0.289 | -0.381 | -0.309 | 1.43   | 1.089  | 1.327  | 1.236  |
| A001263_01 |    | 1.054  | 0.84   | 0.115  | NA     | 0.71   | 0.782  | NA     | 0.779  |
| A001273_01 |    | 0.573  | 0.489  | 0.228  | 0.366  | 0.599  | 0.523  | 0.396  | 0.499  |
| A001281_01 |    | -0.421 | -0.209 | 0.251  | 0.21   | -0.312 | -0.202 | -0.082 | -0.05  |
| A001283_01 |    | 0.258  | 0.078  | -0.379 | -0.34  | 0.107  | 0.137  | 0.069  | 0.046  |
| A001284_01 |    | -0.474 | 0.598  | NA     | 0.036  | -0.485 | 0.646  | 0.316  | 0.543  |
| A001285_01 |    | 0.052  | 0.384  | 0.005  | 0.107  | 0.759  | 0.745  | 0.443  | 0.587  |
| A001289_01 |    | -0.246 | -0.193 | -0.326 | 0.038  | -0.886 | -0.596 | -0.422 | 0.03   |
| A001291_01 | NA |        | NA     | -0.404 | -0.151 | NA     |        | -0.485 | -0.445 |
| A001293_01 |    | 0.577  | 0.264  | -0.408 | -0.178 | 0.101  | -0.173 | -0.163 | -0.277 |
| A001296_01 |    | 0.257  | 0.298  | 0.042  | 0.252  | -0.196 | 0.045  | -0.071 | 0.211  |
| A001297_01 |    | 0.278  | 0.147  | 0.011  | -0.015 | -0.271 | -0.214 | -0.159 | -0.188 |
| A001298_01 | NA |        | 0.446  | -0.109 | 0.08   | NA     |        | -0.214 | -0.196 |
| A001299_01 |    | 0.429  | 0.526  | -0.211 | -0.204 | 0.594  | 0.846  | 1.238  | 1.631  |
| A001302_01 |    | 0.091  | -0.239 | -1.135 | -0.84  | -0.721 | -0.78  | -1.042 | -0.97  |
| A001303_01 |    | -0.272 | 0.11   | 0.175  | 0.255  | 0.754  | 0.745  | 0.502  | 0.58   |
| A001306_01 |    | 0.566  | 0.494  | 0.117  | 0.337  | 0.581  | 0.591  | 0.381  | 0.475  |
| A001308_01 |    | 0.628  | 0.429  | 0.129  | 0.237  | 0.05   | 0.284  | 0.151  | 0.271  |
| A001309_01 |    | 0.457  | 0.312  | -0.219 | -0.026 | 0.534  | 0.421  | 0.602  | 0.482  |
| A001311_01 |    | -0.812 | -0.611 | 0.088  | 0.022  | -0.718 | -0.457 | -0.29  | -0.447 |
| A001317_01 |    | 0.617  | 0.317  | -0.123 | 0.221  | 0.235  | NA     | NA     | 0.232  |
| A001318_01 |    | -0.066 | 0.488  | -1.338 | -0.981 | -1.096 | -0.524 | -0.428 | -0.56  |
| A001324_01 |    | -0.663 | -0.207 | 0.211  | 0.357  | 0.024  | 0.237  | 0.297  | 0.284  |
| A001325_01 |    | 0.573  | 0.338  | -0.321 | 0.068  | 0.166  | 0.131  | 0.084  | 0.314  |
| A001326_01 |    | -0.39  | -0.159 | -0.237 | -0.026 | -0.398 | -0.353 | -0.263 | -0.164 |
| A001329_01 |    | -0.571 | -0.17  | 0.04   | -0.016 | -1.028 | -0.128 | -0.095 | -0.13  |
| A001331_01 | NA |        | NA     | 0.353  | 0.468  | NA     | NA     | -0.315 | -0.211 |
| A001332_01 |    | -0.132 | -0.105 | 0.371  | 0.366  | -0.374 | -0.299 | -0.191 | -0.312 |
| A001333_01 |    | 0.693  | 0.684  | 0.014  | 0.103  | 0.373  | 0.266  | 0.287  | 0.296  |
| A001334_01 |    | -0.304 | -0.162 | 0.151  | 0.117  | -0.209 | -0.06  | 0.06   | -0.004 |
| A001339_01 |    | 0.185  | 0.309  | 0.76   | 0.587  | 0.888  | 0.693  | 0.385  | 0.253  |
| A001340_01 |    | -1.683 | -1.309 | -0.481 | -0.24  | -1.38  | -0.966 | -0.781 | -0.642 |
| A001345_01 |    | -0.542 | -0.19  | 0.086  | 0.069  | 0.092  | -0.02  | -0.162 | -0.218 |
| A001347_01 |    | -0.017 | -0.014 | -0.5   | NA     | 0.066  | NA     | NA     | NA     |
| A001348_01 |    | -0.151 | -0.315 | -0.136 | -0.166 | -0.332 | -0.223 | -0.29  | -0.393 |
| A001350_01 |    | 0.143  | 0.139  | -0.61  | -0.466 | 0.17   | 0.229  | 0.116  | 0.186  |
| A001351_01 |    | 0.243  | 0.164  | -0.444 | -0.13  | -0.069 | 0.012  | -0.532 | -0.319 |
| A001352_01 |    | 0.69   | 0.818  | -0.185 | NA     | -0.664 | NA     | NA     | NA     |
| A001353_01 |    | 0.745  | 0.341  | -0.057 | 0.261  | 0.113  | NA     | 0.147  | 0.125  |
| A001355_01 |    | -2.092 | -2.837 | -2.588 | -2.24  | -2.305 | -2.096 | -1.92  | -2.24  |
| A001356_01 |    | 0.084  | 0.004  | 0.487  | 0.337  | 0.04   | 0.112  | 0.133  | 0.108  |
| A001357_01 |    | -0.193 | -0.267 | -0.39  | -0.224 | 0.285  | 0.302  | 0.238  | 0.159  |
| A001358_01 | NA |        | NA     | -0.37  | -0.37  | NA     |        | -0.448 | -0.792 |
| A001360_01 |    | 0.296  | 0.051  | -0.004 | 0.244  | -0.942 | -0.767 | -0.442 | -0.2   |
| A001363_01 |    | -0.278 | -0.163 | 0.25   | 0.303  | -0.379 | -0.131 | -0.05  | 0.072  |
| A001369_01 | NA |        | -0.817 | -0.824 | -0.536 | NA     | -1.08  | -1.151 | -0.959 |
| A001374_01 |    | -2.758 | -3.466 | NA     | -2.839 | -2.571 | -2.226 | -2.296 | -2.705 |
| A001375_01 |    | -0.424 | -0.268 | 0.355  | 0.313  | 0.517  | 0.557  | 0.675  | 0.564  |
| A001376_01 | NA |        | -1.14  | 0.096  | 0.067  | -0.576 | -0.324 | -0.079 | -0.09  |
| A001378_01 |    | -0.017 | 0.22   | -0.061 | 0.083  | 0.297  | 0.327  | 0.162  | 0.16   |
| A001380_01 |    | -0.804 | -0.936 | -1.062 | -0.62  | -1.142 | -1.157 | -0.897 | -0.741 |
| A001387_01 | NA |        | NA     | -1.499 | -0.973 | NA     |        | -1.28  | -1.276 |
| A001389_01 |    | 0.133  | 0.375  | -0.219 | -0.163 | 0.326  | 0.513  | 0.319  | 0.194  |
| A001390_01 |    | 0.394  | 0.39   | 0.152  | 0.397  | 0.454  | 0.362  | 0.003  | 0.251  |
| A001392_01 |    | 0.492  | 0.704  | 0.161  | 0.358  | 0.408  | 0.934  | 0.24   | 0.606  |
| A001396_01 | NA |        | NA     | -0.547 | -0.429 | NA     |        | -0.333 | -0.431 |



|            |    |        |        |        |        |        |        |        |        |
|------------|----|--------|--------|--------|--------|--------|--------|--------|--------|
| A001399_01 |    | -0.106 | -0.129 | -0.234 | -0.217 | -0.033 | -0.058 | 0.37   | 0.199  |
| A001400_01 |    | -0.049 | 0.012  | 0.129  | 0.009  | 0.108  | 0.136  | -0.031 | -0.15  |
| A001401_01 | NA |        | -0.315 | 0.279  | 0.195  | -0.237 | NA     | -0.203 | -0.299 |
| A001409_01 |    | 0.214  | 0.173  | -0.072 | 0.091  | -0.833 | -0.761 | -0.488 | -0.2   |
| A001410_01 | NA | NA     |        | -0.066 | 0.31   | NA     | 0.533  | 0.025  | 0.412  |
| A001411_01 |    | -0.294 | -0.214 | -0.713 | -0.476 | -0.215 | -0.21  | 0.22   | 0.115  |
| A001412_01 |    | 0.032  | 0.156  | 0.064  | 0.14   | -0.037 | -0.046 | 0.102  | 0.101  |
| A001417_01 | NA | NA     |        | -0.12  | NA     | -0.197 | NA     | 0.299  | NA     |
| A001418_01 |    | -0.59  | NA     | 0.033  | 0.056  | -0.4   | NA     | -0.494 | -0.543 |
| A001420_01 |    | -0.125 | -0.33  | -0.802 | NA     | -0.97  | -0.761 | -0.208 | 0.116  |
| A001421_01 |    | -1.482 | -0.531 | -0.027 | 0.142  | -0.82  | -0.28  | 0.15   | 0.244  |
| A001426_01 |    | -1.168 | -0.548 | 0.279  | 0.299  | -0.046 | 0.141  | 0.187  | 0.179  |
| A001428_01 |    | -0.133 | 0.303  | -0.139 | 0.079  | 0.162  | 0.068  | 0.159  | 0.385  |
| A001429_01 | NA | NA     |        | -2.072 | -1.489 | NA     |        | -0.988 | -1.343 |
| A001432_01 | NA | NA     |        | -0.259 | 0.022  | NA     | NA     | -0.464 | -0.412 |
| A001435_01 |    | -0.494 | -0.035 | 0.6    | 0.227  | 0.973  | 0.531  | 0.666  | 0.451  |
| A001436_01 | NA |        | -0.3   | -0.828 | -0.523 | -0.422 | NA     | -0.139 | -0.176 |
| A001441_01 |    | 0.452  | 0.583  | -0.004 | 0.081  | 0.226  | 0.4    | 0.336  | 0.394  |
| A001442_01 |    | -0.825 | -0.968 | -0.105 | -0.123 | -0.726 | -0.615 | -0.483 | -0.732 |
| A001445_01 |    | -0.034 | 0.128  | -0.386 | -0.19  | -0.876 | -0.448 | -0.16  | -0.051 |
| A001446_01 |    | 0.008  | -0.059 | -0.3   | -0.233 | -0.107 | -0.11  | 0.003  | -0.18  |
| A001448_01 |    | -0.381 | -0.069 | -0.65  | -0.479 | -0.305 | -0.393 | -0.433 | -0.315 |
| A001449_01 | NA | NA     |        | 0.212  | 0.516  | NA     | NA     | NA     | NA     |
| A001451_01 |    | 0.235  | 0.305  | -0.283 | 0.018  | 0.445  | 0.639  | -0.084 | 0.193  |
| A001452_01 |    | -0.608 | NA     | -0.279 | -0.177 | -0.901 | -0.289 | -0.411 | -0.303 |
| A001455_01 |    | -1.051 | -1.118 | -0.51  | -0.383 | -1.439 | -0.935 | -0.69  | -0.536 |
| A001457_01 |    | -0.306 | 0.051  | -0.146 | 0.11   | -0.278 | -0.241 | -0.154 | 0.077  |
| A001458_01 |    | -0.494 | -0.232 | 0.147  | 0.309  | 0.063  | 0.109  | -0.033 | -0.012 |
| A001460_01 | NA |        | -0.71  | -0.505 | -0.129 | -0.769 | NA     | -0.374 | -0.062 |
| A001461_01 | NA | NA     |        | 0.433  | 0.348  | -0.541 | NA     | -0.456 | -0.454 |
| A001465_01 |    | -0.38  | -0.281 | 0.122  | 0.067  | -0.053 | 0.079  | 0.044  | -0.109 |
| A001468_01 |    | -1.676 | -0.941 | 0.042  | 0.002  | -0.278 | -0.018 | 0.051  | -0.003 |
| A001471_01 | NA | NA     |        | -1.776 | -1.215 | NA     | NA     | NA     | NA     |
| A001472_01 |    | 0.154  | 0.163  | 0.305  | 0.369  | 0.959  | 0.839  | 0.553  | 0.51   |
| A001474_01 |    | 0.346  | 0.433  | -0.06  | 0.026  | 0.391  | 0.352  | 0.26   | 0.114  |
| A001477_01 |    | 0.826  | 0.743  | 0.097  | 0.42   | 0.059  | 0.113  | -0.26  | 0.013  |
| A001480_01 |    | 0.481  | NA     | -0.45  | NA     | -0.113 | NA     | NA     | NA     |
| A001481_01 |    | 0.361  | 0.455  | 0.42   | 0.34   | 0.228  | 0.302  | 0.164  | 0.213  |
| A001487_01 |    | -0.74  | -0.227 | -0.068 | 0.009  | 0.052  | 0.222  | 0.087  | 0.208  |
| A001488_01 |    | -0.932 | -0.55  | 0.587  | 0.44   | -0.286 | -0.115 | -0.094 | -0.134 |
| A001490_01 | NA |        | -0.625 | -0.013 | 0.046  | -0.17  | NA     | 0.157  | 0.039  |
| A001495_01 |    | -0.296 | -0.072 | 0.227  | 0.248  | 0.153  | 0.354  | 0.061  | 0.125  |
| A001496_01 |    | 0.021  | 0.142  | -0.628 | NA     | -0.881 | NA     | NA     | NA     |
| A001507_01 |    | 0.33   | 0.289  | -0.058 | 0.083  | -0.292 | -0.153 | -0.285 | -0.181 |
| A001511_01 |    | 0.808  | 0.573  | -0.051 | 0.195  | 0.24   | 0.332  | 0.453  | 0.643  |
| A001513_01 |    | -1.378 | -0.863 | -0.369 | -0.27  | -0.734 | -0.254 | 0.059  | 0.286  |
| A001516_01 |    | 0.376  | 0.572  | 0.04   | 0.366  | 0.182  | 0.579  | -0.067 | 0.181  |
| A001518_01 | NA | NA     |        | -1.49  | -0.977 | NA     | NA     | NA     | NA     |
| A001529_01 | NA | NA     |        | 0.091  | 0.402  | NA     | NA     | -0.292 | 0.006  |
| A001536_01 |    | -0.85  | NA     | -0.371 | -0.258 | -0.496 | NA     | 0.254  | 0.237  |
| A001537_01 | NA | NA     |        | 0.356  | 0.283  | NA     | NA     | -0.217 | -0.299 |
| A001553_01 | NA | NA     |        | 0.187  | 0.203  | -0.564 | NA     | -0.326 | -0.363 |
| A001558_01 |    | -0.646 | -0.759 | -0.156 | -0.199 | -0.525 | -0.438 | -0.178 | -0.54  |
| A001559_01 | NA | NA     |        | -0.457 | -0.218 | -0.468 | NA     | -0.221 | -0.213 |
| A001566_01 |    | -0.613 | -0.648 | -0.787 | -0.369 | -1.13  | -0.776 | -0.282 | -0.236 |
| A001567_01 |    | -0.817 | -0.571 | 0.83   | 0.636  | -0.108 | 0.02   | 0.138  | -0.015 |
| A001568_01 | NA | NA     |        | -0.103 | NA     | 0.219  | 0.595  | NA     | NA     |
| A001573_01 |    | 0.578  | 0.471  | -0.282 | 0.171  | 0.16   | 0.241  | NA     | 0.37   |
| A001578_01 |    | -0.413 | -0.463 | -1.037 | -0.787 | -0.583 | -0.575 | -0.685 | -0.705 |
| A001586_01 | NA | NA     | NA     | NA     | NA     | NA     | NA     | -0.579 | NA     |
| A001593_01 |    | -0.68  | -0.302 | -0.876 | -0.298 | -0.427 | 0.083  | -0.343 | 0.127  |
| A001595_01 |    | 0.789  | 0.525  | -0.106 | 0.144  | 0.06   | 0.035  | NA     | 0.136  |
| A001601_01 | NA | NA     |        | -0.789 | NA     | NA     | NA     | NA     | 0.712  |
| A001602_01 |    | -0.148 | -0.373 | -0.345 | -0.033 | -0.934 | -0.718 | -0.706 | -0.363 |
| A001604_01 |    | -0.561 | -0.432 | -0.231 | 0.015  | -0.06  | 0.009  | -0.154 | 0.141  |
| A001605_01 |    | -0.172 | 0.131  | -0.238 | -0.049 | -0.229 | 0.168  | 0.086  | 0.122  |
| A001606_01 |    | -0.868 | -0.221 | -0.264 | -0.103 | -0.212 | 0.249  | 0.043  | 0.21   |
| A001609_01 |    | 0.395  | 0.561  | 0.208  | 0.276  | 0.127  | 0.319  | 0.289  | 0.27   |

|            |    |          |           |           |           |           |           |           |        |
|------------|----|----------|-----------|-----------|-----------|-----------|-----------|-----------|--------|
| A001610_01 |    | -0.57    | -0.108    | 0.181     | 0.207     | -0.374    | -0.05     | -0.063    | 0.095  |
| A001611_01 | NA | NA       |           | 0.286     | 0.596 NA  | NA        |           | 0.324     | 0.346  |
| A001612_01 |    | 0.979    | 0.698     | 0.614     | 0.597     | 0.978     | 1.151     | 1.063     | 1.161  |
| A001613_01 |    | 0.505    | 0.355     | 0.113     | 0.127     | -0.105    | -0.026    | -0.049    | 0.004  |
| A001619_01 |    | -0.901   | -0.445    | -0.054    | 0.006     | -0.579    | -0.495    | -0.472    | -0.445 |
| A001621_01 |    | 0.433 NA |           | -0.067 NA |           | -0.139 NA | NA        | NA        |        |
| A001624_01 | NA | NA       |           | 0.254     | 0.566 NA  |           | 0.449 NA  |           | 0.566  |
| A001631_01 |    | -0.682   | -0.858 NA | NA        |           | -1.107    | -0.932 NA | NA        |        |
| A001645_01 |    | -0.541   | -0.344    | -0.937    | -0.639    | -0.487    | -0.316    | -0.349    | -0.19  |
| A001651_01 | NA | NA       |           | -0.149    | 0.109     | -0.37 NA  |           | -0.129 NA |        |
| A001652_01 | NA | NA       |           | -0.378 NA |           | -0.238 NA | NA        |           | 0.18   |
| A001663_01 |    | 0.261    | 0.553     | -0.857 NA |           | -0.225    | 0.451     | 0.013 NA  |        |
| A001664_01 | NA | NA       |           | -0.875 NA | NA        | NA        | NA        | NA        |        |
| A001670_01 | NA |          | 0.194     | -0.745 NA |           | -0.399 NA | NA        | NA        |        |
| A001671_01 |    | 0.698    | 0.814     | -0.149    | 0.079     | 0.837     | 1.054     | 0.437     | 0.783  |
| A001675_01 |    | 0.556    | 0.464     | -0.598    | -0.242    | -0.059    | 0.053     | -0.204    | -0.007 |
| A001677_01 | NA | NA       |           | -0.301    | -0.007    | -0.31 NA  |           | -0.17     | 0.104  |
| A001678_01 | NA | NA       |           | -0.274    | -0.072 NA | NA        |           | -0.034 NA |        |
| A001679_01 |    | -1.046   | -1.083    | -2.351    | -1.832    | -1.538    | -1.308    | -1.534    | -1.749 |
| A001681_01 |    | -0.109   | 0.114     | 0.148     | 0.285     | 0.351     | 0.278     | 0.271     | 0.263  |
| A001683_01 | NA | NA       |           | -0.006    | 0.152 NA  | NA        |           | -0.112    | 0.032  |
| A001693_01 | NA | NA       |           | -0.033    | 0.278     | -0.74     | -0.32     | -0.324    | -0.207 |
| A001695_01 | NA | NA       |           | 0.434     | 0.787 NA  | NA        | NA        |           | -0.208 |
| A001696_01 | NA | NA       |           | 0.162     | 0.546 NA  | NA        | NA        |           | 0.232  |
| A001697_01 |    | 0.901    | 0.95      | -0.22     | -0.086    | 0.779     | 0.789     | 0.975     | 0.921  |
| A001711_01 |    | 0.32     | 0.074     | -0.339    | -0.15     | -0.422    | -0.481    | -0.209    | -0.021 |
| A001717_01 |    | 0.331    | 0.225     | -0.291    | -0.161    | 0.057     | 0.107     | 0.137     | 0.244  |
| A001719_01 |    | 0.135    | 0.141     | -0.119    | -0.074    | -0.189    | -0.05     | -0.059    | -0.17  |
| A001720_01 |    | -2.215   | -2.921 NA | NA        |           | -2.615    | -2.311 NA | NA        |        |
| A001728_01 |    | 0.108    | 0.291     | -0.01     | 0.249     | 0.155     | 0.262     | 0.006     | 0.223  |
| A001736_01 |    | 0.306    | 0.31      | 0.212     | 0.175     | 0.27      | 0.315     | 0.046     | 0.034  |
| A001740_01 |    | 0.17     | 0.211     | 0.12      | 0.224     | -0.276    | -0.194    | -0.511    | -0.246 |
| A001745_01 |    | -0.72    | -0.731 NA | NA        |           | -1.201 NA | NA        | NA        |        |
| A001748_01 | NA | NA       |           | -0.138    | 0.308     | -0.39     | 0.235     | -0.232    | 0.061  |
| A001750_01 |    | 0.301    | 0.217     | -0.006    | -0.009    | 0.216     | 0.281     | 0.282     | 0.234  |
| A001756_01 |    | 0.433    | 0.598     | -0.392    | 0.118     | 0.057     | 0.311     | -0.082    | 0.266  |
| A001757_01 |    | 0.272    | 0.452     | -0.298    | -0.111    | -0.017    | 0.237     | -0.146    | 0.21   |
| A001758_01 | NA | NA       |           | -0.345 NA |           | -0.642 NA |           | -0.46 NA  |        |
| A001760_01 | NA | NA       |           | -0.754 NA | NA        | NA        | NA        | NA        |        |
| A001770_01 |    | 0.814    | 0.71      | -0.413    | 0.051     | 0.23      | 0.735     | 0.352     | 0.772  |
| A001773_01 |    | 0.066    | 0.149     | 0.573     | 0.384     | 0.211     | 0.169     | 0.134     | 0.111  |
| A001779_01 |    | -0.346   | -0.407    | -0.553 NA |           | -0.787    | -0.354    | -0.604 NA |        |
| A001783_01 | NA | NA       |           | 0.246     | 0.167 NA  | NA        |           | -0.532    | -0.676 |
| A001785_01 |    | 0.292    | 0.701     | 0.26      | 0.544 NA  | NA        | NA        |           | 0.276  |
| A001789_01 |    | 0.71     | 0.711     | -0.052    | 0.214     | 0.559     | 0.909     | 0.71      | 0.799  |
| A001790_01 |    | 0.447    | 0.535     | 0.013     | 0.002     | 0.668     | 0.826     | 0.677     | 0.82   |
| A001791_01 | NA | NA       |           | -0.193    | -0.012 NA | NA        |           | 0.031     | 0.023  |
| A001800_01 |    | 0.986 NA |           | -0.04 NA  | NA        | NA        |           | 1.082     | 1.133  |
| A001801_01 |    | 0.61     | 0.611     | 0.473     | 0.404     | 0.124     | 0.235     | 0.254     | 0.122  |
| A001803_01 |    | -0.357   | -0.135    | -0.174    | -0.061    | -0.347    | 0.163     | -0.188    | 0.079  |
| A001804_01 |    | -0.353   | -0.175    | -0.25     | -0.156    | -0.312    | 0.012     | -0.048    | 0.022  |
| A001807_01 |    | 0.459 NA |           | 0.048     | 0.42      | 0.441     | 0.7       | 0.028     | 0.392  |
| A001819_01 | NA |          | 0.211     | -0.382 NA |           | -0.27     | -0.195    | -0.397 NA |        |
| A001826_01 |    | 0.43     | 0.283     | -0.097    | 0.127     | 0.23      | -0.077    | 0.103     | 0.023  |
| A001827_01 | NA | NA       |           | 0.029     | 0.143 NA  | NA        |           | 0.082     | 0.293  |
| A001833_01 | NA | NA       |           | -0.376    | -0.133 NA | NA        |           | 0.06      | 0.162  |
| A001838_01 |    | 0.324    | 0.124     | 0.11      | 0.277     | -0.138    | -0.019    | -0.01     | 0.038  |
| A001842_01 |    | -0.751   | -0.498    | 0.316     | 0.464     | -0.672    | -0.441    | -0.097    | -0.136 |
| A001843_01 |    | -0.159   | -0.294    | -0.029    | 0.113     | -0.612    | -0.694    | -0.429    | -0.352 |
| A001848_01 |    | 0.016    | 0.251     | -0.338    | -0.085    | -0.236    | 0.133     | 0.021     | 0.228  |
| A001861_01 |    | -0.4     | -0.325    | 0.27      | 0.33      | 0.381     | 0.396     | 0.246     | 0.366  |
| A001864_01 |    | -0.385   | -0.067    | 0.293     | 0.283     | -0.484    | -0.344    | -0.318    | -0.223 |
| A001865_01 |    | 0.613 NA |           | -0.396 NA |           | -0.084 NA | NA        | NA        |        |
| A001867_01 | NA | NA       |           | -0.345    | 0.08      | -0.161    | -0.03     | 0.245     | 0.266  |
| A001868_01 |    | 0.071    | 0.297     | -0.237    | 0.375     | -0.298    | 0.218     | -0.051 NA |        |
| A001869_01 |    | -0.293   | 0.386     | 0.137     | 0.12      | -0.202    | 0.528     | 0.206     | 0.119  |
| A001870_01 | NA | NA       |           | -0.166 NA |           | -0.446 NA | NA        | NA        |        |
| A001874_01 | NA | NA       |           | 0.254     | 0.243     | 0.443     | 0.551     | 0.256     | 0.315  |

|            |    |           |        |           |           |           |           |           |        |
|------------|----|-----------|--------|-----------|-----------|-----------|-----------|-----------|--------|
| A001880_01 |    | 0.292 NA  |        | 0.417     | 0.4       | 0.738     | 1.004     | 0.242     | 0.281  |
| A001883_01 |    | 0.072     | -0.2   | -0.109    | 0.046     | -0.5      | -0.393    | -0.368    | -0.19  |
| A001884_01 | NA | NA        |        | -0.247    | 0.042     | 0.013     | 0.128     | -0.045    | -0.114 |
| A001886_01 |    | 0.579     | 0.677  | -0.313    | 0.071     | 0.124     | 0.216     | 0.08      | 0.102  |
| A001889_01 |    | 0.153     | 0.465  | 0.091     | 0.336     | -0.416    | 0.13      | 0.046     | 0.35   |
| A001894_01 |    | -1.341    | -0.932 | -0.135 NA |           | -0.65 NA  |           | 0.158     | 0.387  |
| A001898_01 |    | -1.081 NA |        | 0.364     | 0.221     | -0.51 NA  |           | -0.193    | -0.292 |
| A001901_01 |    | 0.125     | -0.014 | -0.105    | -0.132    | -0.049    | 0.031     | -0.14     | -0.252 |
| A001903_01 |    | 0.234     | 0.388  | -0.568    | -0.543 NA |           | NA        | -0.324    | -0.451 |
| A001904_01 |    | 0.465     | 0.083  | -0.434    | -0.258    | -0.188    | -0.422    | -0.381    | -0.34  |
| A001912_01 | NA | NA        |        | 0.557     | 0.713 NA  |           | NA        | 0.209     | 0.288  |
| A001913_01 |    | -0.65     | -0.15  | 0.933     | 0.802     | 0.64      | 0.542     | 0.598     | 0.608  |
| A001915_01 |    | -1.076    | -0.698 | -0.217    | -0.136    | -0.53     | -0.403    | -0.328    | -0.283 |
| A001917_01 |    | 0.652     | 0.425  | 0.073     | 0.104     | 0.903     | 0.837     | 0.788     | 0.86   |
| A001918_01 |    | -1.289    | -0.647 | -0.013    | 0.14      | -0.064    | 0.13      | -0.005    | 0.147  |
| A001920_01 |    | 0.301     | 0.318  | -0.1      | -0.072    | 0.237     | 0.017     | -0.097    | -0.095 |
| A001924_01 |    | 0.201     | -0.109 | -0.028    | 0.195     | 0.716     | 0.565     | 0.099     | 0.196  |
| A001929_01 | NA | NA        |        | -0.001    | -0.068 NA |           | NA        | 0.422     | 0.43   |
| A001932_01 | NA |           | 0.474  | 0.109 NA  |           | 0.473     | 0.522     | 0.352     | 0.282  |
| A001934_01 |    | -1.452    | -0.695 | -0.508    | -0.207    | -0.058    | 0.07      | 0.001     | 0.11   |
| A001936_01 |    | -0.122    | -0.073 | -0.955    | -0.693    | -1.131    | -1.055    | -0.781    | -0.85  |
| A001937_01 |    | 0.184     | 0.225  | -0.133    | 0.089     | -0.328    | -0.364    | -0.161    | -0.034 |
| A001939_01 | NA | NA        |        | -0.718    | -0.415    | 0.001 NA  |           | -0.293    | -0.272 |
| A001945_01 |    | 0.054     | 0.245  | 0.055     | 0.206     | 0.078     | 0.051     | -0.301    | -0.159 |
| A001946_01 |    | -0.369    | -0.114 | 0.304     | 0.277     | -0.166    | 0.089     | 0.002     | 0.058  |
| A001952_01 |    | 0.05      | 0.032  | -0.047    | -0.086    | 0.341     | 0.095     | 0.046     | -0.057 |
| A001957_01 | NA | NA        |        | -0.699    | -0.467 NA |           | 0.466     | 0.072     | 0.071  |
| A001958_01 | NA |           | 0.257  | 0.04 NA   |           | NA        | NA        |           | 0.282  |
| A001959_01 |    | -0.573    | -0.196 | 0.452     | 0.446     | 0.032     | 0.197     | 0.002     | -0.022 |
| A001961_01 | NA | NA        |        | 0.303     | 0.45 NA   |           | NA        | 0.2       | 0.116  |
| A001962_01 |    | 0.248     | 0.256  | -0.209    | 0.003     | 0.32      | 0.279     | 0.096     | 0.305  |
| A001963_01 |    | 0.305     | 0.379  | -0.109    | 0.09      | 0.164     | 0.298     | -0.056    | 0.092  |
| A001964_01 |    | 0.198     | 0.11   | -0.108    | -0.02     | -0.152    | -0.036    | -0.02     | -0.073 |
| A001966_01 |    | 0.358     | 0.217  | 0.029     | 0.126     | 0.459     | 0.438     | 0.333     | 0.3    |
| A001967_01 |    | -1.082    | -0.957 | -0.991 NA |           | -0.675    | -0.444    | -0.539 NA |        |
| A001970_01 |    | -0.543    | -0.116 | 0.559     | 0.41      | 0.679     | 0.648     | 0.125     | 0.155  |
| A001974_01 |    | 0.775     | 0.52   | 0.064     | 0.161     | 0.515     | 0.434     | 0.123     | 0.11   |
| A001975_01 |    | -0.523    | -0.345 | 0.198     | 0.247     | -0.465    | -0.291    | -0.153 NA |        |
| A001979_01 |    | 0.597     | 0.573  | -0.116    | -0.004    | 0.025     | 0.237     | 0.168     | 0.334  |
| A001980_01 |    | -0.307    | 0.111  | -0.174    | -0.024    | -0.659    | -0.052    | -0.137    | -0.14  |
| A001984_01 |    | -0.433 NA |        | -0.357    | -0.332    | -0.541 NA |           | -0.06     | -0.119 |
| A001986_01 |    | 0.374     | 0.476  | 0.197     | 0.197     | -0.047    | 0.25      | 0.199     | 0.222  |
| A001988_01 |    | -1.056    | -0.525 | -1.433    | -1.163    | -0.941    | -0.82     | -1.144    | -0.816 |
| A001990_01 | NA | NA        |        | -0.079 NA |           | 0.418 NA  |           | 0.532     | 0.581  |
| A001996_01 |    | -0.709    | -0.053 | -0.29 NA  |           | -0.267    | -0.102 NA |           | NA     |
| A001997_01 | NA | NA        |        | -0.501    | -0.376 NA |           | NA        | -0.036    | 0.109  |
| A002002_01 | NA |           | -0.781 | 0.131     | 0.209     | -0.71     | -0.419    | -0.02     | -0.031 |
| A002003_01 | NA | NA        |        | 0.281 NA  |           | NA        | NA        |           | NA     |
| A002008_01 |    | -0.462    | 0.168  | -0.206    | -0.034    | -0.19     | 0.416     | 0.214     | 0.449  |
| A002009_01 |    | 0.284     | 0.257  | 0.223     | 0.25      | 0.025     | 0.385     | 0.022     | 0.33   |
| A002011_01 |    | -1.26     | -0.502 | 0.521     | 0.427     | -0.38     | -0.041    | 0.281     | 0.17   |
| A002013_01 |    | 0.395     | 0.721  | 0.329     | 0.329     | 0.361     | 0.434     | 0.291     | 0.326  |
| A002014_01 |    | 0.143     | 0.442  | 0.084     | 0.006     | -0.233    | 0.144     | 0.105     | 0.038  |
| A002016_01 | NA | NA        |        | 0.272     | 0.359     | 0.032 NA  |           | 0.212     | 0.211  |
| A002017_01 |    | 0.578     | 0.597  | -0.555    | -0.298 NA |           | NA        | -0.437    | -0.358 |
| A002023_01 |    | 0.16      | 0.362  | 0.394     | 0.49      | -0.187    | -0.266    | -0.267    | -0.137 |
| A002026_01 |    | 0.111     | 0.225  | -0.259    | -0.163    | -0.166    | 0.2       | 0.137     | 0.227  |
| A002031_01 |    | 0.175     | 0.287  | 0.474     | 0.404     | -0.027    | -0.091    | 0.364     | 0.376  |
| A002032_01 |    | 0.027     | 0.216  | -0.059    | 0.07      | 0.499     | 0.398     | 0.009     | 0.256  |
| A002033_01 |    | 0.264     | 0.158  | -0.207    | -0.07     | -0.023    | 0.249     | 0.12      | 0.278  |
| A002035_01 |    | 0.654     | 0.731  | 0.279     | 0.355     | 0.333     | 0.559     | 0.293     | 0.485  |
| A002037_01 |    | 0.334     | 0.401  | -0.273    | -0.136    | 0.181     | 0.593     | 0.224     | 0.64   |
| A002038_01 |    | 0.25      | 0.56   | 0.065     | 0.244     | 0.522     | 0.394     | -0.081    | 0.152  |
| A002045_01 |    | -0.321    | -0.257 | -1.674    | -1.31 NA  |           | -1.472    | -1.27     | -1.171 |
| A002050_01 |    | 0.651     | 0.712  | 0.166 NA  |           | 0.524     | 0.56      | 0.678     | 0.612  |
| A002052_01 |    | -0.399    | -0.246 | -0.129    | 0.155     | -0.613    | -0.697    | -0.553    | -0.237 |
| A002054_01 |    | 0.793     | 0.598  | 0.142     | 0.198     | 0.608     | 0.601     | 0.341     | 0.4    |
| A002059_01 | NA | NA        |        | 0.242     | 0.387     | -0.391 NA |           | -0.15     | 0.031  |

|            |    |           |        |           |           |           |        |           |        |
|------------|----|-----------|--------|-----------|-----------|-----------|--------|-----------|--------|
| A002061_01 | NA | NA        |        | 0.55      | 0.391     | 0.137     | 0.323  | -0.052    | -0.099 |
| A002062_01 |    | -0.787    | -1.041 | 0.043     | 0.219     | -1.759    | -1.868 | -1.44     | -1.244 |
| A002065_01 |    | 0.553     | 0.659  | 0.259     | 0.401     | 0.342     | 0.66   | 0.382     | 0.511  |
| A002066_01 |    | -0.002    | 0.111  | 0.135     | 0.128     | -0.186    | -0.249 | -0.034    | -0.023 |
| A002067_01 | NA |           | 0.476  | 0         | 0.149     | 0.253     | 0.413  | 0.407     | 0.411  |
| A002068_01 |    | 0.588     | 0.392  | 0.6       | 0.47      | -0.217    | -0.247 | -0.062    | -0.097 |
| A002070_01 |    | -0.975    | 0.273  | 0.284     | 0.349     | 0.007     | -0.055 | -0.112    | -0.052 |
| A002073_01 |    | -0.342    | 0.109  | 0.385     | 0.405     | 0.943     | 1.007  | 0.712     | 0.902  |
| A002075_01 |    | -0.146    | 0.323  | 0.112     | 0.03      | -0.009    | 0.382  | 0.165     | 0.044  |
| A002076_01 |    | -0.614    | -0.209 | -0.624    | -0.513    | -0.274    | -0.084 | 0.104     | 0.116  |
| A002079_01 | NA | NA        |        | -0.225    | -0.156    | 0.126     | 0.036  | 0.137     | 0.037  |
| A002080_01 |    | -1.588    | -1.237 | -0.92     | -0.729    | -1.38     | -1.001 | -0.924    | -0.969 |
| A002081_01 |    | -1.266    | -0.868 | -1.081    | -0.81     | -0.987    | -0.761 | -0.624    | -0.684 |
| A002082_01 | NA |           | 0.357  | -0.043    | 0.003 NA  |           | 0.236  | -0.131    | -0.182 |
| A002083_01 | NA | NA        |        | -0.17     | -0.167    | -0.555 NA |        | 0.198     | 0.078  |
| A002085_01 |    | 0.043     | -0.083 | -0.139    | -0.028    | 0.205     | 0.343  | 0.065     | 0.094  |
| A002086_01 |    | -1.283    | -1.235 | -0.811    | -0.583    | -1.22     | -1.169 | -1.177    | -0.912 |
| A002087_01 |    | 0.679     | 0.358  | -0.803    | -0.483 NA |           | -1.096 | -1.04     | -0.621 |
| A002088_01 |    | -0.601 NA |        | -0.257    | 0.002     | -0.6 NA   |        | 0.173     | 0.385  |
| A002089_01 | NA | NA        |        | -0.076    | 0.05      | -0.131 NA | NA     | NA        | NA     |
| A002090_01 |    | -0.107    | 0.001  | -0.091    | -0.023    | -0.352    | -0.233 | -0.182    | -0.242 |
| A002092_01 | NA | NA        |        | -0.416 NA | NA        | NA        | NA     |           | 0.368  |
| A002094_01 |    | -1        | -0.735 | -0.929    | -0.641    | -0.884    | -0.919 | -1.033    | -1.014 |
| A002096_01 |    | -0.838    | -0.212 | 0.135     | 0.317     | 0.067     | 0.084  | 0.041     | 0.211  |
| A002102_01 |    | 0.186     | 0.286  | -0.198    | -0.074    | -0.894    | -0.516 | -0.559    | -0.5   |
| A002103_01 |    | -0.802    | -0.19  | 0.065     | 0.113     | -0.36     | -0.215 | -0.071    | -0.298 |
| A002116_01 |    | -0.479    | -0.26  | -0.667    | -0.418    | -0.31     | -0.275 | -0.348    | -0.435 |
| A002117_01 | NA | NA        |        | -0.336    | -0.243 NA | NA        | NA     |           | 0.46   |
| A002118_01 |    | -0.187    | 0.331  | -0.107    | 0.071     | -0.302    | 0.511  | 0.276     | 0.686  |
| A002120_01 |    | 0.553     | 0.831  | 0.845     | 0.836     | 0.226     | 0.141  | 0.79      | 0.893  |
| A002126_01 | NA | NA        |        | -0.323    | -0.234 NA | NA        |        | 0.025     | 0.03   |
| A002130_01 |    | -0.015 NA |        | 0.253 NA  |           | 0.307 NA  |        | 0.279     | 0.253  |
| A002138_01 |    | 0.469     | 0.419  | -0.671    | -0.53     | 0.263     | 0.54   | 0.001     | 0.447  |
| A002142_01 |    | 0.383     | 0.339  | -0.494    | -0.237    | 0.055     | 0.185  | 0.08      | 0.332  |
| A002146_01 |    | -1.473    | -1.042 | -0.278    | -0.121    | -1.003    | -0.671 | -0.719    | -0.777 |
| A002147_01 |    | -0.701    | -0.449 | -0.001    | 0.11 NA   |           | 0.139  | -0.079    | -0.047 |
| A002148_01 |    | -0.63     | -0.443 | -0.216    | -0.106    | -0.422    | -0.246 | -0.306    | -0.281 |
| A002149_01 |    | -0.122    | 0.281  | 0.417     | 0.372     | 1.263     | 1.196  | 1.144     | 0.976  |
| A002160_01 |    | 0.147     | 0.366  | 0.377     | 0.397     | 0.151     | 0.333  | 0.172     | 0.094  |
| A002165_01 |    | 0.702     | 0.525  | -0.082    | 0.04      | 0.601     | 0.782  | 0.386     | 0.642  |
| A002171_01 | NA | NA        |        | -0.088    | 0.19 NA   | NA        | NA     | NA        | NA     |
| A002175_01 |    | -0.36     | -0.228 | -0.143    | -0.094    | -0.153    | -0.171 | -0.127    | -0.436 |
| A002176_01 |    | -0.452    | 0.014  | 0.258     | 0.288     | 0.223     | 0.444  | 0.134     | 0.078  |
| A002178_01 | NA | NA        |        | 0.374     | 0.35 NA   | NA        |        | -0.074 NA |        |
| A002180_01 | NA | NA        |        | -0.144 NA | NA        | NA        |        | -0.109 NA |        |
| A002183_01 | NA | NA        |        | -0.722 NA | NA        | NA        |        | -0.558 NA |        |
| A002184_01 |    | 0.556     | 0.894  | 0.562     | 0.556     | 0.775     | 0.866  | 0.715     | 0.792  |
| A002198_01 | NA | NA        |        | -0.339 NA | NA        | NA        |        | -0.337 NA |        |
| A002199_01 | NA | NA        |        | -0.242    | -0.045    | -0.468 NA |        | -0.512    | -0.516 |
| A002206_01 |    | -0.349    | -0.146 | -0.035    | -0.039    | 0.011     | 0.059  | 0.047     | -0.069 |
| A002210_01 |    | -1.264    | -0.964 | 0.259     | 0.292     | -0.671    | -0.524 | -0.555    | -0.62  |
| A002214_01 |    | -0.216    | 0.034  | 0.2       | 0.282     | -0.147    | -0.162 | -0.04     | 0.057  |
| A002218_01 |    | 0.756     | 0.987  | -0.005    | 0.171 NA  |           | 0.361  | -0.686    | -0.682 |
| A002220_01 |    | 0.015     | 0.139  | 0.163     | 0.056     | 1.033     | 0.737  | 0.618     | 0.58   |
| A002224_01 |    | 0.503     | 0.641  | 0.323     | 0.446     | 0.381     | 0.669  | 0.723     | 0.913  |
| A002230_01 |    | -0.012    | 0.248  | -0.479    | -0.353    | 0.267     | 0.387  | 0.001     | 0.256  |
| A002232_01 |    | -0.668    | -0.22  | -0.268 NA |           | -0.205    | -0.018 | 0.105     | -0.003 |
| A002235_01 |    | 0.967     | 1.058  | 0.653     | 0.8       | 0.253     | 0.351  | -0.101    | -0.041 |
| A002237_01 |    | 0.006     | 0.171  | 0.036     | 0.052     | -0.08     | 0.118  | 0.018     | 0.169  |
| A002243_01 | NA | NA        |        | 0.136     | 0.175     | -0.102 NA |        | -0.241    | -0.245 |
| A002244_01 |    | 0.315     | 0.377  | -0.038    | 0.015     | 0.491     | 0.58   | 0.445     | 0.485  |
| A002246_01 | NA | NA        |        | -0.316    | -0.22     | -0.148 NA |        | -0.227    | -0.507 |
| A002258_01 |    | -0.621    | -0.359 | -0.369    | -0.232    | -0.854    | -0.581 | -0.607    | -0.691 |
| A002259_01 |    | 0.232     | 0.171  | -0.622    | -0.294    | -0.386    | -0.207 | -0.291    | -0.256 |
| A002260_01 |    | -0.828    | -0.212 | -0.082    | 0.083     | -0.226    | -0.09  | 0.071     | 0.2    |
| A002266_01 |    | -1.474    | -0.644 | 0.325     | 0.363     | -0.169    | 0.074  | 0.064     | 0.008  |
| A002267_01 |    | 0.807     | 0.939  | -0.274    | -0.075    | 0.437     | 0.476  | 0.57      | 0.4    |
| A002272_01 |    | 0.165     | 0.323  | -0.013    | -0.104    | 0.152     | 0.257  | -0.057    | -0.028 |

|            |    |        |        |        |       |        |        |        |        |        |
|------------|----|--------|--------|--------|-------|--------|--------|--------|--------|--------|
| A002283_01 |    | 0.538  | 0.371  | 0.201  | 0.369 | 0.068  | 0.083  | NA     | NA     |        |
| A002284_01 | NA | NA     |        | 0.128  | 0.22  | NA     | NA     |        | -0.179 | -0.238 |
| A002285_01 |    | 0.876  | 0.583  | -0.368 | NA    | 0.162  | NA     | NA     | NA     |        |
| A002294_01 |    | 1.045  | 0.716  | 0.297  |       | 0.184  | 0.312  | 0.241  | 0.413  | 0.332  |
| A002308_01 |    | 0.073  | -0.354 | -0.207 |       | -0.107 | -0.413 | -0.266 | -0.219 | NA     |
| A002329_01 |    | -0.633 | NA     | 0.053  |       | 0.241  | -0.027 | 0.102  | 0.062  | 0.217  |
| A002330_01 |    | -0.85  | -0.237 | -0.265 |       | 0.008  | 0.247  | 0.351  | 0.266  | 0.41   |
| A002338_01 |    | -0.081 | 0.124  | -0.065 |       | 0.226  | 0.208  | NA     | NA     | 0.056  |
| A002345_01 | NA |        | 0.001  | 0.238  |       | 0.423  | 0.021  | 0.136  | -0.318 | -0.13  |
| A002346_01 |    | -0.015 | 0.124  | 0.146  |       | 0.262  | 0.54   | 0.501  | 0.805  | 0.868  |
| A002349_01 |    | 0.851  | 0.8    | 0.355  |       | 0.451  | 0.934  | 0.999  | 0.514  | 0.906  |
| A002356_01 | NA |        | 0.129  | 0.093  |       | 0.245  | NA     | NA     | NA     | NA     |
| A002359_01 |    | -1.106 | -0.576 | 0.596  |       | 0.562  | -0.207 | -0.091 | 0.133  | 0.062  |
| A002363_01 |    | 0.341  | 0.484  | 0.621  |       | 0.565  | 0.363  | 0.18   | 0.189  | 0.28   |
| A002365_01 |    | -0.516 | NA     | -0.079 |       | 0.093  | 0.158  | 0.244  | 0.275  | 0.215  |
| A002368_01 |    | 0.008  | 0.087  | 0.205  |       | 0.108  | -0.176 | 0.045  | -0.047 | -0.109 |
| A002369_01 |    | 0.205  | 0.112  | -0.491 |       | -0.272 | 0.124  | 0.339  | -0.027 | 0.226  |
| A002370_01 | NA | NA     |        | -0.17  |       | -0.004 | -0.287 | 0.16   | 0.035  | 0.247  |
| A002372_01 |    | 0.207  | 0.142  | -0.009 |       | 0.148  | 0.115  | 0.194  | 0.152  | 0.251  |
| A002374_01 |    | 0.706  | 0.523  | -0.722 | NA    |        | -0.25  | -0.173 | NA     | NA     |
| A002376_01 |    | 0.397  | NA     | 0.584  |       | 0.722  | NA     | NA     | NA     | 0.607  |
| A002378_01 |    | 0.018  | 0.004  | 0.052  |       | 0.343  | 0.087  | 0.185  | NA     | 0.28   |
| A002383_01 | NA |        | -0.329 | -0.701 |       | -0.368 | NA     | -0.533 | -0.598 | -0.423 |
| A002385_01 |    | 0.198  | 0.212  | 0.321  |       | 0.455  | 0.282  | 0.366  | 0.331  | 0.181  |
| A002387_01 |    | 0.052  | 0.295  | 0.442  |       | 0.312  | -0.003 | -0.092 | -0.06  | -0.077 |
| A002390_01 |    | -0.151 | NA     | -0.013 |       | 0.218  | -0.383 | NA     | -0.14  | -0.061 |
| A002393_01 |    | 0.171  | 0.366  | -0.274 |       | -0.042 | 0.412  | 0.423  | 0.036  | 0.087  |
| A002405_01 |    | -0.343 | NA     | -0.182 | NA    |        | 0.91   | 0.736  | 0.705  | 0.624  |
| A002408_01 |    | 1.119  | 0.882  | 0.41   |       | 0.513  | 0.884  | 0.68   | 0.513  | 0.593  |
| A002409_01 |    | -1.857 | -2.474 | NA     | NA    |        | -1.304 | -1.357 | NA     | NA     |
| A002412_01 |    | -0.711 | NA     | -0.016 |       | 0.119  | -0.337 | -0.19  | -0.265 | -0.172 |
| A002413_01 | NA | NA     |        | -0.127 |       | 0.355  | NA     | NA     | -0.532 | -0.12  |
| A002417_01 |    | 0.741  | 1.056  | 0.05   |       | 0.204  | 0.734  | 0.793  | 0.778  | 0.925  |
| A002418_01 |    | -1.176 | -1.694 | -2.498 |       | -1.813 | -1.392 | -1.408 | -1.75  | -1.702 |
| A002425_01 |    | 0.772  | 0.518  | -0.033 |       | 0.221  | NA     | 0.099  | NA     | NA     |
| A002429_01 | NA |        | 0.177  | -0.155 |       | 0.213  | 0.042  | 0.195  | -0.159 | -0.013 |
| A002432_01 |    | -0.202 | -0.014 | -0.32  |       | -0.061 | -0.089 | 0.04   | -0.198 | 0.056  |
| A002433_01 |    | -2.833 | -3.301 | NA     | NA    |        | -2.638 | -2.745 | NA     | NA     |
| A002437_01 |    | -0.011 | 0.089  | -0.537 |       | -0.358 | 0.264  | 0.473  | 0.598  | 0.71   |
| A002441_01 |    | -0.879 | NA     | 0.536  |       | 0.527  | 0.239  | 0.471  | 0.18   | 0.254  |
| A002454_01 |    | 0.377  | 0.802  | -0.426 | NA    |        | 0.134  | 0.356  | 0.28   | 0.589  |
| A002461_01 | NA | NA     |        | -0.074 |       | 0.185  | -0.43  | NA     | -0.116 | -0.123 |
| A002473_01 |    | -0.565 | -0.249 | 0.216  |       | 0.214  | -0.36  | 0.03   | 0.066  | 0.293  |
| A002476_01 |    | 0.326  | 0.89   | -0.403 |       | 0.403  | 0.151  | 0.582  | 0.069  | 0.619  |
| A002480_01 | NA | NA     |        | 0.498  |       | 0.51   | NA     | NA     | -0.266 | -0.046 |
| A002484_01 |    | -0.202 | -0.1   | -0.523 |       | -0.323 | -0.458 | -0.288 | -0.269 | -0.373 |
| A002488_01 |    | -0.834 | -0.257 | 0.226  |       | 0.242  | -0.05  | 0.037  | -0.278 | -0.202 |
| A002489_01 | NA | NA     |        | -0.257 | NA    |        | NA     | NA     | -0.222 | 0.108  |
| A002491_01 |    | -0.645 | -0.644 | -0.235 |       | -0.182 | -0.537 | -0.379 | -0.253 | -0.495 |
| A002506_01 | NA | NA     |        | 0.008  |       | 0.187  | -0.094 | 0.284  | 0.035  | 0.238  |
| A002514_01 |    | 0.606  | 0.986  | -0.161 |       | -0.001 | -0.233 | -0.094 | -0.361 | -0.324 |
| A002522_01 |    | 0.348  | 0.44   | -0.027 |       | 0.049  | 0.491  | 0.526  | 0.153  | 0.265  |
| A002523_01 |    | -0.126 | -0.025 | -0.449 |       | -0.091 | -0.04  | 0.122  | 0.168  | 0.243  |
| A002525_01 |    | 0.374  | NA     | -0.544 |       | -0.237 | 0.516  | 0.762  | -0.862 | -0.849 |
| A002534_01 |    | 0.435  | 0.03   | 0.183  |       | 0.254  | 0.067  | -0.198 | -0.129 | -0.073 |
| A002535_01 | NA | NA     |        | -0.128 |       | 0.184  | -0.026 | NA     | -0.204 | -0.018 |
| A002537_01 |    | 0.146  | NA     | NA     | NA    |        | -0.814 | NA     | NA     | NA     |
| A002539_01 |    | -0.81  | NA     | -0.551 |       | -0.484 | -0.972 | NA     | -0.789 | -0.845 |
| A002540_01 |    | 0.433  | 0.239  | -0.341 |       | 0.056  | -0.155 | -0.05  | -0.176 | 0.094  |
| A002542_01 |    | -0.34  | 0.271  | 0.285  |       | 0.593  | 0.477  | 0.557  | 0.535  | 0.775  |
| A002545_01 |    | 0.195  | -0.025 | -0.356 |       | -0.209 | -0.26  | -0.352 | -0.291 | -0.378 |
| A002557_01 |    | 0.645  | 0.523  | -0.093 |       | 0.177  | -0.062 | NA     | -0.116 | 0.093  |
| A002558_01 |    | -0.249 | 0.064  | 0.035  |       | 0.178  | 0.095  | 0.027  | 0.035  | 0.104  |
| A002560_01 |    | 0.315  | NA     | -0.114 |       | 0.052  | 0.024  | 0.282  | 0.036  | 0.22   |
| A002561_01 |    | -0.131 | 0.083  | -0.072 |       | 0.047  | -0.202 | -0.214 | -0.397 | -0.288 |
| A002562_01 |    | -0.324 | -0.133 | -0.145 |       | 0.046  | -0.685 | -0.322 | -0.372 | -0.301 |
| A002580_01 |    | 1.166  | 1.332  | 0.638  |       | 0.628  | -0.097 | 0.037  | 0.125  | 0.157  |
| A002588_01 |    | 0.108  | -0.084 | -0.013 |       | 0.042  | -0.657 | -0.538 | -0.274 | -0.306 |

|            |    |           |           |           |           |           |         |           |        |
|------------|----|-----------|-----------|-----------|-----------|-----------|---------|-----------|--------|
| A002592_01 |    | -0.514    | 0.004     | 0.018     | 0.188     | -0.178    | 0.055   | -0.127    | 0.203  |
| A002599_01 |    | 0.666     | 0.358     | -0.22     | 0.077     | -0.355    | -0.209  | -0.201    | 0.133  |
| A002608_01 |    | -0.32     | -0.148    | -0.291    | -0.274    | -0.322    | -0.214  | -0.076    | -0.307 |
| A002609_01 |    | 0.388     | 0.428     | -0.177    | 0.128     | 0.391     | 0.612   | 0.61      | 0.982  |
| A002610_01 |    | -0.658    | -0.274    | -0.083    | 0.044     | -0.636    | -0.271  | -0.34     | -0.379 |
| A002618_01 |    | -0.091    | 0.025     | -0.907 NA |           | -0.4 NA   |         | NA        | NA     |
| A002623_01 | NA | NA        |           | -0.967    | -0.409 NA | NA        |         | -0.128    | 0.071  |
| A002626_01 | NA | NA        |           | -0.107    | 0.173 NA  | NA        |         | -0.016 NA |        |
| A002632_01 |    | 0.101     | 0.238     | -0.004    | 0.29 NA   |           | 0.261   | 0.068     | 0.17   |
| A002634_01 |    | 0.806     | 0.609     | -0.103    | 0.002     | 0.42      | 0.679   | 0.567     | 0.816  |
| A002641_01 |    | -0.403    | -0.239    | 0.141     | 0.254     | -0.181    | 0.213   | -0.139    | 0.051  |
| A002642_01 |    | -0.193    | 0.135     | 0.344     | 0.41      | -0.093    | 0.19 NA |           | 0.209  |
| A002643_01 |    | -3.113    | -2.365    | -2.498    | -1.921    | -2.653    | -1.837  | -1.422    | -1.619 |
| A002644_01 | NA | NA        |           | 0.005     | 0.062 NA  | NA        |         | -0.217    | -0.374 |
| A002646_01 |    | -0.546    | -0.37     | 0.284     | 0.11      | 0.166     | 0.091   | 0.231     | -0.053 |
| A002647_01 |    | -1.097    | -1.048    | -1.086    | -0.728    | -1.332    | -1.2    | -0.739    | -0.798 |
| A002648_01 |    | -0.116    | 0.231     | -0.379    | -0.375    | 0.003     | 0.21    | 0.09      | -0.018 |
| A002650_01 |    | -0.321 NA |           | 0.392     | 0.497     | -0.061 NA |         | -0.382    | -0.374 |
| A002651_01 |    | -1.034 NA |           | -0.45     | -0.263    | -0.93     | -0.445  | -0.844    | -0.678 |
| A002656_01 |    | 0.218     | 0.074     | -0.382    | -0.147    | -0.423    | -0.334  | -0.338    | -0.176 |
| A002658_01 |    | -0.155    | -0.001    | 0.21      | 0.068     | -0.382    | -0.125  | -0.174    | -0.161 |
| A002659_01 |    | -0.365 NA |           | -0.266    | 0.019     | -0.244    | 0.046   | 0.078     | 0.241  |
| A002660_01 | NA | NA        |           | 0.116     | 0.122     | -0.412 NA |         | -0.419    | -0.581 |
| A002662_01 |    | -0.653    | -0.447    | -0.064    | 0.033     | -0.517    | -0.23   | -0.101    | -0.061 |
| A002672_01 |    | 0.865     | 0.45      | 0.018     | 0.059     | 0.423     | 0.524   | 0.396     | 0.631  |
| A002674_01 |    | 0.846     | 0.832     | 0.436     | 0.377     | 0.137     | 0.275   | 0.182     | 0.123  |
| A002675_01 |    | 0.471     | 0.219     | 0.251     | 0.195     | -0.228    | -0.316  | -0.076    | -0.25  |
| A002676_01 |    | -1.128    | -0.661    | 0.754     | 0.538     | -0.251    | 0.302   | -0.294    | -0.378 |
| A002677_01 |    | -1.234    | -1.209    | -1.087    | -0.966    | -1.377    | -1.17   | -0.662    | -0.928 |
| A002678_01 |    | 0.552 NA  |           | -0.384 NA |           | -0.01     | 0.159   | 0.002 NA  |        |
| A002692_01 |    | 0.608     | 0.418     | -0.087    | -0.069    | 0.124     | 0.103   | 0.049     | 0.065  |
| A002695_01 | NA | NA        |           | -0.923    | -0.733    | -1.046 NA |         | -1.297    | -1.394 |
| A002696_01 |    | -0.767    | -1.14     | 0.512     | 0.363     | -0.279    | -0.347  | -0.293    | -0.48  |
| A002699_01 | NA | NA        |           | 0.041     | -0.017    | 0.04 NA   |         | -0.171    | -0.288 |
| A002702_01 |    | 0.15      | 0.438     | 0.24      | 0.062     | 0.739     | 0.43    | 0.482     | 0.495  |
| A002703_01 |    | -0.469 NA |           | 0.074     | 0.297     | 0.237     | 0.256   | 0.12      | 0.301  |
| A002704_01 |    | -0.563    | -0.177    | -0.535    | -0.34     | -0.201    | -0.006  | -0.342    | -0.136 |
| A002706_01 | NA | NA        |           | 0.166     | 0.167 NA  | NA        |         | 0.206     | 0.324  |
| A002712_01 |    | 0.75      | 0.704     | -0.077    | 0.093     | -0.066    | 0.191   | -0.1      | 0.073  |
| A002713_01 |    | 0.299     | 0.261     | 0.002     | 0.039     | -0.166    | -0.289  | -0.151    | -0.209 |
| A002718_01 | NA | NA        |           | 0.299     | 0.158 NA  | NA        |         | 0.061     | -0.089 |
| A002721_01 | NA | NA        |           | 0.126     | 0.18 NA   | NA        |         | 0.007     | -0.012 |
| A002724_01 |    | 0.196     | 0.222     | -0.024    | 0.008     | -0.027    | 0.202   | 0.042     | 0.266  |
| A002732_01 |    | -0.675    | -0.013    | 0.451     | 0.493     | 0.238     | 0.308   | 0.094     | 0.108  |
| A002733_01 |    | -0.4      | 0.096     | 0.366     | 0.348     | 0.107     | 0.093   | 0.099     | 0.043  |
| A002735_01 |    | 0.292     | 0.455     | -0.176    | 0.012     | -0.025    | 0.324   | 0.197     | 0.338  |
| A002736_01 |    | 0.669     | 0.444     | 0.028     | 0.138     | 0.33      | 0.264   | 0.105     | 0.209  |
| A002737_01 |    | 0.017     | 0.123     | 0.111     | 0.109     | 0.173     | 0.422   | 0.494     | 0.488  |
| A002738_01 |    | -1.027    | -1.016    | -0.12     | 0.054     | -1.294    | -1.097  | -0.676    | -0.896 |
| A002741_01 |    | -2.239    | -2.341    | -1.795    | -1.294    | -2.139    | -1.377  | -0.941    | -1.182 |
| A002742_01 |    | -0.422    | -0.018    | -0.244    | -0.171    | -0.051    | 0.032   | -0.158    | -0.217 |
| A002744_01 |    | -0.623    | -0.236    | 0.289     | 0.21      | 0.389     | 0.295   | 0.039     | -0.106 |
| A002750_01 | NA | NA        |           | -0.363    | -0.101    | 0.357     | 0.618   | 0.358     | 0.408  |
| A002762_01 |    | 0.404     | 0.734     | 0.459     | 0.386     | 0.758     | 0.941   | 0.648     | 0.757  |
| A002768_01 |    | 0.031     | 0.026     | -0.147    | -0.072    | -0.621    | -0.566  | -0.231    | -0.111 |
| A002772_01 |    | 0.28      | 0.045     | 0.128     | 0.206     | -0.154    | -0.089  | 0.052     | 0.172  |
| A002773_01 |    | 0.357 NA  |           | -0.179 NA |           | -0.224    | 0.048   | 0.038     | 0.126  |
| A002774_01 |    | -0.146    | -0.313    | -0.216    | -0.147    | -0.538    | -0.531  | -0.757    | -0.487 |
| A002777_01 |    | 0.334 NA  |           | 0.046     | 0.154 NA  | NA        |         | 0.008     | -0.095 |
| A002779_01 |    | -0.72     | -0.525    | -0.298    | -0.002    | -0.432    | -0.482  | -0.554    | -0.599 |
| A002780_01 | NA | NA        |           | 0.291     | 0.368 NA  | NA        |         | 0.002     | 0.041  |
| A002782_01 |    | 0.074     | -0.434 NA | NA        | NA        | NA        | NA      | NA        | NA     |
| A002787_01 |    | -1.622    | -1.317    | -0.927    | -0.582    | -1.5      | -1.101  | -1.149    | -0.961 |
| A002788_01 |    | 0.382     | 0.302     | 0.279     | 0.355     | 0.823     | 0.614   | 0.514     | 0.538  |
| A002793_01 |    | 0.312     | 0.406     | 0.151     | 0.111     | 0.488     | 0.414   | 0.845     | 0.655  |
| A002795_01 |    | 0.488     | 0.184     | -0.509 NA |           | 0.092     | 0.146   | -0.13     | 0.114  |
| A002797_01 | NA | NA        |           | -0.189    | -0.02     | 0.156     | 0.359   | 0.494     | 0.572  |
| A002798_01 |    | -0.362    | 0.071     | 0.448     | 0.48      | 0.445     | 0.361   | 0.382     | 0.237  |

|            |    |           |          |           |           |           |        |           |        |
|------------|----|-----------|----------|-----------|-----------|-----------|--------|-----------|--------|
| A002800_01 |    | -0.388    | -0.172   | 0.442     | 0.421     | 0.465     | 0.699  | 0.047     | 0.317  |
| A002809_01 |    | 0.473     | 0.347    | 0.163     | -0.089    | 0.156     | 0.107  | 0.11      | -0.139 |
| A002818_01 |    | 0.001     | 0.54     | 0.568     | 0.512     | 1.081     | 1.119  | 0.607     | 0.815  |
| A002820_01 |    | -0.065    | -0.079   | 0.272     | 0.517     | -0.222 NA |        | -0.136    | -0.028 |
| A002822_01 |    | -0.212    | -0.046   | -0.287    | -0.134    | -0.341    | -0.129 | -0.347    | -0.29  |
| A002823_01 |    | -0.432    | -0.488   | 0.218     | 0.235     | -0.4      | -0.433 | -0.103    | -0.039 |
| A002830_01 | NA |           | -0.306   | 0.406     | 0.331 NA  |           | 0.023  | -0.301    | -0.341 |
| A002834_01 |    | -0.026    | 0.497    | 0.164     | 0.349     | 0.471     | 0.773  | 0.412     | 0.611  |
| A002838_01 | NA | NA        |          | 0.539     | 0.212 NA  | NA        |        | -0.745    | -1.048 |
| A002841_01 |    | -0.408    | -0.038   | 0.149     | 0.174     | 0.127     | 0.151  | 0.025     | 0.141  |
| A002842_01 |    | -0.081    | -0.248   | -0.545    | -0.271    | -0.992    | -0.966 | -0.818    | -0.754 |
| A002851_01 |    | -0.057    | 0.037    | 0.047     | 0.086     | 0.083     | 0.014  | 0.112     | 0.19   |
| A002854_01 |    | 0.505     | 0.748    | 0.876     | 0.637     | 0.602     | 0.574  | 0.514     | 0.475  |
| A002855_01 |    | 0.397     | 0.608    | 0.189     | 0.356     | 0.11      | 0.764  | 0.263     | 0.461  |
| A002858_01 |    | -0.912    | -0.598   | 0.035     | 0.195     | -0.086    | -0.052 | 0.063     | 0.208  |
| A002863_01 |    | -0.312    | 0.096    | 0.467     | 0.351     | 0.3       | 0.351  | 0.043     | -0.008 |
| A002866_01 |    | 0.669     | 0.494    | -0.265 NA |           | -0.221 NA |        | -0.412 NA |        |
| A002869_01 |    | -0.357    | 0.077    | -0.436    | -0.193    | 0.041     | 0.174  | 0.421     | 0.62   |
| A002871_01 |    | 0.306     | 0.15     | 0.647     | 0.547     | 0.159     | -0.042 | -0.019    | -0.086 |
| A002875_01 | NA | NA        |          | -0.222 NA |           | -0.124 NA |        | 0.276     | 0.321  |
| A002881_01 | NA | NA        |          | -0.162 NA | NA        | NA        | NA     | NA        |        |
| A002895_01 |    | 0.513     | 0.286    | -0.097    | -0.013    | -0.249    | -0.389 | -0.207    | -0.192 |
| A002896_01 |    | 0.5       | 0.4      | -0.107    | 0.056     | 0.4       | 0.327  | 0.181     | 0.46   |
| A002898_01 | NA | NA        |          | 0.47      | 0.477     | 0.573     | 0.614  | 0.434     | 0.456  |
| A002901_01 | NA | NA        |          | 0.098     | 0.039 NA  | NA        |        | -0.006    | -0.045 |
| A002902_01 |    | 0.02      | 0.269    | 0.01      | 0.14      | 0.418     | 0.402  | 0.113     | 0.268  |
| A002904_01 |    | -0.89     | -0.326   | 0.59      | 0.502     | -0.015    | -0.003 | 0.104     | 0.014  |
| A002907_01 |    | 0.126     | -0.117   | 0.057     | -0.001    | -0.954    | -0.708 | -0.272    | -0.413 |
| A002908_01 |    | 0.32      | 0.053    | -0.298    | -0.145    | -0.163    | -0.18  | -0.17     | -0.13  |
| A002916_01 | NA | NA        |          | 0.262     | 0.312     | -0.211    | 0.181  | 0.055     | 0.248  |
| A002917_01 |    | -0.481    | -0.593   | -0.666    | -0.241    | -0.413    | -0.359 | 0.052     | 0.067  |
| A002919_01 |    | -0.144    | 0.141    | 0.165     | 0.327     | 0.021     | 0.223  | -0.343    | -0.16  |
| A002922_01 |    | 0.398     | 0.503    | 0.322     | 0.292     | 0.94      | 0.898  | 0.555     | 0.697  |
| A002923_01 |    | 0.024     | 0.411    | 0.228     | 0.365     | -0.074    | 0.675  | -0.113    | 0.303  |
| A002934_01 | NA | NA        |          | 0.368     | 0.354     | -0.109 NA |        | 0.339     | 0.224  |
| A002939_01 |    | -0.483    | 0.223    | 0.22      | 0.315     | 0.065 NA  |        | 0.046     | -0.044 |
| A002940_01 |    | -0.207    | -0.163   | 0.188     | 0.153     | -1.291    | -1.142 | -0.54     | -0.704 |
| A002946_01 |    | -0.293    | -0.427   | -0.41     | -0.46     | -0.318    | -0.325 | -0.228    | -0.544 |
| A002950_01 |    | 0.705     | 0.637    | 0.405     | 0.376     | 0.485     | 0.64   | 0.296     | 0.395  |
| A002952_01 |    | 0.123     | 0.215    | -0.806    | -0.691    | -0.435    | -0.401 | -0.365    | -0.399 |
| A002955_01 | NA | NA        |          | 0.039     | 0.036     | -0.482 NA |        | -0.198    | -0.382 |
| A002958_01 | NA | NA        |          | -0.404    | -0.135 NA | NA        |        | 0.201     | -0.069 |
| A002977_01 |    | 0.096     | -0.02    | 0.071     | -0.024    | -0.074    | -0.155 | -0.034    | -0.044 |
| A002982_01 |    | -0.597 NA |          | 0.46      | 0.154     | -0.191 NA |        | 0.265     | -0.011 |
| A002988_01 |    | 0.97      | 0.734 NA | NA        |           | -0.51     | -0.243 | -0.081 NA |        |
| A002991_01 |    | 0.348     | -0.067   | -0.518    | -0.41     | 0.305     | 0.135  | -0.104    | -0.004 |
| A002993_01 |    | -0.562    | -0.169   | 0         | 0.107     | -0.137    | -0.125 | -0.201    | -0.055 |
| A002997_01 |    | 0.819     | 0.726    | 0.15      | 0.256     | 0.265     | 0.564  | 0.226     | 0.401  |
| A002998_01 |    | -0.252    | 0.067    | 0.309     | 0.309     | -0.182 NA |        | -0.067    | -0.06  |
| A002999_01 |    | -0.223    | -0.684   | -2.004    | -1.605    | -1.095    | -1.131 | -0.614    | -0.55  |
| A003001_01 |    | -0.731 NA |          | 0.187     | 0.169     | 0.147     | 0.189  | 0.05      | 0.073  |
| A003003_01 |    | 0.651     | 0.451    | -0.079    | 0.092     | -0.046    | 0.218  | 0.128     | 0.198  |
| A003004_01 |    | 0.71      | 0.77     | 0.05      | 0.14      | 0.471     | 0.73   | 0.449     | 0.518  |
| A003006_01 |    | -0.61     | -0.534   | -0.011    | -0.027    | -0.859    | -0.742 | -0.277    | -0.5   |
| A003011_01 |    | 0.646     | 0.338    | -0.029    | 0.252     | -0.03     | 0.164  | -0.161    | 0.056  |
| A003012_01 |    | 0.238 NA  |          | 0.499     | 0.455     | 0.238 NA  |        | 0.378     | 0.258  |
| A003016_01 |    | 1.073     | 0.781    | 0.291     | 0.296     | 0.309     | 0.406  | 0.08      | 0.348  |
| A003018_01 |    | 1.224     | 0.937    | 0.336     | 0.568     | 1.539     | 1.365  | 0.814     | 1.126  |
| A003023_01 |    | -0.297    | 0.03     | -0.016    | 0.125     | -0.016    | 0.027  | 0.249     | 0.287  |
| A003024_01 |    | -0.311    | -0.089   | -1.342    | -0.962    | -0.258    | -0.004 | -0.073    | 0.18   |
| A003029_01 |    | -0.026    | 0.004    | -0.178    | 0.109     | -0.067    | 0.11   | -0.283    | 0.136  |
| A003034_01 | NA | NA        |          | -0.679    | -0.209    | -0.284 NA |        | 0.163     | 0.463  |
| A003036_01 |    | -1.007    | -0.335   | -0.065    | 0.262     | -1.165    | -0.64  | -0.445    | -0.219 |
| A003037_01 | NA | NA        |          | 0.525     | 0.457 NA  | NA        |        | 0.116     | 0.15   |
| A003039_01 | NA | NA        |          | -0.424    | -0.248    | -0.788 NA |        | -0.349    | -0.241 |
| A003042_01 |    | 0.198     | -0.059   | -0.284    | -0.28     | -0.126    | -0.018 | -0.168    | 0.121  |
| A003045_01 |    | -1.024    | -0.438   | -0.089    | -0.022    | -0.66     | -0.312 | -0.426    | -0.248 |
| A003050_01 | NA |           | 0.344    | 0.04      | 0.048 NA  | NA        | NA     |           | -0.101 |

|            |    |        |        |        |        |        |        |        |        |
|------------|----|--------|--------|--------|--------|--------|--------|--------|--------|
| A003054_01 |    | 0.423  | 0.171  | -0.079 | 0.118  | 0.103  | 0.073  | -0.199 | 0.034  |
| A003055_01 |    | 0.52   | 0.283  | 0.085  | 0.018  | -0.149 | -0.211 | -0.021 | -0.084 |
| A003056_01 |    | 0.019  | -0.062 | 0.207  | 0.057  | -0.397 | -0.374 | -0.214 | -0.314 |
| A003058_01 |    | -0.285 | 0.079  | -0.004 | 0.048  | -0.253 | -0.029 | 0.256  | 0.28   |
| A003059_01 |    | 0.467  | 0.684  | -0.15  | -0.104 | -0.122 | 0.056  | 0.079  | 0.396  |
| A003060_01 |    | 0.059  | 0.664  | -0.958 | -0.65  | -0.307 | NA     | -0.828 | -0.784 |
| A003070_01 |    | 1.081  | 0.615  | -0.562 | NA     | -0.294 | -0.363 | 0.779  | 0.936  |
| A003078_01 |    | 0.061  | -0.236 | -0.427 | 0.165  | -0.3   | -0.441 | -0.485 | 0.218  |
| A003079_01 |    | 0.124  | 0.203  | -0.24  | -0.019 | -0.068 | -0.113 | -0.045 | 0.075  |
| A003084_01 |    | -0.263 | -0.321 | 0.24   | 0.268  | 0.569  | 0.581  | 0.32   | 0.386  |
| A003092_01 | NA |        | NA     | 0.11   | 0.091  | 1.049  | 1.106  | 0.81   | 0.772  |
| A003101_01 |    | 0.306  | 0.412  | -0.223 | -0.142 | -0.57  | -0.462 | -0.705 | -0.616 |
| A003106_01 |    | -0.265 | 0.018  | -0.386 | -0.161 | -0.114 | 0.052  | -0.376 | -0.093 |
| A003107_01 |    | -0.223 | -0.001 | -0.62  | -0.559 | -0.729 | -0.53  | -0.796 | -0.846 |
| A003109_01 |    | -0.845 | -0.425 | -0.429 | -0.278 | -0.743 | -0.432 | -0.146 | -0.231 |
| A003110_01 |    | -0.545 | -0.094 | -0.248 | -0.153 | 0.149  | 0.432  | 0.484  | 0.668  |
| A003112_01 |    | 0.328  | 0.46   | 0.015  | 0.216  | 0.441  | 0.472  | 0.023  | 0.231  |
| A003113_01 | NA |        | 0.31   | 0.074  | NA     |        | 0.086  | 0.018  | 0.102  |
| A003114_01 |    | -0.495 | -0.204 | -0.2   | -0.116 | 0.35   | 0.143  | 0.04   | -0.012 |
| A003117_01 |    | 0.594  | 0.583  | 0.106  | 0.051  | 0.169  | 0.191  | 0.347  | 0.265  |
| A003121_01 |    | 0.076  | 0.131  | 0.112  | 0.029  | 0.097  | 0.119  | 0.452  | 0.265  |
| A003124_01 | NA |        | NA     | -0.336 | NA     |        | 0.619  | 1.044  | 0.676  |
| A003130_01 | NA |        | NA     | 0.191  | 0.174  | -0.434 | NA     | 0.024  | 0.1    |
| A003131_01 | NA |        | NA     | 0.257  | 0.334  | NA     | NA     | 0.073  | 0.221  |
| A003134_01 |    | 0.614  | 0.544  | 0.202  | 0.195  | 0.287  | 0.368  | 0.158  | 0.304  |
| A003137_01 |    | 0.394  | 0.309  | -0.22  | -0.022 | 0.061  | 0.152  | 0.088  | 0.326  |
| A003138_01 |    | -1.792 | -1.386 | -0.727 | -0.603 | -1.269 | -0.886 | -0.675 | -0.722 |
| A003141_01 |    | 0.781  | 0.833  | 0.256  | 0.308  | 0.704  | 0.595  | 0.414  | 0.601  |
| A003148_01 |    | 0.257  | 0.328  | 0.143  | 0.261  | 0.597  | 0.458  | 0.84   | 0.827  |
| A003154_01 |    | -1.332 | -0.865 | -1.241 | -0.819 | -1.219 | -1.048 | -1.068 | -1.093 |
| A003164_01 | NA |        | 0.358  | 0.089  | 0.095  | NA     | NA     | NA     | NA     |
| A003170_01 |    | 0.596  | 0.567  | -0.306 | NA     | 0.055  | NA     | NA     | NA     |
| A003174_01 |    | -0.292 | -0.27  | 0.565  | 0.462  | -0.393 | -0.312 | 0.104  | 0.11   |
| A003181_01 |    | -0.434 | NA     | -0.385 | -0.259 | -0.647 | NA     | NA     | NA     |
| A003184_01 |    | -0.976 | -0.611 | 0.016  | -0.008 | -0.665 | -0.332 | -0.162 | -0.228 |
| A003186_01 | NA |        | NA     | 0.061  | -0.03  | NA     | NA     | NA     | 0.085  |
| A003189_01 | NA |        | 0.253  | -0.325 | -0.128 | -0.452 | -0.523 | -0.487 | -0.411 |
| A003190_01 |    | -0.281 | -0.14  | -0.304 | -0.151 | -0.805 | -0.58  | -0.469 | -0.462 |
| A003194_01 |    | 0.651  | 0.299  | -0.187 | 0.103  | NA     | NA     | NA     | 0.074  |
| A003197_01 |    | -0.26  | -0.219 | -0.136 | -0.04  | -0.496 | -0.383 | -0.165 | -0.162 |
| A003198_01 |    | -0.25  | -0.095 | 0.304  | 0.272  | -0.025 | 0.074  | -0.177 | -0.169 |
| A003199_01 |    | -0.36  | -0.377 | 0.313  | 0.048  | -0.21  | -0.319 | -0.234 | -0.449 |
| A003207_01 |    | -0.082 | 0.264  | -1.248 | -0.913 | 0.987  | 1.004  | 1.376  | 1.575  |
| A003208_01 |    | -0.312 | -0.13  | -0.01  | 0.013  | -0.355 | -0.104 | 0.004  | 0.008  |
| A003209_01 | NA |        | NA     | -0.116 | 0.061  | NA     | NA     | NA     | NA     |
| A003213_01 | NA |        | NA     | -0.132 | NA     | NA     | NA     | NA     | NA     |
| A003214_01 |    | 0.01   | 0.06   | -0.375 | -0.276 | -0.117 | -0.163 | -0.321 | -0.31  |
| A003217_01 |    | -0.221 | -0.095 | 0.067  | 0.069  | -0.321 | -0.161 | -0.024 | -0.139 |
| A003222_01 | NA |        | NA     |        | -1.206 | NA     | NA     | NA     | NA     |
| A003235_01 |    | -0.999 | -0.687 | 0.023  | 0.058  | -0.016 | NA     | -0.042 | -0.147 |
| A003237_01 |    | 0.504  | NA     | -1.293 | -0.889 | NA     | NA     | -0.733 | -0.692 |
| A003242_01 |    | 0.064  | 0.173  | 0.572  | 0.446  | 1.076  | 0.765  | 0.753  | 0.74   |
| A003245_01 |    | 0.185  | 0.163  | 0.288  | 0.277  | -0.575 | -0.443 | -0.259 | -0.309 |
| A003250_01 |    | -0.729 | -0.586 | -1.123 | -1.015 | -0.807 | -0.712 | -0.552 | -0.568 |
| A003252_01 |    | 0.56   | 0.243  | 0.148  | 0.126  | 0.396  | 0.234  | 0.312  | 0.305  |
| A003263_01 |    | 0.335  | 0.073  | -0.524 | -0.266 | -0.16  | -0.326 | -0.253 | -0.29  |
| A003264_01 |    | -0.251 | -0.219 | 0.028  | 0.091  | -0.757 | -0.518 | -0.125 | -0.25  |
| A003266_01 |    | -0.27  | -0.009 | 0.396  | 0.279  | 0.615  | 0.389  | 0.681  | 0.51   |
| A003274_01 |    | 0.204  | -0.018 | -0.115 | 0.001  | -0.753 | -0.7   | -0.275 | -0.21  |
| A003276_01 |    | -1.548 | -0.923 | -0.264 | -0.208 | -1.323 | -0.911 | -0.44  | -0.53  |
| A003277_01 |    | 0.303  | -0.005 | 0.227  | 0.066  | -0.13  | NA     | 0.009  | -0.307 |
| A003278_01 |    | -0.348 | -0.114 | 0.341  | 0.343  | -0.125 | -0.067 | -0.541 | -0.64  |
| A003280_01 |    | -0.85  | NA     | 0.081  | 0.204  | -0.275 | NA     | NA     | NA     |
| A003286_01 |    | 0.716  | NA     | 0.446  | 0.266  | NA     | NA     | 0.212  | -0.059 |
| A003287_01 |    | -0.082 | -0.012 | 0.204  | 0.222  | 0.115  | 0.171  | 0.052  | 0.106  |
| A003291_01 | NA |        | -1.497 | 0.047  | 0.034  | -1.004 | -0.779 | -0.802 | -0.845 |
| A003294_01 |    | -0.862 | -0.715 | -1.096 | -0.814 | -0.851 | -0.612 | -0.542 | -0.581 |
| A003299_01 |    | -0.353 | 0.109  | 0.211  | 0.299  | -0.086 | 0.093  | 0.091  | 0.16   |



|            |    |        |        |        |        |        |        |        |        |
|------------|----|--------|--------|--------|--------|--------|--------|--------|--------|
| A003304_01 | NA | NA     |        | 0.552  | 0.468  | NA     | NA     | 0.267  | 0.146  |
| A003311_01 | NA | NA     |        | 0.054  | 0.001  |        | -0.393 | NA     | -0.47  |
| A003317_01 | NA | NA     | NA     | NA     |        |        | -0.213 | NA     | 0.539  |
| A003329_01 |    | -0.04  | 0.275  | 0.384  | 0.421  | 0.596  | 0.691  | 0.362  | 0.543  |
| A003333_01 |    | 0.646  | 0.242  | 0.241  | 0.222  | -0.028 | 0.104  | 0.258  | 0.368  |
| A003337_01 |    | 0.573  | 0.944  | 0.116  | 0.246  | -0.353 | -0.342 | -0.521 | -0.459 |
| A003339_01 |    | -0.377 | -0.267 | -0.06  | -0.173 | -0.235 | -0.245 | -0.191 | -0.241 |
| A003351_01 |    | -0.706 | -0.194 | -0.005 | 0.081  | 0.442  | 0.578  | 0.409  | 0.483  |
| A003354_01 |    | -1.117 | -0.957 | 0.273  | 0.18   | -0.771 | -0.735 | -0.432 | -0.48  |
| A003359_01 | NA |        | -0.932 | -0.486 | -0.096 | NA     | NA     | NA     | NA     |
| A003360_01 |    | -1.925 | -1.382 | -0.694 | -0.582 | -1.29  | -1.366 | -1.01  | -0.884 |
| A003365_01 |    | 0.749  | 0.508  | -0.194 | -0.128 | 0.643  | 0.689  | 0.215  | 0.333  |
| A003366_01 |    | -0.353 | -0.178 | -0.069 | -0.01  | 0.055  | NA     | -0.147 | -0.106 |
| A003367_01 |    | -0.36  | -0.056 | -0.29  | -0.178 | -0.007 | -0.044 | -0.093 | -0.178 |
| A003370_01 |    | 0.085  | 0.217  | -0.054 | -0.024 | 0.126  | 0.194  | 0.135  | 0.05   |
| A003371_01 |    | 0.001  | 0.111  | -0.245 | -0.139 | -0.449 | -0.284 | -0.405 | -0.171 |
| A003373_01 | NA | NA     |        | 0.514  | 0.431  | 0.096  | 0.22   | 0.029  | 0.103  |
| A003377_01 |    | 0.368  | 0.3    | -0.341 | -0.12  | 0.456  | 0.594  | 0.165  | 0.354  |
| A003381_01 |    | 0.611  | NA     | 0.108  | 0.124  | 0.479  | 0.702  | NA     | NA     |
| A003382_01 |    | -0.052 | 0.13   | 0.133  | 0.217  | 0.412  | 0.283  | 0.198  | 0.338  |
| A003383_01 |    | -0.268 | -0.031 | -0.132 | 0.043  | -0.594 | -0.369 | -0.305 | -0.19  |
| A003385_01 |    | -0.563 | NA     | -1.019 | -1.015 | 0.491  | 0.397  | -0.238 | -0.446 |
| A003387_01 |    | -0.258 | 0.006  | 0.182  | 0.068  | -0.199 | -0.106 | -0.065 | -0.08  |
| A003388_01 |    | -0.084 | 0.004  | 0.016  | -0.043 | 0.133  | 0.037  | 0.237  | 0.071  |
| A003389_01 |    | -2.314 | -2.401 | -1.016 | -0.806 | -2.391 | -1.958 | -0.959 | -0.927 |
| A003393_01 |    | 0.289  | 0.141  | 0.072  | 0.01   | 0.233  | 0.457  | 0.312  | 0.475  |
| A003394_01 |    | -0.339 | -0.158 | -0.028 | 0.016  | 0.199  | 0.224  | 0.077  | 0.031  |
| A003395_01 |    | -0.234 | 0.234  | -0.261 | -0.102 | -0.293 | -0.156 | -0.268 | -0.2   |
| A003398_01 |    | 0.058  | 0.006  | 0.228  | 0.113  | 0.248  | 0.335  | 0.15   | 0.133  |
| A003404_01 | NA | NA     |        | 0.582  | 0.391  | NA     | NA     | -0.207 | -0.5   |
| A003405_01 | NA | NA     |        | -0.101 | 0.096  | NA     | NA     | -0.154 | 0.007  |
| A003406_01 |    | -0.213 | 0.009  | -0.155 | -0.193 | -0.154 | -0.113 | -0.171 | -0.413 |
| A003408_01 |    | 0.152  | 0.43   | -0.243 | NA     | 0.566  | 0.537  | NA     | 0.405  |
| A003409_01 |    | -0.271 | -0.488 | -0.086 | -0.103 | -0.301 | -0.615 | -0.517 | -0.463 |
| A003410_01 |    | -0.49  | -0.013 | -0.112 | 0.026  | 0.328  | 0.272  | 0.41   | 0.355  |
| A003411_01 |    | -0.49  | -0.532 | -0.548 | -0.491 | -0.848 | -0.622 | -0.375 | -0.254 |
| A003412_01 |    | -1.07  | -0.742 | -0.734 | -0.698 | -1.293 | -0.446 | -0.271 | -0.408 |
| A003418_01 |    | 1.062  | 0.871  | 0.125  | 0.079  | 0.166  | 0.485  | 0.225  | 0.283  |
| A003419_01 |    | 0.745  | 0.612  | 0.095  | 0.174  | 0.248  | 0.324  | 0.181  | 0.308  |
| A003423_01 |    | 1.489  | 1.246  | 0.086  | 0.224  | -0.33  | -0.609 | -0.829 | -0.724 |
| A003425_01 |    | -0.512 | -0.422 | 0.222  | 0.156  | 0.206  | 0.358  | 0.2    | 0.039  |
| A003428_01 |    | 1.177  | 1.023  | 0.151  | NA     | 0.521  | 0.525  | NA     | NA     |
| A003431_01 |    | -0.002 | 0.329  | 1.075  | 0.779  | 0.145  | 0.126  | -0.288 | -0.378 |
| A003433_01 |    | 0.157  | 0.211  | 0.059  | 0.18   | -0.083 | 0.035  | 0.11   | 0.379  |
| A003434_01 |    | 0.465  | 0.587  | 0.568  | 0.444  | 0.544  | 0.463  | 0.39   | 0.407  |
| A003440_01 |    | -0.129 | -0.172 | 0.156  | 0.114  | 0.102  | 0.078  | -0.034 | -0.035 |
| A003443_01 | NA | NA     |        | 0.266  | 0.337  | NA     | NA     | 0.144  | 0.282  |
| A003444_01 | NA | NA     |        | 0.269  | 0.187  | 0.077  | NA     | -0.091 | -0.007 |
| A003446_01 |    | 0.183  | 0.234  | -0.491 | -0.343 | 0.009  | 0.196  | 0.392  | 0.553  |
| A003448_01 | NA | NA     |        | 0.53   | 0.211  | NA     | NA     | -0.084 | -0.34  |
| A003456_01 | NA | NA     |        | 0.222  | 0.192  | NA     | NA     | 0.155  | 0.12   |
| A003458_01 |    | 0.413  | 0.412  | -0.317 | -0.11  | 0.407  | 0.367  | 0.368  | 0.525  |
| A003460_01 |    | -0.961 | -0.709 | 0.045  | 0.003  | -0.398 | -0.256 | 0.049  | -0.06  |
| A003465_01 |    | 0.286  | NA     | 0.155  | 0.333  | 0.089  | NA     | NA     | NA     |
| A003467_01 |    | 0.143  | NA     | -0.26  | NA     | -0.435 | NA     | NA     | NA     |
| A003468_01 |    | -0.337 | 0.069  | 0.125  | 0.122  | 0.335  | 0.305  | 0.379  | 0.385  |
| A003470_01 |    | 0.317  | 0.169  | 0.134  | 0.26   | 0.238  | 0.285  | -0.055 | 0.033  |
| A003471_01 |    | 0.556  | 0.281  | -0.117 | NA     | NA     | -0.016 | NA     | NA     |
| A003472_01 |    | -0.09  | -0.157 | -0.167 | -0.027 | -0.007 | -0.03  | NA     | 0.026  |
| A003475_01 |    | -0.909 | -0.221 | 0.339  | 0.454  | 0.383  | 0.682  | 0.181  | 0.323  |
| A003478_01 |    | -0.404 | 0.059  | 0.046  | 0.282  | 0.008  | 0.293  | 0.149  | 0.215  |
| A003480_01 |    | 0.017  | NA     | -0.881 | -0.269 | -0.069 | NA     | -0.09  | 0.025  |
| A003483_01 |    | -0.272 | -0.02  | -0.547 | -0.292 | 0.111  | 0.206  | 0.498  | 0.478  |
| A003486_01 |    | -0.382 | NA     | -0.528 | -0.219 | -0.543 | -0.625 | -0.533 | -0.546 |
| A003488_01 |    | -0.316 | -0.042 | 0.198  | 0.256  | 0.036  | 0.095  | -0.071 | 0.073  |
| A003493_01 | NA |        | 0.082  | 0.181  | 0.195  | 0.289  | 0.123  | -0.062 | -0.018 |
| A003497_01 |    | 0.127  | 0.227  | 0.218  | 0.266  | 0.432  | 0.58   | 0.284  | 0.418  |
| A003500_01 |    | 0.255  | 0.109  | -0.657 | -0.341 | -0.169 | -0.105 | -0.368 | -0.353 |

|            |    |        |        |        |        |        |        |        |        |
|------------|----|--------|--------|--------|--------|--------|--------|--------|--------|
| A003501_01 |    | -0.31  | -0.038 | -0.189 | -0.09  | -0.022 | -0.02  | -0.29  | -0.102 |
| A003503_01 |    | 0.654  | 0.641  | 0.314  | 0.303  | 0.514  | 0.382  | 0.253  | 0.19   |
| A003510_01 |    | -0.812 | -0.55  | 0.089  | 0.048  | -0.502 | -0.122 | 0.032  | -0.139 |
| A003512_01 |    | -1.105 | -0.68  | 0.104  | 0.175  | -0.68  | -0.316 | -0.088 | 0.093  |
| A003513_01 |    | -0.147 | 0.103  | -0.703 | -0.43  | -0.076 | 0.149  | 0.082  | 0.195  |
| A003518_01 |    | 0.404  | 0.374  | 0.022  | -0.065 | 0.362  | 0.247  | 0.223  | 0.236  |
| A003522_01 | NA |        | NA     | 0.2    | 0.159  | NA     | NA     | NA     | NA     |
| A003523_01 |    | -0.312 | -0.394 | -0.792 | -0.433 | -0.567 | -0.364 | -0.4   | -0.137 |
| A003528_01 |    | 0.53   | 0.435  | 0.238  | 0.192  | 0.468  | 0.351  | 0.356  | 0.36   |
| A003530_01 |    | 0.638  | 0.593  | 0.04   | 0.137  | 0.674  | 0.657  | 0.522  | 0.604  |
| A003533_01 |    | 0.41   | 0.434  | 0.247  | 0.316  | 0.451  | 0.399  | 0.154  | 0.249  |
| A003535_01 |    | 0.678  | 0.329  | -0.745 | -0.451 | -0.128 | -0.334 | 0.094  | 0.103  |
| A003536_01 |    | -0.592 | -0.324 | 0.274  | 0.396  | 0.336  | 0.642  | 0.526  | 0.683  |
| A003537_01 |    | 0.392  | 0.489  | 0.447  | 0.499  | 0.403  | 0.543  | 0.163  | 0.429  |
| A003538_01 |    | 0.071  | 0.127  | 0.16   | 0.18   | 0.309  | 0.221  | -0.039 | -0.095 |
| A003540_01 |    | -0.281 | 0.015  | 0.268  | 0.46   | 0.41   | 0.652  | 0.694  | 0.951  |
| A003544_01 | NA |        | NA     | 0.256  | 0.238  | NA     | NA     | -0.054 | -0.179 |
| A003547_01 | NA |        |        | -0.738 | -0.463 | -0.312 | NA     | -0.89  | -0.629 |
| A003553_01 |    | -0.465 | -0.059 | 0.214  | 0.255  | 0.188  | 0.468  | 0.076  | 0.201  |
| A003554_01 |    | 0.025  | -0.22  | -0.271 | -0.228 | -0.412 | -0.361 | -0.193 | -0.243 |
| A003555_01 |    | -1.174 | -0.679 | 0.541  | 0.636  | -1.256 | -0.821 | -0.62  | -0.427 |
| A003556_01 |    | 0.46   | 0.392  | -0.017 | -0.035 | 0.138  | 0.217  | -0.006 | 0.033  |
| A003560_01 | NA |        | NA     | 0.37   | 0.346  | NA     | NA     | 0.301  | 0.243  |
| A003567_01 | NA |        |        | -1.214 | -0.965 | -0.442 | NA     | -0.709 | -0.552 |
| A003574_01 |    | 0.178  | -0.058 | 0.223  | 0.17   | 0.008  | NA     | NA     | 0.15   |
| A003576_01 |    | 0.063  | 0.324  | -0.408 | -0.394 | 1.25   | 0.943  | 1.333  | 1.448  |
| A003588_01 |    | -0.009 | -0.102 | -0.319 | -0.207 | -0.866 | -0.615 | -0.41  | -0.218 |
| A003599_01 |    | 0.361  | 0.322  | -0.325 | NA     | 0.199  | 0.159  | 0.374  | 0.35   |
| A003604_01 |    | -0.313 | -0.092 | 0.213  | 0.274  | 0.179  | 0.43   | 0.236  | 0.292  |
| A003606_01 |    | 0.627  | 0.574  | 0.273  | 0.211  | 0.467  | 0.405  | 0.322  | 0.29   |
| A003607_01 | NA |        | NA     | 0.004  | -0.042 | NA     | NA     | 0.09   | -0.077 |
| A003608_01 |    | 0.601  | 0.365  | -0.118 | 0.078  | 0.059  | 0.099  | -0.06  | 0.168  |
| A003610_01 |    | 0.096  | -0.054 | 0.146  | 0.278  | -0.517 | -0.28  | -0.426 | -0.234 |
| A003614_01 |    | -0.496 | -0.352 | 0.699  | 0.544  | 0.263  | 0.44   | 0.229  | 0.315  |
| A003617_01 |    | -0.088 | NA     | -0.551 | -0.402 | -0.721 | NA     | -0.578 | NA     |
| A003621_01 |    | 0.114  | 0.157  | -0.166 | NA     | -0.125 | NA     | NA     | 0.023  |
| A003628_01 | NA |        | NA     | 0.119  | 0.259  | NA     | NA     | -0.069 | 0.039  |
| A003630_01 | NA |        | NA     | -0.14  | NA     | NA     | NA     | -0.338 | NA     |
| A003633_01 |    | 0.499  | 0.669  | 0.436  | 0.329  | 0.132  | 0.323  | 0.288  | 0.237  |
| A003636_01 | NA |        | NA     | 0.638  | 0.613  | NA     | NA     | -0.127 | -0.194 |
| A003637_01 |    | -0.786 | -1.241 | -1.339 | -1.032 | -1.634 | -1.618 | -1.317 | -1.291 |
| A003641_01 |    | 0.849  | 0.744  | -0.256 | 0.006  | -0.628 | -0.43  | -0.587 | -0.12  |
| A003643_01 | NA |        | NA     | 0.406  | 0.199  | NA     | NA     | 0.01   | -0.031 |
| A003647_01 |    | -2.061 | NA     | NA     | NA     | NA     | -1.697 | -2.036 | NA     |
| A003648_01 | NA |        | NA     | 0.228  | 0.295  | NA     | NA     | -0.081 | -0.009 |
| A003653_01 |    | 0.285  | 0.035  | -0.525 | -0.342 | -0.413 | -0.451 | -0.433 | -0.11  |
| A003655_01 |    | 0.335  | 0.049  | 0.198  | 0.197  | -0.23  | -0.045 | 0.008  | -0.038 |
| A003656_01 |    | -1.002 | -0.937 | -0.02  | -0.056 | -0.786 | -0.726 | -0.349 | -0.539 |
| A003657_01 |    | -0.342 | 0.13   | -0.005 | NA     | 0.124  | NA     | NA     | 0.093  |
| A003660_01 |    | -1.039 | -0.989 | -0.758 | -0.523 | -1.306 | -0.808 | -1.091 | -0.884 |
| A003664_01 |    | 0.581  | 0.296  | 0.329  | 0.215  | 0.373  | 0.176  | 0.177  | 0.153  |
| A003665_01 |    | -0.276 | -0.041 | 0.012  | 0.042  | 0.094  | 0.273  | 0.024  | 0.041  |
| A003667_01 |    | 0.26   | NA     | 0.278  | 0.27   | -0.219 | NA     | NA     | NA     |
| A003668_01 |    | -0.254 | 0.205  | 0.095  | 0.142  | -0.021 | 0.281  | 0.19   | 0.208  |
| A003671_01 | NA |        | NA     | 0.45   | 0.439  | -0.279 | NA     | -0.13  | -0.149 |
| A003672_01 |    | -0.114 | 0.178  | -0.511 | -0.313 | -0.301 | 0.153  | -0.162 | 0.059  |
| A003673_01 |    | -0.321 | NA     | -0.385 | -0.17  | -0.726 | -0.574 | -0.109 | -0.116 |
| A003675_01 |    | -0.854 | -0.483 | 0.4    | 0.334  | -0.253 | NA     | -0.323 | -0.409 |
| A003676_01 | NA |        | NA     | -0.202 | -0.048 | NA     | NA     | -0.26  | NA     |
| A003678_01 |    | 0.067  | 0.144  | -0.099 | -0.08  | 0.124  | 0.157  | 0.386  | 0.325  |
| A003679_01 |    | -1.127 | -0.719 | -0.23  | -0.217 | -0.263 | -0.329 | -0.175 | -0.237 |
| A003681_01 |    | 0.568  | 0.52   | 0.006  | 0.18   | -0.011 | 0.189  | -0.099 | 0.009  |
| A003689_01 |    | -0.455 | -0.336 | -0.076 | -0.035 | -0.321 | -0.35  | 0.05   | -0.004 |
| A003690_01 | NA |        | NA     | -0.357 | NA     | NA     | NA     | NA     | NA     |
| A003691_01 |    | 1.055  | 0.779  | 0.189  | 0.411  | 0.734  | 0.882  | 0.685  | 0.814  |
| A003694_01 |    | -0.52  | -0.787 | -0.756 | -0.487 | -0.937 | -0.906 | -0.579 | -0.611 |
| A003695_01 | NA |        | NA     | 0.688  | 0.601  | NA     | NA     | -0.657 | -0.721 |
| A003696_01 |    | 0.679  | 0.576  | 0.168  | 0.162  | 0.392  | 0.46   | 0.119  | 0.202  |

|            |        |        |        |        |        |        |        |        |  |
|------------|--------|--------|--------|--------|--------|--------|--------|--------|--|
| A003698_01 | -0.617 | NA     | -0.544 | -0.496 | -0.841 | NA     | -0.671 | NA     |  |
| A003703_01 | 0.947  | 0.697  | 0.343  | 0.256  | 0.309  | 0.319  | 0.228  | 0.233  |  |
| A003706_01 | 0.28   | 0.42   | 0.156  | NA     | 0.376  | 0.475  | 0.405  | 0.4    |  |
| A003710_01 | 0      | 0.049  | 0.088  | 0.116  | 0.183  | 0.095  | 0.093  | 0.107  |  |
| A003714_01 | NA     | NA     | 0.49   | 0.477  | NA     | NA     | 0.062  | -0.071 |  |
| A003716_01 | NA     | NA     | -1.282 | NA     | NA     | NA     | NA     | NA     |  |
| A003719_01 | NA     | NA     | 0.523  | 0.511  | 0.28   | 0.48   | 0.02   | 0.162  |  |
| A003720_01 | 0.469  | 0.472  | 0.314  | 0.142  | 0.568  | 0.48   | 0.289  | 0.002  |  |
| A003732_01 | NA     | NA     | -0.005 | 0.085  | 0.392  | 0.414  | 0.122  | 0.313  |  |
| A003736_01 | -1.06  | NA     | -1.361 | -1.111 | NA     | NA     | -0.899 | -0.838 |  |
| A003737_01 | 1.093  | 0.772  | 0.138  | 0.161  | 0.757  | 0.714  | 0.859  | 1.086  |  |
| A003743_01 | -0.026 | 0.164  | 0.283  | 0.315  | 0.436  | 0.654  | 0.793  | 0.966  |  |
| A003744_01 | 0.037  | NA     | 0.222  | 0.153  | 0.135  | 0.182  | 0.003  | -0.005 |  |
| A003750_01 | 0.503  | 0.686  | -0.001 | 0.128  | 0.296  | 0.487  | 0.77   | 1.042  |  |
| A003753_01 | NA     | NA     | 0.195  | 0.27   | -0.229 | NA     | -0.11  | 0.031  |  |
| A003754_01 | 0.291  | 0.173  | -0.223 | -0.104 | -0.219 | -0.032 | -0.21  | 0.064  |  |
| A003755_01 | -0.77  | -0.206 | -0.089 | 0.052  | -0.063 | -0.091 | 0.237  | 0.461  |  |
| A003756_01 | NA     | NA     | -0.043 | 0.203  | NA     | NA     | NA     | 0.083  |  |
| A003762_01 | -0.415 | -0.463 | 0.427  | 0.246  | 0.083  | 0.037  | 0.339  | 0.208  |  |
| A003767_01 | 0.595  | 0.459  | -0.434 | -0.155 | 0.169  | 0.281  | 0.386  | 0.642  |  |
| A003773_01 | 0.66   | 0.385  | 0.183  | 0.212  | 0.518  | 0.318  | 0.334  | 0.274  |  |
| A003775_01 | 0.122  | 0.074  | 0.028  | 0.17   | -0.116 | 0.023  | -0.054 | -0.12  |  |
| A003789_01 | 0.197  | 0.105  | -0.214 | -0.151 | 0.089  | 0.142  | 0.468  | 0.439  |  |
| A003800_01 | NA     | NA     | 0.206  | 0.219  | NA     | NA     | -0.683 | -0.78  |  |
| A003802_01 | -0.093 | -0.124 | 0.162  | 0.2    | -0.024 | -0.135 | -0.13  | -0.239 |  |
| A003803_01 | NA     | -0.725 | -0.415 | NA     | -0.151 | 0.293  | 0.582  | 0.702  |  |
| A003804_01 | 1.313  | 1.081  | -0.095 | 0.184  | -0.575 | NA     | NA     | -0.128 |  |
| A003808_01 | -0.573 | -0.307 | -0.062 | 0.104  | -0.351 | -0.181 | -0.414 | -0.433 |  |
| A003809_01 | NA     | NA     | 0.083  | NA     | -0.252 | 0.203  | NA     | NA     |  |
| A003817_01 | -0.062 | -0.11  | -0.708 | NA     | -0.274 | 0.056  | 0.597  | 0.638  |  |
| A003820_01 | -0.015 | 0.154  | -0.134 | 0.067  | -0.028 | 0.214  | 0.197  | 0.37   |  |
| A003825_01 | -0.51  | -0.803 | -0.418 | -0.229 | -0.951 | -0.922 | -0.543 | -0.472 |  |
| A003826_01 | NA     | NA     | 0.429  | 0.336  | NA     | NA     | 0.038  | -0.128 |  |
| A003827_01 | 0.316  | 0.209  | -0.154 | 0.177  | NA     | NA     | 0.361  | 0.677  |  |
| A003829_01 | 0.866  | 0.59   | 0.006  | 0.135  | 0.435  | 0.363  | 0.169  | 0.408  |  |
| A003844_01 | -2.718 | -3.421 | -4.804 | -3.264 | -3.466 | -2.599 | -2.862 | -3.323 |  |
| A003846_01 | -0.327 | -0.182 | -0.341 | -0.129 | -0.463 | -0.232 | -0.327 | -0.133 |  |
| A003849_01 | NA     | NA     | 0.25   | 0.324  | -0.026 | NA     | 0.282  | 0.332  |  |
| A003851_01 | -0.461 | -0.163 | -1.209 | -0.853 | -0.169 | 0.295  | 0.537  | 0.628  |  |
| A003854_01 | -0.447 | -0.083 | -0.311 | 0.003  | 0.186  | 0.185  | 0.01   | -0.048 |  |
| A003860_01 | NA     | NA     | -0.483 | -0.275 | NA     | NA     | -0.473 | NA     |  |
| A003861_01 | 0.083  | 0.34   | 0.33   | 0.355  | 0.252  | 0.564  | 0.391  | 0.291  |  |
| A003863_01 | -0.156 | NA     | NA     | NA     | -0.838 | -0.785 | -0.537 | NA     |  |
| A003864_01 | NA     | NA     | 0.869  | 0.462  | 0.289  | 0.526  | 0.166  | 0.03   |  |
| A003869_01 | 0.606  | 0.569  | -0.065 | -0.029 | 0.721  | 0.818  | 0.504  | 0.591  |  |
| A003872_01 | 0.58   | 0.586  | -0.358 | -0.081 | 0.892  | 0.717  | 0.68   | 0.72   |  |
| A003875_01 | 0.572  | 0.49   | -0.356 | -0.121 | 0.18   | 0.383  | 0.127  | 0.373  |  |
| A003876_01 | 0.357  | 0.32   | 0.312  | 0.404  | 0.151  | 0.236  | NA     | 0.251  |  |
| A003885_01 | NA     | NA     | 0.251  | 0.166  | -0.461 | -0.032 | -0.401 | -0.348 |  |
| A003889_01 | -0.836 | NA     | -0.232 | -0.111 | -0.624 | NA     | -0.666 | -0.878 |  |
| A003898_01 | 0.14   | 0.342  | 0.141  | 0.161  | 0.328  | 0.192  | 0.276  | 0.21   |  |
| A003910_01 | -0.825 | NA     | 0.43   | 0.364  | -0.067 | 0.095  | 0.092  | -0.066 |  |
| A003914_01 | 0.169  | 0.273  | -0.13  | -0.018 | 0.002  | 0.102  | -0.018 | 0.033  |  |
| A003915_01 | 0.497  | 0.546  | 0.08   | 0.146  | 0.291  | 0.406  | 0.098  | 0.168  |  |
| A003921_01 | -0.309 | -0.355 | -1.109 | -0.775 | -0.71  | -0.466 | -0.549 | -0.479 |  |
| A003925_01 | -0.138 | 0.086  | -0.008 | 0.213  | 0.449  | 0.44   | 0.571  | 0.65   |  |
| A003926_01 | -0.289 | NA     | 0.136  | 0.153  | 0.129  | 0.497  | 0.08   | -0.026 |  |
| A003932_01 | 0.486  | NA     | -0.824 | -0.572 | NA     | NA     | -0.518 | -0.612 |  |
| A003933_01 | 0.327  | 0.225  | -0.045 | 0.17   | 0.406  | 0.854  | 0.729  | 1.201  |  |
| A003940_01 | NA     | NA     | 0.544  | 0.678  | NA     | NA     | NA     | NA     |  |
| A003947_01 | 0.857  | 0.406  | -0.273 | NA     | 0.377  | 0.334  | NA     | NA     |  |
| A003948_01 | -0.33  | -0.134 | -0.206 | -0.149 | NA     | NA     | -0.397 | -0.503 |  |
| A003952_01 | NA     | NA     | -0.234 | NA     | NA     | NA     | NA     | NA     |  |
| A003958_01 | NA     | 0.374  | -0.52  | -0.072 | 0.352  | 0.624  | -0.025 | NA     |  |
| A003959_01 | 0.274  | 0.154  | 0.197  | 0.318  | 0.588  | 0.619  | 0.69   | 0.911  |  |
| A003960_01 | 0.363  | 0.327  | 0.746  | 0.814  | 1.024  | 1.116  | 0.978  | 0.945  |  |
| A003961_01 | NA     | NA     | -0.137 | NA     | -0.256 | NA     | -0.116 | NA     |  |
| A003965_01 | 0.408  | 0.469  | -0.549 | -0.335 | 0.268  | 0.539  | 0.494  | 0.562  |  |

|            |        |        |        |        |        |        |        |        |
|------------|--------|--------|--------|--------|--------|--------|--------|--------|
| A003968_01 | -0.306 | -0.197 | -0.309 | -0.124 | 0.081  | 0.219  | -0.082 | -0.09  |
| A003969_01 | 0.584  | 0.469  | -0.201 | 0.033  | 0.567  | 0.865  | 0.38   | 0.701  |
| A003974_01 | NA     | NA     | 0.335  | 0.187  | 0.017  | 0.337  | 0.172  | 0.039  |
| A003979_01 | -0.862 | NA     | -0.185 | -0.114 | -0.883 | -0.593 | -0.508 | -0.571 |
| A003982_01 | 1.252  | 1.31   | 0.143  | 0.438  | -0.058 | -0.066 | -0.144 | 0.043  |
| A003984_01 | 0.225  | 0.345  | -0.027 | -0.033 | 0.327  | 0.423  | 0.233  | 0.268  |
| A003989_01 | 0.174  | 0.583  | 0.448  | 0.416  | -0.154 | 0.366  | -0.308 | 0.106  |
| A003991_01 | -0.458 | 0.008  | 0.02   | 0.17   | -0.265 | -0.226 | 0.252  | 0.253  |
| A003997_01 | 1.023  | 0.935  | 0.661  | 0.538  | 0.19   | 0.211  | 0.339  | 0.369  |
| A004000_01 | 0.767  | 0.674  | 0.322  | 0.257  | 0.605  | 0.497  | 0.433  | 0.324  |
| A004003_01 | 0.343  | 0.343  | 0.091  | 0.116  | 0.018  | NA     | NA     | 0.237  |
| A004018_01 | 0.15   | 0.423  | -0.505 | -0.431 | 0.192  | 0.225  | -0.002 | -0.143 |
| A004026_01 | -0.196 | -0.107 | -0.032 | 0.141  | -0.459 | -0.182 | -0.208 | 0.04   |
| A004038_01 | 0.79   | 0.934  | -0.176 | 0.168  | 0.473  | 0.937  | 0.535  | 1.035  |
| A004039_01 | 0.763  | 0.341  | -0.47  | -0.259 | 0.327  | 0.35   | 0.038  | 0.046  |
| A004044_01 | -0.027 | 0.048  | 0.108  | 0.363  | -0.279 | 0.134  | -0.092 | 0.211  |
| A004045_01 | 0.76   | 0.554  | 0.049  | 0.07   | 0.215  | 0.098  | 0.236  | 0.313  |
| A004048_01 | NA     | -0.877 | 0.242  | 0.188  | -0.105 | 0.148  | -0.179 | -0.134 |
| A004058_01 | -0.209 | 0.005  | 0.002  | -0.005 | 0.102  | 0.119  | 0.159  | 0.072  |
| A004098_01 | 0.042  | 0.148  | 0.025  | 0.146  | -0.098 | 0.131  | 0.252  | 0.369  |
| A004103_01 | 0.678  | 0.251  | -0.656 | NA     | -0.421 | -0.171 | -0.181 | 0.266  |
| A004107_01 | -0.368 | -0.18  | -0.669 | -0.342 | -0.537 | NA     | -0.343 | NA     |
| A004121_01 | -0.34  | -0.155 | -0.589 | -0.433 | -0.23  | 0.113  | -0.165 | 0.051  |
| A004122_01 | 0.436  | 0.065  | -0.08  | 0.143  | 0.038  | 0.098  | -0.036 | 0.04   |
| A004144_01 | 0.03   | 0.106  | -0.099 | -0.207 | 0.23   | 0.102  | 0.234  | 0.07   |
| A004145_01 | 0.551  | 0.558  | 0.128  | 0.489  | -0.06  | 0.284  | NA     | 0.631  |
| A004150_01 | 0.313  | 0.287  | 0.021  | 0.096  | 0.197  | 0.261  | 0.289  | 0.225  |
| A004151_01 | 0.431  | 0.378  | 0.091  | 0.394  | -0.222 | 0.557  | 0.498  | 0.795  |
| A004152_01 | 0.34   | 0.204  | 0.106  | 0.149  | 0.004  | 0.212  | 0.287  | 0.552  |
| A004157_01 | -0.079 | 0.032  | -0.111 | -0.092 | 0.138  | 0.094  | 0.194  | -0.087 |
| A004165_01 | 0.368  | 0.193  | 0.484  | 0.485  | 0.931  | 0.632  | 0.251  | 0.185  |
| A004173_01 | -0.118 | 0.029  | 0.138  | 0.042  | 0.416  | 0.408  | 0.249  | 0.303  |
| A004175_01 | NA     | NA     | 0.128  | NA     | NA     | 0.647  | 0.22   | 0.561  |
| A004177_01 | NA     | NA     | 0.053  | 0.286  | NA     | NA     | -0.318 | 0.086  |
| A004181_01 | 1.112  | 1.14   | -1.199 | NA     | -0.343 | -0.324 | -0.895 | NA     |
| A004219_01 | -0.005 | -0.161 | 0.231  | 0.199  | -0.336 | -0.414 | -0.419 | -0.304 |
| A004221_01 | 0.354  | 0.402  | -0.248 | NA     | -0.394 | NA     | NA     | NA     |
| A004223_01 | NA     | NA     | 0.151  | 0.309  | 0.025  | -0.121 | -0.077 | 0.016  |
| A004225_01 | 1.083  | 1.036  | -0.342 | -0.253 | -0.404 | -0.435 | -0.675 | -0.709 |
| A004236_01 | NA     | NA     | 0.383  | 0.433  | NA     | NA     | -0.407 | -0.308 |
| A004241_01 | -0.01  | -0.058 | -0.671 | NA     | -0.219 | -0.442 | 0.011  | 0.284  |
| A004242_01 | -0.745 | -0.789 | -0.119 | 0.054  | -0.945 | -1.002 | -0.869 | -0.665 |
| A004243_01 | 0.129  | 0.348  | 0.102  | 0.048  | -0.045 | 0.043  | 0.108  | 0.08   |
| A004244_01 | -0.083 | -0.106 | 0.572  | 0.57   | 0.593  | 0.609  | 0.376  | 0.4    |
| A004253_01 | NA     | NA     | 0.299  | 0.256  | NA     | NA     | -0.24  | -0.165 |
| A004271_01 | 0.088  | 0.027  | -0.772 | -0.596 | 0.184  | -0.08  | -0.056 | -0.046 |
| A004272_01 | 0.585  | 0.657  | 0.071  | 0.06   | 0.686  | 0.755  | 0.806  | 0.828  |
| A004276_01 | -1.259 | -0.564 | 0.6    | 0.588  | -0.533 | -0.251 | -0.019 | 0.212  |
| A004281_01 | -1.089 | -0.562 | -0.661 | -0.413 | -0.424 | -0.332 | -0.451 | -0.515 |
| A004284_01 | -1.497 | NA     | -2.062 | -1.577 | -1.587 | -1.533 | -1.24  | -1.379 |
| A004285_01 | 0.852  | 0.744  | 0.121  | 0.259  | 1.205  | 1.241  | 1.244  | 1.253  |
| A004288_01 | 0.557  | 0.227  | 0.024  | 0.002  | 0.01   | -0.048 | 0.177  | -0.075 |
| A004289_01 | -0.187 | 0.481  | 0.011  | 0.162  | 0.287  | 0.507  | 0.024  | 0.179  |
| A004290_01 | 0.635  | 0.339  | 0.039  | -0.103 | 0.273  | 0.129  | 0.165  | 0.115  |
| A004300_01 | -0.724 | -0.264 | -0.32  | -0.126 | -0.34  | -0.352 | -0.258 | -0.246 |
| A004305_01 | 0.578  | 0.691  | 0.165  | 0.079  | 0.527  | 0.692  | 0.823  | 0.921  |
| A004306_01 | NA     | 0.268  | 0.207  | 0.007  | 0.464  | 0.613  | 0.409  | 0.504  |
| A004311_01 | -0.37  | NA     | 0.296  | 0.39   | 0.116  | NA     | -0.047 | 0.104  |
| A004313_01 | 0.337  | 0.507  | -0.194 | -0.164 | -0.116 | -0.233 | -0.115 | -0.294 |
| A004314_01 | 1.18   | 1.065  | 0.915  | 0.935  | 1.362  | 1.414  | 0.863  | 1.242  |
| A004319_01 | -0.368 | -0.4   | 0.122  | 0.077  | -0.377 | -0.22  | -0.106 | -0.041 |
| A004320_01 | -2.3   | -2.874 | -3.167 | -2.092 | -2.171 | -1.072 | -1.627 | -2.103 |
| A004325_01 | -0.421 | -0.355 | 0.018  | -0.075 | -0.47  | -0.352 | -0.038 | -0.1   |
| A004335_01 | NA     | NA     | -0.345 | -0.175 | -0.133 | NA     | -0.363 | -0.255 |
| A004343_01 | 0.293  | NA     | -0.125 | 0.035  | -0.053 | NA     | -0.069 | 0.043  |
| A004347_01 | -0.392 | -0.201 | 0.069  | -0.053 | -0.128 | 0.007  | 0.166  | 0.119  |
| A004349_01 | 0.329  | 0.257  | -0.108 | -0.049 | 0.144  | 0.35   | 0.135  | 0.237  |
| A004350_01 | 0.729  | 0.736  | -0.221 | -0.148 | 0.177  | 0.595  | 0.198  | 0.483  |

|            |        |        |        |        |        |        |        |        |
|------------|--------|--------|--------|--------|--------|--------|--------|--------|
| A004359_01 | -1.091 | NA     | 0.102  | 0.235  | -0.031 | NA     | 0      | 0.173  |
| A004362_01 | 0.18   | 0.018  | 0.275  | 0.302  | 0.23   | 0.079  | NA     | -0.092 |
| A004378_01 | NA     | -0.127 | -0.095 | 0.03   | 0.222  | 0.112  | -0.148 | -0.199 |
| A004382_01 | 0.395  | NA     | 0.055  | 0.136  | 0.155  | 0.202  | 0.256  | 0.301  |
| A004383_01 | -0.43  | -0.219 | -0.399 | -0.309 | -0.224 | 0.021  | -0.246 | 0.072  |
| A004386_01 | -0.653 | 0.002  | -0.027 | 0.057  | 0.08   | 0.083  | -0.113 | 0.223  |
| A004392_01 | 0.094  | NA     | 0.219  | 0.117  | 0.149  | NA     | 0.168  | 0.041  |
| A004393_01 | -0.109 | -0.065 | 0.18   | 0.248  | 0.338  | 0.129  | 0.027  | -0.082 |
| A004396_01 | -0.127 | 0.028  | -0.118 | -0.033 | 0.062  | 0.164  | 0.058  | 0.031  |
| A004397_01 | 0.615  | 0.287  | -0.042 | -0.072 | -0.046 | -0.297 | 0.043  | -0.057 |
| A004398_01 | -0.034 | 0.036  | 0.086  | -0.011 | 0.274  | 0.508  | 0.457  | 0.415  |
| A004404_01 | 0.656  | 0.74   | 0.748  | 0.775  | 0.6    | 0.827  | 0.696  | 0.849  |
| A004406_01 | NA     | NA     | 0.136  | 0.141  | 0.067  | NA     | -0.159 | NA     |
| A004407_01 | -2.249 | -1.655 | -0.159 | -0.007 | -1.184 | -0.816 | -0.076 | 0.026  |
| A004408_01 | -1.101 | -0.788 | 0.245  | 0.093  | -0.776 | -0.617 | 0.236  | 0.091  |
| A004413_01 | -0.373 | 0.046  | 0.314  | 0.375  | -0.096 | 0.155  | -0.012 | 0.066  |
| A004417_01 | 0.542  | 0.605  | -0.354 | -0.35  | 0.14   | 0.217  | 0.753  | 0.499  |
| A004424_01 | NA     | NA     | -0.631 | NA     | -0.225 | -0.183 | -0.36  | NA     |
| A004425_01 | 0.156  | 0.025  | -0.57  | -0.258 | 0.075  | 0.191  | 0.389  | 0.499  |
| A004426_01 | 0.151  | 0.341  | -0.011 | 0.004  | 0.22   | 0.372  | 0.188  | 0.173  |
| A004429_01 | 0.025  | 0.091  | 0.038  | 0      | 0.407  | 0.344  | 0.394  | 0.376  |
| A004431_01 | -0.416 | NA     | -0.824 | -0.618 | -0.923 | NA     | -0.845 | -0.789 |
| A004434_01 | -0.261 | 0.09   | -0.329 | -0.152 | -0.127 | -0.113 | -0.058 | 0.045  |
| A004437_01 | -0.041 | 0.571  | 0.301  | 0.359  | -0.243 | 0.364  | 0.224  | 0.462  |
| A004439_01 | -0.443 | -0.446 | -0.123 | -0.112 | 0.122  | -0.165 | -0.035 | -0.108 |
| A004442_01 | 1.145  | 1.135  | -0.222 | 0.271  | 0.82   | 1.396  | 0.92   | 1.722  |
| A004448_01 | -0.945 | -0.717 | -0.233 | -0.056 | -0.17  | -0.164 | -0.065 | 0.077  |
| A004449_01 | -0.333 | NA     | 0.152  | -0.079 | -0.005 | NA     | 0.208  | -0.162 |
| A004451_01 | -0.449 | -0.499 | -0.444 | -0.355 | -0.421 | -0.291 | -0.229 | -0.356 |
| A004452_01 | NA     | NA     | 0.582  | 0.4    | NA     | NA     | 0.106  | -0.111 |
| A004454_01 | -0.692 | -0.779 | -0.458 | -0.329 | -0.601 | -0.578 | -0.28  | -0.232 |
| A004456_01 | 0.478  | 0.208  | 0.271  | 0.364  | -0.349 | -0.273 | 0.087  | 0.227  |
| A004458_01 | 0.254  | 0.504  | 0.624  | 0.403  | 0.21   | 0.212  | 0.357  | 0.295  |
| A004461_01 | 0.516  | 0.302  | -0.044 | 0.119  | -0.273 | -0.18  | -0.362 | 0.003  |
| A004462_01 | 0.063  | 0.173  | 0.351  | 0.209  | 0.173  | 0.107  | -0.03  | -0.089 |
| A004464_01 | -0.308 | -0.056 | 0.093  | 0.275  | -0.256 | 0.029  | -0.29  | 0.037  |
| A004466_01 | 0.407  | NA     | -0.13  | NA     | -0.162 | NA     | -0.033 | -0.115 |
| A004467_01 | NA     | NA     | 0.107  | -0.042 | NA     | NA     | 0.006  | -0.118 |
| A004468_01 | -0.514 | -0.646 | -0.276 | -0.371 | -0.269 | -0.458 | -0.277 | -0.62  |
| A004469_01 | 0.103  | -0.16  | -0.193 | -0.211 | 0.581  | 0.374  | 0.817  | 0.748  |
| A004470_01 | 0.595  | 0.592  | -0.15  | -0.173 | 0.536  | 0.355  | 0.576  | 0.481  |
| A004472_01 | NA     | NA     | -0.229 | -0.334 | NA     | NA     | 0.116  | -0.217 |
| A004474_01 | NA     | NA     | 0.506  | 0.347  | NA     | NA     | 0.145  | 0.001  |
| A004481_01 | -0.713 | -0.318 | -0.287 | -0.144 | -0.233 | -0.244 | 0.011  | 0.154  |
| A004483_01 | -0.611 | -0.283 | -0.069 | 0.008  | 0.037  | 0.002  | 0.067  | 0.008  |
| A004484_01 | 0.82   | 0.88   | 0.145  | 0.205  | 0.144  | 0.571  | 0.36   | 0.518  |
| A004488_01 | 0.263  | NA     | -0.124 | NA     | -0.279 | NA     | NA     | NA     |
| A004489_01 | 0.02   | 0.126  | 0.046  | 0.041  | 0.407  | 0.403  | 0.31   | 0.336  |
| A004491_01 | 0.11   | 0.437  | 0.223  | 0.271  | 0.124  | 0.416  | 0.058  | 0.294  |
| A004493_01 | NA     | NA     | 0.129  | 0.127  | NA     | NA     | -0.298 | -0.153 |
| A004494_01 | 0.198  | 0.144  | 0.105  | 0.172  | 0.118  | 0.176  | 0.279  | 0.377  |
| A004495_01 | -0.992 | -0.297 | 0.069  | 0.171  | -0.829 | -0.39  | -0.276 | -0.3   |
| A004497_01 | -0.461 | -0.632 | -0.706 | -0.471 | -0.556 | -0.576 | -0.588 | -0.621 |
| A004498_01 | 0.309  | 0.293  | -0.3   | -0.076 | -0.099 | 0.339  | 0.224  | 0.553  |
| A004502_01 | -1.407 | -1.238 | 0.122  | 0.142  | -0.39  | -0.234 | -0.092 | 0.066  |
| A004505_01 | 0.095  | 0.077  | 0.104  | 0.086  | -0.445 | -0.32  | -0.219 | -0.272 |
| A004509_01 | -0.568 | -0.23  | 0.467  | 0.34   | 0.1    | 0.258  | 0.213  | 0.15   |
| A004511_01 | -0.506 | -0.184 | 0.21   | 0.119  | 0.077  | 0.232  | 0.145  | 0.149  |
| A004514_01 | -0.695 | -0.257 | -0.303 | -0.151 | -0.537 | -0.321 | -0.179 | 0.041  |
| A004515_01 | NA     | NA     | -0.225 | -0.182 | -0.379 | NA     | 0.053  | -0.273 |
| A004519_01 | NA     | NA     | -0.007 | 0.169  | -0.134 | 0.189  | -0.079 | 0.081  |
| A004520_01 | -0.456 | -0.38  | 0.135  | 0.093  | -0.155 | 0.007  | 0.01   | 0.043  |
| A004522_01 | NA     | NA     | 0.06   | 0.139  | 0.168  | 0.329  | 0.139  | 0.14   |
| A004523_01 | 0.379  | 0.309  | 0.008  | -0.003 | 0.36   | 0.221  | 0.146  | 0.065  |
| A004524_01 | 0.496  | 0.516  | 0.034  | NA     | 0.175  | NA     | NA     | 0.613  |
| A004526_01 | -0.495 | -0.552 | -0.933 | -0.56  | -0.48  | -0.497 | -0.025 | 0.13   |
| A004527_01 | -1.102 | -0.431 | 0.012  | 0.056  | -0.188 | -0.114 | -0.137 | -0.202 |
| A004528_01 | -1.232 | -0.986 | 0.054  | -0.089 | -0.468 | -0.268 | 0.139  | -0.066 |

|            |    |           |           |           |           |           |           |           |        |
|------------|----|-----------|-----------|-----------|-----------|-----------|-----------|-----------|--------|
| A004534_01 |    | 0.013     | 0.079     | -0.017    | -0.13     | 0.218     | 0.188     | 0.208     | -0.031 |
| A004537_01 |    | -0.012    | -0.012    | -1.001    | -0.741    | -0.864    | -0.361    | -0.452    | -0.375 |
| A004541_01 |    | -0.625    | -0.372    | -0.102    | 0.012     | -0.442    | -0.01     | -0.24     | 0.014  |
| A004542_01 |    | -1.113    | -0.893    | 0.475     | 0.352     | -0.607 NA |           | -0.24     | -0.215 |
| A004545_01 |    | 0.345     | 0.584     | 0.294     | 0.275     | 0.473     | 0.509     | 0.204     | 0.196  |
| A004548_01 |    | -0.26     | -0.258    | 0.342     | 0.372     | -1.11 NA  |           | -0.541    | -0.444 |
| A004549_01 |    | 0.29      | -0.002    | -0.069    | -0.032    | 0.057     | -0.159    | 0.049     | 0.102  |
| A004553_01 |    | 0.018     | 0.205     | -0.279    | -0.136    | -0.163    | 0.133     | -0.081    | 0.217  |
| A004557_01 |    | 0.01      | -0.09     | -0.836    | -0.67     | -0.448    | -0.314    | -0.046    | 0.176  |
| A004558_01 |    | -0.197    | -0.197    | -0.01     | -0.057    | -0.367    | -0.248    | -0.233    | -0.385 |
| A004559_01 | NA | NA        |           | 0.337     | 0.31      | -0.01 NA  |           | 0.084 NA  |        |
| A004560_01 |    | 0.033     | 0.012     | -0.025    | -0.111    | 0.155     | 0.049     | -0.006    | -0.083 |
| A004576_01 |    | 0.053     | -0.265    | -0.244    | -0.158    | -0.092    | -0.223    | -0.388    | -0.298 |
| A004577_01 |    | -0.519    | -0.187    | -0.185 NA |           | -0.037 NA |           | 0.306     | 0.538  |
| A004578_01 | NA | NA        |           | -0.495    | -0.358    | 0.026     | 0.356     | 0.261     | 0.324  |
| A004582_01 |    | -0.027    | -0.074    | -0.35     | -0.189    | -0.099    | 0.09      | -0.131    | -0.036 |
| A004587_01 |    | 0.256     | 0.468     | 0.615     | 0.656     | 0.418     | 0.525     | 0.371     | 0.437  |
| A004588_01 |    | 1.092     | 0.841     | 0.627     | 0.46      | 0.905     | 0.992     | 0.798     | 0.713  |
| A004593_01 |    | 0.4       | 0.326     | -0.035    | 0.157     | 0.042     | 0.011     | 0.03      | 0.198  |
| A004594_01 |    | 0.535     | 0.512     | -0.455    | -0.362    | -0.003    | -0.076    | -0.198    | -0.169 |
| A004596_01 |    | -0.088 NA |           | -0.104    | -0.044    | 0.076     | 0.186     | 0.101     | 0.074  |
| A004597_01 |    | -0.049    | 0.533     | 0.267     | 0.239     | 0.089     | 0.129     | -0.322    | -0.276 |
| A004598_01 |    | 0.445     | 0.442     | 0.177     | 0.231     | 0.394     | 0.264     | 0.112     | 0.041  |
| A004599_01 |    | -1.212 NA |           | 0.445     | 0.216     | -0.341    | 0.037     | 0.08      | -0.177 |
| A004602_01 |    | -0.22     | -0.063    | -0.025    | -0.11     | 0.448     | 0.12      | 0.209     | 0.037  |
| A004603_01 |    | 0.855     | 0.782     | 0.221     | 0.223     | 0.697     | 0.654     | 0.684     | 0.707  |
| A004604_01 |    | -0.2      | -0.472 NA |           | -0.947    | 0.162     | 0.257     | 1.107     | 1.154  |
| A004609_01 | NA |           | 0.137     | -0.465 NA | NA        |           | -0.17     | 0.11      | 0.338  |
| A004610_01 |    | -0.411    | -0.21     | -0.033    | 0.035     | -0.21     | -0.028    | -0.055    | -0.039 |
| A004612_01 |    | 0.115     | 0.46      | -0.251    | 0.057     | 0.005     | 0.861     | 0.842     | 1.187  |
| A004615_01 | NA |           | -0.019    | -0.212    | 0.023 NA  |           | 0.154     | 0.234     | 0.169  |
| A004616_01 |    | 0.6       | 0.37      | 0.39      | 0.337     | 0.105     | 0.072     | 0.182     | 0.157  |
| A004617_01 |    | -0.484    | -0.317    | -0.262    | -0.206    | -0.108    | -0.006    | 0.41      | 0.421  |
| A004618_01 |    | -1.759    | -1.274    | 0.291     | 0.272     | -1.271    | -0.696    | -0.308    | -0.37  |
| A004619_01 | NA | NA        |           | 0.083     | -0.096 NA | NA        |           | -0.461    | -0.672 |
| A004620_01 |    | 0.157 NA  |           | 0.105 NA  |           | 0.169     | 0.355     | 0.444 NA  |        |
| A004622_01 |    | -2.108    | -3.119 NA | NA        |           | -2.545    | -2.272    | -2.319 NA |        |
| A004623_01 |    | -0.605    | -0.272    | 0.344     | 0.165     | -0.076    | 0.178     | 0.175     | 0.038  |
| A004629_01 |    | -0.917    | -0.549    | -0.019    | 0.03      | -0.704    | -0.417    | -0.181    | -0.153 |
| A004630_01 |    | -0.69     | -0.437    | -0.12     | -0.033    | -0.862    | -0.674    | -0.353    | -0.432 |
| A004634_01 |    | 0.626     | 1.004     | -0.413    | -0.234    | 0.647     | 1.474     | 1.165     | 1.614  |
| A004635_01 |    | 0.519     | 0.381     | -0.196 NA | NA        |           | 0.209 NA  | NA        |        |
| A004636_01 |    | 0.461     | 0.484     | -0.038    | 0.075     | 0.3       | 0.347     | 0.161     | 0.214  |
| A004637_01 | NA |           | -0.655    | -0.56     | -0.283 NA | NA        | NA        | NA        | -0.644 |
| A004644_01 |    | -0.346 NA |           | 0.341     | 0.083     | 0.056     | -0.023    | 0.048     | -0.221 |
| A004645_01 |    | -0.38     | 0.109     | -0.357    | -0.343    | 0.07      | 0.209     | 0.585     | 0.512  |
| A004646_01 |    | 0.441     | 0.189     | -0.1      | 0.079     | -0.14     | -0.139    | -0.28     | -0.18  |
| A004649_01 |    | 0.637     | 0.491     | -0.185    | -0.099    | 0.241     | 0.188     | 0.312     | 0.411  |
| A004650_01 |    | -0.843 NA |           | -0.238    | -0.036    | -0.135    | 0         | -0.018    | 0.129  |
| A004652_01 | NA | NA        |           | -0.563    | -0.404 NA | NA        |           | -1.225    | -1.046 |
| A004653_01 | NA | NA        | NA        |           | -0.165    | -0.127 NA |           | 0.281 NA  |        |
| A004656_01 |    | -0.171    | -0.141    | -0.619    | -0.467    | -0.96     | -0.848    | -0.776    | -0.822 |
| A004657_01 |    | 0.255     | -0.014    | -0.623 NA |           | -0.333    | -0.138 NA |           | 0.365  |
| A004659_01 |    | 0.219     | 0.298     | 0.303     | 0.295     | 0.078     | 0.103     | 0.056     | 0.03   |
| A004664_01 |    | 0.491     | 0.406     | 0.279     | 0.194     | -0.162    | -0.142    | -0.085    | -0.228 |
| A004669_01 |    | -0.474    | -0.065    | -0.247    | -0.031    | -0.614    | -0.466    | -0.755    | -0.492 |
| A004670_01 |    | 0.142     | 0.088     | -0.279    | -0.291    | 0.258     | 0.112     | 0.467     | 0.26   |
| A004671_01 |    | -0.12     | 0.162     | -0.207    | -0.078    | -0.138    | 0.03      | 0.052     | 0.042  |
| A004678_01 |    | -0.023    | -0.016    | 0.075     | -0.064    | -0.191    | -0.147    | 0.005     | -0.157 |
| A004680_01 |    | -0.547    | -0.664    | 0.027     | 0.025     | -0.765    | -0.742    | -0.419    | -0.57  |
| A004682_01 |    | -0.665    | -0.32     | -1.105    | -0.803    | -0.163    | -0.305    | -0.164    | -0.09  |
| A004683_01 |    | -1.261    | -0.742    | -0.395    | -0.209    | -0.496    | -0.266    | -0.003    | 0.122  |
| A004684_01 |    | -1.671    | -1.888    | -1.826    | -1.32     | -1.169    | -1.463    | -1.081    | -1.122 |
| A004688_01 |    | 0.277     | 0.163     | -0.073    | -0.022    | 0.046     | 0.013     | -0.193    | -0.23  |
| A004689_01 |    | -1.467    | -1.593    | -1.74     | -1.317    | -1.893 NA |           | -1.866    | -2.098 |
| A004695_01 |    | 0.115     | 0.208     | -0.245    | -0.039    | 0.108     | 0.261     | 0.259     | 0.227  |
| A004696_01 |    | -0.832 NA |           | -0.951 NA |           | -0.752 NA | NA        | NA        |        |
| A004701_01 |    | 0.345 NA  |           | -0.487    | -0.087    | 0.013     | 0.677     | 0.096     | 0.616  |

|            |    |           |        |           |           |           |        |          |        |
|------------|----|-----------|--------|-----------|-----------|-----------|--------|----------|--------|
| A004704_01 |    | -1.543    | -0.776 | 0.454     | 0.563     | -1.318    | -0.643 | -0.288   | -0.128 |
| A004705_01 |    | -0.502    | -0.227 | 0.416     | 0.353     | 0.206     | 0.173  | 0.211    | 0.182  |
| A004714_01 |    | 0.521     | 0.243  | -0.654    | -0.407    | -0.037 NA | NA     | NA       |        |
| A004716_01 | NA | NA        |        | 0.27      | 0.053     | -0.242 NA |        | -0.288   | -0.553 |
| A004717_01 |    | -0.426    | -0.303 | -0.035    | -0.183    | 0.042     | 0.151  | 0.133    | 0.087  |
| A004722_01 |    | -0.906    | -0.204 | -0.654    | -0.507    | 0.295     | 0.297  | 0.756    | 0.811  |
| A004725_01 |    | 0.413     | 0.38   | 0.043     | -0.119    | 0.133 NA  |        | 0.175    | 0.042  |
| A004727_01 | NA | NA        |        | -1.168    | -0.831 NA | NA        |        | -0.427   | -0.428 |
| A004728_01 |    | 0.142     | 0.385  | -0.578    | -0.394    | -0.021    | 0.275  | 0.466    | 0.643  |
| A004735_01 |    | -0.181    | -0.203 | 0.222     | 0.333     | 0.238     | 0.342  | 0.014    | 0.132  |
| A004736_01 |    | 0.516     | 0.366  | 0.012     | -0.108    | 0.245     | 0.241  | 0.365    | 0.291  |
| A004738_01 |    | 0.012     | 0.142  | -0.237    | -0.172    | -0.234    | -0.137 | 0.191    | 0.014  |
| A004739_01 |    | -0.563 NA |        | -0.854 NA |           | -0.598 NA |        | 0.119 NA |        |
| A004740_01 |    | 0.55      | 0.693  | -0.403 NA |           | 0.199 NA  | NA     | NA       |        |
| A004743_01 |    | -0.019 NA |        | -0.54     | -0.272    | -0.214 NA |        | -0.186   | 0.033  |
| A004744_01 |    | -0.222    | -0.13  | -0.634    | -0.303    | -0.368 NA |        | -0.366   | -0.099 |
| A004747_01 |    | -0.158    | -0.064 | 0.147     | -0.028    | -0.041    | -0.09  | -0.002   | -0.152 |
| A004748_01 |    | -0.04     | 0.251  | 0.008     | -0.005    | 0.497     | 0.653  | 0.084    | 0.262  |
| A004752_01 |    | -1.134 NA |        | -0.202    | -0.039 NA |           | -0.451 | -0.445   | -0.207 |
| A004754_01 |    | -0.068    | 0.19   | 0.072     | 0.147     | 0.298     | 0.487  | 0.563    | 0.553  |
| A004757_01 | NA | NA        |        | -0.099    | -0.137 NA | NA        |        | -0.011   | 0.02   |
| A004759_01 |    | -0.001    | -0.096 | -0.35     | -0.052    | -0.416    | -0.485 | -0.417   | -0.319 |
| A004762_01 |    | -0.195    | 0.024  | -0.399    | -0.267    | -0.077    | -0.027 | 0.012    | -0.011 |
| A004766_01 |    | -0.261    | -0.127 | 0.108     | 0.072     | -0.318    | -0.213 | -0.167   | -0.27  |
| A004768_01 |    | -0.742 NA |        | 0.325     | 0.155     | -0.306    | -0.166 | -0.001   | -0.183 |
| A004769_01 |    | 0.058     | 0.522  | -0.103    | 0.033     | 0.398     | 0.754  | 0.868    | 1.1    |
| A004772_01 |    | 0.2       | 0.184  | -0.115    | -0.11     | -0.022    | -0.043 | 0.076    | 0.08   |
| A004774_01 |    | -0.926    | -0.23  | 0.393     | 0.49      | 0.399     | 0.632  | 0.146    | 0.242  |
| A004777_01 |    | 0.62      | 0.726  | -0.39     | -0.137    | 0.32      | 0.453  | -0.068   | 0.105  |
| A004789_01 |    | 0.15      | 0.187  | 0.137     | 0.097     | -0.145    | 0.004  | -0.038   | -0.005 |
| A004792_01 |    | 0.36      | 0.212  | -0.151    | -0.131    | 0.106     | -0.038 | -0.011   | -0.032 |
| A004795_01 | NA | NA        |        | -0.303    | -0.11 NA  | NA        |        | -0.174   | -0.246 |
| A004799_01 |    | -0.315 NA |        | -0.008    | 0.012     | -0.26 NA  |        | -0.012   | -0.218 |
| A004801_01 |    | 0.267     | 0.183  | -0.249    | -0.112    | -0.026    | 0.173  | 0.205    | 0.444  |
| A004804_01 |    | -0.323    | -0.242 | -0.338    | -0.154    | -0.535    | -0.347 | -0.223   | -0.028 |
| A004805_01 |    | -1.292 NA |        | -0.478    | -0.301    | -1.373 NA |        | -0.405   | -0.378 |
| A004810_01 |    | -1.434    | -1.067 | -0.128    | -0.06     | -0.798    | -0.436 | -0.282   | -0.377 |
| A004815_01 |    | -0.38     | -0.048 | 0.106     | 0.158     | 0.277     | 0.343  | 0.14     | 0.274  |
| A004820_01 |    | -1.535    | -1.618 | -0.32     | -0.206    | -1.118    | -0.836 | -0.525   | -0.546 |
| A004825_01 |    | 0.381     | 0.296  | 0.155     | 0.191     | -0.159    | -0.079 | 0.034    | 0.112  |
| A004828_01 |    | 0.01 NA   |        | 0.177     | 0.159     | 0.139     | 0.09   | -0.095   | -0.099 |
| A004830_01 | NA | NA        |        | 0.422     | 0.41 NA   | NA        |        | 0.218    | 0.055  |
| A004837_01 |    | -0.478    | -0.038 | 0.139     | 0.167     | 0.178     | 0.185  | 0.07     | 0.146  |
| A004839_01 |    | -0.143    | -0.342 | -0.466    | -0.339    | -0.628    | -0.524 | -0.45    | -0.37  |
| A004842_01 |    | 0.085     | 0.152  | 0.249     | 0.19      | 0.072     | 0.226  | 0.155    | 0.051  |
| A004843_01 |    | 0.707     | 0.496  | 0.192     | 0.353     | 0.103     | 0.18   | -0.07    | 0.263  |
| A004846_01 |    | 0.187     | -0.199 | -1.196    | -1.222    | -0.623    | -0.598 | -0.368   | -0.358 |
| A004848_01 | NA | NA        |        | -0.237    | -0.023 NA | NA        |        | -0.318   | -0.031 |
| A004853_01 |    | -1.06     | -0.648 | -0.514    | -0.355    | -0.574    | -0.392 | -0.589   | -0.473 |
| A004859_01 | NA | NA        |        | -0.251    | -0.187 NA | NA        |        | -0.987   | -1.058 |
| A004860_01 |    | -0.446    | -0.232 | -0.219    | -0.063    | -0.251    | 0.133  | -0.017   | 0.187  |
| A004862_01 |    | 0.102 NA  |        | 0.029     | -0.036    | -0.154 NA |        | -0.138   | -0.269 |
| A004863_01 |    | 0.269     | -0.071 | -0.186    | -0.203    | -0.356    | -0.3   | -0.055   | -0.038 |
| A004866_01 |    | 0.174     | 0.113  | 0.165     | 0.078     | 0.195     | 0.06   | 0.091    | 0.097  |
| A004867_01 |    | 0.029     | 0.171  | 0.497     | 0.444     | 0.372     | 0.477  | 0.274    | 0.123  |
| A004882_01 |    | 0.863     | 0.593  | 0.505 NA  | NA        |           | 0.633  | 0.777    | 1.117  |
| A004883_01 |    | 0.149     | 0.08   | -0.303    | -0.14     | -0.128    | -0.129 | 0.021    | 0.044  |
| A004885_01 |    | -0.42     | -0.192 | -0.055    | -0.154    | -0.172    | 0.017  | -0.077   | -0.186 |
| A004887_01 |    | 0.208     | 0.094  | -0.239    | 0.038     | 0.213     | 0.166  | 0.123    | 0.234  |
| A004889_01 | NA |           | -0.067 | -0.161    | -0.083    | 0.044     | -0.248 | 0.151    | 0.123  |
| A004891_01 |    | 0.027     | 0.027  | -0.18     | -0.166    | 0.091     | 0.227  | 0.353    | 0.481  |
| A004894_01 |    | 0.206     | -0.078 | -0.834    | -0.762    | -0.102    | -0.213 | -0.928   | -1.063 |
| A004896_01 |    | -0.033    | 0.046  | -0.128    | -0.05     | 0.097     | 0.124  | 0.28     | 0.302  |
| A004901_01 | NA | NA        |        | 0.324     | 0.258 NA  | NA        |        | 0.28     | 0.282  |
| A004903_01 |    | -0.565    | -0.067 | 0.082     | 0.012     | 0.127     | 0.099  | 0.162    | 0.07   |
| A004908_01 |    | -1.134 NA |        | 0.406     | 0.293     | -0.677 NA |        | 0.117    | -0.055 |
| A004910_01 |    | -0.654 NA |        | 0.106     | 0.238     | -0.705 NA |        | -0.549   | -0.508 |
| A004915_01 |    | -0.512    | -0.159 | 0.506     | 0.455     | 0.369     | 0.464  | 0.222    | 0.238  |

|            |    |        |        |        |        |        |    |        |        |        |      |
|------------|----|--------|--------|--------|--------|--------|----|--------|--------|--------|------|
| A004916_01 | NA | NA     |        | 0.009  | 0.159  | 0.241  | NA |        | 0.407  | 0.362  |      |
| A004918_01 |    | -0.016 | 0.016  | 0.255  | 0.357  | -0.647 |    | -0.454 | -0.148 | -0.228 |      |
| A004921_01 |    | -0.898 | -0.883 | -0.104 | -0.025 | -0.163 |    | 0.103  | 0.467  | 0.354  |      |
| A004922_01 |    | 0.299  | 0.192  | -0.214 | NA     | -0.217 | NA |        | NA     |        |      |
| A004927_01 |    | 0.417  | 0.118  | -0.73  | -0.527 | -0.345 |    | -0.127 | -0.199 | 0.042  |      |
| A004931_01 |    | 0.447  | 0.575  | 0.496  | 0.422  | 0.86   |    | 0.973  | 0.849  | 0.786  |      |
| A004932_01 |    | 0.187  | 0.531  | 0.323  | 0.393  | 0.178  |    | 0.789  | 0.401  | 0.667  |      |
| A004934_01 |    | 0.399  | 0.193  | -0.166 | -0.106 | 0.422  |    | 0.627  | 0.678  | 0.73   |      |
| A004941_01 |    | 0.428  | 0.333  | 0.101  | 0.178  | 0.318  |    | 0.291  | 0.417  | 0.456  |      |
| A004944_01 |    | 0.902  | 0.408  | 0.136  | 0.235  | -0.214 |    | -0.06  | -0.152 | 0.052  |      |
| A004948_01 | NA |        | -0.544 | 0.308  | 0.259  | -0.262 |    | -0.483 | -0.254 | -0.293 |      |
| A004962_01 |    | 0.207  | 0.092  | -0.268 | -0.16  | -0.593 |    | -0.471 | -0.465 | -0.333 |      |
| A004978_01 |    | 0.201  | 0.426  | 0.125  | 0.106  | 0.865  |    | 0.687  | 0.624  | 0.472  |      |
| A004994_01 |    | 0.772  | 0.746  | -0.605 | -0.308 | -0.063 |    | 0.481  | 0.241  | 0.527  |      |
| A005002_01 |    | -0.825 | -0.56  | -0.163 | -0.088 | -0.569 |    | -0.491 | -0.274 | -0.32  |      |
| A005005_01 |    | -1.362 | -1.356 | -0.591 | -0.479 | -1.194 |    | -1.033 | -0.586 | -0.668 |      |
| A005009_01 | NA |        | 0.105  | 0.43   | 0.435  | -0.003 |    | 0.127  | -0.053 | 0.11   |      |
| A005012_01 | NA | NA     |        | -0.989 | -0.768 | NA     | NA |        | -1.387 | -1.63  |      |
| A005018_01 |    | 0.418  | 0.312  | -0.41  | -0.158 | -0.364 |    | 0.338  | 0.285  | 0.641  |      |
| A005022_01 |    | -0.072 | 0.126  | -0.008 | 0.013  | 0.232  |    | 0.104  | 0.01   | 0.172  |      |
| A005023_01 | NA |        | -1.121 | 0.566  | 0.566  | -0.581 | NA |        | 0.02   | 0.021  |      |
| A005029_01 |    | 0.309  | -0.084 | -0.499 | -0.418 | -0.098 |    | -0.179 | -0.16  | -0.156 |      |
| A005042_01 |    | -0.232 | 0.406  | 0.343  | 0.456  | 0.885  |    | 1.041  | 0.489  | 0.818  |      |
| A005048_01 |    | 0.488  | 0.662  | -0.109 | 0.09   | 0.19   |    | 0.596  | 0.045  | 0.645  |      |
| A005065_01 |    | -0.067 | 0.167  | 0      | 0.07   | 0.458  |    | 0.55   | 0.313  | 0.428  |      |
| A005067_01 |    | -0.604 | -0.238 | 0.031  | 0.134  | 0.087  |    | 0.139  | 0.413  | 0.356  |      |
| A005068_01 |    | -0.041 | 0.003  | -0.685 | -0.512 | -0.3   |    | -0.198 | -0.213 | -0.2   |      |
| A005069_01 |    | 0.367  | 0.046  | -1.173 | -0.881 | -0.748 |    | -0.632 | -0.478 | -0.387 |      |
| A005075_01 |    | -0.626 | -1.613 | NA     | NA     | -1.298 |    | -1.434 | NA     | NA     |      |
| A005084_01 |    | 0.088  | 0.327  | 0.073  | 0.143  | 0.368  |    | 0.352  | 0.238  | 0.224  |      |
| A005086_01 |    | -1.965 | -0.867 | -0.05  | 0.073  | 0.576  |    | 0.857  | 0.848  | 0.921  |      |
| A005093_01 |    | -0.908 | -0.362 | -0.172 | -0.068 | -0.101 |    | -0.15  | -0.282 | -0.139 |      |
| A005095_01 |    | 0.392  | NA     | -0.235 | -0.053 | -0.023 | NA |        | -0.17  | 0.047  |      |
| A005097_01 |    | 0.448  | 0.412  | 0.153  | 0.217  | 0.305  |    | 0.754  | 0.382  | 0.605  |      |
| A005122_01 |    | 0.131  | 0.255  | 0.25   | 0.304  | -0.072 |    | -0.129 | 0.068  | 0.13   |      |
| A005126_01 | NA | NA     |        | 0.46   | 0.436  | -0.285 | NA |        | -0.113 | -0.087 |      |
| A005129_01 |    | 0.408  | 0.46   | 0.272  | 0.231  | 0.342  |    | 0.568  | 0.03   | -0.053 |      |
| A005132_01 |    | -0.457 | 0.005  | -0.499 | -0.259 | 0.253  |    | 0.101  | 0.407  | 0.314  |      |
| A005145_01 |    | 0.179  | 0.015  | -0.125 | -0.094 | -0.453 |    | -0.362 | -0.348 | -0.367 |      |
| A005146_01 |    | -0.151 | -0.366 | -0.553 | -0.335 | -0.177 |    | -0.33  | -0.258 | -0.105 |      |
| A005155_01 |    | -1.226 | -1.697 | -2.002 | -1.315 | -1.724 |    | -1.524 | -1.033 | -0.675 |      |
| A005160_01 |    | -0.519 | -0.342 | -0.585 | -0.396 | -1.223 |    | -0.847 | -0.954 | -1.012 |      |
| A005162_01 |    | 0.104  | 0.174  | 0.081  | 0.278  | 0.154  |    | 0.198  | 0.143  | 0.295  |      |
| A005163_01 |    | 0.475  | 0.382  | 0.255  | 0.084  | 0.053  |    | 0.036  | -0.08  | 0.028  |      |
| A005164_01 |    | 0.379  | 0.547  | -0.06  | 0.13   | 0.313  |    | 0.757  | 0.737  | 0.804  |      |
| A005167_01 |    | 0.189  | 0.052  | -0.163 | -0.02  | -0.053 |    | 0.083  | 0.023  | 0.134  |      |
| A005171_01 |    | -1.082 | -0.483 | -0.315 | -0.428 | -1.339 |    | -0.194 | -0.133 | -0.27  |      |
| A005173_01 |    | -0.352 | -0.009 | -0.135 | -0.08  | 0.133  |    | 0.078  | 0.085  | -0.049 |      |
| A005175_01 |    | 0.499  | 0.727  | -0.301 | -0.173 | 0.151  |    | 0.415  | 0.399  | 0.563  |      |
| A005176_01 |    | 1.386  | 1.48   | -2.538 | -1.912 | 0.828  |    | 0.823  | 1.761  | 1.876  |      |
| A005178_01 |    | -0.33  | -0.123 | -0.533 | -0.328 | -0.359 |    | -0.17  | -0.118 | 0.131  |      |
| A005179_01 | NA | NA     |        | -0.156 | -0.174 | NA     | NA |        | -0.3   | -0.42  |      |
| A005180_01 |    | -0.349 | -0.156 | -0.263 | -0.194 | -0.184 |    | -0.064 | -0.039 | 0.089  |      |
| A005182_01 |    | 0.479  | 0.453  | -0.32  | -0.324 | 0.719  |    | 0.781  | 0.201  | 0.185  |      |
| A005187_01 |    | 0.583  | 0.182  | -0.059 | 0.081  | -0.08  |    | -0.098 | 0.085  | 0.093  |      |
| A005188_01 |    | 0.339  | 0.04   | -0.054 | 0.047  | -0.511 |    | -0.533 | -0.27  | -0.224 |      |
| A005190_01 | NA | NA     |        | -0.755 | NA     | NA     | NA |        | -0.055 | 0.173  |      |
| A005195_01 |    | -0.087 | 0.264  | -0.364 | -0.351 | -0.274 |    | 0.159  | 0.041  | 0.073  |      |
| A005196_01 | NA | NA     |        | -0.068 | NA     | NA     | NA |        | 0.394  | 0.606  |      |
| A005197_01 |    | 0.303  | 0.079  | -0.544 | -0.501 | -0.191 |    | -0.03  | -0.197 | -0.138 |      |
| A005199_01 |    | 0.306  | 0.143  | -0.132 | NA     | 0.202  |    | 0.052  | 0.389  | 0.365  |      |
| A005203_01 |    | 0.118  | 0.132  | -0.188 | -0.041 | -0.426 |    | -0.264 | -0.204 | -0.022 |      |
| A005204_01 |    | -0.111 | -0.07  | -0.48  | -0.411 | -0.18  |    | -0.274 | 0.143  | 0.071  |      |
| A005208_01 |    | -1.631 | NA     | -2.296 | -1.348 | NA     | NA |        | -1.621 | -1.637 |      |
| A005209_01 | NA | NA     |        | -0.624 | -0.458 | NA     | NA |        | -0.1   | 0.045  |      |
| A005211_01 |    | 0.565  | 0.466  | -0.358 | -0.171 | -0.213 |    | -0.069 | -0.164 | 0.078  |      |
| A005214_01 |    | 0.203  | -0.104 | -0.171 | NA     | -0.137 |    | -0.279 | 0.147  | 0.156  |      |
| A005220_01 |    | 0.555  | 0.685  | -0.223 |        | 0.13   |    | 0.44   | 0.758  | 0.117  | 0.81 |



|            |    |        |    |        |        |    |        |        |        |        |        |        |
|------------|----|--------|----|--------|--------|----|--------|--------|--------|--------|--------|--------|
| A005223_01 |    | 0.115  | NA |        | -0.669 | NA |        | -0.419 | NA     |        | -0.851 | NA     |
| A005224_01 | NA |        | NA |        | -0.139 |    | -0.04  | NA     |        | NA     | 0.096  | -0.018 |
| A005227_01 |    | -0.079 |    | 0.223  | 0.161  |    | 0.233  |        | 0.553  | 0.48   | 0.447  | 0.49   |
| A005234_01 |    | 0.513  |    | 0.405  | -0.19  |    | 0.112  |        | 0.411  | 0.66   | 0.466  | 0.849  |
| A005236_01 |    | -0.242 |    | 0.224  | -0.062 | NA |        |        | 0.387  | 0.379  | NA     | 0.624  |
| A005239_01 |    | 0.201  | NA |        |        | NA |        | 0.004  | 0.094  | 0.009  | 0.216  | 0.146  |
| A005246_01 |    | -0.742 |    | -0.536 | -0.996 |    | -0.672 |        | -0.447 | 0.074  | -0.379 | -0.151 |
| A005247_01 |    | -0.541 |    | -0.419 | 0.084  |    | -0.1   |        | -0.62  | -0.449 | -0.337 | -0.41  |
| A005249_01 |    | 0.197  | NA |        | 0.384  |    | 0.445  |        | 0.419  | 0.59   | 0.506  | 0.522  |
| A005251_01 | NA |        | NA |        | 0.058  |    | 0.269  | NA     |        | NA     | NA     | NA     |
| A005260_01 |    | 0.348  |    | 0.236  | 0.108  |    | 0.054  |        | -0.011 | -0.046 | 0.123  | 0.046  |
| A005262_01 |    | 0.356  |    | 0.324  | -0.526 |    | -0.323 |        | -0.13  | 0.103  | -0.211 | 0.156  |
| A005267_01 | NA |        | NA |        | 0.231  |    | 0.229  |        | -0.572 | -0.243 | -0.091 | -0.016 |
| A005278_01 |    | 0.095  |    | -0.066 | 0.087  |    | 0.117  |        | 0.051  | 0.118  | 0.294  | 0.353  |
| A005279_01 |    | 0.01   |    | -0.016 | -0.66  |    | -0.437 |        | -0.32  | -0.002 | -0.491 | -0.469 |
| A005302_01 |    | -0.556 | NA |        | 0.371  |    | 0.265  |        | 0.142  | NA     | -0.133 | -0.086 |
| A005305_01 |    | 0.132  |    | 0.037  | -0.221 |    | -0.083 |        | -0.103 | -0.021 | -0.163 | -0.025 |
| A005310_01 |    | 0.902  |    | 0.821  | 0.19   |    | 0.387  |        | 0.158  | 0.942  | 0.307  | 0.957  |
| A005332_01 |    | 0.415  |    | 0.227  | -0.104 |    | -0.035 |        | 0.3    | 0.168  | 0.141  | 0.252  |
| A005335_01 |    | -0.347 |    | -0.427 | -0.443 |    | -0.419 |        | -0.006 | -0.048 | -0.124 | -0.189 |
| A005338_01 | NA |        |    | 0.404  | -0.366 |    | -0.261 | NA     |        | -0.836 | -1.143 | -1.081 |
| A005346_01 | NA |        | NA |        | -0.402 | NA |        | NA     |        | 0.027  | 0.199  | 0.346  |
| A005354_01 | NA |        | NA |        | -0.89  |    | -0.55  | NA     |        | NA     | -0.778 | -0.442 |
| A005356_01 |    | 1.283  |    | 0.691  | 0.378  |    | 0.322  |        | 0.709  | 0.743  | 0.436  | 0.532  |
| A005357_01 |    | -0.531 |    | -0.125 | 0.221  |    | 0.208  |        | 0.42   | 0.323  | 0.429  | 0.415  |
| A005366_01 |    | -2.086 |    | -1.67  | 0.62   |    | 0.517  |        | -1.103 | -0.572 | -0.001 | 0.038  |
| A005367_01 |    | -0.276 | NA |        | 0.057  |    | 0.068  |        | -0.113 | NA     | -0.062 | -0.334 |
| A005368_01 |    | 0.653  |    | 0.49   | -0.051 |    | -0.035 |        | 0.159  | 0.11   | 0.236  | 0.226  |
| A005371_01 |    | 0.204  |    | 0.494  | -0.47  |    | -0.306 |        | 0.038  | 0.355  | 0.634  | 0.665  |
| A005376_01 |    | 0.628  |    | 0.424  | -0.192 | NA |        | NA     |        | 0.259  | NA     | 0.268  |
| A005377_01 |    | 0.721  |    | 0.654  | -0.129 |    | -0.025 |        | 0.5    | 1.205  | 1.131  | 1.28   |
| A005384_01 | NA |        | NA |        | NA     |    | NA     |        | NA     | NA     | NA     | NA     |
| A005386_01 |    | 0.286  |    | -0.275 | 0.043  |    | 0.154  |        | -0.331 | -0.472 | -0.107 | -0.073 |
| A005389_01 | NA |        | NA |        | -0.552 |    | -0.378 | NA     |        | NA     | -0.626 | -0.557 |
| A005390_01 |    | 0.028  |    | -0.192 | -0.875 |    | -0.811 |        | -0.395 | -0.625 | -0.288 | -0.206 |
| A005391_01 | NA |        |    | -0.161 | -0.385 |    | -0.335 |        | -0.251 | NA     | -0.485 | -0.437 |
| A005394_01 |    | -0.658 |    | -0.779 | -1.2   |    | -0.957 |        | -1.451 | -1.437 | -1.058 | -1.047 |
| A005395_01 |    | -0.129 |    | -0.113 | -0.286 |    | -0.182 |        | -0.074 | -0.143 | 0.005  | -0.177 |
| A005401_01 |    | -0.396 | NA |        | 0.061  |    | 0.07   | NA     |        | -0.283 | -0.523 | -0.688 |
| A005403_01 |    | -0.874 |    | -0.868 | 0.258  |    | 0.156  |        | 0.022  | -0.029 | 0.615  | 0.56   |
| A005407_01 |    | -0.355 |    | -0.111 | 0.288  |    | 0.134  |        | 0.413  | 0.192  | 0.184  | 0.016  |
| A005410_01 |    | 0.706  |    | 0.504  | 0.133  |    | 0.14   |        | 0.502  | 0.291  | 0.742  | 0.839  |
| A005411_01 |    | 0.699  |    | 0.598  | -0.145 |    | 0.049  |        | 0.178  | 0.472  | 0.317  | 0.696  |
| A005413_01 |    | 0.175  |    | 0.04   | 0.047  |    | 0.15   |        | -0.102 | 0.254  | 0.07   | 0.252  |
| A005414_01 | NA |        | NA |        | 0.183  |    | 0.049  |        | 0.168  | 0.132  | 0.097  | -0.027 |
| A005416_01 |    | 0.36   |    | 0.323  | -0.523 |    | -0.515 |        | 0.265  | 0.294  | 0.609  | 0.676  |
| A005417_01 |    | 0.591  |    | 0.307  | 0.298  |    | 0.342  |        | 0.199  | 0.308  | 0.255  | 0.384  |
| A005426_01 |    | 0.415  |    | 0.639  | -0.027 |    | 0.047  |        | -0.729 | -0.296 | 0.006  | 0.027  |
| A005431_01 |    | -0.717 |    | -0.389 | -0.053 |    | -0.055 |        | -0.175 | NA     | -0.21  | -0.178 |
| A005434_01 |    | -1.314 |    | -0.934 | -0.729 |    | -0.601 |        | -0.876 | -0.484 | 0.111  | -0.215 |
| A005439_01 |    | -0.247 |    | -0.428 | 0.296  |    | 0.313  |        | 0.18   | 0.113  | 0.105  | 0.186  |
| A005477_01 |    | 0.946  |    | 0.62   | -0.078 |    | 0.061  |        | 0.064  | 0.407  | -0.448 | -0.123 |
| A005500_01 |    | -0.076 |    | -0.341 | 0.015  |    | 0.001  |        | -0.259 | -0.384 | 0.076  | -0.146 |
| A005506_01 |    | -0.417 |    | -0.461 | -0.328 |    | -0.248 |        | -0.525 | -0.433 | -0.336 | -0.217 |
| A005518_01 |    | 0.379  |    | 0.346  | -0.181 | NA |        | NA     |        | 0.117  | NA     | NA     |
| A005521_01 |    | -0.408 |    | -0.532 | 0.437  |    | 0.339  |        | -0.591 | -0.743 | -0.22  | -0.359 |
| A005522_01 |    | 0.591  |    | 0.315  | -0.531 |    | -0.301 |        | 0.357  | 0.333  | -0.304 | 0.132  |
| A005526_01 |    | 0.663  |    | 0.039  | -0.175 | NA |        |        | 0.074  | -0.213 | 0.051  | NA     |
| A005532_01 |    | 0.022  |    | -0.132 | -0.249 |    | -0.228 |        | -0.391 | -0.308 | -0.202 | -0.278 |
| A005542_01 |    | 0.196  |    | 0.033  | -0.225 |    | -0.068 |        | -0.235 | -0.264 | -0.069 | -0.178 |
| A005552_01 |    | 0.41   |    | 0.667  | NA     |    | -0.796 |        | -0.354 | 0.507  | -0.226 | 0.487  |
| A005553_01 |    | -0.654 |    | -0.332 | -0.002 |    | -0.095 |        | -0.716 | -0.515 | -0.092 | -0.353 |
| A005557_01 |    | 0.435  |    | 0.505  | 0.157  |    | 0.181  |        | 0.613  | 0.439  | 0.249  | 0.33   |
| A005558_01 |    | 0.082  |    | 0.15   | -0.613 |    | -0.342 |        | -0.079 | 0.142  | -0.204 | 0.285  |
| A005562_01 |    | 0.184  |    | 0.156  | 0.313  |    | 0.375  |        | 0.45   | 0.436  | 0.593  | 0.508  |
| A005564_01 |    | -0.841 |    | -0.473 | -0.418 |    | -0.301 |        | -0.078 | 0.191  | 0.426  | 0.612  |
| A005571_01 |    | -0.45  |    | -0.551 | -0.085 |    | -0.104 |        | -0.772 | -0.79  | -0.553 | -0.762 |
| A005576_01 |    | -1.433 |    | -1.931 | NA     |    | -1.971 | NA     |        | -1.775 | -1.619 | -1.94  |

|            |    |        |        |           |          |           |          |           |        |
|------------|----|--------|--------|-----------|----------|-----------|----------|-----------|--------|
| A005577_01 |    | 0.607  | 0.376  | 0.067     | 0.157    | 0.194     | 0.399    | 0.259     | 0.496  |
| A005583_01 |    | -0.192 | 0.056  | 0.32      | 0.244    | 0.213     | 0.372    | 0.184     | 0.167  |
| A005588_01 |    | 1.112  | 0.789  | -0.161 NA |          | 0.531     | 0.549    | 0.341     | 0.825  |
| A005589_01 |    | 0.682  | 0.613  | -0.08     | 0.003    | 0.273     | 0.493    | 0.242     | 0.737  |
| A005590_01 |    | -0.453 | -0.695 | -0.943    | -0.601   | -1.408    | -1.189   | -1.241    | -0.886 |
| A005591_01 |    | 0.02   | -0.013 | 0.04      | 0.061    | -0.328    | -0.317   | -0.224    | -0.414 |
| A005592_01 |    | 0.076  | 0.422  | -0.176    | -0.094   | -0.012    | 0.178    | 0.157     | 0.009  |
| A005594_01 |    | 0.198  | 0.097  | -0.349    | -0.233   | 0.146     | 0.066    | 0.225     | 0.263  |
| A005600_01 |    | 1.064  | 0.69   | -0.235 NA |          | 0.307     | 0.457    | 0.19      | 0.764  |
| A005601_01 |    | 0.908  | 0.736  | -0.15     | 0.097    | 0.38      | 0.476    | 0.303     | 0.689  |
| A005609_01 |    | -0.024 | -0.008 | -0.012    | 0.086    | -0.129 NA |          | 0.101     | 0.21   |
| A005613_01 |    | -0.933 | -0.718 | 0.509     | 0.282    | -0.226    | -0.248   | -0.109    | -0.407 |
| A005615_01 | NA |        | -0.689 | -1.049    | -0.839   | -0.791    | -0.972   | -0.695    | -0.49  |
| A005616_01 |    | 0.474  | 0.389  | -0.047    | 0.026    | 0.246     | 0.516    | 0.47      | 0.687  |
| A005620_01 |    | -0.147 | 0.407  | 0.036     | 0.124    | 0.309     | 0.51     | 0.17      | 0.354  |
| A005629_01 |    | -0.299 | -0.158 | 0.49      | 0.387    | -0.207    | -0.217   | -0.043    | -0.252 |
| A005636_01 |    | -0.032 | 0.337  | -0.287    | -0.118   | -0.366    | 0.445    | -0.015    | 0.503  |
| A005646_01 |    | 0.293  | 0.095  | -0.142    | -0.094   | -0.204    | -0.075   | 0.116     | 0.111  |
| A005648_01 |    | 1.294  | 1.165  | 0.197     | 0.198    | -0.044    | 0.011    | -0.153    | -0.088 |
| A005655_01 |    | -0.025 | -0.018 | 0.115     | 0.175    | 0.295     | 0.237    | 0.085     | 0.209  |
| A005659_01 | NA | NA     |        | 0.296     | 0.261 NA | NA        |          | 0.17      | 0.153  |
| A005661_01 |    | -2.179 | -3.093 | -3.783    | -2.642   | -2.462    | -2.138   | -2.379    | -2.32  |
| A005677_01 |    | 0.235  | 0.113  | -0.098    | -0.174   | 0.287     | 0.213    | -0.016    | -0.026 |
| A005680_01 |    | -0.108 | -0.406 | -0.612    | -0.514   | -0.78     | -0.924   | -0.708    | -0.807 |
| A005687_01 |    | 1.389  | 1.311  | 0.546     | 0.58     | 0.728     | 0.704    | 0.545     | 0.666  |
| A005688_01 |    | 0.391  | 0.397  | -0.757    | -0.466   | 0.035     | 0.492    | 0.57      | 0.816  |
| A005690_01 |    | 0.156  | 0.167  | -0.069    | -0.044   | 0.117     | 0.093    | 0.223     | 0.312  |
| A005692_01 | NA | NA     |        | 0.389     | 0.279 NA | NA        |          | 0.152     | 0.318  |
| A005695_01 |    | 0.957  | 0.862  | 0.419     | 0.535    | 0.46      | 0.503    | 0.16      | 0.239  |
| A005699_01 |    | 0.179  | -0.008 | -0.213    | -0.151   | -0.842    | -0.732   | -0.61     | -0.516 |
| A005701_01 |    | -1.169 | -0.528 | 0.176     | 0.409    | 0.025     | 0.16     | -0.207    | 0.018  |
| A005702_01 | NA | NA     |        | -0.237 NA | NA       | NA        | NA       | NA        | NA     |
| A005703_01 | NA | NA     |        | 0.417     | 0.384 NA |           | -0.143   | -0.236    | -0.236 |
| A005706_01 |    | 0.4    | 0.427  | 0.058     | 0.291    | -0.183    | -0.048   | -0.093    | 0.272  |
| A005707_01 |    | 0.855  | 0.603  | -0.197    | 0.247    | -0.171    | -0.046   | -0.135    | 0.253  |
| A005708_01 |    | 0.823  | 0.603  | -0.079    | 0.138    | -0.2      | -0.115   | -0.146    | 0.037  |
| A005709_01 |    | 0.637  | 0.601  | -0.095    | 0.073    | -0.309    | -0.186   | -0.108    | 0.025  |
| A005710_01 |    | 0.746  | 0.447  | -0.766 NA |          | 0.111     | 0.232 NA |           | 0.757  |
| A005712_01 |    | 0.656  | 0.44   | -0.753    | -0.554   | 0.149     | -0.04    | -0.12     | 0.102  |
| A005713_01 |    | 0.176  | -0.383 | -0.215    | -0.194   | -0.302    | -0.372   | -0.491    | -0.274 |
| A005714_01 |    | -1.733 | -2.327 | -2.534    | -1.928   | -2.026    | -1.914   | -1.789    | -2.076 |
| A005715_01 |    | 0.008  | -0.224 | -0.348    | -0.052   | -0.51     | -0.62    | -0.54     | -0.198 |
| A005718_01 |    | 0.702  | 0.516  | 0.111     | 0.196    | 0.173     | 0.344    | 0.168     | 0.455  |
| A005719_01 |    | 0.516  | 0.461  | -0.358    | -0.148   | -0.286    | -0.066   | -0.13     | 0.261  |
| A005720_01 |    | 0.744  | 0.686  | -0.277    | -0.031   | -0.624    | -0.478   | -0.247    | -0.192 |
| A005721_01 |    | 0.744  | 0.574  | -0.067    | 0.084    | -0.417    | -0.36    | -0.302    | -0.224 |
| A005722_01 |    | 0.033  | -0.207 | -0.951 NA |          | -0.579    | -0.584   | -0.431    | -0.332 |
| A005723_01 |    | -0.04  | -0.228 | -1.044 NA |          | -0.642    | -0.699   | -0.746 NA |        |
| A005725_01 |    | 0.341  | 0.056  | 0.109     | 0.129    | 0.282     | 0.099    | 0.096     | -0.049 |
| A005726_01 |    | -0.789 | -0.909 | -0.561    | -0.251   | -1.616    | -1.286   | -0.876    | -0.7   |
| A005727_01 |    | -4.053 | -4.429 | -1.386    | -0.878   | -3.698    | -2.956   | -2.668    | -2.672 |
| A005729_01 |    | 0.452  | 0.749  | -0.445    | -0.212   | 0.949     | 1.613    | 1.337     | 1.819  |
| A005730_01 |    | 0.064  | -0.233 | -0.883    | -0.48    | -0.85     | -0.641   | -0.742    | -0.561 |
| A005731_01 |    | 0.987  | 0.744  | -0.172    | 0.003    | -0.162    | -0.007   | -0.163    | 0.125  |
| A005732_01 |    | 0.613  | 0.46   | -0.249    | -0.053   | -0.087    | 0.216    | -0.019    | 0.328  |
| A005733_01 |    | -0.074 | 0.442  | -0.336    | -0.196   | 1.035     | 0.786    | 1.022     | 0.901  |
| A005736_01 |    | -0.196 | 0.228  | -0.065    | -0.144   | -0.042    | 0.401    | 0.608     | 0.667  |
| A005739_01 |    | -0.116 | -0.091 | -0.423    | -0.114   | -0.16     | 0.096    | -0.539    | -0.389 |
| A005740_01 |    | 0.788  | 0.636  | 0.006     | 0.286    | 0.328     | 0.659    | -0.01     | 0.501  |
| A005741_01 |    | 0.007  | 0.082  | 0.263     | 0.259    | -1.01     | -0.22    | -0.238    | -0.194 |
| A005742_01 |    | -0.918 | -0.643 | -0.517    | -0.339   | -0.742    | -0.324   | -0.189    | 0.104  |
| A005743_01 |    | 0.213  | 0.132  | -0.383    | -0.201   | 0.593     | 0.478    | 0.4       | 0.43   |
| A005744_01 |    | -0.288 | 0.033  | 0.146     | 0.135    | 0.417     | 0.461    | 0.266     | 0.209  |
| A005745_01 |    | -0.106 | -0.12  | -0.53     | -0.26    | -0.061    | -0.109   | -0.098    | -0.277 |
| A005746_01 |    | -1.399 | -1.192 | -0.628    | -0.409   | -1.358    | -0.891   | -0.73     | -0.678 |
| A005749_01 |    | -0.082 | -0.189 | -1.015    | -0.836   | -0.656    | -0.372   | -0.306    | -0.454 |
| A005750_01 | NA |        | 0.16   | -0.214 NA |          | 0.502     | 0.244 NA | NA        | NA     |
| A005751_01 |    | 0.03   | 0.27   | 0.287     | 0.448    | 0.119     | 0.548    | -0.133    | 0.074  |

|            |    |        |        |        |    |        |        |        |        |        |
|------------|----|--------|--------|--------|----|--------|--------|--------|--------|--------|
| A005754_01 |    | 0.586  | 0.458  | -0.382 | NA |        | -0.383 | -0.374 | -0.251 | 0.144  |
| A005755_01 |    | 0.933  | 0.642  | -0.486 |    | -0.136 | -0.036 | 0.083  | -0.406 | -0.017 |
| A005763_01 |    | 0.913  | 0.714  | 0.298  |    | 0.534  | 0.481  | NA     | -0.113 | 0.133  |
| A005766_01 |    | -0.244 | -0.162 | -0.141 |    | 0.065  | -0.609 | -0.31  | -0.429 | -0.205 |
| A005771_01 |    | -0.825 | -1.145 | -0.854 |    | -0.623 | -1.192 | -0.884 | -0.664 | -0.48  |
| A005782_01 | NA | NA     |        | -0.259 | NA | NA     | NA     | NA     | NA     |        |
| A005783_01 | NA | NA     |        | 0.358  |    | 0.417  | NA     |        | -0.745 | -0.659 |
| A005784_01 | NA | NA     |        | 0.193  |    | 0.205  | 0.559  | 0.383  | 0.167  | -0.083 |
| A005787_01 |    | 0.732  | 0.654  | 0.341  |    | 0.349  | 0.561  | 0.453  | 0.448  | 0.476  |
| A005792_01 |    | 0.617  | 0.387  | 0.471  |    | 0.505  | 0.283  | 0.285  | 0.184  | 0.05   |
| A005827_01 |    | 0.785  | 0.39   | -0.341 |    | -0.064 | 0.652  | 0.958  | 0.354  | 0.612  |
| A005834_01 |    | 0.651  | 0.491  | -0.015 |    | 0.158  | -0.011 | 0.152  | -0.095 | 0.21   |
| A005835_01 |    | -1.714 | -1.132 | 0.134  |    | 0.252  | -0.723 | -0.34  | -0.069 | -0.135 |
| A005839_01 |    | 0.112  | 0.423  | -0.027 |    | 0.127  | 0.633  | 0.766  | 0.683  | 0.884  |
| A005845_01 |    | -0.533 | -0.64  | -0.802 |    | -0.597 | -0.493 | -0.568 | -0.556 | -0.725 |
| A005846_01 |    | 0.339  | 0.359  | -0.169 |    | -0.033 | 0.335  | 0.584  | 0.241  | 0.541  |
| A005856_01 |    | 0.089  | -0.017 | -0.285 |    | -0.183 | -0.168 | -0.251 | -0.209 | -0.146 |
| A005864_01 |    | -0.22  | -0.05  | -0.334 |    | -0.122 | -0.685 | -0.461 | -0.546 | -0.685 |
| A005869_01 |    | 0.181  | 0.031  | -0.524 | NA |        | -0.079 | 0.192  | NA     | 0.491  |
| A005870_01 |    | 1.305  | 0.291  | 0.008  |    | 0.079  | 0.115  | 0.113  | 0.242  | 0.312  |
| A005879_01 | NA | NA     |        | 0.147  |    | 0.16   | -0.333 | NA     | -0.159 | -0.317 |
| A005885_01 |    | -0.048 | NA     | 0.009  |    | 0.119  | 0.113  | 0.114  | -0.078 | -0.021 |
| A005906_01 |    | -0.245 | -0.422 | -1.686 |    | -1.4   | 0.688  | 1.08   | 0.739  | 1.148  |
| A005910_01 |    | 0.78   | 0.78   | -0.865 |    | -0.575 | 0.059  | 0.436  | -0.009 | 0.5    |
| A005911_01 |    | 0.663  | 0.523  | 0.167  |    | 0.228  | 0.084  | 0.551  | 0.074  | 0.242  |
| A005914_01 |    | -0.22  | -0.204 | -0.475 |    | -0.365 | 0.341  | 0.291  | 0.358  | 0.508  |
| A005915_01 |    | -0.663 | -0.396 | -0.223 |    | 0.075  | -0.119 | -0.169 | 0.061  | 0.357  |
| A005916_01 |    | -0.169 | -0.229 | -1.197 |    | -0.884 | -1.357 | -1.205 | -1.059 | -0.868 |
| A005926_01 |    | 0.378  | 0.047  | -0.047 |    | 0.118  | 0.201  | 0.268  | 0.079  | 0.266  |
| A005928_01 | NA | NA     |        | 0.123  |    | 0.364  | NA     | NA     | -0.24  | 0.017  |
| A005930_01 |    | 0.112  | 0.09   | -0.275 |    | -0.009 | 0.051  | 0.141  | -0.111 | 0.082  |
| A005933_01 |    | 0.559  | 0.412  | 0.128  |    | 0.203  | 0.119  | 0.19   | 0.272  | 0.361  |
| A005935_01 |    | 0.08   | -0.061 | -0.293 |    | -0.115 | -0.375 | -0.174 | 0.058  | 0.117  |
| A005936_01 | NA | NA     |        | 0.276  |    | 0.256  | -0.105 | NA     | 0.071  | 0.081  |
| A005938_01 |    | -0.535 | -0.149 | 0.331  |    | 0.201  | -0.026 | -0.037 | 0.09   | -0.049 |
| A005939_01 |    | -0.044 | 0.13   | 0.126  |    | 0.142  | 0.111  | 0.232  | 0.144  | 0.339  |
| A005946_01 |    | -0.813 | -0.819 | -1.103 |    | -0.831 | -0.59  | -0.671 | -0.791 | -0.872 |
| A005948_01 |    | 0.07   | 0.131  | 0.112  |    | 0.165  | 0.078  | 0.299  | 0.024  | 0.229  |
| A005949_01 |    | -0.305 | -0.393 | NA     | NA |        | -0.956 | NA     | NA     | NA     |
| A005954_01 |    | -0.661 | -0.288 | 0.368  |    | 0.311  | 0.154  | 0.236  | -0.094 | -0.032 |
| A005955_01 |    | 0.043  | 0.318  | 0.141  |    | 0.366  | 0.169  | 0.41   | 0.057  | 0.188  |
| A005958_01 |    | 0.272  | -0.004 | -0.44  |    | -0.313 | -0.056 | 0.106  | 0.028  | 0.235  |
| A005959_01 |    | 0.091  | 0.46   | 0.312  |    | 0.296  | 0.14   | 0.716  | 0.245  | 0.48   |
| A005962_01 |    | -0.205 | -0.891 | 0.374  |    | 0.126  | -0.634 | -0.939 | -0.277 | -0.388 |
| A005963_01 | NA |        | -0.478 | -0.068 |    | 0.097  | -0.51  | -0.572 | -0.264 | -0.062 |
| A005965_01 |    | 0.484  | 0.629  | -0.334 |    | -0.193 | 0.385  | 0.629  | 0.324  | 0.5    |
| A005969_01 |    | 0.039  | 0.39   | 0.48   |    | 0.497  | -0.671 | -0.008 | -0.019 | 0.156  |
| A005972_01 |    | 0.326  | 0.086  | -0.257 |    | -0.261 | 0.181  | 0.29   | 0.212  | 0.341  |
| A005981_01 |    | -0.147 | 0.185  | 0.562  |    | 0.214  | 0.14   | 0.347  | 0.31   | 0.305  |
| A005984_01 |    | 0.696  | 0.47   | -1.072 | NA |        | -0.971 | NA     | -0.864 | NA     |
| A005989_01 |    | -0.417 | -0.488 | 0.037  |    | -0.089 | -1.569 | -0.929 | -0.291 | -0.738 |
| A005991_01 |    | 1.146  | 1.434  | -2.179 |    | -1.912 | 0.457  | 0.642  | 1.705  | 1.87   |
| A005992_01 |    | 0.44   | 0.492  | -0.272 |    | -0.033 | 0.19   | 0.024  | 0.147  | 0.326  |
| A005999_01 |    | 0.875  | 0.413  | -0.812 |    | -0.509 | 0.161  | 0.351  | 0.58   | 0.911  |
| A006003_01 |    | 0.488  | 0.252  | -0.025 |    | 0.17   | 0.308  | 0.313  | 0.423  | 0.523  |
| A006014_01 |    | 0.005  | 0.053  | 0.698  | NA |        | 0.071  | NA     | -0.004 | NA     |
| A006015_01 |    | 0.425  | 0.469  | 0.558  |    | 0.074  | 0.351  | 0.111  | 0.231  | 0.092  |
| A006017_01 |    | -0.265 | -0.399 | 0.051  |    | 0.048  | -0.165 | -0.188 | -0.252 | -0.205 |
| A006021_01 |    | -1.191 | -0.568 | 0.228  |    | 0.197  | -0.646 | -0.134 | 0.322  | 0.255  |
| A006022_01 |    | -0.366 | 0.318  | 0.202  |    | 0.444  | NA     | 1.413  | 0.615  | 0.943  |
| A006027_01 |    | 0.097  | 0.504  | -0.511 |    | -0.131 | -0.304 | 0.527  | 0.137  | 0.647  |
| A006030_01 |    | 0.519  | 0.631  | 0.367  |    | 0.569  | 0.166  | 0.609  | 0.173  | 0.408  |
| A006032_01 |    | -0.829 | -0.11  | 0.017  |    | 0.047  | 0.481  | 0.519  | 0.4    | 0.476  |
| A006033_01 |    | 1.015  | 0.656  | 0.265  |    | 0.364  | 0.398  | 0.313  | 0.081  | 0.289  |
| A006034_01 |    | -0.169 | 0.048  | 0.033  |    | 0.075  | -0.276 | -0.252 | -0.34  | -0.473 |
| A006035_01 |    | -0.055 | 0.216  | -0.658 |    | -0.288 | -0.341 | NA     | 0.112  | 0.246  |
| A006036_01 | NA | NA     |        | 0.162  |    | 0.218  | NA     | NA     | NA     | 0.007  |
| A006039_01 |    | 0.347  | 0.491  | 0.879  |    | 0.963  | 0.327  | 0.467  | 0.5    | 0.718  |

|               |           |           |           |          |           |           |           |        |
|---------------|-----------|-----------|-----------|----------|-----------|-----------|-----------|--------|
| A006040_01    | 0.458     | 0.099     | -0.255    | -0.439   | -0.094    | -0.365    | 0.001     | -0.251 |
| A006041_01    | -0.591    | -1.039    | -0.926    | -0.776   | -1.001    | -1.246 NA |           | -1.029 |
| A006042_01    | 0.519     | 0.257     | -0.126    | -0.081   | 0.348     | 0.254     | -0.086    | 0.104  |
| A006043_01    | 0.365     | 0.34      | -0.342    | -0.194   | 0.372     | 0.804     | 0.487     | 0.654  |
| A006045_01    | -0.227    | 0.326     | 0.262     | 0.234    | -0.199    | -0.278    | -0.032    | -0.235 |
| A006046_01    | 0.61      | 0.652     | 0.025     | 0.239    | 0.374     | 0.835     | 0.105     | 0.3    |
| A006048_01    | -0.505    | 0.11      | 0.248     | 0.385    | -0.404    | 0.137     | -0.146    | 0.068  |
| A006049_01    | -2.086    | -2.835    | -2.636    | -1.8     | -2.03     | -1.2      | -1.374    | -1.731 |
| A006050_01    | 0.258     | 0.341     | 0.493     | 0.39     | 0.593     | 0.508     | 0.026     | 0.05   |
| A006051_01    | -1.909 NA |           | -0.258    | -0.152   | -1.285    | -0.881 NA |           | -0.742 |
| A006052_01    | 0.512     | 0.402     | -0.917 NA |          | -0.015    | -0.061    | -0.265    | 0.028  |
| A006055_01    | 0.009     | -0.017    | -0.02     | -0.046   | -0.139    | -0.094    | 0.027     | 0.076  |
| A006056_01    | -0.1      | 0.357     | -0.289    | -0.2     | 0.832     | 0.824     | 0.662     | 0.694  |
| A006058_01    | -0.483 NA |           | 0.293     | 0.102    | -0.203    | -0.203    | 0.055     | -0.442 |
| A006059_01    | 0.161     | 0.055     | -0.088    | -0.012   | -0.211    | -0.166    | -0.292    | -0.107 |
| A006060_01    | -0.571    | -0.04     | -0.001    | -0.002   | 0.164     | 0.318     | 0.248     | 0.314  |
| A006063_01    | -2.427    | -2.023    | -2.489    | -2.053   | -2.46     | -1.449    | -0.384    | -0.544 |
| A006066_01    | 0.849     | 0.551     | 0.117     | 0.097 NA | NA        | NA        | NA        |        |
| A006068_01    | -0.354    | -0.006    | 0.355     | 0.222    | 0.575     | 0.357     | 0.36      | 0.207  |
| A006070_01    | -0.832 NA | NA        | NA        | NA       | NA        | NA        | -1.004 NA |        |
| A006073_01    | -0.084 NA |           | -0.159 NA |          | -0.856 NA | NA        | NA        |        |
| A006077_01 NA | NA        | NA        | 0.182 NA  |          | -0.183 NA |           | 0.049     | 0.005  |
| A006078_01    | 0.155     | -0.134    | -0.335    | -0.339   | -0.291    | -0.361    | -0.118    | -0.216 |
| A006079_01    | -0.361    | -0.184    | 0.064     | -0.007   | -0.371    | -0.246    | -0.149    | -0.175 |
| A006082_01    | 0.146     | -0.047    | -0.173    | -0.145   | -0.226    | -0.694    | -0.406    | -0.387 |
| A006085_01    | -0.762    | -0.489    | -0.198    | 0.106    | -0.104 NA | NA        |           | 0.026  |
| A006087_01    | -2.615    | -2.53     | 0.251     | 0.293    | -2.096    | -1.834    | -0.688    | -0.627 |
| A006089_01 NA |           | 0.656     | 0.505     | 0.391    | 0.602     | 0.551     | 0.573     | 0.416  |
| A006090_01    | -2.879    | -3.345 NA | NA        |          | -3.839    | -2.981 NA | NA        |        |
| A006092_01 NA | NA        | NA        | -0.189 NA | NA       | NA        | NA        | -0.578 NA |        |
| A006095_01 NA | NA        | NA        | 0.271     | 0.263    | -0.366    | -0.369    | -0.197    | -0.032 |
| A006096_01    | 0.172     | 0.12      | -0.252    | -0.203   | 0.349     | 0.135     | 0.003     | -0.005 |
| A006099_01    | -1.099    | -0.963    | 0.177     | 0.228    | -0.363    | -0.15     | -0.108    | -0.065 |
| A006100_01    | -1.052    | -1.628    | -1.361    | -1.037   | -1.692    | -1.458    | -1.144    | -1.045 |
| A006101_01    | 0.451     | 0.465     | 0.2       | 0.392    | 0.031     | 0.275     | -0.176    | 0.218  |
| A006102_01    | 1.162     | 0.888     | -0.049 NA |          | 0.663     | 0.315     | 0.694     | 0.469  |
| A006104_01 NA | NA        | NA        | 0.085     | 0.113 NA | NA        |           | -1.352    | -1.751 |
| A006105_01    | -0.657    | -0.162    | 0.654     | 0.548    | 0.245     | 0.233     | 0.162     | 0.064  |
| A006110_01    | 0.723     | 0.475     | 0.083     | 0.109    | -0.176    | 0.032     | 0.022     | 0.032  |
| A006118_01    | 0.207     | 0.166     | 0.136     | 0.15     | 0.079     | 0.126     | -0.131    | -0.084 |
| A006119_01    | 0.397     | 0.074     | 0.261     | 0.132    | 0.012     | 0.019     | 0.097     | 0.101  |
| A006123_01    | -0.162    | -0.055    | 0.162     | 0.262    | 0.101     | 0.178     | 0.31      | 0.178  |
| A006124_01    | 0.393     | 0.313     | -0.013    | 0.191    | 0.129     | 0.354     | 0.147     | 0.461  |
| A006125_01    | -0.247    | -0.345    | -0.251    | -0.294   | -0.428    | -0.244    | 0         | -0.14  |
| A006126_01    | 0.974     | 0.478     | -0.638    | -0.491   | -0.288    | -0.434    | -0.227    | -0.354 |
| A006132_01    | 0.233     | 0.348     | -0.196 NA |          | 0.067     | 0.215 NA  | NA        |        |
| A006136_01    | 0.331     | 0.19 NA   | NA        |          | -0.275 NA | NA        | NA        |        |
| A006138_01    | 0.491     | 0.416     | 0.027     | 0.06     | 0.369     | 0.352     | 0.256     | 0.223  |
| A006143_01    | 0.11      | 0.266     | -0.156    | -0.114   | 0.191     | 0.13      | 0.324     | 0.295  |
| A006146_01    | 0.169     | 0.138     | 0.035     | -0.027   | -0.131    | -0.097    | 0.199     | 0.15   |
| A006152_01    | 0.202     | 0.158     | 0.167     | 0.063    | 0.091     | 0.191     | 0.355     | 0.182  |
| A006159_01    | 0.304     | 0.303     | 0.216     | 0.293    | 0.021     | 0.098     | 0.051     | 0.155  |
| A006163_01    | -0.017    | -0.106    | -0.378    | -0.181   | -0.225    | -0.236    | -0.221    | -0.184 |
| A006164_01    | -0.443    | -0.248    | 0.068     | 0.134    | -0.101    | -0.358    | 0.002     | -0.019 |
| A006168_01    | -0.158    | -0.147    | -0.207    | -0.123   | -0.148    | -0.358    | -0.199    | -0.322 |
| A006169_01    | 0.367     | 0.462     | -0.276    | -0.126   | -0.583    | -0.178    | -0.369    | -0.025 |
| A006172_01 NA | NA        | NA        | 0.241     | 0.109 NA |           | 0.143     | 0.335     | 0.274  |
| A006173_01    | 0.298 NA  |           | 0.071     | -0.034   | 0.02 NA   |           | 0.289 NA  |        |
| A006175_01    | 0.638     | 0.625     | 0.143     | 0.209    | 0.309     | 0.496     | 0.208     | 0.222  |
| A006177_01 NA | NA        | NA        | 0.284     | 0.373 NA | NA        | NA        |           | 0.33   |
| A006178_01    | 0.31      | 0.267     | -0.115    | -0.041   | 0.416     | 0.154     | 0.092     | 0.108  |
| A006181_01    | -1.47     | -1.795    | -1.464    | -1.198   | -1.495    | -1.352    | -0.96     | -1.322 |
| A006182_01    | -0.063    | 0.011     | 0.176     | 0.168    | -0.576    | -0.449    | -0.29     | -0.252 |
| A006185_01    | 0.223     | 0.29      | -0.153    | -0.025   | 0.265     | 0.486     | 0.761     | 0.65   |
| A006189_01    | -0.291    | -0.331    | -0.219    | -0.113   | -0.047    | -0.106    | -0.214    | -0.342 |
| A006191_01    | -1.09     | -0.627    | 0.119     | -0.052   | -0.375    | -0.119    | 0.047     | -0.142 |
| A006193_01    | 0.274     | 0.246     | 0.493     | 0.206    | 0.268     | 0.086     | 0.365     | 0.216  |
| A006195_01    | 1.019     | 0.777     | 0.322     | 0.413    | -0.236    | -0.116    | 0.122     | 0.479  |

|               |           |          |           |           |           |          |           |        |
|---------------|-----------|----------|-----------|-----------|-----------|----------|-----------|--------|
| A006197_01    | 0.594     | 0.76     | -0.05     | 0.009     | 0.791     | 0.88     | 0.887     | 0.796  |
| A006199_01    | 0.334     | 0.318    | 0.14      | 0.217     | 0.198     | 0.278    | 0.144     | 0.237  |
| A006202_01    | -1.179    | -0.973   | -0.818    | -0.781    | -0.855    | -1.001   | -0.507    | -0.695 |
| A006203_01    | 0.736     | 0.65     | 0.045 NA  |           | 0.202 NA  | NA       | NA        |        |
| A006211_01    | 0.307     | 0.456    | -0.197    | 0.016     | 0.238     | 0.366    | 0.482     | 0.764  |
| A006212_01    | 0.359     | 0.335    | -0.33     | -0.338    | -0.301    | -0.146   | -0.069    | 0.042  |
| A006214_01 NA | NA        |          | 1.013     | 0.533 NA  |           | 0.284    | 0.299 NA  |        |
| A006219_01 NA | NA        |          | 0.247     | 0.045 NA  |           | 0.266    | 0.395     | 0.284  |
| A006220_01    | -0.082    | 0.088    | -0.063    | 0.213     | -0.141    | -0.034   | -0.343    | 0.067  |
| A006223_01    | -0.038 NA |          | 0.019 NA  |           | -0.351 NA |          | -0.053    | -0.019 |
| A006226_01    | -0.21     | -0.586   | -0.605    | -0.423    | -1.082    | -1.07 NA |           | -0.773 |
| A006227_01 NA | NA        | -0.064   | -0.812    | -0.581    | 0.189     | 0.264    | 0.127     | 0.042  |
| A006231_01    | -0.102    | 0.121    | 0.23      | 0.235     | -0.092    | 0.086 NA |           | 0.108  |
| A006233_01 NA | NA        |          | -0.483    | -0.318    | -0.908 NA | NA       |           | -0.621 |
| A006235_01    | 0.308     | 0.316    | 0.456     | 0.602     | 0.818     | 0.782    | 0.444     | 0.67   |
| A006239_01 NA | NA        |          | -0.086    | 0.018     | -0.888 NA |          | -0.795    | -0.682 |
| A006242_01 NA | NA        |          | -0.164 NA | NA        | NA        | NA       | NA        |        |
| A006243_01    | -0.976    | -0.549   | 0.05      | 0.012     | -0.382    | -0.396   | -0.294    | -0.5   |
| A006246_01    | -1.461    | -0.834   | -0.386    | -0.352    | -0.064    | 0.198    | 0.449     | 0.547  |
| A006251_01 NA |           | -0.235   | -0.269    | -0.126    | -0.731 NA |          | -0.596    | -0.464 |
| A006252_01    | 0.32      | 0.306    | 0.106     | 0.189     | -0.081 NA |          | -0.073    | -0.071 |
| A006253_01    | -0.608    | -0.182   | 0.537     | 0.273     | 0.458     | 0.533    | 0.225     | 0.115  |
| A006254_01    | -1.314    | -0.618   | 0.08      | 0.093     | -0.873    | -0.529   | -0.378    | -0.255 |
| A006257_01    | 0.61      | 0.482    | 0.017     | 0.001     | 0.114     | -0.049   | 0.012     | 0.034  |
| A006260_01    | -0.55     | -0.363   | 0.761     | 0.529     | 0.043     | 0.053    | -0.134    | -0.184 |
| A006261_01    | 0.033     | 0.172    | 0.497     | 0.283     | 0.155     | 0.108    | 0.352     | 0.244  |
| A006263_01    | 0.234     | 0.042    | -0.155    | -0.13     | 0.034     | 0.123    | 0.121     | 0.149  |
| A006264_01    | 0.278     | 0.366    | 0.548     | 0.479     | 1.163     | 1.046    | 0.946     | 0.84   |
| A006269_01    | 0.857     | 0.616    | 0.186     | 0.184     | -0.106    | -0.122   | 0.225     | 0.122  |
| A006273_01    | -0.242    | 0.274    | 0.292     | 0.309     | 0.232     | 0.427    | 0.407     | 0.47   |
| A006277_01 NA | NA        |          | -0.145    | 0.2 NA    | NA        |          | 0.058 NA  |        |
| A006278_01 NA | NA        |          | -0.233    | -0.148 NA | NA        |          | 0.082     | 0.166  |
| A006282_01    | 0.564     | 0.522    | -0.612    | -0.374    | 0.605     | 0.503    | 0.302     | 0.427  |
| A006284_01    | 0.37      | 0.198 NA | NA        |           | -1.096    | -0.812   | -0.406 NA |        |
| A006288_01    | 0.055     | -0.331   | -0.404    | 0.003     | -1.026    | -0.947   | -0.681    | -0.291 |
| A006291_01 NA | NA        |          | -0.22     | 0.071 NA  | NA        |          | -0.821    | -0.503 |
| A006298_01    | 0.557 NA  |          | -0.365    | -0.25     | -0.021 NA |          | -0.184    | 0.18   |
| A006313_01    | 0.495     | 0.476    | 0.228     | 0.34      | 0.253     | 0.649    | 0.485     | 0.821  |
| A006316_01 NA | NA        |          | -0.269 NA | NA        | NA        |          | 0.371 NA  |        |
| A006323_01    | 0.488     | 0.507    | -0.074    | -0.095    | 0.524     | 0.507    | 0.193     | 0.263  |
| A006324_01    | 0.326     | 0.035    | 0.243     | 0.272     | -0.061    | 0.054    | -0.075    | -0.101 |
| A006327_01    | 0.116     | 0.337    | -0.307    | -0.223    | 0.069     | 0.16 NA  |           | 0.286  |
| A006329_01    | 0.436     | 0.392    | 0.465     | 0.379     | 0.715     | 0.741    | 0.914     | 0.925  |
| A006330_01 NA | NA        |          | -0.059    | 0.294 NA  | NA        |          | -0.051    | 0.009  |
| A006331_01 NA | NA        | 0.342    | -0.063    | 0.038 NA  | NA        |          | -0.169    | -0.083 |
| A006342_01 NA | NA        |          | 0.223     | 0.311     | -0.09 NA  |          | -0.253    | -0.097 |
| A006345_01    | -0.152    | 0.067    | -0.786    | -0.549    | 0.048     | 0.099    | -0.366    | -0.34  |
| A006350_01    | 0.791     | 0.669    | 0.242     | 0.256     | 0.348     | 0.336    | 0.206     | 0.417  |
| A006351_01    | 0.492     | 0.299    | 0.184     | 0.125 NA  |           | -0.065   | -0.248    | -0.018 |
| A006357_01    | 0.635     | 0.388    | -0.048    | -0.063    | 0.229     | -0.031   | 0.018     | 0.037  |
| A006373_01    | -1.041 NA |          | 0.36      | 0.414     | -0.196 NA |          | -0.003    | 0.09   |
| A006374_01    | 0.48      | 0.318    | -0.512    | -0.126    | -0.226    | -0.007   | -0.212    | 0.348  |
| A006378_01 NA | NA        |          | 0.094     | 0.172     | 0.121     | 0.208    | -0.026    | 0.037  |
| A006384_01    | -0.244    | -0.035   | -0.663    | -0.415    | 0.086     | 0.322    | 0.271     | 0.527  |
| A006385_01    | 0.538     | 0.222    | -0.29     | -0.203    | 0.122     | 0.038    | 0.064     | 0.277  |
| A006387_01    | 0.524     | 0.58     | 0.011     | -0.031    | 0.742     | 0.492    | 0.55      | 0.589  |
| A006388_01    | 0.16      | 0.123    | -0.744    | -0.567    | -0.939    | -0.673   | -0.417    | -0.284 |
| A006389_01    | 1.116     | 0.947    | -0.145    | 0.009     | 0.311     | 0.142    | 0.142     | 0.366  |
| A006400_01    | -0.213    | -0.369   | -0.268    | -0.031    | -0.887    | -1.189   | -0.848    | -0.737 |
| A006402_01    | -0.31     | -0.336   | -0.351    | -0.201    | -0.386    | -0.238   | -0.373    | -0.314 |
| A006419_01 NA | NA        |          | -0.748 NA | NA        | NA        |          | -0.442 NA |        |
| A006421_01    | -0.86     | -0.295   | 0.275     | 0.359     | -0.577    | -0.09    | -0.256    | -0.109 |
| A006422_01 NA | NA        |          | 0.618     | 0.525 NA  | NA        |          | 0.197     | 0.205  |
| A006429_01    | 0.949     | 0.55     | 0.589     | 0.594 NA  | NA        |          | 0.208 NA  |        |
| A006432_01 NA | NA        |          | 0.069     | 0.072     | -0.431    | -0.293   | 0.258     | 0.144  |
| A006436_01    | -0.627    | -0.291   | 0.337     | 0.249     | -0.115    | -0.077   | -0.089    | -0.19  |
| A006441_01 NA | NA        | 0.126    | 0.17      | 0.184     | 1.604     | 1.485    | 1.255     | 1.419  |
| A006442_01    | -0.337    | -0.067   | 0.398     | 0.524     | -0.288    | 0.055    | 0.111     | 0.289  |

|            |    |           |          |           |           |        |         |           |        |
|------------|----|-----------|----------|-----------|-----------|--------|---------|-----------|--------|
| A006451_01 |    | 0.626     | 0.354    | -0.344    | -0.255    | 0.143  | 0.228   | 0.044     | 0.392  |
| A006453_01 |    | 0.475     | 0.288    | -0.064    | 0.088     | 0.409  | 0.512   | 0.046     | 0.333  |
| A006456_01 |    | 0.892     | 0.722 NA |           | -1.171    | -0.195 | -0.085  | 0.064     | 0.473  |
| A006491_01 |    | 0.39      | 0.271    | -0.023    | 0.046     | 0.251  | 0.17    | 0.442     | 0.526  |
| A006523_01 |    | 0.505     | 0.318    | -0.221    | -0.001    | -0.111 | 0.075   | -0.03     | 0.291  |
| A006529_01 | NA | NA        |          | -0.233 NA | NA        | NA     |         | 0.336     | 0.447  |
| A006550_01 |    | 0.472     | 0.315    | 0.087     | 0.078     | 0.424  | 0.33    | 0.353     | 0.273  |
| A006556_01 |    | 0.442     | 0.249    | -0.655    | -0.444    | 0.261  | 0.146   | -0.171    | 0.009  |
| A006564_01 |    | 0.661     | 0.463    | 0.041     | 0.279     | 0.562  | 0.49 NA |           | 0.344  |
| A006565_01 |    | 0.742     | 0.433    | 0.135     | 0.305     | 0.472  | 0.382   | 0.411     | 0.622  |
| A006567_01 |    | 0.966     | 0.941    | 0.2       | 0.346     | 1.214  | 1.173   | 0.504     | 0.731  |
| A006568_01 |    | 0.045     | 0.305    | 0.109     | 0.239     | 0.541  | 0.609   | 0.584     | 0.635  |
| A006569_01 |    | 0.251     | 0.2      | -0.222    | -0.14     | 0.339  | 0.17    | 0.214     | 0.243  |
| A006573_01 |    | 0.606     | 0.433    | -0.407    | -0.088    | 0.075  | 0.205   | -0.083    | 0.285  |
| A006574_01 |    | 0.807     | 0.615    | -0.321    | 0.017     | 0.339  | 0.465   | -0.034    | 0.468  |
| A006575_01 |    | 0.706     | 0.533    | -0.097    | 0.14      | 0.406  | 0.495   | -0.16     | 0.336  |
| A006579_01 |    | -0.46     | -0.538   | -0.729    | -0.451    | -0.591 | -0.689  | -0.283    | -0.599 |
| A006580_01 |    | 0.252     | 0.046    | -0.127    | -0.052    | 0.113  | 0.22    | 0.024     | -0.039 |
| A006581_01 |    | 0.051     | 0.211    | -0.309    | -0.281    | 0.216  | 0.037   | -0.05     | -0.133 |
| A006585_01 |    | 0.493     | 0.699    | -0.557    | -0.045    | 0.194  | 0.701   | 0.19      | 0.929  |
| A006586_01 |    | 0.614     | 0.549    | -0.317    | -0.007    | 0.226  | 0.564   | 0.19      | 0.536  |
| A006595_01 |    | 0.139     | 0.217    | 0.171 NA  |           | 0.672  | 0.866   | 0.617     | 0.835  |
| A006596_01 |    | 0.847     | 1.092    | -0.572    | -0.22     | 1.029  | 1.733   | 0.865     | 1.507  |
| A006597_01 |    | 1.059     | 1.013    | -0.424    | -0.143    | 0.749  | 1.392   | 0.638     | 0.925  |
| A006598_01 |    | 0.96      | 0.914    | -0.443 NA |           | 0.566  | 1.21 NA |           | 0.8    |
| A006603_01 |    | -0.671    | -0.348   | -0.067    | 0.17      | -0.303 | -0.164  | -0.103    | 0.083  |
| A006610_01 |    | 0.321     | 0.079    | 0.194     | 0.249     | -0.253 | -0.222  | 0.076     | 0.067  |
| A006611_01 |    | 0.309     | 0.35     | 0.474     | 0.502     | 0.51   | 0.466   | 0.335     | 0.401  |
| A006619_01 |    | -0.207    | -0.213   | 0.218     | 0.13      | -0.065 | -0.237  | -0.06     | -0.078 |
| A006622_01 |    | 0.751     | 0.706    | 0.585     | 0.534     | 0.957  | 0.736   | 0.264     | 0.347  |
| A006637_01 |    | -0.116    | -0.291   | -1.13     | -0.681    | -0.249 | -0.262  | 0.123     | 0.477  |
| A006660_01 | NA | NA        |          | -0.376 NA | NA        | NA     | NA      |           | 0.419  |
| A006664_01 |    | 0.137     | 0.096    | -0.649    | -0.353    | 0.111  | 0.184   | 0.139     | 0.471  |
| A006665_01 |    | -1.418    | -1.059   | 0.216     | 0.036     | -0.482 | -0.39   | 0.018     | -0.156 |
| A006674_01 | NA | NA        |          | -0.008 NA | NA        | NA     | NA      | -0.026 NA |        |
| A006676_01 | NA | NA        |          | -0.282    | -0.102 NA | NA     | NA      | -0.114    | 0      |
| A006681_01 |    | 0.554     | 0.422    | -0.06     | 0.069     | 0.494  | 0.441   | 0.399     | 0.404  |
| A006684_01 |    | 0.422     | 0.061    | -0.33     | -0.252    | -0.185 | -0.207  | -0.093    | -0.07  |
| A006688_01 |    | -0.693    | -0.342   | -0.326    | -0.118    | -0.437 | -0.44   | -0.384    | -0.365 |
| A006689_01 |    | 0.661     | 0.354    | -0.013    | 0.116     | 0.42   | 0.355   | 0.09      | 0.303  |
| A006692_01 |    | 0.01      | -0.191   | 0.186     | 0.077     | 0.434  | 0.302   | 0.427     | 0.301  |
| A006694_01 |    | -0.486 NA |          | 0.045     | -0.079    | 0.168  | 0.333   | 0.092     | 0.067  |
| A006696_01 |    | -0.289    | 0.117    | 0.144     | 0.064     | 0.501  | 0.381   | 0.277     | 0.132  |
| A006708_01 |    | -0.875    | -0.719   | 0.111     | 0.113     | -0.384 | -0.296  | -0.112    | -0.165 |
| A006710_01 |    | 0.418     | 0.364    | 0.351     | 0.4       | 0.473  | 0.612   | 0.417     | 0.536  |
| A006715_01 |    | 0.274     | -0.058   | -0.037    | 0.059     | 0.161  | 0.081   | 0.078     | 0.012  |
| A006716_01 |    | -1.172    | -1.377   | -1.858    | -1.763    | -1.283 | -1.566  | -0.997    | -1.136 |
| A006724_01 |    | -0.04     | -0.024   | -0.245    | -0.199    | -0.59  | -0.458  | -0.216    | -0.359 |
| A006726_01 | NA | NA        |          | -0.151    | -0.059    | -1.126 | -0.654  | -0.347    | -0.298 |
| A006730_01 |    | -0.318    | -0.574   | 0.046     | 0.188     | -0.731 | -0.793  | -0.273    | -0.051 |
| A006733_01 |    | 0.675     | 0.391    | -0.32     | -0.255    | 0.522  | 0.506   | 0.726     | 0.671  |
| A006735_01 |    | -0.127 NA |          | 0.124 NA  |           | 0.14   | 0.033   | 0.253     | 0.103  |
| A006736_01 |    | 0.223     | 0.787    | 0.709     | 0.861     | 0.436  | 0.862   | 0.474     | 0.832  |
| A006737_01 |    | -0.523    | -0.35    | 0.152     | 0.094     | 0.002  | -0.092  | 0.072     | -0.04  |
| A006738_01 |    | 0.101     | 0.262    | 0.094     | 0.105     | -0.131 | 0.033   | -0.098    | -0.106 |
| A006742_01 |    | -0.414 NA |          | 0.011     | 0.161     | -0.39  | -0.29   | -0.493    | -0.543 |
| A006744_01 |    | -0.22     | 0.028    | -0.222    | -0.221    | -0.104 | 0.003   | -0.11     | -0.156 |
| A006748_01 |    | 0.259     | 0.026    | -0.497    | -0.375    | 0.241  | -0.046  | -0.035    | -0.097 |
| A006754_01 |    | 0.62      | 0.53     | 0.207     | 0.262     | 0.002  | 0.252   | 0.075     | 0.097  |
| A006755_01 | NA | NA        |          | -0.343 NA | NA        | NA     | NA      |           | -0.05  |
| A006761_01 |    | 0.928     | 0.865    | -0.153    | -0.022    | 0.663  | 0.817   | 0.182     | 0.45   |
| A006763_01 | NA | NA        |          | 0.034     | 0.357 NA  | NA     | NA      | -0.217    | -0.199 |
| A006769_01 |    | -0.765    | -0.36    | -0.479    | -0.395    | 0.304  | 0.106   | 0.057     | 0.069  |
| A006771_01 |    | -0.238    | 0.285    | 0.457     | 0.573     | 0.57   | 0.619   | 0.432     | 0.711  |
| A006781_01 |    | -0.975 NA |          | 0.336     | 0.233     | -1.002 | -1.155  | -0.82     | -0.838 |
| A006787_01 | NA | NA        |          | 0.532     | 0.548 NA  |        | 0.228   | -0.05     | -0.14  |
| A006789_01 |    | 0.915     | 0.695    | -0.215    | -0.376    | -0.178 | -0.36   | -0.068    | -0.185 |
| A006790_01 | NA | NA        |          | -0.141    | -0.149 NA | NA     | NA      | -0.062    | -0.176 |

|            |    |           |          |           |           |           |           |        |        |
|------------|----|-----------|----------|-----------|-----------|-----------|-----------|--------|--------|
| A006794_01 |    | 0.046     | 0.091    | 0.064     | 0.194     | 0.02      | 0.003     | 0.034  | 0.147  |
| A006797_01 |    | -0.35     | -0.205   | 0.134     | 0.177     | 0.068     | -0.068    | 0.034  | 0.045  |
| A006799_01 | NA |           | 0.057    | 0.119     | 0.322     | 0.858     | 0.725     | 0.198  | 0.421  |
| A006800_01 | NA | NA        |          | 0.643     | 0.596 NA  | NA        |           | 0.082  | 0.009  |
| A006802_01 |    | 1.257     | 1.027    | -0.821    | -0.61     | -0.372    | -0.882    | -1.089 | -0.921 |
| A006803_01 |    | -0.082    | 0.201    | -0.089    | -0.08     | 0.037     | 0.172     | 0.251  | 0.244  |
| A006804_01 |    | -0.78     | -0.076   | -0.101    | 0.097     | 0.107     | 0.169     | -0.125 | 0.114  |
| A006805_01 |    | 0.608     | 0.413    | -0.21     | -0.074    | 0.047     | 0.155     | -0.005 | 0.162  |
| A006806_01 |    | 0.69      | 0.517    | 0.049     | 0.042     | 0.591     | 0.305     | 0.298  | 0.317  |
| A006808_01 |    | 0.521     | 0.529    | -0.467    | -0.139    | 0.278     | 0.365     | 0.253  | 0.366  |
| A006809_01 |    | 0.659     | 0.257    | -0.534 NA |           | 0.215     | -0.002 NA | NA     |        |
| A006811_01 |    | 0.216     | 0.529    | 0.176     | 0.208     | 0.075     | 0.453     | 0.366  | 0.295  |
| A006815_01 |    | -0.205    | -0.164   | -0.166    | -0.106    | -0.101    | -0.148    | 0.004  | -0.284 |
| A006816_01 |    | -0.404    | -0.168   | -0.377    | -0.181    | -0.088    | 0.105     | -0.114 | 0.051  |
| A006817_01 |    | 0.067     | 0.495    | 0.11      | 0.263     | -0.052    | 0.3       | 0.167  | 0.461  |
| A006819_01 |    | 0.178     | 0.261    | 0.088     | 0.095     | 0.096     | 0.08      | 0.077  | 0.131  |
| A006821_01 |    | -0.047    | -0.104   | -0.053    | -0.035    | -0.071    | 0.009     | -0.071 | -0.179 |
| A006822_01 |    | 0.112     | 0.446    | -0.022    | -0.006    | 0.296 NA  |           | 0.384  | 0.132  |
| A006824_01 |    | -1.818    | -2.168   | -2.931    | -2.462    | -1.766    | -1.288    | -1.487 | -2.059 |
| A006826_01 |    | 0.075     | 0.342    | -0.399    | -0.21     | 0.647     | 1.269     | 0.689  | 1.062  |
| A006827_01 | NA |           | -0.376   | -0.56     | -0.403    | -0.494    | -0.41     | -0.718 | -0.74  |
| A006828_01 |    | 0.732     | 0.533    | 0.1       | 0.028     | 0.437     | 0.515     | 0.445  | 0.524  |
| A006829_01 |    | -0.298    | -0.099   | 0.396     | 0.404     | 0.374     | 0.259     | 0.03   | -0.096 |
| A006830_01 |    | 0.505     | 0.246    | 0.192     | 0.507     | 0.656     | 0.748     | 0.738  | 0.723  |
| A006831_01 |    | 0.033     | -0.157   | -0.217 NA |           | 0.006     | 0.044     | 0.294  | 0.5    |
| A006832_01 |    | 0.035     | 0.017    | 0.122     | 0.294     | -0.158    | -0.067    | -0.311 | -0.24  |
| A006847_01 |    | -0.691    | -1.225   | -2.141 NA | NA        |           | -1.43     | -0.84  | -0.698 |
| A006849_01 |    | -0.083    | -0.017   | -0.87     | -0.561    | 0.058     | 0.084     | 0.28   | 0.51   |
| A006850_01 |    | 0.445     | 0.407    | -0.266    | 0.099     | 0.472     | 0.348 NA  |        | 0.25   |
| A006852_01 |    | -0.319 NA |          | -0.137    | -0.173    | 0.36      | 0.231     | 0.306  | 0.201  |
| A006854_01 |    | 0.276     | 0.295    | 0.479     | 0.395     | 0.334     | 0.177     | 0.428  | 0.226  |
| A006857_01 |    | 0.357     | -0.006   | -0.041    | 0.142     | 0.08 NA   |           | -0.188 | -0.177 |
| A006864_01 |    | 0.37      | -0.01    | -0.395    | -0.102    | 0.025     | -0.056    | -0.059 | 0.083  |
| A006867_01 |    | 0.453     | 0.23     | 0.015     | 0.032     | 0.326     | 0.314     | 0.073  | 0.091  |
| A006868_01 |    | 0.53      | 0.726    | -0.062    | 0.539 NA  |           | 0.872 NA  |        | 0.648  |
| A006869_01 |    | 0.001     | 0.126    | 0.208     | 0.04      | 0.141     | -0.058    | 0.099  | -0.025 |
| A006871_01 |    | 0.366     | 0.21     | -0.105    | -0.02     | 0.183     | 0.191     | 0.346  | 0.353  |
| A006876_01 |    | -0.299    | 0.11     | -0.086    | -0.025    | -0.313    | -0.008    | 0.015  | 0.117  |
| A006880_01 |    | -0.33     | -0.324   | -0.365    | -0.229    | -0.425    | -0.184    | -0.122 | -0.049 |
| A006882_01 |    | 0.175     | 0.221    | -0.024    | 0.094     | -0.322    | -0.146    | -0.129 | -0.151 |
| A006885_01 |    | -0.376    | -0.013   | 0.621     | 0.685     | 0.034     | 0.533     | 0.35   | 0.495  |
| A006890_01 | NA | NA        |          | 0.308     | 0.24 NA   | NA        |           | -0.048 | -0.214 |
| A006893_01 |    | -0.163    | 0.042    | 0.4       | 0.555     | 0.417     | 0.796     | 0.648  | 0.689  |
| A006896_01 |    | -0.133    | -0.183   | -0.246    | -0.076    | -0.288    | -0.212    | -0.017 | 0.073  |
| A006897_01 | NA |           | 0.359    | -0.05     | 0.001     | 0.213     | 0.527     | -0.024 | 0.045  |
| A006907_01 |    | 0.12      | 0.066    | 0.081     | 0.185     | -0.188    | -0.059    | 0.004  | 0.036  |
| A006913_01 |    | 0.041     | 0.483 NA |           | -1.066    | -0.59     | 0.019     | -0.203 | 0.108  |
| A006918_01 |    | 0.296     | 0.092    | 0.048     | 0.113     | -0.089    | -0.024    | 0.215  | 0.094  |
| A006919_01 |    | -0.133    | 0.074 NA |           | 0.011     | 0.632     | 0.564     | 0.713  | 0.811  |
| A006924_01 |    | -0.176 NA |          | 0.239     | 0.345     | -0.138    | 0.058     | -0.159 | 0.108  |
| A006928_01 |    | -1.042    | -0.792   | -1.044 NA |           | -0.384 NA | NA        | NA     |        |
| A006935_01 |    | -1.379    | -1.14    | -0.949    | -0.7      | -0.822    | -0.515    | -0.317 | -0.392 |
| A006937_01 |    | -0.039    | 0.086    | 0.242     | 0.265     | 0.075     | 0.154     | -0.019 | 0.049  |
| A006944_01 |    | 0.195     | 0.527    | 0.489     | 0.587     | 0.712     | 0.892     | 0.21   | 0.421  |
| A006948_01 |    | -0.114    | -0.228   | -0.751    | -0.574    | -0.239    | -0.36     | -0.001 | -0.033 |
| A006949_01 | NA | NA        |          | -0.706    | -0.429 NA |           | -0.438    | -0.501 | -0.422 |
| A006954_01 |    | 0.366     | 0.23     | 0.354     | 0.354     | 0.297     | 0.547     | 0.104  | 0.429  |
| A006959_01 | NA | NA        |          | -0.788    | -0.416 NA | NA        |           | -0.563 | -0.665 |
| A006971_01 | NA | NA        |          | -0.173    | -0.141 NA | NA        |           | 0.187  | 0.119  |
| A006972_01 | NA | NA        |          | 0.272     | 0.172     | -0.397 NA |           | -0.403 | -0.492 |
| A006974_01 | NA | NA        |          | 0.319     | 0.344     | 0.243     | 0.358     | 0.575  | 0.8    |
| A006975_01 |    | -0.356    | 0.014    | 0.566     | 0.583     | 0.448     | 0.955     | 0.672  | 1.035  |
| A006984_01 |    | -0.24     | -0.257   | -0.103    | -0.084    | -0.475    | -0.435    | -0.221 | -0.407 |
| A006988_01 |    | -0.604    | -0.574   | -0.042    | 0.029     | -0.686    | -0.703    | -0.327 | -0.271 |
| A006992_01 |    | -0.473    | -0.423   | -0.021    | -0.148    | -0.331    | -0.206    | -0.106 | -0.316 |
| A007000_01 |    | 0.485     | 0.363    | 0.529     | 0.396     | 0.521     | 0.64      | 0.442  | 0.489  |
| A007002_01 | NA | NA        |          | 0.167     | 0.236 NA  | NA        |           | -0.035 | -0.078 |
| A007010_01 | NA |           | 0.15     | -0.072 NA | NA        |           | 0.176 NA  |        | 0.26   |

|            |        |        |        |        |        |        |        |        |        |
|------------|--------|--------|--------|--------|--------|--------|--------|--------|--------|
| A007017_01 | NA     |        | 0.313  | 0.173  | 0.116  | 0.958  | 0.727  | 0.523  | 0.499  |
| A007021_01 |        | -0.019 | -0.172 | -0.101 | 0.001  | -0.27  | -0.17  | -0.011 | 0.088  |
| A007023_01 |        | -0.772 | -0.494 | 0.023  | 0.043  | -0.795 | -0.581 | -0.397 | -0.496 |
| A007045_01 |        | -0.093 | 0.033  | 0.029  | NA     | 0.255  | 0.008  | 0.298  | 0.355  |
| A007051_01 | -0.824 | NA     | NA     | NA     | NA     | -1.199 | NA     | NA     | NA     |
| A007052_01 | 0.134  |        | 0.196  | 0.05   | NA     | 0.337  | 0.523  | 0.467  | 0.541  |
| A007054_01 | -0.875 | NA     |        | -0.651 | -0.635 | -0.812 | -0.604 | -0.366 | -0.513 |
| A007058_01 | 0.781  |        | 0.583  | 0.224  | 0.326  | 0.313  | 0.331  | 0.222  | 0.1    |
| A007061_01 | -0.381 |        | -0.847 | -1.292 | -0.961 | -1.184 | -1.139 | -1.22  | -1.126 |
| A007062_01 | NA     | NA     |        | 0.213  | 0.104  | NA     | NA     | 0.247  | 0.066  |
| A007064_01 | 0.161  |        | 0.119  | -0.769 | -0.589 | -0.663 | -0.575 | -0.827 | -0.768 |
| A007067_01 | 0.421  |        | 0.131  | -0.018 | 0.03   | -0.028 | 0.161  | 0.082  | 0.209  |
| A007073_01 | -0.281 |        | -0.299 | -0.637 | -0.445 | 0.18   | 0.198  | -0.227 | -0.178 |
| A007075_01 | 0.486  |        | 0.58   | 0.37   | 0.203  | -0.021 | 0.057  | 0.044  | 0.053  |
| A007087_01 | NA     | NA     |        | 0.743  | 0.503  | NA     | NA     | 0.005  | -0.243 |
| A007090_01 | 0.205  |        | 0.06   | 0.274  | 0.26   | 0.211  | 0.448  | 0.208  | 0.369  |
| A007093_01 | 0.174  |        | 0.217  | 0.09   | 0.021  | -0.096 | 0.048  | -0.058 | -0.175 |
| A007098_01 | -0.46  | NA     |        | 0.194  | NA     | -0.163 | 0.226  | 0.043  | NA     |
| A007103_01 | 0.402  |        | 0.214  | 0.022  | 0.095  | -0.208 | -0.133 | -0.111 | -0.098 |
| A007112_01 | -0.288 |        | -0.006 | 0.37   | 0.304  | 0.305  | 0.175  | 0.27   | 0.102  |
| A007117_01 | -0.616 | NA     |        | 0.553  | 0.515  | -0.029 | NA     | -0.118 | -0.133 |
| A007119_01 | 0.052  |        | 0.447  | 0.286  | 0.079  | -0.033 | NA     | 0.006  | -0.083 |
| A007130_01 | -0.462 |        | -0.239 | 0.089  | 0.086  | -0.524 | -0.415 | -0.237 | -0.393 |
| A007131_01 | NA     | NA     |        | 0.281  | 0.251  | NA     | NA     | 0.156  | 0.053  |
| A007132_01 | 0.135  | NA     |        | 0.279  | 0.286  | 0.254  | NA     | 0.011  | -0.032 |
| A007142_01 | 0.493  |        | 0.235  | -0.026 | 0.059  | -0.262 | -0.317 | -0.209 | -0.204 |
| A007148_01 | 0.09   |        | 0.363  | 0.406  | 0.367  | 0.82   | 0.814  | 0.327  | 0.394  |
| A007152_01 | NA     | NA     |        | 0.042  | -0.047 | NA     | NA     | -0.322 | -0.412 |
| A007153_01 | 0.195  |        | 0.094  | 0.141  | 0.017  | 0.234  | 0.06   | 0.154  | 0.045  |
| A007158_01 | 0.44   | NA     |        | 0.098  | 0.005  | NA     | 0.17   | 0.085  | 0.019  |
| A007167_01 | -0.477 |        | 0.084  | -0.046 | -0.145 | 0.454  | 0.394  | 0.616  | 0.632  |
| A007169_01 | -0.275 | NA     |        | 0.069  | -0.203 | NA     | -0.187 | 0.082  | -0.284 |
| A007170_01 | NA     |        | 0.229  | -0.156 | -0.093 | -0.094 | 0.119  | -0.128 | -0.063 |
| A007173_01 | 0.287  |        | 0.23   | 0.32   | 0.171  | 0.154  | 0.132  | 0.355  | 0.114  |
| A007183_01 | -0.358 |        | -0.331 | 0.252  | 0.207  | -0.36  | -0.565 | -0.204 | -0.303 |
| A007211_01 | -0.298 | NA     |        | -0.361 | -0.292 | 0.345  | 0.482  | 0.7    | 0.757  |
| A007218_01 | NA     |        | -0.42  | -0.917 | NA     | NA     | NA     | -0.903 | NA     |
| A007219_01 | -0.438 |        | -0.647 | -0.088 | -0.109 | -0.593 | -0.245 | -0.128 | -0.162 |
| A007221_01 | -0.31  |        | -0.126 | NA     | -0.143 | 0.29   | 0.195  | 0.296  | 0.244  |
| A007222_01 | -0.948 |        | -0.643 | 0.25   | 0.178  | -0.083 | 0.01   | 0.225  | 0.315  |
| A007225_01 | NA     | NA     |        | -0.124 | -0.2   | NA     | NA     | NA     | -0.178 |
| A007228_01 | -0.086 |        | -0.093 | -1.117 | -0.78  | -0.351 | -0.42  | 0.05   | 0.055  |
| A007234_01 | 0.067  |        | 0.083  | -0.325 | -0.148 | 0.116  | 0.268  | -0.102 | 0.067  |
| A007242_01 | 0.416  |        | 0.253  | -0.407 | NA     | 0.317  | -0.02  | -0.127 | -0.049 |
| A007243_01 | 1.001  |        | 0.77   | 0.03   | 0.052  | 0.841  | 0.573  | 0.31   | 0.266  |
| A007245_01 | NA     |        | -0.687 | NA     | -0.241 | NA     | -0.582 | -0.259 | NA     |
| A007246_01 | -0.862 |        | -1.641 | -1.336 | -1.377 | -0.78  | -0.733 | -0.658 | -1.063 |
| A007250_01 | -0.07  |        | 0.097  | 0.283  | 0.286  | -0.324 | -0.293 | -0.13  | -0.18  |
| A007251_01 | 1.062  |        | 0.653  | NA     | 0.354  | 0.778  | 0.604  | 0.333  | 0.246  |
| A007252_01 | -0.628 |        | -0.356 | -0.018 | 0.075  | -0.894 | -0.333 | -0.425 | -0.336 |
| A007255_01 | 0.358  | NA     |        | 0.25   | 0.108  | -0.029 | NA     | NA     | 0.033  |
| A007256_01 | NA     | NA     |        | -0.174 | -0.295 | NA     | NA     | -0.246 | -0.515 |
| A007258_01 | -0.847 |        | -0.372 | -0.376 | -0.141 | 0.084  | 0.263  | 0.237  | 0.632  |
| A007259_01 | -0.07  |        | -0.039 | -0.385 | -0.138 | -0.257 | -0.213 | -0.199 | 0.037  |
| A007260_01 | 0.876  |        | 0.749  | 0.523  | 0.261  | 0.485  | 0.22   | 0.316  | 0.087  |
| A007262_01 | 0.517  |        | 0.006  | -0.262 | -0.007 | -0.135 | 0.045  | -0.04  | 0.18   |
| A007265_01 | -0.051 |        | -0.044 | 0.149  | 0.102  | -0.038 | -0.039 | -0.13  | 0.015  |
| A007266_01 | -0.753 |        | -0.387 | -0.495 | -0.359 | 0.074  | 0.074  | 0.378  | 0.301  |
| A007268_01 | 0.223  |        | 0.198  | -0.07  | -0.111 | -0.021 | 0.295  | 0.455  | 0.436  |
| A007272_01 | NA     | NA     |        | 0.529  | 0.465  | NA     | NA     | NA     | 0.282  |
| A007273_01 | NA     | NA     |        | -0.428 | -0.424 | NA     | NA     | -0.377 | -0.365 |
| A007274_01 | 0.252  |        | -0.114 | 0.281  | 0.225  | 0.568  | 0.424  | 0.273  | 0.32   |
| A007275_01 | NA     | NA     |        | 0.238  | 0.261  | 0.579  | 0.363  | 0.022  | 0.147  |
| A007277_01 | -0.263 |        | -0.265 | -0.1   | -0.013 | 0.023  | -0.061 | 0.147  | 0.185  |
| A007278_01 | 1.023  |        | 0.519  | -0.031 | 0.073  | -0.002 | NA     | -0.374 | -0.364 |
| A007279_01 | NA     | NA     |        | -0.168 | -0.244 | -0.519 | NA     | -0.109 | -0.318 |
| A007280_01 | -0.051 |        | 0.471  | 0.066  | 0.006  | -0.211 | 0.348  | 0.545  | 0.581  |
| A007281_01 | -0.146 |        | 0.043  | 0.297  | 0.231  | 0.074  | 0.05   | 0.063  | 0.022  |



|            |           |        |           |          |           |          |           |        |
|------------|-----------|--------|-----------|----------|-----------|----------|-----------|--------|
| A007283_01 | -0.723    | -0.314 | 0.416     | 0.387    | 0.442     | 0.315    | 0.254     | 0.341  |
| A007284_01 | 0.523 NA  |        | 0.439     | 0.25     | 0.481 NA  |          | 0.41      | 0.197  |
| A007285_01 | -0.402    | 0.268  | -0.724    | -0.42    | 0.429     | 0.93     | 0.337     | 0.668  |
| A007287_01 | -0.847    | -0.574 | 0.189     | 0.376    | -0.542    | -0.302   | -0.575    | -0.553 |
| A007288_01 | -1.948    | -1.572 | 0.644     | 0.342    | -0.963    | -0.6     | -0.038    | -0.233 |
| A007290_01 | -1.631    | -1.426 | -0.573    | -0.389   | -1.145    | -0.939   | -0.834    | -0.949 |
| A007291_01 | -0.93     | -0.525 | -0.865    | -0.687   | -0.694 NA |          | -0.238    | -0.301 |
| A007293_01 | -0.265    | -0.102 | -0.11     | 0.075    | -0.572    | -0.026   | -0.001    | 0.088  |
| A007294_01 | 0.338     | 0.419  | 0.638     | 0.562    | 0.814     | 0.606    | 0.187     | 0.204  |
| A007297_01 | 0.507     | 0.512  | 0.13      | -0.054   | 0.275     | 0.326    | 0.274     | 0.113  |
| A007298_01 | 0.111     | 0.349  | 0.048     | 0.135    | 0.448     | 0.443    | 0.279     | 0.385  |
| A007299_01 | 0.178     | 0.224  | 0.24      | 0.076    | -0.167    | -0.425   | -0.553    | -0.715 |
| A007300_01 | -0.36     | -0.428 | -1.156    | -1.002   | -0.853    | -0.833   | -0.818    | -0.866 |
| A007302_01 | 1.257     | 0.825  | -0.041    | 0.106    | 0.92      | 0.97     | 0.8       | 0.952  |
| A007303_01 | -0.374    | -0.193 | -0.525    | -0.455   | -0.49     | -0.309   | 0.079     | 0.043  |
| A007305_01 | -1.939    | -2.108 | -3.175    | -2.849   | -2.806    | -2.53    | -2.388    | -2.269 |
| A007306_01 | -0.81     | -0.173 | -0.227    | 0.073    | -0.209    | -0.208   | -0.635    | -0.257 |
| A007307_01 | -0.472    | -0.335 | 0.123     | 0.101    | -0.328    | -0.07    | 0.006     | 0.103  |
| A007309_01 | -0.449    | -0.199 | 0.175     | 0.049    | 0.143     | 0.147    | 0.061     | 0.018  |
| A007310_01 | -0.24 NA  |        | 0.147     | 0.134    | -0.005    | -0.173   | -0.24     | -0.378 |
| A007311_01 | -1.741    | -1.39  | -0.061    | -0.024   | -1.324    | -0.781   | -0.369    | -0.555 |
| A007313_01 | NA        | NA     | -0.935 NA | NA       | NA        | NA       | NA        | NA     |
| A007314_01 | 0.197     | 0.33   | 0.152     | 0.323    | 0.028     | 0.501    | 0.21      | 0.458  |
| A007315_01 | -0.542    | -0.057 | 0.154     | 0.168    | -0.26     | 0.455    | 0.198     | 0.316  |
| A007317_01 | NA        | NA     | 0.279     | 0.178 NA | NA        |          | -0.214    | -0.164 |
| A007318_01 | -0.1      | -0.023 | -1.295    | -0.992   | -0.357    | -0.371   | -0.503    | -0.539 |
| A007320_01 | -0.68     | -0.309 | 0.048     | 0.089    | -0.497    | -0.173   | -0.329    | -0.378 |
| A007322_01 | -0.645    | -0.452 | 0.423     | 0.418    | 0.138     | 0.192    | -0.191    | -0.084 |
| A007324_01 | 0.619     | 0.444  | 0.406     | 0.367    | 0.394     | 0.323 NA |           | 0.345  |
| A007325_01 | -1.22     | -0.477 | 0.204     | 0.083    | -0.333    | -0.017   | -0.264    | -0.313 |
| A007327_01 | 0.256     | 0.572  | -0.481    | -0.382   | 0.187     | 0.271    | 0.483     | 0.647  |
| A007331_01 | -0.102    | -0.063 | -0.056    | 0.019    | -0.427    | -0.614   | -0.295    | -0.26  |
| A007333_01 | -0.337 NA |        | -1.086 NA | NA       | NA        |          | -0.811 NA |        |
| A007334_01 | 0.157     | 0.388  | -0.409    | -0.458   | 1.051     | 0.713    | 0.624     | 0.669  |
| A007335_01 | -0.473    | -0.036 | 0.227     | 0.183    | -0.1      | -0.016   | 0.276     | 0.166  |
| A007336_01 | -0.785    | -0.164 | -0.358    | -0.16    | 0.7       | 0.64     | 0.436 NA  |        |
| A007338_01 | -0.903    | -0.798 | -0.888    | -0.703   | -0.663    | -0.599   | -0.704    | -0.643 |
| A007340_01 | 0.287     | 0.022  | -0.159    | -0.174   | -0.224    | -0.28    | -0.326    | -0.265 |
| A007341_01 | 0.569     | 0.546  | -0.079    | -0.175   | 0.5       | 0.344    | 0.076     | 0.009  |
| A007342_01 | -0.51     | -0.965 | -0.932    | -0.835   | -0.773    | -1.026   | -0.628    | -1.007 |
| A007347_01 | 0.256     | 0.396  | -0.04     | -0.036   | 0.337     | 0.45     | -0.188    | 0.178  |
| A007348_01 | -1.438    | -0.691 | 0.108     | 0.095    | -0.247    | -0.229   | -0.288    | -0.122 |
| A007349_01 | 0.238     | -0.018 | -0.146    | -0.224   | -0.192    | 0.019    | -0.157    | -0.137 |
| A007351_01 | 0.287     | 0.279  | 0.113     | 0.185    | 0.617     | 0.69     | 0.557     | 0.768  |
| A007353_01 | 0.864     | 1.042  | 0.279     | 0.556    | 0.711     | 1.421    | 0.905     | 1.427  |
| A007354_01 | 0.541 NA  |        | 0.11 NA   |          | 0.308 NA  |          | 0.48 NA   |        |
| A007357_01 | -2.016    | -1.678 | -1.504    | -1.105   | -1.692    | -1.286   | -1.387    | -1.408 |
| A007361_01 | 0.607     | 0.582  | 0.116     | 0.249    | 0.407     | 0.466    | 0.413     | 0.45   |
| A007362_01 | -2.003    | -1.391 | 0.267     | 0.402    | -2.109    | -1.483   | -1.17     | -0.665 |
| A007363_01 | 0.209     | 0.104  | -0.198    | -0.174   | -0.21     | -0.006   | 0.009     | 0.124  |
| A007364_01 | -0.676    | -0.374 | 0.074     | -0.089   | -0.181    | -0.069   | -0.178    | -0.271 |
| A007365_01 | 0.243 NA  |        | -0.403    | -0.342   | 0.096     | 0.201    | 0.121     | 0.14   |
| A007366_01 | NA        | 0.371  | 0.094     | 0.107    | 0.665     | 0.362    | 0.453     | 0.443  |
| A007367_01 | -1.081    | -0.765 | 0.125     | 0.168    | -1.286    | -0.97    | 0.22      | 0.315  |
| A007370_01 | -1.176    | -1.227 | 0.058     | -0.016   | -1.329    | -1.151   | -1.154    | -1.063 |
| A007372_01 | -0.493    | -0.279 | -0.38     | -0.28    | -0.09     | -0.078   | -0.042    | -0.079 |
| A007373_01 | -0.665    | -0.712 | 0.022     | -0.154   | -0.773    | -0.699   | -0.47     | -0.673 |
| A007375_01 | 0.205     | -0.033 | -0.174    | -0.254   | 0.071     | 0.203    | -0.075    | 0.078  |
| A007379_01 | 0.57      | 0.217  | -0.391    | -0.207   | 0.223     | 0.021    | -0.411    | -0.127 |
| A007382_01 | -0.62     | -0.784 | -0.133    | -0.342   | -0.534    | -0.43    | -0.149    | -0.149 |
| A007383_01 | 0.201     | 0.222  | -0.206    | -0.092   | 0.176     | 0.237    | -0.244    | -0.092 |
| A007384_01 | -0.352    | -0.082 | -0.208    | -0.061   | 0.194     | 0.349    | 0.202     | 0.301  |
| A007385_01 | 0.786     | 0.678  | -0.082    | -0.042   | 0.271     | 0.306    | 0.419     | 0.511  |
| A007386_01 | -0.342    | -0.231 | -0.281    | -0.164   | -0.46 NA  | NA       |           | 0.068  |
| A007387_01 | -0.379    | -0.457 | 0.174     | 0.156    | -0.499    | -0.68    | -0.483    | -0.601 |
| A007394_01 | NA        | NA     | 0.132 NA  | NA       | NA        |          | 0.378     | 0.299  |
| A007395_01 | -0.261    | -0.015 | 0.105     | 0.002    | -0.033    | -0.009   | 0.398     | 0.27   |
| A007405_01 | NA        | NA     | 0.273     | 0.153    | 0.103     | 0.12     | -0.015    | -0.154 |

|            |    |           |           |           |           |           |           |           |        |
|------------|----|-----------|-----------|-----------|-----------|-----------|-----------|-----------|--------|
| A007406_01 |    | -0.599    | -0.167    | 0.13      | -0.071    | 0.071     | -0.053    | 0.016     | -0.162 |
| A007409_01 | NA | NA        |           | -0.84 NA  | NA        | NA        | NA        | NA        |        |
| A007414_01 |    | 0.158     | 0.275     | -0.858    | -0.724    | -0.088    | 0.159     | 0.051     | 0.196  |
| A007422_01 |    | 0.288     | 0.319     | -0.195    | -0.117    | 0.374     | 0.215     | 0.152     | 0.13   |
| A007424_01 |    | 0.427     | 0.187     | 0.208     | 0.184 NA  |           | 0.24      | 0.159     | 0.301  |
| A007428_01 |    | 0.701     | 0.372     | -0.268    | -0.291    | 0.022     | 0.056     | 0.142     | 0.083  |
| A007429_01 |    | -0.656    | -0.464    | 0.045     | -0.003    | 0.702     | 0.591     | 0.653     | 0.631  |
| A007430_01 |    | 0.171     | 0.258     | -0.373    | -0.272    | -0.026    | 0.358     | 0.24      | 0.381  |
| A007431_01 |    | 0.389     | 0.34      | -0.008    | 0.035     | 0.311     | 0.004     | 0.421     | 0.419  |
| A007433_01 |    | -0.659    | 0.125     | 0.218     | 0.196     | 0.373     | 0.607     | 0.201     | 0.16   |
| A007434_01 | NA | NA        |           | 0.135     | 0.308     | 0.103 NA  |           | -0.19     | -0.088 |
| A007435_01 |    | 0.315     | 0.139     | -0.027    | 0.105     | 0.036 NA  | NA        | NA        |        |
| A007436_01 |    | 0.508 NA  |           | -0.246    | -0.011    | 0.251     | 0.951     | -0.372    | 0.209  |
| A007438_01 |    | -0.172    | -0.177    | -0.202    | -0.036    | -0.128    | -0.028    | 0.005     | 0.235  |
| A007442_01 |    | 0.514     | 0.39      | -0.467    | -0.216    | 0.604     | 0.7       | 0.885     | 1.056  |
| A007445_01 |    | 0.615     | 0.387     | -0.317    | -0.147    | 0.194     | 0.147     | -0.02     | 0.12   |
| A007459_01 |    | 0.456     | 0.325     | 0.233     | 0.236     | 0.278     | 0.494     | -0.026    | 0.451  |
| A007468_01 |    | 0.416 NA  |           | -0.111 NA |           | 0.382 NA  | NA        |           | 0.619  |
| A007475_01 |    | -2.611    | -3.152 NA | NA        |           | -2.578 NA | NA        |           | -2.337 |
| A007479_01 |    | 0.295     | -0.035    | -0.519 NA |           | 0.669     | 0.517     | 0.467     | 0.809  |
| A007484_01 |    | 0.339     | 0.36      | 0.312     | 0.065     | 0.28      | 0.089     | 0.222     | 0.062  |
| A007485_01 |    | 0.265     | -0.006    | 0.231     | 0.225     | 0.052     | -0.11     | 0.03      | 0.101  |
| A007498_01 |    | 0.325     | 0.261     | 0.167     | 0.254     | 0.169     | 0.226     | 0.32 NA   |        |
| A007499_01 |    | -0.816    | -0.584    | 0.159     | 0.275     | -0.148 NA |           | -0.075    | 0.097  |
| A007502_01 |    | 0.726     | 0.722     | 0.102     | 0.247     | 0.449     | 0.497     | 0.113     | 0.402  |
| A007508_01 | NA | NA        |           | -0.199    | -0.007 NA | NA        |           | -0.394    | -0.261 |
| A007510_01 |    | 0.643     | 0.236     | -0.292    | -0.149    | 0.291     | 0.391     | 0.156     | 0.414  |
| A007513_01 |    | 0.173     | 0.021     | -0.537    | -0.288    | -0.288    | -0.068    | -0.247    | -0.169 |
| A007519_01 | NA | NA        |           | -0.45 NA  | NA        | NA        |           | -0.317 NA |        |
| A007520_01 |    | 0.41      | 0.446     | -0.017    | -0.08     | 0.05      | 0.056     | -0.063    | -0.066 |
| A007521_01 |    | 0.236     | 0.034     | -0.207    | -0.168    | -0.034    | -0.11     | -0.075    | -0.024 |
| A007522_01 |    | 0.27      | -0.062    | 0.194     | 0.156     | -0.068    | -0.156    | -0.091    | -0.257 |
| A007524_01 | NA |           | -0.231    | 0.134     | 0.062     | 0.442     | 0.209     | 0.302     | 0.222  |
| A007526_01 | NA | NA        |           | 0.128     | 0.099 NA  | NA        |           | 0.278     | 0.24   |
| A007530_01 |    | -0.428    | -0.004    | 0.307     | 0.318     | -0.282    | -0.211    | -0.098    | -0.175 |
| A007535_01 |    | -0.75     | -0.633    | -0.087    | 0.122     | -0.547    | -0.012    | -0.041    | 0.229  |
| A007537_01 |    | -0.637    | -0.325    | 0.003     | 0.088     | 0.15      | 0.211     | -0.181    | 0.012  |
| A007548_01 |    | 0.449     | 0.725     | -0.686    | -0.482    | 0.077     | 0.238     | -0.715    | -0.533 |
| A007549_01 |    | -0.264    | -0.316    | 0.293     | 0.144     | -0.191    | -0.213    | -0.175    | -0.124 |
| A007554_01 | NA | NA        |           | -0.014    | 0.065 NA  | NA        |           | -0.212    | 0.051  |
| A007555_01 | NA | NA        |           | -0.389 NA | NA        | NA        | NA        | NA        | NA     |
| A007564_01 |    | 0.341     | 0.159     | -0.546 NA |           | -0.553 NA | NA        | NA        |        |
| A007565_01 | NA | NA        |           | 0.14      | 0.294     | 0.436     | 0.711     | 0.18      | 0.171  |
| A007567_01 |    | 0.326     | 0.157     | -0.34     | -0.285    | -0.131    | 0.205     | 0.104     | 0.44   |
| A007573_01 | NA | NA        |           | -0.331 NA | NA        | NA        |           | -0.058 NA |        |
| A007575_01 |    | -1.346 NA |           | -0.015    | -0.068    | -0.508    | -0.32     | 0.256     | 0.064  |
| A007577_01 | NA | NA        |           | -0.319    | -0.276    | 0.236     | 0.541     | 0.537     | 0.691  |
| A007582_01 | NA |           | -0.406    | -0.347 NA |           | 0.124 NA  | NA        |           | 0.115  |
| A007584_01 |    | 0.4       | 0.358     | 0.117     | 0.18      | 0.514     | 0.595     | 0.273     | 0.314  |
| A007589_01 |    | -0.258    | -0.181    | 0.127     | 0.094     | -0.036    | 0.086     | -0.173    | -0.162 |
| A007590_01 |    | 0.288     | -0.215    | 0.058     | 0.108 NA  |           | 0.292     | 0.402     | 0.236  |
| A007593_01 |    | -0.369    | -0.302    | 0.189     | 0.073     | -0.004    | -0.084    | 0.039     | -0.018 |
| A007596_01 | NA | NA        |           | 0.533     | 0.411     | 0.011     | 0.462     | -0.044    | 0.015  |
| A007597_01 |    | -1.014    | -0.821    | 0.318     | 0.087     | -0.457    | -0.308    | -0.067    | -0.307 |
| A007599_01 | NA |           | 0.465     | -0.016    | 0.063 NA  | NA        |           | -0.452    | -0.333 |
| A007600_01 |    | 0.093     | -0.09     | 0.054     | 0.082     | -0.008    | -0.188    | -0.135    | -0.157 |
| A007604_01 |    | 0.948     | 1.063     | 0.206     | 0.243     | 0.657     | 0.487     | 0.227     | 0.336  |
| A007606_01 |    | 0.004     | -0.3      | -0.221    | -0.154    | -0.212    | -0.291    | -0.092    | -0.1   |
| A007616_01 | NA | NA        |           | -0.011    | -0.04 NA  | NA        |           | -0.079    | 0.105  |
| A007618_01 |    | 0.823     | 0.992     | -0.001    | 0.04      | -0.186    | -0.02     | -0.057    | 0.05   |
| A007620_01 |    | -0.208    | -0.188    | 0.101     | 0.167     | -0.155    | 0.078     | -0.053    | 0.04   |
| A007621_01 |    | 0.596     | 0.556     | 0.099     | 0.11      | 0.309     | 0.398     | 0.266     | 0.319  |
| A007622_01 | NA |           | -0.408    | -0.798 NA |           | -0.461    | -0.653 NA | NA        |        |
| A007627_01 |    | -0.846    | -1.32     | -0.213    | -0.104    | -1.703    | -1.517    | -1.169    | -1.317 |
| A007630_01 | NA |           | -0.377    | -0.016    | -0.234    | -0.349 NA |           | -0.126    | -0.414 |
| A007644_01 | NA | NA        |           | -0.192    | 0.006 NA  | NA        |           | 0.059     | 0.415  |
| A007646_01 |    | -0.351    | -0.265    | -0.986    | -0.782    | -0.854    | -0.655    | -0.543    | -0.44  |
| A007648_01 |    | 0.259     | 0.174     | -0.092    | -0.053    | 0.171     | 0.191     | 0.228     | 0.354  |

|            |    |           |          |           |          |           |           |           |        |
|------------|----|-----------|----------|-----------|----------|-----------|-----------|-----------|--------|
| A007649_01 |    | 0.442     | 0.244 NA |           | 0.111    | 0.331     | 0.187     | 0.106     | 0.165  |
| A007651_01 |    | -0.33 NA  |          | 0.257     | 0.127    | -0.444    | -0.305 NA |           | -0.105 |
| A007654_01 |    | -0.255    | -0.057   | -0.212    | -0.17    | 0.096     | 0.209     | 0.187     | 0.237  |
| A007656_01 | NA | NA        |          | -0.582    | -0.32 NA |           | -1.467    | -0.945    | -0.849 |
| A007657_01 |    | 0.357     | 0.344    | 0.11      | 0.061    | 0.153     | 0.151     | 0.199     | 0.033  |
| A007659_01 |    | -0.056    | 0.117 NA |           | 0.231    | 0.005     | 0.204     | 0.022     | 0.006  |
| A007665_01 |    | 0.429     | 0.149    | -0.165    | -0.097   | -0.258    | -0.405    | -0.208    | -0.484 |
| A007680_01 |    | -0.195    | 0.016    | -0.01     | 0.13     | 0.296     | 0.471     | 0.275     | 0.447  |
| A007686_01 |    | 0.833     | 0.859    | 0.084     | 0.031    | 1.051     | 1.015     | 0.979     | 0.903  |
| A007696_01 |    | -0.564    | -0.007   | 0.3       | 0.432    | -0.183    | 0.044     | -0.24     | -0.021 |
| A007697_01 |    | -0.1      | -0.078   | -0.013    | 0.117    | -0.157    | -0.048    | -0.093    | -0.112 |
| A007702_01 |    | 0.372     | 0.098    | 0.033     | 0.04 NA  |           | -0.284    | -0.145    | -0.272 |
| A007704_01 |    | -0.08     | -0.092   | 0.441     | 0.488    | -0.467    | -0.232    | -0.191    | -0.06  |
| A007709_01 |    | 0.504     | 0.366    | 0.019     | -0.09    | 0.211     | 0.093     | 0.374     | 0.218  |
| A007714_01 |    | -0.385    | -0.026   | 0.239     | 0.245    | 0.04      | 0.179     | -0.297    | -0.305 |
| A007716_01 |    | 0.842     | 0.491    | 0.038     | 0.037    | 0.111     | 0.237     | 0.119     | 0.245  |
| A007723_01 | NA | NA        |          | 0.035 NA  | NA       | NA        | NA        | NA        |        |
| A007725_01 |    | 0.256     | 0.204    | -0.044    | -0.097   | 0.003     | -0.121    | 0.018     | -0.081 |
| A007727_01 | NA | NA        |          | 0.356     | 0.518 NA |           | 0.774     | 0.212     | 0.413  |
| A007730_01 | NA |           | -0.306   | -0.437    | -0.186   | -0.606 NA |           | -0.662    | -0.605 |
| A007733_01 |    | -1.226    | -1.113   | -0.256    | -0.09    | -0.783    | -0.614    | -0.377    | -0.434 |
| A007736_01 |    | 0.323     | 0.045    | 0.037     | 0.22     | 0.238     | -0.072    | 0.204     | 0.393  |
| A007739_01 | NA | NA        |          | 0.11      | 0.023 NA | NA        |           | -0.175    | -0.44  |
| A007744_01 | NA | NA        |          | -0.564 NA | NA       | NA        |           | -0.654 NA |        |
| A007746_01 |    | 0.786     | 0.971    | 0.183     | 0.144    | -0.053    | -0.197    | 0.012     | 0.005  |
| A007749_01 | NA | NA        |          | 0.324     | 0.158 NA | NA        |           | -0.149    | -0.123 |
| A007750_01 |    | -0.606    | -0.089   | 0.338     | 0.419    | 0.461     | 0.722     | 0.313     | 0.574  |
| A007753_01 |    | 0.334     | 0.437    | 0.304     | 0.223    | 0.461     | 0.394     | 0.205     | 0.119  |
| A007756_01 |    | -0.368    | 0.041    | -0.654    | -0.517   | 0.447     | 0.368     | 0.286     | 0.442  |
| A007757_01 |    | -0.039 NA |          | -0.489 NA |          | -0.381 NA | NA        | NA        |        |
| A007759_01 |    | -0.305    | -0.283   | 0.149     | -0.143   | -0.013    | -0.022    | -0.045    | -0.257 |
| A007762_01 | NA | NA        |          | 0.111     | 0.087 NA | NA        |           | -0.052    | -0.155 |
| A007765_01 |    | 0.06      | 0.095    | -0.568 NA |          | 0.106     | 0.208     | 0.419     | 0.305  |
| A007766_01 |    | 0.255     | 0.124    | -0.13     | 0.007    | 0.212     | 0.498     | 0.467     | 0.555  |
| A007767_01 | NA |           | -0.132   | -0.207    | -0.104   | -0.48     | -0.259    | -0.762    | -0.783 |
| A007768_01 |    | -1.066    | -0.79    | -0.045    | 0.019    | -0.449    | -0.411    | -0.072    | -0.082 |
| A007770_01 |    | 0.576     | 0.714    | -0.005    | 0.138    | 0.829     | 0.877     | 0.383     | 0.635  |
| A007776_01 | NA |           | -0.495   | -0.115 NA | NA       |           | -0.806 NA | NA        |        |
| A007778_01 |    | -0.087    | -0.055   | -0.367    | -0.402   | 0.066     | -0.008    | 0.443     | 0.33   |
| A007781_01 |    | -0.022    | 0.198    | 0.303     | 0.256    | 0.486     | 0.528     | 0.426     | 0.433  |
| A007786_01 | NA | NA        |          | 0.24      | 0.186    | 0.326     | 0.34      | 0.338     | 0.195  |
| A007791_01 |    | 0.158     | 0.411    | 0.152     | 0.126    | 0.072     | 0.185     | 0.232     | 0.149  |
| A007792_01 |    | -0.011    | 0.088    | -0.206    | -0.082   | -0.025    | 0.072     | 0.02      | 0.11   |
| A007793_01 |    | -0.175    | -0.377   | -0.111    | -0.079   | 0.168     | 0.038     | -0.036    | -0.057 |
| A007794_01 |    | -0.202    | 0.269    | -0.107    | -0.064   | 0.341     | 0.618     | 0.083     | 0.166  |
| A007795_01 |    | -0.952    | -1.162   | -0.418    | -0.291   | -0.48 NA  | NA        |           | -0.374 |
| A007797_01 |    | -3.188    | -3.115   | -0.722    | -0.53    | -2.532    | -2.071    | -1.597    | -1.397 |
| A007798_01 |    | 0.653 NA  |          | 0.594     | 0.503 NA | NA        |           | 0.401     | 0.403  |
| A007801_01 |    | -1.447    | -1.089   | 0.253     | 0.302    | -0.361    | -0.092    | -0.111    | 0.01   |
| A007804_01 |    | -0.402    | -0.283   | -0.856    | -0.748   | -0.735    | -0.678    | -0.647    | -0.548 |
| A007805_01 | NA | NA        |          | -0.076    | -0.084   | -0.697 NA |           | -0.492    | -0.627 |
| A007806_01 | NA | NA        |          | -0.503 NA | NA       | NA        | NA        | NA        |        |
| A007808_01 | NA | NA        |          | 0.084     | 0.07     | -0.242 NA |           | -0.131    | -0.273 |
| A007809_01 |    | -0.456    | -0.388   | -0.112    | -0.101   | -0.154    | -0.131    | -0.218    | -0.072 |
| A007810_01 |    | -0.973 NA |          | -0.181    | -0.205   | -0.692    | -0.642    | -0.319    | -0.218 |
| A007811_01 |    | 0.11 NA   |          | -0.144 NA |          | -0.263 NA |           | -0.152 NA |        |
| A007812_01 |    | 0.387     | 0.548    | 0.485     | 0.359    | 1.057     | 0.759     | 0.493     | 0.46   |
| A007814_01 |    | 0.759     | 0.619    | 0.592     | 0.637    | 0.47      | 0.233     | 0.038     | -0.055 |
| A007815_01 |    | -1.359    | -1.545   | -2.143    | -1.706   | -1.943    | -1.5      | -1.456    | -1.626 |
| A007816_01 |    | -0.688    | -0.976   | -1.681    | -1.211   | -1.76     | -1.415    | -1.286    | -0.935 |
| A007817_01 | NA | NA        |          | 0.323     | 0.45 NA  | NA        |           | 0.458     | 0.432  |
| A007820_01 |    | 0.406     | 0.343    | -0.161 NA |          | 0.104     | 0.224 NA  | NA        |        |
| A007823_01 |    | 0.232     | 0.255    | 0.141     | 0.316    | 0.032     | 0.197 NA  |           | 0.093  |
| A007827_01 |    | -0.81     | -0.343   | -0.015    | 0.09     | -0.12     | -0.004    | 0.114     | 0.153  |
| A007829_01 |    | 0.181     | 0.042    | 0.291     | 0.301    | 0.455     | 0.606     | 0.673     | 0.772  |
| A007830_01 |    | 0.181     | 0.169    | 0.37      | 0.306    | 0.522     | 0.257     | 0.427     | 0.216  |
| A007832_01 |    | 0.458     | 0.289    | 0.013     | 0.003    | 0.201     | 0.103     | 0.178     | 0.267  |
| A007833_01 | NA | NA        |          | -0.187 NA | NA       | NA        |           | 0.398     | 0.279  |

|            |    |        |        |        |        |        |        |        |        |
|------------|----|--------|--------|--------|--------|--------|--------|--------|--------|
| A007834_01 | NA | NA     | 0.139  | NA     | 0.254  | NA     | 0.208  | 0.374  |        |
| A007835_01 |    | 0.075  | 0.254  | 0.253  | 0.367  | 0.223  | 0.217  | -0.031 | 0.033  |
| A007836_01 |    | -1.513 | -1.371 | -0.224 | NA     | -0.542 | -0.734 | -0.034 | NA     |
| A007840_01 | NA | NA     | 0.26   | 0.179  | NA     | NA     | -0.236 | -0.505 |        |
| A007844_01 |    | -0.272 | 0.366  | 0.528  | 0.469  | 0.634  | 0.626  | 0.438  | 0.446  |
| A007846_01 |    | 0.668  | 0.507  | 0.211  | 0.361  | 0.544  | 0.66   | NA     | 0.479  |
| A007848_01 |    | 0.08   | 0.031  | 0.031  | -0.041 | 0.24   | 0.222  | 0.085  | 0.038  |
| A007850_01 | NA | NA     | 0.019  | 0.153  | 0.256  | 0.242  | 0.088  | 0.274  |        |
| A007852_01 |    | -0.856 | -0.548 | 0.153  | 0.214  | -0.054 | 0.01   | -0.129 | -0.079 |
| A007859_01 |    | 0.483  | 0.599  | 0.462  | 0.328  | 0.802  | 0.719  | 0.692  | 0.689  |
| A007860_01 |    | 0.451  | 0.565  | 0.857  | 0.608  | 0.347  | 0.304  | 0.139  | 0.075  |
| A007862_01 |    | -0.755 | -0.306 | -0.482 | NA     | -0.319 | -0.269 | -0.211 | NA     |
| A007865_01 |    | 0.122  | 0.131  | -0.361 | -0.266 | 0.167  | 0.338  | 0.35   | 0.349  |
| A007868_01 |    | 0.662  | 0.377  | 0.161  | 0.194  | 0.283  | -0.035 | 0.099  | 0.026  |
| A007870_01 |    | -0.13  | -0.138 | -0.111 | -0.128 | -0.112 | -0.139 | -0.266 | -0.121 |
| A007871_01 |    | -0.257 | -0.415 | -0.39  | -0.286 | -0.056 | -0.14  | -0.144 | -0.079 |
| A007873_01 |    | 0.295  | 0.106  | 0.084  | 0.183  | -0.085 | -0.374 | 0.052  | 0.068  |
| A007875_01 |    | -0.079 | -0.024 | -0.181 | -0.079 | -0.049 | -0.021 | -0.072 | -0.013 |
| A007876_01 |    | 0.072  | 0.531  | -0.233 | -0.119 | 0.248  | 0.102  | 0.023  | 0.008  |
| A007877_01 |    | -0.253 | -0.045 | 0.116  | 0.052  | -0.151 | -0.138 | 0.032  | 0.088  |
| A007878_01 |    | -0.959 | -0.659 | 0.005  | -0.015 | -0.234 | -0.371 | 0.048  | -0.143 |
| A007880_01 |    | 0.202  | 0.284  | 0.297  | 0.401  | 0.144  | 0.221  | -0.229 | -0.022 |
| A007883_01 | NA |        | -0.102 | -0.193 | -0.062 | -0.021 | 0.027  | -0.214 | -0.062 |
| A007885_01 |    | 0.41   | 0.351  | 0.183  | 0.217  | -0.006 | NA     | 0.088  | 0.067  |
| A007886_01 |    | 0.366  | 0.306  | -0.427 | -0.32  | 0.267  | 0.496  | 0.668  | 0.891  |
| A007891_01 |    | 0.085  | 0.445  | -0.323 | -0.284 | -0.358 | -0.213 | -0.189 | -0.306 |
| A007892_01 | NA | NA     | -1.307 | -1.009 | NA     | NA     | -0.825 | -0.62  |        |
| A007893_01 | NA | NA     | -0.475 | -0.375 | NA     | NA     | 0.342  | 0.344  |        |
| A007894_01 |    | -0.013 | -0.12  | -0.605 | -0.466 | -0.366 | -0.305 | -0.089 | 0.077  |
| A007896_01 |    | -0.469 | -0.574 | 0.444  | 0.249  | -0.879 | -0.89  | -0.054 | -0.106 |
| A007897_01 |    | 1.035  | 0.908  | 0.366  | 0.331  | 0.489  | 0.392  | 0.408  | 0.59   |
| A007898_01 |    | 0.65   | 0.781  | -0.431 | -0.316 | -0.399 | -0.362 | -0.141 | -0.32  |
| A007899_01 |    | 0.578  | 0.586  | 0.162  | 0.246  | 0.199  | 0.205  | 0.295  | 0.284  |
| A007901_01 |    | -0.42  | -0.589 | -0.139 | -0.232 | -0.5   | -0.394 | -0.129 | -0.203 |
| A007902_01 |    | 0.496  | 0.395  | 0.168  | 0.092  | 0.43   | 0.452  | 0.317  | 0.246  |
| A007903_01 |    | -0.621 | -0.363 | -0.291 | -0.294 | -0.22  | -0.534 | -0.229 | -0.382 |
| A007905_01 | NA | NA     | -1.093 | -0.81  | -0.075 | NA     | -0.769 | -0.801 |        |
| A007906_01 |    | 0.391  | 0.417  | 0.294  | 0.093  | 0.124  | 0.043  | 0.189  | -0.047 |
| A007923_01 |    | -0.012 | -0.13  | 0.265  | 0.073  | -0.186 | -0.337 | 0.099  | -0.134 |
| A007924_01 | NA | NA     | -0.105 | NA     | NA     | NA     | -0.123 | -0.227 |        |
| A007925_01 | NA | NA     | -0.194 | -0.071 | NA     | NA     | -0.262 | -0.046 |        |
| A007926_01 |    | 0.455  | 0.413  | -0.328 | -0.212 | 0.175  | 0.618  | 0.149  | 0.696  |
| A007929_01 |    | -0.17  | NA     | -0.681 | NA     | -0.596 | NA     | -0.207 | NA     |
| A007930_01 |    | -0.356 | -0.443 | -0.161 | -0.081 | -0.46  | -0.371 | -0.316 | -0.28  |
| A007931_01 |    | 0.134  | NA     | -0.173 | NA     | -0.296 | NA     | NA     | NA     |
| A007932_01 | NA | NA     | 0.155  | 0.17   | NA     | NA     | 0.059  | -0.173 |        |
| A007934_01 |    | 0.199  | -0.087 | -0.256 | NA     | -0.428 | -0.531 | -0.224 | -0.17  |
| A007939_01 |    | -0.416 | NA     | -0.189 | -0.385 | -0.349 | -0.273 | 0.17   | 0.074  |
| A007941_01 |    | 0.8    | 0.291  | 0.067  | 0.042  | 0.096  | 0.094  | 0.121  | 0.069  |
| A007942_01 |    | -0.149 | 0.281  | 0.151  | 0.133  | 0.02   | 0.347  | 0.256  | 0.411  |
| A007945_01 |    | 0.145  | NA     | 0.097  | 0.173  | 0.124  | NA     | 0.02   | 0.072  |
| A007947_01 |    | 0.428  | 0.466  | -0.078 | -0.151 | 0.462  | 0.428  | 0.374  | 0.402  |
| A007949_01 |    | -0.227 | -0.497 | -0.562 | -0.357 | -1.072 | -1.053 | -0.897 | -0.622 |
| A007950_01 |    | -1.375 | -0.988 | -0.512 | -0.29  | -0.293 | -0.168 | 0.349  | 0.477  |
| A007951_01 |    | -0.16  | 0.075  | -0.3   | -0.244 | -0.196 | -0.229 | 0.262  | 0.059  |
| A007952_01 |    | 0.421  | 0.538  | 0.319  | 0.257  | 0.349  | 0.354  | 0.141  | 0.058  |
| A007953_01 |    | 0.819  | 0.428  | 0.256  | 0.16   | 0.159  | 0.272  | 0.201  | 0.129  |
| A007954_01 |    | 0.566  | -0.096 | -0.169 | NA     | -0.579 | -0.667 | -0.154 | NA     |
| A007955_01 |    | 0.431  | 0.426  | -0.2   | -0.175 | 0.562  | 0.435  | 0.482  | 0.304  |
| A007959_01 |    | -0.383 | 0.041  | 0.468  | 0.343  | 0.295  | 0.209  | -0.112 | -0.105 |
| A007961_01 | NA |        | -0.242 | -0.335 | -0.167 | -0.074 | 0.028  | -0.234 | 0.035  |
| A007964_01 |    | -1.614 | -2.163 | -3.371 | -2.747 | NA     | -2.569 | -2.279 | -2.534 |
| A007966_01 |    | -0.273 | -0.229 | 0.383  | 0.318  | 0.194  | 0.321  | -0.185 | -0.017 |
| A007967_01 |    | 0.206  | 0.366  | -0.417 | -0.208 | 0.463  | 0.382  | 0.442  | 0.5    |
| A007969_01 |    | 0.514  | 0.608  | -0.126 | -0.009 | 0.538  | 0.499  | 0.538  | 0.452  |
| A007971_01 |    | 1.302  | 0.915  | -0.15  | -0.164 | NA     | NA     | -0.017 | 0.149  |
| A007973_01 |    | 0.304  | NA     | 0.457  | 0.213  | 0.309  | NA     | 0.177  | 0.037  |
| A007974_01 |    | 0.927  | 1.018  | 0.228  | 0.181  | -0.088 | -0.027 | -0.06  | -0.058 |

|            |    |           |          |           |           |           |           |           |        |
|------------|----|-----------|----------|-----------|-----------|-----------|-----------|-----------|--------|
| A007975_01 |    | 0.482     | -0.259   | -0.837    | -0.525    | -0.272    | -0.525    | -0.301    | -0.116 |
| A007977_01 |    | -1.124    | -0.12    | 0.167     | 0.403     | 0.056     | 0.437     | 0.012     | 0.294  |
| A007981_01 | NA |           | 0.296 NA |           | -0.376 NA | NA        |           | -0.687    | -0.43  |
| A007982_01 |    | 0.528     | 0.185    | -0.324    | -0.035    | 0.201     | -0.093    | -0.128    | 0.061  |
| A007983_01 |    | 0.64      | 0.448    | 0.214 NA  | NA        | NA        | NA        | NA        |        |
| A007988_01 |    | -0.895    | -0.568   | 0.088     | 0.103     | 0.053     | -0.073    | -0.126    | -0.156 |
| A007989_01 | NA | NA        |          | -0.323 NA |           | 0.717     | 0.632     | 0.689     | 0.79   |
| A007993_01 |    | -0.908 NA |          | 0.41      | 0.386     | -0.463 NA |           | -0.381    | -0.514 |
| A007994_01 |    | 0.4       | 0.234    | 0.126     | 0.113     | 0.321     | 0.416     | 0.248     | 0.362  |
| A007998_01 |    | 0.592 NA  |          | -0.401    | -0.186    | 0.254     | 0.139     | -0.231    | -0.083 |
| A008004_01 |    | 0.764     | 0.313    | 0.425     | 0.493     | 0.395     | 0.41      | 0.445     | 0.35   |
| A008005_01 |    | 0.009     | -0.434   | -0.813 NA |           | -0.521 NA | NA        | NA        |        |
| A008007_01 |    | -1.241    | -1       | 0.341     | 0.298     | -0.206    | -0.377    | -0.276    | -0.246 |
| A008009_01 |    | 0.263     | 0.037    | -0.051    | 0.107     | -0.137 NA | NA        | NA        |        |
| A008010_01 |    | 0.566     | 0.129    | -0.039    | 0.059     | -0.05     | -0.186    | -0.257    | -0.177 |
| A008012_01 |    | -0.24     | -0.103   | -0.175    | -0.042    | -0.16     | -0.197    | -0.154    | -0.143 |
| A008014_01 | NA |           | 0.105    | -0.052    | 0.073 NA  |           | 0.114     | 0.169     | 0.337  |
| A008017_01 |    | -1.074    | -0.737   | -0.024    | 0.055     | -0.891    | -0.88     | -0.449    | -0.538 |
| A008018_01 |    | 0.233     | 0.385    | -0.053    | 0.055     | 0.226     | 0.588     | 0.216     | 0.424  |
| A008026_01 |    | -0.638    | -0.528   | 0.097     | 0.104     | -0.458    | -0.291    | -0.313    | -0.235 |
| A008027_01 |    | -0.13     | -0.184   | -0.097    | -0.076    | -0.008    | -0.154    | -0.086    | -0.13  |
| A008033_01 |    | 0.103     | -0.002   | -0.497    | -0.326    | -0.021    | -0.09     | -0.075    | -0.04  |
| A008035_01 |    | 0.427     | 0.236    | -0.327    | -0.058    | 0.062     | 0.07      | 0.032     | -0.026 |
| A008036_01 |    | 0.253     | 0.096    | -0.469    | -0.294    | 0.296     | 0.274     | 0.378     | 0.172  |
| A008038_01 |    | -0.806    | -0.77    | -0.359    | -0.157    | -0.33     | -0.267    | -0.492    | -0.388 |
| A008039_01 |    | -0.706    | -0.186   | 0.115     | 0.154     | -0.512    | -0.113    | -0.142    | -0.061 |
| A008042_01 |    | 0.22      | 0.344    | 0.296     | 0.294     | 0.447     | 0.374     | 0.106     | 0.29   |
| A008043_01 |    | 0.368     | 0.37     | 0.296     | 0.385     | 0.852     | 0.709     | 0.854     | 1.047  |
| A008044_01 | NA | NA        |          | 0.15      | 0.008 NA  | NA        |           | 0.126     | 0.113  |
| A008047_01 | NA | NA        |          | -0.1      | 0.08      | 0.085 NA  |           | -0.323    | -0.198 |
| A008049_01 | NA | NA        |          | 0.085     | -0.031    | 0.003 NA  |           | -0.231    | -0.486 |
| A008052_01 |    | 0.769     | 0.564    | -0.451 NA |           | -0.3 NA   | NA        | NA        |        |
| A008053_01 |    | -0.3      | -0.183   | 0.18      | 0.35      | -0.414    | -0.065    | -0.474    | -0.263 |
| A008055_01 |    | -1.396    | -1.97    | -2.515    | -2.02     | -2.245    | -2.114    | -1.694    | -1.225 |
| A008056_01 |    | -1.896    | -2.339   | -3.032    | -2.504    | -3.057    | -2.492    | -1.335    | -1.238 |
| A008060_01 |    | -0.308    | -0.958   | -0.999    | -0.827    | -0.534    | -0.729    | -0.694    | -0.747 |
| A008068_01 |    | 0.687     | 0.55     | -0.045    | 0.079     | 0.748     | 0.662     | 0.487     | 0.66   |
| A008070_01 | NA | NA        |          | 0.199     | 0.166     | -0.274    | 0.041     | -0.066    | -0.123 |
| A008074_01 |    | -0.365    | -0.299   | -0.401    | -0.164    | 0.321     | 0.071     | 0.417     | 0.345  |
| A008081_01 |    | -0.288    | -0.173   | 0.062     | 0.141     | -0.233    | -0.245    | 0.115     | 0.111  |
| A008083_01 | NA | NA        |          | 0.481     | 0.443 NA  |           | 0.094     | -0.259    | -0.312 |
| A008087_01 |    | 0.088     | 0.194    | -0.87     | -0.583    | 0.002     | 0.3       | -0.344    | 0.171  |
| A008088_01 |    | -0.793    | 0.018    | 0.137     | 0.325     | -0.172    | 0.16      | -0.032    | 0.109  |
| A008089_01 |    | 0.241     | 0.017    | -0.052    | -0.139    | 0.021     | -0.109    | 0.316     | 0.359  |
| A008090_01 | NA | NA        |          | 0.354     | 0.213     | 0.34      | 0.067     | -0.018    | -0.05  |
| A008092_01 |    | -0.036    | -0.287   | 0.143     | -0.032 NA | NA        |           | -0.094    | -0.312 |
| A008094_01 | NA |           | -1.49    | 0.211 NA  |           | -0.721    | -1.12 NA  | NA        |        |
| A008107_01 | NA |           | -0.35    | 0.117     | -0.064 NA |           | -0.305    | -0.11     | -0.542 |
| A008119_01 |    | 0.742     | 0.645    | -0.191 NA |           | 0.495     | 0.745     | 0.594     | 0.899  |
| A008122_01 |    | 0.494     | 0.588    | -0.867 NA |           | 0.067     | 0.64      | 0.359     | 1.135  |
| A008127_01 |    | 0.265     | 0.073    | -0.311    | -0.304    | 0.328     | 0.331     | 0.472     | 0.437  |
| A008130_01 | NA |           | 0.29     | -0.734 NA | NA        | NA        | NA        | NA        |        |
| A008131_01 | NA | NA        |          | -0.61     | -0.405    | -1.039    | -0.689    | -0.165    | -0.077 |
| A008132_01 |    | -0.616    | -0.253   | 0.259     | 0.23      | -0.349    | -0.093    | -0.011    | -0.105 |
| A008133_01 | NA |           | -0.607   | 0.217     | 0.085     | 0.106     | 0.059     | 0.019     | -0.196 |
| A008135_01 |    | -0.12     | 0.08     | -0.114    | 0.07      | 0.02      | 0.268     | 0.042     | 0.203  |
| A008136_01 | NA | NA        |          | 0.176     | 0.098     | 0.245     | 0.29      | 0.08      | 0.156  |
| A008137_01 |    | 0.525     | 0.272    | 0.233     | 0.349     | -0.455 NA |           | -0.389 NA |        |
| A008139_01 |    | 0.563     | 0.393    | 0.182     | 0.144     | 0.562     | 0.562     | 0.357     | 0.381  |
| A008143_01 |    | -0.137 NA |          | -0.53     | -0.409    | -0.612    | -0.741    | -0.495 NA |        |
| A008148_01 |    | 0.474     | 0.406    | -0.209    | -0.09     | 0.109     | 0.307     | 0.24      | 0.295  |
| A008153_01 |    | 0.671     | 0.535    | 0.068 NA  |           | 0.514     | 0.644 NA  | NA        |        |
| A008161_01 |    | -0.246    | 0.126    | 0.189     | 0.277     | -0.111    | 0.131     | 0.118     | 0.038  |
| A008164_01 |    | -0.779    | -0.57    | -0.731 NA |           | -0.147    | -0.367 NA | NA        |        |
| A008165_01 |    | 0.731     | 0.344    | -0.401    | -0.195    | 0.377     | 0.647     | 0.079     | 0.472  |
| A008166_01 |    | 0.115     | 0.313    | -0.638    | -0.457    | -0.55     | 0.322     | -0.046    | 0.314  |
| A008170_01 |    | 0.171     | 0.464    | 0.316     | 0.061     | 0.087 NA  |           | 0.071     | -0.015 |
| A008172_01 |    | 0.094     | 0.035    | -0.531    | -0.369    | -0.636    | -0.61     | -0.169    | -0.511 |

|            |    |           |           |           |           |           |           |          |        |
|------------|----|-----------|-----------|-----------|-----------|-----------|-----------|----------|--------|
| A008173_01 |    | 0.513     | 0.269     | -0.254    | -0.25     | 0.436     | 0.168     | 0.61     | 0.53   |
| A008179_01 |    | 0.61      | 0.319     | 0.098     | 0.128     | 0.086     | 0.09      | 0.161    | 0.017  |
| A008182_01 | NA | NA        |           | 0.515     | 0.503     | -0.684    | -0.824    | 0.063    | 0.01   |
| A008183_01 |    | 0.005     | -0.19     | 0.04      | -0.026    | -0.022    | 0.234     | 0.127    | 0.144  |
| A008184_01 |    | 0.055     | 0.282     | 0.202     | 0.246     | 0.171     | 0.127     | -0.034   | 0.001  |
| A008191_01 |    | 0.241     | 0.311     | -0.409    | -0.084    | 0.811     | 0.83      | 0.547    | 0.789  |
| A008198_01 |    | -0.758    | -0.405    | -0.143    | -0.113    | -0.608    | -0.545    | -0.454   | -0.455 |
| A008201_01 |    | 0.012     | 0.017     | 0.111     | 0.169     | -0.292    | -0.179    | 0.057    | -0.084 |
| A008202_01 |    | 0.224     | 0.256     | 0.076     | 0.083     | -0.222    | -0.1      | -0.174   | -0.014 |
| A008212_01 |    | 0.115     | -0.111    | -0.941    | -0.652    | -0.512    | -0.416    | -0.656   | -0.232 |
| A008213_01 |    | 0.329     | 0.026     | -0.02     | -0.008    | 0.057     | -0.18     | -0.307   | -0.379 |
| A008214_01 |    | 0.391     | 0.55      | 0.513     | 0.443     | 0.464     | 0.81      | 0.44     | 0.596  |
| A008215_01 | NA | NA        |           | 0.35 NA   |           | 0.775     | 0.715     | 0.89     | 0.805  |
| A008218_01 | NA |           | 0.041     | -0.051    | 0.054     | 0.018     | -0.17     | -0.186   | -0.217 |
| A008221_01 | NA | NA        |           | 0.309     | -0.064 NA | NA        |           | -0.036   | -0.274 |
| A008245_01 |    | 0.661 NA  |           | 0.362     | 0.059     | 0.181     | 0.48      | 0.023    | 0.058  |
| A008247_01 |    | -0.027    | -0.084    | 0.114     | 0.176     | 0.207     | 0.421     | 0.284    | 0.262  |
| A008251_01 |    | 0.571     | 0.606     | -0.218    | -0.103    | 0.092     | 0.4       | 0.046    | 0.5    |
| A008252_01 | NA | NA        |           | 0.612     | 0.553     | 1.474     | 1.32      | 0.91     | 0.83   |
| A008254_01 | NA | NA        |           | -1.58     | -1.438 NA | NA        |           | -0.783   | -0.384 |
| A008260_01 | NA | NA        |           | 0.142 NA  |           | 0.28      | 0.234     | 0.02     | 0.244  |
| A008262_01 |    | 0.187     | 0.363     | 0.283     | 0.221     | 0.627     | 0.492     | 0.102    | 0.005  |
| A008268_01 |    | 0.352     | -0.01     | -0.268    | -0.246    | 0.087     | -0.189    | 0.591    | 0.542  |
| A008270_01 |    | 0.286     | 0.309     | 0.224     | 0.071     | 0.632     | 0.525     | 0.885    | 0.617  |
| A008271_01 |    | 0.254     | 0.098     | -0.101    | -0.079    | 0.125     | 0.09      | 0.211    | 0.237  |
| A008272_01 |    | 0.447     | 0.423     | 0.366     | 0.443     | 0.729     | 0.522     | 0.855    | 1.078  |
| A008277_01 |    | -0.094    | -0.124    | -0.379    | -0.364    | 0.067     | 0.169     | 0.09     | 0.243  |
| A008280_01 |    | 0.667     | 0.291     | -0.882    | -0.973    | 0.206     | 0.42      | 1.466    | 1.678  |
| A008281_01 |    | 0.483     | 0.485     | -0.288    | -0.199    | -0.292    | 0.062     | 0.017    | 0.253  |
| A008283_01 |    | 0.103     | 0.425     | 0.221 NA  |           | 0.398     | 0.318     | 0.154    | 0.206  |
| A008289_01 |    | 0.081     | -0.035    | -0.36     | -0.153    | 0.132     | 0.201     | 0.053    | 0.249  |
| A008290_01 | NA | NA        |           | -0.289 NA |           | 0.162 NA  | NA        |          | 0.54   |
| A008291_01 | NA |           | 0.094     | -0.222    | -0.005 NA |           | 0.246 NA  |          | 0.54   |
| A008292_01 |    | 0.237     | -0.205    | -0.131    | -0.044    | -0.043    | -0.401    | -0.171   | -0.335 |
| A008300_01 |    | -0.158    | 0.034     | -0.047    | 0.022     | 0.574     | 0.571     | 0.273    | 0.114  |
| A008301_01 |    | -0.021    | 0.101     | -0.341    | -0.205    | 0.25      | 0.171     | 0.019    | 0.114  |
| A008302_01 |    | -0.036    | -0.164    | -0.433    | -0.282    | 0.04      | 0.049     | 0.084    | 0.277  |
| A008303_01 |    | -0.081 NA |           | -0.478    | -0.409    | 0.162     | 0.1       | 0.565    | 0.556  |
| A008305_01 |    | -1.349    | -2.022 NA | NA        |           | -1.821    | -1.63     | -0.742   | -0.661 |
| A008308_01 |    | -0.926    | -0.752    | -0.054    | 0.012     | -0.265    | -0.273    | -0.412   | -0.469 |
| A008310_01 | NA |           | -0.064    | 0.141     | 0.211     | -0.035    | 0.211     | 0.334    | 0.394  |
| A008312_01 |    | -0.139    | 0.31      | -0.073    | 0.092     | 0.976     | 0.79      | 0.212    | 0.451  |
| A008313_01 |    | -0.039    | -0.235    | -0.296    | -0.291    | 0.015     | -0.054    | 0.058    | 0.095  |
| A008314_01 |    | 0.049     | -0.103    | -0.422    | -0.259    | -0.059    | 0.036     | 0.004    | 0.096  |
| A008315_01 |    | 0.808     | 0.406     | -0.535    | -0.304    | -0.029    | -0.134    | -0.309   | -0.041 |
| A008321_01 |    | 0.295     | 0.084     | -0.028    | 0.144     | 0.017     | -0.272 NA |          | 0.241  |
| A008325_01 |    | 0.115     | -0.183    | -0.113    | -0.004    | -0.07     | -0.204    | -0.426   | -0.064 |
| A008326_01 |    | 0.128     | 0.09      | -0.407    | -0.148    | 0.151     | 0.168     | 0.029    | 0.275  |
| A008327_01 |    | 0.248 NA  |           | -0.206    | -0.024    | 0.052     | 0.065     | 0.175    | 0.337  |
| A008329_01 |    | 0.282     | 0.105     | -0.008    | -0.074    | -0.565    | -0.489    | -0.078   | -0.201 |
| A008330_01 |    | -0.62     | 0.142     | 0.793     | 0.555     | 0.579 NA  |           | 0.172    | 0.01   |
| A008335_01 | NA | NA        |           | -0.2      | 0.071 NA  | NA        |           | -0.54 NA |        |
| A008336_01 |    | -0.942    | -0.438    | 0.399     | 0.466     | -0.255 NA |           | -0.169   | -0.195 |
| A008338_01 |    | 0.388     | -0.044    | -0.198    | -0.075    | 0.003     | -0.022    | -0.174   | 0.011  |
| A008339_01 | NA | NA        |           | -0.244    | -0.046    | 0.149 NA  |           | 0.096    | 0.278  |
| A008342_01 | NA |           | -0.082    | 0.407     | 0.314     | 0.102 NA  | NA        |          | -0.002 |
| A008350_01 | NA | NA        |           | -0.598 NA |           | -0.2 NA   | NA        | NA       |        |
| A008351_01 | NA | NA        |           | -0.197    | -0.068    | 0.067     | 0.086     | -0.081   | -0.011 |
| A008356_01 |    | -0.091    | -0.142    | 0.043     | -0.065    | -0.385    | -0.286    | -0.192   | -0.422 |
| A008358_01 | NA | NA        |           | 0         | 0.24      | -0.241 NA |           | -0.018   | -0.006 |
| A008368_01 |    | 0.551     | 0.432     | 0.005 NA  |           | -0.007    | 0.088 NA  | NA       |        |
| A008372_01 | NA | NA        |           | 0.235     | 0.204     | 0.092     | 0.214     | 0.4      | 0.49   |
| A008377_01 |    | 0.832     | 0.376     | -0.102    | -0.016    | 0.088     | -0.23     | 0.038    | 0.182  |
| A008379_01 | NA | NA        |           | 0.282     | 0.414 NA  | NA        |           | 0.049    | 0.037  |
| A008381_01 | NA | NA        |           | 0.104     | -0.024 NA | NA        |           | 0.127 NA |        |
| A008382_01 |    | 0.456     | 0.029     | -0.23 NA  |           | -0.071    | -0.028 NA | NA       |        |
| A008386_01 |    | -0.022    | -0.206    | -0.878    | -0.602    | -0.54     | -0.595    | -0.327   | -0.286 |
| A008390_01 |    | 0.109     | 0.127     | 0.075     | 0.054     | 0.4       | 0.398     | 0.505    | 0.651  |

|            |    |           |          |           |           |           |           |           |        |
|------------|----|-----------|----------|-----------|-----------|-----------|-----------|-----------|--------|
| A008391_01 |    | -0.362    | -0.513   | -0.298    | -0.34     | 0.071     | 0.248     | 0.204     | 0.372  |
| A008394_01 |    | -0.612    | -0.32    | 0.263     | 0.108     | -0.571    | -0.473    | -0.163    | -0.277 |
| A008397_01 |    | 0.253     | 0.164    | 0.071     | 0.076     | -0.272    | -0.116    | -0.181    | -0.088 |
| A008398_01 |    | 0.041     | -0.29    | -0.076    | -0.066    | -0.712    | -0.677    | -0.273    | -0.196 |
| A008408_01 |    | 0.142 NA  |          | 0.109     | -0.232    | 0.515 NA  |           | 0.461     | 0.355  |
| A008414_01 |    | 0.425     | 0.503    | -0.48     | -0.165    | 0.088     | 0.598     | 0.072     | 0.65   |
| A008415_01 |    | -0.856    | -0.922   | -0.983    | -0.869    | -0.946    | -0.63     | -1.238    | -1.294 |
| A008423_01 | NA |           | -0.33    | 0.527     | 0.367 NA  |           | 0.096     | 0.89      | 0.986  |
| A008432_01 |    | -0.104    | -0.919   | -0.491    | -0.61     | -0.232    | -0.623    | -0.505    | -0.803 |
| A008441_01 | NA |           | NA       | 0.309     | 0.105 NA  |           | 0.071     | 0.211     | 0.124  |
| A008445_01 |    | -0.341    | -0.52    | -0.428    | -0.224    | -1.095    | -0.878    | -0.459    | -0.194 |
| A008446_01 |    | -0.247 NA |          | -0.043    | -0.161    | -0.222    | -0.298    | -0.099    | -0.507 |
| A008448_01 |    | 0.092     | 0.17     | -0.406    | -0.254    | -0.087    | -0.025    | 0.253     | 0.414  |
| A008449_01 |    | 0.09      | -0.245   | -0.36     | -0.292    | -0.24     | -0.458    | -0.23     | -0.396 |
| A008452_01 | NA |           | -1.027   | -0.673    | -0.4      | -0.863    | -0.945    | -0.998    | -0.896 |
| A008453_01 | NA |           | -0.576   | 0.047     | 0.193     | 0.087     | -0.049    | -0.115    | -0.023 |
| A008454_01 |    | 0.318     | -0.069   | 0.541     | 0.198     | 0.237     | 0.165     | 0.085     | -0.118 |
| A008459_01 |    | 0.223     | 0.675    | 0.486     | 0.418     | 0.822     | 0.871     | 0.711     | 0.765  |
| A008463_01 | NA |           | NA       | 0.191     | -0.028    | 0.601     | 0.503     | 0.285     | 0.36   |
| A008472_01 |    | 0.439     | 0.804    | -0.168    | -0.091    | 0.317     | 0.013     | 0.155     | 0.034  |
| A008473_01 |    | -0.624    | -0.297   | -0.146    | 0.067     | -0.539    | -0.356    | -0.481    | -0.339 |
| A008475_01 |    | 0.084     | 0.179    | -0.687    | -0.514    | -0.031    | -0.017    | 0.375     | 0.385  |
| A008481_01 | NA |           | NA       | 0.272     | 0.223     | 0.315 NA  |           | -0.074    | -0.07  |
| A008483_01 |    | -0.255 NA |          | -0.295    | -0.298    | -0.167 NA | NA        |           | 0.362  |
| A008485_01 |    | -0.049    | 0.063    | -0.061 NA |           | 0.699     | 0.371     | 0.569     | 0.512  |
| A008486_01 | NA |           | -0.055   | -0.345    | -0.244 NA | NA        |           | -0.474    | -0.42  |
| A008499_01 |    | -0.061    | -0.302   | -0.222    | 0.012     | -0.527    | -0.333    | -0.423    | -0.171 |
| A008500_01 |    | -0.011    | 0.467    | 0.224     | 0.231     | 0.829     | 0.732     | 0.64      | 0.661  |
| A008505_01 |    | 0.227 NA  |          | 0.251     | 0.055     | -0.104    | 0.274 NA  | NA        |        |
| A008507_01 |    | -0.27     | 0.096    | 0.223     | 0.089     | 0.243     | 0.261     | 0.033     | 0.002  |
| A008511_01 |    | 0.142     | 0.029 NA |           | -0.23     | -0.663    | -0.424    | -0.627    | -0.445 |
| A008512_01 |    | -1.685    | -1.334   | -0.421    | -0.351    | -1.308    | -1.105    | -0.948    | -0.844 |
| A008514_01 |    | -0.117    | 0.304    | -0.181    | -0.071    | -0.325    | -0.156    | 0.049     | 0.128  |
| A008518_01 |    | 0.048 NA  |          | -1.218    | -1.073    | 0.667 NA  |           | -1.142    | -1.544 |
| A008520_01 |    | -0.482    | -0.081   | 0.427     | 0.182     | 0.486     | 0.296     | 0.814     | 0.558  |
| A008531_01 | NA |           | NA       | 0.356     | 0.441 NA  | NA        |           | 0.177     | 0.265  |
| A008532_01 |    | -0.225    | 0.097    | 0.36      | 0.403     | -0.075    | 0.418     | 0.496     | 0.524  |
| A008533_01 |    | 0.367     | 0.053    | -0.44     | -0.443    | 0.234     | -0.008    | 0.081     | 0.061  |
| A008534_01 |    | -0.157    | -0.237   | 0.033     | 0.066     | 0.38      | 0.384     | 0.452     | 0.633  |
| A008537_01 |    | 0.12      | 0.233    | -0.36     | -0.17     | 0.018     | 0.138     | 0.007     | -0.107 |
| A008538_01 |    | 0.035 NA  |          | 0.484     | 0.251     | 0.232 NA  |           | -0.07     | -0.222 |
| A008541_01 | NA |           | NA       | -0.458    | -0.383    | 0.898     | 1.091     | 0.871     | 1.166  |
| A008544_01 |    | -0.536    | 0.035    | 0.091     | 0.099     | -0.109    | 0.115     | -0.028    | -0.138 |
| A008545_01 |    | -0.69     | -0.16    | -0.669    | -0.505    | -0.411    | -0.383    | -0.219    | -0.268 |
| A008546_01 |    | -0.269    | -0.092   | 0.52      | 0.391     | 0.321     | 0.353     | 0.307     | 0.118  |
| A008548_01 |    | -0.1      | -0.537   | -0.918    | -0.621    | -0.166    | -0.622    | -0.637    | -0.66  |
| A008549_01 |    | -1.092    | -1.515   | -1.061    | -0.782    | -1.497    | -1.369    | -1.085    | -1.204 |
| A008553_01 |    | -0.911    | -1.095   | 0.251     | 0.362 NA  |           | -1.524    | -0.96     | -0.776 |
| A008557_01 |    | 0.146     | -0.063   | 0.104     | 0.079     | 0.006     | 0.34      | 0.302     | 0.339  |
| A008562_01 |    | -1.912    | -2.175   | -2.812    | -2.284    | -1.89     | -1.544    | -1.03     | -1.058 |
| A008564_01 |    | 0.023     | 0.292    | -0.127    | -0.039    | -0.123    | 0.216     | 0.048     | 0.068  |
| A008571_01 |    | -0.996    | -0.308   | 0.105     | 0.026     | 0.251     | 0.052     | 0.102     | -0.044 |
| A008572_01 |    | 0.422 NA  |          | 0.595     | 0.441     | 0.518 NA  |           | 0.333     | 0.352  |
| A008573_01 |    | -0.18     | -0.424   | -0.335    | -0.36     | -0.068    | -0.014    | -0.18     | -0.162 |
| A008575_01 |    | -0.094    | -0.059   | -0.275    | -0.275    | -0.165    | -0.127    | 0.121     | 0.056  |
| A008576_01 | NA |           | NA       | -0.276    | -0.038    | 0.322     | 0.598     | 0.458     | 0.509  |
| A008578_01 |    | -1.864    | -1.787   | -0.067    | -0.027    | -0.953    | -0.889    | -1.038    | -0.96  |
| A008580_01 |    | -0.911    | -0.588   | 0.089     | 0.054     | -0.364    | -0.458    | -0.105    | -0.114 |
| A008582_01 |    | 0.437     | 0.631    | 0.175     | 0.38      | 0.693     | 1.01      | 0.67      | 1.134  |
| A008583_01 |    | -0.263    | -0.313   | -0.407 NA |           | -0.5      | -0.358 NA | NA        |        |
| A008586_01 |    | -0.591    | -0.223   | 0.417     | 0.249     | 0.233     | 0.189     | 0.37      | 0.091  |
| A008587_01 |    | -0.734    | -1.088   | -0.348    | -0.242    | -1.512    | -1.335    | -0.735    | -0.655 |
| A008588_01 |    | 0.336     | -0.319   | -0.045    | -0.183    | 0.049     | -0.119    | -0.036    | -0.337 |
| A008589_01 |    | -0.558 NA | NA       | NA        |           | 0.143 NA  |           | -0.224 NA |        |
| A008598_01 |    | 0.548     | 0.433    | 0.37      | 0.219     | 0.355     | 0.242     | 0.124     | 0.013  |
| A008599_01 |    | -0.34     | -0.127   | -0.019    | -0.043    | 0.54      | 0.356     | 0.36      | 0.171  |
| A008601_01 |    | -1.219    | -1.124   | -1.629    | -1.201    | -1.329    | -1.048    | -1.22     | -1.088 |
| A008602_01 |    | -0.56     | -0.622   | -0.207    | -0.13     | -0.875    | -0.781    | -0.216    | -0.353 |

|            |    |           |        |           |           |           |          |           |        |
|------------|----|-----------|--------|-----------|-----------|-----------|----------|-----------|--------|
| A008603_01 |    | -1.246    | -0.356 | -0.213    | -0.111    | 0.226     | 0.45     | 0.378     | 0.514  |
| A008604_01 |    | -0.041    | -0.005 | 0.034     | 0.028     | -0.26     | -0.064   | 0.071     | 0.117  |
| A008605_01 |    | 0.443     | 0.889  | 0.083     | 0.252     | 0.12      | 1.089    | 0.622     | 1.136  |
| A008608_01 |    | -0.236    | -0.291 | -0.81     | -0.499    | -0.707    | -0.676   | -0.654    | -0.537 |
| A008615_01 |    | -0.65     | -0.613 | -0.092    | -0.072    | -0.172    | 0.001    | 0.54      | 0.659  |
| A008616_01 | NA |           |        | 0.156     | 0.061 NA  |           |          | -0.053    | -0.336 |
| A008621_01 |    | -0.104    | -0.112 | -0.737    | -0.299    | -0.369    | -0.572   | -0.624    | -0.417 |
| A008622_01 | NA |           |        | -0.445    | -0.356 NA |           |          | -0.115    | 0.052  |
| A008627_01 |    | -0.625    | -0.495 | 0.415     | 0.349     | -0.342 NA |          | -0.175    | -0.253 |
| A008631_01 | NA |           |        | -0.773    | -0.661 NA |           |          | -0.453    | -0.74  |
| A008632_01 |    | 0.462 NA  |        | -0.322 NA |           | -0.197 NA |          |           |        |
| A008637_01 |    | -0.161    | -0.196 | 0.182     | 0.218     | -0.066    | -0.153   | 0.017     | -0.018 |
| A008638_01 |    | -0.041    | 0.003  | 0.055     | -0.014    | -0.099    | -0.147   | 0.032     | -0.035 |
| A008639_01 |    | 0.033     | 0.291  | 0.466     | 0.453     | -0.182    | 0.044    | 0.008     | 0.014  |
| A008641_01 |    | 0.019     | 0.191  | -0.011    | 0.079     | 0.358     | 0.272    | 0.261     | 0.217  |
| A008644_01 |    | 0.338     | 0.214  | 0.036     | -0.001    | -0.195    | 0.172    | 0.097     | 0.15   |
| A008645_01 |    | -0.847    | -1.109 | -0.877    | -0.677    | -1.156    | -1.032   | -0.83     | -0.674 |
| A008648_01 |    | 0.937     | 0.833  | 0.217     | 0.275     | 0.262     | 0.234    | 0.099     | 0.167  |
| A008649_01 |    | -2.424    | -1.729 | -0.049    | -0.067    | -0.711    | -0.418   | -0.577    | -0.615 |
| A008651_01 |    | -1.067    | -0.719 | -0.041    | 0.09      | -0.491    | -0.47    | -0.45     | -0.349 |
| A008652_01 |    | -0.191    | -0.624 | -0.62     | -0.375    | -1.138    | -0.93    | -0.709    | -0.349 |
| A008653_01 |    | -0.029    | -0.116 | 0.13      | 0.113     | -0.074    | -0.068   | 0.165     | 0.034  |
| A008654_01 |    | -0.603    | 0.003  | 0.085     | 0.129     | -0.652    | -0.245   | -0.113    | -0.019 |
| A008655_01 |    | -0.65 NA  |        | -0.511    | -0.408    | -0.465 NA |          | -0.214    | -0.39  |
| A008657_01 |    | 0.088     | -0.093 | -0.515    | -0.385    | 0.316     | 0.115    | -0.1      | 0.024  |
| A008658_01 |    | 0.049     | 0.204  | 0.676     | 0.615     | 0.243     | 0.233    | 0.401     | 0.431  |
| A008660_01 |    | 0.707     | 0.764  | -0.424    | -0.25     | 1.155     | 1.156    | 0.315     | 0.543  |
| A008663_01 |    | -0.745    | -1.205 | -0.607    | -0.445    | -0.643    | -1.152   | -0.687    | -0.83  |
| A008664_01 |    | 0.378     | 0.427  | 0.062     | 0.151     | 0.417     | 1.065    | 0.603     | 0.917  |
| A008667_01 |    | -0.652    | -0.313 | 0.196     | 0.074     | 0.55      | 0.457    | 0.471     | 0.398  |
| A008668_01 |    | 0.158     | -0.081 | -0.326 NA |           | -0.715    | -0.678   | -0.274 NA |        |
| A008670_01 |    | 0.158 NA  |        | 0.086 NA  |           | 0.214 NA  |          | 0.293     | 0.174  |
| A008673_01 |    | 0.375     | 0.362  | 0.255     | 0.224     | 0.37      | 0.324    | 0.432     | 0.38   |
| A008676_01 |    | -0.219 NA |        | -0.226    | 0.001     | -0.064 NA |          | -0.124 NA |        |
| A008682_01 |    | 0.116     | -0.17  | -0.357    | -0.278    | -0.473    | -0.713   | -0.404    | -0.361 |
| A008685_01 |    | -0.668    | -0.903 | 0.461     | 0.267     | 0.268     | -0.066   | -0.018    | -0.111 |
| A008686_01 |    | -1.159 NA |        | -0.394    | -0.341    | -0.754    | -0.446   | -0.329    | -0.44  |
| A008692_01 |    | -0.324    | -0.459 | 0.906     | 0.933     | -0.885    | -0.631   | -0.315    | -0.022 |
| A008693_01 |    | -0.018    | -0.096 | -0.891    | -0.57     | -0.073    | 0.038    | -0.783    | -0.462 |
| A008699_01 |    | 0.248 NA  |        | -0.065 NA |           | -0.19     | -0.004   | 0.34      | 0.451  |
| A008703_01 |    | -0.594    | -0.508 | 0.127     | 0.121     | 0.286     | 0.156    | 0.157     | 0.09   |
| A008707_01 |    | -0.353    | -0.085 | 0.432     | 0.216     | -0.528    | -0.343   | -0.01     | -0.19  |
| A008720_01 |    | -0.169    | 0.052  | 0.023     | 0.062     | 0.01      | 0.129    | 0.344     | 0.28   |
| A008721_01 |    | -0.63     | -0.446 | -0.14     | 0.004     | -0.137 NA |          | -0.091    | 0.049  |
| A008722_01 |    | -0.303    | -0.429 | 0.634     | 0.518     | 0.083     | 0.037    | 0.242     | 0.248  |
| A008726_01 |    | -0.128    | -0.166 | 0.011     | -0.039    | -0.127    | -0.402   | -0.191    | -0.119 |
| A008727_01 |    | -1.2      | -1.291 | -1.697    | -1.27     | -1.403    | -1.306   | -1.23     | -1.227 |
| A008728_01 |    | -0.804    | -0.616 | 0.304     | 0.218     | 0.332     | 0.619    | 0.754     | 0.78   |
| A008731_01 |    | -1.105    | -1.219 | -0.521    | -0.379    | -1.207    | -1.174   | -1.085    | -1.235 |
| A008733_01 |    | -0.187    | 0.146  | 0.417     | 0.184     | 0.073     | 0.125    | 0.117     | -0.026 |
| A008735_01 |    | -0.357    | -0.603 | 0.276     | 0.173 NA  |           | 0.15     | 0.205     | 0.098  |
| A008737_01 |    | -0.345    | -0.185 | -0.26     | -0.234    | -0.31     | -0.342   | -0.028    | -0.251 |
| A008739_01 |    | -0.231 NA |        | -0.108 NA |           | 0.144 NA  |          |           |        |
| A008742_01 |    | -0.036    | 0.195  | -1.171    | -0.74     | 0.627     | 1.329    | 0.981     | 1.423  |
| A008748_01 |    | 0.462 NA  |        | 0.26 NA   |           | 1.036 NA  |          |           |        |
| A008752_01 | NA |           |        | 0.075     | 0.026 NA  |           |          | 0.155     | 0.114  |
| A008753_01 |    | 0.507 NA  |        | 0.204     | 0.122     | -0.116    | -0.278   | -0.079    | -0.356 |
| A008755_01 | NA |           |        | 0.342     | -0.009 NA |           | -0.145   | -0.029    | -0.247 |
| A008758_01 |    | -0.127    | -0.014 | -0.53     | -0.416    | -0.184    | -0.202   | -0.197    | 0.147  |
| A008759_01 |    | 0.696     | 0.36   | -0.216    | -0.096    | 0.1       | 0.067    | 0.027     | 0.315  |
| A008762_01 |    | 1.072     | 0.685  | -0.102    | -0.043    | 0.196     | 0.079    | 0.033     | -0.099 |
| A008763_01 |    | 0.029     | 0.225  | -0.489    | -0.075    | -0.428    | -0.137   | -0.53     | -0.114 |
| A008764_01 | NA |           |        | 0.315     | 0.208 NA  |           |          | 0.024 NA  |        |
| A008775_01 | NA |           |        | -0.188    | -0.3 NA   |           |          | -0.133    | -0.242 |
| A008776_01 |    | 0.223     | 0.102  | -0.215    | -0.145    | 0.181     | 0.414    | 0.289     | 0.499  |
| A008783_01 |    | 0.125     | -0.056 | 0.31      | 0.105     | 0.619     | 0.443    | 0.746     | 0.59   |
| A008784_01 |    | -0.357    | -0.254 | -0.205    | -0.006    | -0.032    | 0.063 NA |           | 0.223  |
| A008790_01 |    | 0.42      | 0.403  | -0.091    | -0.122    | 0.792     | 0.588    | 0.309     | 0.246  |



|            |    |           |           |           |           |           |           |           |        |
|------------|----|-----------|-----------|-----------|-----------|-----------|-----------|-----------|--------|
| A008793_01 |    | 0.645     | 0.521     | 0.137     | 0.254     | 0.592     | 0.462     | 0.441     | 0.646  |
| A008794_01 |    | -0.12     | -0.234    | 0.135     | 0.257     | -0.535    | -0.103    | -0.13     | 0.173  |
| A008795_01 |    | 0.058     | -0.009    | 0.474     | 0.41      | -0.016    | 0.201     | -0.178    | -0.132 |
| A008798_01 |    | 0.353     | 0.239     | 0.154     | 0.214     | 0.15      | 0.131     | -0.027    | -0.077 |
| A008800_01 |    | 0.341     | 0.169     | 0.016     | 0.123     | -0.09     | -0.109    | -0.153    | -0.099 |
| A008801_01 |    | 0.583     | 0.536     | -0.307    | -0.157    | 0.269     | 0.529     | 0.267     | 0.6    |
| A008803_01 |    | 0.024     | 0.164     | -0.293    | 0.011     | -0.333    | 0.031     | -0.761    | -0.352 |
| A008805_01 |    | 0.706     | 0.544     | -0.187    | 0.061     | 0.463     | 0.299     | 0.097     | 0.435  |
| A008807_01 |    | 0.366     | 0.019     | 0.464     | 0.515     | 0.495     | 0.601     | 0.295     | 0.414  |
| A008810_01 |    | -0.524    | -0.649    | 0.135     | -0.125    | -0.481    | -0.559    | -0.248    | -0.564 |
| A008813_01 |    | 0.244     | 0.071     | -0.043 NA |           | 0.13      | 0.13      | 0.185     | 0.261  |
| A008814_01 |    | 0.601     | 0.333     | 0.51      | 0.295     | 0.305     | 0.07      | 0.236     | 0.036  |
| A008818_01 |    | 0.705     | 0.545     | -1.359    | -0.965    | 0.105     | -0.02     | -1.702    | -1.699 |
| A008819_01 |    | -0.369    | -0.07     | 0.381     | 0.252     | 0.389     | 0.536     | 0.662     | 0.706  |
| A008821_01 | NA |           | -0.787 NA | NA        | NA        |           | -0.455 NA | NA        |        |
| A008827_01 |    | 0.29      | 0.328     | -0.028    | 0.161     | -0.08     | 0.083     | -0.129    | 0.096  |
| A008830_01 |    | 0.605     | 0.526     | -0.292    | -0.24     | 0.518     | 0.458     | 0.396     | 0.503  |
| A008835_01 |    | 0.263     | 0.233     | 0.168     | 0.166     | 0.368     | 0.327     | 0.078     | 0.092  |
| A008838_01 | NA | NA        |           | 0.094     | 0.231 NA  | NA        | NA        |           | 0.233  |
| A008840_01 |    | -0.408    | -0.413    | 0.442     | 0.44      | -0.156    | -0.21 NA  |           | 0.219  |
| A008842_01 |    | -0.079    | -0.118    | -0.494    | -0.295    | -0.392    | -0.307    | -0.319    | -0.246 |
| A008846_01 | NA | NA        |           | -0.174    | 0.131 NA  | NA        | NA        |           | -0.226 |
| A008847_01 |    | -0.161    | -0.249    | -0.881    | -0.512    | -0.617    | -0.314    | -0.38     | 0.064  |
| A008855_01 |    | -0.82 NA  |           | -0.388    | -0.35     | -0.471 NA |           | -0.515 NA |        |
| A008857_01 |    | -1.414    | -1.534    | -2.52     | -1.845    | -3.115    | -2.099    | -2.064    | -1.583 |
| A008858_01 |    | -0.235    | -0.187    | 0.13      | 0.262     | 0.412     | 0.468     | 0.117     | 0.136  |
| A008860_01 | NA | NA        |           | 0.21      | 0.195 NA  | NA        |           | -0.088    | -0.154 |
| A008861_01 |    | 0.701     | 0.682     | -1.048    | -0.64     | -0.417    | -0.551    | -0.655    | -0.747 |
| A008862_01 |    | 0.081     | 0.061     | -0.246    | -0.215    | -0.041    | -0.215    | 0.045     | -0.005 |
| A008863_01 |    | -0.161    | -0.11     | 0.052     | 0.017     | -0.222    | -0.086 NA |           | -0.093 |
| A008865_01 |    | 0.001     | 0.354     | -0.717    | -0.418    | 0.117     | 0.598     | 0.14      | 0.479  |
| A008867_01 |    | 0.577     | 0.63      | 0.004     | 0.222     | 0.432     | 1.171     | 1.003     | 1.135  |
| A008872_01 |    | -0.149    | -0.201    | -0.748    | -0.634    | -0.603    | -0.606    | -0.184    | -0.272 |
| A008873_01 |    | -1.97     | -1.856    | -0.552    | -0.403    | -0.379    | 0.031     | 0.044     | 0.349  |
| A008874_01 |    | 0.07      | 0.016     | -0.214    | -0.017    | 0.201     | 0.189     | 0.285     | 0.208  |
| A008877_01 |    | -0.777    | -0.22     | 0.107     | 0.128     | 0.584     | 0.415     | 0.179     | 0.17   |
| A008878_01 |    | -0.058    | 0.411     | -0.02     | 0.189     | -0.582    | -0.028    | -0.059    | 0.169  |
| A008880_01 |    | 0.346     | 0.089     | 0.188     | 0.155     | 0.232     | -0.038    | -0.172    | -0.052 |
| A008881_01 |    | -0.859    | -0.9      | -1.15     | -0.722    | -1.091    | -1.029    | -1.031    | -1.194 |
| A008882_01 |    | 0.501     | 0.485     | 0.031     | 0.157     | 0.202     | 0.148     | 0.277     | 0.274  |
| A008883_01 |    | -0.284    | -0.766    | -0.876    | -0.532    | -0.451    | -1.169    | -0.852    | -0.705 |
| A008889_01 |    | -0.33 NA  |           | 0.318     | 0.308     | -0.271    | 0.553     | 0.098     | 0.153  |
| A008890_01 |    | 0.394     | 0.465     | 0.024     | 0.209 NA  |           | 0.341 NA  |           | 0.478  |
| A008896_01 | NA | NA        |           | -0.397    | -0.289 NA | NA        |           | -0.609    | -0.53  |
| A008899_01 |    | 0.565     | 0.126     | -0.567 NA |           | 0.044 NA  | NA        | NA        |        |
| A008904_01 |    | -1.582    | -1.527    | -0.69     | -0.43     | -1.404    | -1.115    | -0.871    | -0.789 |
| A008906_01 |    | 0.022     | -0.189    | -0.611    | -0.544    | 0.109     | -0.063    | -0.085    | -0.169 |
| A008909_01 | NA |           | -0.036    | 0.286     | 0.338 NA  |           | -0.257    | -0.303    | -0.247 |
| A008913_01 |    | -0.25     | -0.473    | -0.628    | -0.494    | -0.773    | -0.768    | -0.506    | -0.57  |
| A008919_01 |    | 1.045     | 1.111     | -0.47 NA  |           | 0.663     | 0.919     | 0.689     | 1.151  |
| A008920_01 |    | -0.343    | -0.724    | -1.353    | -1.211    | -1.01     | -1.28     | -0.953    | -1.112 |
| A008922_01 |    | -0.399    | -0.051    | -0.352    | -0.254    | -0.342    | -0.018    | -0.099    | -0.257 |
| A008924_01 |    | -0.319    | -0.286    | 0.49      | 0.421     | 0.372     | 0.61      | 0.949     | 0.968  |
| A008926_01 |    | -0.441    | -0.591    | -0.542    | -0.439    | -0.932    | -0.862    | -0.546    | -0.499 |
| A008929_01 |    | -0.244    | -0.209    | -0.221 NA |           | -0.548    | -0.28 NA  | NA        |        |
| A008933_01 |    | 0.374     | 0.322     | -0.514    | -0.401    | 0.006     | 0.123     | 0.007     | -0.039 |
| A008934_01 | NA | NA        |           | -0.036    | -0.018    | -0.503    | -0.458    | -0.196    | -0.38  |
| A008936_01 |    | 0.658     | 0.312     | 0.079     | 0.222     | 0.369     | 0.048     | -0.115    | -0.046 |
| A008937_01 |    | -0.602    | -0.687    | -0.559    | -0.482    | -0.939    | -0.7      | -0.534    | -0.522 |
| A008938_01 | NA | NA        |           | -0.029    | 0.025 NA  | NA        |           | 0.446     | 0.405  |
| A008939_01 |    | -0.421 NA |           | 0.124     | 0.333     | -0.148 NA |           | -0.413    | -0.217 |
| A008944_01 |    | 0.177     | -0.201    | -0.89     | -0.669    | -0.537    | -0.652    | -0.549    | -0.364 |
| A008945_01 |    | 0.197     | 0.129     | -0.04     | 0.111     | 0.166     | 0.009     | -0.064    | -0.025 |
| A008949_01 |    | 0.167     | 0.297     | -0.452    | -0.312    | 0.04      | 0.08      | 0.289     | 0.451  |
| A008950_01 |    | 0.466     | 0.628     | 0.335     | 0.22      | 0.188     | 0.418     | 0.4       | 0.261  |
| A008952_01 |    | 0.959     | 0.568     | 0.047     | 0.151     | 0.114     | 0.058     | 0.184     | 0.352  |
| A008953_01 |    | -0.057    | 0.222     | -0.063    | 0.011     | 0.158     | 0.24      | 0.055     | 0.102  |
| A008955_01 |    | 0.105     | 0.385     | -0.172    | 0.08      | -0.022    | 0.515     | 0.813     | 0.926  |

|            |    |           |          |           |           |           |        |           |        |
|------------|----|-----------|----------|-----------|-----------|-----------|--------|-----------|--------|
| A008958_01 |    | 0.03      | 0.123    | 0.43      | 0.585     | 0.111     | 0.371  | 0.149     | 0.276  |
| A008961_01 |    | 0.606     | 0.688    | -0.079    | 0.213     | 0.603     | 1.19   | 0.462     | 1.071  |
| A008963_01 |    | -0.479    | 0.171    | 0.113     | 0.216     | 0.591     | 0.443  | 0.224     | 0.301  |
| A008965_01 |    | -0.462    | -0.014   | 0.18      | 0.401     | -0.266    | -0.129 | 0.038     | 0.162  |
| A008967_01 |    | -0.603    | -0.173   | -0.497    | -0.031    | 0.212     | 0.159  | 0.393     | 0.451  |
| A008969_01 |    | 0.22      | -0.595   | -0.742    | -0.563    | -0.646    | -0.656 | -0.321    | -0.246 |
| A008972_01 |    | 0.724     | 0.456    | -0.147 NA |           | 0.699     | 0.543  | 0.944     | 0.94   |
| A008973_01 |    | -0.564 NA |          | -0.126 NA |           | 0.089 NA  |        | 0.102     | 0.177  |
| A008974_01 |    | 0.565     | 0.435    | -0.055    | 0.122     | 0.039     | 0.242  | 0.101     | 0.65   |
| A008975_01 |    | 0.299     | 0.266    | 0         | 0.011     | -0.27     | 0      | 0.024     | 0.101  |
| A008980_01 |    | 0.589     | 0.355    | -0.272    | -0.095    | -0.225    | -0.13  | -0.244    | 0.122  |
| A008981_01 |    | -0.28     | -0.225   | -0.04     | -0.095    | 0.21      | -0.21  | 0.09      | 0.047  |
| A008983_01 |    | -0.106    | -0.011   | -0.858    | -0.578    | 0.225     | 0.028  | -0.186    | -0.227 |
| A008984_01 | NA | NA        |          | 0.106     | 0.105 NA  | NA        |        | 0.037     | 0.02   |
| A008985_01 |    | -0.002    | 0.096    | 0.572     | 0.416     | 0.094     | 0.132  | 0.06      | -0.022 |
| A008988_01 |    | 0.075     | 0.188    | 0.072     | 0.204     | -0.229    | -0.314 | -0.1      | -0.07  |
| A008989_01 |    | 0.439     | 0.519    | 0.139     | 0.144     | 0.254     | 0.484  | 0.131     | 0.274  |
| A008992_01 |    | 0.149     | 0.135    | 0.211     | 0.224     | -0.057    | 0.18   | -0.2      | -0.139 |
| A008995_01 |    | 0.268     | 0.41     | 0.27      | 0.314     | 0.475     | 0.412  | 0.211     | 0.208  |
| A008997_01 | NA | NA        |          | 0.056     | 0.257 NA  |           | 0.239  | -0.01     | 0.135  |
| A008999_01 |    | 0.13      | 0.015    | -0.476    | -0.396    | 0.051     | 0.202  | 0.167     | 0.22   |
| A009005_01 |    | -0.386    | -0.211   | -0.312    | -0.158    | -0.209    | -0.037 | -0.19     | 0.058  |
| A009011_01 |    | 0.15      | 0.043    | -1.672    | -1.4      | -0.644    | -0.641 | 0.175     | 0.088  |
| A009014_01 |    | 0.447     | 0.273    | -0.319    | -0.225    | 0.092     | 0.083  | 0.108     | 0.142  |
| A009016_01 |    | -0.132    | -0.768   | -0.557    | -0.422    | -0.369    | -0.804 | -0.481    | -0.442 |
| A009021_01 | NA |           | 0.306    | 0.025     | 0.043     | 0.296     | 0.299  | 0.143 NA  |        |
| A009022_01 |    | -0.27     | -0.036   | -0.047    | -0.004    | 0.09      | 0.168  | 0.254     | 0.191  |
| A009026_01 | NA | NA        |          | 0.398     | 0.392     | 0.155 NA  |        | 0.218     | 0.078  |
| A009028_01 |    | -0.952    | -0.781   | 0.036     | 0.122     | -1.037    | -0.804 | -0.5      | -0.432 |
| A009031_01 |    | -0.706    | -0.942   | -0.832    | -0.715    | -0.951    | -0.985 | -0.587    | -0.536 |
| A009033_01 |    | 0.518     | 0.258    | -0.447    | -0.27     | 0.178     | -0.05  | -0.069    | 0.052  |
| A009036_01 |    | -0.543    | -0.289   | -0.133    | -0.121    | -0.257    | -0.112 | -0.231    | -0.226 |
| A009037_01 |    | -0.642 NA |          | -1.363    | -1.176    | -0.628    | -0.902 | -0.768    | -0.855 |
| A009044_01 |    | 0.496     | 0.529    | 0.522     | 0.461     | 0.751     | 0.515  | 0.846     | 0.743  |
| A009049_01 |    | -0.083 NA |          | 0.416     | 0.459     | 0.173     | -0.044 | 0.302     | 0.347  |
| A009052_01 |    | -0.16     | 0.121    | 0.123     | 0.097     | -0.343    | -0.264 | 0.117     | 0.007  |
| A009055_01 |    | 0.32      | 0.4      | 0.369     | 0.249     | 0.544     | 0.564  | 0.826     | 0.89   |
| A009056_01 |    | 0.252     | 0.238    | 0.206     | 0.216     | 0.1       | 0.234  | 0.146     | 0.373  |
| A009060_01 |    | -0.273    | -0.32    | -0.401    | -0.247    | 0.218     | 0.156  | 0.534     | 0.482  |
| A009064_01 |    | 0.388     | 0.314    | 0.21      | 0.421     | -0.008    | 0.432  | 0.188     | 0.574  |
| A009072_01 |    | 0.701     | 0.355    | -0.245 NA |           | 0.523     | 0.478  | 0.473     | 0.775  |
| A009073_01 | NA |           | 0.108    | 0.253     | 0.242 NA  | NA        |        | -0.239    | -0.178 |
| A009076_01 |    | 0.466     | 0.387    | -0.128    | -0.013    | -0.01     | 0.049  | 0.458     | 0.602  |
| A009077_01 |    | -0.893    | -0.46    | 0.407     | 0.332     | 0.04      | 0.118  | 0.158     | 0.061  |
| A009081_01 |    | 0.391     | 0.436    | -0.169    | -0.029    | 0.712     | 0.576  | 0.418     | 0.49   |
| A009087_01 |    | -1.812    | -1.765   | -1.431    | -1.164    | -1.435    | -1.405 | -1.071    | -1.014 |
| A009088_01 |    | -0.713    | -1.106   | -0.039    | 0.061     | 0.059     | -0.134 | -0.277    | -0.258 |
| A009095_01 | NA | NA        |          | 0.367     | 0.105 NA  | NA        |        | 0.102     | -0.022 |
| A009099_01 |    | 0.29      | 0.138    | -0.158    | -0.149    | 0.365     | 0.052  | 0.217     | 0.305  |
| A009102_01 |    | -0.649    | -0.696   | -0.34     | -0.315    | -0.563    | -0.575 | -0.337    | -0.424 |
| A009105_01 |    | 0.332     | 0.363    | 0.081     | 0.192     | 0.815     | 0.495  | 0.266     | 0.489  |
| A009106_01 |    | -0.783    | -0.477   | -0.065    | 0.063     | 0.104     | 0.05   | 0.079     | 0.206  |
| A009107_01 |    | -1.846    | -1.701   | -0.225    | -0.155    | -1.673    | -1.329 | -0.223    | -0.304 |
| A009112_01 |    | -0.222 NA |          | -0.23 NA  |           | -0.053 NA |        | -0.212 NA |        |
| A009113_01 |    | -0.163    | -0.078   | -0.346    | -0.195    | 0.069     | 0.106  | -0.021    | 0.191  |
| A009114_01 |    | -0.572    | -0.567   | 0.229     | 0.281     | -0.501    | -0.534 | -0.54     | -0.426 |
| A009121_01 | NA | NA        |          | 0.547     | 0.295 NA  | NA        |        | 0.279     | -0.001 |
| A009127_01 | NA | NA        |          | 0.011     | 0.062 NA  | NA        |        | -0.863    | -0.889 |
| A009134_01 |    | 0.39      | 0.046 NA | NA        |           | 0.165     | 0.021  | 0.471 NA  |        |
| A009138_01 |    | 0.144     | 0.058    | -0.878    | -0.632    | -0.202    | -0.267 | -0.633    | -0.44  |
| A009139_01 |    | -1.34     | -0.96    | -0.577    | -0.396    | -1.351    | -1.047 | -0.788    | -0.546 |
| A009145_01 |    | 0.923     | 0.534    | 0.123     | 0.108     | 0.682     | 0.513  | 0.524     | 0.316  |
| A009147_01 |    | -1.106    | -1.705   | -1.333    | -0.857    | -1.497    | -1.59  | -1.199    | -1.253 |
| A009148_01 |    | -0.962    | -1.194   | -0.67     | -0.526 NA |           | -1.197 | -1.256    | -1.265 |
| A009151_01 | NA | NA        |          | 0.455     | 0.471 NA  | NA        |        | -0.137 NA |        |
| A009152_01 |    | -0.49     | -0.318   | -0.034    | 0.068     | -0.303    | -0.237 | 0.042     | -0.039 |
| A009153_01 |    | -0.942    | -0.359   | 0.398     | 0.191     | -0.309    | 0.507  | 0.865     | 0.754  |
| A009156_01 |    | 0.801     | 0.677    | 0.208     | 0.166     | 0.559     | 0.428  | 0.783     | 0.722  |

|            |    |        |        |        |        |        |        |        |        |
|------------|----|--------|--------|--------|--------|--------|--------|--------|--------|
| A009163_01 |    | -0.059 | -0.08  | -0.11  | -0.062 | -0.009 | 0.087  | -0.12  | -0.044 |
| A009165_01 |    | -1.157 | -1.294 | -0.029 | -0.113 | -0.284 | -0.35  | 0.258  | -0.061 |
| A009169_01 | NA |        | NA     | 0.737  | 0.735  | 1.544  | 1.549  | 0.876  | 1.038  |
| A009176_01 |    | -0.057 | 0.025  | 0.441  | 0.444  | -0.23  | -0.158 | -0.419 | -0.579 |
| A009182_01 |    | -0.326 | -0.182 | -0.315 | -0.186 | 0.26   | 0.242  | 0.269  | 0.349  |
| A009187_01 |    | -0.058 | 0.611  | 0.31   | 0.461  | -0.04  | 0.424  | 0.083  | 0.325  |
| A009189_01 |    | -0.065 | -0.007 | -0.697 | NA     | -0.263 | -0.42  | NA     | NA     |
| A009196_01 |    | -0.164 | -0.453 | -0.691 | -0.435 | -0.541 | -0.632 | -0.424 | -0.387 |
| A009203_01 | NA |        | -0.4   | 0.003  | -0.055 | NA     |        | -0.056 | -0.187 |
| A009205_01 |    | -0.077 | 0.026  | 0.253  | NA     | 0.42   | 0.458  | 0.846  | 0.867  |
| A009221_01 |    | 0.201  | -0.071 | 0.496  | 0.375  | 0.493  | 0.261  | 0.337  | 0.352  |
| A009227_01 |    | 0.365  | 0.52   | 0.12   | 0.363  | 0.212  | 0.199  | -0.165 | 0.114  |
| A009233_01 |    | 0.37   | 0.162  | 0.124  | 0.263  | 0.556  | 0.617  | 0.763  | 0.86   |
| A009248_01 |    | 0.311  | NA     | 0.032  | -0.067 | 0.36   | NA     |        | 0.13   |
| A009255_01 |    | 0.396  | 0.221  | -0.023 | -0.005 | -0.13  | 0.1    | 0.272  | 0.27   |
| A009256_01 |    | -1.225 | -1.564 | -0.658 | -0.679 | -0.886 | -1.04  | -0.809 | -0.998 |
| A009257_01 |    | 0.303  | -0.045 | -0.011 | 0.036  | 0.186  | -0.012 | 0.042  | 0      |
| A009260_01 |    | -0.059 | -0.147 | -0.271 | -0.025 | 0.151  | 0.156  | 0.574  | 0.71   |
| A009262_01 |    | -0.81  | -0.175 | -0.146 | -0.238 | -0.481 | -0.091 | -0.183 | -0.249 |
| A009270_01 | NA |        | NA     | -0.312 | NA     | NA     |        | -0.224 | NA     |
| A009272_01 |    | 0.926  | 0.974  | -0.435 | -0.146 | 0.229  | 0.747  | 0.229  | 0.707  |
| A009273_01 | NA |        | -0.172 | 0.132  | 0.009  | -0.198 | -0.274 | -0.552 | -0.549 |
| A009281_01 | NA |        | NA     | 0.362  | 0.394  | NA     | NA     | -0.149 | -0.193 |
| A009282_01 |    | 0.417  | 0.035  | -0.201 | -0.253 | 0.037  | -0.28  | 0.057  | -0.162 |
| A009284_01 |    | 0.026  | NA     | -0.643 | -0.517 | 0.061  | NA     | -0.133 | -0.189 |
| A009289_01 |    | 0.658  | 0.408  | 0.173  | 0.217  | 0.017  | -0.084 | -0.072 | -0.088 |
| A009293_01 | NA |        | 0.247  | 0.244  | 0.202  | 0.48   | 0.428  | 0.209  | 0.253  |
| A009296_01 |    | -0.318 | -1.083 | 0.404  | 0.502  | -0.182 | -0.117 | -0.071 | -0.047 |
| A009303_01 |    | 0.521  | 0.474  | -0.006 | 0.108  | -0.123 | 0.12   | 0.052  | 0.197  |
| A009305_01 | NA |        | NA     | 0.351  | 0.354  | 0.06   | 0.262  | 0.084  | 0.272  |
| A009307_01 |    | -0.525 | -0.918 | -0.899 | -0.695 | -0.814 | -0.69  | -0.519 | -0.719 |
| A009309_01 |    | 0.444  | 0.252  | 0.14   | -0.098 | 0.364  | 0.305  | 0.47   | 0.383  |
| A009312_01 |    | -0.421 | -0.367 | 0.286  | 0.278  | 0.024  | 0.06   | -0.036 | -0.088 |
| A009325_01 |    | -0.84  | -1.219 | -0.4   | -0.144 | -1.996 | -1.704 | -1.36  | NA     |
| A009328_01 |    | -1.089 | -0.567 | -0.43  | -0.333 | -0.158 | 0.012  | -0.073 | -0.068 |
| A009340_01 |    | -0.473 | -0.666 | -1.293 | NA     | -0.678 | -1.121 | -0.791 | -0.82  |
| A009343_01 |    | 0.159  | 0.195  | -0.247 | -0.081 | 0.167  | 0.263  | 0.406  | 0.524  |
| A009348_01 | NA |        | NA     | 0.226  | 0.268  | NA     | NA     | -0.48  | -0.507 |
| A009353_01 |    | 0.802  | 0.59   | -0.198 | -0.143 | 0.331  | 0.605  | 0.109  | 0.45   |
| A009354_01 |    | 0.418  | 0.279  | 0.212  | 0.268  | 0.217  | 0.277  | 0.051  | 0.175  |
| A009368_01 |    | 0.376  | 0.447  | 0.365  | 0.234  | 0.256  | 0.098  | 0.108  | -0.01  |
| A009369_01 |    | 0.372  | -0.22  | -0.62  | -0.49  | -0.414 | -1.014 | -0.713 | -0.612 |
| A009370_01 |    | -0.882 | NA     | 0.165  | 0.242  | 0.1    | 0.107  | 0.128  | 0.067  |
| A009371_01 |    | -0.323 | -0.618 | -0.042 | 0.022  | -0.147 | -0.37  | -0.124 | -0.326 |
| A009375_01 |    | -0.198 | 0.217  | 0.176  | 0.046  | 0.645  | 0.276  | 0.514  | 0.386  |
| A009377_01 |    | -0.249 | NA     | 0.166  | 0.107  | 0.073  | NA     | -0.003 | 0.009  |
| A009378_01 |    | 0.135  | 0.383  | 0.131  | 0.169  | 0.322  | 0.519  | 0.366  | 0.463  |
| A009380_01 |    | 0.624  | 0.415  | -0.039 | 0.113  | 0.427  | 0.381  | 0.335  | 0.387  |
| A009390_01 |    | 0.268  | 0.118  | -0.007 | 0.024  | -0.009 | 0.097  | 0.029  | 0.024  |
| A009396_01 |    | 0.429  | NA     | 0.228  | NA     | 0.283  | NA     | -0.04  | NA     |
| A009398_01 | NA |        | NA     | 0.092  | 0.103  | -0.08  | NA     | -0.16  | -0.166 |
| A009399_01 |    | -0.079 | 0.112  | -0.098 | -0.097 | 0.235  | 0.179  | 0.25   | 0.413  |
| A009402_01 |    | 0.26   | NA     | 0.173  | NA     | 0.494  | NA     | -0.266 | NA     |
| A009409_01 |    | 0.476  | 0.624  | 0.62   | 0.505  | 0.524  | 0.345  | 0.213  | 0.134  |
| A009410_01 |    | 0.262  | 0.774  | -0.351 | 0.009  | -0.238 | 0.346  | 0.047  | 0.807  |
| A009411_01 |    | -1.004 | -0.615 | -0.083 | -0.164 | -0.747 | -0.446 | -0.36  | -0.554 |
| A009413_01 |    | 0.724  | 0.14   | -0.345 | NA     | -0.301 | -0.514 | NA     | NA     |
| A009414_01 |    | 0.363  | 0.241  | -0.205 | -0.193 | -0.261 | -0.134 | -0.112 | -0.141 |
| A009415_01 |    | 0.165  | NA     | 0.173  | 0.109  | NA     | NA     | NA     | NA     |
| A009426_01 |    | 0.385  | 0.658  | 0.171  | 0.158  | 0.122  | 0.206  | -0.17  | -0.387 |
| A009431_01 | NA |        | NA     | -0.513 | -0.179 | NA     | NA     | NA     | NA     |
| A009432_01 |    | 0.291  | NA     | 0.177  | 0.036  | -0.122 | NA     | 0.199  | 0.009  |
| A009434_01 | NA |        | -0.251 | -0.104 | -0.111 | -0.414 | NA     |        | -0.248 |
| A009435_01 |    | 0.084  | 0.784  | 0.071  | 0.318  | 0.134  | 0.722  | 0.644  | 0.98   |
| A009448_01 |    | 0.506  | 0.44   | -0.153 | -0.039 | 0.051  | 0.046  | -0.026 | 0.16   |
| A009454_01 | NA |        | NA     | -0.517 | -0.444 | NA     | NA     | -0.385 | -0.454 |
| A009457_01 | NA |        | NA     | 0.118  | -0.01  | NA     | NA     | 0.078  | -0.037 |
| A009475_01 |    | -0.134 | -0.011 | -0.139 | 0.027  | -0.11  | -0.038 | -0.011 | 0.142  |

|            |    |           |           |           |           |           |           |           |        |
|------------|----|-----------|-----------|-----------|-----------|-----------|-----------|-----------|--------|
| A009480_01 |    | -0.633    | -1.18     | -0.161    | -0.381    | -0.535    | -0.535    | -0.18     | -0.44  |
| A009485_01 | NA | NA        |           | 0.42      | 0.18 NA   | NA        |           | 0.029     | -0.077 |
| A009491_01 | NA | NA        |           | -0.657 NA | NA        |           | -0.653    | -0.609    | -0.424 |
| A009495_01 | NA |           | -0.401    | -0.054    | -0.089 NA |           | -0.814    | -0.518    | -0.449 |
| A009496_01 | NA | NA        |           | -0.399    | -0.333 NA | NA        |           | -0.332 NA |        |
| A009497_01 | NA | NA        |           | -0.434    | -0.29     | -0.339 NA |           | -0.17     | -0.272 |
| A009498_01 |    | -0.313    | -0.525    | -0.052    | 0.096     | -0.797    | -0.878    | -0.693    | -0.616 |
| A009501_01 |    | 0.449     | 0.884     | 0.457     | 0.507     | 0.742     | 0.904     | 0.743     | 1.085  |
| A009502_01 | NA | NA        |           | 0.144     | 0.147 NA  | NA        |           | -0.049    | -0.182 |
| A009506_01 |    | 0.214     | 0.372     | 0.032     | 0.012     | 0.676     | 0.617     | 0.554     | 0.613  |
| A009507_01 |    | 0.533 NA  |           | 0.527     | 0.195     | 0.769 NA  |           | -0.058    | -0.057 |
| A009512_01 |    | -0.043    | -0.304    | -0.284    | -0.21     | -0.444    | -0.267    | -0.418    | -0.428 |
| A009513_01 |    | 0.214 NA  |           | 0.258     | 0.237     | 0.737     | 0.325     | 0.181     | 0.278  |
| A009514_01 | NA | NA        |           | 0.314     | 0.434 NA  | NA        |           | -0.505    | -0.218 |
| A009515_01 |    | 0.309     | 0.327     | 0.06      | 0.046     | 1.373     | 1.258     | 1.536     | 1.93   |
| A009517_01 |    | -0.195    | -0.344    | -0.729    | -0.57     | -0.626    | -0.697    | -0.415    | -0.298 |
| A009523_01 |    | 0.28      | 0.009     | -0.275    | -0.235    | 0.63      | 0.586     | 0.213     | 0.256  |
| A009525_01 |    | -1.455    | -0.281    | 0.189     | -0.195    | -0.427    | 0.053     | 0.29      | 0.206  |
| A009530_01 |    | -0.876    | -0.835    | -0.69     | -0.623    | -0.173    | -0.243    | -0.392    | -0.192 |
| A009531_01 |    | 0.382     | -0.129    | -0.263    | -0.442    | 0.036     | -0.213    | -0.109    | -0.325 |
| A009534_01 |    | -0.486    | -0.337    | -0.515    | -0.438    | -0.209    | -0.079    | 0.007     | -0.077 |
| A009537_01 |    | 0.503     | 0.37      | -0.146    | -0.038    | 0.108     | -0.1      | -0.158    | -0.142 |
| A009540_01 | NA | NA        |           | -0.452 NA | NA        | NA        | NA        |           | 0.242  |
| A009542_01 | NA | NA        |           | 0.152     | 0.278 NA  | NA        |           | -0.274 NA |        |
| A009543_01 |    | -0.445    | -0.794    | -0.92     | -0.648    | -0.788    | -0.94     | -0.718    | -0.478 |
| A009544_01 |    | 1.303     | 0.945     | -0.344 NA |           | 0.557     | 0.354 NA  |           | 0.612  |
| A009545_01 |    | 0.332 NA  |           | 0.215 NA  |           | 0.803 NA  | NA        |           | 0.398  |
| A009548_01 | NA | NA        |           | 0.183     | -0.023 NA | NA        |           | 0.118     | 0.182  |
| A009549_01 |    | 0.167     | -0.079    | -0.401    | -0.403    | -0.202    | -0.271    | -0.315    | -0.226 |
| A009551_01 |    | -0.069    | 0.133     | -0.12     | 0.038     | 0.008     | 0.407     | 0.085     | 0.354  |
| A009557_01 |    | -0.226    | 0.188     | -0.151    | -0.179    | 0.414     | 0.432     | 0.235     | 0.058  |
| A009560_01 |    | 0.447     | 0.226     | 0.095     | -0.107    | 0.196     | 0         | 0.093     | -0.057 |
| A009561_01 |    | 0.092 NA  |           | 0.15      | 0.303     | 0.027 NA  |           | 0.152     | 0.177  |
| A009563_01 |    | 0.285     | 0.065     | 0.032     | -0.077    | 0.155     | -0.026    | -0.041    | -0.086 |
| A009566_01 |    | -0.649 NA |           | -0.307    | -0.31     | -0.761    | -0.74     | -0.566    | -0.795 |
| A009567_01 |    | 0.471     | 0.235     | -0.355    | -0.037    | 0.075     | 0.011     | 0.029     | 0.196  |
| A009568_01 | NA | NA        |           | -0.819    | -0.695 NA | NA        |           | -0.406    | -0.493 |
| A009573_01 |    | 0.044     | 0.121     | 0.075     | -0.009    | 0.187     | 0.333     | -0.087    | 0.1    |
| A009579_01 |    | -0.153    | -0.063    | 0.08      | -0.009    | -0.485    | -0.322    | 0.222     | 0.164  |
| A009580_01 |    | 0.834     | 0.607     | 0.066     | 0.247     | 0.316     | 0.574     | 0.277     | 0.487  |
| A009581_01 |    | -0.966 NA |           | -0.105    | -0.035    | -0.316    | -0.354 NA | NA        |        |
| A009583_01 |    | 0.538     | 0.678     | 0.689     | 0.521     | 0.647     | 0.646     | 0.457     | 0.396  |
| A009590_01 |    | -1.199    | -0.531    | -0.816    | -0.694    | -0.749    | -0.643    | -0.8      | -0.642 |
| A009594_01 |    | -0.11     | -0.068    | 0.354     | 0.196     | 0.573     | 0.46      | 0.597     | 0.606  |
| A009595_01 |    | 0.098     | 0.009     | -0.668 NA |           | 0.338     | 0.128     | 0.103     | 0.387  |
| A009603_01 |    | 0.25      | -0.244    | -0.127    | -0.004    | 0.769     | 0.477     | 0.283     | 0.494  |
| A009609_01 | NA | NA        |           | -0.413    | -0.263    | 0.909     | 0.753     | 0.681     | 0.652  |
| A009611_01 |    | -0.193    | 0.018     | -0.059    | -0.163    | -0.061    | 0.088     | 0.312     | 0.242  |
| A009614_01 |    | 0.126     | 0.129     | -0.104    | -0.039    | 0.463     | 0.151     | 0.06      | -0.115 |
| A009618_01 |    | -0.998    | -1.177 NA | NA        |           | -1.059 NA | NA        | NA        |        |
| A009619_01 |    | -0.558    | -0.451    | -0.003    | -0.024    | -0.025    | -0.101    | -0.103    | 0.025  |
| A009625_01 |    | 0.483     | 0.478     | -0.307 NA |           | 0.662 NA  |           | 0.214 NA  |        |
| A009627_01 |    | 0.439     | 0.447     | -0.054    | 0.146     | 0.771     | 0.484     | 0.243     | 0.21   |
| A009632_01 | NA | NA        |           | -0.388    | -0.155 NA | NA        |           | -0.675    | -0.657 |
| A009633_01 |    | 0.283     | 0.405     | -0.027    | 0.005     | 0.052     | -0.052    | -0.316    | -0.116 |
| A009639_01 |    | 0.226     | 0.087     | 0.448     | 0.442     | 0.317     | 0.236     | 0.45      | 0.561  |
| A009641_01 |    | -0.153    | 0.08      | 0.073     | 0.163     | 0.24      | 0.326     | 0.005     | 0.308  |
| A009660_01 |    | 0.833     | 0.563     | -0.643    | -0.303    | -0.351    | -0.57     | -0.31     | -0.135 |
| A009661_01 |    | 0.174     | 0.063     | -0.517 NA |           | 0.375     | -0.035    | 0.17      | 0.364  |
| A009663_01 | NA | NA        |           | 0.027     | 0.175     | -0.167    | 0.227     | 0.116     | 0.242  |
| A009665_01 |    | -0.074    | 0.112     | 0.165     | 0.383     | 0.226     | 0.787     | 0.159     | 0.608  |
| A009670_01 |    | 0.017     | -0.056    | -0.14     | -0.153    | -0.01     | -0.064    | -0.032    | -0.205 |
| A009676_01 |    | 0.068     | 0.028     | -0.811    | -0.51     | 0.094     | -0.408    | -0.578    | -0.381 |
| A009682_01 |    | 0.067     | -0.012    | -0.092    | -0.094    | -0.09     | -0.068    | -0.11     | -0.215 |
| A009684_01 |    | -0.894    | -0.604    | 0.005     | 0.053     | -0.363    | -0.283    | -0.425    | -0.427 |
| A009688_01 |    | 0.345 NA  |           | -0.369    | -0.097    | -0.255 NA |           | -0.329    | -0.182 |
| A009691_01 |    | -0.282    | 0.096     | 0.33      | 0.244     | 0.066     | 0.169     | 0.057     | 0.041  |
| A009693_01 | NA | NA        |           | 0.224     | 0.167 NA  | NA        |           | -0.543    | -0.428 |

|            |    |           |        |           |           |           |        |           |  |        |  |    |
|------------|----|-----------|--------|-----------|-----------|-----------|--------|-----------|--|--------|--|----|
| A009699_01 |    | 0.356 NA  |        | 0.073 NA  |           | NA        |        | NA        |  | NA     |  | NA |
| A009711_01 |    | -0.084    | -0.158 | -0.141    | -0.162    | -0.088    | -0.135 | 0.025     |  | -0.07  |  |    |
| A009713_01 |    | -0.84     | -0.959 | 0.053     | -0.145    | -0.444    | -0.662 | -0.054    |  | -0.42  |  |    |
| A009728_01 |    | 0.858     | 0.627  | 0.579     | 0.562     | 0.4       | 0.424  | 0.203 NA  |  |        |  |    |
| A009731_01 |    | -0.915    | -0.48  | 0.276     | 0.181     | -0.116    | -0.152 | -0.125    |  | -0.205 |  |    |
| A009733_01 | NA |           |        | -0.247    | -0.21 NA  |           | -0.078 | 0.307     |  | 0.386  |  |    |
| A009737_01 |    | -0.331    | -0.113 | 0.149     | 0.213     | 0.21 NA   |        | 0.005     |  | 0.175  |  |    |
| A009738_01 | NA |           |        | 0.15      | 0.197     | 0.799     | 0.753  | 0.414     |  | 0.618  |  |    |
| A009740_01 |    | 0.163     | 0.357  | 0.201     | 0.214     | 0.659     | 0.481  | 0.594     |  | 0.589  |  |    |
| A009744_01 |    | -0.876    | -1.014 | -0.542    | -0.469    | -0.468    | -0.488 | -0.809    |  | -0.805 |  |    |
| A009746_01 |    | 0.235     | 0.105  | -0.232    | -0.275    | 0.188     | -0.402 | -0.064    |  | -0.235 |  |    |
| A009751_01 |    | -0.103    | -0.308 | -0.627    | -0.671    | -0.267    | -0.338 | -0.317    |  | -0.41  |  |    |
| A009752_01 |    | 0.736     | 0.711  | -0.669    | -0.498 NA |           |        | -0.807    |  | -0.909 |  |    |
| A009753_01 | NA |           |        | -1.338    | -0.921 NA |           |        | -1.26 NA  |  |        |  |    |
| A009755_01 | NA |           |        | -0.058 NA |           | -0.174 NA |        |           |  |        |  |    |
| A009761_01 |    | -0.595    | -0.522 | -0.142    | -0.175    | -0.309    | -0.272 | -0.288    |  | -0.282 |  |    |
| A009762_01 |    | 0.221 NA  |        | 0.265     | 0.334     | 0.248 NA  |        | 0.151     |  | 0.132  |  |    |
| A009764_01 |    | 0.641     | 0.401  | -0.115    | 0.109     | 0.214     | 0.231  | 0.043     |  | 0.271  |  |    |
| A009765_01 |    | 0.213     | 0.218  | 0.327     | 0.122     | 0.645     | 0.245  | 0.457     |  | 0.25   |  |    |
| A009766_01 |    | -0.386 NA |        | -0.486    | -0.298    | 0.309 NA  |        | 0.331     |  | 0.254  |  |    |
| A009769_01 |    | -0.249    | -0.406 | -0.189    | -0.105    | 0.06      | 0.016  | -0.056    |  | 0.058  |  |    |
| A009770_01 |    | 1.071 NA  |        | 0.326     | 0.267     | 0.464 NA  |        |           |  |        |  |    |
| A009776_01 |    | 1.159     | 1.159  | 0.154     | 0.268     | 0.728     | 0.717  | 0.753     |  | 1.047  |  |    |
| A009777_01 |    | -0.063    | 0.264  | -0.333    | -0.24     | 0.348     | 0.297  | 0.355     |  | 0.455  |  |    |
| A009780_01 |    | -0.455    | -0.111 | 0.433     | 0.375     | -0.288    | 0.089  | -0.199    |  | -0.1   |  |    |
| A009784_01 | NA |           |        | 0.349     | 0.367     | -0.302 NA |        | -0.05 NA  |  |        |  |    |
| A009787_01 | NA |           |        | 0.35      | 0.369 NA  |           |        | 0.221     |  | 0.382  |  |    |
| A009790_01 |    | 0.326     | 0.392  | -0.373    | -0.265    | 0.178     | 0.18   | -0.074    |  | 0.116  |  |    |
| A009792_01 |    | 0.388     | 0.155  | -0.09     | -0.045    | -0.204    | -0.11  | -0.367    |  | -0.247 |  |    |
| A009796_01 |    | 0.637     | 0.449  | 0.267     | 0.292     | 0.038     | 0.126  | 0.103     |  | 0.281  |  |    |
| A009797_01 | NA |           |        | 0.383     | 0.198 NA  |           |        | -0.576    |  | -0.761 |  |    |
| A009803_01 |    | 0.419     | 0.536  | 0.481     | 0.46      | 0.001     | -0.03  | 0.038     |  | -0.032 |  |    |
| A009805_01 |    | -0.263 NA |        | 0.442     | 0.116     | 0.351     | 0.102  | 0.25      |  | 0.064  |  |    |
| A009809_01 |    | 0.32      | 0.272  | -0.046    | 0.175     | 0.347     | 0.106  | 0.166     |  | 0.425  |  |    |
| A009811_01 |    | 0.473     | 0.48   | 0.371     | 0.446     | 0.463     | 0.541  | 0.406     |  | 0.465  |  |    |
| A009821_01 | NA |           |        | 0.03      | -0.051    | 0.269     | 0.021  | -0.098    |  | -0.068 |  |    |
| A009822_01 |    | 0.189     | -0.034 | 0.087     | 0.13      | -0.194    | -0.274 | -0.02     |  | -0.023 |  |    |
| A009826_01 | NA |           |        | -0.139 NA |           |           |        | 0.459 NA  |  |        |  |    |
| A009834_01 |    | -0.158    | -0.306 | -0.372    | -0.321    | -0.404    | -0.293 | -0.222    |  | -0.412 |  |    |
| A009836_01 |    | 1.007     | 0.812  | 0.593     | 0.514     | 0.996     | 0.631  | 0.82      |  | 0.776  |  |    |
| A009843_01 |    | 0.435     | 0.485  | 0.064     | 0.177     | 0.454     | 0.544  | 0.05      |  | 0.179  |  |    |
| A009845_01 |    | 0.983     | 0.596  | 0.435     | 0.416     | 0.516     | 0.838  | 0.952     |  | 1.121  |  |    |
| A009846_01 |    | 0.554     | 0.321  | -0.076    | -0.136    | 0.493     | 0.457  | 0.741     |  | 0.584  |  |    |
| A009848_01 |    | -0.619    | -0.034 | 0.007     | 0.109     | 0.304     | 0.188  | 0.39      |  | 0.413  |  |    |
| A009849_01 |    | 0.061     | -0.015 | 0.096     | 0.136     | -0.238    | 0.051  | 0.014     |  | 0.173  |  |    |
| A009855_01 |    | 0.317     | 0.348  | -0.023 NA |           | 0.063 NA  |        | 0.525     |  | 0.54   |  |    |
| A009864_01 | NA |           |        | -0.012    | -0.038 NA |           |        | -0.443 NA |  |        |  |    |
| A009867_01 |    | -0.335    | -0.043 | -0.14     | -0.07     | -0.368    | -0.119 | -0.459    |  | -0.51  |  |    |
| A009868_01 |    | 0.115     | -0.237 | -0.45     | -0.449    | 0.017     | -0.115 | 0.113     |  | -0.103 |  |    |
| A009870_01 | NA |           |        | 0.111     | 0.034 NA  |           |        | 0.164     |  | 0.087  |  |    |
| A009879_01 |    | -0.17     | -0.452 | -0.868    | -0.575    | -0.542    | -0.225 | -0.35     |  | 0.107  |  |    |
| A009885_01 |    | -0.996    | -0.156 | 0.102     | 0.011     | 0.471     | 0.29   | 0.214     |  | 0.066  |  |    |
| A009890_01 |    | -1.797    | -1.259 | -0.608    | -0.295    | -0.917    | -0.773 | -0.415    |  | -0.511 |  |    |
| A009894_01 |    | -0.3      | -0.315 | 0.43      | 0.429     | -0.255    | -0.317 | -0.223    |  | -0.257 |  |    |
| A009895_01 |    | 0.281     | 0.078  | -0.444    | -0.343    | -0.14     | -0.086 | 0.286     |  | 0.211  |  |    |
| A009898_01 |    | 0.408     | 0.171  | -0.062    | -0.184    | 0.185     | 0.006  | 0.233     |  | 0.07   |  |    |
| A009900_01 |    | 0.88      | 0.913  | 0.737     | 0.562     | 0.995     | 1.017  | 0.878     |  | 0.964  |  |    |
| A009902_01 |    | 0.471     | 0.108  | 0.167     | 0.256     | 0.162     | -0.131 | -0.138    |  | -0.04  |  |    |
| A009905_01 |    | 0.504     | 0.098  | 0.274     | 0.291     | -0.362    | -0.542 | -0.337    |  | -0.276 |  |    |
| A009906_01 |    | -0.022    | 0.032  | -0.353    | -0.208    | 0.204     | 0.498  | 0.266     |  | 0.368  |  |    |
| A009911_01 |    | 0.085     | -0.408 | -0.453    | -0.372    | -0.435    | -0.784 | -0.239    |  | -0.448 |  |    |
| A009916_01 |    | 0.528     | 0.321  | -0.302    | -0.372    | 0.08      | 0.001  | -0.043    |  | -0.056 |  |    |
| A009920_01 |    | 0.001     | -0.149 | -0.125    | -0.057    | 0.215     | 0.099  | 0.078     |  | 0.165  |  |    |
| A009926_01 | NA |           |        | 0.583     | 0.479     | 0.607     | 0.629  | 0.752     |  | 0.799  |  |    |
| A009927_01 |    | 0.096     | -0.364 | 0.067     | 0.047     | -0.442    | -0.758 | -0.31     |  | -0.433 |  |    |
| A009934_01 | NA |           |        | 0.315     | 0.251 NA  |           |        |           |  |        |  |    |
| A009939_01 | NA |           |        | -0.121    | -0.122 NA |           |        | 0.138     |  | -0.045 |  |    |
| A009941_01 |    | -0.095    | 0.064  | -0.122    | -0.106    | 0.42      | 0.607  | 0.677     |  | 0.654  |  |    |

|            |    |        |        |        |        |        |        |        |        |
|------------|----|--------|--------|--------|--------|--------|--------|--------|--------|
| A009948_01 |    | -0.681 | -0.644 | 0.011  | -0.054 | -0.797 | -0.481 | -0.234 | -0.435 |
| A009949_01 |    | 0.496  | 0.339  | -0.361 | -0.167 | -0.082 | 0.046  | -0.128 | 0.089  |
| A009956_01 |    | -0.781 | -0.433 | -0.382 | -0.212 | 0.303  | 0.281  | 0.499  | 0.538  |
| A009958_01 |    | 0.576  | 0.259  | -0.164 | -0.053 | -0.094 | -0.084 | -0.036 | 0.171  |
| A009960_01 | NA |        | NA     | 0.01   | -0.127 | NA     | -0.039 | 0.016  | 0.032  |
| A009964_01 |    | -0.003 | -0.063 | 0.186  | -0.084 | -0.016 | -0.054 | 0.041  | -0.073 |
| A009965_01 |    | 0.317  | 0.103  | -0.375 | -0.412 | -0.779 | -0.621 | -0.405 | -0.592 |
| A009968_01 |    | 0.424  | 0.223  | 0.402  | 0.253  | 0.488  | 0.145  | 0.072  | 0.016  |
| A009979_01 |    | 0.319  | 0.348  | 0.4    | 0.267  | 0.375  | 0.463  | 0.361  | 0.249  |
| A009988_01 |    | -0.32  | NA     | 0.387  | 0.275  | 0.691  | 0.642  | 0.816  | 0.657  |
| A009989_01 |    | 0.447  | 0.524  | -0.047 | -0.014 | 0.828  | 0.765  | 0.567  | 0.607  |
| A009990_01 |    | -0.144 | -0.491 | -0.184 | -0.097 | -0.473 | -0.569 | -0.272 | -0.215 |
| A009991_01 |    | 0.431  | NA     | -0.242 | -0.215 | NA     |        | -0.159 | -0.185 |
| A009994_01 |    | 0.045  | 0.157  | 0.18   | 0.065  | 0.202  | -0.034 | -0.033 | -0.13  |
| A009997_01 | NA |        | NA     | -0.041 | 0.075  | 0.1    | 0.153  | 0.062  | 0.139  |
| A010000_01 |    | 0.393  | 0.208  | -0.297 | -0.146 | -0.11  | 0.054  | 0.089  | 0.298  |
| A010007_01 |    | 0.379  | NA     | 0.513  | 0.474  | NA     | 0.421  | -0.048 | NA     |
| A010011_01 |    | 0.271  | 0.239  | -0.681 | -0.578 | 0.075  | -0.037 | -0.252 | -0.342 |
| A010018_01 | NA |        | NA     | 0.159  | 0.168  | NA     | NA     | -0.08  | -0.148 |
| A010021_01 |    | -0.211 | -0.105 | 0.018  | 0.127  | -0.02  | -0.04  | -0.097 | 0.057  |
| A010023_01 |    | 0.619  | 0.378  | -0.666 | NA     | -0.16  | -0.116 | NA     | NA     |
| A010025_01 | NA |        | NA     | 0.202  | -0.001 | NA     | -0.206 | 0.079  | -0.225 |
| A010027_01 |    | 0.437  | 0.305  | 0.139  | 0.125  | NA     | NA     |        | 0.077  |
| A010028_01 |    | 0.299  | 0.315  | 0.285  | 0.188  | -0.179 | -0.058 | 0.115  | 0.014  |
| A010033_01 |    | -0.765 | -0.627 | 0.035  | 0.016  | -0.333 | -0.269 | -0.259 | -0.26  |
| A010040_01 |    | 0.424  | -0.175 | 0.021  | 0.065  | -0.087 | -0.473 | -0.162 | 0.095  |
| A010042_01 |    | 0.486  | 0.158  | 0.409  | 0.315  | 0.266  | -0.064 | -0.045 | -0.204 |
| A010044_01 |    | -0.017 | -0.112 | 0.036  | 0.041  | -0.28  | -0.301 | -0.444 | -0.585 |
| A010047_01 | NA |        | 0.138  | 0.107  | 0.09   | 0.05   | 0.153  | 0.086  | NA     |
| A010048_01 | NA |        | NA     | -0.499 | NA     | NA     | NA     | NA     | NA     |
| A010049_01 |    | 0.085  | 0.101  | 0.026  | -0.097 | 0.335  | 0.178  | 0.272  | 0.184  |
| A010051_01 |    | -0.065 | -0.574 | -1.019 | -0.618 | -0.814 | -0.684 | -0.752 | -0.434 |
| A010059_01 |    | 0.246  | 0.521  | -0.286 | -0.367 | -0.369 | -0.212 | -0.176 | -0.134 |
| A010061_01 |    | -0.504 | -0.364 | 0.11   | 0.119  | -0.205 | -0.323 | -0.167 | -0.124 |
| A010065_01 | NA |        | NA     | -0.111 | -0.191 | -0.576 | NA     | -0.471 | -0.529 |
| A010066_01 |    | -0.174 | 0.216  | -0.434 | -0.365 | 0.104  | -0.004 | 0.119  | 0.262  |
| A010068_01 |    | 0.354  | 0.291  | -0.042 | 0.052  | 0.096  | 0.199  | 0.343  | 0.49   |
| A010172_01 |    | 0.739  | 0.332  | -0.289 | -0.262 | 0.046  | -0.073 | -0.003 | 0.007  |
| A010173_01 |    | -0.288 | 0.205  | 0.266  | 0.384  | 0.095  | 0.342  | -0.051 | 0.093  |
| A010174_01 |    | 0.092  | -0.174 | -0.191 | -0.141 | -0.218 | -0.408 | -0.186 | -0.266 |
| A010190_01 | NA |        | NA     | -0.752 | -0.559 | NA     | NA     | -0.995 | -1.208 |
| A010219_01 | NA |        | NA     | 0.042  | -0.04  | NA     | NA     | -0.16  | -0.338 |
| A010227_01 |    | -0.267 | 0.013  | 0.018  | 0.184  | 0.369  | 0.416  | 0.386  | 0.458  |
| A010255_01 | NA |        | -0.276 | 0.089  | -0.054 | 0.57   | 0.153  | 0      | -0.282 |
| A010261_01 |    | 0.184  | 0.064  | -0.377 | -0.204 | -0.5   | -0.316 | -0.093 | 0.024  |
| A010262_01 |    | -0.212 | 0.263  | 0.348  | 0.38   | 0.147  | 0.32   | 0.144  | 0.168  |
| A010265_01 |    | -0.01  | -0.147 | 0.129  | -0.033 | -0.093 | 0.037  | 0.248  | -0.046 |
| A010270_01 |    | 0.55   | 0.388  | 0.108  | NA     | 0.426  | 0.229  | NA     | 0.441  |
| A010272_01 |    | 0.148  | 0.103  | -0.206 | -0.159 | 0.391  | 0.28   | -0.162 | -0.026 |
| A010274_01 | NA |        | NA     | -0.108 | -0.208 | -0.041 | NA     | 0.189  | 0.166  |
| A010275_01 |    | -0.294 | -0.014 | -0.261 | -0.289 | 0.114  | -0.003 | 0.496  | 0.384  |
| A010276_01 |    | -0.68  | -0.011 | -0.143 | -0.099 | 0.796  | 0.577  | 0.683  | 0.511  |
| A010282_01 | NA |        | NA     | 0.218  | 0.112  | NA     | NA     | 0.152  | 0.028  |
| A010294_01 |    | -0.225 | -0.148 | 0.072  | -0.032 | 0.25   | 0.248  | 0.02   | 0.106  |
| A010296_01 | NA |        | NA     | -0.592 | NA     | -0.553 | -0.51  | -0.751 | NA     |
| A010300_01 |    | -0.562 | -0.527 | -0.614 | NA     | -0.636 | NA     | -0.369 | NA     |
| A010306_01 |    | 0.875  | 0.974  | 0.07   | 0.13   | 1.128  | 1.035  | 0.848  | 1.076  |
| A010307_01 |    | -0.621 | -0.166 | 0.522  | 0.431  | 0.22   | 0.421  | 0.177  | 0.279  |
| A010308_01 | NA |        | NA     | 0.273  | 0.3    | NA     | NA     | -0.321 | -0.213 |
| A010310_01 |    | -0.22  | -0.035 | 0.093  | 0.227  | -0.44  | -0.237 | -0.226 | -0.137 |
| A010313_01 |    | 0.696  | 0.397  | 0.184  | 0.089  | 0.697  | NA     | NA     | 0.406  |
| A010315_01 |    | -0.246 | 0.001  | 0.297  | 0.201  | 0.574  | 0.343  | 0.215  | 0.186  |
| A010316_01 |    | -0.738 | -0.565 | 0.684  | 0.511  | 0.203  | 0.298  | 0.088  | 0.2    |
| A010318_01 |    | -0.341 | -0.138 | 0.507  | 0.52   | 0.078  | 0.385  | 0.384  | 0.439  |
| A010320_01 |    | -0.652 | -0.745 | -0.685 | -0.535 | -1.165 | -1.037 | -0.709 | -0.753 |
| A010323_01 |    | 0.435  | 0.648  | 0.321  | 0.355  | -0.053 | 0.036  | -0.009 | -0.057 |
| A010327_01 |    | 0.369  | 0.219  | -0.023 | 0.06   | -0.083 | 0.104  | 0.063  | 0.017  |
| A010328_01 |    | 1.062  | 0.656  | 0.258  | 0.211  | 0.397  | 0.189  | 0.142  | 0.265  |

|            |        |        |        |        |        |        |        |        |
|------------|--------|--------|--------|--------|--------|--------|--------|--------|
| A010329_01 | -0.331 | NA     | -0.266 | -0.25  | NA     | NA     | 0.342  | 0.286  |
| A010333_01 | -0.963 | -0.252 | 0.322  | 0.263  | -0.399 | 0.115  | 0.006  | 0.079  |
| A010343_01 | 1.148  | 0.902  | 0.554  | 0.518  | 1.097  | 0.984  | 0.712  | 0.834  |
| A010344_01 | 0.026  | -0.104 | -0.064 | -0.031 | 0.091  | -0.097 | -0.108 | -0.037 |
| A010345_01 | -0.438 | -0.119 | -0.232 | -0.138 | 0.061  | 0.013  | 0.336  | 0.19   |
| A010348_01 | 0.002  | 0.175  | 0.214  | 0.431  | 0.717  | 1.077  | 0.351  | 0.994  |
| A010349_01 | 0.132  | 0.194  | 0.174  | 0.072  | 0.195  | 0.128  | 0.218  | 0.173  |
| A010354_01 | 0.447  | 0.607  | 0.561  | 0.695  | 0.742  | 1.064  | NA     | NA     |
| A010359_01 | NA     | NA     | 0.245  | 0.223  | 0.311  | 0.303  | 0.122  | 0.104  |
| A010362_01 | NA     | NA     | 0.315  | 0.482  | NA     | NA     | -0.338 | -0.235 |
| A010363_01 | -0.596 | -0.273 | -0.097 | 0.027  | 0.299  | 0.075  | 0.141  | 0.065  |
| A010365_01 | -0.956 | -0.993 | -0.674 | -0.508 | -0.856 | -0.897 | -0.62  | -0.72  |
| A010369_01 | -0.459 | -0.558 | -0.162 | -0.218 | -0.867 | -0.699 | -0.373 | -0.662 |
| A010371_01 | NA     | NA     | 0.565  | 0.246  | NA     | NA     | 0.361  | 0.013  |
| A010374_01 | -1.002 | NA     | 0.218  | 0.191  | 0.078  | 0.179  | -0.009 | 0.002  |
| A010377_01 | -0.459 | -0.13  | 0.087  | -0.059 | -0.063 | -0.001 | 0.052  | -0.137 |
| A010378_01 | -1.764 | NA     | -3.055 | -2.263 | -1.551 | -1.29  | -1.611 | -1.925 |
| A010379_01 | 0.296  | 0.406  | 0.045  | 0.085  | 0.289  | 0.309  | -0.137 | 0.003  |
| A010383_01 | -0.153 | 0.1    | 0.152  | 0.059  | 0.341  | 0.797  | 0.659  | 0.613  |
| A010390_01 | 0.156  | 0.021  | -0.36  | -0.372 | 0.303  | 0.281  | 0.029  | -0.119 |
| A010393_01 | -1.624 | NA     | -2.353 | -1.446 | -1.452 | -1.335 | -1.435 | -1.676 |
| A010395_01 | NA     | NA     | -0.186 | -0.266 | NA     | NA     | -0.271 | NA     |
| A010400_01 | 0.541  | 0.42   | 0.495  | 0.538  | 0.727  | 0.511  | 0.241  | 0.172  |
| A010404_01 | NA     | -0.188 | -0.245 | NA     | NA     | -0.594 | NA     | NA     |
| A010411_01 | 0.644  | 0.209  | -0.471 | -0.235 | NA     | -0.013 | -0.027 | 0.159  |
| A010413_01 | NA     | -0.544 | -0.382 | NA     | NA     | NA     | NA     | NA     |
| A010414_01 | -0.027 | 0.306  | -0.124 | 0.084  | -0.159 | 0.807  | 0.675  | 1.003  |
| A010417_01 | NA     | NA     | 0.022  | 0.038  | 0.11   | 0.081  | 0.321  | 0.203  |
| A010420_01 | -0.027 | -0.273 | -0.588 | -0.336 | -0.232 | -0.303 | -0.332 | -0.333 |
| A010425_01 | -0.351 | -0.119 | -0.034 | -0.038 | 0.168  | 0.152  | 0.269  | 0.163  |
| A010433_01 | -0.647 | -0.295 | 0.148  | 0.207  | 0.353  | 0.328  | 0.37   | 0.311  |
| A010434_01 | -0.286 | -0.229 | -0.136 | -0.033 | -0.26  | -0.051 | -0.301 | -0.346 |
| A010441_01 | NA     | NA     | -0.155 | NA     | -0.545 | -0.829 | NA     | NA     |
| A010443_01 | -1.366 | -1.228 | -0.181 | -0.106 | 0.124  | 0.327  | -0.047 | 0.017  |
| A010449_01 | 0.153  | -0.04  | -0.053 | -0.07  | -0.529 | -0.634 | -0.404 | -0.372 |
| A010451_01 | -0.59  | -0.181 | 0.255  | 0.326  | -0.106 | -0.021 | -0.351 | -0.29  |
| A010452_01 | -0.531 | -0.225 | 0.104  | 0.152  | 0.065  | 0.026  | -0.21  | -0.164 |
| A010456_01 | -0.325 | -0.303 | 0.204  | 0.172  | 0.199  | 0.133  | -0.001 | 0.016  |
| A010457_01 | NA     | NA     | -0.012 | NA     | NA     | NA     | 0.228  | 0.028  |
| A010458_01 | 0.315  | 0.258  | -0.261 | -0.111 | 0.019  | 0.065  | 0.036  | 0.009  |
| A010459_01 | NA     | NA     | 0.26   | 0.17   | NA     | NA     | -0.122 | -0.181 |
| A010460_01 | 0.177  | 0.072  | -0.451 | -0.23  | -0.503 | -0.46  | -0.299 | -0.235 |
| A010461_01 | -0.502 | -0.866 | NA     | NA     | -0.903 | NA     | NA     | NA     |
| A010463_01 | 0.73   | 0.338  | -0.625 | -0.448 | 0.095  | -0.176 | -0.415 | -0.248 |
| A010464_01 | -0.997 | -0.573 | 0.561  | 0.41   | 0.367  | 0.335  | 0.106  | -0.026 |
| A010466_01 | -1.135 | NA     | NA     | NA     | -0.043 | NA     | 0.259  | NA     |
| A010467_01 | 0.069  | NA     | -0.585 | -0.493 | -0.243 | NA     | -0.12  | -0.449 |
| A010469_01 | 0.221  | -0.013 | -0.436 | -0.132 | -0.122 | -0.158 | 0.186  | 0.059  |
| A010473_01 | NA     | 0.044  | -0.014 | NA     | 0.183  | NA     | -0.128 | 0.003  |
| A010480_01 | NA     | NA     | 0.06   | 0.152  | NA     | NA     | -0.121 | NA     |
| A010481_01 | 0.333  | 0.499  | 0.715  | 0.603  | 0.34   | 0.213  | 0.192  | 0.279  |
| A010495_01 | -0.006 | 0.018  | 0.443  | 0.342  | 0.565  | 0.508  | 0.714  | 0.723  |
| A010498_01 | NA     | NA     | 0.432  | 0.314  | NA     | NA     | 0.292  | 0.032  |
| A010502_01 | -0.211 | -0.09  | 0.293  | 0.157  | -0.019 | 0.082  | 0.025  | -0.002 |
| A010504_01 | 0.565  | NA     | 0.081  | 0.186  | 0.481  | 0.23   | -0.156 | NA     |
| A010506_01 | 0.06   | -0.245 | -1.662 | -1.285 | -1.22  | -1.268 | NA     | -0.979 |
| A010508_01 | 0.137  | 0.178  | 0.396  | 0.258  | 0.464  | 0.29   | 0.144  | 0.063  |
| A010516_01 | 0.291  | 0.138  | -0.278 | -0.251 | 0.071  | 0.081  | -0.033 | -0.118 |
| A010517_01 | -0.057 | -0.87  | -1.467 | -1.376 | -0.527 | -0.789 | -1.297 | -1.193 |
| A010518_01 | 0.536  | 0.557  | 0.394  | 0.452  | 1.69   | 1.278  | 0.769  | 0.793  |
| A010522_01 | -0.521 | -0.494 | -0.226 | NA     | -0.16  | -0.317 | NA     | NA     |
| A010526_01 | 0.07   | -0.317 | -0.455 | NA     | -0.405 | -0.687 | NA     | -0.583 |
| A010527_01 | 0.629  | 0.52   | 0.37   | 0.367  | 0.458  | 0.286  | -0.045 | -0.079 |
| A010534_01 | -0.094 | -0.014 | 0.361  | NA     | 0.607  | 0.539  | 0.315  | NA     |
| A010535_01 | 0.271  | 0.357  | -0.069 | -0.128 | 0.158  | 0.483  | 0.452  | 0.519  |
| A010538_01 | 0.587  | 0.529  | -0.351 | NA     | 0.257  | 0.229  | 0.137  | NA     |
| A010541_01 | 0.58   | 0.663  | -0.302 | -0.271 | -0.042 | 0.015  | 0.491  | 0.49   |
| A010544_01 | -0.274 | -0.236 | 0.118  | 0.052  | -0.171 | -0.14  | 0.145  | -0.058 |

|            |    |           |           |           |           |           |           |           |        |
|------------|----|-----------|-----------|-----------|-----------|-----------|-----------|-----------|--------|
| A010548_01 |    | -1.192    | -0.902    | -0.223    | -0.166    | -0.721    | -0.879    | -0.493    | -0.699 |
| A010549_01 | NA | NA        |           | 0.127     | 0.026 NA  | NA        |           | -0.36     | -0.373 |
| A010555_01 |    | 0.533     | 0.804     | 0.485     | 0.47      | 0.669     | 0.975     | 0.59      | 0.684  |
| A010557_01 |    | -0.339    | -0.157    | -0.153    | -0.185    | -0.065    | -0.162    | -0.083    | -0.31  |
| A010559_01 |    | -0.079    | -0.308    | -0.655    | -0.528    | -0.315    | -0.244    | -0.41     | -0.172 |
| A010563_01 |    | 0.199     | 0.449     | 0.202     | 0.21      | 0.729     | 0.483     | 0.788     | 0.829  |
| A010564_01 |    | 0.042     | -0.032    | 0.313     | 0.231     | 0.378     | 0.116     | 0.081     | -0.093 |
| A010568_01 |    | -1.071    | -0.264    | -0.009    | 0.011     | 0.026     | 0.143     | -0.21     | 0.022  |
| A010571_01 |    | 0.276 NA  |           | -0.218    | -0.069    | -0.016    | -0.375    | -0.191    | -0.209 |
| A010573_01 |    | -0.009    | 0.042     | 0.124     | 0.117     | 0.192     | 0.069     | 0.291     | 0.017  |
| A010578_01 |    | 0.245     | 0.205     | -0.166    | -0.214    | 0.085     | -0.052    | 0.178     | -0.066 |
| A010579_01 |    | -0.211    | -0.088    | -0.149    | 0.024     | -0.429    | -0.258    | -0.702    | -0.674 |
| A010582_01 |    | 0.461     | 0.427     | -0.498 NA |           | 0.76      | 0.5       | 0.793     | 0.776  |
| A010591_01 | NA | NA        |           | 0.082     | -0.051 NA | NA        |           | -0.213    | -0.183 |
| A010592_01 | NA | NA        |           | 0.01      | -0.153    | -0.228 NA |           | -0.287    | -0.557 |
| A010593_01 |    | 0.445     | 0.201     | -0.406    | -0.396    | -0.037    | 0.106     | 0.101     | 0.239  |
| A010595_01 |    | 0.33      | 0.024     | -0.221    | -0.249    | -0.24     | -0.325    | -0.035    | -0.067 |
| A010599_01 |    | -1.589    | -1.18     | -0.63     | -0.543    | -1.307    | -0.898    | -0.723    | -0.78  |
| A010601_01 |    | 0.877     | 0.704     | -0.527 NA |           | -0.043    | 0.142 NA  |           | 0.278  |
| A010602_01 |    | 0.235 NA  |           | 0.018     | -0.06     | 0.328 NA  |           | 0.151     | 0.01   |
| A010603_01 | NA | NA        |           | 0.294     | -0.015 NA |           | 0.302     | 0.421     | 0.163  |
| A010604_01 | NA | NA        |           | 0.141     | -0.031    | 0.406 NA  | NA        |           | -0.094 |
| A010605_01 |    | -0.179 NA |           | -0.471    | -0.45     | -0.136    | -0.279    | -0.243    | -0.433 |
| A010606_01 |    | -0.121    | 0.016     | 0.285     | 0.314     | 0.559     | 0.515     | 0.607     | 0.563  |
| A010607_01 |    | -0.598 NA |           | 0.159     | 0.262     | -0.113    | -0.151    | -0.299    | -0.211 |
| A010608_01 |    | -0.26     | -0.083    | -0.68     | -0.672    | -0.211    | -0.014    | 0.275     | 0.214  |
| A010611_01 | NA | NA        |           | -0.178 NA |           | 0.226     | 0.327 NA  |           | 0.661  |
| A010612_01 |    | 0.094 NA  |           | 0.035     | 0.231     | 0.28      | 0.131     | 0.103     | 0.087  |
| A010615_01 |    | -0.185    | 0.013     | 0.202     | 0.085     | 0.225     | 0.009     | 0.13      | 0.045  |
| A010616_01 |    | -0.722    | -0.771    | 0.466     | 0.184     | -0.454    | -0.468    | 0.123     | -0.299 |
| A010617_01 |    | 0.38      | 0.407     | 0.305     | 0.176     | 0.355     | 0.316     | 0.321     | 0.25   |
| A010619_01 |    | -0.034    | 0.596     | 0.171     | 0.386     | 0.347     | 0.855     | 0.821     | 1.12   |
| A010624_01 |    | -0.238    | -0.176    | 0.684     | 0.62      | 0.395     | 0.387     | 0.198     | 0.112  |
| A010625_01 |    | -0.394    | -0.109    | 0.002     | 0.018     | 0.269     | 0.204     | 0.093     | 0.166  |
| A010626_01 |    | -0.507    | -0.622    | -0.486    | -0.491    | -0.423    | -0.559    | -0.469    | -0.361 |
| A010628_01 |    | -0.551    | -0.621    | -0.139    | -0.155    | -0.569    | -0.477    | -0.393    | -0.439 |
| A010629_01 |    | -0.687    | -0.716    | -0.338    | -0.268    | -0.716    | -0.823    | -0.587    | -0.693 |
| A010632_01 |    | 1.242     | 1.043     | -0.208 NA |           | 0.859     | 0.769     | 0.991     | 1.013  |
| A010633_01 | NA | NA        |           | -0.071 NA |           | -0.299 NA |           | 0.079 NA  |        |
| A010634_01 |    | -0.892    | -0.634    | 0.002     | -0.052    | -0.323    | -0.352    | -0.276    | -0.272 |
| A010636_01 |    | 0.355     | 0.043     | -0.123    | 0.177     | -0.025    | -0.268    | -0.296    | -0.252 |
| A010637_01 |    | 0.072 NA  |           | 0.136     | -0.106    | 0.507     | 0.229     | 0.33      | 0.081  |
| A010638_01 |    | 0.409     | 0.059     | -0.259    | -0.288    | 0.175     | 0.224     | -0.309    | -0.46  |
| A010643_01 |    | -0.576    | -0.242    | -0.394    | -0.339    | -0.348    | -0.269    | -0.272    | -0.21  |
| A010645_01 |    | -0.091    | 0.048     | -0.44     | -0.271    | -0.318    | -0.164    | -0.064    | -0.1   |
| A010647_01 |    | -0.384    | -0.348    | 0.185     | 0.025     | -0.268    | -0.3      | -0.337    | -0.204 |
| A010648_01 |    | 0.557     | 0.807     | -0.516    | -0.33     | 0.992     | 1.495     | 1.035     | 1.434  |
| A010650_01 |    | -0.182    | 0.154     | -0.309    | -0.314    | -0.115    | 0.103     | 0.763     | 0.594  |
| A010652_01 |    | 0.099     | 0.22      | -0.023    | -0.067    | 0.137     | 0.003     | -0.09     | -0.288 |
| A010656_01 |    | 0.197     | -0.036    | -0.412    | -0.26     | -0.276    | -0.396    | -0.379    | -0.161 |
| A010658_01 |    | -0.991    | -0.964    | 0.614     | 0.63      | -0.499    | -0.373    | -0.357    | -0.337 |
| A010659_01 |    | 0.441     | 0.268     | 0.223     | 0.128     | 0.151     | -0.05     | -0.155    | -0.029 |
| A010660_01 |    | -0.788    | -1.061    | -1.285    | -0.957    | -0.836    | -0.981    | -1.089    | -1.189 |
| A010663_01 |    | 0.093     | -0.142    | -0.099    | -0.092    | -0.324    | -0.017    | -0.07     | -0.077 |
| A010666_01 |    | -0.065    | -0.387 NA |           | -0.504    | 0.231     | 0.392     | 0.355     | 0.436  |
| A010669_01 |    | 0.726     | 0.925     | 0.313     | 0.273     | 0.086     | 0.552     | 0.989     | 0.92   |
| A010676_01 |    | -0.524    | -0.405    | -0.922    | -0.711    | -0.408    | -0.067    | -0.413    | -0.32  |
| A010677_01 |    | 0.393     | 0.415     | 0.224     | 0.366     | 0.459     | 0.366     | 0.501     | 0.63   |
| A010678_01 |    | 0.141     | 0.141     | -0.029    | -0.148    | 0.173     | 0.187     | 0.218     | 0.075  |
| A010679_01 |    | -0.612 NA |           | -0.291    | -0.358 NA |           | -0.735    | -0.531    | -0.711 |
| A010681_01 |    | 0.999     | 0.551     | -0.112    | -0.135    | 0.335     | 0.127     | 0.203     | 0.201  |
| A010689_01 |    | -0.633 NA |           | -1.166 NA | NA        | NA        |           | -0.769 NA |        |
| A010690_01 |    | 0.427     | 0.562     | -0.077    | -0.052    | 0.2       | 0.486     | 0.462     | 0.776  |
| A010693_01 |    | 0.521     | 0.541     | 0.392     | 0.165     | 0.555     | 0.564     | 0.509     | 0.354  |
| A010696_01 |    | 0.122     | 0.184     | 0.33      | 0.082     | 0.683     | 0.391     | 0.473     | 0.366  |
| A010698_01 |    | 0.389     | 0.003     | -0.526    | -0.421    | 0         | -0.405 NA |           | -0.36  |
| A010699_01 |    | 0.441     | 0.219     | -0.328    | -0.199    | -0.486    | -0.597    | -0.479    | -0.155 |
| A010701_01 |    | 1.165     | 0.644     | 0.173     | 0.371     | 0.662     | 0.956     | 0.843     | 1.177  |



|            |    |           |        |           |           |           |          |           |        |
|------------|----|-----------|--------|-----------|-----------|-----------|----------|-----------|--------|
| A010704_01 |    | 0.135     | 0.142  | 0.6       | 0.401     | 0.576     | 0.514    | 0.432     | 0.353  |
| A010706_01 | NA | NA        |        | -0.063    | -0.037 NA |           | 0.514    | 0.378     | 0.471  |
| A010708_01 | NA | NA        |        | -0.538    | -0.474 NA | NA        |          | -0.945 NA |        |
| A010709_01 |    | -0.209    | -0.476 | -0.233    | -0.226    | -0.209    | -0.417   | -0.268    | -0.284 |
| A010710_01 |    | 0.12      | -0.041 | 0.29      | -0.155    | 0.238     | -0.008   | 0.223     | -0.211 |
| A010713_01 |    | 0.135 NA  |        | 0.189     | -0.006    | 0.114 NA  |          | 0.151     | -0.056 |
| A010715_01 |    | 0.574     | 0.43   | 0.173     | 0.159     | 0.11      | 0.153    | -0.098    | -0.096 |
| A010720_01 |    | 0.425     | 0.428  | 0.123 NA  |           | 0.496     | 0.218    | 0.368     | 0.341  |
| A010724_01 |    | -0.523 NA |        | -0.137    | -0.05     | -0.31     | -0.172   | -0.241    | -0.139 |
| A010725_01 |    | 0.154     | 0.094  | 0.158     | 0.038     | -0.095    | -0.077   | 0.051     | 0.099  |
| A010727_01 |    | -0.34     | -0.326 | -0.042    | -0.183    | 0.048     | 0.028    | 0.552     | 0.288  |
| A010729_01 |    | 0.268     | 0.023  | -0.156    | -0.121    | -0.19     | -0.146   | -0.009    | 0.062  |
| A010731_01 | NA | NA        |        | -1.662    | -1.432 NA | NA        |          | -1.816    | -2.104 |
| A010732_01 |    | -0.522    | -0.559 | 0.113     | 0.046     | -0.012    | 0.103    | -0.068    | -0.039 |
| A010733_01 |    | -1.391    | -1.163 | -0.822    | -0.673    | -1.018    | -1.008   | -0.779    | -0.796 |
| A010734_01 |    | -0.376    | -0.329 | 0.432     | 0.513     | 0.123     | -0.005   | 0.117     | 0.176  |
| A010737_01 |    | 0.202     | 0.357  | 0.094     | 0.121     | 0.314     | 0.306 NA |           | 0.363  |
| A010739_01 | NA | NA        |        | -0.371    | -0.142 NA | NA        |          | -1.824    | -1.685 |
| A010744_01 |    | -0.163 NA |        | -0.269 NA |           | -0.268 NA | NA       | NA        | NA     |
| A010745_01 | NA | NA        |        | 0.055 NA  |           | 0.312 NA  | NA       | NA        | NA     |
| A010749_01 |    | -0.069    | -0.016 | -0.155    | -0.057    | 0.747     | 0.507    | 0.106     | 0.109  |
| A010750_01 |    | -0.498    | -0.466 | -1.288    | -1.196    | -0.959    | -0.966   | -0.917    | -0.693 |
| A010751_01 |    | 0.155 NA  |        | 0.048     | -0.027 NA | NA        |          | -0.479    | -0.532 |
| A010756_01 | NA | NA        |        | -0.221    | -0.04 NA  | NA        |          | -0.503    | -0.363 |
| A010758_01 |    | -0.783    | -0.745 | -0.037    | -0.048    | -0.694 NA |          | -0.438    | -0.468 |
| A010759_01 |    | 0.76      | 0.559  | -0.25 NA  | NA        |           | 0.254    | 0.267 NA  |        |
| A010772_01 |    | 0.025     | 0.074  | -0.174    | 0.172     | -0.115    | 0.128    | 0.042     | 0.158  |
| A010775_01 | NA | NA        |        | -0.169    | -0.08 NA  | NA        | NA       |           | -0.081 |
| A010776_01 |    | -0.425    | -0.219 | -0.5      | -0.387    | -0.149    | 0.022    | -0.001    | 0.02   |
| A010781_01 |    | 0.473     | 0.177  | -0.229    | -0.163    | 0.542     | 0.418    | 0.279     | 0.232  |
| A010790_01 |    | 0.491     | 0.486  | 0.459     | 0.389     | -0.457    | -0.062   | -0.319    | -0.26  |
| A010803_01 | NA | NA        |        | -0.057    | -0.127 NA | NA        | NA       | NA        | NA     |
| A010804_01 |    | 0.598     | 0.627  | -0.545    | -0.388    | -0.217    | 0.054    | -0.665    | -0.499 |
| A010805_01 |    | -0.236    | -0.042 | 0.393     | 0.273     | 0.844     | 0.747    | 0.559     | 0.42   |
| A010815_01 |    | 0.113     | 0.037  | 0.16      | 0.108     | -0.323    | -0.231   | -0.127    | -0.161 |
| A010819_01 |    | 0.628 NA  |        | -0.524 NA |           | -0.454 NA |          | -0.553 NA |        |
| A010822_01 |    | 0.315     | 0.303  | 0.711     | 0.288     | 0.632     | 0.324    | 0.473     | 0.189  |
| A010834_01 |    | -0.445    | -0.193 | -0.104    | -0.002    | -0.317 NA |          | -0.429    | -0.222 |
| A010837_01 |    | -0.217    | -0.299 | -0.208    | -0.007    | -0.705    | -0.475   | -0.416    | -0.379 |
| A010846_01 |    | 0.675     | 0.202  | -0.392    | -0.25     | -0.001    | -0.036   | 0.062     | 0.133  |
| A010851_01 |    | 0.257     | 0.229  | -0.067    | -0.067    | 0.362     | 0.236    | 0.085     | 0.044  |
| A010863_01 |    | -0.806    | -0.922 | -0.11     | 0.032     | -0.168    | -0.212   | 0.239     | 0.307  |
| A010869_01 |    | 0.304     | -0.008 | -0.026    | 0.113     | -0.478    | -0.574   | -0.412    | -0.117 |
| A010874_01 |    | -0.014    | 0.53   | 0.275     | 0.281     | 0.187     | 0.192    | 0.13      | 0.027  |
| A010875_01 | NA | NA        |        | 0.183     | 0.093     | 0.044 NA  |          | 0.361     | 0.292  |
| A010876_01 |    | -0.314    | 0.007  | -0.14     | -0.064    | 0.053 NA  |          | -0.296    | -0.208 |
| A010877_01 | NA |           | -0.142 | -0.61 NA  | NA        | NA        |          | -0.247 NA | NA     |
| A010879_01 | NA | NA        |        | -0.777 NA | NA        | NA        | NA       | NA        | NA     |
| A010881_01 |    | -1.494    | -0.919 | 0.475     | 0.485     | 0.437     | 0.284    | 0.315     | 0.348  |
| A010885_01 |    | -0.67 NA  |        | 0.439     | 0.427     | -0.055 NA |          | 0.038     | 0.03   |
| A010887_01 |    | 0.348     | 0.385  | 0.156 NA  |           | 0.445     | 0.24 NA  |           | 0.311  |
| A010892_01 |    | 0.215     | 0.062  | -0.116    | -0.063    | -0.064    | -0.14    | -0.202    | -0.086 |
| A010893_01 |    | 0.122     | 0.071  | 0.165     | 0.12      | 0.313     | 0.16     | 0.1       | 0.073  |
| A010898_01 |    | -0.575 NA |        | -1.273 NA |           | -0.58 NA  |          | -0.64 NA  |        |
| A010902_01 |    | 0.382     | 0.546  | -0.022    | -0.121    | 0.716     | 0.495    | 0.688     | 0.595  |
| A010909_01 |    | 0.119     | 0.072  | -0.264    | -0.109    | -0.093    | -0.104   | -0.383    | -0.318 |
| A010911_01 |    | -0.805    | -1.128 | -0.026    | -0.012    | -0.962    | -0.894   | -0.531    | -0.461 |
| A010912_01 | NA | NA        |        | -0.879    | -0.847    | -0.694 NA |          | -0.435    | -0.881 |
| A010915_01 |    | 0.889     | 0.366  | 0.237     | 0.373     | 0.381     | 0.416    | -0.007    | 0.022  |
| A010916_01 |    | -0.421    | -0.122 | -0.321    | -0.222    | 0.157     | 0.036    | 0.164     | 0.043  |
| A010926_01 |    | -0.023 NA |        | -0.365 NA |           | -0.292 NA | NA       | NA        | NA     |
| A010929_01 | NA | NA        |        | 0.467     | 0.549     | 0.199 NA  | NA       | NA        | NA     |
| A010934_01 |    | 0.164 NA  |        | 0.312     | 0.265     | -0.247    | -0.215   | -0.377    | -0.347 |
| A010935_01 |    | 0.818     | 0.618  | 0.151     | 0.143     | 0.393     | 0.223    | 0.418     | 0.347  |
| A010938_01 |    | 0.15      | -0.121 | -0.066    | 0.038     | -0.284    | 0.006    | 0.001     | 0.157  |
| A010941_01 |    | 0.213     | 0.078  | -0.244    | -0.135    | -0.141    | 0.173    | -0.277    | -0.004 |
| A010942_01 |    | -0.043    | 0.02   | 0.103     | -0.038    | 0.316     | 0.252    | 0.26      | 0.023  |
| A010943_01 | NA | NA        |        | -0.097    | -0.253 NA | NA        |          | -0.415    | -0.834 |

|            |    |        |        |  |        |        |    |        |        |    |        |        |
|------------|----|--------|--------|--|--------|--------|----|--------|--------|----|--------|--------|
| A010947_01 |    | 0.632  | NA     |  | 0.264  | 0.205  | NA |        | NA     |    | -0.237 | -0.205 |
| A010948_01 | NA |        | NA     |  | -0.112 | -0.269 | NA |        | NA     |    | -0.371 | -0.641 |
| A010949_01 |    | 1.095  | 0.773  |  | 0.482  | 0.389  |    | 1.282  | 0.943  |    | 0.922  | 0.974  |
| A010951_01 |    | 0.383  | 0.309  |  | 0.186  | 0.217  |    | 0.299  | 0.436  |    | 0.561  | 0.495  |
| A010955_01 |    | -0.803 | -0.311 |  | -1.192 | -0.968 |    | -0.667 | -0.302 |    | -0.258 | 0.035  |
| A010958_01 |    | 1.075  | 1.058  |  | -0.645 | -0.328 |    | 1.566  | 1.099  |    | 1.385  | 1.459  |
| A010960_01 |    | -0.262 | -0.069 |  | 0.254  | 0.277  |    | -0.249 | -0.117 |    | -0.008 | -0.153 |
| A010961_01 |    | 0.682  | 0.833  |  | -0.397 | -0.372 |    | 0.964  | 1.082  |    | 0.966  | 1.151  |
| A010963_01 |    | -0.282 | -0.06  |  | 0.156  | 0.137  |    | -0.051 | 0.118  |    | 0.038  | 0.053  |
| A010964_01 |    | 0.467  | 0.548  |  | -0.288 | -0.223 |    | 0.703  | 0.413  |    | 0.63   | 0.677  |
| A010973_01 |    | -0.553 | NA     |  | 0.048  | NA     |    | -0.199 | NA     |    | NA     | NA     |
| A010976_01 |    | 0.006  | -0.243 |  | 0.277  | 0.273  |    | 0.06   | -0.156 |    | -0.329 | -0.431 |
| A010980_01 | NA |        | NA     |  | 0.559  | 0.473  | NA |        | NA     |    | 0.005  | -0.021 |
| A010995_01 |    | 0.071  | NA     |  | 0.563  | 0.22   |    | 0.188  | NA     |    | 0.255  | NA     |
| A010996_01 |    | 0.949  | 0.715  |  | 0.02   | 0.015  |    | 0.424  | 0.249  |    | 0.107  | 0.245  |
| A011002_01 | NA |        | -0.395 |  | 0.069  | 0.179  |    | -0.546 | -0.476 |    | -0.552 | -0.367 |
| A011007_01 |    | 0.102  | 0.434  |  | -0.268 | -0.212 |    | 0.754  | 0.817  |    | 0.646  | 0.644  |
| A011019_01 |    | 0.086  | 0.048  |  | 0.222  | 0.249  |    | 0.604  | 0.515  |    | 0.544  | 0.594  |
| A011021_01 |    | -0.328 | -0.217 |  | 0.034  | 0.123  |    | 0.025  | 0.056  |    | 0.21   | 0.337  |
| A011029_01 |    | 0.999  | 0.845  |  | 0.09   | NA     |    | 0.626  | 0.768  | NA |        | 0.802  |
| A011033_01 |    | -0.05  | 0.188  |  | 0.132  | 0.195  |    | 0.418  | 0.555  |    | 0.328  | 0.424  |
| A011038_01 |    | 0.505  | 0.261  |  | 0.312  | 0.084  |    | 0.72   | 0.468  |    | 0.491  | 0.325  |
| A011039_01 |    | 0.537  | 0.391  |  | -0.332 | -0.185 |    | 0.102  | 0.162  |    | 0.061  | 0.155  |
| A011040_01 | NA |        | 0.111  |  | 0.075  | -0.078 |    | 0.319  | 0.456  |    | 0.106  | 0.092  |
| A011046_01 |    | -0.21  | -0.075 |  | -0.989 | -0.744 |    | -0.174 | -0.354 |    | -0.45  | -0.584 |
| A011048_01 | NA |        | NA     |  | -0.236 | -0.149 | NA |        | NA     |    | -0.606 | -0.568 |
| A011054_01 |    | 0.67   | 0.215  |  | -0.138 | -0.08  |    | -0.114 | -0.15  |    | -0.149 | -0.207 |
| A011055_01 | NA |        | -0.271 |  | -0.317 | -0.341 |    | -0.327 | -0.505 |    | 0.052  | -0.035 |
| A011064_01 |    | 0.232  | 0.151  |  | 0.195  | 0.143  |    | 0.257  | 0.026  |    | 0.126  | 0.062  |
| A011068_01 |    | 0.391  | 0.064  |  | -0.202 | -0.081 |    | 0.302  | 0.423  |    | 0.13   | 0.343  |
| A011077_01 |    | 0.848  | NA     |  | 0.001  | NA     |    | NA     | NA     |    | NA     | NA     |
| A011078_01 |    | -0.055 | -0.154 |  | -0.728 | -0.606 |    | -0.265 | -0.338 |    | -0.306 | -0.386 |
| A011085_01 |    | -0.605 | -0.612 |  | -0.377 | -0.247 |    | -0.715 | -0.83  |    | -0.445 | -0.678 |
| A011089_01 |    | -1.006 | -0.585 |  | -0.023 | -0.178 |    | 0.017  | 0.238  |    | 0.152  | 0.234  |
| A011090_01 | NA |        | NA     |  | 0.804  | 0.489  |    | 0.555  | NA     |    | 0.278  | 0.078  |
| A011094_01 |    | -0.474 | -0.25  |  | 0.701  | 0.485  |    | 0.937  | 0.75   |    | 0.607  | 0.438  |
| A011096_01 | NA |        | NA     |  | 0.206  | -0.14  | NA |        | NA     |    | NA     | NA     |
| A011104_01 |    | -0.004 | NA     |  | -0.78  | -0.734 |    | -0.352 | NA     |    | -0.275 | -0.424 |
| A011108_01 | NA |        | NA     |  | 0.271  | 0.111  |    | 0.33   | 0.117  |    | 0.145  | -0.082 |
| A011109_01 |    | -0.615 | 0.006  |  | 0.295  | 0.22   |    | 0.68   | 0.906  |    | 0.938  | 0.895  |
| A011114_01 |    | 0.05   | 0.366  |  | 0.157  | 0.212  |    | 0.196  | 0.418  |    | 0.36   | 0.508  |
| A011121_01 |    | -0.035 | -0.311 |  | -0.076 | 0.056  |    | -0.531 | -0.799 |    | -0.307 | -0.281 |
| A011124_01 | NA |        | NA     |  | 0.45   | 0.21   | NA |        | -0.017 |    | 0.095  | -0.135 |
| A011130_01 |    | -0.004 | 0.259  |  | 0.242  | 0.206  |    | 0.053  | 0.447  |    | 0.433  | 0.396  |
| A011132_01 |    | 0.437  | 0.159  |  | -0.254 | -0.196 |    | -0.122 | -0.354 |    | -0.188 | -0.225 |
| A011133_01 |    | -0.56  | -0.765 |  | -0.009 | -0.01  |    | -1.369 | -1.298 |    | -0.646 | -0.754 |
| A011142_01 |    | 0.542  | 0.294  |  | 0.112  | 0.159  |    | 0.141  | 0.06   |    | 0.088  | -0.105 |
| A011146_01 |    | 0.731  | 0.814  |  | -1.248 | -1.11  |    | 1.449  | 1.792  |    | 1.834  | 2.097  |
| A011148_01 | NA |        | -0.405 |  | -0.6   | -0.41  | NA |        | -0.524 |    | -0.501 | NA     |
| A011153_01 |    | 0.06   | -0.17  |  | -0.557 | -0.613 |    | 0.041  | -0.126 |    | 0.315  | 0.163  |
| A011159_01 |    | 0.544  | 0.307  |  | -0.277 | -0.222 |    | -0.293 | -0.358 |    | -0.09  | -0.107 |
| A011163_01 | NA |        | NA     |  | 0.16   | 0.026  | NA |        | NA     |    | -0.127 | -0.278 |
| A011164_01 | NA |        | NA     |  | 0.378  | 0.082  | NA |        | NA     |    | 0.183  | -0.211 |
| A011167_01 | NA |        | -0.531 |  | -0.045 | 0.081  | NA |        | 0.114  |    | -0.162 | -0.128 |
| A011171_01 |    | 0.856  | 0.4    |  | -0.205 | -0.109 |    | 0.032  | -0.056 |    | 0.098  | 0.167  |
| A011187_01 | NA |        | NA     |  | 0.225  | 0.063  | NA |        | NA     |    | 0.048  | NA     |
| A011189_01 | NA |        | NA     |  | 0.442  | 0.235  | NA |        | 0.08   |    | 0.038  | -0.218 |
| A011190_01 | NA |        | -1.114 |  | -0.739 | -0.55  | NA |        | -0.84  |    | -1.118 | -1.032 |
| A011193_01 |    | -0.413 | -0.599 |  | -1.395 | -0.979 |    | -1.057 | -1.009 |    | -1.665 | -1.796 |
| A011194_01 | NA |        | -0.526 |  | -0.067 | -0.173 |    | -0.416 | -0.322 |    | -0.263 | -0.546 |
| A011198_01 |    | -1.167 | -1.642 |  | -0.536 | -0.478 |    | 1.556  | 1.489  |    | 1.361  | 1.142  |
| A011199_01 |    | -0.117 | 0      |  | -0.749 | -0.646 |    | 0.449  | 0.316  |    | 0.226  | 0.254  |
| A011200_01 |    | 0.232  | 0.094  |  | 0.061  | 0.038  |    | 0.403  | 0.438  |    | -0.136 | -0.07  |
| A011203_01 |    | 0.732  | NA     |  | 0.019  | -0.001 |    | 0.715  | 0.433  |    | 0.451  | 0.547  |
| A011208_01 |    | 0.626  | 0.484  |  | -0.29  | NA     |    | NA     | NA     |    | NA     | NA     |
| A011223_01 |    | 0.332  | -0.109 |  | -0.23  | -0.27  |    | 0.044  | -0.223 |    | -0.074 | -0.041 |
| A011226_01 | NA |        | NA     |  | -0.264 | NA     |    | NA     | NA     |    | NA     | NA     |
| A011227_01 |    | 1.118  | 0.706  |  | -1.387 | -1.283 |    | 0.224  | 0.304  |    | -1.218 | -1.285 |

|            |    |        |        |        |        |        |        |        |        |
|------------|----|--------|--------|--------|--------|--------|--------|--------|--------|
| A011228_01 |    | 0.903  | 0.479  | -0.073 | -0.152 | 0.178  | 0.018  | 0.116  | 0.121  |
| A011231_01 |    | -0.274 | -0.089 | 0.32   | 0.229  | 0.324  | 0.207  | 0.117  | 0.062  |
| A011242_01 |    | 0.449  | 0.37   | 0.064  | 0.067  | 0.514  | 0.395  | 0.233  | 0.254  |
| A011250_01 |    | -2.03  | -0.986 | -0.015 | -0.164 | -0.268 | 0.047  | 0.122  | -0.191 |
| A011263_01 |    | -0.356 | -0.171 | 0.122  | -0.032 | -0.037 | 0.075  | 0.014  | -0.147 |
| A011267_01 |    | -0.263 | -0.49  | -0.701 | -0.44  | -0.667 | -0.886 | -0.596 | -0.527 |
| A011270_01 | NA | NA     |        | 0.273  | 0.224  | NA     | NA     | -0.146 | -0.209 |
| A011274_01 |    | 0.089  | -0.282 | -0.351 | -0.325 | -0.515 | -0.577 | -0.546 | NA     |
| A011285_01 |    | 0.833  | 0.851  | 0.071  | -0.06  | 0.982  | 0.836  | 0.661  | 0.648  |
| A011288_01 | NA | NA     |        | -0.911 | NA     | NA     | NA     | -0.636 | NA     |
| A011296_01 | NA | NA     |        | 0.398  | 0.23   | -0.354 | NA     | -0.217 | -0.193 |
| A011301_01 |    | 0.421  | 0.512  | -0.036 | 0.138  | 0.198  | 0.445  | 0.183  | 0.216  |
| A011304_01 |    | -0.338 | -0.197 | -0.39  | -0.163 | -0.568 | -0.213 | -0.3   | -0.173 |
| A011306_01 | NA | NA     |        | -0.121 | NA     | NA     | NA     | 0.178  | NA     |
| A011307_01 |    | 0.238  | 0.018  | -0.514 | -0.346 | 0.194  | 0.308  | 0.26   | 0.678  |
| A011311_01 |    | -0.134 | 0.133  | 0.25   | 0.274  | 0.448  | 0.215  | 0.366  | 0.296  |
| A011320_01 |    | -1.589 | NA     | NA     | NA     | NA     | -1.947 | -1.945 | NA     |
| A011322_01 |    | -0.763 | 0.272  | 0.265  | 0.113  | 0.39   | NA     | 0.21   | 0.21   |
| A011323_01 |    | 0.459  | 0.505  | -0.558 | -0.34  | 0.487  | 0.237  | 0.632  | 0.685  |
| A011326_01 |    | 0.35   | -0.14  | 0.13   | 0.244  | -0.1   | -0.075 | -0.323 | -0.101 |
| A011331_01 |    | 0.574  | 0.382  | 0.181  | 0.341  | 0.968  | 0.566  | 0.558  | 0.734  |
| A011336_01 |    | 0.071  | 0.166  | -0.026 | -0.028 | 0.166  | -0.004 | 0.084  | 0.115  |
| A011338_01 |    | 0.345  | 0.484  | 0.157  | 0.23   | 0.125  | 0.147  | NA     | 0.209  |
| A011339_01 |    | 0.585  | 0.51   | 0.052  | 0.146  | 0.255  | 0.368  | 0.078  | 0.389  |
| A011341_01 |    | 0.542  | 0.513  | 0.051  | NA     | 0.167  | 0.02   | 0.208  | 0.285  |
| A011342_01 | NA | NA     |        | -0.289 | -0.083 | -0.818 | NA     | -0.668 | -0.662 |
| A011343_01 |    | -0.778 | -1.1   | -0.259 | -0.169 | -1.16  | -1.052 | -0.135 | -0.206 |
| A011344_01 |    | -0.316 | -0.354 | -0.998 | -0.79  | -1.511 | -1.229 | -1.167 | -1.068 |
| A011349_01 | NA | NA     |        | 0.042  | NA     | NA     | NA     | -0.188 | NA     |
| A011356_01 | NA | NA     |        | 0.29   | 0.107  | NA     | NA     | NA     | -0.064 |
| A011359_01 |    | 0.322  | 0.715  | 0.489  | 0.571  | 1.297  | 1.789  | 1.159  | 1.463  |
| A011361_01 |    | -0.348 | -0.141 | -0.588 | -0.455 | -0.293 | -0.177 | 0.294  | 0.51   |
| A011372_01 | NA | NA     |        | -0.359 | NA     | NA     | NA     | NA     | NA     |
| A011374_01 |    | 0.289  | 0.388  | 0.16   | -0.039 | 0.111  | 0.143  | 0.334  | 0.073  |
| A011382_01 |    | -0.295 | -0.026 | -0.139 | -0.09  | 0.101  | 0.128  | -0.012 | 0.02   |
| A011384_01 |    | 0.222  | -0.017 | -0.06  | -0.032 | 0.097  | -0.161 | 0.145  | 0.029  |
| A011385_01 |    | 0.126  | -0.229 | 0.23   | 0.04   | -0.063 | -0.392 | -0.194 | -0.301 |
| A011387_01 | NA | NA     |        | 0.255  | -0.029 | 0.048  | NA     | 0.236  | 0.154  |
| A011390_01 |    | -0.153 | NA     | NA     | NA     | -0.112 | -0.41  | 0.122  | NA     |
| A011395_01 |    | -0.322 | NA     | 0.29   | 0.138  | 0.135  | 0.171  | 0.083  | 0.163  |
| A011396_01 |    | -0.869 | -0.687 | -0.287 | -0.111 | -0.952 | -0.992 | -0.781 | -0.675 |
| A011397_01 |    | 0.269  | 0.056  | -0.115 | -0.113 | 0.143  | 0.34   | 0.107  | 0.223  |
| A011407_01 |    | -0.192 | -0.001 | 0.416  | 0.398  | 0.528  | 0.927  | 0.767  | 1.058  |
| A011414_01 | NA | NA     |        | 0.33   | 0.327  | NA     | -0.065 | -0.103 | -0.227 |
| A011416_01 |    | -0.723 | -0.514 | 0.171  | 0.14   | 0.262  | 0.183  | -0.034 | -0.034 |
| A011419_01 |    | 0.716  | 0.173  | -0.459 | -0.273 | -0.142 | -0.368 | -0.783 | -0.367 |
| A011422_01 |    | -0.029 | 0      | 0.336  | 0.062  | 0.231  | 0.012  | 0.177  | -0.169 |
| A011426_01 | NA | NA     |        | 0.577  | 0.457  | NA     | NA     | 0.04   | 0.012  |
| A011428_01 | NA | NA     |        | 0.293  | 0.354  | NA     | NA     | NA     | 0.214  |
| A011429_01 |    | -0.492 | 0.034  | 0.009  | 0.089  | 0.291  | 0.583  | 0.511  | 0.657  |
| A011435_01 | NA | NA     |        | 0.415  | 0.361  | NA     | NA     | -0.01  | 0.043  |
| A011436_01 |    | 1.224  | 1.031  | -0.023 | -0.001 | 0.409  | 0.318  | 0.196  | NA     |
| A011441_01 |    | 0.877  | 0.581  | 0.068  | 0.173  | 0.696  | 0.664  | 0.441  | 0.619  |
| A011445_01 |    | -0.594 | -0.264 | 0.081  | 0.083  | 0.276  | 0.353  | 0.029  | 0.281  |
| A011446_01 |    | 0.215  | 0.189  | -0.635 | NA     | -0.15  | -0.113 | 0.12   | 0.233  |
| A011452_01 |    | -0.014 | -0.154 | -0.042 | -0.035 | -0.107 | -0.192 | NA     | -0.017 |
| A011455_01 |    | 0.207  | 0.232  | 0.219  | 0.155  | 0.219  | 0.154  | 0.196  | 0.246  |
| A011460_01 | NA | NA     |        | -0.264 | 0.022  | 0.065  | NA     | -0.135 | -0.035 |
| A011461_01 | NA | NA     |        | -0.115 | 0.072  | NA     | NA     | -0.233 | 0.075  |
| A011462_01 | NA | NA     |        | 0.035  | -0.128 | NA     | NA     | NA     | NA     |
| A011471_01 |    | -0.477 | NA     | 0.348  | 0.384  | 0.058  | NA     | NA     | NA     |
| A011472_01 |    | 0.455  | 0.261  | 0.041  | -0.043 | -0.104 | -0.163 | -0.169 | -0.221 |
| A011474_01 |    | -0.294 | -0.121 | -0.367 | -0.203 | -0.279 | -0.31  | -0.307 | -0.158 |
| A011478_01 | NA | NA     |        | 0.626  | 0.372  | 0.309  | 0.338  | 0.091  | 0.097  |
| A011479_01 |    | -0.043 | -0.491 | -0.374 | -0.281 | -0.563 | -0.789 | -0.598 | -0.832 |
| A011480_01 |    | 0.016  | -0.398 | 0.095  | -0.002 | -0.271 | -0.416 | -0.228 | -0.232 |
| A011486_01 |    | 0.124  | -0.068 | -0.288 | -0.268 | -0.372 | -0.278 | -0.425 | -0.34  |
| A011487_01 | NA | NA     |        | 0.443  | 0.138  | 0.108  | NA     | -0.251 | -0.291 |

|            |    |           |           |           |           |           |           |          |        |
|------------|----|-----------|-----------|-----------|-----------|-----------|-----------|----------|--------|
| A011489_01 |    | 0.523     | -0.13 NA  | NA        |           | -0.594    | -0.883 NA | NA       |        |
| A011491_01 | NA |           | -0.433    | -0.236 NA |           | -0.456 NA | NA        | NA       |        |
| A011505_01 |    | -0.449    | -0.023    | -0.356    | -0.062    | -0.49 NA  | NA        |          | -0.399 |
| A011508_01 |    | -0.308    | -0.233    | -0.164    | -0.118    | -0.232    | -0.06     | 0.064    | -0.059 |
| A011510_01 |    | -0.469    | -0.013    | 0.157     | 0.017     | 0.205     | 0.13      | -0.046   | -0.027 |
| A011511_01 |    | 0.072     | 0.01      | -0.244    | -0.181    | 0.187     | -0.079    | -0.023   | -0.088 |
| A011512_01 |    | 0.558     | 0.447     | -0.096 NA |           | 0.459     | 0.333     | 0.674    | 0.754  |
| A011521_01 |    | -0.099    | -0.31     | 0.188     | 0.093     | -0.395    | -0.287    | 0.079    | -0.102 |
| A011522_01 |    | -0.695    | -0.606    | 0.155     | -0.03     | -0.239    | -0.266    | -0.229   | -0.305 |
| A011523_01 |    | 0.277     | -0.119 NA | NA        |           | -0.842    | -1.053 NA | NA       |        |
| A011526_01 |    | -0.378    | -0.2      | 0.301     | 0.387     | 0.211     | 0.037     | -0.061   | 0.011  |
| A011532_01 |    | 0.386     | 0.594     | 0.777     | 0.832     | 0.425     | 0.699     | 0.411    | 0.56   |
| A011533_01 | NA | NA        |           | 0.363     | 0.473 NA  | NA        |           | -0.424   | -0.413 |
| A011535_01 |    | 0.19      | 0.202     | 0.232     | 0.137     | 0.309     | 0.268     | 0.106    | 0.043  |
| A011536_01 | NA |           | -0.147    | -0.075 NA |           | -0.351 NA | NA        | NA       |        |
| A011539_01 |    | 0.203     | 0.095     | -0.116    | -0.113    | 0.342     | -0.096    | 0.019    | 0.056  |
| A011540_01 |    | 0.036     | 0.16      | -0.254    | -0.117    | -0.13     | 0.03      | -0.223   | 0.096  |
| A011541_01 | NA | NA        |           | -0.552    | -0.593 NA | NA        |           | -0.741   | -0.679 |
| A011544_01 |    | -0.175    | -0.005    | -0.013    | -0.107    | 0.119     | 0.151     | 0.237    | 0.166  |
| A011546_01 | NA | NA        |           | 0.212     | -0.045 NA |           | -0.023    | 0.214    | -0.176 |
| A011548_01 |    | -2.835 NA | NA        | NA        |           | -2.749 NA | NA        | NA       |        |
| A011550_01 |    | 1.252     | 0.997     | -0.048    | -0.069    | 0.569     | 0.418     | 0.583    | 0.664  |
| A011557_01 | NA | NA        |           | -0.109    | -0.005 NA |           | -0.699    | -0.564   | -0.507 |
| A011566_01 |    | -0.586    | -0.041    | 0.044     | -0.022    | -0.035    | 0.237     | 0.226    | 0.156  |
| A011569_01 |    | -0.995    | -0.681    | -0.814    | -0.739    | -0.845    | -0.844    | -0.697   | -0.951 |
| A011571_01 |    | 0.335 NA  |           | -0.213 NA | NA        | NA        | NA        | NA       |        |
| A011574_01 |    | -0.526    | -0.175    | -0.182    | -0.207    | 0.491     | 0.263     | 0.385    | 0.23   |
| A011575_01 |    | 0.444     | 0.182     | 0.162     | 0.061     | 0.277     | 0.115     | 0.105    | 0.043  |
| A011576_01 |    | 0.377     | 0.244     | -0.037    | -0.139    | 0.397     | 0.234     | 0.209    | -0.152 |
| A011584_01 |    | -0.642    | -0.118    | 0.328     | 0.291     | -0.05     | 0.103     | 0.15     | 0.09   |
| A011585_01 |    | -1.081    | -1.064    | 0.088     | 0.03      | -0.12     | -0.089    | 0.052    | 0.008  |
| A011589_01 |    | 0.226     | 0.061     | 0.159     | 0.042     | 0.292     | 0.172     | 0.389    | 0.211  |
| A011592_01 | NA | NA        |           | 0.489     | 0.374 NA  |           | 0.023     | 0.277    | 0.048  |
| A011593_01 | NA | NA        |           | 0.004     | -0.085    | -0.13     | -0.01     | 0.392    | 0.612  |
| A011600_01 |    | 0.304     | 0.191     | -0.186    | -0.068    | 0.007     | 0.292     | 0.097    | 0.328  |
| A011601_01 | NA | NA        |           | -2.232    | -1.766 NA | NA        | NA        | NA       |        |
| A011604_01 |    | -0.25     | -0.095    | 0.167     | 0.102     | -0.008    | -0.126    | -0.292   | -0.35  |
| A011606_01 |    | -0.255    | -0.452    | -0.475    | -0.501    | 0.053     | -0.155    | 0.175    | 0.267  |
| A011607_01 |    | -0.375    | -0.617    | -0.351    | -0.321    | 0.353     | 0.408     | 0.579    | 0.462  |
| A011610_01 |    | 0.41      | 0.286     | -0.467    | -0.333    | 0.033     | 0.201     | 0.007    | 0.045  |
| A011611_01 |    | 0.595     | 0.184     | -0.033    | -0.111 NA |           | -0.287    | -0.06    | -0.093 |
| A011613_01 | NA | NA        |           | 0.12      | -0.073    | -0.319 NA |           | -0.042   | -0.011 |
| A011614_01 |    | -1.243    | -1.702    | -2.019    | -1.622    | -2.465    | -2.241    | -1.964   | -1.6   |
| A011619_01 | NA | NA        |           | 0.425     | 0.362     | -0.483 NA | NA        |          | -0.038 |
| A011622_01 |    | -0.301    | 0.168     | 0.027     | 0.097     | 0.514     | 0.724     | 0.949    | 0.985  |
| A011624_01 | NA | NA        |           | -0.048    | 0.001     | 0.364 NA  |           | 0.258    | 0.271  |
| A011625_01 |    | 0.351     | 0.17      | 0.223     | 0.375     | -0.062 NA | NA        |          | -0.018 |
| A011629_01 |    | -0.388    | -0.263    | -0.104    | -0.186    | -0.302    | 0.04      | 0.156    | 0.183  |
| A011630_01 |    | -0.1      | 0.085     | -0.158 NA |           | 0.271     | 0.192     | 0.263    | 0.267  |
| A011631_01 |    | -0.592    | -0.046    | 0.552     | 0.482     | 0.029     | 0.237     | -0.085   | -0.183 |
| A011634_01 |    | -0.265    | -0.437    | 0.275     | 0.193     | -0.53     | -0.604    | -0.282   | -0.522 |
| A011637_01 | NA | NA        |           | 0.379     | 0.293 NA  | NA        |           | 0.079 NA |        |
| A011650_01 |    | -0.957    | -1.006    | -0.447    | -0.445    | -0.883    | -0.535    | -0.309   | -0.468 |
| A011652_01 |    | -0.236    | -0.205    | -0.375    | -0.199    | 0.304     | 0.421     | 0.508    | 0.708  |
| A011653_01 |    | 0.102     | 0.062     | -0.013    | 0.043     | -0.046    | -0.058    | 0.102    | 0.01   |
| A011654_01 |    | -0.233    | -0.103    | -0.193    | -0.196    | 0.148     | -0.033    | -0.035   | -0.077 |
| A011655_01 |    | 0.033     | 0.089     | 0.102     | 0.215     | 0.225     | 0.066     | 0.292    | 0.136  |
| A011658_01 |    | -0.274    | -0.068    | 0.238     | 0.295     | 0.628     | 0.865     | 0.836    | 1.065  |
| A011661_01 |    | 0.276     | 0.288     | 0.229     | 0.097     | -0.106    | -0.09     | -0.081   | -0.206 |
| A011662_01 |    | -0.268    | -0.689    | -0.401    | -0.309    | -0.794    | -0.956    | -0.633   | -0.474 |
| A011663_01 |    | 0.219     | 0.243     | -0.769    | -0.455    | 0.297     | 0.282     | 0.36     | 0.512  |
| A011665_01 |    | -1.151    | -0.695    | -0.123    | -0.021    | 0.147     | 0.273     | 0.732    | 0.801  |
| A011666_01 |    | -0.155    | -0.493    | 0.08      | 0.007     | -0.5      | -0.569    | -0.205   | -0.244 |
| A011671_01 |    | -0.591    | -0.319    | -0.987    | -0.623    | -0.596    | -0.225    | -0.472   | 0.122  |
| A011672_01 | NA | NA        |           | 0.182     | 0.055 NA  | NA        |           | 0.447    | 0.411  |
| A011673_01 |    | -1.11     | -0.762    | -2.032    | -1.627    | -0.474    | -0.694    | -0.737   | -0.801 |
| A011674_01 |    | -0.563    | -0.425    | -0.054    | 0.162     | -0.648    | -0.621    | -0.223   | -0.144 |
| A011675_01 |    | -0.11 NA  |           | -0.212    | -0.214    | -0.155 NA |           | -0.102   | 0.004  |

|            |    |           |        |           |           |           |        |          |        |
|------------|----|-----------|--------|-----------|-----------|-----------|--------|----------|--------|
| A011677_01 |    | 0.137     | 0.285  | 0.325     | 0.198     | 0.176     | 0.119  | -0.012   | -0.168 |
| A011678_01 |    | 0.184     | -0.184 | -0.175 NA |           | -0.109 NA | NA     | NA       |        |
| A011687_01 |    | -0.379    | -0.077 | 0.218     | 0.114     | -0.118    | -0.024 | 0.07     | 0.04   |
| A011689_01 |    | -0.2      | -0.568 | -0.902    | -0.737    | -0.564    | -0.745 | -1.021   | -0.966 |
| A011691_01 | NA | NA        |        | 0.396     | 0.331     | 0.088 NA  |        | 0.196    | 0.019  |
| A011692_01 |    | -0.352    | 0.182  | 0.138     | 0.23      | -0.205    | 0.286  | 0.004    | 0.085  |
| A011693_01 | NA | NA        |        | 0.074     | 0.054 NA  | NA        |        | 0.101 NA |        |
| A011694_01 |    | -1.036    | -0.159 | -0.186    | -0.048    | -0.102    | 0.304  | 0.261    | 0.426  |
| A011695_01 |    | -1.009    | -0.625 | 0.316     | 0.436     | -0.169 NA |        | -0.264   | -0.007 |
| A011696_01 | NA | NA        |        | -0.244    | -0.267 NA | NA        |        | 0.477    | 0.675  |
| A011700_01 |    | 0.821     | 0.299  | -0.098    | -0.026    | 0.121     | 0.426  | -0.007   | 0.329  |
| A011703_01 | NA | NA        |        | -0.324 NA |           | 0.294 NA  |        | 0.428 NA |        |
| A011712_01 | NA | NA        |        | 0.206     | 0.215 NA  | NA        |        | -0.168   | -0.286 |
| A011713_01 | NA | NA        |        | 0.104     | -0.1 NA   | NA        |        | -0.492   | -0.802 |
| A011716_01 |    | -0.29     | -0.002 | 0.261     | 0.234     | 0.366     | 0.2    | 0.093    | 0.027  |
| A011717_01 |    | -0.981    | -0.542 | -0.342    | -0.085    | -0.862    | -0.488 | -0.315   | -0.228 |
| A011718_01 | NA | NA        |        | -0.558    | -0.191    | 0.235 NA  | NA     |          | 0.325  |
| A011719_01 | NA | NA        |        | 0.259     | 0.432 NA  | NA        |        | -0.273   | 0.036  |
| A011720_01 |    | 0.618     | 0.558  | -0.47     | -0.216    | -0.077    | -0.032 | 0.143    | 0.361  |
| A011722_01 |    | -0.888    | -0.915 | -0.665    | -0.524    | -0.906    | -0.734 | -0.729   | -0.631 |
| A011724_01 |    | 0.457     | 0.281  | -0.401    | -0.251    | -0.414    | -0.231 | -0.051   | 0.35   |
| A011725_01 | NA | NA        |        | 0.007     | 0.083 NA  | NA        |        | -0.19    | -0.197 |
| A011726_01 |    | 0.731     | 0.864  | 0.291     | 0.423     | 0.561     | 1.017  | 1.039    | 1.188  |
| A011728_01 |    | 0.331     | 0.289  | -0.257    | -0.209    | 0.329     | 0.165  | 0.209    | -0.11  |
| A011732_01 |    | -0.045    | 0.273  | -0.376    | -0.28     | 0.21      | 0.29   | -0.116   | 0.168  |
| A011740_01 | NA | NA        |        | -0.954    | -0.72 NA  | NA        |        | -0.736   | -0.629 |
| A011743_01 | NA |           | -0.26  | 0.559     | 0.493     | 0.211     | 0.322  | 0.208    | 0.299  |
| A011749_01 |    | 0.581 NA  |        | -0.42 NA  | NA        | NA        | NA     | NA       |        |
| A011750_01 |    | 0.176     | 0.075  | 0.231     | 0.24      | 0.423     | 0.44   | 0.11     | 0.213  |
| A011752_01 |    | -0.061    | -0.096 | -0.109    | -0.089    | 0.169     | 0.213  | 0.087    | 0.167  |
| A011755_01 |    | -0.445    | 0.396  | -0.369    | 0.089     | -0.592    | 0.757  | -0.167   | 0.598  |
| A011757_01 |    | -0.731    | -0.233 | -0.213    | -0.03     | -0.849    | -0.255 | 0.042    | 0.118  |
| A011758_01 |    | 0.56      | 0.532  | 0.391     | 0.282     | 0.429     | 0.332  | 0.5      | 0.374  |
| A011760_01 |    | -0.355    | -0.278 | -0.435    | -0.195    | -0.714    | -0.511 | -0.438   | -0.255 |
| A011761_01 | NA | NA        |        | -0.387    | -0.278    | -0.404 NA |        | -0.349   | -0.313 |
| A011762_01 |    | -0.323    | -0.273 | -0.224    | -0.321    | -0.058    | -0.029 | 0.205    | 0.218  |
| A011763_01 |    | -0.591    | -0.106 | -0.038    | 0.178     | -0.473    | 0.067  | -0.104   | 0.099  |
| A011764_01 |    | -0.921    | -0.437 | -0.552    | -0.37     | 0.269     | 0.126  | -0.16    | -0.073 |
| A011766_01 |    | -0.841 NA |        | -0.951    | -0.647    | -0.956    | -0.806 | -0.513   | -0.529 |
| A011767_01 |    | 0.275     | 0.31   | 0.328     | 0.248     | 0.462     | 0.474  | 0.275    | 0.258  |
| A011769_01 |    | 0.551     | 0.5    | 0.012     | -0.066    | 0.15      | 0.093  | 0.531    | 0.402  |
| A011770_01 |    | 0.063     | -0.118 | 0.473     | 0.233     | 0.548     | 0.468  | 0.233    | 0.108  |
| A011772_01 |    | -0.717    | -0.675 | -0.879    | -0.738    | -0.223    | -0.601 | -0.405   | -0.609 |
| A011773_01 | NA | NA        |        | 0.082     | 0.091 NA  | NA        |        | 0.098    | 0.323  |
| A011774_01 |    | -0.404    | -0.152 | -0.244    | -0.151    | 0.14      | 0.064  | 0.443    | 0.304  |
| A011775_01 |    | -0.209    | 0.107  | -0.15     | -0.052    | 0.002     | 0.453  | 0.34     | 0.314  |
| A011777_01 |    | 0.239     | 0.406  | -0.198    | -0.171    | -0.42     | -0.1   | -0.605   | -0.514 |
| A011778_01 |    | 0.218     | 0.108  | -0.184    | -0.221    | 0.035     | -0.069 | 0.091    | 0.319  |
| A011779_01 |    | 0.616     | 0.382  | -0.311    | -0.293    | 0.382     | -0.021 | -0.011   | -0.158 |
| A011780_01 |    | 0.336     | -0.002 | 0.043     | -0.076    | 0.251     | 0.136  | 0.245    | 0.058  |
| A011781_01 |    | 1.088     | 0.898  | -0.102    | -0.142    | 0.824     | 0.565  | 0.595    | 0.446  |
| A011782_01 | NA | NA        |        | -0.576 NA |           | -0.407 NA |        | 0.217    | 0.027  |
| A011784_01 |    | -0.576    | -0.451 | -0.24     | -0.216    | -0.83     | -0.773 | -0.387   | -0.532 |
| A011788_01 |    | 1.088     | 0.839  | 0.349     | 0.249     | 0.676     | 0.49   | 0.255    | 0.253  |
| A011793_01 |    | 0.1       | 0.349  | -0.25     | 0.042     | -0.559    | -0.285 | -0.293   | -0.004 |
| A011795_01 |    | -1.63     | -1.317 | 0.44      | 0.351     | -1.784    | -1.45  | -0.883   | -1.208 |
| A011797_01 |    | 0.234 NA  |        | -0.617 NA |           | -0.439 NA | NA     | NA       |        |
| A011798_01 |    | 0.137     | 0.105  | -0.205    | -0.186    | 0.303     | 0.242  | 0.371    | 0.436  |
| A011800_01 |    | -0.296    | 0.045  | 0.445     | -0.022    | -0.677    | 0.052  | 0.371    | 0.039  |
| A011802_01 |    | 0.273     | 0.271  | 0.104     | 0.123     | 0.05      | 0.087  | 0.157    | 0.107  |
| A011806_01 |    | 0.035     | -0.009 | 0.002     | -0.024    | 0.145     | 0.041  | 0.227    | 0.166  |
| A011807_01 |    | -0.077    | 0.565  | -0.177    | -0.043    | -0.559    | -0.07  | -0.203   | -0.074 |
| A011808_01 | NA | NA        |        | -0.988    | -0.919 NA | NA        | NA     | NA       |        |
| A011810_01 |    | -0.376    | -0.505 | 0.007     | 0.053     | -0.968    | -0.706 | -1.406   | -1.516 |
| A011811_01 |    | 0.973     | 0.83   | -0.752    | -0.642    | 1.803     | 1.626  | 1.725    | 1.84   |
| A011812_01 |    | -0.005    | 0.124  | -0.066    | -0.022    | 0.001     | 0.009  | 0.032    | -0.016 |
| A011813_01 |    | 0.031     | -0.075 | -0.144    | 0.005     | -0.039    | 0.189  | 0.009    | 0.243  |
| A011814_01 | NA |           | -1.615 | -0.365    | -0.353    | -0.821    | -0.803 | -0.577   | -0.581 |

|            |    |        |        |        |        |        |        |        |        |
|------------|----|--------|--------|--------|--------|--------|--------|--------|--------|
| A011816_01 | NA | NA     | 0.3    | 0.198  | NA     | NA     |        | -0.043 | -0.17  |
| A011817_01 |    | -0.247 | -0.255 | 0.586  | 0.478  | -0.161 | -0.09  | -0.137 | -0.298 |
| A011819_01 |    | 0.167  | 0.444  | -0.193 | -0.034 | 0.274  | 0.593  | 0.549  | 0.642  |
| A011820_01 |    | -0.556 | 0.297  | 0.645  | 0.41   | 0.473  | 0.258  | 0.78   | 0.697  |
| A011822_01 |    | -1.602 | -1.366 | -0.098 | -0.013 | -1.075 | -0.937 | -0.509 | -0.529 |
| A011825_01 | NA | NA     | 0.258  | 0.094  | NA     | NA     |        | 0.215  | 0.01   |
| A011826_01 |    | -0.554 | -0.405 | 0.224  | 0.217  | -0.211 | -0.235 | -0.063 | -0.077 |
| A011830_01 |    | 0.48   | 0.084  | 0.223  | 0.217  | -0.424 | -0.678 | -0.314 | -0.25  |
| A011831_01 |    | -0.198 | -0.081 | -0.003 | 0.014  | 0.439  | 0.501  | 0.274  | 0.359  |
| A011838_01 | NA |        | -0.069 | -0.173 | NA     | 0.26   | NA     | NA     | NA     |
| A011842_01 | NA |        | -0.74  | -0.275 | -0.334 | 0.064  | 0.032  | -0.02  | -0.214 |
| A011843_01 |    | -0.65  | -0.234 | -0.069 | -0.055 | -0.604 | -0.127 | -0.213 | -0.137 |
| A011844_01 |    | -0.249 | -0.221 | -0.111 | -0.071 | -0.081 | -0.109 | -0.439 | -0.277 |
| A011852_01 |    | 0.008  | 0.074  | -0.182 | -0.084 | 0.007  | -0.02  | 0.036  | 0.071  |
| A011853_01 |    | 0.35   | 0.117  | -0.397 | -0.262 | -0.199 | -0.107 | -0.191 | -0.251 |
| A011854_01 |    | -0.444 | 0.034  | 0.151  | 0.13   | 0.382  | 0.384  | -0.093 | -0.189 |
| A011855_01 |    | 0.105  | -0.056 | -0.111 | -0.145 | -0.157 | -0.086 | -0.077 | 0.013  |
| A011856_01 | NA | NA     | 0.016  | 0.019  | NA     | NA     | NA     |        | 0.296  |
| A011858_01 |    | -0.177 | -0.562 | -0.739 | -0.657 | -0.678 | -0.897 | -0.35  | -0.525 |
| A011859_01 |    | -0.025 | -0.163 | -0.131 | 0.013  | 0.002  | -0.096 | 0.064  | 0.148  |
| A011861_01 |    | -0.45  | -1.194 | -1.443 | -1.297 | -1.417 | -1.478 | -0.867 | -1.05  |
| A011862_01 | NA |        | 0.365  | 0.156  | 0.099  | NA     | 0.516  | 0.402  | 0.293  |
| A011864_01 | NA | NA     | -0.237 | -0.367 |        | 0.55   | NA     | 0.338  | 0.009  |
| A011865_01 |    | 0.413  | 0.105  | -0.265 | NA     | 0.208  | -0.257 | 0.241  | NA     |
| A011866_01 |    | -0.197 | 0.008  | -0.185 | -0.04  | 0.021  | 0.153  | 0.322  | 0.399  |
| A011870_01 |    | -1.076 | NA     | -0.623 | -0.656 | 0.106  | 0.071  | 0.56   | 0.715  |
| A011872_01 | NA | NA     | 0.02   | -0.042 | NA     | NA     |        | -0.187 | -0.221 |
| A011874_01 |    | 0.41   | 0.148  | 0.221  | -0.052 | 0.541  | 0.183  | 0.381  | -0.045 |
| A011875_01 |    | 0.28   | 0.5    | 0.296  | 0.254  | 0.407  | 0.458  | 0.591  | 0.724  |
| A011877_01 |    | -0.462 | -0.079 | 0.214  | 0.105  | 0.377  | 0.098  | 0.218  | -0.061 |
| A011881_01 |    | 0.337  | 0.29   | 0.018  | 0.067  | 0.495  | 0.329  | 0.398  | 0.415  |
| A011885_01 |    | 0.542  | 0.208  | -0.381 | -0.196 | -0.154 | -0.4   | 0.284  | 0.2    |
| A011887_01 |    | 1.071  | 0.59   | 0.449  | 0.405  | 0.482  | 0.586  | 0.319  | 0.248  |
| A011888_01 |    | 0.15   | 0.019  | -0.314 | -0.129 | -0.231 | -0.366 | -0.238 | -0.149 |
| A011889_01 |    | 0.329  | 0.614  | 0.16   | 0.335  | 0.936  | 0.771  | 0.344  | 0.573  |
| A011890_01 |    | -0.36  | -0.135 | -0.349 | -0.133 | -0.297 | -0.125 | -0.404 | -0.356 |
| A011895_01 |    | -0.406 | NA     | -0.309 | -0.213 | 0.098  | 0.087  | 0.089  | 0.129  |
| A011896_01 |    | 0.541  | 0.698  | 0.068  | 0.312  | 0.778  | 1.012  | 0.781  | 1.355  |
| A011901_01 |    | 0.556  | 0.509  | 0.18   | NA     | 0.25   | 0.089  | NA     | -0.044 |
| A011903_01 |    | 0.039  | -0.203 | 0.018  | -0.204 | -0.011 | -0.213 | -0.101 | -0.379 |
| A011910_01 |    | 0.142  | 0.001  | -0.256 | -0.186 | -0.204 | -0.354 | -0.32  | -0.258 |
| A011912_01 |    | -1.259 | -0.702 | 0.609  | 0.783  | -0.225 | 0.14   | -0.244 | 0.107  |
| A011915_01 |    | 0.539  | NA     | -0.827 | NA     | -0.472 | NA     | NA     | NA     |
| A011921_01 |    | 0.272  | NA     | 0.548  | 0.456  | 0.41   | NA     | 0.154  | 0.091  |
| A011932_01 |    | -0.327 | -0.4   | -0.145 | -0.092 | 0.78   | 0.897  | 0.979  | 0.965  |
| A011935_01 | NA | NA     | -0.215 | NA     |        | -0.538 | NA     | -0.406 | NA     |
| A011936_01 | NA | NA     | -0.06  | -0.103 | NA     | NA     |        | -0.103 | -0.271 |
| A011941_01 |    | 0.091  | 0.079  | -0.685 | NA     | -0.051 | 0.194  | 0.206  | NA     |
| A011942_01 |    | -0.187 | -0.326 | -0.216 | -0.055 | -0.739 | -0.529 | -0.447 | -0.33  |
| A011946_01 |    | 0.135  | 0.088  | 0.207  | 0.18   | -0.084 | 0.044  | -0.488 | -0.229 |
| A011949_01 | NA | NA     | -1.057 | -0.741 | -1.096 | -1.231 | -0.739 | -0.785 | -0.785 |
| A011950_01 |    | 0.32   | 0.174  | -0.179 | -0.22  | 0.345  | 0.096  | 0.353  | 0.27   |
| A011957_01 |    | -1.129 | -0.973 | -0.045 | 0.019  | 0.105  | 0.158  | 0.117  | 0.228  |
| A011963_01 |    | 0.255  | 0.458  | -0.536 | -0.413 | -0.017 | -0.085 | -0.423 | -0.39  |
| A011965_01 |    | 0.818  | 0.346  | -0.361 | -0.26  | 0.041  | 0.276  | 0.126  | 0.596  |
| A011966_01 |    | 0.077  | 0.026  | 0.065  | 0.146  | -0.204 | -0.186 | -0.104 | -0.075 |
| A011967_01 |    | -0.496 | NA     | 0.167  | 0.049  | -0.221 | -0.165 | -0.126 | -0.238 |
| A011976_01 |    | 0.21   | 0.567  | 0.132  | -0.027 | 0.797  | 0.399  | 0.757  | 0.572  |
| A011977_01 |    | 0.058  | -0.162 | 0.191  | 0.246  | 0.203  | 0.141  | -0.112 | 0.037  |
| A011978_01 |    | -0.002 | -0.297 | -0.058 | -0.125 | -0.356 | -0.505 | -0.214 | -0.295 |
| A011985_01 | NA | NA     | 0.275  | 0.166  | -0.121 | 0.162  | 0.044  | 0.044  | 0.029  |
| A011986_01 |    | -0.211 | -0.566 | -0.239 | -0.13  | -0.621 | -0.586 | -0.49  | -0.398 |
| A011988_01 |    | -0.673 | -0.703 | -0.526 | -0.533 | -0.746 | -0.813 | -0.716 | -0.806 |
| A011992_01 |    | 0.458  | 0.204  | 0.033  | 0.21   | 0.066  | 0.091  | -0.013 | 0.275  |
| A011995_01 |    | -1.064 | -0.374 | -0.248 | 0.026  | -0.675 | -0.197 | -0.179 | 0.13   |
| A011996_01 |    | -0.083 | NA     | 0.286  | 0.272  | -0.068 | -0.036 | 0.29   | 0.237  |
| A012001_01 |    | 0.297  | 0.326  | -0.023 | -0.13  | 0.25   | 0.715  | 0.321  | 0.237  |
| A012008_01 | NA |        | -0.423 | -0.168 | -0.253 | -0.15  | -0.182 | -0.226 | -0.172 |

|            |    |           |        |           |           |           |         |           |        |
|------------|----|-----------|--------|-----------|-----------|-----------|---------|-----------|--------|
| A012009_01 |    | 0.587     | 0.417  | 0.334     | 0.029     | 0.39      | -0.001  | 0.309     | 0.005  |
| A012010_01 |    | -0.198    | 0.108  | -0.339    | -0.134    | -0.24     | 0.221   | 0.243     | 0.447  |
| A012011_01 |    | -0.02     | -0.107 | 0.235     | 0.037     | -0.177    | -0.237  | 0.135     | -0.134 |
| A012012_01 |    | -0.53 NA  |        | 0.024     | 0.039     | 0.103     | 0.25    | 0.014     | -0.054 |
| A012013_01 | NA |           | NA     | 0.359     | 0.013 NA  |           | NA      | -0.493    | -1.103 |
| A012014_01 |    | -0.5      | -0.268 | -0.278    | -0.276    | 0.365     | 0.466   | 0.436     | 0.423  |
| A012021_01 |    | 0.154     | 0.122  | -0.237    | -0.081    | -0.439    | -0.276  | -0.341    | -0.383 |
| A012028_01 |    | -1.068    | -1.031 | -2.347    | -1.764    | -1.675    | -1.702  | -1.785    | -2.169 |
| A012030_01 |    | -0.072    | 0.166  | -0.039    | 0.233     | 0.301     | 0.443   | 0.7       | 1.027  |
| A012031_01 | NA |           | NA     | -0.611    | -0.605 NA |           | NA      | -0.024    | -0.171 |
| A012033_01 |    | -0.212    | -0.213 | 0.236     | 0.145     | 0.135     | -0.316  | 0.139     | -0.022 |
| A012039_01 |    | -1.297    | -1.443 | -0.685    | -0.664    | -1.171    | -0.826  | -0.452    | -0.84  |
| A012043_01 |    | 0.005 NA  |        | -0.199    | -0.213    | -0.096 NA |         | -0.288    | -0.42  |
| A012046_01 |    | 0.527 NA  |        | 0.228     | 0.052 NA  |           | NA      | -0.035 NA |        |
| A012049_01 |    | -0.064    | -0.015 | 0.057     | 0.072     | 1.302     | 1.181   | 1.153     | 1.417  |
| A012050_01 | NA |           | NA     | -0.398    | -0.319 NA |           | -0.124  | -0.161    | -0.317 |
| A012060_01 |    | -0.049    | -0.021 | -0.25     | -0.225    | -0.024    | -0.193  | -0.233    | -0.355 |
| A012066_01 |    | -0.09     | -0.061 | 0.301     | 0.304     | 0.265     | 0.23    | 0.144     | 0.213  |
| A012068_01 | NA |           | NA     | 0.198     | 0.163 NA  |           | NA      | NA        | NA     |
| A012069_01 |    | -0.629    | -0.578 | -0.106    | 0.008     | 0.145     | 0.096   | 0.215     | 0.117  |
| A012075_01 |    | -0.301    | -0.185 | 0.437     | 0.209     | 0.043     | 0.015   | -0.224    | -0.322 |
| A012076_01 |    | -0.112    | -0.112 | 0.288     | 0.124     | 0.069     | -0.062  | 0.015     | -0.342 |
| A012078_01 |    | -0.104    | 0.068  | 0.151     | 0.053     | 0.43      | 0.352   | 0.394     | 0.218  |
| A012079_01 |    | -0.15     | -0.192 | 0.227     | 0.147     | 0.338     | 0.108   | 0.325     | 0.222  |
| A012080_01 |    | -0.537    | -0.953 | -2.415    | -2.154    | -1.861    | -1.88   | -2.069 NA |        |
| A012084_01 |    | 0.142     | 0.055  | 0.002     | -0.082    | 0.377     | 0.173   | 0.27      | 0.201  |
| A012085_01 |    | 0.075     | 0.143  | 0.172     | 0.082     | 0.604     | 0.105   | 0.385     | 0.288  |
| A012086_01 |    | 0.101     | 0.099  | 0.138     | 0.054     | 0.174     | 0.192   | 0.342     | 0.171  |
| A012088_01 |    | 0.339     | 0.175  | -0.396    | -0.263    | 0.141     | 0.066   | -0.047    | 0.18   |
| A012091_01 |    | 0.538     | 0.828  | 0.669     | 0.619     | 1.052     | 1.039   | 0.374     | 0.484  |
| A012092_01 |    | -0.117    | -0.129 | -0.148    | 0.004     | -0.265    | -0.296  | -0.271    | -0.108 |
| A012093_01 |    | 0.276     | -0.089 | -0.708    | -0.424    | -0.424    | -0.279  | -0.414    | -0.003 |
| A012098_01 |    | 0.254     | -0.039 | -0.212    | -0.233    | 0.273     | 0.025   | 0.314     | 0.226  |
| A012104_01 |    | 0.07      | 0.228  | 0.361     | 0.336     | 0.472     | 0.627   | 0.716     | 0.804  |
| A012108_01 |    | -0.36     | -0.051 | -0.122    | -0.232    | -0.225    | -0.076  | -0.07     | -0.243 |
| A012113_01 |    | 0.599     | 0.644  | -0.144    | -0.055    | 0.265     | 0.794   | 0.648     | 0.924  |
| A012115_01 |    | -0.644    | -0.726 | -0.159    | -0.03     | -1.005    | -0.884  | -0.656    | -0.731 |
| A012116_01 |    | 0.845     | 0.438  | 0.068     | 0.08      | 1.222     | 0.696   | 1.189     | 0.989  |
| A012117_01 |    | 0.618     | 0.482  | -0.24     | -0.298    | -0.245    | -0.138  | -0.065    | -0.163 |
| A012119_01 |    | 0.511     | 0.719  | -0.238    | -0.241    | 1.039     | 1.158   | 1.137     | 1.294  |
| A012120_01 | NA |           | NA     | -0.11     | -0.091    | 0.044     | 0.125   | 0.041     | 0.128  |
| A012123_01 |    | -0.007    | 0.058  | 0.426     | 0.079     | -0.386    | -0.25   | -0.014    | -0.469 |
| A012125_01 | NA |           | NA     | -0.02     | -0.007 NA |           | NA      | -0.518    | -0.616 |
| A012126_01 |    | 0.239     | 0.124  | 0.412     | 0.424     | 0.332     | 0.056   | -0.093    | 0.017  |
| A012127_01 | NA |           | NA     | 0.098     | 0.285     | 0.18      | 0.325   | -0.044    | 0.096  |
| A012129_01 |    | 0.508     | 0.163  | 0.173     | 0.153     | -0.137    | -0.305  | -0.125    | -0.167 |
| A012130_01 |    | 0.463     | 0.234  | -0.21     | -0.176    | 0.302     | 0.211   | -0.008    | 0.093  |
| A012131_01 |    | -1.056    | -0.95  | -0.86     | -0.67     | -1.292    | -1.036  | -0.719    | -0.705 |
| A012132_01 |    | 0.461     | -0.221 | -0.099    | -0.101    | -0.091    | -0.436  | -0.23     | -0.258 |
| A012134_01 |    | -0.405 NA |        | -0.014    | 0.061     | 0.288     | 0.269   | 0.281     | 0.139  |
| A012141_01 |    | -0.104    | 0.087  | 0.099     | -0.129    | -0.916    | -0.359  | -0.084    | -0.285 |
| A012144_01 |    | -0.45 NA  |        | -0.1      | -0.141    | 0.356     | 0.336   | 0.539     | 0.422  |
| A012145_01 |    | -1.24     | -0.373 | -0.094    | -0.009    | -0.565    | -0.323  | -0.336    | -0.239 |
| A012149_01 |    | 0.154     | 0.126  | 0.211     | 0.186     | -0.219    | 0.152   | -0.207    | -0.07  |
| A012150_01 |    | 0.032     | 0.596  | 0.008     | -0.109    | -0.056    | 0.247   | 0.07      | 0.066  |
| A012155_01 |    | -0.692 NA |        | -0.038    | -0.038    | -0.206    | -0.199  | 0.257     | 0.041  |
| A012158_01 | NA |           | NA     | 0.226     | 0.277     | 0.009 NA  |         | -0.099    | -0.009 |
| A012159_01 |    | -1.926    | -2.063 | -1.398    | -1.062    | -1.866    | -1.309  | -1.065    | -1.077 |
| A012163_01 |    | 1.249     | 0.843  | -0.172 NA |           | 0.82      | 0.726   | 0.725     | 0.84   |
| A012167_01 |    | 0.083     | -0.312 | -0.178    | -0.08     | -0.411    | -0.427  | -0.296    | -0.275 |
| A012168_01 |    | 0.164     | 0.025  | -0.315 NA |           | 0.445     | 0.457   | 0.474     | 0.763  |
| A012171_01 |    | 0.359     | 0.169  | -0.172    | 0.007     | 0.401     | 0.14 NA |           | 0.16   |
| A012174_01 |    | 0.129     | -0.13  | 0.03      | 0.077     | 0.06      | -0.124  | -0.151    | -0.244 |
| A012175_01 |    | 0.409     | 0.343  | 0.334     | 0.369     | -0.483    | -0.395  | -0.337    | -0.162 |
| A012176_01 |    | 0.547     | 0.453  | 0.538     | 0.427     | 0.258     | 0.268   | 0.118     | 0.102  |
| A012178_01 |    | -0.97     | -0.668 | 0.419     | 0.215     | -0.241    | -0.309  | -0.078    | 0.098  |
| A012184_01 |    | 0.902     | 0.459  | -0.066    | -0.023    | 0.413     | 0.456   | 0.407     | 0.544  |
| A012185_01 |    | -1.14     | -0.96  | -0.813    | -0.717    | -0.42     | -0.396  | -0.125    | -0.285 |

|            |    |           |           |           |           |           |           |           |        |
|------------|----|-----------|-----------|-----------|-----------|-----------|-----------|-----------|--------|
| A012186_01 |    | 0.744     | 0.645     | -0.265    | -0.258    | 0.483     | 0.482     | 0.593     | 0.662  |
| A012193_01 |    | 0.764     | 0.475     | 0.322     | 0.219     | 0.281     | 0.129     | 0.2       | 0.169  |
| A012200_01 |    | 0.471     | 0.078     | 0.001     | -0.017    | -0.355    | -0.442    | -0.356    | -0.479 |
| A012203_01 |    | -0.564    | -0.664    | 0.033     | 0.104     | -0.662    | -0.757    | -0.797    | -0.797 |
| A012207_01 |    | -0.782    | -0.706    | 0.302     | -0.251    | -0.334    | -0.258    | 0.454     | -0.249 |
| A012210_01 |    | -0.673    | -0.25     | 0.215     | 0.088     | -0.209    | -0.203    | 0.09      | -0.089 |
| A012213_01 |    | -0.208    | -0.453    | -0.005    | 0.272     | -0.761    | -0.558    | -0.373    | -0.161 |
| A012214_01 |    | 0.201     | 0.499     | 0.215     | 0.138     | -0.684    | 0.235     | 0.274     | 0.026  |
| A012215_01 | NA |           | 0.408     | 0.352     | 0.211     | 0.277     | -0.108    | -0.109    | -0.203 |
| A012218_01 |    | -1.057    | -0.838    | -0.1      | -0.013    | -0.267    | -0.23     | -0.058    | -0.058 |
| A012219_01 |    | 0.52      | 0.334     | -0.123    | 0.027     | 0.235     | 0.128 NA  |           | 0.2    |
| A012221_01 |    | -0.13     | -0.08     | 0.063     | 0.017     | -0.052    | 0.11      | 0.242     | 0.098  |
| A012223_01 | NA | NA        |           | 0.166     | 0.104 NA  |           | NA        | 0.037 NA  |        |
| A012229_01 | NA | NA        |           | 0.093     | 0.044     | -0.516 NA |           | -0.411    | -0.441 |
| A012231_01 | NA | NA        |           | 0.311     | 0.059     | 0.458     | 0.311     | 0.367     | 0.366  |
| A012234_01 |    | 0.278     | 0.082     | -0.275    | -0.367    | 0.095     | 0.033     | 0.246     | 0.211  |
| A012237_01 |    | 0.376     | -0.084    | 0.042     | 0.122     | -0.138 NA |           | -0.371    | -0.366 |
| A012239_01 |    | 0.544 NA  |           | -0.358 NA | NA        | NA        | NA        | NA        |        |
| A012247_01 |    | -0.908    | -0.52     | -0.2      | -0.193    | -0.569    | -0.246    | -0.469    | -0.403 |
| A012251_01 |    | 0.084     | -0.314    | -1.089    | -0.858    | -0.578    | -0.787    | -0.596    | -0.558 |
| A012254_01 |    | 0.441     | 0.291     | 0.248     | 0.165     | 0.124     | 0.323     | 0.237     | 0.192  |
| A012256_01 |    | 0.36      | 0.226     | -0.011    | 0.143     | 1.018     | 1.146     | 1.157     | 1.322  |
| A012257_01 |    | 1.086     | 1.148     | 0.461     | 0.332     | 0.287     | 0.102     | 0.321     | 0.246  |
| A012259_01 | NA |           | -1.902 NA | NA        | NA        |           | -2.057 NA | NA        |        |
| A012264_01 |    | 0.255     | 0.008     | -0.179    | -0.232 NA |           | -0.306 NA |           | -0.182 |
| A012272_01 |    | -0.199    | -0.032    | -0.387    | -0.196    | -0.213    | 0.124     | 0.205     | 0.405  |
| A012275_01 |    | 0.124     | 0.348     | 0.345     | 0.288     | 0.897     | 0.842     | 0.614     | 0.597  |
| A012276_01 |    | -0.128    | -0.144    | 0.03      | -0.055    | -0.042    | 0.197     | 0.029     | 0.014  |
| A012277_01 |    | -1.05 NA  |           | 0.242     | 0.011     | -1.224    | -0.876    | -0.124    | -0.166 |
| A012283_01 |    | 1.026     | 0.82      | 0.175     | 0.136     | 0.258     | 0.34      | 0.247     | 0.437  |
| A012291_01 |    | 0.03      | 0.048     | 0.065     | -0.018    | 0.318     | 0.454     | 0.276     | 0.276  |
| A012293_01 |    | 0.015     | -0.259    | -0.393    | -0.319    | -0.424    | -0.351    | -0.394    | -0.114 |
| A012294_01 |    | 0.361     | 0.209     | -0.372    | -0.126    | 0.186     | 0.22      | 0.142     | 0.379  |
| A012295_01 |    | 0.044     | -0.104    | -0.027    | -0.084    | -0.115    | -0.108    | 0.074     | 0.021  |
| A012299_01 |    | 0.138     | 0.059     | 0.002     | -0.076    | 0.404     | 0.136     | 0.119     | -0.035 |
| A012309_01 |    | -1.329    | -0.977    | -0.807    | -0.474    | -1.178    | -0.867    | -0.638    | -0.86  |
| A012311_01 |    | -0.765    | -0.711    | -0.878    | -0.606    | -0.729    | -0.299    | -0.24     | -0.336 |
| A012313_01 |    | 0.204     | 0.001     | -0.131    | -0.074    | 0.729     | 0.379     | 0.378     | 0.345  |
| A012321_01 | NA | NA        |           | 0.274     | 0.368 NA  | NA        |           | -0.487    | -0.46  |
| A012323_01 | NA | NA        |           | 0.112     | 0.015     | -0.175    | -0.34     | -0.287    | -0.284 |
| A012324_01 |    | -1.497 NA |           | -1.467    | -1.095    | -1.473    | -1.379    | -1.413    | -1.628 |
| A012325_01 |    | -1.425    | -0.337    | 0.373     | 0.311     | -0.132    | 0.421     | 0.344     | 0.369  |
| A012326_01 |    | 0.258     | 0.264     | -0.025    | -0.029    | 0.26      | 0.179     | 0.173     | 0.221  |
| A012331_01 |    | -2.222    | -2.77     | -2.721    | -1.934    | -2.326    | -1.924    | -1.787    | -1.987 |
| A012332_01 |    | 0.189     | -0.129 NA |           | 0.284     | -0.031    | -0.06     | 0.125     | 0.146  |
| A012334_01 |    | -0.759    | -0.765    | 0.315     | 0.088     | -0.789    | -0.532    | -0.124    | -0.564 |
| A012336_01 |    | -0.216    | -0.462    | -0.887    | -0.648    | -0.099    | 0.196     | 0.032     | 0.204  |
| A012337_01 |    | -0.037    | -0.218    | -0.092    | 0.025     | -0.573 NA |           | -0.536    | -0.432 |
| A012340_01 |    | 0.318     | 0.205     | -0.04     | -0.215    | 0.13      | -0.03     | 0.328     | 0.167  |
| A012341_01 |    | -0.09 NA  |           | -0.132 NA |           | -0.453 NA | NA        | NA        |        |
| A012351_01 |    | -0.667    | -0.768    | 0.01      | -0.011    | -0.175    | -0.251    | -0.03     | -0.225 |
| A012353_01 |    | -0.373    | -0.297    | 0.171     | 0.324     | -0.152    | -0.105    | -0.067    | -0.063 |
| A012354_01 |    | 0.155     | 0.019     | -0.104    | -0.13     | 0.357     | 0.383     | 0.281     | 0.353  |
| A012357_01 |    | 0.174     | -0.033    | -0.145    | -0.098    | 0.005     | -0.095    | -0.143    | 0.017  |
| A012360_01 |    | 0.362     | 0.483     | 0.103     | 0.07      | 0.181     | 0.183     | 0.098     | 0.067  |
| A012364_01 |    | 0.21      | 0.167     | -0.019    | 0.29      | -0.445    | -0.008    | -0.379    | 0.146  |
| A012366_01 | NA | NA        |           | 0.194     | 0.286 NA  | NA        |           | -0.088 NA |        |
| A012367_01 |    | 0.199     | 0.131     | -0.182    | -0.193    | 0.212     | 0.511     | 0.508     | 0.639  |
| A012369_01 | NA | NA        |           | -0.39 NA  | NA        | NA        |           | -0.594    | -0.923 |
| A012370_01 |    | 0.404     | 0.287     | 0.262     | 0.224     | 0.468     | 0.313     | 0.199     | 0.18   |
| A012371_01 |    | -0.891    | -0.698    | -0.378    | -0.158    | -1.538    | -1.136    | -0.504    | -0.536 |
| A012372_01 |    | -1.502    | -1.263    | -1.097    | -0.813    | -0.82     | -0.628    | -0.626    | -0.777 |
| A012373_01 |    | 0.236     | 0.455     | 0.366     | 0.29      | -0.546    | -0.401    | -0.344    | -0.337 |
| A012375_01 |    | -0.166    | 0.115     | 0.196     | 0.258     | 0.525     | 0.425     | 0.299     | 0.328  |
| A012377_01 | NA | NA        |           | 0.194 NA  | NA        | NA        | NA        |           | 0.302  |
| A012379_01 |    | -0.519    | -0.132    | 0.401     | 0.223     | 0.468     | 0.097     | -0.093    | 0.034  |
| A012381_01 |    | 0.149     | 0.025     | -0.073    | 0.01      | 0.006     | -0.041    | 0.011     | -0.094 |
| A012382_01 |    | -0.91 NA  |           | -0.571    | -0.435    | -0.271    | -0.373    | -0.092    | -0.216 |



|            |    |           |        |           |           |           |           |           |        |
|------------|----|-----------|--------|-----------|-----------|-----------|-----------|-----------|--------|
| A012385_01 |    | 0.137     | 0.2    | 0.207     | 0.222     | 0.073     | 0.185     | 0.067     | -0.059 |
| A012386_01 |    | 0.788     | 0.768  | -0.275    | -0.29     | 0.797     | 0.485     | 0.366     | 0.354  |
| A012388_01 |    | 0.084     | 0.332  | 0.014     | 0.158     | 0.026     | 0.027     | -0.108    | 0.045  |
| A012390_01 |    | 0.552     | 0.31   | 0.024 NA  |           | 0.308     | 0.218     | 0.28 NA   |        |
| A012393_01 |    | -0.355    | -0.138 | -0.26     | -0.236    | -0.065    | -0.033    | -0.13     | -0.109 |
| A012396_01 |    | -1.088    | -0.958 | 0.164     | 0.205     | -0.306    | -0.343    | -0.065    | -0.1   |
| A012397_01 |    | -1.297 NA |        | 0.573     | 0.408     | -0.337 NA |           | 0.21      | -0.005 |
| A012398_01 |    | 0.55      | 0.613  | 0.336     | 0.26      | 0.525     | 0.724     | 0.514     | 0.526  |
| A012400_01 |    | -0.9      | -0.415 | 0.087     | 0.013     | 0.196     | 0.315     | -0.063    | -0.059 |
| A012402_01 | NA |           | -0.262 | 0.055     | 0.012     | 0.049     | 0.015     | 0.178     | 0.03   |
| A012404_01 | NA |           | 0.355  | 0.535     | 0.479 NA  |           | -0.113    | 0.009     | -0.205 |
| A012407_01 |    | 0.15      | 0.218  | 0.032     | -0.054    | 0.082     | 0.136     | 0.176     | 0.042  |
| A012410_01 | NA | NA        |        | 0.255     | 0.372 NA  | NA        |           | 0.014     | -0.006 |
| A012415_01 |    | 1.305     | 1.061  | 1.167     | 0.969     | 0.991     | 0.862     | 0.548     | 0.578  |
| A012421_01 |    | -0.242    | -0.075 | 0.345     | 0.454     | 0.675     | 0.585     | 0.131     | 0.297  |
| A012422_01 | NA |           | -1.188 | -0.171    | -0.065    | -1.16     | -0.846    | -0.54     | -0.369 |
| A012423_01 |    | -0.432 NA |        | 0.268     | 0.292     | 0.077     | -0.042    | 0.07      | -0.131 |
| A012425_01 |    | -0.874    | -0.363 | 0.81      | 0.396     | -0.128    | -0.327    | -0.201    | -0.432 |
| A012428_01 |    | 0.36      | 0.102  | -0.049    | -0.182    | -0.134    | -0.211    | -0.069    | -0.044 |
| A012429_01 |    | -1.388 NA | NA     | NA        | NA        |           | -2.023 NA | NA        |        |
| A012430_01 |    | -0.613    | -0.759 | -0.036    | -0.006    | -1.418    | -1.142    | -0.895    | -0.677 |
| A012440_01 |    | 0.429 NA  |        | 0.49      | 0.308     | 0.522 NA  |           | 0.278     | 0.086  |
| A012442_01 |    | 0.221     | 0.534  | 0.192     | 0.099     | 0.129     | 0.244     | 0.354     | 0.248  |
| A012445_01 |    | -0.26     | 0.062  | -0.148    | -0.009    | 0.091     | 0.187     | -0.161    | -0.241 |
| A012449_01 | NA | NA        |        | -0.405    | -0.313 NA | NA        |           | -0.754    | -0.737 |
| A012451_01 |    | 0.071     | 0.081  | 0.043     | -0.063    | 0.434     | 0.217     | 0.399     | 0.175  |
| A012454_01 |    | -0.482    | -0.977 | -0.94     | -0.916    | -0.979    | -0.916    | -0.571    | -0.904 |
| A012458_01 |    | -0.396    | -0.354 | -1.166    | -0.912    | -0.448    | 0.208     | 0.068     | 0.467  |
| A012460_01 |    | 0.109 NA  |        | 0.152     | -0.107 NA | NA        |           | -0.184    | -0.501 |
| A012464_01 |    | -0.188    | -0.015 | -0.2      | 0.015     | 0.027     | 0.163     | -0.105    | 0.108  |
| A012466_01 | NA | NA        |        | 0.426     | 0.313 NA  | NA        |           | -0.078    | -0.197 |
| A012467_01 |    | 0.68      | 0.721  | 0.586     | 0.426     | 0.635     | 0.39      | 0.095     | 0.095  |
| A012468_01 |    | 0.732     | 0.563  | -0.253    | -0.314    | 0.72      | 0.621     | 0.471     | 0.458  |
| A012469_01 |    | 0.459     | 0.377  | -0.008 NA |           | 0.443     | 0.283     | 0.166     | 0.239  |
| A012473_01 | NA | NA        |        | 0.04      | 0.017 NA  | NA        |           | -0.284    | -0.287 |
| A012479_01 |    | -0.724    | -0.856 | -0.471    | -0.473    | -0.481 NA | NA        |           | -0.719 |
| A012482_01 |    | 0.281     | 0.161  | -0.207    | -0.164    | 0.214     | 0.105     | -0.049    | 0.024  |
| A012487_01 |    | 0.817     | 0.69   | -0.206    | -0.375    | -0.03     | -0.382    | -0.446    | -0.354 |
| A012493_01 |    | -0.106 NA |        | -0.835    | -0.87     | -0.484    | -0.411    | -0.558 NA |        |
| A012499_01 |    | -0.073    | -0.15  | -0.018    | -0.097    | 0.031     | -0.163    | 0.013     | -0.168 |
| A012501_01 | NA |           | -0.005 | -0.176    | -0.157    | -0.018    | -0.168    | -0.352    | -0.425 |
| A012502_01 |    | 0.18      | 0.179  | 0.222     | 0.227     | 0.082     | 0.054     | 0.149     | 0.23   |
| A012504_01 |    | 0.433     | 0.264  | 0.176     | 0.081     | 0.545     | 0.159     | 0.365     | 0.227  |
| A012513_01 |    | 0.141     | 0.064  | 0.549     | 0.458     | 0.408     | 0.453     | 0.194     | 0.164  |
| A012518_01 |    | 0.283     | 0.115  | 0.238     | 0.28      | 0.843     | 0.488     | 0.51      | 0.449  |
| A012526_01 |    | -0.129    | -0.128 | -0.215    | -0.213    | -0.352 NA |           | -0.224    | -0.326 |
| A012527_01 | NA | NA        |        | 0.276     | 0.113 NA  | NA        |           | -0.269    | -0.527 |
| A012532_01 |    | -0.974    | -0.661 | 0.232     | 0.229     | -1.019    | -0.747    | -0.244    | -0.368 |
| A012533_01 |    | -0.964    | -0.505 | 0.149     | 0.144     | 0.099     | -0.027    | 0.224     | 0.229  |
| A012537_01 |    | -0.392    | -0.474 | 0.112     | -0.001    | 0.209     | 0.045     | 0.281     | 0.167  |
| A012543_01 |    | 0.828     | 0.68   | -0.041 NA |           | 0.42      | 0.507     | 0.701     | 0.974  |
| A012557_01 | NA |           | -0.541 | 0.356     | 0.291     | 0.224     | 0.303     | 0.2       | 0.243  |
| A012562_01 |    | 0.945     | 0.355  | -0.232    | -0.096    | 0.545     | 0.461     | 0.071     | 0.209  |
| A012563_01 |    | 0.169     | 0.442  | -0.008    | -0.092    | 0.167     | 0.319     | 0.108     | 0.252  |
| A012565_01 |    | 0.368     | 0.113  | -0.202    | -0.274    | 0.135     | 0.126     | 0.036     | 0.29   |
| A012566_01 |    | 0.009     | 0.113  | -0.717    | -0.601    | -0.009    | 0.088     | 0.307     | 0.517  |
| A012567_01 |    | -0.546    | -0.306 | 0.096     | -0.001    | -0.06     | 0.112     | 0.186     | 0.104  |
| A012572_01 |    | 0.234     | 0.55   | 0.516     | 0.582     | 0.479     | 0.734     | 0.402     | 0.676  |
| A012577_01 |    | 0.893     | 0.817  | 0.096 NA  |           | 0.871     | 0.658     | 0.626     | 0.837  |
| A012578_01 |    | -1.083    | -1.209 | -0.359    | -0.094    | -1.787    | -1.538    | -0.969    | -0.751 |
| A012579_01 | NA |           | 0.745  | -0.036    | 0.068     | 1.111     | 0.746     | 0.034     | 0.152  |
| A012580_01 |    | 0.506     | 0.114  | -0.21     | -0.162    | -0.133    | -0.077    | -0.07     | 0.106  |
| A012581_01 |    | -1.442 NA |        | -1.312    | -0.856    | -1.451 NA | NA        | NA        |        |
| A012585_01 |    | -0.411    | -0.51  | -1.019    | -0.837    | -0.068    | -0.198    | 0.452     | 0.246  |
| A012587_01 |    | 0.268     | 0.264  | -0.131    | -0.042    | 0.055     | -0.324    | -0.326    | -0.2   |
| A012590_01 |    | -1.337    | -1.267 | -0.995    | -0.919    | -1.158    | -0.935    | -0.838    | -0.831 |
| A012591_01 |    | 0.499     | 0.104  | -0.458    | -0.515 NA |           | -0.101    | 0.105     | -0.116 |
| A012594_01 |    | 0.577     | 0.307  | 0.031 NA  |           | 0.406     | 0.43      | -0.028 NA |        |

|            |    |        |        |        |        |        |        |        |        |
|------------|----|--------|--------|--------|--------|--------|--------|--------|--------|
| A012595_01 |    | 0.138  | 0.232  | 0.256  | 0.277  | 0.79   | 0.66   | 0.646  | 0.707  |
| A012597_01 |    | 0.04   | 0.29   | -0.071 | 0.027  | -0.212 | 0.196  | 0.186  | 0.403  |
| A012604_01 |    | 0.086  | -0.035 | -0.184 | -0.196 | -0.02  | -0.228 | -0.173 | -0.266 |
| A012607_01 |    | 0.571  | 0.523  | -0.167 | -0.149 | -0.241 | -0.341 | -0.411 | -0.22  |
| A012618_01 |    | 0.273  | 0.372  | -0.029 | -0.136 | 0.385  | 0.318  | 0.36   | 0.266  |
| A012621_01 |    | 0.442  | 0.21   | 0.052  | -0.098 | 0.8    | 0.378  | 0.488  | 0.422  |
| A012623_01 |    | -0.202 | -0.023 | -0.185 | -0.167 | -0.118 | 0.159  | 0.182  | 0.299  |
| A012625_01 |    | -0.452 | -0.238 | -0.105 | 0.02   | -0.176 | -0.053 | -0.168 | -0.18  |
| A012626_01 |    | 0.907  | 0.454  | 0.296  | -0.012 | 1.089  | 0.744  | 0.492  | 0.496  |
| A012627_01 |    | 0.081  | 0.056  | 0.129  | -0.066 | 0.334  | 0.05   | 0.179  | 0.034  |
| A012628_01 |    | 1.38   | 1.266  | 0.714  | 0.642  | 0.621  | 0.469  | 0.431  | 0.374  |
| A012631_01 |    | 0.887  | NA     | 0.328  | 0.333  | NA     | 0.284  | 0.006  | NA     |
| A012633_01 | NA |        | -0.963 | -0.604 | -0.519 | NA     | -0.773 | -0.529 | -0.488 |
| A012637_01 |    | 0.094  | 0.337  | -0.492 | -0.411 | 0.087  | 0.157  | 0.068  | 0.12   |
| A012640_01 |    | -0.729 | NA     | -0.326 | NA     | -0.662 | NA     | NA     | NA     |
| A012641_01 |    | -0.49  | -0.478 | -0.214 | -0.175 | -0.634 | -0.828 | -0.38  | -0.271 |
| A012646_01 |    | -0.051 | 0.274  | -0.714 | -0.491 | 0.031  | 0.331  | -0.081 | 0.083  |
| A012647_01 | NA |        | NA     | -0.963 | -1.012 | NA     | NA     | -0.783 | -0.847 |
| A012648_01 |    | 0.612  | 0.485  | 0.123  | 0.225  | 0.342  | 0.444  | 0.355  | 0.367  |
| A012649_01 |    | 0.331  | 0.242  | -0.276 | -0.29  | 0.235  | 0.096  | NA     | -0.445 |
| A012650_01 |    | -0.305 | -0.523 | -0.105 | -0.08  | -0.19  | -0.277 | -0.339 | -0.422 |
| A012651_01 |    | 0.307  | 0.396  | 0.293  | 0.267  | 0.251  | 0.368  | 0.472  | 0.523  |
| A012653_01 |    | -0.2   | -0.339 | 0.084  | -0.038 | -0.101 | -0.23  | 0.068  | -0.14  |
| A012654_01 |    | -1.047 | -1.728 | -0.888 | -0.713 | -1.485 | -1.614 | -0.873 | -0.998 |
| A012655_01 |    | 0.149  | 0.31   | 0.392  | 0.282  | -0.271 | -0.016 | -0.319 | -0.378 |
| A012657_01 |    | 0.442  | 0.234  | -0.154 | -0.221 | 0.584  | 0.427  | 0.528  | 0.483  |
| A012660_01 |    | 0.437  | NA     | -0.126 | NA     | NA     | NA     | NA     | NA     |
| A012664_01 |    | 0.099  | 0.402  | 0.101  | 0.052  | 0.141  | 0.436  | 0.114  | 0.08   |
| A012665_01 | NA |        | NA     | 0.41   | 0.085  | NA     | NA     | 0.393  | 0.201  |
| A012672_01 |    | -0.213 | 0.514  | -0.123 | 0.043  | -0.151 | 0.588  | 0.475  | 0.647  |
| A012678_01 |    | -0.04  | 0.316  | 0.671  | 0.626  | 1.212  | 0.953  | 0.805  | 0.821  |
| A012680_01 | NA |        | NA     | -0.017 | -0.017 | NA     | NA     | -0.355 | -0.196 |
| A012685_01 |    | 0.362  | 0.416  | 0.165  | 0.11   | 0.652  | 0.504  | 0.309  | 0.313  |
| A012694_01 |    | -0.936 | -0.149 | 0.437  | 0.397  | 0.056  | 0.232  | -0.121 | 0.023  |
| A012695_01 |    | -0.202 | -0.07  | -0.137 | -0.092 | 0.582  | 0.346  | 0.233  | 0.152  |
| A012696_01 |    | 0      | -0.395 | -0.125 | -0.167 | -0.226 | -0.261 | -0.131 | -0.157 |
| A012697_01 |    | 0.241  | 0.136  | 0.276  | 0.286  | 0.38   | 0.338  | 0.171  | 0.312  |
| A012700_01 |    | -0.87  | -1.203 | -1.114 | -0.917 | -1.464 | -1.631 | -0.713 | -0.69  |
| A012704_01 |    | -0.465 | NA     | 0.449  | 0.225  | 0.028  | NA     | -0.047 | -0.136 |
| A012705_01 | NA |        | NA     | 0.529  | 0.155  | NA     | NA     | 0.111  | -0.214 |
| A012706_01 |    | 0.28   | 0.098  | 0.03   | -0.051 | 0.14   | -0.098 | 0.038  | -0.152 |
| A012707_01 |    | 0.052  | -0.107 | 0.74   | 0.427  | 0.247  | 0.091  | -0.126 | -0.319 |
| A012710_01 |    | -0.314 | -0.162 | -0.255 | -0.203 | -0.147 | NA     | -0.372 | -0.055 |
| A012712_01 | NA |        | NA     | 0.425  | 0.29   | NA     | NA     | -0.028 | -0.168 |
| A012714_01 |    | 0.31   | 0.194  | -0.114 | -0.189 | 0.107  | 0.036  | 0.132  | -0.084 |
| A012715_01 | NA |        | NA     | 0.18   | NA     | NA     | NA     | NA     | NA     |
| A012722_01 |    | 0.624  | 0.358  | 0.398  | 0.257  | 0.733  | 0.35   | 0.211  | 0.005  |
| A012723_01 |    | -0.072 | 0.379  | -0.106 | -0.176 | -0.528 | -0.044 | 0.022  | 0.04   |
| A012724_01 |    | 0.695  | 0.52   | -0.175 | NA     | 0.807  | 0.55   | 0.51   | 0.467  |
| A012726_01 |    | -0.072 | -0.184 | -0.05  | -0.089 | -0.042 | -0.257 | -0.166 | -0.357 |
| A012728_01 |    | -0.283 | -0.485 | 0.217  | 0.048  | 0.129  | 0.082  | -0.045 | -0.094 |
| A012730_01 |    | -1.064 | -0.751 | -0.131 | -0.101 | -0.853 | NA     | -0.425 | -0.439 |
| A012732_01 |    | -0.245 | 0.03   | 0.009  | 0.195  | 0.945  | 1.209  | 0.86   | 1.151  |
| A012738_01 |    | -0.013 | -0.014 | 0.244  | 0.139  | 0.121  | 0.17   | 0.401  | 0.372  |
| A012739_01 |    | -1.917 | -1.68  | -0.15  | -0.12  | -0.635 | -0.457 | 0.242  | 0.34   |
| A012741_01 |    | 0.598  | 0.568  | -0.088 | -0.079 | 0.37   | 0.349  | 0.41   | 0.399  |
| A012745_01 |    | -0.446 | -0.153 | 0.163  | 0.102  | 0.295  | 0.154  | 0.231  | 0.245  |
| A012747_01 |    | -2.231 | -1.514 | 0.395  | 0.159  | -1.757 | -0.929 | 0.143  | 0.039  |
| A012748_01 |    | -2.69  | -3.16  | -2.731 | -2.434 | -2.63  | -2.289 | -1.394 | -1.726 |
| A012749_01 |    | 0.249  | 0.59   | 0.545  | 0.623  | 0.713  | 0.589  | 0.124  | 0.191  |
| A012752_01 |    | -0.265 | -0.609 | -0.32  | -0.198 | -1.047 | -1.254 | -0.752 | -0.846 |
| A012754_01 |    | -1.691 | -0.64  | 0.2    | 0.349  | 0.178  | 0.518  | 0.429  | 0.73   |
| A012758_01 |    | -0.445 | -0.309 | 0.212  | 0.103  | 0.2    | 0.117  | 0.062  | 0.079  |
| A012760_01 |    | -0.255 | -0.209 | -0.378 | -0.138 | 0.034  | 0.153  | -0.201 | -0.01  |
| A012762_01 |    | 0.497  | NA     | -0.255 | NA     | 0.306  | NA     | NA     | NA     |
| A012767_01 | NA |        | -0.09  | -0.07  | 0.018  | 0.078  | 0.173  | -0.178 | 0.026  |
| A012768_01 |    | 0.248  | 0.33   | -0.044 | -0.003 | 0.258  | 0.227  | 0.038  | 0.059  |
| A012769_01 |    | -0.426 | -0.396 | -1.098 | -0.84  | -0.706 | -0.555 | -0.473 | -0.298 |

|            |    |        |        |        |        |        |    |        |        |        |
|------------|----|--------|--------|--------|--------|--------|----|--------|--------|--------|
| A012770_01 | NA | NA     |        | 0.084  | -0.08  | 0.307  | NA |        | -0.011 | -0.198 |
| A012771_01 |    | -0.102 | 0.007  | 0.095  | 0.192  | 0.287  |    | 0.338  | 0.164  | 0.181  |
| A012772_01 |    | -0.427 | -0.226 | -0.245 | -0.13  | -0.412 |    | -0.336 | -0.507 | -0.322 |
| A012773_01 |    | -1.27  | -1.293 | -0.689 | -0.565 | -1.566 |    | -1.173 | -1.273 | -1.423 |
| A012776_01 |    | 0.451  | 0.008  | -1.099 | -1.107 | -0.209 |    | -0.406 | -0.321 | -0.337 |
| A012778_01 |    | 0.92   | 0.81   | -0.334 | -0.271 | -0.344 |    | -0.264 | -0.088 | -0.101 |
| A012781_01 |    | 0.068  | 0.279  | 0.137  | 0.038  | 0.45   |    | 0.384  | 0.24   | 0.129  |
| A012787_01 |    | -0.631 | -0.168 | -0.323 | -0.21  | -0.15  |    | -0.189 | 0.245  | 0.204  |
| A012788_01 |    | -0.938 | -0.771 | 0.59   | 0.216  | -0.375 |    | -0.45  | -0.269 | -0.584 |
| A012791_01 | NA | NA     |        | 0.541  | 0.297  | NA     |    | NA     | -0.012 | -0.129 |
| A012796_01 | NA | NA     |        | -1.539 | -1.281 | NA     |    | NA     | -1.211 | -1.434 |
| A012797_01 |    | 0.211  | 0.323  | 0.72   | 0.712  | 1.003  |    | 0.831  | 0.32   | 0.245  |
| A012800_01 |    | -0.016 | -0.094 | 0.128  | 0.118  | 0.13   |    | 0.207  | 0.287  | 0.295  |
| A012807_01 |    | -0.586 | -0.268 | -0.112 | -0.112 | -0.34  |    | -0.238 | -0.109 | -0.217 |
| A012810_01 |    | 0.777  | 0.79   | 0.143  | 0.32   | 0.678  |    | 0.796  | 0.438  | 0.557  |
| A012811_01 |    | 0.67   | 0.664  | 0.284  | 0.155  | 0.503  |    | 0.37   | 0.582  | 0.569  |
| A012812_01 |    | -0.586 | -0.747 | -0.06  | 0.16   | 0.012  |    | 0.132  | 0.606  | 0.788  |
| A012813_01 |    | -2.124 | -2.077 | -1.321 | -1.092 | -2.277 | NA |        | -1.681 | -1.764 |
| A012816_01 | NA | NA     |        | -0.205 | NA     | NA     |    | NA     | NA     | NA     |
| A012817_01 |    | 0.013  | -0.076 | 0.277  | 0.114  | 0.258  |    | 0.093  | 0.359  | 0.222  |
| A012818_01 |    | -1.154 | -0.828 | -0.096 | -0.016 | -1.009 |    | -0.872 | -0.629 | -0.545 |
| A012822_01 |    | -0.225 | -0.323 | 0.283  | 0.148  | -0.067 |    | -0.221 | 0.016  | -0.22  |
| A012823_01 | NA | NA     |        | 0.443  | 0.195  | -0.006 | NA |        | 0.04   | -0.226 |
| A012826_01 |    | 0.025  | 0.161  | -0.549 | -0.387 | -0.273 |    | 0.204  | 0.045  | 0.437  |
| A012828_01 |    | -0.515 | -0.064 | -0.311 | -0.145 | -0.803 |    | -0.132 | -0.101 | 0.011  |
| A012829_01 |    | -0.206 | -0.307 | 0.007  | 0.07   | -0.12  |    | -0.09  | -0.054 | -0.026 |
| A012830_01 | NA |        | -0.955 | 0.307  | 0.266  | -0.197 | NA |        | 0.12   | 0.103  |
| A012832_01 |    | -1.918 | -0.831 | -0.53  | -0.359 | 0.055  |    | 0.104  | 0.502  | 0.505  |
| A012834_01 | NA | NA     |        | -0.069 | -0.096 | NA     |    | NA     | -0.705 | -0.745 |
| A012835_01 |    | 0.325  | 0.192  | 0.345  | 0.45   | 0.191  |    | 0.439  | 0.213  | 0.546  |
| A012837_01 | NA | NA     |        | -0.242 | -0.386 | NA     |    | NA     | -0.15  | -0.233 |
| A012838_01 |    | -0.825 | -0.562 | 0.736  | 0.638  | 0.117  |    | 0.035  | -0.341 | -0.279 |
| A012839_01 |    | -0.498 | -0.306 | -0.085 | -0.097 | 1.545  |    | 1.257  | 1.368  | 1.291  |
| A012841_01 | NA | NA     |        | 0.532  | 0.25   | NA     |    | NA     | -0.322 | -0.703 |
| A012844_01 |    | -1.719 | -1.429 | -0.741 | -0.531 | -1.583 |    | -1.007 | -1.023 | -0.953 |
| A012846_01 | NA | NA     |        | 0.201  | 0.153  | 0.363  |    | 0.413  | 0.158  | 0.183  |
| A012847_01 |    | 0.014  | 0.38   | -0.047 | 0.067  | 0.34   |    | 0.476  | 0.066  | 0.191  |
| A012849_01 |    | -0.944 | NA     | 0.189  | 0.062  | -0.124 |    | -0.046 | 0.089  | -0.083 |
| A012854_01 |    | 0.56   | 0.369  | 0.06   | 0.068  | 0.129  |    | 0.099  | -0.013 | 0.004  |
| A012858_01 |    | 1.031  | 0.522  | 0.174  | 0.33   | NA     |    | NA     |        | -0.13  |
| A012860_01 |    | 0.008  | 0.408  | 0.154  | 0.344  | 0.054  |    | 0.731  | 0.279  | 0.556  |
| A012862_01 |    | 0.325  | -0.175 | -0.357 | -0.211 | -0.532 |    | -0.902 | -0.414 | -0.412 |
| A012865_01 |    | 0.002  | 0.363  | 0.345  | 0.368  | 0.814  |    | 1.45   | 0.935  | 1.209  |
| A012872_01 |    | 1.556  | 1.429  | 0.337  | 0.262  | 1.099  |    | 1.182  | 1.069  | 1.414  |
| A012878_01 |    | -0.096 | -0.076 | -0.093 | NA     | 0.145  | NA |        | NA     | NA     |
| A012880_01 |    | -0.91  | -1.235 | -1.813 | -1.485 | -1.341 |    | -1.335 | -1.289 | -1.259 |
| A012881_01 |    | 0.215  | 0.171  | -0.577 | -0.39  | -0.163 |    | 0.05   | -0.143 | 0.181  |
| A012883_01 |    | -1.461 | -1.386 | -0.272 | -0.24  | -1.143 |    | -0.883 | -0.331 | -0.363 |
| A012885_01 |    | 0.515  | 0.075  | 0.207  | 0.242  | -0.038 |    | -0.112 | 0.025  | 0.111  |
| A012887_01 |    | 0.531  | 0.051  | -0.02  | 0.159  | -0.421 |    | -0.401 | -0.538 | -0.279 |
| A012888_01 |    | 0.763  | 0.473  | 0.532  | 0.299  | 0.777  |    | 0.36   | 0.746  | 0.538  |
| A012889_01 | NA | NA     |        | -3.321 | -2.447 | NA     |    | NA     | -1.785 | -2.236 |
| A012890_01 |    | 0.837  | 0.837  | 0.001  | 0.107  | 0.602  |    | 0.836  | 0.539  | 0.984  |
| A012893_01 |    | 1.512  | 1.42   | -1.208 | -1.156 | 0.363  |    | 0.222  | 1.493  | 1.469  |
| A012895_01 |    | -0.939 | -0.625 | 0.457  | 0.351  | 0.224  |    | 0.24   | 0.224  | 0.149  |
| A012896_01 |    | -0.859 | -0.72  | -0.418 | -0.237 | -0.256 |    | -0.254 | -0.292 | -0.258 |
| A012897_01 |    | 1.061  | 0.84   | 0.358  | 0.455  | 0.447  |    | 0.389  | -0.212 | 0.087  |
| A012899_01 |    | -0.376 | -0.75  | -0.357 | -0.286 | -0.571 |    | -0.569 | -0.667 | -0.57  |
| A012907_01 | NA | NA     |        | -0.168 | -0.102 | NA     |    | NA     | NA     | -0.593 |
| A012913_01 |    | -0.377 | -0.093 | 0.114  | 0.233  | -0.219 |    | -0.034 | -0.063 | 0.06   |
| A012917_01 | NA | NA     |        | -0.021 | 0.117  | -0.369 | NA |        | -0.002 | 0.178  |
| A012919_01 |    | -1.116 | -0.426 | 0.165  | 0.213  | 0.286  |    | 0.32   | 0.217  | 0.405  |
| A012921_01 |    | -0.149 | 0.297  | 0.381  | 0.249  | 0.675  |    | 0.211  | 0.282  | 0.148  |
| A012930_01 | NA |        | -0.231 | 0.474  | 0.097  | 0.339  |    | 0.155  | 0.323  | -0.119 |
| A012932_01 | NA | NA     |        | 0.238  | 0.042  | NA     |    | NA     | -0.123 | -0.08  |
| A012934_01 |    | 0.148  | 0.484  | 0.027  | 0.163  | 0.303  |    | 0.681  | 0.588  | 0.722  |
| A012936_01 |    | 0.83   | 0.326  | -0.151 | NA     | 0.225  |    | 0.176  | 0.304  | 0.233  |
| A012937_01 |    | -0.215 | -0.125 | 0.082  | -0.066 | 0.255  |    | 0.055  | 0.274  | 0.191  |

|            |    |           |        |           |           |           |        |          |        |
|------------|----|-----------|--------|-----------|-----------|-----------|--------|----------|--------|
| A012940_01 |    | 1.335     | 1.168  | -0.029    | 0.179     | 0.509     | 0.524  | 0.446    | 0.758  |
| A012944_01 | NA | NA        |        | -0.166    | -0.119    | 0.481     | 0.847  | 0.595    | 0.813  |
| A012946_01 | NA | NA        |        | 0.239     | 0.221 NA  | NA        |        | -0.025   | -0.057 |
| A012951_01 |    | -0.199    | 0.035  | 0.397     | 0.329     | 0.658     | 0.484  | 0.563    | 0.499  |
| A012958_01 |    | 0.09      | -0.046 | -0.086    | -0.158    | 0.019     | -0.048 | -0.263   | -0.181 |
| A012959_01 |    | -0.677    | -0.037 | 0.334     | 0.327     | 0.393     | 0.444  | 0.201    | 0.331  |
| A012960_01 |    | 0.762     | 0.52   | -0.31     | -0.157    | 0.023     | -0.193 | -0.252   | -0.063 |
| A012964_01 |    | 0.128     | 0.115  | -0.275    | -0.107    | 0.237     | 0.184  | 0.079    | 0.288  |
| A012966_01 |    | 1.276     | 1.167  | 0.171     | 0.24      | 0.872     | 0.671  | 0.594    | 0.788  |
| A012972_01 | NA | NA        |        | -0.532    | -0.434    | 0.692     | 0.455  | 0.253    | 0.23   |
| A012977_01 |    | 0.238     | 0.073  | -0.112    | 0.064     | -0.201    | -0.273 | -0.119   | -0.088 |
| A012978_01 |    | 0.893     | 0.714  | -0.707    | -0.547    | -0.971    | -0.907 | -0.814   | -0.619 |
| A012982_01 |    | -0.446    | -0.386 | -0.994 NA |           | -0.085    | 0.168  | -0.203   | 0.229  |
| A012986_01 |    | 0.804     | 0.643  | 0.706     | 0.364     | 1.033     | 0.841  | 0.937    | 0.778  |
| A012989_01 |    | -0.374    | -0.041 | 0.199     | 0.184     | 0.148     | 0.19   | 0.178    | 0.208  |
| A012995_01 | NA | NA        |        | 0.452     | 0.241 NA  | NA        |        | -0.116   | -0.313 |
| A013000_01 |    | -1.105    | -0.265 | 0.549     | 0.595     | 0.367     | 0.804  | 0.566    | 0.748  |
| A013003_01 | NA | NA        |        | -1.55 NA  | NA        | NA        | NA     | NA       | NA     |
| A013004_01 |    | 1.103     | 0.588  | -0.126    | 0.057     | 0.886     | 0.716  | 0.368    | 0.641  |
| A013011_01 |    | 0.7       | 0.414  | 0.006     | -0.137    | 0.425     | 0.409  | 0.396    | 0.303  |
| A013012_01 |    | 0.416     | 0.566  | -0.286    | -0.123    | 0.517     | 0.578  | 0.105    | 0.279  |
| A013018_01 |    | -0.302    | -0.067 | 0.181     | 0.222 NA  |           | -0.213 | -0.098   | -0.099 |
| A013019_01 |    | 0.032     | 0.091  | -0.178    | -0.174    | 0.186     | 0.349  | 0.235    | 0.19   |
| A013022_01 |    | 0.238     | 0.062  | -0.262    | -0.161    | 0.049     | -0.057 | -0.01    | -0.056 |
| A013026_01 |    | -0.352    | -0.006 | -0.137    | -0.124    | -0.223    | 0.02   | -0.267   | -0.304 |
| A013029_01 |    | 0.193     | 0.134  | -0.043    | 0.262     | -0.554    | -0.123 | -0.442   | 0.086  |
| A013032_01 |    | 0.141     | 0.13   | -0.172    | -0.145    | 0.266     | 0.42   | 0.539    | 0.678  |
| A013034_01 | NA | NA        |        | -0.405 NA | NA        | NA        | NA     |          | -0.847 |
| A013035_01 |    | 0.535     | 0.346  | 0.263     | 0.189     | 0.483     | 0.29   | 0.193    | 0.147  |
| A013036_01 |    | -0.602    | -0.601 | -0.345    | -0.035    | -1.327    | -1.073 | -0.525   | -0.592 |
| A013038_01 |    | 0.407 NA  |        | -0.314 NA |           | -0.168    | 0.18   | 0.243    | 0.599  |
| A013040_01 |    | -0.302    | 0.144  | 0.158     | 0.153     | 0.321     | 0.253  | 0.264    | 0.229  |
| A013044_01 |    | -0.561    | -0.237 | 0.335     | 0.31      | 0.268     | 0.091  | -0.139   | -0.257 |
| A013046_01 |    | 0.017     | 0.117  | -0.134    | -0.115    | -0.008    | 0.011  | 0.065    | -0.085 |
| A013047_01 | NA |           | -1.243 | -0.454    | -0.381    | -0.433    | -0.616 | -0.168   | -0.226 |
| A013050_01 |    | -0.293    | -0.114 | 0.22      | 0.312     | 0.406     | 0.398  | 0.111    | 0.12   |
| A013051_01 |    | 0.704     | 0.682  | -0.421    | -0.229    | 0.654     | 0.403  | 0.304    | 0.385  |
| A013053_01 |    | -0.057    | 0.177  | 0.039     | 0.15      | -0.13     | -0.013 | -0.092   | -0.008 |
| A013055_01 |    | 0.649     | 0.379  | -0.1 NA   |           | 0.279     | 0.35   | 0.327    | 0.357  |
| A013058_01 |    | -0.189    | -0.165 | -0.227    | -0.101    | -0.203    | 0.013  | -0.145   | -0.119 |
| A013062_01 | NA | NA        |        | 0.112 NA  |           | -0.454 NA | NA     |          | 0.347  |
| A013063_01 |    | 0.707     | 0.577  | 0.174     | 0.197     | 0.456     | 0.694  | 0.424    | 0.677  |
| A013065_01 |    | -0.941    | -0.45  | 0.08      | 0.015     | 0.11      | 0.254  | -0.03    | -0.09  |
| A013067_01 | NA | NA        |        | -0.095    | -0.063 NA | NA        | NA     |          | 0.002  |
| A013073_01 |    | -1.135    | -0.909 | 0.081     | 0.161     | -0.278    | -0.35  | -0.112   | -0.03  |
| A013074_01 |    | -1.34 NA  |        | 0.547     | 0.315     | -0.424 NA |        | 0.201    | 0.103  |
| A013075_01 | NA | NA        |        | 0.257     | 0.3 NA    | NA        |        | 0.057 NA |        |
| A013086_01 |    | -0.035    | 0.007  | 0.26      | 0.178     | 0.085     | 0.071  | 0.032    | -0.198 |
| A013087_01 | NA |           | -1.021 | -0.22     | -0.093    | -1.143    | -0.823 | -0.579   | -0.411 |
| A013088_01 |    | -0.376 NA |        | 0.307     | 0.255     | 0.089     | 0.021  | 0.105    | -0.08  |
| A013090_01 |    | -0.871    | -0.269 | 0.765     | 0.488     | -0.131    | -0.172 | -0.215   | -0.471 |
| A013093_01 |    | 0.514     | 0.193  | -0.173    | -0.207    | -0.103    | -0.246 | -0.151   | -0.109 |
| A013095_01 |    | -0.489    | -0.522 | -0.043    | 0.119     | -1.393    | -1.035 | -0.851   | -0.684 |
| A013098_01 |    | 0.186     | 0.364  | 0.2       | 0.336     | -0.698    | -0.488 | -0.503   | -0.518 |
| A013105_01 |    | 0.433 NA  |        | 0.515     | 0.228     | 0.362 NA  |        | 0.306    | 0.054  |
| A013107_01 |    | 0.159     | 0.309  | 0.26      | 0.085     | 0.048     | 0.123  | 0.311    | 0.312  |
| A013109_01 |    | 0.103     | 0.286  | 0.016     | 0.085     | -0.055    | 0.032  | 0.044    | -0.019 |
| A013111_01 |    | -0.114    | 0.023  | -0.09     | -0.063    | -0.035    | 0.219  | 0.207    | 0.254  |
| A013112_01 |    | -0.023    | 0.213  | 0.057     | 0.102     | 0.025     | 0.309  | 0.328    | 0.541  |
| A013118_01 |    | 0.052     | 0.044  | 0.393     | 0.329     | 0.021     | 0.003  | 0.011    | -0.175 |
| A013119_01 |    | -2.389    | -2.2   | -0.949    | -0.678    | -1.59     | -1.134 | -0.97    | -0.962 |
| A013129_01 |    | -1.841    | -1.368 | -0.079    | -0.095    | -0.559    | -0.466 | 0.046    | -0.022 |
| A013130_01 |    | 0.406 NA  |        | -0.082 NA | NA        | NA        |        | -0.004   | 0.02   |
| A013142_01 |    | 0.532     | 0.479  | 0.011     | 0.137     | 0.952     | 0.952  | 0.722    | 0.848  |
| A013143_01 |    | -1.102    | -0.874 | 0.181     | 0.138     | -0.413    | -0.341 | -0.144   | -0.117 |
| A013154_01 |    | -0.194    | -0.524 | 0.105     | -0.049    | -0.209    | -0.302 | -0.079   | -0.318 |
| A013156_01 | NA |           | -0.51  | -0.258    | -0.309    | -0.247    | -0.661 | -0.34    | -0.517 |
| A013164_01 |    | -0.758    | -0.575 | -0.506    | -0.273    | -0.751    | -0.612 | -0.465   | -0.475 |

|            |    |        |        |        |        |        |    |        |        |        |
|------------|----|--------|--------|--------|--------|--------|----|--------|--------|--------|
| A013188_01 |    | -1.076 | -1.331 | -3.301 | -3.016 | -1.653 | NA |        | -2.429 | -2.376 |
| A013192_01 |    | -0.114 | -0.347 | -0.409 | -0.466 | 0.159  |    | 0.076  | 0.435  | 0.39   |
| A013196_01 |    | -0.039 | -0.126 | -0.157 | -0.113 | -0.439 |    | -0.359 | -0.395 | -0.168 |
| A013212_01 |    | 0.216  | 0.443  | 0.321  | 0.261  | 1.078  |    | 0.934  | 0.708  | 0.679  |
| A013215_01 | NA |        |        | -0.206 | -0.098 | NA     |    | NA     | -0.386 | -0.372 |
| A013219_01 |    | 0.776  | 0.401  | 0.094  | 0.076  | 0.108  |    | 0.071  | -0.016 | 0.233  |
| A013223_01 |    | -0.2   | -0.591 | 0.142  | 0.095  | 0.079  |    | -0.009 | -0.177 | -0.05  |
| A013227_01 |    | 0.557  | 0.265  | 0.154  | 0.209  | 0.086  |    | -0.075 | -0.054 | 0.014  |
| A013238_01 |    | 1.362  | 1.405  | -1.906 | -1.398 | 0.112  |    | -0.1   | 1.53   | 1.407  |
| A013240_01 |    | -0.331 | -0.107 | -0.027 | 0.276  | 0.102  |    | 0.329  | -0.221 | 0.064  |
| A013244_01 |    | 0.507  | 0.251  | 0.009  | -0.031 | 0.006  |    | -0.045 | -0.013 | 0.018  |
| A013246_01 |    | -0.25  | -1.179 | -0.913 | NA     | -0.696 |    | -1.296 | -0.568 | NA     |
| A013249_01 |    | 0.49   | 0.366  | 0.344  |        | 0.386  |    | 0.275  | 0.323  | 0.231  |
| A013260_01 |    | 0.224  | 0.417  | 0.136  | 0.283  | 0.733  |    | 0.387  | 0.054  | 0.122  |
| A013266_01 |    | -0.242 | 0.115  | 0.109  | 0.167  | 0.202  |    | 0.168  | 0.179  | 0.166  |
| A013268_01 |    | 0.452  | 0.337  | -0.136 | -0.02  | 0.243  |    | 0.246  | 0.075  | 0.152  |
| A013270_01 |    | -0.512 | -0.398 | 0.288  | 0.261  | 0.452  |    | 0.21   | 0.213  | 0.212  |
| A013277_01 |    | -0.393 | -0.194 | 0.365  | 0.33   | -0.231 |    | -0.066 | -0.119 | -0.081 |
| A013278_01 |    | 0.399  | 0.126  | 0.205  | 0.284  | 0.58   | NA |        | 0.166  | 0.358  |
| A013281_01 | NA |        |        | 0.16   | 0.035  | NA     |    | NA     | -0.344 | -0.244 |
| A013282_01 |    | -1.327 | -0.52  | 0.01   | -0.026 | -0.138 |    | -0.372 | -0.093 | -0.238 |
| A013287_01 |    | -0.575 | -0.159 | 0.48   | 0.425  | -0.259 |    | -0.267 | -0.026 | 0.018  |
| A013299_01 |    | -0.749 | -0.617 | -0.868 | -0.662 | -0.448 |    | -0.541 | -0.34  | -0.412 |
| A013356_01 |    | 0.711  | 0.492  | -0.327 | -0.206 | 0.143  |    | 0.141  | 0.07   | 0.218  |
| A013397_01 |    | -0.475 | -0.2   | -0.859 | -0.54  | -0.81  |    | -0.383 | 0.037  | 0.265  |
| A013402_01 | NA |        |        | 0.321  | 0.247  | NA     |    | NA     | 0.035  | -0.178 |
| A013406_01 | NA |        |        | 0.144  | 0.068  | NA     |    | NA     | NA     | NA     |
| A013408_01 |    | 0.371  | 0.285  | 0.178  | 0.151  | 0.553  |    | 0.436  | 0.168  | 0.357  |
| A013412_01 |    | -0.287 | -0.517 | -0.092 | 0.023  | -0.471 |    | -0.63  | -0.37  | -0.621 |
| A013413_01 | NA |        |        | 0.441  | 0.159  | 0.738  |    | 0.352  | 0.384  | 0.314  |
| A013414_01 |    | -0.325 | -0.512 | 0.12   | 0.032  | -0.208 |    | -0.354 | -0.398 | -0.436 |
| A013416_01 |    | -0.752 | -0.759 | -0.676 | -0.591 | -0.755 |    | -0.608 | -0.29  | -0.457 |
| A013417_01 |    | -2.818 | -2.71  | -0.421 | -0.177 | -2.412 |    | -1.64  | -1.095 | -1.115 |
| A013419_01 |    | -0.605 | -0.507 | -0.121 | -0.08  | -0.445 |    | -0.262 | -0.246 | -0.236 |
| A013420_01 | NA |        |        | 0.38   | 0.232  | 0.804  |    | 0.671  | 0.659  | 0.688  |
| A013421_01 |    | -0.333 | -0.262 | 0.302  | 0.329  | -0.079 |    | -0.099 | -0.079 | 0.078  |
| A013423_01 |    | 0.774  | 0.43   | 0.19   | 0.086  | 0.434  |    | 0.226  | 0.195  | 0.129  |
| A013428_01 |    | -0.357 | -0.016 | 0.048  | 0.002  | 0.41   |    | 0.095  | 0.48   | 0.424  |
| A013429_01 | NA |        |        | -0.137 | -0.102 | -0.652 |    | -0.708 | -0.767 | -0.858 |
| A013435_01 |    | 0.018  | 0.136  | -0.3   | -0.249 | 0.587  |    | 0.521  | 0.291  | 0.209  |
| A013440_01 | NA |        |        | 0.089  | -0.04  | NA     |    | -0.066 | -0.115 | -0.394 |
| A013447_01 |    | 1.066  | 0.744  | 0.277  | 0.034  | 0.856  |    | 0.477  | 0.458  | 0.367  |
| A013461_01 |    | 1.015  | 0.516  | 0.055  | -0.067 | 0.434  |    | 0.28   | 0.28   | 0.417  |
| A013462_01 | NA |        |        | 0.276  | 0.251  | NA     |    | NA     | 0.129  | 0.213  |
| A013463_01 |    | 0.581  | 0.358  | 0.24   | 0.209  | 0.427  |    | 0.446  | 0.308  | 0.362  |
| A013467_01 |    | 0.665  | 0.476  | -0.087 | -0.097 | 0.891  |    | 0.61   | 0.585  | 0.547  |
| A013468_01 | NA |        |        | 0.424  | 0.401  | 0.545  |    | 0.678  | 0.191  | 0.325  |
| A013469_01 |    | 0.187  | 0.029  | -0.121 | -0.013 | 0.12   |    | 0.085  | 0.299  | 0.344  |
| A013470_01 |    | 0.604  | 0.505  | 0.545  | 0.489  | 0.514  |    | 0.609  | 0.459  | 0.459  |
| A013475_01 |    | 0.596  | 0.176  | -0.098 | -0.342 | 0.677  |    | 0.308  | 0.382  | 0.057  |
| A013477_01 | NA |        |        | 0.106  | 0.103  | NA     |    | NA     | NA     | -0.418 |
| A013479_01 |    | -0.098 | NA     | -0.006 | 0.065  | 0.225  | NA |        | 0.105  | 0.201  |
| A013487_01 |    | -0.227 | NA     | 0.297  | 0.238  | 0.448  |    | 0.584  | 0.28   | 0.475  |
| A013488_01 |    | -0.986 | NA     | -0.392 | -0.458 | -0.868 |    | -0.961 | -0.419 | -0.767 |
| A013490_01 |    | -0.193 | -0.185 | -0.194 | -0.335 | 0.451  |    | 0.064  | 0.533  | 0.219  |
| A013498_01 | NA |        |        | 0.315  | 0.154  | NA     |    | -0.033 | -0.106 | -0.259 |
| A013503_01 |    | 0.459  | 0.284  | -0.021 | 0.081  | 0.279  |    | 0.269  | 0.051  | 0.086  |
| A013510_01 |    | -0.05  | 0.053  | 0.237  | 0.205  | 0.726  |    | 0.528  | 0.753  | 0.627  |
| A013518_01 |    | -0.915 | -0.321 | -0.569 | -0.447 | -0.428 |    | -0.381 | -0.462 | -0.569 |
| A013519_01 |    | 0.008  | 0.041  | -1.777 | -1.412 | -0.747 |    | -0.596 | -0.468 | 0.071  |
| A013520_01 | NA |        |        | 0.055  | 0.081  | NA     |    | NA     | 0.046  | -0.074 |
| A013522_01 |    | -0.173 | -0.233 | -0.001 | 0.13   | -0.62  |    | -0.504 | -0.351 | -0.207 |
| A013534_01 |    | 0.237  | 0.086  | 0.113  | 0.14   | 0.21   |    | 0.161  | 0.049  | 0.059  |
| A013535_01 |    | 0.631  | 1.165  | -0.373 | -0.121 | 0.938  |    | 1.414  | 0.691  | 1.229  |
| A013537_01 |    | -1.115 | -0.477 | -0.005 | 0.074  | -0.734 |    | -0.224 | -0.567 | -0.677 |
| A013547_01 |    | 0.011  | -0.125 | 0.312  | 0.142  | -0.394 |    | -0.576 | -0.128 | -0.479 |
| A013548_01 | NA |        |        | -0.278 | NA     | NA     |    | NA     | NA     | -0.22  |
| A013554_01 |    | -1.693 | -1.771 | -3.205 | -2.645 | -1.82  |    | -1.636 | -1.632 | -1.696 |

|            |    |        |        |        |        |        |    |        |        |        |
|------------|----|--------|--------|--------|--------|--------|----|--------|--------|--------|
| A013555_01 | NA | NA     | NA     | NA     |        | -1.7   | NA |        | -1.299 | -1.579 |
| A013559_01 |    | 0.365  | 0.585  | 0.745  | 0.403  | 1.186  |    | 0.638  | 0.332  | 0.199  |
| A013560_01 |    | -0.096 | 0.225  | 0.352  | 0.24   | 0.276  |    | 0.231  | 0.199  | 0.195  |
| A013561_01 |    | -0.714 | NA     | -0.798 | NA     | -1.103 | NA | NA     | NA     |        |
| A013562_01 | NA | NA     |        | 0.124  | NA     |        | NA |        | -0.643 | NA     |
| A013564_01 |    | 0.505  | -0.056 | -0.469 | -0.614 | -0.043 |    | -0.332 | -0.177 | -0.391 |
| A013571_01 |    | 0.641  | 0.385  | 0.098  | -0.076 | 0.356  |    | 0.105  | 0.362  | -0.032 |
| A013572_01 |    | 0.13   | -0.057 | -0.465 | -0.39  | -0.016 |    | -0.024 | -0.093 | -0.174 |
| A013574_01 |    | 0.011  | 0.233  | -0.015 | 0.051  | 0.045  |    | 0.063  | 0.084  | 0.073  |
| A013577_01 |    | 0.263  | 0.245  | -0.004 | 0.077  | 0.024  |    | 0.077  | -0.172 | 0.001  |
| A013579_01 |    | -0.382 | -0.262 | 0.14   | 0.202  | -0.07  |    | -0.129 | -0.022 | -0.138 |
| A013586_01 |    | 0.815  | NA     | 0.332  | 0.356  | 0.655  |    | 0.548  | 0.312  | 0.37   |
| A013590_01 |    | 0.37   | 0.007  | 0.082  | NA     | 0.084  |    | -0.178 | NA     | NA     |
| A013591_01 |    | 0.449  | 0.096  | 0.25   | -0.065 | 0.066  |    | -0.391 | 0.019  | NA     |
| A013604_01 |    | 0.799  | 0.544  | 0.314  | -0.022 | 0.528  |    | 0.32   | 0.365  | 0.55   |
| A013605_01 |    | 0.699  | 0.61   | 0.072  | 0.124  | 0.348  |    | 0.312  | 0.207  | 0.202  |
| A013606_01 |    | -0.629 | -0.581 | -0.534 | -0.34  | -1.283 |    | -1.171 | -0.676 | -0.631 |
| A013614_01 |    | -0.114 | -0.323 | -0.772 | -0.875 | -0.151 |    | -0.507 | -0.304 | -0.492 |
| A013616_01 |    | -0.518 | -0.438 | 0.336  | 0.258  | -0.049 |    | -0.033 | 0.151  | 0.061  |
| A013617_01 |    | -0.512 | NA     | 0.096  | 0.097  | -0.53  |    | -0.828 | -0.648 | -0.63  |
| A013618_01 |    | 0.072  | -0.666 | -0.559 | -0.776 | -0.805 |    | -1.406 | NA     | NA     |
| A013619_01 |    | -0.3   | 0.001  | 0.334  | 0.297  | 0.363  |    | 0.116  | -0.017 | -0.079 |
| A013622_01 |    | -0.609 | -0.293 | 0.109  | 0.136  | -0.309 |    | -0.301 | -0.015 | -0.169 |
| A013625_01 |    | -0.454 | -0.572 | -0.514 | -0.595 | -0.45  |    | -0.643 | -0.365 | -0.634 |
| A013627_01 |    | 0.359  | 0.407  | 0.312  | 0.276  | 0.79   |    | 0.701  | 0.826  | 0.984  |
| A013628_01 |    | 0.137  | 0.061  | 0      | -0.002 | 0.154  |    | 0.05   | 0.035  | -0.014 |
| A013632_01 |    | 0.034  | 0.187  | 0.089  | NA     | 0.508  |    | 0.361  | 0.598  | 0.452  |
| A013633_01 |    | 0.297  | -0.185 | -0.571 | -0.536 | -0.579 |    | -1.01  | -0.588 | -0.72  |
| A013634_01 |    | 0.287  | 0.18   | 0.41   | 0.258  | 0.497  |    | 0.367  | 0.354  | 0.294  |
| A013637_01 | NA | NA     | NA     |        | -0.43  | NA     |    | -0.528 | NA     | NA     |
| A013640_01 |    | -0.495 | NA     | 0.151  | 0.285  | -0.25  |    | -0.299 | -0.389 | -0.235 |
| A013643_01 |    | -0.663 | -0.755 | 0.576  | 0.384  | -0.168 |    | -0.291 | -0.122 | -0.274 |
| A013644_01 |    | -0.985 | -0.441 | 0.071  | 0.079  | 0.125  |    | 0.147  | -0.213 | -0.02  |
| A013646_01 |    | -0.616 | -0.274 | -0.337 | -0.258 | -0.176 |    | -0.066 | -0.435 | -0.309 |
| A013647_01 |    | -0.575 | NA     | -0.31  | -0.339 | 0.117  |    | 0.056  | 0.526  | 0.435  |
| A013651_01 | NA | NA     |        | 0.095  | 0.015  | NA     |    | NA     | NA     | 0.058  |
| A013657_01 |    | 0.762  | 0.692  | 0.582  | 0.394  | 0.875  |    | 0.829  | 0.723  | 0.484  |
| A013658_01 |    | -1.027 | -0.966 | 0.086  | 0.069  | -0.496 |    | -0.74  | -0.448 | -0.571 |
| A013659_01 |    | -0.856 | -0.957 | 0.05   | 0.016  | -0.453 |    | -0.595 | -0.372 | -0.63  |
| A013660_01 |    | -0.854 | -0.986 | 0.312  | 0.017  | 0.019  |    | -0.004 | 0.114  | -0.046 |
| A013661_01 |    | -0.43  | -0.086 | -0.297 | -0.114 | -0.371 |    | 0.16   | 0.334  | 0.389  |
| A013662_01 |    | -0.231 | -0.498 | -0.125 | -0.294 | 0.159  |    | 0.014  | 0.493  | 0.319  |
| A013663_01 | NA | NA     |        | 0.631  | 0.344  | 0.814  |    | 0.578  | 0.615  | 0.209  |
| A013664_01 |    | -0.003 | 0.153  | 0.168  | 0.051  | 0.585  |    | 0.375  | 0.772  | 0.489  |
| A013667_01 | NA | NA     |        | -0.775 | -0.768 | NA     |    | NA     | NA     | NA     |
| A013668_01 |    | 0.588  | 0.544  | 0.159  | 0.185  | -0.041 |    | 0.2    | 0.105  | 0.32   |
| A013669_01 |    | -0.993 | -0.67  | -0.573 | -0.436 | -0.953 |    | -0.834 | -0.856 | -0.67  |
| A013671_01 | NA | NA     |        | 0.554  | 0.272  | NA     |    | NA     | 0.338  | 0.083  |
| A013674_01 |    | -0.222 | -0.246 | 0.248  | 0.15   | -0.251 |    | NA     | -0.149 | -0.351 |
| A013675_01 | NA | NA     |        | 0.116  | 0.022  | NA     |    | NA     | -0.214 | -0.264 |
| A013676_01 |    | -1.357 | -1.217 | -1.228 | -1.096 | -1.855 |    | -1.571 | -1.872 | -1.964 |
| A013680_01 |    | -0.429 | 0.104  | 0.255  | 0.251  | -0.177 |    | -0.08  | 0.094  | -0.026 |
| A013681_01 |    | 0.334  | 0.384  | -0.308 | -0.144 | -0.292 |    | -0.186 | -0.256 | -0.125 |
| A013682_01 | NA | NA     |        | 0.81   | 0.641  | NA     |    | NA     | 0.199  | 0.164  |
| A013684_01 |    | 0.449  | NA     | -0.078 | NA     | NA     |    | NA     | NA     | NA     |
| A013685_01 |    | -0.013 | NA     |        | NA     | -0.115 |    | NA     | NA     | NA     |
| A013689_01 |    | -0.39  | -0.155 | 0.217  | 0.011  | -0.034 |    | -0.029 | 0.163  | 0.1    |
| A013691_01 |    | -1.317 | NA     | -2.577 | -2.113 | -1.221 |    | -1.306 | -1.49  | -1.457 |
| A013692_01 |    | -1.487 | -0.618 | -0.426 | -0.335 | -0.256 |    | -0.072 | 0.269  | 0.461  |
| A013695_01 |    | 0.314  | 0.29   | 0.311  | 0.309  | 0.438  |    | 0.451  | 0.108  | 0.185  |
| A013697_01 |    | -1.183 | -0.422 | 0.695  | 0.742  | 0.322  |    | 0.476  | 0.363  | 0.49   |
| A013699_01 |    | -1.37  | -1.096 | -0.167 | -0.023 | -1.33  |    | -0.951 | -0.685 | -0.632 |
| A013700_01 | NA | NA     |        | 0.382  | 0.131  | NA     |    | NA     | 0.424  | 0.243  |
| A013705_01 |    | 0.021  | 0.049  | -0.833 | -0.818 | -0.489 |    | -0.562 | -0.276 | -0.331 |
| A013707_01 |    | 0.103  | -0.012 | -0.298 | -0.555 | -0.017 |    | -0.333 | -0.09  | -0.447 |
| A013710_01 |    | -0.772 | -0.402 | 0.313  | 0.067  | 0.212  |    | 0.08   | 0.208  | 0.06   |
| A013711_01 |    | -0.876 | -1.479 | NA     | NA     | NA     |    | -1.654 | NA     | NA     |
| A013714_01 |    | -0.024 | -0.063 | 0.036  | -0.05  | -0.105 |    | 0.557  | 0.545  | 0.822  |

|            |           |           |           |           |           |           |        |        |
|------------|-----------|-----------|-----------|-----------|-----------|-----------|--------|--------|
| A013715_01 | -0.066    | 0.03      | 0.05      | 0.25      | 0.561     | 0.314     | 0.148  | 0.105  |
| A013717_01 | -0.293    | 0.132     | 0.658     | 0.418     | 0.113     | 0.657     | 0.629  | 0.69   |
| A013719_01 | 0.149     | 0.562     | 0.128     | 0.102     | 0.223     | 0.948     | 0.819  | 1.017  |
| A013720_01 | 0.525     | 0.281     | 0.489     | 0.211     | -0.054 NA |           | -0.158 | -0.28  |
| A013721_01 | -0.477 NA |           | 0.709     | 0.535     | 0.704     | 0.833     | 0.714  | 0.589  |
| A013723_01 | 0.052     | 0.218     | 0.329     | 0.216     | 0.818     | 0.588     | 0.423  | 0.387  |
| A013724_01 | 0.093     | 0.326     | 0.167     | 0.008     | -0.051    | 0.128     | 0.275  | 0.154  |
| A013727_01 | NA        | -0.468    | 0.26      | 0.297     | -0.342 NA |           | -0.314 | -0.143 |
| A013728_01 | -0.261    | 0.004     | 0.082     | 0.058     | 0.28      | 0.75      | -0.004 | 0.179  |
| A013731_01 | NA        | NA        | 0.165     | 0.112 NA  |           | 0.064 NA  |        | -0.01  |
| A013732_01 | -0.115    | 0.138     | -0.2      | -0.146    | 1.046     | 0.802     | 1.364  | 1.129  |
| A013733_01 | -1.07     | -1.091    | -0.811    | -0.78     | -0.499    | -0.825    | -0.601 | -0.657 |
| A013735_01 | 0.503     | 0.244     | -0.191    | -0.151    | 0.241     | 0.16      | 0.381  | 0.449  |
| A013736_01 | 0.391     | 0.491     | -0.11     | -0.098    | -0.875    | -0.11     | 0.015  | 0.106  |
| A013739_01 | 0.365     | 0.365     | 0.298     | 0.171     | 0.532 NA  | NA        |        | 0.133  |
| A013744_01 | 0.031     | 0.744     | -0.028    | 0.119     | 0.031     | 0.743     | 0.511  | 0.822  |
| A013746_01 | NA        | NA        | 0.271     | 0.054     | 0.17 NA   |           | -0.001 | -0.267 |
| A013747_01 | -0.243    | -0.172    | -0.765 NA |           | -0.511    | -0.497    | -0.19  | -0.111 |
| A013749_01 | 0.519     | 0.063     | 0.025     | -0.058    | -0.258    | -0.462    | -0.503 | -0.498 |
| A013751_01 | 0.461     | 0.528     | 0.441     | 0.278     | 0.223 NA  |           | 0.014  | -0.045 |
| A013755_01 | -0.483    | -0.293    | -0.017    | -0.007    | -0.742    | -0.464    | -0.298 | -0.33  |
| A013756_01 | -0.087 NA |           | 0.239     | 0.225     | -0.025 NA | NA        |        | 0.099  |
| A013758_01 | 0.071     | 0.316     | 0.204     | 0.136     | 0.021     | 0.408     | 0.281  | 0.275  |
| A013764_01 | -0.23     | -0.05     | -0.194    | -0.011    | -0.754    | -0.312    | -0.226 | 0.122  |
| A013765_01 | 0.044     | -0.204    | 0.134     | 0.131     | 0.056     | 0.027     | -0.149 | -0.1   |
| A013770_01 | 0.015     | 0.316     | -0.509    | -0.286    | 0.394     | 0.479     | 0.263  | 0.48   |
| A013773_01 | -0.898    | -0.428    | 0.367     | 0.278     | -0.138    | 0.156     | 0.268  | 0.189  |
| A013774_01 | -0.429    | -0.626    | -1.025    | -0.912    | -0.917    | -1.06     | -0.56  | -0.617 |
| A013775_01 | NA        | NA        | -0.323    | -0.121 NA | NA        |           | -0.869 | -0.764 |
| A013778_01 | 0.846     | 0.495     | -0.001    | -0.048    | 0.125     | 0.158     | 0.269  | 0.372  |
| A013780_01 | -0.133    | 0.043     | 0.837     | 0.715     | 0.455     | 0.586     | 0.418  | 0.329  |
| A013782_01 | 0.345     | -0.032    | 0.251     | 0.075     | 0.427     | 0.243     | 0.28   | 0.103  |
| A013785_01 | NA        | -0.341    | 0.234     | 0.008     | 0.059     | -0.347    | -0.26  | -0.23  |
| A013787_01 | -0.609    | -0.194    | 0.037     | 0.018     | -0.108    | 0.036     | -0.008 | 0.075  |
| A013795_01 | NA        | NA        | 0.444     | 0.259     | 0.559     | 0.365     | 0.529  | 0.33   |
| A013796_01 | 0.193     | 0.417     | 0.238     | 0.107     | 0.539     | 0.565     | 0.324  | 0.25   |
| A013799_01 | 0.662     | 0.691     | 0.488     | 0.332     | 0.297     | 0.506     | 0.068  | 0.159  |
| A013801_01 | 0.286     | 0.287     | -0.119    | -0.164    | 0.504     | 0.466     | 0.426  | 0.396  |
| A013805_01 | -0.056    | -0.107    | 0.386     | 0.224     | 0.715     | 0.62      | 0.316  | 0.33   |
| A013806_01 | -0.288    | -0.146    | -0.011    | -0.094    | -0.167    | -0.25     | -0.114 | -0.146 |
| A013807_01 | 0.194     | 0.023     | -0.164    | -0.231    | -0.065    | -0.2      | -0.147 | -0.099 |
| A013810_01 | NA        | -0.075    | -0.039    | -0.137 NA | NA        | NA        |        | -0.111 |
| A013829_01 | NA        | 0.076     | 0.186     | 0.052 NA  |           | 0.151     | 0.088  | 0.09   |
| A013831_01 | -0.129    | -0.568 NA | NA        |           | -0.457    | -0.66 NA  |        | -1.39  |
| A013832_01 | -1.558    | -1.028    | 0.033     | 0.051     | -0.826    | -0.838    | -0.148 | -0.211 |
| A013833_01 | 0.418     | 0.381     | 0.468     | 0.524     | 0.384     | 0.436     | 0.1    | 0.246  |
| A013835_01 | -0.329    | -0.396    | 0.6       | 0.393     | -0.59     | -0.425    | -0.135 | -0.251 |
| A013847_01 | NA        | NA        | 0.312     | 0.166 NA  | NA        |           | -0.094 | -0.219 |
| A013856_01 | -0.934    | -1.38 NA  | NA        |           | -1.617    | -1.569 NA | NA     |        |
| A013857_01 | -0.306    | -0.264    | 0.149     | 0.068     | -0.113    | -0.065    | 0.046  | -0.087 |
| A013863_01 | -0.043    | -0.117    | 0.035     | -0.087    | -0.448    | -0.466    | -0.348 | -0.518 |
| A013872_01 | -1.342    | -1.619    | -1.716    | -1.41     | -1.223    | -1.087    | -0.866 | -1.39  |
| A013875_01 | 0.213     | 0.138     | 0.276     | 0.19      | 0.854     | 0.685     | 0.826  | 0.843  |
| A013876_01 | 0.36      | 0.15      | -0.056    | 0.18      | -0.177    | 0.009     | -0.304 | -0.082 |
| A013879_01 | 0.25      | 0.146     | 0.287     | 0.294     | 0.243     | 0.339     | -0.128 | 0.089  |
| A013880_01 | -1.597    | -1.587    | 0.557     | 0.327     | -0.447    | -0.419    | 0.139  | 0.077  |
| A013884_01 | -0.377    | -0.26     | 0.028     | -0.036    | 0.026     | -0.028    | -0.054 | -0.151 |
| A013887_01 | NA        | NA        | 0.042     | 0.024 NA  | NA        |           | 0.087  | 0.065  |
| A013889_01 | -0.798    | -0.628    | 0.324     | 0.125     | 0.384     | 0.123     | 0.426  | 0.216  |
| A013896_01 | NA        | NA        | 0.335     | -0.13     | 0.523     | 0.316     | 0.483  | 0.371  |
| A013898_01 | -0.492    | 0.246     | -0.31     | -0.205    | 0.228     | 0.322     | 0.328  | 0.494  |
| A013901_01 | NA        | NA        | 0.124     | 0.044 NA  | NA        |           | 0.038  | -0.072 |
| A013903_01 | -1.405    | -1.613    | -1.262    | -0.953    | -1.194    | -1.288    | -1.097 | -1.105 |
| A013904_01 | 0.484     | 0.452     | -0.256    | -0.202    | -0.112 NA |           | -0.294 | -0.347 |
| A013911_01 | -0.851 NA | NA        | NA        | NA        | NA        | NA        | NA     |        |
| A013912_01 | -0.622    | -0.409    | 0.124     | 0.016     | -0.244    | -0.2      | -0.141 | -0.248 |
| A013914_01 | 0.487     | 0.277     | 0.092     | -0.034    | 0.36      | 0.31      | 0.301  | 0.248  |
| A013931_01 | -0.645    | -0.455    | -0.057    | -0.145    | -0.161    | -0.228    | -0.295 | -0.32  |

|            |        |        |        |        |        |        |        |        |
|------------|--------|--------|--------|--------|--------|--------|--------|--------|
| A013932_01 | -0.835 | -0.215 | 0.163  | 0.088  | 0.168  | 0      | 0.116  | -0.041 |
| A013942_01 | -0.879 | -1.078 | -0.103 | -0.057 | -0.467 | -0.46  | -0.656 | -0.78  |
| A013944_01 | -0.856 | -0.339 | 0.026  | 0.02   | 0.121  | 0.29   | 0.12   | 0.119  |
| A013945_01 | 0.147  | 0.27   | 0.393  | 0.072  | 0.313  | 0.143  | 0.197  | -0.128 |
| A013948_01 | 0.388  | 0.3    | 0.005  | 0.016  | -0.034 | 0.139  | -0.004 | 0.212  |
| A013950_01 | -0.838 | -0.69  | 0.227  | 0.191  | -0.046 | -0.124 | -0.135 | -0.08  |
| A013951_01 | 0.016  | 0.127  | 0.131  | 0.085  | 0.301  | 0.337  | 0.252  | 0.148  |
| A013956_01 | -0.084 | -0.022 | -0.159 | -0.078 | 0.541  | 0.411  | 0.37   | 0.329  |
| A013960_01 | -0.232 | 0.269  | 0.038  | 0.004  | 0.03   | 0.338  | 0.279  | 0.129  |
| A013971_01 | -1.013 | -0.309 | -0.162 | -0.113 | -0.029 | 0.227  | 0.509  | 0.527  |
| A013973_01 | -0.294 | -0.315 | -0.287 | -0.346 | -0.348 | -0.334 | -0.181 | -0.54  |
| A013974_01 | -1.012 | -0.851 | 0.027  | 0.101  | -0.215 | -0.226 | -0.19  | -0.115 |
| A013975_01 | -1.284 | -0.816 | -0.178 | -0.182 | -0.35  | -0.269 | -0.347 | -0.193 |
| A013980_01 | 0.49   | 0.322  | 0.467  | 0.323  | 0.353  | 0.082  | 0.379  | 0.189  |
| A013987_01 | -0.221 | -0.058 | 0.259  | 0.237  | 0.182  | 0.209  | 0.084  | 0.061  |
| A013989_01 | -1.085 | -1.222 | -0.79  | -0.63  | -1.091 | -0.964 | -0.939 | -0.908 |
| A013994_01 | 0.456  | 0.365  | 0.009  | -0.042 | 0.205  | 0.208  | 0.309  | 0.273  |
| A013995_01 | NA     | NA     | -0.199 | -0.136 | -0.86  | -0.838 | -0.715 | -0.824 |
| A013998_01 | -0.301 | -0.44  | -0.086 | -0.012 | -0.473 | -0.579 | -0.415 | -0.42  |
| A014000_01 | -1.326 | -0.836 | 0.087  | -0.103 | -0.14  | NA     | 0.269  | 0.244  |
| A014010_01 | -1.554 | -0.551 | -0.491 | -0.333 | -0.111 | 0.034  | 0.52   | 0.415  |
| A014014_01 | -0.757 | NA     | 0.351  | 0.349  | 0.306  | 0.276  | 0.197  | 0.097  |
| A014015_01 | NA     | NA     | 0.323  | 0.06   | NA     | NA     | 0.265  | 0.012  |
| A014016_01 | 0.979  | NA     | NA     | NA     | NA     | NA     | NA     | NA     |
| A014017_01 | 0.307  | 0.566  | 0.478  | 0.342  | 1.617  | 0.923  | 1.055  | 0.922  |
| A014019_01 | NA     | NA     | 0.34   | NA     | NA     | NA     | -0.163 | NA     |
| A014020_01 | -0.632 | -0.28  | 0.057  | 0.012  | -0.226 | -0.259 | -0.053 | -0.104 |
| A014021_01 | NA     | NA     | 0.683  | 0.508  | 1.54   | 1.242  | 0.92   | 0.947  |
| A014024_01 | -0.49  | -0.26  | -0.412 | -0.333 | -0.216 | -0.099 | -0.309 | -0.061 |
| A014025_01 | -1.07  | -0.47  | 0.056  | -0.094 | 0.177  | -0.107 | 0.157  | 0.049  |
| A014026_01 | -1.274 | -0.336 | 0.609  | 0.556  | -0.418 | -0.289 | -0.056 | -0.431 |
| A014027_01 | 0.799  | 0.428  | 0.256  | 0.001  | 0.379  | 0.268  | 0.057  | NA     |
| A014031_01 | 0.1    | 0.22   | 0.497  | 0.403  | 0.321  | 0.189  | 0.371  | 0.229  |
| A014036_01 | 0.364  | 0.219  | -0.021 | 0.017  | -0.087 | 0.035  | -0.221 | -0.049 |
| A014038_01 | -1.269 | -0.92  | 0.175  | 0.229  | -0.591 | -0.417 | -0.405 | -0.456 |
| A014040_01 | -2.093 | -2.373 | NA     | NA     | -3.173 | -2.794 | NA     | NA     |
| A014043_01 | NA     | -0.025 | -0.047 | -0.221 | NA     | NA     | -0.389 | -0.766 |
| A014046_01 | 0.007  | -0.054 | 0.681  | 0.435  | 0.748  | 0.356  | 0.282  | 0.167  |
| A014056_01 | 0.064  | 0.269  | 0.493  | 0.329  | 0.147  | 0.303  | 0.284  | 0.229  |
| A014062_01 | -0.027 | 0.07   | 0.076  | 0.045  | 0.015  | 0.036  | 0.003  | -0.075 |
| A014064_01 | 0.957  | 0.572  | 0.233  | -0.039 | 0.524  | 0.225  | NA     | 0.26   |
| A014066_01 | -0.1   | 0.206  | -0.03  | -0.049 | 0.128  | 0.302  | -0.348 | -0.279 |
| A014067_01 | 0.138  | 0.116  | 0.37   | 0.246  | 0.138  | -0.049 | 0.063  | -0.135 |
| A014068_01 | NA     | NA     | -1.347 | -1.158 | NA     | NA     | -1.14  | -1.841 |
| A014069_01 | 0.719  | -0.006 | -0.428 | -0.431 | 0.171  | 0.123  | -0.196 | -0.068 |
| A014072_01 | 0.126  | 0.428  | 0.084  | 0.1    | -0.129 | 0.349  | 0.194  | 0.318  |
| A014075_01 | -0.18  | -0.366 | -0.768 | -0.723 | -0.861 | -0.941 | -0.421 | -0.56  |
| A014083_01 | NA     | NA     | 0.314  | 0.323  | NA     | NA     | -0.275 | -0.112 |
| A014084_01 | -1.372 | -0.817 | 0.126  | 0.18   | -0.214 | 0.093  | 0.215  | 0.426  |
| A014085_01 | 0.217  | NA     | -0.066 | NA     | NA     | NA     | NA     | NA     |
| A014086_01 | -0.34  | NA     | -0.193 | -0.444 | -0.161 | -0.328 | -0.101 | -0.407 |
| A014088_01 | -0.199 | -0.075 | 0.172  | -0.02  | 0.021  | 0.064  | -0.086 | -0.102 |
| A014089_01 | NA     | -0.888 | 0.21   | 0.135  | -0.062 | NA     | 0.134  | -0.014 |
| A014095_01 | 0.212  | 0.143  | -0.244 | -0.363 | -0.258 | -0.276 | NA     | 0.054  |
| A014097_01 | -0.289 | -0.249 | 0.077  | 0.185  | 1.231  | 1.194  | 0.749  | 0.944  |
| A014098_01 | -0.35  | -0.221 | -0.033 | -0.06  | 0.016  | 0.024  | -0.09  | -0.199 |
| A014109_01 | -0.775 | -0.688 | 0.287  | 0.224  | -0.53  | -0.418 | -0.056 | -0.136 |
| A014112_01 | NA     | NA     | 0.037  | -0.261 | NA     | NA     | NA     | -0.034 |
| A014113_01 | -0.03  | 0.062  | 0.169  | -0.047 | 0.141  | -0.072 | -0.068 | -0.164 |
| A014115_01 | -1.347 | -1.797 | 0.222  | 0.054  | -1.283 | -0.965 | -0.873 | -1.182 |
| A014117_01 | NA     | NA     | 0.355  | 0.069  | NA     | NA     | 0.023  | -0.258 |
| A014119_01 | 0.065  | 0.243  | -0.095 | -0.198 | -0.087 | 0.094  | 0.114  | 0.003  |
| A014121_01 | -0.193 | 0.089  | -1.327 | -1.122 | -0.426 | -0.229 | -0.413 | -0.322 |
| A014124_01 | -0.288 | -0.119 | 0.624  | 0.411  | 0.326  | 0.204  | -0.062 | -0.195 |
| A014126_01 | 0.022  | 0.076  | 0.366  | 0.216  | 0.123  | 0.165  | -0.003 | -0.255 |
| A014130_01 | 0.745  | 0.451  | -0.249 | -0.2   | 0.956  | 0.657  | 0.681  | 0.732  |
| A014131_01 | 1.009  | 1.057  | -0.039 | 0.025  | 0.871  | 1.055  | 0.816  | 1.005  |
| A014132_01 | NA     | NA     | 0.596  | 0.262  | 0.556  | NA     | 0.167  | -0.009 |



|            |           |           |           |           |           |           |           |        |
|------------|-----------|-----------|-----------|-----------|-----------|-----------|-----------|--------|
| A014136_01 | -0.372    | -0.416    | 0.152     | 0.029     | -0.57     | -0.726    | -0.569    | -0.626 |
| A014137_01 | -0.413    | -0.201    | 0.584     | 0.338     | 0.123 NA  |           | 0.339     | 0.158  |
| A014139_01 | -0.658    | -0.681    | 0.021     | -0.006    | -0.502    | -0.715    | -0.511    | -0.605 |
| A014140_01 | 0.51 NA   |           | 0.519     | 0.278     | 0.181     | -0.083    | 0.073     | -0.22  |
| A014141_01 | 0.786 NA  |           | 0.1       | 0.045     | -0.028 NA |           | 0.062 NA  |        |
| A014144_01 | -0.613    | -0.436    | 0.198     | 0.139     | -0.145    | -0.207    | -0.075    | -0.191 |
| A014146_01 | 0.478     | 0.039     | -0.398    | -0.353    | -0.343    | -0.172    | -0.237    | -0.081 |
| A014147_01 | NA        | NA        | 0.385     | 0.159 NA  | NA        |           | -0.105    | -0.161 |
| A014155_01 | -0.551    | -0.673    | 0.025 NA  |           | 0.24      | 0.209     | 0.61      | 0.308  |
| A014161_01 | -0.864    | -0.558    | 0.245     | 0.128     | 0.095     | 0.125     | 0.175     | 0.059  |
| A014163_01 | NA        | NA        | 0.376     | 0.184 NA  | NA        | NA        | NA        |        |
| A014165_01 | -0.173    | 0.02      | -0.239    | -0.366    | 0.432     | 0.397     | 0.613     | 0.467  |
| A014167_01 | NA        | NA        | 0.334     | 0.243 NA  | NA        |           | 0.166 NA  |        |
| A014168_01 | 0.767     | 0.817     | 0.02      | 0.044     | 0.314     | 0.425     | 0.541     | 0.458  |
| A014169_01 | -0.654    | -0.72     | -0.841    | -0.703    | -1.096    | -0.998    | -0.419    | -0.327 |
| A014174_01 | NA        | NA        | 0.023     | -0.092    | 0.012 NA  |           | -0.293    | -0.389 |
| A014176_01 | 0.407     | 0.299     | 0.404     | 0.279     | 0.32      | 0.183     | 0.187     | 0.013  |
| A014177_01 | 0.237     | 0.174     | -0.271    | -0.24     | -0.028    | -0.043    | -0.022    | -0.158 |
| A014178_01 | NA        | NA        | 0.14      | 0.064     | -0.132 NA |           | -0.128    | -0.17  |
| A014179_01 | -0.95     | -0.516    | -0.19     | -0.06     | 0.062     | -0.243    | 0.405     | 0.244  |
| A014180_01 | NA        | NA        | 0.914     | 0.593     | 0.827     | 0.404     | 0.433     | 0.235  |
| A014182_01 | -0.759    | -0.586    | -0.569    | -0.592    | -0.339    | -0.312    | -0.459    | -0.619 |
| A014185_01 | 0.549     | 0.059     | -0.079    | -0.059    | -0.097    | -0.276    | -0.051    | -0.024 |
| A014186_01 | -1.225    | -0.965    | 0.148     | 0.101     | -0.549    | -0.473    | -0.402    | -0.566 |
| A014188_01 | 0.913     | 0.541     | 0.377     | 0.099     | 0.494     | 0.334 NA  | NA        |        |
| A014189_01 | 0.479     | 0.333     | 0.311     | 0.282     | 0.494     | 0.215     | -0.116    | -0.261 |
| A014192_01 | -0.573    | -0.522    | -0.032    | 0.03      | -0.205    | -0.34     | -0.173    | -0.146 |
| A014194_01 | 0.51      | 0.389     | 0.064     | -0.009    | 0.47      | 0.283     | 0.346     | 0.231  |
| A014201_01 | 0.096     | 0.181     | -0.112    | -0.008    | 0.335     | 0.482     | 0.212     | 0.273  |
| A014202_01 | 0.336     | 0.144     | 0.053     | -0.037    | -0.154    | -0.319    | -0.224    | -0.162 |
| A014203_01 | 0.197     | -0.097    | -0.911 NA |           | -0.38     | -0.669 NA | NA        |        |
| A014204_01 | -0.499    | -0.295    | 0.227     | 0.204     | -0.032    | -0.132    | -0.09     | -0.187 |
| A014205_01 | 0.169     | 0.131     | -0.337    | -0.335    | -0.637 NA |           | -0.588    | -0.688 |
| A014208_01 | 0.054     | -0.012    | 0.086     | -0.336    | -0.224    | -0.434 NA | NA        |        |
| A014209_01 | -0.499 NA |           | -0.288 NA |           | -0.196 NA |           | -0.304 NA |        |
| A014210_01 | 0.649     | 0.596     | -0.509 NA |           | 0.754     | 0.602     | 0.642     | 0.619  |
| A014213_01 | -0.813    | -0.822    | -0.886    | -0.526    | -1.283    | -0.793    | -0.73     | -0.42  |
| A014224_01 | 0.326     | 0.496     | -0.005    | 0.061     | 0.457     | 0.904     | 0.207     | 0.425  |
| A014229_01 | -1.803    | -1.15     | 0.462     | 0.433     | -0.336    | -0.299    | -0.249    | -0.273 |
| A014233_01 | 0.246     | 0.535     | -0.307    | -0.177    | 0.797     | 0.787     | 0.451     | 0.655  |
| A014239_01 | -0.271    | 0.064     | 0.044     | 0.073     | 0.022     | 0.018     | 0.106     | 0.151  |
| A014245_01 | -0.007    | 0.103     | -0.002    | -0.114    | 0.215     | -0.072    | 0.181     | 0.107  |
| A014247_01 | -0.566    | -1.239 NA | NA        |           | -1.216    | -1.454    | 0.155 NA  |        |
| A014248_01 | 0.525     | 0.106     | -0.195    | -0.229    | -0.01     | 0.001     | 0.031     | -0.286 |
| A014249_01 | 0.201     | 0.323     | 0.013     | 0.178     | -0.295    | 0.02      | -0.154    | 0.085  |
| A014250_01 | 0.137     | 0.14      | 0.105     | -0.061    | 0.533     | 0.349     | 0.553     | 0.314  |
| A014253_01 | -0.727    | -0.387    | 0.532     | 0.553     | -0.194    | -0.108    | -0.078    | -0.009 |
| A014256_01 | -2.417    | -1.633    | -0.434    | -0.286    | -1.214    | -1.04     | -0.773    | -0.809 |
| A014257_01 | 0.332     | 0.347     | 0.229     | -0.062    | 0.29      | 0.182     | 0.237 NA  |        |
| A014264_01 | -0.594    | -0.118    | -0.027    | -0.094    | 0.029     | -0.113    | 0.262     | -0.015 |
| A014270_01 | 0.628     | 0.379     | -0.238    | -0.29     | 0.46      | 0.174     | 0.361     | 0.413  |
| A014274_01 | 0.696     | 0.852     | 0.291     | 0.323     | 0.023     | 0.1       | 0.225     | 0.327  |
| A014275_01 | -2.398    | -3.351 NA | NA        |           | -3.403    | -3.019 NA | NA        |        |
| A014276_01 | -1.201    | -0.48     | 0.237     | 0.19      | 0.476     | 0.545     | 0.26      | 0.138  |
| A014278_01 | -0.827    | -1.019    | 0.024     | 0.057     | -0.149    | -0.213    | -0.257    | -0.236 |
| A014286_01 | -0.085    | -0.334    | -0.483    | -0.649    | -0.513    | -0.415    | -0.004    | 0.009  |
| A014293_01 | NA        | NA        | -0.192    | -0.265 NA | NA        |           | -0.027    | -0.407 |
| A014295_01 | NA        | NA        | 0.108     | 0.049     | 0.71      | 0.547     | 0.062     | 0.025  |
| A014304_01 | 0.243     | 0.732     | 0.274     | 0.183     | 0.223     | 0.19      | -0.338    | -0.413 |
| A014305_01 | -0.789    | -0.164    | 0.156     | 0.188     | -0.007    | 0.267     | 0.004     | 0.121  |
| A014307_01 | -0.292    | -0.513    | -0.105    | -0.15     | -0.159    | -0.287    | -0.05     | -0.323 |
| A014310_01 | -1.263    | -1.044    | -1.984    | -1.885    | -1.274    | -1.419    | -1.068    | -1.163 |
| A014313_01 | -0.512    | -0.227    | 0.314     | 0.279     | -0.158    | -0.098    | -0.049    | 0.021  |
| A014317_01 | -0.101    | -0.228    | -0.016    | -0.11     | -0.074    | -0.155    | 0.191     | 0.021  |
| A014319_01 | 0.389     | 0.519     | 0.013     | 0.013     | 0.338     | 0.45      | 0.149     | 0.272  |
| A014323_01 | 0.252     | 0.048     | -0.432 NA |           | 0.112     | 0.049     | 0.308     | 0.295  |
| A014325_01 | 0.843     | 0.453     | -0.161    | -0.446    | 0.34 NA   | NA        |           | 0.21   |
| A014331_01 | -0.356 NA |           | 0.24      | 0.078     | 0.258 NA  | NA        |           | -0.129 |

|            |    |           |           |           |           |           |          |           |        |
|------------|----|-----------|-----------|-----------|-----------|-----------|----------|-----------|--------|
| A014339_01 |    | 0.176     | -0.101    | -0.371    | -0.354    | -0.014    | -0.153   | -0.048    | 0.05   |
| A014344_01 |    | 0.253     | 0.309     | 0.225     | 0.22      | -0.074    | 0.11     | -0.068    | -0.031 |
| A014441_01 | NA | NA        |           | 0.495     | 0.324 NA  | NA        |          | -0.062    | -0.25  |
| A014442_01 |    | 0.64      | 0.152     | -0.515    | -0.33 NA  |           | 0.016    | -0.283    | -0.212 |
| A014443_01 |    | -0.548    | -0.261    | 0.135     | 0.129     | -0.088    | -0.17    | 0.085     | -0.096 |
| A014448_01 | NA | NA        |           | 0.198     | 0.137 NA  | NA        |          | 0.122     | 0.051  |
| A014449_01 |    | -0.349    | -0.031    | -0.104    | 0.007     | -0.267    | 0.31     | 0.24      | 0.279  |
| A014455_01 |    | -1.362    | -1.634    | -0.177    | -0.294    | -1.255    | -1.142   | -0.131    | -0.443 |
| A014457_01 | NA | NA        |           | 0.449     | 0.391     | 0.312 NA  |          | 0.042     | -0.015 |
| A014459_01 | NA | NA        |           | 0.132     | 0.118     | -0.446 NA |          | -0.061    | -0.218 |
| A014462_01 |    | -0.212    | -0.053    | 0.16      | -0.056    | 0.286     | 0.25     | 0.193     | 0.021  |
| A014463_01 |    | 0.167     | 0.181     | 0.131     | 0.129     | 0.606     | 0.637    | 0.308     | 0.428  |
| A014464_01 |    | -2.224    | -2.699    | -4.602    | -3.279    | -2.833    | -2.137   | -2.408    | -2.889 |
| A014468_01 |    | -0.118    | 0.213     | 0.223     | 0.101     | 0.309     | 0.251    | 0.479     | 0.471  |
| A014469_01 |    | 0.716     | 0.605     | -0.516    | -0.397    | 0.769     | 0.661    | 0.947     | 0.866  |
| A014472_01 | NA | NA        |           | 0.143     | 0.138     | 0.081     | -0.054   | -0.156    | -0.253 |
| A014473_01 |    | 0.321     | 0.297     | 0.184     | 0.192     | -0.058    | 0.086    | 0.182     | 0.234  |
| A014474_01 |    | 0.505     | 0.401     | -0.186    | -0.139    | 0.573     | 0.494    | 0.302     | 0.478  |
| A014486_01 |    | 0.368     | 0.062     | -0.23     | -0.329    | 0.116     | 0.008    | 0.082     | 0.199  |
| A014493_01 |    | -1.085    | 0.372     | -0.023    | -0.013    | -0.304    | 0.469    | 0.165     | 0.204  |
| A014495_01 |    | -0.571    | -0.433    | 0.021     | -0.009    | -0.426    | -0.461   | -0.064    | -0.355 |
| A014497_01 |    | 0.327     | 0.338     | -0.199    | -0.096    | 0.29      | 0.22     | 0.027     | 0.036  |
| A014501_01 |    | -0.197    | 0.192     | -0.189    | 0.034     | 0.539     | 0.445    | 0.016     | 0.282  |
| A014502_01 |    | 0.296     | 0.348     | 0.283     | 0.188     | 0.498     | 0.591    | 0.348     | 0.414  |
| A014503_01 | NA | NA        |           | 0.305     | 0.308 NA  | NA        |          | -0.4      | -0.409 |
| A014509_01 |    | -0.608    | -0.267 NA | NA        |           | 0.023     | 0.132 NA |           | 0.018  |
| A014510_01 |    | 0.295     | 0.306     | 0.136     | 0.297     | 0.187     | 0.457    | 0.385     | 0.71   |
| A014514_01 | NA | NA        |           | 0.116     | -0.075 NA |           | -0.161   | -0.103    | -0.416 |
| A014516_01 |    | -0.936    | -0.96     | 0.494     | 0.135     | -0.373    | -0.439   | -0.313    | -0.455 |
| A014519_01 |    | -0.597    | -0.442    | 0.084     | 0.002     | 0.312     | 0.382    | 0.414     | 0.22   |
| A014520_01 |    | 1.075     | 0.719 NA  | NA        |           | 0.832     | 0.947 NA |           | 0.67   |
| A014522_01 |    | -0.837    | -0.114    | 0.188     | 0.295     | 0.009     | 0.367    | 0.45      | 0.536  |
| A014526_01 |    | -2.25     | -2.328    | -0.487    | -0.414    | -1.446    | -0.749   | -0.44     | -0.717 |
| A014529_01 | NA | NA        |           | 0.258     | 0.074 NA  | NA        |          | -0.098    | -0.257 |
| A014531_01 |    | 0.071     | -0.166    | -0.556    | -0.245    | -0.45     | -0.282   | -0.347    | -0.167 |
| A014532_01 | NA | NA        |           | 0.213     | 0.228 NA  |           | 0.42     | 0.27      | 0.28   |
| A014537_01 |    | -0.508    | -0.412    | 0.193     | 0.182     | -0.21     | -0.282   | -0.226    | -0.339 |
| A014539_01 |    | 0.353     | 0.321     | 0.529     | 0.35      | 0.048     | -0.105   | 0.329     | 0.164  |
| A014543_01 |    | 0.787     | 0.495     | -0.069    | 0.053     | 0.191     | 0.044    | 0.115     | 0.244  |
| A014544_01 |    | 0.891     | 0.655     | 0.029     | 0.026     | 0.526     | 0.657    | 0.647     | 0.788  |
| A014548_01 |    | -0.416 NA |           | -0.131    | -0.24     | 0.302     | 0.107    | 0.293     | 0.179  |
| A014550_01 |    | 0.446     | 0.208     | -0.001    | -0.037    | 0.403     | 0.304    | 0.281     | 0.186  |
| A014556_01 |    | 0.701     | 0.264     | -0.185 NA | NA        | NA        | NA       | NA        | NA     |
| A014560_01 | NA | NA        |           | -0.543    | -0.751 NA | NA        | NA       | -0.243    | -0.52  |
| A014570_01 |    | -0.825    | -0.535    | -0.54     | -0.452    | -0.432    | -0.25    | 0.013     | 0.069  |
| A014571_01 |    | 0.843     | 0.952     | 0.276     | 0.231     | 0.366     | 0.451    | 0.198     | 0.337  |
| A014574_01 |    | -0.529    | -0.501    | 0.227     | 0.228     | -0.23     | -0.089   | 0.036     | 0.139  |
| A014576_01 |    | -0.964    | -0.455    | 0.002     | -0.022    | 0.068     | -0.091   | 0.018     | 0.036  |
| A014577_01 |    | -1.197    | -1.378    | -1.281    | -1.207    | -1.327    | -1.29    | -1.085    | -1.067 |
| A014580_01 |    | -0.257    | -0.245    | -0.058    | -0.096    | -0.19     | -0.124   | 0.082     | -0.098 |
| A014581_01 |    | 0.232     | 0.597     | -0.21     | 0.018     | 0.865     | 1.202    | 0.843     | 1.048  |
| A014587_01 |    | 0.538     | 0.535     | 0.038     | 0.192     | 0.29      | 0.61     | 0.234     | 0.496  |
| A014590_01 | NA |           | 0.192     | 0.248     | 0.306     | 0.306     | 0.389    | 0.319     | 0.208  |
| A014594_01 |    | 0.204     | 0.237     | -0.247    | -0.199    | -0.077    | 0.421    | 0.238     | 0.41   |
| A014596_01 |    | -1.054    | -0.626    | -0.09     | 0.02      | -0.749    | -0.516   | -0.185    | -0.227 |
| A014597_01 |    | -1.259    | -0.82     | 0.228     | 0.022     | -0.39     | -0.38    | -0.016    | -0.175 |
| A014600_01 | NA | NA        |           | -0.229    | -0.21     | -0.862    | -1.051   | -0.552 NA |        |
| A014601_01 |    | -0.853 NA |           | 0.782     | 0.63      | 0.278     | 0.193    | 0.162     | -0.076 |
| A014611_01 |    | 0.816     | 0.827     | -0.097    | -0.047    | 0.843     | 1.035    | 0.993     | 0.989  |
| A014612_01 |    | -0.007    | 0.368     | 0.055     | 0.11      | 0.308     | 0.532    | 0.282     | 0.271  |
| A014615_01 |    | -0.591    | -0.74     | -0.825    | -0.558    | -1.199    | -0.983   | -0.71     | -0.606 |
| A014621_01 |    | -0.608 NA | NA        | NA        |           | -0.61 NA  |          | 0.062 NA  |        |
| A014622_01 |    | 0.46      | 0.313     | 0.572     | 0.247     | 0.332     | 0.13     | 0.219     | -0.118 |
| A014628_01 |    | -0.382    | -0.22     | -0.192    | -0.193    | -0.054    | 0.055    | -0.028    | -0.127 |
| A014629_01 | NA | NA        |           | -0.227    | -0.272    | 0.314     | -0.09    | 0.559     | 0.329  |
| A014632_01 |    | -1.143    | -0.9      | -0.529    | -0.17     | -1.472    | -0.827   | -0.562    | -0.215 |
| A014633_01 |    | 0.63      | 0.092     | -0.423    | -0.277    | 0.108     | -0.275   | -0.107    | -0.182 |
| A014634_01 |    | -0.329    | -0.49     | -0.824    | -0.805    | -0.637    | -0.769   | -0.47     | -0.682 |

|            |           |        |           |           |           |        |          |        |
|------------|-----------|--------|-----------|-----------|-----------|--------|----------|--------|
| A014636_01 | -0.278    | -0.179 | -0.03     | -0.013    | 0.224     | 0.247  | 0.301    | 0.349  |
| A014637_01 | -0.927    | -0.689 | -0.125    | -0.16     | 0.243     | 0.122  | 0.131    | 0.062  |
| A014639_01 | 0.348     | -0.024 | 0.19      | -0.074    | 0.055     | 0.04   | -0.005   | -0.12  |
| A014643_01 | -0.686    | -0.93  | -0.705    | -0.672    | -0.562    | -0.383 | 0.281    | 0.181  |
| A014644_01 | -0.436    | -0.358 | 0.097     | -0.064    | -0.381    | -0.265 | -0.192   | -0.293 |
| A014646_01 | -0.558    | -0.051 | 0.489     | 0.394     | 0.274     | 0.358  | 0.043    | 0.025  |
| A014650_01 | -0.639    | -0.333 | 0.359     | 0.218     | -0.305    | -0.321 | -0.024   | -0.072 |
| A014654_01 | 0.41      | 0.315  | 0.249     | 0.082     | 0.316     | 0.338  | 0.341    | 0.249  |
| A014655_01 | -0.406    | -0.625 | -0.466    | -0.52     | -0.55     | -0.655 | -0.626   | -0.894 |
| A014660_01 | 1.03      | 0.555  | 0.18 NA   |           | 0.284     | 0.195  | 0.446 NA |        |
| A014661_01 | 0.853     | 0.717  | -0.628    | -0.508    | 0.464     | 0.277  | 0.206    | 0.004  |
| A014662_01 | 0.248     | 0.129  | 0.023     | -0.089    | -0.09     | -0.135 | -0.121   | -0.196 |
| A014667_01 | 0.739     | 0.563  | 0.246     | 0.222     | 0.487     | 0.591  | 0.259    | 0.429  |
| A014669_01 | -0.106    | 0.164  | -0.219    | -0.233    | -0.268    | -0.194 | -0.068   | 0.016  |
| A014675_01 | -0.745    | -0.687 | 0.115     | 0.082     | -0.448    | -0.561 | -0.346   | -0.49  |
| A014676_01 | -0.587    | -0.848 | 0.326     | 0.092     | -0.722    | -0.659 | 0.032    | -0.221 |
| A014677_01 | NA        | NA     | -0.025 NA |           | -0.689 NA | NA     | NA       |        |
| A014682_01 | -0.416    | 0.052  | 0.514     | 0.507     | 0.21      | 0.501  | 0.133    | 0.188  |
| A014684_01 | -0.581    | -0.826 | -0.458    | -0.552    | 0.114     | 0.13   | 0.632    | 0.491  |
| A014685_01 | NA        | NA     | 0.008     | 0.144 NA  | NA        |        | -0.405   | -0.541 |
| A014688_01 | -2.207    | -2.13  | -0.398    | -0.258    | -1.917    | -1.338 | -0.649   | -0.614 |
| A014699_01 | -0.691    | -0.73  | 0.188     | 0.064     | 0.089     | 0.165  | 0.346    | 0.208  |
| A014701_01 | -0.418    | 0.103  | 0.155     | 0.246     | -0.648 NA |        | -0.267   | -0.487 |
| A014702_01 | 0.347     | 0.566  | -0.161    | -0.078    | 0.78      | 0.821  | 0.301    | 0.287  |
| A014704_01 | -1.99     | -1.285 | -0.02     | 0.155     | -1.187    | -1.061 | -1.092   | -1.02  |
| A014705_01 | -0.428    | 0.415  | 0.656     | 0.478     | 1.152     | 1.126  | 0.69     | 0.824  |
| A014706_01 | -0.132    | -0.42  | -0.327    | -0.498    | -0.359    | -0.595 | -0.184   | -0.458 |
| A014707_01 | -0.432    | -0.402 | 0.121     | 0.135     | -0.619    | -0.566 | -0.248   | -0.312 |
| A014708_01 | 0.259     | 0.017  | 0.039     | -0.09     | 0.254     | -0.003 | 0.407    | 0.162  |
| A014709_01 | 0.723     | 0.423  | 0.292     | 0.228     | 0.077     | 0.086  | 0.534    | 0.329  |
| A014716_01 | -0.62     | -0.232 | -0.521    | -0.26     | -0.846    | -0.468 | -0.425   | -0.095 |
| A014717_01 | 0.638     | 0.356  | 0.025     | 0.053     | 0.297     | 0.415  | 0.25     | 0.303  |
| A014720_01 | 0.365     | 0.444  | -0.642    | -0.581    | 0.947     | 0.682  | 0.9      | 0.92   |
| A014721_01 | -0.673    | -0.517 | -0.47     | -0.421    | -0.777    | -0.709 | -0.533   | -0.744 |
| A014722_01 | -0.824    | -0.309 | 0.361     | 0.286     | -0.038    | -0.059 | -0.092   | -0.156 |
| A014723_01 | 0.229     | 0.288  | 0.302     | 0.023     | 0.255     | 0.218  | 0.165    | -0.195 |
| A014724_01 | 1.174     | 0.745  | -0.469 NA |           | 0.516     | 0.485  | 0.162    | 0.322  |
| A014725_01 | -1.191    | -0.762 | -0.151    | -0.186    | -1.014    | -0.625 | -0.065   | -0.316 |
| A014726_01 | 1.094     | -0.471 | -0.152 NA |           | 0.61      | 0.135  | 0.591    | 0.654  |
| A014728_01 | 0.388     | 0.071  | 0.191     | 0.001     | -0.186    | -0.176 | 0.014    | -0.074 |
| A014730_01 | 0.271     | 0.177  | 0.1       | -0.152    | 0.081     | -0.048 | 0.199    | -0.181 |
| A014732_01 | 0.564     | 0.038  | 0.026     | 0.023     | 0.039     | -0.4   | -0.126   | -0.293 |
| A014733_01 | -0.792    | -0.127 | 0.116     | 0.146     | 0.162     | 0.112  | -0.069   | -0.056 |
| A014738_01 | -0.608    | -0.158 | -0.324    | -0.266    | 0.006     | 0.076  | -0.085   | -0.016 |
| A014742_01 | -0.473    | -0.482 | 0.302     | 0.335     | -0.395    | -0.541 | -0.456   | -0.53  |
| A014743_01 | -1.791    | -0.944 | -0.143    | -0.117    | 0.009     | 0.187  | 0.308    | 0.432  |
| A014745_01 | -0.561    | -0.288 | 0.288     | 0.344     | 0.202     | 0.312  | 0.228    | 0.366  |
| A014746_01 | 0.77      | 0.847  | -0.33     | -0.245    | 0.315     | 0.798  | 0.475    | 0.905  |
| A014750_01 | -1.163    | -1.334 | -2.676    | -2.414    | -1.632    | -1.184 | -1.404   | -1.613 |
| A014751_01 | NA        | NA     | 0.176     | 0.112 NA  | NA        |        | -0.257   | -0.364 |
| A014752_01 | NA        | NA     | -0.044    | -0.125 NA | NA        |        | -0.096   | -0.234 |
| A014754_01 | -0.513    | -0.3   | 0.174     | 0.141     | -0.328    | -0.377 | -0.137   | -0.21  |
| A014755_01 | -0.226    | -0.152 | 0.354     | 0.3       | -0.097    | 0.113  | 0.167    | 0.192  |
| A014758_01 | -1.03     | -0.515 | 0.123     | 0.007     | -0.756    | 0.056  | -0.046   | -0.213 |
| A014759_01 | 1.109     | 1.086  | -0.088    | -0.095    | 0.647     | 0.802  | 0.63     | 0.953  |
| A014760_01 | -0.962 NA |        | 0.52      | 0.336     | -0.302    | -0.434 | -0.096   | -0.227 |
| A014761_01 | -0.039    | 0.011  | 0.393     | 0.207     | 0.407     | 0.476  | 0.158    | 0.286  |
| A014762_01 | -0.215    | -0.41  | -0.026    | -0.108    | -0.324    | -0.442 | -0.265   | -0.482 |
| A014763_01 | -0.773    | -0.069 | 0.025     | 0.092     | -0.646    | -0.047 | 0.282    | 0.157  |
| A014765_01 | -0.06     | 0.129  | 0.403     | 0.254     | 0.154     | 0.213  | 0.323    | 0.269  |
| A014767_01 | -1.51     | -0.999 | 0.104     | -0.033    | -0.518    | -0.361 | 0.275    | 0.128  |
| A014769_01 | 0.039     | 0.02   | -0.076    | -0.07     | 0.258     | 0.452  | 0.711    | 0.66   |
| A014771_01 | -1.151    | -1.203 | -0.427    | -0.568    | -0.849    | -0.76  | -0.208   | -0.548 |
| A014774_01 | 0.85      | 0.432  | 0.176     | 0.154     | 0.197     | 0.034  | -0.028   | 0.114  |
| A014777_01 | -0.223    | 0.031  | 0.01      | -0.062    | -0.388    | -0.165 | -0.018   | -0.036 |
| A014780_01 | 0.516     | 0.249  | -0.312    | -0.219    | 0.073     | -0.098 | -0.014   | 0.162  |
| A014783_01 | -1.107    | -0.836 | 0.502     | 0.26      | 0.128     | -0.024 | 0.085    | -0.069 |
| A014785_01 | -0.466 NA |        | 0.289     | 0.248     | -0.308    | -0.469 | -0.459   | -0.44  |

|            |           |        |           |           |           |           |          |        |
|------------|-----------|--------|-----------|-----------|-----------|-----------|----------|--------|
| A014789_01 | -0.408    | 0.001  | -1.394    | -1.242    | -1.551    | -0.349    | -0.618   | -0.594 |
| A014793_01 | -1.281    | -0.229 | -0.006    | -0.132    | -0.141    | -0.215    | 0.031    | -0.086 |
| A014794_01 | 0.27      | -0.222 | 0.145     | -0.11     | 0.179     | -0.103    | -0.048   | -0.356 |
| A014798_01 | -0.284 NA |        | 0.179     | 0.211     | 0.089 NA  |           | 0.095    | -0.119 |
| A014799_01 | -1.989 NA | NA     | NA        | NA        |           | -2.207 NA | NA       |        |
| A014800_01 | -0.519    | -0.221 | 0.095     | -0.022    | 0.26      | 0.127     | 0.087    | 0.024  |
| A014801_01 | -0.976    | -0.873 | -0.771    | -0.693    | -0.749    | -0.665    | -0.331   | -0.363 |
| A014802_01 | NA        | -0.003 | -0.44 NA  | NA        | NA        | NA        |          | -0.212 |
| A014805_01 | NA        | NA     | 0.099     | 0.184 NA  | NA        |           | -0.077   | -0.061 |
| A014806_01 | -0.868    | -0.562 | 0.26      | -0.106    | -0.08     | -0.275    | 0.212    | -0.206 |
| A014811_01 | -0.49     | -0.244 | 0.188     | 0.249     | 0.309     | 0.279     | 0.447    | 0.416  |
| A014819_01 | 0.117     | 0.092  | 0.3       | 0.154     | 0.016     | -0.057    | 0.048    | -0.082 |
| A014821_01 | -0.507    | -0.246 | 0.027     | -0.008    | -0.175    | 0.035     | -0.156   | -0.104 |
| A014825_01 | NA        | NA     | -0.392    | -0.547 NA | NA        | NA        |          | -0.827 |
| A014832_01 | -0.197    | 0.084  | 0.103     | 0.089     | -0.059    | 0.028     | -0.029   | -0.017 |
| A014833_01 | NA        | NA     | 0.346     | 0.097 NA  | NA        |           | 0.309    | 0.287  |
| A014835_01 | 0.356     | 0.234  | 0.272     | 0.146     | 0.356     | 0.206     | 0.241    | 0.21   |
| A014838_01 | -0.097 NA |        | -0.012    | -0.066    | -0.298    | -0.408    | 0.081 NA |        |
| A014842_01 | 0.629     | 0.708  | 0.057     | 0.261     | 0.32      | 0.356     | 0.135    | 0.342  |
| A014848_01 | NA        | NA     | 0.095     | -0.043 NA | NA        |           | -0.001   | -0.137 |
| A014850_01 | 0.261     | -0.03  | -0.024    | -0.173    | -0.01     | -0.041    | 0.291    | 0.232  |
| A014851_01 | NA        | NA     | -0.476    | -0.682 NA | NA        |           | -0.93 NA |        |
| A014855_01 | -0.196    | -0.521 | -0.513    | -0.549    | 0.363     | 0.405     | 0.354    | 0.23   |
| A014858_01 | 0.51      | 0.458  | 0.37      | 0.212     | -0.068    | -0.091    | 0.097    | 0.174  |
| A014860_01 | 0.235     | 0.123  | 0.727     | 0.414     | 0.18      | 0.236     | 0.193    | 0.201  |
| A014862_01 | 0.454     | 0.396  | 0.394     | 0.339     | 0.443     | 0.418     | 0.287    | 0.273  |
| A014867_01 | -1.878 NA | NA     | NA        |           | -1.46 NA  | NA        | NA       |        |
| A014874_01 | -0.561 NA |        | 0.083     | -0.045    | -0.053 NA |           | 0.224    | 0.238  |
| A014875_01 | NA        | NA     | -0.105 NA | NA        | NA        | NA        | NA       |        |
| A014876_01 | 1.096     | 0.818  | 0.699     | 0.441     | 1.089     | 0.796     | 0.554    | 0.512  |
| A014888_01 | -0.338    | -0.244 | -0.317    | -0.105    | -0.112    | -0.04     | 0.178    | 0.143  |
| A014892_01 | NA        | NA     | 0.478     | 0.208     | 0.812     | 0.827     | 0.392    | 0.376  |
| A014899_01 | 0.212     | 0.365  | 0.003     | 0.022     | -0.139    | 0.093     | 0.21     | 0.175  |
| A014904_01 | -0.532    | -0.579 | -0.277    | -0.31     | -0.462    | -0.379    | -0.121   | -0.41  |
| A014914_01 | -0.574    | -0.747 | -0.043    | -0.082    | -1.477    | -1.429    | -0.682   | -0.758 |
| A014915_01 | NA        | NA     | 0.391     | 0.125 NA  | NA        |           | -0.115   | -0.414 |
| A014919_01 | -1.247    | -0.792 | -0.017    | -0.099    | 0.05      | 0.181     | 0.383    | 0.269  |
| A014925_01 | 0.04      | 0.013  | -0.442    | -0.442    | -0.247    | -0.264    | -0.224   | -0.182 |
| A014927_01 | -0.709    | -0.275 | 0.37      | 0.386     | 0.786     | 0.431     | 0.543    | 0.64   |
| A014928_01 | 0.203     | -0.178 | 0.328     | 0.179     | 0.692     | 0.545     | 0.717    | 0.62   |
| A014929_01 | 0.4       | 0.488  | 0.244     | 0.233     | 0.228     | 0.362     | 0.207    | 0.236  |
| A014931_01 | 0.038     | 0.196  | -0.147    | -0.144    | -0.131    | 0.059     | 0.203    | 0.25   |
| A014932_01 | -0.142    | -0.005 | 0.41      | 0.311     | 0.048 NA  |           | -0.119   | -0.134 |
| A014933_01 | 0.073     | 0.059  | 0.218     | 0.042     | -0.138    | -0.105    | 0.135    | 0.02   |
| A014935_01 | 0.221     | 0.101  | 0.004     | -0.117    | 0.274     | 0.288     | 0.387    | 0.34   |
| A014936_01 | -0.313 NA |        | -0.075    | -0.12     | -0.42 NA  |           | 0.253    | 0.141  |
| A014938_01 | 0.074     | 0.01   | -0.023    | -0.158    | 0.042     | -0.06     | -0.011   | -0.124 |
| A014939_01 | 0.221     | 0.535  | 0.48      | 0.447     | 0.554     | 0.527     | 0.416    | 0.485  |
| A014942_01 | -0.289    | -0.053 | -0.118    | -0.154    | 0.522     | 0.169     | 0.13     | 0.007  |
| A014945_01 | 1.3       | 0.954  | -0.483    | -0.539    | 1.146     | 0.936     | 1.039    | 1.182  |
| A014947_01 | 0.073     | 0.067  | 0.559     | 0.484     | 0.031     | 0.251     | 0.34     | 0.219  |
| A014948_01 | 0.831     | 0.759  | -0.112    | -0.095    | 0.928     | 0.909     | 0.463    | 0.565  |
| A014951_01 | 0.281     | 0.192  | -0.851    | -0.868    | -0.944    | -0.808    | -0.791   | -1.083 |
| A014952_01 | 0.171     | 0.188  | 0.19      | 0.123     | -0.196    | -0.113    | 0.293    | 0.199  |
| A014953_01 | NA        | NA     | 0.342     | 0.125 NA  | NA        |           | 0.209    | 0.085  |
| A014954_01 | -0.325    | 0.182  | -0.591    | -0.38     | 0.501     | 0.561     | 0.677    | 0.79   |
| A014955_01 | 0.83      | 0.676  | 0.346     | 0.236     | 0.523     | 0.377     | 0.356    | 0.264  |
| A014965_01 | NA        | NA     | -0.181 NA | NA        | NA        | NA        | NA       |        |
| A014971_01 | -0.176    | 0.147  | -0.041    | -0.014    | 0.327     | 0.114     | -0.021   | 0.008  |
| A014974_01 | NA        | 0.138  | -0.273    | -0.219    | 0.215 NA  |           | 0.037    | 0.385  |
| A014976_01 | 0.535     | 0.361  | 0.063 NA  |           | 0.462     | 0.329     | 0.488    | 0.38   |
| A014979_01 | 0.045     | -0.173 | -0.049    | 0.065     | -0.269    | -0.161    | -0.17    | -0.135 |
| A014980_01 | NA        | NA     | 0.065 NA  |           | -0.043 NA | NA        |          | 0.025  |
| A014982_01 | 0.746     | 0.392  | -0.4      | -0.261    | 0.335     | 0.142     | 0.157    | 0.133  |
| A014984_01 | -1.264    | -0.358 | 0.354     | 0.377     | -0.519    | -0.238    | -0.228   | 0.036  |
| A014986_01 | -0.624    | -0.311 | 0.258     | 0.182     | 0.175     | 0.034     | 0.083    | 0.019  |
| A014989_01 | 0.383     | 0.251  | 0.032     | -0.008    | -0.114    | -0.228    | -0.162   | -0.163 |
| A014991_01 | -0.849    | -0.531 | 0.381     | 0.333     | -0.538    | -0.366    | -0.214   | -0.203 |

|            |    |          |        |           |           |           |        |           |        |
|------------|----|----------|--------|-----------|-----------|-----------|--------|-----------|--------|
| A014996_01 |    | -0.857   | -0.153 | 0.176     | 0.058     | -0.527    | -0.299 | 0.094     | 0.114  |
| A015002_01 |    | 0.487    | 0.102  | -0.617    | -0.494    | 0.212     | 0.158  | 0.37      | 0.333  |
| A015008_01 |    | -0.138   | -0.009 | -0.186    | -0.137    | 0.042     | 0.201  | 0.001     | 0.063  |
| A015009_01 |    | -0.215   | -0.017 | 0.471     | 0.168     | 0.493     | 0.448  | 0.596     | 0.464  |
| A015011_01 |    | 0.349    | 0.325  | 0.206     | 0.033     | 0.381     | 0.432  | 0.18      | 0.263  |
| A015012_01 |    | -0.296   | -0.075 | -0.062    | -0.155    | 0.032     | 0.036  | -0.102    | -0.245 |
| A015013_01 |    | 0.466    | 0.465  | 0.246     | 0.421     | 0.709     | 0.929  | 0.408     | 0.749  |
| A015025_01 |    | -0.061   | -0.031 | -0.7      | -0.668    | -0.654    | -0.706 | -0.458    | -0.753 |
| A015035_01 | NA |          | NA     | 0.358     | 0.198 NA  |           | NA     | -0.113    | -0.228 |
| A015041_01 |    | -0.194   | -0.215 | -0.392    | -0.478    | -0.359    | -0.301 | 0.066     | -0.088 |
| A015042_01 | NA |          | NA     | 0.426     | 0.487     | -0.369 NA |        | -0.407    | -0.424 |
| A015044_01 |    | 0.083    | -0.033 | 0.072     | -0.013    | 0.061     | 0.081  | 0.178     | 0.15   |
| A015047_01 |    | -0.675   | -0.498 | -0.876    | -0.711    | -0.111    | 0.004  | -0.393    | -0.21  |
| A015050_01 |    | 0.958    | 0.494  | -0.474    | -0.423    | 0.317     | 0.206  | -0.054    | -0.012 |
| A015054_01 | NA |          | NA     | 0.374     | 0.231 NA  |           | NA     | 0.108     | -0.06  |
| A015056_01 |    | -0.315   | -0.492 | 0.008     | 0.128     | 0.153     | 0.044  | -0.019    | 0.082  |
| A015062_01 |    | -1.406   | -1.021 | 0.264     | 0.239     | -0.927    | -0.659 | -0.269    | -0.114 |
| A015066_01 |    | 0.506    | 0.526  | -0.031    | -0.037    | 0.205     | 0.19   | -0.05     | -0.013 |
| A015067_01 |    | 0.321 NA |        | 0.281 NA  |           | 0.476 NA  |        | NA        | NA     |
| A015071_01 |    | 0.814    | 1.177  | -0.043    | -0.193    | -0.087    | 0.595  | 0.185     | 0.164  |
| A015072_01 |    | -1.433   | -1.314 | -0.797    | -0.624    | -1.02     | -0.908 | -0.605    | -0.826 |
| A015075_01 |    | -1.88    | -1.15  | 0.579     | 0.596     | -0.957    | -0.658 | -0.331    | -0.367 |
| A015077_01 |    | -0.411   | -0.609 | -0.314    | -0.076    | -0.7      | -0.669 | -0.374    | -0.432 |
| A015079_01 | NA |          | NA     | -0.092    | -0.226 NA |           | NA     | -0.12     | -0.517 |
| A015081_01 | NA |          | NA     | 0.197     | 0.034 NA  |           | NA     | -0.155    | -0.244 |
| A015082_01 |    | 0.785    | 0.391  | 0.262     | 0.149     | 0.232     | 0.019  | -0.061    | -0.249 |
| A015083_01 |    | -0.244   | -0.173 | -0.37     | -0.319    | -0.067    | 0.055  | 0.462     | 0.419  |
| A015084_01 |    | -0.231   | -0.114 | -0.196    | -0.122    | 0.444     | 0.487  | 0.385     | 0.331  |
| A015088_01 |    | -0.83    | -0.59  | 0.291     | 0.265     | 0.235     | 0.353  | 0.321     | 0.346  |
| A015090_01 | NA |          | NA     | 0.107     | 0.096     | -0.255    | -0.277 | -0.283    | -0.585 |
| A015092_01 |    | 0.273    | 0.271  | 0.199     | 0.154     | 0.28      | 0.168  | 0.218     | 0.369  |
| A015093_01 |    | -0.125   | -0.051 | -0.546    | -0.294    | -0.196    | -0.347 | -0.419    | -0.178 |
| A015095_01 | NA |          | NA     | -1.785    | -1.646 NA |           | NA     | -2.013 NA |        |
| A015096_01 |    | 0.653    | 0.252  | -0.059    | -0.133    | 0.142     | -0.035 | 0.262     | 0.212  |
| A015097_01 |    | 0.759    | 0.215  | -0.223    | -0.28     | 0.172     | -0.079 | 0.196     | 0.135  |
| A015098_01 |    | 0.849 NA |        | 0.185     | -0.033    | 0.406     | 0.304  | 0.167     | 0.132  |
| A015102_01 |    | 0.006    | 0.424  | -0.567    | -0.602    | -0.179    | 0.09   | 0.814     | 0.381  |
| A015105_01 |    | -0.521   | -0.184 | 0.847     | 0.686     | 0.912     | 0.632  | 0.616     | 0.545  |
| A015108_01 |    | -0.591   | -0.561 | -0.179    | -0.144    | -0.551    | -0.628 | -0.463    | -0.59  |
| A015109_01 | NA |          | NA     | -0.514    | -0.643 NA |           | NA     | -0.6      | -0.641 |
| A015111_01 | NA |          | NA     | 0.185     | 0.146 NA  |           | NA     | 0.519     | 0.289  |
| A015114_01 |    | -0.604   | -0.558 | 0.071     | 0.023     | -0.766    | -0.423 | 0.001     | -0.071 |
| A015118_01 |    | 0.756    | 0.402  | 0.13      | 0.052     | 0.307     | 0.169  | 0.222     | 0.157  |
| A015121_01 |    | 0.312 NA |        | 0.323     | 0.087 NA  |           | NA     | 0.131 NA  |        |
| A015124_01 |    | 0.148    | 0.135  | 0.163     | 0.089     | 0.364     | 0.351  | 0.116     | 0.092  |
| A015125_01 |    | -0.023   | -0.215 | -0.352    | -0.329    | -0.275    | -0.411 | -0.25     | -0.281 |
| A015126_01 | NA |          | NA     | -0.415    | -0.443 NA |           | NA     | -0.42     | -0.467 |
| A015128_01 | NA |          | NA     | 0.194     | 0.056     | -0.33 NA  |        | 0.19      | 0.132  |
| A015129_01 |    | -0.557   | -0.159 | 0.04      | 0.097     | -1.085    | -0.732 | -0.369    | -0.443 |
| A015134_01 |    | -0.225   | 0.206  | 1.046     | 0.8       | 0.574     | 0.499  | 0.141     | 0.022  |
| A015141_01 |    | 0.452    | 0.093  | -0.445    | -0.397    | -0.034    | -0.207 | 0.171     | 0.178  |
| A015144_01 |    | 0.543    | 0.126  | -0.728    | -0.64     | -0.602    | -0.457 | -0.22     | 0.015  |
| A015147_01 | NA |          | NA     | -0.313 NA |           | -0.456 NA |        | -0.186 NA |        |
| A015148_01 |    | 0.811    | 0.413  | 0.266     | 0.237     | 0.366     | 0.134  | 0.228     | 0.23   |
| A015149_01 |    | 0.199    | 0.04   | 0.458     | 0.314     | 0.281     | -0.112 | -0.123    | -0.189 |
| A015157_01 |    | 0.833    | 0.442  | 0.405     | 0.464     | 0.076     | -0.108 | 0.011     | 0.253  |
| A015160_01 |    | 0.649    | 0.263  | -0.103 NA |           | 0.311     | 0.026  | 0.489     | 0.514  |
| A015163_01 |    | 0.355 NA |        | 0.026     | 0.165 NA  |           | NA     |           | 0.233  |
| A015165_01 |    | -0.438   | -0.099 | 0.301     | 0.276     | -0.753    | -0.581 | -0.311    | -0.352 |
| A015167_01 | NA |          | NA     | 0.749     | 0.511     | -0.094 NA |        | 0.014     | 0.067  |
| A015168_01 |    | -0.566   | -0.2   | 0.484     | 0.441     | 0.253     | 0.214  | 0.446     | 0.405  |
| A015171_01 | NA |          | NA     | 0.374     | 0.327 NA  |           | NA     | -0.453    | -0.459 |
| A015181_01 |    | -0.276   | -0.461 | -0.484    | -0.367    | -0.507    | -0.545 | -0.312    | -0.324 |
| A015182_01 |    | -0.002   | 0.543  | 0.477     | 0.445     | 0.499     | 0.41   | 0.433     | 0.428  |
| A015183_01 | NA |          | NA     | 0.382     | 0.236 NA  |           | NA     | 0.067     | -0.28  |
| A015185_01 |    | -0.692   | -0.634 | -0.015    | -0.183    | -0.216    | -0.095 | -0.053    | -0.174 |
| A015187_01 |    | 0.143 NA |        | 0.12      | 0.117 NA  |           | NA     | -0.551    | -0.393 |
| A015190_01 |    | 0.38 NA  |        | 0.264     | 0.049     | 0.318     | -0.044 | 0.596     | 0.075  |

|            |    |           |           |          |           |           |           |           |        |
|------------|----|-----------|-----------|----------|-----------|-----------|-----------|-----------|--------|
| A015196_01 |    | -0.511    | -0.584    | -0.082   | -0.056    | -0.381    | -0.466    | -0.41     | -0.323 |
| A015197_01 |    | 0.722     | 0.569     | 0.269    | 0.045     | 0.524     | 0.253     | 0.222     | 0.21   |
| A015199_01 |    | 0.538     | 0.162 NA  | NA       |           | 0.23      | -0.145    | 0.53 NA   |        |
| A015203_01 |    | -0.635    | -0.735    | -0.645   | -0.502    | -0.486    | -0.635    | -0.429    | -0.424 |
| A015220_01 |    | -0.155    | -0.106    | -0.231   | -0.185    | -0.071    | -0.127    | -0.095    | -0.24  |
| A015223_01 |    | 0.027     | 0.168     | -0.108   | -0.006    | 0.111     | 0.303     | 0.332     | 0.443  |
| A015232_01 |    | -0.077    | 0.168     | 0.019    | -0.065    | -0.287    | -0.436    | -0.409    | -0.514 |
| A015235_01 |    | -0.609    | -1.33 NA  | NA       |           | -0.911    | -1.261 NA | NA        |        |
| A015236_01 |    | -0.133    | -0.296    | 0.289    | 0.16      | -0.237    | -0.211    | 0.02      | 0.014  |
| A015237_01 |    | -0.931    | -0.718    | -0.11    | -0.085    | -0.826    | -0.454    | -0.375    | -0.262 |
| A015239_01 |    | 0.745     | 0.296     | -0.168   | -0.039    | 0.141     | 0.16      | 0.234     | 0.398  |
| A015240_01 |    | -0.269 NA |           | -0.69    | -0.68     | -0.598    | -0.757    | -0.596    | -0.63  |
| A015243_01 |    | -0.738    | -0.433    | 0.448    | 0.371     | 0.001     | -0.119    | -0.128    | -0.129 |
| A015246_01 | NA | NA        |           | -0.145   | -0.271 NA | NA        | NA        |           | -0.292 |
| A015249_01 |    | 0.165     | 0.525     | -0.024   | 0.107     | 0.855     | 0.871     | 0.668     | 0.856  |
| A015251_01 |    | 0.154     | 0.225     | -0.262   | -0.172    | 0.4       | 0.473     | 0.146     | 0.28   |
| A015257_01 |    | -0.977    | -1.055    | 0.305    | 0.143     | -0.523    | -0.434    | -0.196    | -0.273 |
| A015260_01 |    | 0.031     | 0.093     | -0.046   | -0.084    | -0.023    | -0.122    | 0.19      | 0.015  |
| A015263_01 |    | -1.154    | -1.411    | 0.813    | 0.714     | -0.276    | -0.22     | -0.318    | -0.27  |
| A015264_01 | NA | NA        |           | 0.136    | 0.154     | -0.269 NA |           | 0.139     | -0.015 |
| A015265_01 |    | -0.62     | -0.391    | -0.4     | -0.43     | -0.696    | -0.809    | -0.519    | -0.754 |
| A015266_01 | NA | NA        |           | -0.358   | -0.53 NA  | NA        |           | -0.399    | -0.7   |
| A015267_01 | NA | NA        |           | 0.919    | 0.615     | 0.252     | 0.182     | 0.242     | 0.105  |
| A015269_01 |    | 0.195     | 0.386     | -0.499   | -0.414    | -0.062    | 0.273     | 0.273     | 0.54   |
| A015271_01 |    | 0.016     | 0.058     | -0.086   | -0.191    | 0.506     | 0.087     | 0.263     | 0.163  |
| A015272_01 |    | -0.114    | 0.171     | 0.051    | -0.069    | 0.429     | 0.382     | 0.365     | 0.366  |
| A015279_01 |    | -0.307    | -0.161    | -0.02    | 0.042     | 0.465     | 0.361     | 0.471     | 0.548  |
| A015281_01 | NA |           | 0.393     | 0.638    | 0.607     | 1.351     | 0.948     | 0.737     | 0.616  |
| A015283_01 |    | -1.031    | -0.713    | 0.235    | 0.394     | -0.619    | -0.542    | -0.282    | -0.167 |
| A015284_01 |    | 0.313     | 0.244     | 0.222    | 0.186     | 0.249     | 0.177     | -0.075    | -0.041 |
| A015285_01 |    | -0.637    | -0.356    | -0.354   | -0.492    | -0.373    | -0.065    | 0.376     | 0.033  |
| A015286_01 |    | -0.981    | -0.929    | -0.89    | -0.642    | -1.178    | -0.758    | -0.72     | -0.493 |
| A015294_01 | NA | NA        |           | -0.206   | -0.146    | -0.526 NA |           | -0.651    | -0.645 |
| A015296_01 |    | -0.514    | -0.325    | -0.071   | -0.136    | 0.021     | -0.058    | 0.137     | -0.052 |
| A015301_01 | NA | NA        |           | 0.322    | 0.094     | 0.441 NA  |           | 0.336 NA  |        |
| A015302_01 |    | -0.857    | -1.224    | -0.498   | -0.421    | -1.09     | -0.933    | -0.85     | -0.961 |
| A015313_01 |    | -0.478    | -0.526    | 0.521    | 0.355     | 0.689     | 0.454     | 0.459     | 0.478  |
| A015314_01 |    | -0.861    | -0.561    | 0.248    | 0.153     | -0.179    | -0.082    | -0.054    | -0.094 |
| A015319_01 |    | 0.526     | 0.219     | 0.186    | 0.207     | 0.358     | 0.391     | 0.206     | 0.196  |
| A015320_01 |    | 0.582     | 0.292     | 0.188 NA | NA        |           | 0.176 NA  | NA        |        |
| A015321_01 |    | -0.535    | -0.292    | -0.27    | -0.376    | 0.21      | 0.211     | 0.169     | 0.036  |
| A015323_01 |    | -0.366    | -0.375    | 0.562    | 0.413     | -0.108    | -0.257    | 0.068     | -0.009 |
| A015331_01 |    | -0.827    | -0.703    | -0.494   | -0.381    | -0.516    | -0.454    | -0.532    | -0.514 |
| A015336_01 |    | 0.143     | 0.114     | 0.207    | 0.234     | 0.195     | 0.231     | 0.226     | 0.097  |
| A015339_01 |    | 0.332     | 0.68      | -0.216   | -0.146    | 0.875     | 0.855     | 1.022     | 1.092  |
| A015345_01 |    | -1.738    | -1.789 NA |          | -3.179    | -1.964    | -1.785    | -2.097    | -2.093 |
| A015349_01 |    | 0.34      | 0.131     | 0.193    | 0.045     | 0.229     | 0.289     | 0.223     | 0.304  |
| A015351_01 |    | 0.279     | 0.856     | -0.061   | -0.042    | 0.218     | 0.686     | 0.241     | 0.385  |
| A015356_01 | NA |           | 0.355     | -0.125   | -0.083 NA | NA        |           | -0.074    | -0.026 |
| A015357_01 |    | 0.451     | 0.267     | -0.3     | -0.238    | -0.022    | 0.061     | 0.382     | 0.383  |
| A015360_01 |    | -0.231    | -0.279    | 0.232    | 0.146     | -0.66     | -0.802    | -0.535    | -0.518 |
| A015361_01 | NA | NA        |           | 0.251    | 0.142 NA  |           | 0.152     | 0.111     | 0.179  |
| A015368_01 |    | 0.791     | 0.361     | -0.201   | -0.124    | 0.217     | 0.216     | -0.001    | 0.109  |
| A015378_01 |    | 0.248     | 0.474     | 0.093    | 0.152     | 0.117     | 0.429     | 0.469     | 0.647  |
| A015380_01 |    | 0.728     | 0.743     | 0.684    | 0.509     | 0.539     | 0.219     | 0.235     | 0.208  |
| A015388_01 |    | 0.105     | -0.282    | -0.054   | -0.102    | -0.238    | -0.237    | -0.018    | -0.149 |
| A015394_01 |    | -0.838    | -0.423    | 0.679    | 0.619     | 0.433     | 0.488     | 0.336     | 0.203  |
| A015397_01 |    | 0.716 NA  |           | -0.058   | -0.351 NA |           | -0.099    | -0.029 NA |        |
| A015404_01 |    | -0.499    | -0.213    | -0.069   | 0.042     | -0.256    | -0.138    | -0.059    | -0.164 |
| A015414_01 | NA | NA        |           | -0.008   | -0.067 NA | NA        |           | -0.157    | -0.087 |
| A015422_01 |    | 0.277     | 0.494     | 0.263    | 0.254     | 0.701     | 0.521     | 0.058     | 0.016  |
| A015423_01 |    | -0.133 NA |           | 0.193    | -0.222    | 0.117     | 0.004     | 0.314     | -0.069 |
| A015431_01 |    | 0.629     | 0.769     | 0.116    | 0.197     | -0.465    | -0.184    | -0.192    | -0.064 |
| A015432_01 |    | -0.933    | -0.674    | 0.16     | 0.127     | -0.294    | -0.087    | 0.042     | -0.018 |
| A015434_01 | NA | NA        |           | 0.376    | 0.315 NA  | NA        |           | -0.189    | -0.321 |
| A015435_01 | NA | NA        |           | 0.062    | -0.001    | -0.184 NA |           | -0.292    | -0.322 |
| A015439_01 |    | 0.499     | 0.516     | 0.54     | 0.442     | 0.525     | 0.61      | 0.39      | 0.463  |
| A015442_01 |    | 1.126     | 0.836     | 0.146 NA |           | 0.56      | 0.217 NA  |           | 0.422  |

|            |    |           |        |           |           |           |           |           |        |
|------------|----|-----------|--------|-----------|-----------|-----------|-----------|-----------|--------|
| A015444_01 |    | -0.7      | -0.563 | 0.016     | -0.148    | -0.487    | -0.474    | -0.158    | -0.418 |
| A015445_01 |    | 0.046     | 0.135  | 0.323     | 0.288     | 0.124     | 0.26      | 0.109     | 0.291  |
| A015446_01 |    | -0.644    | -0.223 | -0.025    | -0.019    | 0.765     | 0.756     | 1.117     | 1.234  |
| A015447_01 |    | 0.417     | 0.453  | 0.197     | 0.261     | 0.891     | 0.897     | 0.632     | 0.783  |
| A015448_01 |    | 1.121     | 0.727  | 0.075     | 0.085     | 0.473     | 0.369     | 0.244     | 0.078  |
| A015450_01 |    | -0.414 NA |        | 0.326     | 0.028     | -0.016    | 0.061     | 0.189     | -0.178 |
| A015453_01 |    | 0.228     | 0.383  | -0.318    | -0.237    | 0.964     | 0.964     | 0.535     | 0.631  |
| A015454_01 |    | -0.166    | 0.05   | 0.028     | -0.097    | -0.061 NA |           | 0.084 NA  |        |
| A015455_01 | NA |           | NA     | 0.327     | 0.097     | -0.184 NA |           | -0.138    | -0.329 |
| A015457_01 |    | -0.749    | -0.624 | 0.26      | 0.221     | -0.022    | 0.049     | 0.215     | 0.067  |
| A015458_01 |    | -0.29     | -0.396 | -0.595    | -0.566    | -0.263    | -0.154    | -0.031    | -0.046 |
| A015462_01 |    | 0.196     | 0.114  | -0.156    | -0.285    | 0.045     | -0.094    | 0.336     | 0.236  |
| A015463_01 |    | -0.683 NA |        | -0.379    | -0.319    | -0.021    | 0.081     | -0.004    | -0.093 |
| A015464_01 | NA |           | -0.851 | -1.595    | -1.361 NA |           | -1.013    | -0.916    | -1.219 |
| A015465_01 |    | -0.616    | -0.583 | -1.09     | -0.888    | -0.904    | -0.726    | -0.862    | -0.678 |
| A015466_01 |    | -0.702    | -0.145 | -0.186    | -0.176    | -0.227    | 0.083     | -0.083    | 0.038  |
| A015472_01 | NA |           | -0.506 | -0.949 NA |           | -0.546    | -0.558 NA |           | NA     |
| A015473_01 |    | 0.399     | 0.142  | 0.265     | 0.164     | -0.083    | -0.293    | -0.194    | -0.218 |
| A015474_01 |    | 0.6       | 0.462  | 0.33      | 0.282     | 0.038     | -0.197    | 0.085     | -0.069 |
| A015475_01 |    | -0.157    | -0.44  | -0.514 NA |           | -0.161 NA |           | NA        | NA     |
| A015477_01 |    | -0.397    | -0.086 | -0.091    | -0.011    | 0.038     | 0.156     | -0.002    | 0.047  |
| A015481_01 |    | 0.083     | 0.156  | 0.315     | 0.206     | 0.241     | 0.205     | 0.203     | 0.204  |
| A015483_01 |    | -0.472    | 0.004  | 0.315     | 0.123     | 1.713     | 1.286     | 1.303     | 1.224  |
| A015484_01 |    | -0.544    | -0.403 | -1.032    | -0.69     | -0.666    | -0.335    | -0.507    | -0.457 |
| A015487_01 |    | 0.388     | 0.465  | 0.642     | 0.326     | 0.56      | 0.506     | 0.399     | 0.33   |
| A015490_01 |    | 0.088 NA  |        | 0.513     | 0.119     | 0.21 NA   |           | -0.004    | -0.231 |
| A015492_01 |    | -0.697    | -1.106 | -2.133 NA |           | -1.46     | -1.623    | -0.058    | -0.056 |
| A015493_01 | NA |           | NA     | -0.035    | -0.128 NA |           | NA        | 0.296     | 0.31   |
| A015498_01 |    | 0.657     | 0.874  | 0.244     | 0.14      | 0.863     | 1.24      | 0.861     | 0.86   |
| A015504_01 |    | -0.561    | -0.027 | 0.726     | 0.51      | 0.525     | 0.527     | 0.585     | 0.505  |
| A015505_01 | NA |           | 0.104  | -0.353    | -0.459 NA |           | -0.015    | -0.096    | 0.024  |
| A015508_01 |    | 0.332     | 0.552  | 0.403     | 0.332     | 0.654 NA  |           | 0.524     | 0.497  |
| A015510_01 |    | 0.379     | 0.379  | 0.227     | 0.271     | 0.65      | 1.019     | 0.802     | 1.21   |
| A015511_01 |    | 1.443     | 0.084  | -0.422 NA |           | 0.799     | 0.07 NA   |           | 0.186  |
| A015513_01 |    | 0.509     | 0.36   | -0.004    | 0.065     | -0.122    | -0.04     | 0.007     | 0.118  |
| A015519_01 |    | -0.781    | -0.433 | -0.376    | -0.291    | -0.095 NA |           | 0.402     | 0.48   |
| A015522_01 |    | 0.327     | 0.002  | 0.006     | -0.192    | 0.184     | 0.017     | 0.217     | -0.181 |
| A015523_01 |    | -1.266    | -0.612 | 0.188     | 0.191     | 0.09      | 0.212     | 0.102     | 0.182  |
| A015524_01 |    | -0.87     | -0.799 | -0.112    | -0.006    | -0.766    | -0.691    | -0.461    | -0.465 |
| A015530_01 |    | -0.799    | -0.74  | 0.256     | 0.087     | -0.671    | -0.488    | -0.09     | -0.417 |
| A015534_01 |    | 0.46      | 0.482  | -0.199    | 0.053     | 0.55      | 0.561     | 0.454     | 0.786  |
| A015536_01 |    | 0.117     | 0.019  | -0.461    | -0.33     | -0.315    | -0.114    | -0.302    | -0.068 |
| A015539_01 |    | 0.505     | 0.319  | -0.065    | -0.03     | 0.557     | 0.578     | 0.532     | 0.799  |
| A015540_01 |    | 0.304     | 0.748  | 0.099     | 0.167     | 0.27      | 0.753     | 0.451     | 0.685  |
| A015543_01 |    | 0.023     | 0.182  | -0.164    | -0.147    | 0.562     | 0.561     | 0.901     | 0.937  |
| A015548_01 |    | 0.254     | 0.483  | 0.291     | 0.282     | 0.557     | 0.831     | 1.009     | 1.179  |
| A015550_01 |    | 0.25      | 0.23   | 0.406     | 0.222     | 0.433     | 0.04      | 0.263     | 0.118  |
| A015558_01 |    | -1.019    | -1.022 | 0.237     | 0.271     | 0.358     | 0.554     | 0.326     | 0.381  |
| A015563_01 | NA |           | NA     | 0.314     | 0.209 NA  |           | NA        | -0.148    | -0.292 |
| A015571_01 |    | 0.702 NA  |        | 0.198     | -0.028    | 0.048     | 0.112     | -0.044    | -0.002 |
| A015576_01 | NA |           | NA     | -0.049    | -0.058    | -0.174    | -0.082    | -0.264    | -0.248 |
| A015578_01 |    | 0.517 NA  |        | 0.269     | 0.032     | 0.439 NA  |           | 0.356     | 0.02   |
| A015579_01 |    | -1.893    | -0.962 | -0.103    | -0.078    | -0.408    | -0.192    | -0.093    | -0.176 |
| A015585_01 |    | -0.037    | -0.499 | -0.835    | -0.72     | -0.472    | -0.68     | -0.501    | -0.315 |
| A015586_01 | NA |           | NA     | -0.538 NA |           | -0.11     | -0.579    | -0.328 NA |        |
| A015587_01 |    | -0.11     | -0.087 | -0.368    | -0.289    | 0.142     | 0.108     | 0.149     | 0.198  |
| A015591_01 |    | 0.898     | 0.814  | 0.118     | 0.134     | 0.161     | 0.394     | 0.421     | 0.422  |
| A015595_01 |    | 0.477     | 0.284  | 0.489     | 0.367     | 0.787     | 0.677     | 0.54      | 0.465  |
| A015599_01 | NA |           | NA     | -0.143    | -0.142 NA |           | NA        | -0.641    | -0.66  |
| A015600_01 | NA |           | NA     | -0.048    | -0.115 NA |           | NA        |           | NA     |
| A015605_01 | NA |           | -0.305 | -0.289 NA |           | 0.165     | -0.139 NA |           | NA     |
| A015607_01 |    | 0.536     | 0.522  | -0.054    | -0.151    | 0.129     | 0.103     | 0.103     | 0.325  |
| A015608_01 | NA |           | NA     | -0.312    | -0.056 NA |           | NA        | 0.024     | 0.384  |
| A015613_01 |    | -0.305    | -0.5   | -0.045    | -0.199    | -0.605    | -0.733    | -0.29     | -0.519 |
| A015616_01 | NA |           | NA     | 0.019 NA  |           | 0.241     | 0.143     | 0.002 NA  |        |
| A015617_01 |    | 0.355     | 0.341  | 0.11      | 0.111     | 0.367     | 0.445     | 0.131     | 0.217  |
| A015619_01 |    | 0.504     | 0.264  | -0.268    | -0.134    | 0.12      | -0.104    | -0.135    | -0.072 |
| A015625_01 | NA |           | NA     | 0.232     | 0.168 NA  |           | NA        | 0.282 NA  |        |

|            |    |           |          |           |           |           |           |           |        |
|------------|----|-----------|----------|-----------|-----------|-----------|-----------|-----------|--------|
| A015629_01 |    | 0.293     | 0.412    | -0.533    | -0.185    | -0.295    | 0.115     | -0.269    | 0.259  |
| A015634_01 |    | -0.269    | -0.093   | -0.058    | -0.085    | 0.63      | 0.608     | 0.419     | 0.431  |
| A015635_01 | NA | NA        |          | 0.061 NA  | NA        | NA        | NA        | NA        |        |
| A015637_01 | NA | NA        |          | 0.355     | 0.196 NA  | NA        | NA        |           | 0.138  |
| A015638_01 | NA |           | 0.469    | 0.194     | 0.187 NA  | NA        | NA        |           | 0.193  |
| A015639_01 |    | 0.085     | 0.201    | 0.363     | 0.393     | 0.844     | 0.886     | 0.071     | 0.223  |
| A015641_01 |    | 0.839     | 0.564    | 0.244     | 0.205     | 0.616     | 0.552     | 0.759     | 0.63   |
| A015643_01 |    | 0.308 NA  |          | 0.224     | 0.016     | 0.395 NA  |           | 0.239     | 0.075  |
| A015645_01 |    | -0.817    | -0.672   | -0.064    | -0.152    | -0.732    | -0.635    | -0.145 NA |        |
| A015646_01 |    | 0.363     | 0.266    | -0.165    | -0.042    | 0.062     | 0.284     | -0.075    | 0.212  |
| A015647_01 | NA |           | 0.305    | 0.013     | -0.037 NA |           | 0.704     | 0.654     | 0.494  |
| A015648_01 | NA |           | 0.033    | -0.178    | -0.25     | 0.399     | 0.453     | 0.283     | 0.28   |
| A015649_01 |    | 0.156     | 0.433    | 0.423     | 0.318     | 0.508     | 0.332     | 0.45      | 0.338  |
| A015650_01 |    | 0.119     | 0.245    | 0.147     | -0.023    | 0.4       | 0.323     | 0.234     | 0.112  |
| A015651_01 |    | 0.848     | 0.703    | 0.157     | 0.19      | 0.355     | 0.447     | 0.23      | 0.355  |
| A015653_01 | NA | NA        |          | 0.294     | 0.157 NA  | NA        |           | -0.187    | -0.469 |
| A015654_01 |    | 0.293 NA  |          | 0.254     | 0.222     | 0.063     | 0.184 NA  |           | 0.034  |
| A015658_01 |    | -0.187    | 0.059    | 0.366     | 0.27      | 0.746     | 0.697     | 0.383     | 0.349  |
| A015659_01 |    | 0.646     | 0.364    | 0.066 NA  | NA        | NA        | NA        | NA        |        |
| A015660_01 |    | 0.131     | 0.257    | -0.281    | -0.138    | 0.64      | 0.844     | 0.314     | 0.433  |
| A015662_01 | NA |           | -0.379   | -0.386    | -0.36 NA  | NA        |           | -0.101    | -0.239 |
| A015663_01 | NA |           | -0.546   | -0.312    | -0.302    | -0.516 NA |           | -0.56     | -0.46  |
| A015665_01 |    | 0.551     | 0.415    | -0.26     | -0.307    | 0.372     | 0.459     | -0.066    | -0.019 |
| A015667_01 |    | 0.575     | 0.403    | -0.218    | -0.261    | 0.256     | 0.156     | 0.201     | 0.23   |
| A015668_01 |    | 0.034     | -0.171   | 0.099     | 0.038     | 0.486     | 0.299     | 0.603     | 0.488  |
| A015673_01 |    | -0.224    | -0.092   | 0.136     | -0.113    | -0.054    | -0.14     | 0.077     | -0.022 |
| A015678_01 |    | -0.27     | -0.216   | -0.161    | -0.365 NA |           | 0.167     | 0.038     | -0.007 |
| A015679_01 |    | 0.005     | 0.223    | 0.171     | 0.157     | 0.325     | 0.605     | 0.787     | 0.809  |
| A015692_01 |    | 0.256     | 0.177    | 0.54 NA   |           | 0.297 NA  |           | -0.191 NA |        |
| A015697_01 |    | 0.228     | 0.11     | 0.061     | -0.122    | 0.017     | -0.005    | -0.131    | -0.234 |
| A015703_01 |    | -0.061    | -0.026   | -0.019    | -0.228    | 0.121     | -0.142    | 0.513     | 0.103  |
| A015705_01 |    | 0.54      | 0.422    | -0.381    | -0.066    | 0.069     | 0.418     | -0.008    | 0.411  |
| A015707_01 |    | 0.026     | 0.099    | 0.38      | 0.35      | 0.091     | 0.165     | 0.004     | 0.032  |
| A015713_01 |    | 0.361 NA  |          | 0.45      | 0.129     | 0.289     | 0.017     | 0.114     | -0.252 |
| A015716_01 |    | -0.652    | -0.463   | 0.584     | 0.285     | 0.17      | 0.107     | 0.075     | 0.013  |
| A015723_01 |    | 0.678     | 0.371    | 0.36      | 0.206     | 0.581     | 0.513     | 0.47      | 0.315  |
| A015724_01 |    | 0.191     | -0.157   | -0.455    | -0.391    | -0.272    | -0.383    | 0.018     | -0.044 |
| A015725_01 |    | 0.676     | 0.316    | -0.255    | -0.232    | -0.267    | -0.189    | -0.211    | -0.358 |
| A015733_01 |    | 1.093     | 0.922    | 0.396     | 0.404 NA  | NA        | NA        | NA        |        |
| A015739_01 |    | 0.237     | 0.228    | 0.346     | 0.378     | 0.207     | 0.495     | 0.162     | 0.207  |
| A015744_01 | NA | NA        |          | 0.308     | 0.179 NA  | NA        |           | 0.228     | -0.037 |
| A015747_01 | NA | NA        |          | 0.126     | 0.046 NA  |           | -0.185    | 0.111 NA  |        |
| A015750_01 | NA | NA        |          | 0.345     | 0.129 NA  | NA        |           | 0.002     | -0.202 |
| A015753_01 | NA |           | -0.353   | 0.115     | -0.129    | 0.08      | -0.206    | 0.188     | -0.074 |
| A015757_01 |    | 0.919     | 0.712    | -0.364    | -0.184    | -0.573    | -0.504    | -0.295    | -0.17  |
| A015762_01 |    | -0.012    | -0.199   | -0.007    | 0.007     | -0.585    | -0.758    | -0.475    | -0.393 |
| A015763_01 | NA | NA        |          | 0.231     | 0.251 NA  | NA        |           | -0.15     | -0.152 |
| A015772_01 | NA | NA        |          | -0.371    | -0.553 NA | NA        | NA        | NA        |        |
| A015776_01 |    | -0.541 NA |          | 0.44      | 0.287     | 0.421     | 0.441     | 0.396     | 0.483  |
| A015777_01 |    | 0.131     | -0.037   | -0.196    | -0.235    | 0.373     | 0.129     | 0.123     | -0.093 |
| A015778_01 |    | -0.375    | -0.055   | -0.106    | -0.2      | -0.118    | 0.036     | 0.471     | 0.486  |
| A015779_01 | NA | NA        |          | -0.069    | -0.082 NA | NA        |           | -0.426    | -0.516 |
| A015780_01 | NA |           | -0.313   | 0.247     | 0.121     | 0.199     | 0.207     | 0.168     | 0.225  |
| A015790_01 |    | -0.437    | -0.176   | 0.047     | -0.042    | 0.048     | 0.061     | -0.007    | 0.09   |
| A015793_01 |    | -1.132 NA |          | -1.139 NA |           | -0.721 NA | NA        | NA        |        |
| A015794_01 |    | -0.352    | -0.11    | -0.136    | -0.249    | -0.01     | 0.018     | 0.126     | -0.001 |
| A015797_01 |    | -0.747    | -1.018   | 0.295     | -0.016    | -0.883    | -0.913    | -0.517    | -0.591 |
| A015800_01 |    | 0.718     | 0.282 NA | NA        |           | 0.299     | 0.09 NA   | NA        |        |
| A015805_01 |    | -0.022    | -0.137   | 0.178     | 0.13      | -0.076    | -0.266    | 0.121     | 0.016  |
| A015822_01 |    | -1.019    | -0.666   | 0.122     | 0.386     | -0.165    | 0.077     | -0.286    | -0.036 |
| A015825_01 |    | -0.609    | -0.276   | 0.11      | 0.003     | -0.196    | -0.324    | 0.163     | -0.018 |
| A015827_01 |    | -0.978    | -0.681   | -0.269    | -0.25     | -0.305    | -0.293    | -0.12     | -0.17  |
| A015833_01 |    | -0.027    | -0.004   | 0.544     | 0.343     | 0.094     | 0.107     | -0.005    | -0.109 |
| A015835_01 | NA | NA        |          | -0.507    | -0.462    | 0.318 NA  |           | -0.021    | -0.211 |
| A015837_01 |    | -0.511 NA |          | -0.613 NA | NA        |           | -1.117 NA | NA        |        |
| A015840_01 |    | -0.016    | -0.455   | -0.903    | -0.79     | -0.345    | -0.539    | -0.42     | -0.652 |
| A015841_01 |    | -1.047    | -0.629   | -0.53     | -0.437    | -0.298 NA |           | 0.013     | -0.109 |
| A015843_01 | NA |           | -0.298   | 0.281     | 0.15      | -0.028    | 0.052     | 0.216     | 0.156  |



|            |    |           |        |           |           |           |           |           |        |
|------------|----|-----------|--------|-----------|-----------|-----------|-----------|-----------|--------|
| A015844_01 | NA | NA        |        | 0.279     | 0.057 NA  | NA        |           | -0.011    | -0.278 |
| A015850_01 |    | -0.208    | -0.532 | -0.804    | -0.66     | -0.371    | -0.313    | -0.735    | -0.693 |
| A015856_01 | NA | NA        |        | -0.104    | -0.127 NA | NA        |           | 0.271     | 0.48   |
| A015860_01 |    | -2.28 NA  |        | -2.112 NA |           | -2.533    | -2.463    | -2.331 NA |        |
| A015861_01 |    | -0.88 NA  |        | 0.444     | 0.288     | -0.161 NA |           | -0.112    | -0.277 |
| A015862_01 | NA | NA        |        | 0.211     | 0.109 NA  | NA        |           | -0.295    | -0.356 |
| A015864_01 | NA | NA        |        | -0.635 NA | NA        | NA        | NA        | NA        |        |
| A015866_01 |    | -0.211    | 0.042  | -0.216    | -0.185    | -0.627    | -0.139    | 0.16      | 0.084  |
| A015870_01 |    | 0.543     | 0.168  | 0.342     | 0.285     | 0.2       | 0.135     | 0.318     | 0.193  |
| A015874_01 | NA | NA        |        | 0.19      | 0.111 NA  | NA        |           | -0.013    | -0.123 |
| A015876_01 |    | 0.875     | 0.52   | -0.062    | -0.018    | 0.359     | 0.244     | 0.15      | 0.38   |
| A015877_01 |    | -0.682 NA |        | -0.938    | -0.823    | -0.656 NA |           | -0.386    | -0.734 |
| A015878_01 |    | 0.009     | 0.278  | 0.409     | 0.386     | 0.728     | 0.641     | 0.467     | 0.374  |
| A015879_01 | NA | NA        |        | 0.179     | 0.08      | -0.14 NA  |           | -0.627    | -0.89  |
| A015881_01 |    | -0.187    | -0.147 | -0.056    | -0.109    | 0.154     | 0.061     | 0.195     | 0.042  |
| A015882_01 |    | 0.281     | -0.047 | -0.435    | -0.648    | -0.265    | -0.481    | 0.156 NA  |        |
| A015883_01 |    | -0.299    | 0.249  | 0.731     | 0.592     | 0.535     | 0.476     | 0.259     | 0.232  |
| A015892_01 |    | -0.118    | 0.243  | 0.176     | 0.144     | 0.339     | 0.343     | 0.482     | 0.392  |
| A015893_01 |    | 0.53      | 0.395  | 0.078     | 0.111     | 0.036     | 0.07      | -0.005    | 0.28   |
| A015895_01 |    | -0.588    | -0.579 | -0.596    | -0.604    | -0.734    | -0.971    | -0.553    | -0.755 |
| A015896_01 |    | -0.925    | -0.596 | -0.288    | -0.238    | -0.318    | -0.215    | 0.028     | -0.034 |
| A015900_01 |    | -0.033    | 0.072  | 0.369     | 0.103     | 0.061     | 0.133     | 0.401     | 0.104  |
| A015904_01 |    | 0.425     | 0.133  | -0.252    | -0.131    | -0.558 NA |           | -0.687    | -0.528 |
| A015905_01 |    | 1.285     | 0.806  | -1.197    | -1.171    | 0.852     | 0.502     | 0.027     | 0.017  |
| A015906_01 |    | 0.192     | 0.039  | 0.112     | 0.05      | 0.372     | 0.113     | 0.395     | 0.268  |
| A015910_01 |    | 0.307     | 0.252  | 0.247     | 0.067     | 0.416     | 0.217     | 0.385     | 0.111  |
| A015913_01 |    | 0.21      | -0.027 | -0.558    | -0.471    | 0.523     | 0.595     | 0.601     | 0.569  |
| A015916_01 | NA | NA        |        | 0.016     | -0.264    | 0.312     | 0.108     | 0.305     | 0.088  |
| A015922_01 |    | -0.341 NA | NA     | NA        |           | -0.609 NA | NA        | NA        |        |
| A015923_01 |    | 0.01      | 0.098  | -0.487    | -0.466    | 0.118     | -0.014    | 0.057     | 0.014  |
| A015929_01 | NA | NA        |        | 0.695     | 0.51 NA   | NA        |           | -0.282    | -0.364 |
| A015930_01 | NA | NA        |        | -0.028    | -0.011 NA | NA        |           | -0.183    | -0.195 |
| A015936_01 |    | -0.24     | -0.603 | -0.527    | -0.477    | 1.443     | 0.87      | 1.274     | 1.154  |
| A015938_01 | NA | NA        |        | -1.468 NA |           | -1.624    | -1.211    | -0.453    | -0.817 |
| A015940_01 | NA |           | -0.756 | -0.803    | -0.736 NA | NA        |           | -0.615    | -0.689 |
| A015941_01 |    | 0.781     | 0.287  | -1.213    | -1.079    | -0.012    | -0.26     | -0.007    | -0.005 |
| A015946_01 |    | 0.468     | 0.121  | -0.082    | -0.21     | -0.05     | -0.183    | 0.04      | -0.103 |
| A015948_01 |    | -2.221 NA | NA     | NA        |           | -2.155    | -2.007 NA | NA        |        |
| A015954_01 |    | -0.163    | 0.287  | -0.449 NA |           | 0.143     | -0.089    | 0.358 NA  |        |
| A015955_01 |    | 0.478     | 0.205  | -0.377    | -0.287    | 0.044     | -0.089    | 0.013     | 0.066  |
| A015956_01 |    | 0.117     | 0.197  | 0.021     | 0.027     | 0.049     | 0.187     | 0.1       | 0.086  |
| A015958_01 |    | 0.024     | 0.075  | 0.249     | 0.126     | 0.439     | 0.547     | 0.239     | 0.242  |
| A015959_01 |    | -0.064    | 0.096  | -0.1      | 0.017     | 0.043     | 0.237     | -0.019    | 0.073  |
| A015962_01 |    | -0.928    | -0.518 | 0.664     | 0.566     | -0.038    | -0.028    | -0.017    | 0.176  |
| A015963_01 |    | 0.076     | 0.016  | 0.52      | 0.432     | 0.636     | 0.499     | 0.311     | 0.255  |
| A015967_01 |    | 1.863     | 1.641  | 0.158 NA  |           | -0.125    | -0.03     | 0.284     | 0.296  |
| A015968_01 |    | 0.002     | 0.062  | 0.09      | 0.028     | 0.102     | -0.054    | -0.017    | -0.181 |
| A015972_01 |    | -0.032 NA |        | 0.455     | 0.278     | 0.425 NA  |           | 0.309     | 0.029  |
| A015973_01 |    | -0.489    | -0.223 | 0.261     | 0.219     | 0.339     | 0.324     | -0.062    | -0.036 |
| A015977_01 |    | -1.47     | -0.72  | 0.219     | 0.152     | 0.116     | 0.225     | 0.212     | 0.216  |
| A015979_01 |    | 0.815     | 0.506  | 0.098     | 0.146     | 0.694     | 0.465     | 0.567     | 0.553  |
| A015980_01 |    | 0.127     | 0.299  | -0.959    | -0.924    | -0.409    | -0.343    | -0.554    | -0.566 |
| A015982_01 |    | -1.068    | -1.192 | -0.606    | -0.464    | -0.916    | -1.03     | -0.891    | -0.673 |
| A015984_01 |    | -0.799    | 0.085  | 0.059     | 0.071     | 0.833     | 1.044     | 0.924     | 1.047  |
| A015986_01 | NA | NA        |        | 0.425 NA  | NA        | NA        | NA        |           | 0.14   |
| A015987_01 |    | -0.371    | -0.353 | -0.258    | -0.16     | -0.475    | -0.322    | -0.112    | 0.117  |
| A015988_01 | NA |           | -0.024 | -0.19 NA  |           | -0.117 NA | NA        | NA        |        |
| A015990_01 |    | 0.576     | 0.494  | 0.348     | 0.102     | 0.392     | 0.444     | 0.292     | 0.305  |
| A015995_01 |    | -0.95     | -0.954 | -0.573    | -0.477    | -0.526    | -0.808    | -0.339    | -0.207 |
| A015996_01 |    | -0.017 NA |        | 0.098     | 0.084     | 0.032 NA  |           | 0.18      | 0.206  |
| A015997_01 |    | -0.073    | -0.297 | -0.612    | -0.523    | -0.25     | -0.374    | -0.365    | -0.377 |
| A015998_01 |    | -0.78     | -0.589 | -0.3      | -0.313    | -0.263    | -0.422    | -0.118    | -0.163 |
| A016000_01 |    | -0.709 NA |        | -0.031    | -0.16     | 0.43      | 0.259     | 0.406     | 0.474  |
| A016011_01 |    | -0.316    | -0.252 | 0.464     | 0.159     | 0.116     | 0.076     | 0.023     | -0.107 |
| A016012_01 |    | -0.542    | -0.779 | -0.204    | -0.179    | -0.939    | -0.82     | -0.489    | -0.587 |
| A016019_01 |    | -0.473    | -0.527 | 0.19      | -0.05     | -0.395 NA |           | -0.172    | -0.28  |
| A016020_01 |    | 0.258 NA  |        | -0.109    | -0.06     | 0.03 NA   |           | 0.13      | 0.267  |
| A016021_01 |    | 0.578     | 0.306  | 0.271     | 0.092     | 0.409     | 0.293     | 0.424     | 0.384  |

|            |    |           |          |           |           |           |          |           |        |
|------------|----|-----------|----------|-----------|-----------|-----------|----------|-----------|--------|
| A016022_01 |    | 0.785     | 0.493    | 0.339     | 0.1       | 0.218     | 0.161    | 0.266     | 0.191  |
| A016023_01 |    | -0.74     | -0.617   | 0.237     | 0.176     | -0.61     | -0.603   | -0.524    | -0.571 |
| A016028_01 |    | 1.199     | 0.804    | 0.112     | 0.209     | 0.434     | 0.363    | 0.26      | 0.409  |
| A016029_01 |    | 0.353     | 0.133    | 0.206     | 0.121     | 0.006     | -0.031   | -0.087    | -0.069 |
| A016033_01 | NA | NA        |          | 0.198     | 0.278 NA  | NA        |          | -0.378    | -0.375 |
| A016034_01 | NA | NA        |          | -0.863    | -0.816    | -1.452    | -1.062   | -1.044 NA |        |
| A016035_01 |    | 0.459     | 0.095    | -0.016    | -0.096    | -0.077    | -0.215   | -0.104    | -0.065 |
| A016041_01 |    | -0.596    | -0.179   | -0.123 NA |           | 0.465     | 0.283 NA |           | 0.429  |
| A016044_01 |    | 0.362 NA  |          | -0.532    | -0.364    | -0.511 NA |          | -0.445    | -0.24  |
| A016046_01 |    | -0.349    | -0.645   | -0.32     | -0.242    | -0.991    | -0.933   | -0.392    | -0.404 |
| A016047_01 |    | -0.388    | -0.588   | 0.426     | 0.202     | -0.607    | -0.613   | -0.378    | -0.522 |
| A016048_01 |    | 0.638     | 0.498    | 0.46      | 0.285     | 0.785     | 0.463    | 0.4       | 0.294  |
| A016051_01 |    | 1.149     | 0.934    | -0.301    | -0.405    | 0.289     | 0.329    | 0.787     | 0.783  |
| A016052_01 |    | -0.997    | -0.44    | 0.124     | 0.272     | -0.012    | -0.055   | -0.015    | -0.188 |
| A016055_01 |    | 0.1       | 0.362    | 0.325     | 0.315     | 0.823     | 0.816    | 0.983     | 1.107  |
| A016059_01 |    | -0.132    | 0.126    | 0.285     | 0.227     | 0.081     | 0.174    | 0.112     | 0.219  |
| A016062_01 |    | 0.002     | -0.348   | -0.284    | -0.372    | -0.483    | -0.705   | -0.369    | -0.556 |
| A016066_01 |    | 0.169     | 0.068    | -0.162    | -0.312    | -0.181    | -0.159   | -0.051    | -0.073 |
| A016068_01 | NA | NA        |          | 0.237     | -0.115 NA | NA        |          | 0.207     | -0.301 |
| A016069_01 |    | -0.141    | -0.16    | 0.071     | 0.047     | -0.155    | -0.152   | -0.081    | -0.054 |
| A016070_01 |    | -0.843    | -0.586   | 0.313     | 0.148     | 0.15      | 0.191    | 0.141     | 0.095  |
| A016072_01 | NA |           | -0.458   | 0.422     | 0.327     | 0.018 NA  |          | 0.134     | 0.023  |
| A016073_01 |    | -0.24     | -0.266   | 0.078     | 0.046     | -0.429    | -0.364   | -0.26     | -0.397 |
| A016075_01 | NA | NA        |          | 0.32      | 0.26      | -0.494    | -0.542   | -0.51     | -0.397 |
| A016083_01 |    | -1.194    | -1.549   | -2.246    | -1.576    | -1.797    | -1.656   | -1.077    | -1.132 |
| A016095_01 |    | -1.77     | -1.441   | 0.029     | 0.031     | -1.188    | -1.185   | -0.692    | -0.62  |
| A016099_01 |    | 0.318     | 0.062    | 0.342     | 0.335     | -0.276    | -0.487   | -0.218    | -0.254 |
| A016101_01 |    | -0.256    | -0.065   | 0.041     | 0.097     | 0.124     | 0.127    | 0.142     | 0.163  |
| A016103_01 |    | -0.613    | -0.411   | 0.65      | 0.539     | 0.304     | 0.231    | 0.095     | 0.171  |
| A016104_01 |    | -0.106    | -0.143   | -0.105    | -0.071    | -0.335    | -0.268   | -0.324    | -0.151 |
| A016105_01 |    | -0.447    | -0.256   | -0.191    | -0.171    | -0.706    | -0.657   | -0.231    | -0.252 |
| A016108_01 |    | -0.436    | -0.125   | -0.289    | -0.183    | 0.338     | 0.431    | 0.502     | 0.581  |
| A016113_01 |    | 0.153     | 0.054    | -0.257    | -0.054    | -0.465    | -0.224   | -0.268    | 0.017  |
| A016117_01 |    | -0.275    | -0.075   | -0.143    | -0.033    | -0.73     | -0.279   | -0.132    | 0.103  |
| A016119_01 | NA | NA        |          | 0.306     | 0.116     | -0.361    | -0.572   | -0.188    | -0.354 |
| A016120_01 |    | -0.556    | -0.499   | -0.473    | -0.394    | -0.555 NA |          | -0.383 NA |        |
| A016123_01 |    | 0.212     | 0.008    | -0.185    | -0.318    | -0.079    | 0.036    | 0.149     | 0.351  |
| A016125_01 |    | 0.582     | 0.264    | -0.557    | -0.52     | -0.053    | -0.06    | -0.252    | -0.192 |
| A016126_01 |    | 0.449     | 0.11     | -0.273    | -0.165    | -0.363    | -0.317   | -0.253    | 0.078  |
| A016127_01 |    | 0.376 NA  |          | 0.547     | 0.169     | 0.774 NA  |          | 0.483 NA  |        |
| A016130_01 |    | -0.258    | -0.287   | -0.222    | -0.252    | -0.339    | -0.375   | -0.013    | -0.464 |
| A016131_01 |    | -0.552    | -0.209   | -0.454    | -0.21     | 0.004     | -0.182   | -0.54     | -0.411 |
| A016134_01 | NA | NA        |          | -0.198 NA | NA        | NA        | NA       | NA        | NA     |
| A016139_01 |    | -0.118 NA |          | 0.091     | 0.126     | 0.012 NA  |          | -0.052    | -0.003 |
| A016141_01 |    | -1.894    | -1.079   | -0.086    | -0.112    | 0.473     | 0.467    | 0.581     | 0.48   |
| A016147_01 |    | -0.726    | -0.563   | -1.291    | -1.014    | -0.695    | -0.429   | -0.577    | -0.542 |
| A016148_01 |    | -0.796    | -0.058   | 0.631     | 0.709     | 0.436     | 1.013    | 0.535     | 0.879  |
| A016157_01 |    | -0.595    | -0.017   | 0.331     | 0.337     | -0.023    | 0.061    | 0.222     | 0.313  |
| A016163_01 |    | 0.136     | -0.139   | -0.751    | -0.6      | -0.378    | -0.396   | -0.535    | -0.517 |
| A016169_01 |    | -0.101    | 0.003    | 0.075     | 0.124     | 0.325     | 0.212    | -0.16     | -0.227 |
| A016172_01 |    | 0.482     | 0.239    | 0.195     | 0.14      | 0.25      | 0.303    | 0.275     | 0.219  |
| A016173_01 |    | 0.794     | 0.331    | -0.103 NA |           | 0.483     | 0.507    | 0.29 NA   |        |
| A016174_01 |    | 0.553     | 0.358    | 0.182     | 0.218     | 0.201     | 0.191    | 0.003     | 0.064  |
| A016175_01 |    | -1.234    | -1.881   | -1.419    | -1.148 NA |           | -1.868   | -0.907    | -0.958 |
| A016177_01 |    | 0.239     | 0.012 NA | NA        |           | -0.435 NA | NA       | NA        | NA     |
| A016183_01 |    | 0.574     | 0.298    | 0.342     | 0.414     | 0.115     | -0.067   | -0.095    | 0.054  |
| A016186_01 |    | -0.233    | 0.114    | -0.025    | -0.085    | 0.472     | 0.444    | 0.699     | 0.654  |
| A016187_01 |    | -1.733    | -1.277   | -0.7      | -0.478    | -1.36     | -0.923   | -0.774    | -0.719 |
| A016191_01 |    | 0.524     | 0.24     | -0.044    | 0.023     | 0.03 NA   |          | 0.253     | 0.045  |
| A016192_01 | NA | NA        |          | 0.156     | 0.048 NA  |           | 0.115    | 0.295     | 0.075  |
| A016193_01 |    | -1.56     | -0.905   | -0.751    | -0.678    | 0.315     | 0.717    | -0.124    | 0.019  |
| A016195_01 |    | 0.479     | 0.272    | 0.076     | 0.038     | 0.191     | -0.023   | 0.129     | -0.082 |
| A016197_01 |    | 0.171     | 0.056    | -0.041    | 0.028     | 0.034     | -0.185   | -0.01     | -0.027 |
| A016198_01 |    | -2.101    | -1.646   | -0.136    | -0.01     | -1.172    | -0.88    | -0.483    | -0.566 |
| A016199_01 |    | -1.597    | -0.709   | 0.188     | 0.108     | -0.303    | -0.107   | -0.017    | -0.118 |
| A016201_01 |    | 0.582     | 0.214    | -0.124    | 0.028     | -0.436    | -0.387   | -0.25     | -0.012 |
| A016202_01 | NA |           | -1.022   | 0.474     | 0.38      | -0.3      | -0.149   | 0.034     | -0.256 |
| A016207_01 |    | 0.069     | 0.165    | -0.526    | -0.233    | -0.111    | -0.01    | 0.103     | 0.306  |

|            |        |        |        |        |        |        |        |        |
|------------|--------|--------|--------|--------|--------|--------|--------|--------|
| A016209_01 | -0.934 | -0.686 | -0.394 | -0.228 | -1.02  | -0.69  | -0.465 | -0.487 |
| A016210_01 | -1.412 | -0.786 | 0.429  | 0.323  | 0.587  | 0.488  | 0.506  | 0.317  |
| A016211_01 | 0.857  | 0.784  | 0.276  | 0.275  | 0.159  | 0.228  | 0.152  | 0.456  |
| A016215_01 | 0.335  | 0.15   | -0.669 | -0.591 | -0.069 | -0.015 | -0.056 | 0.062  |
| A016216_01 | NA     | NA     | 0.566  | 0.411  | 0.925  | 0.857  | 0.393  | 0.335  |
| A016221_01 | 0.315  | 0.508  | -0.118 | 0.007  | 0.087  | 0.574  | 0.296  | 0.619  |
| A016222_01 | -0.084 | -0.023 | -0.413 | -0.555 | 0.166  | 0.189  | 0.274  | 0.201  |
| A016226_01 | -1.249 | -0.143 | 0.154  | 0.189  | 0.68   | 0.764  | 0.916  | 0.93   |
| A016227_01 | 0.428  | 0.141  | -0.996 | -0.899 | -0.304 | NA     | -0.611 | -0.678 |
| A016229_01 | -0.007 | 0.46   | 0.542  | 0.612  | 0.346  | 0.862  | 0.523  | 0.645  |
| A016232_01 | 0.281  | NA     | -0.014 | -0.207 | NA     | NA     | NA     | -0.229 |
| A016233_01 | -1.606 | -1.239 | -0.004 | 0.065  | -0.618 | -0.368 | -0.029 | 0.044  |
| A016234_01 | 1.199  | 0.877  | NA     | NA     | 0.384  | 0.327  | -0.443 | NA     |
| A016238_01 | 1.176  | 1.214  | 0.273  | 0.251  | -0.377 | 0.224  | 0.17   | 0.307  |
| A016240_01 | 0.852  | 0.542  | 0.197  | 0.103  | 0.687  | 0.354  | 0.68   | 0.445  |
| A016244_01 | 0.201  | 0.241  | 0.23   | 0.309  | 0.287  | 0.217  | 0.077  | 0.286  |
| A016247_01 | 0.22   | 0.25   | -0.213 | -0.178 | 0.33   | 0.309  | 0.211  | 0.192  |
| A016250_01 | 0.182  | 0.35   | -0.161 | 0.021  | 0.183  | 0.548  | 0.244  | 0.573  |
| A016255_01 | 0.581  | 0.584  | -0.248 | -0.144 | 0.756  | 0.447  | 0.698  | 0.746  |
| A016260_01 | 0.114  | 0.097  | -0.047 | -0.063 | 0.084  | 0.011  | 0.282  | 0.138  |
| A016266_01 | -0.36  | 0.089  | 0.56   | 0.37   | 0.61   | 0.354  | 0.249  | 0.294  |
| A016267_01 | 0.433  | -0.003 | -0.578 | -0.457 | -0.016 | -0.025 | -0.331 | -0.183 |
| A016269_01 | -0.194 | NA     | -0.045 | NA     | 0.291  | 0.22   | 0.333  | 0.331  |
| A016271_01 | 0.027  | 0.106  | 0.127  | 0.02   | 0.085  | 0.129  | 0.102  | -0.067 |
| A016272_01 | -0.077 | 0.002  | 0.527  | 0.262  | 0.478  | 0.514  | 0.287  | 0.293  |
| A016274_01 | NA     | NA     | 0.426  | 0.082  | NA     | NA     | -0.252 | -0.411 |
| A016275_01 | -0.122 | 0.08   | -0.086 | 0.099  | 0.08   | 0.279  | 0.196  | 0.413  |
| A016278_01 | 0.418  | 0.451  | 0.807  | 0.914  | 0.118  | 0.46   | 0.018  | 0.262  |
| A016281_01 | -0.128 | NA     | 0.102  | 0.145  | -0.36  | -0.571 | -0.523 | -0.41  |
| A016282_01 | 0.911  | 0.451  | 0.254  | NA     | 1.023  | 0.593  | 0.518  | 0.426  |
| A016283_01 | -0.195 | -0.497 | -0.13  | -0.021 | -0.614 | -0.717 | -0.368 | -0.479 |
| A016285_01 | -0.65  | -0.709 | -0.465 | -0.397 | -0.649 | -0.636 | -0.288 | -0.332 |
| A016286_01 | NA     | NA     | -0.012 | NA     | 0.263  | NA     | NA     | NA     |
| A016291_01 | 0.434  | 0.118  | -0.235 | -0.121 | -0.075 | -0.219 | -0.208 | 0.026  |
| A016297_01 | 0.222  | 0.1    | 0.053  | 0.234  | -0.043 | 0.263  | 0.141  | 0.475  |
| A016301_01 | NA     | NA     | -0.097 | -0.081 | NA     | NA     | -0.306 | -0.318 |
| A016303_01 | -0.122 | -0.06  | 0.113  | 0.239  | -0.453 | -0.366 | -0.353 | -0.222 |
| A016306_01 | 0.192  | 0.049  | 0.028  | 0.016  | -0.429 | -0.346 | -0.534 | -0.585 |
| A016309_01 | -0.239 | -0.493 | -0.039 | -0.128 | -0.473 | -0.383 | -0.148 | -0.192 |
| A016312_01 | -0.069 | -0.022 | 0.036  | 0.043  | 0.33   | 0.115  | 0.194  | 0.24   |
| A016314_01 | 0.41   | 0.467  | 0.111  | 0.052  | 0.014  | -0.096 | 0.116  | 0.036  |
| A016316_01 | -0.737 | -0.772 | -0.682 | -0.236 | -0.738 | -0.775 | -0.318 | -0.153 |
| A016317_01 | 0.081  | -0.147 | 0.021  | 0.04   | -0.275 | -0.195 | -0.03  | -0.033 |
| A016319_01 | -0.643 | -0.655 | -0.622 | -0.522 | -0.03  | -0.057 | 0.237  | -0.014 |
| A016320_01 | 0.28   | 0.184  | 0.281  | 0.113  | 0.218  | 0.064  | -0.034 | -0.005 |
| A016321_01 | -1.035 | -0.267 | 0.204  | 0.127  | 0.171  | 0.073  | 0.299  | 0.067  |
| A016322_01 | 0.276  | -0.128 | -0.086 | -0.002 | -0.255 | -0.345 | 0.062  | 0.269  |
| A016323_01 | 0.056  | 0.326  | 0.243  | 0.164  | 0.278  | 0.358  | 0.399  | 0.29   |
| A016324_01 | -0.988 | -0.659 | -0.497 | -0.505 | 0.089  | 0.175  | 0.202  | 0.08   |
| A016325_01 | -0.303 | -0.035 | 0.242  | 0.172  | 0.003  | -0.01  | 0.074  | -0.066 |
| A016327_01 | -0.435 | -0.085 | -0.061 | -0.101 | -0.258 | 0.057  | 0.002  | -0.253 |
| A016330_01 | -0.054 | -0.064 | -0.203 | -0.502 | 0.413  | 0.206  | 0.682  | 0.36   |
| A016331_01 | 0.57   | 0.351  | -0.309 | -0.242 | 0.125  | -0.04  | -0.018 | 0.177  |
| A016332_01 | 0.678  | 0.648  | -0.052 | 0.561  | 0.384  | 0.434  | NA     | 0.737  |
| A016333_01 | 0.931  | 0.365  | 0.155  | NA     | 0.475  | NA     | 0.367  | NA     |
| A016335_01 | -0.493 | -0.85  | -0.422 | -0.401 | -1.162 | -1.117 | -0.503 | -0.749 |
| A016337_01 | 0.05   | 0.441  | -1.092 | -0.781 | -0.538 | 0.272  | 0.226  | 0.384  |
| A016340_01 | 0.556  | 0.254  | -0.199 | -0.173 | 0.297  | 0.063  | 0.186  | 0.176  |
| A016344_01 | -0.466 | -0.458 | -0.276 | -0.251 | -0.506 | -0.356 | -0.144 | -0.258 |
| A016347_01 | NA     | NA     | 0.572  | 0.527  | NA     | NA     | -0.457 | -0.463 |
| A016351_01 | 0.5    | 0.501  | 0.334  | 0.291  | 0.466  | 0.392  | 0.376  | 0.299  |
| A016354_01 | -0.033 | -0.103 | -0.049 | -0.192 | 0.227  | 0.135  | 0.068  | -0.077 |
| A016359_01 | -1.001 | -0.694 | -0.025 | -0.175 | -0.845 | -0.545 | -0.324 | -0.538 |
| A016360_01 | -0.108 | 0.077  | -0.259 | -0.175 | -0.261 | 0.066  | -0.276 | -0.168 |
| A016362_01 | -0.854 | -0.741 | -0.191 | -0.288 | -0.056 | -0.413 | 0.21   | 0.101  |
| A016363_01 | -0.94  | -0.715 | -0.168 | -0.198 | -0.283 | -0.316 | -0.171 | -0.246 |
| A016364_01 | -1.777 | -0.706 | -0.003 | -0.145 | 0.633  | 1.102  | 1.228  | 1.17   |
| A016367_01 | -1.45  | -0.716 | 0.554  | 0.328  | -1.081 | -0.417 | -0.112 | -0.145 |

|            |    |           |        |           |           |           |           |           |        |
|------------|----|-----------|--------|-----------|-----------|-----------|-----------|-----------|--------|
| A016368_01 | NA |           | -0.725 | 0.966     | 0.809 NA  |           | 0.323     | 0.053     | 0.18   |
| A016369_01 |    | 0.026     | 0.285  | 0.166     | 0.309     | 0.557     | 0.426     | 0.304     | 0.235  |
| A016370_01 |    | 0.207     | 0.334  | 0.001     | -0.046    | -0.036    | 0.181     | 0.309     | 0.336  |
| A016372_01 |    | -1.303    | -1.177 | -0.841    | -0.861    | -1.344    | -1.078    | -0.129    | -0.155 |
| A016373_01 | NA | NA        |        | 0.546     | 0.412 NA  | NA        |           | -0.109    | -0.321 |
| A016374_01 |    | 0.431     | 0.251  | -0.311    | -0.171    | 0.165     | 0.295     | 0.104     | 0.233  |
| A016376_01 |    | -0.826    | -0.687 | -0.381    | -0.237    | -0.886    | -0.897    | -0.809    | -0.696 |
| A016378_01 |    | 0.493     | 0.155  | 0.221     | 0.085     | 0.172     | 0.049     | 0.102     | -0.12  |
| A016380_01 |    | 0.561     | 0.333  | 0.419     | 0.372     | 0.119 NA  | NA        | NA        |        |
| A016382_01 | NA | NA        |        | 0.329     | 0.201     | -0.314 NA |           | 0.001     | -0.123 |
| A016383_01 |    | -0.35     | -0.133 | 0.04      | 0.01      | -0.127    | 0.079     | -0.23     | -0.126 |
| A016384_01 |    | -0.29     | -0.428 | -0.228    | -0.17     | -0.41     | -0.468    | -0.271    | -0.264 |
| A016385_01 |    | 0.581     | 0.188  | 0.508     | 0.169     | 0.475     | 0.226     | 0.18      | -0.038 |
| A016390_01 |    | -0.579    | -0.06  | 0.187     | 0.203     | -0.238    | -0.373    | -0.333    | -0.251 |
| A016393_01 |    | 0.046     | 0.452  | -0.485    | -0.338    | -0.418    | 0.391     | 0.378     | 0.47   |
| A016394_01 |    | -0.67 NA  |        | 0.041     | -0.034    | 0.064     | -0.06     | 0.053     | 0.05   |
| A016399_01 |    | -0.084    | -0.046 | -0.048    | -0.097    | 0.184     | 0.162     | -0.105    | -0.174 |
| A016402_01 |    | 1.006     | 1.363  | 0.373     | 0.733     | 0.879     | 1.961     | 1.5       | 2.444  |
| A016407_01 |    | -0.234 NA |        | 0.154     | 0.029     | 0.386     | 0.343     | 0.083     | -0.114 |
| A016408_01 | NA | NA        |        | 0.285     | 0.188 NA  | NA        |           | -0.327    | -0.4   |
| A016411_01 |    | -0.214    | 0.329  | 0.671     | 0.678     | 0.149     | 0.405     | 0.294     | 0.412  |
| A016412_01 |    | -0.797 NA |        | 0.463     | 0.087     | -0.283    | -0.338    | 0.042     | -0.21  |
| A016416_01 | NA | NA        |        | 0.735     | 0.42 NA   | NA        |           | 0.305     | 0.195  |
| A016417_01 |    | -0.794    | -0.36  | -0.066    | -0.16     | 0.31      | 0.276     | 0.471     | 0.383  |
| A016419_01 |    | -0.056 NA |        | -0.132    | 0.051     | -0.307 NA |           | -0.026    | 0.312  |
| A016420_01 |    | -1.13     | -1.044 | 0.394     | 0.574     | -1.474    | -1.184    | -1.057    | -0.945 |
| A016421_01 | NA | NA        |        | 0.338     | 0.268 NA  | NA        |           | 0.354     | 0.129  |
| A016422_01 | NA | NA        |        | 0.138     | 0.072 NA  | NA        |           | -0.139    | -0.076 |
| A016423_01 |    | 0.635     | 0.614  | 0.318     | 0.264     | 0.672     | 0.864     | 0.728     | 0.884  |
| A016425_01 |    | -0.376    | 0.094  | 0.541     | 0.536     | 0.085     | 0.028     | -0.045    | 0.012  |
| A016426_01 |    | 0.115     | 0.339  | -0.091    | -0.015    | 0.255     | 0.679     | 0.379     | 0.707  |
| A016431_01 |    | 0.575     | 0.539  | -0.004    | -0.128    | 0.054     | -0.125    | -0.218    | -0.396 |
| A016432_01 |    | -0.77     | -0.321 | 0.18      | 0.122     | -0.098    | -0.202    | -0.096    | -0.177 |
| A016442_01 |    | 0.717     | 0.023  | -0.192 NA | NA        |           | -0.236    | -0.239 NA |        |
| A016443_01 |    | -0.308    | 0.014  | 0.036     | -0.013    | 0.286     | 0.319     | 0.282     | 0.158  |
| A016444_01 | NA | NA        |        | 0.205     | -0.059 NA | NA        |           | -0.116    | -0.384 |
| A016446_01 |    | -2.286    | -1.881 | -2.544    | -2.254    | 1.533     | 1.931     | 1.898     | 1.94   |
| A016447_01 |    | -0.015 NA |        | -0.287    | -0.527    | -0.463 NA |           | -0.347    | -0.765 |
| A016449_01 | NA | NA        |        | 0.294     | 0.237 NA  | NA        |           | -0.022    | -0.051 |
| A016453_01 |    | -2.322    | -1.261 | -0.38     | -0.286    | -0.862    | -0.755    | -0.478    | -0.609 |
| A016456_01 | NA | NA        |        | 0.15      | -0.003 NA | NA        | NA        | NA        |        |
| A016458_01 |    | 0.569     | 0.578  | 0.024     | -0.029    | 0.219     | 0.269     | 0.205     | 0.118  |
| A016459_01 |    | -1.076 NA |        | 0.331     | 0.222     | -0.392 NA |           | 0.057     | -0.128 |
| A016460_01 |    | 0.047     | -0.044 | 0.229 NA  | NA        |           | 0.031 NA  | NA        |        |
| A016462_01 |    | 0.086     | -0.022 | 0.123     | -0.059    | 0.151     | 0.213     | -0.164    | -0.28  |
| A016463_01 |    | 0.157     | 0.496  | -0.192    | -0.212    | 1.06      | 0.859     | 1.083     | 0.973  |
| A016465_01 |    | -0.166    | -0.389 | 0.061     | 0.06      | 0.313     | 0.293     | -0.083    | -0.04  |
| A016466_01 |    | -0.743    | -0.384 | -0.764 NA |           | -0.585    | -0.267    | -0.312    | -0.323 |
| A016472_01 |    | 0.957     | 0.725  | -0.033 NA |           | 0.577     | 0.713     | 0.82      | 0.746  |
| A016473_01 |    | 0.813     | 1.058  | 0.095     | 0.076     | 0.184     | 0.435     | 0.11      | 0.285  |
| A016476_01 |    | 0.835     | 0.834  | -0.377    | -0.505    | -0.261 NA |           | -0.199    | -0.519 |
| A016478_01 |    | -0.569    | -0.276 | 0.145     | 0.073     | -0.142    | -0.304    | -0.398    | -0.435 |
| A016483_01 | NA | NA        |        | 0.339     | 0.246 NA  |           | 0.081     | -0.05     | -0.138 |
| A016484_01 |    | -0.07     | -0.642 | -1.018    | -0.853    | -0.562    | -0.983    | -0.854    | -1.041 |
| A016494_01 |    | 0.887     | 0.447  | -0.159 NA |           | 0.182 NA  | NA        | NA        |        |
| A016502_01 |    | 0.418     | 0.324  | -0.2      | -0.096    | -0.002    | 0.019     | -0.168    | -0.032 |
| A016509_01 |    | 0.722     | 0.528  | -0.236 NA |           | 0.45      | 0.047 NA  |           | 0.185  |
| A016510_01 |    | 0.4       | 0.371  | -0.454    | -0.232    | -0.181    | -0.268    | -0.183    | -0.136 |
| A016511_01 |    | -0.001    | 0.104  | 0.031     | -0.089    | -0.081    | 0.122     | -0.026    | 0.025  |
| A016514_01 | NA | NA        |        | 0.152     | -0.153 NA | NA        | NA        | NA        |        |
| A016516_01 | NA |           | -0.879 | -0.223    | -0.249    | 0.34      | 0.28      | 0.621     | 0.524  |
| A016520_01 | NA | NA        |        | 0.082     | -0.197    | 1.257     | 1.527     | 0.238     | 0.372  |
| A016536_01 |    | 0.7 NA    |        | 0.265     | 0.237     | 0.955     | 1.07      | 0.746     | 0.895  |
| A016553_01 |    | 0.789     | 0.465  | -0.166    | -0.217    | 0.112     | 0.298     | 0.224     | 0.352  |
| A016565_01 |    | 0.579     | 0.018  | -0.095    | -0.084    | 0.104     | 0.007     | 0.057     | -0.065 |
| A016567_01 | NA | NA        |        | 0.048     | -0.072 NA | NA        |           | -0.43     | -0.541 |
| A016575_01 |    | 0.549     | 0.476  | 0.163     | 0.201     | 0.921     | 0.787     | 0.516     | 0.586  |
| A016578_01 |    | 1.554     | 0.923  | -0.561 NA |           | -0.24     | -0.497 NA | NA        |        |

|            |    |        |        |        |        |        |        |        |        |
|------------|----|--------|--------|--------|--------|--------|--------|--------|--------|
| A016580_01 |    | 0.539  | 0.483  | -0.018 | -0.014 | 0.391  | 0.411  | 0.339  | 0.34   |
| A016585_01 |    | -1.693 | -1.189 | 0.425  | 0.354  | -0.764 | -0.736 | -0.579 | -0.562 |
| A016586_01 |    | 0.648  | 0.687  | 0.711  | 0.6    | 0.984  | 0.766  | 0.432  | 0.254  |
| A016588_01 |    | 1.272  | 1.238  | -1.025 | -0.709 | -0.765 | -0.776 | -0.868 | -0.857 |
| A016591_01 | NA |        | 0.217  | 0.099  | 0.045  | 0.207  | 0.177  | 0.11   | 0.105  |
| A016592_01 | NA |        | -0.03  | -0.288 | NA     | 0.375  | 0.405  | 0.482  | 0.564  |
| A016597_01 |    | 0.14   | 0.287  | -0.18  | -0.058 | 0.192  | -0.023 | 0.04   | 0.194  |
| A016605_01 |    | -1.3   | -0.543 | -0.031 | 0.018  | 0.256  | 0.287  | -0.099 | 0.014  |
| A016612_01 |    | 0.513  | 0.335  | 0.45   | 0.297  | 0.639  | 0.466  | 0.336  | 0.149  |
| A016615_01 |    | 1.168  | 1.306  | 0.866  | 0.909  | 0.212  | 0.429  | 0.355  | 0.509  |
| A016618_01 | NA |        | 0.051  | 0.72   | 0.551  | 0.559  | 0.393  | 0.061  | 0.035  |
| A016623_01 |    | 0.076  | -0.01  | -0.009 | 0.087  | -0.126 | -0.099 | -0.03  | 0.324  |
| A016625_01 |    | 0.153  | -0.184 | -0.502 | -0.513 | -0.467 | -0.557 | -0.198 | -0.283 |
| A016628_01 |    | 0.383  | 0.532  | 0.153  | -0.078 | 1.199  | 0.936  | 0.886  | 0.736  |
| A016631_01 |    | 0.256  | 0.052  | -0.038 | 0.007  | -0.129 | -0.32  | -0.257 | -0.141 |
| A016633_01 | NA | NA     |        | 0.167  | -0.019 | NA     |        | -0.142 | -0.098 |
| A016638_01 |    | -0.115 | 0.267  | 0.184  | 0.2    | -0.001 | 0.037  | -0.035 | 0.067  |
| A016644_01 |    | 0.178  | 0.075  | -0.194 | -0.429 | 0.434  | 0.12   | 0.355  | 0.113  |
| A016645_01 | NA |        | 0.137  | 0.281  | 0.019  | 0.475  | 0.207  | 0.278  | 0.098  |
| A016649_01 |    | -0.5   | NA     | 0.453  | 0.285  | 0.275  | 0.221  | 0.283  | 0.126  |
| A016650_01 |    | 0.173  | 0.132  | -0.524 | -0.496 | 0.06   | -0.095 | -0.261 | -0.221 |
| A016651_01 |    | -0.608 | -0.234 | -0.198 | -0.394 | 0.408  | 0.245  | 0.668  | 0.567  |
| A016652_01 |    | 0.195  | 0.36   | 0.457  | 0.291  | 1.011  | 0.763  | 0.65   | 0.512  |
| A016656_01 |    | 0.199  | 0.281  | 0.265  | 0.169  | 0.391  | 0.325  | 0.335  | 0.239  |
| A016658_01 | NA | NA     |        | 0.593  | 0.225  | NA     |        | 0.026  | -0.433 |
| A016661_01 | NA | NA     |        | 0.36   | 0.242  | -0.317 | NA     | -0.083 | -0.145 |
| A016662_01 |    | -0.674 | NA     | -0.015 | -0.142 | -0.464 | -0.394 | -0.423 | -0.357 |
| A016664_01 |    | 0.205  | -0.006 | -0.524 | NA     | -0.298 | -0.446 | 0.028  | 0.071  |
| A016665_01 | NA | NA     |        | -0.107 | -0.116 | NA     |        | -0.331 | -0.457 |
| A016673_01 |    | -0.386 | -0.381 | -1.099 | -1.051 | -0.765 | -0.856 | -0.847 | -1.087 |
| A016676_01 |    | -0.843 | NA     | -1.44  | -1.362 | NA     |        | -1.122 | NA     |
| A016682_01 |    | 0.375  | 0.535  | -0.207 | -0.241 | 0.422  | 0.224  | 0.436  | 0.412  |
| A016696_01 |    | 0.35   | 0.348  | 0.447  | 0.164  | 0.289  | 0.225  | 0.447  | 0.12   |
| A016697_01 |    | 0.126  | -0.112 | 0.207  | 0.034  | -0.022 | -0.143 | 0.119  | -0.003 |
| A016703_01 |    | 0.432  | 0.332  | 0.345  | 0.208  | 0.511  | 0.638  | 0.498  | 0.455  |
| A016705_01 |    | 0.867  | 0.426  | 0.471  | 0.238  | -0.112 | -0.065 | NA     | NA     |
| A016715_01 |    | 0.351  | 0.256  | -0.076 | 0.01   | -0.006 | 0.397  | 0.039  | 0.154  |
| A016721_01 |    | 0.707  | 0.325  | -0.516 | NA     | -0.369 | NA     | NA     | NA     |
| A016723_01 | NA | NA     |        | 0.098  | -0.101 | NA     | NA     | NA     | -0.568 |
| A016728_01 |    | 0.404  | -0.02  | -0.467 | -0.621 | 0.462  | 0.226  | 0.474  | 0.318  |
| A016731_01 |    | 0.613  | 0.766  | 0.377  | 0.342  | 0.731  | 0.838  | 0.507  | 0.555  |
| A016735_01 |    | 0.391  | 0.341  | -0.357 | -0.276 | 0.706  | 0.41   | 0.388  | 0.355  |
| A016736_01 |    | 0.129  | -0.437 | NA     | NA     | -0.311 | -0.685 | NA     | NA     |
| A016738_01 |    | 0.634  | 0.482  | 0.007  | 0.004  | 0.889  | 0.681  | 0.685  | 0.439  |
| A016740_01 |    | -0.73  | -0.498 | 0.47   | 0.134  | 0.117  | 0.025  | 0.2    | -0.101 |
| A016742_01 |    | 0.07   | 0.041  | -0.431 | -0.347 | -0.252 | -0.17  | -0.145 | -0.065 |
| A016750_01 |    | -0.466 | NA     | 0.581  | 0.363  | -0.6   | NA     | -0.233 | -0.161 |
| A016751_01 |    | 0.178  | 0.025  | -0.109 | -0.06  | -0.591 | -0.636 | -0.386 | -0.325 |
| A016752_01 |    | -0.126 | -0.084 | 0.137  | -0.106 | -0.072 | -0.045 | 0.286  | 0.02   |
| A016754_01 | NA | NA     | -1.41  | NA     | NA     | NA     | NA     | NA     | NA     |
| A016756_01 |    | 0.301  | 0.174  | 0.229  | 0.173  | 0.299  | 0.17   | 0.193  | 0.072  |
| A016761_01 |    | -0.2   | -0.518 | -0.474 | -0.316 | -1.274 | -1.054 | -1.276 | -1.234 |
| A016762_01 |    | 0.976  | 0.842  | 0.449  | 0.358  | 0.068  | 0.026  | 0.042  | -0.067 |
| A016767_01 |    | 0.824  | 0.402  | -0.166 | -0.047 | 0.076  | -0.04  | 0.019  | 0.032  |
| A016786_01 | NA | NA     |        | 0.196  | -0.182 | NA     |        | 0.055  | -0.16  |
| A016794_01 | NA | NA     |        | 0.373  | 0.186  | NA     |        | 0.021  | NA     |
| A016797_01 |    | 0.398  | 0.432  | -0.055 | -0.023 | 0.363  | 0.322  | 0.282  | 0.137  |
| A016803_01 |    | 0.109  | -0.152 | -0.001 | NA     | -0.161 | NA     | NA     | NA     |
| A016804_01 |    | 0.191  | 0.231  | 0.346  | 0.177  | 0.04   | 0.053  | -0.048 | -0.088 |
| A016809_01 |    | -1.244 | NA     | 0.388  | 0.203  | 0.263  | 0.219  | 0.233  | 0.064  |
| A016812_01 |    | 0.397  | 0.083  | -0.3   | -0.19  | 0.419  | 0.307  | 0.235  | 0.343  |
| A016813_01 | NA | NA     |        | -0.227 | -0.245 | NA     |        | 0.373  | 0.508  |
| A016817_01 |    | -0.147 | -0.063 | 0.403  | 0.239  | -0.089 | -0.083 | 0.004  | 0.007  |
| A016820_01 |    | -0.397 | -0.029 | 0.01   | -0.121 | -0.522 | -0.525 | -0.346 | -0.583 |
| A016827_01 |    | -0.046 | -0.014 | -0.176 | -0.228 | 0.372  | 0.303  | 0.153  | 0.37   |
| A016830_01 |    | -0.844 | -0.37  | 0.212  | 0.11   | 0.525  | 0.47   | 0.406  | 0.508  |
| A016832_01 |    | 0.837  | 0.561  | 0.206  | NA     | 0.282  | NA     | NA     | 0.2    |
| A016836_01 |    | 0.944  | 0.822  | 0.407  | 0.15   | 0.482  | 0.384  | 0.299  | 0.276  |

|            |    |           |           |           |           |           |           |        |        |
|------------|----|-----------|-----------|-----------|-----------|-----------|-----------|--------|--------|
| A016838_01 |    | 0.029     | 0.106     | -0.11     | -0.007    | -0.354    | 0.047     | 0.2    | 0.417  |
| A016839_01 |    | 0.211     | 0.588     | 0.714     | 0.486     | 0.691     | 0.345     | 0.169  | 0.126  |
| A016845_01 | NA | NA        |           | 0.489     | 0.413 NA  | NA        |           | -0.52  | -0.383 |
| A016847_01 |    | 0.075     | 0.028     | 0.128     | -0.167    | 0.237     | 0.19      | 0.042  | 0.07   |
| A016851_01 | NA | NA        |           | 0.445     | 0.429 NA  | NA        |           | -0.003 | 0.042  |
| A016853_01 |    | 0.031     | 0.287     | -0.567    | -0.25     | -0.175    | 0.159     | -0.038 | 0.056  |
| A016860_01 |    | -0.403 NA |           | -1.121 NA | NA        | NA        | NA        | NA     | NA     |
| A016868_01 | NA | NA        |           | 0.089     | -0.03     | 0.235 NA  |           | 0.567  | 0.374  |
| A016869_01 |    | -0.293    | -0.189    | -0.338    | -0.373    | -0.409    | -0.393    | -0.226 | -0.297 |
| A016873_01 |    | 0.369     | -0.038    | -0.072    | -0.206    | -0.107    | -0.218    | -0.038 | -0.281 |
| A016875_01 |    | 0.08      | 0.126     | 0.216     | 0.014     | 0.037     | -0.127    | 0.104  | 0.246  |
| A016880_01 |    | -0.768    | -0.499    | -0.208    | -0.185    | -0.253 NA |           | 0.387  | 0.255  |
| A016883_01 |    | 0.546 NA  |           | 0.326     | 0.144 NA  | NA        | NA        |        | -0.128 |
| A016884_01 |    | -0.28     | -0.368    | -0.35     | -0.344    | -0.28     | -0.335    | 0.074  | -0.053 |
| A016886_01 |    | -0.179    | -0.258 NA |           | 0.309     | -0.923    | -0.827 NA | NA     |        |
| A016888_01 |    | 0.798     | 0.771     | 0.003     | 0.009     | -0.053 NA |           | 0.088  | 0.281  |
| A016894_01 | NA | NA        |           | 0.511     | 0.22 NA   | NA        |           | 0.123  | -0.221 |
| A016897_01 |    | 0.607     | 0.31      | 0.124     | 0.121     | 0.267     | 0.328     | 0.153  | 0.015  |
| A016898_01 |    | 0.505     | 0.568     | 0.492     | 0.504     | 0.605     | 0.843     | 0.653  | 0.693  |
| A016900_01 |    | 0.423     | 0.021     | -0.345    | -0.342    | -0.363    | -0.277    | -0.209 | -0.268 |
| A016901_01 |    | 0.253     | -0.088    | -0.115    | -0.211    | 0.1       | -0.196    | 0.021  | -0.184 |
| A016902_01 |    | 0.054     | -0.174    | -0.055    | -0.33     | 0.242     | 0.038     | 0.365  | 0.219  |
| A016904_01 |    | 0.855     | 0.787     | 0.332     | 0.289     | 0.68      | 0.6       | 0.368  | 0.362  |
| A016905_01 | NA | NA        |           | -0.201    | -0.196 NA | NA        |           | -0.681 | -0.632 |
| A016907_01 |    | 0.224     | -0.088    | -1.009    | -0.853    | -0.533    | -0.678 NA |        | -0.553 |
| A016909_01 |    | 0.28      | -0.109    | -0.009    | 0.005     | 0.259     | 0.189     | 0.08   | -0.105 |
| A016913_01 |    | -0.299    | 0.369     | 0.086     | -0.034    | -0.146    | -0.074    | -0.009 | -0.127 |
| A016914_01 |    | -0.652    | -0.681    | -0.231    | -0.193    | -0.672    | -0.726    | -0.283 | -0.392 |
| A016915_01 |    | 0.596     | 0.347     | 0.048     | -0.092    | 0.141     | 0.07      | 0.106  | -0.042 |
| A016922_01 |    | -0.865    | -1.325    | -1.335    | -1.06     | -1.397    | -1.165    | -1.02  | -0.833 |
| A016923_01 |    | -0.657    | -0.4      | -0.133    | -0.1      | -0.061    | -0.217    | -0.154 | -0.028 |
| A016924_01 |    | -1.414    | -1.18     | -0.106    | -0.105    | -1.059    | -0.734    | -0.448 | -0.485 |
| A016925_01 |    | -0.721    | 0.048     | 0.268     | 0.34      | 0.794     | 0.51      | -0.008 | 0.081  |
| A016926_01 |    | -0.687    | -0.375    | -0.165    | 0.112     | -0.294    | -0.196    | -0.43  | -0.157 |
| A016929_01 |    | -0.216    | -0.357    | -0.225    | -0.272    | -0.156    | -0.543    | -0.102 | -0.243 |
| A016930_01 |    | 0.06      | 0.469     | 0.45      | 0.353     | 0.25      | 0.564     | 0.424  | 0.518  |
| A016931_01 |    | -0.339    | -0.084    | -0.333    | -0.274    | 0.434     | 0.712     | 0.701  | 0.943  |
| A016933_01 |    | 0.312     | 0.392     | 0.028     | 0.089     | -0.032    | 0.01      | 0.094  | 0.136  |
| A016936_01 |    | -0.381    | -0.093    | -0.038    | 0.215     | -0.659    | -0.242    | -0.788 | -0.323 |
| A016937_01 |    | -1.551    | -1.473    | 0.133     | 0.038     | -0.533    | -0.371    | -0.289 | -0.302 |
| A016941_01 |    | -0.284    | -0.1      | -0.226    | -0.199    | -0.226    | -0.005    | -0.036 | -0.051 |
| A016943_01 |    | 0.764     | 0.481     | 0.232     | 0.224     | 0.565     | 0.375     | -0.001 | -0.022 |
| A016946_01 |    | -0.345    | -0.32     | -0.04     | -0.029    | 0.036     | 0.061     | 0.071  | 0.232  |
| A016947_01 |    | -0.067    | -0.04     | -0.328    | -0.432    | -0.102    | -0.164    | 0.171  | 0.07   |
| A016949_01 |    | 0.028     | 0.199     | -0.691    | -0.52     | 0.137     | 0.004     | 0.554  | 0.477  |
| A016950_01 |    | -0.747    | -0.577    | -0.829    | -0.809    | -0.428    | -0.399    | -0.21  | -0.666 |
| A016951_01 |    | 0.914     | 0.917     | -0.07     | 0.014     | 0.689     | 0.548     | 0.813  | 1.036  |
| A016952_01 |    | -1.016 NA |           | -0.11     | -0.192    | 0.095     | 0.128     | 0.383  | 0.238  |
| A016954_01 | NA | NA        |           | -0.097 NA | NA        | NA        |           | -0.064 | 0.025  |
| A016955_01 |    | 0.637     | 0.505     | 0.718     | 0.403     | 0.438     | 0.26      | 0.291  | 0.24   |
| A016956_01 |    | -0.455 NA |           | 0.761     | 0.622     | 0.303     | 0.475     | 0.267  | 0.188  |
| A016959_01 | NA | NA        |           | 0.113     | 0.006 NA  | NA        |           | -0.043 | -0.262 |
| A016960_01 | NA | NA        |           | 0.185     | -0.057    | 0.677     | 0.575     | 0.776  | 0.475  |
| A016966_01 |    | -0.503    | -0.354    | -0.234    | -0.172    | -0.234    | -0.307    | -0.288 | -0.265 |
| A016967_01 | NA |           | 0.548     | -0.573    | -0.482 NA |           | 0.391     | 0.276  | 0.421  |
| A016969_01 |    | 0.268     | 0.416     | -0.052    | -0.062    | 0.803     | 0.686     | 0.536  | 0.399  |
| A016971_01 | NA | NA        |           | 0.625     | 0.526     | 1.528     | 1.328     | 1.026  | 1.127  |
| A016976_01 |    | -0.134 NA |           | -0.178    | -0.451    | 0.291     | -0.016    | -0.059 | -0.511 |
| A016977_01 |    | -0.671    | -0.952    | -0.49     | -0.688    | -0.627    | -0.674    | -0.328 | -0.624 |
| A016978_01 |    | -0.328    | -0.059    | 0.199     | 0.194     | 0.089     | 0.165     | 0.392  | 0.234  |
| A016979_01 |    | -0.039    | -0.429    | -0.529    | -0.464    | -0.519    | -0.732    | -0.348 | -0.178 |
| A016980_01 | NA | NA        |           | 0.811     | 0.714     | -0.207 NA |           | -0.567 | -0.613 |
| A016984_01 |    | -0.339    | -0.358    | -0.482    | -0.405    | -0.267    | -0.236    | 0.097  | -0.002 |
| A016987_01 |    | 0.046     | -0.098    | 0.13      | 0.176     | -0.023    | -0.103    | -0.23  | -0.194 |
| A016991_01 |    | 0.61      | 0.443     | -0.269    | -0.277    | -0.094    | -0.174    | 0.033  | 0.11   |
| A016997_01 |    | 0.31      | 0.325     | -0.337 NA |           | 0.309     | 0.177     | 0.631  | 0.692  |
| A017000_01 |    | 0.142     | 0.04      | 0.105     | 0.001     | 0.436     | 0.202     | 0.263  | 0.073  |
| A017002_01 |    | -0.517    | -0.142    | 0.143     | 0.017     | 0.269     | 0.154     | 0.201  | 0.028  |

|            |    |           |        |           |           |           |        |           |        |
|------------|----|-----------|--------|-----------|-----------|-----------|--------|-----------|--------|
| A017003_01 |    | 0.692     | 0.702  | 0.207     | 0.42      | 0.379     | 0.592  | 0.195     | 0.477  |
| A017004_01 |    | -0.155 NA |        | 0.432     | 0.297     | 0.117 NA  |        | 0.031     | -0.097 |
| A017008_01 | NA | NA        |        | 0.196     | 0.035 NA  | NA        |        | -0.028    | -0.049 |
| A017010_01 |    | -1.244    | -1.25  | -0.503    | -0.464    | -1.022    | -0.992 | -0.719    | -0.68  |
| A017012_01 |    | -0.142    | -0.151 | 0.243     | 0.175     | 0.261     | 0.044  | 0.21      | -0.001 |
| A017013_01 |    | -0.015    | 0.085  | 0.001     | 0.092     | -0.033    | 0.176  | 0.177     | 0.195  |
| A017015_01 |    | -0.816    | -0.743 | -0.184    | -0.126    | -1.004    | -0.999 | -0.605    | -0.617 |
| A017016_01 |    | -1.503    | -1.554 | -1.194    | -0.89     | -1.403    | -1.463 | -1.168    | -1.018 |
| A017020_01 | NA | NA        |        | 0.501     | 0.313     | 0.419 NA  |        | 0.467     | 0.185  |
| A017021_01 |    | -0.084    | -0.025 | 0.172     | -0.044    | 0.356     | -0.174 | 0.254     | 0.157  |
| A017022_01 |    | -0.239 NA |        | -0.324    | -0.498    | -0.616 NA |        | -0.43     | -0.796 |
| A017024_01 |    | -0.386    | -0.146 | 0.081     | -0.004    | 0.252     | 0.138  | 0.338     | 0.152  |
| A017025_01 |    | 0.552 NA  |        | -0.056 NA | NA        | NA        |        | -0.082 NA |        |
| A017026_01 |    | -0.939    | -0.414 | -0.172    | -0.086    | -0.959    | -0.669 | -0.675    | -0.674 |
| A017028_01 |    | 0.141     | -0.339 | -0.277    | -0.299    | -0.284    | -0.62  | -0.228    | -0.311 |
| A017031_01 |    | -0.62     | -0.548 | -0.016    | -0.208    | -0.247    | -0.291 | -0.063    | -0.162 |
| A017032_01 |    | 0.189     | 0.174  | 0.244     | 0.32      | -0.001    | 0.117  | -0.172 NA |        |
| A017034_01 |    | 0.598     | 0.559  | -0.094    | 0.067     | 0.365     | 0.532  | 0.307     | 0.378  |
| A017035_01 | NA | NA        |        | 0.255 NA  |           | 0.619     | 0.394  | 0.509     | 0.568  |
| A017036_01 |    | -0.141    | -0.257 | 0.132     | 0.05      | 0.185     | 0.161  | 0.119     | 0.113  |
| A017037_01 |    | -0.745    | -0.347 | -0.008    | -0.043    | 0.023     | -0.101 | -0.107    | 0.051  |
| A017038_01 |    | -2.975    | -3.33  | -2.91     | -2.317    | -3.014    | -1.818 | -2.005    | -2.253 |
| A017040_01 | NA | NA        |        | 0.201     | 0.245     | -0.353 NA |        | -0.036    | 0.033  |
| A017041_01 |    | -0.796    | -0.288 | -0.876    | -0.734    | -0.563    | -0.223 | 0.089     | 0.103  |
| A017042_01 |    | -0.441    | -0.809 | 0.517     | 0.262     | -1.041    | -1.267 | -0.93     | -1.204 |
| A017044_01 |    | -1.387    | -0.992 | 0.343     | 0.344     | 0.279     | 0.301  | 0.482     | 0.595  |
| A017045_01 |    | -0.072 NA |        | -0.107    | -0.038    | 0.199     | 0.066  | -0.114    | 0.165  |
| A017046_01 |    | 0.932     | 0.814  | 0.429     | 0.296     | 0.79      | 0.606  | 0.66      | 0.64   |
| A017048_01 |    | -1.014    | -1.065 | -0.949    | -0.872    | -1.2      | -1.089 | -0.658    | -0.756 |
| A017049_01 |    | -0.378    | -0.592 | -0.675    | -0.622    | -0.83     | -0.928 | -0.554    | -0.607 |
| A017051_01 | NA | NA        |        | 0.118     | 0.127     | 0.001 NA  |        | -0.022 NA |        |
| A017053_01 |    | -0.434    | -0.299 | -0.295    | -0.189    | -0.379    | -0.505 | -0.062    | -0.16  |
| A017056_01 | NA | NA        |        | -0.094    | -0.028 NA | NA        | NA     | NA        |        |
| A017057_01 | NA | NA        |        | 0.036     | 0.05 NA   | NA        |        | 0.282     | 0.516  |
| A017059_01 |    | -0.498    | 0.272  | -0.412    | -0.219    | -0.178    | 0.52   | 0.34      | 0.512  |
| A017063_01 |    | -0.19     | -0.491 | -0.836    | -0.758    | -0.894    | -0.893 | -0.76 NA  |        |
| A017064_01 |    | 0.418     | 0.454  | 0.134     | -0.037    | 0.338     | 0.278  | 0.359     | 0.419  |
| A017068_01 |    | -0.488    | -0.04  | 0.119     | 0.02      | -0.438    | -0.16  | 0.054     | -0.148 |
| A017069_01 |    | 0.764     | 0.923  | 0.334     | 0.345     | 0.736     | 1.155  | 0.698     | 1.096  |
| A017071_01 |    | 0.436 NA  |        | 0.459     | 0.326 NA  | NA        |        | -0.183    | -0.212 |
| A017072_01 |    | -2.203    | -0.989 | 0.419     | 0.348     | -0.522    | -0.097 | 0.27      | 0.194  |
| A017073_01 |    | 0.326     | 0.545  | 0.177     | 0.221     | 0.339     | 0.527  | 0.508     | 0.49   |
| A017075_01 |    | -0.404    | -0.17  | -0.327    | -0.27     | -0.444    | -0.389 | -0.064    | -0.117 |
| A017079_01 |    | 0.02      | 0.102  | 0.094     | -0.146    | 0.062     | 0.037  | 0.151     | -0.182 |
| A017080_01 |    | -0.162    | -0.019 | 0.074     | -0.161    | -0.041    | -0.064 | 0.396     | 0.113  |
| A017083_01 |    | 0.115     | -0.22  | -0.215    | -0.367    | -0.141    | -0.426 | -0.353    | -0.252 |
| A017087_01 |    | -0.182    | -0.029 | -0.211    | -0.059    | -0.459    | -0.298 | -0.387    | -0.4   |
| A017088_01 |    | -1.116    | -1.514 | -1.128    | -1.079    | -1.197    | -1.428 | -0.839    | -1.134 |
| A017091_01 | NA | NA        |        | 0.267     | -0.085 NA | NA        |        | -0.105    | -0.467 |
| A017092_01 |    | -1.513    | -2.208 | -1.85     | -1.603    | -1.923    | -1.606 | -1.063    | -1.399 |
| A017095_01 |    | -0.585 NA |        | -0.449 NA | NA        | NA        |        | -0.671 NA |        |
| A017096_01 | NA |           | -0.462 | 0.481     | 0.272 NA  |           | 0.123  | 0.483     | 0.314  |
| A017098_01 |    | -1.666    | -0.59  | 0.034     | 0.123     | -0.964    | -0.107 | -0.181    | -0.11  |
| A017099_01 |    | -0.824    | -0.32  | 0.287     | 0.326     | -0.007    | -0.12  | -0.1      | -0.101 |
| A017100_01 |    | 0.049     | 0.142  | 0.408     | 0.27      | 0.46      | 0.238  | 0.317     | 0.234  |
| A017108_01 | NA | NA        |        | -0.101    | -0.108 NA | NA        |        | -0.45     | -0.639 |
| A017114_01 |    | -0.115    | 0.025  | -0.2      | -0.27     | 0.213     | 0.161  | 0.438     | 0.412  |
| A017115_01 | NA | NA        |        | 0.223     | 0.169 NA  | NA        |        | 0.062     | 0.172  |
| A017116_01 |    | -2.01     | -1.543 | -0.82     | -0.606    | -0.791    | -0.845 | -0.684    | -0.932 |
| A017117_01 |    | 0.213 NA  |        | -1.883    | -1.425 NA | NA        |        | -0.881    | -0.946 |
| A017120_01 |    | -0.845    | -0.194 | 0.042     | 0.097     | -0.086    | 0.325  | 0.277     | 0.36   |
| A017122_01 |    | 0.391     | 0.575  | 0.368     | 0.189     | 1.085     | 0.677  | 0.488     | 0.407  |
| A017127_01 |    | 0.547     | 0.495  | -0.305    | -0.092    | 0.437     | 0.622  | 0.323     | 0.733  |
| A017128_01 |    | 0.065     | 0.29   | 0.266     | 0.27      | 0.653     | 0.837  | 0.698     | 0.671  |
| A017130_01 |    | -1.023    | -0.653 | 0.263     | -0.003    | -0.578    | -0.318 | 0.04      | -0.212 |
| A017135_01 |    | -0.212    | 0.163  | 0.17      | 0.251     | 0.562     | 0.654  | 1.035     | 1.037  |
| A017138_01 |    | -0.589    | -0.117 | -0.263    | -0.181    | 0.191     | 0.03   | 0.198     | 0.253  |
| A017139_01 |    | 0.174     | 0.289  | -0.542    | -0.394    | -0.155    | 0.028  | 0.186     | 0.28   |

|            |    |          |           |           |           |           |           |           |        |
|------------|----|----------|-----------|-----------|-----------|-----------|-----------|-----------|--------|
| A017140_01 |    | 0.498    | 0.445     | -0.427    | -0.172    | 0.266     | 0.53      | 0.202     | 0.526  |
| A017142_01 |    | 0.042 NA |           | -0.123    | 0.004     | -0.153    | 0.055     | -0.285    | -0.223 |
| A017149_01 |    | 0.04     | -0.173    | -0.309 NA |           | -0.233    | -0.305    | -0.336    | -0.345 |
| A017151_01 | NA | NA       |           | 0.512     | 0.377 NA  | NA        | NA        | NA        |        |
| A017153_01 | NA | NA       |           | 0.878     | 0.589 NA  | NA        |           | 0.238     | 0.196  |
| A017160_01 |    | -0.347   | 0.369     | -0.077    | 0.036     | 0.203     | 0.593     | 0.475     | 0.668  |
| A017162_01 |    | 0.087    | 0.304     | 0.042     | 0.171     | 0.185     | 0.243     | 0.071     | 0.208  |
| A017173_01 | NA | NA       |           | -0.355 NA | NA        | NA        | NA        | NA        |        |
| A017174_01 | NA |          | 0.017     | 0.082     | 0.135     | 0.073     | 0.111     | 0.056     | 0.015  |
| A017178_01 |    | 0.305    | 0.357     | 0.411     | 0.274     | 0.42      | 0.394     | 0.255     | 0.374  |
| A017185_01 |    | 0.304 NA |           | -0.587    | -0.883    | -1.024    | -0.796    | -0.846    | -1.127 |
| A017192_01 |    | 0.06     | 0.081     | 0.016     | 0.11      | -0.121    | 0.102     | 0.118     | 0.313  |
| A017194_01 |    | -0.308   | -0.576    | 0.287     | 0.186     | -0.622    | -0.608    | -0.388    | -0.654 |
| A017195_01 | NA | NA       |           | -1.026    | -1.039 NA | NA        |           | -1.877 NA |        |
| A017207_01 |    | -0.908   | -0.725    | 0.257     | 0.171     | -1.024    | -0.88     | -0.687    | -0.727 |
| A017227_01 |    | -0.494   | -0.463    | -0.129    | -0.115    | -0.568    | -0.558    | -0.207    | -0.275 |
| A017229_01 |    | 0.288    | 0.002     | 0.13      | 0.104     | -0.452    | -0.649    | -0.05     | -0.059 |
| A017235_01 |    | 0.057    | -0.102    | 0.003     | 0.158     | -0.501    | -0.506    | -0.612    | -0.448 |
| A017240_01 |    | 0.27     | 0.212     | 0.009     | 0.032     | 0.062     | 0.025     | 0.098     | -0.028 |
| A017247_01 |    | 0.59     | 0.451     | 0.201 NA  |           | 0.68      | 0.759 NA  |           | 1.034  |
| A017250_01 |    | -2.024   | -0.999    | -0.195    | -0.04     | -0.664    | -0.245    | -0.772    | -0.416 |
| A017257_01 |    | 0.367    | 0.268     | 0.088     | 0.191     | 0.008     | 0.062     | -0.018    | 0.16   |
| A017258_01 |    | -0.194   | -0.22     | 0.117     | 0.003     | -0.343    | -0.372    | -0.265    | -0.386 |
| A017259_01 |    | 0.102    | -0.213    | 0.225     | 0.237     | -0.609    | -0.698    | -0.449    | -0.479 |
| A017261_01 | NA | NA       |           | 0.065     | -0.071    | -0.246    | -0.448    | -0.16     | -0.163 |
| A017265_01 |    | 0.214    | -0.065    | 0.188     | 0.133     | 0.26      | 0.182     | 0.067     | -0.144 |
| A017266_01 |    | 0.443    | 0.292     | 0.254 NA  |           | 0.309 NA  | NA        |           | 0.255  |
| A017267_01 |    | 0.031    | -0.085    | -0.059    | -0.127    | 0.325     | 0.185     | 0.271     | 0.192  |
| A017268_01 |    | 0.047    | -0.048    | -0.256    | -0.269    | -0.122    | -0.166    | -0.279    | -0.496 |
| A017274_01 |    | -0.459   | -0.248    | -0.361    | -0.412    | -0.389    | -0.297    | -0.27     | -0.273 |
| A017277_01 |    | -0.221   | 0.23      | -0.019    | 0.091     | 0.65      | 0.629     | 0.417     | 0.541  |
| A017279_01 |    | 0.639    | 0.405     | -0.453    | -0.534    | 0.271     | 0.135     | -0.066    | -0.35  |
| A017280_01 |    | -0.157   | 0.016     | -0.35     | -0.37     | 0.082     | 0.062     | 0.281     | 0.192  |
| A017284_01 |    | -1.116   | -0.835    | -0.478    | -0.347    | 0.535     | 0.867     | 0.837     | 0.9    |
| A017285_01 |    | 0.239 NA |           | -0.017    | -0.027    | -0.185 NA |           | -0.101    | -0.254 |
| A017289_01 |    | -0.144   | -0.177    | 0.233     | 0.137     | 0.16      | 0.082     | 0.226     | -0.018 |
| A017293_01 | NA | NA       |           | -0.319    | -0.259    | -0.649 NA |           | -0.656    | -0.809 |
| A017305_01 |    | 0.189    | 0.287     | 0.213     | 0.017     | 0.878     | 0.334     | 0.08      | -0.099 |
| A017306_01 |    | -0.309   | 0.128     | 0.073     | 0.11      | 0.726     | 0.527     | 0.503     | 0.582  |
| A017307_01 |    | -0.229   | -0.199    | 0.506     | 0.291     | -0.251 NA |           | 0.081     | 0.086  |
| A017308_01 | NA | NA       |           | -0.21 NA  | NA        | NA        |           | 0.298 NA  |        |
| A017311_01 |    | -0.51    | -0.799    | -0.187    | -0.255    | -0.153    | -0.346    | 0.249     | 0.083  |
| A017312_01 |    | -0.442   | -0.245    | 0.146     | 0.249     | -0.178    | -0.226    | -0.205    | 0.031  |
| A017314_01 | NA | NA       |           | 0.263     | 0.163 NA  | NA        |           | -0.379    | -0.428 |
| A017315_01 |    | 0.053    | 0.166     | 0.535     | 0.221     | 0.534     | 0.308     | 0.439     | 0.354  |
| A017316_01 |    | 0.138    | 0.161     | 0.17      | 0.044     | 0.34      | 0.346     | 0.211     | 0.17   |
| A017321_01 |    | -0.092   | 0.081     | -0.141    | -0.263    | 0.009     | -0.068    | -0.036    | -0.027 |
| A017326_01 |    | -0.126   | -0.301    | -0.401    | -0.397    | -0.37     | -0.189    | 0.03      | 0.224  |
| A017327_01 | NA | NA       |           | 0.103     | -0.048 NA |           | -0.024    | 0.058     | 0.108  |
| A017328_01 | NA |          | -0.225    | -0.009 NA |           | 0.141     | -0.238    | 0.115     | 0.024  |
| A017331_01 | NA |          | -0.516    | -0.208    | -0.269    | -0.325    | -0.572    | -0.443    | -0.671 |
| A017335_01 |    | -0.984   | -1.275    | -0.952    | -0.831    | 0.741     | 0.352     | 0.364     | 0.116  |
| A017340_01 |    | 0.794    | 0.716     | 0.26      | 0.133 NA  |           | 0.232 NA  |           | 0.149  |
| A017341_01 |    | -0.45    | -0.286    | -0.017    | 0.023     | -0.117    | -0.041    | 0.156     | 0.195  |
| A017352_01 |    | 0.252    | 0.286     | 0.272     | 0.144     | 0.434     | 0.369     | 0.177     | 0.077  |
| A017353_01 |    | 0.099 NA |           | 0.433     | 0.137     | 0.265     | -0.122    | -0.067    | -0.346 |
| A017354_01 |    | -0.879   | -0.87     | 0.178     | 0.078     | -0.591    | -0.538    | -0.446    | -0.565 |
| A017360_01 |    | 0.165    | 0.375     | 0.451     | 0.353     | 0.828     | 0.935     | 0.629     | 0.698  |
| A017361_01 |    | 0.471    | 0.396     | -0.124 NA |           | -0.834 NA | NA        | NA        |        |
| A017363_01 |    | 0.143    | -0.091    | 0.413     | 0.408     | -0.388    | -0.337    | -0.184    | -0.161 |
| A017365_01 | NA | NA       |           | -0.322 NA | NA        | NA        | NA        |           | 0.272  |
| A017378_01 |    | 0.491    | 0.307     | -0.389    | -0.201    | 0.345     | 0.602     | 0.39      | 0.747  |
| A017380_01 |    | -0.063   | -0.455 NA | NA        |           | -1.022    | -1.308 NA | NA        |        |
| A017381_01 |    | 0.142    | 0.088     | -0.023    | 0.039     | 0.173     | 0.333     | 0.113     | 0.121  |
| A017382_01 | NA | NA       |           | 0.184     | 0.131 NA  | NA        |           | -0.211    | -0.448 |
| A017387_01 |    | -0.432   | -0.17     | 0.43      | 0.419     | 0.519     | 0.518     | -0.028    | 0.146  |
| A017389_01 | NA |          | -0.055    | 0.217     | 0.102     | 0.168     | -0.054    | 0.227     | 0.056  |
| A017393_01 |    | 0.309    | 0.069     | 0.45      | 0.205     | 0.552     | 0.73      | 0.627     | 0.852  |



|            |    |        |        |        |        |        |        |        |        |
|------------|----|--------|--------|--------|--------|--------|--------|--------|--------|
| A017394_01 |    | 0.896  | 0.509  | -0.371 | -0.356 | -0.004 | 0.288  | 0.261  | 0.363  |
| A017396_01 |    | 0.453  | 0.235  | 0.181  | 0.208  | 0.142  | 0.1    | 0.087  | -0.063 |
| A017405_01 | NA | NA     |        | 0.126  | 0.147  | 0.7    | 0.412  | 0.578  | 0.334  |
| A017413_01 |    | -0.213 | -0.18  | -0.516 | -0.342 | -0.138 | -0.12  | 0.234  | 0.231  |
| A017419_01 |    | -0.858 | NA     | 0.418  | 0.242  | 0.216  | 0.415  | 0.454  | 0.561  |
| A017421_01 |    | -0.361 | NA     | -0.187 | -0.293 | -0.163 | NA     | 0.021  | 0.011  |
| A017423_01 | NA | NA     |        | 0.238  | -0.089 | NA     | NA     | 0.038  | -0.477 |
| A017425_01 |    | 0.411  | NA     | 0.126  | NA     | 0.569  | 0.329  | 0.322  | 0.362  |
| A017431_01 |    | 0.082  | 0.035  | 0.258  | 0.124  | 0.265  | 0.003  | 0.274  | 0.087  |
| A017433_01 | NA | NA     |        | -0.019 | -0.091 | NA     | -0.203 | -0.062 | -0.289 |
| A017434_01 |    | 0.327  | 0.607  | 0.112  | 0.106  | 0.234  | 0.353  | -0.157 | -0.086 |
| A017443_01 |    | 0.41   | -0.048 | -0.114 | NA     | -0.314 | -0.333 | NA     | NA     |
| A017451_01 |    | -0.106 | NA     | 0.368  | 0.182  | 0.527  | NA     | 0.835  | 0.888  |
| A017452_01 |    | 1.364  | 0.87   | -0.682 | NA     | 0.791  | 0.842  | 0.641  | 1.03   |
| A017460_01 |    | 1.308  | 1.12   | -0.207 | -0.265 | -0.169 | -0.459 | -0.327 | -0.432 |
| A017466_01 |    | -0.047 | -0.303 | -0.565 | -0.585 | -0.386 | -0.599 | -0.398 | -0.469 |
| A017468_01 |    | 0.472  | 0.404  | -0.433 | -0.215 | 0.285  | 0.522  | -0.326 | 0.011  |
| A017471_01 |    | 0.281  | 0.152  | 0.159  | -0.002 | 0.28   | 0.185  | 0.269  | 0.255  |
| A017476_01 |    | 0.746  | NA     | NA     | NA     | 0.2    | NA     | 0.134  | NA     |
| A017477_01 |    | 0.337  | 0.668  | -0.252 | -0.055 | 0.741  | 0.715  | 0.466  | 0.942  |
| A017486_01 |    | 0.165  | 0.068  | 0.462  | 0.279  | 0.263  | 0.147  | 0.317  | 0.15   |
| A017501_01 |    | 0.263  | 0.019  | -0.087 | NA     | -0.096 | -0.266 | -0.036 | -0.081 |
| A017502_01 |    | 0.28   | 0.172  | -0.091 | -0.088 | 0.13   | -0.002 | -0.061 | -0.094 |
| A017508_01 |    | 0.78   | 0.444  | -0.424 | -0.237 | 0.478  | 0.149  | 0.349  | 0.18   |
| A017513_01 |    | -2.133 | -2.631 | NA     | NA     | -1.719 | -1.508 | -0.285 | -0.302 |
| A017517_01 | NA | NA     |        | -0.509 | -0.369 | -0.502 | NA     | -0.128 | -0.025 |
| A017534_01 | NA | NA     |        | 0.321  | 0.113  | NA     | NA     | -0.951 | NA     |
| A017549_01 | NA | NA     |        | -0.144 | -0.219 | NA     | -0.359 | -0.235 | -0.176 |
| A017558_01 | NA | NA     |        | 0.368  | 0.397  | NA     | NA     | -0.374 | -0.469 |
| A017559_01 |    | 0.137  | 0.011  | -0.254 | -0.338 | 0.216  | -0.078 | 0.129  | -0.127 |
| A017562_01 |    | 0.424  | 0.492  | 0.25   | 0.204  | 0.216  | 0.018  | 0.137  | 0.169  |
| A017563_01 |    | -0.39  | -0.018 | 0.153  | 0.046  | 0.236  | 0.246  | -0.033 | -0.055 |
| A017564_01 |    | 0.328  | 0.082  | 0.306  | 0.056  | 1.298  | 0.801  | 0.755  | 0.496  |
| A017569_01 |    | 0.219  | 0.164  | -0.101 | -0.211 | 0.159  | 0.006  | 0.102  | -0.005 |
| A017570_01 | NA | NA     |        | 0.34   | 0.184  | 0.238  | NA     | 0.186  | 0.077  |
| A017575_01 |    | 0.035  | 0.169  | -0.251 | -0.403 | 0.167  | 0.206  | 0.29   | 0.253  |
| A017580_01 |    | -0.497 | -0.274 | 0.038  | -0.194 | -0.548 | -0.714 | NA     | -0.364 |
| A017581_01 |    | 0.463  | 0.434  | -0.036 | 0.081  | 0.327  | 0.444  | 0.176  | 0.277  |
| A017583_01 |    | 0.132  | 0.319  | 0.203  | 0.017  | -0.066 | 0.128  | 0.449  | 0.446  |
| A017587_01 |    | -0.71  | NA     | 0.009  | NA     | -0.489 | NA     | -0.262 | NA     |
| A017589_01 | NA |        | -0.825 | 0.314  | 0.24   | -0.314 | -0.149 | -0.015 | -0.07  |
| A017593_01 |    | -1.551 | -1.499 | -0.121 | -0.099 | -0.929 | -0.676 | -0.326 | -0.398 |
| A017595_01 |    | 0.072  | 0.183  | 0.412  | 0.222  | 0.209  | 0.108  | 0.305  | 0.129  |
| A017597_01 | NA | NA     |        | -0.017 | -0.1   | -0.378 | -0.487 | -0.195 | -0.323 |
| A017600_01 | NA | NA     |        | -0.389 | -0.406 | NA     | NA     | NA     | NA     |
| A017604_01 |    | 0.157  | -0.16  | -0.376 | -0.425 | -0.152 | -0.239 | -0.253 | -0.122 |
| A017612_01 | NA | NA     |        | -0.267 | -0.217 | NA     | NA     | -0.294 | -0.165 |
| A017614_01 |    | -0.215 | -0.213 | 0.068  | -0.089 | 0.327  | 0.209  | 0.237  | 0.029  |
| A017618_01 |    | 0.144  | 0.22   | 0.304  | 0.214  | -0.077 | -0.162 | -0.091 | -0.252 |
| A017633_01 |    | 0.146  | 0.093  | -0.161 | -0.077 | -0.008 | 0.222  | 0.125  | 0.317  |
| A017635_01 | NA | NA     |        | 0.495  | 0.309  | NA     | NA     | -0.102 | -0.033 |
| A017636_01 | NA | NA     |        | 0.118  | 0.088  | 0.27   | 0.102  | 0.036  | -0.005 |
| A017637_01 | NA | NA     |        | 0.239  | 0.243  | NA     | NA     | NA     | NA     |
| A017640_01 |    | 0.693  | 0.441  | 0.27   | 0.201  | 0.735  | 0.625  | 0.243  | 0.164  |
| A017641_01 | NA | NA     |        | 0.404  | 0.299  | 0.092  | 0.008  | -0.137 | -0.059 |
| A017644_01 |    | 0.221  | 0.016  | 0.24   | 0.108  | 0.092  | 0.077  | 0.149  | -0.091 |
| A017646_01 |    | 0.497  | 0.485  | -0.152 | -0.207 | 0.19   | 0.637  | 0.262  | 0.185  |
| A017652_01 |    | -0.273 | 0.009  | 0.594  | 0.59   | 0.692  | 0.578  | 0.209  | 0.203  |
| A017653_01 |    | 0.91   | 0.667  | -0.287 | -0.407 | NA     | 0.286  | 0.226  | 0.148  |
| A017656_01 |    | 0.135  | 0.22   | -0.507 | -0.419 | 0.958  | 0.832  | 0.783  | 0.85   |
| A017657_01 |    | 0.073  | -0.258 | -0.366 | -0.163 | -1.401 | -1.157 | -0.875 | -0.568 |
| A017659_01 |    | -0.415 | -0.646 | -0.188 | -0.374 | -0.786 | -0.828 | -0.497 | -0.634 |
| A017664_01 |    | -1.105 | -0.3   | 0.07   | 0.245  | 0.027  | 0.619  | 0.234  | 0.33   |
| A017667_01 |    | 0.266  | -0.092 | -0.665 | -0.654 | -0.693 | -0.768 | -0.506 | -0.607 |
| A017668_01 | NA | NA     |        | 0.151  | 0.088  | -0.429 | NA     | -0.234 | -0.174 |
| A017671_01 |    | 0.608  | 0.284  | 0.489  | 0.396  | 0.03   | -0.066 | -0.04  | -0.168 |
| A017672_01 |    | 0.864  | 0.766  | -0.043 | 0.272  | 0.276  | 0.53   | -0.015 | 0.47   |
| A017692_01 | NA | NA     |        | 0.053  | -0.079 | NA     | NA     | -0.069 | -0.073 |

|            |    |           |        |           |           |           |           |           |        |
|------------|----|-----------|--------|-----------|-----------|-----------|-----------|-----------|--------|
| A017693_01 |    | 0.018     | 0.206  | -0.537    | -0.358    | -0.18     | 0.017     | -0.139    | 0.191  |
| A017695_01 |    | 1.102     | 1.042  | 0.085     | 0.048     | 0.572     | 0.426     | 0.749     | 0.754  |
| A017699_01 |    | -0.416    | -0.644 | -0.36     | -0.347    | -0.565    | -0.48     | -0.104    | -0.498 |
| A017701_01 |    | -0.943    | -1.011 | -0.663    | -0.579    | -1.258    | -1.031    | -0.818    | -0.736 |
| A017703_01 |    | -0.24     | -0.074 | 0.283     | 0.031     | 0.355     | 0.213     | 0.337     | 0.079  |
| A017713_01 |    | 0.387     | 0.105  | -0.336    | -0.246    | 0.346     | 0.33      | 0.456     | 0.323  |
| A017714_01 |    | -2.288 NA | NA     | NA        | NA        |           | -1.983    | -1.928 NA |        |
| A017715_01 |    | 0.101     | 0.224  | -0.344    | -0.291    | -0.235    | -0.009    | -0.092    | -0.157 |
| A017716_01 |    | 0.018     | -0.001 | -0.328    | -0.348    | 0.064     | -0.04     | 0.057     | -0.146 |
| A017718_01 | NA | NA        |        | 0.284     | 0.33      | -0.142 NA |           | 0.328     | 0.224  |
| A017726_01 | NA | NA        |        | 0.577     | 0.309 NA  | NA        |           | 0.048     | -0.083 |
| A017734_01 |    | 0.06      | 0.287  | -0.011    | -0.027    | 0.17      | 0.174     | 0.056     | 0.117  |
| A017737_01 |    | 1.232     | 1.16   | 0.497     | 0.211     | -1.656    | -1.409 NA | NA        |        |
| A017740_01 |    | 0.48      | 0.429  | 0.22 NA   |           | 0.656     | 0.855 NA  |           | 0.428  |
| A017742_01 |    | -0.37     | -0.486 | -0.51     | -0.48     | -0.666    | -0.781    | -0.487    | -0.482 |
| A017743_01 | NA | NA        |        | 0.024     | -0.045 NA |           | 0.019     | -0.09     | -0.022 |
| A017746_01 |    | -0.337 NA |        | -1.221 NA |           | -0.705 NA | NA        |           | -0.804 |
| A017749_01 | NA | NA        |        | 0.077 NA  | NA        | NA        | NA        | NA        |        |
| A017754_01 | NA | NA        | NA     | NA        | NA        | NA        |           | -0.025 NA |        |
| A017756_01 |    | 0.297     | 0.197  | 0.016     | 0.084     | 0.046     | 0.137     | 0.019     | 0.108  |
| A017757_01 |    | 0.476     | 0.263  | -0.291    | -0.249    | 0.323     | 0.046     | 0.31      | 0.224  |
| A017758_01 |    | -0.255    | 0.318  | -0.126    | -0.109    | -0.6      | -0.319    | -0.463    | -0.333 |
| A017762_01 | NA | NA        |        | 0.225     | 0.146     | -0.466 NA |           | -0.188    | -0.155 |
| A017764_01 | NA | NA        |        | -0.467    | -0.344 NA | NA        |           | -0.42 NA  |        |
| A017767_01 |    | -0.745    | -0.988 | -0.586    | -0.68     | 0.387     | 0.545     | 0.622     | 0.589  |
| A017768_01 |    | -1.449    | -0.724 | -0.18     | -0.115    | -1.047 NA |           | -0.443    | -0.348 |
| A017769_01 |    | -0.391    | -0.114 | 0.181     | 0.043     | -0.036    | 0.157     | 0.302     | 0.251  |
| A017771_01 |    | 0.313     | 0.209  | -0.442    | -0.553    | 0.134     | 0.141     | 0.566     | 0.568  |
| A017777_01 | NA | NA        |        | 0.031     | -0.181    | -0.354 NA |           | -0.247    | -0.281 |
| A017779_01 |    | 0.131     | 0.117  | 0.088     | -0.03     | 0.023     | 0.016     | 0.264     | 0.117  |
| A017782_01 | NA | NA        |        | -0.649    | -0.849 NA | NA        |           | -0.155    | -0.203 |
| A017783_01 |    | 0.523     | 0.467  | 0.071     | 0.05      | 0.741     | 0.488     | 0.335     | 0.086  |
| A017794_01 | NA | NA        |        | -0.047    | -0.103 NA | NA        |           | -0.339    | -0.519 |
| A017798_01 |    | -0.635 NA |        | 0.016     | -0.205    | 0.085     | -0.141    | -0.029    | -0.235 |
| A017799_01 |    | -1.139    | -0.57  | -0.015    | 0.026     | -0.192    | -0.373    | 0.122     | 0.049  |
| A017801_01 |    | 0.02      | -0.265 | -0.51     | -0.527    | -0.051    | -0.237    | -0.075    | -0.003 |
| A017803_01 |    | -1.182    | -0.683 | 0.306     | 0.203     | -0.113    | 0.019     | 0.132     | 0.231  |
| A017807_01 |    | -0.023 NA |        | -0.223    | -0.236    | -0.412    | -0.476    | -0.377    | -0.312 |
| A017808_01 |    | -0.591 NA |        | 0.125     | 0.052     | -0.753    | -1.1      | -0.422    | -0.43  |
| A017812_01 | NA | NA        |        | -0.222 NA |           | 0.305 NA  | NA        | NA        |        |
| A017813_01 |    | 0.508     | 0.578  | -0.645    | -0.56     | -0.801    | -0.705    | -0.568    | -0.404 |
| A017815_01 |    | -2.381 NA | NA     | NA        |           | -2.495    | -2.521    | -2.531 NA |        |
| A017824_01 |    | 0.122     | 0.628  | -0.41     | -0.071    | -0.181    | 0.604     | 0.484     | 0.808  |
| A017825_01 | NA | NA        |        | -0.067    | -0.121    | -0.002    | -0.054    | -0.109    | 0.131  |
| A017835_01 |    | 0.501     | 0.358  | 0.303     | 0.39      | 0.459     | 0.298     | 0.032     | 0.087  |
| A017837_01 |    | -1.041    | -0.795 | -0.455    | -0.417    | -0.535    | -0.1      | -0.917    | -0.707 |
| A017839_01 |    | 0.177     | 0      | 0.298     | -0.01     | -0.092    | -0.033    | -0.122    | -0.101 |
| A017845_01 |    | -0.259 NA |        | 0.043     | -0.03     | -0.141    | -0.018    | -0.166    | -0.244 |
| A017848_01 |    | -0.623    | -0.809 | 0.465     | 0.246     | 0.299     | 0.104     | 0.192     | 0.055  |
| A017849_01 |    | -0.09 NA  |        | -0.151    | -0.332    | -0.157    | -0.055    | -0.12     | -0.25  |
| A017850_01 | NA | NA        | NA     | NA        | NA        | NA        |           | -0.583 NA |        |
| A017852_01 |    | -0.706 NA |        | 0.291     | 0.126     | 0.014     | 0.041     | -0.179    | -0.087 |
| A017855_01 | NA |           | -0.545 | 0.642     | 0.406     | 0.094     | -0.23     | -0.136    | -0.421 |
| A017856_01 |    | 0.581     | 0.599  | -0.088    | 0.045     | 0.015     | 0.327     | -0.052    | 0.231  |
| A017858_01 |    | 0.688     | 0.505  | 0.217     | 0.194     | 0.479     | 0.359     | 0.356     | 0.437  |
| A017859_01 |    | 1.03      | 0.797  | -0.408    | -0.408    | -0.013    | -0.1      | -0.029    | -0.062 |
| A017860_01 |    | -0.228    | -0.236 | -1.192 NA |           | -1.015    | -1.003    | -0.77     | -0.945 |
| A017861_01 |    | 0.856     | 0.471  | 0.208     | 0.022     | 0.584     | 0.298     | 0.333     | 0.159  |
| A017863_01 |    | 0.317     | 0.125  | -0.014    | 0.028     | 0.014     | 0.229     | 0.276     | 0.49   |
| A017866_01 |    | 0.662     | 0.459  | 0.398 NA  |           | 0.357     | -0.022 NA | NA        |        |
| A017867_01 |    | 0.744     | 0.544  | 0.34      | 0.293     | 0.656     | 0.804     | 0.485     | 0.556  |
| A017868_01 | NA | NA        |        | 0.203     | 0.05      | 0.619     | 0.517     | 0.544     | 0.52   |
| A017869_01 |    | 0.427     | 0.117  | -0.356    | -0.382    | 0.068     | 0.106     | 0.054     | 0.022  |
| A017871_01 | NA | NA        |        | 0.143 NA  |           | 0.964 NA  | NA        |           | 0.881  |
| A017872_01 |    | 0.311     | 0.444  | 0.091     | 0.061     | 0.38      | 0.602     | 0.273     | 0.633  |
| A017873_01 |    | 0.45      | -0.005 | -0.23     | -0.303    | -0.056    | -0.228    | -0.242    | -0.162 |
| A017874_01 |    | 0.566     | 0.446  | -0.088    | -0.193    | 0.385     | 0.41      | 0.603     | 0.582  |
| A017877_01 |    | 0.506     | 0.353  | 0.265 NA  |           | -0.048    | 0.25      | -0.067    | 0.271  |

|               |          |        |           |           |           |           |        |        |
|---------------|----------|--------|-----------|-----------|-----------|-----------|--------|--------|
| A017878_01    | -0.284   | -0.097 | 0.177     | 0.088     | 0.396     | 0.227     | 0.328  | 0.288  |
| A017880_01    | 0.185    | -0.19  | -0.431    | -0.467    | -0.049    | -0.303    | 0.05   | -0.209 |
| A017882_01    | -0.312   | 0.048  | -0.658    | -0.414    | -0.169    | 0.331     | 0.026  | 0.238  |
| A017885_01    | 0.677    | 0.529  | -0.631 NA |           | -0.303    | -0.596 NA | NA     |        |
| A017886_01    | 0.098    | 0.113  | -0.158    | -0.131    | -0.301    | -0.236    | -0.263 | -0.194 |
| A017887_01    | 0.281    | 0.452  | 0.367     | 0.138     | 0.448     | 0.499     | 0.481  | 0.39   |
| A017890_01    | -0.64 NA |        | 0.343     | 0.046     | 0.14      | 0.165     | 0.607  | 0.58   |
| A017892_01    | 0.136    | 0.071  | -0.128    | -0.192    | 0.177     | 0.189     | 0.277  | 0.293  |
| A017894_01    | -1.106   | -1.067 | -0.7      | -0.606    | -1.378    | -1.082    | -0.906 | -0.855 |
| A017897_01 NA | NA       |        | -0.393    | -0.504    | -0.45     | -0.692    | -0.561 | -0.809 |
| A017899_01 NA | NA       |        | 0.263     | -0.019 NA | NA        |           | 0.156  | -0.061 |
| A017900_01 NA | NA       |        | -0.083    | -0.07 NA  | NA        |           | -0.444 | -0.412 |
| A017901_01 NA |          | 0.043  | 0.159 NA  |           | 0.333 NA  | NA        |        | 0.132  |
| A017902_01    | -0.237   | 0.193  | -0.17     | -0.143    | 0.325     | 0.518     | 0.176  | 0.271  |
| A017904_01 NA | NA       | NA     | NA        | NA        | NA        | -2.194 NA | NA     |        |
| A017909_01    | 0.682    | 0.369  | 0         | -0.08     | 0.151     | -0.117    | -0.114 | -0.161 |
| A017913_01 NA |          | -1.031 | 0.846     | 0.717     | 0.519     | 0.324     | 0.132  | 0.171  |
| A017915_01 NA |          | -1.03  | -0.733 NA | NA        | NA        | NA        | NA     | NA     |
| A017916_01 NA | NA       |        | -0.169 NA | NA        | NA        | NA        | NA     | NA     |
| A017918_01 NA | NA       |        | 0.308     | 0.214 NA  | NA        |           | -0.442 | -0.451 |
| A017920_01    | 0.284    | 0.317  | -0.133    | -0.096    | 0.024     | 0.207     | -0.021 | 0.227  |
| A017922_01    | -0.079   | 0.116  | 0.001     | -0.291    | 0.177     | 0.092     | 0.305  | 0.186  |
| A017923_01    | -0.268   | 0.134  | 0.037     | -0.098    | 0.472     | 0.543     | 0.549  | 0.497  |
| A017924_01    | -1.276   | -1.507 | 0.613     | 0.463     | -1.192    | -1.201    | -0.206 | -0.255 |
| A017925_01    | 0.643    | 0.556  | 0.434     | 0.366     | 1.028     | 0.897     | 0.653  | 0.708  |
| A017928_01    | 0.076    | -0.145 | -0.274    | -0.216    | -0.151    | -0.301    | -0.069 | 0      |
| A017933_01    | -0.539   | -0.622 | 0.016     | 0.011     | -0.854    | -0.871    | -0.062 | -0.293 |
| A017934_01    | -0.735   | -0.213 | 0.052     | -0.013    | 0.23      | 0.079     | 0.257  | 0.325  |
| A017935_01    | -0.198   | -0.017 | 0.302     | 0.271     | 0.091     | 0.125     | 0.296  | 0.286  |
| A017936_01    | 0.33     | 0.259  | -0.185    | -0.168    | 0.599     | 0.657     | 0.87   | 0.86   |
| A017937_01    | 0.285    | 0.359  | 0.141     | 0.054     | 0.493     | 0.473 NA  |        | 0.389  |
| A017938_01    | 0.079    | 0.232  | -0.143    | -0.25     | 0.1       | 0.085     | -0.407 | -0.505 |
| A017942_01    | -2.183   | -3.189 | -2.602    | -2.367    | -2.338    | -2.147    | -2.072 | -2.641 |
| A017945_01    | -0.87    | -0.336 | 0.055     | 0.051     | 0.126     | 0.103     | 0.048  | 0.025  |
| A017949_01 NA | NA       |        | -0.228    | -0.332    | 0.056 NA  |           | 0.101  | 0.109  |
| A017950_01    | 0.365    | 0.192  | -0.042    | 0.029     | -0.178    | -0.361    | -0.24  | -0.231 |
| A017951_01    | 0.098    | -0.179 | -0.262    | -0.346    | -0.434    | -0.534    | -0.124 | -0.421 |
| A017952_01    | 0.51     | 0.433  | 0.06      | 0.153     | 0.14      | 0.168     | 0.2    | 0.406  |
| A017955_01    | -0.291   | -0.147 | -0.352    | -0.156    | -0.024    | 0.153     | 0.23   | 0.381  |
| A017957_01    | 0.203    | 0.387  | 0.263     | 0.193     | -0.101    | -0.283    | -0.138 | -0.073 |
| A017962_01    | 0.299    | 0.493  | -0.214    | -0.173    | 0.211     | 0.583     | 0.259  | 0.443  |
| A017965_01    | -1.26    | -0.686 | -0.121    | -0.184    | 0.054     | 0.203     | 0.577  | 0.392  |
| A017967_01    | 0.255    | 0.335  | -0.082    | 0.147     | 0.274     | 0.606     | -0.017 | 0.502  |
| A017971_01    | -0.265   | -0.349 | -0.901    | -0.725    | -0.791    | -0.448    | -0.642 | -0.321 |
| A017972_01    | -1.074   | -0.514 | -0.294    | -0.334    | -0.742 NA | NA        |        | -0.333 |
| A017974_01    | -0.171   | 0.272  | 0.404     | 0.43      | 0.359     | 0.435     | 0.717  | 0.793  |
| A017975_01    | -1.034   | -0.341 | 0.226     | 0.203     | -0.171    | 0.023     | 0.046  | 0.111  |
| A017977_01    | 0.191    | 0.384  | 0.496     | 0.442     | 0.593     | 0.808     | 0.486  | 0.607  |
| A017979_01    | 0.24     | 0.275  | -0.458    | -0.395    | 0.873     | 1.057     | 0.73   | 1.212  |
| A017980_01    | 0.616    | 0.561  | -0.13     | -0.007    | 0.603     | 0.816     | 0.506  | 0.846  |
| A017982_01    | -0.038   | 0.087  | 0.439     | 0.368     | 0.086     | 0.167     | -0.242 | -0.045 |
| A017983_01    | 0.931    | 1.021  | -0.002    | 0.055     | 0.416     | 0.487     | 0.163  | 0.156  |
| A017985_01 NA | NA       |        | 0.306     | -0.007    | -0.434 NA |           | -0.467 | -0.257 |
| A017987_01    | 0.07     | 0.281  | 0.281     | 0.152     | 0.001     | -0.067    | 0.008  | -0.094 |
| A017991_01    | -0.354   | -0.053 | -0.117    | 0.03      | -0.09     | 0.009     | -0.224 | -0.115 |
| A017993_01    | 0.25     | 0.589  | 0.009     | 0.2       | 0.443     | 0.447     | 0.367  | 0.582  |
| A017994_01    | 0.101 NA |        | -0.275    | -0.237 NA | NA        |           | 0.16   | 0.29   |
| A017995_01    | 0.251    | 0.492  | -0.2      | -0.254    | -0.218    | -0.488    | -0.32  | -0.452 |
| A017996_01    | -0.186   | -0.009 | 0.172     | 0.128     | -0.294    | -0.145    | -0.082 | -0.13  |
| A018000_01    | -0.544   | -0.427 | -0.594    | -0.396    | -0.441    | -0.152    | -0.342 | 0.051  |
| A018004_01    | -0.391   | -0.191 | 0.02      | -0.137    | -0.227    | -0.098    | 0.013  | -0.042 |
| A018006_01    | -2.496   | -3.044 | -2.845    | -1.845    | -2.31     | -1.644    | -1.889 | -2.028 |
| A018011_01    | -0.192   | -0.24  | 0.174     | 0.09      | 0.005     | -0.096    | -0.037 | -0.063 |
| A018016_01    | -0.971   | -0.341 | -0.091    | 0.053     | -0.35     | -0.162    | 0.02   | 0.115  |
| A018017_01    | -1.011   | -0.621 | -0.1      | 0.046     | -0.24     | -0.152    | -0.221 | -0.184 |
| A018019_01    | -2.412   | -2.611 | -0.375    | -0.081    | -2.451    | -2.035    | -1.338 | -1.161 |
| A018022_01    | -1.119   | -0.597 | 0.087     | 0.097     | -0.441    | -0.252    | -0.075 | 0.024  |
| A018025_01    | 0.2      | 0.245  | -0.326    | -0.277    | -0.105    | -0.189    | -0.244 | -0.117 |

|            |           |        |           |           |           |          |          |        |
|------------|-----------|--------|-----------|-----------|-----------|----------|----------|--------|
| A018028_01 | -1.816    | -1.714 | -0.485    | -0.316    | -1.546    | -1.142   | -0.889   | -0.942 |
| A018029_01 | -0.157    | -0.41  | 0.355     | 0.19      | 0.13      | 0.066    | 0.074    | -0.025 |
| A018032_01 | 0.636     | 0.7    | -0.014    | -0.08     | 0.771     | 0.592    | 1.237    | 1.131  |
| A018034_01 | 0.576     | 0.493  | 0.137     | 0.118     | 0.82      | 0.755    | 0.468    | 0.792  |
| A018038_01 | -0.844    | -0.453 | 0.189     | 0.168     | -0.172    | 0.069    | -0.122   | -0.17  |
| A018041_01 | -1.819 NA |        | 0.296     | 0.233     | -1.549    | -1.183   | -0.722   | -0.959 |
| A018042_01 | -0.327    | -0.572 | -0.321    | -0.405    | -0.434    | -0.466   | -0.578   | -0.571 |
| A018043_01 | -0.278    | -0.161 | 0.209     | 0.191     | 0.326     | 0.38     | 0.245    | 0.273  |
| A018046_01 | NA        | NA     | 0.318     | 0.313     | -0.339    | -0.106   | -0.334   | -0.272 |
| A018047_01 | -0.595    | -0.233 | 0.285     | 0.315     | -0.484    | -0.353   | -0.17    | -0.267 |
| A018048_01 | -0.495    | -0.348 | 0.126     | 0.208     | -0.04     | 0.197    | 0.075    | 0.113  |
| A018049_01 | -0.196    | -0.173 | -0.051    | 0.019     | -0.41     | -0.475   | 0.044    | 0.12   |
| A018052_01 | -0.535    | -0.015 | 0.623     | 0.429     | 0.401     | 0.408    | 0.064    | -0.027 |
| A018054_01 | 0.882     | 0.683  | 0.365     | 0.172     | 0.631     | 0.527    | 0.686    | 0.626  |
| A018058_01 | -0.1      | 0.081  | 0.024     | -0.09     | -0.626    | -0.311   | -0.199   | -0.387 |
| A018060_01 | -0.606    | -0.447 | -0.293    | -0.084    | -0.179    | -0.394   | -0.203   | -0.366 |
| A018062_01 | -0.558 NA |        | -0.214 NA |           | 0.21 NA   |          | 0.295 NA |        |
| A018064_01 | -0.006    | 0.391  | 0.249     | 0.144     | 0.307     | 0.791    | 0.734    | 0.723  |
| A018065_01 | -1.049    | -0.58  | -0.664    | -0.508    | -0.171    | -0.047   | -0.256   | -0.184 |
| A018066_01 | -1.007    | 0.024  | 0.347     | 0.466     | 0.293     | 0.768    | 0.613    | 0.799  |
| A018067_01 | -0.371    | -0.139 | -0.101    | -0.097    | -0.559    | -0.382   | -0.203   | -0.365 |
| A018068_01 | -0.163    | 0.031  | -0.115    | -0.024    | 0.746     | 0.84     | 0.575    | 0.853  |
| A018069_01 | -0.411    | -0.293 | 0.037     | 0.076     | -0.36     | -0.474   | -0.325   | -0.303 |
| A018070_01 | NA        | NA     | 0.617     | 0.396 NA  |           | 0.371    | 0.129    | 0.008  |
| A018071_01 | NA        | NA     | -0.867    | -0.708 NA | NA        |          | -0.676   | -1.207 |
| A018072_01 | 0.297     | 0.118  | -0.183    | -0.091    | -0.069    | 0.015    | -0.069   | 0.118  |
| A018074_01 | 0.308     | 0.453  | 0.162     | 0.28      | 0.281     | 0.334    | -0.225   | -0.104 |
| A018076_01 | NA        | NA     | 0.898     | 0.536 NA  | NA        |          | 0.327    | 0.068  |
| A018080_01 | 0.164     | -0.024 | 0.13      | 0.24      | -0.729    | -0.739   | -0.407   | -0.255 |
| A018081_01 | -0.074    | -0.424 | 0.161     | -0.086    | 0.1       | -0.004   | 0.306    | 0.047  |
| A018085_01 | 0.64      | 0.629  | 0.192 NA  |           | 0.417     | 0.501 NA |          | 0.532  |
| A018088_01 | -1.277    | -0.721 | 0.25      | 0.068     | -0.277    | -0.169   | -0.311   | -0.453 |
| A018089_01 | -0.501    | 0.057  | 0.272     | 0.113     | 0.163     | 0.341    | 0.346    | 0.286  |
| A018092_01 | -0.172    | 0.278  | -0.054    | 0.034     | 0.121     | 0.288    | 0.213    | 0.219  |
| A018093_01 | NA        | NA     | 0.278     | 0.024 NA  | NA        |          | -0.091   | -0.451 |
| A018097_01 | NA        | -0.267 | -0.7 NA   |           | 0.052 NA  |          | -0.189   | -0.296 |
| A018098_01 | -0.872    | -0.474 | 0.306     | 0.303     | 0.661     | 0.44     | 0.619    | 0.725  |
| A018099_01 | -0.264    | 0.014  | -0.691    | -0.498    | 0.035     | 0.009    | 0.241    | 0.279  |
| A018100_01 | NA        | NA     | -1.543    | -1.216    | -0.284    | -0.243   | -0.718   | -0.881 |
| A018101_01 | 0.698     | 0.482  | 0.393     | 0.293     | 0.247     | 0.013    | 0.026    | -0.048 |
| A018102_01 | 0.364     | 0.03   | -0.536    | -0.437    | -0.182 NA |          | 0.233    | 0.221  |
| A018103_01 | 0.39      | 0.444  | 0.222     | 0.232     | 0.012     | 0.374    | 0.074    | 0.334  |
| A018104_01 | -0.167    | -0.369 | -0.067    | -0.127    | -0.366    | -0.354   | -0.183   | -0.231 |
| A018105_01 | 0.524     | 0.469  | 0.513     | 0.367     | 0.148     | 0.293    | 0.082    | 0.086  |
| A018106_01 | NA        | NA     | -0.173    | -0.274 NA |           | -0.234   | -0.085   | -0.271 |
| A018107_01 | 0.622     | 0.555  | 0.217     | 0.133     | 0.567     | 0.422    | 0.356    | 0.344  |
| A018108_01 | NA        | NA     | 0.369     | 0.524 NA  | NA        | NA       |          | 0.076  |
| A018110_01 | -0.078    | -0.086 | 0.408     | 0.272     | 0.517     | 0.361    | 0.156    | 0.167  |
| A018111_01 | -0.475    | -0.066 | 0.036     | 0.007     | 0.185     | 0.245    | 0.277    | 0.237  |
| A018115_01 | -0.096    | -0.016 | 0.274     | 0.161     | 0.008     | -0.222   | -0.091   | 0.02   |
| A018117_01 | 0.213     | 0.124  | 0.046     | 0.101     | -0.072    | -0.193   | -0.419   | -0.227 |
| A018119_01 | -0.629    | -0.713 | 0.014     | -0.114    | -0.292    | -0.314   | -0.254   | -0.528 |
| A018126_01 | 0.229     | 0.214  | 0.027     | -0.083    | -0.204    | -0.365   | -0.003   | -0.02  |
| A018128_01 | -0.029    | 0.103  | -0.244 NA |           | 0.297     | 0.23     | 0.478    | 0.491  |
| A018135_01 | 0.195     | -0.1   | -0.443    | -0.456    | 0.17      | -0.183   | -0.167   | -0.063 |
| A018139_01 | 0.211     | 0.491  | 0.302     | 0.263     | 0.386     | 0.303    | 0.373    | 0.509  |
| A018147_01 | -0.074    | 0.124  | 0.129     | 0.088     | 0.427     | 0.468    | 0.25     | 0.162  |
| A018151_01 | 0.151     | 0.159  | -0.05     | -0.023    | 0.353     | 0.34     | 0.223    | 0.194  |
| A018153_01 | 0.303 NA  |        | 0.521     | 0.373     | 0.101 NA  |          | 0.173    | 0.044  |
| A018154_01 | 0.746     | 0.614  | 0.266     | 0.185     | 0.27      | 0.462    | 0.27     | 0.339  |
| A018155_01 | NA        | NA     | 0.065     | -0.026 NA | NA        |          | -0.042   | -0.148 |
| A018156_01 | 0.316     | 0.326  | 0.045     | 0.085     | 0.716     | 0.662    | 0.957    | 0.923  |
| A018157_01 | 0.219     | 0.253  | -0.23     | -0.173    | -0.032    | 0.319    | 0.042    | 0.306  |
| A018159_01 | -0.557    | -0.222 | 0.291     | 0.345     | 0.694     | 0.628    | 0.065    | 0.291  |
| A018163_01 | 1.265     | 0.986  | 0.512     | 0.422     | 0.107     | -0.067   | 0.224    | 0.371  |
| A018171_01 | 0.881     | 0.351  | 0.334     | 0.126     | 0.413     | 0.226    | 0.056    | 0.067  |
| A018174_01 | -0.055    | -0.322 | -0.245    | -0.183    | -0.195    | -0.512   | -0.226   | -0.352 |
| A018175_01 | -0.298    | -0.034 | 0.393     | 0.409     | 0.334     | 0.496    | 0.115    | 0.174  |

|            |    |           |          |           |           |           |  |           |           |        |  |
|------------|----|-----------|----------|-----------|-----------|-----------|--|-----------|-----------|--------|--|
| A018176_01 |    | 0.061 NA  |          | 0.102 NA  |           | 0.372     |  | 0.293 NA  |           | NA     |  |
| A018179_01 | NA | NA        |          | 0.306     | 0.117 NA  | NA        |  |           | 0.18      | 0.176  |  |
| A018182_01 |    | 0.565     | 0.217    | -0.248    | -0.134    | 0.288     |  | 0.135     | -0.129    | -0.145 |  |
| A018183_01 |    | 0.628     | 0.495    | 0.25      | 0.291     | 0.387     |  | 0.399     | 0.223     | 0.402  |  |
| A018185_01 |    | -0.086    | -0.201   | 0.151     | 0.075     | 0.31      |  | 0.207     | 0.076     | 0.002  |  |
| A018189_01 |    | 0.704     | 0.576    | 0.143     | 0.405     | 0.638     |  | 0.938     | 0.644     | 0.805  |  |
| A018193_01 | NA | NA        |          | 0.231 NA  |           | 0.607     |  | 0.116     | 0.459 NA  |        |  |
| A018195_01 |    | 0.226     | 0.367    | 0.555     | 0.512     | 0.015     |  | 0.113     | -0.049    | -0.064 |  |
| A018200_01 | NA | NA        |          | 0.342     | 0.182     | 0.472     |  | 0.014     | 0.209     | -0.022 |  |
| A018204_01 | NA | NA        |          | 0.108     | 0.079 NA  | NA        |  |           | -0.282    | -0.329 |  |
| A018205_01 |    | -0.294    | -0.172   | 0.439     | 0.165     | 0.249     |  | 0.146     | 0.326     | 0.062  |  |
| A018206_01 |    | 0.438     | 0.214    | 0.139     | 0.031     | 0.415     |  | 0.487     | 0.275     | 0.307  |  |
| A018207_01 |    | -0.787    | -0.454   | 0.071     | 0.1       | -0.166    |  | -0.036    | 0.123     | 0.243  |  |
| A018210_01 | NA | NA        |          | 0.306     | 0.222     | -0.109 NA |  |           | -0.287    | -0.196 |  |
| A018211_01 |    | 0.265     | -0.119   | -0.398    | -0.402    | -0.007    |  | -0.137    | -0.126    | -0.138 |  |
| A018214_01 |    | -0.368    | 0.166    | 0.156     | 0.248     | 0.026     |  | 0.549     | 0.364     | 0.459  |  |
| A018216_01 |    | 0.427     | 0.222    | 0.142 NA  |           | 0.322 NA  |  | NA        | NA        | NA     |  |
| A018226_01 |    | 0.631 NA  |          | 0.24      | 0.129 NA  | NA        |  |           | 0.062 NA  | NA     |  |
| A018234_01 |    | 0.629     | 0.451    | 0.317     | 0.232     | 0.263 NA  |  | NA        | NA        | NA     |  |
| A018237_01 |    | 0.199 NA  |          | -0.739    | -0.967    | -0.817    |  | -1.164    | -0.971    | -1.185 |  |
| A018239_01 |    | 0.49      | 0.219    | -0.258 NA |           | 1.099     |  | 0.657     | 0.723     | 0.783  |  |
| A018240_01 |    | -1.154    | -0.729   | -0.475    | -0.379    | -0.332    |  | -0.209    | 0.339     | 0.329  |  |
| A018241_01 |    | -0.191    | -0.212   | 0.167     | 0.183     | -0.053    |  | -0.19     | -0.168    | -0.141 |  |
| A018242_01 | NA | NA        |          | -0.008    | -0.149 NA |           |  | -0.277    | -0.095    | -0.373 |  |
| A018243_01 |    | -0.098    | 0.116    | 0.069     | -0.015    | 0.216     |  | 0.004     | -0.171    | -0.169 |  |
| A018248_01 | NA | NA        |          | 0.154     | 0.101 NA  | NA        |  |           | 0.008     | -0.146 |  |
| A018249_01 | NA | NA        |          | 0.741     | 0.338 NA  | NA        |  |           | -0.067    | -0.248 |  |
| A018251_01 | NA |           | -0.9 NA  | NA        | NA        | NA        |  | NA        | NA        | NA     |  |
| A018253_01 | NA | NA        |          | 0.463     | 0.237     | 0.133     |  | 0.26      | 0.196     | 0.097  |  |
| A018254_01 |    | -0.422    | -0.605   | 0.233     | 0.095     | -0.27     |  | -0.338    | -0.12     | -0.178 |  |
| A018256_01 | NA | NA        |          | -0.159    | -0.151    | -0.465 NA |  |           | -0.132    | -0.347 |  |
| A018258_01 |    | 0.517     | 0.515    | 0.102     | 0.094     | 0.244     |  | 0.193     | 0.238     | 0.335  |  |
| A018259_01 |    | 0.705     | 0.866    | 0.318     | 0.257     | 1.383     |  | 0.949     | 1.003     | 0.936  |  |
| A018264_01 |    | 0.287     | 0.023    | 0.263     | 0.133     | 0.279     |  | 0.328     | 0.152     | 0.114  |  |
| A018266_01 |    | -0.764    | -0.22    | 0.004     | -0.042    | 0.4       |  | 0.297     | 0.361     | 0.3    |  |
| A018267_01 |    | 0.087     | 0.309    | -0.09     | 0.048     | 0.029     |  | 0.397     | 0.036     | 0.194  |  |
| A018269_01 |    | -0.574    | -0.759   | -0.562    | -0.505    | -0.473    |  | -0.427    | -0.268    | -0.503 |  |
| A018270_01 |    | 0.879     | 0.788    | -0.009    | 0.062     | 0.77      |  | 0.797     | 0.703     | 0.896  |  |
| A018272_01 |    | 0.79      | 0.446    | 0.098     | 0.032     | 0.767     |  | 0.826     | 0.536     | 0.595  |  |
| A018273_01 |    | -0.998    | -0.659   | -0.208    | -0.074    | -0.046    |  | -0.183    | -0.277    | -0.287 |  |
| A018276_01 |    | 0.376     | 0.099    | 0         | -0.145    | -0.185    |  | -0.176    | -0.078    | -0.178 |  |
| A018277_01 |    | -0.719    | -0.952   | -1.23     | -1.062    | -0.999    |  | -0.866    | -0.879    | -0.939 |  |
| A018280_01 |    | 0.504     | 0.379    | 0.242     | 0.197     | 0.719     |  | 0.534     | 0.052     | 0.103  |  |
| A018297_01 |    | -1.056    | -0.768   | -0.144    | -0.051    | -1.253    |  | -0.925    | -0.518    | -0.558 |  |
| A018300_01 |    | -1.564    | -0.679   | -0.107    | -0.018    | -1.572    |  | -1.608    | -1.041    | -0.999 |  |
| A018304_01 | NA | NA        |          | -0.043    | 0.125 NA  | NA        |  |           | -0.113    | 0.045  |  |
| A018307_01 |    | 0.124     | 0.28     | -0.087    | -0.024    | 0.56      |  | 0.638     | 0.481     | 0.463  |  |
| A018308_01 |    | -0.395    | -0.848   | -1.115    | -0.923    | -0.053    |  | 0.188     | 0.129     | 0.222  |  |
| A018312_01 |    | -0.467 NA |          | -0.194    | -0.183    | -0.347    |  | -0.41     | -0.098 NA |        |  |
| A018314_01 |    | 0.604     | 0.469 NA |           | 0.309     | 0.483     |  | 0.265     | 0.216     | 0.257  |  |
| A018315_01 | NA | NA        |          | -0.404    | -0.469 NA |           |  | -0.092    | -0.227    | -0.299 |  |
| A018319_01 |    | -0.169    | -0.1     | 0.069     | 0.021     | 0.465     |  | 0.332     | 0.577     | 0.509  |  |
| A018321_01 |    | 0.865     | 0.363    | 0.029 NA  | NA        |           |  | -0.218 NA | NA        |        |  |
| A018323_01 | NA |           | 0.047    | -0.386    | -0.192 NA | NA        |  | NA        |           | 0.203  |  |
| A018330_01 |    | -0.411 NA |          | -0.002    | -0.228    | 0.248     |  | 0.114     | 0.389     | 0.216  |  |
| A018334_01 |    | -1.406    | -0.993   | 0.53      | 0.474     | -0.004    |  | 0.106     | -0.022    | -0.032 |  |
| A018338_01 |    | 0.525     | 0.502    | -0.185    | -0.124    | 0.106     |  | 0.197     | 0.319     | 0.264  |  |
| A018340_01 | NA | NA        |          | -0.026 NA | NA        | NA        |  | NA        |           | 0.232  |  |
| A018343_01 | NA |           | -0.531   | -0.709 NA | NA        |           |  | -0.612 NA |           | -0.598 |  |
| A018344_01 | NA | NA        |          | -0.011    | -0.108 NA | NA        |  |           | -0.092    | -0.161 |  |
| A018348_01 |    | 0.163     | 0.131    | 0.109     | 0.244     | 0.23      |  | 0.242     | 0.124     | 0.096  |  |
| A018349_01 |    | 0.735     | 0.226    | -0.657    | -0.602    | 0.21      |  | -0.03     | -0.321    | -0.276 |  |
| A018354_01 |    | 0.788     | 0.566    | -0.227 NA |           | 0.724     |  | 0.493     | 0.584     | 0.417  |  |
| A018355_01 |    | 0.384 NA  |          | -0.65     | -0.945    | 0.131     |  | -0.211    | -0.059    | -0.29  |  |
| A018357_01 |    | 0.323     | 0.067    | -0.095    | -0.178    | 0.121     |  | 0.076     | -0.053    | 0.22   |  |
| A018358_01 |    | 0.068     | 0.07     | -0.263    | -0.126    | -0.489    |  | 0.002     | -0.233    | 0.167  |  |
| A018362_01 |    | 0.63      | 0.281    | 0.353     | 0.294 NA  | NA        |  | NA        | NA        | NA     |  |
| A018371_01 | NA | NA        |          | 0.253     | 0.098     | 0.3       |  | 0.591     | 0.456     | 0.601  |  |

|            |    |           |          |           |           |           |           |           |        |
|------------|----|-----------|----------|-----------|-----------|-----------|-----------|-----------|--------|
| A018373_01 |    | 0.386     | 0.333    | -0.387    | -0.678    | 0.115     | 0.016     | 0.36      | 0.251  |
| A018377_01 |    | -0.348    | -0.14    | 0.151     | -0.12     | -0.092    | -0.088    | 0.045     | -0.178 |
| A018384_01 | NA |           | 0.114    | 0.133     | 0.099 NA  |           | 0.304     | 0.38      | 0.327  |
| A018386_01 |    | 0.854     | 0.24     | 0.221     | 0.143 NA  |           | -0.337    | 0.094     | 0.204  |
| A018393_01 |    | 0.461     | 0.251    | -0.244 NA |           | -0.132 NA | NA        | NA        |        |
| A018395_01 |    | -0.814    | -0.945   | -0.428    | -0.371    | -0.594    | -0.725    | -0.288    | -0.475 |
| A018397_01 | NA |           | 0.089    | -0.04     | 0.093     | 0.437     | 0.376     | 0.269     | 0.295  |
| A018399_01 |    | -0.19     | 0.055    | -0.02     | -0.08     | 0.049     | 0.075     | 0.179     | 0.162  |
| A018406_01 |    | -0.891    | -0.538   | 0.523     | 0.243     | 0.259     | 0.119 NA  |           | -0.157 |
| A018411_01 | NA |           | 0.149    | 0.005     | 0.031     | 0.349     | 0.212     | 0.185     | 0.288  |
| A018412_01 |    | 0.381     | 0.24     | 0.169     | 0.242     | -0.058    | 0.264 NA  |           | 0.383  |
| A018421_01 |    | -0.07     | 0.309    | -0.458    | -0.111    | 0.233     | 0.133     | -0.054    | 0.117  |
| A018423_01 |    | 0.424     | 0.416    | -0.064    | -0.168    | 0.644     | 0.517     | 0.572     | 0.358  |
| A018426_01 |    | 0.612     | 0.24     | 0.115     | -0.038    | 0.233     | 0.021     | 0.127     | 0.032  |
| A018427_01 |    | 0.091     | 0.122    | 0.152     | 0.078     | 0.838     | 0.686     | 0.435     | 0.371  |
| A018428_01 |    | -0.437    | -0.756   | -0.922    | -0.86     | -0.59     | -0.702    | -0.287    | -0.36  |
| A018432_01 |    | 0.267     | 0.332    | -0.102    | -0.248    | 0.406     | 0.161     | 0.359     | -0.094 |
| A018440_01 |    | 0.971     | 0.6      | -0.05     | -0.044    | 0.599     | 0.521     | 0.586     | 0.658  |
| A018442_01 |    | 0.533     | 0.033    | -0.03     | -0.037    | 0.501     | 0.23      | 0.24      | 0.093  |
| A018445_01 |    | 0.223 NA  |          | -0.036    | -0.143    | 0.077 NA  |           | -0.018 NA |        |
| A018446_01 | NA | NA        |          | -0.061    | -0.131 NA | NA        |           | 0.139     | -0.079 |
| A018448_01 |    | -0.892    | -0.765   | 0.381     | 0.29      | -0.271    | -0.428    | -0.186    | -0.457 |
| A018450_01 |    | -1.791    | -2.554   | -2.431    | -1.967    | -1.874    | -1.474    | -1.489    | -2.01  |
| A018454_01 |    | 0.242     | 0.178    | 0.446     | 0.261     | 0.275     | 0.137     | 0.291     | -0.036 |
| A018460_01 |    | 0.065     | 0.177    | 0.688     | 0.298     | 0.625     | 0.444     | 0.713     | 0.611  |
| A018461_01 |    | -0.235    | 0.271    | 0.316     | 0.291     | -0.088    | 0.491     | 0.125     | 0.386  |
| A018466_01 |    | 0.759     | 0.41     | -0.274    | -0.334    | 0.368     | 0.156     | -0.09 NA  |        |
| A018467_01 | NA | NA        | NA       | NA        | NA        | NA        | NA        | -1.005 NA |        |
| A018477_01 |    | 0.117     | 0.209    | 0.26      | 0.227     | 0.033     | 0.277     | 0.204     | 0.215  |
| A018480_01 |    | -0.496    | -0.121   | 0.181     | 0.146     | 0.085     | 0.167     | 0.018     | 0.174  |
| A018484_01 |    | -0.726    | -0.329   | 0.435     | 0.422     | 0.077     | 0.062     | -0.011    | -0.045 |
| A018486_01 |    | -0.06     | -0.018   | 0.251     | -0.067    | 0.19      | 0.037     | 0.495     | 0.148  |
| A018488_01 |    | -0.62     | -0.454   | -0.155    | -0.251    | -0.569    | -0.357    | 0.024     | -0.139 |
| A018497_01 |    | -0.449    | -0.312   | 0.001     | 0.086     | -0.021    | 0.029     | 0.072     | 0.097  |
| A018499_01 |    | -0.293 NA |          | 0.076 NA  |           | 0.078 NA  |           | 0.178     | 0.027  |
| A018500_01 |    | 0.499     | 0.285    | -0.295    | -0.406    | 0.326     | 0.087     | 0.406     | 0.096  |
| A018501_01 |    | -0.191    | 0.031    | -0.147    | -0.195    | -0.852 NA |           | -0.352    | -0.289 |
| A018502_01 |    | 0.361     | -0.002   | -0.403    | -0.253    | -0.128    | 0.067     | -0.256    | 0.015  |
| A018505_01 |    | -0.618    | -0.677   | 0.373     | 0.237     | -0.038    | 0.169     | -0.03     | 0.083  |
| A018506_01 |    | -1.154    | -0.927   | -0.618    | -0.413    | -0.903    | -1.008    | -0.721    | -0.768 |
| A018510_01 |    | 0.606     | 0.519    | 0.325     | 0.22      | 0.217     | 0.209     | 0.321     | 0.267  |
| A018516_01 |    | 0.267     | 0.334    | 0.063     | 0.154     | 0.661     | 0.767     | 0.839     | 1.157  |
| A018517_01 |    | 0.103     | 0.112    | -0.249    | -0.061    | 0.26      | 0.305     | -0.023    | -0.079 |
| A018518_01 |    | -0.441 NA |          | 0.375     | 0.492     | 0.077 NA  |           | -0.122    | -0.117 |
| A018519_01 |    | -0.343    | 0.076    | 0.349     | 0.362     | 0.067     | 0.171     | -0.012    | 0.024  |
| A018520_01 | NA | NA        |          | 0.129     | 0.07 NA   | NA        |           | -0.581    | -0.718 |
| A018522_01 |    | -0.167    | -0.23    | 0.285     | 0.224     | -0.383    | -0.334    | -0.138    | -0.283 |
| A018523_01 |    | 0.253     | 0.101    | -0.048 NA |           | 0.148     | 0.037     | 0.193     | 0.343  |
| A018528_01 | NA | NA        |          | 0.28      | 0.081     | 0.505     | 0.306 NA  |           | 0.23   |
| A018530_01 |    | 0.496     | 0.003 NA | NA        |           | -0.279    | -0.405 NA | NA        |        |
| A018531_01 | NA | NA        |          | 0.467     | 0.276 NA  | NA        |           | 0.27      | 0.138  |
| A018533_01 |    | 0.429     | -0.077   | 0.364     | 0.293     | 0.237     | 0.084     | -0.15     | -0.082 |
| A018536_01 |    | -0.032    | 0.146    | 0.072 NA  |           | 0.215 NA  | NA        | NA        |        |
| A018545_01 |    | 0.305     | 0.064    | -0.078    | -0.087    | -0.335    | -0.334    | -0.479    | -0.559 |
| A018554_01 |    | 0.19      | 0.334    | 0.073     | 0.043     | 0.521     | 0.249     | 0.411     | 0.318  |
| A018560_01 |    | 0.484     | 0.431    | 0.162     | 0.098     | -0.076    | 0.188     | 0.067     | 0.026  |
| A018561_01 |    | -0.919    | -0.619   | 0.139     | -0.14     | -0.067    | -0.034    | 0.391     | 0.111  |
| A018563_01 | NA | NA        |          | 0.552     | 0.156 NA  | NA        |           | 0.112     | -0.199 |
| A018564_01 |    | 0.961     | 0.544    | 0.506     | 0.355     | 0.582     | 0.165     | 0.368     | 0.335  |
| A018566_01 | NA | NA        |          | 0.408     | 0.203 NA  | NA        |           | -0.085 NA |        |
| A018568_01 | NA | NA        |          | -0.239    | -0.496 NA | NA        |           | -0.391    | -0.568 |
| A018575_01 |    | 0.016     | -0.055   | -0.025    | 0.011     | -0.009    | 0.023     | -0.152    | -0.001 |
| A018581_01 |    | 0.351     | 0.354    | 0.373     | 0.249     | 0.584     | 0.291     | 0.544     | 0.523  |
| A018583_01 |    | 0.471     | 0.451    | -0.019    | -0.083    | 0.427     | 0.232     | 0.133     | 0.013  |
| A018587_01 |    | 0.754     | 0.368 NA | NA        |           | 0.433     | 0.032     | 0.325     | 0.298  |
| A018589_01 | NA | NA        |          | -0.429 NA | NA        | NA        | NA        | NA        |        |
| A018590_01 |    | -0.877    | -0.774   | 0.237     | 0.166     | 0.015 NA  |           | 0.173     | -0.061 |
| A018591_01 |    | -0.009    | -0.005   | -0.026    | -0.029    | 0.22      | 0.217     | 0.339     | 0.465  |

|            |    |        |        |        |        |        |        |        |        |        |
|------------|----|--------|--------|--------|--------|--------|--------|--------|--------|--------|
| A018598_01 | NA | NA     |        | 0.428  | -0.132 | 0.736  | NA     | 0.403  | NA     |        |
| A018600_01 |    | -1.157 | -0.93  | 0.17   | 0.249  | -2.2   | -1.727 | -1.292 |        | -1.038 |
| A018604_01 |    | -0.652 | -0.551 | 0.182  | 0.148  | -0.482 | -0.428 | -0.347 |        | -0.306 |
| A018607_01 |    | 0.198  | 0.372  | 0.959  | 0.599  | -0.489 | -0.102 | 0.293  |        | 0.164  |
| A018613_01 |    | 1.244  | 0.863  | -0.333 | NA     | -0.01  | -0.372 | NA     | NA     |        |
| A018617_01 |    | 0.085  | 0.282  | -0.163 |        | -0.03  | -0.008 | 0.22   | 0.053  | 0.149  |
| A018618_01 |    | 0.855  | 0.82   | -0.185 |        | -0.125 | 0.391  | 0.822  | 0.517  | 0.801  |
| A018620_01 |    | 0.465  | -0.081 | -0.308 |        | -0.376 | -0.249 | -0.528 | -0.154 | -0.229 |
| A018621_01 |    | -0.118 | -0.286 | -0.114 |        | -0.19  | 0.198  | -0.038 | 0.37   | 0.224  |
| A018625_01 |    | 0.314  | 0.477  | 0.429  |        | 0.316  | 0.541  | 0.512  | 0.542  | 0.424  |
| A018628_01 |    | 0.349  | 0.341  | 0.13   |        | 0.168  | 0.633  | 0.593  | 0.415  | 0.366  |
| A018630_01 |    | -0.3   | 0.063  | 0.102  |        | -0.04  | 0.307  | 0.291  | NA     | 0.123  |
| A018635_01 |    | -0.621 | -0.918 | -0.578 | NA     |        | -0.762 | -1.024 | -0.765 | -1.034 |
| A018637_01 |    | -0.231 | 0.031  | 0.282  |        | 0.251  | 0.38   | 0.363  | 0.163  | 0.134  |
| A018638_01 |    | -1.154 | -1.204 | -0.667 |        | -0.585 | -0.891 | -0.889 | -0.555 | -0.653 |
| A018647_01 |    | -0.457 | -0.075 | -0.197 |        | -0.285 | -0.235 | -0.229 | -0.088 | -0.142 |
| A018649_01 |    | -0.546 | -0.243 | 0.039  |        | -0.027 | 0.081  | -0.026 | 0.021  | 0.035  |
| A018652_01 | NA | NA     |        | 0.312  | 0.252  | NA     | NA     |        | 0.01   | -0.063 |
| A018655_01 |    | -0.084 | 0.367  | 1.013  | 0.809  | 0.743  | 0.857  | 0.494  |        | 0.437  |
| A018662_01 |    | -0.676 | -1.127 | -0.398 |        | -0.293 | -1.494 | -1.53  | -0.879 | -0.967 |
| A018663_01 |    | 0.465  | 0.213  | -0.034 |        | -0.102 | 0.053  | -0.151 | -0.039 | -0.13  |
| A018665_01 |    | 0.269  | 0.773  | -0.596 |        | -0.406 | 0.287  | 0.772  | 0.347  | 0.687  |
| A018666_01 | NA | NA     |        | 0.336  | 0.164  | NA     | NA     |        | -0.075 | -0.331 |
| A018667_01 |    | -0.477 | -0.364 | 0.319  |        | -0.087 | 0.181  | 0.042  | 0.325  | -0.142 |
| A018672_01 |    | 0.469  | 0.77   | 0.409  |        | 0.311  | 0.329  | 0.05   | -0.044 | -0.148 |
| A018673_01 |    | -0.68  | -0.682 | -0.997 |        | -0.702 | -0.764 | -0.654 | -1.378 | -1.504 |
| A018675_01 | NA | NA     |        | -0.062 | -0.054 | NA     | NA     |        | -0.108 | -0.247 |
| A018678_01 |    | 0.364  | 0.273  | -0.28  |        | -0.28  | -0.022 | -0.066 | 0.089  | -0.038 |
| A018682_01 |    | 0.353  | 0.242  | -0.005 |        | 0.063  | 0.321  | 0.372  | 0.248  | 0.534  |
| A018686_01 | NA | NA     |        | -0.122 | -0.207 | NA     |        | -0.108 | -0.176 | -0.316 |
| A018687_01 | NA | NA     |        | 1.298  | 0.899  | -0.515 | NA     |        | -0.219 | NA     |
| A018688_01 |    | -0.003 | 0.324  | -0.231 |        | -0.088 | 0.01   | 0.546  | 0.472  | 0.751  |
| A018694_01 | NA | NA     |        | 0.152  | -0.151 | NA     | NA     | NA     |        | -0.909 |
| A018696_01 |    | -0.406 | -0.153 | 0.042  |        | 0.022  | 0.082  | 0.187  | 0.316  | 0.275  |
| A018699_01 |    | -0.545 | -0.208 | -0.164 |        | -0.235 | 0.561  | 0.575  | 0.683  | 0.629  |
| A018707_01 |    | -0.227 | -0.284 | 0.17   |        | 0.072  | 0.057  | 0.08   | 0.001  | -0.1   |
| A018708_01 |    | -0.052 | 0.227  | -0.296 |        | -0.091 | 0.009  | 0.393  | 0.036  | 0.318  |
| A018709_01 |    | 0.186  | 0.414  | 0.163  |        | 0.263  | 1.207  | 1.153  | 1.089  | 1.157  |
| A018710_01 |    | 0.373  | 0.123  | 0.197  |        | 0.096  | 0.268  | -0.066 | 0.087  | -0.146 |
| A018711_01 | NA |        | -1.218 | -1.186 |        | -1.103 | -0.751 | -0.916 | -0.713 | -0.777 |
| A018712_01 |    | -1.197 | -0.739 | -0.004 |        | 0.011  | -0.621 | -0.228 | -0.136 | -0.163 |
| A018714_01 |    | 0.39   | 0.563  | -0.749 |        | -0.448 | 0.662  | 0.497  | 0.178  | 0.282  |
| A018715_01 |    | 0.757  | 0.657  | 0.25   |        | 0.452  | 0.901  | 1.092  | 0.708  | 0.79   |
| A018717_01 |    | 0.421  | 0.129  | 0.004  |        | -0.033 | 0.135  | -0.034 | -0.379 | -0.342 |
| A018720_01 |    | -0.216 | -0.351 | -0.047 |        | -0.115 | 0.24   | 0.055  | 0.542  | 0.512  |
| A018723_01 |    | 0.121  | 0.149  | 0.082  |        | -0.148 | 0.605  | 0.269  | 0.439  | 0.269  |
| A018737_01 |    | -1.047 | -0.741 | 0.112  |        | -0.107 | -0.179 | -0.274 | 0.217  | -0.017 |
| A018742_01 |    | 0.134  | 0.19   | 0.289  |        | 0.237  | -0.189 | -0.31  | 0.041  | -0.069 |
| A018746_01 |    | 0.195  | 0.439  | 0.31   | NA     |        | 0.588  | NA     | 0.38   | NA     |
| A018753_01 |    | 0.326  | 0.319  | 0.509  |        | 0.533  | 0.522  | 0.44   | 0.194  | 0.389  |
| A018758_01 |    | -0.508 | -0.161 | 0.139  |        | 0.152  | 0.207  | 0.173  | -0.048 | 0.067  |
| A018771_01 |    | 0.305  | 0.306  | 0.341  |        | 0.315  | 0.226  | 0.313  | 0.55   | 0.489  |
| A018772_01 |    | 0.014  | 0.034  | 0.202  |        | 0.175  | -0.243 | -0.222 | 0.009  | -0.069 |
| A018774_01 |    | 0.467  | 0.586  | -0.689 |        | -0.716 | 0.157  | 0.515  | 0.803  | 0.805  |
| A018778_01 |    | 0.242  | -0.013 | 0.118  |        | -0.006 | -0.08  | 0.003  | 0.043  | -0.135 |
| A018779_01 |    | 0.109  | 0.201  | -0.038 |        | -0.279 | 0.245  | 0.062  | 0.571  | 0.178  |
| A018781_01 |    | 0.04   | -0.002 | -0.231 |        | -0.021 | 0.182  | 0.405  | 0.815  | 1.418  |
| A018786_01 |    | -0.765 | -0.177 | -0.032 |        | -0.076 | 0.306  | 0.437  | 0.504  | 0.478  |
| A018793_01 | NA | NA     |        | 0.24   | 0.119  | NA     |        | 0.161  | 0.039  | -0.095 |
| A018795_01 | NA | NA     |        | 0.11   | -0.067 | NA     | NA     |        | -0.355 | -0.642 |
| A018803_01 |    | -0.222 | -0.185 | -0.454 |        | -0.395 | -0.503 | -0.035 | 0.036  | -0.073 |
| A018807_01 |    | -0.303 | NA     | -0.513 |        | -0.506 | -0.302 | NA     | 0.063  | 0.017  |
| A018809_01 |    | -0.396 | -0.248 | -0.239 |        | -0.037 | -0.33  | -0.196 | -0.195 | -0.034 |
| A018810_01 |    | -0.018 | NA     | 0.179  | NA     |        | 0.143  | NA     | 0.257  | NA     |
| A018812_01 |    | 0.328  | 0.443  | 0.073  |        | 0.074  | 0.321  | 0.174  | 0.177  | 0.079  |
| A018814_01 |    | 0.653  | 0.649  | 0.276  |        | 0.025  | 0.748  | 0.587  | 0.532  | 0.326  |
| A018815_01 |    | -0.618 | -0.357 | 0.223  |        | 0.073  | -0.229 | NA     | 0.024  | -0.177 |
| A018816_01 |    | 0.381  | NA     | 0.192  | NA     |        | -0.41  | NA     | NA     | NA     |

|            |    |           |        |           |           |           |           |           |        |
|------------|----|-----------|--------|-----------|-----------|-----------|-----------|-----------|--------|
| A018818_01 |    | -0.048    | 0.095  | 0.004     | 0.19      | -0.067    | 0.461     | 0.35      | 0.688  |
| A018819_01 | NA |           |        | 0.408     | 0.1 NA    |           |           | -0.129    | -0.529 |
| A018820_01 | NA |           |        | 0.247     | 0.11      | -0.605 NA |           | -0.114    | -0.293 |
| A018823_01 |    | 0.754     | 0.938  | 0.513     | 0.252     | 0.639     | 0.499     | 0.675     | 0.544  |
| A018826_01 |    | 0.404     | 0.376  | -0.246    | -0.219    | 0.199     | 0.001     | 0.231     | 0.257  |
| A018827_01 |    | -0.251    | 0.16   | 0.71      | 0.544     | 0.886     | 0.905     | 0.533     | 0.512  |
| A018828_01 |    | -0.237    | 0.166  | 0.331 NA  |           | 0.251     | 0.035     | 0.202     | 0.044  |
| A018832_01 |    | 0.107     | 0.014  | 0.318     | 0.126     | 0.291 NA  |           | 0.107 NA  |        |
| A018833_01 |    | -0.319    | -0.123 | -0.581    | -0.559    | -0.562    | -0.566    | -0.255    | -0.362 |
| A018834_01 |    | 0.229     | 0.251  | 0.182     | -0.001    | -0.208    | 0.016     | -0.098    | -0.392 |
| A018840_01 |    | -1.077    | -0.977 | -0.102    | -0.083    | -1.065    | -0.824    | -0.413    | -0.539 |
| A018841_01 |    | 0.263     | 0.592  | 0.27      | 0.435     | 0.289     | 0.517     | 0.253     | 0.436  |
| A018842_01 |    | -0.597    | -0.174 | 0.126     | -0.004    | -0.145    | -0.266    | -0.283    | -0.42  |
| A018844_01 |    | -0.634    | -0.188 | -0.395    | -0.297    | -0.637    | -0.352    | -0.305    | -0.355 |
| A018848_01 |    | 0.4       | 0.168  | -0.221    | -0.367    | 0.028     | 0.073     | 0.198     | 0.13   |
| A018849_01 |    | 0.18 NA   |        | -1.321    | -1.201    | 0.298 NA  |           | -1.104 NA |        |
| A018851_01 |    | -0.573    | -0.136 | 0.347     | 0.247     | -0.013    | 0.05      | 0.038     | -0.156 |
| A018852_01 | NA |           | 0.211  | 0.671     | 0.499 NA  |           | 0.173     | 0.028     | -0.073 |
| A018862_01 |    | -0.583    | -0.375 | 0.032     | 0.149     | -0.478    | -0.223    | -0.177    | -0.12  |
| A018863_01 |    | -0.463    | -0.295 | 0.1       | -0.037    | 0.035     | 0.06      | 0.208     | -0.113 |
| A018864_01 |    | -0.226    | -0.119 | 0.278     | -0.067    | -0.049    | -0.15     | 0.485     | 0.098  |
| A018867_01 |    | 0.465     | 0.316  | -0.331    | -0.219    | -0.001    | -0.086    | -0.179    | -0.017 |
| A018869_01 |    | -2.007 NA |        | -1.275    | -1.103 NA |           |           | -1.729    | -1.594 |
| A018871_01 | NA |           | 0.166  | -0.537    | -0.634    | -0.032    | 0.069     | -0.109    | -0.16  |
| A018875_01 |    | -0.579    | -0.51  | -0.004    | -0.011    | 0.138     | 0.367     | 0.035     | 0.08   |
| A018889_01 |    | 0.199     | 0.118  | 0.164     | 0.008     | 0.031     | -0.124    | 0.117     | -0.032 |
| A018891_01 |    | -3.265 NA | NA     | NA        |           | -3.23     | -2.739 NA | NA        |        |
| A018894_01 | NA |           | 0.321  | -0.181    | -0.096 NA |           | -0.381    | -0.335    | -0.299 |
| A018896_01 |    | -0.296    | 0.047  | 0.167     | 0.162     | -0.086    | 0.089     | 0.087     | 0.204  |
| A018897_01 |    | 0.143     | 0.198  | 0.329     | 0.061     | 0.356     | 0.351     | 0.07      | -0.056 |
| A018899_01 |    | 0.188     | 0.385  | -0.064    | -0.152    | 0.583     | 0.438     | 0.726     | 0.537  |
| A018904_01 |    | 0.406     | 0.261  | 0.202     | 0.153     | 0.179     | 0.139     | 0.17      | 0.203  |
| A018906_01 |    | -1.147    | -0.862 | -0.086    | -0.192    | -0.514    | -0.424    | -0.335    | -0.485 |
| A018908_01 |    | -0.454    | -0.397 | -0.193    | -0.393    | -0.004    | -0.175    | 0.338     | 0.066  |
| A018909_01 |    | -0.786    | -1.035 | -1.07     | -0.849    | -0.861    | -1.051    | -0.958    | -0.975 |
| A018911_01 |    | -0.576    | 0.466  | 0.449     | 0.345     | 0.155     | 0.968     | 0.701     | 0.699  |
| A018912_01 |    | -0.521    | -0.227 | 0.049     | -0.083    | -0.482    | -0.331    | -0.217    | -0.289 |
| A018914_01 |    | 0.693     | 0.301  | 0.217     | 0.035     | 0.56      | 0.321     | 0.248     | 0.242  |
| A018915_01 |    | -0.38     | -0.755 | -1.384    | -1.265    | -1.33     | -1.152    | -0.76     | -0.907 |
| A018919_01 |    | -0.333    | -0.156 | -0.092    | -0.201    | -0.486    | -0.314    | 0.198     | 0.129  |
| A018920_01 | NA |           |        | 0.344     | 0.245     | 0.194     | -0.033    | 0.049     | -0.103 |
| A018921_01 |    | 0.173     | 0.213  | 0.626 NA  |           | 0.671     | 0.353     | 0.68 NA   |        |
| A018922_01 |    | -0.497    | -0.484 | -0.642    | -0.616    | -0.396    | -0.28     | -0.132    | -0.145 |
| A018924_01 |    | -0.222    | -0.111 | 0.305     | -0.025    | -0.357    | -0.414    | -0.128    | -0.446 |
| A018925_01 |    | -0.342    | -0.041 | 0.202     | 0.364     | 0.529     | 0.563     | 0.305     | 0.495  |
| A018931_01 |    | -0.129    | -0.322 | 0.086     | 0.088     | -0.953    | -1.005    | -0.387    | -0.483 |
| A018932_01 |    | -0.622    | -0.142 | -0.481    | -0.37     | 0.137     | 0.296     | 0.701     | 0.651  |
| A018933_01 |    | 0.494     | 0.342  | -0.147    | -0.067    | 1.128     | 0.765     | 0.88      | 0.907  |
| A018934_01 |    | -0.689    | -0.747 | -0.949    | -0.646    | -0.559    | -0.413    | -1.115    | -1.183 |
| A018935_01 |    | 0.781     | 0.994  | -0.296 NA |           | 0.8       | 0.808     | 0.955     | 0.961  |
| A018936_01 |    | 0.348     | 0.286  | 0.226     | 0.145     | 0.2       | 0.067     | -0.048    | -0.072 |
| A018937_01 |    | 1.23      | 0.872  | 0.06      | -0.027    | 1.098     | 1.037     | 1.161     | 1.223  |
| A018942_01 |    | -0.124    | 0.11   | 0.758     | 0.555     | 0.627     | 0.428     | 0.089     | 0.014  |
| A018949_01 |    | 0.28      | 0.382  | 0.47      | 0.292     | 0.218     | 0.053     | -0.22     | -0.479 |
| A018950_01 |    | 0.095     | 0.15   | -0.389    | -0.281    | -0.544    | -0.022    | -0.049    | 0.127  |
| A018952_01 |    | 0.07      | 0.135  | 0.056     | 0.207     | -0.048    | 0.276     | 0.041     | 0.345  |
| A018955_01 |    | 0.036     | -0.463 | -0.186    | -0.312    | -0.344    | -0.427    | -0.178    | -0.073 |
| A018959_01 |    | -0.18     | -0.155 | 0.252     | 0.012     | 0.156     | 0.125     | 0.282     | 0.057  |
| A018961_01 | NA |           |        | -0.013 NA |           | NA        |           | NA        |        |
| A018963_01 | NA |           |        | 0.306     | 0.192 NA  |           |           | -0.405    | -0.531 |
| A018964_01 |    | -0.336    | -0.217 | 0.682     | 0.381     | 0.485     | 0.26      | 0.088     | -0.041 |
| A018970_01 |    | 0.384     | 0.263  | 0.225     | 0.185     | 0.169 NA  |           | NA        |        |
| A018973_01 |    | 0.357     | 0.223  | 0.194     | 0.068     | 0.448     | 0.088     | -0.062    | -0.127 |
| A018974_01 |    | -0.705    | -0.553 | 0.161     | 0.032     | -0.085    | -0.05     | -0.056    | -0.075 |
| A018975_01 |    | 0.856     | 0.734  | -0.571    | -0.552    | 0.62      | 0.389     | 0.583     | 0.455  |
| A018979_01 | NA |           |        | -0.182    | -0.243 NA |           |           | -0.217    | -0.275 |
| A018982_01 |    | 0.43      | 0.286  | 0.042     | 0.018     | 0.352     | 0.208     | 0.411     | 0.286  |
| A018983_01 |    | -0.525 NA |        | 0.061     | -0.328    | -0.205    | -0.28     | 0.012     | -0.357 |



|            |    |           |          |           |           |           |           |           |        |
|------------|----|-----------|----------|-----------|-----------|-----------|-----------|-----------|--------|
| A018986_01 |    | 0.277     | 0.49     | 0.078     | -0.003    | 0.273     | 0.138 NA  |           | 0.192  |
| A018988_01 |    | 0.064     | 0.184    | -0.344    | -0.254    | 0.105     | -0.002    | 0.111     | 0.168  |
| A018991_01 |    | -1.114 NA |          | -0.029    | 0.148     | -0.704 NA |           | 0.03      | 0.1    |
| A018992_01 |    | -0.246    | -0.137   | -0.298    | -0.203    | -0.074    | -0.148    | -0.143    | -0.203 |
| A018998_01 | NA | NA        |          | 0.324     | 0.006 NA  |           | 0.128     | 0.115     | -0.252 |
| A019000_01 |    | 0.477     | 0.425    | 0.277     | 0.283     | 0.616     | 0.412     | 0.325     | 0.351  |
| A019002_01 |    | -1.573    | -1.58 NA | NA        | NA        |           | -1.794 NA | NA        |        |
| A019012_01 |    | 0.349     | 0.231    | 0.153     | 0.066     | 0.132     | -0.054    | 0.148     | 0.068  |
| A019014_01 |    | 0.228     | 0.397    | 0.422     | 0.329     | 0.869     | 0.783     | 0.815     | 0.805  |
| A019017_01 | NA | NA        |          | 0.283 NA  | NA        | NA        |           | 0.267     | 0.053  |
| A019021_01 |    | 0.476     | 0.278    | 0.229     | 0.032     | 0.494     | 0.234     | 0.373     | 0.311  |
| A019022_01 |    | -0.198 NA |          | 0.849     | 0.573     | -0.141    | -0.311    | 0.051     | 0.003  |
| A019026_01 | NA | NA        |          | -0.045    | -0.342 NA | NA        |           | -0.086    | -0.26  |
| A019027_01 |    | -1.738    | -1.567   | -0.167    | -0.437    | -1.276    | -1.378    | -0.486    | -0.713 |
| A019032_01 |    | 0.259     | 0.008    | -0.462    | -0.454    | -0.675    | -0.598    | -0.488    | -0.362 |
| A019033_01 | NA | NA        |          | -0.277 NA | NA        | NA        | NA        | NA        |        |
| A019040_01 |    | 0.203     | 0.128    | -0.022    | 0.016     | 0.117     | -0.126    | 0.07      | -0.053 |
| A019041_01 |    | 0.038     | -0.101   | -0.321    | -0.096    | -0.907    | -0.756    | -0.536    | -0.124 |
| A019043_01 | NA | NA        |          | 0.453     | 0.441 NA  |           | 1.173     | 0.745     | 0.9    |
| A019046_01 |    | -0.253    | 0.001    | 0.775     | 0.72      | 0.596     | 0.672     | -0.125    | 0.06   |
| A019047_01 | NA | NA        |          | -0.346    | -0.307 NA | NA        |           | -0.384    | -0.446 |
| A019049_01 |    | 0.217     | 0.124    | 0.357     | 0.085 NA  |           | 0.24      | 0.339     | 0.136  |
| A019050_01 |    | 1.206     | 0.71     | 0.297     | 0.296     | 0.147     | 0.13      | 0.039     | 0.228  |
| A019053_01 |    | -1.143    | -0.683   | -0.321    | -0.267    | -0.534    | -0.652    | -0.491    | -0.478 |
| A019057_01 |    | 0.321     | 0.575    | 0.213     | 0.187     | 0.631     | 0.54      | 0.424     | 0.55   |
| A019059_01 |    | 0.734     | 0.301    | 0.284     | 0.055     | 0.665     | 0.301     | 0.217     | 0.003  |
| A019060_01 |    | -0.16     | 0.186    | -0.06     | 0.028     | 0.021     | 0.185     | -0.098    | 0.117  |
| A019064_01 |    | 0.159     | 0.169    | 0.279     | 0.196     | -0.387    | -0.251    | -0.085    | -0.192 |
| A019068_01 | NA |           | -0.073   | 0.235     | 0.007 NA  | NA        |           | -0.129 NA |        |
| A019074_01 |    | 0.411 NA  |          | -0.478    | -0.522    | 0.729 NA  |           | 0.103     | -0.211 |
| A019081_01 |    | -0.465 NA |          | 0.197     | 0.051 NA  |           | -0.013    | 0.164     | 0.126  |
| A019086_01 |    | 0.4       | 0.366    | 0.325     | 0.128     | 0.324     | 0.557     | 0.678     | 0.746  |
| A019089_01 | NA | NA        |          | -0.049    | -0.05     | -0.791 NA | NA        |           | -0.092 |
| A019092_01 |    | -1.068    | -0.823   | 0.121     | -0.058    | -0.48     | -0.43     | 0.119     | 0.006  |
| A019094_01 |    | -0.031    | 0.222    | 0.426     | 0.255     | 0.664     | 0.577     | 0.439     | 0.3    |
| A019098_01 |    | 0.308     | -0.119   | 0.026     | -0.175    | -0.068    | -0.368    | -0.006    | -0.204 |
| A019106_01 |    | 0.095     | 0.013    | -0.144    | -0.273    | -0.213    | -0.364    | 0.014     | -0.15  |
| A019110_01 |    | 0.266     | 0.368    | -0.22     | -0.113    | 0.057     | 0.416     | 0.392     | 0.671  |
| A019116_01 |    | -0.216    | -0.139   | 0.131     | 0.018     | 0.106     | -0.064    | -0.08     | -0.141 |
| A019127_01 |    | -0.373    | -0.795   | -0.564    | -0.613 NA | NA        |           | -0.53     | -0.829 |
| A019139_01 | NA |           | 0.368    | 0.297     | 0.225 NA  |           | 0.138     | 0.545     | 0.458  |
| A019143_01 |    | 0.017     | -0.43    | 0.018     | -0.221    | -0.389    | -0.631    | -0.168    | -0.517 |
| A019145_01 |    | -1.348    | -1.393   | -1.309    | -1.238    | -1.675    | -1.481    | -0.921    | -0.861 |
| A019146_01 |    | 0.876     | 0.28     | 0.074     | -0.354    | 0.442     | 0.084     | 0.423     | 0.344  |
| A019151_01 |    | -0.052    | -0.215   | -0.44     | -0.632    | -0.366    | -0.325    | -0.158    | -0.317 |
| A019155_01 |    | 0.684     | 0.09     | -0.235    | -0.274    | 0.037     | -0.181    | -0.082    | -0.176 |
| A019171_01 | NA | NA        |          | 0.221     | 0.238 NA  | NA        |           | -0.15     | -0.041 |
| A019174_01 | NA |           | 0.185    | 0.1       | -0.039 NA |           | 0.708     | 0.789     | 0.828  |
| A019181_01 |    | 0.347     | 0.009    | 0.295     | -0.07     | 0.35      | 0.056     | 0.206     | -0.073 |
| A019186_01 | NA | NA        |          | -2.829 NA | NA        | NA        |           | -2.152    | -2.715 |
| A019187_01 | NA |           | -1.196   | -0.4      | -0.362 NA |           | -0.681    | -0.286    | -0.532 |
| A019188_01 |    | 0.375     | 0.41     | -0.123    | -0.217    | -0.083    | -0.34     | -0.173    | -0.455 |
| A019192_01 |    | -0.822    | -0.505   | 0.098     | 0.036     | 0.089     | -0.066    | 0.315     | 0.21   |
| A019196_01 | NA | NA        |          | 0.099 NA  | NA        |           | 0.134     | 0.045 NA  |        |
| A019200_01 | NA |           | -0.258   | 0.129     | 0.16 NA   | NA        |           | -0.286    | -0.109 |
| A019206_01 |    | -0.244    | -0.256   | -0.121    | -0.197    | 0.246     | 0.027     | 0.354     | 0.202  |
| A019211_01 |    | -0.287    | -0.004   | 0.379     | 0.322     | 0.213     | -0.001    | -0.014    | -0.046 |
| A019213_01 |    | 0.276     | 0.809    | 0.087     | 0.05      | 0.039     | 0.888     | 0.486     | 0.539  |
| A019216_01 |    | 0.538     | 0.317    | 0.107     | -0.037    | 0.53      | 0.362     | 0.487     | 0.56   |
| A019229_01 |    | -0.474    | -0.33    | 0.194     | 0.412     | 0.079     | -0.095    | -0.212    | -0.14  |
| A019231_01 |    | -0.086    | -0.124   | 0.337 NA  |           | -0.251    | -0.341    | 0.191 NA  |        |
| A019244_01 | NA | NA        |          | -0.202    | -0.107 NA |           | 0.016     | -0.077    | 0.065  |
| A019247_01 |    | 0.626     | 0.407    | -0.176    | -0.083    | -0.009    | 0.152     | -0.407    | -0.261 |
| A019249_01 |    | -0.439    | 0.036    | 0.322     | 0.299     | -0.04     | 0.252     | 0.023     | -0.009 |
| A019252_01 |    | 0.47      | 0.681    | 0.016     | 0.237     | 0.231     | 0.696     | 0.096     | 0.485  |
| A019253_01 |    | 0.287     | 0.183    | 0.002     | 0.114     | 0.222     | 0.102     | -0.036    | -0.045 |
| A019255_01 |    | -0.223 NA |          | 0.459     | 0.395     | 0.267 NA  |           | -0.073    | -0.189 |
| A019261_01 |    | -0.714    | -0.753   | -0.278    | -0.434    | -0.739    | -0.9      | -0.351    | -0.59  |

|            |    |           |           |           |           |          |          |           |        |
|------------|----|-----------|-----------|-----------|-----------|----------|----------|-----------|--------|
| A019274_01 | NA |           | -0.126    | 0.272     | 0.217 NA  |          | 0.92     | 0.725     | 0.678  |
| A019281_01 |    | -0.771    | -0.631    | -0.029    | -0.164    | -0.065   | -0.051   | 0.167     | -0.092 |
| A019289_01 |    | 0.038     | 0.065     | 0.185     | 0.1       | -0.095   | -0.156   | -0.099    | -0.278 |
| A019291_01 |    | -0.281    | 0.027     | 0.063     | 0.171     | -0.171   | -0.468   | -0.168    | -0.319 |
| A019293_01 | NA | NA        |           | 0.111     | -0.008 NA | NA       |          | 0.112     | 0.044  |
| A019301_01 |    | -0.996 NA |           | 0.337     | 0.295     | 0.229    | 0.053    | 0.062     | 0.097  |
| A019303_01 | NA | NA        |           | 0.291     | -0.096 NA |          | 0.125    | 0.134     | -0.045 |
| A019305_01 |    | -1.626    | -1.845 NA | NA        |           | -1.773   | -2.088   | -2.356 NA |        |
| A019308_01 |    | -0.412    | -0.086    | -1.067    | -0.722    | -0.293   | 0.085    | -0.038    | -0.081 |
| A019312_01 | NA |           | -0.185    | 0.306     | 0.348     | 0.274    | 0.245    | 0.24      | 0.158  |
| A019318_01 |    | -0.12     | 0.084     | 0.49      | 0.412     | 0.293    | 0.263    | 0.091     | 0.052  |
| A019324_01 | NA |           | -0.937    | -0.332    | -0.371 NA |          | -1.278   | -0.974    | -1.111 |
| A019325_01 |    | -0.197    | -0.189    | -0.288    | -0.237    | 0.171    | 0.215    | 0.113     | 0.061  |
| A019326_01 |    | 0.461     | 0.381     | 0.255     | 0.024     | 0.207    | 0.004    | -0.012    | -0.06  |
| A019328_01 | NA |           | 0.714     | 0.182     | 0.157     | 0.628    | 0.632    | 0.275     | 0.469  |
| A019330_01 |    | -0.713    | -0.648    | -0.043    | 0.074     | -0.565   | -0.581   | -0.513    | -0.614 |
| A019331_01 |    | -0.11     | 0.43      | 0.435     | 0.365     | 1.082    | 0.878    | 1.036     | 0.998  |
| A019336_01 |    | -1.113    | -0.626    | 0.223     | 0.225     | 0.183    | 0.15     | -0.046    | -0.099 |
| A019338_01 |    | 0.15      | 0.1       | 0.358     | 0.293     | 0.097 NA |          | 0.152     | 0.136  |
| A019340_01 |    | 0.042     | -0.148    | 0.045     | 0.047     | -0.204   | -0.236   | -0.193    | 0.061  |
| A019343_01 |    | -0.11     | 0.012     | -0.155    | -0.157    | -0.158   | -0.12    | -0.057    | -0.286 |
| A019353_01 | NA | NA        |           | 0.607     | 0.083 NA  | NA       |          | 0.126     | -0.138 |
| A019356_01 | NA | NA        |           | 0.579     | 0.348     | 0.795 NA |          | 0.66      | 0.468  |
| A019358_01 |    | -0.003    | -0.059    | -0.591    | -0.694    | -0.222   | -0.163   | -0.018    | -0.147 |
| A019361_01 |    | -1.015    | -0.449    | -0.137    | -0.159    | 0.338    | 0.34     | 0.624     | 0.468  |
| A019367_01 |    | -0.482    | -0.282    | 0.039     | -0.001    | 0.158    | 0.083    | 0.3       | 0.163  |
| A019372_01 |    | 0.475     | 0.37      | 0.073     | -0.042    | 0.202    | 0.37     | 0.28      | 0.089  |
| A019383_01 |    | 0.136     | 0.251     | -0.008    | -0.105    | 0.327    | 0.417    | 0.277     | 0.266  |
| A019387_01 |    | -0.173    | -0.16     | 0.085     | -0.042    | 0.151    | 0.162    | 0.056     | 0.074  |
| A019395_01 |    | 0.055     | 0.027     | 0.187     | 0.124     | 0.774    | 0.316    | 0.656     | 0.685  |
| A019398_01 | NA |           | -1.42     | -0.228    | -0.303    | -0.973   | -0.868   | -0.386    | -0.586 |
| A019400_01 | NA |           | -0.224    | 0.297     | 0.249 NA  |          | -0.189   | -0.514    | -0.331 |
| A019403_01 | NA | NA        |           | -0.327    | -0.262    | 0.297 NA |          | 0.434     | 0.41   |
| A019407_01 |    | -0.075    | 0.08      | 0.311     | 0.362     | -0.044   | 0.022    | 0.411     | 0.514  |
| A019411_01 |    | 0.782     | 0.727     | 0.017     | -0.032    | 0.545    | 0.304    | 0.263     | 0.366  |
| A019414_01 |    | 0.666     | 0.399     | 0.253     | 0.226     | 0.356    | 0.298    | 0.471     | 0.404  |
| A019419_01 |    | -0.477 NA |           | 0.231     | 0.275     | 0.494    | 0.14     | 0.046     | 0.1    |
| A019423_01 |    | 0.669     | 0.526     | 0.318     | 0.251     | 0.742    | 0.571    | 0.706     | 0.6    |
| A019424_01 | NA | NA        |           | 0.182     | 0.058     | 1.105    | 0.767    | 0.564     | 0.662  |
| A019425_01 |    | 0.064     | 0.114     | -0.993    | -0.751    | -0.076   | -0.046   | -0.023    | 0.234  |
| A019428_01 | NA |           | -0.498    | -0.425    | -0.554 NA |          | -0.403   | -0.137    | -0.258 |
| A019429_01 |    | 0.723     | 0.543     | -0.838 NA |           | 0.583    | 0.714    | 0.868     | 1.13   |
| A019431_01 |    | -0.209    | -0.305    | 0.441     | 0.303     | 0.031    | -0.246   | -0.275    | -0.501 |
| A019436_01 |    | -0.156    | -0.144    | -0.325    | -0.154    | 0.039    | 0.238    | 0.101     | 0.46   |
| A019438_01 |    | -0.702    | -0.282    | 0.262     | 0.155     | -0.153   | -0.236   | 0.113     | -0.037 |
| A019442_01 | NA | NA        |           | -0.057    | -0.385 NA | NA       | NA       | NA        | NA     |
| A019443_01 |    | 0.457     | 0.103     | -0.039    | -0.148    | -0.02    | -0.235   | -0.05     | -0.005 |
| A019444_01 |    | 0.406     | 0.753     | -0.148    | 0.047     | 0.282    | 0.86     | 0.411     | 0.92   |
| A019445_01 |    | -0.071    | 0.031     | 0.644     | 0.41      | 0.007    | 0.088    | 0.061     | -0.126 |
| A019447_01 |    | -0.112 NA |           | -0.938 NA |           | -0.659   | -0.43    | -0.339 NA |        |
| A019451_01 |    | 1.432     | 1.453     | -0.779    | -0.525    | -0.191   | 0.288    | -0.005    | 0.379  |
| A019456_01 | NA |           | 0.27      | 0.26      | 0.241 NA  |          | 0.29     | 0.086     | 0.191  |
| A019457_01 |    | 0.398     | 0.418     | 0.287     | 0.305     | 0.429    | 0.67     | 0.679     | 0.852  |
| A019458_01 |    | 0.803     | 0.524     | -0.33     | -0.325    | -0.066   | -0.2     | -0.028    | -0.106 |
| A019460_01 |    | 0.139     | 0.171     | 0.428     | 0.241     | 0.276    | 0.266    | 0.426     | 0.347  |
| A019461_01 |    | -0.233    | -0.227    | 0.194     | 0.257     | -0.551   | -0.311   | -0.504    | -0.434 |
| A019465_01 | NA | NA        |           | 0.156     | 0.011 NA  | NA       |          | -0.021    | -0.224 |
| A019466_01 |    | -0.766    | -0.318    | 0.355     | 0.326     | 0.432    | 0.404    | 0.147     | 0.245  |
| A019469_01 |    | -0.901    | -0.816    | -0.545    | -0.359    | -0.69    | -0.641   | -0.742    | -0.647 |
| A019472_01 |    | 0.825     | 1.141     | 0.397     | 0.476     | 0.794    | 1.438    | 1.33      | 1.831  |
| A019474_01 |    | 0.438     | 0.621     | 0.265     | 0.274     | 0.594    | 0.677    | 0.869     | 0.981  |
| A019475_01 |    | -0.187    | 0.048     | -0.559    | -0.466    | -0.149   | -0.469   | -0.021    | -0.012 |
| A019480_01 |    | -0.794    | -0.905    | -0.526    | -0.471    | -1.061   | -1.085   | -0.585    | -0.713 |
| A019485_01 |    | -1.219    | -1.169    | -0.143 NA |           | -1.102   | -1.11 NA | NA        |        |
| A019491_01 |    | 0.185     | -0.029    | -1.083    | -0.713    | -0.998   | -1       | -0.767    | -0.49  |
| A019493_01 | NA | NA        |           | -0.214    | -0.289 NA | NA       |          | -0.118 NA |        |
| A019495_01 | NA | NA        |           | 0.248     | 0.132 NA  | NA       |          | 0.089     | 0.216  |
| A019496_01 |    | -0.168    | -0.446    | -1.12     | -0.718    | -0.724   | -0.536   | -0.914    | -0.793 |

|            |    |           |           |           |           |          |           |           |        |
|------------|----|-----------|-----------|-----------|-----------|----------|-----------|-----------|--------|
| A019497_01 |    | 0.204     | 0.097     | -0.164    | -0.172    | 0.412    | 0.281     | 0.258     | 0.382  |
| A019500_01 | NA | NA        |           | 0.166     | 0.121 NA  | NA       |           | -0.061    | -0.107 |
| A019502_01 |    | -0.389    | -0.288    | -0.135    | -0.078    | -0.413   | -0.406    | -0.066    | -0.168 |
| A019505_01 |    | -0.361    | -0.355    | -0.037    | -0.155    | -0.236   | -0.38     | 0.025     | -0.211 |
| A019510_01 |    | 0.363     | 0.602     | 0.068     | 0.177     | -0.122   | 0.289     | 0.284     | 0.371  |
| A019513_01 |    | -0.783    | -0.715    | 0.179     | 0.029     | 0.934    | 0.372     | 0.787     | 0.513  |
| A019514_01 |    | 0.337     | 0.087     | -0.199    | -0.037    | 0.108    | 0.109     | -0.01     | 0.144  |
| A019515_01 |    | 0.259     | 0.47      | 0.253     | 0.188     | 0.609    | 0.759     | 0.622     | 0.758  |
| A019517_01 | NA | NA        |           | -0.603    | -0.439    | -0.451   | -0.472    | -0.424    | -0.662 |
| A019520_01 |    | 0.832     | 0.467     | 0.363 NA  |           | 0.811    | 0.877     | 1.039     | 1.076  |
| A019521_01 |    | -0.451    | -0.565    | 0.118     | 0.125     | -0.473   | -0.453    | -0.261    | -0.29  |
| A019524_01 |    | 0.917     | 0.518     | -0.297 NA |           | 0.559    | 0.417     | 0.676     | 0.776  |
| A019525_01 | NA |           | -0.452    | 0.044     | -0.104 NA |          | -0.262    | -0.122    | -0.181 |
| A019526_01 |    | 0.599     | 0.402     | 0.456     | 0.255     | 0.545    | 0.271     | 0.129     | -0.049 |
| A019531_01 | NA | NA        |           | -0.768    | -0.735 NA |          | 0.29      | 0.276     | 0.198  |
| A019532_01 |    | 0.657     | 0.823     | -0.391    | -0.358 NA |          | 0.663     | 0.686     | 0.563  |
| A019537_01 |    | 0.899     | 0.79      | 0.015 NA  |           | 0.645    | 0.397     | 0.237     | 0.381  |
| A019538_01 |    | -0.463    | -0.776 NA | NA        |           | -2.151   | -1.964 NA | NA        |        |
| A019543_01 |    | -0.062    | -0.31     | -1.199    | -0.929    | -0.349   | -0.342    | -1.228    | -1.225 |
| A019544_01 |    | -1.006    | -0.667    | -0.031    | -0.137    | 0.026    | 0.122     | 0.006     | -0.061 |
| A019556_01 | NA | NA        |           | 0.243     | 0.298 NA  | NA       |           | 0.207     | 0.203  |
| A019557_01 | NA |           | 0.218     | -0.238    | -0.007 NA |          | 0.05      | -0.057    | 0.049  |
| A019559_01 |    | 0.574     | 0.219     | 0.44      | 0.176     | 0.406    | 0.328     | 0.742     | 0.502  |
| A019560_01 |    | 0.68      | 0.454     | 0.604     | 0.45      | 0.825    | 0.626     | 0.552     | 0.519  |
| A019562_01 |    | -1.25     | -2.387 NA | NA        |           | -1.767   | -1.717    | -1.672 NA |        |
| A019566_01 |    | -0.724    | -1.106    | -0.998    | -1.054    | -1.164   | -1.184    | -0.899    | -1.002 |
| A019568_01 |    | 0.981     | 0.543     | -0.115    | -0.117    | 0.125    | 0.259     | 0.099     | 0.19   |
| A019571_01 |    | 0.374     | 0.401     | -0.24     | -0.237    | 0.099    | 0.24      | 0.204     | 0.438  |
| A019572_01 |    | -0.168    | 0.172     | 0.179     | 0.233     | 0.807    | 0.626     | 0.306     | 0.334  |
| A019573_01 |    | 0.663     | 0.411     | 0.052 NA  |           | 0.316    | 0.276 NA  | NA        |        |
| A019575_01 |    | -0.316    | -0.023    | 0.028     | -0.081    | -0.435   | -0.269    | -0.342    | -0.575 |
| A019576_01 |    | -0.184 NA |           | 0.463     | 0.349     | 1.04 NA  |           | 0.64      | 0.758  |
| A019578_01 |    | 0.966     | 0.651     | -0.27     | -0.172    | 1.428    | 1.319     | 0.574     | 0.878  |
| A019579_01 | NA | NA        |           | -0.125    | -0.322 NA |          | -0.135    | 0.287     | 0.231  |
| A019580_01 |    | -0.747    | -0.925    | -0.247    | -0.298    | -0.834   | -0.796    | -0.368    | -0.488 |
| A019582_01 | NA |           | -0.022    | 0.204     | -0.135 NA | NA       |           | 0.047 NA  |        |
| A019583_01 |    | 0.473     | 0.511     | 0.108     | 0.07      | 0.796    | 0.536     | 0.431     | 0.287  |
| A019584_01 |    | 0.554     | 0.314     | -0.285    | -0.199    | 0.656    | 0.645     | 0.587     | 0.926  |
| A019585_01 |    | -0.007    | -0.274    | 0.451     | 0.231     | 0.585    | 0.181     | 0.428     | 0.209  |
| A019587_01 |    | -0.676    | -0.755    | -1.743    | -1.672    | -0.511   | -0.542    | -0.771 NA |        |
| A019589_01 |    | 0.349     | 0.314     | 0.213     | -0.026    | 0.479    | 0.078     | 0.246     | 0.154  |
| A019590_01 |    | 0.022     | -0.035    | 0.104     | 0.173     | 0.276    | 0.106     | 0.169     | 0.108  |
| A019591_01 |    | -0.73     | -1.055    | -1.641    | -1.321    | -1.8     | -1.752    | -1.468    | -1.801 |
| A019592_01 |    | 0.839     | 0.591     | -0.057    | 0.169     | 0.346    | 0.294     | 0.403     | 0.672  |
| A019597_01 |    | -0.042    | -0.143    | 0.019     | 0.12      | -0.113   | -0.133    | -0.263    | -0.201 |
| A019602_01 |    | 0.303     | 0.018     | -0.985 NA |           | -0.835   | -0.9 NA   | NA        |        |
| A019604_01 |    | -0.838    | -0.981    | 0.332     | 0.29      | -0.295   | -0.142    | -0.336    | -0.18  |
| A019606_01 |    | 0.858     | 0.476     | 0.124     | 0.044     | 0.631    | 0.623     | 0.365     | 0.511  |
| A019608_01 |    | -1.076    | -1.154    | -1.898    | -1.616    | -1.622   | -1.235    | -1.194    | -0.979 |
| A019609_01 | NA | NA        |           | 0.134     | -0.071 NA | NA       |           | 0.153     | 0.187  |
| A019611_01 |    | -2.056    | -1.06     | -0.779    | -0.537    | -0.446   | -0.241    | -0.106    | 0.072  |
| A019612_01 |    | 0.124     | 0.038     | 0.318     | 0.185     | 0.302    | 0.107     | 0.144     | 0.013  |
| A019614_01 |    | 0.416     | 0.171     | -0.126    | -0.087    | 0.027    | -0.124    | -0.049    | 0.035  |
| A019615_01 | NA | NA        |           | 0.303     | 0.236     | 0.076 NA |           | 0.027 NA  |        |
| A019617_01 |    | -0.369    | -0.208    | 0.361     | 0.101     | 0.117 NA |           | 0.237     | 0.045  |
| A019618_01 |    | 0.455 NA  |           | -0.112    | -0.188    | 0.355 NA |           | 0.079     | 0.106  |
| A019619_01 |    | -0.215    | -0.158    | -0.221    | -0.217    | -0.317   | -0.155    | 0.079     | 0.12   |
| A019621_01 | NA | NA        |           | 0.36      | 0.121 NA  | NA       |           | 0.22      | 0.021  |
| A019625_01 |    | -1.582    | -1.465    | -0.778    | -0.832    | -0.528   | -0.484    | 0.015     | 0.013  |
| A019626_01 |    | -0.86     | -0.741    | 0.089     | 0.088     | -0.688   | -0.625    | -0.472    | -0.383 |
| A019630_01 |    | -0.217 NA |           | -0.356 NA |           | -0.53    | -1.079    | -0.461 NA |        |
| A019632_01 |    | 0.284     | 0.28      | -0.031 NA |           | 0.029    | -0.089    | -0.19     | -0.147 |
| A019633_01 |    | 0.517     | 0.167 NA  | NA        |           | 0.628    | 0.218     | 0.534 NA  |        |
| A019635_01 |    | -0.354    | -0.27     | 0.001     | -0.007    | -0.441   | -0.3      | -0.076    | -0.181 |
| A019636_01 |    | 0.698     | 0.825     | -0.334    | -0.101    | 0.116    | 0.961     | 0.3       | 0.949  |
| A019638_01 |    | -0.187    | -0.075    | -0.593    | -0.41     | -0.492   | -0.307    | -0.373    | -0.309 |
| A019640_01 |    | 0.319     | -0.378    | -0.947 NA | NA        | NA       | NA        | NA        | NA     |
| A019641_01 |    | -1.282    | -1.691    | -0.78     | -0.687    | -1.209   | -1.365    | -0.825    | -1.028 |

|            |        |        |        |        |        |        |        |        |
|------------|--------|--------|--------|--------|--------|--------|--------|--------|
| A019642_01 | -0.148 | NA     | -0.63  | -0.597 | -0.531 | NA     | -0.057 | 0.063  |
| A019645_01 | 0.732  | 0.362  | -0.058 | -0.205 | 0.362  | 0.394  | 0.32   | 0.326  |
| A019649_01 | 0.42   | -0.105 | -0.289 | -0.178 | -0.205 | -0.432 | -0.366 | -0.127 |
| A019650_01 | -0.348 | -0.544 | 0.373  | 0.289  | -0.332 | -0.709 | -0.297 | -0.363 |
| A019654_01 | 0.808  | 0.689  | -0.405 | -0.415 | 0.311  | 0.268  | 0.135  | 0.155  |
| A019655_01 | NA     | NA     | 0.348  | 0.089  | NA     | NA     | -0.065 | 0.145  |
| A019659_01 | 0.03   | 0.156  | -0.034 | NA     | 0.568  | NA     | 0.418  | 0.341  |
| A019662_01 | -0.359 | -0.343 | 0.104  | 0.082  | -0.643 | -0.651 | -0.414 | -0.443 |
| A019663_01 | 1.089  | 0.706  | 0.151  | 0.101  | 1.277  | 0.761  | 0.28   | 0.198  |
| A019666_01 | 0.062  | 0.158  | -1.302 | -1.165 | -0.823 | -0.872 | -1.111 | -1.146 |
| A019668_01 | -0.243 | 0.058  | 0.042  | -0.01  | -0.416 | -0.326 | 0.355  | 0.281  |
| A019672_01 | 0.757  | 0.373  | 0.173  | 0.129  | 0.23   | 0.087  | 0.175  | 0.485  |
| A019674_01 | 0.041  | -0.036 | 0.418  | 0.353  | 0.407  | 0.181  | 0.162  | 0.362  |
| A019675_01 | -0.243 | 0.184  | 0.052  | 0.054  | 0.008  | -0.189 | 0.049  | -0.074 |
| A019677_01 | 0.549  | 0.177  | -0.142 | NA     | 0.05   | 0.024  | 0.239  | NA     |
| A019678_01 | -0.521 | -0.919 | -1.659 | -1.486 | -1.021 | -0.616 | -0.592 | 0.015  |
| A019679_01 | 0.201  | 0.087  | 0.608  | 0.35   | 0.589  | 0.292  | 0.283  | 0.145  |
| A019680_01 | -1.934 | -2.752 | -1.884 | -1.761 | -2.538 | -1.773 | -1.474 | -1.852 |
| A019681_01 | 0.156  | 0.162  | -0.14  | -0.002 | 0.112  | 0.201  | 0.248  | 0.157  |
| A019683_01 | 0.126  | -0.006 | 0.181  | 0.064  | -0.374 | -0.584 | -0.389 | -0.468 |
| A019684_01 | -0.12  | -0.253 | 0.135  | 0.047  | -0.925 | -0.769 | -0.345 | -0.369 |
| A019686_01 | 0.612  | 0.52   | -0.013 | -0.099 | 1.088  | 0.521  | 0.514  | 0.346  |
| A019691_01 | 0.232  | NA     | 0.04   | -0.027 | 0.074  | NA     | -0.121 | -0.051 |
| A019692_01 | 1.368  | 1.389  | 0.635  | 0.755  | 0.417  | 0.68   | 0.425  | 0.612  |
| A019695_01 | NA     | NA     | 0.369  | 0.318  | -0.046 | -0.166 | -0.107 | -0.051 |
| A019698_01 | 0.432  | 0.599  | 0.027  | 0.068  | 0.665  | 1.054  | 0.898  | 1.01   |
| A019699_01 | -0.04  | 0.247  | 0.151  | 0.193  | 0.402  | 0.2    | 0.508  | 0.382  |
| A019707_01 | NA     | NA     | 0.56   | 0.517  | NA     | NA     | 0.079  | -0.027 |
| A019710_01 | -1.642 | -1.768 | -0.452 | -0.368 | -1.265 | -1.169 | -0.926 | -0.928 |
| A019712_01 | 0.221  | 0.273  | 0.372  | 0.251  | 0.104  | 0.011  | 0.109  | -0.067 |
| A019713_01 | -1.33  | -0.708 | 0.213  | 0.223  | 0.247  | 0.307  | 0.285  | 0.255  |
| A019714_01 | 0.322  | 0.182  | 0.117  | 0.142  | -0.146 | 0.065  | -0.034 | 0.221  |
| A019718_01 | -0.985 | -1.233 | -2.23  | -1.869 | -1.338 | -1.332 | -1.212 | -1.461 |
| A019719_01 | -0.065 | -0.097 | 0.21   | 0.123  | -0.04  | 0.059  | 0      | -0.097 |
| A019724_01 | 0.337  | 0.537  | -0.213 | -0.127 | 0.212  | 0.25   | 0.322  | 0.208  |
| A019725_01 | -0.64  | NA     | -0.321 | -0.379 | -0.574 | NA     | -0.318 | -0.667 |
| A019726_01 | NA     | NA     | -0.186 | NA     | NA     | NA     | NA     | NA     |
| A019730_01 | 0.629  | 0.293  | -0.859 | NA     | -0.203 | -0.247 | 0.108  | NA     |
| A019732_01 | 0.247  | 0.152  | -0.247 | -0.153 | -0.19  | 0.013  | 0.07   | 0.353  |
| A019733_01 | 0.7    | 0.338  | -0.844 | -0.745 | -0.089 | -0.158 | -0.289 | 0.045  |
| A019734_01 | NA     | NA     | -0.237 | -0.291 | NA     | NA     | 0.108  | -0.155 |
| A019738_01 | NA     | NA     | -0.05  | -0.003 | -0.4   | NA     | -0.421 | -0.387 |
| A019741_01 | 0.091  | -0.024 | -0.742 | -0.537 | -0.807 | -0.673 | -0.701 | -0.45  |
| A019744_01 | 0.391  | 0.341  | -0.141 | -0.273 | -0.642 | -0.566 | -0.531 | -0.614 |
| A019745_01 | -0.797 | NA     | -0.957 | NA     | -0.992 | NA     | 0.521  | 0.404  |
| A019748_01 | NA     | NA     | -1.744 | -1.514 | NA     | NA     | -1.512 | -1.666 |
| A019749_01 | 0.349  | 0.362  | 0.201  | 0.12   | 0.171  | -0.013 | 0.098  | -0.193 |
| A019750_01 | NA     | NA     | -0.248 | NA     | NA     | NA     | -0.018 | NA     |
| A019751_01 | -0.03  | 0.124  | 0.506  | 0.346  | 0.17   | 0.198  | 0.215  | 0.248  |
| A019754_01 | -0.295 | -0.095 | 0.138  | -0.024 | 0.306  | 0.287  | 0.315  | 0.145  |
| A019755_01 | 1.425  | 0.929  | -0.316 | NA     | 0.607  | 0.386  | 0.551  | 0.54   |
| A019756_01 | 0.745  | 0.711  | 0.047  | 0.077  | 0.354  | 0.6    | 0.248  | 0.532  |
| A019758_01 | 0.397  | 1.043  | -0.209 | -0.312 | 0.669  | 1.016  | 1.306  | 1.212  |
| A019761_01 | -1.063 | -1.154 | -1.413 | -1.192 | -1.158 | -0.96  | -0.941 | -1.307 |
| A019763_01 | NA     | -0.549 | 0.116  | 0.067  | NA     | -0.071 | -0.37  | -0.372 |
| A019766_01 | 0.261  | -0.045 | -0.209 | -0.057 | -0.88  | -0.584 | -0.456 | -0.297 |
| A019768_01 | -1.76  | -1.029 | -0.46  | -0.296 | -0.213 | 0.021  | 0.438  | 0.724  |
| A019771_01 | -0.734 | -0.622 | -0.449 | -0.341 | -0.592 | -0.634 | -0.607 | -0.546 |
| A019774_01 | 0.213  | 0.398  | 0.345  | 0.4    | 0.365  | 0.309  | 0.003  | 0.069  |
| A019779_01 | NA     | NA     | NA     | NA     | NA     | NA     | 0.191  | NA     |
| A019781_01 | -0.336 | 0.255  | 0.129  | -0.105 | 1.218  | 0.715  | 0.955  | 0.719  |
| A019783_01 | 0.416  | 0.149  | -0.303 | -0.329 | 0.137  | 0.058  | 0.226  | 0.076  |
| A019785_01 | 0.578  | 0.538  | 0.385  | 0.216  | 0.674  | 0.565  | 0.384  | 0.176  |
| A019791_01 | -0.617 | -0.208 | 0.48   | 0.356  | 0.324  | 0.113  | 0.165  | -0.1   |
| A019793_01 | 0.078  | 0.015  | -0.406 | -0.192 | -0.49  | -0.394 | -0.309 | -0.327 |
| A019794_01 | NA     | NA     | 0.178  | -0.002 | 0.221  | NA     | 0.27   | 0.311  |
| A019796_01 | -0.835 | -0.497 | -0.14  | -0.077 | 0.062  | -0.032 | -0.201 | -0.151 |
| A019797_01 | NA     | NA     | -0.734 | -0.647 | NA     | NA     | 0.16   | 0.25   |

|            |    |        |        |        |        |        |        |        |        |
|------------|----|--------|--------|--------|--------|--------|--------|--------|--------|
| A019799_01 | NA | NA     |        | 0.059  | 0.132  | 0.838  | 0.649  | 0.006  | 0.119  |
| A019801_01 |    | -0.275 | -0.207 | 0.249  | 0.304  | -0.086 | -0.059 | -0.232 | 0.022  |
| A019805_01 |    | 0.053  | 0.116  | 0.399  | 0.337  | 0.041  | 0.035  | 0.237  | 0.148  |
| A019806_01 |    | 0.42   | 0.384  | 0.004  | 0.156  | 0.146  | 0.128  | 0.016  | 0.185  |
| A019810_01 |    | -0.151 | 0.137  | 0.421  | 0.274  | 0.631  | 0.364  | 0.303  | 0.136  |
| A019812_01 |    | -0.791 | -0.378 | 0.542  | 0.573  | 0.686  | 0.89   | 0.368  | 0.467  |
| A019813_01 |    | 0.121  | -0.163 | -0.603 | -0.37  | -0.3   | -0.819 | NA     | -0.434 |
| A019815_01 |    | -0.103 | 0.006  | 0.144  | 0.161  | 0.57   | 0.423  | 0.598  | 0.464  |
| A019818_01 |    | 0.209  | 0.022  | -0.659 | -0.476 | -0.702 | NA     | NA     | NA     |
| A019820_01 |    | -0.024 | -0.466 | 0.205  | 0.026  | -0.278 | -0.513 | -0.238 | -0.505 |
| A019822_01 |    | -0.396 | -0.352 | 0.285  | 0.069  | 0.336  | 0.22   | 0.17   | 0.156  |
| A019823_01 |    | 0.062  | 0.125  | 0.03   | -0.077 | 0.081  | 0.182  | 0.04   | -0.134 |
| A019826_01 |    | -0.391 | -0.227 | -0.36  | -0.317 | -0.247 | -0.104 | 0.031  | -0.053 |
| A019828_01 |    | 0.408  | 0.015  | -0.767 | -0.593 | -0.314 | -0.499 | -0.362 | -0.655 |
| A019829_01 |    | 0.03   | 0.26   | 0.158  | 0.266  | -0.368 | 0.183  | -0.019 | 0.192  |
| A019830_01 |    | 0.585  | 0.172  | 0.237  | 0.154  | -0.074 | -0.082 | 0.112  | -0.107 |
| A019831_01 |    | 0.641  | 0.472  | 0.593  | 0.271  | 0.496  | 0.425  | 0.549  | 0.274  |
| A019834_01 |    | -0.185 | -0.148 | -0.684 | -0.677 | -0.546 | -0.691 | -0.604 | -0.809 |
| A019840_01 |    | 0.333  | -0.08  | 0.143  | 0.116  | -0.292 | -0.244 | -0.389 | -0.342 |
| A019842_01 | NA | NA     |        | 0.236  | 0.146  | NA     | NA     | NA     | -0.234 |
| A019843_01 |    | 0.328  | 0.061  | -0.203 | -0.1   | -0.407 | -0.424 | -0.169 | 0.055  |
| A019846_01 |    | 0.198  | 0.136  | -0.859 | -0.633 | -0.357 | -0.21  | -0.046 | 0.105  |
| A019848_01 |    | 0.433  | 0.632  | 0.073  | 0.063  | 0.438  | 0.171  | 0.277  | 0.297  |
| A019851_01 |    | 0.76   | 0.606  | -0.442 | -0.66  | 0.039  | 0.012  | 0.271  | 0.041  |
| A019854_01 |    | 0.148  | 0.049  | -1.332 | -1.042 | -1.144 | -0.846 | -0.672 | -0.285 |
| A019855_01 |    | -1.466 | -1.422 | -0.365 | -0.341 | -1.276 | -0.803 | -0.733 | -0.983 |
| A019857_01 |    | -0.509 | -0.552 | -0.475 | -0.345 | -0.359 | -0.408 | -0.567 | -0.513 |
| A019858_01 |    | -0.439 | -0.768 | -0.874 | -0.622 | -1.172 | -0.982 | -0.962 | -0.978 |
| A019861_01 |    | 0.554  | 0.388  | -0.129 | 0.051  | -0.003 | 0.116  | 0.009  | 0.359  |
| A019865_01 | NA | NA     |        | 0.379  | 0.256  | NA     | NA     | 0.102  | -0.09  |
| A019866_01 |    | 0.603  | 0.164  | -0.874 | -0.741 | -0.498 | -0.503 | -0.434 | -0.207 |
| A019870_01 |    | -0.406 | -0.174 | 0.171  | 0.088  | 0.023  | 0.09   | 0.134  | 0.022  |
| A019872_01 |    | -0.717 | -0.675 | -0.508 | NA     | -0.348 | NA     | 0.034  | -0.016 |
| A019874_01 |    | 0.424  | 0.374  | 0.393  | 0.445  | 0.207  | 0.549  | 0.208  | 0.437  |
| A019876_01 |    | -0.688 | NA     | 0.432  | 0.192  | -0.09  | 0.02   | 0.093  | -0.131 |
| A019877_01 | NA |        | -0.291 | 0.063  | -0.05  | -0.165 | -0.346 | -0.382 | -0.533 |
| A019880_01 |    | 0.068  | 0.436  | 0.014  | -0.005 | -0.013 | 0.279  | 0.571  | 0.544  |
| A019882_01 |    | -0.608 | -0.808 | -0.779 | -0.544 | -0.995 | -1.029 | -0.714 | -0.528 |
| A019885_01 |    | -0.617 | -0.724 | -0.656 | -0.46  | -0.808 | -0.595 | -0.535 | -0.392 |
| A019886_01 |    | 0.254  | -0.029 | 0.159  | 0.202  | 0.314  | 0.309  | -0.017 | -0.053 |
| A019887_01 |    | -0.903 | -0.958 | -0.788 | -0.663 | -1.132 | -0.917 | -0.798 | -0.681 |
| A019891_01 |    | -0.884 | NA     | 0.158  | -0.029 | -0.54  | NA     | 0.004  | -0.161 |
| A019892_01 |    | 0.138  | 0.326  | 0.345  | 0.358  | 0.545  | 0.564  | 0.319  | 0.389  |
| A019893_01 |    | 0.479  | 1.05   | 0.05   | 0.066  | 0.363  | 0.298  | 0.824  | 0.943  |
| A019894_01 |    | -0.959 | -0.025 | -0.259 | 0.034  | -0.003 | 0.396  | -0.014 | 0.553  |
| A019895_01 |    | -0.172 | -0.451 | -0.509 | -0.217 | -0.08  | -0.223 | 0.135  | 0.312  |
| A019897_01 |    | 0.179  | NA     | -0.345 | -0.392 | 0.292  | NA     | 0.22   | 0.165  |
| A019898_01 |    | 0.088  | 0.309  | 0.295  | 0.277  | 0.047  | 0.181  | 0.087  | 0.124  |
| A019899_01 |    | -0.641 | -0.39  | 0.178  | 0.088  | -0.292 | -0.265 | -0.2   | -0.196 |
| A019900_01 |    | -0.145 | -0.073 | -0.339 | -0.291 | 0.055  | 0.09   | 0.558  | 0.537  |
| A019901_01 |    | -1.231 | -0.561 | 0.327  | 0.408  | -0.094 | 0.094  | -0.04  | 0.033  |
| A019904_01 |    | -0.251 | -0.305 | 0.358  | 0.281  | -0.252 | -0.401 | -0.183 | -0.38  |
| A019905_01 |    | -0.444 | -0.2   | -0.055 | -0.101 | -0.227 | -0.131 | 0.297  | 0.147  |
| A019916_01 |    | -0.369 | -0.245 | -0.589 | -0.524 | -0.395 | -0.201 | -0.143 | -0.063 |
| A019918_01 | NA | NA     |        | -0.115 | NA     | NA     | NA     | NA     | NA     |
| A019919_01 |    | -0.648 | NA     | NA     | NA     | NA     | NA     | NA     | NA     |
| A019923_01 |    | 0.371  | 0.254  | 0.564  | 0.264  | 0.34   | 0.165  | 0.162  | -0.031 |
| A019926_01 |    | -0.379 | -0.164 | 0.407  | 0.258  | 0.784  | 0.757  | 0.594  | 0.528  |
| A019927_01 | NA | NA     |        | 0.207  | NA     | NA     | NA     | NA     | NA     |
| A019929_01 |    | 0.41   | 0.361  | -0.047 | -0.098 | -0.027 | -0.029 | 0.097  | 0.233  |
| A019934_01 |    | -0.666 | -0.753 | -0.699 | -0.639 | -0.98  | -0.611 | -0.458 | -0.648 |
| A019935_01 |    | 0.09   | 0.174  | -0.051 | 0.019  | 0.195  | 0.097  | 0.043  | 0.099  |
| A019936_01 |    | -0.254 | -0.615 | -0.244 | -0.303 | -0.676 | -0.574 | -0.414 | -0.6   |
| A019940_01 |    | 0.35   | 0.558  | 0.246  | 0.252  | 0.036  | 0.321  | 0.137  | 0.226  |
| A019941_01 |    | -0.308 | -0.061 | -0.403 | -0.296 | -0.603 | -0.458 | -0.555 | -0.594 |
| A019942_01 |    | 0.949  | 1.059  | -0.238 | -0.279 | -0.015 | 0.136  | -0.133 | -0.129 |
| A019943_01 | NA | NA     |        | 0.252  | -0.087 | NA     | NA     | 0.06   | -0.514 |
| A019944_01 | NA | NA     |        | -0.25  | NA     | NA     | NA     | -0.477 | NA     |

|            |    |        |        |        |        |        |        |        |        |
|------------|----|--------|--------|--------|--------|--------|--------|--------|--------|
| A019946_01 |    | -1.624 | -1.613 | 0.071  | -0.041 | -0.761 | -0.714 | -0.464 | -0.509 |
| A019947_01 |    | 0.186  | 0.057  | -0.143 | -0.229 | -0.281 | -0.249 | -0.122 | -0.308 |
| A019949_01 |    | 0.464  | 0.454  | -0.557 | -0.288 | -0.178 | 0.215  | 0.236  | 0.614  |
| A019952_01 |    | -0.556 | -0.19  | -0.764 | -0.733 | -0.459 | -0.438 | -0.13  | -0.308 |
| A019953_01 |    | 0.305  | 0.682  | -0.576 | -0.186 | -0.093 | 0.556  | -0.117 | 0.682  |
| A019954_01 |    | 0.019  | 0.094  | 0.389  | 0.228  | 0.378  | 0.318  | 0.403  | 0.248  |
| A019957_01 |    | 0.005  | -0.143 | -0.048 | -0.085 | 0.157  | 0.227  | 0.137  | 0.183  |
| A019958_01 |    | 0.386  | 0.362  | 0.448  | 0.076  | 0.382  | 0.17   | 0.355  | 0.036  |
| A019964_01 |    | 1.119  | 1.121  | -0.148 | -0.189 | 0.265  | 0.413  | -0.202 | -0.109 |
| A019965_01 |    | -0.592 | -0.569 | -0.162 | 0.072  | -0.618 | -0.551 | -0.64  | -0.316 |
| A019968_01 |    | 0.428  | 0.01   | 0.126  | NA     | -0.156 | -0.242 | -0.049 | 0.037  |
| A019969_01 |    | 0.498  | 0.294  | 0.128  | 0.093  | -0.037 | -0.098 | 0.008  | -0.093 |
| A019970_01 |    | 0.437  | 0.417  | -0.511 | -0.456 | 0.047  | 0.126  | 0.234  | 0.496  |
| A019971_01 |    | 0.483  | 0.636  | -0.191 | 0.129  | 0.74   | 1.356  | 0.797  | 1.606  |
| A019972_01 | NA | NA     |        | 0.494  | 0.152  | NA     | NA     | -0.157 | -0.307 |
| A019973_01 |    | 0.035  | -0.195 | -0.249 | -0.317 | -0.164 | -0.323 | -0.105 | -0.381 |
| A019975_01 |    | 0.765  | 0.668  | 0.357  | 0.3    | 0.334  | 0.423  | 0.496  | 0.384  |
| A019976_01 |    | 0.801  | 0.899  | -0.7   | -0.572 | -0.447 | -0.165 | -0.216 | 0.139  |
| A019977_01 |    | 0.633  | 0.401  | -0.207 | -0.031 | 0.425  | 0.378  | 0.219  | 0.337  |
| A019978_01 | NA | NA     |        | 0.26   | 0.269  | NA     | NA     | 0.058  | 0.138  |
| A019982_01 |    | -0.826 | -0.718 | -0.005 | -0.08  | -0.621 | -0.377 | -0.202 | -0.223 |
| A019983_01 |    | 0.407  | 0.173  | -0.041 | -0.05  | -0.03  | -0.063 | 0.003  | -0.055 |
| A019985_01 |    | 0.19   | 0.392  | 0.371  | 0.35   | 0.363  | 0.392  | 0.216  | 0.2    |
| A019987_01 |    | 0.599  | NA     | 0.331  | 0.106  | -0.624 | NA     | 0.217  | 0.156  |
| A019991_01 |    | -0.002 | -0.738 | -0.65  | -0.546 | -0.423 | -1.1   | -0.493 | -0.608 |
| A019995_01 | NA |        | 0.482  | 0.393  | 0.442  | 0.407  | 0.794  | 0.776  | 0.844  |
| A019997_01 |    | 0.25   | -0.26  | -0.448 | -0.43  | 0.03   | -0.314 | -0.204 | -0.384 |
| A020001_01 |    | -0.86  | -0.803 | -0.487 | -0.042 | -1.622 | -1.176 | -0.996 | -0.574 |
| A020005_01 |    | -1.08  | -0.697 | 0.144  | -0.018 | 0.003  | -0.106 | -0.114 | -0.144 |
| A020008_01 |    | 0.642  | 0.615  | -0.051 | 0.108  | 0.965  | 1.168  | 0.762  | 1.116  |
| A020009_01 |    | 0.315  | 0.559  | -0.275 | -0.332 | 0.521  | 0.631  | 0.366  | 0.343  |
| A020012_01 |    | -0.789 | -0.804 | NA     | NA     | -0.992 | -0.924 | NA     | NA     |
| A020014_01 |    | -1.369 | NA     | -1.455 | -1.28  | -1.306 | -1.072 | -0.789 | NA     |
| A020016_01 |    | -0.821 | -0.507 | -1.236 | -1.191 | -1.311 | -0.946 | -0.92  | -0.812 |
| A020017_01 |    | -1.15  | -0.306 | 0.147  | 0.033  | 0.223  | -0.115 | 0.288  | 0.144  |
| A020022_01 |    | 0.698  | NA     | 0.464  | 0.244  | 1.247  | NA     | 0.915  | 0.655  |
| A020023_01 | NA | NA     |        | 0.506  | 0.316  | 0.205  | 0.183  | 0.017  | -0.056 |
| A020025_01 |    | 0.21   | -0.084 | -0.209 | -0.154 | -0.322 | -0.342 | -0.116 | -0.162 |
| A020031_01 |    | -0.963 | -0.548 | 0.231  | 0.11   | -0.068 | -0.052 | 0.15   | -0.071 |
| A020033_01 |    | 0.263  | 0.572  | 0.205  | 0.212  | 0.682  | 1.212  | 0.806  | 0.952  |
| A020035_01 |    | 0.51   | 0.219  | -1.158 | -0.891 | -0.367 | -0.74  | -1.372 | -1.185 |
| A020036_01 | NA | NA     |        | 0.309  | 0.234  | NA     | NA     | 0.368  | 0.046  |
| A020037_01 |    | -0.451 | -0.358 | -0.095 | -0.076 | -0.605 | -0.6   | -0.454 | -0.429 |
| A020039_01 |    | -0.035 | -0.664 | -0.929 | -0.891 | -0.427 | NA     | -0.681 | -0.644 |
| A020041_01 |    | 0.233  | NA     | -0.042 | NA     | NA     | NA     | 0.162  | NA     |
| A020042_01 |    | 0.64   | 0.569  | 0.379  | 0.308  | 0.902  | 0.655  | 0.657  | 0.674  |
| A020043_01 | NA | NA     |        | 0.379  | 0.177  | 0.535  | NA     | 0.266  | 0.168  |
| A020045_01 |    | 0.25   | 0.559  | 0.628  | 0.807  | 0.086  | 0.695  | 0.166  | 0.418  |
| A020046_01 |    | 0.245  | 0.212  | 0.367  | 0.222  | 0.487  | 0.52   | 0.315  | 0.365  |
| A020047_01 |    | 0.071  | 0.141  | 0.156  | -0.016 | -0.061 | -0.145 | 0.247  | 0.006  |
| A020048_01 |    | 0.022  | -0.264 | -0.23  | -0.161 | -0.124 | -0.448 | -0.068 | -0.036 |
| A020050_01 | NA |        | -1.305 | -0.596 | -0.613 | NA     | NA     | NA     | NA     |
| A020053_01 |    | 0.402  | 0.71   | -0.182 | -0.129 | 0.429  | 0.678  | 0.664  | 0.818  |
| A020054_01 |    | -0.325 | -0.155 | -0.337 | -0.381 | -0.332 | -0.405 | -0.488 | -0.63  |
| A020055_01 |    | 0.919  | 0.577  | 0.136  | 0.18   | 0.304  | 0.291  | 0.291  | 0.356  |
| A020056_01 |    | 0.677  | 0.699  | 0.105  | 0.049  | 0.552  | 0.61   | 0.437  | 0.43   |
| A020060_01 | NA | NA     |        | 0.397  | 0.411  | 0.11   | NA     | 0.145  | 0.108  |
| A020061_01 |    | 0.079  | 0.054  | 0.075  | 0.167  | -0.207 | -0.011 | 0.113  | 0.24   |
| A020062_01 |    | 0.792  | 0.863  | 0.037  | 0.27   | 0.447  | 0.947  | 0.392  | 0.977  |
| A020064_01 | NA | NA     |        | -0.403 | -0.122 | NA     | NA     | -0.019 | -0.037 |
| A020065_01 |    | -0.86  | -0.469 | 0.316  | 0.279  | 0.64   | 0.574  | 0.729  | 0.677  |
| A020068_01 |    | 0.73   | 0.515  | -0.489 | -0.602 | -0.024 | 0.254  | 0.323  | 0.672  |
| A020070_01 |    | 0.057  | -0.198 | -1.061 | -0.774 | -0.438 | -0.456 | -0.633 | -0.486 |
| A020071_01 |    | -0.157 | -0.18  | -1.122 | -0.738 | -1.527 | -1.143 | -1.241 | -0.718 |
| A020072_01 |    | -0.673 | -0.45  | -0.482 | -0.34  | -0.586 | -0.527 | -0.139 | -0.189 |
| A020073_01 |    | 0.319  | 0.264  | 0.371  | 0.176  | 0.244  | 0.028  | 0.373  | 0.056  |
| A020074_01 |    | -0.106 | -0.101 | 0.072  | 0.132  | 0.032  | 0.102  | 0.003  | -0.019 |
| A020075_01 | NA | NA     |        | 0.142  | 0.192  | NA     | NA     | -0.258 | -0.298 |

|            |           |        |           |          |           |          |           |        |
|------------|-----------|--------|-----------|----------|-----------|----------|-----------|--------|
| A020076_01 | -1.034    | -0.695 | -0.127    | -0.006   | -0.707    | -0.293   | -0.176    | -0.14  |
| A020077_01 | 0.481     | 0.285  | -0.321    | -0.147   | 0.138     | 0.204    | -0.067    | 0.368  |
| A020078_01 | 0.419     | 0.221  | -0.161    | 0.095 NA |           | 0.12 NA  | NA        |        |
| A020082_01 | -0.216    | -0.012 | 0.213     | 0.056    | 0.137     | 0.221    | 0.161     | 0.136  |
| A020083_01 | 1.079     | 0.811  | 0.241     | 0.317    | 0.277     | 0.109    | 0.055     | 0.274  |
| A020086_01 | -0.958    | -1.075 | -0.64     | -0.582   | -0.912    | -0.668   | -0.607    | -0.718 |
| A020089_01 | 0.274     | 0.286  | 0.225     | 0.214    | 0.545     | 0.223    | 0.275     | 0.301  |
| A020090_01 | NA        | NA     | -0.043    | 0.06 NA  | NA        |          | 0.429     | 0.47   |
| A020091_01 | 0.192     | 0.318  | 0.035     | -0.02    | 0.353     | 0.346    | 0.27      | 0.172  |
| A020092_01 | 0.313     | 0.229  | -0.6      | -0.201   | -0.153    | -0.046   | -0.163    | 0.202  |
| A020098_01 | 0.043     | 0.148  | 0.53      | 0.522    | 0.11      | 0.055    | 0.197     | 0.237  |
| A020099_01 | -0.727    | -0.32  | 0.079     | 0.164    | -0.508    | -0.234   | -0.176    | -0.157 |
| A020100_01 | 0.342     | 0.231  | -0.105    | -0.23    | 0.226     | 0.122    | 0.245     | 0.119  |
| A020101_01 | -0.658    | -0.281 | -0.087    | -0.114   | -0.649    | -0.432   | -0.265    | -0.484 |
| A020102_01 | 0.352     | 0.346  | 0.103     | 0.18     | 0.045     | 0.197    | 0.264     | 0.552  |
| A020103_01 | 0.776     | 0.599  | -0.182    | -0.116   | 0.836     | 0.721    | 0.654     | 0.599  |
| A020104_01 | 0.248     | -0.092 | -0.586    | -0.437   | -0.158    | -0.206   | -0.038    | -0.049 |
| A020105_01 | 0.197     | 0.598  | 0.359     | 0.388    | 0.803     | 0.98     | 0.482     | 0.759  |
| A020107_01 | -0.058    | -0.033 | -0.064    | 0.052    | -0.347    | -0.115   | -0.263    | -0.304 |
| A020109_01 | -0.106    | 0.123  | -0.19     | -0.105   | -0.6      | -0.037   | -0.058    | 0.043  |
| A020116_01 | 0.608     | 0.641  | 0.12      | 0.123    | 0.415     | 0.329    | 0.212     | 0.113  |
| A020119_01 | 0.39      | 0.25   | -0.462    | -0.547   | 0.803     | 0.852    | 1.06      | 0.999  |
| A020120_01 | -0.526    | -0.315 | -0.187    | -0.151   | -0.559    | -0.44    | -0.086    | 0.04   |
| A020121_01 | 0.887     | 0.581  | 0.3       | 0.216    | 0.564     | 0.453    | 0.601     | 0.459  |
| A020122_01 | -0.674    | -0.164 | 0.089     | 0.168    | -0.533    | -0.17    | 0.003     | 0.038  |
| A020123_01 | 0.462 NA  |        | 0.36      | 0.285    | 0.103     | 0.136    | 0.093     | -0.119 |
| A020125_01 | 0.951     | 0.506  | 0.005     | -0.025   | 0.314     | 0.204    | 0.167     | 0.246  |
| A020126_01 | 0.268     | 0.384  | 0.164     | 0.2      | 0.484     | 0.521    | 0.265     | 0.317  |
| A020128_01 | 0.364     | 0.121  | -0.073    | 0.023    | 0.175     | 0.15     | 0.223     | 0.203  |
| A020130_01 | NA        | NA     | -0.026 NA |          | 0.186 NA  |          | -0.043 NA |        |
| A020132_01 | 0.332     | 0.316  | 0.445     | 0.343    | 0.182     | 0.124    | 0.2       | 0.275  |
| A020134_01 | -0.801 NA |        | 0.071     | -0.064   | -0.304 NA |          | -0.097    | -0.31  |
| A020135_01 | 0.808     | 0.344  | 0.316     | 0.069    | 0.137     | -0.208   | -0.115    | -0.009 |
| A020140_01 | 0.438     | 0.303  | 0.153     | 0.234    | 0.027 NA  |          | -0.086    | -0.15  |
| A020141_01 | 0.499     | 0.221  | -0.41     | -0.409   | 0.133     | 0.096    | 0.243     | 0.413  |
| A020144_01 | -0.136    | -0.087 | -0.631    | -0.464   | -0.208    | 0.132    | 0.401     | 0.458  |
| A020145_01 | 0.265     | 0.189  | -0.552    | -0.369   | 0.303     | 0.407    | 0.487     | 0.498  |
| A020155_01 | -0.522    | -0.254 | -0.235    | -0.165   | -0.617    | -0.241   | -0.182    | 0.076  |
| A020157_01 | 0.473     | 0.366  | -0.197 NA |          | 0.782     | 0.878 NA |           | 0.81   |
| A020160_01 | -0.652    | -0.208 | 0.83      | 0.641    | 0.795     | 0.78     | 0.173     | 0.245  |
| A020162_01 | 0.087     | 0.335  | -0.133    | -0.064   | 0.167     | 0.425    | 0.442     | 0.462  |
| A020164_01 | 0.749 NA  |        | 0.212 NA  | NA       | NA        | NA       | NA        |        |
| A020166_01 | -0.054 NA |        | 0.271 NA  |          | 0.078     | 0.082 NA | NA        |        |
| A020167_01 | 0.127     | 0.379  | 0.098     | 0.151    | 0.013     | 0.271    | 0.324     | 0.267  |
| A020169_01 | 0.453     | 0.512  | -0.075    | -0.047   | -0.003    | -0.057   | 0.017     | 0.119  |
| A020170_01 | 0.277 NA  |        | -0.566    | -0.669   | 0.332     | 0.17     | 0.334     | 0.432  |
| A020171_01 | 1.103     | 0.881  | 0.119     | 0.204    | -0.385    | -0.151   | -0.067    | 0.213  |
| A020172_01 | 0.304     | 0.295  | 0.369     | 0.289    | 0.324     | 0.558    | 0.284     | 0.397  |
| A020173_01 | 0.27      | 0.419  | 0.138     | 0.06     | 0.178     | 0.179    | 0.208     | 0.254  |
| A020178_01 | 0.282     | -0.148 | 0.427     | -0.006   | -0.027    | -0.189   | 0.392     | 0.191  |
| A020179_01 | -0.018    | 0.128  | -0.552    | -0.445   | 0.062     | -0.022   | 0.864     | 0.776  |
| A020183_01 | 0.664     | 0.186  | -0.104    | -0.24    | 0.127 NA  | NA       | NA        |        |
| A020186_01 | 0.863     | 1.078  | 0.297     | 0.203    | 0.739     | 0.817    | 0.52      | 0.611  |
| A020187_01 | 1.428     | 1.498  | -0.313    | -0.107   | -0.434    | -0.101   | -0.41     | -0.122 |
| A020188_01 | NA        | NA     | 0.335     | 0.04 NA  | NA        |          | -0.273    | -0.578 |
| A020189_01 | -0.028    | 0.275  | 0.307     | 0.058    | 0.449     | 0.288    | 0.41      | 0.399  |
| A020190_01 | 0.171     | 0.043  | -0.155    | -0.245   | 0.192     | 0.044    | 0.186     | 0.181  |
| A020192_01 | 0.654     | 0.565  | -0.004    | -0.003   | 0.781     | 0.594    | 0.868     | 0.834  |
| A020195_01 | 0.378     | 0.177  | 0.335     | 0.22     | 0.044     | 0.057    | 0.112     | 0.121  |
| A020196_01 | 0.121     | 0.151  | -0.058    | -0.078   | 0.475     | 0.458    | 0.503     | 0.42   |
| A020197_01 | -0.481    | -0.641 | 0.124     | 0.152    | -0.968    | -0.97    | -0.718    | -0.795 |
| A020198_01 | NA        | NA     | -0.021    | 0.024 NA | NA        | NA       |           | -0.373 |
| A020199_01 | 0.238     | 0.164  | -0.196    | -0.013   | -0.069    | 0.236    | -0.205    | 0.222  |
| A020200_01 | 0.297     | 0.35   | 0.605     | 0.511    | 0.307     | 0.248    | 0.159     | 0.12   |
| A020203_01 | -1.528    | -0.85  | -0.336    | -0.22    | -0.901    | -0.493   | -0.37     | -0.276 |
| A020205_01 | -0.227    | 0.123  | 0.288     | 0.271    | -0.219    | 0.076    | -0.067    | -0.072 |
| A020208_01 | -0.301    | -0.401 | 0.489     | 0.345    | -0.423    | -0.638   | -0.312    | -0.306 |
| A020210_01 | -0.621    | -0.245 | -0.008    | 0.003    | -0.317    | -0.038   | -0.064    | -0.036 |

|            |    |        |        |        |        |        |        |        |        |
|------------|----|--------|--------|--------|--------|--------|--------|--------|--------|
| A020211_01 |    | -0.835 | -0.036 | 0.381  | 0.314  | -0.053 | 0.008  | 0.006  | 0.09   |
| A020213_01 | NA |        |        | -0.279 | -0.505 | NA     | -0.9   | -0.431 | -0.603 |
| A020214_01 |    | -1.105 | -0.419 | -0.495 | -0.394 | -0.397 | 0      | 0.162  | 0.217  |
| A020215_01 |    | -0.639 | -0.391 | -0.019 | -0.017 | -0.591 | -0.417 | -0.355 | -0.389 |
| A020216_01 |    | 0.456  | 0.058  | -0.673 | NA     | NA     | NA     | NA     |        |
| A020217_01 |    | -1.517 | -2.279 | -1.962 | -1.771 | -1.375 | -1.326 | -1.173 | -1.476 |
| A020219_01 | NA |        |        | 0.069  | NA     | NA     | NA     | NA     |        |
| A020221_01 |    | -0.617 | -0.118 | 0.38   | 0.503  | -0.137 | 0.285  | -0.024 | 0.231  |
| A020222_01 |    | -0.207 | -0.121 | -0.323 | -0.24  | -1.092 | -0.766 | -0.551 | -0.335 |
| A020225_01 |    | 0.299  | 0.633  | 0.955  | 0.67   | -0.1   | 0.391  | 0.131  | 0.028  |
| A020226_01 |    | 0.601  | 0.499  | 0.165  | 0.036  | 0.394  | 0.404  | 0.487  | 0.334  |
| A020228_01 |    | -1.37  | -0.408 | -0.564 | -0.493 | 0.111  | 0.262  | 0.302  | 0.307  |
| A020229_01 |    | 0.473  | 0.142  | 0.1    | -0.041 | 0.488  | 0.341  | 0.516  | 0.585  |
| A020233_01 |    | 0.099  | 0.413  | -0.027 | -0.039 | -0.044 | 0.024  | 0.007  | -0.069 |
| A020236_01 | NA |        |        | 0.63   | 0.324  | 0.841  | 0.663  | 0.433  | 0.517  |
| A020241_01 |    | 0.446  | 0.489  | 0.418  | 0.182  | 0.57   | 0.434  | 0.317  | 0.415  |
| A020242_01 |    | -2.96  | -3.305 | 0.259  | 0.253  | -2.976 | -2.54  | -1.883 | -2     |
| A020243_01 |    | 0.293  | 0.296  | 0.497  | 0.342  | 0.347  | 0.36   | 0.289  | 0.297  |
| A020245_01 | NA |        |        | 0.07   | 0.178  | NA     | NA     | NA     | -0.358 |
| A020249_01 |    | -0.155 | -0.059 | -0.159 | -0.181 | 0.204  | 0.074  | -0.084 | -0.051 |
| A020250_01 |    | 0.101  | 0.062  | 0.077  | 0.114  | 0.088  | -0.24  | -0.331 | -0.22  |
| A020251_01 |    | 0.163  | NA     | -0.253 | -0.286 | 0.496  | 0.319  | -0.169 | -0.058 |
| A020254_01 |    | -1.494 | -0.877 | -0.003 | 0.304  | -0.738 | -0.351 | -0.171 | -0.08  |
| A020256_01 |    | -0.289 | -0.222 | 0.241  | 0.202  | 0.21   | 0.164  | -0.043 | 0.082  |
| A020257_01 |    | 0.12   | 0.236  | -0.28  | -0.223 | 0.387  | 0.476  | 0.044  | 0.207  |
| A020258_01 |    | 1.101  | 1.15   | 0.489  | 0.588  | -0.085 | 0.001  | 0.065  | 0.194  |
| A020260_01 |    | 0.461  | 0.448  | 0.369  | 0.201  | 0.441  | 0.375  | 0.628  | 0.595  |
| A020264_01 |    | 0.554  | 0.137  | -0.019 | 0.079  | -0.149 | -0.28  | -0.039 | 0.086  |
| A020265_01 |    | 0.512  | 0.151  | -0.667 | NA     | -0.551 | -0.587 | -0.75  | NA     |
| A020267_01 |    | -0.372 | -0.398 | -0.089 | 0.002  | -0.554 | -0.345 | -0.266 | -0.122 |
| A020268_01 |    | 0.91   | 0.54   | -0.048 | -0.096 | 0.012  | 0.033  | 0.201  | 0.324  |
| A020272_01 |    | -0.214 | -0.27  | -0.239 | -0.221 | -0.233 | -0.374 | -0.296 | -0.356 |
| A020273_01 |    | -1.857 | -1.439 | 0.511  | 0.339  | -0.93  | -0.394 | -0.241 | -0.341 |
| A020274_01 |    | -0.392 | -0.278 | -0.258 | -0.082 | -0.43  | -0.353 | -0.509 | -0.241 |
| A020281_01 |    | 0.1    | 0.045  | -0.034 | 0.004  | 0.383  | 0.244  | 0.139  | 0.253  |
| A020283_01 | NA |        |        | 0.225  | 0.011  | NA     | NA     | -0.064 | 0.112  |
| A020286_01 |    | -0.162 | -0.638 | -1.022 | -1.036 | -0.043 | -0.241 | 0.2    | 0.43   |
| A020289_01 | NA |        | 0.548  | 0.838  | 0.641  | NA     | -0.052 | -0.11  | -0.014 |
| A020290_01 | NA |        | -0.333 | 0.684  | 0.475  | 0.615  | 0.289  | 0.024  | 0.047  |
| A020291_01 |    | 0.311  | 0.452  | -0.144 | 0.035  | -0.446 | 0.026  | 0.011  | 0.278  |
| A020293_01 | NA |        |        | -0.209 | -0.12  | -0.197 | NA     | NA     | -0.239 |
| A020294_01 |    | -0.245 | 0.032  | 0      | -0.003 | -0.078 | 0.013  | -0.1   | -0.199 |
| A020295_01 |    | 0.408  | 0.197  | -0.149 | -0.216 | -0.293 | -0.331 | 0      | 0.028  |
| A020296_01 |    | 0.341  | 0.161  | -0.147 | -0.018 | -0.22  | -0.227 | -0.343 | -0.199 |
| A020297_01 |    | 0.028  | 0.231  | 0.06   | 0.076  | 0.56   | 0.372  | 0.027  | 0.149  |
| A020298_01 |    | -0.173 | -0.063 | 0.163  | 0.206  | 0.332  | 0.139  | 0.1    | 0.202  |
| A020299_01 |    | -0.922 | -0.596 | 0.288  | 0.135  | -0.184 | 0.102  | -0.099 | -0.114 |
| A020300_01 |    | -1.413 | -1.452 | -0.689 | -0.632 | -1.344 | -1.42  | -0.853 | -0.931 |
| A020301_01 |    | 0.371  | 0.195  | 0.213  | 0.167  | 0.096  | 0.16   | 0.063  | 0.017  |
| A020303_01 |    | -1.702 | -1.455 | -0.242 | -0.168 | -1.311 | -0.908 | -0.687 | -0.662 |
| A020305_01 |    | 0.241  | 0.41   | 0.105  | 0.134  | -0.134 | -0.003 | -0.064 | -0.078 |
| A020306_01 |    | 0.989  | 0.827  | 0.154  | 0.123  | 0.607  | 0.566  | 0.44   | 0.579  |
| A020308_01 |    | 0.354  | 0.347  | -0.362 | -0.287 | 0.185  | 0.192  | 0.167  | 0.379  |
| A020309_01 |    | 0.868  | 0.762  | -0.158 | NA     | 0.984  | 0.772  | 0.681  | 0.668  |
| A020311_01 |    | -0.792 | -0.35  | 0.479  | 0.521  | -0.047 | -0.074 | -0.096 | -0.059 |
| A020312_01 |    | 0.885  | 0.507  | 0.504  | 0.475  | 0.633  | 0.424  | 0.084  | 0.144  |
| A020314_01 |    | -2.043 | -2.499 | NA     | NA     | -2.256 | -2.126 | NA     | NA     |
| A020317_01 |    | 0.746  | 0.646  | -0.232 | -0.019 | 1.013  | 1.334  | 0.906  | 1.219  |
| A020318_01 | NA |        |        | -0.093 | -0.277 | NA     | NA     | -0.073 | -0.316 |
| A020319_01 |    | 0.221  | 0.257  | 0.202  | 0.286  | 0.496  | 0.5    | -0.03  | 0.13   |
| A020320_01 |    | -0.605 | -0.207 | 0.044  | 0.031  | -0.27  | 0.102  | 0.011  | -0.009 |
| A020321_01 |    | 0.428  | 0.22   | -0.125 | -0.127 | -0.106 | 0.005  | 0.242  | 0.364  |
| A020322_01 |    | -0.404 | -0.186 | 0.42   | 0.265  | -0.26  | -0.166 | -0.251 | -0.301 |
| A020323_01 |    | 0.313  | 0.187  | -0.075 | -0.117 | -0.018 | 0.061  | 0.006  | 0.109  |
| A020324_01 |    | -0.126 | NA     | 0.313  | 0.233  | -0.371 | NA     | -0.415 | -0.318 |
| A020325_01 |    | 0.69   | NA     | 0.761  | 0.368  | 0.367  | 0.109  | 0.349  | NA     |
| A020326_01 |    | 0.724  | 0.681  | 0.089  | 0.188  | 0.251  | 0.415  | 0.387  | 0.422  |
| A020327_01 |    | -0.453 | -0.527 | -0.175 | -0.15  | -0.379 | -0.15  | -0.175 | -0.03  |



|            |    |        |    |        |        |    |        |        |       |        |        |        |
|------------|----|--------|----|--------|--------|----|--------|--------|-------|--------|--------|--------|
| A020330_01 |    | 0.701  | NA |        | -0.291 | NA |        | NA     |       | 0.04   |        | 0.752  |
| A020331_01 | NA |        |    | 0.09   | 0.016  |    | 0.068  | 0.333  | 0.562 | 0.123  |        | 0.317  |
| A020332_01 | NA |        | NA |        | -0.493 | NA |        | NA     |       | NA     |        | NA     |
| A020333_01 |    | 0.384  |    | 0.031  | -0.242 |    | -0.27  | 0.142  | 0.037 |        | -0.1   | 0.009  |
| A020336_01 |    | 0.08   | NA |        | 0.381  |    | 0.158  | 0.256  | NA    |        | -0.106 | -0.179 |
| A020337_01 |    | -0.144 |    | -0.245 | 0.066  |    | 0.004  | 0.289  |       | -0.01  | -0.193 | -0.3   |
| A020338_01 |    | 0.027  |    | 0.18   | 0.224  |    | 0.253  | 0.462  |       | 0.402  | 0.254  | 0.308  |
| A020340_01 |    | -0.899 |    | -0.713 | -0.76  |    | -0.524 | -0.826 |       | -0.641 | -0.771 | -0.553 |
| A020341_01 |    | 0.198  |    | 0.301  | 0.093  |    | 0.1    | -0.089 |       | 0.208  | 0.313  | 0.358  |
| A020342_01 |    | 0.414  |    | 0.193  | 0.289  |    | 0.088  | 0.404  |       | 0.382  | 0.336  | 0.282  |
| A020343_01 | NA |        | NA |        | -0.263 |    | -0.313 | NA     |       | NA     | -0.425 | -0.44  |
| A020344_01 |    | -0.626 |    | -0.305 | -0.053 |    | -0.001 | 0.513  |       | 0.396  | 0.366  | 0.53   |
| A020345_01 |    | 0.866  |    | 0.776  | 0.28   |    | 0.277  | 0.098  |       | 0.28   | 0.423  | 0.529  |
| A020346_01 |    | 0.054  |    | 0.102  | -0.183 |    | -0.082 | -0.32  |       | -0.223 | -0.287 | -0.037 |
| A020347_01 |    | -0.179 |    | 0.207  | 0.434  |    | 0.056  | 0.468  |       | 0.2    | 0.53   | 0.451  |
| A020348_01 |    | 0.08   |    | 0.27   | 0.242  |    | 0.098  | -0.081 | NA    |        | 0.06   | -0.051 |
| A020349_01 | NA |        | NA |        | -0.424 |    | -0.313 | NA     |       | -1.466 | -1.146 | -1.201 |
| A020350_01 |    | -0.845 |    | -0.684 | -0.269 |    | -0.104 | 1.075  |       | 1.254  | 1.092  | 1.217  |
| A020352_01 |    | 0.266  |    | 0.571  | 0.627  |    | 0.285  | 0.097  |       | 0.614  | 0.656  | 0.51   |
| A020353_01 |    | 0.087  |    | 0.418  | -0.224 |    | -0.038 | 0.204  |       | 0.429  | 0.36   | 0.467  |
| A020356_01 |    | -0.704 |    | -0.162 | 0.437  |    | 0.069  | -0.567 |       | -0.154 | 0.004  | -0.273 |
| A020360_01 |    | 0.769  |    | 0.718  | -1.145 |    | -0.93  | 0.713  |       | 0.68   | 0.128  | 0.27   |
| A020362_01 |    | -0.197 |    | 0.011  | 0.071  |    | 0.062  | 0.482  |       | 0.354  | 0.314  | 0.424  |
| A020363_01 |    | -1.42  |    | -1.645 | -0.141 |    | -0.03  | -1.345 |       | -1.051 | -0.174 | -0.117 |
| A020364_01 |    | -0.426 |    | -0.282 | -0.088 |    | -0.145 | -0.224 |       | -0.307 | -0.285 | -0.409 |
| A020367_01 |    | -0.264 |    | -0.07  | 0.047  |    | -0.067 | -0.351 |       | -0.07  | -0.136 | -0.111 |
| A020368_01 |    | 0.566  |    | 0.635  | -0.09  |    | -0.059 | 0.602  |       | 0.421  | 0.52   | 0.47   |
| A020369_01 |    | 0.549  |    | 0.394  | 0.031  |    | 0.178  | 0.508  |       | 0.532  | 0.442  | 0.612  |
| A020370_01 |    | -1.388 |    | -1.053 | -0.321 |    | -0.303 | -0.524 |       | -0.393 | -0.303 | -0.309 |
| A020371_01 |    | 0.92   |    | 1.108  | -0.27  |    | -0.05  | 0.337  |       | 0.584  | 0.326  | 0.599  |
| A020372_01 | NA |        | NA |        | 0.308  |    | 0.145  | NA     |       | NA     | -0.208 | -0.075 |
| A020373_01 |    | 0.179  |    | -0.122 | -0.417 |    | -0.237 | -0.13  |       | -0.148 | -0.142 | 0.183  |
| A020375_01 |    | -0.067 |    | -0.011 | -0.226 |    | -0.29  | 0.44   |       | 0.259  | 0.208  | 0.079  |
| A020376_01 |    | -0.644 |    | -0.317 | 0.049  |    | -0.01  | -0.009 |       | 0.005  | 0.079  | -0.017 |
| A020378_01 |    | 0.4    |    | 0.112  | 0.184  |    | 0.243  | 0.147  |       | 0.135  | -0.017 | 0.017  |
| A020379_01 | NA |        | NA |        | 0.603  |    | 0.158  | NA     |       | NA     | -0.035 | -0.362 |
| A020380_01 |    | -0.258 |    | 0.007  | 0      |    | -0.059 | 0.166  |       | 0.317  | 0.28   | 0.123  |
| A020381_01 |    | -1.52  |    | -1.543 | -0.639 |    | -0.404 | -1.257 |       | -1.055 | -1.085 | -1.056 |
| A020382_01 |    | 0.264  |    | -0.032 | -0.447 | NA |        | -0.056 |       | -0.156 | NA     | NA     |
| A020383_01 |    | 0.539  |    | 0.355  | -0.376 |    | -0.291 | -0.089 |       | -0.118 | NA     | 0.015  |
| A020384_01 | NA |        | NA |        | -0.759 |    | -0.756 | -0.332 |       | 0.029  | -0.34  | -0.183 |
| A020385_01 |    | -0.843 |    | -0.505 | -0.154 |    | -0.139 | -0.85  |       | -0.519 | -0.314 | -0.442 |
| A020386_01 |    | -0.818 |    | -0.573 | 0.32   |    | 0.302  | 0.077  |       | 0.2    | -0.184 | -0.177 |
| A020390_01 | NA |        | NA |        | -1.015 |    | -1.13  | NA     |       | NA     | -0.141 | -0.389 |
| A020392_01 |    | -0.62  |    | -0.193 | -0.266 |    | -0.253 | -0.57  |       | -0.372 | -0.297 | -0.442 |
| A020393_01 |    | 0.086  |    | 0.044  | 0.191  |    | 0.263  | -0.083 |       | 0.016  | -0.521 | -0.354 |
| A020394_01 |    | -1.358 |    | -0.991 | 0.268  |    | 0.258  | -0.559 |       | -0.301 | 0.034  | 0.022  |
| A020395_01 |    | 0.463  |    | -0.019 | -0.074 | NA |        | -0.147 | NA    |        | -0.154 | NA     |
| A020396_01 |    | -0.016 |    | -0.025 | -0.159 |    | -0.173 | 0.182  |       | 0.332  | 0.303  | 0.414  |
| A020399_01 |    | -1.349 |    | -0.823 | 0.01   |    | -0.045 | -0.756 |       | -0.678 | -0.393 | -0.582 |
| A020400_01 |    | -1.321 |    | -0.919 | -0.113 |    | -0.059 | -1.088 |       | -0.673 | -0.321 | -0.541 |
| A020401_01 |    | 0.124  |    | 0.013  | -0.257 |    | -0.289 | 0.026  |       | -0.011 | 0.034  | 0.031  |
| A020403_01 |    | 0.679  |    | 0.66   | -0.584 |    | -0.65  | 0.474  |       | 0.459  | 0.348  | 0.413  |
| A020404_01 |    | 1.357  |    | 1.43   | -2.289 |    | -1.816 | 0.671  |       | 0.704  | 1.966  | 2.144  |
| A020406_01 |    | -0.59  |    | -0.601 | -0.964 |    | -0.677 | -0.843 |       | -0.783 | -0.597 | -0.334 |
| A020410_01 |    | -1.388 |    | -1.153 | -1.338 |    | -1.034 | -1.307 |       | -1.037 | -0.836 | -0.863 |
| A020412_01 |    | 0.042  |    | 0.265  | 0.077  |    | 0.125  | 0.052  |       | 0.184  | 0.077  | 0.225  |
| A020413_01 |    | -1.017 |    | -0.662 | 0.255  |    | 0.068  | -0.507 |       | -0.191 | 0.058  | -0.127 |
| A020418_01 |    | -0.833 |    | 0.053  | -0.311 |    | -0.148 | 0.075  |       | 0.121  | -0.013 | 0.05   |
| A020419_01 |    | 0.286  |    | 0.264  | 0.041  |    | 0.133  | 0.948  |       | 0.599  | 0.593  | 0.738  |
| A020420_01 |    | 1.151  |    | 0.869  | 0.512  |    | 0.35   | 0.755  |       | 0.594  | 0.105  | 0.188  |
| A020421_01 |    | 0.05   |    | 0.347  | -0.552 |    | -0.311 | -0.211 |       | 0.014  | -0.217 | 0.117  |
| A020422_01 |    | 0.378  |    | 0.264  | 0.385  |    | 0.162  | 0.007  |       | 0.02   | 0.085  | -0.034 |
| A020423_01 | NA |        | NA |        | 0.01   |    | -0.063 | NA     |       | NA     | -0.656 | NA     |
| A020424_01 |    | 0.33   |    | 0.197  | -0.416 |    | -0.45  | -0.111 |       | 0.162  | 0.143  | 0.361  |
| A020425_01 | NA |        | NA |        | 0.397  |    | 0.226  | NA     |       | NA     | 0.06   | 0.041  |
| A020427_01 |    | 1.165  |    | 0.863  | 0.237  |    | 0.106  | 0.39   |       | 0.58   | 0.48   | 0.665  |
| A020428_01 |    | -1.39  |    | -1.248 | -0.234 |    | -0.369 | -0.898 |       | -0.561 | -0.311 | -0.436 |

|            |    |        |        |        |        |        |        |        |        |
|------------|----|--------|--------|--------|--------|--------|--------|--------|--------|
| A020435_01 |    | 0.108  | 0.207  | -0.07  | -0.013 | 0.805  | 0.684  | 0.395  | 0.36   |
| A020436_01 |    | -1.767 | -1.168 | -0.388 | -0.248 | -1.086 | -0.702 | -0.494 | -0.439 |
| A020437_01 |    | -0.139 | 0.038  | 0.06   | 0.053  | -0.015 | -0.042 | 0.084  | -0.105 |
| A020438_01 |    | 0.562  | 0.256  | 0.434  | 0.253  | 0.816  | 0.266  | 0.103  | 0.043  |
| A020440_01 |    | -1.119 | -1.053 | -0.747 | -0.503 | -0.708 | -0.723 | -0.455 | -0.304 |
| A020441_01 |    | 0.411  | 0.416  | -0.008 | 0.003  | 0.394  | 0.628  | 0.308  | 0.66   |
| A020442_01 | NA |        | -0.646 | 0.106  | -0.018 | 0.146  | -0.126 | -0.07  | -0.066 |
| A020443_01 |    | -0.517 | -0.2   | 0.251  | 0.08   | -0.039 | -0.128 | 0.006  | -0.166 |
| A020444_01 |    | 0.366  | 0.149  | 0.04   | -0.093 | 0.409  | 0.29   | 0.312  | 0.141  |
| A020445_01 |    | -0.978 | -0.924 | 0.268  | 0.263  | -0.119 | -0.126 | -0.165 | -0.126 |
| A020446_01 |    | -0.513 | -0.16  | -0.117 | -0.104 | 0.134  | 0.179  | 0.334  | 0.445  |
| A020452_01 |    | -1.06  | -1.14  | -1.78  | -1.434 | -1.323 | -1.099 | -1.276 | -1.343 |
| A020455_01 |    | 0.046  | 0.015  | 0.002  | NA     | -0.172 | -0.149 | 0.082  | NA     |
| A020460_01 |    | 0.301  | 0.056  | NA     | NA     | -0.084 | 0.009  | NA     | -0.186 |
| A020461_01 |    | 0.347  | 0.317  | -0.053 | -0.109 | 0.557  | 0.459  | -0.103 | -0.24  |
| A020464_01 |    | 0.456  | 0.288  | -0.399 | -0.228 | 0.139  | 0.09   | -0.143 | 0.035  |
| A020467_01 |    | -0.15  | -0.132 | -0.342 | -0.381 | -0.323 | -0.238 | -0.294 | -0.09  |
| A020470_01 |    | 0.09   | -0.055 | -0.036 | -0.118 | -0.275 | -0.414 | -0.357 | -0.338 |
| A020471_01 | NA | NA     |        | 0.088  | 0.113  | NA     | NA     | -0.213 | -0.231 |
| A020472_01 |    | -1.434 | -1.073 | -0.227 | -0.02  | -0.363 | -0.549 | -0.271 | -0.24  |
| A020474_01 |    | 0.052  | 0.024  | 0.277  | 0.192  | -0.22  | -0.185 | -0.095 | -0.062 |
| A020477_01 | NA | NA     |        | 0.246  | -0.006 | NA     | NA     | -0.107 | -0.366 |
| A020478_01 | NA | NA     |        | 0.124  | 0.192  | NA     | NA     | NA     | NA     |
| A020480_01 | NA | NA     |        | 0.062  | -0.018 | NA     | 0.202  | -0.145 | -0.127 |
| A020481_01 | NA |        | -0.342 | 0.019  | -0.109 | NA     | -0.453 | -0.295 | -0.249 |
| A020482_01 |    | -0.337 | -0.032 | -0.349 | -0.031 | 0.296  | 0.187  | -0.157 | -0.086 |
| A020484_01 | NA | NA     |        | 0.231  | 0.243  | NA     | NA     | NA     | -0.427 |
| A020486_01 |    | 0.535  | 0.225  | -0.152 | -0.221 | 0.48   | 0.387  | 0.332  | 0.312  |
| A020488_01 | NA | NA     |        | 0.207  | 0.174  | NA     | NA     | 0.155  | 0.096  |
| A020489_01 |    | 0.442  | 0.471  | -0.113 | -0.131 | 0.08   | 0.062  | 0.254  | 0.265  |
| A020490_01 | NA | NA     |        | -0.063 | -0.171 | NA     | NA     | -0.346 | -0.585 |
| A020491_01 | NA | NA     |        | 0.44   | 0.298  | NA     | NA     | -0.096 | -0.244 |
| A020493_01 |    | 0.128  | -0.003 | 0.339  | 0.237  | 0.269  | 0.063  | 0.018  | 0.049  |
| A020497_01 |    | 0.256  | 0.406  | 0.497  | 0.388  | 0.164  | 0.335  | 0.341  | 0.371  |
| A020498_01 |    | 0.663  | 0.374  | -0.148 | -0.029 | 0.099  | 0.283  | 0.157  | 0.416  |
| A020500_01 |    | 0.892  | 0.698  | 0.061  | 0.143  | 0.368  | 0.44   | 0.194  | 0.315  |
| A020501_01 |    | -2.275 | -2.481 | -2.313 | -1.719 | -2.068 | -1.822 | -1.192 | -1.463 |
| A020502_01 |    | 0.398  | 0.14   | -0.161 | NA     | 0.179  | 0.005  | NA     | NA     |
| A020504_01 |    | -0.388 | NA     | 0.147  | 0.103  | 0.342  | 0.386  | 0.376  | 0.504  |
| A020505_01 | NA | NA     |        | 0.062  | -0.212 | NA     | NA     | -0.026 | -0.383 |
| A020506_01 |    | 0.242  | 0.385  | 0.18   | 0.107  | 0.358  | 0.321  | 0.238  | 0.257  |
| A020507_01 |    | 0.078  | -0.091 | 0.046  | 0.153  | 0.194  | 0.009  | 0.108  | 0.096  |
| A020509_01 |    | 0.541  | 0.392  | -0.073 | -0.005 | 0.801  | 0.903  | 0.517  | 0.693  |
| A020510_01 |    | 0.306  | 0.156  | 0.391  | 0.153  | 0.522  | 0.219  | 0.408  | 0.194  |
| A020511_01 |    | 0.203  | -0.075 | 0.221  | 0.181  | 0.24   | -0.19  | 0.007  | 0.171  |
| A020512_01 |    | 0.58   | 0.175  | -0.84  | -1.014 | -0.243 | -0.188 | -0.444 | -0.469 |
| A020514_01 |    | 0.324  | 0.317  | -0.195 | -0.231 | 0.189  | 0.337  | 0.213  | 0.231  |
| A020515_01 |    | 0.191  | 0.093  | 0.189  | 0.077  | 0.568  | 0.652  | 0.599  | 0.443  |
| A020516_01 |    | -0.829 | -0.943 | -0.187 | -0.059 | -1.526 | -1.271 | -0.677 | -0.609 |
| A020520_01 |    | -0.62  | -0.294 | 0.585  | 0.42   | -0.019 | -0.128 | -0.028 | -0.192 |
| A020521_01 |    | -0.143 | 0.148  | -0.067 | -0.054 | 0.197  | 0.393  | 0.199  | 0.131  |
| A020522_01 |    | 0.509  | 0.414  | -0.067 | -0.159 | NA     | 0.077  | 0.099  | 0.18   |
| A020523_01 | NA | NA     |        | 0.294  | 0.083  | NA     | 0.067  | 0.027  | -0.159 |
| A020524_01 |    | -0.49  | -0.685 | -0.207 | NA     | 0.35   | 0.059  | NA     | NA     |
| A020529_01 |    | -0.198 | 0.524  | 0.162  | 0.189  | 0.381  | 0.895  | 0.499  | 0.643  |
| A020530_01 |    | -0.75  | -0.142 | 0.422  | 0.335  | 0.357  | 0.419  | 0.225  | 0.264  |
| A020533_01 |    | -0.652 | NA     | 0.082  | 0.072  | 0.199  | -0.024 | 0.093  | -0.196 |
| A020534_01 |    | -0.11  | 0.112  | 0.143  | 0.254  | -0.554 | -0.376 | -0.2   | -0.236 |
| A020535_01 |    | -0.326 | -0.175 | 0.099  | -0.015 | -0.366 | -0.251 | 0.106  | -0.068 |
| A020537_01 | NA | NA     |        | 0.052  | 0.044  | NA     | NA     | -0.524 | -0.861 |
| A020541_01 |    | -0.834 | -0.386 | -0.075 | -0.066 | 0.507  | 0.467  | 0.584  | 0.707  |
| A020542_01 | NA | NA     |        | 0.261  | 0.132  | NA     | NA     | -0.243 | -0.346 |
| A020543_01 |    | 0.458  | 0.831  | -0.228 | NA     | 0.789  | 0.841  | 0.752  | 0.792  |
| A020544_01 | NA | NA     |        | 0.233  | -0.214 | NA     | NA     | -0.192 | NA     |
| A020546_01 |    | 0.199  | 0.181  | -0.019 | -0.321 | 0.61   | 0.232  | 0.489  | 0.235  |
| A020547_01 |    | -0.333 | -0.302 | 0.021  | -0.043 | 0.337  | -0.025 | -0.008 | -0.183 |
| A020549_01 |    | 0.697  | 0.576  | 0.097  | -0.176 | 0.442  | 0.233  | 0.394  | 0.294  |
| A020550_01 |    | -1.373 | -1.267 | -0.67  | -0.526 | -1.346 | -1.093 | -0.998 | -0.981 |

|            |    |        |        |        |        |        |        |        |        |
|------------|----|--------|--------|--------|--------|--------|--------|--------|--------|
| A020551_01 |    | 0.229  | 0.255  | 0.131  | 0.117  | 0.497  | 0.379  | 0.747  | 0.63   |
| A020553_01 |    | 0.3    | 0.055  | -0.579 | -0.398 | -0.254 | -0.369 | -0.372 | -0.209 |
| A020554_01 |    | 0.311  | 0.412  | -0.179 | -0.19  | 0.339  | 0.354  | 0.057  | -0.017 |
| A020556_01 |    | -0.345 | -0.65  | -1.634 | -1.571 | -0.271 | -0.511 | -0.234 | -0.466 |
| A020557_01 | NA |        |        | -0.418 | -0.575 | -0.503 | NA     | -0.711 | -0.865 |
| A020559_01 |    | -1.083 | -1.234 | -1.801 | -1.513 | NA     | NA     | -1.401 | NA     |
| A020560_01 |    | -3.012 | -4.178 | -1.198 | -0.836 | -2.735 | -2.39  | -1.933 | -2.085 |
| A020562_01 |    | 0.493  | 0.205  | 0.001  | -0.085 | -0.084 | -0.29  | -0.257 | -0.015 |
| A020563_01 |    | -0.051 | 0.091  | 0.093  | 0.176  | 0.133  | 0.301  | -0.09  | 0.084  |
| A020564_01 |    | -0.513 | -0.284 | 0.309  | 0.034  | 0.09   | -0.016 | 0.203  | -0.081 |
| A020565_01 |    | -1.315 | -0.591 | -0.359 | -0.143 | -0.182 | 0.068  | -0.262 | -0.24  |
| A020570_01 |    | -0.742 | NA     | 0.684  | 0.428  | -0.012 | 0.194  | 0.317  | 0.071  |
| A020571_01 |    | 0.285  | 0.292  | -0.068 | 0.006  | 0.177  | 0.128  | -0.007 | 0.003  |
| A020572_01 | NA |        | NA     | -0.852 | -0.98  | NA     | NA     | NA     | NA     |
| A020573_01 |    | 0.839  | 0.634  | 0.009  | 0.059  | 0.521  | 0.711  | 0.579  | 0.769  |
| A020575_01 |    | 0.54   | 0.202  | 0.071  | -0.035 | 0.176  | 0.165  | -0.051 | -0.033 |
| A020576_01 |    | -0.07  | 0.006  | -0.107 | -0.038 | -0.007 | -0.011 | -0.219 | -0.115 |
| A020577_01 |    | -1.242 | -0.696 | 0.118  | 0.066  | 0.021  | 0.115  | -0.015 | -0.013 |
| A020578_01 | NA |        | -0.241 | 0.246  | 0.154  | NA     | -0.637 | 0.163  | 0.195  |
| A020579_01 | NA |        | NA     | 0.203  | NA     | NA     | NA     |        | 0.179  |
| A020580_01 |    | -0.954 | -0.192 | 0.156  | 0.234  | -0.152 | -0.074 | 0.073  | 0.157  |
| A020581_01 | NA |        | NA     | -0.166 | NA     | NA     | NA     | 0.182  | NA     |
| A020584_01 |    | 0.637  | 0.671  | 0.039  | 0.073  | -0.108 | 0.025  | -0.035 | 0.044  |
| A020585_01 |    | 0.192  | 0.077  | 0.481  | 0.242  | 0.169  | 0.102  | 0.223  | -0.11  |
| A020586_01 |    | 0.221  | 0.189  | 0.007  | -0.037 | 0.11   | 0.065  | 0.514  | 0.452  |
| A020587_01 |    | -0.118 | NA     | 0.168  | 0.107  | 0.132  | NA     | 0.206  | 0.225  |
| A020588_01 |    | 0.632  | 0.716  | 0.191  | 0.228  | 0.432  | 0.789  | 0.421  | 0.724  |
| A020589_01 |    | 0.327  | 0.339  | 0.411  | 0.322  | 0.898  | 0.854  | 0.763  | 0.982  |
| A020590_01 |    | -1.025 | -0.586 | 0.175  | 0.188  | -0.099 | 0.229  | -0.139 | -0.177 |
| A020592_01 |    | -1.049 | -1.035 | -0.317 | -0.239 | -1.011 | -0.672 | -0.233 | -0.221 |
| A020593_01 |    | -0.175 | -0.316 | -0.172 | -0.077 | 0.11   | -0.066 | -0.037 | -0.019 |
| A020594_01 |    | -0.702 | -0.045 | -1.997 | -1.678 | -1.625 | -1.452 | -1.427 | -1.705 |
| A020595_01 |    | -0.134 | NA     | -0.074 | NA     | 0.15   | NA     | NA     | 0.383  |
| A020599_01 |    | -0.246 | -0.586 | -0.697 | -0.654 | -1.153 | -1.288 | -0.957 | -1.25  |
| A020600_01 |    | 0.508  | 0.071  | -0.427 | -0.469 | -0.608 | -0.563 | -0.507 | -0.47  |
| A020601_01 |    | 0.164  | 0.219  | -0.713 | -0.689 | -0.448 | -0.431 | -0.206 | -0.364 |
| A020602_01 |    | -0.224 | 0.04   | 0.239  | 0.252  | 0.446  | 0.351  | 0.271  | 0.251  |
| A020603_01 |    | 0.352  | 0.674  | -0.028 | 0.033  | 0.13   | 0.753  | 0.96   | 1.021  |
| A020604_01 | NA |        | NA     | 0.067  | 0.083  | -0.105 | -0.377 | -0.16  | -0.254 |
| A020605_01 |    | 0.129  | 0.422  | 0.274  | 0.233  | 0.754  | 0.981  | 0.688  | 0.762  |
| A020606_01 |    | -1.52  | -1.17  | -0.279 | -0.351 | -1.125 | -0.8   | -0.606 | -0.773 |
| A020608_01 |    | -0.071 | 0.044  | -0.071 | -0.113 | 0.093  | 0.082  | 0.084  | 0.072  |
| A020610_01 |    | 0.145  | 0.122  | 0.029  | 0.057  | 0.048  | 0.142  | -0.12  | 0.028  |
| A020611_01 |    | 0.043  | 0.178  | 0.226  | 0.134  | 0.685  | 0.299  | 0.463  | 0.21   |
| A020612_01 |    | -0.825 | -0.208 | 0.235  | 0.046  | 0.053  | -0.008 | 0.038  | -0.121 |
| A020613_01 |    | 0.706  | 0.551  | 0.494  | 0.346  | 0.726  | 0.629  | 0.668  | 0.578  |
| A020615_01 | NA |        | NA     | 0.802  | 0.873  | NA     | NA     | -1.1   | -1.041 |
| A020616_01 |    | 0.038  | -0.127 | -0.25  | -0.214 | -0.169 | -0.112 | -0.077 | 0.1    |
| A020617_01 |    | -0.122 | 0.189  | 0.347  | 0.413  | 0.153  | 0.58   | 0.13   | 0.341  |
| A020619_01 |    | -0.755 | -0.111 | -0.032 | -0.007 | 0.413  | 0.354  | 0.324  | 0.15   |
| A020620_01 |    | -1.21  | -0.697 | 0.408  | 0.302  | -0.141 | NA     | -0.263 | -0.223 |
| A020621_01 |    | -1.569 | -0.637 | 0.01   | 0.098  | -1.091 | -0.744 | -0.515 | -0.561 |
| A020622_01 |    | -0.175 | -0.51  | 0.368  | 0.108  | 0.018  | -0.076 | -0.06  | -0.245 |
| A020623_01 |    | -0.408 | -0.129 | -0.32  | -0.184 | -0.226 | -0.053 | -0.122 | 0.188  |
| A020625_01 |    | 0.002  | 0.018  | -0.386 | -0.388 | -0.122 | -0.153 | NA     | -0.213 |
| A020627_01 | NA |        | NA     | 0.126  | -0.022 | -0.414 | -0.569 | -0.211 | -0.37  |
| A020629_01 |    | -0.645 | -0.412 | -0.01  | -0.001 | 0.152  | 0.267  | 0.13   | 0.092  |
| A020630_01 | NA |        | NA     | 0.038  | 0.066  | NA     | NA     | -1.064 | -1.466 |
| A020633_01 |    | -0.289 | 0.295  | -0.185 | -0.039 | 0.683  | 1.116  | 0.505  | 1.131  |
| A020638_01 | NA |        | NA     | 0.053  | 0.045  | NA     | NA     | -0.326 | -0.318 |
| A020639_01 | NA |        | NA     | -0.044 | -0.191 | NA     | NA     | -0.09  | NA     |
| A020640_01 |    | -0.2   | 0.012  | -0.287 | -0.315 | -0.031 | 0.041  | 0.059  | -0.103 |
| A020641_01 |    | -0.116 | 0.066  | -0.334 | -0.362 | 0.055  | 0.07   | 0.419  | 0.269  |
| A020643_01 | NA |        | NA     | -0.766 | -0.784 | NA     | NA     | NA     | -0.983 |
| A020645_01 |    | -0.39  | -0.229 | 0.254  | 0.173  | -0.027 | 0.263  | 0.036  | 0.062  |
| A020646_01 |    | 0.236  | 0.237  | -0.107 | -0.181 | 0.007  | 0.132  | 0.266  | 0.198  |
| A020647_01 | NA |        | NA     | 0.235  | 0.042  | NA     | NA     | 0.214  | 0.141  |
| A020649_01 |    | 0.228  | 0.14   | -0.263 | -0.158 | -0.256 | -0.137 | -0.163 | -0.115 |

|            |    |        |        |        |        |        |        |      |        |        |
|------------|----|--------|--------|--------|--------|--------|--------|------|--------|--------|
| A020650_01 | NA | NA     |        | 0.44   | 0.306  | -0.323 | NA     |      | -0.067 | -0.137 |
| A020652_01 |    | -0.257 | 0.027  | 0.112  | 0.053  | -0.139 |        | -0.2 | -0.193 | -0.447 |
| A020653_01 | NA | NA     |        | -0.252 | -0.192 | NA     | NA     |      | 0.176  | 0.071  |
| A020654_01 |    | 0.342  | 0.131  | 0.345  | 0.406  | 0.681  | 0.565  |      | -0.091 | -0.04  |
| A020656_01 |    | -1.008 | -0.867 | -0.321 | -0.372 | -0.324 | -0.364 |      | -0.008 | -0.032 |
| A020658_01 |    | -0.296 | -0.276 | NA     | -0.174 | -0.082 | -0.21  | NA   |        | -0.235 |
| A020659_01 | NA | NA     |        | -0.463 | -0.413 | NA     | NA     |      | -0.91  | -1.069 |
| A020660_01 |    | 0.475  | 0.357  | -0.093 | -0.032 | 0.166  | 0.379  |      | 0.187  | 0.23   |
| A020661_01 |    | -0.921 | -0.793 | -0.068 | -0.115 | -0.273 | -0.385 |      | -0.221 | -0.459 |
| A020663_01 |    | 0.671  | NA     | 0.173  | -0.003 | NA     | 0.389  |      | 0.027  | -0.061 |
| A020664_01 |    | 0.181  | 0.01   | -0.53  | -0.417 | -0.463 | -0.314 |      | -0.398 | -0.353 |
| A020665_01 | NA | NA     |        | 0.218  | 0.075  | -0.599 | NA     |      | -0.432 | -0.693 |
| A020668_01 |    | -0.402 | -0.261 | 0.078  | 0.078  | -0.155 | -0.162 |      | -0.142 | -0.165 |
| A020670_01 |    | -0.321 | -0.481 | 0.078  | 0.018  | -0.153 | -0.415 |      | -0.107 | -0.146 |
| A020671_01 |    | 0.42   | 0.364  | 0.163  | 0.126  | 0.722  | 0.5    |      | 0.722  | 0.757  |
| A020673_01 |    | -0.688 | -0.833 | 0.609  | 0.288  | -0.254 | -0.316 |      | -0.382 | -0.562 |
| A020678_01 |    | -0.213 | -0.056 | -0.285 | -0.289 | -0.098 | -0.197 |      | -0.024 | -0.139 |
| A020683_01 |    | -0.234 | -0.042 | -0.03  | -0.227 | 0.141  | 0.062  |      | 0.346  | 0.055  |
| A020684_01 |    | 0.706  | 0.555  | -0.403 | -0.232 | 0.047  | 0.244  |      | -0.033 | 0.452  |
| A020686_01 | NA | NA     |        | -0.169 | -0.284 | -0.063 | NA     |      | -0.143 | -0.121 |
| A020689_01 |    | -1.066 | -1.464 | -1.789 | -1.474 | -1.573 | -1.444 |      | -1.382 | -1.702 |
| A020690_01 |    | 0.441  | 0.301  | 0.635  | 0.552  | 0.227  | 0.199  |      | 0.143  | -0.024 |
| A020691_01 | NA |        | -0.472 | 0.308  | 0.091  | -0.17  | -0.115 |      | 0.023  | -0.157 |
| A020692_01 |    | 0.464  | 0.457  | 0.255  | 0.136  | 0.317  | 0.304  | NA   |        | 0.349  |
| A020694_01 | NA | NA     |        | 0.344  | 0.215  | NA     | NA     |      | -0.929 | -1.159 |
| A020696_01 | NA | NA     |        | 0.487  | 0.187  | NA     | 0.083  |      | 0.297  | 0.031  |
| A020697_01 |    | -0.89  | -0.742 | -0.111 | 0.159  | -1.189 | -1.122 |      | -0.77  | -0.759 |
| A020699_01 |    | -0.396 | -0.172 | -0.455 | -0.404 | -0.032 | 0.353  |      | -0.04  | 0.227  |
| A020702_01 |    | 0.253  | 0.514  | -0.535 | -0.43  | -0.036 | 0.355  |      | -0.031 | 0.134  |
| A020703_01 |    | 0.722  | 0.138  | -0.104 | -0.106 | -0.053 | 0.002  |      | -0.051 | 0.247  |
| A020704_01 |    | -0.461 | -0.318 | -1.578 | -1.487 | -1.291 | -0.946 |      | -0.768 | NA     |
| A020705_01 |    | -1.047 | -0.853 | 0.36   | 0.236  | -0.034 | 0.006  |      | 0.187  | 0.148  |
| A020707_01 |    | -0.042 | 0.031  | 0.062  | 0.042  | 0.191  | 0.111  |      | 0.26   | 0.108  |
| A020708_01 |    | 0.677  | 0.639  | 0.233  | 0.409  | 0.13   | 0.117  |      | -0.08  | 0.094  |
| A020710_01 |    | 0.229  | 0.499  | 0.361  | 0.301  | 0.08   | 0.621  |      | 0.194  | 0.218  |
| A020713_01 | NA | NA     |        | 0.316  | 0.243  | NA     | NA     |      | -0.204 | -0.4   |
| A020714_01 |    | 0.367  | 0.435  | 0.081  | 0.013  | 0.281  | 0.413  |      | 0.445  | 0.387  |
| A020716_01 |    | 0.594  | 0.385  | 0.454  | 0.196  | 0.291  | 0.021  |      | 0.132  | 0.084  |
| A020722_01 | NA | NA     |        | 0.435  | 0.147  | -0.016 | NA     |      | 0.088  | -0.172 |
| A020725_01 |    | 0.024  | 0.046  | -0.236 | -0.104 | -0.255 | -0.065 |      | -0.139 | 0.133  |
| A020727_01 |    | -0.569 | -0.507 | -0.935 | -1.171 | -1.015 | -1.179 |      | -0.523 | -0.871 |
| A020728_01 |    | -1.488 | -1.258 | 0.018  | -0.102 | -0.736 | -0.635 |      | -0.028 | -0.051 |
| A020730_01 |    | -1.39  | -1.731 | -1.128 | -1.049 | -2.006 | -2.013 |      | -0.987 | -1.338 |
| A020731_01 |    | -2.19  | -1.47  | 0.338  | 0.394  | -0.023 | 0.259  |      | 0.107  | 0.299  |
| A020732_01 |    | -0.329 | -0.888 | -0.897 | -0.944 | -1.131 | -1.21  |      | -0.886 | -1.097 |
| A020733_01 |    | -0.108 | -0.708 | -1.098 | -1.076 | -0.991 | -1.463 |      | -0.822 | NA     |
| A020734_01 |    | -0.044 | -0.459 | -0.261 | -0.364 | 1.027  | 1.068  |      | 0.979  | 1.036  |
| A020735_01 |    | -1.549 | -1.126 | -0.536 | -0.516 | -1.415 | -1.16  |      | -0.896 | -1.073 |
| A020737_01 |    | -1.019 | -0.345 | 0.219  | 0.167  | 0.186  | 0.362  |      | 0.231  | 0.181  |
| A020738_01 |    | -0.71  | -0.369 | 0.083  | 0.12   | -0.446 | -0.241 |      | -0.176 | -0.059 |
| A020740_01 |    | 0.745  | 0.535  | -0.078 | -0.129 | 0.46   | 0.196  |      | 0.185  | 0.246  |
| A020741_01 |    | -0.188 | -0.003 | 0.372  | 0.122  | 0.415  | 0.357  |      | 0.468  | 0.462  |
| A020746_01 |    | 0.655  | 0.756  | 0.069  | 0.077  | 0.493  | 0.422  |      | 0.352  | 0.222  |
| A020748_01 |    | -1.777 | -0.974 | -0.254 | -0.076 | -0.239 | -0.316 |      | -0.224 | -0.149 |
| A020750_01 |    | 0.77   | 0.266  | 0.065  | -0.004 | 0.216  | 0.128  |      | 0.366  | 0.347  |
| A020751_01 |    | 0.379  | 0.707  | -0.001 | 0.064  | -0.212 | 0.675  |      | 0.511  | NA     |
| A020754_01 |    | -0.811 | -0.601 | -0.654 | -0.817 | -0.379 | -0.607 |      | -0.489 | -0.863 |
| A020756_01 |    | 0.468  | 0.238  | 0.421  | 0.173  | 0.715  | 0.375  |      | 0.415  | 0.417  |
| A020757_01 |    | 0.104  | 0.075  | 0.242  | 0.134  | 0.231  | 0.157  |      | 0.374  | 0.379  |
| A020759_01 |    | -0.555 | -0.437 | 0.211  | 0.196  | 0.002  | -0.003 |      | 0.03   | 0.006  |
| A020760_01 |    | 0.387  | 0.446  | 0.572  | 0.355  | 0.909  | 0.652  |      | 1.298  | 0.988  |
| A020761_01 |    | -0.695 | -0.014 | 0.242  | 0.246  | 0.383  | 0.601  |      | 0.447  | 0.587  |
| A020762_01 |    | -0.689 | NA     | 0.395  | -0.027 | -0.638 | -0.687 | NA   |        | -0.374 |
| A020763_01 |    | -0.305 | 0      | -0.384 | -0.254 | -0.731 | -0.221 |      | 0.08   | 0.148  |
| A020765_01 |    | 0.284  | 0.289  | 0.342  | 0.125  | 0.608  | 0.389  |      | 0.291  | 0.228  |
| A020766_01 |    | 0.203  | 0.005  | -0.119 | -0.119 | -0.101 | 0.146  |      | 0.205  | 0.414  |
| A020767_01 |    | 0.696  | 0.625  | 0.465  | 0.289  | 0.427  | 0.33   |      | 0.421  | 0.175  |
| A020769_01 | NA |        | -0.31  | 0.287  | 0.188  | -0.13  | NA     | NA   |        | 0.076  |

|            |    |           |        |           |           |           |        |          |        |
|------------|----|-----------|--------|-----------|-----------|-----------|--------|----------|--------|
| A020771_01 |    | -0.342    | -0.011 | 0.288     | 0.341     | 0.638     | 0.709  | 0.297    | 0.335  |
| A020774_01 |    | 0.299     | 0.089  | 0.176     | -0.046    | -0.403    | -0.231 | 0.204    | -0.001 |
| A020777_01 | NA | NA        |        | -0.641 NA | NA        | NA        |        | -0.318   | -0.636 |
| A020778_01 |    | -0.89     | -0.3   | 0.391     | 0.315     | -0.515    | -0.368 | -0.24    | -0.407 |
| A020780_01 |    | -0.022    | 0.363  | -0.095    | 0.326     | 0.247     | 0.409  | 0.229    | 0.522  |
| A020781_01 |    | -0.115    | -0.113 | 0.011     | 0.06      | -0.013    | -0.054 | 0.131    | 0.089  |
| A020784_01 |    | 0.155     | 0.328  | 0.246     | 0.028     | 0.427     | 0.44   | 0.788    | 0.797  |
| A020785_01 |    | 0.078     | 0.235  | -0.119    | -0.001    | 0.369     | 0.493  | 0.429    | 0.628  |
| A020788_01 | NA | NA        | NA     | NA        | NA        | NA        | NA     | NA       | NA     |
| A020795_01 |    | -0.84     | -0.066 | 0.321     | 0.41      | 0.074     | 0.548  | 0.081    | 0.236  |
| A020796_01 |    | -0.005    | 0.109  | 0.056     | -0.046    | 0.164     | 0.073  | 0.238    | 0.181  |
| A020797_01 |    | -0.593    | -0.373 | -0.703    | -0.37     | -0.849    | -0.378 | -0.717   | -0.313 |
| A020798_01 |    | 0.163     | 0.116  | -0.36     | -0.622    | 0.345     | 0.239  | 0.052    | -0.021 |
| A020799_01 |    | 0.09      | 0.007  | 0.055     | -0.071    | 0.238     | 0.079  | 0.221    | 0.016  |
| A020800_01 |    | 0.052     | -0.253 | -0.289 NA |           | 0.104     | -0.069 | 0.165    | 0.048  |
| A020802_01 |    | 0.475     | 0.38   | 0.111     | 0.039     | 0.193     | 0.248  | 0.161    | 0.173  |
| A020803_01 |    | -0.109    | 0.009  | 0.491     | 0.41      | 0.252     | 0.311  | -0.255   | -0.304 |
| A020806_01 |    | 0.606     | 0.758  | 0.074     | 0.017     | 0.673     | 0.972  | 0.439    | 0.641  |
| A020807_01 |    | -0.444    | -0.09  | -0.22     | -0.047    | -0.038    | 0.052  | 0.062    | 0.179  |
| A020809_01 |    | 0.216     | 0.143  | 0.121     | 0.012     | 0.34      | -0.066 | 0.118    | -0.086 |
| A020811_01 |    | 0.639     | 0.577  | 0.414     | 0.194     | 0.731     | 0.214  | 0.342    | 0.055  |
| A020813_01 | NA | NA        |        | -0.496    | -0.427 NA | NA        |        | -0.428   | -0.36  |
| A020816_01 |    | -0.588    | -0.287 | 0.254     | 0.083     | 0.588     | 0.407  | 0.392    | 0.221  |
| A020817_01 |    | -0.032    | -0.399 | -0.367    | -0.506    | -0.057    | -0.084 | -0.113   | 0.024  |
| A020818_01 |    | -0.107    | -0.121 | -0.147    | -0.2      | -0.354    | -0.271 | -0.109   | -0.234 |
| A020819_01 |    | 0.318     | 0.532  | 0.432     | 0.579     | 0.471     | 0.566  | 0.163    | 0.365  |
| A020820_01 |    | -0.915    | -0.539 | -0.145    | -0.138    | -0.181    | -0.067 | -0.157   | -0.224 |
| A020821_01 |    | -0.022 NA |        | 0.323     | 0.216     | 0.365     | 0.032  | 0.263    | -0.003 |
| A020823_01 |    | -0.775 NA |        | 0.333     | 0.226     | 0.191     | 0.231  | 0.131    | 0.09   |
| A020825_01 |    | 0.05      | -0.184 | 0.125     | 0.086     | 0.057     | -0.213 | -0.135   | -0.307 |
| A020826_01 |    | 0.603     | 0.703  | 0.409     | 0.331     | 0.163     | 0.349  | 0.102    | 0.335  |
| A020827_01 |    | 0.367     | 0.476  | 0.328     | 0.216     | 0.479 NA  |        | 0.633    | 0.369  |
| A020828_01 |    | -0.956    | -0.172 | 0.29      | 0.185     | 0.973     | 0.695  | 0.657    | 0.624  |
| A020831_01 |    | 0.913     | 0.465  | -0.427    | -0.467    | 0.434     | 0.207  | 0.547    | 0.583  |
| A020835_01 |    | -0.796    | -0.724 | -0.384    | -0.2      | -1.406    | -1.072 | -0.681   | -0.548 |
| A020836_01 |    | 0.173     | -0.131 | -0.474    | -0.524    | 0.805     | 0.67   | 0.576    | 0.473  |
| A020838_01 |    | -0.151    | -0.028 | 0.009     | 0.081     | -0.291    | -0.358 | -0.1     | -0.058 |
| A020839_01 |    | 0.653     | 0.408  | -0.227    | -0.056    | 0.258     | 0.348  | 0.22     | 0.198  |
| A020841_01 |    | 0.182     | 0.332  | -0.468    | -0.353    | 0.083     | 0.537  | 0.314    | 0.744  |
| A020842_01 |    | -0.79     | -0.705 | -0.819    | -0.708    | -1.013    | -0.668 | -0.633   | -0.501 |
| A020843_01 |    | -0.495 NA |        | -0.515    | -0.559    | -0.558    | -0.875 | -0.656   | -0.773 |
| A020844_01 |    | -0.997    | -0.763 | 0.136     | 0.145     | -0.359    | -0.297 | -0.283   | -0.425 |
| A020845_01 |    | -0.297    | -0.14  | 0.335     | 0.297     | -0.197    | -0.073 | 0.028    | -0.02  |
| A020847_01 |    | 0.193     | 0.106  | 0.248     | 0.265     | -0.63     | -0.443 | -0.678   | -0.516 |
| A020849_01 |    | 0.591     | 0.39   | -0.03     | -0.036    | 0.242     | 0.213  | 0.199    | 0.173  |
| A020850_01 |    | 0.172     | 0.108  | -0.423    | -0.181    | 0.118     | 0.141  | 0.11     | 0.368  |
| A020852_01 |    | -1.503    | -1.313 | -0.479    | -0.349    | -1.041    | -0.814 | -0.424   | -0.524 |
| A020853_01 |    | 0.242     | 0.344  | -0.487    | -0.393    | 0.293     | 0.627  | 0.482    | 0.729  |
| A020854_01 | NA | NA        |        | 0.586     | 0.28 NA   | NA        |        | 0.388 NA |        |
| A020855_01 |    | 0.82      | 1.065  | 0.192     | 0.384     | 0.327     | 0.971  | 0.422    | 0.829  |
| A020860_01 |    | -0.254    | -0.156 | 0.152     | -0.118    | 0.011     | -0.079 | 0.063    | -0.194 |
| A020861_01 |    | 0.147     | 0.118  | -0.478    | -0.267    | -0.337    | -0.375 | -0.398   | -0.313 |
| A020863_01 |    | -0.968    | -0.124 | 0.382     | 0.117     | -0.141    | 0.057  | 0.402    | 0.151  |
| A020866_01 | NA | NA        |        | -0.247    | -0.353    | -0.608 NA |        | -0.085   | -0.306 |
| A020868_01 |    | -1.217    | -0.559 | 0.062     | 0.121     | -1.147    | -0.692 | -0.473   | -0.656 |
| A020869_01 |    | -0.287    | -0.181 | 0.869     | 0.646     | 0.238     | 0.273  | 0.283    | 0.127  |
| A020870_01 |    | 0.957     | 0.664  | -0.401    | -0.363    | -0.575    | -0.617 | -0.555   | -0.53  |
| A020871_01 |    | 0.446     | 0.231  | -0.272    | -0.16     | 0.001     | 0.138  | 0.079    | 0.16   |
| A020872_01 |    | 0.421     | 0.055  | -0.048    | -0.22     | -0.155    | -0.313 | -0.127   | -0.342 |
| A020873_01 |    | -0.534    | -0.234 | -0.044    | -0.078    | 0.012     | 0.083  | 0.267    | 0.203  |
| A020876_01 |    | 0.25      | 0.224  | -0.001    | -0.011    | 0.216     | 0.106  | 0.09     | -0.065 |
| A020879_01 |    | -0.044    | 0.123  | 0.185     | 0.234     | -0.108    | -0.03  | -0.123   | 0.015  |
| A020880_01 |    | 0.363     | 0.982  | 0.408     | 0.41      | 0.016     | 0.106  | -0.013   | 0.142  |
| A020881_01 |    | 0.521     | 0.575  | 0.272     | 0.195     | 0.414     | 0.507  | 0.465    | 0.51   |
| A020882_01 |    | 0.184     | 0.034  | -0.573    | -0.44     | -0.105    | 0.036  | -0.003   | 0.167  |
| A020883_01 |    | 0.219 NA  |        | 0.179     | -0.116    | -0.722    | -0.843 | -0.494   | -0.574 |
| A020889_01 |    | 0.423     | 0.574  | -0.084    | 0.002     | 0.069     | 0.689  | 0.374    | 0.79   |
| A020892_01 |    | 0.116     | -0.214 | -0.129    | -0.216    | -0.128    | 0.228  | -0.024   | 0.259  |

|            |    |        |        |        |        |    |        |        |        |
|------------|----|--------|--------|--------|--------|----|--------|--------|--------|
| A020900_01 | NA |        | -0.245 | -0.665 | -0.548 | NA | -0.321 | -0.214 | -0.335 |
| A020902_01 |    | -1.317 | -0.498 | 0.362  | 0.307  |    | -0.295 | -0.076 | -0.13  |
| A020905_01 |    | -0.699 | -0.543 | -0.98  | -1.026 |    | -0.589 | -0.679 | NA     |
| A020906_01 |    | -0.789 | -0.45  | 0.068  | -0.055 |    | -0.245 | -0.151 | 0.25   |
| A020910_01 |    | -0.338 | -0.592 | -1.192 | -0.942 |    | -0.845 | -1.011 | -0.77  |
| A020916_01 |    | -0.802 | -0.583 | -0.1   | -0.038 |    | -0.671 | -0.589 | -0.454 |
| A020917_01 |    | 0.686  | 0.692  | 0.443  | 0.485  |    | 0.344  | 0.968  | 0.433  |
| A020919_01 |    | -1.31  | -1.334 | -0.614 | -0.627 |    | -1.564 | -1.477 | -1.015 |
| A020924_01 |    | -0.333 | NA     |        | 0.092  |    | 0.14   | 0.056  | -0.266 |
| A020926_01 |    | -0.35  | 0.023  | -0.533 | -0.475 |    | -0.093 | 0.336  | 0.086  |
| A020928_01 |    | -0.455 | -0.284 | 0.1    | 0.192  |    | -0.502 | -0.387 | -0.338 |
| A020929_01 |    | 0.264  | 0.532  | 0.093  | 0.212  |    | 0.533  | 0.855  | 0.765  |
| A020930_01 |    | -1.888 | -2.095 | -2.523 | -2.11  |    | -2.479 | -1.872 | -1.568 |
| A020934_01 |    | 0.313  | 0.195  | -0.357 | -0.573 |    | 0.601  | 0.309  | 0.1    |
| A020937_01 |    | 0.252  | -0.159 | -0.061 | -0.303 |    | -0.317 | -0.396 | -0.157 |
| A020943_01 |    | -0.675 | -0.404 | -0.389 | -0.291 |    | -0.286 | -0.152 | -0.388 |
| A020944_01 |    | -0.355 | NA     |        | -0.037 |    | -0.15  | -0.211 | -0.353 |
| A020949_01 |    | 0.653  | 0.465  | -0.133 | -0.247 |    | 0.428  | 0.346  | 0.162  |
| A020952_01 |    | -0.217 | 0.405  | -0.172 | -0.164 |    | 0.179  | 0.29   | 0.359  |
| A020955_01 |    | -0.236 | -0.007 | 0.381  | 0.405  |    | 0.248  | 0.305  | -0.333 |
| A020958_01 |    | -0.333 | 0.006  | 0.293  | 0.263  |    | 0.139  | 0.393  | 0.251  |
| A020959_01 |    | -0.228 | 0.09   | 0.179  | 0.245  |    | -0.51  | -0.28  | -0.264 |
| A020960_01 |    | 0.577  | 0.623  | 0.036  | 0.084  |    | 0.523  | 0.646  | 0.43   |
| A020961_01 | NA |        | NA     | 0.136  | NA     |    | NA     |        | 0.689  |
| A020964_01 |    | 1.23   | 0.917  | 0.445  | 0.206  |    | NA     | 0.485  | 0.438  |
| A020965_01 |    | -0.76  | -0.413 | 0.106  | 0.036  |    | -0.141 | -0.019 | -0.017 |
| A020970_01 |    | -0.866 | -0.744 | -0.232 | -0.252 |    | -0.625 | -0.538 | -0.23  |
| A020971_01 |    | 0.749  | 0.826  | -1.554 | -1.137 |    | -1.637 | -0.97  | -1.56  |
| A020974_01 |    | -0.553 | -0.507 | -1.174 | -1.102 |    | -1.195 | -0.632 | -0.36  |
| A020976_01 | NA |        | NA     | 0.185  | -0.14  |    | NA     |        | 0.675  |
| A020978_01 |    | -1.09  | -1.571 | NA     | NA     |    | -1.796 | -1.686 | -1.409 |
| A020980_01 |    | 0.5    | 0.672  | 0.013  | 0.181  |    | 0.649  | 0.995  | 0.71   |
| A020981_01 |    | -0.301 | -0.416 | -0.413 | -0.267 |    | -0.669 | -0.405 | -0.382 |
| A020982_01 |    | -0.585 | -0.073 | 0.063  | 0.057  |    | -0.036 | 0.033  | -0.011 |
| A020985_01 |    | -0.058 | -0.046 | -0.303 | -0.293 |    | 0.098  | 0.06   | 0.082  |
| A020987_01 |    | -0.372 | -0.432 | 0.36   | 0.205  |    | -0.29  | -0.311 | 0.123  |
| A020991_01 |    | 0.203  | 0.11   | 0.094  | -0.054 |    | 0.271  | 0.173  | 0.308  |
| A020992_01 |    | 0.278  | 0.472  | 0.032  | 0.157  |    | 0.213  | 0.533  | 0.417  |
| A020997_01 |    | -0.428 | -0.143 | 0.285  | 0.163  |    | -0.378 | -0.278 | -0.279 |
| A020998_01 |    | -1.16  | -1.245 | -0.914 | -0.684 |    | -0.98  | -0.749 | -0.437 |
| A020999_01 |    | -0.693 | -0.804 | -0.694 | -0.515 |    | -0.701 | -0.723 | -0.618 |
| A021002_01 |    | -1.097 | -0.312 | -0.148 | -0.049 |    | 0.052  | 0.127  | 0.272  |
| A021003_01 | NA |        | NA     | -0.121 | -0.13  |    | NA     |        | -0.378 |
| A021005_01 | NA |        | NA     | 0.142  | 0.127  |    | NA     |        | -0.293 |
| A021009_01 |    | 0.115  | 0.139  | 0.115  | -0.215 |    | 0.399  | 0.275  | 0.587  |
| A021010_01 |    | -0.91  | -0.93  | -1.264 | -0.873 |    | -1.13  | -0.781 | -0.758 |
| A021011_01 |    | -0.24  | -0.1   | -0.467 | -0.23  |    | 0.079  | 0.33   | 0.156  |
| A021012_01 |    | 0.407  | 0.316  | -0.109 | -0.317 |    | -0.075 | -0.051 | -0.307 |
| A021015_01 |    | -0.453 | -0.234 | 0.085  | 0.054  |    | 0.132  | 0.11   | 0.075  |
| A021019_01 |    | -0.056 | -0.034 | 0.066  | 0.085  |    | 0.053  | 0.219  | 0.063  |
| A021021_01 |    | -2.056 | -1.396 | -0.681 | -0.537 |    | -0.507 | -0.582 | -0.673 |
| A021025_01 |    | 0.103  | 0.175  | -0.096 | -0.093 |    | -0.25  | -0.114 | 0.197  |
| A021026_01 |    | -1.168 | -1.101 | -1.69  | -1.409 |    | -2.363 | -2.077 | -1.839 |
| A021034_01 |    | -0.631 | -1.056 | 0.255  | 0.238  |    | -1.791 | -1.619 | -1.272 |
| A021035_01 |    | -0.016 | 0.183  | 0.264  | 0.256  |    | -0.167 | 0.133  | 0.208  |
| A021037_01 |    | -1.32  | NA     |        | -0.702 |    | -0.599 | NA     | -1.937 |
| A021040_01 |    | -1.153 | -0.812 | -0.32  | -0.27  |    | -1.339 | -0.755 | -0.79  |
| A021041_01 |    | 0.47   | 0.718  | 0.03   | 0.019  |    | -0.725 | -0.427 | -0.281 |
| A021042_01 |    | -0.231 | 0.056  | -0.771 | -0.576 |    | -0.782 | -0.59  | 0.285  |
| A021044_01 |    | -0.988 | -0.769 | -1.786 | -1.744 |    | -2.544 | -1.87  | -1.443 |
| A021045_01 |    | -0.83  | -0.579 | 0.447  | 0.291  |    | -0.314 | -0.384 | 0.095  |
| A021046_01 |    | -0.847 | -0.823 | -0.634 | -0.583 |    | -0.616 | -0.329 | -0.23  |
| A021047_01 |    | -0.508 | -0.118 | -0.056 | -0.044 |    | -0.335 | 0.054  | 0.137  |
| A021048_01 |    | 0.303  | 0.173  | -0.491 | -0.507 |    | -0.174 | -0.366 | NA     |
| A021049_01 |    | -1.15  | -1.355 | -0.545 | -0.555 |    | -0.904 | -0.819 | -0.447 |
| A021051_01 |    | -1.796 | -1.845 | 0.827  | 0.409  |    | -1.659 | -0.814 | -0.466 |
| A021053_01 |    | -0.607 | -0.792 | -1.084 | -0.742 |    | -1.364 | -1.198 | -0.991 |
| A021055_01 |    | -0.274 | -0.414 | 0.338  | 0.069  |    | -0.579 | -0.499 | 0.144  |

|            |    |           |        |        |           |           |        |           |        |
|------------|----|-----------|--------|--------|-----------|-----------|--------|-----------|--------|
| A021057_01 |    | -1.021    | -0.623 | -0.223 | -0.207    | -0.171    | -0.201 | 0.133     | -0.171 |
| A021058_01 |    | 0.798     | 0.707  | 0.554  | 0.439     | -0.035    | 0.272  | 0.358     | 0.448  |
| A021059_01 |    | -0.666    | -0.715 | -0.88  | -0.57     | -0.94     | -0.634 | -0.522    | -0.18  |
| A021061_01 | NA | NA        |        | 0.104  | -0.079 NA | NA        |        | 0.139     | -0.121 |
| A021062_01 |    | -0.317    | -0.402 | -0.662 | -0.745    | -0.484    | -0.392 | -0.112    | -0.326 |
| A021063_01 |    | -0.321    | -0.056 | -0.157 | -0.196    | -0.53     | -0.045 | 0.289     | 0.114  |
| A021064_01 |    | 0.321     | 0.309  | -0.219 | -0.168    | -0.065    | 0.055  | 0.087     | 0.15   |
| A021065_01 |    | -0.709    | -0.221 | 0.242  | 0.104     | -0.689    | -0.213 | -0.345    | -0.588 |
| A021066_01 |    | 0.59 NA   | NA     | NA     |           | -0.096 NA | NA     | NA        |        |
| A021067_01 | NA | NA        |        | 0.325  | 0.319 NA  | NA        |        | -0.213    | -0.389 |
| A021068_01 |    | 0.381     | 0.283  | 0.329  | 0.111     | 0.549     | 0.295  | 0.391     | -0.05  |
| A021069_01 |    | 0.165     | 0.398  | 0.463  | 0.263     | -0.026    | -0.019 | 0.019     | -0.162 |
| A021070_01 |    | -1.059    | -0.427 | -0.565 | -0.154    | -0.22     | 0.206  | 0.099     | 0.51   |
| A021071_01 |    | -0.069    | 0.526  | -0.297 | -0.057    | 0.481     | 1.366  | 0.752     | 1.2    |
| A021072_01 |    | 0.779     | 1.304  | 0.117  | 0.232     | 0.151     | 1.234  | 1.108     | 1.148  |
| A021073_01 |    | 0.25      | 0.057  | -0.108 | -0.2      | -0.283    | -0.209 | -0.332    | -0.382 |
| A021074_01 | NA | NA        |        | -1.621 | -1.493 NA | NA        |        | -1.201    | -1.594 |
| A021076_01 | NA | NA        |        | -0.99  | -1.076 NA | NA        | NA     | NA        |        |
| A021078_01 |    | -1.071    | -0.507 | 0.122  | 0.127     | -0.928    | -0.649 | -0.368    | -0.351 |
| A021079_01 |    | -0.583    | -0.314 | 0.582  | 0.417     | 0.538     | 0.538  | 0.165     | 0.084  |
| A021081_01 |    | -1.604    | -1.361 | 0.488  | 0.472     | -1.494    | -1.345 | -0.59     | -0.706 |
| A021084_01 |    | -0.14     | 0.137  | -0.042 | 0.096     | -0.129    | 0.132  | 0.104     | 0.148  |
| A021085_01 |    | -0.419 NA |        | 0.337  | 0.094     | 0.256     | -0.017 | 0.31      | 0.122  |
| A021086_01 |    | 0.459     | 0.343  | 0.276  | 0.197     | 0.4       | 0.304  | 0.24      | 0.123  |
| A021088_01 |    | -0.149    | 0.21   | 0.013  | -0.026    | -0.289    | 0.188  | 0.086     | 0.219  |
| A021089_01 | NA |           | -0.45  | -0.316 | -0.256    | 0.565     | 0.498  | 0.221     | 0.264  |
| A021093_01 |    | -1.41     | -0.348 | 0.287  | 0.125     | 0.967     | 0.774  | 0.659     | 0.56   |
| A021094_01 |    | 0.201     | 0.329  | -0.139 | -0.06     | 0.287     | 0.666  | 0.33      | 0.562  |
| A021097_01 |    | 0.051     | 0.386  | -0.403 | -0.459    | 0.236     | 0.553  | 1.025     | 1.202  |
| A021099_01 |    | -0.747    | -0.224 | 0.027  | 0.087     | 0.065     | 0.01   | 0.007     | 0.019  |
| A021100_01 |    | -0.726    | -0.661 | -0.276 | -0.327    | -0.787    | -0.517 | -0.128    | -0.363 |
| A021102_01 |    | 0.41      | 0.363  | 0.028  | -0.025    | 0.26      | 0.228  | 0.262     | 0.349  |
| A021103_01 |    | -0.428 NA |        | -0.199 | -0.222    | -1        | -0.926 | -0.633    | -0.285 |
| A021104_01 |    | 0.43      | 0.519  | -0.405 | -0.256    | 0.312     | 0.447  | 0.155     | 0.476  |
| A021106_01 |    | 0.029     | -0.098 | -0.087 | -0.099    | -0.49     | -0.43  | -0.26     | -0.235 |
| A021107_01 |    | -0.609    | -0.882 | -0.715 | -0.892    | -0.752 NA |        | -0.651 NA |        |
| A021108_01 | NA | NA        |        | -0.86  | -0.972    | 0.636     | 0.28   | -0.819    | -0.876 |
| A021109_01 | NA | NA        |        | 0.636  | 0.322 NA  | NA        |        | 0.212     | 0.107  |
| A021110_01 |    | 0.465     | 0.253  | 0.046  | -0.232    | 0.372     | 0.109  | 0.29      | 0.027  |
| A021111_01 |    | 0.379     | 0.303  | -0.142 | -0.12     | 0.545     | 0.413  | 0.452     | 0.422  |
| A021112_01 |    | 0.228     | 0.372  | -0.156 | 0.065     | -0.349    | -0.149 | -0.08     | 0.105  |
| A021113_01 |    | 0.541     | -0.005 | -0.071 | -0.056    | -0.73     | -0.9   | -0.493    | -0.394 |
| A021117_01 |    | 0.402     | 0.269  | -0.077 | 0.051     | -0.153    | 0.088  | -0.132    | -0.038 |
| A021118_01 |    | -0.808    | -0.314 | -0.414 | -0.567    | -0.231    | -0.183 | 0.054     | -0.263 |
| A021119_01 |    | -0.324    | -0.234 | 0.067  | -0.055    | -0.205    | -0.12  | 0.092     | -0.269 |
| A021120_01 |    | -0.712 NA |        | -0.145 | -0.165    | 0.04      | 0.075  | 0.416     | 0.334  |
| A021121_01 |    | -0.65     | -0.207 | -0.082 | -0.111    | -0.379    | -0.117 | 0.137     | 0.29   |
| A021123_01 |    | -0.218    | -0.318 | 0.217  | -0.021 NA |           | -0.351 | -0.166    | -0.498 |
| A021124_01 |    | 0.447     | 0.208  | -0.155 | -0.241    | 0.047     | 0.139  | 0.227     | 0.282  |
| A021125_01 |    | -0.246    | -0.094 | 0.536  | 0.279     | 0.143     | 0.093  | 0.17      | -0.158 |
| A021126_01 |    | 0.044     | 0.066  | 0.424  | 0.318     | 0.241     | 0.218  | 0.14      | 0.037  |
| A021127_01 |    | 0.012     | 0.155  | -0.32  | -0.472    | -0.036    | -0.248 | -0.048    | -0.431 |
| A021128_01 |    | 0.286     | 0.313  | 0.149  | 0.259     | -0.028    | -0.262 | -0.263    | -0.3   |
| A021129_01 |    | 0.214     | 0.538  | 0.007  | -0.007    | 0.549     | 0.411  | 0.283     | 0.294  |
| A021130_01 |    | -0.409    | -0.067 | -0.183 | -0.073    | 0.397     | 0.353  | 0.307     | 0.246  |
| A021131_01 |    | -2.065    | -0.506 | -0.281 | -0.054    | -0.251    | 0.05   | -0.046    | 0.056  |
| A021132_01 |    | 0.539     | 0.409  | -0.075 | -0.068    | -0.229    | -0.14  | 0.022     | 0.22   |
| A021133_01 |    | -1.611    | -1.36  | -1.176 | -0.946    | -0.789    | -0.537 | -0.393    | -0.332 |
| A021134_01 |    | -0.259    | -0.033 | -0.015 | -0.221    | -0.083    | -0.136 | 0.134     | -0.133 |
| A021136_01 |    | -0.059    | -0.099 | -0.411 | -0.436    | 0.121     | -0.028 | 0.146     | 0.022  |
| A021137_01 |    | 0.756     | 1.224  | 0.128  | 0.258     | 0.753     | 1.222  | 1.103     | 1.353  |
| A021139_01 |    | 1.062     | 0.583  | 0.282  | 0.108     | 0.613     | 0.49   | 0.179 NA  |        |
| A021140_01 | NA |           | 0.365  | -0.318 | -0.354 NA |           | 0.789  | 0.385     | 0.834  |
| A021142_01 |    | 0.793     | 0.762  | 0.081  | 0.046     | 0.646     | 0.682  | 0.674     | 0.788  |
| A021146_01 |    | 0.707     | 0.498  | -0.318 | -0.272    | 0.132     | 0.265  | 0.09      | 0.39   |
| A021147_01 |    | 0.52      | 0.65   | -0.511 | -0.376    | 0.221     | 0.89   | 0.275     | 0.706  |
| A021148_01 |    | 0.564     | 0.558  | -0.532 | -0.384    | 0.436     | 0.831  | 0.541     | 0.856  |
| A021149_01 |    | 1.016 NA  |        | 0.282  | 0.188     | 0.539     | 1.296  | 0.488     | 1.03   |

|               |          |          |          |           |           |           |           |        |
|---------------|----------|----------|----------|-----------|-----------|-----------|-----------|--------|
| A021150_01    | 0.634    | 0.706    | -0.495   | -0.537    | -0.665    | -0.574    | -0.639    | -0.072 |
| A021160_01    | 0.46     | 0.319    | -0.101   | 0.054     | 0.189     | 0.488     | 0.102     | 0.448  |
| A021195_01    | 1.087    | 0.663    | 0.208    | 0.162 NA  |           | 0.042     | -0.03     | -0.063 |
| A021200_01    | 0.281    | -0.016   | -0.238   | -0.219    | -0.632    | -0.496    | -0.534    | -0.466 |
| A021206_01    | 0.918    | 0.696    | -0.142   | -0.014    | 0.078     | -0.154    | -0.188    | -0.155 |
| A021207_01    | 0.504    | 0.317    | 0.344    | 0.209     | 0.235     | 0.27      | 0.065     | -0.036 |
| A021208_01    | 0.401    | 0.146    | 0.312 NA | NA        | NA        |           | -0.007    | -0.097 |
| A021209_01    | 1.103 NA |          | 0.216    | 0.129 NA  |           | 0.854     | 0.568     | 0.501  |
| A021212_01    | -0.501   | -0.931   | 0.12     | -0.074    | -0.642    | -0.758    | -0.335    | -0.607 |
| A021213_01    | -0.099   | -0.249   | -0.07    | -0.208    | -0.353    | -0.399    | -0.148    | -0.312 |
| A021214_01    | -0.045   | -0.492   | -0.31    | -0.291    | -0.497    | -0.265    | -0.073    | -0.372 |
| A021218_01    | 0.123    | -0.092   | -0.131   | -0.089    | 0.032     | -0.061    | -0.113    | -0.163 |
| A021219_01    | -1.18    | -0.492   | 0.73     | 0.668     | -0.642    | -0.13     | -0.12     | -0.07  |
| A021220_01    | -0.538   | -0.244   | -0.335   | -0.174    | -0.291    | 0.054     | -0.028    | 0.067  |
| A021222_01    | -1.159   | -0.963   | -0.902   | -0.665    | -1.325    | -0.675    | -0.517    | -0.573 |
| A021223_01    | 0.416    | 0.154    | -0.469   | -0.263    | -0.057    | 0.122     | -0.098    | 0.065  |
| A021224_01    | 0.546    | 0.28     | -0.271   | -0.281    | -0.262    | -0.374    | -0.567    | -0.617 |
| A021225_01    | -0.269   | -0.067   | -0.362   | -0.254    | -0.111    | -0.178    | -0.126    | -0.066 |
| A021227_01    | 0.816 NA | NA       | NA       | NA        |           | -0.665    | -0.288 NA |        |
| A021230_01    | 0.664    | 0.748    | -1.454   | -1.113    | 1.552     | 1.725     | 1.852     | 2.09   |
| A021233_01    | -0.937   | -1.118   | -0.599   | -0.576    | -1.076    | -0.908    | -0.56     | -0.698 |
| A021234_01    | 0.1      | 0.143    | 0.144    | 0.116     | 0.174     | 0.022     | -0.028    | -0.057 |
| A021235_01    | -0.021   | -0.417   | -0.09    | -0.278    | -0.491    | -0.559    | -0.333    | -0.439 |
| A021238_01    | 0.65     | 0.364    | -0.018   | -0.098    | 0.156     | 0.03      | 0.224     | 0.158  |
| A021239_01    | 0.651    | 0.492    | -0.026   | -0.078    | 0.356     | 0.415     | 0.3       | 0.281  |
| A021241_01    | 0.286    | 0.151    | 0.206    | 0.11      | 0.085     | 0.18      | 0.168     | 0.168  |
| A021249_01    | 0.375    | 0.57     | -0.273   | 0.113     | 1.074     | 1.929     | 1.56      | 2.016  |
| A021252_01    | -1.061   | -1.094   | -0.796   | -0.534    | -1.171    | -0.796    | -0.586    | -0.545 |
| A021253_01    | -2.337   | -1.67    | -0.805   | -0.474    | -1.812    | -1.259    | -1.079    | -0.865 |
| A021261_01    | -1.408   | -1.411   | -0.368   | -0.309    | -1.201    | -0.989    | -0.702    | -0.698 |
| A021267_01 NA |          | 0.044    | -0.223   | -0.196    | 0.384     | -0.14     | -0.152    | -0.112 |
| A021269_01 NA |          | 0.146    | 0.118    | -0.061 NA |           | 0.187     | 0.153     | 0.176  |
| A021274_01    | -0.749   | -1.275   | -0.718   | -0.548    | -1.017    | -1.063    | -0.922    | -0.83  |
| A021276_01    | 0.647    | 0.41     | 0.287    | 0.258     | 0.366     | 0.285     | 0.004     | 0.02   |
| A021293_01 NA |          | -0.541   | -0.782   | -0.789    | -0.509 NA |           | -0.477    | -0.314 |
| A021294_01    | 0.377    | 0.361    | 0.196    | 0.132     | 0.362     | 0.393     | 0.104     | 0.191  |
| A021295_01    | 0.175    | 0.171    | 0.222    | 0.289     | 0.28      | 0.194     | 0.07      | 0.3    |
| A021299_01    | -0.461   | -0.738   | -0.924   | -0.936    | -0.659    | -0.749    | -0.742    | -0.671 |
| A021303_01    | -0.816   | -0.676   | -0.157   | -0.048    | -0.844    | -0.907    | -0.599    | -0.52  |
| A021309_01    | 1.004    | 0.948    | 0.714    | 0.538     | 0.5       | 0.664     | 0.582     | 0.475  |
| A021313_01    | -0.213   | 0.215    | 0.043    | 0.105     | -0.048    | 0.678     | 0.741     | 0.866  |
| A021323_01 NA | NA       |          | 0.106 NA | NA        | NA        |           | -0.228 NA |        |
| A021335_01 NA | NA       | NA       | 0.391    | 0.261     | 0.58      | 0.554     | 0.319     | 0.455  |
| A021338_01    | 0.018    | -0.659   | -1.089   | -0.937    | -0.978    | -1.077 NA |           | -0.984 |
| A021339_01    | 0.676    | 0.323    | 0.196 NA |           | 0.577     | 0.548     | 0.675     | 0.834  |
| A021340_01    | 0.512    | -0.203   | -0.408   | -0.346    | -0.095    | 0.07      | -0.11     | 0      |
| A021341_01    | 0.126    | -0.04    | -0.226   | -0.196    | -0.026    | -0.015    | -0.205    | 0.028  |
| A021342_01    | 0.029    | -0.015   | -0.474   | -0.44     | -0.084    | -0.073    | -0.075    | -0.205 |
| A021344_01    | -1.865   | -1.578   | -0.342   | -0.292    | -1.48     | -1.16     | -0.829    | -0.899 |
| A021347_01    | 0.297    | 0.456    | 0.405    | 0.404     | 0.34      | 0.31      | 0.14      | 0.132  |
| A021354_01    | 1        | 0.896 NA |          | -0.068    | 0.232     | 0.947     | 0.575     | 0.775  |
| A021368_01    | -0.145   | 0.124    | -0.143   | -0.058    | -0.339    | -0.088    | -0.27     | -0.112 |
| A021372_01    | -0.241   | -0.013   | 0.056    | 0.133     | 0.147     | 0.379     | 0.189     | 0.304  |
| A021375_01    | 0.046    | 0.41     | 0.221    | 0.157     | 0.505     | 0.638     | 0.368     | 0.66   |
| A021377_01    | 0.21     | 0.29     | 0.269    | 0.333     | 0.647     | 1.233     | 0.5       | 1.017  |
| A021389_01    | -0.546   | -1.008   | -0.514   | -0.44     | -0.959    | -0.938    | -0.647    | -0.615 |
| A021392_01    | 0.085    | 0.106    | -0.325   | -0.288    | 0.246     | 0.27      | 0.286     | 0.213  |
| A021395_01    | -0.506   | -0.219   | -0.252   | -0.184    | 0.011     | 0.042     | -0.096    | 0.048  |
| A021401_01    | 0.442    | 0.07     | -0.031   | -0.136    | 0.242     | 0.158     | 0.172     | 0.205  |
| A021411_01 NA | NA       | NA       | -2.228   | -2.018 NA | NA        |           | -1.942 NA |        |
| A021413_01    | -0.711   | -0.467   | 0.432    | 0.198     | 0.275     | -0.024    | 0.085     | -0.077 |
| A021419_01    | 0.353    | 0.65     | -0.731   | -0.752    | 1.209     | 1.192     | 1.636     | 1.566  |
| A021427_01    | 0.264    | 0.24     | -0.109   | 0.005     | 0.076     | 0.25      | 0.136     | 0.099  |
| A021428_01 NA | NA       | NA       | 0.085    | -0.276 NA | NA        |           | -0.346    | -0.745 |
| A021434_01    | -0.624   | -0.845   | -0.968   | -0.752    | -1.075    | -0.805    | -1.063    | -0.822 |
| A021438_01    | -0.283   | 0.084    | -0.013   | -0.036    | -0.28     | -0.054    | 0.061     | 0.032  |
| A021440_01    | 0.659    | 0.306    | -0.06    | -0.088    | -0.043    | -0.017    | -0.109    | 0.085  |
| A021441_01    | 0.175    | 0.305    | -0.037   | 0.086     | 0.57      | 0.637     | 0.262     | 0.679  |



|            |           |        |           |           |           |           |           |        |
|------------|-----------|--------|-----------|-----------|-----------|-----------|-----------|--------|
| A021444_01 | -0.031    | 0.061  | -0.31     | -0.185    | -0.389    | -0.249    | -0.125    | -0.062 |
| A021451_01 | 0.591     | 0.378  | -0.099    | 0.018     | 0.209     | 0.335     | 0.289     | 0.259  |
| A021454_01 | 0.563     | 0.236  | -0.423    | -0.426    | -0.125    | 0.044     | -0.289    | -0.246 |
| A021462_01 | 0.032     | -0.191 | 0.224     | 0.135     | -0.103    | -0.259    | 0.102     | -0.032 |
| A021464_01 | -0.585 NA |        | 0.366     | 0.061 NA  |           | -0.986    | -0.179    | -0.516 |
| A021466_01 | 0.069 NA  |        | 0.554     | 0.659     | 0.62 NA   |           | 0.176     | 0.388  |
| A021467_01 | -0.254 NA |        | -0.071    | -0.098    | -0.419 NA |           | -0.274    | -0.324 |
| A021472_01 | NA        | -0.855 | -0.157    | -0.196 NA | NA        |           | -0.274    | -0.486 |
| A021474_01 | 0.14      | 0.113  | 0.196     | 0.232     | 0.184     | 0.033     | 0.002     | 0.078  |
| A021476_01 | -0.585    | -0.859 | -0.408    | -0.528    | -0.82     | -0.846    | -0.609    | -0.642 |
| A021491_01 | 0.069     | -0.096 | -0.332    | -0.354    | 0.028     | 0.174     | 0.021     | -0.018 |
| A021492_01 | 0.617     | 0.358  | -0.359    | -0.177    | -0.042    | 0.073     | -0.017    | 0.101  |
| A021494_01 | -0.795    | -0.986 | -0.742    | -0.652    | -1.117    | -0.883    | -0.788    | -0.646 |
| A021497_01 | -0.933    | -0.955 | -1.192    | -0.863    | -1.242    | -1.106    | -1.268    | -0.957 |
| A021498_01 | 0.515     | 0.197  | -0.468    | -0.422    | -0.128    | -0.083    | -0.206    | -0.192 |
| A021500_01 | -0.958    | -0.988 | -0.764    | -0.642    | -1.004    | -0.909    | -0.628    | -0.591 |
| A021510_01 | -1.093    | -1.112 | -0.92     | -0.644    | -1.603    | -1.151    | -0.812    | -0.668 |
| A021511_01 | 0.015     | 0.075  | -0.053    | -0.117    | -0.095    | 0.09      | 0.083     | 0.091  |
| A021517_01 | -0.942    | -0.792 | -0.275    | -0.296    | -0.877    | -0.761    | -0.431    | -0.57  |
| A021520_01 | 0.661     | 0.457  | 0.073     | 0.097     | 0.741     | 0.636     | 0.596     | 0.573  |
| A021521_01 | NA        | NA     | 0.017     | 0.12 NA   | NA        |           | -1.146    | -1.034 |
| A021526_01 | -0.081    | -0.111 | -0.371    | -0.282    | 0.27      | 0.128     | -0.105    | 0.016  |
| A021528_01 | NA        | -0.003 | 0.248     | 0.099 NA  | NA        |           | -0.323    | -0.349 |
| A021529_01 | 0.487     | 0.13   | 0.431     | 0.24      | 0.424     | 0.423     | 0.225     | 0.086  |
| A021538_01 | 0.884     | 0.831  | -0.152    | -0.231    | 0.496     | 0.584     | 0.387     | 0.682  |
| A021539_01 | 0.135     | -0.46  | -0.389    | -0.531    | -0.648    | -0.728    | -0.521    | -0.636 |
| A021542_01 | 0.217     | -0.066 | -0.1 NA   |           | -0.462    | -0.438 NA | NA        |        |
| A021546_01 | 0.417     | 0.792  | 0.257     | 0.245     | 0.633     | 0.921     | 0.325     | 0.491  |
| A021549_01 | -0.129    | -0.398 | -0.436    | -0.351    | -0.093    | -0.13     | -0.187    | -0.13  |
| A021551_01 | 0.348     | -0.171 | -0.361    | -0.218 NA |           | -0.776    | -0.734    | -0.476 |
| A021552_01 | -0.696    | -0.371 | 0.276     | 0.366     | -0.234    | -0.036    | 0.044     | 0.116  |
| A021557_01 | 0.731     | 0.37   | 0.115     | 0.04      | 0.609     | 0.678     | 1.041     | 1.219  |
| A021560_01 | NA        | NA     | -0.181 NA | NA        | NA        |           | -0.078 NA |        |
| A021562_01 | -0.06     | 0.242  | 0.718     | 0.616     | 0.918     | 0.677     | 0.307     | 0.213  |
| A021563_01 | 0.13      | -0.137 | -0.376    | -0.252    | -0.248    | -0.195    | -0.323    | -0.2   |
| A021565_01 | -0.714    | -0.809 | -0.863    | -0.739    | -0.519    | -0.567    | -0.849    | -0.725 |
| A021567_01 | 0.52      | 0.307  | 0.392     | 0.075     | 0.617     | 0.397     | 0.402     | 0.172  |
| A021568_01 | -0.089    | -0.051 | 0.104     | 0.058     | 0.41      | 0.167     | 0.155     | 0.133  |
| A021577_01 | -0.547    | -0.996 | -0.622    | -0.652    | -0.983    | -0.974    | -0.633    | -0.745 |
| A021580_01 | 0.029     | 0      | 0.146     | 0.119     | -0.038    | -0.107    | -0.004    | -0.16  |
| A021585_01 | -0.183    | -0.517 | -0.542    | -0.587    | -0.595    | -0.969    | -0.731    | -0.969 |
| A021587_01 | 0.098     | 0.047  | 0.021     | -0.051    | -0.256    | -0.316    | 0         | -0.192 |
| A021589_01 | 0.224     | -0.147 | 0.526     | 0.188     | 0.544     | 0.37      | 0.492     | 0.211  |
| A021592_01 | 1.308     | 0.702  | 0.147     | 0.134 NA  |           | 0.476     | 0.164     | 0.062  |
| A021593_01 | NA        | -0.706 | -0.263    | -0.172 NA | NA        |           | -1.216    | -0.99  |
| A021594_01 | 0.589     | 0.68   | 0.44      | 0.405     | 0.439     | 0.679     | 0.31      | 0.537  |
| A021595_01 | 1.504     | 0.803  | 0.752     | 0.641     | 1.308     | 1.051     | 0.677     | 0.844  |
| A021601_01 | -0.727    | -0.923 | -0.702    | -0.692    | -1.151    | -1.001    | -0.673 NA |        |
| A021607_01 | 0.633     | 0.375  | 0.089     | 0.027     | 0.724     | 0.632     | 0.514     | 0.592  |
| A021613_01 | -0.161    | -0.656 | -0.938    | -0.723    | -0.831    | -1.132    | -0.723    | -0.749 |
| A021615_01 | -0.054    | -0.162 | 0.168     | 0.149     | -0.196    | -0.335    | -0.051    | -0.08  |
| A021616_01 | 1.127     | 0.53   | 0.143 NA  | NA        |           | 0.052 NA  | NA        |        |
| A021619_01 | 0.942     | 0.584  | -0.27 NA  |           | 0.236     | 0.08      | -0.086    | -0.003 |
| A021628_01 | -0.587    | -0.544 | -1.047    | -0.9      | 0.208     | 0.426     | 0.22      | 0.38   |
| A021629_01 | -0.258    | -0.216 | -0.06     | -0.077    | 0.576     | 0.721     | 0.42      | 0.496  |
| A021635_01 | 0.564     | 0.523  | 0.033     | 0.005     | 0.47      | 0.554     | 0.111     | 0.194  |
| A021636_01 | 0.935     | 0.382  | 0.267     | 0.085     | 0.356     | 0.095     | 0.153     | 0.017  |
| A021638_01 | 0.049     | 0.2    | -0.151    | -0.017    | 0.091     | 0.136     | -0.258    | -0.067 |
| A021640_01 | -0.282    | 0.043  | -0.211    | -0.114    | -0.541    | -0.202    | -0.272    | -0.102 |
| A021641_01 | 0.761     | 0.183  | 0.114     | 0.123     | 0.213     | 0.082     | -0.297    | -0.16  |
| A021643_01 | 0.469     | 0.578  | -0.344    | -0.222    | 0.047     | 0.475     | 0.044     | 0.56   |
| A021647_01 | -0.633    | -0.918 | -0.668    | -0.424    | -0.736    | -0.711    | -0.713    | -0.485 |
| A021648_01 | -0.837    | -0.698 | 0.202     | -0.042    | -0.616    | -0.602    | -0.234    | -0.579 |
| A021652_01 | -0.156    | -0.032 | -0.091    | -0.142    | 0.059     | 0.048     | 0.117     | -0.031 |
| A021659_01 | 1.169     | 0.754  | 0.306 NA  |           | 0.801     | 0.734     | 0.426     | 0.6    |
| A021661_01 | 0.986 NA  |        | 0.183 NA  |           | 0.13 NA   |           | 0.019 NA  |        |
| A021662_01 | 0.29 NA   | NA     | NA        | NA        |           | -0.164 NA | NA        |        |
| A021670_01 | 0.296     | 0.351  | 0.727     | 0.501     | 1.031     | 0.654     | 0.351     | 0.207  |

|            |    |        |        |        |        |        |        |        |        |
|------------|----|--------|--------|--------|--------|--------|--------|--------|--------|
| A021673_01 | NA | NA     |        | 0.309  | 0.007  | 0.539  | NA     | 0.205  | 0.01   |
| A021677_01 |    | 0.188  | -0.023 | -0.184 | -0.199 | -0.077 | -0.192 | -0.005 | -0.111 |
| A021682_01 |    | -0.151 | -0.248 | 0.008  | -0.142 | -0.26  | -0.398 | -0.175 | -0.364 |
| A021691_01 |    | 0.087  | -0.131 | 0.282  | 0.234  | 0.266  | 0.364  | 0.03   | 0.195  |
| A021696_01 |    | -0.611 | -0.592 | -0.742 | -0.577 | -0.623 | -0.615 | -0.854 | -0.779 |
| A021697_01 |    | 0.318  | 0.121  | -0.172 | -0.229 | -0.073 | -0.081 | -0.008 | -0.167 |
| A021700_01 |    | 0.165  | 0.111  | -0.681 | -0.454 | 0.014  | 0.062  | -0.474 | -0.196 |
| A021701_01 |    | -0.802 | -1.105 | -0.86  | -0.644 | -1.224 | -0.951 | -0.736 | -0.774 |
| A021703_01 |    | 0.296  | -0.296 | -0.046 | -0.127 | -0.252 | -0.237 | -0.321 | -0.404 |
| A021708_01 | NA |        | 0.461  | 0.341  | 0.361  | NA     | 0.333  | -0.176 | -0.209 |
| A021709_01 | NA |        | 0.895  | 0.112  | NA     |        | 1.386  | 1.214  | 0.844  |
| A021712_01 |    | -0.872 | -0.842 | -0.859 | -0.649 | -1.411 | -1.31  | -0.854 | -0.819 |
| A021718_01 | NA | NA     |        | -1.794 | -1.88  | NA     | NA     | NA     | NA     |
| A021719_01 |    | 0.443  | 0.442  | 0.556  | 0.395  | 0.593  | 0.648  | 0.198  | 0.351  |
| A021724_01 |    | -0.107 | 0.328  | 0.088  | 0.032  | -0.12  | 0.593  | 0.365  | 0.377  |
| A021726_01 |    | -0.12  | -0.353 | -0.492 | -0.482 | -0.891 | -1.116 | -0.965 | -0.886 |
| A021730_01 |    | -0.787 | -0.976 | -1.164 | -1.033 | -0.805 | -0.967 | -0.759 | -0.605 |
| A021739_01 |    | 0.418  | -0.428 | -0.731 | -0.795 | NA     | -0.582 | -0.464 | -0.589 |
| A021749_01 |    | -0.118 | -0.588 | -1.835 | -1.812 | NA     | -1.598 | -1.847 | NA     |
| A021753_01 | NA | NA     |        | -0.112 | -0.147 | NA     |        | -0.074 | 0.05   |
| A021759_01 |    | -1.361 | -1.166 | -0.154 | -0.159 | 0.735  | 0.756  | 0.589  | 0.709  |
| A021760_01 |    | -0.755 | -0.637 | -0.699 | -0.383 | -0.126 | 0.553  | 0.289  | 0.451  |
| A021765_01 | NA | NA     |        | 0.289  | 0.054  | NA     |        | -0.24  | -0.25  |
| A021769_01 | NA | NA     |        | 0.492  | 0.336  | NA     |        | 0.014  | 0.036  |
| A021771_01 |    | -1.023 | -0.724 | -0.98  | -0.736 | -0.948 | -0.673 | -0.737 | -0.514 |
| A021772_01 |    | 0.678  | 0.6    | -0.155 | 0.007  | 0.165  | 0.231  | 0.154  | 0.277  |
| A021782_01 |    | -0.776 | -0.955 | -0.7   | -0.375 | -1.201 | -0.867 | -0.762 | -0.746 |
| A021785_01 |    | -0.506 | -0.614 | -0.361 | -0.325 | -0.591 | -0.494 | -0.192 | -0.419 |
| A021786_01 |    | 0.422  | 0.156  | -0.165 | -0.263 | 0.092  | 0.092  | -0.058 | -0.024 |
| A021791_01 |    | 0.13   | 0.019  | 0.123  | -0.031 | 0.19   | 0.139  | 0.19   | 0.025  |
| A021794_01 | NA |        | -0.288 | -0.373 | -0.356 | NA     | -0.949 | -0.963 | -0.936 |
| A021796_01 |    | -1.439 | -1.31  | -0.026 | -0.118 | -0.919 | -0.25  | 0.024  | -0.159 |
| A021797_01 |    | 0.419  | 0.198  | -0.127 | -0.216 | 0.463  | 0.152  | 0.242  | 0.029  |
| A021799_01 |    | 0.248  | -0.009 | 0.038  | -0.097 | -0.085 | -0.244 | -0.101 | -0.326 |
| A021802_01 |    | -1.378 | -1.372 | -0.851 | -0.699 | -1.299 | -1.167 | -0.74  | -0.935 |
| A021803_01 |    | -0.889 | -0.54  | -0.643 | -0.4   | -0.843 | -0.245 | -0.528 | -0.386 |
| A021804_01 |    | 0.244  | 0.401  | -0.312 | -0.301 | 0.018  | 0.179  | 0.2    | 0.226  |
| A021805_01 |    | 0.678  | 0.634  | -0.1   | -0.035 | 0.292  | 0.514  | 0.559  | 0.84   |
| A021807_01 |    | 0.218  | 0.327  | -0.891 | -0.896 | -0.178 | -0.029 | -0.103 | 0.124  |
| A021810_01 |    | 0.284  | 0.175  | -0.526 | -0.448 | 0.226  | 0.342  | 0.346  | 0.43   |
| A021811_01 |    | 0.569  | 0.748  | 0.3    | 0.536  | 1.052  | 1.452  | 0.445  | 0.842  |
| A021812_01 | NA | NA     |        | -1.057 | -1.076 | NA     |        | -0.596 | NA     |
| A021813_01 |    | 0.775  | 0.685  | -0.508 | -0.476 | 0.169  | 0.61   | 0.743  | 0.85   |
| A021814_01 |    | 0.851  | 0.579  | -0.208 | -0.114 | 0.771  | 0.698  | 0.477  | 0.536  |
| A021815_01 |    | 0.23   | 0.205  | -0.712 | -0.498 | 0.353  | 0.509  | 0.273  | 0.628  |
| A021816_01 | NA |        | 0.176  | 0.007  | -0.388 | NA     |        | 0.005  | NA     |
| A021817_01 |    | -0.722 | -0.684 | -0.027 | -0.012 | -0.736 | -0.597 | -0.433 | -0.58  |
| A021818_01 |    | -0.098 | 0.066  | -0.389 | -0.236 | -0.293 | 0.052  | -0.061 | 0.143  |
| A021820_01 |    | 0.812  | 0.678  | 0.647  | 0.505  | 1.035  | 0.978  | 0.49   | 0.503  |
| A021821_01 |    | 0.118  | 0.279  | -0.137 | -0.039 | -0.242 | 0.323  | 0.015  | 0.302  |
| A021822_01 |    | 0.342  | 0.497  | -0.37  | -0.211 | 0.012  | 0.198  | 0.047  | 0.412  |
| A021823_01 |    | 0.667  | -0.069 | -0.032 | -0.196 | 0.26   | -0.281 | -0.049 | -0.237 |
| A021827_01 |    | 0.371  | 0.345  | 0.132  | 0.099  | 0.287  | 0.207  | -0.015 | 0.046  |
| A021828_01 | NA | NA     |        | 0.291  | 0.308  | NA     | NA     |        | 0.268  |
| A021829_01 |    | -0.327 | -0.198 | -0.47  | -0.213 | -0.456 | -0.187 | -0.048 | -0.248 |
| A021830_01 |    | 1.068  | 0.634  | -0.174 | NA     | 0.564  | 0.48   | NA     | 0.428  |
| A021832_01 | NA | NA     |        | 0.239  | 0.056  | NA     |        | -0.113 | -0.23  |
| A021833_01 |    | 0.232  | 0.372  | 0.171  | -0.198 | 0.349  | 0.498  | 0.832  | 0.298  |
| A021835_01 |    | 0.677  | 0.517  | 0.61   | 0.619  | 0.288  | 0.171  | -0.046 | 0.038  |
| A021838_01 |    | -0.186 | -0.289 | -0.968 | -0.585 | -0.412 | -0.068 | -0.334 | 0.272  |
| A021839_01 | NA |        | 0.66   | -0.023 | -0.149 | NA     |        | -0.165 | -0.125 |
| A021840_01 |    | 0.341  | 0.168  | 0.067  | NA     | 0.17   | 0.149  | 0.365  | NA     |
| A021842_01 |    | 0.664  | 0.504  | -0.108 | -0.12  | -0.019 | -0.036 | -0.2   | -0.068 |
| A021843_01 |    | 0.062  | 0.117  | 0.121  | 0.146  | 0.485  | 0.659  | 0.529  | 0.614  |
| A021845_01 |    | 0.183  | 0.238  | -0.405 | -0.271 | 0.287  | 0.229  | 0.086  | 0.213  |
| A021846_01 |    | -0.755 | -0.482 | 0.182  | -0.094 | -0.256 | -0.294 | 0.145  | -0.285 |
| A021848_01 | NA | NA     |        | 0.34   | 0.143  | NA     |        | 0.11   | -0.021 |
| A021850_01 |    | 0.432  | 0.578  | -0.326 | -0.143 | 1.031  | 1.222  | 0.446  | 1.071  |

|            |    |           |        |          |           |          |           |           |        |
|------------|----|-----------|--------|----------|-----------|----------|-----------|-----------|--------|
| A021851_01 |    | 0.376     | 0.641  | 0.017    | 0.001     | 0.091    | 0.061     | 0.136     | 0.155  |
| A021853_01 |    | 0.169     | 0.173  | -0.514   | -0.297    | 0.048    | 0.29      | -0.019    | 0.319  |
| A021856_01 |    | -0.59     | -0.97  | -0.675   | -0.687    | -0.6     | -0.625    | -0.577    | -0.863 |
| A021857_01 |    | -1.219    | -1.113 | -0.977   | -0.839    | -1.241   | -1.012    | -0.828    | -0.874 |
| A021858_01 |    | 0.151     | -0.132 | -0.275   | -0.128    | -0.019   | 0.008     | -0.259    | 0.057  |
| A021859_01 |    | -0.356    | -0.695 | -1.203   | -0.976    | -1.104   | -0.827    | -0.449    | -0.778 |
| A021860_01 |    | 0.541     | 0.271  | 0.115    | 0.328     | 0.079    | 0.226     | 0.053     | 0.255  |
| A021864_01 |    | 0.109     | -0.068 | -0.091   | -0.079    | -0.282   | -0.402    | -0.52     | -0.412 |
| A021865_01 |    | 0.18      | 0.163  | -0.269   | -0.155    | -0.175   | 0.174     | 0.023     | 0.365  |
| A021866_01 |    | 0.018     | -0.028 | -0.208   | 0.033     | -0.129   | 0.025     | -0.068    | 0.13   |
| A021867_01 |    | 0.655     | 0.467  | -0.111   | -0.161    | 0.294    | 0.101     | 0.292     | 0.395  |
| A021868_01 |    | 0.042     | 0.099  | -0.303   | -0.114    | -0.024   | 0.201 NA  |           | -0.476 |
| A021870_01 |    | 0.441     | 0.195  | -0.3     | -0.182    | -0.126   | -0.042    | -0.106    | 0.162  |
| A021873_01 |    | 0.317     | 0.422  | 0.345    | 0.428     | 0.57     | 0.779     | 0.409     | 0.623  |
| A021874_01 |    | 0.499     | 0.757  | 0.065    | 0.268     | 0.695    | 1.037     | 0.32      | 0.946  |
| A021876_01 |    | 0.094     | -0.151 | 0.157    | 0.021     | 0.208    | 0.135 NA  |           | 0.489  |
| A021878_01 |    | 0.803     | 0.555  | -0.038   | 0.097     | 0.183    | 0.302     | 0.137     | 0.342  |
| A021882_01 |    | -0.336    | -0.581 | -1.56    | -1.301    | -0.614   | -0.455    | -0.35     | -0.07  |
| A021884_01 |    | -1.484    | -1.158 | -0.877   | -0.592    | -0.986   | -0.882    | -0.905    | -0.809 |
| A021885_01 |    | -0.654    | -0.45  | -0.031   | -0.255    | -0.377   | -0.24     | -0.016    | -0.286 |
| A021888_01 | NA |           | -0.114 | -0.003   | -0.023 NA | NA       |           | -0.5      | -0.476 |
| A021889_01 |    | -0.894    | -0.954 | -0.641   | -0.457    | -0.903   | -0.726    | -0.718    | -0.653 |
| A021890_01 |    | -0.557    | -0.197 | 0.373    | 0.434     | -0.173   | -0.101    | -0.142    | -0.069 |
| A021891_01 |    | -0.868    | -0.684 | -0.645   | -0.471    | -0.717   | -0.444    | -0.543    | -0.431 |
| A021893_01 |    | 0.699     | 0.538  | 0.549    | 0.361     | 1.579    | 1.047     | 1.172     | 1.2    |
| A021894_01 |    | 0.512     | 0.674  | -0.603   | -0.352    | 0.047    | 1.004     | 0.566     | 1.099  |
| A021895_01 |    | -1.01     | -0.291 | -0.299   | -0.125    | -0.217   | 0.174     | -0.317    | 0.072  |
| A021897_01 |    | -0.183    | -0.018 | -0.386   | -0.389    | -0.218   | -0.114    | -0.172    | -0.229 |
| A021898_01 |    | -0.277    | -0.223 | -0.539   | -0.484    | 0.321    | 0.261     | 0.195     | 0.318  |
| A021899_01 | NA | NA        |        | 0.397    | -0.248    | 0.034 NA |           | 0.306 NA  |        |
| A021900_01 |    | -0.398    | -0.335 | 0.073    | -0.136    | -0.105   | -0.251    | -0.174    | -0.166 |
| A021901_01 |    | -0.51     | -0.219 | -1.428   | -1.032    | -0.748   | -0.597    | -0.087    | 0.208  |
| A021903_01 |    | -0.425 NA |        | -0.592   | -0.866    | -0.659   | -0.62     | -0.369    | -0.828 |
| A021905_01 |    | -0.976    | -0.819 | -0.59    | -0.306    | -1.225   | -0.674    | -0.547    | -0.568 |
| A021906_01 |    | 0.954     | 0.627  | 0.069    | -0.009    | 0.328    | 0.278     | 0.468     | 0.55   |
| A021907_01 |    | 0.279     | 0.486  | -0.084   | 0.056     | 0.129    | 0.434     | 0.072     | 0.271  |
| A021908_01 |    | -1.094    | -1.117 | -0.502   | -0.402 NA |          | -1.065    | -0.274    | -0.532 |
| A021909_01 |    | -1.291    | -1.066 | -0.344   | -0.39     | -0.931   | -0.836    | -0.732    | -1.02  |
| A021913_01 |    | 0.974     | 0.902  | 0.376    | 0.427     | 0.617    | 1.028     | 0.699     | 0.947  |
| A021915_01 |    | 0.773 NA  |        | 0.45     | 0.028     | 0.346    | -0.051    | 0.336     | -0.016 |
| A021916_01 |    | 0.151     | 0.242  | -0.266   | -0.297    | 0.375    | 0.501     | 0.374     | 0.382  |
| A021920_01 |    | 1.102     | 0.728  | 0.208    | -0.006    | 0.536 NA |           | 0.354     | 0.486  |
| A021921_01 |    | 0.788     | 0.583  | 0.636    | 0.525     | 0.63     | 0.536     | 0.502     | 0.561  |
| A021922_01 |    | 0.254     | 0.472  | 0.267    | 0.125     | 0.765    | 0.763     | 0.51      | 0.618  |
| A021924_01 |    | 0.616     | 0.699  | -0.171   | -0.01     | -0.333   | 0.28      | -0.051    | 0.44   |
| A021926_01 |    | 0.358     | 0.359  | -0.383   | -0.213    | 0.304    | 0.474     | 0.323     | 0.731  |
| A021927_01 |    | 0.479     | 0.372  | -0.094   | -0.1      | 0.434    | 0.514     | 0.368     | 0.723  |
| A021928_01 |    | 0.881     | 0.631  | -0.15    | -0.202    | 0.102    | 0.223     | -0.211    | -0.061 |
| A021929_01 |    | 0.032     | -0.081 | -0.33    | -0.231    | 0.204    | 0.538     | 0.226     | 0.489  |
| A021930_01 |    | -1.072    | -0.899 | -0.749   | -0.673    | -1.034   | -0.795    | -0.507    | -0.681 |
| A021931_01 |    | -0.977    | -1.104 | -0.494   | -0.379    | -1.075   | -0.992    | -0.759    | -0.863 |
| A021932_01 |    | -0.476    | -0.837 | -0.933   | -0.68     | -0.628   | -0.554    | -0.505    | -0.414 |
| A021933_01 |    | -0.68     | -0.538 | -0.571   | -0.535    | -0.616   | -0.587    | -0.367    | -0.57  |
| A021934_01 |    | -0.32     | -0.201 | -1.394   | -1.118    | -0.542   | -0.549    | 0.079     | 0.192  |
| A021935_01 |    | 0.078 NA  |        | 0.21     | 0.003     | 0.16 NA  |           | -0.219    | -0.239 |
| A021937_01 |    | -0.628    | -0.764 | -1.835   | -1.538    | -0.388   | -0.333    | -1.031    | -1.244 |
| A021938_01 |    | -0.474    | -0.689 | -1.034   | -0.675    | -0.832   | -0.71     | -0.755    | -0.496 |
| A021939_01 |    | -0.21     | -0.814 | -0.407   | -0.421    | -0.503   | -0.651    | -0.446    | -0.505 |
| A021941_01 |    | -1.184    | -1.787 | -2.013   | -1.776    | -1.922   | -1.812    | -1.591    | -1.615 |
| A021942_01 |    | -0.053    | 0.2    | 0.798    | 0.769     | 1.023    | 0.695     | 0.346     | 0.234  |
| A021946_01 |    | 0.458     | 0.109  | 0.246    | -0.054    | 0.096 NA |           | -0.089 NA |        |
| A021948_01 |    | 0.177     | 0.081  | -0.668   | -0.517    | 0.246    | 0.111     | 0.473     | 0.374  |
| A021949_01 |    | -0.222    | -0.243 | -0.91 NA |           | -0.526   | -0.459 NA |           | 0.204  |
| A021950_01 |    | -0.924    | -0.965 | -0.841   | -0.602    | -0.865   | -0.712    | -0.528    | -0.463 |
| A021951_01 |    | 0.311     | -0.079 | -0.014   | -0.028    | -0.238   | -0.457    | -0.175    | -0.152 |
| A021954_01 | NA |           | -0.29  | 0.019    | -0.152    | 0.824    | 0.024     | -0.418    | -0.738 |
| A021955_01 |    | -0.054    | -0.32  | -0.457   | -0.328    | -0.58    | -0.594    | -0.228    | -0.25  |
| A021956_01 |    | -0.35     | 0.023  | -0.022   | 0.027     | 0.13     | 0.336     | -0.083    | 0.099  |

|            |          |        |           |           |        |           |          |        |
|------------|----------|--------|-----------|-----------|--------|-----------|----------|--------|
| A021958_01 | -0.719   | -0.162 | -0.208    | -0.019    | 0.15   | 0.264     | -0.186   | -0.047 |
| A021959_01 | 2.149    | 1.707  | -1.954    | -1.713    | 0.221  | 0.203     | 2.039    | 2.371  |
| A021961_01 | -0.914   | -0.859 | -0.898    | -0.739    | -1.197 | -0.682    | -0.608   | -0.592 |
| A021962_01 | -0.957   | -0.325 | -0.001    | 0.182     | -0.195 | 0.149     | -0.185   | 0.077  |
| A021963_01 | 0.462    | 0.255  | 0.042     | -0.151    | 0.329  | 0.312     | 0.224    | 0.015  |
| A021966_01 | -0.354   | -0.444 | -1.029    | -0.977    | -0.886 | -0.767    | -0.311   | -0.347 |
| A021968_01 | -0.384   | -0.005 | -0.52     | -0.078    | -0.403 | 0.321     | -0.676   | -0.236 |
| A021969_01 | 0.3      | 0.08   | -0.172    | -0.164    | -0.365 | -0.14     | -0.17    | -0.01  |
| A021970_01 | 0.111    | 0.179  | -0.033    | -0.206    | 0.221  | 0.107     | 0.238    | -0.056 |
| A021971_01 | -0.934   | -0.94  | -0.25     | -0.276    | -0.8   | -0.774    | -0.386   | -0.569 |
| A021976_01 | 1.959    | 1.839  | -0.014    | 0.003     | -1.403 | -1.201    | 1.234    | 1.455  |
| A021978_01 | -0.311   | -0.391 | -1.17     | -0.883    | -1.094 | -0.74     | -1.132   | -1.071 |
| A021979_01 | 1.332    | 1.354  | -1.213    | -0.977    | -0.305 | -0.388    | 1.388    | 1.116  |
| A021980_01 | 0.622    | 0.115  | -0.709 NA |           | 0.65   | 0.711     | 0.502    | 0.678  |
| A021981_01 | 0.474    | 0.133  | -0.202    | -0.31     | 0.361  | 0.847     | 0.254    | 0.488  |
| A021982_01 | NA       | -1.777 | -0.757    | -0.655    | -0.957 | -1.39     | -1.002   | -1.277 |
| A021983_01 | 0.737    | 0.376  | -0.33     | -0.504    | -0.223 | -0.201    | -0.154   | -0.483 |
| A021984_01 | -0.263   | -0.29  | -0.151    | 0.002     | -0.176 | -0.352    | -0.445   | -0.428 |
| A021986_01 | -0.925   | -1.056 | -0.304    | -0.49     | -0.363 | -0.481    | -0.078   | -0.369 |
| A021988_01 | 0.347    | 0.461  | 0.12      | 0.068     | -0.249 | -0.031    | -0.116   | -0.032 |
| A021989_01 | 0.428    | 0.092  | 0.209     | 0.128     | 0.147  | -0.185    | -0.036   | -0.042 |
| A021990_01 | 0.924 NA |        | 0.31      | 0.423 NA  | NA     |           | 0.334 NA |        |
| A021992_01 | -1.401   | -1.467 | -0.698    | -0.637    | -1.075 | -0.992    | -0.645   | -0.772 |
| A021993_01 | 0.318    | 0.414  | 0.041     | 0.168     | 0.534  | 0.862     | 0.479    | 0.833  |
| A021994_01 | -0.455   | -0.585 | -0.377    | -0.381    | -0.845 | -0.342    | -0.164   | -0.172 |
| A021995_01 | -0.039   | -0.123 | -0.446    | -0.499    | 0.052  | -0.063    | -0.223   | -0.322 |
| A021997_01 | -2.418   | -1.911 | -1.083    | -0.761    | -1.838 | -1.448    | -1.341   | -1.194 |
| A021998_01 | -1.581   | -1.87  | -1.847    | -1.442    | -2.629 | -1.669    | -1.512   | -1.726 |
| A021999_01 | 0.126    | -0.004 | -0.105 NA |           | 0.778  | 0.755     | 0.577    | 0.714  |
| A022000_01 | -1.294   | -1.917 | -1.171    | -1.517    | -1.502 | -1.354    | -0.082   | -0.123 |
| A022001_01 | 1.302    | 1.542  | 0.06      | 0.097     | -0.915 | -0.981    | 1.189    | 1.066  |
| A022003_01 | -0.057   | 0.021  | -0.098    | -0.074    | -0.077 | -0.215 NA |          | -0.04  |
| A022005_01 | 0.085    | -0.132 | 0.208     | 0.029     | 0.399  | 0.29      | 0.195    | 0.022  |
| A022006_01 | 0.116    | 0.278  | -0.073    | 0.061     | 0.196  | 0.622     | 0.693    | 0.966  |
| A022009_01 | -0.704   | -0.924 | -0.885    | -0.711    | -0.796 | -0.714    | -0.589   | -0.669 |
| A022010_01 | -1.516   | -1.302 | -0.832    | -0.598    | -1.57  | -1.003    | -0.85    | -0.795 |
| A022011_01 | -0.338   | -0.073 | -0.181    | -0.058    | 0.001  | -0.044    | -0.286   | -0.063 |
| A022013_01 | -0.466   | -0.152 | 0.271     | 0.294     | -0.181 | 0.233     | -0.281   | -0.067 |
| A022014_01 | -0.935   | -0.292 | -0.176    | -0.154    | -0.397 | -0.247    | -0.402   | -0.297 |
| A022015_01 | -0.568   | 0.304  | 0.094     | 0.093     | 0.825  | 0.674     | 0.501    | 0.602  |
| A022018_01 | -0.919   | -0.914 | -0.501    | -0.391    | -0.915 | -0.722    | -0.475   | -0.575 |
| A022019_01 | 0.041    | 0.058  | 0.043     | -0.001    | 0.293  | 0.213     | 0.283    | 0.172  |
| A022020_01 | -1.44    | -1.377 | -0.123    | 0.041     | -0.954 | -0.876    | -0.704   | -0.593 |
| A022021_01 | -1.195   | -1.177 | -1.076    | -0.678    | -1.235 | -0.927    | -0.864   | -0.558 |
| A022022_01 | -0.155   | -0.227 | -0.521    | -0.564    | -0.586 | -0.589    | -0.456   | -0.589 |
| A022024_01 | NA       | NA     | 0.361     | 0.336     | 0.164  | 0.083     | -0.11    | -0.178 |
| A022025_01 | 0.137    | 0.069  | 0.016     | 0.01      | -0.056 | -0.017    | -0.267   | -0.313 |
| A022026_01 | -1.632   | -1.411 | -0.835    | -0.666    | -1.284 | -1.094    | -0.777   | -0.785 |
| A022027_01 | -0.226   | -0.13  | -0.38     | -0.194    | -0.859 | -0.433    | -0.053   | 0.065  |
| A022029_01 | -0.511   | 0.222  | -0.029    | -0.045    | -0.113 | 0.598     | 0.789    | 0.84   |
| A022033_01 | -0.095   | -0.242 | -0.471    | -0.317    | -0.247 | -0.414    | -0.128   | -0.094 |
| A022034_01 | -0.725   | -0.234 | 0.098     | 0.113     | -0.034 | 0.203     | 0.082    | 0.25   |
| A022038_01 | -0.25    | 0.019  | -0.032    | 0.065     | -0.089 | 0.142     | -0.071   | 0.02   |
| A022039_01 | -0.976   | -0.552 | -1.404    | -1.127    | -1.411 | -1.177    | -1.203   | -1.316 |
| A022040_01 | -0.287   | -0.202 | -0.32     | -0.32     | 0.093  | 0.091     | 0.187    | 0.079  |
| A022043_01 | -1.931   | -1.44  | -0.138    | 0.01      | -1.436 | -1.143    | -1.014   | -0.81  |
| A022044_01 | -1.805   | -1.809 | -0.521    | -0.444    | -1.318 | -1.148    | -0.844   | -1.005 |
| A022045_01 | -0.055   | -0.012 | 0.16      | 0.182     | 0.253  | 0.773     | 0.818    | 0.946  |
| A022046_01 | NA       | NA     | -0.348    | -0.279 NA | NA     |           | -0.74    | -0.717 |
| A022047_01 | -0.85    | -1.059 | -0.987    | -0.759    | -1.178 | -0.962    | -0.681   | -0.809 |
| A022048_01 | NA       | 0.241  | -0.801    | -0.813 NA |        | 0.075     | -0.029   | -0.175 |
| A022077_01 | 0.834    | 0.777  | 0.146     | 0.094     | 0.739  | 1.082     | 0.636    | 0.928  |
| A022102_01 | -0.057   | 0.245  | -0.132    | -0.213    | -0.16  | -0.351    | -0.271   | -0.559 |
| A022105_01 | 0.807    | 0.724  | -0.352    | -0.223    | 0.299  | 0.479     | 0.589    | 0.988  |
| A022107_01 | -1.255   | -1.204 | -0.489    | -0.492    | -1.006 | -0.821    | -0.411   | -0.78  |
| A022112_01 | 0.444    | 0.777  | -0.076    | -0.049    | 0.169  | 0.81      | 0.76     | 1.044  |
| A022113_01 | -0.464   | -0.11  | -0.476    | -0.253    | -0.656 | -0.245    | -0.407   | -0.257 |
| A022117_01 | -0.132   | -0.014 | 0.114     | 0.018     | 0.222  | 0.194     | 0.397    | 0.166  |

|            |    |        |        |        |        |        |        |        |        |
|------------|----|--------|--------|--------|--------|--------|--------|--------|--------|
| A022118_01 |    | 0.279  | 0.368  | -0.098 | -0.033 | -0.026 | 0.307  | 0.136  | 0.374  |
| A022120_01 |    | 0.483  | 0.442  | -0.289 | -0.291 | 0.58   | 0.78   | 0.519  | 0.65   |
| A022121_01 |    | 0.399  | 0.03   | -0.674 | -0.603 | -0.232 | -0.25  | -0.336 | -0.163 |
| A022125_01 |    | 0.732  | 0.491  | 0.19   | -0.002 | 0.405  | 0.291  | 0.617  | 0.488  |
| A022126_01 |    | 0.487  | 0.24   | -0.223 | -0.247 | 0.421  | 0.497  | 0.277  | 0.124  |
| A022130_01 |    | 0.282  | 0.127  | -0.222 | -0.216 | 0.294  | 0.19   | 0.062  | 0.058  |
| A022138_01 | NA |        | -0.451 | 0.318  | 0.262  | 0.14   | 0.281  | 0.079  | 0.113  |
| A022140_01 |    | 0.481  | 0.268  | 0.025  | -0.079 | 0.101  | NA     | NA     | 0.268  |
| A022156_01 | NA |        | -0.016 | 0.236  | 0.089  | NA     | 0.297  | 0.238  | 0.391  |
| A022163_01 |    | -0.211 | -0.05  | -0.399 | -0.368 | 0.036  | 0.148  | 0.125  | 0.178  |
| A022164_01 | NA |        | -1.363 | 0.043  | -0.007 | -0.876 | NA     | NA     | -0.567 |
| A022171_01 |    | -0.046 | -0.011 | 0.039  | 0.048  | -0.188 | 0.106  | -0.022 | 0.053  |
| A022183_01 |    | -0.514 | -0.08  | 0.153  | 0.094  | 0.183  | 0.149  | 0.357  | 0.273  |
| A022196_01 |    | 0.07   | -0.151 | 0.247  | -0.074 | 0.001  | -0.148 | 0.044  | -0.377 |
| A022202_01 |    | 0.091  | -0.211 | -0.823 | -0.93  | -0.452 | -0.526 | -0.299 | -0.439 |
| A022215_01 |    | -0.098 | 0.122  | 0.229  | 0.15   | -0.021 | 0.065  | -0.03  | -0.124 |
| A022218_01 |    | 0.093  | NA     | 0.292  | 0.068  | -0.25  | NA     | -0.212 | -0.402 |
| A022230_01 |    | 0.233  | 0.087  | 0.173  | -0.128 | 0.265  | 0.108  | 0.558  | 0.192  |
| A022248_01 | NA |        | NA     | 0.203  | 0.048  | NA     | 0.019  | 0.151  | -0.028 |
| A022267_01 | NA |        | NA     | -0.209 | -0.406 | NA     |        | -0.05  | -0.535 |
| A022269_01 |    | 0.413  | 0.496  | 0.514  | 0.198  | 0.656  | 0.412  | 0.352  | 0.397  |
| A022275_01 |    | -0.837 | -0.524 | -1.163 | -1.242 | -0.874 | -0.672 | -0.633 | -0.545 |
| A022279_01 |    | -0.062 | 0.114  | 0.023  | -0.128 | 0.324  | 0.117  | 0.228  | 0.097  |
| A022282_01 |    | -0.008 | -0.335 | -0.533 | NA     | -0.675 | NA     | NA     | NA     |
| A022283_01 |    | 0.372  | 0.249  | 0.384  | 0.091  | 0.772  | 0.374  | 0.607  | 0.306  |
| A022300_01 | NA |        | NA     | 0.444  | NA     | NA     | NA     | NA     | NA     |
| A022304_01 |    | 0.679  | 0.612  | 0.227  | NA     | 0.3    | 0.088  | NA     | NA     |
| A022306_01 |    | 0.645  | 0.621  | 0.544  | 0.367  | 0.411  | 0.515  | 0.301  | 0.285  |
| A022311_01 | NA |        | NA     | 0.266  | 0.106  | NA     |        | -0.07  | -0.138 |
| A022316_01 | NA |        | NA     | -0.198 | -0.241 | 0.199  | 0.065  | -0.287 | -0.365 |
| A022324_01 |    | -0.005 | 0.267  | -0.82  | -0.942 | -0.918 | -0.577 | -0.744 | -0.893 |
| A022328_01 |    | 0.22   | 0.105  | 0.002  | 0.086  | -0.178 | -0.145 | -0.051 | -0.035 |
| A022329_01 | NA |        | NA     | 0.27   | -0.016 | NA     | 0.425  | 0.749  | 0.66   |
| A022339_01 | NA |        | NA     | 1.012  | 0.661  | NA     |        | 0.036  | -0.14  |
| A022358_01 |    | 1.072  | 0.944  | 0.576  | 0.384  | 0.777  | 0.67   | 0.581  | 0.609  |
| A022365_01 |    | 0.128  | NA     | 0.32   | 0.21   | 0.692  | 0.622  | 0.47   | 0.449  |
| A022367_01 |    | 0.566  | 0.105  | 0.088  | -0.12  | 0.268  | 0.224  | 0.186  | 0.239  |
| A022377_01 |    | 0.134  | 0.363  | 0.21   | 0.161  | 0.339  | 0.541  | 0.438  | 0.368  |
| A022381_01 |    | -0.731 | -0.77  | -0.488 | -0.551 | -0.376 | -0.427 | -0.209 | -0.432 |
| A022386_01 |    | 0.413  | 0.206  | 0.522  | 0.192  | 0.4    | 0.281  | 0.276  | 0.03   |
| A022394_01 |    | -1.218 | -1.008 | 0.02   | -0.053 | -0.599 | -0.418 | 0.167  | 0.089  |
| A022401_01 |    | 0.2    | 0.58   | 0.423  | 0.504  | -0.392 | -0.086 | -0.309 | -0.255 |
| A022405_01 |    | 0.492  | 0.404  | 0.435  | 0.293  | 0.372  | 0.22   | 0.288  | 0.213  |
| A022406_01 | NA |        | NA     | -0.003 | -0.234 | NA     | NA     | NA     | -0.367 |
| A022410_01 | NA |        | NA     | -0.3   | NA     | NA     |        | 0.318  | 0.397  |
| A022417_01 |    | -0.097 | 0.104  | -0.264 | -0.211 | -0.008 | 0.2    | -0.213 | -0.158 |
| A022434_01 | NA |        | NA     | 0.189  | 0.07   | NA     |        | -0.258 | -0.319 |
| A022436_01 |    | 0.759  | 0.776  | 0.177  | 0.063  | 0.557  | 0.626  | 0.59   | 0.592  |
| A022444_01 |    | -0.81  | NA     | 0.381  | 0.207  | 0.478  | 0.418  | 0.471  | 0.412  |
| A022447_01 |    | 0.65   | 0.492  | -0.364 | -0.242 | 0.363  | 0.232  | -0.072 | 0.075  |
| A022451_01 |    | 0.682  | 0.423  | -0.239 | NA     | -0.174 | NA     | NA     | NA     |
| A022457_01 |    | 0.172  | NA     | -0.088 | -0.268 | 0.189  | -0.298 | -0.028 | -0.281 |
| A022479_01 | NA |        | -0.289 | 0.109  | 0.035  | -0.196 | -0.344 | -0.097 | -0.184 |
| A022485_01 | NA |        | NA     | 0.24   | 0.041  | NA     | NA     | 0.421  | 0.111  |
| A022486_01 | NA |        | NA     | -0.132 | -0.334 | NA     | NA     | -0.137 | -0.486 |
| A022488_01 |    | -0.544 | -0.3   | -0.052 | -0.113 | 0.167  | -0.037 | 0.233  | 0.104  |
| A022495_01 | NA |        | NA     | 0.069  | -0.117 | NA     | NA     | NA     | NA     |
| A022502_01 |    | 0.223  | 0.233  | 0.262  | 0.042  | 0.45   | 0.562  | 0.56   | 0.518  |
| A022509_01 |    | -0.129 | -0.188 | -0.123 | -0.258 | -0.389 | -0.353 | -0.137 | -0.28  |
| A022534_01 | NA |        | -0.553 | -0.068 | -0.303 | NA     | -0.394 | -0.125 | -0.395 |
| A022541_01 |    | -0.107 | -0.138 | -0.323 | -0.347 | NA     | 0.043  | -0.37  | -0.299 |
| A022543_01 |    | 0.353  | 0.121  | 0.435  | 0.22   | 0.753  | 0.399  | 0.35   | 0.25   |
| A022546_01 |    | -0.227 | -0.731 | NA     | NA     | NA     | NA     | NA     | NA     |
| A022551_01 |    | 0.301  | 0.079  | -0.508 | -0.416 | -0.189 | -0.159 | -0.267 | -0.295 |
| A022555_01 |    | 0.146  | 0.07   | 0.362  | 0.124  | 0.272  | 0.181  | 0.192  | -0.043 |
| A022556_01 |    | 0.641  | 0.586  | -0.228 | -0.321 | 0.445  | 0.536  | 0.176  | 0.17   |
| A022560_01 |    | 0.389  | 0.136  | -0.045 | -0.188 | 0.227  | -0.081 | 0.397  | 0.341  |
| A022565_01 |    | 0.644  | 0.443  | -0.046 | -0.127 | 0.289  | -0.104 | 0.037  | -0.112 |

|            |    |        |        |        |        |    |        |        |        |        |    |
|------------|----|--------|--------|--------|--------|----|--------|--------|--------|--------|----|
| A022569_01 | NA | NA     |        | -0.239 | -0.359 | NA | NA     |        | -0.397 | -0.35  |    |
| A022570_01 |    | 1.29   | 1.097  | -0.467 | -0.394 |    | 0.156  | 0.329  | -0.199 | 0.141  |    |
| A022571_01 |    | 0.792  | 0.325  | -0.043 | -0.036 |    | 0.53   | 0.026  | 0.051  | -0.107 |    |
| A022583_01 |    | 0.025  | 0.051  | -0.604 | -0.53  |    | -0.301 | 0.046  | 0.081  | 0.36   |    |
| A022592_01 |    | 0.296  | 0.096  | 0.283  | 0.143  |    | 0.329  | 0.264  | 0.142  | 0.242  |    |
| A022599_01 |    | 0.102  | 0.1    | 0.349  | 0.195  |    | 0.838  | 0.541  | 0.797  | 0.884  |    |
| A022600_01 |    | 0.111  | 0.052  | -0.096 | -0.004 |    | 0.053  | 0.01   | 0.161  | 0.308  |    |
| A022619_01 |    | 1.379  | 0.95   | -0.554 | NA     |    | 0.779  | 0.563  | 0.455  | 0.735  |    |
| A022624_01 |    | 0.895  | 0.792  | 0.35   | NA     |    | 0.51   | 0.474  | 0.734  | 0.675  |    |
| A022627_01 |    | -0.538 | -0.347 | 0.061  | 0.089  |    | 0.333  | 0.018  | 0.141  | 0.197  |    |
| A022634_01 |    | 0.113  | 0.129  | 0.423  | 0.06   |    | 0.374  | 0.215  | 0.319  | 0.244  |    |
| A022635_01 |    | -0.074 | -0.206 | -0.851 | -0.925 |    | -0.674 | -0.582 | -0.516 | -0.591 |    |
| A022637_01 |    | -0.289 | 0.199  | 0.625  | 0.35   |    | 0.449  | 0.394  | 0.382  | 0.221  |    |
| A022643_01 |    | 0.799  | 0.628  | 0.413  | 0.126  |    | 0.442  | 0.143  | 0.521  | 0.196  |    |
| A022657_01 |    | 0.862  | 0.726  | 0.246  | 0.174  |    | 0.596  | 0.542  | 0.742  | 0.864  |    |
| A022664_01 |    | -0.041 | NA     | 0.253  | NA     |    | 0.343  | NA     | 0.292  | NA     |    |
| A022666_01 |    | -0.404 | NA     | 0.426  | 0.316  |    | 0.465  | 0.346  | 0.079  | -0.051 |    |
| A022671_01 |    | 0.41   | 0.135  | 0.313  | -0.15  |    | 0.4    | 0.27   | 0.378  | 0.056  |    |
| A022689_01 |    | -1.004 | -0.573 | -1.468 | -1.22  |    | -0.656 | -0.704 | -0.864 | -1.024 |    |
| A022702_01 |    | 0.387  | 0.104  | -0.85  | -0.859 |    | -0.446 | -0.539 | -0.243 | -0.504 |    |
| A022705_01 | NA | NA     |        | -0.009 | -0.301 | NA | NA     |        | -0.249 | -0.573 |    |
| A022708_01 | NA | NA     |        | 0.289  | 0.009  |    | 0.475  | 0.347  | 0.19   | -0.028 |    |
| A022729_01 |    | 1.115  | 0.824  | 0.612  | 0.44   |    | 1.397  | 1.074  | 0.259  | 0.186  |    |
| A022731_01 |    | -0.203 | NA     | -0.409 | NA     |    | NA     | NA     | NA     | NA     |    |
| A022735_01 |    | 0.941  | 0.656  | -0.691 | -0.808 |    | 0.53   | 0.6    | -0.03  | 0.119  |    |
| A022749_01 | NA | NA     |        | 0.088  | -0.175 |    | -0.078 | -0.677 | 0.167  | -0.254 |    |
| A022755_01 |    | -1.03  | -0.686 | 0.093  | 0.081  |    | -0.25  | -0.161 | -0.393 | -0.303 |    |
| A022764_01 |    | 1.022  | NA     | 0.526  | 0.155  |    | 0.62   | 0.307  | 0.152  | -0.026 |    |
| A022765_01 |    | 0.561  | 0.417  | 0.242  | -0.023 |    | 0.424  | 0.322  | 0.649  | 0.414  |    |
| A022779_01 |    | 0.123  | -0.151 | -0.381 | -0.326 |    | -0.547 | -0.811 | -0.534 | -0.674 |    |
| A022781_01 |    | -0.461 | -0.284 | 0.189  | 0.141  |    | 0.384  | 0.217  | 0.532  | 0.502  |    |
| A022790_01 |    | -0.429 | -0.261 | -0.956 | -0.958 |    | -0.786 | -0.781 | 0.014  | -0.152 |    |
| A022796_01 |    | 0.714  | 0.42   | 0.201  | 0.068  |    | 0.57   | 0.451  | 0.4    | 0.28   |    |
| A022801_01 |    | 0.513  | 0.2    | 0.1    | -0.237 |    | 0.381  | 0.241  | 0.413  | 0.153  |    |
| A022804_01 |    | 0.35   | 0.194  | 0.379  | 0.131  |    | 0.557  | 0.561  | 0.977  | 0.767  |    |
| A022808_01 |    | 0.203  | NA     | 0.635  | 0.378  |    | 0.526  | NA     | 0.446  | 0.202  |    |
| A022817_01 |    | -0.307 | -0.131 | 0.027  | NA     |    | 0.43   | 0.177  | 0.12   | 0.232  |    |
| A022821_01 |    | -1.802 | NA     | NA     |        |    | -2.414 | NA     | -1.884 | -1.826 | NA |
| A022839_01 |    | -0.38  | NA     | -0.013 | -0.197 |    | -0.139 | -0.297 | -0.243 | -0.363 |    |
| A022844_01 |    | -1.106 | -1.452 | -0.39  | -0.547 |    | -1.137 | -0.998 | -0.53  | -0.832 |    |
| A022850_01 |    | -0.479 | -0.282 | NA     | NA     |    | -1.55  | -1.121 | NA     | NA     |    |
| A022862_01 | NA | NA     |        | -0.665 | -0.612 |    | -0.541 | -0.589 | -0.367 | -0.307 |    |
| A022865_01 |    | -0.383 | -0.407 | -0.114 | NA     |    | -0.344 | -0.54  | 0.082  | NA     |    |
| A022874_01 |    | -0.623 | -0.438 | 0.111  | 0.103  |    | 0.1    | 0.167  | -0.154 | -0.216 |    |
| A022882_01 |    | -0.152 | -0.332 | -0.358 | -0.301 |    | -0.688 | -0.747 | -0.299 | -0.374 |    |
| A022901_01 |    | 0.333  | 0.159  | 0.191  | NA     |    | 0.489  | 0.407  | 0.364  | NA     |    |
| A022911_01 |    | -0.306 | -0.226 | -0.38  | -0.28  |    | -0.029 | 0.009  | -0.293 | -0.14  |    |
| A022916_01 |    | 0.439  | 0.225  | 0.397  | 0.283  |    | 0.511  | 0.241  | 0.273  | 0.318  |    |
| A022919_01 |    | -0.918 | -1.201 | -0.812 | -0.68  |    | -1.193 | -1.206 | -0.703 | -0.646 |    |
| A022922_01 |    | 0.416  | 0.014  | -0.155 | -0.276 |    | -0.216 | -0.179 | 0.054  | -0.025 |    |
| A022927_01 |    | -0.297 | 0.145  | 0.207  | 0.308  |    | 0.582  | 0.499  | 0.399  | 0.409  |    |
| A022948_01 |    | 0.655  | 0.884  | -0.489 | -0.543 |    | 0.602  | 0.898  | 0.914  | 1.17   |    |
| A022952_01 |    | 0.338  | 0.042  | -0.284 | -0.288 |    | 0.157  | -0.062 | 0.115  | -0.009 |    |
| A022967_01 |    | 0.413  | 0.036  | NA     | NA     |    | NA     | NA     | NA     | NA     |    |
| A022968_01 |    | 0.084  | -0.089 | -0.175 | -0.242 |    | -0.311 | -0.418 | 0.218  | 0.122  |    |
| A022972_01 |    | 0.706  | 0.485  | -0.019 | -0.292 |    | 0.436  | 0.366  | 0.396  | 0.471  |    |
| A022975_01 |    | 0.432  | 0.088  | 0.11   | -0.083 |    | 0.023  | 0.032  | 0.081  | -0.145 |    |
| A022983_01 |    | -0.28  | NA     | 0.409  | 0.433  |    | 0.25   | NA     | -0.003 | 0.023  |    |
| A022984_01 | NA | NA     |        | 0.242  | 0.052  |    | -0.085 | -0.312 | 0.293  | 0.006  |    |
| A022987_01 |    | 0.421  | 0.665  | 0.325  | 0.355  |    | -0.044 | 0.447  | 0.227  | 0.47   |    |
| A022990_01 |    | -0.186 | -0.825 | -1.284 | -1.036 |    | -0.815 | -1.317 | -0.703 | -0.693 |    |
| A022991_01 | NA | NA     |        | 0.227  | 0.16   | NA | NA     |        | 0.301  | 0.339  |    |
| A022993_01 |    | 0.502  | 0.479  | 0.15   | 0.057  |    | 0.274  | 0.149  | 0.049  | 0.066  |    |
| A022996_01 |    | -0.064 | NA     | -0.107 | NA     |    | 0.427  | 0.483  | 0.413  | 0.407  |    |
| A022999_01 | NA | NA     |        | -0.602 | NA     |    | NA     | -1.117 | NA     | NA     |    |
| A023023_01 |    | -0.934 | -0.468 | 0.036  | 0.074  |    | 0.452  | 0.272  | 0.053  | -0.031 |    |
| A023027_01 |    | 0.237  | 0.065  | -0.71  | -0.629 |    | 0.315  | 0.307  | 0.289  | 0.241  |    |
| A023029_01 |    | 0.773  | 0.661  | 0.024  | -0.307 |    | 0.558  | 0.498  | 0.321  | 0.029  |    |

|            |    |           |          |           |    |           |  |           |           |        |           |        |
|------------|----|-----------|----------|-----------|----|-----------|--|-----------|-----------|--------|-----------|--------|
| A023030_01 |    | 0.034 NA  |          | -0.076    |    | -0.081    |  | 0.121 NA  |           | -0.231 |           | -0.16  |
| A023035_01 |    | 0.987     | 0.447 NA |           | NA |           |  | 0.118     | 0.332     |        | 0.326 NA  |        |
| A023040_01 |    | 0.135 NA  |          | 0.301 NA  |    |           |  | 0.073 NA  | NA        |        | NA        |        |
| A023041_01 |    | 0.256     | 0.12     | 0.061     |    | -0.144    |  | 0.206     | -0.026    |        | 0.3       | -0.041 |
| A023043_01 | NA |           | NA       | 0.081     |    | -0.125 NA |  | NA        |           |        | 0.183     | -0.003 |
| A023045_01 |    | 0.632     | 0.454    | 0.188     |    | 0.075     |  | 0.618     | 0.412     |        | 0.618     | 0.417  |
| A023054_01 | NA |           | NA       | -0.126    |    | -0.097    |  | 0.033 NA  |           |        | -0.177    | 0.181  |
| A023061_01 |    | 1.103 NA  |          | 0.369 NA  |    | NA        |  | NA        | NA        |        | NA        |        |
| A023066_01 |    | 0.114     | 0.117    | -0.04     |    | -0.048    |  | 0.051     | -0.058    |        | 0.099     | 0.025  |
| A023075_01 |    | -0.37     | -0.178   | -0.061    |    | -0.106    |  | -0.523    | -0.022    |        | -0.425    | -0.206 |
| A023079_01 |    | -1.133 NA |          | -1.144    |    | -1.139 NA |  |           | -1.766    |        | -1.303    | -1.142 |
| A023080_01 |    | -0.505    | -0.23    | 0.166     |    | 0.058     |  | 0.103     | 0.052     |        | 0.121     | -0.044 |
| A023089_01 |    | 0.647     | 0.353    | 0.204     |    | -0.134    |  | 0.414     | 0.077     |        | 0.369     | 0.284  |
| A023091_01 | NA |           | NA       | 1.056     |    | 0.725     |  | 1.317     | 0.859     |        | 0.705     | 0.523  |
| A023102_01 | NA |           | NA       | 0.233 NA  |    | NA        |  | NA        |           |        | 0.489     | 0.297  |
| A023109_01 |    | 0.288     | 0.148    | 0.065     |    | 0.018     |  | -0.054    | -0.054    |        | -0.086    | -0.158 |
| A023113_01 |    | 0.456     | 0.382    | 0.071     |    | -0.029    |  | -0.108    | -0.047    |        | 0.2       | 0.118  |
| A023114_01 |    | 0.551     | 0.421    | -0.218    |    | -0.39     |  | 0.487     | 0.16      |        | -0.006    | -0.145 |
| A023119_01 |    | 0.128     | 0.037    | -0.205    |    | -0.288    |  | 0.406     | 0.311     |        | 0.429     | 0.001  |
| A023126_01 |    | 0.673     | 0.342    | 0.258     |    | 0.014     |  | 0.268 NA  |           |        | 0.2       | -0.127 |
| A023130_01 |    | -0.025    | -0.254   | -0.38 NA  |    |           |  | -0.079    | -0.575    |        | -0.299 NA |        |
| A023136_01 |    | -0.739    | -0.523   | 0.441     |    | 0.326     |  | 0.107     | 0.22      |        | 0.292     | 0.202  |
| A023137_01 |    | -1.223    | -1.003   | -0.349    |    | -0.239    |  | -0.83     | -0.817    |        | -0.628    | -0.551 |
| A023138_01 |    | 0.071     | 0.21     | 0.207 NA  |    |           |  | 0.618     | 0.591     |        | 0.629     | 0.963  |
| A023148_01 |    | 0.703     | 0.55     | 0.351     |    | 0.126     |  | 0.184     | 0.057     |        | 0.357     | 0.266  |
| A023158_01 |    | -0.244    | -0.106   | -0.18 NA  |    |           |  | -0.568 NA | NA        |        | NA        |        |
| A023159_01 |    | 0.332     | 0.308    | -0.127    |    | -0.076    |  | 0.25      | 0.494     |        | 0.629     | 0.755  |
| A023163_01 |    | -0.574 NA |          | -0.079 NA |    |           |  | -0.166    | -0.414    |        | 0.262     | 0.118  |
| A023177_01 |    | 0.155     | 0.104    | -0.269    |    | -0.343    |  | -0.243    | 0.045     |        | 0.123     | 0.058  |
| A023183_01 |    | -1.255    | -0.721   | 0.146     |    | 0.057     |  | -0.157    | -0.062    |        | 0.017     | -0.144 |
| A023185_01 |    | -0.23     | 0.12     | 0.387     |    | 0.117     |  | 0.224     | 0.285     |        | 0.285     | 0.011  |
| A023186_01 |    | -0.186    | -0.134   | 0.05      |    | -0.039    |  | -0.239    | -0.262    |        | 0.142     | 0.027  |
| A023188_01 |    | -0.565    | -0.499   | 0.356     |    | 0.257     |  | 0.154     | 0.011     |        | 0.043     | -0.025 |
| A023198_01 | NA |           | NA       | -0.965 NA |    | NA        |  | NA        | NA        |        | NA        |        |
| A023199_01 |    | 1.244     | 0.523    | -0.042    |    | -0.129    |  | 1.167     | 0.596     |        | 0.581     | 0.544  |
| A023202_01 |    | -0.854 NA |          | 0.152     |    | 0.066     |  | -0.213    | -0.512    |        | -0.47     | -0.574 |
| A023223_01 | NA |           | NA       | 0.525     |    | 0.298 NA  |  | NA        |           |        | 0.263     | 0.219  |
| A023228_01 |    | -0.145    | 0.219    | 0.41      |    | 0.257     |  | 0.681     | 0.536     |        | 0.665     | 0.656  |
| A023230_01 |    | -0.637    | -0.068   | 0.083     |    | 0.185     |  | -0.28     | -0.323    |        | -0.131    | -0.052 |
| A023232_01 | NA |           | -0.326   | 0.222     |    | 0.21      |  | -0.096 NA | NA        |        |           | 0.041  |
| A023237_01 |    | -0.856    | 0.377    | 0.124     |    | -0.127    |  | -0.582    | 0.357 NA  |        |           | 0.231  |
| A023239_01 |    | 0.286 NA  |          | -0.405    |    | -0.572    |  | 0.182     | -0.097    |        | -0.224    | -0.247 |
| A023241_01 |    | 0.307     | 0.294    | -0.059    |    | -0.052    |  | 0.177     | 0.163     |        | 0.29      | 0.361  |
| A023242_01 |    | -0.764    | -0.589   | 0.594     |    | 0.419     |  | 0.228     | 0.401     |        | 0.339     | 0.41   |
| A023250_01 |    | -0.18     | 0.375    | -0.54     |    | -0.254    |  | -0.313    | 0.921     |        | 0.381     | 0.919  |
| A023252_01 |    | -0.213    | -0.147   | 0.193     |    | -0.064    |  | 0.02      | -0.356    |        | -0.268    | -0.524 |
| A023259_01 |    | 0.401     | 0.279    | 0.314     |    | 0.089     |  | 0.715     | 0.615     |        | 0.762     | 0.558  |
| A023272_01 |    | 0.329     | 0.314    | 0.546     |    | 0.583     |  | 0.429     | 0.739     |        | 0.633     | 0.831  |
| A023277_01 |    | 0.998     | 0.779    | 0.565     |    | 0.405     |  | 0.97      | 0.883     |        | 0.669     | 0.661  |
| A023279_01 |    | 0.056     | 0.176    | 0.085     |    | -0.035    |  | -0.139    | 0.006     |        | 0.618     | 0.523  |
| A023283_01 |    | -0.59 NA  |          | 0.742     |    | 0.579     |  | 0.467     | 0.608     |        | 0.674     | 0.845  |
| A023287_01 | NA |           | NA       | 0.24 NA   |    | NA        |  | NA        |           |        | 0.406 NA  |        |
| A023290_01 |    | 0.674 NA  |          | 0.351     |    | -0.147    |  | 0.385     | 0.1       |        | 0.354     | -0.099 |
| A023297_01 |    | -0.343    | -0.466   | -0.109    |    | -0.353    |  | -0.295    | -0.254    |        | 0.003     | -0.334 |
| A023312_01 |    | 0.916     | 0.322    | 0.314     |    | -0.017    |  | 0.313     | 0.4       |        | 0.514     | 0.318  |
| A023324_01 |    | 0.155     | -0.104   | -1.066    |    | -1.108    |  | -0.498    | -0.428    |        | -0.288    | -0.108 |
| A023329_01 |    | 0.283     | 0.155    | 0.38      |    | 0.031     |  | 0.398     | 0.28      |        | 0.445     | 0.293  |
| A023335_01 |    | 0.415 NA  |          | -0.487 NA |    |           |  | -0.359    | -0.533 NA |        | NA        |        |
| A023339_01 |    | -0.142    | -0.111   | -0.002    |    | 0.072     |  | -0.279    | -0.246    |        | -0.066    | 0.19   |
| A023346_01 |    | 0.673 NA  |          | 0.115 NA  |    |           |  | -0.014 NA |           |        | -0.024 NA |        |
| A023347_01 | NA |           | -0.985   | -0.483    |    | -0.318    |  | -0.124    | -0.9      |        | -0.669    | -0.7   |
| A023348_01 | NA |           | NA       | -0.046    |    | -0.201 NA |  | NA        |           |        | 0.021     | 0.159  |
| A023353_01 |    | -0.063    | 0.03     | 0.332     |    | 0.193     |  | 0.41      | 0.321     |        | 0.285     | 0.4    |
| A023354_01 |    | 0.723     | 0.65     | 0.179     |    | 0.036     |  | 0.297     | 0.519     |        | 0.496     | 0.606  |
| A023363_01 |    | -0.274    | -0.335   | -0.473    |    | -0.386    |  | -0.631    | -0.485    |        | -0.287    | -0.421 |
| A023376_01 | NA |           | NA       | -0.14     |    | -0.345 NA |  | NA        |           |        | 0.279     | 0.167  |
| A023378_01 |    | -0.301    | -0.219   | -0.141    |    | -0.063    |  | -0.147    | -0.02     |        | -0.187    | -0.241 |
| A023386_01 |    | -0.043    | 0.243    | 0.298     |    | 0.141     |  | 0.365     | 0.383     |        | 0.649     | 0.567  |

|            |    |           |          |           |           |           |          |           |        |
|------------|----|-----------|----------|-----------|-----------|-----------|----------|-----------|--------|
| A023389_01 |    | -0.108 NA |          | -0.859    | -0.366    | -0.363 NA |          | -0.358    | -0.032 |
| A023404_01 |    | 0.945     | 0.625 NA | NA        |           | 0.186     | 0.19 NA  | NA        |        |
| A023424_01 | NA | NA        |          | 0.036     | -0.102    | 0.441     | 0.525    | 0.275     | 0.399  |
| A023428_01 | NA | NA        |          | 0.113     | -0.098 NA | NA        |          | -0.375    | -0.534 |
| A023431_01 |    | 0.935     | 0.176    | -0.539    | -0.323 NA | NA        |          | -0.676    | -0.614 |
| A023433_01 |    | 1.033     | 0.884    | 0.309     | 0.077     | 0.912     | 0.834    | 0.525     | 0.448  |
| A023440_01 |    | 0.473     | 0.649    | 0.423     | 0.191     | 0.952     | 0.557    | 0.591     | 0.47   |
| A023441_01 |    | 0.584 NA  |          | 0.407     | 0.179     | 0.742     | 0.299    | 0.124     | 0.078  |
| A023443_01 | NA | NA        |          | 0.305     | 0.157 NA  | NA        | NA       |           | 0.094  |
| A023453_01 |    | 0.236     | 0.144    | -0.162    | -0.076    | -0.045    | 0.111    | 0.169     | 0.377  |
| A023457_01 |    | -1.559    | -1.351   | -0.553    | -0.441    | -1.3      | -1.041   | -0.767    | -0.854 |
| A023470_01 |    | 0.299     | 0.092    | -0.576    | -0.386    | -0.115    | -0.07    | 0.03      | 0.102  |
| A023473_01 | NA | NA        |          | -0.178    | -0.419 NA | NA        |          | -0.104    | -0.282 |
| A023476_01 |    | -0.852    | -0.71    | -1.002    | -1.022    | -1.13 NA  |          | -0.683    | -0.709 |
| A023491_01 |    | -0.036    | -0.033   | 0.171     | -0.013    | 0.79      | 0.7      | 0.569     | 0.382  |
| A023504_01 |    | 0.418     | 0.317    | 0.438     | 0.264     | 0.645     | 0.669    | 1.135     | 1.101  |
| A023507_01 |    | 0.907     | 0.654    | 0.029     | 0.091     | 0.285     | 0.474    | -0.054    | 0.395  |
| A023523_01 |    | 0.476     | 0.456    | -0.051    | -0.244    | 0.378     | 0.521    | 0.848     | 0.694  |
| A023537_01 | NA | NA        |          | 0.373     | 0.342     | 0.654     | 0.558    | 0.528     | 0.59   |
| A023546_01 |    | 0.234     | -0.159   | 0.129     | -0.173 NA |           | -0.253   | -0.205    | -0.435 |
| A023566_01 |    | -0.187    | -0.342   | -0.341    | -0.404    | -0.148    | -0.147   | 0.215     | 0.457  |
| A023589_01 |    | 0.484     | 0.193    | -0.075    | -0.276    | -0.096    | -0.136   | 0.12      | 0.056  |
| A023607_01 |    | 0.662 NA  |          | -0.034 NA |           | 0.125 NA  | NA       | NA        |        |
| A023609_01 |    | 0.166     | 0.084    | 0.077     | 0.047     | -0.277 NA |          | -0.176    | -0.07  |
| A023620_01 |    | 0.518     | 0.403    | 0.258     | 0.3       | 0.445     | 0.687    | 0.913     | 1.158  |
| A023621_01 |    | -0.61     | -0.391   | 0.322     | 0.123     | 0.438     | 0.388    | 0.279     | 0.137  |
| A023622_01 |    | 0.531 NA  |          | 0.311     | 0.017     | 0.065     | -0.093   | 0.149     | -0.115 |
| A023623_01 |    | -1.18     | -0.336   | -0.319    | -0.247    | 0.318     | 0.2      | 0.228     | 0.015  |
| A023629_01 | NA | NA        |          | -0.377    | -0.436 NA | NA        |          | -0.297    | -0.33  |
| A023630_01 |    | 0.502 NA  |          | -0.453    | -0.244    | 0.364 NA  |          | -0.154 NA |        |
| A023652_01 |    | 0.287     | 0.202    | -0.207 NA |           | 0.213     | 0.173 NA | NA        |        |
| A023658_01 | NA | NA        |          | -0.007    | -0.016 NA | NA        |          | -0.041    | -0.313 |
| A023665_01 |    | -0.296    | -0.057   | -0.381    | -0.363    | 0.184     | 0.179    | 0.526     | 0.368  |
| A023672_01 |    | 0.493     | 0.619    | 0.178     | -0.013    | 0.264     | 0.091    | 0.062     | 0.077  |
| A023685_01 | NA | NA        |          | 0.237     | 0.169 NA  | NA        |          | 0.305     | 0.484  |
| A023689_01 |    | 0.648     | 0.341    | 0.417     | 0.242     | 0.586     | 0.668 NA |           | 0.917  |
| A023712_01 | NA |           | -1.614   | -0.062    | -0.057    | -0.444    | -0.324   | -0.175    | 0.043  |
| A023721_01 |    | 1.002     | 1.165    | -0.447    | -0.504    | 0.195     | 0.31     | 0.416     | 0.469  |
| A023735_01 | NA | NA        |          | 0.017     | -0.111 NA | NA        |          | 0.137     | 0.264  |
| A023745_01 | NA | NA        |          | 0.32      | 0.11      | -0.406 NA |          | 0.142     | 0.016  |
| A023754_01 |    | 0.369     | 0.255    | -0.294    | -0.121    | -0.095    | -0.152   | -0.061    | 0.141  |
| A023756_01 |    | 0.111     | 0.203    | -0.248    | -0.263    | -0.443    | -0.243   | -0.382    | -0.233 |
| A023760_01 |    | 0.508     | 0.413    | -0.737    | -0.56     | 0.497     | 0.291    | -0.048    | 0.147  |
| A023776_01 | NA | NA        |          | 0.751     | 0.425 NA  | NA        |          | -0.117    | -0.17  |
| A023797_01 |    | 0.34      | 0.406    | 0.032     | -0.005    | -0.076    | -0.099   | 0.215     | 0.264  |
| A023802_01 |    | 0.637     | 0.661 NA | NA        |           | 0.788     | 0.87 NA  |           | 1.394  |
| A023806_01 | NA | NA        |          | -0.153    | -0.475 NA | NA        |          | -0.601    | -0.732 |
| A023808_01 |    | 0.239     | 0.165    | -0.008    | -0.067    | 0.186     | 0.078    | 0.087     | 0.096  |
| A023814_01 |    | 0.262     | 0.467    | 0.028     | 0.21      | 0.142     | 0.541    | 0.298     | 0.65   |
| A023818_01 | NA | NA        |          | -0.604    | -0.601 NA | NA        |          | 0.295     | 0.278  |
| A023824_01 |    | -1.006    | -1.081   | 0.048     | 0.045     | -0.658    | -0.62    | -0.082    | -0.296 |
| A023852_01 |    | 0.273     | 0.253    | 0.551     | 0.137     | 0.402     | 0.278    | 0.337 NA  |        |
| A023870_01 |    | 0.53      | 0.382    | -0.09     | -0.102    | 0.458     | 0.326    | 0.333     | 0.426  |
| A023876_01 |    | 0.207 NA  |          | -0.063    | -0.258    | 0.225     | 0.109    | 0.323     | 0.279  |
| A023896_01 | NA |           | 0.236    | 0.531     | 0.346     | 1.006     | 0.67 NA  |           | 0.877  |
| A023897_01 |    | 0.433     | 0.344    | -0.139    | 0.013     | 0.069     | 0.041    | 0.102     | 0.349  |
| A023902_01 |    | 0.721     | 0.372    | 0.04 NA   | NA        |           | 0.085 NA | NA        |        |
| A023904_01 |    | -0.262    | -0.528   | -0.192    | -0.057    | -1.062    | -1.002   | -0.986    | -0.875 |
| A023913_01 |    | 0.137     | -0.347   | -0.655    | -0.589    | -0.013    | -0.364   | -0.113    | -0.312 |
| A023941_01 | NA | NA        |          | -0.233    | -0.254 NA |           | -0.578   | -0.163    | 0.136  |
| A023943_01 |    | 0.849     | 0.712    | 0.112     | 0.073     | 0.505     | 0.211    | 0.392     | 0.368  |
| A023982_01 | NA | NA        |          | 0.005 NA  | NA        | NA        |          | -0.436 NA |        |
| A023987_01 | NA | NA        |          | -0.137    | -0.26 NA  | NA        |          | 0.002     | -0.283 |
| A023993_01 | NA |           | -0.855   | -0.018    | 0.006     | 0.042     | -0.14    | 0.011     | 0.11   |
| A023994_01 |    | 0.588     | 0.211    | -0.516 NA | NA        |           | 0.178 NA | NA        |        |
| A023999_01 |    | -0.826 NA |          | -0.216 NA |           | 0.007     | -0.237   | 0.23 NA   |        |
| A024001_01 | NA | NA        |          | 0.007     | -0.473    | -0.338 NA |          | -0.262 NA |        |
| A024024_01 |    | -0.148    | -0.184   | -0.541    | -0.595    | -0.341    | -0.239   | -0.272    | -0.151 |



|            |    |           |          |          |           |           |        |           |        |
|------------|----|-----------|----------|----------|-----------|-----------|--------|-----------|--------|
| A024026_01 |    | 0.236     | 0.476    | 0.336    | 0.12      | 0.786     | 0.489  | 0.487     | 0.319  |
| A024027_01 |    | 0.533 NA  |          | -0.012   | -0.191 NA | NA        |        | -0.281    | -0.446 |
| A024030_01 | NA |           | 0.017    | 0.253 NA |           | 0.481     | 0.205  | 0.486     | 0.155  |
| A024035_01 |    | 0.171     | 0.048    | 0.004    | -0.064    | 0.17      | 0.133  | 0.063     | 0.108  |
| A024038_01 |    | 1.503     | 0.978    | -0.472   | -0.116    | 0.906     | 1.018  | 1.407     | 1.828  |
| A024039_01 |    | 1.005     | 1.204    | -0.138   | -0.108    | 0.241     | 0.446  | 0.723     | 0.759  |
| A024040_01 |    | 0.223     | 0.381    | -0.206   | -0.247    | -0.062    | -0.061 | 0.408     | 0.34   |
| A024042_01 |    | 0.639 NA  |          | 0.182    | 0.217     | 0.346 NA  |        | 0.021     | 0.028  |
| A024046_01 |    | 0.475     | 0.399    | 0.367    | 0.172     | 0.285 NA  | NA     |           | 0.34   |
| A024056_01 |    | -0.134    | -0.058   | 0.258    | 0.167     | -0.235    | -0.087 | 0.15      | -0.044 |
| A024063_01 |    | 0.057     | 0.201    | 0.231    | 0.412     | 0.528     | 0.909  | 0.644     | 0.841  |
| A024067_01 |    | 0.336     | 0.67     | -0.049   | -0.004    | 0.254     | 0.64   | 0.302     | 0.345  |
| A024071_01 | NA | NA        |          | 0.238    | -0.135    | 0.589     | 0.47   | 0.178     | 0.321  |
| A024074_01 |    | 0.652     | 0.228    | -0.022   | -0.195    | 0.336     | 0.212  | 0.16      | 0.071  |
| A024084_01 |    | 0.397     | 0.218    | 0.31     | 0.01      | 0.186     | 0.067  | 0.193     | 0.081  |
| A024086_01 |    | -0.741    | -0.197   | 0.068    | 0.027     | 0.18      | 0.281  | -0.073    | -0.018 |
| A024089_01 | NA | NA        |          | 0.013 NA | NA        | NA        |        | -0.041 NA |        |
| A024092_01 |    | 0.34      | 0.491    | 0.335    | 0.174     | 0.492     | 0.496  | 0.557     | 0.486  |
| A024099_01 |    | 0.361     | 0.119    | -0.183   | -0.502    | 0.914     | 0.694  | 0.21      | 0.4    |
| A024101_01 |    | 0.279     | -0.089   | -0.264   | -0.226    | -0.472    | -0.71  | -0.255    | 0.002  |
| A024105_01 |    | -1.003    | -0.912   | -0.641   | -0.659    | -1.2      | -0.854 | -0.577    | -0.654 |
| A024106_01 |    | 0.252     | 0.295    | 0.129    | -0.041    | 0.319     | 0.115  | 0.171     | 0.008  |
| A024107_01 |    | 0.202     | 0.305    | 0.429    | 0.269     | 0.831     | 0.528  | 0.444     | 0.456  |
| A024109_01 |    | 0.79      | 0.446 NA | NA       |           | 0.384     | 0.389  | 0.417     | 0.648  |
| A024112_01 |    | -0.606    | -0.486   | -0.884   | -0.805    | -0.584    | -0.376 | -0.351    | -0.324 |
| A024113_01 |    | -0.828 NA |          | 0.33     | 0.122     | -0.41     | -0.516 | -0.389    | -0.413 |
| A024114_01 |    | 0.033     | -0.099   | 0.505    | 0.342     | -0.282    | -0.324 | -0.201    | -0.215 |
| A024115_01 |    | 0.129 NA  |          | 0.194    | 0.2       | -0.11 NA  |        | -0.126    | -0.124 |
| A024116_01 |    | -0.832    | -0.717   | 0.184    | -0.055    | -0.352    | -0.234 | 0.075     | -0.211 |
| A024118_01 | NA | NA        |          | 0.265    | 0.216 NA  | NA        |        | -0.264    | -0.428 |
| A024123_01 |    | 0.021     | 0.004    | 0.275    | 0.002     | 0.406     | 0.076  | 0.529     | 0.339  |
| A024128_01 |    | -0.025    | -0.02    | -0.032   | -0.034    | -0.264    | -0.028 | 0.078     | 0.088  |
| A024151_01 | NA | NA        |          | 0.033    | -0.144    | 0.093 NA  |        | -0.084    | -0.327 |
| A024153_01 |    | 0.365     | 0.29     | -0.279   | -0.305    | -0.083    | 0.032  | 0.081     | 0.166  |
| A024157_01 | NA | NA        |          | 0.485    | 0.184     | 0.729     | 0.387  | 0.168     | 0.085  |
| A024160_01 |    | 0.621     | 0.229    | 0.413    | 0.064     | 0.496     | 0.171  | 0.241     | -0.031 |
| A024161_01 |    | 0.148     | 0.287    | 0.233    | 0.183     | 0.053     | 0.121  | 0.116     | 0.139  |
| A024166_01 | NA | NA        | NA       | NA       | NA        | NA        |        | 0.126 NA  |        |
| A024169_01 |    | 0.289     | 0.294    | -0.712   | -0.629    | -0.586    | -0.191 | -0.39     | -0.046 |
| A024172_01 |    | -1.114 NA |          | 0.202    | 0.112     | 0.141 NA  |        | -0.005    | -0.221 |
| A024173_01 |    | 0.097     | -0.006   | 0.371    | 0.047     | 0.178     | 0.033  | 0.374     | 0.116  |
| A024174_01 |    | -0.783    | -0.534   | 0.005    | -0.014    | -0.687    | -0.886 | -0.737    | -0.859 |
| A024175_01 | NA | NA        |          | 0.259    | -0.021    | -0.236 NA |        | -0.072    | -0.148 |
| A024176_01 |    | 0.582     | 0.327    | -0.542   | -0.245    | -0.226    | 0.241  | -0.249    | 0.262  |
| A024180_01 |    | 0.254     | 0.072    | -0.049   | -0.218    | 0.443     | 0.357  | 0.571     | 0.372  |
| A024181_01 |    | -0.224    | -0.293   | 0.534    | 0.31      | 0.401     | 0.125  | 0.194     | 0.018  |
| A024182_01 |    | 0.673     | 0.593    | 0.275    | 0.242     | 0.75      | 1.062  | 1.219     | 1.25   |
| A024183_01 |    | 0.1       | 0.265    | 0.284    | 0.096     | 0.43      | 0.413  | 0.712     | 0.626  |
| A024184_01 |    | -0.671    | -0.502   | 0.312    | 0.042     | -0.108    | -0.337 | 0.158     | -0.204 |
| A024187_01 |    | 0.008     | -0.139   | 0.261    | 0.068     | 0.386     | 0.288  | 0.333     | 0.109  |
| A024188_01 |    | -0.224    | 0.174    | -0.455   | -0.254    | 0.191     | 0.476  | 0.277     | 0.454  |
| A024191_01 |    | 0.301     | 0.14     | 0.05     | 0.009     | 0.243     | 0.062  | -0.103    | 0.059  |
| A024192_01 |    | 0.13      | 0.79     | 0.234    | 0.234     | -0.162    | 0.038  | 0.178     | 0.37   |
| A024193_01 | NA | NA        |          | -0.2     | -0.244 NA | NA        |        | 0.339     | 0.324  |
| A024195_01 |    | 0.153     | 0.284    | 0.156    | -0.033    | -0.044    | 0.124  | 0.308     | 0.051  |
| A024196_01 |    | 0.545 NA  |          | -0.175   | -0.25     | 0.129 NA  |        | -0.006    | 0.011  |
| A024197_01 |    | -0.371    | -0.215   | 0.119    | 0.043     | 0.194     | -0.059 | 0.03      | -0.034 |
| A024199_01 | NA | NA        |          | 0.398    | 0.1       | -0.341 NA |        | -0.076    | -0.237 |
| A024201_01 | NA | NA        |          | 0.125    | 0.178 NA  |           | 0.159  | -0.052    | 0.033  |
| A024207_01 |    | -0.35 NA  |          | 0.705    | 0.44      | 0.038     | 0.23   | 0.081     | -0.052 |
| A024209_01 |    | -0.498    | -0.366   | -0.108   | -0.097    | -0.323    | -0.1   | -0.152    | -0.031 |
| A024211_01 |    | -0.694    | -0.353   | 0.138    | 0.116     | 0.281     | 0.252  | 0.138     | 0.299  |
| A024212_01 |    | 0.127     | 0.044    | 0.138    | 0.089     | 0.023     | 0.042  | 0.14      | 0.12   |
| A024214_01 |    | 0.05 NA   |          | 0.517    | 0.433     | 0.314 NA  |        | 0.13      | 0.078  |
| A024215_01 |    | -0.706    | -0.74    | -0.578   | -0.538    | -0.844    | -0.796 | -0.621    | -0.7   |
| A024219_01 |    | -0.856    | -0.182   | -0.556   | -0.555    | -0.06     | 0.151  | 0.168     | 0.129  |
| A024220_01 | NA | NA        |          | 0.348    | 0.379 NA  | NA        |        | -0.488    | -0.503 |
| A024222_01 |    | -0.293    | -0.297   | -0.05 NA |           | -0.091    | -0.002 | -0.14     | -0.165 |

|            |    |           |        |           |           |           |          |           |        |
|------------|----|-----------|--------|-----------|-----------|-----------|----------|-----------|--------|
| A024223_01 |    | 0.568 NA  |        | 0.177 NA  |           | 0.473 NA  |          | 0.298 NA  |        |
| A024224_01 |    | 0.069     | 0.112  | 0.127     | 0.085     | 0.047     | 0.031    | 0.239     | 0.046  |
| A024226_01 | NA | NA        |        | -0.811 NA | NA        | NA        |          | -0.293    | -0.316 |
| A024227_01 | NA | NA        |        | -0.202    | -0.352 NA | NA        |          | -0.504    | -0.872 |
| A024228_01 |    | 0.482     | 0.335  | 0.126     | -0.217    | 0.573     | 0.249    | 0.736     | 0.455  |
| A024229_01 | NA | NA        |        | 0.134     | 0.02 NA   | NA        |          | 0.329     | -0.009 |
| A024230_01 |    | -0.161    | -0.056 | 0.578     | 0.499     | -0.705 NA |          | -1.31     | -1.54  |
| A024232_01 |    | 0.279     | 0.263  | 0.162     | 0.124     | 0.589     | 0.575    | 0.519     | 0.559  |
| A024235_01 |    | 0.313     | 0.206  | 0.154 NA  |           | 0.276     | 0.347    | 0.339     | 0.33   |
| A024236_01 |    | 0.27      | 0.174  | -0.079    | -0.271    | -0.218    | -0.347   | -0.036    | -0.197 |
| A024237_01 |    | 0.033     | -0.245 | -0.341    | -0.376    | -0.64     | -0.47    | -0.684    | -0.271 |
| A024239_01 |    | 0.419     | 0.103  | -0.231    | -0.416    | -0.184    | -0.117   | 0.242     | 0.171  |
| A024241_01 | NA | NA        |        | 0.389     | 0.044 NA  | NA        |          | -0.099    | -0.353 |
| A024242_01 |    | 0.363     | 0.349  | -0.135    | 0.126     | 0.314     | 0.181    | 0.047     | 0.239  |
| A024243_01 |    | 0.161     | 0.718  | 0.055     | -0.167    | 0.275     | 0.099 NA |           | 0.498  |
| A024246_01 |    | -0.304    | -0.18  | 0.215     | 0.107     | -0.052    | -0.029   | -0.104    | -0.049 |
| A024247_01 | NA | NA        |        | -0.329 NA | NA        | NA        |          | 0.43      | 0.267  |
| A024248_01 |    | 1.105     | 0.814  | -0.728    | -0.69     | -0.191    | -0.429   | -0.234    | -0.181 |
| A024249_01 |    | -0.103    | 0.146  | 0.028     | -0.047    | 0.429     | 0.339    | 0.325     | 0.322  |
| A024250_01 |    | 0.817     | 0.866  | -0.226    | -0.047    | 0.037     | 0.627    | 0.267     | 0.891  |
| A024251_01 |    | -0.129    | -0.146 | 0.283     | 0.016     | -0.152    | -0.069   | 0.125     | 0.106  |
| A024253_01 |    | 0.078     | 0.008  | -0.133    | -0.323    | 0.014     | -0.08    | 0.287     | 0.106  |
| A024255_01 |    | 0.413     | 0.495  | -0.729    | -0.775    | -0.277    | -0.071   | -0.158    | -0.096 |
| A024257_01 |    | 0.519     | 0.085  | 0.197     | -0.028    | 0.026     | -0.096   | 0.112     | -0.017 |
| A024258_01 |    | -0.071    | -0.003 | -0.285    | -0.426    | -0.014    | -0.076   | 0.395     | 0.334  |
| A024259_01 |    | -2.452    | -2.755 | -1.599    | -1.363    | -1.379    | -1.225   | -1.016    | -1.089 |
| A024261_01 |    | 0.127     | -0.001 | -0.122    | 0.077     | -0.26     | 0.092    | -0.421    | 0.135  |
| A024262_01 | NA | NA        |        | -0.261    | -0.483 NA | NA        |          | 0.025     | -0.045 |
| A024268_01 |    | 0.648 NA  |        | -0.222    | -0.469    | 0.758 NA  |          | 0.612     | 0.419  |
| A024270_01 | NA | NA        |        | 0.171     | 0.252 NA  | NA        |          | -0.043    | 0.089  |
| A024271_01 |    | 0.186     | 0.123  | -0.371    | -0.215    | 0.228     | 0.292    | 0.168     | 0.346  |
| A024272_01 |    | 0.703     | 0.365  | -0.704 NA |           | 0.07      | -0.174   | -0.286    | -0.375 |
| A024274_01 |    | 0.487     | 0.332  | -0.061    | -0.192    | -0.048    | 0.028    | -0.148    | -0.132 |
| A024276_01 |    | -1.355    | -0.72  | -0.463    | -0.423    | -0.445 NA |          | -0.314    | -0.438 |
| A024279_01 |    | 0.602     | 0.48   | -0.196 NA |           | 0.769     | 0.821    | 0.642     | 0.747  |
| A024280_01 |    | 0.405 NA  |        | 0.381 NA  |           | 0.265 NA  | NA       | NA        |        |
| A024282_01 |    | 0.077     | 0.325  | 0.159     | 0.018     | -0.182    | 0.117    | 0.122     | 0.136  |
| A024284_01 | NA | NA        |        | 0.615     | 0.345 NA  | NA        |          | -0.166 NA |        |
| A024286_01 | NA | NA        |        | 0.112     | -0.028 NA | NA        |          | 0.022     | -0.129 |
| A024288_01 |    | 0.034     | 0.088  | -0.497    | -0.353    | -0.013    | 0.121    | -0.005    | 0.207  |
| A024289_01 |    | 0.021     | 0.411  | -0.434    | -0.456    | 0.458     | 0.451    | 0.363     | 0.574  |
| A024291_01 |    | -0.857    | -0.827 | -0.588    | -0.523    | -0.905    | -0.578   | -0.267    | -0.205 |
| A024292_01 |    | 0.247     | 0.035  | 0.382     | 0.127     | 0.884     | 0.432    | 0.033     | -0.231 |
| A024293_01 | NA | NA        |        | 0.209     | 0.187 NA  | NA        |          | -0.265    | -0.363 |
| A024294_01 |    | 0.236     | 0.249  | 0.006     | -0.013    | 0.324     | 0.145    | 0.141     | 0.131  |
| A024296_01 |    | 0.245     | 0.009  | -0.253    | -0.502    | -0.355    | -0.614   | -0.083 NA |        |
| A024297_01 | NA | NA        |        | 0.229 NA  | NA        | NA        |          | 0.326     | 0.117  |
| A024298_01 |    | -0.026    | 0.405  | 0.354     | 0.458     | 0.109     | 0.812    | 0.341     | 0.508  |
| A024299_01 |    | 0.362     | 0.436  | 0.263     | 0.349     | 0.507     | 0.449    | 0.089     | 0.232  |
| A024300_01 |    | 0.159     | 0.025  | 0.398     | 0.319     | -0.3      | -0.114   | -0.187    | -0.097 |
| A024302_01 |    | 0.171     | 0.259  | -0.294    | -0.409    | 0.585     | 0.258    | 0.644     | 0.497  |
| A024303_01 |    | -0.54     | -0.336 | 0.659     | 0.36      | -0.049    | -0.078   | -0.183    | -0.347 |
| A024304_01 |    | -0.684 NA |        | 0.551     | 0.308     | 0.008 NA  |          | 0.05      | -0.031 |
| A024305_01 |    | 0.673     | 0.213  | 0.159     | 0.061     | 0.043     | -0.259   | -0.008    | -0.021 |
| A024306_01 |    | -0.171    | -0.345 | -0.587    | -0.594    | -0.428    | -0.51    | -0.401    | -0.274 |
| A024308_01 |    | 0.018 NA  |        | 0.599     | 0.579     | 0.133     | 0.057    | -0.306    | -0.235 |
| A024310_01 |    | -1.367    | -1.022 | -1.011    | -0.626    | -1.407    | -0.812   | -0.757    | -0.405 |
| A024311_01 | NA |           | -0.685 | -0.9      | -0.902 NA |           | -1.042   | -0.739    | -0.577 |
| A024312_01 |    | -0.404    | -0.268 | 0.085     | -0.05     | -0.018    | -0.07    | 0.111     | 0.047  |
| A024315_01 |    | -0.633    | -0.67  | -0.173    | -0.082    | -0.209    | -0.378   | -0.187    | -0.193 |
| A024318_01 |    | -0.971    | -1.181 | -0.992    | -0.72     | -1.115    | -1.011   | -0.808    | -0.55  |
| A024321_01 |    | -0.778    | -0.347 | -0.251    | -0.302    | -0.263    | -0.208   | 0.053     | 0.138  |
| A024326_01 |    | 0.193     | 0.665  | 0.649     | 0.527     | 0.503     | 1.547    | 0.709     | 1.141  |
| A024328_01 |    | 0.733     | 0.297  | 0.181     | -0.068    | 0.007     | 0.039 NA |           | 0.168  |
| A024330_01 |    | -0.102    | 0.267  | 0.161     | 0.161     | -0.072    | 0.219    | 0.359     | 0.443  |
| A024331_01 |    | -0.045    | 0.361  | -0.207    | -0.307    | 0.375     | 0.447    | 0.773     | 0.555  |
| A024332_01 |    | -1.877    | -1.767 | -1.786    | -1.535    | -2.547    | -2.215   | -2.119    | -2.097 |
| A024337_01 |    | -0.324    | -0.246 | -0.368    | -0.403    | 0.118     | 0.099    | 0.255     | 0.371  |

|            |    |           |        |           |           |          |           |          |        |
|------------|----|-----------|--------|-----------|-----------|----------|-----------|----------|--------|
| A024339_01 |    | 0.051     | -0.223 | -0.834    | -0.773    | -0.082   | -0.261    | 0.267    | 0.221  |
| A024342_01 |    | -1.692    | -1.17  | -0.047    | -0.091    | -1.157   | -1.031    | -0.607   | -0.61  |
| A024343_01 |    | -2.175    | -1.625 | -0.792    | -0.552    | -0.876   | -0.819    | -0.596   | -0.678 |
| A024345_01 | NA | NA        |        | -0.045 NA | NA        | NA       |           | 0.095    | 0.182  |
| A024346_01 |    | 0.238     | -0.272 | -0.397 NA |           | -0.255   | -0.681 NA | NA       |        |
| A024347_01 |    | -0.221    | -0.041 | 0.189     | -0.058    | -0.348   | -0.401    | -0.27    | -0.437 |
| A024348_01 | NA |           | -0.665 | 0.222     | 0.085 NA  | NA       |           | -0.024   | -0.053 |
| A024349_01 |    | 0.815     | 0.764  | -0.884    | -0.589    | 0.144    | 0.601     | -0.76    | -0.485 |
| A024350_01 |    | -0.454 NA |        | 0.113 NA  |           | 0.745 NA |           | 0.34     | 0.566  |
| A024352_01 |    | -0.312    | -0.21  | 0.234     | 0.163     | -0.128   | -0.076    | 0.146    | 0.279  |
| A024353_01 |    | -0.28     | -0.3   | -1.181    | -1.158    | -0.604   | -0.771    | -0.594   | -0.94  |
| A024354_01 | NA | NA        |        | -2.559    | -2.366    | -1.72 NA | NA        |          | -2.566 |
| A024356_01 |    | 0.018     | -0.127 | -0.281    | -0.255    | -0.428   | -0.103    | -0.018   | 0.13   |
| A024357_01 | NA | NA        |        | 0.029     | -0.182 NA | NA       |           | -0.234   | -0.461 |
| A024360_01 |    | -1.487    | -1.697 | 0.122     | -0.006    | -0.898   | -0.686    | 0.111    | -0.056 |
| A024361_01 |    | -1.885    | -1.572 | -0.468    | -0.282    | -1.179   | -0.912    | -1.014   | -0.947 |
| A024362_01 |    | -0.765    | -0.372 | -0.077    | -0.139    | 0.201    | 0.184     | 0.325    | 0.208  |
| A024363_01 | NA | NA        |        | -0.368    | -0.474    | 0.202 NA |           | 0.065    | -0.084 |
| A024368_01 | NA | NA        |        | 0.065 NA  |           | 0.17 NA  | NA        |          | 0.533  |
| A024369_01 | NA | NA        |        | -0.382 NA | NA        | NA       | NA        | NA       |        |
| A024370_01 |    | 0.71      | 0.711  | 0.046     | -0.021    | 0.752    | 0.529     | 0.502    | 0.482  |
| A024372_01 |    | -0.452    | 0.075  | 0.627     | 0.437     | 0.147    | 0.463     | 0.416    | 0.413  |
| A024373_01 |    | -0.228    | -0.079 | 0.422     | 0.089     | 0.838    | 0.557     | 0.478    | 0.467  |
| A024374_01 |    | -0.624    | -0.057 | -0.14 NA  |           | 0.653    | 0.482     | 0.637    | 0.725  |
| A024376_01 |    | -0.754 NA |        | 0.234     | -0.062    | 0.113 NA |           | -0.122   | -0.361 |
| A024377_01 |    | 0.182     | 0.098  | -0.605    | -0.528    | -0.324   | -0.205    | -0.363   | -0.151 |
| A024382_01 |    | -0.033    | -0.077 | 0.311     | 0.119     | -0.075   | 0.204     | -0.035   | -0.033 |
| A024389_01 | NA | NA        |        | 0.191     | -0.001 NA | NA       |           | 0.048    | -0.064 |
| A024392_01 |    | -0.589    | -0.503 | -0.572    | -0.445    | -0.76    | -1.015    | -0.57    | -0.487 |
| A024394_01 |    | -0.086    | 0.091  | -0.046    | -0.09     | 0.297    | 0.374     | 0.183    | 0.274  |
| A024395_01 |    | -0.692    | -0.418 | -0.078    | -0.158    | -0.343   | -0.296    | -0.063   | -0.163 |
| A024396_01 |    | -0.262    | -0.384 | 0.444     | 0.274     | 0.447    | 0.373     | 0.318    | 0.2    |
| A024397_01 |    | 0.213     | 0.174  | -0.221    | -0.337    | 0.468    | 0.102     | 0.467    | 0.318  |
| A024398_01 |    | -0.923    | -0.653 | -0.312    | -0.519    | -0.128   | -0.241    | 0.092    | 0.017  |
| A024399_01 |    | -0.822    | -0.461 | 0.043     | -0.231    | 0.398    | 0.27      | 0.814    | 0.569  |
| A024400_01 |    | -0.982    | -0.339 | 0.091     | 0.111     | -0.02    | 0.134     | 0.006    | 0.106  |
| A024401_01 | NA | NA        |        | 0.408     | 0.085 NA  | NA       | NA        | NA       |        |
| A024402_01 | NA | NA        |        | -0.043    | -0.268 NA | NA       | NA        |          | -0.336 |
| A024403_01 |    | -0.772    | -0.628 | -0.081    | -0.086    | -0.292   | -0.212    | -0.298   | -0.237 |
| A024404_01 |    | -0.257    | -0.13  | 0.051     | 0.104     | -0.191   | -0.081    | -0.033   | 0.046  |
| A024405_01 | NA | NA        |        | 0.537     | 0.546 NA  | NA       |           | 0.239    | 0.242  |
| A024406_01 | NA | NA        |        | 0.459     | 0.207 NA  | NA       |           | 0.097    | 0.156  |
| A024410_01 |    | -1.126    | -1.173 | -0.374    | -0.202    | -0.961   | -0.966    | -0.75    | -0.708 |
| A024413_01 |    | 0.187     | -0.004 | 0.204     | 0.198     | -0.263   | -0.276    | -0.155   | -0.18  |
| A024414_01 |    | -0.778    | -0.418 | 0.151     | 0.093     | -0.111   | -0.054    | 0.09     | 0.082  |
| A024417_01 |    | -0.002 NA |        | 0.83      | 0.31      | 0.199 NA |           | 0.152    | -0.127 |
| A024421_01 |    | 0.148     | 0.368  | 0.78      | 0.33      | 1.175    | 0.811     | 0.75     | 0.73   |
| A024425_01 |    | -0.907    | -0.456 | 0.178     | 0.157     | -1.367   | -0.501    | -0.205   | -0.095 |
| A024428_01 | NA | NA        |        | 0.109 NA  | NA        | NA       |           | 0.233 NA |        |
| A024429_01 | NA | NA        | NA     |           | -0.295 NA | NA       | NA        |          | 0.209  |
| A024430_01 |    | -0.296    | -0.191 | 0.348     | 0.283     | 0.277    | 0.364     | 0.604    | 0.653  |
| A024431_01 |    | 0.503     | 0.183  | 0.322     | 0.17      | 0.062    | -0.112    | -0.034   | -0.096 |
| A024434_01 |    | 0.344     | 0.147  | 0.241     | 0.208     | 0.51     | 0.498     | 0.474    | 0.701  |
| A024435_01 |    | -0.353    | 0.055  | -0.173    | 0.004     | 0.224    | 0.558     | 0.427    | 0.573  |
| A024439_01 |    | 0.12      | 0.258  | -0.027    | -0.035    | 0.497    | 0.63      | 0.307    | 0.494  |
| A024440_01 | NA | NA        |        | 0.267     | 0.111 NA  | NA       |           | -0.812   | -1.088 |
| A024441_01 | NA | NA        |        | -0.607    | -0.559 NA | NA       |           | 0.097    | 0.021  |
| A024442_01 |    | -0.128    | 0.208  | 0.301     | 0.258     | 0.347    | 0.49      | 0.474    | 0.512  |
| A024443_01 |    | -1.158    | -1.044 | -0.953    | -0.841    | -1.344   | -0.936    | -1.053   | -0.92  |
| A024445_01 | NA | NA        |        | -0.111    | -0.342 NA | NA       |           | -0.115   | -0.164 |
| A024447_01 |    | 0.266     | 0.616  | -0.047    | -0.04     | 0.953    | 1.047     | 0.599    | 0.742  |
| A024449_01 |    | -0.077    | -0.047 | -0.791    | -0.758    | -0.227   | -0.201    | -1.018   | -0.908 |
| A024451_01 |    | -0.21     | 0.005  | -0.198    | -0.291    | 0.192    | 0.209     | 0.227    | 0.073  |
| A024452_01 |    | 0.181     | 0.034  | 0.095     | -0.085    | -0.526   | -0.419    | -0.047   | -0.096 |
| A024453_01 |    | -0.204    | -0.223 | -0.342    | -0.24     | -0.358   | -0.187    | -0.299   | -0.159 |
| A024454_01 |    | -2.813    | -3.854 | -4.824    | -3.46     | -2.832   | -1.915    | -2.845   | -3.229 |
| A024456_01 |    | -1.281    | -0.768 | 0.308     | 0.18      | -0.267   | -0.02     | 0.217    | 0.02   |
| A024457_01 | NA | NA        |        | 0.526     | 0.399     | 1.329    | 0.653     | 1.126    | 1.092  |

|               |           |        |           |           |           |        |           |        |
|---------------|-----------|--------|-----------|-----------|-----------|--------|-----------|--------|
| A024459_01    | -0.171    | -0.002 | 0.122     | -0.038    | 0.019     | 0.155  | 0.149     | 0.034  |
| A024461_01    | -0.225    | 0.31   | -0.406    | -0.147    | -0.128    | 0.576  | 0.475     | 0.63   |
| A024464_01    | 0.841     | 0.811  | 0.396     | 0.093     | 0.913     | 0.552  | 1.015     | 0.988  |
| A024465_01    | -0.532    | -0.065 | 0.407     | 0.272     | 0.538     | 0.662  | 0.353     | 0.396  |
| A024470_01    | 0.25      | 0.245  | -0.046    | -0.043    | -0.5      | 0.061  | 0.005     | 0.268  |
| A024471_01    | -1.329    | 0.097  | 0.053     | 0.238     | -0.035    | 0.001  | 0.077     | 0.351  |
| A024473_01    | 1.215     | 1.293  | -0.109    | -0.22     | 0.921     | 1.454  | 1.016     | 1.457  |
| A024474_01    | 0.289     | -0.252 | -0.423    | -0.354    | -0.098    | -0.411 | -0.317    | -0.305 |
| A024475_01    | 0.152     | 0.208  | 0.041     | 0.093     | -0.596    | -0.237 | -0.099    | -0.09  |
| A024476_01    | -0.196    | -0.016 | -0.335    | -0.226    | 0.122     | 0.064  | -0.173    | -0.063 |
| A024477_01    | -0.525 NA |        | 0.191     | -0.006    | 0.047     | -0.018 | 0.112     | 0.06   |
| A024478_01    | 0.069     | 0.237  | -0.259    | -0.004    | -0.185    | 0.007  | -0.142    | -0.062 |
| A024480_01    | 0.376 NA  |        | -0.164 NA |           | 0.102 NA  |        | 0.245 NA  |        |
| A024481_01    | 0.831     | 0.859  | 0.37      | 0.303     | 0.112     | 0.172  | 0.396     | 0.424  |
| A024482_01 NA | NA        |        | 0.249     | 0.079     | 0.294     | 0.192  | 0.369     | 0.285  |
| A024484_01    | 0.54      | 0.516  | 0.266     | 0.297     | 0.359     | 0.371  | 0.186     | 0.268  |
| A024485_01    | 0.468     | 0.529  | 0.504     | 0.342     | 0.145     | -0.226 | -0.329    | -0.482 |
| A024489_01    | -0.164    | -0.228 | 0         | -0.021    | 0.309     | 0.083  | 0.105     | -0.004 |
| A024490_01    | -0.415 NA |        | 0.19 NA   |           | -0.362 NA | NA     | NA        |        |
| A024493_01    | 0.463     | 0.19   | 0.299     | 0.313     | 0.562     | 0.315  | 0.154     | 0.093  |
| A024494_01    | -0.215    | -0.109 | -0.145    | -0.302    | 0.311     | 0.304  | 0.651     | 0.561  |
| A024495_01    | -0.016    | 0.161  | 0.247     | 0.335     | 0.355     | 0.579  | 0.276     | 0.512  |
| A024496_01    | 0.022     | 0.262  | 0.467     | 0.19      | 0.334     | 0.202  | 0.3       | 0.134  |
| A024499_01 NA | NA        |        | 0.058     | -0.094 NA |           | 0.055  | 0.137     | 0.17   |
| A024500_01    | -0.144    | 0.004  | -0.316    | -0.396    | -0.404    | -0.356 | -0.193    | -0.15  |
| A024501_01 NA | NA        |        | 0.16      | 0.245 NA  | NA        |        | -0.908    | -0.826 |
| A024502_01    | 0.625     | 0.714  | 0.289     | 0.152     | 1.242     | 0.783  | 1.029     | 1.018  |
| A024503_01    | 0.577     | 0.968  | 0.091     | 0.258     | 0.871     | 0.826  | 0.646     | 0.784  |
| A024504_01    | 0.459     | 0.107  | -0.334    | -0.346    | 0.273     | 0.238  | -0.169    | -0.126 |
| A024505_01    | -0.148    | -0.005 | -0.037    | -0.155    | 0.101 NA  |        | 0.106     | 0.188  |
| A024506_01    | -0.327    | -0.356 | -0.12     | -0.211    | -0.506    | -0.59  | -0.139    | -0.304 |
| A024507_01    | -0.008    | -0.045 | -0.227    | -0.063    | -0.181    | -0.143 | -0.213    | 0.108  |
| A024508_01    | 0.421     | 0.594  | 0.256     | 0.319     | 0.375     | 0.501  | 0.231     | 0.331  |
| A024509_01    | 0.819     | 0.707  | 0.421     | 0.316     | 0.539     | 0.298  | 0.303     | 0.212  |
| A024510_01 NA | NA        |        | -1.795    | -1.472 NA | NA        |        | -1.014    | -0.924 |
| A024511_01    | -0.116    | -0.063 | 0.609     | 0.356     | 0.423     | 0.334  | 0.106     | -0.076 |
| A024512_01    | 1.167     | 1.126  | -0.34     | -0.166    | -0.571    | -0.317 | -0.129    | 0.108  |
| A024513_01    | -0.487    | -0.257 | -0.073    | -0.076    | -0.295    | -0.208 | -0.447    | -0.374 |
| A024514_01    | -0.107    | 0.277  | 0.315     | 0.198     | 0.079     | 0.2    | 0.509     | 0.168  |
| A024518_01 NA | NA        |        | 0.089     | 0.201 NA  |           | 0.544  | 0.196     | 0.438  |
| A024521_01    | -0.968    | -1.03  | -0.903    | -0.93     | -1.351 NA |        | -0.956    | -1.173 |
| A024522_01    | -0.81     | -0.552 | -0.136    | -0.018    | -0.395    | 0.06   | -0.11     | 0.2    |
| A024523_01    | -0.468    | -0.555 | -0.139    | -0.08     | -0.517    | -0.55  | -0.388    | -0.215 |
| A024526_01    | -1.502    | -0.569 | -0.174    | -0.125    | -0.077    | -0.21  | -0.139    | -0.172 |
| A024527_01    | -2.2      | -1.716 | -1.287    | -1.002    | -2.274    | -1.424 | -0.905    | -0.604 |
| A024528_01    | -1.291    | -0.667 | 0.311     | 0.261     | -0.329    | -0.422 | 0.013     | -0.128 |
| A024530_01    | -0.072    | -0.277 | -0.643    | -0.383    | -0.399    | -0.107 | -0.228    | -0.029 |
| A024531_01    | -0.284    | -0.18  | -1.206    | -0.944    | -0.606    | -0.435 | -0.115    | 0.155  |
| A024532_01    | -1.259    | -0.958 | -0.182    | -0.265    | -0.454    | -0.418 | -0.292    | -0.243 |
| A024534_01 NA | NA        |        | 0.518     | 0.372     | 0.181     | 0.086  | 0.343     | 0.369  |
| A024536_01    | -0.305    | 0.297  | -0.259    | -0.115    | -0.886    | -0.416 | -0.762    | -0.856 |
| A024538_01    | -0.533    | -0.708 | 0.224     | 0.252     | -0.049    | -0.198 | -0.235    | -0.201 |
| A024539_01    | 0.181     | 0.096  | -0.296    | -0.176    | -0.039 NA | NA     |           | 0.058  |
| A024544_01    | 0.26 NA   |        | -0.166    | -0.301    | 0.405 NA  |        | -0.199 NA |        |
| A024545_01    | -0.631    | -0.296 | -0.186    | 0.109     | -0.84     | -0.743 | -0.569    | -0.452 |
| A024546_01    | -0.805    | -0.45  | 0.335     | 0.195     | -0.244    | -0.224 | -0.055    | -0.29  |
| A024547_01    | -0.398 NA |        | 0.461     | 0.322     | 0.058 NA  |        | -0.04     | -0.114 |
| A024548_01    | -0.001    | 0.048  | 0.361     | 0.248     | 0.306     | 0.257  | 0.122     | 0.053  |
| A024549_01    | 0.384     | 0.073  | 0.313     | 0.149     | 0.014     | 0.121  | 0.239     | 0.251  |
| A024551_01    | 0.541     | 0.471  | -0.331 NA |           | 0.478     | 0.328  | 0.515 NA  |        |
| A024554_01    | 0.169     | -0.394 | -0.194    | -0.172    | -0.372    | -0.24  | -0.292    | -0.252 |
| A024555_01    | 1.252     | 0.798  | -0.527    | -0.453    | 0.576     | 0.397  | -0.815    | -0.709 |
| A024557_01    | 0.921     | 0.958  | -0.157    | -0.009    | 0.765     | 0.883  | 0.3       | 0.563  |
| A024558_01    | 0.25      | 0.258  | -0.15     | -0.058    | 0.229     | 0.495  | 0.271     | 0.476  |
| A024559_01    | -0.202    | 0.198  | 0.303     | 0.133     | 0.297     | 0.155  | 0.437     | 0.304  |
| A024560_01    | -0.561    | 0.092  | 0.116     | 0.071     | 0.345     | 0.227  | -0.175    | -0.237 |
| A024561_01    | -1.711    | -1.164 | 0.003     | 0.025     | -0.474    | -0.009 | -0.061    | 0.006  |
| A024562_01    | -1.154    | -1.206 | -0.739    | -0.54     | -1.173    | -1.037 | -0.568    | -0.418 |

|            |    |           |        |        |           |           |         |        |        |
|------------|----|-----------|--------|--------|-----------|-----------|---------|--------|--------|
| A024563_01 |    | 0.94 NA   |        | 0.306  | 0.222     | 0.034 NA  |         | -0.484 | -0.34  |
| A024564_01 |    | -0.408    | -0.205 | 0.009  | 0.163     | -0.584    | -0.637  | -0.34  | -0.3   |
| A024565_01 |    | -0.05     | -0.264 | -0.502 | -0.376    | -0.56     | -0.462  | -0.275 | -0.344 |
| A024567_01 | NA | NA        |        | 0.424  | 0.368 NA  | NA        |         | -0.383 | -0.51  |
| A024568_01 |    | 0.153     | 0      | -0.031 | -0.201    | 0.144 NA  | NA      |        | -0.044 |
| A024569_01 |    | -0.12 NA  |        | -0.51  | -0.459    | -0.699    | -0.879  | -0.339 | -0.196 |
| A024570_01 |    | 0.136     | 0.257  | -0.148 | -0.062    | -0.075    | -0.054  | 0.048  | 0.167  |
| A024571_01 |    | 0.276     | 0.361  | 0.333  | 0.175     | 0.373     | 0.473   | 0.452  | 0.344  |
| A024572_01 |    | 0.062     | -0.182 | 0.112  | 0.086     | -0.158    | -0.219  | 0.071  | 0.1    |
| A024573_01 | NA | NA        |        | -0.31  | -0.452 NA | NA        |         | -0.079 | -0.264 |
| A024575_01 |    | -0.186 NA |        | -0.221 | -0.259    | 0.208     | 0.1     | -0.18  | -0.175 |
| A024576_01 |    | -0.294    | -0.327 | 0.162  | -0.084    | -0.276    | -0.248  | 0.087  | -0.267 |
| A024577_01 |    | 0.364     | 0.314  | 0.213  | 0.011     | 0.462     | 0.64 NA |        | 0.664  |
| A024578_01 |    | -0.953    | -0.422 | 0.191  | 0.231     | 0.635     |         | 0.708  | 0.658  |
| A024579_01 | NA | NA        |        | 0.389  | 0.187 NA  | NA        |         | 0.266  | 0.12   |
| A024580_01 |    | -0.384    | -0.195 | 0.505  | 0.331     | 0.326     | 0.362   | 0.299  | 0.198  |
| A024581_01 |    | -0.098 NA |        | -0.453 | -0.402    | -0.376 NA |         | -0.645 | -0.756 |
| A024583_01 |    | -0.16     | -0.03  | -0.376 | -0.335    | -0.205    | 0.05    | 0.177  | 0.293  |
| A024584_01 |    | 0.123     | 0.391  | -0.507 | -0.195    | -0.342    | 0.454   | -0.017 | 0.425  |
| A024585_01 |    | -0.946    | -0.735 | -0.695 | -0.426    | -1.139    | -0.574  | -0.563 | -0.668 |
| A024586_01 |    | -1.266    | -0.973 | -0.642 | -0.521    | -1.139    | -0.816  | -0.714 | -0.828 |
| A024588_01 |    | -1.204    | -1.028 | -0.049 | -0.004    | -1.177    | -1.005  | -0.412 | -0.535 |
| A024589_01 |    | 0.148     | 0.103  | -0.133 | -0.081    | 0.049     | 0.126   | -0.004 | 0.101  |
| A024590_01 |    | 0.908     | 0.557  | 0.325  | 0.358     | 0.201     | -0.075  | -0.149 | -0.168 |
| A024592_01 |    | 0.573     | 0.485  | -0.145 | -0.108    | 0.235     | 0.183   | 0.124  | 0.161  |
| A024595_01 |    | -0.197    | -0.212 | 0.073  | 0.119     | -0.702    | -0.483  | -0.378 | -0.299 |
| A024596_01 |    | -0.054    | 0.015  | -0.239 | -0.146    | -0.379    | 0.049   | 0.068  | 0.192  |
| A024597_01 |    | -1.279    | -0.832 | 0.195  | 0.149     | -0.35     | -0.475  | -0.245 | -0.527 |
| A024598_01 |    | -0.414    | -0.089 | 0.227  | 0.116     | 0.339     | 0.274   | 0.22   | 0.218  |
| A024599_01 |    | -0.847    | -0.267 | 0.338  | 0.303     | -0.75     | -0.179  | -0.39  | -0.288 |
| A024601_01 |    | -0.058    | -0.198 | -0.093 | -0.274    | 0.087     | -0.139  | -0.066 | -0.119 |
| A024602_01 |    | -0.003    | -0.105 | 0.144  | 0.191     | 0.03      | 0.047   | -0.136 | -0.1   |
| A024603_01 |    | -0.191    | 0.038  | -0.732 | -0.681    | -0.441    | -0.424  | -0.297 | -0.435 |
| A024604_01 |    | -0.77     | -0.829 | 0.091  | -0.056    | 0.302     | 0.084   | 0.114  | -0.114 |
| A024605_01 |    | 0.17      | -0.085 | -0.66  | -0.711    | -0.202    | -0.189  | 0.05   | 0.222  |
| A024606_01 | NA | NA        |        | 0.423  | 0.249     | 0.414     | 0.247   | -0.014 | -0.018 |
| A024607_01 |    | -0.175    | -0.321 | -0.164 | -0.145    | -0.463    | -0.302  | -0.347 | -0.659 |
| A024608_01 |    | -0.095    | 0.222  | -0.111 | -0.096    | 0.001     | -0.022  | -0.157 | -0.375 |
| A024609_01 |    | -0.64     | -0.623 | 0.39   | 0.123     | -0.075    | -0.015  | -0.143 | -0.16  |
| A024610_01 |    | 0.066     | 0.528  | 0.04   | 0.032     | 0.585     | 0.716   | 0.898  | 0.895  |
| A024611_01 |    | -0.596 NA |        | 0.257  | 0.228     | 0.633     | 0.522   | 0.177  | 0.151  |
| A024612_01 |    | -0.235    | -0.079 | 0.758  | 0.658     | 0.248     | 0.507   | 0.114  | 0.259  |
| A024613_01 |    | 0.159     | 0.197  | 0.136  | 0.037     | 0.033     | -0.069  | -0.082 | -0.228 |
| A024614_01 |    | -0.647    | -0.463 | 0.287  | -0.132    | 0.288     | 0.12    | 0.559  | 0.304  |
| A024615_01 |    | -0.42     | -0.148 | -0.157 | -0.049    | -0.281    | 0.067   | -0.21  | -0.166 |
| A024616_01 |    | -1.011    | -1.176 | 0.285  | 0.207     | -0.989    | -1.006  | -0.402 | -0.552 |
| A024617_01 |    | 0.147     | -0.036 | -0.288 | -0.273    | -0.57     | -0.253  | -0.164 | -0.205 |
| A024620_01 |    | -1.386    | -0.902 | 0.342  | 0.482     | -0.374    | -0.122  | -0.014 | 0.116  |
| A024621_01 | NA | NA        |        | -0.292 | -0.321 NA | NA        |         | -0.505 | -0.79  |
| A024622_01 |    | -0.255    | 0.053  | -0.042 | 0.104     | 0.09      | 0.519   | 0.765  | 0.948  |
| A024624_01 |    | -0.449    | -0.167 | 0.078  | 0.027     | 0.142     | 0.318   | 0.173  | 0.292  |
| A024626_01 | NA | NA        |        | -0.16  | -0.24 NA  | NA        |         | -0.286 | -0.299 |
| A024627_01 |    | -0.27     | 0.232  | 0.214  | 0.224     | -0.157    | 0.198   | 0.18   | 0.082  |
| A024628_01 | NA | NA        |        | 0.345  | 0.178 NA  | NA        |         | -0.294 | -0.313 |
| A024629_01 |    | -0.304    | 0.126  | 0.284  | 0.408     | 0.119     | 0.126   | 0.155  | 0.322  |
| A024630_01 |    | -1.546    | -1.513 | -0.588 | -0.608    | -1.11     | -0.905  | -0.693 | -0.918 |
| A024631_01 |    | 0.1       | 0.02   | -0.31  | -0.418    | 0.161     | 0.212   | 0.338  | 0.047  |
| A024632_01 |    | 0.252     | 0.038  | -0.27  | -0.186    | 0.065     | 0.082   | 0.2    | 0.173  |
| A024633_01 |    | -1.201    | -1.49  | -2.277 | -1.74     | -2.074    | -1.956  | -1.864 | -1.81  |
| A024634_01 |    | -0.31     | -0.146 | 0.318  | 0.477     | -0.722    | -0.737  | -0.31  | -0.184 |
| A024635_01 |    | -0.29     | -0.612 | -0.692 | -0.724    | -1.229    | -1.296  | -0.453 | -0.516 |
| A024636_01 |    | -0.701    | -0.227 | 0.657  | 0.468     | -0.051    | 0.258   | 0.356  | 0.187  |
| A024637_01 |    | -1.198    | -0.833 | -0.745 | -0.548    | -1.223    | -0.891  | -0.884 | -0.781 |
| A024638_01 |    | 0.438     | 0.513  | -0.148 | 0.01      | 0.15      | 0.33    | -0.174 | -0.025 |
| A024640_01 |    | -0.821    | -0.593 | 0.059  | 0.034     | -0.273    | -0.344  | 0.025  | -0.172 |
| A024642_01 |    | 0.304     | 0.148  | -0.198 | -0.265    | 0.164     | 0.303   | 0.076  | -0.068 |
| A024644_01 |    | -1.691    | -1.47  | -0.46  | -0.22     | -1.365    | -1.186  | -0.88  | -0.796 |
| A024645_01 |    | 0.272     | 0.315  | 0.019  | 0.013     | 0.382     | 0.447   | 0.467  | 0.498  |

|            |    |        |        |        |        |        |        |        |        |
|------------|----|--------|--------|--------|--------|--------|--------|--------|--------|
| A024646_01 |    | 0.25   | 0.091  | 0.2    | 0.115  | 0.128  | NA     | 0.397  | 0.078  |
| A024647_01 | NA | NA     |        | -1.46  | NA     | NA     | NA     | -1.067 | NA     |
| A024648_01 |    | -0.923 | -0.511 | -0.032 | 0.02   | -0.276 | -0.273 | -0.142 | -0.115 |
| A024649_01 |    | -0.695 | -0.755 | -1.501 | -1.282 | -1.984 | -1.472 | -1.553 | -1.609 |
| A024650_01 |    | -0.058 | -0.15  | 0.177  | 0.135  | -0.115 | -0.52  | -0.034 | -0.11  |
| A024651_01 |    | -0.143 | -0.308 | -0.258 | -0.173 | -0.543 | -0.414 | -0.335 | -0.268 |
| A024652_01 |    | -0.256 | -0.416 | -0.833 | -0.604 | -0.672 | -0.424 | -0.507 | -0.277 |
| A024653_01 |    | 0.768  | NA     | 0.468  | 0.361  | 0.58   | NA     | 0.677  | 0.634  |
| A024656_01 |    | -1.034 | -0.554 | 0.708  | 0.354  | 0.008  | -0.006 | 0.202  | 0.007  |
| A024657_01 | NA |        | -1.478 | -0.153 | 0.018  | -1.381 | -1.092 | -0.987 | -0.743 |
| A024658_01 | NA | NA     |        | 0.393  | 0.269  | 0.57   | 0.28   | 0.078  | 0.068  |
| A024659_01 |    | -0.129 | NA     | -0.254 | -0.227 | 0.31   | NA     | 0.014  | 0.076  |
| A024661_01 |    | 0.901  | 0.516  | 0.248  | 0.027  | 0.44   | 0.282  | 0.389  | 0.302  |
| A024663_01 |    | 0.87   | 0.665  | 0.139  | -0.003 | 0.888  | 0.679  | 0.418  | 0.253  |
| A024664_01 |    | 0.349  | 0.518  | 0.29   | 0.429  | 0.392  | 0.818  | 0.565  | 0.831  |
| A024665_01 |    | 0.32   | 0.34   | 0.387  | 0.254  | 0.153  | -0.009 | 0.043  | 0.066  |
| A024666_01 |    | -0.811 | -0.296 | -0.563 | -0.395 | -0.468 | -0.468 | -0.533 | -0.419 |
| A024667_01 |    | -0.82  | -0.411 | 0.206  | 0.041  | 0.342  | 0.302  | 0.323  | 0.313  |
| A024669_01 | NA | NA     |        | 0.225  | 0.02   | NA     | NA     | 0.087  | -0.209 |
| A024670_01 |    | -0.87  | -0.754 | 0.104  | 0.18   | -0.809 | -0.892 | -0.263 | -0.124 |
| A024671_01 |    | 0.304  | NA     | -0.216 | NA     | -0.143 | -0.375 | -0.066 | NA     |
| A024672_01 |    | 0.177  | 0.032  | 0.144  | 0.262  | -0.282 | -0.262 | 0.163  | 0.388  |
| A024673_01 |    | 0.035  | -0.287 | -0.561 | -0.51  | -0.261 | -0.441 | -0.194 | -0.228 |
| A024674_01 |    | 0.349  | 0.145  | -0.595 | -0.484 | 0.603  | 0.572  | 0.257  | 0.433  |
| A024675_01 |    | -0.326 | 0.013  | 0.085  | -0.061 | 0.522  | 0.339  | 0.398  | 0.28   |
| A024676_01 |    | 0.306  | 0.198  | 0.393  | 0.263  | 0.429  | 0.523  | 0.307  | 0.328  |
| A024677_01 |    | -0.825 | -0.439 | 0.225  | 0.151  | -0.308 | -0.518 | -0.224 | -0.356 |
| A024678_01 |    | 0.359  | NA     | 0.35   | NA     | NA     | NA     | NA     | NA     |
| A024680_01 |    | -0.49  | -0.438 | -0.209 | -0.194 | -1.232 | -0.868 | -0.514 | -0.691 |
| A024681_01 | NA | NA     |        | 0.01   | -0.044 | NA     | NA     | -0.191 | -0.309 |
| A024682_01 |    | -1.172 | -1.036 | 0.693  | 0.625  | -0.844 | -0.862 | -0.038 | -0.02  |
| A024684_01 |    | 0.391  | 0.45   | -0.526 | -0.401 | 0.306  | 0.661  | 0.146  | 0.555  |
| A024686_01 | NA | NA     |        | 0.222  | -0.089 | NA     | NA     | NA     | -0.242 |
| A024687_01 |    | -0.938 | -1.172 | -2.193 | -1.855 | -1.797 | -2.021 | -1.784 | -1.967 |
| A024689_01 |    | -1.353 | -1.476 | 0.743  | 0.331  | -0.115 | -0.142 | 0.012  | -0.181 |
| A024690_01 |    | -2.145 | -1.265 | -0.55  | -0.496 | -1.638 | -0.607 | -0.271 | -0.512 |
| A024694_01 |    | 0.34   | -0.049 | -1.036 | NA     | -0.436 | -0.598 | -0.345 | NA     |
| A024699_01 |    | 1.234  | 1.107  | 0.492  | 0.228  | 1.298  | 0.954  | 0.965  | 0.851  |
| A024718_01 |    | -0.053 | NA     | 0.46   | 0.146  | 0.462  | 0.016  | 0.363  | 0.049  |
| A024719_01 | NA | NA     |        | 0.348  | NA     | NA     | NA     | -0.124 | NA     |
| A024720_01 |    | 0.405  | 0.039  | -0.075 | -0.139 | 0.085  | 0.064  | -0.04  | 0.193  |
| A024724_01 |    | 0.182  | -0.188 | -0.655 | -0.72  | -0.02  | -0.454 | -0.215 | -0.465 |
| A024725_01 |    | -1.001 | -1.003 | -1.621 | -1.625 | -1.132 | -1.254 | -1.252 | -1.613 |
| A024728_01 | NA |        | -1.294 | -0.1   | -0.282 | -0.214 | -0.233 | -0.058 | -0.115 |
| A024749_01 | NA | NA     |        | 0.142  | NA     | NA     | 0.566  | 0.53   | 0.682  |
| A024778_01 |    | -0.036 | -0.269 | 0.229  | NA     | -0.111 | -0.395 | 0.147  | NA     |
| A024780_01 |    | 0.575  | 0.413  | 0.143  | 0.162  | NA     | 0.138  | 0.328  | 0.179  |
| A024783_01 | NA | NA     |        | 0.108  | 0.023  | 0.316  | 0.051  | -0.316 | -0.315 |
| A024784_01 |    | 0.084  | NA     | 0.147  | -0.036 | 0.355  | -0.12  | 0.147  | -0.134 |
| A024785_01 |    | -0.078 | -0.495 | -1.052 | -0.953 | -0.93  | -0.997 | -0.587 | -0.328 |
| A024786_01 |    | 0.419  | -0.338 | -0.044 | -0.304 | -0.125 | -0.593 | -0.052 | -0.365 |
| A024788_01 |    | 0.434  | 0.339  | 0.582  | 0.71   | 0.093  | 0.124  | -0.059 | 0.169  |
| A024789_01 |    | 0.796  | 0.171  | 0.354  | 0.307  | 0.469  | 0.442  | -0.037 | 0.056  |
| A024790_01 |    | -1.23  | -0.386 | 0.139  | 0.072  | -0.905 | -0.021 | 0.029  | 0.018  |
| A024791_01 |    | -0.442 | -0.396 | -0.087 | -0.079 | -1.724 | -1.448 | -0.816 | -0.688 |
| A024794_01 |    | 0.275  | 0.218  | 0.17   | -0.201 | 0.275  | -0.041 | 0.244  | -0.155 |
| A024795_01 | NA | NA     |        | 0.157  | 0.186  | -0.557 | NA     | -0.246 | -0.339 |
| A024822_01 |    | 0.617  | 0.579  | 0.314  | 0.267  | 0.454  | 0.588  | 0.506  | 0.528  |
| A024841_01 | NA | NA     |        | -0.073 | -0.04  | 0.751  | 0.836  | 0.189  | 0.259  |
| A024854_01 |    | -1.007 | NA     | 0.242  | 0.302  | -0.323 | NA     | -0.153 | -0.122 |
| A024856_01 |    | -2.196 | NA     | NA     | NA     | -2.137 | -2.019 | -1.978 | NA     |
| A024862_01 |    | 0.567  | 0.299  | 0.343  | 0.047  | 0.739  | 0.329  | 0.652  | 0.551  |
| A024863_01 | NA |        | -1.304 | -0.502 | -0.528 | -0.277 | -0.517 | -0.036 | -0.287 |
| A024872_01 |    | 1.261  | 0.787  | 0.513  | 0.39   | 1.022  | 0.893  | 0.705  | 0.719  |
| A024873_01 | NA | NA     |        | 0.693  | 0.383  | 0.754  | 0.503  | 0.554  | 0.268  |
| A024876_01 |    | 0.301  | 0.091  | 0.053  | -0.145 | 0.224  | -0.043 | 0.145  | -0.202 |
| A024881_01 |    | 0.263  | -0.171 | 0.495  | 0.251  | 0.895  | 0.381  | 0.83   | 0.631  |
| A024886_01 |    | 0.065  | -0.027 | 0.331  | 0.152  | 0.176  | -0.211 | -0.013 | -0.257 |

|            |    |        |        |        |        |    |        |        |        |        |
|------------|----|--------|--------|--------|--------|----|--------|--------|--------|--------|
| A024890_01 | NA | NA     |        | 0.318  | 0.018  | NA |        | 0.142  | -0.032 | -0.289 |
| A024913_01 |    | -0.48  | -0.745 | -0.382 | -0.333 |    | -0.547 | -0.727 | -0.279 | -0.374 |
| A024975_01 |    | -0.141 | -0.133 | 0.001  | NA     |    | 0.16   | -0.349 | 0.035  | -0.024 |
| A024976_01 | NA | NA     | NA     |        | -0.786 | NA | NA     |        | -0.07  | NA     |
| A024978_01 |    | -0.234 | -0.66  | -0.602 | -0.547 |    | -0.537 | -0.465 | -0.265 | -0.381 |
| A024993_01 |    | -0.015 | -0.573 | -0.135 | -0.279 |    | -0.163 | -0.403 | -0.012 | -0.147 |
| A025018_01 | NA |        | -0.75  | 0.351  | 0.191  |    | 0.329  | 0.09   | 0.12   | 0.075  |
| A025019_01 | NA | NA     |        | 0.67   | 0.448  | NA | NA     |        | -0.497 | -0.711 |
| A025036_01 | NA |        | -0.47  | 0.446  | 0.368  |    | 0.563  | 0.452  | 0.113  | 0.088  |
| A025053_01 | NA | NA     |        | 0.615  | 0.496  | NA | NA     |        | -0.291 | -0.353 |
| A025058_01 |    | -0.655 | -0.461 | -0.857 | -0.761 |    | -0.356 | -0.25  | -0.101 | -0.262 |
| A025060_01 |    | 0.223  | 0.073  | 0.034  | 0.028  |    | 0.872  | 0.864  | 1.715  | 1.573  |
| A025061_01 |    | 1.067  | 0.835  | 0.243  | 0.451  |    | 1.089  | 1.502  | 0.91   | 1.288  |
| A025074_01 |    | 0.351  | 0.442  | 0.441  | 0.211  |    | 0.333  | 0.268  | 0.395  | 0.144  |
| A025076_01 |    | -0.539 | -0.475 | -0.274 | -0.246 |    | 0.255  | 0.174  | 0.014  | 0.012  |
| A025079_01 |    | 1.038  | NA     | 0.166  | 0.162  | NA | NA     |        | 0.102  | NA     |
| A025085_01 | NA |        | -0.972 | -1.092 | -0.935 |    | -0.432 | -0.86  | NA     | NA     |
| A025092_01 |    | 1.557  | 0.943  | -0.02  | NA     |    | 0.679  | 0.739  | 0.65   | NA     |
| A025101_01 |    | -0.094 | -0.085 | -0.165 | -0.322 |    | -0.38  | -0.393 | -0.111 | -0.361 |
| A025116_01 |    | -1.34  | -0.644 | 0.108  | -0.019 | NA |        | -0.072 | -0.065 | -0.088 |
| A025130_01 |    | -0.447 | -0.113 | 0.168  | 0.143  |    | 0.908  | 0.747  | 0.892  | 0.851  |
| A025131_01 |    | 0.272  | 0.046  | -0.122 | -0.005 |    | 0.42   | 0.287  | NA     | 0.183  |
| A025148_01 |    | -0.065 | -0.253 | -0.372 | -0.383 |    | -0.363 | -0.723 | -0.352 | -0.414 |
| A025176_01 | NA |        | -1.183 | 0.681  | 0.389  |    | 0.034  | 0.032  | 0.555  | 0.525  |
| A025188_01 |    | -0.755 | NA     | 0.222  | -0.184 |    | -0.263 | NA     | -0.128 | -0.476 |
| A025190_01 |    | -1.87  | -2.703 | -2.815 | -2.107 |    | -2.18  | -1.735 | -1.677 | -2.197 |
| A025206_01 |    | 0.355  | 0.47   | -0.212 | -0.252 |    | 0.327  | 0.071  | 0.172  | -0.028 |
| A025211_01 |    | 0.664  | 0.135  | 0.652  | 0.366  |    | 0.484  | NA     | 0.167  | NA     |
| A025242_01 |    | 0.399  | 0.116  | 0.25   | 0.143  |    | 0.625  | 0.277  | 0.504  | 0.441  |
| A025254_01 |    | -1.139 | -0.745 | 0.306  | 0.219  |    | 0.008  | 0.12   | 0.071  | 0.153  |
| A025261_01 |    | -1.415 | NA     | 0.585  | 0.296  |    | -0.023 | -0.056 | -0.057 | -0.241 |
| A025268_01 |    | 0.177  | 0.396  | 0.339  | 0.297  |    | 1.1    | 0.699  | -0.128 | -0.312 |
| A025273_01 |    | 0.246  | 0.258  | -0.405 | -0.196 |    | 0.051  | 0.212  | 0.031  | 0.211  |
| A025274_01 |    | 0.013  | 0.03   | 0.324  | 0.151  |    | 0.598  | 0.514  | 0.216  | 0.04   |
| A025287_01 |    | -0.495 | -0.205 | -0.509 | -0.506 |    | -0.22  | NA     | 0.189  | 0.056  |
| A025301_01 | NA |        | 0.268  | 0.212  | 0.188  |    | 0.213  | -0.007 | -0.145 | -0.176 |
| A025313_01 |    | -0.163 | 0.226  | 0.939  | 0.612  |    | 0.708  | 0.596  | 0.53   | 0.279  |
| A025335_01 |    | 0.497  | 0.231  | 0.168  | 0.036  |    | 0.33   | 0.152  | 0.311  | 0.175  |
| A025341_01 |    | -1.331 | -0.951 | -0.006 | -0.082 |    | -0.654 | -0.377 | -0.237 | -0.217 |
| A025351_01 |    | -0.057 | -0.133 | -0.459 | NA     |    | 0.198  | -0.073 | NA     | NA     |
| A025353_01 |    | -0.699 | -0.768 | 0.313  | 0.303  |    | -0.224 | 0.032  | -0.206 | -0.15  |
| A025368_01 |    | -2.852 | -3.592 | -4.401 | -3.188 |    | -3.067 | -2.248 | -2.783 | -3.1   |
| A025372_01 |    | 0.24   | 0.458  | 0.156  | 0.075  |    | 0.677  | 0.755  | 0.31   | 0.423  |
| A025376_01 |    | 0.607  | 0.122  | 0.181  | 0.131  |    | 0.111  | -0.029 | 0.362  | 0.119  |
| A025393_01 |    | 0.691  | 0.469  | 0.63   | 0.288  |    | 0.611  | 0.553  | 0.918  | 0.884  |
| A025394_01 |    | -0.147 | -0.004 | -0.465 | -0.551 |    | 0.267  | 0.49   | 0.629  | 0.699  |
| A025397_01 |    | -0.756 | -0.305 | -1.431 | -1.057 | NA |        | -0.684 | -1.1   | -1.434 |
| A025403_01 |    | 0.374  | 0.388  | -0.456 | -0.283 |    | -0.104 | 0.339  | -0.241 | 0.147  |
| A025406_01 | NA | NA     |        | 0.704  | 0.692  |    | 0.788  | NA     | 0.165  | 0.24   |
| A025408_01 | NA |        | 0.034  | 0.453  | 0.476  |    | 0.48   | 0.842  | -0.133 | 0.221  |
| A025418_01 | NA | NA     |        | -0.139 | NA     |    | NA     | NA     | NA     | NA     |
| A025456_01 | NA | NA     |        | 0.424  | 0.274  |    | 0.039  | -0.149 | -0.014 | 0.009  |
| A025462_01 |    | 0.574  | 0.275  | 0.303  | 0.176  |    | 0.136  | -0.058 | -0.249 | -0.241 |
| A025468_01 |    | 0.665  | 0.586  | 0.137  | 0.109  |    | 0.171  | 0.035  | 0.083  | 0.16   |
| A025469_01 |    | 1.082  | 0.991  | -0.959 | -0.965 |    | -0.605 | -0.629 | -0.78  | -0.528 |
| A025479_01 |    | -0.289 | -0.583 | -0.651 | -0.573 |    | -0.807 | -0.748 | -0.566 | -0.617 |
| A025487_01 |    | -0.356 | -0.435 | -0.166 | -0.303 |    | -0.409 | -0.632 | 0.118  | 0.14   |
| A025502_01 |    | -0.525 | NA     | -0.33  | -0.794 |    | -1.015 | NA     | -1.02  | NA     |
| A025513_01 | NA | NA     |        | -0.028 | NA     |    | NA     | NA     | NA     | NA     |
| A025519_01 |    | 0.779  | 0.349  | 0.203  | 0.169  |    | 0.001  | -0.199 | -0.109 | NA     |
| A025522_01 |    | 0.038  | 0.092  | -0.372 | -0.414 |    | 0.158  | 0.008  | 0.355  | 0.293  |
| A025542_01 | NA | NA     |        | -0.242 | -0.705 |    | -0.338 | NA     | NA     | NA     |
| A025582_01 | NA | NA     |        | 0.305  | 0.058  | NA | NA     |        | -0.219 | -0.182 |
| A025585_01 | NA | NA     |        | 0.133  | NA     |    | NA     |        | 0.361  | NA     |
| A025587_01 | NA | NA     |        | 0.62   | 0.516  | NA | NA     |        | -0.204 | -0.183 |
| A025588_01 |    | 0.456  | 0.302  | 0.647  | 0.489  |    | 0.673  | 0.661  | 0.473  | 0.527  |
| A025590_01 |    | -0.244 | NA     | -0.192 | -0.4   |    | -0.249 | NA     | -0.252 | -0.433 |
| A025600_01 |    | 0.271  | -0.329 | 0.367  | -0.11  |    | -0.44  | -0.694 | -0.033 | -0.427 |

|            |    |           |          |           |           |           |           |           |        |
|------------|----|-----------|----------|-----------|-----------|-----------|-----------|-----------|--------|
| A025603_01 |    | 0.464     | 0.416    | -0.218    | -0.079    | -0.041    | 0.242     | 0.012     | 0.34   |
| A025613_01 |    | -0.37     | -0.121   | -0.357    | -0.481    | 0.131 NA  |           | 0.399     | 0.504  |
| A025618_01 |    | -1.276    | -1.013   | 0.151     | 0.126     | -0.33     | -0.214    | -0.019    | -0.157 |
| A025621_01 | NA | NA        |          | 0.181     | -0.002    | 0.371     | 0.469     | 0.011     | -0.077 |
| A025639_01 |    | 0.374     | 0.345    | 0.831     | 0.594     | 0.699     | 0.581     | 0.082     | 0.064  |
| A025644_01 |    | -0.568    | -0.246   | 0.123     | 0.118     | -0.29     | 0.299     | -0.083    | 0.06   |
| A025645_01 |    | -0.131    | -0.617   | -0.468    | -0.526    | -0.532    | -0.744    | -0.351    | -0.449 |
| A025683_01 |    | 1.276     | 0.948 NA |           | -0.086    | 0.876     | 0.908     | 1.081     | 1.493  |
| A025697_01 |    | -0.852    | -0.771   | -0.022    | 0.114     | -0.203 NA |           | -0.403    | -0.214 |
| A025712_01 | NA | NA        |          | 0.102     | -0.256 NA | NA        |           | 0.028     | -0.465 |
| A025718_01 | NA | NA        |          | -0.584    | -0.511    | -0.073 NA |           | -0.383    | -0.453 |
| A025719_01 |    | -0.731    | -0.425   | 0.001     | 0.022     | -0.628    | -0.704    | -0.559    | -0.501 |
| A025727_01 |    | 0.986     | 1.137    | -0.068    | 0.085     | 0.434     | 0.868     | 0.583     | 1.099  |
| A025728_01 | NA |           | 0.162    | -0.828 NA | NA        |           | -0.659    | -0.85 NA  |        |
| A025730_01 |    | 0.265     | 0.092    | -0.229 NA |           | 0.039     | -0.154 NA | NA        |        |
| A025733_01 |    | 0.257     | 0.222    | -0.394    | -0.636    | -0.898    | -0.706    | -0.534    | -0.565 |
| A025735_01 |    | -0.412    | -0.213   | -0.063    | -0.167    | -0.091    | -0.056    | 0.184     | 0.116  |
| A025739_01 |    | -0.082    | 0.223    | 0.663     | 0.37      | 0.953     | 1.018     | 0.64      | 0.674  |
| A025740_01 | NA |           | 0.268    | 0.397     | 0.345     | 0.53      | 1.582     | 0.558     | 1.179  |
| A025747_01 |    | -0.915 NA |          | 0.535     | 0.428     | 0.305     | 0.415     | 0.126     | 0.11   |
| A025758_01 | NA | NA        |          | 0.363     | 0.155 NA  | NA        |           | -0.13     | -0.347 |
| A025759_01 |    | -0.892 NA |          | 0.717     | 0.735     | -0.852    | -0.616    | -0.969    | -0.896 |
| A025762_01 | NA | NA        |          | 0.261     | 0.113 NA  | NA        |           | -0.621 NA |        |
| A025765_01 |    | -0.368    | -0.327   | 0.236     | 0.088     | -0.26     | 0.034     | -0.415    | -0.511 |
| A025767_01 |    | 0.255     | 0.676    | -0.274    | -0.149    | -0.034    | 0.503     | -0.104    | 0.452  |
| A025768_01 |    | 0.231     | 0.057    | 0.117     | -0.002    | 0.823     | 0.632     | 0.575     | 0.594  |
| A025769_01 |    | -1.368 NA |          | 0.732     | 0.657     | -0.506    | -0.518    | -0.323    | -0.389 |
| A025770_01 |    | 0.678     | 0.509    | 0.574     | 0.386     | 0.472     | 0.34      | 0.313     | 0.313  |
| A025772_01 |    | -0.403    | -0.197   | -0.181    | 0.019     | -2.352    | -2.075    | -1.323    | -1.129 |
| A025776_01 |    | -0.048 NA |          | -0.498    | -0.471    | -0.589    | -0.672    | -0.694    | -0.733 |
| A025777_01 | NA | NA        |          | 0.686     | 0.557 NA  | NA        |           | -0.33     | -0.278 |
| A025778_01 |    | -0.916 NA |          | 0.006     | 0.164     | 0.166     | 0.26      | 0.437     | 0.554  |
| A025780_01 |    | 0.847 NA  |          | 0.521     | 0.242     | 0.162 NA  |           | -0.043 NA |        |
| A025785_01 |    | -0.352    | -0.216   | 0.009     | -0.201    | 0.035     | -0.016    | 0.169     | -0.168 |
| A025787_01 |    | -0.201    | 0.141    | 0.445     | 0.304     | 0.889     | 0.932     | 0.979     | 0.833  |
| A025788_01 |    | 0.233     | 0.554    | 0.179     | 0.224     | -0.165    | 0.478     | 0.503     | 0.596  |
| A025795_01 |    | 0.505     | 0.435    | 0.106     | 0.022     | -0.224    | -0.374    | -0.732    | -0.666 |
| A025798_01 |    | -1.002    | -0.86    | 0.407     | 0.222     | -0.47     | -0.257    | -0.745    | -0.586 |
| A025799_01 |    | -0.755    | -0.098   | -0.142    | -0.101    | -0.401    | 0.031     | 0.465     | 0.483  |
| A025803_01 |    | 0.171     | 0.059    | -0.452    | -0.575    | -0.165    | -0.172    | -0.386    | -0.604 |
| A025804_01 |    | -0.567    | -0.377   | 0.268     | 0.093     | -0.25     | -0.403    | -0.086    | -0.234 |
| A025807_01 | NA | NA        |          | 0.016     | 0.574 NA  | NA        |           | -0.425 NA |        |
| A025814_01 | NA |           | -1.07    | -0.38     | -0.265 NA |           | -0.993    | -0.355    | -0.438 |
| A025818_01 |    | 0.357     | 0.306    | -0.097    | -0.121    | 0.344     | 0.297     | 0.09      | 0.021  |
| A025825_01 | NA |           | 0.204 NA |           | 0.057 NA  |           | 0.536     | 0.344     | 0.384  |
| A025827_01 |    | -0.406    | -0.164   | 0.452     | 0.24      | 0.2       | -0.013    | 0.077     | -0.133 |
| A025828_01 | NA | NA        |          | 0.236     | 0.239 NA  | NA        |           | -0.324    | -0.218 |
| A025844_01 |    | -1.438    | -0.936   | -0.47     | -0.462    | -0.994    | -0.885    | -0.582    | -0.727 |
| A025846_01 | NA | NA        |          | 0.302     | 0.258 NA  | NA        |           | -0.643    | -0.79  |
| A025847_01 |    | -1.84     | -1.672   | 0.018     | -0.145    | -0.562    | -0.624    | -0.751    | -1.033 |
| A025849_01 | NA | NA        |          | -0.362    | -0.392 NA | NA        |           | -0.015    | -0.131 |
| A025861_01 |    | -0.009 NA |          | 0.498     | 0.433     | 0.966     | 0.742     | 0.541     | 0.586  |
| A025867_01 | NA | NA        |          | 0.19      | 0.118 NA  | NA        | NA        |           | -0.671 |
| A025868_01 |    | 0.04      | 0.158    | -0.811    | -0.54     | -0.97     | -0.556    | -0.154    | 0.095  |
| A025869_01 |    | 0.061     | 0.211    | 0.021     | 0.106     | 0.62      | 0.723     | 1.066     | 1.118  |
| A025870_01 |    | -0.715    | -0.664   | -0.354    | -0.302    | -0.791    | -0.538    | -0.288    | -0.442 |
| A025872_01 |    | 0.261     | -0.178   | 0.316     | 0.285     | 0.446     | -0.297    | 0.148     | 0.137  |
| A025873_01 | NA | NA        |          | 0.466     | 0.595 NA  |           | 0.225     | 0.146     | 0.394  |
| A025874_01 | NA | NA        |          | 0.338     | 0.153 NA  | NA        | NA        |           | -0.046 |
| A025878_01 |    | 0.334     | 0.344    | -0.192    | -0.23     | 0.271     | 0.194     | 0.639     | 0.409  |
| A025887_01 |    | 0.303     | 0.286    | -0.007    | 0.135     | -0.332    | 0.03      | 0.145     | 0.354  |
| A025896_01 |    | 0.859     | 0.69     | -0.027    | 0.298     | 0.009     | 0.219     | 0.145     | 0.168  |
| A025899_01 |    | -0.303    | -0.174   | -0.197    | -0.057    | -0.3      | -0.069    | -0.075    | 0.16   |
| A025900_01 |    | -0.702    | -0.615   | -0.872    | -1.194    | -0.884    | -0.572    | -0.4      | -0.442 |
| A025901_01 |    | -0.738    | -0.328   | -0.154    | -0.069    | -0.46     | -0.068    | -0.057    | 0.046  |
| A025908_01 |    | -0.25     | -0.215   | 0.13      | 0.085     | 0.007     | 0.063     | -0.064    | -0.154 |
| A025909_01 |    | -0.22     | -0.232   | 0.444     | 0.117     | 0.255     | 0.235     | 0.373     | 0.128  |
| A025910_01 |    | -0.306    | 0.143    | -0.622    | -0.632    | -0.54     | -0.485    | -0.231    | -0.224 |



|            |    |        |        |        |        |        |        |        |        |
|------------|----|--------|--------|--------|--------|--------|--------|--------|--------|
| A025911_01 |    | -1.502 | -2.385 | -0.401 | -0.41  | 0.545  | 0.958  | 1.741  | 1.918  |
| A025916_01 |    | -0.902 | -0.539 | 0.561  | 0.366  | 0.01   | 0.115  | 0.125  | -0.133 |
| A025918_01 |    | -0.195 | 0.064  | 0.154  | 0.074  | -0.049 | -0.037 | 0.107  | 0.156  |
| A025920_01 |    | -0.446 | -0.025 | -0.2   | 0.01   | -0.122 | 0.078  | 0.232  | 0.33   |
| A025922_01 |    | 0.047  | 0.229  | 0.054  | -0.054 | 0.378  | 0.487  | 0.756  | 0.561  |
| A025924_01 |    | -0.153 | 0.116  | 0.235  | 0.271  | 0.506  | 0.311  | 0.393  | 0.423  |
| A025929_01 |    | -0.789 | -0.893 | -0.248 | -0.378 | -0.339 | -0.341 | -0.937 | -1.277 |
| A025931_01 | NA | NA     |        | 0.663  | 0.523  | NA     | NA     | -0.39  | -0.397 |
| A025937_01 |    | 0.328  | 0.427  | 0.743  | 0.451  | 0.272  | 0.122  | 0.464  | 0.278  |
| A025939_01 |    | 0.425  | 0.298  | -0.036 | -0.033 | -0.167 | 0.087  | 0.1    | 0.012  |
| A025941_01 |    | -1.133 | -0.685 | -0.018 | -0.126 | -0.872 | -0.505 | 0.058  | -0.052 |
| A025942_01 |    | 0.396  | 0.45   | 0.051  | 0.109  | -0.408 | -0.376 | -0.671 | -0.688 |
| A025944_01 | NA | NA     |        | 0.105  | 0.167  | NA     | NA     | NA     | 0.181  |
| A025947_01 |    | 1.028  | 0.727  | -0.308 | -0.13  | 0.549  | 0.425  | -0.24  | -0.247 |
| A025949_01 |    | -0.031 | 0.291  | 0.284  | 0.255  | -0.535 | 0.097  | 0.44   | 0.308  |
| A025951_01 |    | -0.175 | -0.129 | -0.28  | -0.256 | -0.539 | -0.332 | 0.019  | 0.216  |
| A025956_01 |    | -0.952 | -0.358 | 0.209  | 0.28   | -0.667 | -0.281 | 0.087  | 0.113  |
| A025957_01 |    | -1.679 | -1.932 | 0.112  | 0.182  | -1.136 | -0.957 | -0.592 | -0.562 |
| A025958_01 | NA |        | -0.316 | -0.547 | -0.492 | -0.31  | NA     | -0.406 | -0.481 |
| A025959_01 |    | -0.786 | -0.236 | 0.233  | 0.201  | -0.249 | -0.22  | -0.201 | -0.199 |
| A025961_01 |    | 0.275  | 0.466  | 0.476  | 0.413  | 0.536  | 1.086  | 0.489  | 0.713  |
| A025962_01 |    | -1.242 | -0.731 | 0.379  | 0.415  | -0.32  | -0.032 | -0.089 | -0.174 |
| A025963_01 |    | -0.94  | -0.434 | 0.23   | 0.123  | 0.101  | 0.118  | -0.125 | -0.077 |
| A025965_01 | NA | NA     |        | 0.232  | 0.168  | -0.404 | NA     | 0.105  | 0.14   |
| A025969_01 |    | -0.784 | -0.825 | -0.855 | -0.563 | -1.252 | -0.744 | -0.596 | -0.383 |
| A025970_01 |    | -0.866 | -0.373 | -0.215 | -0.112 | -0.47  | -0.013 | 0.004  | -0.036 |
| A025971_01 |    | -1.636 | -0.936 | -0.197 | -0.227 | -0.268 | -0.199 | -0.023 | -0.102 |
| A025975_01 | NA | NA     |        | 0.222  | 0.165  | NA     | NA     | 0.661  | 0.563  |
| A025978_01 |    | -0.481 | NA     | 0.24   | 0.165  | -0.769 | -0.642 | -0.471 | -0.766 |
| A025984_01 |    | -0.368 | -0.8   | -0.177 | NA     | -1.571 | -1.496 | -1.089 | -1.109 |
| A025986_01 |    | -0.38  | -0.194 | 0.03   | 0.12   | 0.02   | 0.124  | 0.353  | 0.326  |
| A025990_01 |    | -1.1   | -0.672 | -0.658 | -0.428 | -0.641 | -0.385 | -0.075 | -0.324 |
| A025991_01 |    | 0.5    | 0.385  | 0.1    | 0.146  | 0.657  | 0.625  | -0.019 | 0.074  |
| A025992_01 |    | -0.278 | 0.163  | -0.021 | -0.154 | -0.132 | 0.144  | 0.855  | 0.634  |
| A025995_01 | NA | NA     |        | 0.282  | -0.024 | 0.154  | 0.006  | -0.043 | -0.236 |
| A025997_01 |    | -0.883 | NA     | 0.561  | 0.345  | 0.052  | 0.193  | 0.145  | 0.021  |
| A025998_01 |    | -1.206 | -0.707 | 0.418  | 0.411  | -0.021 | 0.421  | 0.178  | 0.219  |
| A026002_01 | NA |        | -1.522 | -0.046 | -0.13  | -0.478 | -0.589 | -0.946 | -1.179 |
| A026004_01 |    | -0.316 | 0.14   | 0.158  | 0.168  | 0.372  | 0.564  | 0.309  | 0.492  |
| A026013_01 | NA | NA     |        | 0.013  | NA     | NA     | NA     | -0.528 | -0.369 |
| A026014_01 |    | -0.319 | -0.156 | -0.389 | -0.212 | -0.222 | -0.203 | -0.094 | -0.085 |
| A026015_01 |    | -1.295 | -1.079 | -0.028 | 0.005  | -0.609 | -0.589 | -0.05  | 0.048  |
| A026017_01 |    | -0.909 | -0.409 | 0.116  | 0.037  | -0.111 | 0.056  | 0.348  | 0.108  |
| A026024_01 | NA |        | -0.417 | -0.226 | -0.297 | -0.113 | -0.066 | -0.116 | -0.025 |
| A026026_01 | NA | NA     |        | 0.027  | 0.197  | NA     | NA     | 0.412  | 0.388  |
| A026043_01 |    | -0.704 | -0.09  | 0.412  | 0.207  | -0.398 | 0.189  | 0.182  | 0.132  |
| A026057_01 |    | 0.22   | 0.175  | -0.238 | -0.321 | 0.357  | 0.203  | 0.259  | 0.185  |
| A026062_01 | NA |        | 0.385  | -0.281 | -0.258 | 0.646  | 0.279  | 0.446  | 0.37   |
| A026078_01 | NA |        | -1.138 | 0.552  | 0.371  | -0.191 | -0.175 | -0.114 | -0.331 |
| A026081_01 |    | -0.521 | -0.294 | -0.137 | 0.003  | -0.303 | -0.383 | -0.539 | -0.415 |
| A026082_01 |    | 0.769  | 0.602  | 0.308  | 0.225  | 0.671  | 0.66   | 0.539  | 0.632  |
| A026083_01 |    | 0.071  | 0.304  | 0.108  | 0.12   | 0.243  | 0.207  | 0.135  | 0.412  |
| A026086_01 | NA | NA     |        | 0.325  | 0.281  | NA     | NA     | -0.036 | -0.067 |
| A026087_01 |    | 0.618  | 0.401  | -0.544 | -0.51  | 0.52   | 0.352  | 0.046  | 0.252  |
| A026089_01 | NA |        | -1.133 | 0.232  | 0.139  | NA     | -1.175 | -0.743 | -0.857 |
| A000178_01 | NA | NA     |        | -0.874 | NA     | NA     | NA     | NA     | NA     |
| A000194_01 | NA |        | 0.557  | -0.052 | NA     | NA     | NA     | NA     | NA     |
| A000195_01 |    | 0.126  | 0.239  | -0.122 | NA     | NA     | NA     | NA     | 0.33   |
| A000463_01 | NA | NA     |        | 0.086  | 0.354  | NA     | NA     | -0.083 | 0.285  |
| A000605_01 | NA |        | -0.002 | -0.795 | NA     | NA     | NA     | NA     | NA     |
| A000683_01 | NA | NA     |        | -0.022 | NA     | NA     | NA     | NA     | 0.531  |
| A000724_01 | NA |        | 0.123  | -0.218 | NA     | -0.253 | NA     | NA     | NA     |
| A000790_01 |    | 1.352  | 1.066  | 0.015  | 0.302  | 0.519  | 0.899  | 0.846  | 1.366  |
| A000902_01 |    | -0.011 | 0.091  | -0.092 | 0.225  | 0.311  | NA     | -0.175 | -0.077 |
| A000979_01 |    | 0.539  | 0.514  | -0.229 | 0.525  | 0.058  | NA     | NA     | 0.524  |
| A001111_01 |    | 0.483  | NA     | -0.397 | NA     | NA     | NA     | -0.09  | 0.621  |
| A001151_01 | NA |        | 0.721  | 0.348  | 0.372  | 0.573  | NA     | NA     | 0.141  |
| A001316_01 |    | 0.77   | 0.363  | -0.654 | -0.397 | -0.54  | -0.392 | -0.545 | -0.443 |

|               |           |          |           |           |           |           |           |        |
|---------------|-----------|----------|-----------|-----------|-----------|-----------|-----------|--------|
| A001383_01    | 0.29      | 0.173    | -0.374 NA |           | -0.159 NA | NA        | NA        |        |
| A001433_01    | 0.074     | 0.131    | -0.292    | -0.092    | -0.427    | -0.137    | 0.242     | 0.209  |
| A001509_01    | 0.798 NA  |          | -0.204    | 0.443     | -0.209 NA |           | 0.146 NA  |        |
| A001594_01 NA | NA        |          | -0.223    | -0.065    | 0.135     | 0.207     | 0.087 NA  |        |
| A001600_01    | 0.458     | 0.731    | -0.158    | 0.166     | 0.277     | 0.527     | 0.305     | 0.342  |
| A001888_01 NA | NA        |          | -0.412 NA |           | -0.632 NA | NA        | NA        |        |
| A002042_01    | 0.061 NA  |          | -0.248 NA |           | -0.378 NA | NA        | NA        |        |
| A002060_01    | 0.03 NA   |          | 0.392     | 0.315     | -0.415 NA |           | -0.103    | -0.256 |
| A002084_01    | 0.725     | 0.804 NA | NA        |           | 0.909     | 1.015     | 1.016     | 0.961  |
| A002107_01 NA | NA        |          | 0.299     | 0.348 NA  | NA        | NA        |           | -0.529 |
| A002404_01    | 0.536     | 0.637    | 0.025     | 0.353 NA  | NA        | NA        |           | 0.409  |
| A002434_01 NA | NA        |          | -0.071    | 0.086 NA  | NA        | NA        |           | 0.122  |
| A002621_01 NA | NA        |          | -0.322 NA | NA        | NA        | NA        |           | 0.677  |
| A002778_01    | 0.099     | 0.537    | -0.089 NA |           | 0.68 NA   | NA        |           | 0.548  |
| A002947_01    | -0.136    | 0.076    | -0.742    | -0.361    | -0.443    | -0.269    | 0         | 0.311  |
| A003123_01    | 0.758     | 0.973    | -0.061 NA | NA        | NA        | NA        | NA        |        |
| A003140_01    | 0.873     | 0.928    | 0.198     | 0.389     | 0.341 NA  | NA        |           | 0.534  |
| A003218_01 NA | NA        |          | -0.133    | -0.092 NA | NA        | NA        |           | -0.246 |
| A003526_01    | 1.143     | 0.9      | -0.195    | 0.007     | 0.865     | 1.17      | 1.397     | 1.543  |
| A003659_01 NA | NA        |          | -0.374    | -0.364 NA | NA        |           | -0.216 NA |        |
| A003766_01    | 1.202 NA  | NA       | NA        |           | -0.343 NA |           | -0.222 NA |        |
| A003859_01 NA | NA        |          | -1.655    | -1.06 NA  | NA        |           | -0.901    | -1.291 |
| A004129_01 NA | NA        |          | -1.11     | -0.724 NA | NA        |           | -0.803    | -0.587 |
| A004135_01    | -0.95 NA  |          | 0.307     | 0.405     | -0.727 NA |           | -0.319    | -0.168 |
| A004159_01    | -0.652 NA |          | 0.108     | 0.198     | -0.274 NA |           | -0.361    | -0.154 |
| A004334_01    | 0.676     | 0.48     | 0.001     | 0.111 NA  | NA        | NA        | NA        |        |
| A004387_01 NA | NA        |          | -0.175    | 0.071     | 0.122 NA  |           | -0.016    | 0.143  |
| A004423_01    | -0.159    | -0.048   | 0.151     | 0.153     | -0.065 NA | NA        |           | 0.109  |
| A004572_01    | 0.674 NA  |          | -0.37     | -0.239    | 0.377     | 0.374     | 0.458     | 0.459  |
| A004660_01 NA | NA        |          | -0.602    | -0.308 NA | NA        | NA        | NA        |        |
| A004672_01    | -0.346    | 0.336    | -0.318    | -0.099    | -0.512 NA | NA        |           | -0.222 |
| A004702_01 NA | NA        |          | 0.198     | 0.251 NA  | NA        |           | -0.222    | -0.227 |
| A004773_01 NA |           | 0.337    | 0.015 NA  |           | -0.185 NA |           | 0.055     | 0.294  |
| A005189_01 NA |           | -0.585   | -0.462    | -0.345 NA | NA        | NA        |           | -1.114 |
| A005374_01 NA | NA        |          | 0.111 NA  | NA        | NA        | NA        | NA        |        |
| A005392_01    | 1.719     | 1.524    | 0.776     | 0.757     | 0.633     | 0.839     | 0.786     | 1.167  |
| A005515_01    | 0.384     | 0.256    | -0.34     | -0.145    | 0.013     | 0.026 NA  |           | 0.23   |
| A005561_01 NA | NA        |          | 0.235     | 0.103 NA  |           | -0.01     | -0.018    | -0.217 |
| A005682_01    | 0.9       | 0.457    | 0.148     | 0.356     | 0.388 NA  | NA        |           | 0.547  |
| A005848_01 NA | NA        |          | -0.124    | -0.082 NA | NA        |           | -0.697    | -0.589 |
| A006047_01 NA | NA        |          | -0.426 NA | NA        | NA        |           | -0.078    | 0.204  |
| A006139_01 NA | NA        |          | -0.226    | -0.32 NA  | NA        |           | -0.736    | -0.965 |
| A006166_01    | 0.801     | 0.778    | -1.152    | -0.866    | 1.876     | 1.543     | 1.346     | 1.456  |
| A006192_01 NA | NA        |          | 0.037     | 0.489 NA  | NA        | NA        |           | 0.451  |
| A006198_01 NA |           | -0.386   | 0.106     | 0.077 NA  | NA        | NA        |           | -0.844 |
| A006299_01 NA | NA        |          | 0.697     | 0.525     | 0.58 NA   |           | 0.45      | 0.412  |
| A006359_01    | 0.712     | 0.714    | -0.062 NA |           | 0.363 NA  |           | 0.255 NA  |        |
| A006535_01 NA | NA        |          | -0.06     | 0.15 NA   | NA        | NA        |           | -0.135 |
| A006561_01 NA |           | 0.595    | -0.243 NA | NA        |           | 0.569 NA  | NA        |        |
| A006584_01    | 0.907     | 0.811    | -0.3 NA   |           | 0.716 NA  | NA        |           | 0.971  |
| A006587_01 NA |           | 0.503    | -0.03 NA  | NA        |           | 0.585 NA  |           | 0.563  |
| A006588_01 NA |           | 0.499    | 0.094     | 0.173 NA  | NA        | NA        |           | 0.449  |
| A006590_01 NA | NA        |          | 0.106     | 0.127 NA  | NA        | NA        |           | 0.042  |
| A006602_01 NA | NA        |          | -0.133    | 0.125 NA  | NA        | NA        |           | 0.357  |
| A006638_01 NA |           | 0.346    | 0.507     | 0.497     | 0.567 NA  |           | 0.257     | 0.256  |
| A006655_01 NA |           | 0.02 NA  | NA        | NA        | NA        | NA        | NA        |        |
| A006661_01 NA |           | -0.034   | 0.024     | -0.053 NA | NA        | NA        | -0.332    | -0.323 |
| A006741_01 NA |           | 0.382    | 0.137     | -0.038 NA | NA        |           | 0.16 NA   |        |
| A006970_01 NA |           | 0.045    | -0.569    | -0.391 NA |           | -0.777 NA |           | -0.537 |
| A007125_01 NA |           | 0.753    | -0.572    | 0.627 NA  |           | 0.878 NA  |           | 0.469  |
| A007270_01    | -0.357    | -0.058   | 0.269     | 0.156     | 0.306     | 0.303     | 0.294     | 0.162  |
| A007326_01    | -0.058    | 0.391    | -0.214    | 0.161     | -0.18 NA  |           | -0.127    | 0.269  |
| A007344_01 NA |           | -0.142   | 0.077     | 0.184     | 0.252 NA  | NA        |           | 0.269  |
| A007439_01    | 0.039     | 0.33     | 0.113 NA  |           | -0.007 NA | NA        | NA        |        |
| A007540_01    | 0.882     | 0.771    | -0.839    | -0.686 NA | NA        | NA        |           | -0.902 |
| A007611_01 NA | NA        |          | 0.102 NA  | NA        | NA        | NA        | NA        |        |
| A007679_01    | 0.566     | 0.639    | -0.518 NA |           | -0.014 NA | NA        |           | 0.68   |
| A007700_01 NA | NA        |          | -0.168 NA | NA        | NA        | NA        | NA        |        |

|            |    |        |        |        |        |        |        |        |        |
|------------|----|--------|--------|--------|--------|--------|--------|--------|--------|
| A007742_01 | NA |        | -0.027 | -1.212 | -0.833 | -0.23  | NA     | -0.642 | -0.87  |
| A007802_01 | NA |        | 0.415  | -0.227 | NA     |        | NA     | 0.02   | NA     |
| A007819_01 | NA |        | 0.282  | -0.04  | 0.095  | NA     | NA     | -0.011 | 0.118  |
| A007828_01 | NA | NA     |        | 0.058  | 0.247  | NA     | NA     | -0.57  | -0.5   |
| A007839_01 | NA | NA     |        | -1.015 | -0.862 | NA     | NA     | -0.89  | NA     |
| A007867_01 | NA |        | -0.159 | 0.329  | 0.254  | NA     | NA     | -0.224 | -0.332 |
| A007882_01 | NA | NA     |        | 0.002  | -0.005 | NA     | NA     | -0.138 | NA     |
| A007997_01 |    | 0.438  | NA     | 0.04   | 0.043  | 0.247  | NA     | 0.044  | -0.139 |
| A008030_01 | NA | NA     |        | 0.229  | 0.207  | NA     | NA     | -0.776 | -0.83  |
| A008034_01 | NA | NA     |        | 0.324  | 0.165  | NA     | NA     | -0.106 | -0.346 |
| A008278_01 | NA | NA     |        | -0.389 | NA     | NA     | NA     | 0.172  | 0.277  |
| A008284_01 |    | 1.097  | 0.787  | 0.486  | 0.557  | 0.554  | 0.373  | -0.037 | 0.052  |
| A008609_01 | NA |        | 0.368  | -0.3   | NA     | NA     | NA     | NA     | NA     |
| A008620_01 | NA | NA     |        | -0.534 | NA     | NA     | NA     | NA     | NA     |
| A008712_01 | NA |        | -1.018 | -0.037 | -0.05  | NA     | 0.237  | 0.438  | 0.43   |
| A008935_01 | NA | NA     |        | -0.933 | -0.675 | NA     | NA     | NA     | -1.08  |
| A009025_01 |    | 1.021  | 1.16   | -0.324 | NA     | -0.114 | NA     | NA     | NA     |
| A009197_01 | NA |        | 0.128  | 0.112  | NA     | 0.314  | NA     | NA     | NA     |
| A009232_01 | NA | NA     |        | -0.3   | NA     | NA     | NA     | -0.863 | -0.958 |
| A009254_01 |    | 0.314  | 0.084  | -0.402 | -0.215 | -0.371 | -0.455 | -0.384 | -0.178 |
| A009259_01 |    | 1.427  | 1.134  | 0.407  | 0.468  | 0.869  | 0.611  | 0.291  | 0.444  |
| A009332_01 |    | 1.121  | 1.028  | -0.137 | -0.034 | -0.459 | -0.604 | -1.018 | -0.889 |
| A009654_01 | NA |        | 0.154  | 0.262  | 0.1    | 0.38   | NA     | 0.267  | 0.123  |
| A009749_01 |    | 0.125  | 0.131  | 0.138  | 0.154  | 0.191  | NA     | NA     | 0.001  |
| A009945_01 |    | 0.469  | NA     | 0.281  | 0.226  | NA     | NA     | -0.286 | -0.261 |
| A010046_01 |    | 0.559  | 0.077  | -0.218 | NA     | -0.012 | NA     | -0.326 | 0.015  |
| A010070_01 | NA |        | -0.347 | NA     | NA     | -0.324 | NA     | NA     | NA     |
| A010280_01 | NA | NA     |        | 0.483  | 0.324  | NA     | NA     | 0.164  | 0.015  |
| A010408_01 |    | 0.226  | 0.021  | 0.103  | NA     | 0.334  | NA     | NA     | NA     |
| A010432_01 |    | 0.322  | 0.053  | 0.06   | NA     | NA     | NA     | NA     | NA     |
| A010479_01 |    | 0.615  | 0.338  | -0.678 | NA     | NA     | NA     | NA     | NA     |
| A010550_01 | NA | NA     |        | 0.503  | 0.372  | NA     | NA     | -0.134 | -0.318 |
| A010630_01 | NA |        | 0.33   | -0.039 | NA     | NA     | NA     | -0.056 | NA     |
| A010702_01 | NA | NA     |        | -0.971 | -0.89  | NA     | NA     | -0.696 | -0.797 |
| A010770_01 | NA |        | -0.697 | -0.08  | -0.1   | 0.865  | 0.801  | 0.728  | 0.645  |
| A010800_01 |    | 0.59   | 0.278  | 0.089  | 0.229  | 0.205  | NA     | NA     | 0.365  |
| A010889_01 |    | 0.579  | NA     | 0.262  | 0.138  | NA     | NA     | NA     | NA     |
| A010924_01 | NA | NA     |        | 0.24   | 0.018  | NA     | NA     | -0.292 | NA     |
| A010967_01 |    | 1.414  | 1.323  | -0.75  | -0.863 | 1.37   | 1.26   | 1.69   | 2.07   |
| A010984_01 |    | 0.418  | 0.355  | 0.271  | 0.03   | 0.12   | NA     | 0.186  | -0.011 |
| A010986_01 |    | -0.07  | 0.091  | -0.102 | 0.123  | -0.243 | 0.152  | -0.038 | 0.238  |
| A011239_01 | NA |        | -0.323 | -0.134 | -0.104 | NA     | NA     | -0.356 | -0.459 |
| A011702_01 |    | 1.25   | 1.158  | 0.507  | 0.411  | 0.566  | 0.279  | 0.169  | NA     |
| A011934_01 |    | 0.646  | 0.177  | -0.137 | NA     | NA     | NA     | NA     | NA     |
| A011958_01 | NA | NA     |        | 0.331  | 0.167  | NA     | NA     | -0.069 | -0.222 |
| A012029_01 |    | -0.152 | -0.311 | -0.936 | -0.731 | -0.185 | NA     | -0.431 | -0.626 |
| A012053_01 |    | 0.782  | 0.609  | -0.322 | -0.27  | 0.393  | 0.231  | 0.594  | 0.547  |
| A012261_01 | NA |        | 0.577  | 0.257  | 0.148  | NA     | 0.158  | 0.142  | 0.197  |
| A012345_01 | NA | NA     |        | 0.014  | -0.076 | NA     | NA     | 0.135  | 0.032  |
| A012409_01 | NA | NA     |        | 0.135  | NA     | NA     | NA     | NA     | 0.254  |
| A012427_01 | NA |        | -0.547 | -0.121 | 0.062  | -0.48  | NA     | NA     | -0.113 |
| A012433_01 |    | 0.489  | NA     | -0.402 | -0.108 | -0.172 | NA     | 0.569  | 0.799  |
| A012676_01 |    | 0.105  | -0.065 | -1.316 | -0.979 | -0.521 | NA     | -0.766 | -0.787 |
| A012743_01 | NA | NA     |        | 0.059  | NA     | NA     | NA     | 0.186  | 0.076  |
| A013121_01 | NA | NA     |        | 0.699  | 0.494  | 0.785  | NA     | NA     | 0.444  |
| A013400_01 | NA | NA     |        | -0.069 | 0.013  | NA     | NA     | NA     | -0.193 |
| A013826_01 |    | -0.036 | -0.126 | 0.215  | 0.09   | 0.105  | 0.144  | 0.065  | 0.013  |
| A014261_01 | NA | NA     |        | 0.288  | 0.103  | NA     | NA     | 0.217  | -0.043 |
| A014327_01 |    | 1.189  | 0.901  | 0.079  | 0.002  | 0.972  | NA     | 0.396  | 0.268  |
| A014482_01 | NA | NA     |        | 0.2    | NA     | NA     | NA     | 0.048  | NA     |
| A015221_01 | NA | NA     |        | -0.172 | -0.231 | NA     | NA     | -0.283 | -0.193 |
| A015419_01 | NA | NA     |        | -1.285 | -1.147 | NA     | NA     | NA     | NA     |
| A015597_01 | NA | NA     |        | -0.396 | NA     | NA     | NA     | NA     | NA     |
| A015680_01 | NA | NA     |        | -0.268 | -0.258 | NA     | NA     | NA     | NA     |
| A015726_01 | NA |        | 0.487  | -0.125 | NA     | NA     | 0.22   | NA     | 0.316  |
| A015821_01 | NA | NA     |        | 0.546  | 0.29   | NA     | NA     | 0.052  | -0.192 |
| A015829_01 | NA |        | -0.207 | 0.121  | NA     | NA     | NA     | NA     | NA     |
| A016078_01 | NA | NA     |        | -0.248 | NA     | NA     | NA     | NA     | -0.277 |

|               |           |           |           |           |           |          |           |        |
|---------------|-----------|-----------|-----------|-----------|-----------|----------|-----------|--------|
| A016171_01    | 1.563     | 1.433     | 0.277     | 0.301     | 0.32      | 0.456    | 0.369     | 0.71   |
| A016256_01    | 0.753 NA  |           | -0.194    | -0.496 NA | NA        |          | -0.141    | -0.387 |
| A016280_01    | 0.133 NA  |           | 0.146 NA  |           | 0.112 NA  | NA       | NA        |        |
| A016737_01 NA |           | -0.914    | -0.399    | -0.264 NA |           | -0.8     | -0.799    | -0.665 |
| A016743_01 NA | NA        |           | -0.237    | -0.243 NA | NA        | NA       |           | -1.04  |
| A016766_01    | 1.562     | 1.128     | 0.473     | 0.33 NA   | NA        | NA       | NA        |        |
| A016874_01 NA | NA        |           | -0.325    | -0.566 NA | NA        | NA       | NA        |        |
| A016906_01    | 1.167     | 0.604     | -0.919    | -1.013    | 0.705     | 0.322    | 1.035     | 0.894  |
| A016921_01    | 0.628     | 0.385     | 0.693     | 0.647     | 0.633 NA  | NA       |           | 0.391  |
| A016963_01 NA | NA        |           | 0.098 NA  | NA        | NA        | NA       |           | 0.064  |
| A017319_01    | 0.301     | 0.484     | 0.041     | 0.009     | 1.008     | 0.74     | 0.88      | 0.675  |
| A017543_01 NA | NA        |           | 0.427     | 0.455 NA  | NA        |          | 0.005     | 0.08   |
| A017592_01 NA | NA        |           | 0.32      | 0.357 NA  | NA        |          | -0.339    | -0.324 |
| A017615_01 NA | NA        |           | -0.251    | -0.227 NA | NA        |          | -0.034    | -0.162 |
| A017639_01 NA | NA        |           | -0.011    | -0.068 NA | NA        |          | -0.396    | -0.445 |
| A017675_01 NA |           | -0.622    | -0.946 NA |           | -0.57 NA  | NA       | NA        |        |
| A017696_01 NA |           | 0.577     | 0.635     | 0.586 NA  |           | 0.4      | 0.337     | 0.444  |
| A017708_01 NA | NA        |           | 0.365 NA  |           | 0.549 NA  |          | 0.703     | 0.577  |
| A018180_01 NA | NA        |           | -1.269 NA | NA        | NA        | NA       | NA        |        |
| A018346_01    | 0.767     | 0.4       | 0.051 NA  | NA        | NA        | NA       | NA        |        |
| A018376_01 NA | NA        |           | 0.514     | 0.26 NA   | NA        |          | -0.067    | 0.013  |
| A018459_01    | 0.433     | 0.164     | 0.257 NA  |           | 0.464 NA  |          | 0.51      | 0.354  |
| A018525_01    | 0.751 NA  |           | 0.475 NA  |           | 0.324 NA  |          | -0.009 NA |        |
| A018642_01 NA | NA        |           | -0.813    | -0.785 NA | NA        |          | -0.186    | -0.772 |
| A018791_01 NA |           | -0.357    | -0.217    | -0.18 NA  |           | -0.19    | -0.11     | -0.02  |
| A018839_01    | 0.103     | 0.202     | -0.104 NA |           | 0.196 NA  | NA       |           | -0.05  |
| A019083_01 NA |           | 0.245     | 0.404     | 0.121     | 0.047 NA  |          | 0.165     | 0.023  |
| A019129_01 NA |           | 0.027     | -0.065    | -0.207 NA | NA        | NA       |           | -0.188 |
| A019148_01    | 0.552     | 0.507     | 0.184     | 0.132     | 0.332     | 0.122    | 0.079     | -0.094 |
| A019207_01    | 0.639     | 0.475     | 0.524 NA  |           | 0.352 NA  | NA       |           | 0.175  |
| A019260_01 NA |           | 0.236     | 0.281     | 0.19 NA   |           | 0.155    | 0.228     | 0.127  |
| A019316_01 NA | NA        |           | 0.421     | 0.276 NA  | NA        |          | 0.246     | 0.014  |
| A019339_01 NA | NA        |           | 0.257     | 0.212 NA  | NA        |          | 0.06      | -0.202 |
| A019441_01 NA |           | 0.477     | 0.021     | 0.045 NA  |           | 0.567    | 0.176     | 0.497  |
| A019481_01 NA | NA        |           | 0.21      | 0.211 NA  | NA        |          | -0.348    | -0.464 |
| A019507_01    | -0.226    | 0.054     | -0.052 NA |           | 0.683     | 0.813 NA |           | 0.603  |
| A019546_01 NA | NA        |           | -0.965 NA | NA        | NA        | NA       | NA        |        |
| A019605_01    | 0.837     | 0.629     | -0.203 NA |           | 0.122 NA  | NA       |           | 0.32   |
| A019623_01 NA | NA        |           | 0.023     | 0.006 NA  | NA        |          | 0.272     | 0.227  |
| A019735_01 NA |           | -0.157 NA | NA        |           | -0.635    | -0.994   | -0.649 NA |        |
| A019790_01    | 1.563     | 1.218     | -0.816    | -0.866    | 1.474     | 1.395    | 1.817     | 2.03   |
| A019856_01    | 1.335     | 1.337     | -0.296    | -0.346    | 0.758     | 0.415    | 1.413     | 1.428  |
| A019860_01    | 0.577     | 0.235     | -0.161    | -0.111 NA | NA        | NA       |           | -0.553 |
| A019961_01    | 0.453     | 0.43      | 0.136     | 0.036     | 0.453     | 0.53     | 0.225     | 0.224  |
| A020003_01 NA |           | 0.024     | -0.058 NA | NA        | NA        | NA       |           | 0.048  |
| A020052_01 NA | NA        |           | -0.952    | -0.613 NA | NA        |          | -0.482    | -0.578 |
| A020094_01 NA |           | 0.369     | 0.065     | 0.056 NA  | NA        | NA       | NA        |        |
| A020163_01    | 1.277     | 0.749     | 0.343 NA  |           | 0.295 NA  |          | 0.143 NA  |        |
| A020252_01 NA | NA        |           | -0.065 NA | NA        | NA        | NA       |           | 0.045  |
| A020391_01 NA | NA        |           | -0.034    | 0.078 NA  | NA        |          | -0.238 NA |        |
| A020483_01    | 1.04      | 0.96      | 0.219     | 0.068 NA  | NA        |          | 0.038 NA  |        |
| A020662_01 NA | NA        |           | 0.624     | 0.411 NA  | NA        | NA       |           | -0.176 |
| A020698_01    | 0.812     | 0.662     | 0.021     | 0.074     | 0.694     | 0.758    | 0.517     | 0.626  |
| A020745_01    | 0.343     | 0.085     | 0.438 NA  |           | 0.247 NA  | NA       | NA        |        |
| A020865_01    | 0.345     | 0.554     | 0.365     | 0.182     | -0.024 NA |          | -0.322    | -0.65  |
| A020875_01    | 0.537     | 0.348     | -0.062 NA | NA        | NA        | NA       | NA        |        |
| A020877_01    | 0.985     | 1.088     | -0.235    | -0.411    | -0.196    | -0.399   | -0.515    | -0.739 |
| A020895_01 NA | NA        |           | 0.104 NA  | NA        | NA        |          | -0.168 NA |        |
| A020989_01    | 0.624 NA  |           | -0.031    | -0.357 NA | NA        | NA       | NA        |        |
| A021075_01 NA | NA        |           | 0.159     | 0.043 NA  | NA        |          | 0.233     | -0.086 |
| A021101_01    | 0.171     | 0.121     | -0.295 NA |           | -0.814 NA | NA       |           | -0.831 |
| A021199_01    | 0.9       | 0.515     | -0.244    | -0.197 NA |           | 0.767    | 0.396     | 0.503  |
| A021203_01 NA | NA        |           | 0.639     | 0.295 NA  | NA        | NA       | NA        |        |
| A021404_01    | 0.543     | 0.205     | 0.397     | -0.04     | 0.391     | 0.459    | 0.448     | 0.464  |
| A021457_01    | 0.375     | 0.334     | -0.069 NA |           | 0.25 NA   | NA       |           | 0.485  |
| A021598_01 NA | NA        |           | 0.081     | -0.004 NA | NA        |          | -0.142 NA |        |
| A021618_01    | -0.025 NA |           | -0.012    | -0.319    | -0.568    | -0.731   | -0.207    | -0.459 |
| A021825_01 NA |           | -0.613    | -0.682 NA |           | 0         | -0.456   | -0.13 NA  |        |

|            |    |           |        |           |           |          |          |           |        |
|------------|----|-----------|--------|-----------|-----------|----------|----------|-----------|--------|
| A021855_01 |    | 0.471     | 0.238  | -0.158    | -0.252    | 0.796    | 0.546    | 0.183     | 0.216  |
| A022122_01 |    | 0.623     | 0.082  | 0.071     | -0.208    | 1.583    | 1.163    | 1.437     | 1.211  |
| A022228_01 | NA | NA        |        | 0         | -0.112 NA |          | 0.427    | 0.198     | -0.001 |
| A022508_01 | NA | NA        |        | -0.01     | -0.057 NA | NA       |          | -0.162    | -0.139 |
| A022526_01 | NA | NA        |        | -0.101    | -0.135 NA | NA       | NA       |           | -0.462 |
| A022621_01 | NA | NA        |        | 0.286     | 0.176 NA  | NA       | NA       |           | -0.357 |
| A022710_01 |    | -1.26     | -0.501 | 0.052     | -0.049    | 0.326    | 0.128    | 0.405     | 0.198  |
| A022924_01 | NA | NA        |        | -0.265    | -0.177 NA | NA       | NA       |           | -0.092 |
| A023591_01 | NA | NA        |        | 0.433 NA  |           | 0.798 NA |          | 0.52      | 0.401  |
| A023758_01 |    | 1.521     | 1.176  | -1.176    | -0.907    | 0.589    | 0.815    | -0.27     | 0.255  |
| A023785_01 |    | 0.315     | 0.242  | 0.245     | 0.24 NA   | NA       |          | -0.159    | -0.097 |
| A023963_01 |    | 0.691 NA  |        | -0.297    | -0.313 NA | NA       |          | -0.186    | -0.04  |
| A024087_01 | NA |           | 0.198  | 0.363 NA  |           | 0.453 NA | NA       |           | 0.163  |
| A024254_01 |    | 0.467     | 0.435  | -0.297 NA | NA        | NA       | NA       | NA        |        |
| A024432_01 | NA | NA        |        | 0.449     | 0.462 NA  | NA       |          | -0.388    | -0.376 |
| A024688_01 | NA | NA        |        | 0.923     | 0.678 NA  | NA       |          | -0.137    | -0.423 |
| A024828_01 | NA | NA        |        | 0.295     | -0.083 NA | NA       |          | 0.137 NA  |        |
| A024871_01 | NA |           | -0.497 | 0.269 NA  |           | 0.278 NA | NA       |           | 0.34   |
| A025304_01 | NA | NA        |        | -0.071    | -0.249 NA | NA       |          | -0.262    | -0.574 |
| A025505_01 | NA | NA        |        | 0.376     | 0.138 NA  | NA       |          | -0.049 NA |        |
| A025631_01 |    | 0.231     | 0.374  | 0.37      | 0.343     | 0.625 NA |          | 0.566     | 0.531  |
| A025649_01 | NA |           | 0.387  | -0.269 NA |           | 0.845 NA |          | 0.408 NA  |        |
| A025888_01 | NA |           | -0.292 | -0.308    | -0.395 NA |          | -0.339   | -0.088 NA |        |
| A025917_01 |    | 0.526     | 0.067  | 0.243     | -0.038    | 0.095    | -0.099   | 0.091     | -0.18  |
| A025993_01 | NA |           | 0.495  | 0.429     | 0.312 NA  |          | 0.652    | 0.246     | 0.419  |
| A000832_01 | NA | NA        |        | -0.248 NA | NA        |          | 0.357    | 0.489     | 0.553  |
| A000983_01 |    | 1.106     | 1.232  | 0.381     | 0.594     | 0.37     | 0.393 NA |           | 0.143  |
| A001323_01 | NA | NA        | NA     |           | -0.015 NA |          | -0.072   | -0.038 NA |        |
| A001615_01 | NA | NA        |        | -0.049    | -0.064    | 0.807    | 1.108    | 0.728     | 0.628  |
| A002100_01 |    | 1.17      | 1.206  | 0.464     | 0.54      | 0.359    | 0.252    | -0.275    | -0.177 |
| A002428_01 |    | 0.28      | 0.443  | 0.43      | 0.484     | 1.121    | 0.862    | 1.2       | 1.101  |
| A002959_01 |    | 1.096 NA  |        | -0.098    | -0.083 NA | NA       |          | -0.154    | -0.04  |
| A003384_01 |    | 0.821     | 0.965  | 0.824     | 0.678     | 0.748 NA | NA       |           | 0.207  |
| A003432_01 |    | 1.878     | 1.671  | 0.075     | 0.152     | -0.07    | 0.122    | 0.06 NA   |        |
| A003906_01 |    | 0.995     | 0.976  | 0.195     | 0.402     | 0.656    | 1.027    | 0.843     | 1.237  |
| A004158_01 | NA | NA        |        | 0.172     | 0.317 NA  | NA       |          | -0.186    | 0.042  |
| A005016_01 | NA | NA        |        | 0.694     | 0.732     | 0.971 NA |          | 0.41      | 0.691  |
| A006218_01 |    | 1.087     | 0.991  | 0.199     | 0.341     | 0.714    | 0.474    | 0.657     | 0.715  |
| A006571_01 | NA | NA        |        | -0.461    | -0.273 NA | NA       | NA       |           | -0.31  |
| A007664_01 |    | 1.072     | 0.936  | -0.176    | -0.229    | -0.24    | -0.438   | -0.668 NA |        |
| A007996_01 | NA | NA        |        | -0.112    | -0.255 NA | NA       |          | 0.056     | -0.172 |
| A008395_01 | NA | NA        |        | 0.288     | -0.022 NA | NA       |          | -0.059    | -0.284 |
| A009384_01 |    | 0.57      | 0.657  | 0.06      | 0.131     | -0.117   | -0.125   | -0.819    | -0.776 |
| A010777_01 | NA | NA        |        | -0.165    | -0.15 NA  | NA       |          | -0.104 NA |        |
| A011549_01 |    | 1.052     | 0.866  | 0.769     | 0.384     | 1.107    | 0.809    | 0.377     | 0.456  |
| A012282_01 | NA | NA        |        | 0.129     | 0.138 NA  | NA       |          | -0.128    | -0.156 |
| A012617_01 | NA |           | 0.444  | 0.048     | -0.054 NA | NA       |          | 0.388 NA  |        |
| A014149_01 |    | -0.104 NA |        | 1.036     | 1.036     | 0.601    | 0.849    | -0.104    | 0.042  |
| A014237_01 | NA |           | 0.3 NA |           | -0.342 NA | NA       |          | -0.029 NA |        |
| A014458_01 | NA |           | 0.58   | 0.026     | -0.262 NA | NA       |          | -0.033 NA |        |
| A014719_01 |    | 0.981     | 0.842  | 0.02      | 0.122     | 1.343    | 1.281    | 1.022     | 1.105  |
| A014768_01 | NA |           | -0.029 | 0.105     | 0.012 NA  | NA       |          | -0.029    | -0.257 |
| A015277_01 |    | 0.939     | 0.714  | 0.426     | 0.084     | 0.797 NA |          | 0.509     | 0.241  |
| A015501_01 |    | 1.112     | 1.115  | 0.173     | 0.007     | -0.005   | -0.204   | -0.361    | -0.676 |
| A015891_01 |    | 0.429     | 0.225  | 0.613     | 0.392     | 1.548    | 0.884    | 0.924     | 0.857  |
| A016892_01 |    | 1.055     | 1.094  | 0.601     | 0.51      | 0.878    | 1.026    | 0.786     | 0.681  |
| A018578_01 | NA | NA        |        | 0.438     | 0.461     | 0.967    | 0.878    | 0.755     | 0.658  |
| A018773_01 | NA |           | -0.135 | -0.282    | -0.261 NA |          | -0.303   | -0.307    | -0.343 |
| A019147_01 | NA | NA        |        | 0.321     | 0.05 NA   | NA       |          | 0.149     | -0.04  |
| A019173_01 | NA |           | -0.427 | -0.083    | -0.125 NA |          | -0.93    | -0.409    | -0.473 |
| A020365_01 | NA | NA        |        | 0.495     | 0.564 NA  | NA       |          | -0.707    | -0.62  |
| A020695_01 | NA | NA        |        | -0.939    | -0.901 NA | NA       |          | -0.541    | -0.959 |
| A020773_01 | NA | NA        |        | 0.323     | -0.071 NA |          | 0.076    | 0.17      | -0.114 |
| A021007_01 |    | -0.019    | 0.007  | 0.294     | 0.078     | 1.514    | 1.074    | 0.985     | 1.018  |
| A021284_01 | NA | NA        |        | 0.023     | -0.172 NA | NA       |          | -0.464    | -0.654 |
| A021358_01 | NA |           | 0.14   | 0.245     | 0.05 NA   |          | 0.825    | 0.027     | 0.206  |
| A021505_01 |    | 0.357     | 0.512  | -0.125    | -0.254    | 0.308    | 0.432    | -0.222    | -0.123 |
| A021801_01 |    | 1.469     | 1.402  | -1.264    | -1.062    | -0.503   | -0.514   | 1.392     | 1.396  |

|            |    |          |           |           |           |          |           |           |        |
|------------|----|----------|-----------|-----------|-----------|----------|-----------|-----------|--------|
| A021844_01 | NA |          | 0.516     | 0.264     | 0.081 NA  |          | 0.304     | 0.439     | 0.249  |
| A021861_01 | NA | NA       |           | 0.04      | 0.087 NA  | NA       |           | -0.39 NA  |        |
| A021957_01 | NA | NA       |           | 0.607     | 0.562 NA  | NA       |           | -0.293    | -0.415 |
| A022288_01 |    | 1.617    | 1.465     | 0.143     | 0.03      | -0.056   | -0.202    | 0.058     | -0.013 |
| A022312_01 | NA | NA       |           | 0.953     | 0.701     | 0.891 NA |           | 0.206     | -0.039 |
| A023427_01 |    | 1.305    | 0.917     | 0.471     | 0.526     | 1.477    | 1.616     | 1.226     | 1.404  |
| A023639_01 |    | 0.686 NA |           | -0.077 NA |           | 1.022    | 0.756 NA  |           | 0.382  |
| A024654_01 |    | 1.183    | 0.382     | 0.273     | 0.098     | 0.317 NA |           | 0.292 NA  |        |
| A025744_01 | NA | NA       |           | 0.742     | 0.481 NA  | NA       |           | 0.147     | -0.041 |
| A008108_01 |    | 0.664    | 0.936     | 0.475     | 0.442     | 0.91     | 0.79      | 0.49      | 0.414  |
| A011990_01 | NA | NA       |           | 0.463     | 0.276 NA  | NA       |           | 0.015     | -0.087 |
| A018550_01 | NA |          | 0.542     | -0.912 NA | NA        |          | 0.729     | -0.017    | 0.366  |
| A018865_01 | NA |          | -0.16     | 0.314     | 0.207 NA  |          | 0.307     | 0.079     | 0.081  |
| A020743_01 |    | 0.705 NA |           | 0.232     | -0.079 NA |          | 0.042     | 0.082 NA  |        |
| A023790_01 | NA |          | 0.035     | 0.138     | -0.213 NA | NA       |           | -0.198 NA |        |
| A023812_01 | NA |          | 0.318     | -0.227 NA | NA        |          | 0.114     | -0.272 NA |        |
| A024387_01 | NA |          | 0.509     | 0.069     | 0.115 NA  |          | -0.189    | -0.236    | -0.105 |
| A024446_01 |    | 1.275    | 0.535     | -0.719    | -0.701    | 1.535    | 1.125     | 1.437     | 1.414  |
| A024462_01 | NA |          | 0.55      | -0.194 NA | NA        | NA       |           | 0.197 NA  |        |
| A024556_01 |    | 1.743    | 1.431     | 0.037     | 0.022 NA  |          | -0.081    | -0.088 NA |        |
| A025800_01 | NA |          | 0.17      | 0.363     | 0.101 NA  | NA       |           | -0.065 NA |        |
| A000741_01 |    | 0.132    | 0.35      | -0.124    | -0.05 NA  |          | -0.121    | -0.192    | -0.142 |
| A020770_01 |    | 0.3      | 0.865     | -1.905    | -1.806    | 1.481    | 0.761     | 1.627     | 1.738  |
| A001491_01 | NA |          | 0.987     | 0.358     | 0.365     | 0.78     | 1.142     | 0.766     | 0.596  |
| A000015_01 | NA |          | -0.859 NA |           | -0.918 NA |          | -1.026 NA | NA        |        |
| A000400_01 | NA |          | -0.154    | 0.011     | 0.08 NA   |          | 0.029     | 0.082     | 0.035  |
| A000418_01 | NA |          | 0.209     | -0.435    | -0.175 NA |          | 0.069     | -0.248    | 0.077  |
| A000448_01 | NA |          | -0.779    | -0.095    | 0.225 NA  |          | -0.366    | -0.2      | -0.089 |
| A000745_01 | NA |          | 0.022     | 0.279     | 0.153 NA  |          | 0.085     | 0.239     | 0.106  |
| A000942_01 | NA |          | -0.235    | 0.211     | 0.228 NA  |          | 0.04      | 0.063     | -0.096 |
| A001047_01 | NA |          | 0.173     | -0.837 NA | NA        |          | -0.415 NA | NA        |        |
| A001349_01 | NA |          | -0.217    | 0.183     | 0.259 NA  |          | -0.265    | 0.07      | 0.047  |
| A001364_01 | NA |          | -0.027    | 0.04      | 0.049 NA  |          | -0.221    | -0.228    | -0.358 |
| A001393_01 | NA |          | 0.37      | 0.327     | 0.476 NA  |          | -0.137    | -0.199    | -0.061 |
| A001427_01 | NA |          | 0.636     | -0.016    | 0.184 NA  |          | 0.316     | 0.223     | 0.379  |
| A001475_01 | NA |          | -0.573    | 0.304     | 0.158 NA  |          | -0.081    | -0.01     | -0.101 |
| A001493_01 | NA |          | 0.476     | -0.258    | -0.018 NA |          | -0.053    | -0.15     | 0.237  |
| A001569_01 | NA |          | 0.081     | 0.005     | 0.282 NA  |          | 0.197     | -0.053    | 0.093  |
| A002091_01 | NA |          | -0.139    | -0.701 NA | NA        |          | 0.044     | 0.507 NA  |        |
| A002115_01 | NA |          | -0.612    | -0.231    | -0.229 NA |          | -0.084    | -0.16     | -0.321 |
| A002139_01 | NA |          | -0.17     | -0.062    | 0.006 NA  |          | -0.214    | 0.004     | 0.071  |
| A002163_01 | NA | NA       |           | -0.214    | -0.146 NA |          | -0.077    | 0.283     | 0.185  |
| A002347_01 | NA |          | 0.261     | -0.161    | 0.08 NA   | NA       |           | -0.477 NA |        |
| A002358_01 | NA |          | 0.291     | -0.166    | 0.456 NA  |          | 0.087     | -0.003    | 0.498  |
| A002438_01 | NA |          | 0.444     | 0.125     | 0.344 NA  |          | 0.707     | 0.399     | 0.65   |
| A002620_01 | NA |          | 0.965     | 0.198     | 0.38 NA   |          | 0.888     | 0.54      | 0.839  |
| A003454_01 | NA |          | 0.001     | -0.45 NA  | NA        | NA       | NA        | NA        |        |
| A004153_01 | NA | NA       |           | 0.057     | 0.139 NA  |          | 0.212     | 0.178     | 0.138  |
| A004340_01 | NA |          | -0.403    | 0.064     | 0.068 NA  |          | -0.367    | -0.161    | -0.134 |
| A004366_01 | NA |          | 0.135     | -0.38     | -0.114 NA |          | 0.076     | -0.077    | 0.069  |
| A004544_01 | NA |          | 0.334     | 0.203     | 0.244 NA  |          | 0.576     | 0.504     | 0.458  |
| A004681_01 | NA |          | -0.32     | -0.122    | -0.174 NA |          | -0.308    | -0.279    | -0.44  |
| A004767_01 | NA |          | -0.54     | 0.148     | 0.182 NA  | NA       |           | 0.148     | 0.215  |
| A004957_01 | NA |          | 0.587     | 0.73      | 0.474 NA  |          | 0.398     | 0.175     | -0.059 |
| A004958_01 | NA |          | -0.06     | -0.213    | -0.092 NA |          | 0.6       | 0.291     | 0.507  |
| A004969_01 | NA |          | 0.076     | -0.117 NA | NA        | NA       | NA        |           | 0.17   |
| A005896_01 | NA |          | 0.258     | 0.026     | 0.075 NA  |          | 0.489     | 0.249     | 0.483  |
| A005927_01 | NA |          | 0.043     | 0.128     | 0.147 NA  |          | -0.034    | -0.076    | 0.069  |
| A005993_01 | NA |          | 0.803     | -0.141    | 0.025 NA  |          | -0.587    | -0.533    | -0.312 |
| A006010_01 | NA |          | 0.605     | -0.14     | 0.23 NA   |          | 0.178     | -0.876    | -0.448 |
| A006113_01 | NA |          | -0.656    | 0.213     | 0.103 NA  |          | -0.079    | 0.309     | 0.213  |
| A006404_01 | NA | NA       |           | 0.216     | 0.111 NA  |          | -0.108    | -0.099    | -0.001 |
| A006526_01 | NA |          | 0.975     | 0.402     | 0.455 NA  |          | 0.979     | 0.735     | 1.046  |
| A006614_01 | NA |          | 0.099     | 0.003     | 0.114 NA  |          | 0.482     | 0.409     | 0.477  |
| A006812_01 | NA |          | -0.276    | -0.036    | 0.047 NA  |          | -0.221    | -0.872    | -0.815 |
| A006983_01 | NA |          | 0.327     | 0.382     | 0.527 NA  |          | 0.85      | 0.532     | 0.598  |
| A007065_01 | NA |          | 0.294     | -0.646    | -0.454 NA |          | -0.696 NA |           | -0.774 |
| A007160_01 | NA |          | 0.256     | -0.731    | -0.482 NA |          | -0.656    | -0.837    | -0.707 |

|            |    |        |        |        |    |        |        |        |
|------------|----|--------|--------|--------|----|--------|--------|--------|
| A007253_01 | NA | 0.417  | -0.305 | -0.238 | NA | 1.023  | 1.036  | 0.927  |
| A007301_01 | NA | -0.704 | 0.468  | 0.302  | NA | 0.098  | 0.132  | -0.098 |
| A007345_01 | NA | -0.396 | -0.253 | -0.226 | NA | -0.339 | 0.057  | -0.049 |
| A007579_01 | NA | 0.142  | -0.159 | 0.06   | NA | -0.089 | -0.756 | -0.618 |
| A007731_01 | NA | -0.117 | -0.084 | -0.105 | NA | -0.123 | 0.205  | 0.052  |
| A007737_01 | NA | 0.065  | -0.065 | -0.031 | NA | -0.283 | -0.064 | -0.045 |
| A008444_01 | NA | -0.151 | -0.296 | -0.289 | NA | -0.189 | -0.275 | -0.373 |
| A008462_01 | NA | -0.038 | 0.032  | -0.07  | NA | -0.012 | 0.206  | 0.257  |
| A009204_01 | NA | -0.746 | -1.503 | -1.544 | NA | -1.226 | -0.448 | -0.696 |
| A009242_01 | NA | 0.096  | -0.011 | 0.093  | NA | 0.265  | -0.033 | 0.016  |
| A009243_01 | NA | 0.377  | 0.227  | 0.113  | NA | -0.127 | 0.2    | 0.095  |
| A009644_01 | NA | 0.207  | -0.067 | NA     | NA | 0.16   | NA     | NA     |
| A009651_01 | NA | 0.104  | -0.248 | -0.057 | NA | 0.224  | 0.05   | 0.492  |
| A009685_01 | NA | 0.375  | -0.278 | -0.284 | NA | 0.175  | 0.207  | 0.131  |
| A009717_01 | NA | 0.831  | -0.003 | -0.025 | NA | 0.347  | 0.253  | 0.069  |
| A009718_01 | NA | -1.148 | -0.669 | -0.494 | NA | -0.882 | -0.781 | -0.91  |
| A009724_01 | NA | 0.456  | NA     | -0.084 | NA | -0.085 | -0.102 | NA     |
| A010662_01 | NA | 0.682  | 0.161  | 0.259  | NA | 0.333  | NA     | 0.27   |
| A011147_01 | NA | -0.543 | -0.148 | -0.252 | NA | -0.691 | -0.095 | -0.167 |
| A011464_01 | NA | 0.429  | 0.386  | 0.338  | NA | 0.473  | 0.268  | 0.468  |
| A011466_01 | NA | NA     | 0.249  | 0.233  | NA | 0.029  | -0.197 | -0.171 |
| A011639_01 | NA | NA     | -0.27  | -0.413 | NA | 0.127  | 0.448  | 0.43   |
| A011648_01 | NA | 0.105  | 0.161  | 0.105  | NA | 0.276  | 0.296  | 0.323  |
| A011649_01 | NA | 0.371  | 0.276  | 0.407  | NA | -0.048 | 0.077  | 0.1    |
| A011737_01 | NA | -0.34  | -0.066 | 0.04   | NA | 0.364  | -0.028 | -0.131 |
| A011739_01 | NA | -0.334 | -0.414 | -0.207 | NA | -0.011 | -0.179 | 0      |
| A011796_01 | NA | -0.168 | -0.411 | -0.353 | NA | -0.143 | -0.059 | -0.183 |
| A011824_01 | NA | -0.683 | -0.127 | -0.096 | NA | -0.232 | -0.175 | -0.213 |
| A012405_01 | NA | 0.356  | 0.436  | 0.278  | NA | -0.073 | -0.113 | -0.283 |
| A012825_01 | NA | -0.066 | 0.191  | 0.166  | NA | -0.011 | NA     | 0.121  |
| A012892_01 | NA | 0.106  | -0.291 | -0.134 | NA | -0.093 | -0.13  | 0.032  |
| A013060_01 | NA | 0.145  | 0.048  | -0.044 | NA | 0.058  | 0.026  | -0.046 |
| A013531_01 | NA | 0.241  | -0.723 | NA     | NA | NA     | NA     | NA     |
| A013767_01 | NA | -0.108 | -0.737 | -0.636 | NA | -0.285 | -0.151 | -0.232 |
| A013865_01 | NA | 0.213  | -0.058 | 0.015  | NA | 0.075  | -0.115 | 0.007  |
| A013881_01 | NA | -0.836 | -0.494 | -0.323 | NA | NA     | -0.386 | -0.575 |
| A014044_01 | NA | 0.224  | 0.279  | 0.06   | NA | NA     | -0.102 | -0.337 |
| A014689_01 | NA | -0.38  | -0.043 | -0.119 | NA | -0.058 | -0.308 | -0.434 |
| A014744_01 | NA | 1.141  | -1.937 | -1.579 | NA | 1.161  | 0.939  | 1.326  |
| A014791_01 | NA | 0.059  | 0.726  | 0.785  | NA | 0.29   | 0.058  | 0.226  |
| A014967_01 | NA | NA     | 0.287  | 0.296  | NA | NA     | -0.328 | -0.144 |
| A015087_01 | NA | 0.108  | 0.546  | 0.069  | NA | NA     | 0.318  | -0.076 |
| A015212_01 | NA | -0.516 | 0.188  | 0.209  | NA | -0.009 | -0.142 | -0.026 |
| A015226_01 | NA | -0.287 | 0.197  | -0.613 | NA | -0.307 | 0.688  | 0.097  |
| A015340_01 | NA | -0.631 | 0.274  | 0.249  | NA | -0.598 | -0.521 | -0.209 |
| A015551_01 | NA | NA     | -0.681 | NA     | NA | -0.418 | -0.553 | NA     |
| A015561_01 | NA | -0.382 | -0.588 | -0.374 | NA | -0.913 | -0.521 | -0.44  |
| A015575_01 | NA | -0.626 | 0.67   | 0.563  | NA | -0.851 | -0.185 | -0.482 |
| A016276_01 | NA | -0.095 | -0.048 | -0.088 | NA | -0.136 | -0.093 | -0.133 |
| A016302_01 | NA | -0.521 | 0.017  | 0.002  | NA | 0.148  | 0.135  | 0.09   |
| A016527_01 | NA | NA     | NA     | NA     | NA | -0.129 | 0.183  | NA     |
| A017523_01 | NA | -0.445 | -1.115 | -0.945 | NA | -0.177 | -0.13  | 0.083  |
| A017547_01 | NA | 0.346  | 0.714  | 0.415  | NA | 0.618  | 0.701  | 0.517  |
| A017927_01 | NA | -0.42  | 0.046  | -0.048 | NA | -0.174 | 0.005  | 0.149  |
| A017943_01 | NA | -0.145 | 0.484  | 0.354  | NA | 0.411  | 0.249  | 0.339  |
| A018485_01 | NA | -0.635 | -0.282 | -0.288 | NA | -0.12  | 0.003  | 0.077  |
| A018705_01 | NA | 0.057  | -0.486 | -0.449 | NA | 0.407  | 0.588  | 0.685  |
| A018761_01 | NA | -0.324 | -0.432 | -0.303 | NA | -0.319 | -0.251 | -0.361 |
| A018765_01 | NA | -0.899 | -0.597 | -0.433 | NA | -0.349 | -0.128 | -0.129 |
| A018790_01 | NA | -0.352 | -0.177 | -0.146 | NA | -0.44  | -0.34  | -0.356 |
| A018794_01 | NA | -0.026 | 0.236  | 0.054  | NA | -0.017 | 0.256  | -0.254 |
| A018861_01 | NA | 0.2    | -0.079 | -0.09  | NA | 0.329  | 0.169  | 0.182  |
| A018876_01 | NA | -0.261 | -1.226 | -1.211 | NA | -0.772 | -0.899 | -0.412 |
| A019001_01 | NA | -1.689 | -0.773 | -0.718 | NA | -1.057 | -1.073 | -1.087 |
| A019031_01 | NA | 0.962  | 0.358  | 0.273  | NA | 1.065  | 0.984  | 1.135  |
| A019042_01 | NA | 0.423  | 0.47   | 0.333  | NA | 0.591  | 0.29   | 0.145  |
| A019054_01 | NA | 0.365  | 0.316  | 0.088  | NA | 0.124  | 0.235  | 0.131  |
| A019079_01 | NA | 1.261  | 0.426  | 0.156  | NA | 0.107  | 0.429  | 0.407  |

|            |    |        |        |        |    |        |        |        |
|------------|----|--------|--------|--------|----|--------|--------|--------|
| A019084_01 | NA | NA     | -0.302 | -0.571 | NA | -0.146 | -0.089 | -0.326 |
| A019125_01 | NA | NA     | -0.165 | NA     | NA |        | -0.086 | -0.079 |
| A019185_01 | NA | 0.425  | -0.017 | -0.008 | NA | 0.175  | 0.251  | 0.199  |
| A019226_01 | NA | -0.354 | -0.285 | -0.422 | NA | -0.152 | 0.277  | 0.21   |
| A019232_01 | NA | NA     | 0.423  | 0.25   | NA |        | -0.027 | -0.324 |
| A019280_01 | NA | 0.24   | 0.055  | NA     | NA | 0.053  | -0.068 | 0.261  |
| A019462_01 | NA | NA     | -0.065 | NA     | NA | NA     | NA     |        |
| A019792_01 | NA | 0.585  | -0.054 | -0.073 | NA | 0.652  | 0.436  | 0.7    |
| A019986_01 | NA | 0.384  | -0.131 | -0.173 | NA | 0.428  | 0.098  | 0.288  |
| A019992_01 | NA | 0.505  | 0.021  | 0.012  | NA | -0.014 | -0.019 | 0.096  |
| A019996_01 | NA | -0.252 | 0.03   | 0.051  | NA | -0.066 | 0.076  | -0.115 |
| A020426_01 | NA | 0.78   | -0.323 | -0.16  | NA | 0.235  | -0.07  | 0.248  |
| A020775_01 | NA | -0.007 | 0.035  | -0.032 | NA | -0.1   | 0.152  | 0.11   |
| A020779_01 | NA | 0.393  | -1.223 | -1.203 | NA | -0.289 | -0.83  | -1.046 |
| A021737_01 | NA | -0.597 | -0.383 | -0.521 | NA | -0.632 | NA     |        |
| A022056_01 | NA | -0.089 | -0.037 | -0.118 | NA | 0.255  | 0.26   | 0.182  |
| A022274_01 | NA | NA     | -0.044 | NA     | NA |        | -0.442 | -0.701 |
| A023555_01 | NA | -0.294 | 0.116  | -0.181 | NA | -0.493 | -0.2   | -0.298 |
| A024044_01 | NA | 0.326  | 0.152  | 0.041  | NA | 0.164  | 0.23   | 0.107  |
| A024170_01 | NA | -0.388 | -0.152 | -0.161 | NA | -0.072 | -0.308 | -0.284 |
| A024467_01 | NA | 0.765  | -0.304 | -0.118 | NA | 0.104  | -0.096 | 0.265  |
| A024543_01 | NA | -0.031 | NA     | 0.751  | NA | 0.291  | -0.174 | -0.291 |
| A024776_01 | NA | 0.436  | 0      | -0.034 | NA | 0.124  | 0.117  | 0.033  |
| A025167_01 | NA | -0.375 | 0.466  | 0.388  | NA | 0.029  | 0.019  | 0.023  |
| A025902_01 | NA | -0.303 | -0.312 | -0.319 | NA | -0.109 | 0.072  | -0.045 |
| A026000_01 | NA | 0.444  | 0.67   | 0.492  | NA | 0.145  | 0.428  | 0.195  |
| A026032_01 | NA | 0.362  | 0.324  | 0.354  | NA | 0.214  | 0.342  | 0.277  |
| A000572_01 | NA | NA     | -0.056 | 0.294  | NA | NA     |        | 0.539  |
| A004818_01 | NA | NA     | 0.069  | 0.339  | NA |        | -0.014 | 0.159  |
| A005988_01 | NA | NA     | 0.105  | 0.253  | NA |        | 0.68   | 0.873  |
| A006161_01 | NA | 0.012  | 0.176  | 0.168  | NA | 0.491  | 0.291  | 0.246  |
| A007292_01 | NA | NA     | -0.079 | 0.039  | NA |        | -0.447 | -0.582 |
| A007713_01 | NA | -0.342 | -0.295 | -0.2   | NA | -0.515 | -0.488 | -0.455 |
| A009463_01 | NA | 0.855  | 0.415  | 0.291  | NA | 0.38   | 0.063  | 0.263  |
| A011646_01 | NA | NA     | 0.486  | 0.244  | NA | 0.082  | 0.015  | -0.223 |
| A012457_01 | NA | 0.218  | 0.046  | 0.095  | NA |        | -0.236 | -0.237 |
| A012674_01 | NA | 0.35   | 0.592  | 0.292  | NA | 0.797  | 0.904  | 0.797  |
| A016524_01 | NA | NA     | 0.492  | 0.31   | NA |        | -0.003 | -0.029 |
| A017134_01 | NA | NA     | 0.327  | 0.227  | NA | 0.273  | 0.376  | 0.5    |
| A018784_01 | NA | 0.273  | -0.188 | -0.137 | NA | 0.233  | -0.364 | -0.698 |
| A019101_01 | NA | NA     | 0.352  | 0.172  | NA |        | -0.131 | -0.207 |
| A020277_01 | NA | NA     | 0.416  | 0.325  | NA | -0.204 | 0.126  | -0.028 |
| A024469_01 | NA | NA     | -0.857 | -0.722 | NA |        | -0.732 | -0.747 |
| A024824_01 | NA | -0.086 | -0.228 | -0.23  | NA |        | 0.379  | 0.298  |
| A005098_01 | NA | 0.709  | NA     | 0.415  | NA | 0.831  | 0.165  | NA     |































































































































































































































































































**Table S2. Expression profile of differentially expressed genes in the complete dataset**

Differentially expressed genes based on 3% FDR multiclass SAM after technical replicas averaged and 2-fold change after biological replicas averaged. Normalized Log2 (mean ratio relative to 0-1 DPA mean), 3% FDR multiclass SAM Score (d) and q value, and Scores for contribution in the first and in the second principal components in the two components PCA analysis are shown. NA, feature signal did not pass the quality control parameters.

| Oligo ID   | AGI       | Annotation                       | 0-1 DPA<br>Mean | 2-3 DPA<br>Mean | 4-5 DPA<br>Mean | 6-7 DPA<br>Mean | 8-9 DPA<br>Mean | 10-11 DPA<br>Mean | 12-14 DPA<br>Mean | Score(d)<br>SAM MC<br>(FDR 3%) | q-value SAM<br>MC (FDR<br>3%) | PC1<br>Score | PC2<br>Score |
|------------|-----------|----------------------------------|-----------------|-----------------|-----------------|-----------------|-----------------|-------------------|-------------------|--------------------------------|-------------------------------|--------------|--------------|
| A000022_01 | At1g12140 | hypothetical protein; protein ic | 0               | 0.05            | 0.58            | 0.60            | 0.77            | 1.03              | 1.30              | 1.1                            | 0.10                          | -1.81        | -1.10        |
| A000029_01 | At1g78580 | trehalose-6-phosphate synthase   | 0               | -0.60           | -1.36           | -1.22           | -0.89           | -1.23             | -1.25             | 0.6                            | 4.47                          | 2.53         | -0.73        |
| A000031_01 | At1g19670 | expressed protein; protein id:   | 0               | -0.22           | -0.74           | -1.26           | -1.15           | -1.48             | -2.07             | 0.6                            | 4.47                          | 2.55         | 0.72         |
| A000061_01 | At1g76590 | expressed protein; protein id:   | 0               | 3.20            | 3.17            | 3.35            | 3.20            | 3.41              | 3.28              | 1.0                            | 0.18                          | -1.81        | 0.85         |
| A000063_01 | At1g76560 | expressed protein; protein id:   | 0               | 0.81            | 0.71            | 0.78            | 1.41            | 1.29              | 1.26              | 1.2                            | 0.06                          | -1.91        | -0.37        |
| A000065_01 | At1g68110 | expressed protein; protein id:   | 0               | 0.37            | 0.62            | 0.70            | 0.86            | 1.13              | 1.28              | 0.6                            | 4.47                          | -1.97        | -0.79        |
| A000124_01 | At1g23040 | expressed protein; protein id:   | 0               | 1.99            | 2.58            | 2.54            | 2.71            | 2.55              | 2.65              | 1.2                            | 0.06                          | -1.91        | 0.57         |
| A000146_01 | At1g19850 | auxin response transcription f   | 0               | 0.33            | 0.10            | -0.53           | -1.47           | -1.46             | -1.41             | 0.8                            | 0.55                          | 2.18         | 1.38         |
| A000157_01 | At1g77060 | carboxyphosphoenolpyruvate       | 0               | -0.09           | -0.77           | -1.28           | -1.17           | -1.08             | -1.33             | 0.7                            | 2.21                          | 2.52         | 0.36         |
| A000173_01 | At1g44446 | chlorophyll a oxygenase; prot    | 0               | 0.83            | 0.80            | 0.81            | 1.25            | 1.12              | 0.95              | 0.8                            | 0.81                          | -1.89        | 0.23         |
| A000220_01 | At1g27000 | bZIP family transcription facto  | 0               | 0.46            | 0.69            | 0.87            | 0.78            | 0.77              | 1.68              | 0.7                            | 0.96                          | -1.71        | -0.52        |
| A000248_01 | At1g75870 | hypothetical protein; protein ic | 0               | -0.06           | -0.21           | 0.56            | 0.71            | 0.77              | 1.29              | 0.8                            | 0.96                          | -1.37        | -1.70        |
| A000253_01 | At1g20330 | sterol-C-methyltransferase; p    | 0               | -0.24           | -0.43           | -0.48           | -0.90           | -1.30             | -1.23             | 1.3                            | 0.06                          | 2.52         | 0.81         |
| A000259_01 | At1g66350 | RGL1;protein id: At1g66350.1     | 0               | -1.19           | -1.24           | -1.13           | -1.41           | -1.32             | -1.18             | 0.9                            | 0.41                          | 2.55         | -1.19        |
| A000260_01 | At1g76020 | unknown protein; protein id: A   | 0               | 0.29            | 0.47            | 0.45            | 0.95            | 1.07              | 0.67              | 0.7                            | 2.21                          | -1.78        | -0.79        |
| A000297_01 | At1g69720 | putative heme oxygenase; pro     | 0               | 0.24            | 0.67            | 0.60            | 1.17            | 1.02              | 1.14              | 0.9                            | 0.37                          | -1.93        | -0.84        |
| A000319_01 | At1g26820 | ribonuclease, RNS3; protein i    | 0               | 2.11            | 1.72            | 1.05            | 0.72            | -0.14             | 0.60              | 1.0                            | 0.18                          | 0.34         | 2.16         |
| A000324_01 | At1g69420 | DHHC-type zinc finger proteir    | 0               | -0.98           | -1.32           | -1.69           | -1.63           | -2.19             | NA                | 0.7                            | 2.21                          | NA           | NA           |
| A000325_01 | At1g20070 | hypothetical protein; protein ic | 0               | 0.41            | 0.49            | 0.79            | 1.66            | 1.58              | 1.37              | 1.2                            | 0.06                          | -1.75        | -1.12        |
| A000329_01 | At1g54570 | expressed protein; protein id:   | 0               | 0.57            | 0.69            | 0.31            | 0.12            | 0.34              | 1.41              | 1.1                            | 0.10                          | -0.87        | 0.10         |
| A000348_01 | At1g80280 | unknown protein; protein id: A   | 0               | -2.20           | -2.62           | -2.15           | -2.16           | -2.19             | -1.65             | 1.3                            | 0.06                          | 2.14         | -1.75        |
| A000352_01 | At1g80270 | hypothetical protein; protein ic | 0               | -1.72           | -1.89           | -1.49           | -2.57           | -2.11             | -2.56             | 0.9                            | 0.37                          | 2.70         | -0.54        |
| A000358_01 | At1g63660 | GMP synthase; protein id: At1    | 0               | -1.21           | -1.35           | -1.12           | -1.57           | -1.41             | -1.55             | 1.0                            | 0.14                          | 2.69         | -0.88        |
| A000382_01 | At1g11080 | serine carboxypeptidase isolc    | 0               | 1.97            | 1.46            | 0.92            | 0.30            | 1.76              | 1.36              | 0.6                            | 2.21                          | -0.65        | 0.97         |
| A000389_01 | At1g79180 | myb family transcription facto   | 0               | 0.47            | 1.28            | 2.00            | 3.62            | 3.26              | 2.37              | 0.6                            | 4.47                          | -1.69        | -0.98        |
| A000406_01 | At1g32470 | glycine cleavage system H pr     | 0               | -0.06           | -0.48           | -0.83           | -0.74           | -0.90             | -1.45             | 0.8                            | 0.66                          | 2.48         | 0.67         |
| A000410_01 | At1g02610 | hypothetical protein; protein ic | 0               | 2.49            | 2.60            | 2.77            | 3.05            | 3.01              | 3.00              | 1.5                            | 0.06                          | -1.94        | 0.52         |
| A000473_01 | At1g03710 | hypothetical protein; protein ic | 0               | -0.14           | -0.57           | -0.73           | -1.10           | -1.28             | -1.34             | 0.9                            | 0.27                          | 2.63         | 0.71         |
| A000489_01 | At1g03550 | expressed protein; protein id:   | 0               | 0.70            | 1.21            | 1.35            | 1.57            | 1.69              | 2.01              | 1.2                            | 0.06                          | -2.04        | -0.53        |
| A000525_01 | At1g03050 | putative protein destination fa  | 0               | -0.09           | 0.31            | 0.50            | 0.72            | 0.79              | 1.27              | 0.9                            | 0.37                          | -1.65        | -1.40        |
| A000548_01 | At1g19330 | expressed protein; protein id:   | 0               | 0.32            | -0.30           | -0.38           | -0.43           | -0.97             | -1.38             | 0.7                            | 1.20                          | 2.19         | 1.10         |
| A000553_01 | At1g11820 | glycosyl hydrolase family 17;    | 0               | -0.80           | -1.00           | -1.16           | -1.27           | -1.18             | -1.28             | 0.8                            | 0.66                          | 2.79         | -0.53        |
| A000555_01 | At1g72180 | leucine-rich repeat transmem     | 0               | 1.04            | 1.29            | 1.29            | 1.21            | 0.57              | 0.97              | 0.9                            | 0.41                          | -1.03        | 1.31         |
| A000567_01 | At1g22190 | AP2 domain transcription fact    | 0               | 1.28            | 1.50            | 1.68            | 1.69            | 1.84              | 2.14              | 1.2                            | 0.06                          | -2.04        | 0.13         |
| A000577_01 | At1g72160 | cytosolic factor, putative; prot | 0               | 0.84            | 1.10            | 1.17            | 1.60            | 1.46              | 0.84              | 1.3                            | 0.06                          | -1.64        | 0.23         |



|            |           |                                  |   |       |       |       |       |       |       |     |      |       |       |
|------------|-----------|----------------------------------|---|-------|-------|-------|-------|-------|-------|-----|------|-------|-------|
| A000579_01 | At1g72230 | blue copper protein, putative;   | 0 | -0.95 | 0.05  | 0.42  | 1.87  | 1.22  | 0.20  | 0.6 | 2.21 | -0.83 | -1.46 |
| A000582_01 | At1g09430 | unknown protein; protein id: A   | 0 | 0.86  | 1.10  | 1.31  | 1.88  | 1.85  | 1.51  | 1.6 | 0.06 | -1.95 | -0.39 |
| A000592_01 | At1g51340 | expressed protein; protein id:   | 0 | 0.23  | 0.81  | 1.05  | 1.58  | 1.58  | 2.07  | 1.2 | 0.06 | -1.87 | -1.12 |
| A000612_01 | At1g13245 | expressed protein; protein id:   | 0 | 1.60  | 2.02  | 2.04  | 1.99  | 2.08  | 2.18  | 1.3 | 0.06 | -1.94 | 0.56  |
| A000619_01 | At1g64360 | expressed protein; protein id:   | 0 | 1.50  | 2.73  | 4.05  | 5.33  | 5.21  | 5.36  | 0.9 | 0.41 | -1.96 | -0.85 |
| A000639_01 | At1g16320 | unknown protein; protein id: A   | 0 | 1.32  | 1.53  | 1.60  | 1.56  | 1.70  | 1.51  | 0.9 | 0.27 | -1.82 | 0.68  |
| A000645_01 | At1g77610 | expressed protein; protein id:   | 0 | -0.52 | -0.52 | -0.63 | -0.93 | -1.11 | -0.83 | 0.9 | 0.31 | 2.67  | 0.01  |
| A000649_01 | At1g29130 | hypothetical protein; protein ic | 0 | 0.54  | 0.91  | 0.80  | 0.91  | 0.94  | 1.01  | 1.1 | 0.10 | -1.99 | 0.18  |
| A000652_01 | At1g29050 | expressed protein; protein id:   | 0 | 1.31  | 1.82  | 1.80  | 2.09  | 1.72  | 1.34  | 1.6 | 0.06 | -1.56 | 0.72  |
| A000653_01 | At1g11530 | thioredoxin h, putative; protei  | 0 | 1.23  | 1.60  | 1.72  | 1.88  | 1.91  | 1.90  | 1.1 | 0.10 | -2.03 | 0.17  |
| A000668_01 | At1g77740 | putative phosphatidylinositol-4  | 0 | -0.10 | 0.32  | 0.39  | 0.63  | 0.55  | 1.08  | 1.0 | 0.26 | -1.61 | -1.32 |
| A000696_01 | At1g68830 | putative protein kinase; protei  | 0 | 0.67  | 1.24  | 1.33  | 1.78  | 2.15  | 2.19  | 1.2 | 0.06 | -2.01 | -0.73 |
| A000722_01 | At1g15415 | hypothetical protein; protein ic | 0 | 0.33  | 0.75  | 0.90  | 1.03  | 0.98  | 1.17  | 1.0 | 0.20 | -1.98 | -0.50 |
| A000742_01 | At1g18450 | expressed protein; protein id:   | 0 | 0.03  | -0.50 | -0.68 | -0.79 | -0.95 | -1.17 | 0.8 | 0.96 | 2.54  | 0.79  |
| A000755_01 | At1g24520 | putative agp1; protein id: At1g  | 0 | 0.34  | 0.69  | 0.96  | 0.92  | 1.06  | 1.50  | 0.9 | 0.41 | -1.92 | -0.72 |
| A000795_01 | At1g66980 | kinase, putative; protein id: At | 0 | 1.27  | 1.87  | 1.57  | 1.38  | 0.96  | 1.31  | 1.1 | 0.14 | -1.23 | 1.36  |
| A000807_01 | At1g53380 | unknown protein; protein id: A   | 0 | -0.68 | -0.81 | -0.74 | -0.61 | -1.20 | -0.85 | 0.6 | 4.47 | 2.47  | -0.67 |
| A000814_01 | At1g74840 | myb family transcription facto   | 0 | 1.28  | 1.27  | 1.33  | 1.18  | 0.94  | 0.84  | 0.6 | 2.21 | -1.17 | 1.54  |
| A000827_01 | At1g80160 | expressed protein; protein id:   | 0 | 2.67  | 2.82  | 2.66  | 2.70  | 3.24  | 3.52  | 1.4 | 0.06 | -1.92 | 0.46  |
| A000828_01 | At1g80180 | expressed protein; protein id:   | 0 | 2.54  | 2.79  | 2.86  | 2.97  | 3.01  | 3.12  | 1.3 | 0.06 | -1.92 | 0.62  |
| A000851_01 | At1g52710 | unknown protein; protein id: A   | 0 | 1.77  | 1.02  | 0.33  | 0.52  | 0.27  | 0.22  | 0.6 | 4.47 | 0.42  | 2.00  |
| A000856_01 | At1g27300 | expressed protein; protein id:   | 0 | 1.30  | 1.20  | 1.26  | 1.09  | 1.51  | 1.54  | 0.8 | 0.96 | -1.81 | 0.54  |
| A000880_01 | At1g25480 | hypothetical protein; protein ic | 0 | 0.46  | 0.59  | 0.87  | 1.82  | 1.69  | 1.92  | 0.6 | 4.47 | -1.84 | -1.14 |
| A000888_01 | At1g50730 | hypothetical protein; protein ic | 0 | 1.13  | 0.93  | 0.71  | 0.91  | 0.72  | -0.11 | 1.1 | 0.14 | -0.07 | 1.59  |
| A000936_01 | At1g80940 | expressed protein; protein id:   | 0 | 0.62  | 0.75  | 0.63  | 0.94  | 0.90  | 1.10  | 0.9 | 0.26 | -1.97 | -0.10 |
| A000937_01 | At1g80950 | expressed protein; protein id:   | 0 | 0.52  | 0.86  | 0.93  | 0.85  | 0.86  | 1.02  | 1.0 | 0.18 | -1.95 | 0.20  |
| A000970_01 | At5g10330 | putative histidinol-phosphate    | 0 | -0.48 | -0.90 | -0.84 | -0.84 | -0.95 | -1.07 | 1.1 | 0.14 | 2.74  | -0.43 |
| A000992_01 | At1g14900 | linker histone protein, putative | 0 | -0.52 | -0.96 | -1.06 | -1.30 | -1.43 | -1.29 | 1.1 | 0.10 | 2.75  | 0.02  |
| A001006_01 | At1g75310 | unknown protein; protein id: A   | 0 | -0.34 | -0.57 | -1.02 | -1.05 | -0.97 | -0.95 | 0.7 | 2.21 | 2.68  | 0.16  |
| A001052_01 | At1g14980 | 10 kDa chaperonin (CPN10);       | 0 | -1.03 | -0.89 | -0.71 | -1.20 | -1.26 | -1.22 | 1.3 | 0.06 | 2.61  | -0.60 |
| A001059_01 | At1g32900 | starch synthase, putative; pro   | 0 | -0.92 | -0.91 | -0.92 | -1.24 | -1.44 | -1.18 | 0.7 | 1.61 | 2.62  | -0.35 |
| A001086_01 | At1g60940 | putative serine/threonine-prot   | 0 | 0.41  | 0.77  | 0.93  | 1.30  | 1.24  | 1.49  | 1.2 | 0.06 | -1.99 | -0.76 |
| A001091_01 | At1g64680 | expressed protein; protein id:   | 0 | 1.06  | 1.34  | 1.22  | 1.37  | 1.40  | 1.20  | 1.7 | 0.06 | -1.85 | 0.66  |
| A001093_01 | At1g79270 | expressed protein; protein id:   | 0 | 1.62  | 1.88  | 1.91  | 1.54  | 1.31  | 2.45  | 1.0 | 0.18 | -1.65 | 0.77  |
| A001098_01 | At1g35780 | expressed protein; protein id:   | 0 | -0.22 | -0.96 | -1.22 | -1.49 | -1.64 | -1.76 | 1.2 | 0.06 | 2.65  | 0.50  |
| A001102_01 | At1g07210 | hypothetical protein; protein ic | 0 | -1.18 | -1.27 | -1.22 | -1.26 | -1.57 | -1.69 | 1.1 | 0.10 | 2.73  | -0.74 |
| A001105_01 | At1g14330 | hypothetical protein; protein ic | 0 | 1.15  | 1.30  | 0.87  | 0.71  | 0.72  | 1.05  | 0.9 | 0.37 | -1.10 | 1.64  |
| A001107_01 | At1g75820 | CLAVATA1 receptor kinase (       | 0 | 0.85  | 1.05  | 0.81  | 0.72  | 0.26  | 0.47  | 0.7 | 1.20 | -0.47 | 1.86  |
| A001115_01 | At1g32100 | pinoresinol-lariciresinol reduc  | 0 | 0.05  | 0.03  | 0.95  | 2.43  | 2.09  | 1.76  | 0.7 | 1.20 | -1.50 | -1.47 |
| A001121_01 | At1g58180 | carbonic anhydrase, putative;    | 0 | 2.51  | 2.32  | 2.06  | 2.00  | 1.97  | 2.10  | 1.6 | 0.06 | -1.47 | 1.38  |
| A001129_01 | At1g78370 | glutathione transferase, putat   | 0 | -2.57 | -2.13 | -1.12 | -0.91 | -0.87 | -0.26 | 0.8 | 0.48 | 0.56  | -2.59 |
| A001135_01 | At1g35720 | Ca2+-dependent membrane-l        | 0 | -1.09 | -1.15 | -1.41 | -2.57 | -2.75 | -2.80 | 1.2 | 0.06 | 2.68  | 0.46  |
| A001136_01 | At1g21410 | F-box protein family; protein i  | 0 | 1.45  | 1.40  | 1.30  | 1.11  | 1.38  | 1.68  | 0.9 | 0.37 | -1.72 | 0.90  |
| A001137_01 | At1g30690 | expressed protein; protein id:   | 0 | -1.14 | -1.10 | -1.28 | NA    | -1.56 | -1.22 | 0.8 | 0.66 | NA    | NA    |

|            |           |                                  |   |       |       |       |       |       |       |     |      |       |       |
|------------|-----------|----------------------------------|---|-------|-------|-------|-------|-------|-------|-----|------|-------|-------|
| A001142_01 | At1g44820 | aminoacylase, putative; prote    | 0 | 0.55  | 0.78  | 0.91  | 1.04  | 1.06  | 1.22  | 0.7 | 1.20 | -2.06 | -0.29 |
| A001144_01 | At1g72260 | thionin; protein id: At1g72260   | 0 | -3.06 | -5.19 | -3.39 | -5.69 | -5.59 | -4.74 | 1.6 | 0.06 | 2.66  | -0.63 |
| A001146_01 | At1g48920 | nucleolin, putative; protein id: | 0 | -0.65 | -0.65 | -0.54 | -1.05 | -1.03 | -1.08 | 0.7 | 2.21 | 2.65  | -0.07 |
| A001154_01 | At1g21780 | unknown protein; protein id: A   | 0 | 0.78  | 0.88  | 0.88  | 1.00  | 1.33  | 1.23  | 1.0 | 0.26 | -2.01 | -0.08 |
| A001155_01 | At1g69490 | expressed protein; protein id:   | 0 | 2.92  | 2.16  | 1.66  | 1.27  | 0.78  | 2.02  | 0.7 | 1.61 | -0.51 | 1.74  |
| A001165_01 | At1g13280 | allene oxide cyclase, putative   | 0 | -0.55 | -0.97 | -1.24 | -1.65 | -1.75 | -1.99 | 1.2 | 0.06 | 2.74  | 0.37  |
| A001166_01 | At1g45130 | glycosyl hydrolase family 35 (   | 0 | -1.31 | -1.42 | -1.42 | -1.31 | -1.87 | -1.60 | 0.8 | 0.96 | 2.64  | -0.84 |
| A001180_01 | At1g70290 | trehalose-6-phosphate synthe     | 0 | 2.00  | 2.13  | 2.24  | 2.35  | 2.11  | 2.38  | 1.6 | 0.06 | -1.88 | 0.72  |
| A001188_01 | At1g22710 | putative sucrose transport prc   | 0 | 0.51  | 1.04  | 1.23  | 1.68  | 1.40  | 1.90  | 1.1 | 0.10 | -1.97 | -0.65 |
| A001197_01 | At1g27320 | putative sensory transduction    | 0 | 1.68  | 1.87  | 1.74  | 1.60  | 1.67  | 2.09  | 1.1 | 0.10 | -1.78 | 0.88  |
| A001212_01 | At1g56220 | expressed protein; protein id:   | 0 | 1.73  | 1.29  | 1.24  | 1.03  | 0.82  | 0.85  | 0.6 | 4.47 | -0.68 | 1.94  |
| A001216_01 | At1g74020 | strictosidine synthase family;   | 0 | 0.83  | 1.56  | 2.01  | 2.27  | 2.73  | 3.33  | 1.9 | 0.06 | -1.97 | -0.82 |
| A001219_01 | At1g32160 | expressed protein; protein id:   | 0 | 0.14  | 0.50  | 0.33  | 0.98  | 1.00  | 1.18  | 1.0 | 0.20 | -1.88 | -1.13 |
| A001227_01 | At1g78280 | unknown protein; protein id: A   | 0 | 0.46  | 1.05  | 0.96  | 0.88  | 0.85  | 1.21  | 1.0 | 0.20 | -1.75 | 0.21  |
| A001231_01 | At1g63940 | monodehydroascorbate reduc       | 0 | -0.96 | -1.04 | -1.13 | -1.20 | -1.21 | -1.20 | 0.7 | 1.61 | 2.72  | -0.86 |
| A001234_01 | At1g64230 | E2, ubiquitin-conjugating enzy   | 0 | 0.88  | 0.67  | 0.77  | 1.24  | 1.18  | 1.13  | 1.3 | 0.06 | -1.92 | -0.08 |
| A001240_01 | At1g28260 | hypothetical protein; protein ic | 0 | 1.37  | 1.11  | 1.19  | 1.19  | 1.27  | 1.36  | 0.8 | 0.81 | -1.74 | 0.85  |
| A001241_01 | At1g64880 | expressed protein; protein id:   | 0 | -0.86 | -1.05 | -1.13 | -1.89 | -1.99 | -2.10 | 0.6 | 4.47 | 2.71  | 0.33  |
| A001242_01 | At1g52400 | glycosyl hydrolase family 1, b   | 0 | -3.67 | -5.20 | -3.80 | -6.27 | -6.42 | -5.55 | 1.3 | 0.06 | 2.74  | -0.50 |
| A001247_01 | At1g50420 | scarecrow-like 3; protein id: A  | 0 | 1.36  | 1.19  | 0.82  | 0.32  | 0.08  | 0.68  | 0.8 | 0.96 | 0.09  | 2.08  |
| A001248_01 | At1g63120 | membrane protein, putative; p    | 0 | 0.39  | 0.55  | 0.82  | 1.55  | 0.92  | 0.62  | 0.7 | 2.21 | -1.39 | -0.37 |
| A001250_01 | At1g03090 | putative 3-methylcrotonyl-CoA    | 0 | 1.87  | 1.38  | 1.10  | 1.08  | 1.15  | 0.72  | 1.2 | 0.06 | -0.64 | 1.77  |
| A001254_01 | At1g18270 | unknown protein; protein id: A   | 0 | 1.86  | 1.63  | 1.29  | 1.16  | 1.28  | 1.33  | 1.0 | 0.16 | -1.17 | 1.63  |
| A001261_01 | At1g36370 | putative hydroxymethyltransfe    | 0 | 0.02  | 0.38  | 1.27  | 0.93  | 0.53  | 2.29  | 1.2 | 0.06 | -1.33 | -1.10 |
| A001263_01 | At1g20380 | prolyl endopeptidase, putative   | 0 | 0.66  | -0.10 | 0.15  | 0.74  | 1.04  | 1.28  | 0.7 | 1.61 | -1.20 | -1.05 |
| A001284_01 | At1g79040 | photosystem II polypeptide, p    | 0 | 1.05  | 1.39  | 1.47  | 1.67  | 1.35  | 1.56  | 1.0 | 0.16 | -1.94 | 0.39  |
| A001285_01 | At1g50020 | tubulin alpha-6 chain, putative  | 0 | 1.01  | 1.32  | 1.26  | 1.35  | 1.37  | 1.87  | 1.5 | 0.06 | -1.99 | 0.17  |
| A001289_01 | At1g35680 | 50S ribosomal protein L21 ch     | 0 | -0.64 | -0.88 | -0.98 | -0.78 | -0.80 | -1.09 | 0.6 | 4.47 | 2.64  | -0.87 |
| A001291_01 | At1g44760 | hypothetical protein; protein ic | 0 | -0.35 | -1.14 | -0.75 | -0.78 | -0.96 | -1.14 | 0.8 | 0.96 | 2.52  | -0.38 |
| A001299_01 | At1g07600 | metallothionein-like protein; p  | 0 | 1.07  | 1.73  | 2.38  | 2.34  | 2.51  | 3.45  | 1.5 | 0.06 | -1.99 | -0.59 |
| A001303_01 | At1g15670 | expressed protein; protein id:   | 0 | 2.25  | 2.34  | 2.13  | 1.86  | 2.20  | 2.78  | 1.4 | 0.06 | -1.75 | 0.84  |
| A001308_01 | At1g01725 | expressed protein; protein id:   | 0 | 0.57  | 0.75  | 0.87  | 1.17  | 1.14  | 0.97  | 0.8 | 0.96 | -1.97 | -0.30 |
| A001339_01 | At1g02860 | expressed protein; protein id:   | 0 | 1.00  | 1.29  | 1.60  | 1.78  | 1.99  | 2.08  | 1.2 | 0.06 | -2.07 | -0.35 |
| A001340_01 | At1g33140 | ribosomal protein L9, putative   | 0 | -0.81 | -1.04 | -1.10 | -1.60 | -1.89 | -1.90 | 0.7 | 0.96 | 2.75  | 0.22  |
| A001355_01 | At1g30795 | expressed protein; protein id:   | 0 | -1.58 | -3.45 | -2.45 | -4.04 | -3.72 | -3.42 | 1.8 | 0.06 | 2.66  | -0.36 |
| A001369_01 | At1g10522 | expressed protein; protein id:   | 0 | -2.40 | -2.54 | -2.05 | -2.19 | -2.34 | -2.66 | 1.3 | 0.06 | 2.51  | -1.37 |
| A001374_01 | At1g25330 | helix-loop-helix protein homol   | 0 | -1.46 | -3.59 | -3.04 | -5.00 | -4.75 | -4.22 | 1.9 | 0.06 | 2.67  | 0.01  |
| A001375_01 | At1g02790 | polygalacturonase, putative; p   | 0 | 0.34  | 0.49  | 0.82  | 0.64  | 0.74  | 1.32  | 0.7 | 1.61 | -1.74 | -0.55 |
| A001378_01 | At1g32460 | expressed protein; protein id:   | 0 | 1.10  | 1.14  | 0.91  | 0.94  | 1.00  | 1.18  | 1.2 | 0.06 | -1.68 | 1.08  |
| A001380_01 | At1g31850 | unknown protein; protein id: A   | 0 | -0.50 | -0.61 | -0.98 | -1.44 | -1.66 | -1.79 | 1.3 | 0.06 | 2.64  | 0.65  |
| A001387_01 | At1g01300 | chloroplast nucleoid DNA bin     | 0 | -0.82 | -1.17 | -1.08 | -1.71 | -2.26 | -2.30 | 0.7 | 0.96 | 2.72  | 0.34  |
| A001390_01 | At1g45976 | S-ribonuclease binding protei    | 0 | 0.85  | 0.66  | 0.70  | 0.90  | 1.07  | 1.01  | 0.8 | 0.48 | -1.81 | 0.09  |
| A001392_01 | At1g19660 | expressed protein; protein id:   | 0 | 1.30  | 1.38  | 1.53  | 2.05  | 2.06  | 2.18  | 1.2 | 0.06 | -2.04 | -0.19 |
| A001418_01 | At1g75220 | integral membrane protein, p     | 0 | 1.30  | 0.91  | 0.50  | 0.53  | 0.40  | 0.22  | 0.7 | 0.96 | 0.08  | 2.15  |

|            |           |                                   |   |       |       |       |       |       |       |     |      |       |       |
|------------|-----------|-----------------------------------|---|-------|-------|-------|-------|-------|-------|-----|------|-------|-------|
| A001420_01 | At1g27370 | putative squamosa-promoter        | 0 | -0.67 | -1.29 | -1.61 | -1.32 | -1.54 | -1.48 | 0.9 | 0.31 | 2.64  | -0.41 |
| A001429_01 | At1g70710 | glycosyl hydrolase family 9 (e    | 0 | -0.49 | -1.27 | -1.57 | -2.46 | -2.87 | -2.29 | 1.1 | 0.10 | 2.62  | 0.58  |
| A001435_01 | At1g62510 | similar to 14KD proline-rich pi   | 0 | 0.87  | 0.86  | 1.16  | 1.05  | 1.57  | 2.15  | 0.9 | 0.37 | -1.68 | -0.64 |
| A001441_01 | At1g50250 | chloroplast FtsH protease; pro    | 0 | 0.70  | 1.23  | 1.22  | 1.34  | 1.48  | 1.54  | 1.1 | 0.14 | -2.03 | -0.11 |
| A001451_01 | At1g21400 | branched-chain alpha keto-ac      | 0 | 2.37  | 2.16  | 1.88  | 1.80  | 1.88  | 2.11  | 1.0 | 0.16 | -1.50 | 1.29  |
| A001455_01 | At1g25260 | expressed protein; protein id:    | 0 | -0.20 | -0.70 | -0.69 | -1.33 | -1.39 | -1.52 | 0.8 | 0.81 | 2.63  | 0.72  |
| A001471_01 | At1g66430 | fructokinase, putative; protein   | 0 | -1.69 | -2.38 | -2.27 | -2.41 | -3.00 | NA    | 0.9 | 0.37 | NA    | NA    |
| A001472_01 | At1g26920 | expressed protein; protein id:    | 0 | 0.94  | 1.40  | 1.49  | 1.66  | 1.74  | 2.21  | 1.9 | 0.06 | -2.05 | -0.25 |
| A001477_01 | At1g14380 | expressed protein; protein id:    | 0 | -0.12 | 0.68  | 0.87  | 1.40  | 1.28  | 0.74  | 0.8 | 0.48 | -1.47 | -0.94 |
| A001481_01 | At1g19740 | unknown protein; protein id: A    | 0 | 0.18  | 0.65  | 0.78  | 1.09  | 1.12  | 0.95  | 1.3 | 0.06 | -1.87 | -0.83 |
| A001495_01 | At1g52890 | NAM-like protein; protein id: A   | 0 | 1.57  | 1.38  | 1.20  | 1.39  | 1.32  | 1.47  | 0.9 | 0.31 | -1.65 | 1.12  |
| A001518_01 | At1g09750 | expressed protein; protein id:    | 0 | -1.07 | -2.02 | -1.92 | -3.12 | -2.76 | NA    | 0.8 | 0.55 | NA    | NA    |
| A001558_01 | At1g65290 | acyl carrier protein, putative; p | 0 | -0.70 | -0.67 | -0.71 | -1.02 | -1.03 | -1.01 | 0.7 | 1.61 | 2.75  | -0.35 |
| A001566_01 | At1g29900 | carbamoylphosphate synthetase     | 0 | -0.51 | -0.84 | -0.84 | -1.16 | -1.35 | -1.35 | 0.7 | 1.20 | 2.75  | 0.23  |
| A001567_01 | At1g07040 | expressed protein; protein id:    | 0 | 1.90  | 1.90  | 1.83  | 1.94  | 1.75  | 1.74  | 0.7 | 0.96 | -1.67 | 1.09  |
| A001578_01 | At1g51060 | histone H2A, putative; protein    | 0 | -1.10 | -1.07 | -0.94 | -1.10 | -1.49 | -1.46 | 1.0 | 0.18 | 2.70  | -0.71 |
| A001602_01 | At1g04590 | expressed protein; protein id:    | 0 | -0.67 | -0.90 | -0.91 | -0.96 | -0.96 | -1.42 | 1.0 | 0.26 | 2.73  | -0.39 |
| A001610_01 | At1g25440 | CONSTANS B-box zinc finge         | 0 | 0.97  | 1.12  | 1.31  | 1.32  | 0.93  | 0.90  | 0.7 | 1.20 | -1.54 | 0.97  |
| A001612_01 | At1g25530 | lysine and histidine specific tr  | 0 | -0.86 | -0.72 | 0.08  | 0.70  | 1.33  | 1.70  | 1.6 | 0.06 | -0.99 | -2.12 |
| A001619_01 | At1g24160 | unknown protein; protein id: A    | 0 | 1.08  | 0.69  | 0.45  | 0.16  | 0.01  | -0.14 | 0.8 | 0.66 | 0.83  | 2.16  |
| A001631_01 | At1g35910 | trehalose-phosphatase, putat      | 0 | 2.01  | 1.45  | 0.53  | -0.16 | -0.06 | -0.31 | 0.7 | 2.21 | 0.99  | 2.01  |
| A001645_01 | At1g33410 | unknown protein; protein id: A    | 0 | -0.53 | -0.74 | -0.71 | -0.89 | -1.34 | -1.06 | 1.2 | 0.06 | 2.68  | 0.06  |
| A001651_01 | At1g33265 | expressed protein; protein id:    | 0 | -0.71 | -0.94 | -0.95 | -0.82 | -0.72 | -0.95 | 0.7 | 1.61 | 2.45  | -1.29 |
| A001671_01 | At1g27980 | sphingosine-1-phosphate lyas      | 0 | 1.68  | 1.89  | 1.67  | 2.10  | 2.23  | 2.65  | 1.1 | 0.10 | -2.01 | 0.17  |
| A001679_01 | At1g55330 | arabinogalactan-protein (AGF      | 0 | -0.26 | -1.03 | -1.35 | -2.16 | -2.46 | -2.41 | 1.2 | 0.06 | 2.61  | 0.77  |
| A001697_01 | At1g77450 | GRAB1-like protein; protein ic    | 0 | 0.90  | 1.21  | 1.54  | 1.71  | 2.04  | 2.52  | 0.9 | 0.27 | -2.00 | -0.62 |
| A001720_01 | At1g72290 | drought induced protein, puta     | 0 | -2.47 | -4.75 | -1.95 | -5.97 | -4.48 | -4.37 | 1.2 | 0.06 | 2.58  | -0.54 |
| A001745_01 | At1g78210 | hypothetical protein; protein ic  | 0 | -1.03 | -1.73 | -1.49 | -1.55 | -1.88 | -2.36 | 0.8 | 0.55 | 2.72  | -0.31 |
| A001758_01 | At1g53000 | CMP-KDO synthetase, putati        | 0 | -0.51 | -1.06 | -1.13 | -0.69 | -1.16 | -1.36 | 1.0 | 0.18 | 2.54  | -0.41 |
| A001760_01 | At1g52930 | expressed protein; protein id:    | 0 | -1.10 | -1.26 | -1.31 | -1.65 | -1.82 | NA    | 0.7 | 1.61 | NA    | NA    |
| A001770_01 | At1g08810 | myb family transcription facto    | 0 | 0.09  | 0.61  | 0.58  | 1.40  | 1.06  | 1.29  | 0.7 | 1.61 | -1.79 | -1.12 |
| A001773_01 | At1g70530 | putative protein kinase; protei   | 0 | 1.14  | 1.62  | 1.71  | 1.70  | 1.77  | 1.63  | 1.2 | 0.06 | -1.94 | 0.38  |
| A001779_01 | At1g73940 | expressed protein; protein id:    | 0 | -0.95 | -1.24 | -1.20 | -1.43 | -1.50 | -1.62 | 1.0 | 0.16 | 2.81  | -0.45 |
| A001789_01 | At1g77320 | hypothetical protein; protein ic  | 0 | -0.36 | 0.48  | 0.73  | 1.02  | 1.12  | 1.47  | 0.8 | 0.66 | -1.61 | -1.47 |
| A001790_01 | At1g64970 | gamma-tocopherol methyltrar       | 0 | -0.13 | 0.59  | 0.91  | 1.08  | 1.12  | 1.61  | 0.8 | 0.96 | -1.72 | -1.27 |
| A001801_01 | At1g68190 | CONSTANS B-box zinc finge         | 0 | 0.82  | 0.70  | 0.76  | 1.19  | 1.43  | 1.09  | 1.3 | 0.06 | -1.85 | -0.32 |
| A001827_01 | At1g17050 | geranyl diphosphate synthase      | 0 | 1.03  | 1.31  | 1.29  | 1.06  | 1.12  | 1.22  | 1.0 | 0.20 | -1.62 | 0.98  |
| A001843_01 | At1g03475 | putative coproporphyrinogen       | 0 | -0.91 | -1.12 | -0.99 | -0.84 | -0.84 | -1.27 | 0.9 | 0.31 | 2.43  | -1.31 |
| A001861_01 | At1g78510 | geranyl diphosphate synthase      | 0 | 1.01  | 1.33  | 1.40  | 1.25  | 1.13  | 1.51  | 0.8 | 0.48 | -1.79 | 0.66  |
| A001874_01 | At1g72680 | putative cinnamyl-alcohol deh     | 0 | 1.30  | 1.04  | 0.77  | 0.51  | 1.10  | 1.25  | 0.9 | 0.31 | -1.21 | 1.02  |
| A001904_01 | At1g51160 | unknown protein; protein id: A    | 0 | -0.60 | -0.78 | -0.89 | -0.85 | -0.72 | -1.02 | 0.7 | 2.21 | 2.63  | -0.81 |
| A001917_01 | At1g71697 | choline kinase, putative; prote   | 0 | 0.72  | 1.09  | 1.18  | 1.28  | 1.48  | 2.01  | 1.0 | 0.16 | -1.97 | -0.49 |
| A001936_01 | At1g20850 | cysteine proteinase XCP2; pr      | 0 | -0.36 | -0.93 | -1.18 | -0.54 | -1.13 | -1.62 | 0.7 | 1.61 | 2.42  | 0.00  |
| A001937_01 | At1g22160 | expressed protein; protein id:    | 0 | -0.26 | -1.19 | -0.54 | -0.51 | -0.41 | -0.73 | 0.6 | 4.47 | 1.73  | -1.23 |

|            |           |                                   |   |       |       |       |       |       |       |     |      |       |       |
|------------|-----------|-----------------------------------|---|-------|-------|-------|-------|-------|-------|-----|------|-------|-------|
| A001967_01 | At1g49430 | acyl CoA synthetase, putative     | 0 | -0.59 | -0.50 | -0.79 | -1.21 | -1.76 | -1.31 | 1.2 | 0.06 | 2.49  | 0.56  |
| A001970_01 | At1g06570 | 4-hydroxyphenylpyruvate diox      | 0 | 2.18  | 1.97  | 1.93  | 2.01  | 2.00  | 2.32  | 1.1 | 0.10 | -1.77 | 0.87  |
| A001980_01 | At1g68570 | peptide transporter, putative;    | 0 | 0.87  | 1.53  | 1.15  | 0.89  | 0.88  | 0.73  | 0.8 | 0.66 | -0.94 | 1.38  |
| A001988_01 | At1g27950 | lipid transfer protein, putative; | 0 | -0.60 | -0.39 | -0.68 | -1.09 | -1.70 | -1.59 | 1.2 | 0.06 | 2.41  | 0.68  |
| A001990_01 | At1g15110 | putative phosphatidylserine s     | 0 | 0.85  | 0.71  | 0.30  | NA    | 0.58  | 1.14  | 0.6 | 4.47 | NA    | NA    |
| A001996_01 | At1g07790 | histone H2B; protein id: At1g0    | 0 | -1.13 | -1.15 | -0.84 | -0.90 | -1.11 | -0.96 | 1.1 | 0.10 | 2.29  | -1.62 |
| A001997_01 | At1g01120 | fatty acid elongase 3-ketoacyl    | 0 | 0.18  | 0.68  | 0.79  | 0.65  | 0.08  | 0.56  | 0.7 | 2.21 | -0.65 | 0.53  |
| A002008_01 | At1g47960 | expressed protein; protein id:    | 0 | 1.90  | 2.39  | 2.49  | 2.52  | 2.00  | 2.36  | 1.2 | 0.06 | -1.78 | 0.79  |
| A002009_01 | At1g28140 | expressed protein; protein id:    | 0 | 0.38  | 0.75  | 0.81  | 1.09  | 1.05  | 0.99  | 1.5 | 0.06 | -1.99 | -0.49 |
| A002013_01 | At1g10470 | putative response regulator 3     | 0 | 0.22  | 0.81  | 1.07  | 1.20  | 1.40  | 1.31  | 1.3 | 0.06 | -1.88 | -0.79 |
| A002014_01 | At1g15950 | cinnamoyl CoA reductase, pu       | 0 | 0.34  | 0.57  | 0.68  | 1.03  | 0.89  | 0.73  | 0.6 | 4.47 | -1.87 | -0.45 |
| A002031_01 | At1g30820 | CTP synthase-like protein; pr     | 0 | 0.70  | 0.72  | 1.12  | 1.19  | 1.28  | 1.10  | 0.6 | 4.47 | -1.99 | -0.23 |
| A002035_01 | At1g49970 | ATP-dependent Clp protease        | 0 | 0.11  | 0.35  | 0.41  | 0.76  | 1.15  | 1.06  | 1.0 | 0.16 | -1.75 | -1.33 |
| A002038_01 | At1g74740 | calcium-dependent protein kin     | 0 | 0.58  | 0.70  | 0.77  | 1.22  | 0.99  | 0.96  | 0.6 | 4.47 | -1.94 | -0.20 |
| A002045_01 | At1g74670 | GAST1-like protein; protein ic    | 0 | 1.67  | 2.52  | 2.24  | 1.62  | 0.72  | 0.26  | 1.0 | 0.16 | -0.14 | 1.72  |
| A002050_01 | At1g07200 | unknown protein; protein id: A    | 0 | 0.82  | 0.79  | 0.76  | 1.39  | 1.38  | 1.55  | 1.1 | 0.10 | -1.91 | -0.52 |
| A002054_01 | At1g22750 | expressed protein; protein id:    | 0 | 0.37  | 0.80  | 0.76  | 1.06  | 1.31  | 1.37  | 0.9 | 0.37 | -1.97 | -0.79 |
| A002062_01 | At1g69830 | putative alpha-amylase; prote     | 0 | -0.99 | -1.00 | -1.17 | -0.82 | -1.26 | -2.44 | 0.7 | 2.21 | 2.36  | -0.19 |
| A002065_01 | At1g72030 | unknown protein; protein id: A    | 0 | 0.71  | 0.37  | 0.64  | 1.19  | 1.20  | 1.21  | 1.0 | 0.16 | -1.78 | -0.71 |
| A002067_01 | At1g56560 | alkaline/neutral invertase, put   | 0 | 0.34  | 0.65  | 0.62  | 1.05  | 0.91  | 1.01  | 0.8 | 0.55 | -2.00 | -0.56 |
| A002070_01 | At1g02500 | S-adenosylmethionine synthe       | 0 | 0.01  | 0.36  | 0.74  | 1.79  | 0.84  | 0.81  | 0.7 | 0.96 | -1.29 | -0.93 |
| A002073_01 | At1g47128 | cysteine proteinase RD21A; p      | 0 | 1.47  | 1.64  | 1.60  | 1.61  | 1.74  | 2.50  | 1.0 | 0.18 | -1.93 | 0.25  |
| A002079_01 | At1g77670 | putative aminotransferase; pr     | 0 | -1.15 | -1.19 | -1.16 | -0.90 | -0.95 | -0.68 | 0.8 | 0.55 | 1.84  | -2.04 |
| A002080_01 | At1g41880 | ribosomal protein; protein id: ,  | 0 | -1.08 | -1.15 | -1.22 | -1.89 | -2.18 | -2.13 | 1.3 | 0.06 | 2.74  | 0.14  |
| A002081_01 | At1g65960 | glutamate decarboxylase 2 (C      | 0 | -0.28 | -0.29 | -0.62 | -1.33 | -1.70 | -1.45 | 1.7 | 0.06 | 2.43  | 0.96  |
| A002086_01 | At1g69620 | 60S ribosomal protein L34, pu     | 0 | -0.69 | -0.82 | -0.95 | -1.33 | -1.76 | -1.90 | 1.0 | 0.18 | 2.70  | 0.38  |
| A002087_01 | At1g70890 | major latex protein (MLP)-rela    | 0 | -0.37 | -0.78 | -1.12 | 0.01  | -0.65 | -1.55 | 0.7 | 2.21 | 1.76  | -0.41 |
| A002094_01 | At1g74560 | putative SET protein, phospai     | 0 | -1.13 | -1.17 | -0.98 | -1.64 | -1.88 | -2.02 | 2.5 | 0.06 | 2.68  | -0.05 |
| A002102_01 | At1g02640 | glycosyl hydrolase family 3; p    | 0 | 0.81  | 1.22  | 1.08  | 1.61  | 1.08  | 0.41  | 0.6 | 2.21 | -1.02 | 0.74  |
| A002103_01 | At1g30360 | expressed protein; protein id:    | 0 | 0.73  | 1.07  | 0.90  | 0.81  | 0.50  | 0.46  | 0.7 | 0.96 | -0.82 | 1.58  |
| A002118_01 | At1g78080 | AP2 domain protein RAP2.4;        | 0 | 1.31  | 1.57  | 1.70  | 1.62  | 1.35  | 1.61  | 1.2 | 0.06 | -1.78 | 0.82  |
| A002120_01 | At1g48300 | hypothetical protein; protein ic  | 0 | 1.00  | 0.98  | 1.49  | 1.97  | 2.26  | 2.01  | 0.9 | 0.37 | -1.92 | -0.72 |
| A002126_01 | At1g02850 | glycosyl hydrolase family 1; p    | 0 | 1.23  | 1.58  | 1.23  | 0.80  | 0.72  | 1.03  | 1.3 | 0.06 | -0.88 | 1.74  |
| A002142_01 | At1g56450 | 20S proteasome beta subunit       | 0 | -1.00 | -0.94 | -0.98 | -0.81 | -0.72 | -0.55 | 0.7 | 2.21 | 1.76  | -2.08 |
| A002146_01 | At1g24360 | putative 3-oxoacyl (acyl-carrie   | 0 | -0.38 | -0.60 | -0.77 | -1.03 | -1.39 | -1.45 | 0.8 | 0.66 | 2.67  | 0.57  |
| A002149_01 | At1g04580 | putative aldehyde oxidase; pr     | 0 | 1.71  | 2.29  | 2.90  | 3.34  | 3.26  | 4.16  | 0.7 | 1.61 | -2.04 | -0.40 |
| A002160_01 | At1g72830 | CCAAT-binding factor B subu       | 0 | 0.61  | 0.99  | 1.05  | 1.11  | 1.21  | 1.08  | 1.0 | 0.20 | -1.99 | 0.03  |
| A002183_01 | At1g74430 | myb family transcription facto    | 0 | -1.25 | -1.78 | -1.75 | -1.73 | -1.93 | -1.76 | 0.7 | 1.61 | 2.71  | -0.78 |
| A002184_01 | At1g18880 | peptide transporter, putative;    | 0 | 0.29  | 0.92  | 1.92  | 2.42  | 2.53  | 2.67  | 0.7 | 1.61 | -1.83 | -1.19 |
| A002210_01 | At1g43670 | fructose 1,6-bisphosphatase,      | 0 | 1.62  | 1.51  | 1.23  | 0.89  | 0.68  | 0.50  | 0.7 | 1.20 | -0.28 | 2.10  |
| A002220_01 | At1g62370 | hypothetical protein; protein ic  | 0 | 1.38  | 1.54  | 1.59  | 1.54  | 1.66  | 2.31  | 1.1 | 0.06 | -1.94 | 0.22  |
| A002224_01 | At1g78460 | hypothetical protein; protein ic  | 0 | 0.25  | 0.43  | 0.85  | 1.15  | 1.29  | 1.48  | 0.8 | 0.66 | -1.86 | -1.18 |
| A002235_01 | At1g62990 | homeodomain-containing pro        | 0 | -0.01 | 0.37  | 1.02  | 2.06  | 2.07  | 1.32  | 1.0 | 0.16 | -1.53 | -1.31 |
| A002244_01 | At1g53560 | expressed protein; protein id:    | 0 | 1.68  | 2.00  | 1.86  | 2.02  | 1.93  | 2.26  | 1.7 | 0.06 | -1.93 | 0.61  |

|            |           |                                    |   |       |       |       |       |       |       |     |      |       |       |
|------------|-----------|------------------------------------|---|-------|-------|-------|-------|-------|-------|-----|------|-------|-------|
| A002258_01 | At1g14890 | expressed protein; protein id:     | 0 | 1.19  | 1.26  | 0.81  | 0.54  | 0.32  | 0.03  | 1.3 | 0.06 | 0.27  | 2.15  |
| A002267_01 | At1g55910 | expressed protein; protein id:     | 0 | -0.34 | 0.53  | 0.69  | 1.02  | 1.05  | 1.17  | 0.7 | 1.61 | -1.56 | -1.29 |
| A002346_01 | At1g72330 | putative alanine aminotransfe      | 0 | -0.02 | 0.16  | 0.53  | 0.52  | 0.59  | 1.14  | 0.7 | 1.20 | -1.57 | -1.34 |
| A002349_01 | At1g22050 | expressed protein; protein id:     | 0 | 0.12  | 0.39  | 0.83  | 1.42  | 1.59  | 1.82  | 1.3 | 0.06 | -1.75 | -1.41 |
| A002363_01 | At1g09420 | putative glucose-6-phosphate       | 0 | 0.29  | 0.40  | 0.64  | 1.00  | 1.12  | 0.87  | 0.9 | 0.37 | -1.79 | -1.04 |
| A002365_01 | At1g21570 | glycine-rich RNA-binding prot      | 0 | 0.90  | 1.11  | 1.10  | 1.05  | 0.62  | 1.10  | 0.9 | 0.37 | -1.46 | 1.09  |
| A002376_01 | At1g17780 | unknown protein; protein id: A     | 0 | 0.45  | 0.89  | 1.15  | 1.61  | 1.64  | 1.72  | 0.6 | 4.47 | -1.96 | -0.81 |
| A002408_01 | At1g16960 | hypothetical protein; protein ic   | 0 | 0.48  | 0.82  | 1.10  | 1.78  | 2.02  | 1.95  | 1.5 | 0.06 | -1.90 | -1.06 |
| A002409_01 | At1g16950 | hypothetical protein; protein ic   | 0 | 3.16  | 1.86  | 0.73  | -1.13 | -0.57 | 0.26  | 0.7 | 1.61 | 0.99  | 1.94  |
| A002413_01 | At1g16870 | unknown protein; protein id: A     | 0 | -0.96 | -1.05 | -1.16 | -0.73 | -0.82 | -1.26 | 0.8 | 0.55 | 2.37  | -1.29 |
| A002418_01 | At1g16705 | expressed protein; protein id:     | 0 | 0.96  | 0.00  | -0.75 | -1.92 | -2.09 | -1.86 | 1.2 | 0.06 | 2.12  | 1.36  |
| A002433_01 | At1g53130 | unknown protein; protein id: A     | 0 | -2.98 | -5.15 | -3.36 | -5.82 | -4.87 | -4.49 | 1.0 | 0.14 | 2.60  | -0.74 |
| A002437_01 | At1g75390 | bZIP transcription factor ATB;     | 0 | -1.30 | -1.13 | -0.67 | -0.99 | -0.83 | -0.11 | 0.9 | 0.31 | 1.03  | -2.12 |
| A002441_01 | At1g27100 | unknown protein; protein id: A     | 0 | 1.50  | 1.52  | 1.52  | 1.37  | 1.25  | 1.71  | 0.7 | 2.21 | -1.68 | 1.04  |
| A002473_01 | At1g69110 | pseudogene, putative ribosom       | 0 | 1.76  | 1.23  | 1.45  | 1.35  | 1.16  | 1.26  | 0.7 | 1.20 | -1.31 | 1.40  |
| A002484_01 | At1g76300 | small nuclear ribonucleoprote      | 0 | -0.80 | -0.96 | -0.90 | -1.00 | -1.00 | -1.06 | 0.8 | 0.81 | 2.71  | -0.89 |
| A002488_01 | At1g76110 | unknown protein; protein id: A     | 0 | 1.39  | 1.13  | 1.16  | 1.20  | 0.86  | 0.89  | 0.7 | 1.20 | -1.17 | 1.56  |
| A002491_01 | At1g11380 | expressed protein; protein id:     | 0 | 1.26  | 1.24  | 0.92  | 0.39  | 0.29  | 0.30  | 1.2 | 0.06 | 0.16  | 2.21  |
| A002514_01 | At1g19300 | glycosyltransferase family; pr     | 0 | -0.69 | 0.25  | 0.50  | 1.84  | 1.24  | 0.63  | 0.7 | 1.61 | -1.11 | -1.41 |
| A002539_01 | At1g32170 | xyloglucan endotransglycosyl.      | 0 | 1.77  | 2.21  | 1.85  | 1.31  | 0.80  | 0.57  | 2.3 | 0.06 | -0.30 | 1.92  |
| A002580_01 | At1g22480 | uclacyanin II, putative; proteir   | 0 | -0.30 | 0.50  | 1.26  | 2.81  | 2.75  | 1.86  | 1.2 | 0.06 | -1.51 | -1.47 |
| A002609_01 | At1g19220 | auxin response factor, putativ     | 0 | 0.24  | 0.38  | 0.35  | 0.96  | 0.78  | 1.23  | 0.7 | 1.20 | -1.76 | -1.10 |
| A002634_01 | At1g73670 | putative MAP kinase; protein       | 0 | -0.09 | 0.40  | 0.49  | 0.66  | 0.79  | 1.08  | 0.7 | 1.61 | -1.70 | -1.35 |
| A002643_01 | At1g12010 | putative amino-cyclopropane-       | 0 | 3.77  | 3.34  | 2.42  | 0.33  | -0.08 | 0.51  | 1.0 | 0.26 | 0.60  | 2.20  |
| A002647_01 | At1g12330 | hypothetical protein; protein ic   | 0 | -0.65 | -1.14 | -1.31 | -1.62 | -2.01 | -2.04 | 1.6 | 0.06 | 2.76  | 0.30  |
| A002651_01 | At1g70410 | carbonic anhydrase, putative;      | 0 | 1.06  | 1.24  | 0.83  | 0.30  | -0.09 | -0.12 | 1.2 | 0.06 | 0.63  | 2.10  |
| A002672_01 | At1g20670 | hypothetical protein; protein ic   | 0 | 0.31  | 0.49  | 0.48  | 0.83  | 0.93  | 1.07  | 0.8 | 0.81 | -1.91 | -0.90 |
| A002674_01 | At1g67900 | unknown protein; protein id: A     | 0 | -0.04 | 0.31  | 0.70  | 1.00  | 1.19  | 0.74  | 0.7 | 1.61 | -1.57 | -1.25 |
| A002676_01 | At1g61810 | glycosyl hydrolase family 1; p     | 0 | 2.29  | 3.06  | 3.18  | 2.85  | 2.57  | 2.54  | 1.2 | 0.06 | -1.64 | 0.95  |
| A002677_01 | At1g61890 | expressed protein; protein id:     | 0 | 0.74  | 0.77  | 0.14  | -0.61 | -1.01 | -0.92 | 1.4 | 0.06 | 1.61  | 1.82  |
| A002695_01 | At1g56340 | calreticulin (crt1); protein id: A | 0 | -1.54 | -1.34 | -1.57 | -2.15 | -2.04 | -2.40 | 1.1 | 0.14 | 2.74  | -0.29 |
| A002702_01 | At1g15100 | putative RING-H2 zinc finger       | 0 | 0.77  | 0.95  | 1.38  | 1.34  | 1.43  | 1.75  | 0.9 | 0.41 | -2.01 | -0.30 |
| A002732_01 | At1g73680 | feebly-like protein; protein id:   | 0 | 1.02  | 1.16  | 1.27  | 1.34  | 1.17  | 1.29  | 0.8 | 0.66 | -1.87 | 0.61  |
| A002736_01 | At1g29760 | hypothetical protein; protein ic   | 0 | 1.09  | 0.93  | 0.78  | 0.92  | 1.23  | 1.13  | 0.7 | 0.96 | -1.73 | 0.58  |
| A002737_01 | At1g28580 | lipase, putative; protein id: At   | 0 | 1.07  | 1.38  | 1.29  | 1.13  | 1.22  | 1.52  | 0.9 | 0.37 | -1.85 | 0.70  |
| A002741_01 | At1g72610 | germin-like protein; protein id    | 0 | -0.14 | -0.60 | -1.51 | -2.39 | -2.64 | -2.14 | 0.8 | 0.66 | 2.44  | 0.98  |
| A002762_01 | At1g52880 | NAM-like protein; protein id: A    | 0 | 1.44  | 2.25  | 3.00  | 3.17  | 3.27  | 3.55  | 2.1 | 0.06 | -2.03 | -0.39 |
| A002774_01 | At1g61790 | hypothetical protein; protein ic   | 0 | -0.75 | -0.80 | -0.74 | -0.79 | -0.87 | -1.25 | 1.2 | 0.06 | 2.66  | -0.63 |
| A002779_01 | At1g69740 | putative aminolevulinate dehy      | 0 | -0.43 | -0.39 | -0.65 | -0.72 | -0.91 | -1.04 | 0.6 | 2.21 | 2.68  | 0.34  |
| A002782_01 | At1g67950 | RRM-containing protein; prote      | 0 | -1.02 | -1.29 | -1.59 | -1.62 | -1.26 | NA    | 0.7 | 1.61 | NA    | NA    |
| A002787_01 | At1g52300 | 60S ribosomal protein L37, pu      | 0 | -0.62 | -1.08 | -1.06 | -1.59 | -1.90 | -1.97 | 1.0 | 0.18 | 2.74  | 0.37  |
| A002788_01 | At1g17550 | protein phosphatase 2C, puta       | 0 | 0.40  | 0.69  | 0.97  | 1.09  | 1.20  | 1.50  | 1.2 | 0.06 | -1.98 | -0.78 |
| A002793_01 | At1g54070 | unknown protein; protein id: A     | 0 | 0.28  | 0.65  | 1.00  | 0.98  | 1.19  | 1.54  | 0.8 | 0.81 | -1.91 | -0.90 |
| A002797_01 | At1g54710 | expressed protein; protein id:     | 0 | 1.12  | 1.19  | 1.00  | 0.80  | 0.88  | 1.38  | 0.8 | 0.48 | -1.54 | 1.05  |

|            |           |                                  |   |       |       |       |       |       |       |     |      |       |       |
|------------|-----------|----------------------------------|---|-------|-------|-------|-------|-------|-------|-----|------|-------|-------|
| A002798_01 | At1g53570 | MAP3K alpha protein kinase,      | 0 | 1.27  | 1.77  | 1.77  | 1.75  | 1.79  | 1.98  | 1.2 | 0.06 | -1.93 | 0.44  |
| A002800_01 | At1g76150 | hypothetical protein; protein ic | 0 | 0.96  | 0.93  | 0.95  | 0.90  | 0.94  | 1.25  | 0.6 | 4.47 | -1.85 | 0.62  |
| A002818_01 | At1g21920 | phosphatidylinositol-4-phosph    | 0 | 0.78  | 1.14  | 2.11  | 2.56  | 2.38  | 2.88  | 1.9 | 0.06 | -1.94 | -0.90 |
| A002834_01 | At1g10500 | unknown protein; protein id: A   | 0 | 0.89  | 1.27  | 1.37  | 1.67  | 1.67  | 1.99  | 1.8 | 0.06 | -2.06 | -0.28 |
| A002838_01 | At1g08980 | expressed protein; protein id:   | 0 | 1.09  | 0.97  | 0.79  | 0.72  | 1.11  | -0.16 | 0.6 | 4.47 | -0.15 | 1.33  |
| A002842_01 | At1g16340 | putative 3-deoxy-D-manno-2-      | 0 | -0.54 | -1.14 | -1.21 | -1.10 | -1.19 | -1.79 | 1.4 | 0.06 | 2.66  | -0.14 |
| A002854_01 | At1g80310 | putative sulfate transporter; p  | 0 | 1.15  | 1.75  | 2.15  | 2.65  | 2.83  | 2.68  | 1.9 | 0.06 | -2.03 | -0.51 |
| A002855_01 | At1g32700 | expressed protein; protein id:   | 0 | 1.70  | 1.63  | 1.64  | 2.02  | 2.10  | 2.11  | 1.1 | 0.10 | -1.97 | 0.34  |
| A002871_01 | At1g34300 | hypothetical protein; protein ic | 0 | 0.91  | 0.87  | 1.03  | 1.25  | 1.38  | 0.97  | 0.8 | 0.96 | -1.85 | 0.17  |
| A002898_01 | At1g34630 | hypothetical protein; protein ic | 0 | 0.48  | 0.76  | 0.84  | 1.11  | 1.24  | 1.29  | 1.0 | 0.26 | -2.03 | -0.62 |
| A002917_01 | At1g68620 | expressed protein; protein id:   | 0 | 3.00  | 2.92  | 2.31  | 1.81  | 1.79  | 2.12  | 1.0 | 0.16 | -1.00 | 1.81  |
| A002922_01 | At1g80830 | metal ion transporter; protein   | 0 | 0.36  | 1.08  | 1.28  | 1.63  | 1.65  | 2.04  | 1.2 | 0.06 | -1.95 | -0.87 |
| A002923_01 | At1g74940 | expressed protein; protein id:   | 0 | 0.29  | 0.37  | 0.71  | 1.31  | 0.84  | 0.78  | 0.9 | 0.27 | -1.62 | -0.85 |
| A002950_01 | At1g52590 | expressed protein; protein id:   | 0 | 0.69  | 1.35  | 1.38  | 1.79  | 1.88  | 1.80  | 1.3 | 0.06 | -2.02 | -0.42 |
| A002997_01 | At1g56140 | similar to receptor-like protein | 0 | 0.17  | 0.36  | 0.39  | 0.90  | 1.02  | 0.89  | 0.8 | 0.66 | -1.81 | -1.20 |
| A002999_01 | At1g56580 | expressed protein; protein id:   | 0 | -1.70 | -1.88 | -1.49 | -2.28 | -2.38 | -2.10 | 0.8 | 0.48 | 2.71  | -0.75 |
| A003004_01 | At1g77930 | expressed protein; protein id:   | 0 | 0.73  | 1.09  | 1.13  | 1.35  | 1.56  | 1.69  | 0.8 | 0.66 | -2.06 | -0.37 |
| A003016_01 | At1g55000 | expressed protein; protein id:   | 0 | 0.74  | 0.70  | 0.74  | 1.20  | 1.42  | 1.09  | 0.9 | 0.27 | -1.86 | -0.42 |
| A003018_01 | At1g70810 | expressed protein; protein id:   | 0 | 0.82  | 1.59  | 2.01  | 2.54  | 3.02  | 3.46  | 0.9 | 0.41 | -1.96 | -0.92 |
| A003084_01 | At1g05340 | expressed protein; protein id:   | 0 | 2.81  | 2.56  | 2.21  | 2.07  | 2.34  | 2.83  | 1.0 | 0.16 | -1.58 | 1.08  |
| A003092_01 | At1g17710 | hypothetical protein; protein ic | 0 | -0.22 | 0.18  | 0.47  | 0.38  | 0.37  | 1.21  | 0.8 | 0.81 | -1.23 | -1.45 |
| A003101_01 | At1g06550 | 3-hydroxyisobutyryl-coenzyme     | 0 | -1.67 | -1.81 | -1.40 | -0.30 | -0.77 | -1.45 | 0.7 | 2.21 | 1.29  | -2.07 |
| A003114_01 | At1g19450 | integral membrane protein, p     | 0 | 1.16  | 1.56  | 1.25  | 1.21  | 0.93  | 1.31  | 0.9 | 0.31 | -1.44 | 1.26  |
| A003121_01 | At1g55110 | zinc finger protein, putative; p | 0 | 1.01  | 0.93  | 0.81  | 0.52  | 0.82  | 0.97  | 0.8 | 0.66 | -1.34 | 1.25  |
| A003134_01 | At1g26440 | fatty acid elongase 3-ketoacy    | 0 | 0.75  | 0.62  | 0.65  | 0.98  | 1.12  | 1.01  | 0.9 | 0.27 | -1.84 | -0.20 |
| A003138_01 | At1g78570 | dTDP-glucose 4,6-dehydratas      | 0 | -1.24 | -1.21 | -1.29 | -1.89 | -2.31 | -2.07 | 1.1 | 0.10 | 2.70  | 0.02  |
| A003141_01 | At1g21065 | expressed protein; protein id:   | 0 | 0.53  | 1.17  | 1.30  | 1.82  | 1.89  | 1.92  | 1.4 | 0.06 | -1.99 | -0.73 |
| A003154_01 | At1g61870 | expressed protein; protein id:   | 0 | -1.17 | -1.36 | -1.35 | -1.85 | -2.31 | -2.35 | 2.0 | 0.06 | 2.76  | 0.03  |
| A003181_01 | At1g72090 | expressed protein; protein id:   | 0 | -0.47 | -0.63 | -0.80 | -1.32 | -1.07 | -1.33 | 0.7 | 2.21 | 2.69  | 0.34  |
| A003186_01 | At1g67070 | phosphomannose isomerase         | 0 | 2.18  | 1.90  | 1.30  | 0.19  | 1.40  | 1.47  | 1.0 | 0.16 | -0.49 | 1.59  |
| A003242_01 | At1g80300 | adenine nucleotide translocas    | 0 | -0.29 | 0.10  | 0.49  | 0.82  | 1.01  | 1.53  | 1.1 | 0.14 | -1.45 | -1.73 |
| A003250_01 | At1g07650 | leucine-rich repeat transmem     | 0 | 0.51  | 0.14  | -0.24 | -0.72 | -1.07 | -0.87 | 1.2 | 0.06 | 2.00  | 1.60  |
| A003287_01 | At1g56505 | hypothetical protein; protein ic | 0 | 0.59  | 1.12  | 1.14  | 1.12  | 1.00  | 1.03  | 0.8 | 0.55 | -1.77 | 0.39  |
| A003294_01 | At1g19570 | dehydroascorbate reductase,      | 0 | -0.67 | -0.69 | -0.72 | -1.20 | -1.46 | -1.24 | 0.9 | 0.37 | 2.54  | 0.26  |
| A003329_01 | At1g63090 | unknown protein; protein id: A   | 0 | 0.16  | 0.39  | 0.50  | 0.79  | 0.85  | 1.14  | 0.9 | 0.27 | -1.87 | -1.09 |
| A003337_01 | At1g52760 | putative lipase; protein id: At1 | 0 | 0.79  | 0.62  | 0.80  | 1.95  | 1.55  | 0.66  | 0.8 | 0.48 | -1.34 | -0.34 |
| A003351_01 | At1g77770 | unknown protein; protein id: A   | 0 | 0.75  | 0.73  | 0.63  | 0.62  | 0.45  | 1.13  | 0.7 | 1.20 | -1.47 | 0.70  |
| A003359_01 | At1g30720 | FAD-linked oxidoreductase fa     | 0 | -0.77 | -1.00 | -1.02 | -1.91 | -1.45 | NA    | 0.7 | 2.21 | NA    | NA    |
| A003360_01 | At1g70600 | 60S ribosomal protein L27A; j    | 0 | -0.54 | -0.81 | -0.80 | -1.54 | -1.82 | -1.81 | 0.9 | 0.27 | 2.63  | 0.59  |
| A003389_01 | At1g68560 | glycosyl hydrolase family 31 (   | 0 | -0.47 | -0.57 | -0.93 | -1.94 | -2.46 | -2.39 | 0.8 | 0.66 | 2.50  | 0.90  |
| A003404_01 | At1g28230 | purine permease; protein id: A   | 0 | 0.75  | 0.98  | 0.91  | 0.89  | 1.29  | 0.45  | 0.8 | 0.96 | -1.27 | 0.65  |
| A003409_01 | At1g21560 | hypothetical protein; protein ic | 0 | -0.72 | -0.81 | -0.86 | -0.69 | -0.95 | -1.19 | 0.9 | 0.41 | 2.65  | -0.70 |
| A003418_01 | At1g56570 | hypothetical protein; protein ic | 0 | -0.16 | 0.19  | 0.41  | 0.98  | 1.09  | 0.84  | 0.8 | 0.96 | -1.51 | -1.64 |
| A003431_01 | At1g06460 | heat shock protein, putative; p  | 0 | 1.03  | 1.55  | 1.74  | 2.02  | 2.09  | 1.44  | 0.9 | 0.41 | -1.84 | 0.05  |

|            |           |                                   |   |       |       |       |       |       |       |     |      |       |       |
|------------|-----------|-----------------------------------|---|-------|-------|-------|-------|-------|-------|-----|------|-------|-------|
| A003434_01 | At1g15350 | expressed protein; protein id:    | 0 | 0.73  | 1.03  | 1.33  | 1.57  | 1.77  | 1.70  | 1.6 | 0.06 | -2.04 | -0.54 |
| A003475_01 | At1g80920 | J8-like protein; protein id: At1  | 0 | 2.03  | 1.59  | 1.72  | 2.04  | 1.70  | 2.17  | 1.0 | 0.16 | -1.75 | 0.72  |
| A003480_01 | At1g56660 | hypothetical protein; protein ic  | 0 | 0.81  | 1.44  | 1.36  | 1.32  | 0.72  | 0.95  | 0.6 | 4.47 | -1.25 | 1.04  |
| A003486_01 | At1g76710 | unknown protein; protein id: A    | 0 | -0.27 | -0.88 | -0.99 | -0.85 | -1.14 | -1.32 | 1.2 | 0.06 | 2.65  | 0.13  |
| A003497_01 | At1g22140 | expressed protein; protein id:    | 0 | 0.25  | 0.64  | 0.78  | 1.15  | 0.99  | 1.21  | 1.5 | 0.06 | -1.94 | -0.82 |
| A003503_01 | At1g22070 | bZIP transcription factor, TGA    | 0 | 0.14  | 0.60  | 0.69  | 1.12  | 1.19  | 1.05  | 1.1 | 0.14 | -1.86 | -1.05 |
| A003510_01 | At1g10140 | expressed protein; protein id:    | 0 | 2.09  | 2.02  | 1.77  | 1.42  | 1.31  | 1.44  | 1.0 | 0.20 | -1.07 | 1.77  |
| A003518_01 | At1g79380 | expressed protein; protein id:    | 0 | 1.16  | 1.34  | 1.14  | 1.21  | 1.27  | 1.36  | 0.9 | 0.27 | -1.84 | 0.83  |
| A003523_01 | At1g07220 | hypothetical protein; protein ic  | 0 | -1.04 | -1.14 | -1.19 | -1.52 | -1.45 | -1.34 | 1.2 | 0.06 | 2.72  | -0.66 |
| A003528_01 | At1g76520 | expressed protein; protein id:    | 0 | 0.34  | 0.69  | 0.82  | 1.08  | 1.21  | 1.24  | 1.0 | 0.16 | -1.99 | -0.82 |
| A003530_01 | At1g64950 | cytochrome p450, putative; pr     | 0 | 0.45  | 0.84  | 0.92  | 0.93  | 1.23  | 1.49  | 1.0 | 0.26 | -1.98 | -0.54 |
| A003533_01 | At1g78140 | expressed protein; protein id:    | 0 | 0.37  | 0.74  | 0.61  | 0.91  | 1.06  | 1.02  | 1.1 | 0.10 | -2.02 | -0.50 |
| A003536_01 | At1g35490 | bZIP family transcription factc   | 0 | 0.52  | 0.78  | 0.98  | 1.02  | 0.83  | 1.44  | 0.7 | 1.61 | -1.88 | -0.22 |
| A003537_01 | At1g63800 | E2, ubiquitin-conjugating enzy    | 0 | 1.43  | 1.57  | 1.75  | 2.20  | 2.23  | 2.16  | 1.9 | 0.06 | -2.02 | -0.07 |
| A003538_01 | At1g03610 | expressed protein; protein id:    | 0 | 1.57  | 1.55  | 1.47  | 1.43  | 1.48  | 1.45  | 1.3 | 0.06 | -1.66 | 1.13  |
| A003540_01 | At1g14420 | pectate lyase, putative; protei   | 0 | 0.53  | 0.80  | 1.30  | 1.24  | 1.25  | 1.81  | 0.7 | 0.96 | -1.92 | -0.59 |
| A003544_01 | At1g16720 | unknown protein; protein id: A    | 0 | 1.31  | 1.24  | 1.21  | 0.93  | 1.24  | 0.87  | 0.9 | 0.26 | -1.26 | 1.42  |
| A003547_01 | At1g71790 | actin capping protein beta-2, j   | 0 | -0.22 | -0.80 | -0.71 | -1.12 | -1.23 | -1.46 | 0.9 | 0.27 | 2.68  | 0.50  |
| A003556_01 | At1g34000 | expressed protein; protein id:    | 0 | 0.86  | 1.12  | 1.06  | 1.31  | 1.23  | 1.13  | 0.9 | 0.27 | -1.92 | 0.41  |
| A003567_01 | At1g64660 | methionine/cystathionine garr     | 0 | 1.47  | 0.71  | 0.17  | -0.66 | -0.68 | -0.35 | 1.1 | 0.10 | 1.38  | 1.87  |
| A003576_01 | At1g04770 | hypothetical protein; protein ic  | 0 | -0.48 | 0.11  | 1.06  | 1.18  | 1.04  | 2.39  | 1.0 | 0.20 | -1.38 | -1.65 |
| A003588_01 | At1g06960 | small nuclear ribonucleoprote     | 0 | -0.42 | -0.72 | -0.88 | -0.88 | -0.79 | -1.16 | 0.8 | 0.48 | 2.73  | -0.16 |
| A003604_01 | At1g70610 | ABC transporter family protei     | 0 | 0.81  | 1.06  | 0.74  | 0.60  | 0.74  | 1.01  | 0.9 | 0.27 | -1.50 | 1.11  |
| A003606_01 | At1g70590 | expressed protein; protein id:    | 0 | 0.80  | 0.78  | 0.87  | 1.02  | 1.27  | 1.22  | 1.0 | 0.16 | -2.01 | -0.09 |
| A003614_01 | At1g33050 | unknown protein; protein id: A    | 0 | 1.40  | 1.36  | 1.35  | 1.44  | 1.39  | 1.60  | 0.8 | 0.96 | -1.85 | 0.75  |
| A003617_01 | At1g32930 | Avr9 elicitor response protein    | 0 | -0.46 | -0.95 | -0.99 | -0.80 | -1.06 | -1.42 | 0.9 | 0.41 | 2.67  | -0.14 |
| A003636_01 | At1g05840 | expressed protein; protein id:    | 0 | 1.14  | 1.09  | 1.09  | 1.12  | 1.62  | 0.84  | 0.7 | 1.61 | -1.52 | 0.62  |
| A003637_01 | At1g16920 | GTP binding protein, putative     | 0 | -0.89 | -1.52 | -1.59 | -1.94 | -2.27 | -2.64 | 1.2 | 0.06 | 2.78  | 0.12  |
| A003647_01 | At1g72970 | expressed protein; protein id:    | 0 | -1.79 | -2.75 | -2.91 | -3.78 | -3.88 | -3.69 | 1.1 | 0.10 | 2.79  | -0.12 |
| A003653_01 | At1g08130 | ligase I, putative; protein id: A | 0 | -1.41 | -1.45 | -1.16 | -1.26 | -1.23 | -1.45 | 0.9 | 0.27 | 2.42  | -1.48 |
| A003660_01 | At1g07770 | ribosomal protein S15; proteir    | 0 | -0.64 | -1.06 | -1.00 | -1.32 | -1.68 | -1.88 | 1.4 | 0.06 | 2.77  | 0.19  |
| A003673_01 | At1g16780 | vacuolar-type H+translocating     | 0 | -0.72 | -0.89 | -1.00 | -1.09 | -1.16 | -1.24 | 0.8 | 0.66 | 2.81  | -0.42 |
| A003675_01 | At1g70520 | putative protein kinase; protei   | 0 | 1.27  | 1.61  | 1.49  | 1.40  | 1.06  | 0.90  | 0.8 | 0.55 | -1.17 | 1.44  |
| A003679_01 | At1g70480 | expressed protein; protein id:    | 0 | -0.06 | -0.34 | -0.37 | -0.66 | -1.01 | -0.69 | 0.8 | 0.96 | 2.46  | 0.80  |
| A003690_01 | At1g59990 | DEAD/DEAH box RNA helica          | 0 | -1.47 | -1.46 | -1.44 | -1.40 | -1.44 | NA    | 0.7 | 1.20 | NA    | NA    |
| A003691_01 | At1g10900 | phosphatidylinositol-4-phosph     | 0 | -0.31 | 0.12  | 0.58  | 1.23  | 1.34  | 1.51  | 1.3 | 0.06 | -1.53 | -1.74 |
| A003694_01 | At1g17880 | transcription factor, putative; j | 0 | -0.82 | -1.15 | -1.10 | -1.53 | -1.56 | -1.68 | 1.1 | 0.10 | 2.81  | -0.12 |
| A003698_01 | At1g30520 | hypothetical protein; protein ic  | 0 | -0.06 | -0.68 | -0.99 | -1.31 | -1.28 | -1.47 | 1.1 | 0.10 | 2.57  | 0.66  |
| A003703_01 | At1g48320 | hypothetical protein; protein ic  | 0 | 1.05  | 1.56  | 1.52  | 2.24  | 2.24  | 1.95  | 1.1 | 0.10 | -2.00 | -0.27 |
| A003720_01 | At1g72430 | expressed protein; protein id:    | 0 | 0.44  | 1.18  | 1.36  | 1.40  | 1.56  | 1.55  | 1.2 | 0.06 | -1.90 | -0.40 |
| A003736_01 | At1g68230 | unknown protein; protein id: A    | 0 | 1.38  | 1.50  | 0.87  | 0.52  | -0.46 | -0.18 | 1.2 | 0.06 | 0.78  | 2.08  |
| A003737_01 | At1g68170 | MtN21-like protein; protein id:   | 0 | -0.58 | -0.37 | 0.04  | 0.45  | 0.84  | 1.16  | 1.0 | 0.16 | -1.04 | -2.09 |
| A003743_01 | At1g51490 | glycosyl hydrolase family 1; p    | 0 | -0.21 | 0.00  | 0.43  | 0.50  | 0.53  | 1.06  | 0.8 | 0.81 | -1.41 | -1.62 |
| A003750_01 | At1g47270 | F-box containing tubby family     | 0 | -0.10 | 0.02  | 0.40  | 0.61  | 0.86  | 1.18  | 0.9 | 0.27 | -1.49 | -1.68 |

|            |           |                                  |   |       |       |       |       |       |       |     |      |       |       |
|------------|-----------|----------------------------------|---|-------|-------|-------|-------|-------|-------|-----|------|-------|-------|
| A003804_01 | At1g15960 | metal ion transporter, putative  | 0 | 0.21  | 0.99  | 1.35  | 2.19  | 1.82  | 0.85  | 1.0 | 0.18 | -1.41 | -0.64 |
| A003817_01 | At1g62280 | hypothetical protein; protein ic | 0 | -1.09 | -1.77 | -1.66 | -1.70 | -1.49 | -0.84 | 0.8 | 0.81 | 2.06  | -1.35 |
| A003844_01 | At1g52040 | myosinase-binding protein h      | 0 | -3.29 | -4.06 | -3.38 | -5.41 | -5.44 | -4.95 | 0.9 | 0.41 | 2.76  | -0.40 |
| A003851_01 | xxxx      | b/t tRNA-Arg;protein id: At1g    | 0 | 0.95  | 1.48  | 1.14  | 0.84  | 0.31  | 1.31  | 0.9 | 0.26 | -0.92 | 1.30  |
| A003860_01 | At1g70350 | hypothetical protein; protein ic | 0 | -0.81 | -1.00 | -0.79 | -1.10 | -1.13 | -1.23 | 0.8 | 0.81 | 2.76  | -0.62 |
| A003863_01 | At1g53230 | flower development protein c     | 0 | -1.05 | -0.77 | -1.00 | -1.43 | -1.11 | -1.63 | 0.9 | 0.27 | 2.63  | -0.33 |
| A003869_01 | At1g09180 | putative GTP-binding protein,    | 0 | 0.54  | 0.79  | 0.95  | 0.97  | 1.19  | 1.58  | 0.9 | 0.31 | -1.97 | -0.48 |
| A003889_01 | At1g78680 | gamma glutamyl hydrolase, p      | 0 | 0.95  | 1.23  | 0.88  | 0.45  | 0.16  | -0.04 | 1.1 | 0.10 | 0.35  | 2.01  |
| A003915_01 | At1g31170 | expressed protein; protein id:   | 0 | 0.51  | 0.88  | 1.01  | 1.38  | 1.32  | 1.24  | 1.0 | 0.18 | -2.00 | -0.49 |
| A003921_01 | At1g61570 | expressed protein; protein id:   | 0 | -0.88 | -0.99 | -0.84 | -1.18 | -1.30 | -1.21 | 0.9 | 0.26 | 2.75  | -0.56 |
| A003925_01 | At1g54130 | RSH3 (RelA/SpoT homolog);        | 0 | 0.84  | 0.98  | 0.89  | 1.09  | 0.91  | 1.40  | 0.9 | 0.27 | -1.93 | 0.31  |
| A003933_01 | xxxx      | b/t hypothetical protein; protei | 0 | 0.56  | 0.93  | 1.44  | 1.46  | 1.44  | 2.07  | 0.8 | 0.66 | -1.95 | -0.68 |
| A003952_01 | At1g16350 | putative inosine-5-monophos      | 0 | -0.91 | -1.23 | -1.33 | -1.13 | -1.10 | NA    | 0.6 | 2.21 | NA    | NA    |
| A003959_01 | At1g13970 | hypothetical protein; protein ic | 0 | 0.33  | 0.60  | 1.00  | 1.01  | 1.17  | 1.63  | 1.0 | 0.16 | -1.89 | -0.90 |
| A003960_01 | At1g14130 | dioxygenase-like protein; prot   | 0 | 1.72  | 1.43  | 1.76  | 1.90  | 2.56  | 3.01  | 1.0 | 0.16 | -1.88 | -0.31 |
| A003969_01 | At1g15270 | expressed protein; protein id:   | 0 | -0.14 | 0.24  | 0.41  | 1.02  | 0.74  | 1.15  | 0.7 | 0.96 | -1.58 | -1.53 |
| A003974_01 | At1g21790 | expressed protein; protein id:   | 0 | 0.71  | 0.65  | 0.77  | 1.10  | 1.09  | 0.97  | 0.7 | 0.96 | -1.97 | -0.12 |
| A003979_01 | At1g47640 | expressed protein; protein id:   | 0 | -0.26 | -0.42 | -0.58 | -0.66 | -0.93 | -1.06 | 0.7 | 2.21 | 2.66  | 0.51  |
| A003982_01 | At1g47410 | hypothetical protein; protein ic | 0 | -0.43 | -0.38 | 0.00  | 1.23  | 1.17  | 0.33  | 0.7 | 1.20 | -0.89 | -1.82 |
| A003989_01 | At1g11210 | expressed protein; protein id:   | 0 | 1.93  | 2.04  | 2.33  | 2.53  | 2.37  | 1.96  | 1.1 | 0.10 | -1.83 | 0.60  |
| A003997_01 | At1g80170 | polygalacturonase, putative; p   | 0 | -0.69 | -0.38 | -0.04 | 1.28  | 1.38  | 0.86  | 1.3 | 0.06 | -1.06 | -2.02 |
| A004038_01 | At1g35190 | hyoscyamine 6-dioxygenase l      | 0 | 0.07  | 0.25  | 0.45  | 0.89  | 0.98  | 1.30  | 0.7 | 1.61 | -1.65 | -1.45 |
| A004048_01 | At1g18470 | expressed protein; protein id:   | 0 | 1.41  | 1.55  | 1.53  | 1.27  | 0.87  | 1.13  | 0.7 | 0.96 | -1.17 | 1.61  |
| A004107_01 | At1g26560 | glycosyl hydrolase family 1; p   | 0 | 0.76  | 1.35  | 1.12  | 0.72  | 0.39  | 0.34  | 1.0 | 0.16 | -0.30 | 1.60  |
| A004151_01 | At1g33110 | unknown protein; protein id: A   | 0 | 1.08  | 1.04  | 1.01  | 1.10  | 1.37  | 1.45  | 0.7 | 1.20 | -1.93 | 0.27  |
| A004165_01 | At1g01240 | expressed protein; protein id:   | 0 | 1.48  | 1.72  | 1.86  | 2.32  | 2.24  | 2.35  | 1.6 | 0.06 | -2.05 | 0.02  |
| A004173_01 | At1g29800 | unknown protein; protein id: A   | 0 | 1.08  | 0.94  | 0.96  | 1.01  | 0.95  | 1.27  | 1.0 | 0.16 | -1.78 | 0.71  |
| A004242_01 | At1g34030 | ribosomal protein S18, putativ   | 0 | -0.70 | -0.79 | -0.78 | -1.20 | -1.14 | -1.61 | 0.7 | 1.20 | 2.70  | 0.07  |
| A004243_01 | At1g26800 | expressed protein; protein id:   | 0 | 1.94  | 1.75  | 1.80  | 2.01  | 1.85  | 1.74  | 1.1 | 0.14 | -1.71 | 0.93  |
| A004244_01 | At1g71240 | hypothetical protein; protein ic | 0 | 0.88  | 1.29  | 1.33  | 1.35  | 1.47  | 1.73  | 1.1 | 0.14 | -2.04 | 0.03  |
| A004272_01 | At1g73630 | putative calmodulin; protein ic  | 0 | 0.35  | 0.94  | 1.22  | 1.49  | 1.58  | 2.01  | 1.2 | 0.06 | -1.94 | -0.91 |
| A004276_01 | At1g03660 | unknown; protein id: At1g036     | 0 | 2.84  | 2.83  | 3.06  | 2.71  | 2.45  | 2.46  | 0.9 | 0.27 | -1.55 | 1.26  |
| A004284_01 | At1g63290 | putative D-ribulose-5-phosph     | 0 | -1.09 | -1.66 | -1.92 | -2.54 | -2.96 | -2.73 | 1.3 | 0.06 | 2.76  | 0.16  |
| A004285_01 | At1g63270 | ABC transporter family protei    | 0 | 0.36  | 0.93  | 1.52  | 1.69  | 2.21  | 2.95  | 2.1 | 0.06 | -1.80 | -1.18 |
| A004305_01 | At1g13670 | unknown protein; protein id: A   | 0 | 0.47  | 0.74  | 1.17  | 1.23  | 1.47  | 1.83  | 1.0 | 0.16 | -1.95 | -0.87 |
| A004314_01 | At1g35970 | hypothetical protein; protein ic | 0 | 0.71  | 1.99  | 3.58  | 4.23  | 4.90  | 5.09  | 1.1 | 0.10 | -1.88 | -1.16 |
| A004320_01 | At1g32480 | NAD+ dependent isocitrate de     | 0 | -2.58 | -2.85 | -1.90 | -3.67 | -3.98 | -3.11 | 1.4 | 0.06 | 2.68  | -0.61 |
| A004398_01 | At1g69870 | putative peptide transporter; p  | 0 | 0.69  | 0.94  | 0.71  | 0.60  | 0.71  | 1.10  | 1.0 | 0.18 | -1.63 | 0.76  |
| A004404_01 | At1g66670 | ATP-dependent Clp protease       | 0 | -0.70 | -0.16 | 0.66  | 1.30  | 1.63  | 1.64  | 2.6 | 0.06 | -1.34 | -1.95 |
| A004413_01 | At1g19000 | myb family transcription facto   | 0 | 0.81  | 0.90  | 0.96  | 1.03  | 0.93  | 0.87  | 0.7 | 2.21 | -1.74 | 0.76  |
| A004424_01 | At1g06380 | hypothetical protein; protein ic | 0 | -0.50 | -0.56 | -0.46 | -0.82 | -1.21 | -0.86 | 0.6 | 2.21 | 2.59  | 0.15  |
| A004431_01 | At1g08630 | expressed protein; protein id:   | 0 | 1.76  | 0.86  | 0.14  | 0.10  | -0.01 | -0.31 | 1.3 | 0.06 | 0.98  | 1.80  |
| A004437_01 | At1g80440 | expressed protein; protein id:   | 0 | 2.13  | 2.23  | 2.49  | 2.65  | 2.58  | 2.48  | 1.1 | 0.14 | -1.93 | 0.53  |
| A004442_01 | At1g52080 | expressed protein; protein id:   | 0 | 0.11  | 0.83  | 1.13  | 1.83  | 1.81  | 2.44  | 0.7 | 1.20 | -1.79 | -1.28 |



|            |           |                                  |   |       |       |       |       |       |       |     |      |       |       |
|------------|-----------|----------------------------------|---|-------|-------|-------|-------|-------|-------|-----|------|-------|-------|
| A004454_01 | At1g57720 | elongation factor 1B-gamma,      | 0 | -0.81 | -1.02 | -0.96 | -1.47 | -1.47 | -1.33 | 0.8 | 0.96 | 2.77  | -0.24 |
| A004458_01 | At1g52870 | expressed protein; protein id:   | 0 | 1.19  | 1.93  | 2.16  | 2.56  | 2.48  | 2.30  | 1.8 | 0.06 | -2.00 | -0.15 |
| A004469_01 | At1g08230 | hypothetical protein; protein ic | 0 | -0.30 | -0.18 | -0.15 | -1.20 | -0.54 | 0.21  | 0.8 | 0.81 | 1.04  | -0.47 |
| A004470_01 | At1g19720 | DYW7 protein; protein id: At1    | 0 | 0.41  | 0.58  | 0.54  | 0.95  | 0.98  | 1.25  | 0.6 | 2.21 | -1.96 | -0.77 |
| A004484_01 | At1g79670 | WAK-like kinase (WLK); prote     | 0 | 0.12  | 0.41  | 0.46  | 0.97  | 1.04  | 0.93  | 0.8 | 0.81 | -1.80 | -1.21 |
| A004491_01 | At1g36980 | expressed protein; protein id:   | 0 | 0.76  | 0.90  | 1.00  | 1.32  | 1.22  | 1.18  | 1.4 | 0.06 | -2.02 | -0.05 |
| A004495_01 | At1g68520 | CONSTANS B-box zinc finge        | 0 | 1.71  | 2.15  | 1.95  | 1.85  | 1.40  | 1.21  | 1.3 | 0.06 | -1.16 | 1.47  |
| A004497_01 | At1g26650 | expressed protein; protein id:   | 0 | -0.54 | -0.52 | -0.70 | -0.79 | -1.20 | -1.22 | 0.8 | 0.55 | 2.67  | 0.26  |
| A004511_01 | At1g15740 | expressed protein; protein id:   | 0 | 1.60  | 1.46  | 1.39  | 1.36  | 1.23  | 1.47  | 0.8 | 0.81 | -1.56 | 1.23  |
| A004526_01 | At1g64790 | hypothetical protein; protein ic | 0 | -0.63 | -0.82 | -0.84 | -1.09 | -1.42 | -1.00 | 1.0 | 0.18 | 2.68  | -0.15 |
| A004545_01 | At1g26670 | V-SNARE protein AtVTI1b, pu      | 0 | 0.90  | 0.97  | 1.14  | 1.64  | 1.56  | 1.53  | 1.2 | 0.06 | -2.02 | -0.29 |
| A004549_01 | xxxx      | b/t hypothetical protein; protei | 0 | -1.62 | -1.19 | -0.86 | -0.74 | -0.71 | -0.74 | 1.2 | 0.06 | 1.23  | -2.39 |
| A004557_01 | At1g09780 | putative 2,3-bisphosphoglyce     | 0 | -1.60 | -1.42 | -1.25 | -1.15 | -1.43 | -1.19 | 0.9 | 0.41 | 2.16  | -1.76 |
| A004587_01 | At1g78670 | gamma glutamyl hydrolase, p      | 0 | 1.95  | 2.85  | 3.19  | 3.29  | 3.48  | 3.42  | 2.1 | 0.06 | -2.02 | 0.06  |
| A004588_01 | At1g67920 | expressed protein; protein id:   | 0 | 1.56  | 2.18  | 2.85  | 3.13  | 3.43  | 3.53  | 1.8 | 0.06 | -2.06 | -0.43 |
| A004597_01 | At1g23390 | Kelch repeat containing F-bo     | 0 | 1.79  | 1.74  | 1.82  | 2.29  | 1.98  | 1.64  | 1.2 | 0.06 | -1.73 | 0.72  |
| A004603_01 | At1g79600 | expressed protein; protein id:   | 0 | 0.64  | 1.15  | 1.07  | 1.17  | 1.70  | 1.86  | 1.4 | 0.06 | -1.98 | -0.48 |
| A004612_01 | At1g67860 | expressed protein; protein id:   | 0 | 2.98  | 3.91  | 3.80  | 3.81  | 3.62  | 4.25  | 1.6 | 0.06 | -1.93 | 0.58  |
| A004618_01 | At1g11260 | glucose transporter; protein ic  | 0 | 2.55  | 2.44  | 2.08  | 1.62  | 1.31  | 1.26  | 0.8 | 0.96 | -0.66 | 1.98  |
| A004622_01 | At1g44970 | peroxidase, putative; protein i  | 0 | -3.15 | -4.26 | -4.32 | -6.11 | -4.39 | -4.14 | 1.1 | 0.14 | 2.55  | -0.69 |
| A004634_01 | At1g01720 | NAC domain protein, putative     | 0 | 1.21  | 1.61  | 1.79  | 1.86  | 1.95  | 2.93  | 0.8 | 0.55 | -1.96 | -0.29 |
| A004637_01 | At1g34430 | dihydrolipoamide S-acetyltran    | 0 | -0.84 | -1.14 | -1.10 | -1.24 | -1.40 | -1.50 | 0.8 | 0.81 | 2.80  | -0.42 |
| A004652_01 | At1g67830 | F12A21.4; protein id: At1g678    | 0 | -0.47 | -1.12 | -1.16 | -1.31 | -1.51 | -2.16 | 0.6 | 4.47 | 2.67  | 0.29  |
| A004682_01 | At1g09970 | leucine-rich repeat transmem     | 0 | 1.32  | 1.42  | 0.97  | 0.63  | 0.15  | 0.69  | 1.2 | 0.06 | -0.13 | 2.06  |
| A004683_01 | At1g14610 | valyl-tRNA synthetase, putativ   | 0 | -0.26 | -0.32 | -0.38 | -0.69 | -1.10 | -0.61 | 0.6 | 4.47 | 2.32  | 0.60  |
| A004684_01 | At1g08830 | copper/zinc superoxidase dis     | 0 | -0.94 | -1.68 | -1.63 | -2.60 | -2.94 | -2.47 | 2.0 | 0.06 | 2.72  | 0.19  |
| A004689_01 | At1g55260 | expressed protein; protein id:   | 0 | -0.45 | -0.50 | -0.88 | -1.36 | -2.27 | -2.67 | 1.4 | 0.06 | 2.36  | 0.91  |
| A004696_01 | At1g26150 | Pto kinase interactor, putative  | 0 | -0.04 | -0.17 | -0.52 | NA    | -1.28 | -1.14 | 1.0 | 0.20 | NA    | NA    |
| A004705_01 | At1g04440 | putative casein kinase I; prote  | 0 | 0.94  | 1.16  | 1.05  | 0.83  | 0.94  | 1.13  | 0.7 | 1.20 | -1.64 | 1.06  |
| A004722_01 | At1g62180 | 5'-adenylylphosphosulfate rec    | 0 | -0.30 | 0.32  | 0.70  | 0.37  | -0.09 | 1.01  | 0.7 | 1.61 | -0.82 | -0.72 |
| A004735_01 | At1g68580 | unknown protein; protein id: A   | 0 | 1.21  | 1.35  | 1.23  | 1.14  | 1.22  | 1.36  | 1.1 | 0.10 | -1.72 | 1.01  |
| A004739_01 | At1g14460 | hypothetical protein; protein ic | 0 | -0.39 | -0.50 | -1.33 | NA    | -1.40 | -0.93 | 0.7 | 1.61 | NA    | NA    |
| A004744_01 | At1g56330 | GTP-binding protein (SAR1B),     | 0 | -0.87 | -0.93 | -0.90 | -0.92 | -1.10 | -1.08 | 1.0 | 0.16 | 2.69  | -0.94 |
| A004748_01 | At1g44770 | unknown protein; protein id: A   | 0 | 0.94  | 0.64  | 0.81  | 0.89  | 0.85  | 1.17  | 0.7 | 1.61 | -1.76 | 0.34  |
| A004769_01 | At1g66200 | glutamine synthetase, putativ    | 0 | -0.03 | 0.50  | 0.86  | 0.98  | 0.95  | 1.60  | 1.0 | 0.20 | -1.71 | -1.22 |
| A004774_01 | At1g04970 | expressed protein; protein id:   | 0 | 1.16  | 1.34  | 1.32  | 1.37  | 1.13  | 1.56  | 0.8 | 0.96 | -1.84 | 0.72  |
| A004815_01 | At1g49740 | expressed protein; protein id:   | 0 | 0.76  | 1.10  | 0.97  | 0.78  | 0.78  | 1.08  | 0.8 | 0.55 | -1.64 | 0.94  |
| A004820_01 | At1g18080 | G-protein beta family; protein   | 0 | -0.66 | -0.95 | -1.00 | -1.64 | -1.76 | -1.60 | 0.6 | 2.21 | 2.72  | 0.29  |
| A004830_01 | At1g71980 | unknown protein; protein id: A   | 0 | 0.63  | 0.71  | 0.77  | 0.86  | 1.11  | 0.84  | 0.7 | 0.96 | -1.92 | 0.09  |
| A004839_01 | At1g32210 | defender against cell death pr   | 0 | -0.78 | -0.76 | -0.75 | -0.74 | -0.96 | -1.13 | 0.9 | 0.37 | 2.67  | -0.76 |
| A004843_01 | At1g05805 | bHLH protein; protein id: At1g   | 0 | 0.82  | 1.21  | 1.38  | 1.84  | 1.74  | 1.43  | 1.3 | 0.06 | -1.94 | -0.21 |
| A004846_01 | At1g07570 | protein kinase APK1A; proteir    | 0 | -0.11 | -0.90 | -1.15 | -1.33 | -1.35 | -1.23 | 0.8 | 0.96 | 2.51  | 0.32  |
| A004853_01 | At1g18800 | expressed protein; protein id:   | 0 | -0.89 | -0.79 | -0.66 | -1.05 | -1.35 | -1.21 | 1.3 | 0.06 | 2.58  | -0.26 |
| A004860_01 | At1g01140 | serine threonine kinase, putat   | 0 | 0.96  | 1.29  | 1.10  | 0.75  | 0.57  | 0.83  | 0.7 | 1.61 | -0.98 | 1.70  |

|            |               |                                  |   |       |       |       |       |       |       |     |      |       |       |
|------------|---------------|----------------------------------|---|-------|-------|-------|-------|-------|-------|-----|------|-------|-------|
| A004867_01 | At1g45150     | hypothetical protein; protein ic | 0 | 0.65  | 0.94  | 0.98  | 1.04  | 1.22  | 1.24  | 0.9 | 0.37 | -2.05 | -0.06 |
| A004882_01 | At1g17540     | receptor-like serine threonine   | 0 | -0.14 | 0.08  | 0.55  | 0.75  | 1.24  | 1.41  | 0.7 | 1.20 | -1.54 | -1.64 |
| A004896_01 | At1g09570     | putative phytochrome A; prote    | 0 | 1.07  | 0.99  | 0.99  | 1.07  | 0.91  | 1.15  | 1.2 | 0.06 | -1.72 | 0.97  |
| A004910_01 | At1g75330     | ornithine carbamoyltransferas    | 0 | -0.69 | -0.80 | -0.83 | -0.84 | -0.90 | -1.27 | 0.6 | 4.47 | 2.72  | -0.49 |
| A004915_01 | At1g60140     | trehalose-6-phosphate synthase   | 0 | 1.59  | 1.66  | 1.92  | 1.84  | 1.76  | 2.01  | 1.0 | 0.18 | -1.91 | 0.62  |
| A004927_01 | At3g49390     | RNA-binding protein, putative    | 0 | -1.06 | -1.07 | -1.09 | -1.07 | -1.07 | -1.05 | 0.6 | 2.21 | 2.51  | -1.37 |
| A004931_01 | At1g21000     | expressed protein; protein id:   | 0 | 1.52  | 1.89  | 2.32  | 2.60  | 2.89  | 3.27  | 1.4 | 0.06 | -2.06 | -0.36 |
| A004934_01 | At1g49670     | ARP protein, putative; protein   | 0 | 0.61  | 0.75  | 0.71  | 0.70  | 0.76  | 1.30  | 0.7 | 1.61 | -1.81 | -0.03 |
| A004941_01 | At3g51830     | putative transmembrane prot      | 0 | 0.58  | 0.65  | 0.65  | 0.75  | 0.95  | 1.06  | 0.9 | 0.41 | -2.01 | -0.18 |
| A004944_01 | At1g09415     | expressed protein; protein id:   | 0 | 0.57  | 0.81  | 0.56  | 0.91  | 1.03  | 0.51  | 0.8 | 0.66 | -1.56 | 0.32  |
| A005002_01 | At5g26707     | glutamyl-tRNA synthetase; pr     | 0 | -0.76 | -0.92 | -0.97 | -1.18 | -1.22 | -1.23 | 0.8 | 0.48 | 2.79  | -0.36 |
| A005005_01 | At5g20290     | putative protein; protein id: At | 0 | -0.71 | -1.24 | -1.28 | -1.84 | -1.91 | -1.83 | 0.8 | 0.48 | 2.77  | 0.14  |
| A005009_01 | xxxx          | b/t unknown protein; protein ic  | 0 | 1.52  | 1.25  | 1.57  | 1.43  | 1.52  | 1.30  | 0.8 | 0.55 | -1.67 | 0.94  |
| A005029_01 | At2g46505     | expressed protein; protein id:   | 0 | -0.90 | -0.99 | -1.04 | -0.97 | -0.98 | -0.95 | 0.7 | 2.21 | 2.53  | -1.31 |
| A005048_01 | At1g04970     | expressed protein; protein id:   | 0 | 0.91  | 0.99  | 0.99  | 1.33  | 1.34  | 1.43  | 1.0 | 0.16 | -2.04 | -0.03 |
| A005069_01 | At4g39660     | alanine:glyoxylate aminotrans    | 0 | 0.08  | -1.13 | -1.25 | -1.10 | -1.16 | -1.31 | 0.8 | 0.66 | 2.23  | 0.09  |
| A005075_01 | At1g23940     | gamma-adaptin, putative; pro     | 0 | -0.34 | -1.72 | -2.37 | -3.00 | -2.40 | -2.64 | 0.9 | 0.37 | 2.57  | 0.36  |
| A005086_01 | At1g22930     | unknown protein; protein id: A   | 0 | 1.59  | 2.02  | 1.96  | 1.71  | 1.14  | 2.64  | 0.9 | 0.26 | -1.55 | 0.74  |
| A005097_01 | At3g51840     | acyl-coA dehydrogenase; pro      | 0 | 1.12  | 1.04  | 1.19  | 1.41  | 1.46  | 1.67  | 1.1 | 0.10 | -1.98 | 0.01  |
| A005129_01 | At5g24800     | bZIP protein, G/HBF-1-relatec    | 0 | 0.73  | 0.74  | 0.84  | 1.14  | 1.17  | 1.05  | 0.7 | 0.96 | -2.00 | -0.06 |
| A005155_01 | At1g28660     | expressed protein; protein id:   | 0 | 3.78  | 3.25  | 1.92  | 0.88  | 0.77  | 1.09  | 1.0 | 0.26 | 0.21  | 2.11  |
| A005160_01 | At4g21960     | peroxidase, putative; protein i  | 0 | -0.24 | -0.28 | -0.34 | -0.30 | -0.82 | -1.37 | 1.0 | 0.16 | 2.11  | 0.66  |
| A005164_01 | At3g44310     | nitrilase 1; protein id: At3g443 | 0 | 0.57  | 0.91  | 1.14  | 1.17  | 1.52  | 1.92  | 0.9 | 0.31 | -1.96 | -0.64 |
| A005178_01 | At3g53750     | actin (ACT3); protein id: At3g:  | 0 | -0.92 | -0.85 | -0.77 | -0.90 | -1.03 | -0.83 | 0.8 | 0.55 | 2.49  | -1.22 |
| A005182_01 | At2g28305     | expressed protein; protein id:   | 0 | 1.45  | 1.34  | 1.37  | 1.60  | 1.41  | 1.81  | 0.7 | 1.20 | -1.89 | 0.60  |
| A005195_01 | At3g55440     | cytosolic triosephosphatisome    | 0 | -1.26 | -1.08 | -0.94 | -0.82 | -0.88 | -0.74 | 0.7 | 1.20 | 1.80  | -2.13 |
| A005204_01 | At4g32210     | putative protein; protein id: At | 0 | -1.27 | -0.99 | -0.82 | -1.12 | -1.05 | -0.84 | 1.0 | 0.16 | 2.12  | -1.60 |
| A005208_01 | At1g60590     | polygalacturonase, putative; p   | 0 | 1.00  | 0.15  | -0.89 | -2.41 | -2.02 | -1.92 | 1.2 | 0.06 | 2.07  | 1.41  |
| A005223_01 | At5g26800     | putative protein; protein id: At | 0 | -1.37 | -1.60 | -1.51 | -1.68 | -1.49 | -1.85 | 0.9 | 0.41 | 2.67  | -1.02 |
| A005227_01 | At5g25270     | putative protein; protein id: At | 0 | 0.80  | 0.84  | 0.85  | 0.95  | 1.00  | 1.35  | 0.8 | 0.66 | -1.96 | 0.08  |
| A005246_01 | At1g02660     | expressed protein; protein id:   | 0 | 2.17  | 2.21  | 1.46  | 0.89  | 0.63  | 1.14  | 1.6 | 0.06 | -0.28 | 2.11  |
| A005249_01 | At1g20880     | RRM-containing protein; prote    | 0 | 0.94  | 1.05  | 1.04  | 1.42  | 1.42  | 1.63  | 1.2 | 0.06 | -2.05 | -0.12 |
| A005338_01 | At5g19530     | spermine synthase (ACL5); p      | 0 | -0.32 | -0.35 | -0.13 | 0.32  | -0.14 | -1.16 | 0.7 | 1.61 | 1.15  | -0.22 |
| A005354_01 | At3g41979     | 5SrRNA; protein id: At3g4197     | 0 | -0.25 | -1.11 | -1.12 | -1.27 | -1.60 | -1.49 | 0.8 | 0.81 | 2.57  | 0.19  |
| A005356_01 | At4g16840     | expressed protein; protein id:   | 0 | 0.16  | 0.63  | 0.90  | 1.32  | 1.59  | 1.53  | 1.3 | 0.06 | -1.84 | -1.22 |
| A005366_01 | At5g20250     | glycosyl hydrolase family 36; j  | 0 | 2.35  | 2.71  | 2.51  | 1.83  | 1.55  | 1.80  | 0.6 | 4.47 | -1.06 | 1.69  |
| A005377_01 | At1g68945     | expressed protein; protein id:   | 0 | -0.27 | 0.33  | 1.07  | 1.84  | 1.56  | 2.28  | 1.1 | 0.10 | -1.60 | -1.56 |
| A005384_01 | At4g08685     | expressed protein; protein id:   | 0 | -1.25 | -1.70 | -1.92 | -2.58 | NA    | NA    | 1.6 | 0.06 | NA    | NA    |
| A005390_01 | At5g37020     | auxin response transcription f   | 0 | -0.97 | -1.40 | -1.32 | -1.74 | -1.56 | -1.48 | 0.9 | 0.26 | 2.68  | -0.63 |
| A005394_01 | At5g62700     | tubulin beta-2/beta-3 chain (s   | 0 | -0.60 | -0.99 | -1.03 | -1.15 | -1.66 | -2.01 | 1.2 | 0.06 | 2.69  | 0.29  |
| A005407_01 | At1g02475     | unknown protein; protein id: A   | 0 | 0.61  | 0.88  | 0.98  | 0.93  | 0.80  | 1.01  | 0.7 | 1.61 | -1.92 | 0.41  |
| A005410_01 | At5g26696     | nectarin - like protein; protein | 0 | 0.16  | 0.54  | 0.98  | 0.90  | 1.28  | 1.51  | 0.9 | 0.26 | -1.83 | -1.14 |
| A005417_01 | not annotated | Chr1 C/20403687-20403756         | 0 | 0.72  | 0.72  | 0.83  | 1.05  | 1.20  | 1.10  | 0.8 | 0.81 | -1.99 | -0.22 |
| A005426_01 | At5g38980     | putative protein; protein id: At | 0 | 0.65  | 1.12  | 1.06  | 1.06  | 1.15  | 0.63  | 0.6 | 4.47 | -1.45 | 0.65  |

|            |           |                                                     |   |       |       |       |       |       |       |     |      |       |       |
|------------|-----------|-----------------------------------------------------|---|-------|-------|-------|-------|-------|-------|-----|------|-------|-------|
| A005557_01 | At3g51890 | putative protein; protein id: At                    | 0 | 1.55  | 1.77  | 1.83  | 1.91  | 2.05  | 2.13  | 2.2 | 0.06 | -1.99 | 0.40  |
| A005562_01 | At1g23870 | trehalose 6-phosphate synthase                      | 0 | 1.54  | 1.43  | 1.47  | 1.76  | 1.78  | 2.02  | 1.5 | 0.06 | -1.94 | 0.30  |
| A005576_01 | At1g75710 | unknown protein; protein id: A                      | 0 | -0.82 | -1.95 | -1.88 | -2.89 | -3.21 | -3.16 | 2.3 | 0.06 | 2.73  | 0.34  |
| A005590_01 | At4g16155 | expressed protein; protein id:                      | 0 | -0.80 | -1.11 | -1.34 | -1.41 | -1.73 | -2.23 | 1.2 | 0.06 | 2.74  | 0.09  |
| A005592_01 | At5g25610 | dehydration-induced protein F                       | 0 | -0.08 | 0.72  | 0.86  | 0.84  | 0.71  | 0.74  | 0.7 | 2.21 | -1.24 | -0.37 |
| A005615_01 | At1g32540 | zinc-finger protein, putative; p                    | 0 | -0.32 | -0.42 | -0.64 | -0.89 | -1.44 | -1.36 | 1.3 | 0.06 | 2.54  | 0.75  |
| A005620_01 | At5g28020 | cysteine synthase; protein id:                      | 0 | 1.04  | 1.22  | 1.32  | 1.75  | 1.45  | 1.68  | 0.9 | 0.31 | -2.01 | 0.07  |
| A005629_01 | At5g21170 | AKIN beta1; protein id: At5g2                       | 0 | 1.33  | 1.10  | 1.06  | 1.08  | 1.09  | 0.80  | 0.7 | 1.20 | -1.26 | 1.43  |
| A005648_01 | At2g04160 | subtilisin-like serine protease                     | 0 | 0.82  | 1.75  | 1.92  | 2.65  | 2.63  | 1.85  | 1.0 | 0.16 | -1.82 | -0.40 |
| A005661_01 | At1g24020 | Bet v I allergen family; protein                    | 0 | -2.80 | -3.95 | -2.81 | -4.48 | -4.37 | -3.77 | 1.5 | 0.06 | 2.66  | -0.78 |
| A005680_01 | At1g20430 | expressed protein; protein id:                      | 0 | -1.17 | -1.37 | -1.31 | -1.40 | -1.48 | -1.87 | 1.3 | 0.06 | 2.74  | -0.74 |
| A005687_01 | At5g58570 | expressed protein; protein id:                      | 0 | 0.72  | 1.31  | 1.76  | 2.44  | 3.04  | 2.75  | 1.7 | 0.06 | -1.92 | -0.99 |
| A005695_01 | At1g65800 | receptor kinase, putative; pro                      | 0 | 1.12  | 2.41  | 2.56  | 3.07  | 3.13  | 2.78  | 0.7 | 1.61 | -1.95 | -0.30 |
| A005702_01 | At3g10690 | putative DNA gyrase subunit                         | 0 | -0.42 | -1.10 | -1.05 | -1.18 | -0.98 | NA    | 1.1 | 0.14 | NA    | NA    |
| A005713_01 | At5g19520 | putative protein; protein id: At                    | 0 | -0.29 | -0.85 | -0.82 | -0.91 | -0.75 | -0.96 | 1.3 | 0.06 | 2.53  | -0.34 |
| A005714_01 | At5g25460 | unknown protein                                     | 0 | -0.46 | -1.68 | -2.07 | -3.43 | -3.33 | -3.15 | 1.8 | 0.06 | 2.61  | 0.57  |
| A005715_01 | At1g27435 | expressed protein; protein id:                      | 0 | -1.10 | -1.13 | -1.04 | -1.11 | -1.02 | -1.33 | 0.8 | 0.55 | 2.57  | -1.23 |
| A005722_01 | At1g60770 | hypothetical protein; protein id                    | 0 | -0.83 | -1.19 | -1.10 | -1.33 | -1.44 | -1.40 | 0.8 | 0.55 | 2.79  | -0.47 |
| A005723_01 | At1g60660 | cytochrome b5, putative; prot                       | 0 | -1.03 | -1.26 | -1.29 | -1.58 | -1.66 | -1.78 | 0.9 | 0.31 | 2.82  | -0.36 |
| A005726_01 | At3g62030 | peptidylprolyl isomerase ROC                        | 0 | -1.08 | -1.30 | -1.39 | -1.41 | -1.61 | -2.10 | 0.9 | 0.41 | 2.76  | -0.38 |
| A005727_01 | At3g47340 | glutamine-dependent asparag                         | 0 | 3.28  | 2.61  | 1.29  | -1.05 | -0.95 | -1.26 | 0.7 | 0.96 | 1.24  | 2.06  |
| A005729_01 | At2g25625 | auxin-regulated protein; prote                      | 0 | 2.94  | 3.03  | 3.07  | 3.37  | 3.55  | 4.84  | 1.1 | 0.10 | -1.95 | 0.13  |
| A005730_01 | At2g22670 | auxin-regulated protein (IAA8                       | 0 | -1.36 | -1.69 | -1.42 | -1.39 | -1.42 | -1.74 | 0.7 | 1.61 | 2.54  | -1.29 |
| A005733_01 | At2g46830 | myb-related transcription fact                      | 0 | 0.87  | 1.26  | 1.51  | 1.65  | 1.62  | 2.60  | 0.8 | 0.81 | -1.94 | -0.46 |
| A005736_01 | At1g11910 | putative aspartic proteinase; p                     | 0 | 0.34  | 0.50  | 0.61  | 0.61  | 0.56  | 1.02  | 0.6 | 2.21 | -1.88 | -0.40 |
| A005740_01 | At1g12730 | expressed protein; protein id:                      | 0 | 0.89  | 0.89  | 1.13  | 1.34  | 1.51  | 1.46  | 0.9 | 0.37 | -2.04 | -0.21 |
| A005742_01 | At3g08580 | adenylate translocator; protei                      | 0 | -0.66 | -0.78 | -0.79 | -0.87 | -1.26 | -0.94 | 0.8 | 0.81 | 2.68  | -0.37 |
| A005746_01 | At3g49010 | 60S ribosomal protein L13, Bl                       | 0 | -1.01 | -1.32 | -1.23 | -1.71 | -1.91 | -1.91 | 0.9 | 0.31 | 2.81  | -0.15 |
| A005751_01 | At4g37520 | peroxidase, putative; protein i                     | 0 | 2.92  | 3.64  | 3.71  | 3.68  | 3.67  | 3.57  | 2.4 | 0.06 | -1.85 | 0.68  |
| A005754_01 | At4g11290 | peroxidase, putative; protein i                     | 0 | -1.37 | -1.41 | -1.30 | -0.55 | -0.77 | -1.06 | 0.7 | 1.61 | 1.55  | -2.20 |
| A005771_01 | At5g27850 | putative 60S ribosomal protei                       | 0 | -0.84 | -1.23 | -1.27 | -1.78 | -1.91 | -1.85 | 1.2 | 0.06 | 2.80  | 0.03  |
| A005787_01 | At5g25900 | cytochrome P450 GA3; protei                         | 0 | 0.27  | 0.14  | 0.49  | 0.85  | 1.11  | 1.08  | 1.0 | 0.16 | -1.60 | -1.35 |
| A005792_01 | xxxx      | b/t ferrochelatase-l; protein id                    | 0 | 0.34  | 0.46  | 0.57  | 0.73  | 1.05  | 0.76  | 0.6 | 4.47 | -1.83 | -0.77 |
| A005834_01 | At5g19860 | unknown protein; protein id: A                      | 0 | 0.71  | 0.78  | 0.73  | 1.03  | 1.04  | 0.78  | 0.8 | 0.66 | -1.86 | 0.25  |
| A005839_01 | At5g27150 | NHE1 Na <sup>+</sup> /H <sup>+</sup> exchanger; pro | 0 | 0.54  | 0.82  | 0.91  | 1.08  | 1.06  | 1.65  | 1.0 | 0.16 | -1.96 | -0.52 |
| A005864_01 | At1g75500 | nodulin-like protein; protein id                    | 0 | -0.92 | -0.72 | -0.74 | -0.83 | -0.90 | -1.31 | 1.2 | 0.06 | 2.47  | -0.61 |
| A005906_01 | At5g20150 | ids4-like protein; protein id: A                    | 0 | -0.93 | -1.10 | -0.83 | -1.91 | -1.60 | 0.25  | 0.7 | 1.61 | 1.28  | -0.88 |
| A005916_01 | xxxx      | b/t putative protein; protein id:                   | 0 | 0.17  | -0.05 | -0.38 | -0.50 | -0.94 | -1.45 | 0.8 | 0.66 | 2.17  | 1.23  |
| A005933_01 | At1g50640 | ethylene responsive element                         | 0 | 0.76  | 0.76  | 0.91  | 0.99  | 1.15  | 1.06  | 0.7 | 0.96 | -2.01 | 0.06  |
| A005946_01 | At1g76090 | S-adenosyl-methionine-sterol                        | 0 | 0.37  | 0.00  | -0.53 | -1.04 | -1.21 | -1.05 | 1.1 | 0.14 | 2.18  | 1.41  |
| A005959_01 | At5g03240 | polyubiquitin (UBQ3); protein                       | 0 | 0.97  | 0.92  | 1.24  | 1.43  | 1.44  | 1.55  | 0.8 | 0.55 | -2.04 | -0.15 |
| A005969_01 | At1g61520 | light-harvesting chlorophyll a/l                    | 0 | 0.83  | 1.14  | 1.10  | 1.43  | 1.43  | 0.95  | 1.2 | 0.06 | -1.77 | 0.29  |
| A005981_01 | At1g20620 | catalase 3; protein id: At1g20                      | 0 | 1.44  | 1.65  | 1.76  | 1.66  | 1.80  | 1.88  | 1.1 | 0.06 | -1.93 | 0.57  |
| A005989_01 | At1g29930 | light-harvesting chlorophyll a/l                    | 0 | 0.05  | -0.07 | -0.22 | -0.27 | -0.40 | -1.04 | 0.6 | 4.47 | 2.06  | 0.97  |

|            |               |                                   |   |       |       |       |       |       |       |     |      |       |       |
|------------|---------------|-----------------------------------|---|-------|-------|-------|-------|-------|-------|-----|------|-------|-------|
| A006015_01 | xxxx          | b/t RING finger - like protein;   | 0 | 0.57  | 0.42  | 0.69  | 1.15  | 1.08  | 0.90  | 0.9 | 0.37 | -1.80 | -0.62 |
| A006021_01 | not annotated | EST ethylene-responsive ele       | 0 | 2.12  | 2.29  | 2.39  | 1.62  | 1.58  | 1.86  | 0.6 | 4.47 | -1.32 | 1.52  |
| A006022_01 | At4g20260     | endomembrane-associated p         | 0 | 2.17  | 2.42  | 2.40  | 2.56  | 2.59  | 3.54  | 1.3 | 0.06 | -1.97 | 0.27  |
| A006030_01 | At2g40880     | putative cysteine proteinase ii   | 0 | 1.29  | 2.07  | 2.43  | 2.84  | 2.76  | 2.58  | 2.2 | 0.06 | -2.00 | -0.19 |
| A006039_01 | At2g03710     | MADS-box protein (AGL3); pr       | 0 | 0.35  | 0.44  | 1.53  | 1.47  | 1.64  | 1.47  | 0.7 | 2.21 | -1.73 | -0.97 |
| A006041_01 | At2g43360     | biotin synthase (Bio B); protei   | 0 | -1.40 | -1.76 | -1.64 | -1.63 | -2.07 | -2.31 | 1.5 | 0.06 | 2.74  | -0.64 |
| A006043_01 | At2g31570     | glutathione peroxidase, putati    | 0 | 0.30  | 0.71  | 0.67  | 0.71  | 0.74  | 1.28  | 0.6 | 4.47 | -1.85 | -0.46 |
| A006046_01 | At2g43510     | putative trypsin inhibitor; prote | 0 | 1.85  | 2.55  | 2.65  | 2.76  | 2.76  | 2.78  | 1.4 | 0.06 | -1.95 | 0.36  |
| A006048_01 | At2g28800     | chloroplast membrane proteir      | 0 | 0.80  | 0.86  | 0.94  | 1.11  | 0.93  | 0.79  | 0.7 | 1.61 | -1.76 | 0.66  |
| A006049_01 | At2g10940     | expressed protein; protein id:    | 0 | -0.11 | -1.04 | -1.88 | -3.36 | -3.28 | -2.52 | 1.4 | 0.06 | 2.42  | 0.78  |
| A006050_01 | At2g39000     | unknown protein; protein id: A    | 0 | 1.07  | 1.15  | 1.21  | 1.58  | 1.56  | 1.49  | 1.3 | 0.06 | -2.01 | 0.09  |
| A006056_01 | At2g37970     | expressed protein; protein id:    | 0 | 1.25  | 1.64  | 1.60  | 1.42  | 1.37  | 2.18  | 0.9 | 0.31 | -1.84 | 0.48  |
| A006063_01 | At2g38530     | putative nonspecific lipid-tran:  | 0 | 0.39  | -0.32 | -0.69 | -1.96 | -2.74 | -1.70 | 1.1 | 0.10 | 2.23  | 1.13  |
| A006070_01 | At2g26330     | putative receptor-like protein l  | 0 | -0.80 | -1.38 | -1.99 | -2.46 | -2.09 | -2.26 | 0.8 | 0.55 | 2.70  | 0.13  |
| A006089_01 | At2g20920     | unknown protein; protein id: A    | 0 | 0.87  | 1.19  | 1.33  | 1.78  | 2.07  | 2.05  | 2.4 | 0.06 | -2.03 | -0.59 |
| A006090_01 | At2g02850     | putative basic blue protein (pl   | 0 | -1.89 | -3.97 | -3.41 | -5.99 | -5.01 | -5.31 | 1.0 | 0.16 | 2.70  | -0.01 |
| A006099_01 | At2g35680     | expressed protein; protein id:    | 0 | 1.63  | 1.45  | 1.27  | 1.04  | 0.71  | 0.95  | 0.6 | 4.47 | -0.74 | 1.95  |
| A006100_01 | At2g33370     | 60S ribosomal protein L23; pr     | 0 | -0.92 | -1.65 | -1.29 | -2.14 | -2.29 | -2.36 | 1.1 | 0.10 | 2.80  | 0.03  |
| A006102_01 | At2g46450     | cyclic nucleotide-regulated ior   | 0 | -0.21 | 0.45  | 0.71  | 1.22  | 1.21  | 1.26  | 0.8 | 0.81 | -1.66 | -1.40 |
| A006104_01 | At2g05520     | putative glycine-rich protein; p  | 0 | 1.96  | 2.56  | 2.08  | 1.67  | 1.92  | 0.27  | 0.8 | 0.48 | -0.46 | 1.55  |
| A006124_01 | At2g05620     | expressed protein; protein id:    | 0 | 0.74  | 1.07  | 0.97  | 1.08  | 1.14  | 1.19  | 1.3 | 0.06 | -1.99 | 0.31  |
| A006175_01 | At2g35690     | putative acyl-CoA oxidase; pr     | 0 | 0.63  | 0.72  | 0.69  | 0.93  | 1.16  | 1.07  | 0.8 | 0.55 | -2.02 | -0.24 |
| A006181_01 | At2g14900     | similar to gibberellin-regulatec  | 0 | 0.36  | -0.15 | -0.53 | -1.39 | -1.90 | -1.70 | 1.5 | 0.06 | 2.26  | 1.33  |
| A006185_01 | At2g20040     | putative cAMP-dependent prc       | 0 | 0.21  | 0.47  | 0.69  | 0.90  | 0.67  | 1.13  | 0.9 | 0.27 | -1.85 | -0.80 |
| A006197_01 | At2g01610     | unknown protein; protein id: A    | 0 | -1.61 | -1.41 | -0.75 | -0.14 | 0.06  | 0.57  | 1.0 | 0.20 | -0.20 | -2.53 |
| A006202_01 | At2g28080     | putative glucosyltransferase;     | 0 | -0.84 | -1.14 | -1.13 | -1.48 | -1.87 | -1.70 | 1.3 | 0.06 | 2.79  | -0.05 |
| A006211_01 | At2g46370     | putative auxin-responsive pro     | 0 | 0.19  | 0.47  | 0.61  | 0.77  | 0.72  | 1.04  | 0.7 | 1.61 | -1.92 | -0.86 |
| A006226_01 | At2g30200     | putative malonyl-CoA:Acyl ca      | 0 | -1.00 | -1.15 | -1.27 | -1.50 | -1.47 | -1.94 | 1.1 | 0.14 | 2.79  | -0.30 |
| A006227_01 | At2g30230     | hypothetical protein; protein ic  | 0 | 1.74  | 1.52  | 0.87  | 0.65  | 0.72  | 1.26  | 0.8 | 0.66 | -0.63 | 1.79  |
| A006233_01 | At2g19940     | putative N-acetyl-gamma-glut      | 0 | -0.74 | -1.09 | -1.20 | -1.46 | -1.35 | -1.71 | 0.9 | 0.37 | 2.80  | -0.14 |
| A006235_01 | At2g42790     | putative citrate synthase; prot   | 0 | 1.69  | 1.70  | 1.84  | 1.99  | 2.24  | 2.49  | 1.0 | 0.18 | -2.01 | 0.17  |
| A006239_01 | At2g01720     | putative ribophorin I; protein ic | 0 | -0.38 | -0.47 | -0.57 | -0.98 | -0.65 | -1.43 | 1.1 | 0.10 | 2.42  | 0.40  |
| A006243_01 | At2g43090     | 3-isopropylmalate dehydratas      | 0 | -0.87 | -0.79 | -0.83 | -1.08 | -1.06 | -1.09 | 0.7 | 2.21 | 2.67  | -0.61 |
| A006246_01 | At2g35050     | putative protein kinase; protei   | 0 | 0.78  | 1.12  | 1.03  | 0.78  | 0.00  | 1.05  | 0.7 | 1.20 | -0.68 | 1.26  |
| A006251_01 | At2g30695     | expressed protein; protein id:    | 0 | -0.82 | -1.01 | -1.01 | -0.83 | -1.03 | -1.44 | 1.3 | 0.06 | 2.57  | -0.79 |
| A006253_01 | At2g24180     | cytochrome p450 family; prot      | 0 | 1.02  | 1.23  | 1.29  | 1.22  | 1.17  | 1.50  | 0.8 | 0.96 | -1.92 | 0.56  |
| A006264_01 | At2g37460     | nodulin-like protein; protein id  | 0 | 0.94  | 1.42  | 1.76  | 2.58  | 2.52  | 3.10  | 1.4 | 0.06 | -1.98 | -0.80 |
| A006269_01 | At2g20180     | unknown protein; protein id: A    | 0 | 0.77  | 1.00  | 1.20  | 1.46  | 1.49  | 1.06  | 0.8 | 0.48 | -1.89 | -0.06 |
| A006273_01 | At2g01190     | expressed protein; protein id:    | 0 | 0.64  | 1.10  | 1.29  | 1.39  | 1.25  | 1.47  | 1.0 | 0.26 | -2.01 | -0.14 |
| A006277_01 | At2g35800     | putative mitochondrial carrier    | 0 | 1.06  | 0.90  | 0.72  | 0.62  | 0.69  | 0.72  | 0.8 | 0.48 | -1.08 | 1.70  |
| A006278_01 | At2g30020     | protein phosphatase 2C (PP2       | 0 | 0.84  | 1.21  | 1.02  | 0.75  | 0.58  | 0.90  | 1.2 | 0.06 | -1.15 | 1.45  |
| A006284_01 | At2g45290     | putative transketolase precur:    | 0 | -1.65 | -1.85 | -1.45 | -0.31 | -0.74 | -1.71 | 0.6 | 2.21 | 1.38  | -1.90 |
| A006288_01 | At2g03420     | hypothetical protein; protein ic  | 0 | -0.42 | -0.53 | -0.63 | -0.54 | -0.73 | -1.29 | 0.7 | 2.21 | 2.50  | 0.05  |
| A006291_01 | At2g33990     | putative SF16 protein {Helian     | 0 | 1.05  | 1.54  | 1.37  | 1.53  | 0.97  | 0.38  | 1.1 | 0.10 | -0.77 | 1.27  |

|            |           |                                  |   |       |       |       |       |       |       |     |      |       |       |
|------------|-----------|----------------------------------|---|-------|-------|-------|-------|-------|-------|-----|------|-------|-------|
| A006313_01 | At2g19000 | expressed protein; protein id:   | 0 | 0.22  | 0.71  | 1.00  | 1.02  | 1.19  | 1.36  | 0.7 | 2.21 | -1.93 | -0.87 |
| A006329_01 | At2g40850 | hypothetical protein; protein ic | 0 | 0.22  | 0.66  | 1.02  | 1.01  | 1.37  | 1.77  | 0.9 | 0.31 | -1.84 | -1.04 |
| A006387_01 | At2g38640 | unknown protein; protein id: A   | 0 | 0.74  | 1.74  | 2.05  | 2.21  | 2.10  | 2.42  | 1.5 | 0.06 | -1.98 | -0.40 |
| A006389_01 | At2g32800 | putative protein kinase; protei  | 0 | 0.95  | 1.25  | 1.40  | 2.03  | 1.90  | 1.66  | 0.8 | 0.81 | -1.98 | -0.28 |
| A006400_01 | At2g32650 | expressed protein; protein id:   | 0 | -0.47 | -0.65 | -0.61 | -0.49 | -0.68 | -1.37 | 0.8 | 0.66 | 2.39  | -0.16 |
| A006419_01 | At2g38730 | putative peptidyl-prolyl cis-tra | 0 | -0.80 | -0.84 | -0.91 | -1.04 | -1.49 | -1.18 | 0.7 | 2.21 | 2.70  | -0.25 |
| A006421_01 | At2g38230 | similar to SOR1 from the fung    | 0 | 1.65  | 1.76  | 1.57  | 1.30  | 1.25  | 1.12  | 0.9 | 0.27 | -1.13 | 1.66  |
| A006429_01 | At2g01400 | expressed protein; protein id:   | 0 | -0.12 | 0.08  | 0.05  | 0.83  | 1.12  | 0.65  | 0.8 | 0.55 | -1.32 | -1.66 |
| A006567_01 | At2g46600 | putative caltractin; protein id: | 0 | 0.63  | 0.98  | 1.16  | 1.54  | 1.96  | 2.25  | 0.9 | 0.31 | -1.94 | -0.89 |
| A006568_01 | At2g27180 | expressed protein; protein id:   | 0 | 0.27  | 0.62  | 0.93  | 0.93  | 0.99  | 1.41  | 1.1 | 0.10 | -1.91 | -0.82 |
| A006579_01 | At2g22080 | En/Spm-like transposon prote     | 0 | -0.23 | -0.51 | -0.42 | -0.74 | -1.01 | -1.01 | 1.0 | 0.16 | 2.68  | 0.53  |
| A006595_01 | At2g13350 | hypothetical protein; protein ic | 0 | 0.06  | 0.33  | 0.64  | 0.92  | 0.74  | 1.32  | 1.1 | 0.10 | -1.72 | -1.20 |
| A006596_01 | At2g29350 | putative tropinone reductase;    | 0 | 1.46  | 1.84  | 1.73  | 2.23  | 2.65  | 3.64  | 0.9 | 0.41 | -1.97 | -0.41 |
| A006603_01 | At2g32440 | ent-kaurenoic acid oxidase (c    | 0 | 1.66  | 1.46  | 1.11  | 0.91  | 0.87  | 0.98  | 1.0 | 0.16 | -0.78 | 1.94  |
| A006622_01 | At2g36710 | pectinesterase family; protein   | 0 | 0.48  | 1.79  | 2.83  | 3.47  | 3.43  | 3.36  | 2.4 | 0.06 | -1.87 | -0.96 |
| A006637_01 | At2g31360 | delta 9 desaturase; protein id   | 0 | -0.96 | -0.97 | -1.03 | -1.36 | -1.43 | -0.85 | 0.6 | 2.21 | 2.44  | -0.78 |
| A006681_01 | At2g28810 | Dof zinc finger protein; proteir | 0 | 0.61  | 0.89  | 0.91  | 1.20  | 1.11  | 1.30  | 0.8 | 0.81 | -2.05 | -0.25 |
| A006710_01 | At2g38800 | calmodulin-binding protein; pr   | 0 | 1.00  | 1.07  | 1.20  | 1.25  | 1.48  | 1.61  | 0.8 | 0.81 | -2.03 | 0.01  |
| A006716_01 | At2g17230 | expressed protein; protein id:   | 0 | -0.83 | -0.85 | -1.39 | -2.27 | -2.64 | -2.34 | 1.2 | 0.06 | 2.62  | 0.60  |
| A006726_01 | At2g20340 | putative tyrosine decarboxyla:   | 0 | -0.76 | -1.34 | -1.25 | -1.67 | -1.11 | -1.62 | 0.9 | 0.41 | 2.64  | -0.49 |
| A006733_01 | At2g22010 | unknown protein; protein id: A   | 0 | 0.36  | 0.57  | 0.76  | 0.89  | 0.82  | 1.30  | 0.7 | 2.21 | -1.91 | -0.72 |
| A006736_01 | At2g46690 | putative auxin-regulated prote   | 0 | 0.71  | 1.86  | 3.11  | 3.18  | 3.22  | 3.22  | 0.8 | 0.66 | -1.89 | -0.74 |
| A006738_01 | At2g46710 | putative rac GTPase activatin    | 0 | 0.73  | 0.76  | 0.86  | 1.12  | 0.86  | 0.65  | 0.8 | 0.66 | -1.60 | 0.61  |
| A006754_01 | At2g27290 | expressed protein; protein id:   | 0 | 0.40  | 0.84  | 0.85  | 1.35  | 1.33  | 1.03  | 0.9 | 0.27 | -1.89 | -0.56 |
| A006755_01 | At2g02220 | leucine-rich repeat transmem     | 0 | 0.92  | 1.11  | 0.60  | 0.47  | 0.23  | 0.52  | 1.0 | 0.20 | -0.28 | 2.05  |
| A006761_01 | At2g31880 | leucine-rich repeat transmem     | 0 | 1.58  | 2.10  | 2.07  | 2.31  | 2.46  | 2.59  | 1.0 | 0.16 | -2.03 | 0.18  |
| A006771_01 | At2g35900 | hypothetical protein; protein ic | 0 | 1.53  | 1.53  | 1.62  | 1.73  | 1.82  | 2.13  | 1.2 | 0.06 | -1.98 | 0.33  |
| A006802_01 | At2g37090 | unknown protein; protein id: A   | 0 | -0.29 | 0.55  | 1.11  | 2.98  | 1.91  | 0.88  | 0.6 | 4.47 | -1.17 | -1.07 |
| A006811_01 | At2g13360 | alanine-glyoxylate aminotrans    | 0 | 1.50  | 1.63  | 1.60  | 1.60  | 1.81  | 1.82  | 1.4 | 0.06 | -1.91 | 0.63  |
| A006817_01 | At2g14910 | unknown protein; protein id: A   | 0 | 1.02  | 1.04  | 1.14  | 1.22  | 1.32  | 1.31  | 1.1 | 0.14 | -1.98 | 0.38  |
| A006824_01 | At2g33810 | putative squamosa-promoter       | 0 | 0.41  | -0.85 | -1.01 | -2.23 | -2.88 | -2.19 | 1.6 | 0.06 | 2.37  | 1.05  |
| A006826_01 | At2g19570 | putative cytidine deaminase; j   | 0 | 1.74  | 1.52  | 1.35  | 1.35  | 1.56  | 2.53  | 0.8 | 0.48 | -1.67 | 0.44  |
| A006847_01 | At2g29980 | omega-3 fatty acid desaturas     | 0 | -1.23 | -1.82 | -1.87 | -2.66 | -2.95 | -2.50 | 1.2 | 0.06 | 2.76  | 0.00  |
| A006885_01 | At2g02710 | putative receptor-like protein l | 0 | 2.42  | 2.34  | 2.48  | 2.42  | 2.60  | 2.73  | 1.0 | 0.16 | -1.87 | 0.72  |
| A006893_01 | At2g38170 | high affinity Ca2+ antiporter; p | 0 | 0.87  | 0.98  | 1.13  | 0.99  | 1.32  | 1.75  | 1.2 | 0.06 | -1.94 | -0.06 |
| A006919_01 | At2g46950 | cytochrome p450, putative; pi    | 0 | 2.87  | 3.10  | 2.81  | 2.50  | 2.74  | 3.43  | 1.4 | 0.06 | -1.74 | 0.91  |
| A006928_01 | At2g34350 | nodulin-like protein; protein id | 0 | -0.61 | -0.85 | -0.70 | -1.16 | -1.69 | -1.09 | 1.1 | 0.10 | 2.44  | 0.20  |
| A006935_01 | At2g26170 | thromboxane-A synthase(cytc      | 0 | 1.27  | 1.28  | 0.68  | -0.29 | -0.44 | 0.10  | 0.9 | 0.37 | 0.87  | 2.05  |
| A006944_01 | At2g44490 | glycosyl hydrolase family 1; pi  | 0 | 1.38  | 2.28  | 2.52  | 2.81  | 2.78  | 2.89  | 1.4 | 0.06 | -2.03 | -0.13 |
| A006949_01 | At2g45710 | putative ribosomal protein S2    | 0 | -0.59 | -0.67 | -0.62 | -0.83 | -1.10 | -0.99 | 0.8 | 0.81 | 2.74  | -0.15 |
| A006954_01 | At2g39340 | unknown protein; protein id: A   | 0 | 0.65  | 1.00  | 1.02  | 1.18  | 1.27  | 1.28  | 1.2 | 0.06 | -2.05 | -0.10 |
| A006959_01 | At2g22870 | putative nucleotide-binding pr   | 0 | -0.86 | -0.69 | -0.70 | -0.78 | -1.31 | -1.32 | 0.6 | 4.47 | 2.44  | -0.14 |
| A006972_01 | At2g32230 | hypothetical protein; protein ic | 0 | -1.08 | -1.19 | -1.26 | -1.12 | -0.72 | -1.36 | 0.8 | 0.81 | 2.30  | -1.44 |
| A006975_01 | At2g46680 | homeodomain transcription fa     | 0 | 2.01  | 2.04  | 2.59  | 2.42  | 2.57  | 3.15  | 1.0 | 0.18 | -2.01 | 0.17  |

|            |           |                                  |   |       |       |       |       |       |       |     |      |       |       |
|------------|-----------|----------------------------------|---|-------|-------|-------|-------|-------|-------|-----|------|-------|-------|
| A006988_01 | At2g47940 | DegP2 protease; protein id: A    | 0 | -0.43 | -0.65 | -0.78 | -0.77 | -0.93 | -1.13 | 0.7 | 1.61 | 2.76  | -0.03 |
| A007000_01 | At2g02370 | expressed protein; protein id:   | 0 | 0.53  | 0.63  | 0.91  | 1.09  | 1.26  | 1.34  | 0.9 | 0.37 | -2.01 | -0.69 |
| A007023_01 | At2g14880 | expressed protein; protein id:   | 0 | -0.61 | -0.67 | -0.68 | -0.87 | -0.92 | -1.19 | 0.7 | 2.21 | 2.74  | -0.15 |
| A007051_01 | At2g27040 | Argonaute (AGO1)-like protei     | 0 | -1.49 | -2.22 | -2.11 | -2.23 | -2.32 | -2.69 | 0.8 | 0.81 | 2.77  | -0.60 |
| A007052_01 | At2g27090 | hypothetical protein; protein ic | 0 | 0.40  | 0.77  | 0.93  | 1.20  | 0.87  | 1.23  | 0.9 | 0.27 | -1.95 | -0.47 |
| A007054_01 | At2g37050 | putative receptor-like protein l | 0 | 0.19  | 0.01  | -0.36 | -0.78 | -1.05 | -0.87 | 1.0 | 0.16 | 2.16  | 1.40  |
| A007061_01 | At2g37120 | expressed protein; protein id:   | 0 | -0.85 | -1.28 | -1.33 | -1.44 | -1.90 | -2.20 | 1.4 | 0.06 | 2.76  | 0.00  |
| A007064_01 | At2g38870 | putative protease inhibitor; pr  | 0 | 1.29  | 0.89  | 0.37  | 0.38  | 0.25  | -0.19 | 0.8 | 0.55 | 0.62  | 2.10  |
| A007073_01 | At2g16660 | nodulin-like protein; protein id | 0 | 1.38  | 1.39  | 0.66  | 0.60  | 0.47  | 0.88  | 1.0 | 0.16 | -0.45 | 1.92  |
| A007075_01 | At2g21180 | expressed protein; protein id:   | 0 | 1.43  | 1.48  | 1.74  | 2.11  | 2.00  | 1.62  | 1.3 | 0.06 | -1.89 | 0.30  |
| A007090_01 | At2g02180 | expressed protein; protein id:   | 0 | 0.71  | 0.83  | 0.82  | 0.96  | 1.00  | 1.11  | 1.1 | 0.14 | -2.04 | 0.18  |
| A007148_01 | At2g42750 | expressed protein; protein id:   | 0 | 1.72  | 1.73  | 1.72  | 2.06  | 2.07  | 2.35  | 1.6 | 0.06 | -1.99 | 0.33  |
| A007211_01 | At2g33770 | hypothetical protein; protein ic | 0 | 0.08  | 0.58  | 0.72  | 0.65  | 0.24  | 1.12  | 0.8 | 0.81 | -1.41 | -0.47 |
| A007218_01 | At5g15220 | ribosomal protein L27 - like; p  | 0 | -1.34 | -1.74 | -1.77 | -2.04 | -1.96 | -2.19 | 0.8 | 0.48 | 2.79  | -0.58 |
| A007219_01 | At2g04030 | putative heat shock protein; p   | 0 | -1.21 | -1.03 | -0.86 | -1.18 | -1.12 | -1.08 | 0.7 | 1.20 | 2.36  | -1.23 |
| A007243_01 | At2g39360 | putative protein kinase; protei  | 0 | 0.83  | 1.38  | 1.38  | 1.69  | 1.86  | 1.90  | 0.9 | 0.37 | -2.05 | -0.28 |
| A007246_01 | At2g34870 | expressed protein; protein id:   | 0 | -1.54 | -1.91 | -1.10 | -1.89 | -1.94 | -1.44 | 0.9 | 0.41 | 2.43  | -1.27 |
| A007251_01 | At2g23610 | putative acetone-cyanohydrin     | 0 | -0.62 | -0.02 | 0.15  | 0.81  | 1.02  | 0.90  | 0.8 | 0.66 | -1.29 | -1.96 |
| A007260_01 | At2g23600 | putative acetone-cyanohydrin     | 0 | -0.05 | 0.71  | 0.91  | 1.54  | 1.62  | 1.30  | 1.2 | 0.06 | -1.72 | -1.19 |
| A007283_01 | At2g24820 | putative Rieske iron-sulfur pro  | 0 | 0.66  | 1.14  | 1.22  | 1.06  | 0.96  | 1.36  | 0.7 | 1.61 | -1.87 | 0.30  |
| A007284_01 | At2g19310 | putative small heat shock pro    | 0 | 0.50  | 1.02  | 1.34  | 1.12  | 1.46  | 1.42  | 1.2 | 0.06 | -1.89 | -0.32 |
| A007290_01 | At2g01250 | putative ribosomal protein L7;   | 0 | -0.70 | -0.98 | -0.91 | -1.55 | -1.80 | -1.77 | 0.8 | 0.55 | 2.73  | 0.30  |
| A007291_01 | At2g22470 | arabinogalactan-protein (AGF     | 0 | 1.07  | 1.27  | 0.66  | 0.05  | -0.17 | 0.10  | 0.8 | 0.96 | 0.69  | 2.11  |
| A007294_01 | At2g28720 | putative histone H2B; protein    | 0 | 0.90  | 1.41  | 1.97  | 2.51  | 2.26  | 2.22  | 1.3 | 0.06 | -1.98 | -0.53 |
| A007300_01 | At2g44060 | similar to late embryogenesis    | 0 | -0.48 | -0.81 | -0.91 | -1.03 | -1.44 | -1.54 | 0.8 | 0.55 | 2.73  | 0.27  |
| A007302_01 | At2g31750 | putative glucosyltransferase;    | 0 | -0.07 | 0.49  | 1.01  | 1.33  | 1.68  | 2.05  | 0.8 | 0.55 | -1.71 | -1.45 |
| A007305_01 | At2g28950 | expansin, putative; protein id:  | 0 | -2.56 | -2.98 | -2.87 | -3.82 | -4.42 | -4.40 | 1.2 | 0.06 | 2.81  | -0.25 |
| A007315_01 | At2g18440 | unknown protein; protein id: A   | 0 | 0.89  | 0.96  | 1.21  | 1.12  | 0.81  | 1.05  | 0.7 | 2.21 | -1.65 | 0.83  |
| A007325_01 | At2g45820 | remorin; protein id: At2g4582    | 0 | 1.64  | 1.44  | 1.27  | 1.00  | 0.70  | 0.82  | 0.9 | 0.41 | -0.60 | 2.02  |
| A007331_01 | At2g47590 | photolyase/blue-light receptor   | 0 | -0.92 | -1.00 | -0.96 | -0.93 | -0.83 | -1.18 | 1.1 | 0.14 | 2.54  | -1.25 |
| A007333_01 | At2g29540 | DNA-directed RNA polymeras       | 0 | -0.88 | -1.00 | -0.82 | -1.58 | -1.63 | -1.73 | 0.8 | 0.55 | 2.73  | 0.07  |
| A007334_01 | At2g14750 | putative adenosine phosphos      | 0 | 0.10  | 0.45  | 0.83  | 0.91  | 0.86  | 1.70  | 0.9 | 0.31 | -1.68 | -1.12 |
| A007336_01 | At2g28400 | hypothetical protein; protein ic | 0 | 2.34  | 2.26  | 2.10  | 1.73  | 1.64  | 2.56  | 1.0 | 0.16 | -1.50 | 1.21  |
| A007338_01 | At2g29530 | expressed protein; protein id:   | 0 | -1.08 | -1.14 | -1.03 | -1.51 | -1.75 | -1.58 | 1.6 | 0.06 | 2.75  | -0.34 |
| A007342_01 | At2g17280 | unknown protein; protein id: A   | 0 | -1.14 | -1.45 | -1.50 | -2.08 | -1.98 | -2.02 | 1.3 | 0.06 | 2.79  | -0.30 |
| A007347_01 | At2g23320 | WRKY family transcription fac    | 0 | 1.75  | 1.28  | 0.97  | 1.23  | 1.30  | 1.35  | 0.9 | 0.26 | -1.33 | 1.20  |
| A007351_01 | At2g33360 | hypothetical protein; protein ic | 0 | 0.43  | 0.46  | 0.61  | 0.73  | 0.86  | 1.31  | 1.1 | 0.14 | -1.85 | -0.74 |
| A007353_01 | At2g32870 | unknown protein; protein id: A   | 0 | 1.91  | 2.86  | 3.46  | 4.48  | 4.53  | 4.97  | 0.7 | 1.61 | -2.04 | -0.57 |
| A007357_01 | At2g37190 | 60S ribosomal protein L12; pr    | 0 | -0.43 | -1.26 | -1.19 | -2.13 | -2.53 | -2.39 | 1.4 | 0.06 | 2.66  | 0.62  |
| A007361_01 | At2g20960 | pEARL1 4 protein; protein id: /  | 0 | 0.35  | 0.45  | 0.66  | 0.89  | 1.04  | 1.09  | 1.1 | 0.14 | -1.96 | -0.90 |
| A007362_01 | At2g33830 | auxin-regulated protein; prote   | 0 | 3.11  | 2.93  | 2.98  | 2.33  | 1.88  | 1.20  | 0.7 | 1.20 | -0.67 | 1.87  |
| A007366_01 | At2g17760 | putative chloroplast nucleoid l  | 0 | 0.59  | 0.60  | 0.68  | 0.67  | 0.89  | 1.14  | 0.9 | 0.31 | -1.95 | -0.13 |
| A007370_01 | At2g37270 | 40S ribosomal protein S5; pro    | 0 | 0.05  | -0.10 | -0.26 | -0.75 | -0.95 | -1.53 | 0.6 | 4.47 | 2.24  | 1.17  |
| A007373_01 | At2g44650 | chloroplast chaperonin 10; pr    | 0 | -0.43 | -0.57 | -0.61 | -0.82 | -0.91 | -1.19 | 0.7 | 2.21 | 2.75  | 0.20  |

|            |           |                                   |   |       |       |       |       |       |       |     |      |       |       |
|------------|-----------|-----------------------------------|---|-------|-------|-------|-------|-------|-------|-----|------|-------|-------|
| A007385_01 | At2g40460 | putative PTR2 family peptide      | 0 | -0.09 | 0.50  | 0.74  | 1.22  | 1.19  | 1.23  | 0.7 | 1.61 | -1.73 | -1.29 |
| A007422_01 | At2g48020 | putative sugar transporter; pr    | 0 | 1.19  | 1.23  | 0.98  | 1.04  | 1.12  | 1.27  | 0.9 | 0.27 | -1.72 | 1.04  |
| A007428_01 | At2g16990 | putative tetracycline transport   | 0 | -1.21 | -0.86 | -0.51 | -0.36 | -0.44 | -0.49 | 0.6 | 2.21 | 0.93  | -2.48 |
| A007429_01 | At2g26690 | putative nitrate transporter; pr  | 0 | 1.64  | 2.32  | 2.52  | 2.01  | 1.87  | 2.79  | 1.3 | 0.06 | -1.77 | 0.57  |
| A007431_01 | At2g28200 | putative zinc-finger protein; pr  | 0 | 0.87  | 0.84  | 0.84  | 1.00  | 1.01  | 1.11  | 0.7 | 0.96 | -1.96 | 0.40  |
| A007433_01 | At2g45220 | pectinesterase family; protein    | 0 | 1.32  | 2.67  | 3.01  | 3.23  | 2.62  | 2.98  | 2.2 | 0.06 | -1.85 | 0.04  |
| A007475_01 | At2g05790 | glycosyl hydrolase family 17; j   | 0 | -0.79 | -2.09 | -2.30 | -3.86 | -4.27 | -3.85 | 1.1 | 0.14 | 2.66  | 0.57  |
| A007513_01 | At2g40660 | putative methionyl-tRNA syntl     | 0 | -0.77 | -0.97 | -0.95 | -1.01 | -0.93 | -0.97 | 0.7 | 1.20 | 2.65  | -1.05 |
| A007530_01 | At2g03550 | putative esterase; protein id: j  | 0 | 1.26  | 1.43  | 1.42  | 1.42  | 1.22  | 0.98  | 0.9 | 0.31 | -1.45 | 1.21  |
| A007535_01 | At2g15960 | expressed protein; protein id: j  | 0 | 2.67  | 2.86  | 2.59  | 2.40  | 2.07  | 2.31  | 1.3 | 0.06 | -1.44 | 1.43  |
| A007555_01 | At2g44640 | expressed protein; protein id: j  | 0 | -1.01 | -1.46 | -1.49 | -1.01 | -1.43 | NA    | 0.9 | 0.27 | NA    | NA    |
| A007577_01 | At2g42010 | phospholipase D (PLDbeta); j      | 0 | 0.72  | 1.10  | 1.02  | 1.07  | 0.54  | 1.34  | 0.9 | 0.37 | -1.55 | 0.60  |
| A007590_01 | At2g23450 | putative protein kinase; protei   | 0 | 1.84  | 1.76  | 1.46  | 1.32  | 1.57  | 1.82  | 1.0 | 0.16 | -1.55 | 1.21  |
| A007618_01 | At2g38080 | laccase (diphenol oxidase), p     | 0 | -0.28 | 1.05  | 1.79  | 3.23  | 2.73  | 2.21  | 1.0 | 0.18 | -1.57 | -1.21 |
| A007622_01 | At2g18330 | putative AAA-type ATPase; p       | 0 | -1.42 | -1.53 | -1.41 | -1.88 | -1.80 | -1.75 | 1.1 | 0.10 | 2.71  | -0.81 |
| A007627_01 | At2g42220 | rhodanese-like domain protei      | 0 | -0.77 | -1.12 | -1.38 | -1.49 | -1.55 | -2.35 | 0.7 | 1.61 | 2.70  | 0.13  |
| A007649_01 | At2g46620 | hypothetical protein; protein ic  | 0 | 0.09  | 0.50  | 0.69  | 1.11  | 0.87  | 0.84  | 1.3 | 0.06 | -1.76 | -0.94 |
| A007656_01 | At2g44130 | expressed protein; protein id: j  | 0 | 2.89  | 2.21  | 1.50  | 0.60  | 1.18  | 0.45  | 0.9 | 0.26 | 0.18  | 2.12  |
| A007696_01 | At2g39400 | putative phospholipase; prote     | 0 | 3.23  | 3.18  | 3.14  | 3.34  | 2.96  | 2.82  | 1.0 | 0.16 | -1.63 | 1.12  |
| A007704_01 | At2g39570 | expressed protein; protein id: j  | 0 | 1.41  | 1.19  | 1.22  | 0.92  | 1.20  | 0.77  | 0.8 | 0.66 | -1.08 | 1.55  |
| A007723_01 | At2g48120 | pale cress protein; protein id: j | 0 | -0.69 | -0.84 | -0.94 | -1.52 | -0.80 | NA    | 0.7 | 2.21 | NA    | NA    |
| A007727_01 | At2g31950 | molybdopterin synthase (CN)       | 0 | 0.97  | 0.97  | 1.01  | 1.12  | 1.40  | 1.50  | 0.8 | 0.66 | -2.01 | 0.04  |
| A007730_01 | At2g44310 | expressed protein; protein id: j  | 0 | -0.04 | -0.49 | -0.38 | -0.57 | -0.69 | -1.00 | 1.2 | 0.06 | 2.50  | 0.65  |
| A007746_01 | At2g40890 | cytochrome p450, putative; pr     | 0 | 0.52  | 0.96  | 1.33  | 2.45  | 2.01  | 1.43  | 1.0 | 0.20 | -1.69 | -0.75 |
| A007750_01 | At2g33480 | putative NAM (no apical meris     | 0 | 2.28  | 2.58  | 2.62  | 2.66  | 2.47  | 2.97  | 1.2 | 0.06 | -1.90 | 0.67  |
| A007753_01 | At2g37240 | expressed protein; protein id: j  | 0 | 0.36  | 0.86  | 0.92  | 1.23  | 1.16  | 1.13  | 1.1 | 0.10 | -1.95 | -0.49 |
| A007756_01 | At2g41250 | hypothetical protein; protein ic  | 0 | 1.21  | 1.23  | 1.07  | 0.69  | 0.63  | 1.39  | 0.6 | 2.21 | -1.15 | 1.34  |
| A007768_01 | At2g42620 | F-box protein ORE9, AtFBL7;       | 0 | 1.25  | 1.08  | 0.86  | 0.36  | 0.21  | 0.43  | 0.6 | 2.21 | 0.09  | 2.20  |
| A007770_01 | At2g39660 | putative protein kinase; protei   | 0 | 0.44  | 0.72  | 1.03  | 1.29  | 1.37  | 1.69  | 1.1 | 0.10 | -1.96 | -0.81 |
| A007776_01 | At2g37230 | unknown protein; protein id: A    | 0 | -0.98 | -1.10 | -1.08 | -1.42 | -1.23 | -1.73 | 0.6 | 2.21 | 2.72  | -0.40 |
| A007781_01 | At2g21620 | auxin-regulated protein; prote    | 0 | 1.46  | 1.88  | 1.84  | 1.79  | 1.94  | 2.23  | 1.5 | 0.06 | -1.98 | 0.42  |
| A007786_01 | At2g36410 | expressed protein; protein id: j  | 0 | 0.74  | 1.05  | 1.11  | 0.97  | 1.12  | 1.20  | 0.8 | 0.55 | -1.98 | 0.34  |
| A007791_01 | At2g26800 | putative hydroxymethylglutary     | 0 | 0.73  | 0.76  | 0.68  | 1.14  | 0.95  | 0.90  | 1.0 | 0.18 | -1.91 | 0.21  |
| A007794_01 | At2g01850 | xyloglucan endotransglycosyl.     | 0 | 1.34  | 1.58  | 1.46  | 1.38  | 1.24  | 1.57  | 1.5 | 0.06 | -1.69 | 1.03  |
| A007795_01 | At2g47270 | expressed protein; protein id: j  | 0 | 1.76  | 1.66  | 1.35  | 0.38  | 0.40  | 0.68  | 0.8 | 0.81 | 0.05  | 2.16  |
| A007797_01 | At2g32150 | putative hydrolase; protein id: j | 0 | 3.64  | 2.80  | 1.63  | 0.45  | 0.11  | 0.10  | 0.9 | 0.41 | 0.67  | 2.21  |
| A007804_01 | At2g40480 | hypothetical protein; protein ic  | 0 | -0.82 | -0.86 | -1.09 | -1.24 | -1.41 | -1.49 | 0.9 | 0.41 | 2.80  | -0.14 |
| A007805_01 | At2g31170 | putative cysteinyl-tRNA synth     | 0 | -0.57 | -0.61 | -0.73 | -0.94 | -0.75 | -1.29 | 0.8 | 0.81 | 2.65  | -0.08 |
| A007811_01 | At2g28150 | hypothetical protein; protein ic  | 0 | -0.82 | -1.08 | -1.03 | -0.86 | -0.88 | -1.07 | 0.9 | 0.26 | 2.47  | -1.31 |
| A007812_01 | At2g23840 | unknown protein; protein id: A    | 0 | 0.60  | 1.32  | 1.66  | 2.41  | 2.32  | 2.57  | 1.2 | 0.06 | -1.96 | -0.89 |
| A007815_01 | At2g43550 | putative trypsin inhibitor; prote | 0 | -1.41 | -1.77 | -1.92 | -2.60 | -2.84 | -2.78 | 0.7 | 1.20 | 2.80  | -0.01 |
| A007816_01 | At2g43530 | putative trypsin inhibitor; prote | 0 | -0.91 | -1.22 | -1.54 | -1.96 | -2.24 | -2.45 | 0.9 | 0.27 | 2.76  | 0.29  |
| A007829_01 | At2g46360 | hypothetical protein; protein ic  | 0 | -0.03 | 0.50  | 0.81  | 0.97  | 0.90  | 1.32  | 1.0 | 0.18 | -1.76 | -1.19 |
| A007830_01 | At2g29970 | expressed protein; protein id: j  | 0 | 0.56  | 0.80  | 1.06  | 1.42  | 1.30  | 1.40  | 1.3 | 0.06 | -2.01 | -0.57 |

|            |           |                                  |   |       |       |       |       |       |       |     |      |       |       |
|------------|-----------|----------------------------------|---|-------|-------|-------|-------|-------|-------|-----|------|-------|-------|
| A007844_01 | At2g36320 | expressed protein; protein id:   | 0 | 1.50  | 1.62  | 1.84  | 2.16  | 2.01  | 2.27  | 1.4 | 0.06 | -2.03 | 0.15  |
| A007860_01 | At2g03310 | hypothetical protein; protein ic | 0 | 1.46  | 2.26  | 2.63  | 3.06  | 3.10  | 2.69  | 1.8 | 0.06 | -2.00 | -0.18 |
| A007862_01 | At2g43650 | unknown protein; protein id: A   | 0 | -0.50 | -0.57 | -0.42 | -0.82 | -1.08 | -0.83 | 1.2 | 0.06 | 2.48  | 0.12  |
| A007876_01 | At2g40270 | putative protein kinase; protei  | 0 | 0.48  | 0.92  | 0.99  | 1.22  | 0.90  | 0.93  | 0.7 | 1.61 | -1.70 | 0.12  |
| A007894_01 | At2g17800 | Rac-like GTP-binding protein     | 0 | -0.73 | -0.74 | -0.78 | -0.94 | -1.01 | -0.87 | 0.7 | 1.20 | 2.70  | -0.74 |
| A007897_01 | At2g16790 | putative gluconokinase; prote    | 0 | 1.01  | 1.25  | 1.89  | 2.65  | 2.48  | 2.29  | 0.7 | 1.20 | -1.95 | -0.63 |
| A007903_01 | At2g44050 | 6,7-dimethyl-8-ribityllumazine   | 0 | -0.62 | -0.79 | -0.75 | -0.80 | -1.02 | -0.97 | 1.0 | 0.20 | 2.76  | -0.57 |
| A007929_01 | At2g44770 | expressed protein; protein id:   | 0 | -1.01 | -1.09 | -1.23 | -1.36 | -1.44 | -1.41 | 0.9 | 0.27 | 2.77  | -0.61 |
| A007931_01 | At2g26960 | myb family transcription facto   | 0 | -0.49 | -0.84 | -0.84 | -1.02 | -0.66 | -0.93 | 0.7 | 1.61 | 2.58  | -0.66 |
| A007949_01 | At2g24090 | putative chloroplast ribosoma    | 0 | -0.76 | -1.19 | -1.20 | -1.19 | -1.26 | -1.76 | 1.1 | 0.10 | 2.72  | -0.39 |
| A007959_01 | At2g45980 | expressed protein; protein id:   | 0 | 1.05  | 1.02  | 1.17  | 1.41  | 1.17  | 1.12  | 0.9 | 0.37 | -1.83 | 0.57  |
| A007964_01 | At2g06850 | xyloglucan endotransglycosyl.    | 0 | -0.21 | -0.86 | -1.65 | -2.69 | -3.41 | -3.42 | 1.3 | 0.06 | 2.50  | 0.99  |
| A007966_01 | At2g31800 | putative protein kinase; protei  | 0 | 1.37  | 1.71  | 1.66  | 1.66  | 1.47  | 1.50  | 1.1 | 0.06 | -1.73 | 0.94  |
| A007974_01 | At2g15050 | putative lipid transfer protein; | 0 | 0.24  | 1.18  | 1.16  | 2.01  | 1.83  | 1.18  | 1.0 | 0.20 | -1.66 | -0.66 |
| A007975_01 | At2g22420 | putative peroxidase; protein ic  | 0 | -0.20 | -1.02 | -1.09 | -1.32 | -1.02 | -1.04 | 0.9 | 0.41 | 2.30  | -0.17 |
| A007977_01 | At2g18050 | histone H1; protein id: At2g18   | 0 | 3.03  | 2.95  | 3.10  | 3.10  | 2.65  | 3.02  | 1.3 | 0.06 | -1.69 | 1.06  |
| A007989_01 | At2g28320 | unknown protein; protein id: A   | 0 | 0.43  | 0.53  | 0.62  | 0.70  | 0.17  | 1.20  | 1.0 | 0.18 | -1.29 | 0.05  |
| A007993_01 | At2g31810 | putative acetolactate synthas    | 0 | 1.59  | 1.36  | 1.17  | 0.82  | 0.80  | 0.60  | 0.7 | 2.21 | -0.45 | 2.06  |
| A008004_01 | At2g26570 | unknown protein; protein id: A   | 0 | 0.40  | 0.57  | 0.69  | 0.83  | 1.18  | 1.08  | 1.3 | 0.06 | -1.96 | -0.75 |
| A008005_01 | At2g27840 | unknown protein; protein id: A   | 0 | -0.88 | -0.98 | -0.78 | -1.61 | -1.40 | -1.41 | 0.7 | 0.96 | 2.68  | -0.17 |
| A008042_01 | At2g03730 | putative uridylyl transferase; p | 0 | 0.78  | 1.18  | 1.54  | 1.85  | 1.65  | 1.66  | 1.1 | 0.10 | -1.94 | -0.24 |
| A008043_01 | At2g36020 | expressed protein; protein id:   | 0 | -0.14 | 0.06  | 0.47  | 0.64  | 0.84  | 1.35  | 1.0 | 0.20 | -1.51 | -1.60 |
| A008055_01 | At2g02320 | hypothetical protein; protein ic | 0 | -1.23 | -1.74 | -1.68 | -2.94 | -3.30 | -3.15 | 1.9 | 0.06 | 2.76  | 0.28  |
| A008056_01 | At2g38540 | putative nonspecific lipid-tran: | 0 | -0.83 | -1.38 | -1.30 | -2.95 | -3.48 | -3.07 | 1.3 | 0.06 | 2.64  | 0.63  |
| A008060_01 | At2g05210 | hypothetical protein; protein ic | 0 | -0.48 | -0.81 | -0.96 | -1.35 | -1.53 | -1.43 | 1.5 | 0.06 | 2.74  | 0.31  |
| A008068_01 | At2g31130 | expressed protein; protein id:   | 0 | 0.82  | 0.78  | 0.89  | 1.40  | 1.27  | 1.59  | 0.9 | 0.41 | -2.00 | -0.41 |
| A008131_01 | At2g03980 | putative GDSL-motif lipase/hy    | 0 | -0.73 | -1.08 | -1.20 | -1.81 | -1.47 | -1.46 | 0.7 | 1.20 | 2.71  | -0.08 |
| A008137_01 | At2g45560 | putative cytochrome P450; pr     | 0 | 0.14  | 0.55  | 0.52  | 1.00  | 0.71  | -0.06 | 0.7 | 1.20 | -0.72 | -0.11 |
| A008143_01 | At2g27590 | expressed protein; protein id:   | 0 | -0.44 | -0.86 | -0.63 | -1.16 | -1.04 | -1.33 | 1.1 | 0.14 | 2.76  | 0.09  |
| A008183_01 | At2g26030 | F-box protein; protein id: At2g  | 0 | 1.04  | 0.91  | 0.83  | 0.84  | 0.69  | 0.86  | 0.7 | 0.96 | -1.37 | 1.37  |
| A008191_01 | At2g22860 | unknown protein; protein id: A   | 0 | 0.03  | 0.56  | 0.70  | 0.74  | 0.68  | 1.41  | 0.8 | 0.48 | -1.67 | -0.99 |
| A008198_01 | At2g26900 | putative Na+ dependent ileal     | 0 | -0.93 | -0.95 | -0.98 | -0.87 | -1.15 | -1.32 | 0.8 | 0.48 | 2.67  | -0.81 |
| A008212_01 | At2g23930 | putative small nuclear ribonuc   | 0 | -1.12 | -1.14 | -0.97 | -1.23 | -1.25 | -1.31 | 0.8 | 0.81 | 2.66  | -1.04 |
| A008215_01 | At2g07040 | leucine-rich repeat transmem     | 0 | -0.19 | 0.14  | 0.54  | 0.54  | 0.68  | 1.12  | 0.7 | 1.20 | -1.51 | -1.52 |
| A008262_01 | At2g46100 | unknown protein; protein id: A   | 0 | 0.77  | 1.25  | 1.21  | 1.36  | 1.42  | 1.47  | 1.3 | 0.06 | -1.98 | 0.08  |
| A008270_01 | At2g46210 | putative fatty acid desaturase   | 0 | -0.06 | 0.39  | 0.75  | 0.85  | 0.91  | 1.35  | 1.0 | 0.26 | -1.72 | -1.34 |
| A008272_01 | At2g40990 | unknown protein; protein id: A   | 0 | 0.00  | 0.41  | 0.68  | 1.01  | 1.09  | 1.46  | 0.8 | 0.81 | -1.76 | -1.35 |
| A008305_01 | At2g42840 | En/Spm-like transposon prote     | 0 | -2.15 | -4.13 | -4.07 | -4.18 | -3.52 | -3.05 | 1.1 | 0.06 | 2.42  | -0.94 |
| A008330_01 | At2g24550 | expressed protein; protein id:   | 0 | 1.04  | 1.43  | 1.91  | 2.45  | 1.91  | 2.03  | 0.9 | 0.27 | -1.95 | -0.25 |
| A008335_01 | At2g34560 | katanin like protein             | 0 | -0.47 | -0.82 | -1.10 | -1.13 | -0.80 | -1.28 | 0.8 | 0.96 | 2.67  | -0.20 |
| A008350_01 | At2g04730 | hypothetical protein; protein ic | 0 | -0.78 | -1.16 | -1.22 | -0.93 | -1.47 | -1.08 | 1.0 | 0.26 | 2.52  | -0.76 |
| A008386_01 | At2g05920 | subtilisin-like serine protease; | 0 | -0.79 | -0.67 | -0.61 | -0.77 | -1.03 | -1.04 | 0.6 | 4.47 | 2.53  | -0.46 |
| A008415_01 | At2g18550 | homeodomain protein; proteir     | 0 | 3.08  | 2.41  | 1.90  | 1.29  | 0.97  | 0.85  | 0.8 | 0.66 | -0.04 | 2.15  |
| A008432_01 | At2g11910 | expressed protein; protein id:   | 0 | -0.46 | -0.66 | -0.51 | -0.82 | -1.03 | -1.04 | 1.0 | 0.16 | 2.78  | 0.05  |



|            |           |                                  |   |       |       |       |       |       |       |     |      |       |       |
|------------|-----------|----------------------------------|---|-------|-------|-------|-------|-------|-------|-----|------|-------|-------|
| A008445_01 | At2g43030 | 50S ribosomal protein L3; pro    | 0 | -0.62 | -0.87 | -0.91 | -0.90 | -1.12 | -1.40 | 0.8 | 0.55 | 2.76  | -0.23 |
| A008452_01 | At2g39390 | 60S ribosomal protein L35; pr    | 0 | -0.84 | -1.12 | -1.11 | -1.49 | -1.72 | -1.87 | 0.9 | 0.26 | 2.81  | 0.00  |
| A008454_01 | At2g20730 | unknown protein; protein id: A   | 0 | 1.11  | 0.97  | 1.05  | 1.18  | 1.22  | 1.06  | 0.9 | 0.27 | -1.79 | 0.65  |
| A008459_01 | At2g45210 | putative auxin-regulated prote   | 0 | 2.01  | 2.56  | 2.88  | 3.04  | 3.29  | 3.64  | 2.2 | 0.06 | -2.06 | -0.01 |
| A008472_01 | At2g37040 | phenylalanine ammonia lyase      | 0 | -0.89 | -0.67 | 0.27  | 1.72  | 1.07  | 0.95  | 0.7 | 1.61 | -1.00 | -1.90 |
| A008481_01 | At2g21120 | unknown protein; protein id: A   | 0 | 1.24  | 1.21  | 1.33  | 1.01  | 1.32  | 1.19  | 0.9 | 0.26 | -1.64 | 1.03  |
| A008486_01 | At2g28380 | expressed protein; protein id:   | 0 | -0.33 | -0.62 | -0.58 | -0.62 | -0.76 | -1.03 | 0.6 | 2.21 | 2.71  | 0.01  |
| A008500_01 | At2g35940 | BEL1-like homeobox 1 protein     | 0 | 1.22  | 1.78  | 2.05  | 2.17  | 2.13  | 2.62  | 1.9 | 0.06 | -2.04 | -0.11 |
| A008511_01 | At2g24290 | expressed protein; protein id:   | 0 | -0.63 | -0.91 | -0.82 | -0.62 | -0.72 | -1.19 | 0.8 | 0.55 | 2.47  | -0.91 |
| A008512_01 | At5g18380 | putative 40S ribosomal protei    | 0 | -0.08 | -0.81 | -0.80 | -1.36 | -1.48 | -1.59 | 0.7 | 1.61 | 2.58  | 0.77  |
| A008532_01 | At2g33150 | 3-ketoacyl-CoA thiolase; prote   | 0 | 1.08  | 1.07  | 0.90  | 1.02  | 1.26  | 1.44  | 0.9 | 0.37 | -1.86 | 0.38  |
| A008534_01 | At2g37520 | unknown protein; protein id: A   | 0 | 0.63  | 0.64  | 0.83  | 0.82  | 0.66  | 1.20  | 0.8 | 0.55 | -1.87 | 0.06  |
| A008541_01 | At2g40670 | putative two-component respr     | 0 | 0.43  | 0.35  | 0.01  | -0.15 | 0.06  | 1.49  | 0.9 | 0.26 | -0.52 | -0.22 |
| A008548_01 | At2g39770 | GDP-mannose pyrophosphor         | 0 | -0.41 | -0.89 | -0.88 | -1.07 | -1.21 | -1.19 | 0.7 | 1.20 | 2.75  | 0.10  |
| A008549_01 | At2g05990 | enoyl-ACP reductase (enr-A);     | 0 | -1.20 | -1.64 | -1.77 | -2.14 | -2.47 | -2.64 | 1.3 | 0.06 | 2.81  | -0.06 |
| A008562_01 | At2g02990 | ribonuclease, RNS1; protein i    | 0 | 3.56  | 3.18  | 2.33  | 0.87  | 0.06  | 0.97  | 1.0 | 0.26 | 0.35  | 2.19  |
| A008572_01 | At2g42280 | bHLH protein; protein id: At2g   | 0 | 0.43  | 0.96  | 1.43  | 1.57  | 1.68  | 1.64  | 0.6 | 2.21 | -1.96 | -0.75 |
| A008576_01 | At2g46340 | putative photomorphogenesis      | 0 | 0.70  | 1.19  | 1.20  | 1.01  | 0.78  | 1.40  | 1.1 | 0.10 | -1.58 | 0.54  |
| A008578_01 | At2g38400 | putative beta-alanine-pyruvat    | 0 | 1.90  | 1.29  | 0.71  | 0.29  | -0.10 | -0.13 | 0.7 | 1.61 | 0.81  | 2.18  |
| A008582_01 | At2g36950 | expressed protein; protein id:   | 0 | 1.84  | 2.26  | 2.29  | 2.39  | 2.73  | 3.20  | 1.5 | 0.06 | -2.03 | 0.10  |
| A008583_01 | At2g17250 | hypothetical protein; protein ic | 0 | -0.72 | -0.95 | -0.99 | -1.41 | -1.22 | -1.30 | 0.9 | 0.41 | 2.77  | -0.22 |
| A008587_01 | At2g28000 | putative rubisco subunit bindi   | 0 | -1.68 | -1.78 | -1.70 | -1.99 | -1.97 | -2.42 | 0.9 | 0.31 | 2.73  | -0.77 |
| A008601_01 | At2g03240 | unknown protein; protein id: A   | 0 | 0.31  | -0.11 | -0.57 | -1.11 | -1.79 | -1.67 | 1.6 | 0.06 | 2.24  | 1.34  |
| A008605_01 | At2g22990 | putative serine carboxypeptid    | 0 | 2.09  | 2.44  | 2.61  | 3.06  | 2.99  | 3.31  | 1.5 | 0.06 | -2.05 | 0.12  |
| A008608_01 | At2g47470 | putative protein disulfide-isor  | 0 | -1.31 | -1.32 | -1.33 | -1.45 | -1.59 | -1.77 | 1.1 | 0.10 | 2.73  | -0.78 |
| A008621_01 | At2g18390 | putative ADP-ribosylation fact   | 0 | -0.59 | -0.96 | -0.95 | -1.12 | -1.08 | -1.26 | 1.1 | 0.14 | 2.79  | -0.32 |
| A008637_01 | At2g43400 | putative electron transfer flav  | 0 | 1.17  | 0.98  | 0.78  | 0.62  | 0.75  | 0.69  | 0.7 | 1.20 | -0.87 | 1.68  |
| A008645_01 | At2g43460 | 60S ribosomal protein L38; pr    | 0 | -1.13 | -1.23 | -1.16 | -1.71 | -1.88 | -1.93 | 1.4 | 0.06 | 2.79  | -0.19 |
| A008648_01 | At2g43540 | expressed protein; protein id:   | 0 | 0.39  | 0.44  | 0.63  | 1.02  | 1.22  | 0.85  | 0.8 | 0.96 | -1.77 | -0.89 |
| A008652_01 | At2g46470 | OXA1 protein (OXA1p), putat      | 0 | -0.64 | -1.10 | -1.20 | -1.41 | -1.41 | -1.74 | 1.0 | 0.18 | 2.79  | -0.04 |
| A008655_01 | At2g40800 | unknown protein; protein id: A   | 0 | -0.98 | -0.98 | -0.98 | -1.14 | -1.48 | -1.31 | 1.0 | 0.18 | 2.71  | -0.51 |
| A008663_01 | At2g41840 | 40S ribosomal protein S2; pro    | 0 | -0.30 | -0.80 | -0.82 | -1.50 | -1.40 | -1.48 | 0.9 | 0.41 | 2.67  | 0.53  |
| A008664_01 | At2g45170 | AtAPG8e; putative microtubul     | 0 | 1.67  | 1.74  | 1.77  | 1.91  | 1.91  | 2.41  | 1.2 | 0.06 | -1.96 | 0.35  |
| A008667_01 | At2g46030 | E2, ubiquitin-conjugating enzy   | 0 | 1.37  | 1.37  | 1.20  | 1.12  | 1.05  | 1.69  | 1.0 | 0.26 | -1.62 | 0.94  |
| A008668_01 | At2g37860 | unknown protein; protein id: A   | 0 | -1.12 | -1.25 | -1.18 | -1.47 | -1.16 | -1.50 | 1.0 | 0.16 | 2.66  | -0.96 |
| A008673_01 | At2g30660 | 3-hydroxyisobutyryl-coenzym      | 0 | 0.72  | 1.03  | 1.23  | 1.48  | 1.46  | 1.54  | 1.2 | 0.06 | -2.06 | -0.33 |
| A008682_01 | At2g39670 | expressed protein; protein id:   | 0 | -0.91 | -1.02 | -0.97 | -1.02 | -1.03 | -1.35 | 1.1 | 0.14 | 2.70  | -0.85 |
| A008686_01 | At2g45440 | putative dihydrodipicolinate sy  | 0 | -0.32 | -0.50 | -0.64 | -1.27 | -1.38 | -1.11 | 0.8 | 0.96 | 2.57  | 0.66  |
| A008707_01 | At2g45180 | expressed protein; protein id:   | 0 | 0.19  | 0.85  | 1.01  | 1.30  | 0.89  | 0.57  | 0.7 | 2.21 | -1.38 | -0.18 |
| A008722_01 | At2g18700 | putative trehalose-6-phospha     | 0 | 2.13  | 2.15  | 1.87  | 1.73  | 1.95  | 2.00  | 0.9 | 0.26 | -1.60 | 1.22  |
| A008727_01 | At2g41650 | unknown protein; protein id: A   | 0 | -0.95 | -1.29 | -1.29 | -2.15 | -2.53 | -2.46 | 1.9 | 0.06 | 2.76  | 0.31  |
| A008731_01 | At2g28900 | putative membrane channel p      | 0 | -0.60 | -0.97 | -1.14 | -1.45 | -1.69 | -2.06 | 0.8 | 0.48 | 2.74  | 0.34  |
| A008733_01 | At2g17450 | putative RING zinc finger prot   | 0 | 1.13  | 1.14  | 1.21  | 1.29  | 1.23  | 1.16  | 0.9 | 0.26 | -1.81 | 0.80  |
| A008753_01 | At2g41950 | hypothetical protein; protein ic | 0 | -1.35 | -1.06 | -0.90 | -0.88 | -0.48 | -1.02 | 1.2 | 0.06 | 1.63  | -2.10 |

|            |           |                                   |   |       |       |       |       |       |       |     |      |       |       |
|------------|-----------|-----------------------------------|---|-------|-------|-------|-------|-------|-------|-----|------|-------|-------|
| A008795_01 | At2g04690 | unknown protein; protein id: A    | 0 | 0.96  | 0.79  | 0.78  | 1.01  | 1.03  | 0.76  | 0.7 | 1.61 | -1.65 | 0.78  |
| A008807_01 | At2g46860 | putative inorganic pyrophosph     | 0 | 0.78  | 0.91  | 1.13  | 1.02  | 1.32  | 1.43  | 0.9 | 0.31 | -2.00 | -0.04 |
| A008819_01 | At2g47050 | putative pectinesterase; prote    | 0 | 0.41  | 0.73  | 0.87  | 0.79  | 0.81  | 1.34  | 0.7 | 1.20 | -1.88 | -0.33 |
| A008821_01 | At2g43141 | snoRNA gene At2g43141             | 0 | -0.79 | -1.28 | -1.05 | -1.92 | -1.80 | -1.47 | 0.7 | 1.61 | 2.65  | -0.05 |
| A008855_01 | At2g42740 | 60S ribosomal protein L11B; j     | 0 | -0.46 | -0.65 | -0.72 | -1.12 | -1.24 | -1.14 | 0.8 | 0.81 | 2.74  | 0.30  |
| A008857_01 | At2g32690 | unknown protein; protein id: A    | 0 | -1.07 | -0.77 | -1.10 | -1.68 | -2.93 | -3.32 | 1.4 | 0.06 | 2.44  | 0.64  |
| A008873_01 | At3g04070 | NAM-like protein (no apical m     | 0 | 3.51  | 3.19  | 2.68  | 1.85  | 1.28  | 2.48  | 1.0 | 0.14 | -0.70 | 1.90  |
| A008881_01 | At3g02180 | expressed protein; protein id:    | 0 | -0.30 | -0.63 | -0.97 | -1.26 | -1.67 | -1.85 | 1.8 | 0.06 | 2.62  | 0.72  |
| A008883_01 | At3g51010 | expressed protein; protein id:    | 0 | -0.80 | -1.21 | -1.26 | -1.53 | -1.47 | -1.65 | 0.8 | 0.66 | 2.81  | -0.25 |
| A008904_01 | At3g62870 | 60S RIBOSOMAL PROTEIN             | 0 | -0.71 | -1.12 | -1.13 | -1.83 | -2.04 | -2.03 | 0.8 | 0.48 | 2.75  | 0.34  |
| A008913_01 | At3g03920 | putative GAR1 protein; protei     | 0 | -0.70 | -0.84 | -0.66 | -1.19 | -1.13 | -1.32 | 0.8 | 0.55 | 2.72  | -0.12 |
| A008920_01 | At3g17160 | unknown protein; protein id: A    | 0 | -1.16 | -1.88 | -1.55 | -1.91 | -2.14 | -2.32 | 1.4 | 0.06 | 2.78  | -0.42 |
| A008926_01 | At3g51800 | putative nuclear DNA-binding      | 0 | -0.86 | -0.88 | -0.90 | -1.29 | -1.33 | -1.54 | 1.1 | 0.14 | 2.74  | -0.11 |
| A008929_01 | At3g62300 | putative protein; protein id: At  | 0 | -0.73 | -0.90 | -0.95 | -1.18 | -1.08 | -1.27 | 0.9 | 0.41 | 2.80  | -0.42 |
| A008934_01 | At3g20050 | t-complex polypeptide 1 hom       | 0 | -0.53 | -0.77 | -0.78 | -1.16 | -0.78 | -1.13 | 0.9 | 0.27 | 2.68  | -0.24 |
| A008937_01 | At3g53020 | 60S ribosomal protein - like; p   | 0 | -0.53 | -0.68 | -0.73 | -1.20 | -1.20 | -1.29 | 0.9 | 0.37 | 2.77  | 0.23  |
| A008938_01 | At3g57410 | villin 3 fragment; protein id: At | 0 | 0.78  | 0.95  | 0.79  | 0.60  | 0.71  | 1.14  | 0.6 | 4.47 | -1.60 | 0.86  |
| A008944_01 | At3g22300 | putative 40S ribosomal protei     | 0 | -1.14 | -1.17 | -1.15 | -1.34 | -1.41 | -1.54 | 0.9 | 0.37 | 2.75  | -0.77 |
| A008950_01 | At3g11900 | putative amino acid transport     | 0 | 0.28  | 0.55  | 0.65  | 0.90  | 1.12  | 1.02  | 1.0 | 0.16 | -1.96 | -0.87 |
| A008958_01 | At3g61180 | putative protein; protein id: At  | 0 | 0.49  | 0.64  | 1.02  | 1.23  | 1.10  | 1.03  | 0.8 | 0.96 | -1.95 | -0.48 |
| A008961_01 | At3g02150 | expressed protein; protein id:    | 0 | 0.79  | 1.24  | 1.34  | 1.58  | 1.70  | 2.17  | 1.3 | 0.06 | -2.03 | -0.44 |
| A008963_01 | At3g12740 | membrane protein common f         | 0 | 0.57  | 0.66  | 0.78  | 0.97  | 0.72  | 1.10  | 0.7 | 1.20 | -1.96 | -0.04 |
| A008969_01 | At3g63130 | RAN GTPase activating prote       | 0 | -0.87 | -1.10 | -0.94 | -1.38 | -1.34 | -1.39 | 0.9 | 0.31 | 2.80  | -0.49 |
| A008985_01 | At3g07310 | expressed protein; protein id:    | 0 | 0.82  | 0.76  | 0.83  | 0.90  | 1.02  | 0.81  | 0.6 | 2.21 | -1.80 | 0.63  |
| A008997_01 | At3g61200 | putative protein; protein id: At  | 0 | 0.43  | 0.73  | 0.67  | 1.11  | 0.88  | 0.87  | 1.0 | 0.18 | -1.93 | -0.23 |
| A009016_01 | At3g22310 | putative RNA helicase; protei     | 0 | -0.55 | -0.56 | -0.58 | -1.10 | -1.06 | -1.12 | 0.9 | 0.48 | 2.67  | 0.22  |
| A009031_01 | At3g56340 | 40S ribosomal protein S26 hc      | 0 | -0.67 | -1.02 | -0.98 | -1.59 | -1.61 | -1.58 | 1.1 | 0.14 | 2.78  | 0.12  |
| A009037_01 | At3g62720 | alpha galactosyltransferase-li    | 0 | 0.32  | 0.27  | -0.22 | -0.88 | -1.19 | -1.02 | 1.1 | 0.10 | 2.00  | 1.54  |
| A009044_01 | At3g62710 | glycosyl hydrolase family 3; p    | 0 | -0.47 | 0.04  | 0.35  | 0.32  | 0.90  | 1.11  | 0.9 | 0.31 | -1.29 | -1.78 |
| A009064_01 | At3g56140 | chloroplast lumen common pi       | 0 | 0.89  | 0.90  | 0.89  | 1.01  | 1.15  | 1.11  | 1.2 | 0.06 | -1.95 | 0.35  |
| A009077_01 | At3g25690 | unknown protein; protein id: A    | 0 | 1.04  | 1.57  | 1.41  | 1.23  | 1.02  | 1.27  | 0.8 | 0.66 | -1.51 | 1.09  |
| A009081_01 | At3g11380 | hypothetical protein; protein ic  | 0 | 0.38  | 0.75  | 0.80  | 0.78  | 0.89  | 1.28  | 0.7 | 2.21 | -1.94 | -0.39 |
| A009087_01 | At3g45140 | lipoxygenase AtLOX2; proteir      | 0 | -0.85 | -0.45 | -1.49 | -1.72 | -2.32 | -2.01 | 0.6 | 4.47 | 2.49  | 0.65  |
| A009088_01 | At3g04910 | putative mitogen activated pr     | 0 | 1.49  | 1.39  | 0.92  | 0.36  | 0.44  | 0.74  | 0.8 | 0.66 | -0.14 | 2.11  |
| A009102_01 | At3g62530 | putative protein; protein id: At  | 0 | -0.87 | -0.83 | -0.76 | -1.05 | -1.12 | -1.10 | 0.9 | 0.31 | 2.70  | -0.63 |
| A009105_01 | At3g09830 | putative protein kinase; protei   | 0 | 1.32  | 1.81  | 1.75  | 1.86  | 1.92  | 2.19  | 1.6 | 0.06 | -2.01 | 0.28  |
| A009107_01 | At3g57520 | glycosyl hydrolase family 36; j   | 0 | 1.62  | 1.39  | 1.06  | -0.39 | -0.23 | -0.13 | 0.8 | 0.81 | 0.92  | 2.08  |
| A009139_01 | At3g51600 | non-specific lipid transfer prot  | 0 | 1.30  | 1.51  | 0.77  | 0.62  | -0.02 | -0.14 | 0.9 | 0.31 | 0.53  | 2.10  |
| A009145_01 | At3g16220 | hypothetical protein; protein ic  | 0 | 0.71  | 0.90  | 0.85  | 0.98  | 1.33  | 1.41  | 0.9 | 0.27 | -2.01 | -0.26 |
| A009147_01 | At3g18130 | protein kinase C-receptor/G-p     | 0 | -1.04 | -1.63 | -1.62 | -2.42 | -2.50 | -2.64 | 1.3 | 0.06 | 2.78  | 0.16  |
| A009148_01 | At3g16250 | putative 2Fe-2S iron-sulfur cl    | 0 | 0.33  | 0.22  | -0.39 | -0.56 | -1.08 | -1.47 | 1.1 | 0.10 | 2.06  | 1.43  |
| A009187_01 | At3g28270 | At14a; protein id: At3g28270.     | 0 | 1.95  | 2.63  | 2.95  | 3.16  | 3.03  | 2.89  | 1.2 | 0.06 | -1.95 | 0.26  |
| A009196_01 | At3g55010 | phosphoribosylformylglycinar      | 0 | -0.84 | -1.02 | -0.95 | -1.32 | -1.27 | -1.33 | 1.0 | 0.18 | 2.80  | -0.46 |
| A009221_01 | At3g63310 | putative protein; protein id: At  | 0 | 0.64  | 0.96  | 0.92  | 0.81  | 1.12  | 1.23  | 0.7 | 2.21 | -1.97 | 0.06  |

|            |               |                                  |   |       |       |       |       |       |       |     |      |       |       |
|------------|---------------|----------------------------------|---|-------|-------|-------|-------|-------|-------|-----|------|-------|-------|
| A009233_01 | At3g43120     | indole-3-acetic acid induced p   | 0 | -0.20 | 0.18  | 0.64  | 0.80  | 0.81  | 1.28  | 0.9 | 0.31 | -1.58 | -1.57 |
| A009255_01 | At3g22240     | expressed protein; protein id:   | 0 | -1.11 | -0.96 | -0.69 | -0.18 | -0.25 | -0.27 | 1.0 | 0.14 | 0.50  | -2.61 |
| A009256_01 | At3g04840     | putative 40S ribosomal protei    | 0 | -0.88 | -1.11 | -1.13 | -1.87 | -1.90 | -1.80 | 0.9 | 0.26 | 2.75  | 0.13  |
| A009305_01 | At3g22750     | expressed protein; protein id:   | 0 | 1.49  | 1.16  | 1.14  | 0.72  | 1.42  | 1.24  | 0.9 | 0.41 | -1.32 | 1.12  |
| A009307_01 | At3g53890     | 40S ribosomal protein S21 hc     | 0 | -1.04 | -1.32 | -1.28 | -1.75 | -1.82 | -1.74 | 1.4 | 0.06 | 2.80  | -0.31 |
| A009325_01 | At3g29320     | glucan phosphorylase, putativ    | 0 | -1.53 | -1.80 | -1.81 | -1.62 | -1.97 | -2.92 | 0.8 | 0.66 | 2.63  | -0.58 |
| A009328_01 | At3g56880     | putative protein; protein id: At | 0 | 1.66  | 1.52  | 1.10  | 0.74  | 0.43  | 0.97  | 0.8 | 0.81 | -0.38 | 2.05  |
| A009340_01 | At3g18760     | expressed protein; protein id:   | 0 | -1.46 | -1.59 | -1.50 | -1.81 | -2.14 | -2.07 | 1.1 | 0.14 | 2.76  | -0.58 |
| A009368_01 | At3g51420     | strictosidine synthase-related   | 0 | 0.74  | 1.03  | 1.06  | 1.33  | 1.42  | 1.18  | 1.6 | 0.06 | -1.99 | -0.04 |
| A009369_01 | At3g46210     | putative protein; protein id: At | 0 | -0.22 | -0.82 | -0.67 | -1.08 | -0.83 | -1.28 | 0.8 | 0.55 | 2.63  | 0.22  |
| A009378_01 | At3g27820     | monodehydroascorbate reduc       | 0 | 1.02  | 1.19  | 1.23  | 1.27  | 1.38  | 1.59  | 1.2 | 0.06 | -2.02 | 0.24  |
| A009409_01 | At3g15050     | hypothetical protein; protein ic | 0 | 0.09  | 0.63  | 0.91  | 1.68  | 1.57  | 1.31  | 0.9 | 0.41 | -1.74 | -1.18 |
| A009413_01 | At3g12880     | hypothetical protein; protein ic | 0 | -0.78 | -1.58 | -1.88 | -0.95 | -0.88 | -1.33 | 0.9 | 0.31 | 1.98  | -1.28 |
| A009426_01 | xxxx          | b/t pseudogene, cytochrome l     | 0 | 0.08  | 0.53  | 0.79  | 1.40  | 1.10  | 0.70  | 0.8 | 0.55 | -1.47 | -0.79 |
| A009434_01 | At3g57720     | protein kinase - like protein; p | 0 | 1.83  | 1.80  | 1.45  | 1.26  | 1.19  | 1.04  | 1.1 | 0.06 | -0.93 | 1.84  |
| A009480_01 | At3g18560     | expressed protein; protein id:   | 0 | -0.57 | -0.67 | -0.70 | -1.11 | -1.22 | -1.05 | 0.7 | 1.20 | 2.74  | 0.06  |
| A009491_01 | At3g30370     | hypothetical protein; protein ic | 0 | -0.51 | -0.81 | -0.56 | -0.67 | -1.35 | -1.27 | 0.7 | 1.20 | 2.55  | 0.10  |
| A009495_01 | At3g21640     | peptidylprolyl isomerase, puta   | 0 | -0.32 | -0.58 | -0.63 | -0.62 | -0.69 | -1.10 | 0.6 | 4.47 | 2.65  | 0.03  |
| A009501_01 | At3g48740     | MTN3-like protein; protein id:   | 0 | 1.03  | 2.33  | 3.27  | 3.63  | 3.63  | 3.93  | 2.4 | 0.06 | -1.96 | -0.66 |
| A009506_01 | At3g43230     | putative protein; protein id: At | 0 | 0.87  | 0.91  | 0.95  | 1.16  | 1.20  | 1.65  | 0.9 | 0.41 | -1.98 | -0.15 |
| A009507_01 | At3g19553     | amino acid permease, putativ     | 0 | 1.19  | 1.47  | 2.09  | 1.98  | 2.27  | 2.18  | 0.7 | 1.61 | -2.00 | -0.15 |
| A009515_01 | At3g05400     | sugar transporter, putative; pr  | 0 | -0.08 | 0.40  | 1.82  | 2.05  | 2.55  | 3.89  | 1.4 | 0.06 | -1.55 | -1.55 |
| A009517_01 | At3g51670     | putative protein; protein id: At | 0 | -0.65 | -0.56 | -0.57 | -1.00 | -1.08 | -1.13 | 0.9 | 0.37 | 2.55  | 0.12  |
| A009525_01 | At3g53420     | plasma membrane intrinsic pr     | 0 | 1.33  | 1.52  | 1.71  | 1.24  | 0.84  | 1.31  | 0.6 | 2.21 | -1.23 | 1.40  |
| A009530_01 | At3g21550     | expressed protein; protein id:   | 0 | 1.35  | 0.64  | 0.51  | 0.60  | -0.20 | 0.31  | 1.1 | 0.14 | 0.42  | 1.89  |
| A009543_01 | At3g16080     | putative ribosomal protein; pr   | 0 | -1.06 | -1.17 | -1.16 | -1.71 | -1.72 | -1.75 | 1.4 | 0.06 | 2.79  | -0.23 |
| A009551_01 | At3g45780     | nonphototropic hypocotyl 1; p    | 0 | 1.11  | 1.04  | 1.13  | 1.20  | 0.95  | 1.16  | 1.2 | 0.06 | -1.73 | 0.94  |
| A009566_01 | At3g55360     | synaptic glycoprotein SC2-like   | 0 | -0.56 | -0.72 | -0.74 | -1.02 | -1.21 | -1.45 | 1.0 | 0.16 | 2.73  | 0.22  |
| A009568_01 | At3g15640     | putative cytochrome c oxidase    | 0 | -0.45 | -0.92 | -0.94 | -1.57 | -1.56 | -1.25 | 1.0 | 0.20 | 2.66  | 0.23  |
| A009583_01 | At3g47250     | putative protein; protein id: At | 0 | 1.24  | 1.74  | 2.03  | 2.38  | 2.62  | 2.55  | 1.7 | 0.06 | -2.06 | -0.32 |
| A009590_01 | At3g06550     | unknown protein; protein id: A   | 0 | -0.10 | 0.15  | -0.05 | -0.39 | -1.07 | -0.97 | 1.0 | 0.16 | 1.89  | 1.18  |
| A009618_01 | At3g10610     | putative 40S ribosomal protei    | 0 | -1.47 | -1.86 | -1.71 | -2.72 | -2.49 | -2.46 | 0.8 | 0.55 | 2.77  | -0.27 |
| A009665_01 | At3g01250     | hypothetical protein; protein ic | 0 | 0.44  | 0.63  | 0.95  | 1.00  | 0.90  | 1.20  | 0.8 | 0.96 | -1.96 | -0.43 |
| A009676_01 | At3g07590     | putative small nuclear ribonuc   | 0 | -0.76 | -1.05 | -0.91 | -1.26 | -1.17 | -1.18 | 0.8 | 0.81 | 2.76  | -0.59 |
| A009738_01 | At3g46930     | protein kinase 6-like protein; p | 0 | 0.76  | 1.08  | 1.23  | 1.47  | 1.26  | 1.73  | 1.6 | 0.06 | -2.02 | -0.21 |
| A009740_01 | At3g57390     | MADS-box protein; protein id:    | 0 | 0.77  | 0.60  | 0.88  | 0.93  | 1.08  | 1.42  | 1.0 | 0.20 | -1.90 | -0.35 |
| A009744_01 | At3g07460     | expressed protein; protein id:   | 0 | -0.07 | -0.12 | -0.37 | -0.83 | -1.08 | -1.00 | 0.9 | 0.26 | 2.33  | 1.14  |
| A009753_01 | At3g23830     | A.t. reversibly glycosylated pc  | 0 | -1.58 | -2.09 | -1.60 | -1.63 | -2.62 | -2.75 | 0.9 | 0.31 | 2.67  | -0.56 |
| A009765_01 | At3g24190     | expressed protein; protein id:   | 0 | 0.57  | 0.92  | 0.99  | 1.08  | 1.17  | 1.35  | 1.2 | 0.06 | -2.04 | -0.22 |
| A009777_01 | At3g18290     | zinc finger protein, putative; p | 0 | 0.74  | 1.05  | 0.97  | 0.88  | 0.73  | 1.18  | 1.0 | 0.18 | -1.71 | 0.73  |
| A009780_01 | At3g01520     | expressed protein; protein id:   | 0 | 1.00  | 1.03  | 1.12  | 1.14  | 0.99  | 0.81  | 0.6 | 4.47 | -1.54 | 1.07  |
| A009803_01 | At3g03480     | putative hypersensitivity-relate | 0 | 1.12  | 1.48  | 1.41  | 1.98  | 1.93  | 1.45  | 1.3 | 0.06 | -1.89 | 0.13  |
| A009836_01 | At3g01970     | WRKY family transcription fac    | 0 | 1.44  | 2.09  | 2.31  | 2.65  | 3.16  | 3.24  | 0.7 | 2.21 | -2.05 | -0.41 |
| A009845_01 | not annotated | Chr3 C/9929563-9929632           | 0 | -0.43 | 0.15  | 0.59  | 0.82  | 1.04  | 1.29  | 1.1 | 0.10 | -1.48 | -1.76 |

|            |           |                                  |   |       |       |       |       |       |       |     |      |       |       |
|------------|-----------|----------------------------------|---|-------|-------|-------|-------|-------|-------|-----|------|-------|-------|
| A009848_01 | At3g02140 | expressed protein; protein id:   | 0 | 2.00  | 2.27  | 2.21  | 2.05  | 1.86  | 2.32  | 1.7 | 0.06 | -1.73 | 1.00  |
| A009867_01 | At3g61460 | RING finger protein; protein ic  | 0 | 0.56  | 0.78  | 0.84  | 0.75  | 0.40  | 0.19  | 0.8 | 0.66 | -0.53 | 1.32  |
| A009879_01 | At3g10090 | putative ribosomal protein S2    | 0 | -0.74 | -0.82 | -0.73 | -1.13 | -1.21 | -0.95 | 0.9 | 0.27 | 2.70  | -0.48 |
| A009890_01 | At3g30775 | hypothetical protein; protein ic | 0 | 1.32  | 1.09  | 0.52  | -0.31 | -0.55 | -0.21 | 1.0 | 0.20 | 1.14  | 2.08  |
| A009906_01 | At3g06420 | AtAPG8h; expressed protein;      | 0 | 2.07  | 2.10  | 1.61  | 1.74  | 1.58  | 2.05  | 1.1 | 0.14 | -1.54 | 1.24  |
| A009911_01 | At3g15000 | expressed protein; protein id:   | 0 | -1.45 | -1.24 | -1.06 | -1.41 | -1.25 | -1.44 | 0.8 | 0.48 | 2.42  | -1.22 |
| A009949_01 | At3g54640 | tryptophan synthase alpha ch     | 0 | -1.35 | -1.15 | -1.04 | -0.74 | -0.70 | -0.79 | 0.6 | 4.47 | 1.54  | -2.34 |
| A009988_01 | At3g02810 | putative protein kinase; protei  | 0 | -0.20 | 0.18  | 0.54  | 0.69  | 0.45  | 1.14  | 0.7 | 1.20 | -1.46 | -1.43 |
| A009989_01 | At3g02800 | unknown protein; protein id: A   | 0 | 0.46  | 0.61  | 0.90  | 1.13  | 1.07  | 1.53  | 0.9 | 0.41 | -1.94 | -0.80 |
| A010048_01 | At3g56620 | nodulin-like protein; protein id | 0 | 0.46  | -0.63 | -1.15 | -0.90 | -0.96 | NA    | 0.7 | 1.20 | NA    | NA    |
| A010051_01 | At3g62110 | polygalacturonase, putative; p   | 0 | -1.50 | -1.72 | -1.63 | -1.68 | -1.93 | -2.03 | 1.2 | 0.06 | 2.70  | -0.91 |
| A010065_01 | At3g14610 | cytochrome P450, putative; p     | 0 | 1.26  | 0.48  | 0.11  | -0.37 | 0.09  | -0.30 | 1.0 | 0.18 | 1.13  | 1.72  |
| A010173_01 | At3g56010 | putative protein; protein id: At | 0 | 0.41  | 0.66  | 0.85  | 1.07  | 0.83  | 0.81  | 0.9 | 0.41 | -1.87 | -0.16 |
| A010227_01 | At3g12630 | expressed protein; protein id:   | 0 | 0.70  | 0.59  | 0.66  | 0.65  | 0.59  | 1.01  | 0.8 | 0.81 | -1.75 | 0.48  |
| A010276_01 | At3g54500 | putative protein; protein id: At | 0 | 1.00  | 1.16  | 1.05  | 1.27  | 0.88  | 1.76  | 0.8 | 0.81 | -1.78 | 0.38  |
| A010296_01 | At3g19400 | cysteine proteinase; protein ic  | 0 | -0.75 | -0.96 | -1.11 | -1.15 | -1.45 | -1.50 | 0.9 | 0.31 | 2.80  | -0.15 |
| A010300_01 | At3g47930 | L-galactono-1,4-lactone dehy     | 0 | -0.84 | -0.89 | -1.13 | -1.20 | -1.39 | -1.32 | 0.7 | 2.21 | 2.79  | -0.31 |
| A010307_01 | At3g26165 | pseudogene, cytochrome P45       | 0 | 2.18  | 2.35  | 2.30  | 2.36  | 2.11  | 2.34  | 1.2 | 0.06 | -1.78 | 0.94  |
| A010313_01 | At3g15351 | expressed protein; protein id:   | 0 | 0.72  | 0.67  | 0.60  | 0.78  | 1.02  | 1.23  | 0.8 | 0.96 | -1.84 | -0.19 |
| A010318_01 | At3g51730 | putative protein; protein id: At | 0 | 2.12  | 1.94  | 1.84  | 1.96  | 2.07  | 2.26  | 1.0 | 0.16 | -1.79 | 0.82  |
| A010320_01 | At3g12390 | nascent polypeptide associat     | 0 | -0.84 | -1.29 | -1.29 | -1.71 | -1.71 | -1.97 | 1.3 | 0.06 | 2.81  | -0.05 |
| A010323_01 | At3g52480 | putative protein; protein id: At | 0 | 1.33  | 1.47  | 1.63  | 2.17  | 1.96  | 1.50  | 1.2 | 0.06 | -1.84 | 0.24  |
| A010348_01 | At3g52620 | hypothetical protein; protein ic | 0 | 0.82  | 1.11  | 1.56  | 1.59  | 1.43  | 2.01  | 0.8 | 0.55 | -2.00 | -0.31 |
| A010365_01 | At3g06700 | ribosomal protein L29, putativ   | 0 | -0.68 | -0.73 | -0.80 | -1.32 | -1.43 | -1.42 | 1.0 | 0.18 | 2.73  | 0.22  |
| A010369_01 | At3g44890 | RP19 gene for chloroplast rib    | 0 | -0.59 | -0.98 | -1.03 | -1.20 | -1.12 | -1.42 | 0.8 | 0.66 | 2.78  | -0.21 |
| A010378_01 | At3g12145 | pseudogene, polygalacturona      | 0 | -2.48 | -3.23 | -2.42 | -4.28 | -3.73 | -3.11 | 1.2 | 0.06 | 2.62  | -0.69 |
| A010383_01 | At3g45010 | carboxypeptidase precursor-li    | 0 | 1.91  | 2.10  | 1.89  | 1.78  | 1.86  | 2.43  | 1.0 | 0.20 | -1.79 | 0.83  |
| A010390_01 | At3g15770 | hypothetical protein; protein ic | 0 | 1.18  | 1.15  | 0.87  | 0.79  | 0.74  | 1.00  | 0.6 | 4.47 | -1.22 | 1.61  |
| A010393_01 | At3g54400 | nucleoid DNA-binding - like pi   | 0 | -1.32 | -2.24 | -2.42 | -3.09 | -3.28 | -3.00 | 1.3 | 0.06 | 2.76  | -0.05 |
| A010400_01 | At3g56310 | glycosyl hydrolase family 27 (   | 0 | 0.73  | 0.86  | 0.84  | 0.97  | 1.46  | 1.37  | 1.0 | 0.16 | -1.99 | -0.30 |
| A010404_01 | At3g04980 | hypothetical protein, contains   | 0 | -0.50 | -0.76 | -0.80 | -0.68 | -0.82 | -1.20 | 0.7 | 1.61 | 2.67  | -0.34 |
| A010413_01 | At3g11590 | expressed protein; protein id:   | 0 | -0.38 | -0.49 | -0.59 | -0.91 | -1.17 | NA    | 0.8 | 0.48 | NA    | NA    |
| A010414_01 | At3g01240 | hypothetical protein; protein ic | 0 | 0.33  | 0.69  | 1.07  | 1.19  | 1.02  | 1.55  | 0.8 | 0.66 | -1.92 | -0.79 |
| A010433_01 | At3g05090 | expressed protein; protein id:   | 0 | 0.80  | 0.94  | 0.96  | 0.79  | 0.63  | 1.11  | 0.8 | 0.81 | -1.61 | 0.93  |
| A010441_01 | At3g09000 | expressed protein; protein id:   | 0 | -0.66 | -0.66 | -0.72 | -1.11 | -0.88 | -1.41 | 0.6 | 4.47 | 2.68  | -0.07 |
| A010460_01 | At3g15590 | DNA-binding protein, putative    | 0 | -0.66 | -1.04 | -0.89 | -1.02 | -0.91 | -1.18 | 0.9 | 0.37 | 2.70  | -0.77 |
| A010467_01 | At3g19790 | hypothetical protein; protein ic | 0 | -0.77 | -0.91 | -0.88 | -1.15 | -1.03 | -1.05 | 0.9 | 0.41 | 2.73  | -0.69 |
| A010495_01 | At3g04700 | hypothetical protein; protein ic | 0 | 0.24  | 0.54  | 0.83  | 0.74  | 0.96  | 1.39  | 0.8 | 0.81 | -1.84 | -0.88 |
| A010506_01 | At3g54920 | pectate lyase - like protein; pr | 0 | -0.34 | -0.66 | -1.18 | -1.30 | -1.55 | -1.88 | 0.6 | 4.47 | 2.65  | 0.63  |
| A010517_01 | At3g06320 | putative 50S ribosomal protei    | 0 | -1.77 | -2.21 | -1.90 | -2.26 | -2.41 | -2.42 | 1.2 | 0.06 | 2.73  | -0.86 |
| A010518_01 | At3g50770 | calmodulin-like protein; protei  | 0 | 1.28  | 0.83  | 1.05  | 0.69  | 2.08  | 2.73  | 1.1 | 0.14 | -1.46 | -0.50 |
| A010526_01 | At3g55005 | expressed protein; protein id:   | 0 | -0.36 | -0.67 | -0.84 | -0.75 | -0.97 | -1.25 | 1.1 | 0.10 | 2.68  | 0.09  |
| A010527_01 | At3g56170 | putative protein; protein id: At | 0 | 1.17  | 1.49  | 1.69  | 2.35  | 2.13  | 1.81  | 1.1 | 0.10 | -1.94 | -0.11 |
| A010535_01 | At3g23170 | expressed protein; protein id:   | 0 | 0.51  | 0.77  | 0.91  | 1.15  | 0.88  | 1.17  | 1.1 | 0.14 | -1.99 | -0.24 |

|            |           |                                   |   |       |       |       |       |       |       |     |      |       |       |
|------------|-----------|-----------------------------------|---|-------|-------|-------|-------|-------|-------|-----|------|-------|-------|
| A010541_01 | At3g17070 | peroxidase, putative; protein i   | 0 | -1.39 | -1.01 | -0.84 | -0.27 | -0.36 | -0.29 | 0.6 | 2.21 | 0.52  | -2.60 |
| A010548_01 | xxxx      | b/t glycosyl transferase, putat   | 0 | -0.36 | -0.81 | -0.87 | -1.11 | -1.37 | -1.44 | 0.9 | 0.48 | 2.73  | 0.38  |
| A010555_01 | At3g03470 | cytochrome p450, putative; pi     | 0 | 1.80  | 2.48  | 2.83  | 3.13  | 3.37  | 3.52  | 2.3 | 0.06 | -2.07 | -0.18 |
| A010559_01 | At3g56490 | protein kinase C inhibitor-like   | 0 | -0.97 | -0.83 | -0.86 | -1.21 | -1.16 | -1.05 | 0.9 | 0.31 | 2.64  | -0.76 |
| A010579_01 | At3g54880 | putative protein; protein id: At  | 0 | 1.26  | 0.93  | 0.81  | 0.66  | 0.54  | 0.13  | 0.9 | 0.27 | -0.03 | 2.03  |
| A010599_01 | At3g02080 | putative 40S ribosomal protei     | 0 | 0.09  | -0.59 | -0.65 | -1.23 | -1.42 | -1.36 | 0.8 | 0.66 | 2.48  | 0.97  |
| A010617_01 | At3g05160 | putative sugar transporter; pr    | 0 | 1.47  | 1.54  | 1.73  | 2.01  | 1.97  | 1.96  | 1.9 | 0.06 | -2.00 | 0.26  |
| A010619_01 | At3g26510 | unknown protein; protein id: A    | 0 | 1.62  | 2.06  | 2.44  | 2.44  | 2.49  | 3.00  | 1.1 | 0.10 | -2.04 | 0.03  |
| A010626_01 | At3g18280 | lipid transfer protein, putative; | 0 | -0.26 | -0.39 | -0.68 | -0.79 | -1.02 | -0.94 | 0.8 | 0.48 | 2.66  | 0.53  |
| A010628_01 | At3g62840 | small nuclear ribonucleoprote     | 0 | -0.57 | -0.67 | -0.56 | -0.79 | -0.96 | -1.06 | 0.8 | 0.81 | 2.79  | -0.24 |
| A010629_01 | At3g23990 | mitochondrial chaperonin hsp      | 0 | -1.10 | -1.03 | -0.93 | -1.41 | -1.36 | -1.57 | 1.0 | 0.14 | 2.71  | -0.50 |
| A010648_01 | At3g22890 | ATP sulfurylase, putative; pro    | 0 | 0.63  | 0.89  | 1.19  | 1.52  | 1.56  | 2.67  | 0.8 | 0.55 | -1.83 | -0.84 |
| A010660_01 | At3g20670 | histone H2A, putative; protein    | 0 | -1.47 | -1.70 | -1.35 | -1.87 | -2.13 | -2.13 | 1.4 | 0.06 | 2.77  | -0.65 |
| A010669_01 | At3g19550 | expressed protein; protein id:    | 0 | 0.32  | 0.79  | 1.42  | 2.07  | 2.01  | 2.09  | 1.0 | 0.14 | -1.85 | -1.16 |
| A010676_01 | At3g57450 | putative protein; protein id: At  | 0 | 0.28  | 1.01  | 0.72  | 0.13  | -0.24 | 0.10  | 1.1 | 0.10 | 0.38  | 1.47  |
| A010677_01 | At3g01100 | unknown protein; protein id: A    | 0 | 0.72  | 0.95  | 1.21  | 1.27  | 1.37  | 1.51  | 1.0 | 0.18 | -2.07 | -0.29 |
| A010679_01 | At3g57560 | acetylglutamate kinase-like pi    | 0 | -0.78 | -0.94 | -0.99 | -1.29 | -1.36 | -1.57 | 0.9 | 0.37 | 2.81  | -0.12 |
| A010689_01 | At3g49670 | leucine-rich repeat transmem      | 0 | -1.19 | -1.05 | -0.79 | -0.92 | -1.86 | -1.73 | 0.7 | 2.21 | 2.45  | -0.34 |
| A010690_01 | At3g04240 | putative O-linked GlcNAc trar     | 0 | 0.56  | 0.67  | 0.76  | 0.89  | 0.90  | 1.17  | 0.8 | 0.81 | -2.04 | -0.22 |
| A010693_01 | At3g44880 | lethal leaf-spot 1 homolog Lls    | 0 | 0.65  | 1.02  | 0.96  | 1.12  | 1.41  | 1.50  | 1.3 | 0.06 | -2.04 | -0.32 |
| A010696_01 | At3g04520 | L-allo-threonine aldolase, puti   | 0 | 0.66  | 0.67  | 0.57  | 0.81  | 0.89  | 1.19  | 0.8 | 0.66 | -1.83 | -0.21 |
| A010701_01 | At3g16040 | expressed protein; protein id:    | 0 | -0.45 | 0.19  | 0.70  | 1.00  | 1.16  | 1.48  | 0.6 | 4.47 | -1.50 | -1.74 |
| A010704_01 | At3g04350 | expressed protein; protein id:    | 0 | 0.73  | 0.78  | 1.04  | 1.06  | 1.26  | 1.41  | 0.8 | 0.66 | -2.04 | -0.29 |
| A010708_01 | At3g57800 | putative protein; protein id: At  | 0 | 0.24  | -0.22 | -0.75 | -1.15 | -1.01 | -1.45 | 0.6 | 2.21 | 2.34  | 1.17  |
| A010709_01 | At3g56120 | putative protein; protein id: At  | 0 | -0.59 | -0.69 | -0.79 | -1.04 | -1.04 | -1.05 | 1.2 | 0.06 | 2.80  | -0.16 |
| A010731_01 | At3g27690 | light harvesting chlorophyll A/   | 0 | 1.05  | 0.25  | -0.34 | -1.16 | -1.53 | -1.94 | 0.7 | 2.21 | 1.98  | 1.62  |
| A010733_01 | At3g27740 | carbamoyl phosphate synthet       | 0 | -0.86 | -1.38 | -1.23 | -1.91 | -2.20 | -2.09 | 1.1 | 0.14 | 2.78  | 0.13  |
| A010744_01 | At3g62360 | putative protein; protein id: At  | 0 | -1.10 | -0.68 | -0.90 | -0.80 | -0.82 | -0.87 | 0.6 | 2.21 | 2.15  | -1.41 |
| A010750_01 | At3g49220 | pectinesterase - like protein; p  | 0 | -1.04 | -1.15 | -1.27 | -1.59 | -1.95 | -1.97 | 1.1 | 0.10 | 2.79  | -0.05 |
| A010790_01 | At3g10520 | class 2 non-symbiotic hemogl      | 0 | 0.17  | 0.83  | 1.16  | 1.67  | 1.39  | 0.66  | 2.1 | 0.06 | -1.42 | -0.58 |
| A010805_01 | At3g03870 | expressed protein; protein id:    | 0 | 1.82  | 1.78  | 1.91  | 1.73  | 1.91  | 2.45  | 1.3 | 0.06 | -1.88 | 0.57  |
| A010822_01 | At3g13810 | zinc finger protein, putative; p  | 0 | 0.06  | 0.50  | 0.77  | 0.83  | 1.11  | 1.11  | 1.2 | 0.06 | -1.82 | -1.14 |
| A010851_01 | At3g09920 | putative phosphatidylinositol-    | 0 | 0.86  | 0.99  | 0.78  | 0.90  | 0.87  | 0.97  | 0.9 | 0.41 | -1.75 | 0.96  |
| A010863_01 | At3g21420 | expressed protein; protein id:    | 0 | 1.33  | 0.83  | 0.41  | 0.19  | 0.13  | 0.62  | 0.6 | 4.47 | 0.20  | 1.72  |
| A010874_01 | At3g10525 | expressed protein; protein id:    | 0 | 1.18  | 1.65  | 1.81  | 1.96  | 1.80  | 1.67  | 1.3 | 0.06 | -1.91 | 0.33  |
| A010879_01 | At3g58660 | putative protein; protein id: At  | 0 | -0.82 | -1.07 | -0.95 | -1.65 | -1.74 | NA    | 0.7 | 2.21 | NA    | NA    |
| A010898_01 | At3g53620 | inorganic pyrophosphatase -li     | 0 | 0.43  | -0.17 | -0.63 | -0.07 | -1.23 | -0.91 | 0.8 | 0.55 | 1.88  | 1.12  |
| A010902_01 | At3g57330 | potential calcium-transporting    | 0 | 0.31  | 1.01  | 1.19  | 1.42  | 1.33  | 1.76  | 1.4 | 0.06 | -1.93 | -0.73 |
| A010926_01 | At3g61310 | putative DNA-binding protein;     | 0 | -0.81 | -0.86 | -1.15 | -1.03 | -0.97 | -1.07 | 0.7 | 2.21 | 2.67  | -0.89 |
| A010943_01 | At3g52960 | peroxiredoxin - like protein; pi  | 0 | -0.95 | -0.85 | -0.81 | -1.19 | -0.93 | -1.38 | 0.7 | 2.21 | 2.62  | -0.63 |
| A010949_01 | At3g61900 | putative protein; protein id: At  | 0 | 0.35  | 0.95  | 1.93  | 2.47  | 2.70  | 3.05  | 1.0 | 0.16 | -1.83 | -1.27 |
| A010961_01 | At3g59140 | ABC transporter family protei     | 0 | -0.67 | 0.09  | 0.68  | 0.94  | 0.88  | 1.74  | 0.9 | 0.41 | -1.35 | -1.76 |
| A010964_01 | At3g56290 | putative protein; protein id: At  | 0 | 0.93  | 1.42  | 1.61  | 1.51  | 1.60  | 2.08  | 0.9 | 0.27 | -2.00 | -0.05 |
| A011007_01 | At3g11930 | ethylene-responsive protein, p    | 0 | 1.45  | 2.37  | 2.47  | 2.51  | 2.34  | 3.04  | 1.7 | 0.06 | -1.97 | 0.12  |

|            |           |                                    |   |       |       |       |       |       |       |     |      |       |       |
|------------|-----------|------------------------------------|---|-------|-------|-------|-------|-------|-------|-----|------|-------|-------|
| A011019_01 | At3g20530 | protein kinase, putative; prote    | 0 | 0.41  | 0.68  | 1.03  | 1.07  | 1.09  | 1.51  | 0.7 | 1.20 | -1.96 | -0.71 |
| A011029_01 | At3g19895 | unknown protein; protein id: A     | 0 | 0.65  | 0.84  | 1.07  | 1.74  | 1.52  | 1.77  | 0.9 | 0.48 | -1.98 | -0.73 |
| A011033_01 | At3g15580 | AtAPG8i; expressed protein; j      | 0 | 0.83  | 1.09  | 1.13  | 1.33  | 1.22  | 1.53  | 1.5 | 0.06 | -2.04 | 0.00  |
| A011038_01 | At3g22530 | expressed protein; protein id:     | 0 | 0.16  | 0.38  | 0.54  | 0.64  | 0.83  | 1.04  | 1.0 | 0.20 | -1.87 | -1.07 |
| A011090_01 | At3g27390 | unknown protein; protein id: A     | 0 | 0.80  | 0.95  | 1.05  | 0.84  | 1.53  | 1.25  | 0.7 | 2.21 | -1.84 | 0.04  |
| A011094_01 | At3g21790 | putative UDP-glucose glucosyl      | 0 | 1.44  | 1.56  | 1.65  | 1.62  | 1.71  | 2.28  | 0.9 | 0.31 | -1.96 | 0.30  |
| A011109_01 | At3g28750 | unknown protein; protein id: A     | 0 | 0.44  | 0.76  | 1.17  | 1.12  | 0.97  | 1.85  | 1.0 | 0.20 | -1.81 | -0.60 |
| A011121_01 | At3g48500 | hypothetical protein; protein ic   | 0 | -0.94 | -0.82 | -0.67 | -0.54 | -0.64 | -1.03 | 0.8 | 0.96 | 2.13  | -1.57 |
| A011130_01 | At3g14280 | unknown protein; protein id: A     | 0 | 2.45  | 2.75  | 2.86  | 3.08  | 2.87  | 3.03  | 1.6 | 0.06 | -1.92 | 0.60  |
| A011146_01 | At3g49570 | hypothetical protein; protein ic   | 0 | -0.74 | 0.18  | 1.91  | 1.83  | 2.29  | 4.28  | 1.1 | 0.14 | -1.39 | -1.68 |
| A011148_01 | At3g04770 | putative 40S ribosomal protei      | 0 | -0.99 | -1.01 | -0.88 | -1.34 | -1.38 | -1.44 | 0.8 | 0.81 | 2.76  | -0.45 |
| A011190_01 | At3g55290 | oxidoreductase-like protein; p     | 0 | 0.33  | 0.38  | -0.01 | -0.83 | -1.02 | -1.10 | 1.3 | 0.06 | 1.94  | 1.58  |
| A011193_01 | At3g22060 | receptor kinase common fam         | 0 | 2.22  | 2.65  | 2.02  | 1.66  | 0.92  | 0.38  | 1.6 | 0.06 | -0.14 | 1.95  |
| A011198_01 | At3g60140 | glycosyl hydrolase family 1, b     | 0 | 2.44  | 2.79  | 3.13  | 2.40  | 2.40  | 4.74  | 1.2 | 0.06 | -1.70 | 0.21  |
| A011200_01 | At3g60180 | uridylylate kinase-like protein; p | 0 | 0.86  | 0.98  | 0.89  | 1.05  | 0.91  | 0.96  | 0.7 | 0.96 | -1.84 | 0.76  |
| A011228_01 | At3g60520 | putative protein; protein id: At   | 0 | -0.44 | -1.29 | -0.62 | -0.27 | -0.19 | -0.37 | 0.7 | 1.61 | 0.91  | -1.93 |
| A011267_01 | At3g22420 | putative protein kinase; protei    | 0 | 0.29  | -0.21 | -0.44 | -0.79 | -0.83 | -1.03 | 1.3 | 0.06 | 2.31  | 1.23  |
| A011274_01 | At3g17590 | expressed protein; protein id:     | 0 | 0.35  | -0.79 | -0.79 | -0.86 | -0.73 | -1.06 | 1.4 | 0.06 | 2.09  | 0.38  |
| A011285_01 | At3g53960 | transporter-like protein; protei   | 0 | 0.89  | 1.57  | 1.95  | 2.13  | 2.33  | 2.68  | 0.6 | 4.47 | -2.02 | -0.53 |
| A011304_01 | At3g21110 | phosphoribosyamidoimidazol         | 0 | -0.50 | -0.82 | -0.82 | -1.10 | -1.05 | -1.09 | 1.3 | 0.06 | 2.78  | -0.18 |
| A011307_01 | At3g59210 | putative protein; protein id: At   | 0 | 1.59  | 1.33  | 0.99  | 0.79  | 0.86  | 1.37  | 0.6 | 4.47 | -1.02 | 1.47  |
| A011311_01 | At3g10230 | lycopene beta cyclase; protei      | 0 | 0.56  | 0.82  | 0.93  | 0.98  | 0.91  | 1.11  | 0.8 | 0.48 | -1.99 | 0.05  |
| A011320_01 | At3g17150 | hypothetical protein; protein ic   | 0 | 0.01  | -1.69 | -3.06 | NA    | -2.71 | -3.06 | 1.0 | 0.14 | NA    | NA    |
| A011331_01 | At3g48180 | hypothetical protein; protein ic   | 0 | 0.02  | -0.04 | 0.27  | 0.58  | 0.85  | 1.18  | 1.0 | 0.16 | -1.33 | -1.63 |
| A011342_01 | At3g05060 | putative SAR DNA-binding pr        | 0 | -0.86 | -1.06 | -1.04 | -1.75 | -1.25 | -1.81 | 1.0 | 0.26 | 2.68  | -0.10 |
| A011344_01 | At3g09820 | putative adenosine kinase; pr      | 0 | -1.26 | -1.55 | -1.55 | -1.25 | -1.70 | -2.33 | 0.9 | 0.41 | 2.63  | -0.59 |
| A011359_01 | At3g57510 | polygalacturonase, putative; p     | 0 | 0.98  | 2.44  | 3.89  | 4.49  | 4.92  | 5.82  | 3.8 | 0.06 | -1.92 | -1.02 |
| A011372_01 | At3g52750 | plastid division protein FtsZ-lil  | 0 | -0.97 | -1.26 | -1.43 | -1.72 | -1.50 | NA    | 0.9 | 0.48 | NA    | NA    |
| A011390_01 | At3g06530 | hypothetical protein; protein ic   | 0 | -1.19 | -1.04 | -0.63 | -1.38 | -1.12 | -1.03 | 0.8 | 0.66 | 2.30  | -1.08 |
| A011396_01 | At3g08740 | putative elongation factor P (E    | 0 | -0.60 | -1.07 | -1.19 | -1.15 | -1.31 | -1.67 | 0.7 | 1.20 | 2.75  | -0.12 |
| A011407_01 | At3g01230 | hypothetical protein; protein ic   | 0 | 0.66  | 0.94  | 1.57  | 1.53  | 1.47  | 2.13  | 0.8 | 0.55 | -1.90 | -0.55 |
| A011419_01 | At3g05180 | putative nodulin; protein id: At   | 0 | -0.58 | -1.12 | -1.44 | -1.08 | -0.87 | -1.33 | 0.9 | 0.48 | 2.29  | -0.74 |
| A011428_01 | At3g09030 | hypothetical protein; protein ic   | 0 | 0.91  | 0.98  | 1.17  | 1.46  | 1.33  | 1.22  | 1.0 | 0.16 | -1.97 | 0.12  |
| A011429_01 | At3g20250 | pumilio-family RNA-binding pi      | 0 | 1.37  | 1.24  | 1.23  | 1.14  | 1.04  | 1.64  | 0.8 | 0.96 | -1.65 | 0.90  |
| A011436_01 | At3g09190 | MZB10.23; pseudogene, lecti        | 0 | -1.04 | -1.52 | -1.03 | -0.07 | 0.17  | -0.11 | 0.7 | 2.21 | 0.17  | -2.44 |
| A011441_01 | At3g10250 | expressed protein; protein id:     | 0 | 0.77  | 0.65  | 0.99  | 1.30  | 1.38  | 1.56  | 0.7 | 0.96 | -1.97 | -0.60 |
| A011462_01 | At3g04630 | expressed protein; protein id:     | 0 | -0.79 | -0.92 | -0.77 | -1.11 | -0.83 | NA    | 0.8 | 0.48 | NA    | NA    |
| A011479_01 | At3g03980 | putative short-chain type dehy     | 0 | -0.42 | -0.52 | -0.68 | -0.84 | -0.88 | -1.28 | 0.8 | 0.81 | 2.70  | 0.25  |
| A011505_01 | At3g52840 | glycosyl hydrolase family 35 (     | 0 | 1.16  | 0.66  | 0.47  | 0.38  | 0.19  | -0.03 | 1.2 | 0.06 | 0.53  | 2.09  |
| A011512_01 | At3g57570 | hypothetical protein; protein ic   | 0 | 0.21  | 0.32  | 0.49  | 0.57  | 0.65  | 1.00  | 0.7 | 1.61 | -1.83 | -0.97 |
| A011523_01 | At3g07200 | putative RING zinc finger prot     | 0 | -1.05 | -1.89 | -1.29 | -1.76 | -1.21 | -2.23 | 1.0 | 0.16 | 2.49  | -0.81 |
| A011532_01 | At3g49780 | putative protein; protein id: At   | 0 | 0.53  | 2.05  | 3.03  | 3.45  | 3.54  | 3.42  | 2.8 | 0.06 | -1.89 | -0.86 |
| A011548_01 | At3g04290 | putative GDSL-motif lipase/ac      | 0 | -2.38 | -3.89 | -3.30 | -5.29 | -4.88 | -4.79 | 1.1 | 0.10 | 2.76  | -0.24 |
| A011550_01 | At3g04140 | unknown protein; protein id: A     | 0 | 0.56  | 0.96  | 1.33  | 1.80  | 1.88  | 1.91  | 0.8 | 0.96 | -1.97 | -0.81 |

|            |           |                                   |   |       |       |       |       |       |       |     |      |       |       |
|------------|-----------|-----------------------------------|---|-------|-------|-------|-------|-------|-------|-----|------|-------|-------|
| A011557_01 | At3g02660 | putative tyrosyl-tRNA synthetase  | 0 | -0.32 | -0.41 | -0.61 | -0.69 | -0.52 | -1.08 | 0.8 | 0.66 | 2.52  | 0.24  |
| A011569_01 | At3g06130 | expressed protein; protein id:    | 0 | -0.14 | -0.60 | -0.68 | -0.73 | -1.36 | -1.38 | 1.7 | 0.06 | 2.53  | 0.68  |
| A011606_01 | At3g55120 | chalcone isomerase; protein id:   | 0 | -2.09 | -1.51 | -1.17 | -1.29 | -1.38 | -0.87 | 1.5 | 0.06 | 1.54  | -2.17 |
| A011607_01 | At3g52340 | expressed protein; protein id:    | 0 | 1.05  | 1.03  | 1.00  | 0.65  | 0.39  | 1.25  | 1.2 | 0.06 | -1.03 | 1.30  |
| A011613_01 | At3g23640 | glycosyl hydrolase family 31; j   | 0 | 1.17  | 1.32  | 1.26  | 0.94  | 0.95  | 0.75  | 0.8 | 0.81 | -1.05 | 1.62  |
| A011614_01 | At3g14240 | subtilisin-like serine protease;  | 0 | -0.31 | -0.77 | -1.34 | -1.80 | -2.32 | -2.74 | 0.9 | 0.31 | 2.57  | 0.84  |
| A011622_01 | At3g21250 | ABC transporter family protein    | 0 | 0.31  | 1.16  | 1.39  | 1.14  | 1.10  | 1.90  | 1.1 | 0.10 | -1.77 | -0.43 |
| A011631_01 | At3g61260 | putative DNA-binding protein;     | 0 | 1.37  | 1.41  | 1.45  | 1.56  | 1.40  | 1.30  | 0.8 | 0.48 | -1.73 | 0.93  |
| A011650_01 | At3g09200 | putative 60S acidic ribosomal     | 0 | -0.57 | -0.74 | -0.76 | -1.18 | -1.32 | -1.15 | 0.8 | 0.96 | 2.75  | 0.11  |
| A011662_01 | At3g01980 | putative dehydrogenase; prot      | 0 | -1.04 | -1.45 | -1.41 | -1.57 | -1.48 | -1.77 | 1.0 | 0.16 | 2.75  | -0.67 |
| A011666_01 | At3g13180 | sun protein (fmu protein), put    | 0 | -0.94 | -1.19 | -1.12 | -1.63 | -1.08 | -1.32 | 1.0 | 0.26 | 2.58  | -0.81 |
| A011671_01 | At3g04400 | ribosomal protein L17, putativ    | 0 | -1.02 | -1.06 | -0.90 | -1.27 | -1.46 | -1.12 | 1.0 | 0.18 | 2.63  | -0.73 |
| A011673_01 | At3g09440 | heat-shock protein (At-hsc70-     | 0 | -0.37 | 0.14  | -0.13 | -1.54 | -1.73 | -1.03 | 0.8 | 0.55 | 1.98  | 1.00  |
| A011677_01 | At3g45600 | putative protein; protein id: At  | 0 | 0.55  | 0.85  | 0.99  | 1.02  | 1.06  | 0.85  | 0.9 | 0.37 | -1.85 | 0.15  |
| A011678_01 | At3g54960 | protein disulfide-isomerase-lik   | 0 | -1.00 | -0.70 | -0.90 | -1.26 | -0.88 | -0.90 | 0.7 | 2.21 | 2.37  | -0.97 |
| A011689_01 | At3g50060 | myb DNA-binding protein (MY       | 0 | -0.37 | -0.16 | -0.53 | -1.04 | -1.18 | -1.40 | 0.8 | 0.81 | 2.43  | 0.87  |
| A011692_01 | At3g54050 | fructose-bisphosphatase prec      | 0 | 0.68  | 0.88  | 0.91  | 1.08  | 0.85  | 0.84  | 1.1 | 0.10 | -1.82 | 0.56  |
| A011722_01 | At3g46040 | cytoplasmic ribosomal proteir     | 0 | -0.11 | -0.59 | -0.69 | -1.07 | -1.31 | -1.31 | 1.0 | 0.16 | 2.61  | 0.73  |
| A011726_01 | At3g15353 | expressed protein; protein id:    | 0 | 1.56  | 2.54  | 2.66  | 3.09  | 3.26  | 3.64  | 1.3 | 0.06 | -2.06 | -0.26 |
| A011732_01 | At3g62420 | bZIP family transcription factc   | 0 | 1.06  | 1.22  | 1.05  | 1.01  | 0.82  | 1.06  | 0.7 | 1.61 | -1.46 | 1.32  |
| A011750_01 | At3g58740 | citrate synthase -like protein;   | 0 | 0.97  | 1.03  | 0.92  | 1.08  | 1.15  | 1.27  | 1.0 | 0.16 | -1.93 | 0.43  |
| A011755_01 | At3g04730 | auxin-induced protein; proteir    | 0 | 0.87  | 1.03  | 1.13  | 1.17  | 0.80  | 1.03  | 0.7 | 0.96 | -1.65 | 0.86  |
| A011761_01 | At3g05000 | unknown protein; protein id: A    | 0 | -0.80 | -0.73 | -0.91 | -0.87 | -1.07 | -1.11 | 0.8 | 0.96 | 2.73  | -0.57 |
| A011763_01 | At3g14990 | 4-methyl-5(b-hydroxyethyl)-th     | 0 | 1.26  | 1.29  | 1.22  | 0.97  | 0.94  | 0.97  | 0.7 | 0.96 | -1.25 | 1.58  |
| A011766_01 | At3g23750 | receptor-like kinase, putative;   | 0 | 0.01  | -0.02 | -0.46 | -0.97 | -1.23 | -1.11 | 1.1 | 0.14 | 2.24  | 1.25  |
| A011767_01 | At3g13550 | E2, ubiquitin-conjugating enzy    | 0 | 0.73  | 0.97  | 0.99  | 1.11  | 1.23  | 1.30  | 1.3 | 0.06 | -2.06 | -0.02 |
| A011770_01 | At3g03890 | auxin-regulated protein; prote    | 0 | 0.53  | 0.72  | 0.73  | 0.78  | 0.85  | 1.03  | 0.7 | 1.61 | -2.05 | 0.00  |
| A011772_01 | At3g49240 | putative protein; protein id: At  | 0 | -1.05 | -0.97 | -0.86 | -1.42 | -1.68 | -1.39 | 1.9 | 0.06 | 2.59  | -0.22 |
| A011777_01 | At3g13445 | transcription initiation factor T | 0 | 1.49  | 1.51  | 1.83  | 1.54  | 1.37  | 0.89  | 0.9 | 0.41 | -1.09 | 1.27  |
| A011781_01 | At3g51920 | putative calmodulin; protein ic   | 0 | 1.39  | 1.89  | 2.11  | 2.53  | 2.59  | 2.76  | 1.0 | 0.26 | -2.06 | -0.19 |
| A011784_01 | At3g04790 | putative ribose 5-phosphate is    | 0 | -0.44 | -0.26 | -0.36 | -0.55 | -0.78 | -1.04 | 0.8 | 0.48 | 2.42  | 0.39  |
| A011788_01 | At3g21360 | unknown protein; protein id: A    | 0 | 0.32  | 0.40  | 0.62  | 1.08  | 1.32  | 1.11  | 0.8 | 0.48 | -1.77 | -1.16 |
| A011807_01 | At3g03150 | expressed protein; protein id:    | 0 | 0.91  | 0.72  | 0.83  | 1.30  | 0.94  | 0.65  | 0.7 | 1.61 | -1.46 | 0.57  |
| A011808_01 | At3g56130 | putative protein; protein id: At  | 0 | -0.43 | -0.83 | -1.11 | -1.97 | -1.84 | NA    | 0.6 | 4.47 | NA    | NA    |
| A011810_01 | At3g04720 | hevein-like protein precursor     | 0 | 2.52  | 2.65  | 2.08  | 1.86  | 1.73  | 0.78  | 1.2 | 0.06 | -0.58 | 1.85  |
| A011811_01 | At3g19710 | branched-chain amino acid ai      | 0 | 0.38  | 1.69  | 3.53  | 3.78  | 4.13  | 5.77  | 1.1 | 0.14 | -1.80 | -1.24 |
| A011814_01 | At3g52930 | fructose bisphosphate aldolas     | 0 | -0.44 | -0.54 | -0.68 | -1.27 | -1.61 | -1.32 | 0.7 | 1.61 | 2.55  | 0.65  |
| A011819_01 | At3g61890 | homeobox-leucine zipper proi      | 0 | 2.21  | 2.13  | 2.50  | 2.32  | 2.33  | 2.75  | 0.9 | 0.37 | -1.91 | 0.62  |
| A011820_01 | At3g56360 | putative protein; protein id: At  | 0 | 1.39  | 1.55  | 1.66  | 1.93  | 1.82  | 2.18  | 0.8 | 0.48 | -2.00 | 0.11  |
| A011831_01 | At3g51130 | putative protein; protein id: At  | 0 | 1.16  | 1.02  | 0.96  | 0.94  | 0.90  | 1.36  | 0.9 | 0.31 | -1.66 | 0.88  |
| A011854_01 | At3g45640 | mitogen-activated protein kin     | 0 | 1.08  | 1.37  | 1.21  | 1.25  | 1.04  | 1.19  | 0.7 | 0.96 | -1.65 | 1.06  |
| A011858_01 | At3g54080 | putative protein; protein id: At  | 0 | -0.68 | -0.83 | -0.78 | -1.08 | -1.28 | -1.36 | 1.2 | 0.06 | 2.78  | -0.04 |
| A011861_01 | At3g54820 | aquaporin/MIP - like protein; p   | 0 | -1.72 | -2.19 | -2.09 | -2.51 | -2.51 | -2.61 | 1.2 | 0.06 | 2.76  | -0.68 |
| A011862_01 | At3g54140 | peptide transport - like proteir  | 0 | 1.52  | 2.09  | 2.13  | 2.23  | 2.24  | 2.43  | 2.0 | 0.06 | -1.99 | 0.30  |

|            |           |                                  |   |       |       |       |       |       |       |     |      |       |       |
|------------|-----------|----------------------------------|---|-------|-------|-------|-------|-------|-------|-----|------|-------|-------|
| A011864_01 | At3g54200 | putative protein; protein id: At | 0 | 0.49  | 1.26  | 1.50  | 1.24  | 0.74  | 1.40  | 0.8 | 0.55 | -1.48 | 0.28  |
| A011870_01 | At3g48430 | similar to zinc finger protein - | 0 | -0.38 | -0.38 | -0.37 | -0.33 | -1.25 | -0.03 | 0.8 | 0.55 | 1.38  | -0.22 |
| A011872_01 | At3g61520 | putative protein; protein id: At | 0 | -1.40 | -0.98 | -0.86 | -1.09 | -1.04 | -1.23 | 0.7 | 1.61 | 2.25  | -1.42 |
| A011875_01 | At3g57690 | arabinogalactan-protein, puta    | 0 | 0.40  | 0.64  | 0.85  | 0.88  | 1.21  | 1.43  | 0.9 | 0.37 | -1.95 | -0.77 |
| A011896_01 | At3g07820 | polygalacturonase, putative; p   | 0 | 0.40  | 0.74  | 1.25  | 1.24  | 1.55  | 2.13  | 1.4 | 0.06 | -1.86 | -0.95 |
| A011912_01 | At3g45300 | isovaleryl-CoA-dehydrogenas      | 0 | 2.96  | 2.55  | 2.40  | 2.17  | 2.27  | 2.36  | 0.8 | 0.48 | -1.41 | 1.39  |
| A011932_01 | At3g61930 | hypothetical protein; protein ic | 0 | 2.07  | 1.86  | 1.41  | 0.52  | 1.48  | 2.63  | 0.9 | 0.41 | -0.93 | 0.68  |
| A011935_01 | At3g62460 | putative protein; protein id: At | 0 | -0.55 | -0.69 | -0.56 | -1.13 | -0.90 | -1.16 | 0.8 | 0.81 | 2.68  | 0.02  |
| A011949_01 | At3g57150 | putative protein; protein id: At | 0 | -0.76 | -0.96 | -0.94 | -1.69 | -1.82 | -1.88 | 0.8 | 0.55 | 2.73  | 0.31  |
| A011957_01 | At3g06210 | hypothetical protein; protein ic | 0 | 1.27  | 1.14  | 0.99  | 0.76  | 0.33  | 1.02  | 0.7 | 2.21 | -0.72 | 1.77  |
| A011963_01 | At3g27960 | hypothetical protein; protein ic | 0 | 0.80  | 1.59  | 1.59  | 2.38  | 1.50  | 1.33  | 0.7 | 1.20 | -1.54 | 0.13  |
| A011976_01 | At3g10910 | putative RING zinc finger prot   | 0 | 1.09  | 1.36  | 1.91  | 2.14  | 1.99  | 2.40  | 1.2 | 0.06 | -2.03 | -0.33 |
| A011986_01 | xxxx      | b/t hypothetical protein At3g1:  | 0 | -0.49 | -0.85 | -0.87 | -1.13 | -0.98 | -1.21 | 0.7 | 1.20 | 2.77  | -0.15 |
| A011988_01 | At3g17465 | ribosomal protein L3; protein    | 0 | -0.53 | -0.78 | -0.76 | -1.21 | -1.43 | -1.59 | 1.4 | 0.06 | 2.71  | 0.39  |
| A012001_01 | At3g06780 | expressed protein; protein id:   | 0 | 1.02  | 1.27  | 1.23  | 1.37  | 1.21  | 1.48  | 0.8 | 0.66 | -1.95 | 0.44  |
| A012008_01 | At3g02710 | unknown protein; protein id: A   | 0 | -0.73 | -0.75 | -0.80 | -0.89 | -1.06 | -0.93 | 0.9 | 0.27 | 2.70  | -0.70 |
| A012021_01 | At3g02630 | putative stearyl-acyl carrier p  | 0 | -0.84 | -0.91 | -0.71 | -0.52 | -0.70 | -1.05 | 1.0 | 0.26 | 2.23  | -1.45 |
| A012028_01 | At3g16370 | putative APG protein; protein    | 0 | -0.80 | -0.84 | -1.09 | -1.58 | -2.63 | -2.91 | 1.3 | 0.06 | 2.47  | 0.68  |
| A012030_01 | At3g02480 | expressed protein; protein id:   | 0 | 0.62  | 0.76  | 0.99  | 1.15  | 0.91  | 1.45  | 0.7 | 2.21 | -1.97 | -0.29 |
| A012039_01 | At3g02560 | putative 40S ribosomal protei    | 0 | -0.47 | -1.06 | -1.08 | -1.75 | -1.90 | -1.70 | 1.0 | 0.20 | 2.70  | 0.42  |
| A012049_01 | At3g02875 | IAA-amino acid hydrolase (ILL    | 0 | 0.52  | 0.80  | 1.18  | 1.14  | 1.41  | 2.66  | 1.9 | 0.06 | -1.68 | -0.90 |
| A012076_01 | At3g50950 | disease resistance protein (C    | 0 | 0.56  | 0.89  | 0.73  | 0.67  | 0.70  | 0.57  | 0.7 | 0.96 | -1.33 | 1.06  |
| A012080_01 | At3g12610 | DNA-damage-repair/tolerator      | 0 | -0.65 | -1.01 | -1.15 | -1.92 | -2.62 | -3.07 | 1.0 | 0.16 | 2.58  | 0.71  |
| A012085_01 | At3g16940 | calmodulin-binding protein; pr   | 0 | 0.67  | 0.93  | 1.05  | 1.14  | 1.03  | 1.26  | 1.0 | 0.16 | -2.03 | 0.06  |
| A012093_01 | At3g07230 | putative wound-induced basic     | 0 | -1.02 | -0.92 | -0.79 | -0.95 | -0.98 | -1.03 | 0.8 | 0.96 | 2.52  | -1.28 |
| A012104_01 | At3g25165 | expressed protein; protein id:   | 0 | 0.36  | 0.80  | 1.22  | 1.19  | 1.30  | 1.70  | 0.8 | 0.81 | -1.91 | -0.73 |
| A012113_01 | At3g02750 | protein phosphatase 2C (PP2      | 0 | 0.34  | 0.68  | 1.02  | 1.24  | 1.15  | 1.54  | 0.8 | 0.55 | -1.94 | -0.88 |
| A012115_01 | At3g18680 | uridylyate kinase, putative; pro | 0 | -1.03 | -1.41 | -1.36 | -1.28 | -1.40 | -1.83 | 1.0 | 0.26 | 2.70  | -0.73 |
| A012116_01 | At3g12520 | sulphate transporter, putative   | 0 | -0.68 | -0.75 | -0.06 | 0.43  | 0.85  | 1.51  | 1.1 | 0.10 | -0.88 | -2.09 |
| A012119_01 | At3g47420 | putative protein; protein id: At | 0 | -0.46 | -0.01 | 0.48  | 0.54  | 0.89  | 1.86  | 0.9 | 0.31 | -1.28 | -1.70 |
| A012123_01 | At3g18773 | pseudogene, unknown protei       | 0 | 1.19  | 1.60  | 1.58  | 1.63  | 1.44  | 1.02  | 1.3 | 0.06 | -1.50 | 0.95  |
| A012131_01 | At3g05560 | putative 60S ribosomal protei    | 0 | -0.84 | -1.10 | -1.08 | -1.58 | -1.80 | -1.86 | 1.3 | 0.06 | 2.79  | 0.09  |
| A012144_01 | xxxx      | b/t expressed protein; protein   | 0 | 0.55  | 0.65  | 0.75  | 0.68  | 0.33  | 1.03  | 0.7 | 1.61 | -1.50 | 0.49  |
| A012155_01 | At3g03990 | expressed protein; protein id:   | 0 | 1.15  | 0.99  | 0.77  | 0.43  | 0.39  | 0.73  | 0.7 | 2.21 | -0.46 | 1.97  |
| A012159_01 | At3g09950 | hypothetical protein; protein ic | 0 | 1.20  | 0.90  | 0.64  | 0.35  | -1.09 | -0.81 | 0.8 | 0.48 | 1.24  | 1.82  |
| A012167_01 | At3g62120 | multifunctional aminoacyl-tRN    | 0 | -0.81 | -0.87 | -0.85 | -0.98 | -0.86 | -1.09 | 1.0 | 0.20 | 2.69  | -0.92 |
| A012168_01 | At3g01320 | unknown protein; protein id: A   | 0 | 0.44  | 0.54  | 0.59  | 0.78  | 0.40  | 1.05  | 0.7 | 1.20 | -1.70 | -0.09 |
| A012185_01 | At3g51160 | GDP-D-mannose-4,6-dehydr         | 0 | -0.43 | -0.19 | -0.40 | -0.79 | -1.37 | -0.77 | 1.1 | 0.14 | 2.20  | 0.64  |
| A012186_01 | At3g02130 | leucine-rich repeat transmem     | 0 | 0.37  | 0.67  | 0.79  | 0.89  | 0.85  | 1.19  | 0.6 | 4.47 | -2.00 | -0.51 |
| A012203_01 | At3g14930 | uroporphyrinogen decarboxyl      | 0 | -0.30 | -0.58 | -0.75 | -0.62 | -0.78 | -1.26 | 0.6 | 4.47 | 2.58  | 0.18  |
| A012214_01 | At3g61470 | light-harvesting chlorophyll a/l | 0 | 0.55  | 0.92  | 0.85  | 1.13  | 1.13  | 0.83  | 0.8 | 0.81 | -1.87 | 0.07  |
| A012215_01 | At3g06483 | putative pyruvate dehydrogen     | 0 | 0.45  | 0.74  | 0.70  | 1.02  | 1.01  | 0.63  | 0.8 | 0.55 | -1.77 | -0.09 |
| A012247_01 | At3g25040 | ER lumen retaining receptor (    | 0 | -0.49 | -0.65 | -0.72 | -0.74 | -1.05 | -1.01 | 0.8 | 0.66 | 2.77  | -0.05 |
| A012251_01 | At3g18240 | expressed protein; protein id:   | 0 | -1.61 | -1.68 | -1.48 | -1.67 | -1.82 | -1.90 | 1.0 | 0.16 | 2.65  | -1.08 |



|            |           |                                  |   |       |       |       |       |       |       |     |      |       |       |
|------------|-----------|----------------------------------|---|-------|-------|-------|-------|-------|-------|-----|------|-------|-------|
| A012256_01 | At3g10320 | unknown protein; protein id: A   | 0 | 1.88  | 1.68  | 2.02  | 1.85  | 2.29  | 3.27  | 0.9 | 0.26 | -1.83 | -0.06 |
| A012257_01 | At3g10340 | putative phenylalanine ammo      | 0 | -0.50 | 0.32  | 1.43  | 3.39  | 2.94  | 2.43  | 1.0 | 0.26 | -1.49 | -1.54 |
| A012259_01 | At3g07540 | expressed protein; protein id:   | 0 | -0.66 | -1.32 | -1.94 | -2.82 | -3.25 | -3.40 | 0.6 | 2.21 | 2.66  | 0.67  |
| A012264_01 | At3g08990 | Yippee-like protein; protein id  | 0 | -0.90 | -1.06 | -0.83 | -0.76 | -0.75 | -0.96 | 0.8 | 0.55 | 2.22  | -1.70 |
| A012275_01 | At3g07700 | expressed protein; protein id:   | 0 | 1.08  | 1.65  | 1.58  | 1.68  | 1.99  | 2.45  | 1.5 | 0.06 | -2.01 | -0.10 |
| A012283_01 | At3g22560 | hypothetical protein; protein ic | 0 | 1.16  | 1.47  | 1.67  | 2.12  | 2.09  | 1.87  | 1.0 | 0.20 | -2.01 | -0.13 |
| A012309_01 | At3g28500 | acidic ribosomal protein P2b (   | 0 | -0.64 | -0.81 | -0.83 | -1.27 | -1.60 | -1.59 | 1.1 | 0.10 | 2.74  | 0.29  |
| A012311_01 | At3g05590 | putative 60S ribosomal protei    | 0 | -0.78 | -0.76 | -0.69 | -1.27 | -1.41 | -1.07 | 1.3 | 0.06 | 2.64  | -0.13 |
| A012324_01 | At3g56070 | peptidylprolyl isomerase; prot   | 0 | -1.24 | -1.64 | -1.37 | -2.29 | -2.68 | -2.76 | 1.6 | 0.06 | 2.77  | 0.11  |
| A012331_01 | At3g16240 | delta tonoplast integral protein | 0 | -0.03 | -0.57 | -0.96 | -2.90 | -3.18 | -2.78 | 1.7 | 0.06 | 2.38  | 1.10  |
| A012337_01 | At3g45050 | putative protein; protein id: At | 0 | -0.41 | -0.52 | -0.54 | -0.38 | -0.57 | -1.02 | 0.8 | 0.96 | 2.43  | -0.34 |
| A012360_01 | At3g11310 | hypothetical protein; protein ic | 0 | 0.69  | 1.06  | 0.95  | 1.09  | 1.11  | 0.99  | 0.9 | 0.37 | -1.91 | 0.39  |
| A012367_01 | At3g21650 | B regulatory subunit of PP2A,    | 0 | 0.92  | 1.07  | 0.98  | 0.95  | 0.90  | 1.38  | 1.0 | 0.16 | -1.82 | 0.64  |
| A012369_01 | At3g44240 | CCR4-associated factor 1-like    | 0 | 2.63  | 1.51  | 0.78  | 1.49  | 0.98  | 0.61  | 0.8 | 0.81 | -0.15 | 1.77  |
| A012371_01 | At3g55760 | putative protein; protein id: At | 0 | -0.13 | -0.56 | -0.73 | -0.88 | -1.07 | -1.47 | 0.8 | 0.66 | 2.58  | 0.69  |
| A012372_01 | At3g15530 | expressed protein; protein id:   | 0 | 0.32  | 0.55  | 0.19  | -0.73 | -1.23 | -0.77 | 1.8 | 0.06 | 1.64  | 1.57  |
| A012375_01 | At3g12680 | hypothetical protein; protein ic | 0 | 0.61  | 0.74  | 0.88  | 0.98  | 0.86  | 1.16  | 1.0 | 0.16 | -2.02 | 0.00  |
| A012379_01 | At3g16110 | putative protein disulfide isom  | 0 | 1.29  | 1.40  | 1.48  | 1.63  | 1.33  | 1.47  | 1.0 | 0.26 | -1.83 | 0.75  |
| A012382_01 | At3g55690 | putative protein; protein id: At | 0 | -0.61 | -0.79 | -0.75 | -1.17 | -1.41 | -0.94 | 0.8 | 0.81 | 2.62  | -0.07 |
| A012385_01 | At3g06040 | hypothetical protein; protein ic | 0 | 1.21  | 0.90  | 0.90  | 1.14  | 1.14  | 1.02  | 1.2 | 0.06 | -1.65 | 0.85  |
| A012398_01 | At3g11650 | hairpin-induced protein, putat   | 0 | 0.26  | 0.39  | 0.68  | 1.01  | 1.09  | 1.22  | 1.1 | 0.14 | -1.84 | -1.18 |
| A012404_01 | At3g12900 | hypothetical protein; protein ic | 0 | 0.81  | 0.83  | 0.74  | 0.97  | 1.20  | 0.66  | 0.7 | 0.96 | -1.63 | 0.44  |
| A012421_01 | At3g19500 | expressed protein; protein id:   | 0 | 1.06  | 1.18  | 1.18  | 1.26  | 1.26  | 1.57  | 1.0 | 0.18 | -1.99 | 0.37  |
| A012429_01 | At3g29690 | hypothetical protein; protein ic | 0 | -1.46 | -3.19 | -1.91 | -3.78 | -3.08 | -3.71 | 1.2 | 0.06 | 2.69  | -0.32 |
| A012430_01 | At3g59270 | putative protein; protein id: At | 0 | 3.26  | 3.18  | 2.92  | 2.92  | 2.27  | 1.59  | 1.0 | 0.18 | -0.97 | 1.67  |
| A012449_01 | At3g23620 | expressed protein; protein id:   | 0 | -0.35 | -0.60 | -0.62 | -1.38 | -1.07 | -1.46 | 0.6 | 4.47 | 2.56  | 0.58  |
| A012454_01 | At3g50070 | cyclin D3;3; protein id: At3g50  | 0 | -0.77 | -1.33 | -1.37 | -1.85 | -1.90 | -1.91 | 1.6 | 0.06 | 2.77  | -0.02 |
| A012458_01 | At3g04120 | glyceraldehyde-3-phosphate (     | 0 | -1.23 | -1.14 | -0.96 | -1.31 | -1.51 | -0.73 | 0.7 | 1.61 | 2.14  | -1.22 |
| A012467_01 | At3g21230 | putative 4-coumarate:CoA lig     | 0 | 0.44  | 1.26  | 2.03  | 2.95  | 2.67  | 2.38  | 0.8 | 0.48 | -1.80 | -0.91 |
| A012468_01 | At3g53810 | serine/threonine-specific kina   | 0 | 0.77  | 1.00  | 0.99  | 1.15  | 1.21  | 1.60  | 0.7 | 1.20 | -2.03 | -0.12 |
| A012479_01 | At3g13230 | expressed protein; protein id:   | 0 | -0.86 | -0.92 | -0.81 | -1.64 | -1.50 | -1.47 | 0.9 | 0.31 | 2.61  | 0.03  |
| A012493_01 | At3g50100 | exonuclease, putative; proteir   | 0 | -0.83 | -1.29 | -1.26 | -1.43 | -1.58 | -1.60 | 1.0 | 0.16 | 2.80  | -0.35 |
| A012502_01 | At3g07870 | F-box protein family; protein i  | 0 | 1.58  | 1.64  | 1.81  | 1.90  | 1.79  | 1.71  | 1.4 | 0.06 | -1.86 | 0.69  |
| A012518_01 | At3g60570 | expansin family; protein id: At  | 0 | 0.39  | 0.70  | 0.95  | 0.93  | 1.03  | 1.37  | 1.2 | 0.06 | -1.96 | -0.59 |
| A012526_01 | At3g07770 | putative heat-shock protein; p   | 0 | -1.47 | -1.15 | -0.87 | -1.39 | -1.21 | -1.35 | 2.0 | 0.06 | 2.32  | -1.21 |
| A012572_01 | At3g06510 | glycosyl hydrolase family 1; p   | 0 | 1.04  | 1.10  | 1.09  | 1.57  | 1.70  | 1.80  | 1.6 | 0.06 | -2.03 | -0.25 |
| A012578_01 | At3g25920 | 50S ribosomal protein L15, cl    | 0 | -0.55 | -1.03 | -1.23 | -1.19 | -1.42 | -2.00 | 0.6 | 4.47 | 2.69  | 0.15  |
| A012581_01 | At3g02550 | expressed protein; protein id:   | 0 | -0.92 | -2.21 | -1.14 | -3.23 | -2.60 | -2.79 | 1.1 | 0.14 | 2.67  | -0.01 |
| A012590_01 | At3g55280 | ribosomal L23a - like protein;   | 0 | -0.74 | -0.93 | -0.88 | -1.58 | -1.97 | -1.79 | 1.7 | 0.06 | 2.67  | 0.37  |
| A012595_01 | At3g62640 | putative protein; protein id: At | 0 | 0.18  | 0.33  | 0.76  | 0.95  | 0.90  | 1.38  | 0.7 | 1.61 | -1.79 | -1.16 |
| A012633_01 | At3g16870 | GATA zinc finger protein; proi   | 0 | -0.11 | -0.13 | -0.27 | -0.92 | -1.17 | -1.05 | 0.9 | 0.41 | 2.34  | 1.10  |
| A012640_01 | At3g54470 | similar to UMP synthase {Ara     | 0 | -1.06 | -1.15 | -1.01 | -1.71 | -1.57 | -1.71 | 0.8 | 0.48 | 2.74  | -0.27 |
| A012641_01 | At3g25660 | glutamyl-tRNA amidotransfer;     | 0 | -0.44 | -0.65 | -0.86 | -1.05 | -0.97 | -1.16 | 0.7 | 1.61 | 2.78  | 0.09  |
| A012646_01 | At3g44670 | disease resistance protein RF    | 0 | 0.92  | 1.29  | 1.07  | 0.80  | 0.65  | 0.99  | 0.6 | 2.21 | -1.17 | 1.43  |

|            |           |                                   |   |       |       |       |       |       |       |     |      |       |       |
|------------|-----------|-----------------------------------|---|-------|-------|-------|-------|-------|-------|-----|------|-------|-------|
| A012651_01 | At3g58490 | putative protein; protein id: At  | 0 | 0.56  | 0.63  | 0.78  | 1.01  | 1.14  | 1.23  | 1.2 | 0.06 | -2.02 | -0.56 |
| A012654_01 | At3g23940 | dihydroxyacid dehydratase, p      | 0 | -1.17 | -1.47 | -1.49 | -2.23 | -2.32 | -2.47 | 1.0 | 0.18 | 2.80  | 0.03  |
| A012655_01 | At3g23970 | hypothetical protein; protein ic  | 0 | 1.99  | 2.23  | 1.95  | 2.02  | 2.11  | 1.58  | 1.9 | 0.06 | -1.53 | 1.17  |
| A012665_01 | At3g62880 | putative protein; protein id: At  | 0 | 0.51  | 0.73  | 0.80  | 0.94  | 1.03  | 1.08  | 0.6 | 2.21 | -2.06 | -0.33 |
| A012672_01 | At3g52800 | zinc finger - like protein; prote | 0 | 1.08  | 1.47  | 1.65  | 1.76  | 1.60  | 1.93  | 1.1 | 0.10 | -2.01 | 0.14  |
| A012678_01 | At3g15510 | putative jasmonic acid regula     | 0 | 0.37  | 1.52  | 2.82  | 3.33  | 3.38  | 3.94  | 2.3 | 0.06 | -1.86 | -1.13 |
| A012685_01 | At3g50830 | putative cold acclimation prot    | 0 | 0.71  | 1.12  | 1.01  | 1.10  | 1.26  | 1.44  | 1.3 | 0.06 | -2.03 | 0.02  |
| A012694_01 | At3g26580 | unknown protein; protein id: A    | 0 | 1.44  | 1.44  | 1.53  | 1.62  | 1.35  | 1.46  | 0.7 | 1.20 | -1.76 | 0.90  |
| A012695_01 | At3g62260 | protein phosphatase 2C (PP2       | 0 | 1.47  | 1.76  | 1.77  | 1.46  | 1.38  | 1.83  | 1.0 | 0.16 | -1.69 | 0.99  |
| A012700_01 | At3g52500 | expressed protein; protein id:    | 0 | -0.99 | -1.27 | -1.49 | -1.83 | -2.19 | -2.29 | 1.1 | 0.10 | 2.79  | 0.11  |
| A012705_01 | At3g52240 | hypothetical protein; protein ic  | 0 | 0.88  | 0.74  | 0.73  | 0.61  | 1.00  | 0.61  | 0.6 | 4.47 | -1.38 | 1.01  |
| A012707_01 | At3g51000 | epoxide hydrolase-like proteir    | 0 | 0.90  | 0.71  | 0.87  | 1.44  | 1.22  | 0.92  | 0.7 | 1.20 | -1.74 | 0.06  |
| A012722_01 | At3g53410 | putative protein; protein id: At  | 0 | 0.50  | 0.50  | 0.81  | 1.09  | 1.12  | 1.04  | 0.9 | 0.31 | -1.96 | -0.67 |
| A012724_01 | At3g53350 | putative protein; protein id: At  | 0 | 0.17  | 0.71  | 0.70  | 1.35  | 0.93  | 1.29  | 0.7 | 2.21 | -1.83 | -0.83 |
| A012732_01 | At3g06810 | acetyl-coA dehydrogenase, pi      | 0 | 1.26  | 1.16  | 1.19  | 1.08  | 1.31  | 2.36  | 1.4 | 0.06 | -1.68 | 0.04  |
| A012738_01 | At3g26890 | expressed protein; protein id:    | 0 | 0.90  | 1.04  | 0.93  | 1.01  | 0.96  | 1.14  | 1.0 | 0.20 | -1.88 | 0.72  |
| A012741_01 | At3g10500 | expressed protein; protein id:    | 0 | 0.92  | 1.27  | 1.34  | 1.56  | 1.48  | 1.62  | 1.1 | 0.14 | -2.04 | 0.05  |
| A012748_01 | At3g48580 | xyloglucan endotransglycosyl      | 0 | 1.48  | 0.90  | -0.19 | -2.12 | -2.57 | -1.83 | 1.2 | 0.06 | 1.88  | 1.63  |
| A012749_01 | At3g59060 | putative protein; protein id: At  | 0 | 1.60  | 1.94  | 2.23  | 2.53  | 2.59  | 2.49  | 1.4 | 0.06 | -2.03 | 0.05  |
| A012752_01 | At3g54090 | fructokinase - like protein; prc  | 0 | -1.59 | -1.45 | -1.45 | -1.44 | -1.47 | -2.10 | 0.8 | 0.55 | 2.56  | -1.01 |
| A012754_01 | At3g13750 | glycosyl hydrolase family 35 (    | 0 | 2.17  | 2.34  | 2.32  | 2.05  | 1.57  | 2.47  | 0.8 | 0.66 | -1.57 | 1.15  |
| A012770_01 | At3g55980 | putative protein; protein id: At  | 0 | 0.93  | 1.42  | 1.37  | 1.29  | 1.12  | 1.22  | 0.9 | 0.31 | -1.59 | 0.83  |
| A012771_01 | At3g58750 | citrate synthase -like protein;   | 0 | 1.09  | 1.02  | 0.85  | 0.84  | 0.96  | 1.16  | 1.0 | 0.14 | -1.63 | 0.96  |
| A012773_01 | At3g18080 | glycosyl hydrolase family 1; p    | 0 | -0.62 | -0.67 | -0.95 | -1.00 | -1.75 | -2.16 | 0.9 | 0.31 | 2.51  | 0.53  |
| A012796_01 | At3g61820 | putative protein; protein id: At  | 0 | -1.08 | -1.55 | -1.61 | -2.39 | -2.75 | -2.66 | 0.9 | 0.37 | 2.77  | 0.22  |
| A012797_01 | At3g27110 | expressed protein; protein id:    | 0 | 1.08  | 1.69  | 1.72  | 2.00  | 2.33  | 2.44  | 1.5 | 0.06 | -2.05 | -0.27 |
| A012810_01 | At3g56240 | copper homeostasis factor; pi     | 0 | 0.50  | 1.33  | 1.89  | 2.96  | 2.79  | 2.90  | 1.0 | 0.16 | -1.88 | -1.01 |
| A012811_01 | At3g11670 | digalactosyldiacylglycerol syn    | 0 | 0.02  | 0.35  | 0.56  | 0.92  | 1.08  | 1.14  | 1.0 | 0.18 | -1.77 | -1.38 |
| A012812_01 | At3g47950 | H+-transporting ATPase - like     | 0 | 2.80  | 2.16  | 1.94  | 0.79  | 1.72  | 2.41  | 0.6 | 4.47 | -0.87 | 1.34  |
| A012813_01 | At3g19820 | cell elongation protein, Dwarf    | 0 | -0.44 | -1.33 | -1.58 | -2.03 | -2.72 | -3.06 | 1.1 | 0.10 | 2.64  | 0.64  |
| A012835_01 | At3g17510 | expressed protein; protein id:    | 0 | 0.50  | 0.75  | 0.79  | 0.98  | 1.06  | 1.08  | 0.9 | 0.37 | -2.04 | -0.39 |
| A012844_01 | At3g04920 | putative ribosomal protein s18    | 0 | -0.51 | -0.82 | -0.84 | -1.38 | -1.78 | -1.82 | 0.9 | 0.37 | 2.64  | 0.57  |
| A012847_01 | At3g15810 | expressed protein; protein id:    | 0 | 1.29  | 1.77  | 1.85  | 1.79  | 1.73  | 1.89  | 1.6 | 0.06 | -1.89 | 0.53  |
| A012860_01 | At4g37930 | glycine hydroxymethyltransfer     | 0 | 0.70  | 1.20  | 1.13  | 1.42  | 1.36  | 1.53  | 0.9 | 0.41 | -2.03 | -0.11 |
| A012862_01 | At4g26900 | glutamine amidotransferase/c      | 0 | -0.77 | -0.98 | -0.93 | -1.30 | -1.00 | -1.46 | 1.0 | 0.16 | 2.74  | -0.41 |
| A012865_01 | At4g19420 | pectinacetylerase family; p       | 0 | 2.56  | 3.57  | 3.94  | 3.93  | 4.01  | 4.84  | 2.7 | 0.06 | -2.02 | 0.09  |
| A012872_01 | At4g23990 | cellulose synthase catalytic su   | 0 | -1.12 | -0.36 | 0.64  | 1.92  | 2.29  | 2.59  | 1.1 | 0.14 | -1.30 | -1.98 |
| A012880_01 | At4g11650 | osmotin precursor; protein id:    | 0 | 2.24  | 3.11  | 2.53  | 1.45  | 0.59  | 0.65  | 0.7 | 1.20 | -0.05 | 2.00  |
| A012883_01 | At4g37870 | phosphoenolpyruvate carboxyl      | 0 | -0.21 | -0.61 | -0.88 | -1.39 | -1.58 | -1.42 | 0.8 | 0.96 | 2.60  | 0.76  |
| A012888_01 | At4g15550 | glucosyltransferase like prote    | 0 | 0.65  | 1.01  | 1.44  | 1.82  | 2.06  | 2.15  | 1.4 | 0.06 | -1.95 | -0.91 |
| A012889_01 | At4g13540 | putative protein; protein id: At  | 0 | 0.75  | -0.26 | -0.81 | -2.39 | -3.37 | -2.50 | 0.9 | 0.41 | 2.23  | 1.29  |
| A012890_01 | At4g08900 | arginase; protein id: At4g0890    | 0 | -0.24 | -0.08 | 0.36  | 0.50  | 0.83  | 1.12  | 0.8 | 0.81 | -1.37 | -1.82 |
| A012897_01 | At4g18930 | putative protein; protein id: At  | 0 | -0.16 | -0.07 | 0.13  | 0.88  | 1.04  | 0.54  | 0.8 | 0.66 | -1.23 | -1.74 |
| A012899_01 | At4g09800 | S18.A ribosomal protein; prot     | 0 | -0.26 | -0.73 | -0.59 | -0.88 | -1.03 | -1.18 | 1.0 | 0.18 | 2.73  | 0.28  |

|            |               |                                  |   |       |       |       |       |       |       |     |      |       |       |
|------------|---------------|----------------------------------|---|-------|-------|-------|-------|-------|-------|-----|------|-------|-------|
| A012919_01 | At4g32020     | putative protein; protein id: At | 0 | 0.87  | 1.09  | 1.24  | 1.20  | 0.76  | 1.36  | 0.6 | 4.47 | -1.68 | 0.63  |
| A012934_01 | At4g08920     | Arabidopsis thaliana flavin-tyr  | 0 | 0.96  | 1.36  | 1.52  | 1.58  | 1.54  | 1.91  | 1.3 | 0.06 | -2.03 | 0.01  |
| A012940_01 | At4g10060     | putative protein; protein id: At | 0 | 0.94  | 1.54  | 1.63  | 2.05  | 2.38  | 2.27  | 1.0 | 0.20 | -2.04 | -0.45 |
| A012944_01 | At4g32070     | putative protein; protein id: At | 0 | 1.10  | 1.17  | 1.15  | 0.96  | 0.87  | 1.70  | 1.5 | 0.06 | -1.64 | 0.67  |
| A012959_01 | At4g14710     | expressed protein; protein id:   | 0 | 0.56  | 0.80  | 0.93  | 1.04  | 0.86  | 1.22  | 0.8 | 0.81 | -2.01 | -0.13 |
| A012964_01 | At4g19510     | disease resistance protein (Tl   | 0 | 1.03  | 1.32  | 1.14  | 1.33  | 1.00  | 1.24  | 1.1 | 0.14 | -1.73 | 0.90  |
| A012966_01 | At4g20070     | hyuC-like protein; protein id: / | 0 | 0.66  | 0.87  | 1.14  | 1.63  | 1.98  | 1.99  | 0.9 | 0.27 | -1.95 | -0.90 |
| A012982_01 | At4g28550     | putative protein; protein id: At | 0 | -0.02 | -0.12 | -0.46 | -0.60 | -1.15 | -0.41 | 0.7 | 1.61 | 2.04  | 0.88  |
| A012986_01 | At4g28085     | expressed protein; protein id:   | 0 | 0.55  | 1.53  | 2.30  | 2.67  | 3.11  | 3.38  | 3.3 | 0.06 | -1.92 | -1.03 |
| A013000_01 | At4g34350     | putative protein; protein id: At | 0 | 1.39  | 1.60  | 1.73  | 1.68  | 1.48  | 2.16  | 0.8 | 0.96 | -1.91 | 0.47  |
| A013004_01 | At4g18580     | expressed protein; protein id:   | 0 | 0.49  | 0.74  | 1.04  | 1.29  | 1.43  | 1.67  | 0.8 | 0.48 | -1.98 | -0.85 |
| A013032_01 | At4g24020     | putative protein; protein id: At | 0 | 0.99  | 1.08  | 1.03  | 0.96  | 0.90  | 1.38  | 1.1 | 0.10 | -1.78 | 0.74  |
| A013034_01 | At4g10910     | expressed protein; protein id:   | 0 | 2.43  | 1.32  | 0.60  | 1.25  | 0.76  | 0.31  | 1.1 | 0.10 | 0.10  | 1.81  |
| A013036_01 | At4g38430     | putative protein; protein id: At | 0 | -0.25 | -0.56 | -0.74 | -0.85 | -0.95 | -1.44 | 0.8 | 0.48 | 2.62  | 0.50  |
| A013044_01 | At4g23890     | putative protein; protein id: At | 0 | 1.17  | 1.25  | 1.32  | 1.42  | 1.11  | 1.14  | 0.8 | 0.66 | -1.69 | 0.97  |
| A013046_01 | At4g21560     | putative protein; protein id: At | 0 | 1.02  | 0.88  | 0.75  | 0.86  | 0.71  | 0.74  | 0.9 | 0.41 | -1.33 | 1.46  |
| A013047_01 | At4g35630     | phosphoserine aminotransfer      | 0 | -0.63 | -0.80 | -0.81 | -1.24 | -1.56 | -1.09 | 0.8 | 0.81 | 2.64  | 0.09  |
| A013050_01 | At4g01026     | expressed protein; protein id:   | 0 | 0.85  | 0.96  | 0.87  | 0.96  | 0.94  | 1.17  | 0.8 | 0.48 | -1.93 | 0.55  |
| A013063_01 | At4g18530     | putative protein; protein id: At | 0 | 0.38  | 0.40  | 0.76  | 1.04  | 1.13  | 1.27  | 0.9 | 0.31 | -1.87 | -1.05 |
| A013086_01 | At4g21580     | putative NADPH quinone oxic      | 0 | 1.33  | 0.95  | 0.82  | 1.02  | 1.04  | 0.93  | 1.1 | 0.10 | -1.36 | 1.22  |
| A013087_01 | At4g22670     | HSP associated protein like; p   | 0 | -0.06 | -0.34 | -0.45 | -0.79 | -1.05 | -1.20 | 0.7 | 2.21 | 2.51  | 0.95  |
| A013095_01 | At4g02520     | glutathione transferase, putat   | 0 | 3.46  | 3.47  | 3.13  | 3.31  | 2.64  | 1.88  | 1.0 | 0.16 | -1.10 | 1.55  |
| A013105_01 | At4g38260     | putative protein; protein id: At | 0 | 0.30  | 0.48  | 0.92  | 0.92  | 1.08  | 0.95  | 0.9 | 0.27 | -1.89 | -0.75 |
| A013107_01 | At4g12980     | putative protein; protein id: At | 0 | 0.47  | 0.74  | 0.99  | 1.43  | 1.22  | 1.22  | 0.6 | 4.47 | -1.95 | -0.61 |
| A013109_01 | At4g36030     | A.t. DNA chromosome 4, BAC       | 0 | 0.68  | 1.06  | 0.90  | 1.01  | 0.91  | 0.79  | 1.0 | 0.20 | -1.68 | 0.78  |
| A013119_01 | At4g31700     | ribosomal protein S6 - like; pr  | 0 | -0.71 | -1.03 | -1.17 | -2.02 | -2.52 | -2.13 | 0.9 | 0.37 | 2.63  | 0.55  |
| A013142_01 | At4g24120     | putative protein; protein id: At | 0 | 0.70  | 1.19  | 1.34  | 1.46  | 1.65  | 2.23  | 1.3 | 0.06 | -1.99 | -0.53 |
| A013164_01 | At4g16720     | ribosomal protein; protein id: , | 0 | -0.60 | -0.78 | -0.78 | -1.18 | -1.14 | -1.18 | 0.8 | 0.66 | 2.79  | -0.05 |
| A013188_01 | At4g08950     | putative phi-1-like phosphate-   | 0 | 0.11  | 0.10  | -0.62 | -2.16 | -2.70 | -2.55 | 1.1 | 0.14 | 2.21  | 1.31  |
| A013240_01 | At4g10920     | putative protein; protein id: At | 0 | 2.16  | 1.75  | 1.61  | 1.75  | 1.52  | 1.64  | 1.7 | 0.06 | -1.38 | 1.38  |
| A013246_01 | At4g25890     | putative acidic ribosomal prot   | 0 | -1.05 | -1.19 | -1.13 | -2.34 | -1.81 | -1.78 | 1.0 | 0.26 | 2.65  | -0.06 |
| A013249_01 | At4g21810     | putative protein; protein id: At | 0 | 0.48  | 0.59  | 0.65  | 0.92  | 1.05  | 0.98  | 0.8 | 0.48 | -2.01 | -0.53 |
| A013260_01 | At4g10330     | hypothetical protein; protein ic | 0 | 0.59  | 0.86  | 0.83  | 1.03  | 1.15  | 1.21  | 0.6 | 4.47 | -2.06 | -0.24 |
| A013299_01 | At4g39880     | putative protein; protein id: At | 0 | -0.65 | -0.77 | -0.75 | -1.11 | -1.44 | -1.15 | 1.5 | 0.06 | 2.73  | 0.01  |
| A013416_01 | At4g37910     | glycine hydroxymethyltransfer    | 0 | -1.24 | -0.96 | -0.91 | -1.64 | -1.63 | -1.46 | 1.1 | 0.10 | 2.50  | -0.33 |
| A013417_01 | At4g32480     | putative protein; protein id: At | 0 | 1.80  | 1.34  | 1.08  | -0.47 | -0.81 | -0.84 | 0.7 | 2.21 | 1.27  | 2.03  |
| A013429_01 | At4g01330     | putative protein kinase; protei  | 0 | 1.51  | 1.27  | 0.94  | 0.37  | -0.08 | -0.04 | 0.8 | 0.48 | 0.65  | 2.20  |
| A013435_01 | At4g01600     | putative ABA-repsponsive prot    | 0 | 1.34  | 2.17  | 2.00  | 1.90  | 1.64  | 2.14  | 1.0 | 0.16 | -1.78 | 0.67  |
| A013468_01 | At4g03410     | hypothetical protein; protein ic | 0 | 1.16  | 1.53  | 1.73  | 1.97  | 1.75  | 1.98  | 1.3 | 0.06 | -2.03 | 0.09  |
| A013470_01 | At4g03560     | putative calcium channel; pro    | 0 | 1.38  | 1.78  | 2.00  | 2.17  | 2.39  | 2.36  | 1.5 | 0.06 | -2.06 | -0.03 |
| A013488_01 | At4g04890     | homeodomain protein, Protoc      | 0 | -0.45 | -0.65 | -0.72 | -1.05 | -1.38 | -1.43 | 1.0 | 0.18 | 2.70  | 0.46  |
| A013535_01 | At4g14020     | expressed protein; protein id:   | 0 | 2.17  | 3.27  | 3.47  | 4.06  | 3.84  | 4.58  | 1.3 | 0.06 | -2.06 | -0.14 |
| A013537_01 | At4g14270     | expressed protein; protein id:   | 0 | 1.78  | 1.51  | 1.35  | 1.19  | 0.83  | 0.66  | 0.8 | 0.66 | -0.52 | 1.98  |
| A013554_01 | not annotated | Chr4 C/7628038-7628107           | 0 | -2.07 | -2.13 | -2.49 | -3.53 | -3.81 | -3.17 | 0.7 | 2.21 | 2.70  | -0.08 |

|            |           |                                  |   |       |       |       |       |       |       |     |      |       |       |
|------------|-----------|----------------------------------|---|-------|-------|-------|-------|-------|-------|-----|------|-------|-------|
| A013559_01 | At4g15620 | hypothetical protein; protein ic | 0 | 0.92  | 1.47  | 2.22  | 2.76  | 2.83  | 2.89  | 1.9 | 0.06 | -1.99 | -0.80 |
| A013560_01 | At4g15630 | expressed protein; protein id:   | 0 | 0.96  | 1.49  | 1.89  | 2.14  | 1.81  | 1.85  | 1.4 | 0.06 | -1.91 | -0.06 |
| A013561_01 | At4g15640 | hypothetical protein; protein ic | 0 | -1.52 | -1.61 | -1.64 | -2.61 | -2.18 | -2.52 | 0.9 | 0.31 | 2.76  | -0.29 |
| A013586_01 | At4g17070 | expressed protein; protein id:   | 0 | 0.39  | 0.87  | 0.94  | 1.10  | 1.41  | 1.30  | 1.1 | 0.10 | -1.98 | -0.65 |
| A013605_01 | At4g28290 | putative protein; protein id: At | 0 | 0.95  | 1.26  | 1.41  | 1.45  | 1.61  | 1.50  | 1.1 | 0.14 | -2.00 | 0.14  |
| A013606_01 | At4g28660 | photosystem II protein W - lik   | 0 | -0.72 | -0.85 | -1.01 | -1.24 | -1.25 | -1.67 | 0.7 | 0.96 | 2.78  | -0.01 |
| A013614_01 | At4g30500 | putative protein; protein id: At | 0 | -0.55 | -0.98 | -0.76 | -1.06 | -1.30 | -1.15 | 0.8 | 0.66 | 2.72  | -0.28 |
| A013619_01 | At4g31110 | WAK-like kinase (WLK); prote     | 0 | 0.92  | 0.99  | 1.00  | 1.10  | 0.98  | 1.00  | 0.8 | 0.55 | -1.84 | 0.77  |
| A013625_01 | At4g36420 | ribosomal protein; protein id: . | 0 | -0.72 | -0.74 | -0.70 | -1.02 | -1.21 | -1.20 | 1.4 | 0.06 | 2.77  | -0.16 |
| A013627_01 | At4g36490 | expressed protein; protein id:   | 0 | 0.42  | 0.85  | 1.33  | 1.30  | 1.47  | 1.95  | 0.9 | 0.37 | -1.94 | -0.84 |
| A013632_01 | At4g36640 | putative protein; protein id: At | 0 | 0.49  | 0.91  | 0.77  | 0.66  | 0.75  | 1.13  | 0.7 | 0.96 | -1.83 | 0.22  |
| A013633_01 | At4g36660 | hypothetical protein; protein ic | 0 | -0.82 | -1.02 | -0.98 | -1.09 | -1.14 | -1.61 | 1.0 | 0.20 | 2.74  | -0.42 |
| A013637_01 | At4g36940 | hypothetical protein; protein ic | 0 | -0.93 | -0.85 | -0.93 | -0.76 | -1.31 | -1.41 | 0.6 | 2.21 | 2.59  | -0.52 |
| A013657_01 | At4g12080 | putative DNA-binding protein;    | 0 | 0.94  | 0.92  | 1.51  | 1.52  | 1.92  | 2.04  | 0.6 | 4.47 | -1.99 | -0.59 |
| A013659_01 | At4g10610 | RNA-binding protein RBP37;       | 0 | 1.08  | 0.38  | 0.32  | 0.12  | -0.07 | -0.15 | 0.6 | 4.47 | 0.96  | 1.98  |
| A013664_01 | At4g24640 | Bnm1 like protein; protein id: . | 0 | 0.13  | 0.47  | 0.74  | 0.69  | 0.67  | 1.13  | 0.6 | 4.47 | -1.82 | -0.92 |
| A013669_01 | At4g24190 | HSP90-like protein; protein id   | 0 | -1.22 | -0.96 | -1.17 | -1.50 | -1.62 | -1.78 | 1.2 | 0.06 | 2.70  | -0.30 |
| A013676_01 | At4g35690 | putative protein; protein id: At | 0 | 3.33  | 3.01  | 2.27  | 1.44  | 0.85  | 0.26  | 1.0 | 0.16 | 0.25  | 2.17  |
| A013691_01 | At4g09960 | MADS-box protein; protein id:    | 0 | -0.85 | -1.45 | -1.32 | -3.14 | -3.00 | -2.54 | 0.9 | 0.31 | 2.64  | 0.42  |
| A013695_01 | At4g03420 | hypothetical protein; protein ic | 0 | 0.59  | 1.03  | 1.20  | 1.23  | 1.30  | 1.29  | 1.3 | 0.06 | -1.86 | -0.07 |
| A013697_01 | At4g15610 | expressed protein; protein id:   | 0 | 3.16  | 3.41  | 3.27  | 2.93  | 3.04  | 3.50  | 1.0 | 0.14 | -1.75 | 1.00  |
| A013699_01 | At4g17560 | putative protein; protein id: At | 0 | -0.22 | -0.63 | -0.67 | -0.70 | -1.19 | -1.43 | 0.7 | 2.21 | 2.57  | 0.54  |
| A013711_01 | At4g15910 | drought-induced protein like; j  | 0 | -0.74 | -2.44 | -2.87 | -3.55 | -2.58 | -3.06 | 0.8 | 0.48 | 2.58  | 0.02  |
| A013714_01 | At4g01610 | cathepsin B-like cysteine prot   | 0 | 1.67  | 1.69  | 1.72  | 1.52  | 1.47  | 1.95  | 0.9 | 0.41 | -1.74 | 0.94  |
| A013717_01 | At4g16190 | cysteine proteinase; protein ic  | 0 | 1.19  | 1.59  | 2.01  | 1.98  | 2.03  | 2.32  | 0.9 | 0.37 | -2.06 | -0.09 |
| A013719_01 | At4g15530 | pyruvate,orthophosphate dikin    | 0 | 1.78  | 2.26  | 2.25  | 2.27  | 2.50  | 3.02  | 1.6 | 0.06 | -2.01 | 0.23  |
| A013732_01 | At4g21990 | PRH26 protein; protein id: At    | 0 | -0.56 | 0.03  | 0.88  | 0.69  | 0.75  | 1.92  | 0.9 | 0.31 | -1.27 | -1.68 |
| A013733_01 | At4g22000 | expressed protein; protein id:   | 0 | -0.24 | -0.58 | -0.63 | -1.15 | -1.59 | -1.30 | 1.1 | 0.10 | 2.59  | 0.70  |
| A013744_01 | At4g22570 | adenine phosphoribosyltransf     | 0 | 0.28  | 0.76  | 1.16  | 1.29  | 1.20  | 1.51  | 0.9 | 0.27 | -1.92 | -0.81 |
| A013747_01 | At4g25730 | putative protein; protein id: At | 0 | -0.52 | -0.56 | -0.41 | -0.80 | -1.03 | -0.87 | 0.7 | 2.21 | 2.53  | 0.06  |
| A013755_01 | At4g33030 | sulfolipid biosynthesis protein  | 0 | -1.40 | -1.63 | -1.27 | -1.16 | -1.19 | -1.45 | 1.1 | 0.14 | 2.27  | -1.71 |
| A013774_01 | At4g34200 | phosphoglycerate dehydrogen      | 0 | -1.48 | -1.67 | -1.44 | -1.56 | -1.87 | -1.91 | 0.9 | 0.31 | 2.68  | -0.91 |
| A013782_01 | At4g20930 | 3-hydroxyisobutyrate dehydro     | 0 | 1.13  | 0.89  | 0.69  | 0.66  | 0.92  | 1.02  | 0.8 | 0.66 | -1.32 | 1.01  |
| A013796_01 | At4g00355 | expressed protein; protein id:   | 0 | 0.60  | 0.78  | 0.99  | 1.22  | 1.10  | 1.28  | 0.8 | 0.55 | -2.04 | -0.39 |
| A013799_01 | At4g30993 | expressed protein; protein id:   | 0 | 0.75  | 1.28  | 1.45  | 2.06  | 1.97  | 1.68  | 1.3 | 0.06 | -1.95 | -0.44 |
| A013805_01 | At4g21980 | AtAPG8a; symbiosis-related l     | 0 | 1.54  | 1.55  | 1.53  | 1.71  | 1.62  | 2.00  | 0.9 | 0.31 | -1.92 | 0.53  |
| A013831_01 | At4g29520 | putative protein; protein id: At | 0 | -1.80 | -1.51 | -1.71 | -2.42 | -1.70 | -2.33 | 0.9 | 0.31 | 2.61  | -0.75 |
| A013833_01 | At4g01940 | putative NifU-like metalloclust  | 0 | 0.22  | 0.40  | 0.68  | 0.93  | 1.06  | 0.90  | 0.9 | 0.41 | -1.87 | -1.06 |
| A013856_01 | At4g20270 | leucine-rich repeat transmem     | 0 | -0.84 | -1.15 | -1.06 | -2.50 | -2.27 | -2.70 | 0.6 | 2.21 | 2.68  | 0.49  |
| A013872_01 | At4g38770 | extensin - like protein; protein | 0 | -1.19 | -1.53 | -1.63 | -2.10 | -2.68 | -2.30 | 0.8 | 0.66 | 2.77  | -0.01 |
| A013903_01 | At4g31290 | unknown protein; protein id: A   | 0 | 0.40  | -0.76 | -1.07 | -1.96 | -1.97 | -1.83 | 1.3 | 0.06 | 2.38  | 1.03  |
| A013911_01 | At4g32710 | putative protein kinase; protei  | 0 | -1.24 | -1.88 | -2.25 | -2.93 | -2.38 | NA    | 0.9 | 0.31 | NA    | NA    |
| A013951_01 | At4g04960 | unknown protein; protein id: A   | 0 | 0.67  | 0.90  | 0.94  | 0.95  | 0.85  | 1.02  | 1.3 | 0.06 | -1.90 | 0.49  |
| A013980_01 | At4g35290 | putative protein; protein id: At | 0 | 0.41  | 0.78  | 0.94  | 1.07  | 1.24  | 1.09  | 0.9 | 0.26 | -1.98 | -0.50 |

|            |           |                                  |   |       |       |       |       |       |       |     |      |       |       |
|------------|-----------|----------------------------------|---|-------|-------|-------|-------|-------|-------|-----|------|-------|-------|
| A013989_01 | At5g45775 | expressed protein; protein id:   | 0 | -0.57 | -1.03 | -0.94 | -1.68 | -1.79 | -1.84 | 1.4 | 0.06 | 2.73  | 0.39  |
| A013995_01 | At4g24230 | putative protein; protein id: At | 0 | 1.97  | 1.30  | 0.90  | 0.37  | 0.74  | 0.09  | 1.4 | 0.06 | 0.36  | 2.06  |
| A013998_01 | At4g39620 | putative protein; protein id: At | 0 | -0.41 | -0.58 | -0.73 | -0.81 | -0.86 | -1.12 | 1.0 | 0.16 | 2.77  | 0.08  |
| A014017_01 | At4g10380 | major intrinsic protein (MIP) -  | 0 | -0.97 | -0.46 | 0.53  | 1.24  | 1.56  | 2.27  | 1.7 | 0.06 | -1.21 | -2.02 |
| A014031_01 | At4g26700 | fimbrin-like protein (ATFIM1);   | 0 | 1.13  | 1.32  | 1.20  | 1.31  | 1.50  | 1.47  | 1.3 | 0.06 | -1.96 | 0.45  |
| A014040_01 | At4g11320 | cysteine proteinase; protein ic  | 0 | -3.89 | -4.48 | -3.54 | -4.54 | -4.33 | -5.08 | 1.2 | 0.06 | 2.65  | -1.08 |
| A014046_01 | At4g25000 | alpha-amylase - like protein; p  | 0 | 1.30  | 1.69  | 1.74  | 1.79  | 1.98  | 2.10  | 1.2 | 0.06 | -2.03 | 0.20  |
| A014056_01 | At4g30210 | NADPH-ferrihemoprotein redi      | 0 | 0.33  | 0.80  | 0.99  | 1.17  | 1.09  | 1.04  | 0.9 | 0.27 | -1.92 | -0.47 |
| A014066_01 | At4g23880 | hypothetical protein; protein ic | 0 | 2.24  | 1.89  | 1.90  | 1.88  | 1.65  | 1.59  | 0.9 | 0.48 | -1.35 | 1.40  |
| A014068_01 | At4g23870 | putative protein                 | 0 | 1.27  | -0.05 | -0.31 | -0.72 | -1.25 | -1.49 | 0.9 | 0.48 | 1.91  | 1.45  |
| A014072_01 | At4g16520 | AtAPG8f; symbiosis-related li    | 0 | 1.16  | 1.17  | 1.15  | 1.38  | 1.35  | 1.35  | 1.1 | 0.10 | -1.92 | 0.53  |
| A014075_01 | At4g00490 | glycosyl hydrolase family 14 (   | 0 | -0.71 | -0.81 | -1.11 | -1.43 | -1.42 | -1.61 | 1.1 | 0.14 | 2.78  | 0.17  |
| A014086_01 | At4g27900 | putative protein; protein id: At | 0 | -0.97 | -1.69 | -0.98 | -1.19 | -1.33 | -1.25 | 1.7 | 0.06 | 2.37  | -1.30 |
| A014097_01 | At4g22920 | expressed protein; protein id:   | 0 | 2.19  | 2.41  | 2.48  | 2.48  | 2.41  | 3.51  | 1.4 | 0.06 | -1.93 | 0.37  |
| A014115_01 | At4g28040 | Medicago nodulin N21-like pr     | 0 | 2.70  | 2.71  | 2.27  | 1.11  | 1.32  | 0.96  | 0.7 | 1.61 | -0.27 | 2.10  |
| A014124_01 | At4g27800 | protein phosphatase homolog      | 0 | 0.72  | 0.93  | 1.03  | 1.23  | 1.07  | 0.98  | 0.7 | 1.61 | -1.92 | 0.26  |
| A014126_01 | At4g28025 | expressed protein; protein id:   | 0 | 1.09  | 1.06  | 0.94  | 1.19  | 1.14  | 0.98  | 1.0 | 0.16 | -1.72 | 0.87  |
| A014131_01 | At4g14040 | selenium-binding protein like;   | 0 | 1.14  | 0.75  | 1.06  | 1.28  | 1.83  | 2.25  | 0.7 | 2.21 | -1.63 | -0.65 |
| A014132_01 | At4g38225 | expressed protein; protein id:   | 0 | 0.49  | 0.77  | 0.91  | 1.03  | 1.18  | 1.06  | 0.8 | 0.66 | -2.03 | -0.36 |
| A014136_01 | At4g24750 | putative protein; protein id: At | 0 | -0.46 | -0.79 | -0.73 | -0.65 | -0.75 | -1.22 | 0.8 | 0.48 | 2.58  | -0.41 |
| A014139_01 | At4g20130 | hypothetical protein; protein ic | 0 | -0.53 | -0.93 | -0.88 | -0.83 | -1.03 | -1.28 | 0.8 | 0.96 | 2.72  | -0.35 |
| A014146_01 | At4g39170 | SEC14 - like protein; protein i  | 0 | -1.06 | -1.13 | -1.01 | -1.04 | -0.99 | -1.14 | 0.8 | 0.96 | 2.48  | -1.45 |
| A014147_01 | At4g36400 | actin interacting protein; prote | 0 | 1.20  | 1.01  | 0.85  | 0.28  | 0.97  | 0.56  | 0.7 | 0.96 | -0.55 | 1.64  |
| A014161_01 | At4g36760 | aminopeptidase-like protein; p   | 0 | 1.45  | 1.38  | 1.11  | 0.95  | 0.81  | 1.18  | 0.8 | 0.81 | -1.12 | 1.68  |
| A014165_01 | At4g30790 | putative protein; protein id: At | 0 | 1.04  | 1.04  | 0.91  | 0.87  | 0.66  | 1.33  | 1.2 | 0.06 | -1.49 | 0.92  |
| A014168_01 | At4g24700 | hypothetical protein; protein ic | 0 | 0.64  | 0.91  | 1.00  | 1.36  | 1.48  | 1.50  | 0.8 | 0.66 | -2.04 | -0.54 |
| A014169_01 | At4g18910 | major intrinsic protein (MIP)- I | 0 | 0.65  | -0.36 | -0.42 | -0.79 | -1.09 | -1.07 | 1.0 | 0.16 | 2.13  | 1.21  |
| A014176_01 | At4g39100 | ES43 like protein; protein id: / | 0 | 0.73  | 0.82  | 0.94  | 1.02  | 1.19  | 1.02  | 0.9 | 0.31 | -2.00 | 0.09  |
| A014182_01 | At4g11820 | hydroxymethylglutaryl-CoA sy     | 0 | -0.93 | -1.14 | -1.13 | -1.22 | -1.53 | -1.34 | 1.1 | 0.14 | 2.73  | -0.61 |
| A014186_01 | At4g36730 | G-box-binding factor 1; protei   | 0 | 1.45  | 0.89  | 0.58  | 0.43  | 0.17  | 0.16  | 0.6 | 4.47 | 0.42  | 2.17  |
| A014189_01 | At4g39210 | glucose-1-phosphate adenyly      | 0 | -1.03 | -0.88 | -0.58 | -0.08 | -0.06 | -0.33 | 0.6 | 2.21 | 0.39  | -2.57 |
| A014205_01 | At4g38840 | auxin-induced protein - like; p  | 0 | 0.64  | 0.90  | 0.74  | 0.55  | 0.49  | -0.05 | 0.7 | 1.20 | -0.09 | 1.56  |
| A014208_01 | At4g38890 | putative protein; protein id: At | 0 | -0.86 | -0.88 | -0.80 | -0.91 | -0.78 | -1.06 | 0.7 | 1.20 | 2.57  | -1.18 |
| A014213_01 | At4g27090 | ribosomal protein L14 -like pr   | 0 | -0.66 | -0.93 | -0.90 | -1.42 | -1.47 | -1.52 | 0.9 | 0.31 | 2.79  | 0.11  |
| A014224_01 | At4g09890 | putative protein; protein id: At | 0 | 0.71  | 1.31  | 1.72  | 1.77  | 1.60  | 1.88  | 0.8 | 0.55 | -1.96 | -0.26 |
| A014247_01 | At4g10270 | probable wound-induced prot      | 0 | -2.47 | -2.96 | -3.07 | -2.92 | -2.41 | -2.09 | 0.8 | 0.81 | 2.22  | -1.58 |
| A014256_01 | At4g10480 | putative alpha NAC; protein ic   | 0 | -0.47 | -0.60 | -0.68 | -1.26 | -1.81 | -1.58 | 0.6 | 2.21 | 2.58  | 0.67  |
| A014274_01 | At4g12830 | hydrolase-like protein; protein  | 0 | 1.39  | 2.05  | 2.11  | 2.43  | 2.45  | 2.08  | 1.7 | 0.06 | -1.94 | 0.18  |
| A014275_01 | At4g12890 | putative protein; protein id: At | 0 | -3.59 | -4.71 | -2.75 | -4.74 | -4.78 | -5.12 | 1.2 | 0.06 | 2.72  | -0.85 |
| A014276_01 | At4g13530 | putative protein; protein id: At | 0 | 1.51  | 1.59  | 1.51  | 1.43  | 1.04  | 1.70  | 0.7 | 0.96 | -1.55 | 1.15  |
| A014286_01 | At4g27070 | tryptophan synthase beta-sub     | 0 | -0.48 | -0.72 | -0.73 | -1.14 | -1.12 | -0.96 | 0.8 | 0.66 | 2.71  | -0.07 |
| A014293_01 | At4g29780 | expressed protein; protein id:   | 0 | 0.86  | 1.20  | 1.08  | 0.38  | 0.38  | 0.40  | 0.6 | 4.47 | -0.18 | 1.81  |
| A014295_01 | At4g11570 | putative protein; protein id: At | 0 | 1.44  | 1.59  | 1.58  | 1.36  | 1.43  | 1.69  | 1.1 | 0.06 | -1.75 | 0.96  |
| A014304_01 | At4g29110 | putative protein; protein id: At | 0 | 1.15  | 2.41  | 2.66  | 3.20  | 2.70  | 2.26  | 0.7 | 2.21 | -1.77 | -0.02 |

|            |           |                                    |   |       |       |       |       |       |       |     |      |       |       |
|------------|-----------|------------------------------------|---|-------|-------|-------|-------|-------|-------|-----|------|-------|-------|
| A014310_01 | At4g39400 | brassinosteroid insensitive 1 (    | 0 | 0.17  | -0.10 | -0.35 | -0.90 | -2.03 | -1.72 | 1.5 | 0.06 | 2.16  | 1.27  |
| A014457_01 | At4g31510 | putative protein; protein id: At   | 0 | 1.26  | 1.00  | 0.93  | 1.16  | 1.46  | 1.20  | 0.9 | 0.31 | -1.70 | 0.49  |
| A014463_01 | At4g15940 | isomerase like protein; protein    | 0 | 0.48  | 0.52  | 0.45  | 0.55  | 0.66  | 1.00  | 0.8 | 0.66 | -1.83 | -0.22 |
| A014464_01 | At4g03210 | xyloglucan endotransglycosyl       | 0 | -2.13 | -3.51 | -3.00 | -4.76 | -4.96 | -4.32 | 1.7 | 0.06 | 2.75  | -0.13 |
| A014469_01 | At4g28490 | leucine-rich repeat transmem       | 0 | 1.91  | 2.39  | 2.26  | 2.48  | 2.41  | 3.12  | 1.1 | 0.14 | -1.99 | 0.34  |
| A014474_01 | At4g08500 | MEKK1/MAP kinase kinase k          | 0 | 0.57  | 0.93  | 0.81  | 0.78  | 0.88  | 1.19  | 0.8 | 0.66 | -1.94 | 0.17  |
| A014509_01 | At4g29070 | expressed protein; protein id:     | 0 | 0.83  | 1.10  | 1.30  | 1.03  | 0.50  | 0.99  | 0.7 | 1.61 | -1.24 | 1.13  |
| A014519_01 | At4g04460 | putative aspartic protease; pr     | 0 | 1.77  | 2.30  | 2.44  | 2.73  | 1.98  | 2.55  | 1.1 | 0.10 | -1.85 | 0.53  |
| A014526_01 | At4g14930 | expressed protein; protein id:     | 0 | 2.68  | 1.91  | 1.22  | 0.33  | 0.08  | 0.61  | 0.7 | 1.20 | 0.49  | 2.15  |
| A014531_01 | At4g18040 | translation initiation factor eIF  | 0 | -0.72 | -0.77 | -0.78 | -1.05 | -0.90 | -0.99 | 0.9 | 0.31 | 2.73  | -0.65 |
| A014539_01 | At4g16130 | galactokinase like protein; pro    | 0 | 1.04  | 0.53  | 0.59  | 1.09  | 1.18  | 0.90  | 0.8 | 0.66 | -1.55 | 0.13  |
| A014544_01 | At4g25880 | putative pumilio protein           | 0 | -0.02 | 0.16  | 0.59  | 0.71  | 0.85  | 1.11  | 0.7 | 0.96 | -1.66 | -1.52 |
| A014570_01 | At4g10320 | isoleucine-tRNA ligase - like p    | 0 | -0.19 | -0.26 | -0.42 | -0.70 | -1.05 | -0.61 | 0.9 | 0.31 | 2.36  | 0.74  |
| A014571_01 | At4g28270 | putative protein; protein id: At   | 0 | 1.23  | 1.56  | 1.82  | 2.19  | 2.29  | 2.05  | 1.1 | 0.14 | -2.02 | -0.13 |
| A014577_01 | At4g02930 | mitochondrial elongation fact      | 0 | -1.75 | -1.95 | -1.70 | -2.40 | -2.63 | -2.56 | 1.5 | 0.06 | 2.77  | -0.47 |
| A014581_01 | At4g30530 | putative protein; protein id: At   | 0 | -0.04 | 0.60  | 0.95  | 1.07  | 1.34  | 2.17  | 1.2 | 0.06 | -1.68 | -1.26 |
| A014611_01 | At4g01070 | putative flavonol glucosyltrans    | 0 | 0.71  | 1.39  | 1.87  | 2.26  | 2.35  | 2.94  | 0.9 | 0.31 | -1.98 | -0.82 |
| A014612_01 | At4g13010 | putative protein; protein id: At   | 0 | 0.71  | 1.00  | 1.04  | 1.18  | 1.17  | 1.39  | 0.8 | 0.66 | -2.04 | -0.01 |
| A014615_01 | At4g25740 | putative ribosomal protein S1      | 0 | -0.69 | -0.92 | -0.92 | -1.29 | -1.40 | -1.60 | 0.9 | 0.27 | 2.81  | 0.02  |
| A014622_01 | At4g27990 | A.t. histone deacetylase mRN       | 0 | 0.41  | 0.94  | 0.94  | 1.09  | 1.27  | 1.01  | 1.3 | 0.06 | -1.93 | -0.31 |
| A014632_01 | At4g34620 | putative ribosomal protein S1      | 0 | -0.63 | -1.03 | -1.04 | -1.37 | -1.59 | -1.67 | 0.8 | 0.48 | 2.80  | 0.11  |
| A014634_01 | At4g39730 | putative protein; protein id: At   | 0 | -1.57 | -1.29 | -1.26 | -1.68 | -1.72 | -1.75 | 0.9 | 0.27 | 2.62  | -0.84 |
| A014646_01 | At4g11960 | putative protein; protein id: At   | 0 | 0.93  | 1.08  | 1.24  | 1.37  | 1.14  | 1.25  | 0.8 | 0.96 | -1.95 | 0.40  |
| A014655_01 | At4g14420 | elicitor like protein; protein id: | 0 | -0.64 | -0.85 | -0.82 | -1.13 | -1.28 | -1.45 | 1.1 | 0.10 | 2.81  | 0.01  |
| A014667_01 | At4g27390 | putative protein; protein id: At   | 0 | 0.19  | 0.63  | 0.80  | 1.29  | 1.27  | 1.27  | 1.3 | 0.06 | -1.88 | -1.08 |
| A014688_01 | At4g37610 | putative protein; protein id: At   | 0 | 2.61  | 2.59  | 2.07  | 0.90  | 0.56  | 0.68  | 0.8 | 0.55 | 0.12  | 2.17  |
| A014702_01 | At4g33050 | putative protein; protein id: At   | 0 | 2.32  | 2.91  | 2.75  | 2.82  | 2.79  | 3.17  | 1.6 | 0.06 | -1.90 | 0.64  |
| A014705_01 | At4g35750 | putative protein; protein id: At   | 0 | 1.46  | 1.72  | 2.25  | 2.35  | 2.30  | 2.97  | 1.0 | 0.20 | -2.05 | -0.21 |
| A014706_01 | At4g15770 | hypothetical protein; protein ic   | 0 | -0.93 | -0.82 | -0.63 | -1.10 | -1.13 | -1.18 | 1.0 | 0.14 | 2.62  | -0.57 |
| A014716_01 | At4g13940 | adenosylhomocysteinase; pro        | 0 | -0.90 | -1.08 | -0.95 | -1.04 | -1.25 | -1.30 | 0.9 | 0.27 | 2.73  | -0.73 |
| A014721_01 | At4g11010 | nucleoside diphosphate kinas       | 0 | -1.11 | -1.11 | -1.16 | -1.32 | -1.45 | -1.62 | 1.0 | 0.26 | 2.74  | -0.55 |
| A014733_01 | At4g16830 | nuclear antigen homolog; pro       | 0 | 0.79  | 0.88  | 0.93  | 1.05  | 0.61  | 0.82  | 0.8 | 0.96 | -1.51 | 1.00  |
| A014746_01 | At4g27960 | E2, ubiquitin-conjugating enzy     | 0 | 0.08  | 0.89  | 0.94  | 1.31  | 1.22  | 1.58  | 0.7 | 2.21 | -1.85 | -0.94 |
| A014750_01 | At4g39330 | cinnamyl-alcohol dehydrogen        | 0 | -1.18 | -1.37 | -1.24 | -1.97 | -2.99 | -2.55 | 1.2 | 0.06 | 2.67  | 0.25  |
| A014758_01 | At4g35770 | senescence-associated prote        | 0 | 3.33  | 3.08  | 2.92  | 2.30  | 2.31  | 2.42  | 0.9 | 0.41 | -1.21 | 1.65  |
| A014759_01 | xxxx      | b/t disease resistance protein     | 0 | 0.21  | 0.97  | 1.12  | 1.32  | 1.59  | 1.84  | 0.8 | 0.81 | -1.90 | -0.92 |
| A014765_01 | At4g17080 | hypothetical protein; protein ic   | 0 | 1.01  | 1.03  | 1.27  | 1.32  | 1.29  | 1.35  | 0.8 | 0.81 | -2.00 | 0.31  |
| A014769_01 | At4g02380 | coded for by A. thaliana cDN/      | 0 | 1.28  | 1.35  | 1.12  | 0.90  | 1.19  | 1.73  | 1.2 | 0.06 | -1.63 | 0.77  |
| A014771_01 | At4g00100 | putative ribosomal protein S1      | 0 | -0.49 | -0.79 | -0.78 | -1.35 | -1.46 | -1.21 | 0.7 | 1.20 | 2.70  | 0.28  |
| A014799_01 | At4g02290 | glycosyl hydrolase family 9; p     | 0 | -3.01 | -4.12 | -1.89 | NA    | -3.76 | -3.98 | 1.5 | 0.06 | NA    | NA    |
| A014801_01 | At4g25620 | unknown protein; protein id: A     | 0 | 1.05  | 1.00  | 0.69  | -0.01 | -0.34 | -0.04 | 0.9 | 0.37 | 0.84  | 2.08  |
| A014802_01 | At4g24660 | putative protein; protein id: At   | 0 | 1.01  | 0.81  | 0.73  | 0.29  | 0.39  | 0.40  | 0.8 | 0.55 | -0.18 | 2.12  |
| A014835_01 | At4g30630 | putative protein; protein id: At   | 0 | 0.77  | 0.79  | 0.92  | 0.86  | 1.00  | 1.00  | 0.8 | 0.81 | -1.98 | 0.37  |
| A014838_01 | At4g23740 | leucine-rich repeat transmem       | 0 | -0.96 | -1.06 | -0.92 | -0.89 | -0.86 | -0.93 | 1.1 | 0.14 | 2.33  | -1.65 |

|            |           |                                     |   |       |       |       |       |       |       |     |      |       |       |
|------------|-----------|-------------------------------------|---|-------|-------|-------|-------|-------|-------|-----|------|-------|-------|
| A014842_01 | At4g26860 | putative proline synthetase as      | 0 | 0.74  | 0.75  | 0.84  | 1.02  | 1.25  | 1.13  | 0.9 | 0.27 | -2.01 | -0.09 |
| A014855_01 | At4g34320 | hypothetical protein common         | 0 | 2.41  | 2.57  | 2.08  | 2.15  | 1.58  | 2.37  | 1.1 | 0.10 | -1.43 | 1.35  |
| A014858_01 | At4g33666 | expressed protein; protein id:      | 0 | 1.86  | 2.23  | 2.07  | 2.52  | 2.45  | 2.09  | 2.4 | 0.06 | -1.87 | 0.57  |
| A014867_01 | At4g36740 | homeodomain protein; proteir        | 0 | 2.89  | 1.83  | 1.90  | -0.81 | -0.39 | 0.02  | 0.7 | 1.20 | 1.00  | 1.99  |
| A014876_01 | At4g11330 | MAP kinase (ATMPK5); prote          | 0 | 0.57  | 1.44  | 2.03  | 2.46  | 2.72  | 2.69  | 0.8 | 0.81 | -1.94 | -0.88 |
| A014904_01 | At4g02150 | AtKAP alpha; protein id: At4g       | 0 | -0.57 | -0.68 | -0.67 | -1.04 | -1.11 | -1.03 | 1.1 | 0.10 | 2.79  | -0.09 |
| A014914_01 | At4g39710 | FKBP-type peptidyl-prolyl cis-      | 0 | 0.07  | -0.05 | -0.43 | -0.38 | -0.63 | -1.36 | 0.8 | 0.48 | 2.12  | 1.02  |
| A014919_01 | At4g38060 | putative protein; protein id: At    | 0 | 1.33  | 1.09  | 1.17  | 0.79  | 0.33  | 1.09  | 0.6 | 4.47 | -0.73 | 1.71  |
| A014927_01 | At4g03290 | putative calmodulin; protein ic     | 0 | 0.49  | 0.72  | 1.15  | 1.14  | 0.97  | 1.63  | 0.7 | 2.21 | -1.88 | -0.52 |
| A014928_01 | At4g03320 | putative chloroplast protein ir     | 0 | 0.97  | 0.98  | 1.01  | 0.79  | 1.17  | 1.68  | 0.8 | 0.96 | -1.71 | 0.09  |
| A014929_01 | At4g25650 | putative protein; protein id: At    | 0 | 0.52  | 0.94  | 0.86  | 1.25  | 1.36  | 1.27  | 1.0 | 0.16 | -2.03 | -0.44 |
| A014932_01 | At4g28030 | unknown protein; protein id: A      | 0 | 0.96  | 1.07  | 0.79  | 0.96  | 1.03  | 0.84  | 0.9 | 0.37 | -1.63 | 1.06  |
| A014936_01 | At4g36410 | E2, ubiquitin-conjugating enzy      | 0 | 1.17  | 1.52  | 1.42  | 0.97  | 0.86  | 0.95  | 0.8 | 0.81 | -1.05 | 1.61  |
| A014939_01 | At4g25900 | possible apospory-associatec        | 0 | 0.57  | 1.08  | 1.41  | 1.68  | 1.73  | 1.81  | 1.9 | 0.06 | -2.01 | -0.64 |
| A014945_01 | At4g14680 | ATP-sulfurylase; protein id: A      | 0 | -0.88 | -0.79 | -0.23 | 0.38  | 0.55  | 1.31  | 0.7 | 1.61 | -0.81 | -2.19 |
| A014947_01 | At4g03510 | E3 ubiquitin ligase, RMA1; pr       | 0 | 1.61  | 1.26  | 1.37  | 1.37  | 1.55  | 1.46  | 0.7 | 0.96 | -1.61 | 0.76  |
| A014948_01 | At4g28060 | putative protein; protein id: At    | 0 | -0.34 | -0.11 | 0.06  | 0.46  | 0.65  | 1.03  | 0.7 | 2.21 | -1.22 | -1.93 |
| A014955_01 | At4g27480 | N-acetylglucosaminyltransfer        | 0 | 0.76  | 1.08  | 1.05  | 1.18  | 1.51  | 1.37  | 1.1 | 0.10 | -2.03 | -0.12 |
| A014976_01 | At4g08180 | putative protein; protein id: At    | 0 | 0.61  | 0.84  | 0.87  | 0.82  | 1.09  | 1.25  | 0.7 | 1.20 | -2.01 | -0.10 |
| A014984_01 | At4g05070 | coded for by A. thaliana cDNA       | 0 | 1.96  | 1.74  | 1.94  | 1.87  | 1.42  | 1.40  | 0.7 | 1.61 | -1.35 | 1.41  |
| A015009_01 | At4g04930 | putative fatty acid desaturase      | 0 | 0.08  | 0.40  | 0.79  | 0.74  | 0.76  | 1.16  | 0.8 | 0.81 | -1.79 | -1.05 |
| A015013_01 | At4g24990 | expressed protein; protein id:      | 0 | 0.78  | 0.95  | 1.10  | 1.42  | 1.53  | 1.83  | 1.2 | 0.06 | -2.04 | -0.51 |
| A015047_01 | At4g24380 | putative protein; protein id: At    | 0 | -0.39 | -0.28 | -0.33 | -0.81 | -1.15 | -0.63 | 0.7 | 2.21 | 2.27  | 0.51  |
| A015062_01 | At4g38470 | protein kinase like protein; pr     | 0 | 1.80  | 1.53  | 1.12  | 0.73  | 0.57  | 0.56  | 0.7 | 1.61 | -0.08 | 2.19  |
| A015071_01 | At4g25100 | iron superoxide dismutase (F        | 0 | 1.07  | 1.62  | 1.95  | 2.64  | 2.44  | 2.21  | 0.6 | 4.47 | -1.98 | -0.39 |
| A015072_01 | At4g39200 | ribosomal protein S25; proteir      | 0 | -0.36 | -0.80 | -0.81 | -1.23 | -1.72 | -1.51 | 1.0 | 0.20 | 2.67  | 0.52  |
| A015077_01 | At4g26110 | nucleosome assembly proteir         | 0 | -0.46 | -0.65 | -0.53 | -0.94 | -0.97 | -1.17 | 0.9 | 0.31 | 2.76  | 0.16  |
| A015084_01 | At4g34390 | extra-large G-protein - like; pr    | 0 | 0.84  | 1.23  | 1.13  | 1.04  | 0.76  | 1.33  | 1.3 | 0.06 | -1.65 | 0.80  |
| A015095_01 | At4g23820 | polygalacturonase, putative; p      | 0 | -0.80 | -2.17 | -2.52 | -3.13 | -3.22 | -3.51 | 0.7 | 1.20 | 2.72  | 0.29  |
| A015105_01 | At4g04955 | expressed protein; protein id:      | 0 | 1.22  | 1.47  | 1.83  | 2.21  | 2.04  | 2.51  | 1.0 | 0.20 | -2.05 | -0.27 |
| A015108_01 | At4g02530 | chloroplast thylakoid lumen pi      | 0 | -0.28 | -0.42 | -0.56 | -0.79 | -0.84 | -1.02 | 0.7 | 1.61 | 2.71  | 0.50  |
| A015134_01 | At4g22710 | cytochrome p450 family; prote       | 0 | 1.05  | 2.07  | 2.26  | 2.59  | 2.60  | 2.46  | 1.2 | 0.06 | -1.97 | -0.22 |
| A015144_01 | At4g26780 | grpE like protein; protein id: A    | 0 | -1.80 | -1.39 | -1.07 | -1.26 | -1.30 | -1.44 | 0.8 | 0.66 | 2.10  | -1.67 |
| A015147_01 | At4g07410 | unknown protein; protein id: A      | 0 | -0.40 | -0.68 | -0.66 | -1.09 | -1.05 | -1.06 | 0.6 | 4.47 | 2.76  | 0.20  |
| A015167_01 | At4g31390 | similar to putative ABC transp      | 0 | 1.47  | 1.95  | 1.76  | 0.94  | 2.14  | 1.48  | 0.7 | 2.21 | -1.37 | 0.90  |
| A015181_01 | At4g31460 | putative protein; protein id: At    | 0 | -0.57 | -0.93 | -0.86 | -1.10 | -1.17 | -1.19 | 1.1 | 0.06 | 2.79  | -0.27 |
| A015182_01 | At4g13830 | DnaJ-like protein; protein id: A    | 0 | 1.55  | 2.12  | 2.23  | 2.51  | 2.47  | 2.55  | 1.4 | 0.06 | -2.03 | 0.14  |
| A015235_01 | At4g25630 | fibrillarlin 2 (AtFib2); protein id | 0 | -1.71 | -1.87 | -1.45 | -3.01 | -2.37 | -2.49 | 0.8 | 0.66 | 2.68  | -0.39 |
| A015240_01 | At4g30220 | snRNP Sm protein F - like; pr       | 0 | -1.30 | -1.17 | -1.07 | -1.42 | -1.46 | -1.63 | 1.1 | 0.06 | 2.68  | -0.79 |
| A015249_01 | At4g35060 | copper chaperone (CCH)-rela         | 0 | 1.04  | 1.65  | 1.98  | 2.06  | 1.98  | 2.60  | 1.5 | 0.06 | -2.01 | -0.23 |
| A015260_01 | At4g16370 | isp4 like protein; protein id: At   | 0 | 0.94  | 1.47  | 1.22  | 1.34  | 1.09  | 1.11  | 0.9 | 0.27 | -1.60 | 0.93  |
| A015279_01 | At4g16690 | cyanohydrin lyase like protein      | 0 | 1.47  | 1.25  | 0.88  | 0.53  | 0.91  | 1.48  | 1.0 | 0.16 | -1.03 | 1.21  |
| A015286_01 | At4g31985 | expressed protein; protein id:      | 0 | -0.77 | -0.82 | -0.79 | -1.25 | -1.56 | -1.49 | 1.1 | 0.10 | 2.74  | 0.10  |
| A015294_01 | At4g19985 | expressed protein; protein id:      | 0 | -0.23 | -0.42 | -0.53 | -0.76 | -0.73 | -1.14 | 1.0 | 0.18 | 2.61  | 0.55  |

|            |           |                                    |   |       |       |       |       |       |       |     |      |       |       |
|------------|-----------|------------------------------------|---|-------|-------|-------|-------|-------|-------|-----|------|-------|-------|
| A015301_01 | At4g25770 | putative protein; protein id: At   | 0 | 0.30  | 0.53  | 0.62  | 1.05  | 0.80  | 0.98  | 0.8 | 0.96 | -1.93 | -0.72 |
| A015302_01 | At4g18730 | ribosomal protein L11, cytosol     | 0 | -0.37 | -0.79 | -0.74 | -1.37 | -1.37 | -1.58 | 0.8 | 0.66 | 2.70  | 0.50  |
| A015313_01 | At4g31240 | similar to putative receptor kin   | 0 | 1.17  | 1.10  | 1.09  | 0.95  | 1.06  | 1.61  | 0.6 | 2.21 | -1.70 | 0.56  |
| A015331_01 | At4g24040 | glycosyl hydrolase family 37 (     | 0 | 1.42  | 0.92  | 0.50  | 0.14  | -0.09 | 0.01  | 1.0 | 0.16 | 0.80  | 2.15  |
| A015336_01 | At4g32150 | synaptobrevin-like protein; pro    | 0 | 1.02  | 0.89  | 0.99  | 0.91  | 1.09  | 1.11  | 0.7 | 2.21 | -1.83 | 0.68  |
| A015339_01 | At4g00780 | coded for by A. thaliana cDNA      | 0 | 1.59  | 2.28  | 2.73  | 3.41  | 3.29  | 4.09  | 1.2 | 0.06 | -2.04 | -0.50 |
| A015345_01 | At4g00870 | bHLH protein; protein id: At4g     | 0 | 0.35  | -1.04 | -1.59 | -3.08 | -3.32 | -2.84 | 1.5 | 0.06 | 2.41  | 0.95  |
| A015351_01 | At4g28240 | putative wound induced prote       | 0 | 1.53  | 1.31  | 1.53  | 1.79  | 1.68  | 1.81  | 0.7 | 2.21 | -1.92 | 0.40  |
| A015378_01 | At4g32190 | putative protein; protein id: At   | 0 | 0.29  | 0.62  | 0.74  | 0.91  | 0.92  | 1.09  | 1.1 | 0.14 | -1.99 | -0.64 |
| A015380_01 | At4g15160 | cell wall protein like; protein ic | 0 | -0.92 | -0.21 | 0.44  | 1.15  | 1.37  | 1.01  | 1.7 | 0.06 | -1.18 | -2.01 |
| A015422_01 | At4g36530 | putative protein; protein id: At   | 0 | 0.37  | 0.86  | 0.86  | 1.09  | 1.14  | 1.14  | 0.7 | 1.61 | -1.99 | -0.44 |
| A015439_01 | At4g36790 | putative protein; protein id: At   | 0 | 0.56  | 0.55  | 0.82  | 1.30  | 1.41  | 1.41  | 1.6 | 0.06 | -1.88 | -0.91 |
| A015442_01 | At4g36840 | putative protein; protein id: At   | 0 | 0.08  | 0.16  | 0.57  | 0.77  | 1.06  | 0.90  | 0.7 | 1.61 | -1.69 | -1.39 |
| A015444_01 | At4g33680 | putative protein; protein id: At   | 0 | -0.96 | -0.96 | -0.80 | -0.88 | -1.08 | -1.11 | 0.8 | 0.48 | 2.59  | -1.10 |
| A015447_01 | At4g36930 | bHLH protein, SPATULA; pro         | 0 | 0.64  | 1.07  | 1.39  | 1.27  | 1.59  | 2.05  | 1.2 | 0.06 | -1.98 | -0.55 |
| A015448_01 | At4g18740 | hypothetical protein; protein ic   | 0 | 0.75  | 1.09  | 1.03  | 1.33  | 1.51  | 1.29  | 0.7 | 1.20 | -2.02 | -0.14 |
| A015463_01 | At4g37980 | cinnamyl-alcohol dehydrogen        | 0 | 0.05  | -0.92 | -0.95 | -1.13 | -1.04 | -0.53 | 1.1 | 0.14 | 1.99  | -0.05 |
| A015464_01 | At4g37240 | putative protein; protein id: At   | 0 | -0.59 | -0.72 | -0.99 | -1.79 | -2.06 | -1.93 | 1.2 | 0.06 | 2.65  | 0.62  |
| A015465_01 | At4g37260 | myb DNA-binding protein (AtM       | 0 | 1.13  | 0.72  | 0.36  | -0.15 | -0.53 | -0.53 | 1.4 | 0.06 | 1.33  | 2.04  |
| A015472_01 | At4g36680 | salt-inducible like protein; pro   | 0 | -1.22 | -1.63 | -1.30 | -1.85 | -1.97 | -1.80 | 1.2 | 0.06 | 2.76  | -0.58 |
| A015475_01 | At4g16630 | DEAD/DEAH box RNA helica           | 0 | -0.80 | -0.98 | -0.82 | -1.42 | -1.35 | -1.10 | 0.9 | 0.31 | 2.66  | -0.37 |
| A015483_01 | At4g03050 | putative oxidoreductase; prot      | 0 | -1.08 | -0.18 | 1.64  | 1.62  | 1.75  | 3.14  | 1.2 | 0.06 | -1.32 | -1.86 |
| A015484_01 | At4g09320 | nucleoside-diphosphate kinas       | 0 | -0.94 | -1.04 | -0.89 | -1.53 | -1.48 | -1.30 | 0.9 | 0.27 | 2.72  | -0.39 |
| A015487_01 | At4g29880 | putative protein; protein id: At   | 0 | 0.08  | 0.60  | 0.80  | 0.84  | 1.14  | 1.13  | 0.7 | 1.20 | -1.85 | -1.08 |
| A015492_01 | At4g36360 | glycosyl hydrolase family 35 (     | 0 | -1.72 | -2.08 | -2.13 | -2.59 | -2.85 | -2.13 | 0.7 | 2.21 | 2.66  | -0.62 |
| A015498_01 | At5g10930 | serine/threonine protein kinas     | 0 | 1.33  | 1.78  | 2.36  | 2.40  | 2.65  | 3.12  | 1.0 | 0.20 | -2.05 | -0.39 |
| A015504_01 | At5g11090 | putative protein; protein id: At   | 0 | 0.69  | 1.31  | 1.77  | 1.68  | 1.68  | 2.06  | 0.7 | 1.20 | -2.01 | -0.40 |
| A015508_01 | At5g62770 | putative protein; protein id: At   | 0 | 0.55  | 0.84  | 1.32  | 1.61  | 1.55  | 1.73  | 0.6 | 4.47 | -1.99 | -0.77 |
| A015510_01 | At5g62750 | putative protein; protein id: At   | 0 | 0.61  | 0.89  | 1.46  | 1.61  | 1.62  | 2.23  | 1.0 | 0.16 | -1.94 | -0.76 |
| A015524_01 | At5g08280 | hydroxymethylbilane synthase       | 0 | -0.62 | -0.84 | -0.86 | -0.89 | -1.10 | -1.25 | 0.6 | 4.47 | 2.79  | -0.28 |
| A015534_01 | At5g45250 | disease resistance protein RF      | 0 | 0.66  | 1.02  | 1.20  | 1.56  | 1.23  | 1.62  | 1.2 | 0.06 | -2.00 | -0.38 |
| A015540_01 | At5g53730 | hairpin-induced protein, putat     | 0 | 2.03  | 3.15  | 3.36  | 3.26  | 3.25  | 3.46  | 1.7 | 0.06 | -1.95 | 0.29  |
| A015543_01 | At5g13180 | NAM-like protein; protein id: A    | 0 | 1.61  | 1.67  | 1.87  | 1.67  | 1.76  | 2.52  | 1.0 | 0.20 | -1.91 | 0.35  |
| A015548_01 | At5g04180 | carbonate dehydratase - like       | 0 | 0.30  | 0.53  | 1.00  | 0.88  | 1.24  | 1.81  | 0.7 | 1.61 | -1.77 | -0.98 |
| A015558_01 | At5g10650 | Pspzf zinc finger protein - like   | 0 | 2.78  | 2.92  | 2.89  | 2.31  | 2.20  | 2.99  | 1.3 | 0.06 | -1.56 | 1.22  |
| A015585_01 | At5g08040 | putative protein; protein id: At   | 0 | -1.05 | -0.93 | -0.89 | -1.16 | -1.30 | -1.27 | 0.9 | 0.27 | 2.70  | -0.74 |
| A015586_01 | At5g40350 | myb family transcription facto     | 0 | -1.01 | -1.06 | -0.89 | -1.23 | -1.38 | -1.18 | 0.9 | 0.37 | 2.69  | -0.79 |
| A015595_01 | At5g40670 | putative protein; protein id: At   | 0 | 0.66  | 0.80  | 1.14  | 1.47  | 1.57  | 1.78  | 1.3 | 0.06 | -2.00 | -0.75 |
| A015629_01 | At5g16370 | AMP-binding protein; protein id    | 0 | 1.85  | 1.71  | 1.55  | 1.47  | 1.40  | 1.36  | 0.9 | 0.41 | -1.34 | 1.51  |
| A015634_01 | At5g40780 | amino acid permease; proteir       | 0 | 1.95  | 1.82  | 1.33  | 1.44  | 1.46  | 2.11  | 1.2 | 0.06 | -1.54 | 1.09  |
| A015639_01 | At5g25130 | cytochrome p450 family; prot       | 0 | 1.35  | 1.93  | 1.99  | 2.04  | 2.05  | 2.29  | 1.2 | 0.06 | -1.97 | 0.28  |
| A015641_01 | At5g63030 | glutaredoxin-like protein; prot    | 0 | 0.46  | 0.78  | 1.06  | 1.50  | 1.58  | 1.75  | 1.4 | 0.06 | -1.97 | -0.92 |
| A015647_01 | At5g10740 | protein phosphatase 2C -like       | 0 | 0.70  | 0.76  | 0.96  | 0.91  | 1.00  | 1.49  | 0.9 | 0.37 | -1.94 | -0.22 |
| A015649_01 | At5g07360 | putative amidase; protein id: /    | 0 | 0.64  | 0.97  | 1.12  | 1.16  | 1.32  | 1.39  | 1.1 | 0.06 | -2.04 | -0.20 |



|            |           |                                   |   |       |       |         |       |          |       |     |         |       |       |
|------------|-----------|-----------------------------------|---|-------|-------|---------|-------|----------|-------|-----|---------|-------|-------|
| A015653_01 | At5g37360 | putative protein; protein id: At  | 0 | 0.55  | 0.78  | 0.92    | 0.88  | 0.87     | 0.32  | 0.8 | 0.96    | -1.12 | 0.72  |
| A015658_01 | At5g03190 | putative protein; protein id: At  | 0 | 0.88  | 1.14  | 1.30    | 1.54  | 1.36     | 1.78  | 0.9 | 0.27    | -2.04 | -0.11 |
| A015660_01 | At5g04830 | expressed protein; protein id:    | 0 | 0.66  | 0.80  | 0.62    | 0.50  | 0.63     | 1.19  | 0.6 | 2.21    | -1.59 | 0.46  |
| A015663_01 | At5g62930 | putative protein; protein id: At  | 0 | -0.07 | -0.55 | -0.54   | -0.67 | -0.93    | -1.01 | 1.0 | 0.20    | 2.59  | 0.55  |
| A015679_01 | At5g39880 | putative protein; protein id: At  | 0 | 0.40  | 0.71  | 1.11    | 1.18  | 1.13     | 1.62  | 1.1 | 0.14    | -1.93 | -0.73 |
| A015707_01 | At5g48590 | putative protein; protein id: At  | 0 | 0.71  | 0.91  | 0.97    | 1.12  | 1.01     | 0.87  | 1.0 | 0.20    | -1.86 | 0.44  |
| A015723_01 | At5g17290 | AtAPG5; protein id: At5g1729      | 0 | 0.78  | 0.90  | 0.96    | 1.14  | 1.38     | 1.45  | 1.6 | 0.06    | -2.03 | -0.28 |
| A015733_01 | At5g15160 | bHLH protein; protein id: At5g    | 0 | 0.01  | 0.30  | 1.03    | 1.62  | 1.38 NA  |       | 0.7 | 1.61 NA | NA    |       |
| A015762_01 | At5g13690 | alpha-N-acetylglucosaminida:      | 0 | -0.43 | -0.76 | -0.68   | -0.61 | -0.66    | -1.16 | 0.7 | 2.21    | 2.56  | -0.42 |
| A015772_01 | At5g10560 | glycosyl hydrolase family 3; p    | 0 | -0.66 | -0.87 | -1.11   | -1.41 | -1.41 NA |       | 0.8 | 0.48 NA | NA    |       |
| A015776_01 | At5g41350 | A.t. genomic DNA, chromoso        | 0 | 0.93  | 1.16  | 1.23    | 1.11  | 0.91     | 1.43  | 0.7 | 1.61    | -1.81 | 0.65  |
| A015793_01 | At5g23420 | expressed protein; protein id:    | 0 | -2.19 | -2.60 | -2.37   | -2.48 | -2.65    | -2.23 | 1.2 | 0.06    | 2.53  | -1.26 |
| A015827_01 | At5g23890 | unknown protein; protein id: A    | 0 | -0.36 | -0.50 | -0.47   | -0.76 | -1.06    | -0.73 | 0.7 | 2.21    | 2.62  | 0.24  |
| A015837_01 | At5g62230 | putative protein; protein id: At  | 0 | -0.85 | -1.23 | -1.16   | -1.68 | -1.66    | -2.21 | 0.8 | 0.81    | 2.77  | 0.06  |
| A015840_01 | At5g62290 | putative protein; protein id: At  | 0 | -0.51 | -0.84 | -0.78   | -1.15 | -1.26    | -1.21 | 1.0 | 0.26    | 2.79  | 0.07  |
| A015841_01 | At5g20070 | putative protein; protein id: At  | 0 | -0.26 | -0.49 | -0.55   | -1.12 | -1.26    | -0.77 | 0.9 | 0.41    | 2.48  | 0.52  |
| A015860_01 | At5g44630 | terpene synthase/cyclase farr     | 0 | -3.01 | -4.51 | -3.27   | -4.93 | -4.20    | -4.41 | 2.1 | 0.06    | 2.66  | -0.85 |
| A015864_01 | At5g66590 | unknown protein; protein id: A    | 0 | -1.03 | -1.44 | -1.40   | -2.49 | -1.74 NA |       | 0.7 | 1.20 NA | NA    |       |
| A015877_01 | At5g55120 | putative protein; protein id: At  | 0 | 0.09  | -0.34 | -0.90   | -1.51 | -1.30    | -1.13 | 0.8 | 0.66    | 2.35  | 1.03  |
| A015878_01 | At5g54390 | putative protein; protein id: At  | 0 | 0.24  | 0.28  | 0.44    | 0.61  | 0.84     | 1.12  | 1.0 | 0.16    | -1.79 | -1.09 |
| A015879_01 | At5g57340 | expressed protein; protein id:    | 0 | 1.72  | 1.78  | 1.62    | 1.60  | 1.45     | 0.87  | 1.2 | 0.06    | -1.08 | 1.53  |
| A015883_01 | At5g14120 | nodulin-like protein; protein id  | 0 | 1.11  | 1.40  | 1.61    | 1.98  | 1.95     | 2.01  | 1.1 | 0.10    | -2.05 | -0.14 |
| A015895_01 | At5g48580 | FKBP-type peptidyl-prolyl cis-    | 0 | -1.02 | -1.04 | -1.06   | -1.05 | -1.45    | -1.61 | 1.0 | 0.20    | 2.72  | -0.52 |
| A015938_01 | At5g22500 | male sterility 2-like protein (er | 0 | 0.68  | 0.65  | 0.28    | -0.75 | -1.51    | -1.07 | 0.7 | 0.96    | 1.76  | 1.70  |
| A015940_01 | At5g60200 | Dof zinc finger protein; proteir  | 0 | -0.77 | -1.25 | -1.08   | -1.65 | -1.81    | -1.70 | 1.4 | 0.06    | 2.79  | -0.03 |
| A015948_01 | At5g51750 | subtilisin-like serine protease;  | 0 | -1.74 | -2.85 | -2.63   | -4.55 | -3.88    | -3.74 | 0.8 | 0.48    | 2.72  | -0.06 |
| A015963_01 | At5g64530 | putative protein; protein id: At  | 0 | 0.78  | 1.26  | 1.39    | 1.47  | 1.44     | 1.61  | 1.0 | 0.16    | -2.04 | -0.06 |
| A015973_01 | At5g58430 | leucine zipper-containing prot    | 0 | 0.75  | 1.04  | 1.03    | 1.00  | 0.76     | 0.96  | 0.7 | 1.20    | -1.67 | 0.88  |
| A015982_01 | At5g10360 | 40S ribosomal protein S6; prot    | 0 | -0.51 | -1.08 | -1.12   | -1.62 | -1.71    | -1.76 | 1.0 | 0.16    | 2.75  | 0.31  |
| A015984_01 | At5g40450 | putative protein; protein id: At  | 0 | 1.93  | 2.48  | 2.86    | 3.10  | 2.55     | 3.66  | 1.6 | 0.06    | -2.00 | 0.06  |
| A015995_01 | At5g61020 | putative protein; protein id: At  | 0 | -0.36 | -0.55 | -0.51   | -1.19 | -1.38    | -1.11 | 0.8 | 0.55    | 2.57  | 0.60  |
| A015997_01 | At5g67260 | cyclin D3;2; protein id: At5g67   | 0 | -0.80 | -1.15 | -1.11   | -1.25 | -1.27    | -1.23 | 1.2 | 0.06    | 2.72  | -0.71 |
| A016000_01 | At5g45060 | disease resistance protein (Tl    | 0 | 0.82  | 0.94  | 0.93    | 0.80  | 0.37     | 1.16  | 0.8 | 0.81    | -1.30 | 1.01  |
| A016012_01 | At5g46290 | 3-oxoacyl-(acyl-carrier-proteir   | 0 | -0.99 | -0.89 | -0.97   | -1.14 | -1.28    | -1.56 | 0.9 | 0.37    | 2.71  | -0.39 |
| A016034_01 | At5g50260 | AtCEP1; cysteine proteinase;      | 0 | 3.55  | 3.29  | 2.65    | 1.41  | 1.57     | 1.25  | 0.8 | 0.96    | -0.24 | 2.14  |
| A016048_01 | At5g63490 | putative protein; protein id: At  | 0 | 0.88  | 1.29  | 1.40    | 1.74  | 1.90     | 1.92  | 1.8 | 0.06    | -2.06 | -0.35 |
| A016055_01 | At5g07430 | pectinesterase family; protein    | 0 | 0.24  | 0.68  | 1.15    | 1.19  | 1.28     | 1.94  | 1.1 | 0.10    | -1.84 | -1.05 |
| A016062_01 | At5g16390 | biotin carboxyl carrier protein   | 0 | -0.74 | -0.91 | -0.96   | -1.04 | -0.96    | -1.24 | 0.8 | 0.81    | 2.77  | -0.63 |
| A016083_01 | At5g22880 | histone H2B like protein (emb     | 0 | -2.57 | -3.00 | -1.95   | -2.87 | -3.14    | -2.91 | 1.2 | 0.06    | 2.62  | -1.13 |
| A016120_01 | At5g10480 | putative protein phosphatase;     | 0 | -0.98 | -0.91 | -0.87   | -1.14 | -1.27    | -1.26 | 1.1 | 0.14    | 2.73  | -0.65 |
| A016127_01 | At5g23750 | putative protein; protein id: At  | 0 | 0.75  | 1.16  | 1.64 NA |       | 1.91     | 2.17  | 0.7 | 1.20 NA | NA    |       |
| A016141_01 | At5g41790 | myosin heavy chain-like prote     | 0 | 1.07  | 1.78  | 1.69    | 1.40  | 0.61     | 1.90  | 0.8 | 0.48    | -1.28 | 0.86  |
| A016148_01 | At5g49360 | xylosidase glycosyl hydrolase     | 0 | 2.68  | 2.96  | 3.00    | 2.94  | 2.98     | 3.58  | 1.2 | 0.06    | -1.93 | 0.60  |
| A016163_01 | At5g41010 | putative protein; protein id: At  | 0 | -0.79 | -0.81 | -0.62   | -0.80 | -0.92    | -1.03 | 0.6 | 2.21    | 2.64  | -0.85 |

|            |           |                                    |   |       |       |       |       |       |       |     |      |       |       |
|------------|-----------|------------------------------------|---|-------|-------|-------|-------|-------|-------|-----|------|-------|-------|
| A016172_01 | At5g62165 | MADS-box protein; protein id:      | 0 | 0.50  | 0.73  | 0.84  | 1.03  | 0.98  | 0.98  | 1.0 | 0.16 | -2.04 | -0.23 |
| A016175_01 | At5g65010 | asparagine synthetase (gbjA/       | 0 | -1.33 | -1.90 | -2.11 | -2.52 | -2.87 | -2.85 | 1.0 | 0.18 | 2.81  | -0.07 |
| A016186_01 | At5g22090 | unknown protein; protein id: A     | 0 | 0.64  | 1.14  | 1.18  | 1.37  | 1.05  | 1.68  | 0.9 | 0.26 | -1.94 | -0.11 |
| A016187_01 | At5g62300 | ribosomal protein S20 - like; p    | 0 | -0.68 | -1.01 | -1.01 | -1.55 | -1.94 | -1.84 | 0.9 | 0.31 | 2.73  | 0.34  |
| A016209_01 | At5g64260 | phi-1-like protein; protein id: A  | 0 | 1.21  | 1.24  | 0.81  | 0.60  | 0.18  | 0.07  | 1.2 | 0.06 | 0.29  | 2.15  |
| A016229_01 | At5g67030 | zeaxanthin epoxidase precurs       | 0 | 0.95  | 1.41  | 1.57  | 1.85  | 1.96  | 2.15  | 1.3 | 0.06 | -2.06 | -0.30 |
| A016238_01 | At5g54160 | O-methyltransferase 1; protei      | 0 | -0.97 | -0.39 | 0.74  | 2.23  | 2.03  | 1.38  | 0.9 | 0.41 | -1.20 | -1.82 |
| A016244_01 | At5g16120 | lipase-like protein; protein id:   | 0 | 1.41  | 1.02  | 1.04  | 1.10  | 1.32  | 1.29  | 1.3 | 0.06 | -1.65 | 0.81  |
| A016247_01 | At5g54110 | membrane associated proteir        | 0 | 0.91  | 0.92  | 0.83  | 0.84  | 0.78  | 1.02  | 0.7 | 1.61 | -1.71 | 1.03  |
| A016255_01 | At5g54130 | putative protein; protein id: At   | 0 | 0.57  | 0.78  | 1.07  | 1.07  | 1.16  | 1.63  | 0.8 | 0.96 | -1.98 | -0.50 |
| A016266_01 | At5g47050 | putative protein; protein id: At   | 0 | 1.19  | 1.24  | 1.59  | 1.60  | 1.51  | 1.73  | 0.8 | 0.96 | -1.97 | 0.28  |
| A016278_01 | At5g61590 | ethylene responsive element        | 0 | 1.07  | 0.90  | 1.49  | 1.99  | 2.15  | 1.71  | 1.0 | 0.18 | -1.89 | -0.55 |
| A016281_01 | At5g58260 | similar to unknown protein (pi     | 0 | 0.71  | 1.03  | 0.76  | 0.95  | 0.67  | 0.20  | 1.4 | 0.06 | -0.71 | 1.35  |
| A016283_01 | At5g58370 | contains similarity to GTP-bin     | 0 | -0.51 | -0.58 | -0.41 | -0.87 | -0.78 | -1.12 | 0.9 | 0.41 | 2.57  | 0.06  |
| A016285_01 | At5g48230 | acetyl-CoA C-acetyltransferas      | 0 | -0.27 | -0.46 | -0.59 | -0.91 | -1.12 | -1.04 | 0.8 | 0.48 | 2.66  | 0.52  |
| A016316_01 | At5g67240 | exonuclease, putative; proteir     | 0 | -0.10 | -0.32 | -0.44 | -1.04 | -1.05 | -0.94 | 0.8 | 0.66 | 2.47  | 0.93  |
| A016319_01 | At5g44610 | expressed protein                  | 0 | 2.41  | 1.95  | 1.35  | 0.75  | 0.90  | 1.54  | 1.2 | 0.06 | -0.46 | 1.86  |
| A016321_01 | At5g44790 | ATP dependent copper transp        | 0 | 0.76  | 0.98  | 1.23  | 1.67  | 0.87  | 1.27  | 0.7 | 1.20 | -1.70 | 0.15  |
| A016323_01 | At5g15850 | zinc finger protein CONSTAN        | 0 | 1.18  | 1.40  | 1.51  | 1.69  | 1.65  | 1.78  | 1.0 | 0.18 | -2.03 | 0.22  |
| A016324_01 | At5g39610 | NAM / CUC2 - like protein; pr      | 0 | 2.57  | 1.89  | 1.46  | 1.26  | 1.03  | 1.83  | 0.7 | 0.96 | -0.73 | 1.61  |
| A016335_01 | At5g62670 | plasma membrane proton AT          | 0 | -0.12 | -0.70 | -0.77 | -1.25 | -1.19 | -1.53 | 0.9 | 0.26 | 2.62  | 0.69  |
| A016344_01 | At5g11200 | DEAD BOX RNA helicase RH           | 0 | -0.41 | -0.81 | -0.79 | -1.03 | -1.00 | -0.95 | 0.8 | 0.81 | 2.75  | -0.14 |
| A016359_01 | At5g09440 | putative protein; protein id: At   | 0 | 2.02  | 1.95  | 1.61  | 1.31  | 0.99  | 0.90  | 0.8 | 0.66 | -0.59 | 2.01  |
| A016364_01 | At5g48180 | unknown protein                    | 0 | 1.97  | 1.86  | 1.82  | 1.52  | 1.26  | 2.95  | 0.8 | 0.48 | -1.46 | 0.65  |
| A016369_01 | At5g49450 | bZIP family transcription factc    | 0 | 2.02  | 1.93  | 1.84  | 1.80  | 1.97  | 2.15  | 1.8 | 0.06 | -1.77 | 0.92  |
| A016372_01 | At5g57110 | calcium-transporting ATPase        | 0 | -0.06 | -0.71 | -0.54 | -1.27 | -1.70 | -1.34 | 0.7 | 1.61 | 2.52  | 0.80  |
| A016376_01 | At5g56360 | calmodulin-binding protein; pr     | 0 | -0.69 | -0.98 | -0.98 | -1.04 | -1.41 | -1.70 | 1.0 | 0.16 | 2.74  | -0.06 |
| A016393_01 | At5g59310 | nonspecific lipid-transfer prote   | 0 | 0.26  | 1.40  | 1.81  | 1.97  | 1.42  | 1.70  | 1.1 | 0.10 | -1.64 | -0.38 |
| A016402_01 | At5g10180 | sulfate transporter; protein id:   | 0 | 0.08  | 0.77  | 2.07  | 3.94  | 4.23  | 5.05  | 1.2 | 0.06 | -1.65 | -1.53 |
| A016407_01 | At5g47070 | protein serine threonine kinas     | 0 | 1.01  | 1.21  | 1.06  | 1.00  | 0.82  | 1.06  | 0.9 | 0.26 | -1.53 | 1.26  |
| A016411_01 | At5g03180 | putative protein; protein id: At   | 0 | 1.50  | 1.36  | 1.48  | 1.79  | 1.81  | 1.76  | 1.0 | 0.20 | -1.94 | 0.37  |
| A016417_01 | At5g17380 | 2-hydroxyphytanoyl-CoA lyas        | 0 | 0.96  | 0.94  | 0.73  | 0.62  | 0.35  | 1.05  | 0.7 | 1.61 | -1.03 | 1.34  |
| A016423_01 | At5g46770 | expressed protein; protein id:     | 0 | 0.31  | 0.68  | 0.96  | 1.14  | 1.35  | 1.68  | 1.2 | 0.06 | -1.92 | -0.99 |
| A016446_01 | At5g45890 | senescence-specific cysteine       | 0 | 2.69  | 0.99  | 4.64  | 1.77  | 1.68  | 5.74  | 1.2 | 0.06 | -1.05 | -0.39 |
| A016447_01 | At5g52540 | putative protein; protein id: At   | 0 | -1.17 | -1.10 | -1.05 | -1.22 | -1.22 | -1.52 | 0.9 | 0.27 | 2.66  | -0.88 |
| A016453_01 | At5g47210 | putative protein; protein id: At   | 0 | -0.44 | -0.67 | -0.75 | -1.29 | -1.76 | -1.37 | 0.7 | 2.21 | 2.56  | 0.61  |
| A016462_01 | At5g17420 | cellulose synthase catalytic su    | 0 | -0.91 | 0.12  | 0.78  | 2.18  | 1.15  | 1.10  | 0.8 | 0.81 | -1.14 | -1.52 |
| A016463_01 | At5g49480 | NaCl-inducible Ca2+-binding        | 0 | 0.53  | 0.85  | 1.39  | 1.17  | 1.38  | 2.32  | 1.2 | 0.06 | -1.81 | -0.72 |
| A016466_01 | At5g01090 | lectin - like protein; protein id: | 0 | -0.52 | -1.10 | -1.02 | -1.15 | -1.50 | -1.21 | 1.5 | 0.06 | 2.67  | -0.18 |
| A016473_01 | At5g01200 | myb family transcription facto     | 0 | 0.27  | 0.35  | 1.15  | 1.60  | 1.48  | 1.22  | 0.6 | 2.21 | -1.71 | -1.15 |
| A016484_01 | At5g16060 | hypothetical protein; protein ic   | 0 | -0.99 | -1.19 | -1.12 | -1.63 | -1.59 | -1.81 | 0.9 | 0.26 | 2.81  | -0.24 |
| A016536_01 | At5g47060 | putative protein; protein id: At   | 0 | -1.09 | -1.03 | -0.23 | -0.01 | 0.28  | 0.72  | 1.2 | 0.06 | -0.46 | -2.42 |
| A016586_01 | At5g06370 | putative protein; protein id: At   | 0 | 0.73  | 0.40  | 0.88  | 1.39  | 1.65  | 1.60  | 0.8 | 0.81 | -1.80 | -0.96 |
| A016612_01 | At5g01990 | putative protein; protein id: At   | 0 | 0.54  | 0.75  | 0.82  | 0.87  | 1.12  | 1.11  | 0.8 | 0.96 | -2.02 | -0.34 |

|            |           |                                   |   |       |       |       |       |       |       |     |      |       |       |
|------------|-----------|-----------------------------------|---|-------|-------|-------|-------|-------|-------|-----|------|-------|-------|
| A016615_01 | At5g02090 | putative protein; protein id: At  | 0 | 1.06  | 1.70  | 3.09  | 4.45  | 4.34  | 3.66  | 1.0 | 0.18 | -1.84 | -0.94 |
| A016618_01 | At5g03330 | putative protein; protein id: At  | 0 | 1.13  | 1.03  | 1.32  | 1.92  | 1.68  | 1.59  | 0.9 | 0.41 | -1.94 | -0.16 |
| A016625_01 | At5g56940 | 30S ribosomal protein S16; p      | 0 | -0.88 | -1.06 | -0.88 | -1.09 | -1.03 | -1.14 | 0.8 | 0.48 | 2.67  | -1.05 |
| A016628_01 | At5g54840 | SGP1 monomeric G-protein (        | 0 | 1.23  | 1.71  | 2.21  | 2.27  | 2.38  | 3.07  | 0.6 | 4.47 | -2.04 | -0.39 |
| A016644_01 | At5g18240 | transfactor-like protein; protei  | 0 | 0.57  | 1.28  | 1.37  | 1.25  | 0.94  | 1.29  | 1.0 | 0.26 | -1.68 | 0.33  |
| A016652_01 | At5g18130 | putative protein; protein id: At  | 0 | 1.89  | 1.91  | 2.32  | 2.57  | 2.68  | 3.09  | 1.5 | 0.06 | -2.04 | -0.04 |
| A016673_01 | At5g54630 | putative protein; protein id: At  | 0 | 0.23  | -0.21 | -0.35 | -0.55 | -1.13 | -1.29 | 1.0 | 0.16 | 2.25  | 1.22  |
| A016676_01 | At5g02540 | putative protein; protein id: At  | 0 | -0.93 | -2.03 | -1.92 | -2.30 | -2.52 | -2.52 | 1.1 | 0.06 | 2.76  | -0.09 |
| A016682_01 | At5g54660 | expressed protein; protein id:    | 0 | 1.42  | 1.67  | 1.69  | 1.85  | 1.73  | 1.98  | 0.8 | 0.48 | -1.97 | 0.47  |
| A016703_01 | At5g02970 | putative protein; protein id: At  | 0 | 1.13  | 1.19  | 1.15  | 1.33  | 1.49  | 1.68  | 1.3 | 0.06 | -2.01 | 0.21  |
| A016731_01 | At5g35690 | putative protein; protein id: At  | 0 | 0.45  | 0.59  | 0.80  | 1.14  | 1.30  | 1.43  | 1.2 | 0.06 | -1.95 | -0.92 |
| A016735_01 | At5g11970 | putative protein; protein id: At  | 0 | 0.34  | 0.70  | 0.76  | 0.76  | 0.73  | 1.17  | 0.7 | 1.61 | -1.91 | -0.32 |
| A016736_01 | At5g12080 | putative protein; protein id: At  | 0 | -1.56 | -1.45 | -1.65 | -1.78 | -1.33 | -1.67 | 0.9 | 0.41 | 2.48  | -1.29 |
| A016738_01 | At5g11650 | lysophospholipase - like prote    | 0 | 0.96  | 1.12  | 1.16  | 1.10  | 1.43  | 1.82  | 1.0 | 0.16 | -1.96 | 0.04  |
| A016751_01 | At5g11480 | putative GTP-binding protein      | 0 | -0.72 | -0.73 | -0.61 | -0.44 | -0.53 | -1.03 | 0.8 | 0.96 | 2.19  | -1.23 |
| A016754_01 | At5g11550 | putative protein; protein id: At  | 0 | -1.15 | -2.32 | -1.34 | -2.93 | -2.87 | NA    | 1.1 | 0.14 | NA    | NA    |
| A016761_01 | At5g14410 | putative protein; protein id: At  | 0 | 0.62  | 0.22  | 0.22  | 0.40  | -0.28 | -1.11 | 1.4 | 0.06 | 1.34  | 1.28  |
| A016762_01 | At5g61340 | putative protein; protein id: At  | 0 | 0.03  | 0.95  | 1.64  | 2.58  | 2.31  | 1.67  | 1.2 | 0.06 | -1.62 | -1.07 |
| A016812_01 | At5g08660 | hypothetical protein; protein ic  | 0 | 0.84  | 0.90  | 0.64  | 0.62  | 0.69  | 1.02  | 0.7 | 1.61 | -1.56 | 0.99  |
| A016817_01 | At5g60680 | putative protein; protein id: At  | 0 | 1.60  | 0.99  | 1.12  | 1.29  | 1.24  | 1.09  | 1.0 | 0.20 | -1.36 | 1.10  |
| A016830_01 | At5g49890 | CLC-c chloride channel prote      | 0 | 0.56  | 0.98  | 1.07  | 1.06  | 0.72  | 1.42  | 0.8 | 0.96 | -1.78 | 0.11  |
| A016836_01 | At5g49630 | amino acid permease 6 (emb        | 0 | 0.33  | 1.00  | 1.35  | 1.99  | 1.99  | 1.77  | 1.1 | 0.10 | -1.87 | -0.98 |
| A016839_01 | At5g57520 | CCHH finger protein 2-like pr     | 0 | 0.91  | 1.73  | 1.95  | 2.44  | 2.33  | 2.17  | 1.7 | 0.06 | -1.99 | -0.37 |
| A016860_01 | At5g09760 | pectin methylesterase - like p    | 0 | -0.79 | -1.04 | -1.36 | -1.30 | -1.81 | NA    | 0.8 | 0.66 | NA    | NA    |
| A016898_01 | At5g59430 | telomere repeat-binding prote     | 0 | 0.43  | 0.60  | 1.17  | 1.60  | 1.75  | 1.93  | 1.5 | 0.06 | -1.87 | -1.15 |
| A016904_01 | At5g11840 | putative protein; protein id: At  | 0 | 0.94  | 1.45  | 1.51  | 1.84  | 2.13  | 2.06  | 1.5 | 0.06 | -2.05 | -0.36 |
| A016907_01 | At5g23580 | calcium-dependent protein kin     | 0 | -1.29 | -1.37 | -1.51 | -1.46 | -1.58 | -1.73 | 0.7 | 1.20 | 2.73  | -0.86 |
| A016913_01 | At5g49720 | cellulase homolog OR16pep j       | 0 | 0.45  | 0.51  | 0.60  | 1.07  | 0.61  | 0.50  | 0.6 | 4.47 | -1.44 | 0.13  |
| A016914_01 | At5g02240 | putative protein; protein id: At  | 0 | -1.37 | -1.33 | -1.23 | -1.40 | -1.52 | -1.60 | 1.0 | 0.16 | 2.64  | -1.07 |
| A016922_01 | At5g59850 | cytoplasmic ribosomal proteir     | 0 | -1.31 | -1.46 | -1.29 | -1.93 | -2.30 | -2.26 | 1.8 | 0.06 | 2.78  | -0.16 |
| A016924_01 | At5g42200 | putative protein; protein id: At  | 0 | 1.67  | 1.84  | 1.67  | 0.89  | 0.54  | 0.56  | 0.7 | 1.61 | -0.15 | 2.11  |
| A016929_01 | At5g42920 | putative protein; protein id: At  | 0 | -0.88 | -1.01 | -0.93 | -1.13 | -1.12 | -1.12 | 0.9 | 0.41 | 2.71  | -0.89 |
| A016930_01 | At5g60600 | putative protein; protein id: At  | 0 | -0.05 | 0.41  | 0.74  | 1.04  | 1.11  | 1.22  | 1.2 | 0.06 | -1.76 | -1.36 |
| A016931_01 | At5g15020 | transcriptional regulatory - like | 0 | 0.55  | 0.74  | 0.84  | 0.95  | 0.45  | 1.41  | 0.7 | 2.21 | -1.61 | -0.01 |
| A016943_01 | At5g02290 | serine/threonine-specific prot    | 0 | 0.50  | 0.75  | 0.81  | 1.05  | 1.23  | 1.03  | 0.8 | 0.55 | -2.01 | -0.41 |
| A016950_01 | At5g61790 | calnexin - like protein; protein  | 0 | -0.93 | -0.63 | -0.66 | -1.08 | -1.40 | -1.08 | 1.1 | 0.10 | 2.54  | -0.24 |
| A016951_01 | At5g49660 | receptor protein kinase; prote    | 0 | -0.02 | 0.53  | 0.99  | 1.53  | 1.56  | 1.89  | 0.8 | 0.81 | -1.76 | -1.38 |
| A016955_01 | At5g38895 | expressed protein; protein id:    | 0 | 0.90  | 1.03  | 1.25  | 1.61  | 1.78  | 1.52  | 1.1 | 0.10 | -2.00 | -0.34 |
| A016960_01 | At5g02880 | putative protein; protein id: At  | 0 | 1.11  | 1.22  | 1.44  | 1.22  | 1.23  | 1.79  | 0.8 | 0.66 | -1.91 | 0.38  |
| A016969_01 | At5g62570 | calmodulin-binding protein; pr    | 0 | 0.95  | 1.08  | 1.19  | 1.32  | 1.34  | 1.81  | 0.8 | 0.66 | -2.02 | -0.04 |
| A016977_01 | At5g50790 | MtN3-like protein; protein id: /  | 0 | -0.32 | -1.04 | -0.98 | -1.38 | -1.46 | -1.32 | 0.9 | 0.41 | 2.61  | 0.11  |
| A016979_01 | At5g23250 | succinyl-CoA synthetase, alpl     | 0 | -1.15 | -1.36 | -1.13 | -1.35 | -1.41 | -1.49 | 1.0 | 0.18 | 2.69  | -0.95 |
| A017000_01 | At5g66930 | putative protein; protein id: At  | 0 | 1.09  | 1.11  | 1.02  | 1.00  | 1.05  | 1.22  | 1.4 | 0.06 | -1.78 | 0.91  |
| A017003_01 | At5g05200 | unknown protein                   | 0 | 0.41  | 0.87  | 1.00  | 1.39  | 1.60  | 1.51  | 1.2 | 0.06 | -1.96 | -0.85 |

|            |           |                                   |   |       |       |       |       |       |       |     |      |       |       |
|------------|-----------|-----------------------------------|---|-------|-------|-------|-------|-------|-------|-----|------|-------|-------|
| A017010_01 | At5g02960 | putative protein; protein id: At  | 0 | -0.51 | -0.81 | -0.74 | -1.33 | -1.56 | -1.54 | 0.9 | 0.27 | 2.72  | 0.42  |
| A017015_01 | At5g17870 | plastid-specific ribosomal pro    | 0 | -0.54 | -0.78 | -0.88 | -1.02 | -1.16 | -1.50 | 0.7 | 2.21 | 2.76  | 0.09  |
| A017016_01 | At5g02450 | 60S ribosomal protein - like; p   | 0 | -0.53 | -1.22 | -1.08 | -1.78 | -2.08 | -2.06 | 1.2 | 0.06 | 2.73  | 0.39  |
| A017022_01 | At5g41050 | expressed protein; protein id:    | 0 | -0.21 | -0.52 | -0.56 | -0.76 | -0.86 | -1.15 | 1.2 | 0.06 | 2.67  | 0.52  |
| A017026_01 | At5g17770 | NADH-cytochrome b5 reducta        | 0 | -0.57 | -0.66 | -0.66 | -0.42 | -0.93 | -1.27 | 0.7 | 1.20 | 2.37  | -0.16 |
| A017034_01 | At5g02120 | one helix protein (OHP); prote    | 0 | 0.33  | 0.64  | 0.62  | 0.95  | 1.02  | 1.13  | 0.6 | 2.21 | -2.01 | -0.71 |
| A017035_01 | At5g02480 | putative protein; protein id: At  | 0 | 0.07  | 0.53  | 0.80  | 0.94  | 0.82  | 1.09  | 0.9 | 0.31 | -1.82 | -0.93 |
| A017038_01 | At5g26000 | glycosyl hydrolase family 1, m    | 0 | -0.80 | -2.93 | -2.70 | -4.37 | -4.32 | -3.71 | 1.3 | 0.06 | 2.63  | 0.30  |
| A017042_01 | At5g64860 | glycosyl hydrolase family 77 (    | 0 | -1.15 | -1.62 | -1.39 | -1.11 | -1.16 | -2.16 | 0.7 | 1.61 | 2.38  | -0.98 |
| A017044_01 | At5g64840 | ABC transporter family protein    | 0 | 1.47  | 1.94  | 2.04  | 1.76  | 1.30  | 2.14  | 0.8 | 0.81 | -1.65 | 0.84  |
| A017046_01 | At5g24530 | flavanone 3-hydroxylase-like      | 0 | 0.24  | 0.87  | 1.24  | 1.47  | 1.83  | 1.89  | 0.8 | 0.55 | -1.89 | -1.05 |
| A017048_01 | At5g52650 | putative protein; protein id: At  | 0 | -0.66 | -1.04 | -0.95 | -1.54 | -1.72 | -1.67 | 1.1 | 0.10 | 2.78  | 0.20  |
| A017049_01 | At5g14210 | leucine-rich repeat transmem      | 0 | -0.56 | -1.00 | -1.06 | -1.30 | -1.48 | -1.64 | 1.4 | 0.06 | 2.79  | 0.13  |
| A017063_01 | At5g08620 | DEAD/DEAH box RNA helica          | 0 | -0.90 | -1.24 | -1.04 | -1.78 | -1.70 | -1.96 | 1.2 | 0.06 | 2.76  | 0.01  |
| A017073_01 | At5g23660 | MtN3-like protein; protein id: /  | 0 | 1.54  | 2.29  | 2.67  | 2.75  | 2.70  | 2.85  | 1.8 | 0.06 | -2.01 | 0.04  |
| A017088_01 | At5g15350 | putative protein; protein id: At  | 0 | -0.95 | -0.76 | -1.11 | -1.81 | -2.02 | -1.96 | 0.8 | 0.81 | 2.63  | 0.38  |
| A017092_01 | At5g15230 | GASA4; protein id: At5g15230      | 0 | -1.02 | -1.72 | -1.83 | -2.57 | -3.02 | -2.72 | 1.5 | 0.06 | 2.76  | 0.21  |
| A017095_01 | At5g58960 | putative protein; protein id: At  | 0 | -0.80 | -1.32 | -1.98 | -1.44 | -1.62 | -1.78 | 0.9 | 0.31 | 2.59  | -0.40 |
| A017100_01 | At5g04040 | expressed protein; protein id:    | 0 | 0.82  | 0.99  | 0.94  | 0.99  | 1.21  | 1.30  | 1.2 | 0.06 | -2.01 | 0.19  |
| A017116_01 | At5g62390 | KED - like protein; protein id:   | 0 | -0.11 | -0.41 | -0.70 | -1.49 | -1.85 | -1.41 | 1.1 | 0.14 | 2.39  | 1.02  |
| A017122_01 | At5g46790 | putative protein; protein id: At  | 0 | 0.62  | 1.10  | 1.36  | 1.62  | 1.64  | 1.92  | 1.3 | 0.06 | -2.03 | -0.59 |
| A017128_01 | At5g51070 | ATP-dependent Clp protease        | 0 | 1.42  | 1.80  | 1.86  | 1.87  | 2.16  | 2.65  | 1.8 | 0.06 | -2.02 | 0.07  |
| A017135_01 | At5g45880 | Ole e I (main olive allergen)-li  | 0 | 0.49  | 0.66  | 1.09  | 1.09  | 1.14  | 1.87  | 1.1 | 0.14 | -1.86 | -0.74 |
| A017160_01 | At5g57800 | lipid transfer protein; glossy1   | 0 | 0.27  | 1.00  | 1.40  | 1.43  | 1.19  | 1.68  | 1.1 | 0.10 | -1.74 | -0.52 |
| A017178_01 | At5g12390 | putative protein; protein id: At  | 0 | 0.45  | 0.51  | 0.70  | 0.85  | 0.98  | 1.00  | 0.9 | 0.31 | -1.98 | -0.65 |
| A017185_01 | At5g61290 | putative protein; protein id: At  | 0 | -0.30 | -0.38 | -0.65 | -0.63 | -0.77 | -1.51 | 0.6 | 4.47 | 2.41  | 0.44  |
| A017207_01 | At5g55220 | trigger factor-like protein; prot | 0 | -0.66 | -0.86 | -0.72 | -0.83 | -0.98 | -1.51 | 0.7 | 2.21 | 2.64  | -0.24 |
| A017277_01 | At5g17860 | potassium-dependent sodium        | 0 | 1.37  | 1.68  | 1.48  | 1.54  | 1.50  | 2.04  | 1.1 | 0.14 | -1.89 | 0.60  |
| A017284_01 | At5g40690 | putative protein; protein id: At  | 0 | 3.36  | 3.11  | 2.81  | 2.21  | 2.07  | 3.55  | 1.1 | 0.06 | -1.35 | 1.29  |
| A017293_01 | At5g03740 | histone deacetylase -like prot    | 0 | -0.61 | -0.99 | -0.88 | -1.51 | -1.19 | -1.59 | 1.0 | 0.18 | 2.74  | 0.03  |
| A017305_01 | At5g62560 | putative protein; protein id: At  | 0 | 0.66  | 0.69  | 0.68  | 0.94  | 0.90  | 1.02  | 0.7 | 0.96 | -2.01 | 0.00  |
| A017311_01 | At5g13330 | putative protein; protein id: At  | 0 | 1.54  | 1.28  | 0.85  | 0.27  | 0.45  | 0.85  | 0.7 | 1.20 | -0.15 | 1.97  |
| A017331_01 | At5g12110 | elongation factor 1B alpha-su     | 0 | -0.72 | -0.63 | -0.74 | -1.10 | -1.05 | -1.17 | 0.9 | 0.41 | 2.74  | -0.15 |
| A017335_01 | At5g10770 | nucleoid DNA-binding protein      | 0 | 2.03  | 1.56  | 1.06  | 1.19  | 0.32  | 1.72  | 0.7 | 2.21 | -0.53 | 1.33  |
| A017360_01 | At5g47860 | putative protein; protein id: At  | 0 | 1.36  | 1.87  | 1.93  | 2.15  | 2.30  | 2.74  | 1.9 | 0.06 | -2.06 | -0.11 |
| A017378_01 | At5g61960 | meiosis protein mei2-related;     | 0 | 0.47  | 0.69  | 0.86  | 0.85  | 0.77  | 1.24  | 0.7 | 1.61 | -1.94 | -0.21 |
| A017380_01 | At5g40480 | nuclear pore protein -like; pro   | 0 | -1.85 | -1.81 | -1.53 | -2.36 | -1.69 | -2.60 | 0.8 | 0.55 | 2.59  | -0.80 |
| A017387_01 | At5g45800 | leucine-rich repeat transmem      | 0 | 1.52  | 1.74  | 1.57  | 1.64  | 1.61  | 1.83  | 1.1 | 0.14 | -1.85 | 0.82  |
| A017393_01 | At5g43300 | putative protein; protein id: At  | 0 | 0.13  | 0.20  | 0.72  | 0.73  | 0.75  | 1.18  | 0.6 | 2.21 | -1.72 | -1.24 |
| A017394_01 | At5g65870 | putative protein; protein id: At  | 0 | 1.04  | 1.89  | 1.95  | 1.94  | 1.86  | 1.92  | 0.8 | 0.48 | -1.87 | 0.27  |
| A017405_01 | At5g55860 | myosin heavy chain-like; prot     | 0 | 0.57  | 0.60  | 0.73  | 0.69  | 0.72  | 1.09  | 0.8 | 0.48 | -1.93 | 0.02  |
| A017413_01 | At5g63940 | putative protein; protein id: At  | 0 | -0.77 | -0.72 | -0.73 | -0.88 | -1.02 | -0.66 | 0.8 | 0.96 | 2.45  | -0.95 |
| A017434_01 | At5g23210 | serine carboxypeptidase II-lik    | 0 | 0.51  | 0.93  | 0.86  | 1.13  | 1.13  | 0.93  | 0.8 | 0.55 | -1.88 | 0.01  |
| A017451_01 | At5g12000 | putative receptor - like kinase   | 0 | 0.50  | 0.89  | 1.29  | 0.84  | 1.18  | 1.79  | 0.8 | 0.96 | -1.83 | -0.45 |

|            |           |                                  |   |       |       |       |       |       |       |     |      |       |       |
|------------|-----------|----------------------------------|---|-------|-------|-------|-------|-------|-------|-----|------|-------|-------|
| A017452_01 | At5g09990 | expressed protein; protein id:   | 0 | -1.46 | -1.52 | -1.18 | -0.17 | -0.18 | 0.43  | 0.7 | 1.61 | 0.00  | -2.49 |
| A017466_01 | At5g11640 | TITL putative protein; protein   | 0 | -0.54 | -0.73 | -0.78 | -0.95 | -1.11 | -1.20 | 0.9 | 0.31 | 2.81  | -0.03 |
| A017468_01 | At5g25280 | serine-rich protein; protein id: | 0 | 2.35  | 2.42  | 1.98  | 2.35  | 2.11  | 2.17  | 1.0 | 0.20 | -1.64 | 1.16  |
| A017477_01 | At5g45350 | expressed protein; protein id:   | 0 | 1.18  | 1.92  | 2.03  | 2.45  | 2.09  | 2.63  | 1.3 | 0.06 | -2.03 | -0.14 |
| A017486_01 | At5g59030 | copper transport protein; prot   | 0 | 0.92  | 0.91  | 0.88  | 0.99  | 1.08  | 1.06  | 0.8 | 0.55 | -1.90 | 0.54  |
| A017513_01 | At5g13930 | chalcone synthase; protein id    | 0 | -3.19 | -3.58 | -2.37 | -3.71 | -3.93 | -2.51 | 1.2 | 0.06 | 2.33  | -1.31 |
| A017562_01 | At5g52550 | putative protein; protein id: At | 0 | 0.40  | 0.57  | 0.69  | 0.94  | 1.00  | 0.80  | 0.9 | 0.37 | -1.96 | -0.51 |
| A017564_01 | At5g61420 | myb-related transcription fact   | 0 | 0.17  | 0.96  | 1.36  | 1.41  | 1.50  | 2.14  | 1.4 | 0.06 | -1.84 | -0.95 |
| A017575_01 | At5g01850 | protein kinase ATN1-like prot    | 0 | 1.08  | 1.34  | 1.12  | 0.89  | 0.89  | 1.24  | 1.0 | 0.16 | -1.47 | 1.26  |
| A017595_01 | At5g01880 | putative protein; protein id: At | 0 | 1.52  | 1.27  | 1.52  | 1.43  | 1.53  | 1.49  | 0.8 | 0.55 | -1.78 | 0.78  |
| A017636_01 | At5g67540 | glycosyl hydrolase family 43; j  | 0 | 0.62  | 0.86  | 0.84  | 0.93  | 0.79  | 0.78  | 0.8 | 0.55 | -1.73 | 0.66  |
| A017640_01 | At5g57910 | putative protein; protein id: At | 0 | 1.65  | 1.75  | 1.62  | 2.05  | 2.16  | 2.20  | 1.2 | 0.06 | -1.98 | 0.27  |
| A017656_01 | At5g45900 | AtAPG7; ubiquitin activating e   | 0 | 1.36  | 0.99  | 0.85  | 0.72  | 0.95  | 1.95  | 0.7 | 1.20 | -1.24 | 0.37  |
| A017657_01 | At5g45930 | magnesium chelatase subuni       | 0 | -0.68 | -0.75 | -0.99 | -0.66 | -0.89 | -1.72 | 0.8 | 0.48 | 2.42  | -0.24 |
| A017659_01 | At5g44730 | Dreg-2 like protein; protein id: | 0 | -0.46 | -0.65 | -0.56 | -0.70 | -1.01 | -1.29 | 0.9 | 0.37 | 2.69  | 0.07  |
| A017664_01 | At5g46760 | bHLH protein; protein id: At5g   | 0 | 1.35  | 1.28  | 1.31  | 1.28  | 0.90  | 1.47  | 0.8 | 0.81 | -1.56 | 1.12  |
| A017667_01 | At5g58930 | putative protein; protein id: At | 0 | -1.10 | -1.77 | -1.63 | -1.57 | -1.49 | -1.85 | 1.1 | 0.14 | 2.58  | -0.95 |
| A017692_01 | At5g64930 | CPR5 protein, putative; protei   | 0 | 1.08  | 0.94  | 0.72  | 0.52  | 0.61  | 0.55  | 0.9 | 0.26 | -0.66 | 1.97  |
| A017695_01 | At5g58770 | dehydrodolichyl diphosphate :    | 0 | 0.94  | 2.51  | 2.96  | 3.04  | 3.33  | 3.39  | 1.1 | 0.10 | -1.94 | -0.46 |
| A017701_01 | At5g47930 | putative ribosomal protein S2    | 0 | -0.86 | -1.09 | -0.96 | -1.47 | -1.58 | -1.74 | 1.0 | 0.16 | 2.81  | -0.09 |
| A017714_01 | At5g47500 | pectinesterase family; protein   | 0 | -0.74 | -3.00 | -3.42 | NA    | -3.80 | -3.47 | 1.2 | 0.06 | NA    | NA    |
| A017742_01 | At5g22650 | histone deacetylase-like prote   | 0 | -0.68 | -0.93 | -0.72 | -1.23 | -1.13 | -1.28 | 1.1 | 0.10 | 2.79  | -0.26 |
| A017746_01 | At5g42680 | putative protein; protein id: At | 0 | -0.21 | -0.30 | -0.54 | -0.64 | -1.32 | -1.29 | 0.9 | 0.41 | 2.40  | 0.87  |
| A017758_01 | At5g11070 | putative protein; protein id: At | 0 | 1.62  | 1.74  | 1.78  | 1.88  | 1.39  | 1.00  | 1.2 | 0.06 | -1.18 | 1.31  |
| A017764_01 | At5g61810 | peroxisomal Ca-dependent s       | 0 | -0.86 | -1.01 | -1.10 | -1.12 | -1.16 | -1.27 | 0.8 | 0.96 | 2.76  | -0.74 |
| A017807_01 | At5g13280 | aspartate kinase; protein id: A  | 0 | -0.61 | -0.77 | -0.70 | -0.91 | -0.81 | -1.08 | 0.8 | 0.55 | 2.76  | -0.51 |
| A017815_01 | At4g13261 | hypothetical protein; protein ic | 0 | 1.01  | -0.77 | -0.09 | -3.07 | -2.85 | -2.98 | 1.1 | 0.14 | 2.23  | 1.02  |
| A017848_01 | At5g59960 | putative protein; protein id: At | 0 | 1.61  | 1.52  | 1.42  | 1.48  | 1.21  | 1.55  | 0.8 | 0.66 | -1.59 | 1.21  |
| A017858_01 | At5g16630 | putative protein; protein id: At | 0 | 0.61  | 1.01  | 0.95  | 1.25  | 1.36  | 1.36  | 1.2 | 0.06 | -2.05 | -0.32 |
| A017860_01 | At5g65310 | homeobox-leucine zipper proi     | 0 | -1.84 | -2.40 | -2.28 | -2.06 | -2.27 | -2.49 | 1.3 | 0.06 | 2.62  | -1.10 |
| A017867_01 | At5g05110 | putative cysteine proteinase ii  | 0 | 1.26  | 1.70  | 1.77  | 1.95  | 2.19  | 2.33  | 1.5 | 0.06 | -2.06 | -0.09 |
| A017868_01 | At5g56460 | protein kinase-like protein; pr  | 0 | 1.03  | 1.42  | 1.54  | 1.36  | 1.42  | 1.84  | 1.2 | 0.06 | -1.94 | 0.32  |
| A017871_01 | At5g10830 | embryonic abundant protein -     | 0 | 1.35  | 1.63  | 1.57  | 1.00  | 1.21  | 1.99  | 1.2 | 0.06 | -1.40 | 0.57  |
| A017872_01 | At5g50380 | putative protein; protein id: At | 0 | 0.50  | 0.69  | 0.85  | 1.03  | 0.97  | 1.21  | 0.8 | 0.96 | -2.04 | -0.45 |
| A017874_01 | At5g49930 | putative protein; protein id: At | 0 | 0.23  | 0.47  | 0.55  | 0.43  | 0.70  | 1.01  | 0.7 | 2.21 | -1.80 | -0.67 |
| A017890_01 | At5g23050 | acetyl-CoA synthetase-like pr    | 0 | 1.26  | 1.28  | 1.34  | 0.78  | 0.93  | 1.53  | 0.7 | 2.21 | -1.42 | 1.13  |
| A017894_01 | At5g02870 | 60S ribosomal protein - like; p  | 0 | -1.22 | -1.50 | -1.43 | -2.05 | -2.12 | -2.31 | 1.2 | 0.06 | 2.80  | -0.14 |
| A017897_01 | At5g64670 | putative protein; protein id: At | 0 | -1.05 | -1.20 | -0.90 | -1.36 | -1.34 | -1.52 | 1.4 | 0.06 | 2.71  | -0.64 |
| A017902_01 | At5g42050 | putative protein; protein id: At | 0 | 0.87  | 1.30  | 1.24  | 1.09  | 0.99  | 1.40  | 1.0 | 0.18 | -1.73 | 0.69  |
| A017904_01 | At5g23940 | acyltransferase; protein id: At  | 0 | -2.08 | -2.50 | -2.30 | -3.53 | NA    | -3.75 | 0.7 | 1.20 | NA    | NA    |
| A017915_01 | At5g62270 | putative protein; protein id: At | 0 | -1.25 | -1.23 | -1.23 | -2.14 | -2.01 | NA    | 0.8 | 0.48 | NA    | NA    |
| A017925_01 | At5g53450 | putative protein; protein id: At | 0 | 0.76  | 1.05  | 1.29  | 1.52  | 1.82  | 2.14  | 1.8 | 0.06 | -2.00 | -0.68 |
| A017933_01 | At5g66470 | GTP-binding protein-like; prot   | 0 | -0.97 | -1.09 | -0.96 | -1.18 | -1.06 | -1.29 | 0.6 | 4.47 | 2.68  | -0.99 |
| A017935_01 | At5g42310 | maize crp1 protein-like; protei  | 0 | 0.83  | 1.15  | 1.31  | 1.23  | 1.13  | 1.24  | 0.8 | 0.55 | -1.90 | 0.46  |

|            |           |                                   |   |       |       |       |       |       |       |     |      |       |       |
|------------|-----------|-----------------------------------|---|-------|-------|-------|-------|-------|-------|-----|------|-------|-------|
| A017938_01 | At5g06320 | harpin-induced protein-like; p    | 0 | 0.95  | 1.38  | 1.18  | 1.01  | 0.95  | 0.79  | 1.0 | 0.26 | -1.18 | 1.32  |
| A017942_01 | At5g22580 | expressed protein; protein id:    | 0 | -2.86 | -3.34 | -2.54 | -4.66 | -4.30 | -4.01 | 1.8 | 0.06 | 2.74  | -0.53 |
| A017962_01 | At5g04720 | disease resistance protein (C     | 0 | 0.88  | 1.09  | 0.97  | 0.97  | 1.01  | 1.28  | 0.7 | 1.61 | -1.91 | 0.58  |
| A017971_01 | At5g50810 | small zinc finger-like protein; j | 0 | -1.22 | -1.27 | -1.10 | -1.42 | -1.58 | -1.57 | 1.2 | 0.06 | 2.73  | -0.76 |
| A017972_01 | At5g50000 | protein kinase; protein id: At5   | 0 | -0.23 | -0.63 | -0.66 | -1.04 | -1.15 | -1.14 | 0.9 | 0.27 | 2.70  | 0.51  |
| A017974_01 | At5g50030 | putative protein; protein id: At  | 0 | 0.11  | 0.44  | 0.79  | 0.81  | 1.04  | 1.38  | 0.7 | 1.61 | -1.79 | -1.12 |
| A017977_01 | At5g01520 | putative protein; protein id: At  | 0 | 2.58  | 2.74  | 2.92  | 3.01  | 3.19  | 3.43  | 2.3 | 0.06 | -1.98 | 0.44  |
| A017979_01 | At5g02380 | metallothionein 2b; protein id:   | 0 | 0.02  | 0.39  | 0.64  | 0.68  | 0.48  | 1.53  | 0.7 | 1.20 | -1.46 | -1.07 |
| A017980_01 | At5g50100 | putative protein; protein id: At  | 0 | 0.75  | 1.18  | 1.23  | 1.20  | 1.47  | 1.90  | 1.1 | 0.14 | -2.00 | -0.26 |
| A017983_01 | At5g50130 | ribitol dehydrogenase-like; pro   | 0 | 0.31  | 0.91  | 1.37  | 2.02  | 1.69  | 1.50  | 0.6 | 4.47 | -1.78 | -0.84 |
| A017993_01 | At5g43850 | putative protein; protein id: At  | 0 | 0.97  | 1.18  | 1.33  | 1.28  | 1.52  | 1.72  | 1.2 | 0.06 | -2.01 | 0.09  |
| A017995_01 | At5g44030 | cellulose synthase catalytic su   | 0 | -0.18 | 0.86  | 1.35  | 2.76  | 1.84  | 1.40  | 0.8 | 0.48 | -1.43 | -1.04 |
| A018000_01 | At5g08300 | succinyl-CoA-ligase alpha sul     | 0 | -0.86 | -0.79 | -0.79 | -1.01 | -1.24 | -0.97 | 1.5 | 0.06 | 2.66  | -0.65 |
| A018019_01 | At5g14740 | carbonic anhydrase 2; protein     | 0 | 2.55  | 2.17  | 1.34  | 0.65  | 0.13  | -0.25 | 0.7 | 1.20 | 0.66  | 2.20  |
| A018028_01 | At5g39740 | ribosomal protein L5 - like; pr   | 0 | -0.45 | -0.81 | -0.82 | -1.47 | -1.75 | -1.80 | 0.7 | 1.20 | 2.66  | 0.60  |
| A018032_01 | At5g09220 | amino acid transport protein /    | 0 | -0.40 | -0.80 | 0.66  | 1.66  | 1.47  | 2.09  | 1.2 | 0.06 | -1.18 | -1.91 |
| A018042_01 | At5g66860 | putative protein; protein id: At  | 0 | -0.44 | -0.59 | -0.65 | -0.92 | -1.02 | -1.13 | 0.9 | 0.31 | 2.76  | 0.25  |
| A018049_01 | At5g64580 | putative protein; protein id: At  | 0 | -1.23 | -1.04 | -0.99 | -0.89 | -0.89 | -0.97 | 0.6 | 2.21 | 2.12  | -1.88 |
| A018052_01 | At5g61210 | syntaxin SNAP33; protein id:      | 0 | 0.56  | 0.86  | 1.03  | 1.27  | 1.03  | 1.12  | 0.7 | 2.21 | -1.96 | -0.12 |
| A018058_01 | At5g66170 | senescence-associated prote       | 0 | 1.92  | 2.15  | 1.99  | 2.02  | 1.71  | 1.36  | 1.6 | 0.06 | -1.32 | 1.36  |
| A018060_01 | At5g52840 | expressed protein; protein id:    | 0 | -0.79 | -0.89 | -0.92 | -1.04 | -1.11 | -1.04 | 0.8 | 0.48 | 2.75  | -0.68 |
| A018064_01 | At5g50920 | ATP-dependent Clp protease        | 0 | 0.23  | 0.70  | 0.83  | 1.00  | 1.08  | 1.52  | 1.7 | 0.06 | -1.90 | -0.92 |
| A018066_01 | At5g61820 | putative protein; protein id: At  | 0 | 1.98  | 2.56  | 2.93  | 2.54  | 2.42  | 3.08  | 1.2 | 0.06 | -1.91 | 0.50  |
| A018068_01 | At5g65110 | acyl-CoA oxidase (gb AAC13-       | 0 | 0.76  | 0.98  | 0.99  | 0.88  | 0.83  | 1.65  | 1.1 | 0.10 | -1.76 | 0.13  |
| A018070_01 | At5g47540 | putative protein; protein id: At  | 0 | 1.10  | 1.14  | 1.20  | 0.96  | 1.53  | 1.24  | 0.8 | 0.55 | -1.77 | 0.58  |
| A018071_01 | At5g46700 | senescence-associated prote       | 0 | -0.94 | -1.18 | -1.25 | -1.77 | -1.89 | -2.05 | 0.9 | 0.27 | 2.81  | 0.02  |
| A018085_01 | At5g04850 | expressed protein; protein id:    | 0 | 0.93  | 1.06  | 1.05  | 1.03  | 1.43  | 1.51  | 1.2 | 0.06 | -1.98 | 0.09  |
| A018089_01 | At5g09660 | microbody NAD-dependent m         | 0 | 0.85  | 1.34  | 1.40  | 1.40  | 1.17  | 1.47  | 1.0 | 0.20 | -1.89 | 0.40  |
| A018100_01 | At5g41080 | putative protein; protein id: At  | 0 | 0.71  | 0.35  | 0.08  | -0.90 | -1.43 | -0.59 | 0.7 | 1.61 | 1.74  | 1.62  |
| A018103_01 | xxxx      | b/t hypothetical protein; protei  | 0 | 0.69  | 0.73  | 1.04  | 1.14  | 1.18  | 1.05  | 0.8 | 0.81 | -2.01 | -0.16 |
| A018105_01 | At5g04750 | F1F0-ATPase inhibitor - like p    | 0 | 0.45  | 0.27  | 0.56  | 1.09  | 1.08  | 0.76  | 0.9 | 0.37 | -1.62 | -0.90 |
| A018110_01 | At5g59960 | putative protein; protein id: At  | 0 | 1.46  | 1.48  | 1.50  | 1.66  | 1.57  | 1.74  | 0.9 | 0.41 | -1.91 | 0.65  |
| A018139_01 | At5g13770 | putative protein; protein id: At  | 0 | 0.90  | 1.20  | 1.45  | 1.77  | 1.63  | 1.71  | 1.3 | 0.06 | -2.04 | -0.21 |
| A018147_01 | At5g54170 | membrane related protein-like     | 0 | 1.41  | 1.61  | 1.37  | 1.23  | 1.41  | 1.67  | 1.5 | 0.06 | -1.69 | 1.00  |
| A018153_01 | At5g21020 | putative protein; protein id: At  | 0 | 1.37  | 1.49  | 1.43  | 1.38  | 1.72  | 1.45  | 1.0 | 0.18 | -1.81 | 0.74  |
| A018154_01 | At5g56660 | IAA-amino acid hydrolase (gb      | 0 | 0.02  | 0.45  | 0.71  | 0.97  | 1.06  | 0.94  | 0.9 | 0.37 | -1.79 | -1.19 |
| A018156_01 | At5g57350 | plasma membrane ATPase 3          | 0 | 0.91  | 1.33  | 1.27  | 1.49  | 1.53  | 2.15  | 1.3 | 0.06 | -2.00 | -0.22 |
| A018157_01 | At5g62540 | ubiquitin-conjugating enzyme      | 0 | 1.53  | 1.25  | 1.03  | 0.72  | 0.99  | 1.13  | 1.0 | 0.16 | -1.03 | 1.59  |
| A018159_01 | At5g24160 | squalene monooxygenase 1,2        | 0 | 2.55  | 3.03  | 2.90  | 2.82  | 2.69  | 3.15  | 1.7 | 0.06 | -1.83 | 0.83  |
| A018163_01 | At5g56840 | putative protein; protein id: At  | 0 | -0.30 | 0.25  | 0.82  | 2.43  | 2.09  | 1.45  | 0.9 | 0.26 | -1.41 | -1.56 |
| A018176_01 | At5g03760 | putative protein; protein id: At  | 0 | -1.11 | -0.92 | -0.82 | -0.61 | -0.63 | -0.37 | 0.7 | 1.20 | 1.17  | -2.21 |
| A018189_01 | At5g04080 | putative protein; protein id: At  | 0 | 0.87  | 1.78  | 2.19  | 2.30  | 2.36  | 2.66  | 0.6 | 4.47 | -2.00 | -0.43 |
| A018195_01 | At5g51970 | sorbitol dehydrogenase-like p     | 0 | 1.11  | 0.99  | 0.99  | 1.09  | 1.40  | 0.99  | 1.0 | 0.26 | -1.73 | 0.59  |
| A018237_01 | At5g11890 | putative protein; protein id: At  | 0 | -1.15 | -1.51 | -1.49 | -1.44 | -1.48 | -2.19 | 0.9 | 0.27 | 2.68  | -0.64 |

|            |           |                                  |   |       |       |       |       |       |       |     |      |       |       |
|------------|-----------|----------------------------------|---|-------|-------|-------|-------|-------|-------|-----|------|-------|-------|
| A018240_01 | At5g12010 | putative protein; protein id: At | 0 | 1.48  | 1.41  | 1.28  | 0.76  | 0.36  | 1.07  | 0.8 | 0.81 | -0.53 | 1.91  |
| A018251_01 | At5g14360 | putative protein; protein id: At | 0 | 1.79  | 1.32  | 0.85  | -0.19 | -0.33 | NA    | 1.0 | 0.16 | NA    | NA    |
| A018258_01 | At5g39080 | acyltransferase -like protein; p | 0 | 0.84  | 1.23  | 1.25  | 1.42  | 1.45  | 1.39  | 1.2 | 0.06 | -2.01 | 0.12  |
| A018259_01 | At5g39090 | acyltransferase -like protein; p | 0 | 0.30  | 1.34  | 2.15  | 2.82  | 2.87  | 3.40  | 1.4 | 0.06 | -1.86 | -1.15 |
| A018264_01 | At5g05930 | expressed protein; protein id:   | 0 | 1.06  | 1.16  | 1.00  | 1.07  | 1.12  | 1.16  | 1.3 | 0.06 | -1.80 | 0.83  |
| A018267_01 | At5g25220 | KNAT3 homeodomain proteir        | 0 | 1.03  | 1.24  | 1.19  | 1.25  | 1.15  | 1.22  | 1.0 | 0.16 | -1.86 | 0.77  |
| A018270_01 | At5g24120 | sigma-like factor (emb CAA7      | 0 | 1.32  | 1.90  | 2.24  | 2.12  | 2.51  | 2.87  | 1.1 | 0.14 | -2.03 | -0.17 |
| A018272_01 | At5g40470 | putative protein; protein id: At | 0 | 0.48  | 0.57  | 0.78  | 1.08  | 1.06  | 1.40  | 0.7 | 0.96 | -1.95 | -0.79 |
| A018277_01 | At5g08180 | nhp2-like protein; protein id: A | 0 | -0.94 | -1.13 | -0.99 | -1.80 | -1.98 | -1.91 | 1.7 | 0.06 | 2.75  | 0.13  |
| A018280_01 | At5g37070 | putative protein; protein id: At | 0 | 0.88  | 1.21  | 1.31  | 1.61  | 1.54  | 1.56  | 1.2 | 0.06 | -2.04 | -0.07 |
| A018297_01 | At5g47190 | putative protein; protein id: At | 0 | -0.68 | -1.03 | -1.02 | -1.02 | -1.24 | -1.55 | 0.7 | 1.61 | 2.76  | -0.28 |
| A018300_01 | At5g08050 | putative protein; protein id: At | 0 | 0.20  | -0.05 | -0.46 | -0.69 | -0.89 | -1.60 | 0.7 | 1.20 | 2.18  | 1.23  |
| A018307_01 | At5g55850 | NOI protein, nitrate-induced; p  | 0 | 0.41  | 0.62  | 0.85  | 1.00  | 0.86  | 1.32  | 0.9 | 0.27 | -1.95 | -0.56 |
| A018308_01 | At5g16360 | putative protein; protein id: At | 0 | 1.42  | 1.37  | 0.91  | 0.15  | -0.13 | 0.81  | 0.8 | 0.55 | 0.24  | 1.92  |
| A018343_01 | At5g57280 | protein carboxyl methylase-lik   | 0 | -0.43 | -0.66 | -0.56 | -1.21 | -1.30 | -1.28 | 1.2 | 0.06 | 2.66  | 0.47  |
| A018348_01 | At5g56550 | putative protein; protein id: At | 0 | 2.37  | 2.05  | 2.16  | 2.00  | 2.13  | 2.14  | 1.0 | 0.20 | -1.65 | 1.10  |
| A018393_01 | At5g50410 | unknown protein; protein id: A   | 0 | -0.84 | -1.05 | -0.92 | -0.77 | -0.66 | -0.85 | 0.7 | 2.21 | 2.15  | -1.79 |
| A018395_01 | At5g40770 | prohibitin (gb AAC49691.1); p    | 0 | -1.09 | -1.15 | -1.02 | -1.37 | -1.51 | -1.39 | 0.9 | 0.37 | 2.72  | -0.66 |
| A018423_01 | At5g58120 | disease resistance protein (TI   | 0 | 1.30  | 1.86  | 1.89  | 2.07  | 1.94  | 2.31  | 1.3 | 0.06 | -2.02 | 0.17  |
| A018427_01 | At5g59400 | putative protein; protein id: At | 0 | 1.06  | 1.06  | 1.08  | 1.14  | 1.23  | 1.70  | 1.2 | 0.06 | -1.92 | 0.18  |
| A018428_01 | At5g59480 | putative ripening-related prote  | 0 | -1.16 | -1.35 | -1.37 | -2.12 | -1.95 | -1.69 | 1.1 | 0.14 | 2.71  | -0.31 |
| A018440_01 | At5g47140 | GATA zinc finger protein; proi   | 0 | 0.01  | 0.24  | 0.58  | 0.82  | 0.88  | 1.10  | 0.7 | 2.21 | -1.74 | -1.40 |
| A018450_01 | At5g48490 | putative protein; protein id: At | 0 | 0.66  | 0.13  | -0.72 | -2.01 | -2.50 | -2.03 | 1.6 | 0.06 | 2.15  | 1.43  |
| A018460_01 | At5g48140 | polygalacturonase, putative; p   | 0 | -0.12 | 0.30  | 0.60  | 0.52  | 0.81  | 1.10  | 0.7 | 1.61 | -1.63 | -1.36 |
| A018467_01 | At5g52250 | G-protein beta-subunit (transc   | 0 | 1.11  | 0.30  | -0.72 | -1.12 | NA    | -1.09 | 0.7 | 1.20 | NA    | NA    |
| A018506_01 | At5g16070 | TCP-1 chaperonin-like proteir    | 0 | -0.66 | -1.34 | -1.24 | -1.62 | -1.85 | -1.92 | 1.4 | 0.06 | 2.78  | 0.09  |
| A018510_01 | At5g14970 | seed maturation-like protein; j  | 0 | 0.32  | 0.63  | 0.91  | 1.16  | 1.26  | 1.10  | 1.1 | 0.10 | -1.93 | -0.85 |
| A018516_01 | At5g15110 | pectate lyase -like protein; pro | 0 | 0.33  | 0.59  | 1.00  | 1.02  | 1.12  | 1.77  | 0.8 | 0.66 | -1.84 | -0.93 |
| A018531_01 | At5g59750 | GTP cyclohydrolase II / 3,4-di   | 0 | 1.18  | 1.40  | 1.39  | 1.05  | 1.55  | 1.38  | 1.0 | 0.20 | -1.73 | 0.76  |
| A018554_01 | At5g43130 | putative protein; protein id: At | 0 | 0.46  | 0.74  | 0.65  | 0.72  | 0.79  | 1.00  | 0.6 | 2.21 | -2.01 | -0.03 |
| A018564_01 | At5g04880 | unknown protein; protein id: A   | 0 | 0.85  | 0.91  | 1.10  | 1.22  | 1.59  | 1.36  | 0.9 | 0.37 | -1.98 | -0.28 |
| A018581_01 | At5g52450 | efflux family protein, putative; | 0 | 0.71  | 1.20  | 1.42  | 1.47  | 1.63  | 1.78  | 1.4 | 0.06 | -2.05 | -0.35 |
| A018607_01 | At5g54530 | putative protein; protein id: At | 0 | 0.07  | 0.94  | 1.65  | 1.92  | 1.81  | 1.25  | 0.9 | 0.41 | -1.65 | -0.91 |
| A018625_01 | At5g12400 | putative protein; protein id: At | 0 | 1.87  | 2.30  | 2.34  | 2.60  | 2.68  | 2.80  | 1.7 | 0.06 | -2.03 | 0.25  |
| A018628_01 | At5g07920 | diacylglycerol kinase (ATDGK     | 0 | 0.33  | 0.46  | 0.59  | 0.70  | 0.80  | 1.05  | 1.0 | 0.18 | -1.97 | -0.70 |
| A018630_01 | At5g05860 | glucuronosyl transferase-like    | 0 | 0.59  | 1.03  | 0.91  | 0.95  | 0.77  | 1.03  | 0.8 | 0.55 | -1.72 | 0.57  |
| A018635_01 | At5g61980 | GCN4-complementing proteir       | 0 | -0.21 | -0.06 | -0.55 | -0.83 | -1.03 | -1.25 | 0.7 | 1.61 | 2.37  | 1.01  |
| A018637_01 | At5g52630 | selenium-binding protein-like;   | 0 | 1.32  | 1.41  | 1.38  | 1.38  | 1.38  | 1.55  | 1.4 | 0.06 | -1.84 | 0.82  |
| A018638_01 | At5g46220 | putative protein; protein id: At | 0 | -1.34 | -1.66 | -1.64 | -2.01 | -2.13 | -1.98 | 1.0 | 0.16 | 2.77  | -0.56 |
| A018655_01 | At5g52950 | putative protein; protein id: At | 0 | 0.20  | 0.93  | 1.61  | 1.91  | 1.93  | 2.04  | 1.0 | 0.16 | -1.86 | -1.06 |
| A018662_01 | At5g35540 | putative protein; protein id: At | 0 | -1.09 | -1.48 | -1.45 | -1.74 | -1.73 | -2.32 | 0.8 | 0.55 | 2.79  | -0.30 |
| A018672_01 | At5g35170 | adenylate kinase -like protein   | 0 | 0.25  | 0.48  | 0.89  | 1.73  | 1.47  | 1.03  | 0.9 | 0.27 | -1.61 | -0.96 |
| A018673_01 | At5g01920 | putative protein; protein id: At | 0 | 2.36  | 2.32  | 1.71  | 0.85  | 0.81  | 0.50  | 1.6 | 0.06 | 0.06  | 2.15  |
| A018694_01 | At5g22550 | putative protein; protein id: At | 0 | -0.89 | -1.25 | -1.12 | -1.48 | -0.97 | -1.88 | 0.8 | 0.66 | 2.59  | -0.50 |

|            |           |                                  |   |       |       |       |       |       |       |     |      |       |       |
|------------|-----------|----------------------------------|---|-------|-------|-------|-------|-------|-------|-----|------|-------|-------|
| A018709_01 | At5g44780 | unknown protein; protein id: A   | 0 | -0.12 | 0.17  | 0.47  | 1.07  | 1.18  | 2.07  | 1.4 | 0.06 | -1.40 | -1.58 |
| A018711_01 | At5g44820 | putative protein; protein id: At | 0 | 0.18  | 0.49  | -0.07 | -0.86 | -1.30 | -0.90 | 0.9 | 0.41 | 1.78  | 1.49  |
| A018715_01 | At5g10750 | putative protein; protein id: At | 0 | 1.22  | 1.61  | 1.71  | 2.06  | 2.39  | 2.74  | 1.7 | 0.06 | -2.04 | -0.40 |
| A018753_01 | At5g05220 | expressed protein; protein id:   | 0 | 0.70  | 0.84  | 0.94  | 1.24  | 1.30  | 1.26  | 0.9 | 0.41 | -2.01 | -0.34 |
| A018781_01 | At5g17670 | putative protein; protein id: At | 0 | 0.21  | 1.41  | 1.61  | 0.84  | 1.08  | 1.84  | 1.1 | 0.14 | -1.46 | -0.15 |
| A018803_01 | At5g65430 | 14-3-3 protein GF14 kappa (c     | 0 | -1.80 | -1.91 | -1.08 | -1.20 | -1.40 | -1.23 | 1.2 | 0.06 | 1.88  | -2.10 |
| A018807_01 | At5g40200 | DegP protease; protein id: At    | 0 | -0.73 | -0.75 | -0.65 | -0.70 | -1.06 | -0.78 | 0.9 | 0.41 | 2.54  | -0.91 |
| A018818_01 | At5g41700 | E2, ubiquitin-conjugating enzy   | 0 | 0.77  | 0.79  | 1.03  | 0.95  | 0.92  | 1.22  | 0.6 | 4.47 | -2.00 | 0.21  |
| A018823_01 | At5g40960 | putative protein; protein id: At | 0 | 0.19  | 0.97  | 1.68  | 2.35  | 2.48  | 2.46  | 1.5 | 0.06 | -1.82 | -1.26 |
| A018827_01 | At5g54870 | putative protein; protein id: At | 0 | 1.12  | 1.40  | 1.64  | 1.86  | 1.97  | 2.39  | 1.3 | 0.06 | -2.06 | -0.30 |
| A018834_01 | At5g64880 | expressed protein; protein id:   | 0 | 0.83  | 0.68  | 0.82  | 1.03  | 0.81  | 0.48  | 1.0 | 0.18 | -1.32 | 0.89  |
| A018841_01 | At5g57040 | putative protein; protein id: At | 0 | 0.67  | 1.08  | 1.19  | 1.53  | 1.54  | 1.52  | 1.7 | 0.06 | -2.04 | -0.38 |
| A018844_01 | At5g43940 | alcohol dehydrogenase (EC 1      | 0 | -0.73 | -0.80 | -0.88 | -1.01 | -1.16 | -1.19 | 1.3 | 0.06 | 2.80  | -0.38 |
| A018849_01 | At5g39360 | putative protein; protein id: At | 0 | 0.02  | -0.28 | -0.53 | -2.02 | -1.10 | -0.96 | 0.6 | 4.47 | 2.08  | 0.84  |
| A018869_01 | At5g60670 | 60S ribosomal protein L12 - li   | 0 | -0.76 | -1.46 | -1.31 | -2.34 | -2.72 | -2.78 | 0.9 | 0.27 | 2.71  | 0.48  |
| A018891_01 | At5g20630 | germin-like protein; protein id  | 0 | -0.27 | -2.59 | -3.01 | NA    | -4.67 | -4.39 | 1.0 | 0.20 | NA    | NA    |
| A018909_01 | At5g64140 | 40S ribosomal protein S28 (s     | 0 | -1.17 | -1.44 | -1.24 | -1.85 | -2.03 | -2.06 | 1.6 | 0.06 | 2.81  | -0.25 |
| A018911_01 | At5g19140 | aluminium-induced protein - li   | 0 | 1.27  | 2.02  | 2.52  | 2.87  | 2.57  | 3.03  | 1.4 | 0.06 | -2.03 | -0.30 |
| A018915_01 | At5g65440 | putative protein; protein id: At | 0 | -0.69 | -0.85 | -1.29 | -1.75 | -1.98 | -2.07 | 1.2 | 0.06 | 2.72  | 0.47  |
| A018921_01 | At5g49920 | unknown protein; protein id: A   | 0 | -0.17 | 0.32  | 0.52  | 0.45  | 0.83  | 1.02  | 0.7 | 1.61 | -1.58 | -1.40 |
| A018922_01 | At5g44340 | putative tubulin beta-4 chain    | 0 | -0.53 | -0.70 | -0.68 | -0.79 | -1.15 | -0.83 | 0.9 | 0.37 | 2.64  | -0.18 |
| A018925_01 | At5g46180 | ornithine aminotransferase; p    | 0 | 0.84  | 0.73  | 0.90  | 0.91  | 0.92  | 1.35  | 0.7 | 1.20 | -1.88 | 0.08  |
| A018932_01 | At5g04140 | ferredoxin-dependent glutam;     | 0 | 0.48  | 0.86  | 0.73  | 0.80  | 0.32  | 1.17  | 0.7 | 0.96 | -1.46 | 0.35  |
| A018933_01 | At5g13550 | sulfate transporter; protein id: | 0 | 0.26  | 0.63  | 0.80  | 0.90  | 1.18  | 1.94  | 1.3 | 0.06 | -1.74 | -1.03 |
| A018934_01 | At5g58410 | unknown protein; protein id: A   | 0 | 1.95  | 1.93  | 1.40  | 0.66  | 0.49  | 0.43  | 1.8 | 0.06 | 0.14  | 2.17  |
| A018935_01 | At5g50800 | MtN3-like protein; protein id: / | 0 | 0.46  | 1.60  | 2.42  | 2.68  | 2.65  | 3.24  | 0.6 | 4.47 | -1.90 | -0.88 |
| A018937_01 | At5g41800 | amino acid permease-like pro     | 0 | 1.15  | 2.03  | 2.56  | 2.79  | 3.06  | 3.65  | 0.7 | 1.61 | -2.02 | -0.60 |
| A018949_01 | At5g22270 | putative protein; protein id: At | 0 | 1.73  | 1.06  | 1.44  | 1.99  | 1.76  | 1.30  | 1.2 | 0.06 | -1.52 | 0.45  |
| A018955_01 | At5g36890 | glycosyl hydrolase family 1; p   | 0 | -0.80 | -0.86 | -0.92 | -0.95 | -0.98 | -1.01 | 0.9 | 0.27 | 2.66  | -0.96 |
| A018964_01 | At5g56180 | putative protein; protein id: At | 0 | 1.01  | 1.06  | 1.11  | 1.00  | 1.10  | 1.17  | 0.6 | 4.47 | -1.86 | 0.77  |
| A018974_01 | At5g23340 | putative protein; protein id: At | 0 | 1.13  | 0.65  | 0.44  | 0.31  | 0.19  | 0.39  | 0.6 | 4.47 | 0.14  | 1.93  |
| A019000_01 | At5g67370 | putative protein; protein id: At | 0 | 1.13  | 1.48  | 1.67  | 1.49  | 1.79  | 1.85  | 1.3 | 0.06 | -1.97 | 0.25  |
| A019014_01 | At5g47560 | sodium-dicarboxylate cotrans     | 0 | 1.18  | 1.59  | 1.80  | 1.74  | 2.09  | 2.56  | 1.8 | 0.06 | -2.03 | -0.17 |
| A019027_01 | At5g13980 | glycosyl hydrolase family 38 (   | 0 | -0.01 | -0.39 | -0.65 | -1.08 | -1.53 | -1.51 | 0.7 | 1.61 | 2.47  | 1.04  |
| A019041_01 | xxxx      | b/t putative protein; protein id | 0 | -0.68 | -0.85 | -0.90 | -0.77 | -0.79 | -1.25 | 0.6 | 4.47 | 2.59  | -0.76 |
| A019046_01 | At5g57630 | SNF1 related protein kinase-I    | 0 | 1.59  | 2.12  | 2.34  | 2.71  | 2.42  | 2.41  | 1.2 | 0.06 | -1.99 | 0.18  |
| A019047_01 | At5g65900 | DEAD/DEAH box RNA helica         | 0 | -0.50 | -0.48 | -0.58 | -1.07 | -0.98 | -1.07 | 0.7 | 1.20 | 2.67  | 0.29  |
| A019053_01 | At5g41520 | putative protein; protein id: At | 0 | -0.17 | -0.43 | -0.41 | -0.95 | -1.03 | -0.97 | 0.7 | 2.21 | 2.55  | 0.76  |
| A019057_01 | At5g43260 | expressed protein; protein id:   | 0 | 1.48  | 1.94  | 1.90  | 2.11  | 2.23  | 2.44  | 2.1 | 0.06 | -2.04 | 0.16  |
| A019074_01 | At5g09570 | putative protein; protein id: At | 0 | -1.22 | -1.23 | -0.67 | -1.20 | -0.92 | -0.54 | 0.7 | 1.20 | 1.57  | -1.90 |
| A019086_01 | At5g15140 | putative aldose 1-epimerase -    | 0 | 0.38  | 0.65  | 1.03  | 1.02  | 1.24  | 1.51  | 1.0 | 0.16 | -1.94 | -0.79 |
| A019127_01 | At5g61130 | glycosyl hydrolase family 17; j  | 0 | -1.59 | -1.71 | -1.77 | -1.93 | -1.84 | -1.93 | 1.0 | 0.20 | 2.66  | -1.02 |
| A019145_01 | At5g22740 | glucosyltransferase-like prote   | 0 | -0.57 | -1.55 | -1.73 | -2.06 | -2.49 | -2.40 | 1.1 | 0.10 | 2.71  | 0.30  |
| A019174_01 | At5g54730 | putative protein; protein id: At | 0 | 1.89  | 2.18  | 2.00  | 2.03  | 2.10  | 2.75  | 2.0 | 0.06 | -1.91 | 0.52  |



|            |           |                                  |   |       |       |       |       |       |       |     |      |       |       |
|------------|-----------|----------------------------------|---|-------|-------|-------|-------|-------|-------|-----|------|-------|-------|
| A019187_01 | At5g60960 | putative protein; protein id: At | 0 | -0.58 | -0.74 | -0.85 | -1.25 | -1.57 | -1.33 | 0.9 | 0.41 | 2.69  | 0.32  |
| A019213_01 | At5g51180 | unknown protein                  | 0 | 0.73  | 1.12  | 1.08  | 1.61  | 1.39  | 1.57  | 0.8 | 0.66 | -2.01 | -0.32 |
| A019247_01 | At5g06860 | polygalacturonase inhibiting p   | 0 | 1.53  | 2.26  | 1.96  | 1.92  | 1.95  | 1.63  | 1.2 | 0.06 | -1.60 | 0.95  |
| A019252_01 | At5g11060 | homeobox protein knotted-1 l     | 0 | 1.22  | 1.72  | 1.80  | 2.19  | 2.08  | 2.11  | 1.4 | 0.06 | -2.03 | 0.01  |
| A019261_01 | At5g55230 | putative protein; protein id: At | 0 | -0.70 | -0.82 | -0.81 | -0.95 | -1.28 | -1.38 | 1.0 | 0.20 | 2.76  | -0.11 |
| A019281_01 | At5g14420 | putative protein; protein id: At | 0 | 1.17  | 0.96  | 0.66  | 0.32  | 0.26  | 0.65  | 0.8 | 0.66 | -0.17 | 2.02  |
| A019305_01 | At5g37300 | putative protein; protein id: At | 0 | -0.87 | -1.78 | -1.49 | -2.19 | -3.08 | -3.49 | 0.9 | 0.41 | 2.70  | 0.39  |
| A019324_01 | At5g23310 | iron superoxide dismutase (F     | 0 | -0.96 | -1.50 | -1.50 | -1.77 | -1.78 | -2.29 | 1.1 | 0.10 | 2.78  | -0.22 |
| A019361_01 | At5g16680 | putative protein; protein id: At | 0 | 0.66  | 0.86  | 0.82  | 0.67  | 0.21  | 1.09  | 0.7 | 0.96 | -1.14 | 0.91  |
| A019383_01 | At5g14880 | putative cation transport prote  | 0 | 0.93  | 1.38  | 1.25  | 1.69  | 1.39  | 1.65  | 1.6 | 0.06 | -1.98 | 0.16  |
| A019395_01 | At5g39400 | PTEN -like protein; protein id:  | 0 | 0.06  | 0.24  | 0.74  | 0.71  | 0.72  | 1.23  | 0.7 | 1.61 | -1.69 | -1.24 |
| A019398_01 | At5g04430 | KH domain protein Nova, puti     | 0 | -0.05 | -0.36 | -0.58 | -0.93 | -1.36 | -1.22 | 0.7 | 1.61 | 2.47  | 1.00  |
| A019423_01 | At5g52360 | actin depolymerizing factor-lik  | 0 | -0.11 | 0.18  | 0.51  | 0.38  | 0.85  | 1.07  | 0.8 | 0.66 | -1.53 | -1.45 |
| A019443_01 | At1g09760 | putative U2 small nuclear ribc   | 0 | -0.71 | -1.05 | -0.89 | -0.85 | -0.59 | -0.76 | 0.8 | 0.48 | 2.12  | -1.69 |
| A019444_01 | At3g08690 | E2, ubiquitin-conjugating enzy   | 0 | 0.43  | 0.68  | 0.95  | 1.15  | 1.12  | 1.47  | 0.8 | 0.96 | -1.97 | -0.79 |
| A019447_01 | At1g68990 | DNA-directed RNA polymeras       | 0 | -0.80 | -0.74 | -0.60 | -1.37 | -1.35 | -1.27 | 0.7 | 1.20 | 2.57  | 0.05  |
| A019456_01 | At1g10210 | putative mitogen-activated pro   | 0 | 0.72  | 0.64  | 0.79  | 1.13  | 1.00  | 0.95  | 0.9 | 0.27 | -1.91 | -0.07 |
| A019457_01 | At2g18170 | MAP kinase (ATMPK7); prote       | 0 | 0.60  | 0.75  | 0.98  | 1.04  | 1.20  | 1.50  | 1.1 | 0.14 | -2.01 | -0.54 |
| A019466_01 | At5g54250 | cyclic nucleotide-regulated ion  | 0 | 1.40  | 1.70  | 1.69  | 1.34  | 1.31  | 1.72  | 1.0 | 0.20 | -1.63 | 1.03  |
| A019469_01 | At4g34870 | peptidylprolyl isomerase (cycl   | 0 | -0.84 | -0.93 | -0.94 | -1.17 | -1.44 | -1.47 | 1.3 | 0.06 | 2.77  | -0.19 |
| A019472_01 | At1g65480 | flowering signals mediating pi   | 0 | 1.00  | 2.32  | 3.56  | 4.08  | 4.29  | 4.93  | 2.5 | 0.06 | -1.95 | -0.93 |
| A019474_01 | At1g55560 | pectinesterase (pectin methyl    | 0 | 0.37  | 0.83  | 1.20  | 1.14  | 1.55  | 1.93  | 1.2 | 0.06 | -1.90 | -0.90 |
| A019480_01 | At3g57490 | 40S ribosomal protein S2 hor     | 0 | -0.77 | -1.22 | -1.14 | -1.76 | -1.69 | -1.88 | 1.0 | 0.16 | 2.79  | 0.05  |
| A019491_01 | At3g59970 | methylenetetrahydrofolate rec    | 0 | -1.26 | -1.49 | -1.46 | -1.16 | -1.54 | -1.95 | 0.7 | 1.61 | 2.61  | -0.88 |
| A019496_01 | At1g09210 | putative calcium-binding prote   | 0 | -1.59 | -1.49 | -1.56 | -1.80 | -1.78 | -1.91 | 0.9 | 0.31 | 2.69  | -0.91 |
| A019510_01 | At4g19640 | GTP-binding protein, putative    | 0 | 0.49  | 0.56  | 0.62  | 1.02  | 1.04  | 0.94  | 0.8 | 0.81 | -1.95 | -0.56 |
| A019515_01 | At4g17840 | expressed protein; protein id:   | 0 | 1.14  | 1.37  | 1.53  | 1.71  | 1.91  | 2.31  | 1.5 | 0.06 | -2.05 | -0.23 |
| A019517_01 | At4g18030 | putative protein; protein id: At | 0 | -0.63 | -0.56 | -0.63 | -0.96 | -1.20 | -1.19 | 0.7 | 1.61 | 2.60  | 0.21  |
| A019520_01 | At4g21900 | putative protein; protein id: At | 0 | -0.06 | 0.07  | 0.75  | 0.88  | 1.18  | 1.62  | 0.8 | 0.81 | -1.57 | -1.53 |
| A019524_01 | At4g34990 | myb family transcription facto   | 0 | -1.03 | -1.00 | -0.85 | -0.29 | -0.22 | 0.18  | 0.6 | 4.47 | 0.20  | -2.51 |
| A019532_01 | At4g19690 | Fe(II) transport protein; protei | 0 | -1.68 | -1.17 | -0.95 | -0.56 | -0.63 | -0.17 | 0.7 | 1.61 | 0.60  | -2.49 |
| A019544_01 | At4g25170 | putative protein; protein id: At | 0 | 1.76  | 1.75  | 1.46  | 0.96  | 0.84  | 1.32  | 0.9 | 0.31 | -0.84 | 1.86  |
| A019560_01 | At4g26060 | putative protein; protein id: At | 0 | 1.05  | 1.40  | 1.59  | 1.84  | 2.10  | 2.18  | 0.6 | 4.47 | -2.06 | -0.35 |
| A019562_01 | At4g31840 | putative protein; protein id: At | 0 | -2.91 | -3.56 | -1.18 | -3.76 | -3.48 | -3.37 | 1.2 | 0.06 | 2.61  | -1.11 |
| A019566_01 | At4g12600 | ribosomal protein L7Ae -like;    | 0 | -1.44 | -1.51 | -1.28 | -2.08 | -2.17 | -2.26 | 1.3 | 0.06 | 2.74  | -0.29 |
| A019572_01 | At4g23850 | acyl-CoA synthetase - like pro   | 0 | 0.31  | 0.65  | 0.72  | 0.84  | 0.81  | 1.22  | 0.7 | 1.61 | -1.93 | -0.53 |
| A019576_01 | At4g29100 | putative protein; protein id: At | 0 | 0.34  | 0.68  | 0.99  | 1.05  | 1.06  | 1.82  | 1.1 | 0.14 | -1.83 | -0.87 |
| A019580_01 | At4g01410 | synaptobrevin VAMP713; pro       | 0 | 0.10  | -0.32 | -0.51 | -0.90 | -1.01 | -1.07 | 0.8 | 0.66 | 2.46  | 1.01  |
| A019587_01 | At4g09030 | arabinogalactan-protein (AGF     | 0 | 1.24  | 1.43  | 0.78  | -0.34 | -0.61 | -0.05 | 1.0 | 0.14 | 0.97  | 2.02  |
| A019591_01 | At4g15440 | hydroperoxide lyase (HPOL) l     | 0 | 0.08  | -0.11 | -0.72 | -0.98 | -1.65 | -2.17 | 1.0 | 0.14 | 2.24  | 1.20  |
| A019602_01 | At5g01620 | putative protein; protein id: At | 0 | -1.00 | -1.52 | -1.53 | -1.35 | -1.52 | -1.97 | 0.7 | 1.61 | 2.70  | -0.62 |
| A019608_01 | At3g45970 | putative protein; protein id: At | 0 | 1.60  | 1.65  | 0.82  | -0.19 | -0.74 | -0.56 | 1.5 | 0.06 | 1.13  | 2.08  |
| A019611_01 | At5g02230 | putative protein; protein id: At | 0 | 1.88  | 1.29  | 0.87  | 0.23  | -0.21 | 0.72  | 0.9 | 0.31 | 0.41  | 2.05  |
| A019617_01 | At5g04770 | amino acid transport - like pro  | 0 | 1.05  | 0.84  | 0.53  | 0.62  | 0.69  | 0.85  | 0.7 | 2.21 | -1.14 | 1.28  |

|            |           |                                                       |   |       |       |       |       |       |       |     |      |       |       |
|------------|-----------|-------------------------------------------------------|---|-------|-------|-------|-------|-------|-------|-----|------|-------|-------|
| A019625_01 | At1g04120 | ABC transporter family protein                        | 0 | 0.36  | 0.23  | -0.20 | -0.83 | -1.36 | -0.44 | 1.0 | 0.26 | 1.78  | 1.41  |
| A019630_01 | At3g16780 | putative ribosomal protein; pr                        | 0 | -0.92 | -1.14 | -1.00 | -1.55 | -1.20 | -1.55 | 0.9 | 0.27 | 2.72  | -0.46 |
| A019633_01 | At3g22850 | unknown protein; protein id: A                        | 0 | -1.73 | -1.38 | -1.27 | -1.25 | -0.59 | -0.45 | 0.8 | 0.96 | 1.03  | -2.39 |
| A019636_01 | xxxx      | b/t protein phosphatase 2A re                         | 0 | 0.42  | 0.79  | 1.03  | 1.34  | 1.14  | 1.45  | 0.7 | 2.21 | -1.98 | -0.67 |
| A019638_01 | At3g25220 | immunophilin (FKBP15-1); pr                           | 0 | -1.10 | -1.07 | -1.14 | -1.17 | -1.19 | -1.25 | 0.9 | 0.37 | 2.63  | -1.11 |
| A019640_01 | At5g41060 | putative protein; protein id: At                      | 0 | -1.19 | -1.50 | -1.54 | -1.42 | -1.77 | NA    | 0.8 | 0.96 | NA    | NA    |
| A019641_01 | At3g28900 | 60S ribosomal protein L34, pr                         | 0 | -0.82 | -1.22 | -1.15 | -1.75 | -2.05 | -2.04 | 0.9 | 0.27 | 2.78  | 0.18  |
| A019642_01 | At5g48880 | 3-keto-acyl-CoA thiolase 2 (gl                        | 0 | -2.29 | -2.05 | -1.86 | -1.64 | -1.59 | -1.48 | 0.6 | 2.21 | 1.90  | -2.09 |
| A019649_01 | At5g43970 | putative protein; protein id: At                      | 0 | -0.92 | -0.99 | -0.89 | -0.92 | -0.80 | -1.04 | 0.7 | 1.20 | 2.47  | -1.43 |
| A019650_01 | At5g55180 | glycosyl hydrolase family 17; j                       | 0 | -1.50 | -0.43 | -0.43 | -0.50 | -0.48 | -0.85 | 0.6 | 4.47 | 1.05  | -1.54 |
| A019659_01 | At5g51640 | putative protein; protein id: At                      | 0 | 1.13  | 1.25  | 1.01  | 0.76  | 0.92  | 1.36  | 1.2 | 0.06 | -1.50 | 1.12  |
| A019663_01 | At3g23570 | expressed protein; protein id:                        | 0 | 0.61  | 1.12  | 1.09  | 1.64  | 1.87  | 1.99  | 0.8 | 0.55 | -2.01 | -0.72 |
| A019668_01 | At3g19030 | expressed protein; protein id:                        | 0 | 1.81  | 2.57  | 2.64  | 2.25  | 2.17  | 2.18  | 1.4 | 0.06 | -1.65 | 0.90  |
| A019672_01 | At5g04940 | SET-domain protein-like; prot                         | 0 | -0.91 | -1.02 | -0.69 | -0.45 | -0.19 | -0.31 | 1.0 | 0.16 | 0.79  | -2.52 |
| A019680_01 | At5g24420 | 6-phosphogluconolactonase-l                           | 0 | -2.31 | -2.92 | -2.71 | -3.76 | -3.63 | -3.46 | 0.8 | 0.48 | 2.76  | -0.54 |
| A019686_01 | At5g53030 | putative protein; protein id: At                      | 0 | 0.56  | 1.26  | 1.52  | 1.80  | 1.63  | 1.99  | 1.0 | 0.18 | -1.98 | -0.54 |
| A019692_01 | At5g63580 | flavonol synthase; protein id: .                      | 0 | 1.20  | 1.76  | 2.75  | 4.11  | 4.18  | 3.68  | 0.8 | 0.81 | -1.90 | -0.89 |
| A019698_01 | At5g63790 | putative protein; protein id: At                      | 0 | 1.30  | 1.95  | 2.05  | 2.35  | 2.41  | 3.04  | 1.4 | 0.06 | -2.05 | -0.25 |
| A019699_01 | At5g44090 | protein phosphatase 2A 62 kD                          | 0 | 0.51  | 0.56  | 0.61  | 0.74  | 0.77  | 1.00  | 1.0 | 0.16 | -2.03 | -0.20 |
| A019710_01 | At5g23900 | 60S ribosomal protein L13; pr                         | 0 | -0.35 | -0.73 | -0.90 | -1.60 | -1.84 | -1.85 | 0.7 | 1.20 | 2.62  | 0.74  |
| A019718_01 | At5g53880 | expressed protein; protein id:                        | 0 | -0.27 | -0.67 | -0.75 | -1.34 | -2.16 | -1.92 | 1.2 | 0.06 | 2.53  | 0.83  |
| A019724_01 | At5g44580 | expressed protein; protein id:                        | 0 | 1.81  | 2.58  | 2.43  | 2.33  | 2.24  | 2.36  | 1.1 | 0.06 | -1.79 | 0.77  |
| A019725_01 | At5g54510 | auxin-responsive-like protein;                        | 0 | 1.08  | 1.18  | 0.75  | 0.13  | 0.07  | 0.04  | 1.2 | 0.06 | 0.56  | 2.18  |
| A019741_01 | At5g01240 | LAX1 / AUX1 -like permease;                           | 0 | -0.34 | -0.87 | -1.10 | -1.15 | -1.16 | -1.51 | 1.1 | 0.14 | 2.58  | 0.08  |
| A019744_01 | At5g15050 | N-acetylglucosaminyltransfer                          | 0 | -0.61 | -0.61 | -0.70 | -0.36 | -0.46 | -1.13 | 0.6 | 4.47 | 2.13  | -0.82 |
| A019758_01 | At4g13770 | cytochrome p450 family; prot                          | 0 | 0.04  | 1.67  | 2.95  | 3.35  | 3.34  | 4.16  | 1.7 | 0.06 | -1.81 | -1.18 |
| A019761_01 | At1g04680 | putative pectate lyase A11; pr                        | 0 | -0.70 | -0.63 | -1.20 | -1.74 | -2.08 | -1.96 | 1.0 | 0.14 | 2.63  | 0.59  |
| A019766_01 | At5g27430 | signal peptidase; protein id: A                       | 0 | -0.68 | -0.75 | -0.75 | -0.62 | -0.59 | -1.13 | 0.7 | 1.20 | 2.44  | -0.92 |
| A019771_01 | At2g22670 | auxin-regulated protein (IAA8                         | 0 | -1.02 | -1.36 | -1.22 | -1.26 | -1.49 | -1.54 | 0.8 | 0.66 | 2.73  | -0.79 |
| A019781_01 | At2g46830 | myb-related transcription fact                        | 0 | 0.54  | 0.96  | 1.28  | 1.26  | 1.29  | 2.21  | 0.8 | 0.66 | -1.85 | -0.60 |
| A019785_01 | At1g13210 | potential phospholipid-transp                         | 0 | 0.11  | 1.01  | 1.21  | 1.60  | 1.55  | 1.57  | 0.9 | 0.41 | -1.85 | -0.94 |
| A019810_01 | At1g18720 | expressed protein; protein id:                        | 0 | 0.25  | 0.56  | 0.87  | 0.95  | 0.84  | 1.03  | 0.8 | 0.55 | -1.94 | -0.68 |
| A019812_01 | At3g51860 | Ca <sup>2+</sup> /H <sup>+</sup> -exchanging protein- | 0 | 1.90  | 2.35  | 2.45  | 2.31  | 2.32  | 2.94  | 1.1 | 0.06 | -1.95 | 0.46  |
| A019813_01 | At1g33040 | expressed protein; protein id:                        | 0 | -1.21 | -1.42 | -1.40 | -1.53 | -1.26 | -1.50 | 0.9 | 0.26 | 2.62  | -1.12 |
| A019815_01 | At1g04780 | hypothetical protein; protein ic                      | 0 | 0.53  | 0.71  | 0.70  | 0.69  | 0.70  | 1.16  | 1.0 | 0.20 | -1.88 | -0.01 |
| A019828_01 | At2g29390 | putative C-4 sterol methyl oxi                        | 0 | -0.41 | -0.93 | -0.84 | -1.01 | -0.95 | -1.18 | 0.7 | 2.21 | 2.71  | -0.25 |
| A019831_01 | At2g45910 | putative protein kinase; protei                       | 0 | 0.51  | 0.95  | 1.11  | 1.28  | 1.50  | 1.44  | 0.6 | 4.47 | -2.02 | -0.58 |
| A019834_01 | At2g35120 | glycine decarboxylase comple                          | 0 | -0.48 | -0.93 | -0.78 | -0.47 | -0.99 | -1.23 | 0.7 | 0.96 | 2.45  | -0.44 |
| A019858_01 | At2g39010 | putative aquaporin (water cha                         | 0 | -0.42 | -0.47 | -0.89 | -1.08 | -1.25 | -1.60 | 0.8 | 0.81 | 2.64  | 0.57  |
| A019861_01 | At2g37470 | putative histone H2B; protein                         | 0 | -1.47 | -1.33 | -0.94 | -0.54 | -0.44 | -0.53 | 0.9 | 0.27 | 0.85  | -2.59 |
| A019866_01 | At2g37020 | translin-like protein; protein id                     | 0 | -1.45 | -1.79 | -1.45 | -1.30 | -1.37 | -1.57 | 0.7 | 1.61 | 2.35  | -1.60 |
| A019872_01 | At2g01820 | putative receptor-like protein l                      | 0 | -0.07 | -0.19 | -0.31 | -0.84 | -1.02 | -0.59 | 0.9 | 0.37 | 2.27  | 0.96  |
| A019874_01 | At2g01890 | putative purple acid phosphat                         | 0 | 3.08  | 3.14  | 3.34  | 3.64  | 3.68  | 3.62  | 1.3 | 0.06 | -1.94 | 0.54  |
| A019882_01 | At2g20490 | expressed protein; protein id:                        | 0 | -0.74 | -1.21 | -0.92 | -1.47 | -1.51 | -1.64 | 0.9 | 0.37 | 2.80  | -0.14 |

|            |           |                                   |   |       |       |       |       |       |       |     |      |       |       |
|------------|-----------|-----------------------------------|---|-------|-------|-------|-------|-------|-------|-----|------|-------|-------|
| A019885_01 | At2g21580 | 40S ribosomal protein S25; p      | 0 | -0.71 | -0.96 | -0.92 | -1.37 | -1.41 | -1.38 | 1.0 | 0.18 | 2.80  | -0.10 |
| A019887_01 | At2g36160 | 40S ribosomal protein S14; p      | 0 | -0.66 | -1.10 | -1.02 | -1.52 | -1.61 | -1.66 | 1.1 | 0.10 | 2.80  | 0.09  |
| A019892_01 | At1g78290 | serine-threonine protein kinas    | 0 | 1.92  | 2.21  | 2.42  | 2.77  | 2.73  | 2.89  | 1.2 | 0.06 | -2.04 | 0.17  |
| A019893_01 | At1g64780 | ammonium transporter, putat       | 0 | 0.71  | 1.97  | 2.51  | 2.67  | 2.60  | 2.80  | 0.9 | 0.27 | -1.92 | -0.51 |
| A019926_01 | At1g77920 | bZIP transcription factor, bZIF   | 0 | 1.29  | 1.56  | 1.68  | 2.17  | 1.57  | 2.20  | 1.0 | 0.16 | -1.96 | 0.09  |
| A019934_01 | At3g16950 | dihydrolipoamide dehydrogen       | 0 | -0.02 | -0.26 | -0.46 | -0.81 | -1.18 | -1.16 | 1.1 | 0.14 | 2.46  | 1.03  |
| A019936_01 | At5g27770 | 60S ribosomal protein L22 - li    | 0 | -0.57 | -0.60 | -0.55 | -0.78 | -0.87 | -1.09 | 0.8 | 0.48 | 2.75  | -0.16 |
| A019940_01 | At1g06430 | FtsH protease, putative; prote    | 0 | 0.93  | 1.43  | 1.26  | 1.48  | 1.79  | 1.62  | 1.0 | 0.16 | -2.00 | 0.05  |
| A019941_01 | At1g60010 | expressed protein; protein id:    | 0 | 1.04  | 0.96  | 0.88  | 0.89  | 0.39  | 0.10  | 0.9 | 0.27 | -0.12 | 1.83  |
| A019942_01 | At1g07090 | expressed protein; protein id:    | 0 | -1.14 | -0.58 | -0.10 | 0.42  | 0.21  | -0.20 | 0.6 | 4.47 | -0.20 | -2.13 |
| A019952_01 | At1g55210 | disease resistance response       | 0 | -1.04 | -0.84 | -0.80 | -1.21 | -1.29 | -1.06 | 1.0 | 0.16 | 2.49  | -0.63 |
| A019954_01 | At1g71040 | spore coat protein-like proteir   | 0 | 1.45  | 1.77  | 1.64  | 1.57  | 1.75  | 1.90  | 1.5 | 0.06 | -1.87 | 0.71  |
| A019958_01 | At1g29970 | 60S ribosomal protein L18A, j     | 0 | 0.73  | 0.78  | 0.92  | 1.07  | 1.15  | 1.06  | 1.1 | 0.14 | -2.01 | -0.03 |
| A019964_01 | At1g74660 | expressed protein; protein id:    | 0 | 0.12  | 0.98  | 1.22  | 1.86  | 1.66  | 1.28  | 0.7 | 1.61 | -1.70 | -0.84 |
| A019971_01 | At3g01270 | putative pectate lyase; proteir   | 0 | 0.47  | 0.71  | 1.23  | 1.22  | 1.37  | 2.23  | 1.2 | 0.06 | -1.82 | -0.89 |
| A019975_01 | At3g01060 | unknown protin; protein id: At    | 0 | -0.05 | 0.32  | 0.56  | 0.92  | 1.10  | 0.98  | 0.9 | 0.41 | -1.72 | -1.41 |
| A019976_01 | At3g03780 | putative methionine synthase      | 0 | -0.69 | 0.21  | 0.97  | 2.37  | 1.51  | 1.23  | 0.6 | 4.47 | -1.25 | -1.43 |
| A019985_01 | At3g19800 | expressed protein; protein id:    | 0 | 0.89  | 0.98  | 0.99  | 1.29  | 1.40  | 1.37  | 1.4 | 0.06 | -2.03 | -0.04 |
| A019991_01 | At1g73230 | putative transcription factor B   | 0 | -0.79 | -1.17 | -1.15 | -1.42 | -1.37 | -1.55 | 1.1 | 0.10 | 2.81  | -0.35 |
| A019995_01 | At1g78070 | expressed protein; protein id:    | 0 | 0.02  | 0.46  | 0.62  | 0.79  | 0.94  | 1.19  | 0.6 | 4.47 | -1.81 | -1.21 |
| A020001_01 | At1g55490 | rubisco subunit binding-protei    | 0 | -1.07 | -1.47 | -1.43 | -1.60 | -1.62 | -2.16 | 0.8 | 0.66 | 2.78  | -0.40 |
| A020005_01 | At2g17840 | putative senescence-associa       | 0 | 0.69  | 1.31  | 1.23  | 0.88  | 0.41  | 0.74  | 0.6 | 4.47 | -0.91 | 1.39  |
| A020008_01 | At2g39420 | putative phospholipase; prote     | 0 | -0.35 | -0.16 | 0.54  | 0.78  | 1.08  | 1.75  | 1.3 | 0.06 | -1.36 | -1.78 |
| A020009_01 | At5g07220 | putative protein; protein id: At  | 0 | 1.23  | 1.31  | 1.36  | 1.74  | 1.45  | 1.85  | 0.8 | 0.81 | -1.99 | 0.26  |
| A020012_01 | At4g26590 | isp4 like protein; protein id: At | 0 | -0.81 | -1.93 | -1.38 | -1.57 | -1.99 | -2.15 | 0.8 | 0.66 | 2.67  | -0.29 |
| A020014_01 | At2g45470 | fasciclin-like arabinogalactan-   | 0 | -1.13 | -1.35 | -1.49 | -2.85 | -2.45 | -2.07 | 1.0 | 0.20 | 2.61  | 0.14  |
| A020016_01 | At4g17460 | homeobox-leucine zipper pro       | 0 | -0.67 | -1.11 | -1.14 | -1.94 | -1.99 | -2.05 | 1.2 | 0.06 | 2.75  | 0.33  |
| A020022_01 | At5g13750 | transporter-like protein          | 0 | 0.12  | 0.61  | 1.28  | 0.92  | 1.68  | 2.17  | 1.2 | 0.06 | -1.68 | -1.14 |
| A020033_01 | At3g21690 | integral membrane protein, pi     | 0 | 0.69  | 1.44  | 1.78  | 2.06  | 2.00  | 2.60  | 1.6 | 0.06 | -1.99 | -0.64 |
| A020037_01 | At1g32550 | ferredoxin, putative; protein ic  | 0 | -0.41 | -0.40 | -0.61 | -0.60 | -0.76 | -1.04 | 0.8 | 0.66 | 2.67  | 0.16  |
| A020039_01 | xxxx      | b/t hypothetical protein; protei  | 0 | -0.74 | -1.28 | -1.45 | -1.53 | -1.69 | -1.61 | 0.9 | 0.41 | 2.72  | -0.25 |
| A020045_01 | At3g26740 | light regulated protein, putativ  | 0 | 1.61  | 1.68  | 1.95  | 2.24  | 2.40  | 2.18  | 1.1 | 0.14 | -2.01 | 0.10  |
| A020048_01 | At2g19520 | putative WD-40 repeat proteir     | 0 | -1.06 | -1.15 | -1.03 | -1.14 | -1.03 | -1.04 | 1.1 | 0.14 | 2.46  | -1.45 |
| A020050_01 | At3g53900 | uracil phosphoribosyltransfer;    | 0 | -2.31 | -2.58 | -2.33 | -3.33 | -2.68 | NA    | 1.0 | 0.18 | NA    | NA    |
| A020053_01 | At3g14067 | subtilisin-like serine protease,  | 0 | 1.24  | 1.48  | 1.52  | 1.63  | 1.68  | 2.12  | 0.8 | 0.66 | -2.02 | 0.15  |
| A020054_01 | At3g56090 | putative protein; protein id: At  | 0 | -0.99 | -0.88 | -0.79 | -1.05 | -1.09 | -1.25 | 1.0 | 0.14 | 2.65  | -0.78 |
| A020055_01 | At5g66052 | expressed protein; protein id:    | 0 | 0.69  | 0.49  | 0.59  | 0.76  | 1.08  | 0.93  | 0.7 | 0.96 | -1.74 | -0.31 |
| A020062_01 | At1g54290 | protein translation factor Sui1   | 0 | 1.08  | 1.45  | 1.60  | 1.77  | 1.93  | 2.13  | 1.4 | 0.06 | -2.07 | -0.15 |
| A020064_01 | At4g24570 | mitochondrial carrier proteir f   | 0 | 1.13  | 1.81  | 1.79  | 1.67  | 1.09  | 1.33  | 1.4 | 0.06 | -1.37 | 1.01  |
| A020065_01 | At5g62680 | peptide transporter; protein id   | 0 | 0.78  | 1.67  | 1.89  | 1.74  | 1.47  | 2.31  | 1.0 | 0.20 | -1.85 | -0.05 |
| A020070_01 | At1g22740 | ras-related GTP-binding prote     | 0 | 1.54  | 1.01  | 0.66  | 0.12  | 0.08  | 0.07  | 0.6 | 4.47 | 0.71  | 2.09  |
| A020071_01 | At1g22990 | copper chaperone (CCH)-rela       | 0 | -0.61 | -1.13 | -0.79 | -1.21 | -1.51 | -2.12 | 0.7 | 2.21 | 2.66  | 0.06  |
| A020076_01 | At3g13450 | branched chain alpha-keto ac      | 0 | 1.47  | 1.26  | 1.13  | 0.48  | 0.36  | 0.50  | 0.7 | 1.20 | 0.04  | 2.15  |
| A020083_01 | At3g63530 | putative protein; protein id: At  | 0 | -0.02 | 0.22  | 0.34  | 0.62  | 1.00  | 0.57  | 0.7 | 1.61 | -1.55 | -1.37 |

|            |           |                                  |   |       |       |       |       |       |       |     |      |       |       |
|------------|-----------|----------------------------------|---|-------|-------|-------|-------|-------|-------|-----|------|-------|-------|
| A020086_01 | At2g39460 | 60S ribosomal protein L23A;      | 0 | -0.71 | -0.87 | -0.85 | -1.31 | -1.59 | -1.50 | 1.3 | 0.06 | 2.75  | 0.16  |
| A020101_01 | At5g65670 | auxin-induced protein (IAA9)     | 0 | -0.77 | -0.82 | -0.57 | -0.69 | -0.84 | -1.01 | 0.9 | 0.41 | 2.51  | -0.93 |
| A020102_01 | At5g02840 | myb family transcription facto   | 0 | 1.07  | 0.69  | 0.77  | 0.88  | 1.07  | 1.09  | 0.9 | 0.41 | -1.68 | 0.45  |
| A020103_01 | At3g54600 | putative protein; protein id: At | 0 | 0.47  | 0.55  | 0.95  | 1.19  | 1.23  | 1.67  | 0.9 | 0.31 | -1.92 | -0.88 |
| A020105_01 | At5g04760 | l-box binding factor - like prot | 0 | 1.43  | 1.58  | 1.93  | 2.37  | 2.29  | 2.66  | 1.2 | 0.06 | -2.05 | -0.25 |
| A020109_01 | At1g50290 | expressed protein; protein id:   | 0 | 1.30  | 1.21  | 1.22  | 0.96  | 0.91  | 0.82  | 0.6 | 4.47 | -1.08 | 1.69  |
| A020116_01 | At5g12170 | putative protein; protein id: At | 0 | 0.83  | 1.27  | 1.31  | 1.71  | 1.66  | 1.55  | 1.4 | 0.06 | -2.02 | -0.17 |
| A020119_01 | At5g20490 | myosin-like protein; protein id  | 0 | 0.37  | 0.64  | 0.82  | 0.63  | 0.53  | 1.55  | 0.7 | 1.20 | -1.54 | -0.43 |
| A020121_01 | At4g31450 | putative protein; protein id: At | 0 | 0.60  | 0.92  | 1.21  | 1.37  | 1.64  | 1.67  | 1.4 | 0.06 | -2.02 | -0.67 |
| A020126_01 | At5g59960 | putative protein; protein id: At | 0 | 1.14  | 1.27  | 1.34  | 1.62  | 1.60  | 1.74  | 0.9 | 0.27 | -2.04 | 0.11  |
| A020144_01 | At1g68440 | expressed protein; protein id:   | 0 | 1.49  | 1.31  | 1.16  | 0.49  | 0.65  | 1.18  | 0.9 | 0.26 | -0.68 | 1.77  |
| A020145_01 | xxxx      | No hits found                    | 0 | 1.56  | 1.43  | 1.26  | 0.66  | 0.95  | 1.49  | 0.9 | 0.37 | -1.07 | 1.47  |
| A020157_01 | At5g27600 | long-chain-fatty-acid--CoA lig;  | 0 | 0.74  | 0.91  | 0.91  | 0.75  | 0.94  | 1.64  | 0.9 | 0.41 | -1.76 | -0.01 |
| A020160_01 | At1g33970 | expressed protein; protein id:   | 0 | 0.85  | 1.28  | 1.53  | 1.71  | 1.52  | 1.86  | 0.8 | 0.81 | -2.04 | -0.18 |
| A020171_01 | At3g02730 | thioredoxin f1; protein id: At3g | 0 | -0.05 | 0.48  | 0.47  | 1.01  | 1.11  | 0.44  | 0.6 | 4.47 | -1.40 | -1.03 |
| A020172_01 | At2g01450 | putative MAP kinase; protein     | 0 | 0.94  | 1.07  | 0.93  | 1.02  | 1.29  | 1.37  | 1.2 | 0.06 | -1.97 | 0.36  |
| A020178_01 | At1g69040 | unknown protein; protein id: A   | 0 | -0.84 | -1.04 | -0.61 | -0.77 | -0.54 | -0.59 | 0.7 | 1.61 | 1.76  | -2.11 |
| A020186_01 | At4g36220 | ferulate-5-hydroxylase (FAH1)    | 0 | -0.45 | -0.15 | 0.45  | 1.74  | 1.64  | 1.70  | 0.8 | 0.55 | -1.41 | -1.81 |
| A020187_01 | At3g62020 | germin-like protein (GLP10);     | 0 | -0.37 | 0.11  | 0.84  | 2.64  | 2.08  | 1.18  | 0.7 | 2.21 | -1.28 | -1.42 |
| A020189_01 | At3g16857 | ARR1 protein, putative; protei   | 0 | 1.23  | 1.16  | 1.27  | 1.32  | 1.32  | 1.55  | 1.1 | 0.06 | -1.93 | 0.52  |
| A020192_01 | At2g27150 | aldehyde oxidase; protein id:    | 0 | 1.57  | 1.82  | 1.85  | 2.01  | 2.26  | 2.72  | 1.3 | 0.06 | -2.03 | 0.04  |
| A020197_01 | At4g01310 | putative L5 ribosomal protein;   | 0 | -0.68 | -1.03 | -1.05 | -1.04 | -0.99 | -1.64 | 0.7 | 2.21 | 2.65  | -0.40 |
| A020200_01 | At2g01320 | ABC transporter family protei    | 0 | 0.40  | 0.45  | 0.71  | 0.88  | 1.09  | 0.85  | 0.9 | 0.27 | -1.92 | -0.71 |
| A020213_01 | At1g79990 | putative coatomer protein cor    | 0 | -0.18 | -0.16 | -0.46 | -0.87 | -0.87 | -1.18 | 0.8 | 0.96 | 2.43  | 0.96  |
| A020214_01 | At3g47960 | putative peptide transporter; p  | 0 | 1.07  | 1.78  | 1.48  | 0.97  | 0.47  | 1.07  | 1.2 | 0.06 | -0.72 | 1.54  |
| A020216_01 | At1g09630 | GTP-binding protein, putative    | 0 | -1.19 | -1.12 | -1.05 | -1.00 | -1.06 | NA    | 0.6 | 4.47 | NA    | NA    |
| A020217_01 | At2g28790 | putative thaumatin; protein id:  | 0 | -1.99 | -3.05 | -1.95 | -3.24 | -3.07 | -2.52 | 1.3 | 0.06 | 2.57  | -0.91 |
| A020221_01 | At3g10740 | glycosyl hydrolase family 51;    | 0 | 2.17  | 2.12  | 2.21  | 2.44  | 2.12  | 2.17  | 1.2 | 0.06 | -1.78 | 0.86  |
| A020225_01 | At3g62550 | putative protein; protein id: At | 0 | 1.55  | 1.78  | 2.58  | 3.06  | 3.01  | 2.48  | 1.1 | 0.10 | -1.96 | -0.31 |
| A020226_01 | At3g01400 | expressed protein; protein id:   | 0 | 0.39  | 0.40  | 0.64  | 0.78  | 0.93  | 1.01  | 0.8 | 0.55 | -1.97 | -0.79 |
| A020241_01 | At5g61530 | auxin-regulated protein; prote   | 0 | 0.52  | 0.42  | 0.73  | 0.89  | 1.05  | 1.10  | 1.2 | 0.06 | -1.94 | -0.71 |
| A020243_01 | At1g07230 | unknown protein; protein id: A   | 0 | 0.36  | 0.65  | 0.84  | 1.02  | 1.02  | 0.99  | 1.1 | 0.06 | -2.00 | -0.59 |
| A020258_01 | At5g22630 | chorismate mutase/prephena       | 0 | -0.40 | -0.27 | 0.54  | 1.87  | 1.75  | 0.97  | 1.0 | 0.18 | -1.22 | -1.69 |
| A020260_01 | At3g01700 | arabinogalactan-protein (AGF     | 0 | 0.20  | 0.60  | 0.89  | 0.81  | 1.14  | 1.28  | 1.1 | 0.14 | -1.90 | -0.97 |
| A020264_01 | At5g09900 | putative 26S proteasome p55      | 0 | -0.95 | -1.10 | -1.02 | -1.01 | -0.64 | -0.92 | 0.8 | 0.81 | 2.15  | -1.75 |
| A020265_01 | At4g13950 | expressed protein; protein id:   | 0 | -1.02 | -1.38 | -1.16 | -1.00 | -1.09 | -1.59 | 0.7 | 1.61 | 2.52  | -1.11 |
| A020286_01 | At3g23560 | expressed protein; protein id:   | 0 | 0.01  | -0.49 | -0.76 | -1.71 | -1.29 | -0.49 | 1.0 | 0.16 | 1.95  | 0.41  |
| A020289_01 | At1g21680 | expressed protein; protein id:   | 0 | 1.40  | 1.71  | 2.01  | 2.15  | 2.44  | 1.74  | 1.0 | 0.16 | -1.89 | 0.16  |
| A020290_01 | At4g17940 | putative protein; protein id: At | 0 | 0.89  | 0.83  | 1.23  | 1.30  | 1.12  | 1.25  | 0.6 | 4.47 | -1.97 | 0.15  |
| A020300_01 | At1g22780 | putative 40S ribosomal protei    | 0 | -0.46 | -1.17 | -1.15 | -1.69 | -1.95 | -2.04 | 1.0 | 0.18 | 2.72  | 0.44  |
| A020303_01 | At5g19510 | elongation factor 1B alpha-su    | 0 | -0.30 | -0.68 | -0.83 | -1.31 | -1.58 | -1.58 | 0.6 | 4.47 | 2.63  | 0.70  |
| A020306_01 | At1g74410 | putative RING zinc finger prot   | 0 | 0.27  | 0.51  | 0.85  | 1.06  | 1.28  | 1.30  | 0.8 | 0.55 | -1.90 | -1.09 |
| A020314_01 | At2g28190 | copper/zinc superoxide dismut    | 0 | -1.40 | -2.52 | -3.36 | -4.13 | -3.74 | -3.66 | 0.9 | 0.31 | 2.71  | 0.07  |
| A020317_01 | At4g27410 | putative protein; protein id: At | 0 | 2.20  | 2.16  | 2.29  | 2.53  | 2.72  | 3.55  | 1.3 | 0.06 | -1.97 | 0.10  |

|            |           |                                   |   |       |       |       |       |       |       |     |      |       |       |
|------------|-----------|-----------------------------------|---|-------|-------|-------|-------|-------|-------|-----|------|-------|-------|
| A020340_01 | At3g43980 | ribosomal S29 -like protein; p    | 0 | -0.77 | -1.03 | -0.97 | -1.43 | -1.64 | -1.61 | 1.5 | 0.06 | 2.80  | 0.01  |
| A020342_01 | At2g05630 | AtAPG8d; putative microtubul      | 0 | 0.61  | 0.87  | 1.01  | 1.16  | 1.13  | 1.23  | 0.9 | 0.41 | -2.06 | -0.25 |
| A020343_01 | At3g21870 | PREG-like protein, putative; p    | 0 | 1.43  | 0.94  | 0.68  | 0.44  | 0.37  | 0.22  | 1.0 | 0.16 | 0.26  | 2.10  |
| A020344_01 | At2g29420 | glutathione transferase, putat    | 0 | 1.27  | 1.57  | 1.52  | 1.18  | 1.09  | 1.78  | 0.9 | 0.26 | -1.61 | 0.94  |
| A020345_01 | At2g45530 | expressed protein; protein id:    | 0 | 0.23  | 0.62  | 0.96  | 1.17  | 1.40  | 1.18  | 1.0 | 0.18 | -1.88 | -1.04 |
| A020349_01 | At3g26060 | putative peroxiredoxin; protei    | 0 | -0.54 | -1.10 | -1.36 | -1.42 | -1.27 | -2.23 | 0.8 | 0.81 | 2.61  | 0.11  |
| A020350_01 | At3g15500 | putative jasmonic acid regula     | 0 | 2.75  | 2.56  | 2.56  | 2.12  | 2.16  | 3.79  | 1.1 | 0.10 | -1.62 | 0.71  |
| A020352_01 | At4g39090 | cysteine proteinase RD19A; p      | 0 | 1.68  | 1.69  | 1.91  | 2.15  | 2.37  | 2.40  | 1.0 | 0.16 | -2.01 | 0.08  |
| A020381_01 | At5g28060 | 40S ribosomal protein S19 - li    | 0 | -0.82 | -1.21 | -1.21 | -1.76 | -2.02 | -2.10 | 1.0 | 0.16 | 2.78  | 0.20  |
| A020382_01 | At1g71220 | putative UDP-glucose:glycopr      | 0 | -1.14 | -0.98 | -0.91 | -1.12 | -1.03 | -0.97 | 0.8 | 0.96 | 2.40  | -1.39 |
| A020383_01 | At2g45030 | mitochondrial elongation fact     | 0 | -1.02 | -1.09 | -0.94 | -1.05 | -0.78 | -0.88 | 0.6 | 4.47 | 2.23  | -1.71 |
| A020385_01 | At2g21160 | putative signal sequence rece     | 0 | -0.70 | -0.73 | -0.85 | -0.97 | -1.09 | -1.22 | 0.7 | 0.96 | 2.80  | -0.25 |
| A020390_01 | At2g22500 | mitochondrial carrier protein f   | 0 | -0.73 | -0.34 | -0.54 | -1.35 | -1.76 | -0.95 | 0.8 | 0.96 | 2.19  | 0.44  |
| A020400_01 | At3g15630 | expressed protein; protein id:    | 0 | 1.97  | 1.43  | 1.26  | 0.85  | 0.50  | 0.45  | 0.8 | 0.66 | 0.04  | 2.17  |
| A020406_01 | At2g04390 | 40S ribosomal protein S17; p      | 0 | -1.00 | -1.26 | -1.15 | -1.60 | -1.76 | -1.69 | 1.4 | 0.06 | 2.81  | -0.31 |
| A020410_01 | At2g28470 | glycosyl hydrolase family 35 (    | 0 | -1.85 | -2.35 | -2.16 | -2.18 | -2.81 | -2.59 | 1.3 | 0.06 | 2.70  | -0.80 |
| A020419_01 | At2g16740 | E2, ubiquitin-conjugating enzy    | 0 | 0.69  | 1.67  | 1.86  | 1.96  | 1.99  | 2.53  | 1.5 | 0.06 | -1.98 | -0.45 |
| A020420_01 | At1g55450 | expressed protein; protein id:    | 0 | 0.85  | 1.54  | 1.74  | 2.38  | 2.50  | 2.19  | 0.6 | 2.21 | -1.99 | -0.57 |
| A020421_01 | At1g78240 | unknown protein; protein id: A    | 0 | 0.75  | 0.88  | 0.90  | 0.89  | 0.55  | 0.59  | 0.7 | 2.21 | -1.13 | 1.30  |
| A020427_01 | At1g56610 | unknown protein; protein id: A    | 0 | 0.34  | 0.32  | 0.76  | 1.05  | 1.27  | 1.20  | 0.8 | 0.66 | -1.81 | -1.17 |
| A020428_01 | At1g17840 | ABC transporter family protei     | 0 | -0.31 | -0.08 | -0.20 | -0.81 | -1.23 | -0.97 | 0.8 | 0.81 | 2.06  | 0.93  |
| A020436_01 | At2g36930 | expressed protein; protein id:    | 0 | 0.57  | -0.52 | -0.44 | -0.90 | -1.14 | -0.93 | 0.6 | 4.47 | 2.17  | 1.13  |
| A020438_01 | At4g37200 | thiol-disulfide interchange like  | 0 | 0.50  | 0.86  | 0.93  | 0.93  | 1.21  | 1.14  | 0.9 | 0.31 | -2.01 | -0.27 |
| A020440_01 | At5g46430 | ribosomal protein L32; proteir    | 0 | -0.46 | -0.76 | -0.69 | -1.09 | -1.47 | -1.16 | 0.7 | 0.96 | 2.69  | 0.29  |
| A020452_01 | At3g13520 | arabinogalactan-protein (AGF      | 0 | -0.23 | -0.53 | -1.08 | -1.93 | -2.10 | -2.01 | 1.5 | 0.06 | 2.50  | 0.95  |
| A020460_01 | At4g16670 | hypothetical protein; protein ic  | 0 | 1.82  | 1.91  | 1.83  | 1.37  | 1.60  | 1.31  | 0.9 | 0.41 | -1.26 | 1.53  |
| A020470_01 | At5g63890 | histidinol dehydrogenase; pro     | 0 | -0.91 | -0.87 | -0.96 | -1.02 | -0.81 | -1.13 | 0.8 | 0.66 | 2.59  | -1.07 |
| A020481_01 | At3g18940 | expressed protein; protein id:    | 0 | -0.90 | -1.01 | -0.95 | -1.02 | -1.02 | -1.18 | 0.8 | 0.55 | 2.68  | -1.03 |
| A020482_01 | At2g23810 | hypothetical protein; protein ic  | 0 | 1.19  | 1.38  | 1.12  | 0.82  | 0.86  | 1.11  | 1.0 | 0.26 | -1.18 | 1.54  |
| A020490_01 | At4g27760 | forever young gene (FEY); pr      | 0 | -0.31 | -0.67 | -0.73 | -0.92 | -0.74 | -1.09 | 0.7 | 2.21 | 2.66  | -0.03 |
| A020497_01 | At2g47910 | expressed protein; protein id:    | 0 | 0.53  | 0.93  | 1.01  | 1.16  | 1.29  | 1.20  | 1.0 | 0.16 | -2.03 | -0.34 |
| A020501_01 | At5g61440 | thioredoxin-like 3; protein id: / | 0 | 0.64  | -0.02 | -0.36 | -2.22 | -2.68 | -2.12 | 1.6 | 0.06 | 2.17  | 1.39  |
| A020504_01 | At3g21760 | putative UDP-glucose glucosyl     | 0 | 0.86  | 0.79  | 0.93  | 0.82  | 0.66  | 1.20  | 0.7 | 0.96 | -1.68 | 0.70  |
| A020509_01 | At3g19010 | expressed protein; protein id:    | 0 | 0.99  | 1.12  | 1.11  | 1.38  | 1.36  | 1.87  | 1.1 | 0.10 | -2.01 | -0.06 |
| A020515_01 | At5g58350 | MAP kinase; protein id: At5g5     | 0 | 1.86  | 1.89  | 1.72  | 1.44  | 1.83  | 2.25  | 1.1 | 0.14 | -1.73 | 0.87  |
| A020516_01 | At5g20720 | chloroplast Cpn21 protein; pr     | 0 | -1.19 | -1.47 | -1.32 | -1.43 | -1.43 | -1.95 | 0.6 | 4.47 | 2.71  | -0.77 |
| A020524_01 | At3g02040 | expressed protein; protein id:    | 0 | -1.64 | -1.60 | -1.04 | -2.48 | -1.49 | -0.89 | 0.7 | 1.61 | 1.91  | -1.28 |
| A020529_01 | At3g11410 | hypothetical protein; protein ic  | 0 | 0.95  | 1.10  | 1.58  | 1.68  | 1.59  | 2.02  | 1.2 | 0.06 | -2.03 | -0.29 |
| A020530_01 | At1g29240 | unknown protein; protein id: A    | 0 | 1.25  | 1.75  | 1.98  | 1.97  | 1.57  | 1.92  | 1.1 | 0.14 | -1.87 | 0.47  |
| A020537_01 | At1g71260 | unknown protein; protein id: A    | 0 | -0.67 | -1.06 | -0.85 | -1.23 | -0.71 | -1.45 | 0.6 | 4.47 | 2.49  | -0.50 |
| A020541_01 | At2g42490 | putative copper amine oxidas      | 0 | 0.80  | 0.89  | 0.67  | 0.61  | 0.45  | 1.36  | 0.8 | 0.81 | -1.32 | 0.62  |
| A020546_01 | At2g17220 | putative protein kinase; protei   | 0 | 0.84  | 1.04  | 0.88  | 0.68  | 0.80  | 1.18  | 0.8 | 0.55 | -1.64 | 0.88  |
| A020550_01 | At3g07110 | putative 60S ribosomal protei     | 0 | -0.66 | -1.01 | -0.91 | -1.49 | -1.81 | -1.96 | 1.0 | 0.16 | 2.72  | 0.36  |
| A020551_01 | At4g03260 | putative protein phosphatase      | 0 | 0.42  | 0.69  | 0.70  | 0.56  | 0.85  | 1.23  | 1.0 | 0.26 | -1.85 | -0.29 |

|            |               |                                  |   |       |       |       |       |       |       |     |      |       |       |
|------------|---------------|----------------------------------|---|-------|-------|-------|-------|-------|-------|-----|------|-------|-------|
| A020556_01 | At3g22840     | early light-induced protein; pr  | 0 | -1.51 | -1.94 | -1.52 | -1.75 | -2.00 | -1.32 | 1.0 | 0.14 | 2.25  | -1.34 |
| A020557_01 | At5g23740     | 40S ribosomal protein S11; pi    | 0 | -0.62 | -1.06 | -0.67 | -1.23 | -1.23 | -1.38 | 0.8 | 0.96 | 2.80  | -0.22 |
| A020559_01 | At3g60530     | GATA zinc finger protein; proi   | 0 | -0.36 | -1.47 | -1.63 | -2.05 | -2.53 | -2.52 | 1.3 | 0.06 | 2.65  | 0.46  |
| A020560_01 | At3g47340     | glutamine-dependent asparaç      | 0 | 3.09  | 2.57  | 1.36  | -0.73 | -0.58 | -0.56 | 0.7 | 1.20 | 1.06  | 2.11  |
| A020564_01 | At1g27290     | expressed protein; protein id:   | 0 | 1.21  | 1.18  | 1.17  | 1.10  | 0.87  | 1.04  | 0.9 | 0.48 | -1.44 | 1.41  |
| A020565_01 | At3g10980     | unknown protein; protein id: A   | 0 | 1.04  | 0.77  | 0.78  | 0.55  | 0.01  | 0.46  | 0.8 | 0.81 | -0.04 | 1.99  |
| A020580_01 | At4g34230     | cinnamyl alcohol dehydrogen:     | 0 | 2.16  | 2.15  | 2.01  | 2.03  | 1.68  | 1.87  | 0.8 | 0.55 | -1.48 | 1.35  |
| A020588_01 | At3g60690     | putative protein; protein id: At | 0 | 1.95  | 2.49  | 2.70  | 2.88  | 2.90  | 3.05  | 2.0 | 0.06 | -2.03 | 0.22  |
| A020589_01 | At5g65210     | bZIP transcription factor, TGA   | 0 | 2.08  | 2.41  | 2.76  | 2.84  | 3.03  | 3.55  | 1.8 | 0.06 | -2.05 | 0.05  |
| A020590_01 | At5g48380     | receptor-like protein kinase; ç  | 0 | 0.86  | 1.56  | 1.33  | 0.94  | 0.69  | 0.95  | 0.8 | 0.48 | -1.00 | 1.33  |
| A020592_01 | At5g48480     | expressed protein; protein id:   | 0 | -0.19 | -0.62 | -0.54 | -1.25 | -1.15 | -1.03 | 0.6 | 4.47 | 2.59  | 0.56  |
| A020594_01 | At4g23690     | disease resistance response      | 0 | -1.51 | -0.70 | -0.60 | -0.35 | -1.76 | -2.21 | 0.7 | 1.61 | 1.78  | -0.21 |
| A020599_01 | At1g79500     | 2-dehydro-3-deoxyphosphoc        | 0 | -1.01 | -1.77 | -1.57 | -1.44 | -1.72 | -2.34 | 1.2 | 0.06 | 2.65  | -0.53 |
| A020602_01 | At2g39940     | coronatine-insensitive 1 (COI    | 0 | 0.65  | 0.86  | 1.10  | 1.10  | 1.01  | 1.26  | 1.0 | 0.18 | -2.02 | -0.02 |
| A020603_01 | At5g06530     | ABC transporter family protei    | 0 | 1.14  | 1.80  | 2.06  | 2.05  | 2.13  | 2.59  | 0.8 | 0.81 | -2.03 | -0.12 |
| A020605_01 | At2g25450     | putative dioxygenase; protein    | 0 | 2.79  | 3.45  | 3.27  | 3.59  | 3.88  | 4.41  | 1.5 | 0.06 | -2.02 | 0.28  |
| A020606_01 | At5g52920     | pyruvate kinase; protein id: At  | 0 | -0.09 | -0.08 | -0.28 | -0.90 | -1.21 | -1.20 | 0.8 | 0.66 | 2.27  | 1.16  |
| A020611_01 | At1g07990     | unknown protein; protein id: A   | 0 | 0.33  | 0.60  | 0.63  | 0.58  | 0.74  | 1.01  | 1.0 | 0.20 | -1.95 | -0.36 |
| A020613_01 | At4g13550     | putative protein; protein id: At | 0 | 0.64  | 1.25  | 1.62  | 1.78  | 2.04  | 2.17  | 1.7 | 0.06 | -2.01 | -0.67 |
| A020617_01 | At1g54100     | aldehyde dehydrogenase hon       | 0 | 2.07  | 1.95  | 1.56  | 1.55  | 1.84  | 1.94  | 1.1 | 0.14 | -1.56 | 1.13  |
| A020627_01 | At3g17780     | unknown protein; protein id: A   | 0 | -0.91 | -0.81 | -0.83 | -0.68 | -0.60 | -1.04 | 0.6 | 4.47 | 2.24  | -1.51 |
| A020633_01 | At4g36040     | DnaJ-like protein; protein id: A | 0 | 1.51  | 1.48  | 1.55  | 1.26  | 1.24  | 2.15  | 0.8 | 0.55 | -1.68 | 0.70  |
| A020645_01 | At2g01490     | expressed protein; protein id:   | 0 | 1.35  | 1.39  | 1.34  | 1.38  | 1.11  | 1.25  | 0.8 | 0.48 | -1.59 | 1.21  |
| A020654_01 | At1g49050     | expressed protein; protein id:   | 0 | 1.08  | 1.34  | 1.20  | 1.23  | 1.42  | 1.40  | 0.9 | 0.31 | -1.92 | 0.58  |
| A020656_01 | At3g29810     | phytochelatin synthetase-like    | 0 | 1.20  | 1.17  | 0.56  | -0.10 | -0.03 | 0.43  | 1.0 | 0.26 | 0.47  | 2.06  |
| A020659_01 | At3g03630     | O-acetylserine (thiol) lyase; pi | 0 | -1.06 | -1.40 | -1.32 | -1.07 | -1.56 | -2.11 | 0.7 | 1.61 | 2.62  | -0.53 |
| A020671_01 | At4g27580     | expressed protein; protein id:   | 0 | 0.00  | 0.42  | 0.88  | 0.97  | 0.99  | 1.39  | 1.2 | 0.06 | -1.76 | -1.26 |
| A020686_01 | At2g36630     | unknown protein; protein id: A   | 0 | 1.60  | 1.61  | 1.42  | 0.85  | 0.95  | 1.08  | 1.0 | 0.18 | -0.84 | 1.87  |
| A020689_01 | At3g44750     | putative histone deacetylase;    | 0 | -1.60 | -1.96 | -1.56 | -2.73 | -2.84 | -2.92 | 1.6 | 0.06 | 2.77  | -0.12 |
| A020697_01 | At1g78630     | ribosomal protein L13, putativ   | 0 | -0.45 | -0.97 | -0.97 | -0.97 | -1.03 | -1.60 | 0.7 | 0.96 | 2.67  | -0.04 |
| A020704_01 | At1g02205     | hypothetical protein; protein ic | 0 | -0.59 | -0.29 | -0.71 | -0.83 | -1.57 | -1.55 | 0.7 | 2.21 | 2.39  | 0.64  |
| A020708_01 | At1g74910     | putative GDP-mannose pyrop       | 0 | 0.60  | 0.70  | 0.69  | 1.07  | 1.25  | 0.83  | 1.1 | 0.14 | -1.87 | -0.24 |
| A020710_01 | At1g71030     | myb family transcription facto   | 0 | 1.45  | 1.58  | 1.77  | 2.32  | 2.16  | 2.09  | 1.9 | 0.06 | -2.01 | 0.05  |
| A020727_01 | At1g12000     | putative pyrophosphate-fructc    | 0 | -1.46 | -1.47 | -1.36 | -1.43 | -1.94 | -2.04 | 1.0 | 0.14 | 2.67  | -0.65 |
| A020730_01 | At3g18000     | methyltransferase, putative; p   | 0 | -2.58 | -2.93 | -2.60 | -2.88 | -3.10 | -3.36 | 1.1 | 0.14 | 2.69  | -1.00 |
| A020731_01 | At2g40000     | putative nematode-resistance     | 0 | 3.31  | 3.20  | 3.11  | 2.56  | 2.15  | 3.04  | 0.8 | 0.81 | -1.36 | 1.47  |
| A020732_01 | At4g17190     | farnesyl pyrophosphate synth     | 0 | -1.32 | -1.50 | -1.41 | -1.48 | -1.97 | -2.29 | 1.0 | 0.16 | 2.74  | -0.46 |
| A020733_01 | At5g47770     | farnesyl pyrophosphate synth     | 0 | -0.93 | -1.19 | -1.36 | -1.66 | -1.81 | -2.09 | 1.0 | 0.16 | 2.81  | -0.03 |
| A020734_01 | At1g17020     | SRG1-like protein; protein id:   | 0 | 0.93  | 0.63  | 0.27  | -0.42 | 0.36  | 1.67  | 0.9 | 0.31 | -0.24 | 0.11  |
| A020735_01 | At4g02500     | putative glycosyltransferase; j  | 0 | -0.63 | -0.73 | -0.98 | -1.17 | -1.75 | -1.96 | 0.8 | 0.55 | 2.64  | 0.47  |
| A020741_01 | At4g26080     | protein phosphatase ABI1; pr     | 0 | 1.19  | 1.10  | 1.21  | 1.27  | 1.20  | 1.55  | 0.8 | 0.96 | -1.91 | 0.49  |
| A020748_01 | At2g05540     | putative glycine-rich protein; ç | 0 | 3.75  | 3.90  | 3.35  | 2.86  | 2.43  | 2.97  | 1.2 | 0.06 | -1.20 | 1.66  |
| A020751_01 | not annotated | Chr1 W/25637330-25637399         | 0 | 1.27  | 0.97  | 1.31  | 1.32  | 1.39  | 1.48  | 0.6 | 2.21 | -1.89 | 0.37  |
| A020754_01 | At3g02110     | putative serine carboxypeptid    | 0 | -0.20 | -0.36 | -0.59 | -0.70 | -1.28 | -1.14 | 1.2 | 0.06 | 2.51  | 0.77  |

|            |           |                                   |   |       |       |       |       |       |       |     |      |       |       |
|------------|-----------|-----------------------------------|---|-------|-------|-------|-------|-------|-------|-----|------|-------|-------|
| A020756_01 | At3g03270 | expressed protein; protein id:    | 0 | 0.97  | 1.15  | 1.05  | 1.13  | 1.44  | 1.59  | 1.6 | 0.06 | -2.00 | 0.12  |
| A020760_01 | At4g32940 | gamma-VPE (vacuolar proce:        | 0 | 0.35  | 0.97  | 1.86  | 2.18  | 2.55  | 3.07  | 1.4 | 0.06 | -1.83 | -1.24 |
| A020761_01 | At3g30390 | expressed protein; protein id:    | 0 | 0.87  | 1.14  | 1.25  | 1.28  | 1.04  | 1.60  | 0.9 | 0.31 | -1.92 | 0.27  |
| A020765_01 | At2g22690 | expressed protein; protein id:    | 0 | 0.61  | 0.57  | 0.73  | 0.88  | 0.99  | 1.10  | 0.9 | 0.41 | -2.02 | -0.33 |
| A020771_01 | At5g53350 | ATP-dependent Clp protease        | 0 | 0.80  | 0.87  | 0.95  | 1.02  | 0.98  | 1.41  | 0.9 | 0.37 | -1.98 | 0.10  |
| A020777_01 | At2g44500 | similar to axi 1 protein from N   | 0 | 2.27  | 2.33  | 1.68  | 0.76  | 0.92  | 1.08  | 1.4 | 0.06 | -0.27 | 2.08  |
| A020784_01 | At5g57050 | protein phosphatase 2C, ABI       | 0 | 0.93  | 1.18  | 1.59  | 1.59  | 1.52  | 1.94  | 0.9 | 0.27 | -2.05 | -0.21 |
| A020788_01 | At3g23050 | indoleacetic acid (IAA)-inducil   | 0 | 0.30  | -0.18 | -0.38 | -1.88 | NA    | NA    | 1.0 | 0.16 | NA    | NA    |
| A020795_01 | At1g72150 | cytosolic factor, putative; prot  | 0 | 1.32  | 1.65  | 1.82  | 1.77  | 1.51  | 1.79  | 1.0 | 0.18 | -1.85 | 0.64  |
| A020797_01 | At5g52470 | fibrillarin 1 AtFib1/SKIP7; prot  | 0 | -0.46 | -0.79 | -0.65 | -1.28 | -1.21 | -1.27 | 0.9 | 0.27 | 2.70  | 0.28  |
| A020803_01 | At4g37520 | peroxidase, putative; protein i   | 0 | 2.11  | 2.59  | 2.67  | 2.50  | 2.59  | 2.39  | 1.6 | 0.06 | -1.77 | 0.80  |
| A020806_01 | At2g30860 | glutathione transferase, putat    | 0 | -0.12 | 0.46  | 0.78  | 0.81  | 1.09  | 1.41  | 0.8 | 0.81 | -1.67 | -1.24 |
| A020816_01 | At2g22300 | ethylene-induced calmodulin-      | 0 | 0.87  | 1.12  | 1.19  | 1.22  | 0.93  | 1.46  | 0.8 | 0.66 | -1.86 | 0.45  |
| A020819_01 | At3g48000 | aldehyde dehydrogenase (NA        | 0 | 0.63  | 0.92  | 1.17  | 1.48  | 1.71  | 1.64  | 1.7 | 0.06 | -2.01 | -0.63 |
| A020828_01 | At3g19580 | zinc finger protein, putative; p  | 0 | 1.75  | 1.93  | 2.16  | 2.02  | 1.83  | 2.73  | 1.1 | 0.14 | -1.90 | 0.45  |
| A020836_01 | At1g05010 | 1-aminocyclopropane-1-carbc       | 0 | 1.78  | 1.84  | 1.51  | 1.34  | 1.35  | 2.22  | 1.0 | 0.16 | -1.56 | 1.01  |
| A020842_01 | At1g04270 | putative 40S ribosomal protei     | 0 | -0.76 | -0.95 | -0.92 | -1.38 | -1.56 | -1.50 | 1.2 | 0.06 | 2.80  | 0.00  |
| A020843_01 | At4g30930 | WRKY family transcription fac     | 0 | -0.99 | -1.22 | -1.12 | -1.53 | -1.58 | -1.78 | 1.9 | 0.06 | 2.82  | -0.31 |
| A020847_01 | At1g10070 | tat-binding protein, putative; p  | 0 | 3.25  | 2.72  | 2.51  | 2.57  | 2.57  | 1.80  | 1.2 | 0.06 | -1.15 | 1.47  |
| A020852_01 | At1g15930 | 40S ribosomal protein S12, pi     | 0 | 0.07  | -0.38 | -0.45 | -1.00 | -1.28 | -1.07 | 0.6 | 4.47 | 2.44  | 1.04  |
| A020855_01 | At3g27925 | DegP protease; protein id: At     | 0 | 0.40  | 0.83  | 1.08  | 1.66  | 1.81  | 1.84  | 1.1 | 0.10 | -1.93 | -1.02 |
| A020866_01 | At5g65630 | putative protein; protein id: At  | 0 | -0.21 | 0.00  | -0.29 | -1.24 | -0.75 | -0.85 | 0.8 | 0.55 | 2.05  | 0.90  |
| A020868_01 | At3g10020 | expressed protein; protein id:    | 0 | 1.51  | 1.06  | 0.91  | 0.90  | 0.48  | 0.13  | 0.8 | 0.55 | 0.06  | 2.01  |
| A020869_01 | At5g54080 | homogentisate 1,2-dioxygena       | 0 | 2.03  | 1.89  | 1.90  | 1.91  | 2.19  | 2.16  | 0.9 | 0.37 | -1.82 | 0.71  |
| A020873_01 | At3g21670 | nitrate transporter; protein id:  | 0 | 1.22  | 1.26  | 1.22  | 0.85  | 0.82  | 1.19  | 0.8 | 0.48 | -1.26 | 1.45  |
| A020880_01 | At4g34050 | caffeoyl-CoA 3-O-methyltrans      | 0 | -0.25 | 0.38  | 1.06  | 2.40  | 2.06  | 1.58  | 0.9 | 0.31 | -1.50 | -1.39 |
| A020883_01 | At2g39930 | putative isoamylase; protein i    | 0 | -0.70 | -0.94 | -1.02 | -0.83 | -0.70 | -1.48 | 1.2 | 0.06 | 2.45  | -0.71 |
| A020905_01 | At5g08260 | serine-type carboxypeptidase      | 0 | -2.00 | -2.46 | -1.68 | -1.69 | -1.96 | -2.00 | 1.4 | 0.06 | 2.28  | -1.67 |
| A020910_01 | At5g13710 | 24-sterol C-methyltransferase     | 0 | -0.33 | -0.67 | -1.00 | -1.53 | -1.57 | -1.66 | 1.2 | 0.06 | 2.66  | 0.63  |
| A020917_01 | At1g75380 | wound-responsive protein, pu      | 0 | 1.13  | 1.62  | 1.99  | 2.75  | 2.69  | 2.71  | 1.6 | 0.06 | -2.02 | -0.59 |
| A020919_01 | At3g25860 | dihydrolipoamide S-acetyltran     | 0 | -0.87 | -1.18 | -1.29 | -1.53 | -2.06 | -2.39 | 1.1 | 0.10 | 2.74  | 0.19  |
| A020929_01 | At1g01490 | expressed protein; protein id:    | 0 | 1.21  | 1.48  | 1.45  | 1.64  | 1.82  | 2.29  | 1.6 | 0.06 | -2.02 | -0.06 |
| A020930_01 | At1g48750 | lipid transfer protein, putative; | 0 | -0.58 | -1.32 | -1.44 | -2.75 | -3.15 | -2.97 | 1.9 | 0.06 | 2.65  | 0.66  |
| A020944_01 | At2g46420 | expressed protein; protein id:    | 0 | -0.57 | -0.66 | -0.56 | -1.07 | -0.85 | -0.80 | 0.8 | 0.81 | 2.62  | -0.35 |
| A020955_01 | At2g16700 | actin depolymerizing factor 5;    | 0 | 1.40  | 1.91  | 1.82  | 1.80  | 1.74  | 1.56  | 1.1 | 0.14 | -1.72 | 0.84  |
| A020958_01 | At1g53580 | glyoxalase II, putative (hydrox   | 0 | 1.81  | 1.88  | 1.76  | 1.73  | 1.79  | 1.99  | 1.1 | 0.14 | -1.79 | 0.93  |
| A020960_01 | At5g07470 | peptide methionine sulfoxide      | 0 | 0.60  | 0.76  | 0.85  | 1.09  | 1.26  | 1.49  | 0.9 | 0.26 | -1.99 | -0.59 |
| A020964_01 | At1g08940 | unknown protein; protein id: A    | 0 | -0.31 | 0.32  | 0.28  | 0.69  | 1.05  | 0.79  | 0.8 | 0.81 | -1.47 | -1.63 |
| A020970_01 | At4g29680 | nucleotide pyrophosphatase -      | 0 | -1.11 | -1.09 | -0.94 | -1.08 | -1.46 | -1.43 | 1.1 | 0.10 | 2.66  | -0.74 |
| A020971_01 | At5g42180 | peroxidase, putative; protein i   | 0 | 1.02  | 2.96  | 3.23  | 3.98  | 2.75  | 1.60  | 0.8 | 0.48 | -1.25 | 0.18  |
| A020974_01 | At5g43270 | squamosa promoter binding p       | 0 | -0.58 | -0.84 | -0.94 | -1.63 | -1.67 | -1.46 | 1.0 | 0.16 | 2.70  | 0.32  |
| A020978_01 | At3g20210 | vacuolar processing enzyme/       | 0 | -1.45 | -2.40 | -1.50 | -2.37 | -2.80 | -3.04 | 1.1 | 0.14 | 2.71  | -0.24 |
| A020980_01 | At5g40370 | glutaredoxin -like protein; proi  | 0 | 0.22  | 0.74  | 1.01  | 1.41  | 1.44  | 1.91  | 1.3 | 0.06 | -1.87 | -1.09 |
| A020981_01 | At5g20160 | ribosomal protein L7Ae-like; p    | 0 | -0.67 | -0.65 | -0.44 | -0.92 | -0.92 | -1.05 | 0.8 | 0.81 | 2.56  | -0.21 |

|            |              |                                  |   |       |       |       |       |       |       |     |      |       |       |
|------------|--------------|----------------------------------|---|-------|-------|-------|-------|-------|-------|-----|------|-------|-------|
| A020992_01 | At4g15545    | expressed protein; protein id:   | 0 | 0.92  | 1.03  | 1.02  | 1.04  | 1.24  | 1.45  | 0.9 | 0.48 | -1.99 | 0.26  |
| A020998_01 | At2g47610    | 60S ribosomal protein L7A; p     | 0 | -0.76 | -1.04 | -0.93 | -1.56 | -1.83 | -1.51 | 1.1 | 0.10 | 2.75  | 0.07  |
| A020999_01 | At1g58380    | ribosomal protein S2, putative   | 0 | -0.61 | -0.88 | -0.85 | -1.39 | -1.42 | -1.39 | 1.0 | 0.18 | 2.77  | 0.15  |
| A021010_01 | At1g09590    | putative 60S ribosomal protei    | 0 | -1.25 | -1.41 | -1.26 | -2.06 | -2.09 | -1.95 | 1.6 | 0.06 | 2.74  | -0.23 |
| A021021_01 | At5g28540    | luminal binding protein; protei  | 0 | -1.30 | -0.97 | -1.18 | -1.85 | -2.16 | -1.65 | 0.9 | 0.27 | 2.55  | -0.07 |
| A021026_01 | At5g65730    | xyloglucan endo-transglycosy     | 0 | 0.74  | 0.68  | 0.13  | -0.56 | -1.24 | -1.95 | 1.6 | 0.06 | 1.75  | 1.61  |
| A021035_01 | At5g63190    | topoisomerase, putative; prot    | 0 | 1.36  | 1.22  | 1.22  | 1.32  | 1.34  | 1.30  | 1.0 | 0.16 | -1.75 | 0.86  |
| A021037_01 | At4g12420    | pectinesterase (pectin methyl    | 0 | -0.66 | -0.81 | -1.29 | -1.83 | -1.82 | -2.23 | 0.6 | 2.21 | 2.68  | 0.54  |
| A021040_01 | At4g21960    | peroxidase, putative; protein i  | 0 | -0.14 | -0.16 | -0.33 | -0.39 | -0.93 | -1.30 | 0.9 | 0.31 | 2.10  | 0.94  |
| A021042_01 | At4g17090    | glycosyl hydrolase family 14 (   | 0 | 0.91  | 1.61  | 1.45  | 0.98  | 0.73  | 0.94  | 0.6 | 4.47 | -0.94 | 1.35  |
| A021044_01 | At4g24780    | putative pectate lyase; proteir  | 0 | -1.13 | -0.44 | -0.09 | -0.30 | -1.95 | -2.59 | 1.2 | 0.06 | 1.80  | 0.32  |
| A021046_01 | At2g34480    | 60S ribosomal protein L18A; j    | 0 | -0.72 | -0.96 | -0.91 | -1.40 | -1.43 | -1.07 | 0.8 | 0.48 | 2.68  | -0.27 |
| A021049_01 | At2g27720    | 60S acidic ribosomal protein l   | 0 | -0.55 | -0.74 | -0.76 | -1.46 | -1.58 | -1.42 | 0.9 | 0.48 | 2.68  | 0.42  |
| A021057_01 | At1g07890    | ascorbate peroxidase, putativ    | 0 | -0.68 | -0.51 | -0.54 | -1.04 | -1.09 | -0.67 | 0.7 | 2.21 | 2.38  | -0.20 |
| A021058_01 | At5g64280    | 2-oxoglutarate/malate translo    | 0 | 0.59  | 1.09  | 1.32  | 1.51  | 1.82  | 1.46  | 1.6 | 0.06 | -1.95 | -0.49 |
| A021059_01 | At1g53240    | mitochondrial NAD-dependen       | 0 | -1.13 | -1.26 | -1.15 | -1.40 | -1.78 | -1.64 | 1.6 | 0.06 | 2.76  | -0.51 |
| A021061_01 | At4g13510    | ammonium transport protein (     | 0 | 0.92  | 1.16  | 1.06  | 0.71  | 0.86  | 0.86  | 1.0 | 0.16 | -1.29 | 1.38  |
| A021062_01 | At3g53750    | actin (ACT3); protein id: At3g   | 0 | -1.11 | -1.03 | -1.00 | -1.28 | -1.41 | -1.21 | 0.8 | 0.55 | 2.66  | -0.83 |
| A021065_01 | At2g37130    | peroxidase, putative (ATP2a)     | 0 | 1.99  | 2.62  | 2.43  | 2.22  | 1.94  | 1.63  | 1.3 | 0.06 | -1.35 | 1.30  |
| A021067_01 | At1g69890    | expressed protein; protein id:   | 0 | 2.03  | 1.88  | 1.59  | 1.70  | 1.78  | 1.16  | 1.2 | 0.06 | -1.21 | 1.43  |
| A021070_01 | At3g08580    | adenylate translocator; protei   | 0 | -0.77 | -0.67 | -0.67 | -0.72 | -1.07 | -0.37 | 0.7 | 0.96 | 1.95  | -1.09 |
| A021071_01 | At4g37790    | homeobox protein HAT22; pr       | 0 | 1.16  | 1.43  | 1.93  | 2.06  | 1.66  | 2.58  | 1.2 | 0.06 | -1.95 | -0.15 |
| A021072_01 | At1g23130    | Csf-2-related; protein id: At1g  | 0 | 0.90  | 2.14  | 3.11  | 4.37  | 4.39  | 4.69  | 1.1 | 0.10 | -1.92 | -0.99 |
| A021076_01 | At4g10450    | putative ribosomal protein L9,   | 0 | -0.83 | -1.25 | -1.19 | -1.66 | -2.05 | NA    | 0.6 | 4.47 | NA    | NA    |
| A021079_01 | At1g10150    | expressed protein; protein id:   | 0 | 1.17  | 1.28  | 1.49  | 1.51  | 1.31  | 1.61  | 0.8 | 0.81 | -1.94 | 0.50  |
| A021085_01 | At5g26340    | hexose transporter - like prote  | 0 | 1.53  | 1.50  | 1.42  | 1.10  | 1.13  | 1.40  | 0.8 | 0.66 | -1.42 | 1.42  |
| A021086_01 | At1g06650    | oxidoreductase, putative; prot   | 0 | 0.68  | 0.99  | 1.16  | 1.28  | 1.44  | 1.39  | 1.3 | 0.06 | -2.05 | -0.26 |
| A021093_01 | At4g20260    | endomembrane-associated p        | 0 | 1.77  | 1.84  | 1.84  | 1.83  | 1.43  | 2.51  | 1.0 | 0.26 | -1.74 | 0.69  |
| A021097_01 | At5g42980    | thioredoxin (clone GIF1) (pir    | 0 | 0.17  | 0.61  | 1.00  | 1.01  | 0.78  | 1.64  | 0.7 | 2.21 | -1.73 | -0.90 |
| A021100_01 | At1g02780    | ribosomal protein L19, putativ   | 0 | -0.63 | -0.82 | -0.85 | -1.26 | -1.28 | -1.23 | 0.8 | 0.55 | 2.78  | -0.01 |
| A021103_01 | At5g62920    | response regulator 6 (ARR6);     | 0 | -0.79 | -0.29 | 0.01  | -0.92 | -0.68 | -1.07 | 0.6 | 4.47 | 1.56  | 0.07  |
| A021107_01 | At5g64680    | unknown protein; protein id: A   | 0 | -0.13 | -0.59 | -0.59 | -1.46 | -1.50 | -1.42 | 1.4 | 0.06 | 2.54  | 0.85  |
| A021129_01 | At1g59870    | A.t. fasciclin-like arabinogalac | 0 | 0.87  | 1.81  | 2.01  | 2.38  | 2.18  | 2.38  | 1.6 | 0.06 | -1.96 | -0.29 |
| A021130_01 | At1g09070    | expressed protein; protein id:   | 0 | 1.09  | 1.31  | 1.16  | 1.00  | 0.88  | 1.38  | 1.1 | 0.10 | -1.57 | 1.08  |
| A021131_01 | At1g76180    | dehydrin, putative; protein id:  | 0 | 1.27  | 1.02  | 1.07  | 0.89  | 0.12  | 0.80  | 0.7 | 1.61 | -0.41 | 1.80  |
| A021133_01 | At1g11190    | bifunctional nuclease bfn1; pr   | 0 | 2.90  | 2.80  | 2.04  | 1.36  | 0.68  | 1.44  | 1.2 | 0.06 | -0.25 | 2.12  |
| A021137_01 | At1g64370    | expressed protein; protein id:   | 0 | 0.94  | 2.06  | 2.68  | 4.03  | 3.88  | 4.40  | 1.1 | 0.10 | -1.94 | -0.94 |
| A021140_01 | xxxx         | b/t hypothetical protein; protei | 0 | 0.08  | 0.32  | 0.44  | 0.47  | 0.32  | 1.01  | 0.7 | 2.21 | -1.51 | -0.90 |
| A021142_01 | not annotate | Chr1 W/13147608-13147677         | 0 | 0.58  | 0.80  | 1.15  | 1.24  | 1.40  | 1.67  | 0.8 | 0.66 | -2.01 | -0.69 |
| A021147_01 | At5g07220    | putative protein; protein id: At | 0 | 0.94  | 1.15  | 1.19  | 1.61  | 1.25  | 1.71  | 0.7 | 1.61 | -2.00 | 0.03  |
| A021209_01 | not annotate | Chr4 C/16247353-162473961        | 0 | 0.34  | 0.86  | 1.06  | 1.14  | 1.69  | 1.75  | 0.9 | 0.31 | -1.91 | -0.89 |
| A021213_01 | At1g07820    | histone H4; protein id: At1g07   | 0 | -1.16 | -1.32 | -1.01 | -1.09 | -1.04 | -1.18 | 1.2 | 0.06 | 2.37  | -1.61 |
| A021222_01 | At3g62250    | ubiquitin extension protein (U   | 0 | -0.58 | -0.79 | -0.78 | -1.35 | -1.59 | -1.44 | 1.0 | 0.16 | 2.72  | 0.34  |
| A021230_01 | At3g49580    | putative protein; protein id: At | 0 | -0.60 | 0.45  | 1.98  | 2.01  | 2.77  | 4.86  | 1.3 | 0.06 | -1.44 | -1.61 |



|            |               |                                  |   |       |       |       |       |       |       |     |      |       |       |
|------------|---------------|----------------------------------|---|-------|-------|-------|-------|-------|-------|-----|------|-------|-------|
| A021233_01 | At3g59540     | 60S RIBOSOMAL PROTEIN            | 0 | -0.79 | -0.93 | -0.86 | -1.37 | -1.58 | -1.58 | 0.9 | 0.27 | 2.77  | 0.05  |
| A021235_01 | At3g55170     | ribosomal protein L35 -like; p   | 0 | -0.59 | -0.65 | -0.68 | -0.86 | -0.80 | -1.06 | 0.7 | 1.61 | 2.78  | -0.40 |
| A021249_01 | At1g07610     | metallothionein-like protein; p  | 0 | 1.24  | 2.06  | 2.61  | 2.83  | 3.06  | 4.50  | 1.9 | 0.06 | -1.94 | -0.67 |
| A021252_01 | At3g45030     | 40S ribosomal protein; prot      | 0 | -0.50 | -0.81 | -0.78 | -1.37 | -1.50 | -1.40 | 0.8 | 0.66 | 2.73  | 0.35  |
| A021253_01 | At5g15200     | 40S ribosomal protein - like; p  | 0 | -0.66 | -1.24 | -1.26 | -1.87 | -2.28 | -2.21 | 0.9 | 0.41 | 2.73  | 0.41  |
| A021261_01 | At4g36130     | putative ribosomal protein L8;   | 0 | -0.37 | -0.76 | -0.72 | -1.43 | -1.54 | -1.56 | 0.7 | 1.20 | 2.64  | 0.61  |
| A021274_01 | At4g26230     | putative ribosomal protein; pr   | 0 | -0.46 | -0.76 | -0.83 | -1.37 | -1.58 | -1.72 | 1.0 | 0.20 | 2.71  | 0.52  |
| A021293_01 | At4g29770     | expressed protein; protein id:   | 0 | -0.75 | -1.42 | -1.26 | -1.47 | -1.59 | -1.38 | 1.9 | 0.06 | 2.58  | -0.57 |
| A021299_01 | At4g29760     | putative protein; protein id: At | 0 | -1.17 | -1.90 | -1.70 | -2.28 | -2.07 | -2.01 | 1.7 | 0.06 | 2.68  | -0.56 |
| A021309_01 | At4g01060     | myb family transcription facto   | 0 | 1.34  | 2.03  | 2.35  | 2.68  | 2.94  | 2.70  | 1.1 | 0.14 | -2.04 | -0.29 |
| A021335_01 | At4g15700     | glutaredoxin homolog; proteir    | 0 | 1.51  | 1.80  | 1.58  | 0.71  | 1.74  | 1.89  | 0.6 | 2.21 | -1.42 | 0.86  |
| A021338_01 | At4g30330     | small nuclear ribonucleoprote    | 0 | -1.32 | -1.86 | -1.53 | -1.75 | -1.96 | -2.29 | 1.2 | 0.06 | 2.75  | -0.65 |
| A021339_01 | At5g01610     | putative protein; protein id: At | 0 | 0.22  | 0.33  | 1.00  | 0.93  | 1.00  | 1.31  | 0.7 | 2.21 | -1.76 | -1.25 |
| A021344_01 | At5g07090     | 40S ribosomal protein S4; prc    | 0 | -0.43 | -0.92 | -0.94 | -1.54 | -1.81 | -1.88 | 0.7 | 1.61 | 2.67  | 0.58  |
| A021347_01 | At5g07580     | transcription factor-like protei | 0 | 0.02  | 0.50  | 0.73  | 0.97  | 1.02  | 0.86  | 0.9 | 0.27 | -1.76 | -1.05 |
| A021375_01 | At5g10980     | histone H3 protein               | 0 | 0.09  | 0.31  | 0.56  | 0.69  | 0.72  | 1.05  | 0.9 | 0.41 | -1.80 | -1.16 |
| A021377_01 | At3g26860     | putative self-incompatibility pr | 0 | -0.14 | 0.46  | 0.87  | 1.01  | 0.89  | 1.47  | 1.0 | 0.20 | -1.67 | -1.27 |
| A021389_01 | At3g18740     | 60S ribosomal protein, putativ   | 0 | -0.88 | -1.16 | -1.14 | -1.69 | -1.65 | -1.81 | 1.0 | 0.16 | 2.81  | -0.07 |
| A021419_01 | At5g24660     | putative protein; protein id: At | 0 | -0.38 | 0.67  | 1.93  | 1.73  | 1.99  | 3.51  | 1.2 | 0.06 | -1.57 | -1.47 |
| A021434_01 | At5g45750     | putative Rab-type small GTP-     | 0 | -0.75 | -0.78 | -0.97 | -1.26 | -1.68 | -1.83 | 0.9 | 0.31 | 2.73  | 0.25  |
| A021441_01 | At5g59840     | GTP-binding protein ara-3; pr    | 0 | 0.95  | 0.83  | 0.83  | 0.97  | 1.03  | 1.43  | 1.0 | 0.16 | -1.84 | 0.15  |
| A021466_01 | At5g38760     | pollen coat -like protein; prote | 0 | 0.69  | 0.80  | 1.13  | 1.14  | 1.37  | 1.48  | 0.9 | 0.37 | -2.00 | -0.35 |
| A021476_01 | At5g05590     | phosphoribosylanthranilate is    | 0 | -0.14 | -0.42 | -0.53 | -0.92 | -1.13 | -1.27 | 1.0 | 0.16 | 2.55  | 0.88  |
| A021494_01 | At5g40130     | 60S RIBOSOMAL PROTEIN            | 0 | -0.69 | -0.97 | -0.85 | -1.35 | -1.55 | -1.61 | 1.1 | 0.10 | 2.80  | 0.09  |
| A021497_01 | At5g56670     | 40S ribosomal protein S30 hc     | 0 | -0.96 | -1.30 | -1.21 | -1.61 | -1.94 | -2.09 | 1.5 | 0.06 | 2.81  | -0.07 |
| A021500_01 | At5g47700     | 60S acidic ribosomal protein l   | 0 | -0.74 | -0.97 | -0.87 | -1.46 | -1.52 | -1.47 | 1.0 | 0.20 | 2.79  | -0.01 |
| A021510_01 | At5g58420     | ribosomal protein S4 - like; pr  | 0 | -0.72 | -1.26 | -1.20 | -1.70 | -1.91 | -2.03 | 1.1 | 0.14 | 2.79  | 0.17  |
| A021517_01 | At5g09510     | ribosomal protein S15-like; pr   | 0 | -0.55 | -0.76 | -0.77 | -1.15 | -1.17 | -1.26 | 0.7 | 1.61 | 2.77  | 0.12  |
| A021520_01 | At2g02390     | glutathione transferase, putat   | 0 | 1.17  | 1.43  | 1.34  | 1.33  | 1.81  | 2.12  | 0.9 | 0.41 | -1.94 | -0.01 |
| A021529_01 | not annotated | Chr3 C/10728051-10728120         | 0 | 0.56  | 0.54  | 0.77  | 0.96  | 1.01  | 0.98  | 0.8 | 0.96 | -2.00 | -0.44 |
| A021539_01 | At1g29410     | phosphoribosylanthranilate is    | 0 | -0.28 | -0.54 | -0.56 | -0.75 | -0.87 | -1.19 | 0.9 | 0.48 | 2.69  | 0.38  |
| A021542_01 | At1g54690     | histone H2A, putative; protein   | 0 | -1.09 | -0.84 | -0.62 | -0.76 | -0.60 | -1.04 | 0.7 | 1.61 | 2.04  | -1.62 |
| A021549_01 | At1g26910     | putative 60s ribosomal proteir   | 0 | -0.59 | -0.81 | -0.79 | -1.05 | -0.89 | -0.70 | 0.8 | 0.55 | 2.54  | -0.77 |
| A021551_01 | At1g04470     | unknown protein; protein id: A   | 0 | -1.06 | -1.28 | -1.24 | -1.04 | -0.98 | -1.57 | 0.8 | 0.55 | 2.42  | -1.20 |
| A021557_01 | At1g51250     | unknown protein; protein id: A   | 0 | -0.31 | 0.11  | 0.67  | 0.70  | 0.86  | 1.43  | 0.9 | 0.41 | -1.45 | -1.69 |
| A021562_01 | At1g13990     | expressed protein; protein id:   | 0 | 2.00  | 2.46  | 2.57  | 2.85  | 3.02  | 3.17  | 1.7 | 0.06 | -2.05 | 0.14  |
| A021565_01 | At3g46560     | small zinc finger-like protein T | 0 | -0.99 | -1.10 | -1.06 | -1.60 | -1.73 | -1.61 | 1.5 | 0.06 | 2.77  | -0.17 |
| A021577_01 | At1g01100     | acidic ribosomal protein, puta   | 0 | -0.58 | -1.01 | -0.96 | -1.49 | -1.43 | -1.56 | 1.0 | 0.16 | 2.78  | 0.12  |
| A021585_01 | At2g18990     | putative ATP binding protein;    | 0 | -1.16 | -1.29 | -1.31 | -1.48 | -1.49 | -1.85 | 1.1 | 0.10 | 2.77  | -0.62 |
| A021589_01 | At2g26750     | putative epoxide hydrolase; p    | 0 | 0.67  | 0.98  | 0.93  | 0.78  | 1.05  | 1.26  | 0.9 | 0.26 | -1.93 | 0.22  |
| A021594_01 | At2g29320     | putative tropinone reductase;    | 0 | 0.97  | 1.17  | 1.26  | 1.81  | 1.85  | 1.81  | 1.7 | 0.06 | -2.04 | -0.35 |
| A021595_01 | At2g29370     | putative tropinone reductase;    | 0 | 0.07  | 1.09  | 1.80  | 2.78  | 3.11  | 3.15  | 1.2 | 0.06 | -1.78 | -1.36 |
| A021601_01 | At2g37600     | 60S ribosomal protein L36; pr    | 0 | -0.63 | -1.11 | -1.02 | -1.55 | -1.59 | -1.70 | 1.0 | 0.16 | 2.79  | 0.11  |
| A021607_01 | At2g24040     | unknown protein; protein id: A   | 0 | 0.80  | 1.06  | 1.11  | 1.41  | 1.43  | 1.76  | 1.0 | 0.16 | -2.02 | -0.37 |

|            |           |                                                                      |   |       |       |       |       |       |       |     |      |       |       |
|------------|-----------|----------------------------------------------------------------------|---|-------|-------|-------|-------|-------|-------|-----|------|-------|-------|
| A021613_01 | At2g28740 | histone H4; protein id: At2g28740                                    | 0 | -1.62 | -1.90 | -1.43 | -1.44 | -1.73 | -1.96 | 0.9 | 0.31 | 2.50  | -1.33 |
| A021628_01 | At2g32190 | expressed protein; protein id: At2g32190                             | 0 | 1.93  | 2.35  | 1.89  | 1.05  | 0.82  | 1.90  | 1.2 | 0.06 | -0.83 | 1.67  |
| A021629_01 | At2g32210 | expressed protein; protein id: At2g32210                             | 0 | 2.26  | 2.33  | 1.95  | 1.66  | 1.75  | 2.45  | 1.3 | 0.06 | -1.51 | 1.18  |
| A021641_01 | At2g05310 | expressed protein; protein id: At2g05310                             | 0 | 0.83  | 0.99  | 0.86  | 1.20  | 1.13  | 0.80  | 0.9 | 0.48 | -1.73 | 0.53  |
| A021647_01 | At2g20450 | 60S ribosomal protein L14; protein id: At2g20450                     | 0 | -0.66 | -0.97 | -0.81 | -1.19 | -1.39 | -1.39 | 0.9 | 0.27 | 2.80  | -0.07 |
| A021659_01 | At2g07640 | unknown protein; protein id: At2g07640                               | 0 | 0.22  | 0.47  | 0.21  | 0.55  | 1.24  | 1.25  | 0.9 | 0.27 | -1.58 | -1.14 |
| A021670_01 | At1g13990 | expressed protein; protein id: At1g13990                             | 0 | 2.23  | 2.59  | 2.71  | 2.95  | 3.21  | 3.30  | 2.2 | 0.06 | -2.03 | 0.22  |
| A021696_01 | At1g29250 | expressed protein; protein id: At1g29250                             | 0 | -0.98 | -1.07 | -0.88 | -1.31 | -1.54 | -1.62 | 2.0 | 0.06 | 2.71  | -0.25 |
| A021701_01 | At1g27400 | putative 60S ribosomal protein L29; protein id: At1g27400            | 0 | -0.94 | -1.25 | -1.23 | -1.77 | -1.87 | -1.94 | 1.1 | 0.10 | 2.81  | -0.05 |
| A021708_01 | At1g12250 | chloroplast lumen pentapeptide repeat domain; protein id: At1g12250  | 0 | 0.68  | 0.75  | 0.67  | 0.80  | 1.06  | 0.73  | 0.7 | 1.61 | -1.82 | 0.37  |
| A021709_01 | At1g49660 | unknown protein; protein id: At1g49660                               | 0 | 0.77  | 1.17  | 1.60  | 2.43  | 2.07  | 2.69  | 0.7 | 1.61 | -1.95 | -0.84 |
| A021712_01 | At1g3135  | pseudogene, putative 60s ribosomal protein L29; protein id: At1g3135 | 0 | -0.89 | -1.33 | -1.35 | -1.81 | -1.90 | -2.19 | 1.2 | 0.06 | 2.80  | 0.05  |
| A021718_01 | At1g52250 | dynein light chain, putative; protein id: At1g52250                  | 0 | 0.99  | -0.11 | -0.46 | -1.27 | -2.04 | NA    | 0.7 | 2.21 | NA    | NA    |
| A021724_01 | At1g65345 | pseudogene, putative polyubiquitin domain; protein id: At1g65345     | 0 | 0.61  | 0.53  | 0.82  | 1.01  | 0.85  | 1.07  | 0.8 | 0.48 | -1.93 | -0.36 |
| A021726_01 | At1g07070 | ribosomal protein, putative; protein id: At1g07070                   | 0 | -1.08 | -1.45 | -1.20 | -1.02 | -1.36 | -1.97 | 1.5 | 0.06 | 2.56  | -0.78 |
| A021730_01 | At3g06680 | ribosomal protein L29, putative; protein id: At3g06680               | 0 | -0.97 | -1.08 | -0.96 | -1.75 | -1.93 | -1.72 | 1.3 | 0.06 | 2.75  | 0.02  |
| A021739_01 | At3g11500 | putative small nuclear ribonucleoprotein A1; protein id: At3g11500   | 0 | -0.94 | -0.94 | -0.79 | -0.96 | -1.06 | -1.23 | 0.7 | 1.61 | 2.68  | -0.96 |
| A021749_01 | At1g29460 | auxin-induced protein, putative; protein id: At1g29460               | 0 | 0.83  | 0.22  | -0.03 | -0.88 | -1.29 | -1.92 | 0.9 | 0.37 | 2.02  | 1.54  |
| A021759_01 | At1g70680 | Ca <sup>2+</sup> -binding EF-hand domain; protein id: At1g70680      | 0 | 3.08  | 3.00  | 2.88  | 2.76  | 2.04  | 3.45  | 1.4 | 0.06 | -1.55 | 1.13  |
| A021760_01 | At1g70670 | Ca <sup>2+</sup> -binding EF-hand domain; protein id: At1g70670      | 0 | 1.58  | 1.12  | 0.87  | 0.85  | 0.37  | 1.28  | 1.0 | 0.18 | -0.68 | 1.53  |
| A021771_01 | At3g02190 | putative ribosomal protein L31; protein id: At3g02190                | 0 | -0.58 | -0.91 | -0.79 | -1.20 | -1.62 | -1.47 | 1.7 | 0.06 | 2.75  | 0.21  |
| A021782_01 | At3g09500 | putative 60S ribosomal protein L29; protein id: At3g09500            | 0 | -0.55 | -1.02 | -1.01 | -1.41 | -1.47 | -1.66 | 0.9 | 0.31 | 2.78  | 0.18  |
| A021794_01 | At2g02500 | putative sugar nucleotide phosphorylase; protein id: At2g02500       | 0 | -1.24 | -1.45 | -1.40 | -1.15 | -1.33 | -1.95 | 0.6 | 4.47 | 2.54  | -0.99 |
| A021799_01 | At5g09770 | ribosomal protein - like; protein id: At5g09770                      | 0 | -0.67 | -0.94 | -0.90 | -0.85 | -0.60 | -0.84 | 0.8 | 0.81 | 2.28  | -1.43 |
| A021802_01 | At4g29410 | putative protein; protein id: At4g29410                              | 0 | -1.05 | -1.40 | -1.34 | -1.95 | -2.24 | -2.20 | 1.0 | 0.16 | 2.80  | 0.02  |
| A021803_01 | At3g44010 | ribosomal protein S29 - like; protein id: At3g44010                  | 0 | -0.56 | -0.62 | -0.54 | -0.90 | -1.11 | -0.99 | 0.9 | 0.26 | 2.73  | 0.02  |
| A021805_01 | At2g46370 | putative auxin-responsive protein; protein id: At2g46370             | 0 | 0.05  | 0.29  | 0.55  | 0.68  | 0.81  | 1.07  | 0.7 | 1.20 | -1.77 | -1.24 |
| A021811_01 | At1g80920 | J8-like protein; protein id: At1g80920                               | 0 | 2.18  | 2.01  | 2.11  | 2.61  | 2.76  | 3.17  | 1.3 | 0.06 | -1.99 | 0.09  |
| A021812_01 | At4g09460 | myb family transcription factor; protein id: At4g09460               | 0 | 0.09  | -0.87 | -0.85 | -0.86 | -1.79 | -1.32 | 0.6 | 4.47 | 2.36  | 0.63  |
| A021814_01 | At2g43820 | putative glucosyltransferase; protein id: At2g43820                  | 0 | 2.09  | 2.61  | 2.49  | 2.68  | 2.75  | 3.09  | 1.3 | 0.06 | -1.99 | 0.42  |
| A021820_01 | At3g26280 | cytochrome p450 family; protein id: At3g26280                        | 0 | 1.21  | 2.35  | 2.96  | 3.38  | 3.48  | 3.57  | 2.0 | 0.06 | -2.01 | -0.53 |
| A021823_01 | At4g30810 | serine carboxypeptidase II - like; protein id: At4g30810             | 0 | -1.25 | -1.06 | -0.99 | -0.87 | -0.68 | -0.85 | 0.8 | 0.96 | 1.80  | -2.16 |
| A021829_01 | At5g10390 | histone H3 - like protein; protein id: At5g10390                     | 0 | -1.96 | -1.95 | -1.45 | -1.50 | -1.52 | -1.46 | 1.3 | 0.06 | 2.05  | -1.98 |
| A021835_01 | At5g49650 | putative xylulose kinase; protein id: At5g49650                      | 0 | 0.06  | -0.07 | 0.29  | 0.82  | 1.01  | 0.51  | 1.3 | 0.06 | -1.29 | -1.53 |
| A021843_01 | At5g65110 | acyl-CoA oxidase (gb AAC13); protein id: At5g65110                   | 0 | 0.66  | 0.83  | 0.77  | 0.83  | 0.93  | 1.39  | 1.0 | 0.18 | -1.93 | -0.07 |
| A021850_01 | At1g69410 | eukaryotic initiation factor 5A; protein id: At1g69410               | 0 | 0.66  | 1.12  | 1.07  | 1.09  | 1.12  | 1.92  | 1.0 | 0.26 | -1.88 | -0.25 |
| A021851_01 | At5g44580 | expressed protein; protein id: At5g44580                             | 0 | 1.93  | 2.64  | 2.35  | 2.36  | 2.49  | 2.34  | 1.3 | 0.06 | -1.79 | 0.78  |
| A021856_01 | At2g32060 | 40S ribosomal protein S12; protein id: At2g32060                     | 0 | -0.37 | -0.65 | -0.53 | -1.13 | -1.30 | -1.24 | 1.0 | 0.20 | 2.71  | 0.48  |
| A021857_01 | At5g56710 | 60S ribosomal protein L31; protein id: At5g56710                     | 0 | -0.61 | -0.98 | -0.90 | -1.50 | -1.77 | -1.73 | 1.3 | 0.06 | 2.74  | 0.34  |
| A021867_01 | At2g40110 | unknown protein; protein id: At2g40110                               | 0 | 0.88  | 0.80  | 0.92  | 1.20  | 1.10  | 1.16  | 0.7 | 2.21 | -1.91 | 0.06  |
| A021873_01 | At5g18630 | triacylglycerol lipase-like protein; protein id: At5g18630           | 0 | 1.37  | 1.44  | 1.49  | 1.80  | 1.98  | 2.20  | 2.1 | 0.06 | -2.03 | -0.01 |
| A021874_01 | At3g19800 | expressed protein; protein id: At3g19800                             | 0 | 1.19  | 1.25  | 1.35  | 1.69  | 1.77  | 2.13  | 1.5 | 0.06 | -2.04 | -0.16 |
| A021882_01 | At5g14180 | putative protein; protein id: At5g14180                              | 0 | 2.17  | 2.12  | 1.65  | 0.72  | 0.31  | 0.88  | 0.7 | 1.61 | 0.04  | 2.18  |
| A021884_01 | At1g23290 | 60s ribosomal protein l27a.; protein id: At1g23290                   | 0 | -0.69 | -1.07 | -1.04 | -1.65 | -1.97 | -1.84 | 1.3 | 0.06 | 2.75  | 0.29  |

|            |           |                                  |   |       |       |       |       |       |       |     |      |       |       |
|------------|-----------|----------------------------------|---|-------|-------|-------|-------|-------|-------|-----|------|-------|-------|
| A021889_01 | At5g02610 | ribosomal protein L35 - like; p  | 0 | -0.41 | -0.54 | -0.63 | -1.09 | -1.32 | -1.33 | 1.0 | 0.18 | 2.65  | 0.59  |
| A021890_01 | At4g11360 | RING-H2 finger protein RHA1      | 0 | 2.29  | 1.84  | 1.91  | 1.80  | 1.78  | 1.64  | 0.8 | 0.48 | -1.38 | 1.36  |
| A021891_01 | At4g14320 | ribosomal protein; protein id: . | 0 | -0.88 | -0.95 | -0.83 | -1.23 | -1.40 | -1.27 | 1.1 | 0.10 | 2.76  | -0.38 |
| A021893_01 | At4g04830 | putative protein; protein id: At | 0 | -0.14 | 0.69  | 1.87  | 2.41  | 2.84  | 3.55  | 2.5 | 0.06 | -1.67 | -1.52 |
| A021903_01 | At3g61640 | arabinogalactan-protein (AGF     | 0 | -0.48 | -0.25 | -0.35 | -0.98 | -1.06 | -1.10 | 0.7 | 1.61 | 2.44  | 0.61  |
| A021905_01 | At3g53740 | 60S RIBOSOMAL PROTEIN            | 0 | -0.46 | -0.70 | -0.65 | -0.94 | -1.18 | -1.26 | 0.7 | 1.61 | 2.77  | 0.20  |
| A021907_01 | At1g72510 | arabinogalactan-protein (AGF     | 0 | 0.81  | 1.26  | 1.41  | 1.42  | 1.41  | 1.45  | 1.1 | 0.14 | -1.93 | 0.17  |
| A021908_01 | At1g09200 | expressed protein; protein id:   | 0 | -1.98 | -2.15 | -1.53 | -2.01 | -1.97 | -1.92 | 0.9 | 0.37 | 2.45  | -1.48 |
| A021909_01 | At1g57860 | 60S ribosomal protein L21, pr    | 0 | -0.21 | -0.56 | -0.54 | -1.11 | -1.28 | -1.39 | 0.8 | 0.81 | 2.61  | 0.76  |
| A021913_01 | xxxx      | b/t pseudogene, putative retrc   | 0 | 1.26  | 1.37  | 1.91  | 2.37  | 2.56  | 2.71  | 1.2 | 0.06 | -1.99 | -0.61 |
| A021920_01 | At5g63330 | putative protein; protein id: At | 0 | 0.18  | 0.55  | 0.81  | 1.18  | 1.27  | 1.24  | 0.9 | 0.26 | -1.88 | -1.10 |
| A021922_01 | At1g10500 | unknown protein; protein id: A   | 0 | 0.58  | 1.06  | 1.21  | 1.41  | 1.42  | 1.80  | 1.6 | 0.06 | -2.02 | -0.51 |
| A021930_01 | At3g46320 | F12M12.3; pseudogene, puta       | 0 | -1.79 | -2.10 | -1.38 | -1.68 | -1.95 | -1.86 | 1.6 | 0.06 | 2.46  | -1.43 |
| A021931_01 | At3g14600 | putative 60S ribosomal protei    | 0 | -0.76 | -1.33 | -1.32 | -1.85 | -1.79 | -1.97 | 0.9 | 0.41 | 2.79  | 0.05  |
| A021932_01 | At5g03850 | ribosomal protein S28- like; p   | 0 | -0.72 | -0.81 | -0.69 | -1.17 | -1.30 | -1.10 | 1.0 | 0.16 | 2.73  | -0.20 |
| A021933_01 | At2g19750 | 40S ribosomal protein S30; pr    | 0 | -0.54 | -0.60 | -0.52 | -0.91 | -1.08 | -1.03 | 1.0 | 0.16 | 2.75  | 0.07  |
| A021937_01 | At1g14870 | unknown protein; protein id: A   | 0 | 1.74  | 1.83  | 0.98  | 0.57  | -0.18 | 0.27  | 1.1 | 0.14 | 0.48  | 2.17  |
| A021938_01 | At1g26880 | 60s ribosomal protein L34; pr    | 0 | -0.92 | -1.20 | -1.04 | -1.42 | -1.55 | -1.53 | 1.5 | 0.06 | 2.80  | -0.41 |
| A021941_01 | At3g27360 | histone H3, putative; protein i  | 0 | -2.10 | -3.11 | -2.40 | -3.05 | -3.37 | -3.42 | 1.5 | 0.06 | 2.74  | -0.70 |
| A021942_01 | At1g13990 | expressed protein; protein id:   | 0 | 2.10  | 2.54  | 2.65  | 2.87  | 3.14  | 3.28  | 1.6 | 0.06 | -2.04 | 0.17  |
| A021949_01 | At1g14850 | nucleoporin, putative; protein   | 0 | -0.64 | -0.85 | -0.85 | -1.32 | -1.36 | -0.93 | 0.7 | 2.21 | 2.62  | -0.21 |
| A021950_01 | At3g53430 | 60S RIBOSOMAL PROTEIN            | 0 | -0.42 | -0.66 | -0.59 | -1.12 | -1.35 | -1.16 | 1.0 | 0.14 | 2.68  | 0.42  |
| A021955_01 | At1g22270 | expressed protein; protein id:   | 0 | -0.68 | -0.79 | -0.58 | -0.90 | -0.99 | -1.11 | 0.6 | 4.47 | 2.78  | -0.47 |
| A021961_01 | At2g36170 | ubiquitin extension protein (U   | 0 | -0.83 | -1.10 | -1.04 | -1.57 | -1.74 | -1.65 | 1.2 | 0.06 | 2.79  | -0.01 |
| A021966_01 | At3g43810 | calmodulin 7; protein id: At3g   | 0 | -1.03 | -0.95 | -0.85 | -1.15 | -1.54 | -1.42 | 0.8 | 0.48 | 2.71  | -0.45 |
| A021968_01 | At3g53990 | expressed protein; protein id:   | 0 | 1.19  | 1.07  | 0.91  | 0.86  | 0.48  | 0.48  | 1.1 | 0.10 | -0.50 | 1.99  |
| A021971_01 | At5g35530 | 40S ribosomal protein S3; prc    | 0 | -0.36 | -0.81 | -0.68 | -1.15 | -1.18 | -1.22 | 0.7 | 1.61 | 2.73  | 0.29  |
| A021976_01 | At1g62080 | expressed protein; protein id:   | 0 | 0.39  | 0.84  | 2.21  | 5.05  | 4.73  | 3.81  | 0.7 | 1.61 | -1.62 | -1.37 |
| A021978_01 | At1g08630 | expressed protein; protein id:   | 0 | 1.76  | 0.81  | 0.09  | -0.05 | -0.24 | -0.56 | 1.2 | 0.06 | 1.18  | 1.73  |
| A021982_01 | At2g44120 | 60S ribosomal protein L7; prc    | 0 | -0.47 | -1.17 | -1.21 | -2.03 | -2.25 | -2.16 | 1.0 | 0.18 | 2.68  | 0.56  |
| A021986_01 | At3g61110 | ribosomal protein S27; proteir   | 0 | -0.30 | -0.36 | -0.28 | -0.69 | -1.04 | -0.67 | 0.7 | 2.21 | 2.50  | 0.47  |
| A021992_01 | At2g27710 | 60S acidic ribosomal protein l   | 0 | -0.82 | -0.88 | -0.95 | -1.59 | -1.84 | -1.66 | 1.0 | 0.26 | 2.69  | 0.25  |
| A021993_01 | At4g21980 | AtAPG8a; symbiosis-related l     | 0 | 1.16  | 1.32  | 1.33  | 1.62  | 1.60  | 2.04  | 0.9 | 0.27 | -2.02 | -0.02 |
| A021994_01 | At1g74060 | putative 60S ribosomal protei    | 0 | -0.44 | -0.84 | -0.65 | -1.18 | -1.11 | -1.04 | 0.7 | 1.61 | 2.74  | 0.00  |
| A021997_01 | At5g16130 | 40S ribosomal protein S7-like    | 0 | -0.57 | -1.09 | -1.12 | -1.85 | -2.48 | -2.40 | 1.1 | 0.14 | 2.65  | 0.62  |
| A021998_01 | At2g02100 | plant defensin protein, putativ  | 0 | -1.87 | -2.40 | -1.70 | -2.68 | -3.05 | -3.25 | 1.4 | 0.06 | 2.80  | -0.41 |
| A022000_01 | At5g56540 | arabinogalactan-protein (AGF     | 0 | 2.33  | 1.67  | 0.80  | -0.29 | -0.24 | 0.47  | 0.8 | 0.96 | 0.75  | 1.95  |
| A022001_01 | At1g62000 | hypothetical protein; protein ic | 0 | -0.28 | -0.08 | 3.48  | 3.53  | 3.41  | 2.75  | 0.9 | 0.41 | -1.35 | -1.69 |
| A022009_01 | At3g23390 | putative ribosomal protein; pr   | 0 | -0.95 | -1.12 | -1.07 | -1.61 | -1.71 | -1.59 | 1.7 | 0.06 | 2.78  | -0.18 |
| A022010_01 | At4g18100 | ribosomal protein L32 -like pr   | 0 | -0.89 | -1.34 | -1.30 | -1.86 | -2.13 | -2.13 | 1.0 | 0.14 | 2.80  | 0.10  |
| A022015_01 | At5g56150 | E2, ubiquitin-conjugating enzy   | 0 | 0.47  | 0.95  | 1.13  | 1.21  | 1.00  | 1.67  | 1.1 | 0.14 | -1.92 | -0.42 |
| A022018_01 | At3g52580 | putative ribosomal protein S1    | 0 | -0.65 | -1.00 | -0.92 | -1.40 | -1.42 | -1.41 | 0.8 | 0.55 | 2.79  | -0.01 |
| A022019_01 | At3g48690 | putative protein; protein id: At | 0 | 1.08  | 0.99  | 0.94  | 0.88  | 0.94  | 1.14  | 1.3 | 0.06 | -1.68 | 0.99  |
| A022021_01 | At3g11940 | 40S ribosomal protein S5, pu     | 0 | -0.86 | -1.46 | -1.47 | -1.95 | -2.14 | -2.01 | 1.3 | 0.06 | 2.78  | -0.01 |

|            |           |                                  |   |       |       |       |       |       |       |     |      |       |       |
|------------|-----------|----------------------------------|---|-------|-------|-------|-------|-------|-------|-----|------|-------|-------|
| A022026_01 | At4g15000 | ribosomal protein; protein id: . | 0 | -0.69 | -1.12 | -1.23 | -1.92 | -2.11 | -1.96 | 1.0 | 0.18 | 2.73  | 0.35  |
| A022029_01 | At4g05050 | polyubiquitin UBQ11; protein     | 0 | 0.84  | 0.93  | 1.07  | 1.09  | 0.93  | 1.55  | 0.6 | 4.47 | -1.91 | 0.15  |
| A022039_01 | At3g26450 | major latex protein (MLP)-rela   | 0 | 0.56  | 1.03  | 0.46  | -0.15 | -0.80 | -1.06 | 1.3 | 0.06 | 1.38  | 1.72  |
| A022044_01 | At3g25520 | ribosomal protein, putative; pi  | 0 | -0.59 | -0.99 | -1.01 | -1.83 | -2.08 | -2.02 | 0.8 | 0.48 | 2.67  | 0.54  |
| A022045_01 | At1g78380 | glutathione transferase, putat   | 0 | -0.40 | 0.17  | 0.48  | 0.36  | 0.40  | 1.03  | 0.9 | 0.31 | -1.27 | -1.58 |
| A022047_01 | At1g67430 | ribosomal protein, putative; pi  | 0 | -1.11 | -1.37 | -1.20 | -1.74 | -1.90 | -1.89 | 1.4 | 0.06 | 2.81  | -0.29 |
| A022077_01 | At3g28070 | unknown protein; protein id: A   | 0 | 0.70  | 1.23  | 1.62  | 1.97  | 2.04  | 2.42  | 1.1 | 0.10 | -2.01 | -0.74 |
| A022107_01 | At4g34670 | Putative S-phase-specific ribo   | 0 | -0.51 | -1.12 | -1.09 | -1.56 | -1.74 | -1.63 | 0.9 | 0.31 | 2.75  | 0.23  |
| A022112_01 | At2g39890 | proline transporter 1; protein i | 0 | 0.71  | 1.17  | 1.41  | 1.51  | 1.46  | 1.88  | 0.8 | 0.55 | -2.04 | -0.38 |
| A022120_01 | At3g08720 | putative ribosomal-protein S6    | 0 | 0.63  | 1.03  | 0.85  | 0.71  | 0.95  | 1.49  | 0.8 | 0.96 | -1.79 | 0.08  |
| A022125_01 | At1g13080 | cytochrome p450 family; prot     | 0 | 1.01  | 0.95  | 1.00  | 1.16  | 1.35  | 1.44  | 1.1 | 0.10 | -2.00 | 0.14  |
| A022156_01 | xxxx      | b/t crooked neck-like protein;   | 0 | 0.78  | 0.78  | 0.94  | 0.76  | 0.79  | 1.02  | 0.9 | 0.27 | -1.87 | 0.66  |
| A022202_01 | At3g60450 | putative protein; protein id: At | 0 | -0.40 | -0.57 | -0.82 | -1.15 | -1.15 | -1.11 | 0.7 | 2.21 | 2.71  | 0.32  |
| A022267_01 | At5g10550 | bromodomain protein - like; p    | 0 | -0.12 | -0.19 | -0.39 | -1.01 | -0.78 | -0.77 | 0.8 | 0.66 | 2.37  | 0.89  |
| A022275_01 | At5g65700 | leucine-rich repeat transmem     | 0 | -0.12 | -0.26 | -0.33 | -0.72 | -1.45 | -1.19 | 1.2 | 0.06 | 2.28  | 1.02  |
| A022282_01 | At4g28360 | expressed protein; protein id:   | 0 | -1.10 | -1.28 | -1.24 | -1.78 | -1.42 | -1.75 | 0.9 | 0.27 | 2.74  | -0.56 |
| A022306_01 | At4g32320 | ascorbate peroxidase family;     | 0 | 0.55  | 0.80  | 0.98  | 1.46  | 1.54  | 1.38  | 1.8 | 0.06 | -1.95 | -0.75 |
| A022324_01 | At4g21930 | putative protein; protein id: At | 0 | 1.44  | 1.59  | 1.44  | 0.92  | 0.60  | 0.19  | 0.6 | 4.47 | -0.07 | 2.01  |
| A022358_01 | At4g23260 | putative protein; protein id: At | 0 | 0.91  | 2.02  | 2.64  | 3.08  | 3.40  | 3.31  | 0.8 | 0.81 | -1.97 | -0.70 |
| A022377_01 | At4g19860 | putative protein; protein id: At | 0 | 0.94  | 0.91  | 0.92  | 1.10  | 1.11  | 1.31  | 1.0 | 0.26 | -1.97 | 0.26  |
| A022381_01 | At4g27260 | GH3 like protein; protein id: A  | 0 | 2.11  | 1.91  | 1.38  | 0.96  | 0.64  | 0.91  | 1.2 | 0.06 | -0.25 | 2.14  |
| A022401_01 | At4g23400 | water channel - like protein; p  | 0 | 1.71  | 2.47  | 2.63  | 2.88  | 2.76  | 2.07  | 1.6 | 0.06 | -1.79 | 0.41  |
| A022405_01 | At4g33750 | hypothetical protein; protein ic | 0 | 0.35  | 0.49  | 0.81  | 0.91  | 1.03  | 0.90  | 0.8 | 0.48 | -1.97 | -0.72 |
| A022436_01 | At4g37560 | formamidase - like protein; pr   | 0 | 1.33  | 1.62  | 1.76  | 2.15  | 2.23  | 2.37  | 0.9 | 0.37 | -2.06 | -0.16 |
| A022486_01 | At4g11120 | putative translation elongator   | 0 | -0.75 | -0.80 | -0.67 | -1.17 | -1.06 | -1.14 | 0.7 | 2.21 | 2.72  | -0.34 |
| A022502_01 | At4g27820 | glycosyl hydrolase family 1; pi  | 0 | 0.34  | 0.95  | 1.11  | 0.98  | 1.08  | 1.41  | 1.3 | 0.06 | -1.95 | -0.46 |
| A022555_01 | At4g02860 | putative protein; protein id: At | 0 | 1.11  | 1.14  | 1.11  | 1.07  | 1.21  | 1.19  | 0.8 | 0.66 | -1.82 | 0.84  |
| A022583_01 | At4g07840 | putative transposon protein; p   | 0 | 0.62  | 1.09  | 0.97  | 0.64  | 0.34  | 0.65  | 0.6 | 4.47 | -0.86 | 1.48  |
| A022599_01 | At4g14290 | hypothetical protein; protein ic | 0 | -0.08 | 0.10  | 0.50  | 0.66  | 0.51  | 1.09  | 0.7 | 2.21 | -1.52 | -1.42 |
| A022635_01 | At4g37220 | cold acclimation protein homc    | 0 | -0.79 | -0.71 | -0.89 | -0.96 | -1.29 | -1.36 | 0.6 | 4.47 | 2.74  | -0.15 |
| A022637_01 | At4g37320 | cytochrome p450 family; prot     | 0 | 0.23  | 0.47  | 0.74  | 0.96  | 0.89  | 1.03  | 0.8 | 0.81 | -1.94 | -0.92 |
| A022643_01 | At5g01570 | putative protein; protein id: At | 0 | -0.06 | 0.60  | 1.20  | 1.88  | 1.67  | 1.51  | 1.1 | 0.14 | -1.67 | -1.23 |
| A022657_01 | At3g45950 | putative protein; protein id: At | 0 | -0.21 | 0.01  | 0.34  | 0.68  | 0.95  | 1.13  | 1.0 | 0.16 | -1.44 | -1.79 |
| A022689_01 | At3g56030 | putative protein; protein id: At | 0 | 0.52  | -0.48 | -0.58 | -0.73 | -1.40 | -1.14 | 0.9 | 0.48 | 2.20  | 1.14  |
| A022735_01 | At3g31390 | hypothetical protein; protein ic | 0 | 1.88  | 2.53  | 2.26  | 2.43  | 2.17  | 2.45  | 0.8 | 0.96 | -1.80 | 0.77  |
| A022749_01 | At3g20000 | membrane import protein, pu      | 0 | -0.73 | -0.81 | -0.69 | -1.06 | -0.74 | -0.91 | 1.1 | 0.10 | 2.59  | -0.95 |
| A022781_01 | At3g17700 | cyclic nucleotide-binding trans  | 0 | 0.84  | 0.91  | 1.02  | 0.98  | 0.76  | 1.27  | 0.7 | 1.20 | -1.79 | 0.59  |
| A022790_01 | At5g41370 | DNA excision repair cross-co     | 0 | -0.34 | -0.44 | -0.64 | -0.89 | -1.23 | -1.01 | 0.7 | 1.20 | 2.63  | 0.56  |
| A022804_01 | At3g30280 | acyltransferase family; proteir  | 0 | 0.17  | 0.73  | 1.13  | 1.09  | 1.28  | 1.73  | 0.8 | 0.66 | -1.85 | -0.98 |
| A022808_01 | At3g28520 | hypothetical protein; protein ic | 0 | 0.77  | 0.88  | 1.02  | 1.09  | 1.26  | 1.33  | 1.0 | 0.16 | -2.06 | -0.11 |
| A022821_01 | At5g53720 | RRM-containing protein; prote    | 0 | -1.74 | -3.85 | NA    | -4.08 | -3.93 | -3.67 | 1.7 | 0.06 | NA    | NA    |
| A022844_01 | At5g43080 | cyclin A3;1; protein id: At5g43  | 0 | -0.35 | -0.84 | -0.83 | -1.43 | -1.62 | -1.62 | 0.9 | 0.37 | 2.68  | 0.57  |
| A022862_01 | At5g55915 | nucleolar protein-like; protein  | 0 | -1.02 | -0.87 | -0.86 | -1.43 | -1.57 | -1.38 | 0.7 | 1.20 | 2.58  | -0.15 |
| A022865_01 | At3g16060 | kinesin-like protein TBK5, put   | 0 | -0.82 | -0.69 | -0.73 | -0.95 | -1.01 | -0.94 | 0.7 | 1.61 | 2.65  | -0.66 |

|            |           |                                   |   |       |       |       |       |       |       |     |      |       |       |
|------------|-----------|-----------------------------------|---|-------|-------|-------|-------|-------|-------|-----|------|-------|-------|
| A022882_01 | At5g58710 | cyclophilin ROC7; protein id: A   | 0 | -0.98 | -1.07 | -1.01 | -1.22 | -1.15 | -1.39 | 0.9 | 0.27 | 2.73  | -0.83 |
| A022919_01 | At5g61170 | 40S ribosomal protein S19 - lik   | 0 | -1.04 | -1.14 | -1.17 | -1.74 | -1.86 | -1.89 | 1.0 | 0.16 | 2.79  | -0.07 |
| A022927_01 | At5g44290 | cyclin-dependent protein kina     | 0 | 1.05  | 1.10  | 1.22  | 1.28  | 1.24  | 1.62  | 1.4 | 0.06 | -1.98 | 0.31  |
| A022967_01 | At5g49020 | arginine methyltransferase-lik    | 0 | -1.20 | -1.17 | -0.97 | -1.42 | -0.80 | NA    | 1.1 | 0.10 | NA    | NA    |
| A022987_01 | At5g38510 | putative protein; protein id: At  | 0 | 0.60  | 1.17  | 1.41  | 1.67  | 1.72  | 1.56  | 1.9 | 0.06 | -1.97 | -0.44 |
| A022990_01 | At5g38590 | putative protein; protein id: At  | 0 | -0.90 | -1.40 | -1.41 | -2.22 | -2.06 | -2.11 | 1.3 | 0.06 | 2.77  | 0.02  |
| A022996_01 | At5g38690 | putative protein; protein id: At  | 0 | -1.02 | -0.86 | -0.82 | -0.57 | -0.72 | -0.20 | 0.7 | 1.20 | 1.15  | -2.24 |
| A022999_01 | At5g63650 | serine/threonine-protein kinas    | 0 | -1.38 | -2.01 | -1.91 | -1.82 | -1.92 | -2.43 | 0.9 | 0.41 | 2.71  | -0.76 |
| A023041_01 | At5g08570 | pyruvate kinase; protein id: At   | 0 | -1.14 | -1.19 | -0.95 | -0.86 | -0.75 | -0.72 | 1.3 | 0.06 | 1.77  | -2.19 |
| A023045_01 | At5g24240 | ubiquitin; protein id: At5g2424   | 0 | 0.07  | 0.34  | 0.56  | 0.75  | 0.87  | 1.05  | 1.0 | 0.16 | -1.82 | -1.28 |
| A023079_01 | At5g42230 | serine carboxypeptidase-II lik    | 0 | 0.08  | -1.66 | -2.19 | -2.36 | -2.20 | -2.56 | 1.4 | 0.06 | 2.50  | 0.49  |
| A023114_01 | At5g47340 | palmitoyl-protein thioesterase    | 0 | 0.07  | 1.10  | 1.32  | 1.22  | 1.05  | 1.08  | 0.6 | 4.47 | -1.44 | -0.27 |
| A023119_01 | At5g63970 | putative protein; protein id: At  | 0 | 0.91  | 1.05  | 0.95  | 1.04  | 0.82  | 1.19  | 0.7 | 0.96 | -1.79 | 0.82  |
| A023130_01 | At5g51080 | putative protein; protein id: At  | 0 | -0.76 | -1.45 | -1.27 | -1.26 | -1.26 | -1.32 | 1.3 | 0.06 | 2.61  | -0.84 |
| A023137_01 | At5g06110 | cell division related protein-lik | 0 | -0.29 | -0.55 | -0.49 | -1.03 | -1.15 | -1.15 | 0.7 | 2.21 | 2.64  | 0.61  |
| A023159_01 | At1g26970 | protein kinase, putative; prote   | 0 | 0.85  | 0.94  | 0.99  | 0.86  | 1.09  | 1.52  | 0.9 | 0.41 | -1.91 | 0.15  |
| A023199_01 | At3g28650 | CHP-rich zinc finger protein, p   | 0 | -0.65 | -0.09 | 0.28  | 0.88  | 0.81  | 1.13  | 0.6 | 4.47 | -1.26 | -1.99 |
| A023228_01 | At1g23840 | expressed protein; protein id:    | 0 | 0.70  | 0.84  | 1.31  | 1.28  | 1.34  | 1.79  | 0.9 | 0.37 | -2.00 | -0.46 |
| A023242_01 | At1g54090 | hypothetical protein; protein ic  | 0 | 1.15  | 1.78  | 1.97  | 1.47  | 1.43  | 1.86  | 0.8 | 0.96 | -1.74 | 0.66  |
| A023252_01 | At1g20880 | RRM-containing protein; prote     | 0 | 0.60  | 1.28  | 1.19  | 1.86  | 1.11  | 0.89  | 0.8 | 0.81 | -1.42 | 0.23  |
| A023259_01 | At1g10300 | putative GTP-binding protein;     | 0 | 0.83  | 1.12  | 1.16  | 1.27  | 1.41  | 1.81  | 1.6 | 0.06 | -2.02 | -0.22 |
| A023272_01 | At1g21720 | 20S proteasome beta subunit       | 0 | 0.34  | 0.43  | 0.62  | 0.88  | 1.25  | 1.47  | 1.2 | 0.06 | -1.77 | -1.14 |
| A023297_01 | At1g73110 | rubisco activase, putative; pro   | 0 | -1.11 | -1.48 | -0.92 | -1.73 | -1.40 | -1.31 | 1.2 | 0.06 | 2.50  | -1.05 |
| A023329_01 | At3g46530 | disease resistance protein, R     | 0 | 1.12  | 1.26  | 1.39  | 1.32  | 1.37  | 1.51  | 1.1 | 0.10 | -1.97 | 0.50  |
| A023347_01 | At2g40590 | 40S ribosomal protein S26; p      | 0 | -0.48 | -0.70 | -0.63 | -1.19 | -1.36 | -1.26 | 0.8 | 0.81 | 2.73  | 0.36  |
| A023353_01 | At2g17110 | expressed protein; protein id:    | 0 | 1.00  | 1.19  | 1.28  | 1.36  | 1.24  | 1.47  | 1.2 | 0.06 | -1.98 | 0.40  |
| A023354_01 | At2g23200 | putative protein kinase; protei   | 0 | 0.89  | 1.75  | 1.91  | 2.07  | 2.05  | 2.13  | 1.2 | 0.06 | -1.98 | -0.16 |
| A023363_01 | At2g32920 | putative protein disulfide isom   | 0 | -0.89 | -0.86 | -0.83 | -1.01 | -1.10 | -1.19 | 1.0 | 0.18 | 2.74  | -0.72 |
| A023386_01 | At2g45800 | putative LIM-domain protein;      | 0 | 0.32  | 0.54  | 0.83  | 0.89  | 0.97  | 1.30  | 0.8 | 0.81 | -1.94 | -0.81 |
| A023389_01 | At2g45860 | hypothetical protein; protein ic  | 0 | -0.81 | -0.74 | -0.72 | -0.64 | -1.05 | -0.97 | 0.9 | 0.48 | 2.55  | -0.89 |
| A023440_01 | At2g38410 | unknown protein; protein id: A    | 0 | 0.56  | 0.91  | 1.21  | 1.42  | 1.64  | 1.85  | 1.6 | 0.06 | -2.00 | -0.76 |
| A023457_01 | At2g19720 | 40S ribosomal protein S15A;       | 0 | -0.56 | -0.77 | -0.78 | -1.44 | -1.71 | -1.73 | 0.8 | 0.55 | 2.66  | 0.53  |
| A023476_01 | At2g45970 | cytochrome P450, putative; p      | 0 | -0.71 | -1.06 | -1.21 | -1.53 | -1.93 | -1.95 | 1.5 | 0.06 | 2.77  | 0.26  |
| A023491_01 | At2g18860 | unknown protein; protein id: A    | 0 | 0.47  | 0.80  | 1.04  | 1.10  | 0.88  | 1.47  | 0.9 | 0.31 | -1.93 | -0.37 |
| A023504_01 | At2g05850 | putative serine carboxypeptid     | 0 | -0.62 | -0.14 | 0.45  | 0.27  | 0.65  | 1.18  | 0.7 | 1.20 | -1.13 | -1.89 |
| A023566_01 | At2g36580 | putative pyruvate kinase; prot    | 0 | -0.70 | -0.57 | -0.58 | -1.09 | -0.89 | -0.48 | 0.8 | 0.81 | 2.19  | -0.76 |
| A023620_01 | At2g31500 | putative calcium-dependent p      | 0 | -0.38 | 0.11  | 0.58  | 0.61  | 0.81  | 1.25  | 0.9 | 0.41 | -1.44 | -1.71 |
| A023623_01 | At2g31560 | unknown protein; protein id: A    | 0 | 1.36  | 1.03  | 0.78  | 0.63  | 0.33  | 1.04  | 0.8 | 0.66 | -0.60 | 1.74  |
| A023658_01 | At2g36080 | putative DNA-binding protein      | 0 | 1.49  | 1.44  | 1.21  | 0.79  | 1.03  | 0.86  | 1.1 | 0.10 | -0.85 | 1.83  |
| A023802_01 | At1g23350 | conserved hypothetical protei     | 0 | 0.35  | 0.74  | 1.41  | 1.51  | 1.89  | 2.35  | 0.8 | 0.81 | -1.85 | -1.10 |
| A023814_01 | At1g75600 | histone H3, putative; protein i   | 0 | 0.28  | 0.33  | 0.59  | 0.83  | 0.84  | 1.01  | 0.9 | 0.26 | -1.90 | -1.02 |
| A023818_01 | At1g21440 | hypothetical protein; protein ic  | 0 | -0.66 | -1.20 | -1.03 | -1.34 | -1.34 | -0.45 | 0.8 | 0.66 | 1.98  | -0.90 |
| A023896_01 | At1g64610 | hypothetical protein; protein ic  | 0 | 0.75  | 0.92  | 1.12  | 1.21  | 1.42  | 1.94  | 0.7 | 2.21 | -1.95 | -0.53 |
| A023904_01 | At1g49130 | CONSTANS B-box zinc finge         | 0 | 1.03  | 0.89  | 0.62  | 0.28  | 0.18  | -0.54 | 0.7 | 0.96 | 0.86  | 1.95  |

|            |               |                                  |   |       |       |       |       |       |       |     |      |       |       |
|------------|---------------|----------------------------------|---|-------|-------|-------|-------|-------|-------|-----|------|-------|-------|
| A023943_01 | At1g26120     | hypothetical protein; protein ic | 0 | 0.35  | 0.63  | 0.56  | 0.93  | 1.07  | 1.00  | 0.8 | 0.96 | -1.99 | -0.70 |
| A024026_01 | At1g70580     | putative alanine aminotransfe    | 0 | 0.52  | 1.14  | 1.14  | 1.40  | 1.41  | 1.64  | 0.9 | 0.27 | -2.00 | -0.41 |
| A024038_01 | At1g75280     | isoflavone reductase homoloç     | 0 | -0.97 | -0.10 | 0.95  | 2.67  | 2.40  | 3.21  | 0.7 | 1.20 | -1.43 | -1.81 |
| A024039_01 | At1g75300     | isoflavone reductase homoloç     | 0 | -1.46 | -0.75 | 0.09  | 1.71  | 1.34  | 1.39  | 0.7 | 1.61 | -1.02 | -2.12 |
| A024063_01 | At3g03430     | pollen allergen Bra r II; protei | 0 | 0.34  | 0.70  | 1.03  | 1.11  | 1.09  | 1.60  | 0.9 | 0.41 | -1.92 | -0.78 |
| A024092_01 | At3g04090     | hypothetical protein; protein ic | 0 | -0.04 | 0.34  | 0.62  | 1.13  | 1.16  | 1.33  | 1.7 | 0.06 | -1.71 | -1.48 |
| A024101_01 | At1g08210     | expressed protein; protein id:   | 0 | -0.46 | -1.11 | -0.97 | -1.20 | -0.96 | -1.25 | 1.0 | 0.20 | 2.50  | -0.48 |
| A024105_01 | At2g27530     | 60S ribosomal protein L10A; j    | 0 | -0.90 | -1.12 | -1.01 | -1.61 | -1.75 | -1.77 | 1.2 | 0.06 | 2.79  | -0.02 |
| A024107_01 | At1g23440     | hypothetical protein; protein ic | 0 | 1.01  | 1.29  | 1.35  | 1.54  | 1.66  | 1.93  | 1.3 | 0.06 | -2.06 | -0.12 |
| A024112_01 | At2g05220     | 40S ribosomal protein S17; pi    | 0 | -0.92 | -0.95 | -0.82 | -1.36 | -1.45 | -1.17 | 1.0 | 0.16 | 2.70  | -0.44 |
| A024174_01 | At5g24610     | putative protein; protein id: At | 0 | -0.21 | -0.69 | -0.82 | -0.77 | -0.94 | -1.40 | 1.0 | 0.16 | 2.59  | 0.33  |
| A024180_01 | At1g26930     | A.t. chromosome 1 BAC T9L2       | 0 | 0.91  | 0.80  | 0.63  | 0.46  | 0.70  | 1.12  | 0.9 | 0.37 | -1.34 | 0.82  |
| A024182_01 | At1g05560     | UDP-glucose transferase(UG       | 0 | 1.82  | 2.02  | 2.29  | 2.33  | 2.71  | 3.33  | 1.3 | 0.06 | -2.02 | -0.08 |
| A024183_01 | At5g55930     | sexual differentiation process   | 0 | 0.13  | 0.73  | 0.86  | 1.00  | 1.00  | 1.36  | 1.4 | 0.06 | -1.88 | -0.89 |
| A024195_01 | At1g51500     | ABC transporter family protein   | 0 | 0.69  | 1.31  | 1.42  | 1.53  | 1.30  | 1.27  | 1.1 | 0.10 | -1.77 | 0.22  |
| A024215_01 | At4g36250     | aldehyde dehydrogenase like      | 0 | -0.71 | -0.51 | -0.58 | -1.09 | -1.33 | -1.43 | 1.4 | 0.06 | 2.51  | 0.36  |
| A024219_01 | At5g57710     | 101 kDa heat shock protein; h    | 0 | 1.28  | 1.78  | 1.65  | 1.52  | 0.75  | 1.38  | 1.5 | 0.06 | -1.18 | 1.31  |
| A024230_01 | At4g19430     | expressed protein; protein id:   | 0 | -0.68 | 0.13  | 0.60  | 1.06  | 0.49  | -0.80 | 0.9 | 0.37 | 0.02  | -0.72 |
| A024232_01 | At1g01780     | LIM domain protein, putative;    | 0 | 0.72  | 0.56  | 0.71  | 0.70  | 0.95  | 1.30  | 1.0 | 0.20 | -1.82 | -0.23 |
| A024237_01 | At1g04630     | unknown protein; protein id: A   | 0 | -0.41 | -0.56 | -0.60 | -0.61 | -0.72 | -1.00 | 0.7 | 1.61 | 2.68  | -0.22 |
| A024249_01 | At2g40140     | putative CCCH-type zinc fing     | 0 | 1.30  | 1.54  | 1.34  | 1.15  | 1.22  | 1.56  | 1.2 | 0.06 | -1.66 | 1.06  |
| A024259_01 | At3g48340     | AtCEP2; cysteine proteinase;     | 0 | 3.46  | 3.41  | 2.35  | 0.86  | 0.24  | 1.10  | 1.3 | 0.06 | 0.26  | 2.19  |
| A024270_01 | not annotated | between At3g26390 and At3g       | 0 | 0.87  | 0.84  | 0.95  | 1.27  | 1.07  | 0.88  | 1.0 | 0.20 | -1.80 | 0.40  |
| A024291_01 | At1g14320     | tumor suppressor, putative; p    | 0 | -0.97 | -1.09 | -1.09 | -1.65 | -1.65 | -1.44 | 1.0 | 0.16 | 2.74  | -0.27 |
| A024292_01 | At1g08930     | zinc finger protein ATZF1, pu    | 0 | 0.29  | 1.11  | 1.13  | 1.31  | 1.26  | 1.34  | 0.8 | 0.81 | -1.85 | -0.42 |
| A024298_01 | At4g30270     | xyloglucan endotransglycosyl.    | 0 | 2.87  | 3.29  | 3.35  | 3.53  | 3.49  | 3.63  | 1.4 | 0.06 | -1.93 | 0.59  |
| A024299_01 | At3g12020     | kinesin-related protein; protei  | 0 | 1.50  | 1.78  | 1.75  | 2.10  | 2.05  | 2.02  | 1.6 | 0.06 | -1.99 | 0.35  |
| A024303_01 | At5g50160     | FRO1 and FRO2-like protein;      | 0 | 0.25  | 0.84  | 1.04  | 0.90  | 0.72  | 0.52  | 0.6 | 4.47 | -1.19 | 0.28  |
| A024306_01 | At1g71070     | N-acetylglucosaminyltransfer     | 0 | -0.98 | -1.03 | -0.98 | -1.21 | -1.31 | -1.29 | 1.2 | 0.06 | 2.74  | -0.70 |
| A024310_01 | At2g47110     | ubiquitin extension protein (U   | 0 | -0.72 | -1.11 | -0.96 | -1.65 | -1.86 | -1.70 | 1.1 | 0.06 | 2.74  | 0.20  |
| A024311_01 | At2g19620     | putative SF21 protein {Helian    | 0 | -0.99 | -1.34 | -1.32 | -1.84 | -1.92 | -1.98 | 1.4 | 0.06 | 2.82  | -0.14 |
| A024318_01 | At3g48930     | cytosolic ribosomal protein S1   | 0 | -1.19 | -1.41 | -1.30 | -1.88 | -2.07 | -1.97 | 1.4 | 0.06 | 2.80  | -0.26 |
| A024326_01 | At5g56870     | glycosyl hydrolase family 35 (   | 0 | 2.78  | 3.28  | 3.77  | 4.39  | 4.34  | 4.81  | 2.3 | 0.06 | -2.06 | -0.07 |
| A024331_01 | At1g24300     | unknown protein; protein id: A   | 0 | 0.56  | 0.78  | 0.86  | 0.88  | 0.71  | 1.30  | 0.9 | 0.41 | -1.89 | -0.04 |
| A024332_01 | At3g16180     | putative transport protein; pro  | 0 | -0.41 | -0.58 | -0.93 | -1.76 | -2.72 | -3.22 | 2.5 | 0.06 | 2.43  | 0.95  |
| A024343_01 | At1g56110     | SAR DNA binding protein, pu      | 0 | -1.00 | -1.06 | -0.90 | -1.61 | -2.23 | -1.68 | 1.0 | 0.20 | 2.58  | 0.13  |
| A024346_01 | At1g16190     | hypothetical protein; protein ic | 0 | -0.78 | -0.89 | -0.70 | -1.28 | -1.00 | -1.27 | 0.7 | 1.61 | 2.69  | -0.39 |
| A024349_01 | At1g72900     | disease resistance protein (TI   | 0 | 1.92  | 2.58  | 2.01  | 2.21  | 1.96  | 1.81  | 0.7 | 1.61 | -1.52 | 1.19  |
| A024350_01 | At1g62570     | flavin-containing monooxyger     | 0 | 1.35  | 1.52  | 1.48  | 1.35  | 0.98  | 1.75  | 0.8 | 0.48 | -1.61 | 0.99  |
| A024353_01 | At4g20170     | putative protein; protein id: At | 0 | 0.01  | -0.17 | -0.37 | -1.10 | -1.18 | -1.17 | 0.8 | 0.48 | 2.34  | 1.18  |
| A024354_01 | At2g39330     | putative myrosinase-binding p    | 0 | -2.40 | -3.07 | -2.35 | -3.69 | -4.15 | -3.83 | 0.9 | 0.27 | 2.79  | -0.42 |
| A024361_01 | At2g31610     | 40S ribosomal protein S3, pu     | 0 | -0.49 | -0.82 | -0.82 | -1.51 | -1.86 | -1.82 | 0.8 | 0.55 | 2.66  | 0.60  |
| A024369_01 | At1g15970     | hypothetical protein; protein ic | 0 | -0.74 | -0.82 | -0.93 | -1.43 | -1.24 | NA    | 0.6 | 2.21 | NA    | NA    |
| A024372_01 | At3g27020     | expressed protein; protein id:   | 0 | 0.93  | 1.24  | 1.45  | 1.48  | 1.51  | 1.70  | 0.8 | 0.66 | -2.05 | 0.02  |

|            |           |                                    |   |       |       |       |       |       |       |     |      |       |       |
|------------|-----------|------------------------------------|---|-------|-------|-------|-------|-------|-------|-----|------|-------|-------|
| A024373_01 | At3g20083 | pseudogene, cytochrome P4f         | 0 | 1.56  | 2.09  | 2.13  | 2.26  | 2.04  | 2.57  | 1.3 | 0.06 | -1.97 | 0.36  |
| A024374_01 | At4g00630 | putative potassium/H+ antipo       | 0 | 0.45  | 0.58  | 0.62  | 0.68  | 0.35  | 1.21  | 1.0 | 0.26 | -1.53 | -0.05 |
| A024392_01 | At2g40510 | 40S ribosomal protein S26; pi      | 0 | -0.62 | -0.95 | -0.86 | -1.22 | -1.18 | -1.36 | 0.8 | 0.55 | 2.81  | -0.15 |
| A024394_01 | At3g19240 | dem-like protein; protein id: A    | 0 | 0.62  | 1.00  | 1.05  | 1.01  | 0.77  | 1.08  | 1.3 | 0.06 | -1.78 | 0.50  |
| A024396_01 | At1g55960 | membrane related protein CF        | 0 | 1.30  | 1.26  | 1.27  | 1.16  | 1.23  | 1.55  | 0.9 | 0.37 | -1.79 | 0.84  |
| A024398_01 | At1g53310 | phosphoenolpyruvate carboxy        | 0 | -0.88 | -0.92 | -0.93 | -1.20 | -1.41 | -0.87 | 1.0 | 0.26 | 2.52  | -0.65 |
| A024399_01 | At3g14270 | unknown protein; protein id: A     | 0 | 1.09  | 1.20  | 1.11  | 0.87  | 0.65  | 1.53  | 0.8 | 0.48 | -1.42 | 0.96  |
| A024410_01 | At3g60770 | ribosomal protein S13 -like; p     | 0 | -0.50 | -0.75 | -0.86 | -1.37 | -1.44 | -1.57 | 0.8 | 0.66 | 2.71  | 0.45  |
| A024421_01 | At5g02020 | putative protein; protein id: At   | 0 | 1.59  | 1.90  | 2.38  | 2.70  | 2.73  | 3.19  | 1.2 | 0.06 | -2.05 | -0.32 |
| A024430_01 | At3g42640 | plasma membrane H+-ATPas           | 0 | 0.36  | 0.71  | 0.94  | 0.76  | 0.85  | 1.29  | 0.6 | 2.21 | -1.87 | -0.38 |
| A024434_01 | At1g60610 | unknown protein; protein id: A     | 0 | 0.42  | 0.53  | 0.61  | 0.47  | 0.81  | 1.12  | 0.6 | 4.47 | -1.64 | -0.57 |
| A024435_01 | At5g54940 | translation initiation factor-like | 0 | 1.21  | 1.78  | 1.76  | 1.77  | 1.56  | 2.12  | 2.0 | 0.06 | -1.89 | 0.42  |
| A024442_01 | At2g24420 | expressed protein; protein id:     | 0 | 0.49  | 0.66  | 1.03  | 1.03  | 0.92  | 1.22  | 0.9 | 0.37 | -1.98 | -0.34 |
| A024443_01 | At2g25210 | 60S ribosomal protein L39; pr      | 0 | -0.70 | -0.96 | -0.85 | -1.34 | -1.74 | -1.81 | 1.6 | 0.06 | 2.75  | 0.25  |
| A024447_01 | At1g71880 | sucrose transport protein SUC      | 0 | 0.45  | 1.51  | 1.77  | 2.00  | 1.94  | 2.57  | 1.4 | 0.06 | -1.88 | -0.62 |
| A024453_01 | At1g03860 | putative prohibitin 2; protein ic  | 0 | -0.92 | -1.13 | -0.94 | -1.02 | -1.13 | -1.12 | 1.1 | 0.14 | 2.63  | -1.12 |
| A024454_01 | At3g22120 | unknown protein; protein id: A     | 0 | 0.42  | 0.02  | -1.05 | -3.35 | -4.35 | -3.32 | 2.2 | 0.06 | 2.23  | 1.29  |
| A024464_01 | At5g16570 | expressed protein; protein id:     | 0 | -0.37 | 0.81  | 1.87  | 2.95  | 2.76  | 3.09  | 1.3 | 0.06 | -1.67 | -1.47 |
| A024474_01 | At5g66510 | ferripyochelin-binding protein-    | 0 | -1.23 | -1.34 | -1.23 | -1.25 | -1.21 | -1.31 | 1.1 | 0.10 | 2.49  | -1.43 |
| A024478_01 | At5g36160 | putative protein; protein id: At   | 0 | 0.83  | 1.09  | 0.83  | 0.67  | 0.73  | 0.63  | 0.6 | 4.47 | -1.16 | 1.58  |
| A024481_01 | At4g17340 | membrane channel like prote        | 0 | 0.61  | 1.24  | 1.78  | 2.35  | 2.17  | 1.85  | 1.4 | 0.06 | -1.89 | -0.71 |
| A024484_01 | At1g68660 | expressed protein; protein id:     | 0 | 0.66  | 1.07  | 1.18  | 1.44  | 1.55  | 1.44  | 1.6 | 0.06 | -2.03 | -0.32 |
| A024485_01 | At1g22410 | 3-deoxy-D-arabino-heptuloso        | 0 | -1.33 | -1.14 | -0.64 | 0.66  | 0.36  | -0.32 | 0.7 | 2.21 | -0.14 | -2.24 |
| A024494_01 | xxxx      | b/t unknown protein; protein ic    | 0 | 0.76  | 0.87  | 0.98  | 0.88  | 0.58  | 1.23  | 0.7 | 0.96 | -1.67 | 0.62  |
| A024496_01 | At5g13720 | unknown protein; protein id: A     | 0 | 0.68  | 1.25  | 1.14  | 1.18  | 1.23  | 1.23  | 1.3 | 0.06 | -1.95 | 0.23  |
| A024501_01 | At4g32060 | putative protein; protein id: At   | 0 | 1.37  | 0.89  | 0.36  | -0.24 | 0.73  | -0.34 | 0.6 | 4.47 | 0.70  | 1.72  |
| A024502_01 | At2g41380 | putative embryo-abundant pro       | 0 | 0.72  | 1.91  | 2.65  | 3.13  | 3.33  | 3.90  | 0.6 | 4.47 | -1.95 | -0.90 |
| A024508_01 | At3g28940 | AIG2-like protein; protein id: A   | 0 | 0.24  | 0.82  | 1.01  | 1.46  | 1.41  | 1.37  | 1.2 | 0.06 | -1.90 | -0.89 |
| A024509_01 | At4g23430 | putative protein; protein id: At   | 0 | 0.49  | 1.08  | 1.20  | 1.53  | 1.72  | 1.50  | 1.3 | 0.06 | -1.97 | -0.60 |
| A024512_01 | At3g19450 | cinnamyl alcohol dehydrogen        | 0 | -0.35 | -0.05 | 0.56  | 1.93  | 1.36  | 0.69  | 0.6 | 4.47 | -1.15 | -1.48 |
| A024513_01 | At4g37550 | formamidase - like protein; pr     | 0 | 1.05  | 0.86  | 0.64  | 0.62  | 0.31  | 0.20  | 0.9 | 0.41 | -0.05 | 2.10  |
| A024514_01 | At4g35090 | catalase 2; protein id: At4g35     | 0 | 0.72  | 1.36  | 1.36  | 1.19  | 1.41  | 1.48  | 1.1 | 0.06 | -1.84 | 0.21  |
| A024518_01 | At2g25070 | protein phosphatase 2C (PP2        | 0 | 0.58  | 0.75  | 0.91  | 1.10  | 1.15  | 1.28  | 0.8 | 0.48 | -2.06 | -0.40 |
| A024521_01 | At1g17200 | expressed protein; protein id:     | 0 | -0.40 | -1.08 | -1.06 | -1.39 | -1.79 | -2.04 | 1.6 | 0.06 | 2.70  | 0.44  |
| A024527_01 | At1g75750 | expressed protein; protein id:     | 0 | 2.74  | 2.64  | 1.98  | 0.53  | 0.26  | 0.51  | 1.1 | 0.10 | 0.39  | 2.22  |
| A024531_01 | At1g36160 | hypothetical protein; protein ic   | 0 | -0.27 | -0.53 | -0.66 | -0.89 | -1.29 | -0.89 | 0.6 | 4.47 | 2.58  | 0.46  |
| A024532_01 | At1g63000 | expressed protein; protein id:     | 0 | -0.39 | -0.38 | -0.30 | -0.51 | -1.15 | -0.83 | 0.6 | 4.47 | 2.32  | 0.43  |
| A024538_01 | At3g06850 | branched chain alpha-keto ac       | 0 | 1.41  | 0.84  | 0.36  | 0.10  | 0.38  | 0.40  | 0.9 | 0.41 | 0.29  | 1.79  |
| A024544_01 | At5g02260 | expansin, putative; protein id:    | 0 | 0.83  | 1.26  | 1.27  | 1.63  | 1.07  | 1.16  | 0.9 | 0.27 | -1.70 | 0.47  |
| A024559_01 | At1g42550 | unknown protein; protein id: A     | 0 | 1.14  | 1.28  | 1.34  | 1.43  | 1.30  | 1.49  | 1.1 | 0.06 | -1.93 | 0.57  |
| A024560_01 | At5g61600 | DNA binding protein - like; pro    | 0 | 2.23  | 2.42  | 2.33  | 2.08  | 2.01  | 2.12  | 1.7 | 0.06 | -1.58 | 1.24  |
| A024562_01 | At1g43170 | ribosomal protein; protein id: .   | 0 | -0.47 | -0.89 | -0.99 | -1.57 | -1.71 | -1.60 | 0.9 | 0.31 | 2.71  | 0.45  |
| A024569_01 | At5g15650 | reversibly glycosylated polype     | 0 | -1.22 | -1.00 | -1.06 | -1.16 | -1.28 | -1.50 | 0.9 | 0.31 | 2.62  | -0.85 |
| A024578_01 | At3g17810 | dehydrogenase, putative; pro       | 0 | 1.52  | 1.40  | 1.43  | 1.31  | 1.26  | 2.17  | 0.9 | 0.31 | -1.70 | 0.59  |

|            |           |                                           |   |       |       |       |       |       |       |     |      |       |       |
|------------|-----------|-------------------------------------------|---|-------|-------|-------|-------|-------|-------|-----|------|-------|-------|
| A024580_01 | At5g11680 | unknown protein                           | 0 | 0.70  | 1.06  | 1.14  | 1.10  | 0.96  | 1.20  | 0.7 | 1.61 | -1.94 | 0.37  |
| A024581_01 | At3g16570 | expressed protein; protein id:            | 0 | 0.69  | 0.75  | 0.71  | 0.59  | 0.23  | -0.05 | 0.8 | 0.81 | 0.10  | 1.64  |
| A024585_01 | At3g52590 | ubiquitin extension protein 1 (           | 0 | -0.96 | -1.13 | -1.16 | -1.59 | -1.65 | -1.68 | 1.0 | 0.26 | 2.80  | -0.19 |
| A024586_01 | At1g19920 | sulfate adenylyltransferase; p            | 0 | -0.32 | -0.62 | -0.77 | -1.36 | -1.62 | -1.64 | 1.2 | 0.06 | 2.60  | 0.76  |
| A024599_01 | At2g25080 | glutathione peroxidase, putati            | 0 | 1.61  | 2.00  | 2.04  | 2.00  | 1.57  | 1.28  | 1.0 | 0.14 | -1.35 | 1.18  |
| A024610_01 | At4g19840 | lectin like protein; protein id: <i>A</i> | 0 | 1.55  | 1.92  | 2.20  | 2.60  | 2.23  | 2.83  | 1.2 | 0.06 | -2.03 | -0.01 |
| A024611_01 | At4g31550 | putative putative DNA-binding             | 0 | 0.55  | 1.11  | 1.16  | 1.33  | 0.82  | 1.37  | 0.8 | 0.96 | -1.75 | 0.12  |
| A024612_01 | At5g53160 | putative protein; protein id: At          | 0 | 1.00  | 1.25  | 1.56  | 1.73  | 1.62  | 1.63  | 0.8 | 0.81 | -2.02 | 0.01  |
| A024622_01 | At2g18960 | plasma membrane proton AT                 | 0 | 0.61  | 0.90  | 0.98  | 0.74  | 0.80  | 1.41  | 0.7 | 1.20 | -1.77 | 0.15  |
| A024627_01 | At1g03130 | putative photosystem I reacti             | 0 | 0.65  | 0.85  | 0.85  | 1.14  | 0.93  | 0.90  | 0.9 | 0.37 | -1.93 | 0.23  |
| A024630_01 | At1g18540 | 60S ribosomal protein L6, put             | 0 | -0.94 | -1.09 | -1.06 | -1.64 | -1.95 | -1.80 | 0.9 | 0.37 | 2.75  | 0.08  |
| A024633_01 | At1g66180 | expressed protein; protein id:            | 0 | -0.08 | -0.34 | -0.97 | -1.75 | -2.47 | -2.72 | 1.3 | 0.06 | 2.38  | 1.13  |
| A024635_01 | At1g79560 | FtsH protease, putative; prote            | 0 | -1.28 | -1.31 | -1.40 | -1.49 | -1.69 | -1.99 | 0.8 | 0.81 | 2.76  | -0.59 |
| A024636_01 | At1g23310 | putative alanine aminotransfe             | 0 | 1.36  | 1.66  | 1.71  | 1.67  | 1.57  | 1.70  | 0.8 | 0.81 | -1.85 | 0.73  |
| A024637_01 | At1g48830 | 40S ribosomal protein S7 hor              | 0 | -0.73 | -0.97 | -0.91 | -1.38 | -1.61 | -1.72 | 1.5 | 0.06 | 2.77  | 0.16  |
| A024642_01 | At2g01420 | PIN4; putative auxin transpor             | 0 | 1.03  | 1.40  | 1.49  | 1.39  | 1.11  | 1.24  | 0.8 | 0.81 | -1.67 | 0.87  |
| A024644_01 | At3g49910 | 60S RIBOSOMAL PROTEIN                     | 0 | -0.54 | -0.64 | -0.72 | -1.36 | -1.64 | -1.73 | 0.7 | 1.20 | 2.57  | 0.63  |
| A024645_01 | At4g35860 | putative GTP-binding protein              | 0 | 0.36  | 0.40  | 0.54  | 0.68  | 0.71  | 1.01  | 0.9 | 0.37 | -1.89 | -0.74 |
| A024647_01 | At3g28860 | multidrug resistance P-glycop             | 0 | -0.92 | -1.61 | -1.75 | -2.60 | -2.76 | -2.37 | 0.9 | 0.41 | 2.73  | 0.23  |
| A024649_01 | At1g29670 | lipase/hydrolase, putative; prc           | 0 | 0.06  | 0.31  | -0.46 | -0.63 | -1.29 | -1.89 | 1.0 | 0.20 | 1.96  | 1.30  |
| A024652_01 | At1g27450 | adenine phosphoribosyltransf              | 0 | -1.10 | -1.18 | -0.98 | -1.25 | -1.40 | -1.34 | 1.0 | 0.16 | 2.70  | -0.90 |
| A024653_01 | At5g59700 | receptor-like protein kinase pi           | 0 | 0.00  | 0.51  | 1.02  | 1.06  | 1.49  | 1.52  | 1.2 | 0.06 | -1.76 | -1.34 |
| A024661_01 | At5g45710 | heat shock transcription facto            | 0 | 0.46  | 0.54  | 0.70  | 0.90  | 1.06  | 0.99  | 0.8 | 0.81 | -2.00 | -0.61 |
| A024663_01 | At1g14370 | protein kinase; protein id: At1           | 0 | 1.63  | 2.44  | 2.51  | 2.61  | 2.74  | 2.88  | 1.4 | 0.06 | -2.01 | 0.16  |
| A024664_01 | At3g10450 | putative glucose acyltransfera            | 0 | 1.28  | 1.76  | 1.92  | 2.12  | 2.34  | 2.60  | 1.6 | 0.06 | -2.07 | -0.18 |
| A024665_01 | At5g58800 | quinone reductase family; pro             | 0 | 1.08  | 0.90  | 0.83  | 0.99  | 1.18  | 0.92  | 1.0 | 0.18 | -1.62 | 0.70  |
| A024671_01 | At3g13940 | unknown protein; protein id: <i>A</i>     | 0 | -0.91 | -0.93 | -0.61 | -1.04 | -0.68 | -0.89 | 0.7 | 1.20 | 2.29  | -1.39 |
| A024673_01 | At3g59760 | cysteine synthase; protein id:            | 0 | -1.87 | -2.14 | -1.78 | -1.81 | -1.73 | -1.68 | 1.2 | 0.06 | 2.28  | -1.70 |
| A024676_01 | At4g04620 | AtAPG8b; putative symbiosis-              | 0 | 1.11  | 1.08  | 1.06  | 1.14  | 1.38  | 1.48  | 1.0 | 0.20 | -1.95 | 0.34  |
| A024687_01 | At1g52190 | peptide transporter, putative;            | 0 | -0.34 | -0.22 | -0.52 | -0.76 | -2.15 | -2.50 | 1.3 | 0.06 | 2.15  | 0.95  |
| A024724_01 | At5g60140 | putative protein; protein id: At          | 0 | -0.69 | -1.22 | -1.05 | -1.26 | -1.22 | -1.17 | 0.8 | 0.55 | 2.66  | -0.70 |
| A024725_01 | At5g50150 | putative protein; protein id: At          | 0 | -0.47 | -0.86 | -0.96 | -1.49 | -2.25 | -2.25 | 1.7 | 0.06 | 2.60  | 0.70  |
| A024785_01 | At1g48610 | regulatory protein HAL3B; prc             | 0 | -1.50 | -1.71 | -1.73 | -1.85 | -2.04 | -2.11 | 1.0 | 0.16 | 2.75  | -0.78 |
| A024791_01 | At4g26520 | fructose-bisphosphate aldola              | 0 | 0.56  | 0.30  | 0.12  | 0.26  | -0.21 | -1.13 | 0.9 | 0.48 | 1.42  | 1.28  |
| A024822_01 | At3g46520 | A.t. DNA chromosome 3, BA(C               | 0 | 0.32  | 0.63  | 0.90  | 0.90  | 1.23  | 1.31  | 1.0 | 0.20 | -1.95 | -0.88 |
| A024856_01 | At1g52030 | myrosinase binding protein, p             | 0 | -3.03 | -3.83 | -2.94 | NA    | -4.00 | -3.83 | 1.0 | 0.16 | NA    | NA    |
| A024862_01 | At5g09690 | putative protein; protein id: At          | 0 | 0.51  | 0.69  | 0.95  | 1.07  | 1.16  | 1.41  | 0.9 | 0.37 | -1.98 | -0.70 |
| A024863_01 | At5g56000 | heat shock protein (emb CAA               | 0 | -0.86 | -0.59 | -0.63 | -1.48 | -1.72 | -1.09 | 1.0 | 0.20 | 2.38  | 0.19  |
| A024881_01 | At4g35010 | glycosyl hydrolase family 35 (            | 0 | -0.05 | 0.32  | 0.66  | 0.36  | 0.72  | 1.19  | 0.6 | 4.47 | -1.53 | -1.16 |
| A024890_01 | At4g23180 | serine/threonine kinase -like p           | 0 | 0.69  | 1.53  | 1.31  | 1.45  | 1.28  | 1.10  | 1.0 | 0.16 | -1.61 | 0.49  |
| A024913_01 | At4g32390 | putative protein; protein id: At          | 0 | -0.79 | -0.68 | -0.70 | -1.02 | -1.18 | -1.17 | 1.1 | 0.06 | 2.66  | -0.18 |
| A024978_01 | At4g01560 | expressed protein; protein id:            | 0 | -0.61 | -0.75 | -0.68 | -1.12 | -1.22 | -1.12 | 1.2 | 0.06 | 2.74  | 0.01  |
| A025036_01 | At3g62740 | glycosyl hydrolase family 1; p            | 0 | 1.20  | 1.38  | 1.33  | 1.15  | 1.17  | 1.50  | 0.7 | 1.20 | -1.76 | 0.92  |
| A025058_01 | At5g02490 | DnaK-type molecular chaperc               | 0 | -0.44 | -0.16 | -0.22 | -1.05 | -1.12 | -0.68 | 0.8 | 0.48 | 2.16  | 0.60  |



|            |               |                                                                 |   |       |       |       |       |       |       |     |      |       |       |
|------------|---------------|-----------------------------------------------------------------|---|-------|-------|-------|-------|-------|-------|-----|------|-------|-------|
| A025060_01 | At3g44300     | nitrilase 2; protein id: At3g44300                              | 0 | 2.89  | 3.39  | 3.76  | 3.44  | 4.19  | 5.35  | 1.6 | 0.06 | -1.98 | 0.00  |
| A025061_01 | At3g28100     | unknown protein; protein id: A025061_01                         | 0 | 1.58  | 2.66  | 3.18  | 3.64  | 3.85  | 4.40  | 2.4 | 0.06 | -2.05 | -0.50 |
| A025074_01 | At3g17410     | putative protein kinase; protein id: A025074_01                 | 0 | 0.32  | 0.65  | 0.72  | 0.91  | 1.03  | 0.96  | 1.2 | 0.06 | -1.99 | -0.58 |
| A025085_01 | At5g11230     | putative protein; protein id: At5g11230                         | 0 | -0.79 | -0.74 | -0.62 | -0.88 | -1.80 | -1.46 | 1.0 | 0.14 | 2.51  | 0.15  |
| A025101_01 | At5g16340     | AMP-binding protein; protein id: A025101_01                     | 0 | 1.03  | 0.97  | 0.78  | 0.71  | 0.48  | 0.34  | 0.9 | 0.31 | -0.43 | 2.01  |
| A025130_01 | At5g37600     | glutamate--ammonia ligase; protein id: A025130_01               | 0 | -0.19 | -0.16 | 0.09  | 0.22  | 0.17  | 1.08  | 0.8 | 0.81 | -0.95 | -1.57 |
| A025190_01 | At5g38540     | myrosinase binding protein-like; protein id: A025190_01         | 0 | -2.50 | -3.17 | -2.71 | -4.27 | -4.08 | -3.66 | 1.0 | 0.16 | 2.74  | -0.47 |
| A025268_01 | At1g08930     | zinc finger protein ATZF1, putative; protein id: A025268_01     | 0 | 1.04  | 1.99  | 2.03  | 2.35  | 2.24  | 2.28  | 1.0 | 0.20 | -1.93 | -0.04 |
| A025274_01 | At3g51430     | strictosidine synthase-related protein; protein id: A025274_01  | 0 | 1.54  | 1.67  | 1.49  | 1.51  | 1.60  | 1.81  | 1.0 | 0.14 | -1.83 | 0.80  |
| A025313_01 | At1g76680     | 12-oxophytodienoate reductase 1; protein id: A025313_01         | 0 | -0.08 | 0.99  | 1.51  | 1.46  | 1.64  | 1.76  | 0.7 | 0.96 | -1.74 | -1.00 |
| A025368_01 | At1g52030     | myrosinase binding protein, putative; protein id: A025368_01    | 0 | -3.17 | -4.16 | -3.24 | -5.40 | -5.33 | -4.62 | 1.2 | 0.06 | 2.73  | -0.47 |
| A025372_01 | At5g35450     | disease resistance protein (CIP1); protein id: A025372_01       | 0 | 1.03  | 1.58  | 1.83  | 1.91  | 1.84  | 2.15  | 1.3 | 0.06 | -2.03 | -0.06 |
| A025393_01 | At2g44560     | glycosyl hydrolase family 9; protein id: A025393_01             | 0 | -0.49 | -0.03 | 0.51  | 0.45  | 0.88  | 1.10  | 1.1 | 0.14 | -1.31 | -1.81 |
| A025394_01 | not annotated | Chr4 C/8472579-8472648                                          | 0 | 0.94  | 1.13  | 0.98  | 0.81  | 0.60  | 1.41  | 0.8 | 0.81 | -1.44 | 0.92  |
| A025408_01 | At2g22920     | putative serine carboxypeptidase; protein id: A025408_01        | 0 | 1.35  | 1.68  | 1.84  | 2.07  | 1.84  | 1.94  | 0.9 | 0.31 | -1.98 | 0.32  |
| A025479_01 | At2g42580     | expressed protein; protein id: A025479_01                       | 0 | -0.33 | -0.46 | -0.82 | -1.07 | -1.14 | -1.30 | 0.6 | 4.47 | 2.68  | 0.61  |
| A025502_01 | At1g64760     | glycosyl hydrolase family 17; protein id: A025502_01            | 0 | -1.13 | -1.00 | -0.89 | -1.24 | -1.61 | -2.08 | 0.9 | 0.41 | 2.65  | -0.16 |
| A025542_01 | At1g29310     | flower pigmentation protein A; protein id: A025542_01           | 0 | -0.97 | -0.94 | -1.03 | -1.24 | -1.37 | -1.24 | 0.8 | 0.81 | 2.74  | -0.62 |
| A025585_01 | At1g63370     | flavin-binding monooxygenase; protein id: A025585_01            | 0 | 1.23  | 1.04  | 0.95  | 0.69  | 0.90  | 1.13  | 0.9 | 0.37 | -1.34 | 1.34  |
| A025588_01 | At1g28610     | lipase, putative; protein id: A025588_01                        | 0 | 0.65  | 1.58  | 1.93  | 2.15  | 2.22  | 2.33  | 1.4 | 0.06 | -1.99 | -0.59 |
| A025590_01 | xxxx          | b/t polyprotein, putative; protein id: A025590_01               | 0 | -0.07 | -0.66 | -0.77 | -1.00 | -0.80 | -0.83 | 0.9 | 0.37 | 2.40  | 0.16  |
| A025600_01 | At1g08210     | expressed protein; protein id: A025600_01                       | 0 | -0.27 | -0.72 | -0.68 | -0.87 | -0.47 | -0.92 | 0.8 | 0.66 | 2.28  | -0.45 |
| A025645_01 | At3g11250     | 60S acidic ribosomal protein, L16; protein id: A025645_01       | 0 | -0.89 | -1.02 | -0.96 | -1.34 | -1.32 | -1.40 | 1.1 | 0.10 | 2.80  | -0.43 |
| A025683_01 | At1g68740     | putative receptor protein; protein id: A025683_01               | 0 | -1.49 | -1.38 | -0.49 | 0.22  | 0.48  | 1.06  | 0.8 | 0.96 | -0.49 | -2.40 |
| A025718_01 | At4g31800     | WRKY family transcription factor; protein id: A025718_01        | 0 | 0.58  | 1.01  | 0.63  | 0.26  | -0.09 | 0.21  | 0.6 | 4.47 | 0.24  | 1.80  |
| A025727_01 | At4g37560     | formamidase - like protein; protein id: A025727_01              | 0 | 1.65  | 1.86  | 2.08  | 2.55  | 2.77  | 2.98  | 0.8 | 0.81 | -2.06 | -0.22 |
| A025728_01 | At1g04900     | expressed protein; protein id: A025728_01                       | 0 | -1.37 | -1.56 | -1.46 | -1.27 | -1.51 | -1.93 | 0.7 | 1.20 | 2.60  | -1.05 |
| A025730_01 | At5g18620     | chromatin remodelling complex subunit; protein id: A025730_01   | 0 | -1.07 | -1.03 | -0.80 | -1.00 | -0.83 | -0.86 | 0.9 | 0.41 | 2.22  | -1.73 |
| A025739_01 | At1g73310     | putative serine carboxypeptidase; protein id: A025739_01        | 0 | 1.73  | 2.20  | 2.47  | 2.48  | 2.52  | 3.04  | 1.5 | 0.06 | -2.04 | 0.09  |
| A025759_01 | At2g22980     | putative serine carboxypeptidase; protein id: A025759_01        | 0 | 2.32  | 2.15  | 2.30  | 2.00  | 1.85  | 1.10  | 0.7 | 1.61 | -1.00 | 1.58  |
| A025768_01 | At2g33590     | putative cinnamoyl-CoA reductase; protein id: A025768_01        | 0 | 0.83  | 1.06  | 1.09  | 0.93  | 1.12  | 1.68  | 1.5 | 0.06 | -1.89 | 0.10  |
| A025770_01 | At3g14690     | cytochrome P450, putative; protein id: A025770_01               | 0 | 0.69  | 0.98  | 1.12  | 1.24  | 1.56  | 1.39  | 1.3 | 0.06 | -2.03 | -0.33 |
| A025772_01 | At4g26530     | fructose-bisphosphate aldolase; protein id: A025772_01          | 0 | 1.21  | 0.99  | 0.75  | 1.13  | 0.44  | -1.09 | 0.9 | 0.27 | 0.67  | 1.33  |
| A025777_01 | At4g34030     | putative protein; protein id: A025777_01                        | 0 | 1.65  | 1.44  | 1.18  | 0.85  | 1.85  | 0.92  | 0.7 | 1.20 | -1.04 | 1.14  |
| A025787_01 | At3g05165     | expressed protein; protein id: A025787_01                       | 0 | 0.80  | 1.12  | 1.56  | 1.58  | 1.67  | 2.40  | 1.4 | 0.06 | -1.97 | -0.57 |
| A025788_01 | At3g14415     | glycolate oxidase; protein id: A025788_01                       | 0 | 0.86  | 1.29  | 1.27  | 1.40  | 1.45  | 1.51  | 1.2 | 0.06 | -2.01 | 0.15  |
| A025795_01 | At3g52180     | putative protein; protein id: A025795_01                        | 0 | -1.33 | -1.35 | -1.20 | -0.44 | -0.47 | -1.24 | 0.6 | 2.21 | 1.38  | -2.06 |
| A025798_01 | At1g12780     | uridine diphosphate glucose 4-epimerase; protein id: A025798_01 | 0 | 2.43  | 2.12  | 2.04  | 1.93  | 1.58  | 1.37  | 1.0 | 0.20 | -1.04 | 1.71  |
| A025803_01 | At5g07340     | calnexin homolog; protein id: A025803_01                        | 0 | -0.68 | -0.71 | -0.75 | -0.83 | -0.90 | -1.04 | 0.6 | 4.47 | 2.77  | -0.63 |
| A025807_01 | At5g01220     | putative protein; protein id: A025807_01                        | 0 | -0.80 | -0.88 | -1.02 | -0.55 | -0.46 | -1.18 | 0.8 | 0.66 | 2.06  | -1.35 |
| A025844_01 | At1g15910     | transcriptional regulator, putative; protein id: A025844_01     | 0 | -0.11 | -0.83 | -1.00 | -0.92 | -1.58 | -1.55 | 1.0 | 0.20 | 2.54  | 0.56  |
| A025847_01 | At5g07440     | glutamate dehydrogenase 2; protein id: A025847_01               | 0 | 1.58  | 1.44  | 0.91  | 0.35  | -0.03 | 0.13  | 0.7 | 1.20 | 0.56  | 2.23  |
| A025869_01 | At2g47030     | pectinesterase family; protein id: A025869_01                   | 0 | 0.27  | 0.63  | 0.94  | 0.91  | 0.95  | 1.73  | 0.9 | 0.27 | -1.78 | -0.87 |
| A025870_01 | At4g14960     | tubulin alpha-6 chain (TUA6); protein id: A025870_01            | 0 | -0.87 | -0.58 | -0.66 | -0.72 | -1.06 | -1.06 | 0.7 | 0.96 | 2.38  | -0.43 |

|            |           |                                  |   |       |       |       |       |       |       |     |      |       |       |
|------------|-----------|----------------------------------|---|-------|-------|-------|-------|-------|-------|-----|------|-------|-------|
| A025900_01 | At1g71890 | putative sucrose transport pro   | 0 | -0.31 | -0.49 | -0.59 | -1.08 | -1.54 | -1.27 | 1.0 | 0.16 | 2.52  | 0.76  |
| A025909_01 | At2g26740 | epoxide hydrolase (ATsEH); p     | 0 | 0.83  | 1.08  | 0.97  | 0.81  | 0.97  | 1.19  | 0.7 | 1.61 | -1.79 | 0.73  |
| A025911_01 | At4g23560 | glycosyl hydrolase family 9; p   | 0 | -0.90 | -2.07 | -0.92 | -2.58 | -1.38 | 1.09  | 0.8 | 0.55 | 0.79  | -1.17 |
| A025922_01 | At4g27830 | glycosyl hydrolase family 1; p   | 0 | 0.47  | 1.03  | 1.07  | 0.90  | 1.08  | 1.56  | 1.1 | 0.10 | -1.90 | -0.25 |
| A025924_01 | At4g30470 | cinnamoyl-CoA reductase - lil    | 0 | 1.65  | 1.63  | 1.80  | 1.72  | 1.78  | 2.07  | 1.0 | 0.26 | -1.91 | 0.63  |
| A025937_01 | At3g14650 | cytochrome P450, putative; p     | 0 | 0.14  | 0.47  | 0.81  | 0.90  | 1.14  | 0.94  | 0.7 | 1.20 | -1.84 | -1.10 |
| A025944_01 | At5g43060 | cysteine protease component      | 0 | 1.28  | 0.71  | 0.39  | NA    | 0.71  | 0.76  | 0.8 | 0.55 | NA    | NA    |
| A025947_01 | At1g72900 | disease resistance protein (Tl   | 0 | 1.48  | 2.11  | 1.92  | 2.35  | 2.24  | 2.04  | 0.7 | 1.20 | -1.91 | 0.40  |
| A025949_01 | At3g14420 | glycolate oxidase, putative; pr  | 0 | 0.72  | 1.02  | 0.98  | 0.94  | 1.12  | 1.00  | 0.8 | 0.96 | -1.89 | 0.47  |
| A025958_01 | At1g50010 | tubulin alpha-2/alpha-4 chain,   | 0 | -1.31 | -1.06 | -0.99 | -0.87 | -1.23 | -1.19 | 0.8 | 0.81 | 2.25  | -1.35 |
| A025961_01 | At4g34180 | putative protein; protein id: At | 0 | 0.59  | 0.93  | 1.06  | 1.36  | 1.47  | 1.77  | 1.4 | 0.06 | -2.00 | -0.69 |
| A025969_01 | At3g09630 | putative 60S ribosomal protei    | 0 | -0.61 | -1.02 | -0.98 | -1.52 | -1.63 | -1.62 | 0.9 | 0.31 | 2.78  | 0.20  |
| A025971_01 | At1g08510 | acyl-(acyl carrier protein) thio | 0 | 1.00  | 0.92  | 0.88  | 0.51  | -0.10 | 0.50  | 0.6 | 2.21 | 0.03  | 1.90  |
| A025984_01 | At1g20010 | beta tubulin 1, putative; protei | 0 | -1.28 | -1.64 | -1.43 | -1.13 | -1.51 | -2.44 | 0.9 | 0.37 | 2.47  | -0.77 |
| A025990_01 | At5g56030 | heat shock protein 81-2 (HSP     | 0 | -1.00 | -0.81 | -0.79 | -1.61 | -1.58 | -1.22 | 1.0 | 0.16 | 2.52  | -0.13 |
| A025995_01 | At2g01670 | expressed protein; protein id:   | 0 | 1.04  | 1.32  | 1.32  | 1.01  | 1.09  | 0.93  | 1.1 | 0.10 | -1.45 | 1.25  |
| A025997_01 | At3g26180 | cytochrome p450 family; prote    | 0 | 1.58  | 1.66  | 1.61  | 1.11  | 1.17  | 1.48  | 0.6 | 4.47 | -1.33 | 1.47  |
| A025998_01 | At1g02300 | cathepsin B-like cysteine prot   | 0 | 1.65  | 1.61  | 1.68  | 1.49  | 1.19  | 1.66  | 0.6 | 2.21 | -1.55 | 1.24  |
| A026002_01 | At5g07440 | glutamate dehydrogenase 2;       | 0 | 1.63  | 1.34  | 0.89  | 0.31  | 0.01  | 0.01  | 0.8 | 0.81 | 0.65  | 2.23  |
| A026004_01 | At5g48620 | disease resistance protein (C    | 0 | 1.03  | 1.67  | 1.81  | 1.88  | 1.63  | 2.03  | 1.3 | 0.06 | -1.95 | 0.16  |
| A026082_01 | At3g03270 | expressed protein; protein id:   | 0 | 0.90  | 0.98  | 0.89  | 1.10  | 1.53  | 1.68  | 1.3 | 0.06 | -1.96 | -0.27 |
| A000178_01 | At1g12520 | copper/zinc superoxide dismut    | 0 | -0.31 | -1.07 | -1.13 | -1.80 | -1.67 | NA    | 0.7 | 0.96 | NA    | NA    |
| A000790_01 | At1g68600 | expressed protein; protein id:   | 0 | 0.22  | 0.05  | 0.74  | 1.71  | 1.81  | 2.03  | 0.7 | 1.20 | -1.62 | -1.50 |
| A000902_01 | At1g58200 | unknown protein; protein id: A   | 0 | 0.77  | 1.01  | 0.71  | 0.82  | 0.75  | 0.79  | 0.7 | 1.61 | -1.53 | 1.20  |
| A001151_01 | At1g29700 | expressed protein; protein id:   | 0 | 0.68  | 0.76  | 0.78  | 1.29  | 1.38  | 1.19  | 0.9 | 0.26 | -2.00 | -0.37 |
| A001600_01 | At1g31940 | expressed protein; protein id:   | 0 | 0.38  | 0.73  | 0.81  | 1.02  | 1.06  | 1.12  | 0.8 | 0.66 | -1.99 | -0.47 |
| A002404_01 | At1g28280 | expressed protein; protein id:   | 0 | 0.63  | 0.84  | 0.86  | 1.29  | 1.32  | 1.34  | 0.8 | 0.66 | -2.05 | -0.43 |
| A003140_01 | At1g56260 | hypothetical protein; protein ic | 0 | 0.13  | 0.84  | 0.95  | 1.39  | 1.61  | 1.45  | 1.3 | 0.06 | -1.86 | -1.05 |
| A003526_01 | At1g69610 | unknown protein; protein id: A   | 0 | 0.54  | 1.66  | 2.36  | 3.01  | 3.00  | 3.78  | 0.6 | 4.47 | -1.91 | -1.03 |
| A003659_01 | At1g62640 | 3-ketoacyl-acyl carrier protein  | 0 | -0.61 | -0.84 | -0.79 | -0.79 | -1.02 | -0.87 | 0.7 | 1.61 | 2.68  | -0.74 |
| A003859_01 | At1g11850 | expressed protein; protein id:   | 0 | -0.60 | -1.26 | -0.92 | -1.57 | -2.22 | -1.96 | 0.7 | 2.21 | 2.71  | 0.30  |
| A004129_01 | At1g33475 | similar to RRM-containing pro    | 0 | -0.70 | -0.92 | -1.13 | -1.18 | -1.82 | -1.60 | 0.6 | 4.47 | 2.71  | 0.14  |
| A005189_01 | At1g76405 | auxin-regulated protein; prote   | 0 | -0.71 | -1.27 | -0.87 | -1.09 | -1.43 | -2.05 | 0.7 | 1.61 | 2.65  | -0.17 |
| A005392_01 | At1g17950 | myb family trnscription factor;  | 0 | NA    | 1.21  | 2.64  | 4.42  | 4.58  | 4.24  | 0.8 | 0.81 | NA    | NA    |
| A005682_01 | At1g53030 | cytochrome C oxidase assem       | 0 | 0.56  | 0.68  | 0.74  | 1.17  | 1.31  | 1.31  | 1.0 | 0.16 | -1.96 | -0.70 |
| A006166_01 | At2g46650 | putative cytochrome b5; prote    | 0 | -0.88 | 0.20  | 1.20  | 1.24  | 1.60  | 3.26  | 0.8 | 0.81 | -1.36 | -1.64 |
| A006299_01 | At2g35060 | putative potassium transporte    | 0 | 0.17  | 0.56  | 1.01  | 0.99  | 1.51  | 1.40  | 0.7 | 2.21 | -1.81 | -1.09 |
| A006359_01 | At2g36330 | hypothetical protein; protein ic | 0 | 0.88  | 0.73  | 0.71  | 1.03  | 1.06  | 1.04  | 0.7 | 2.21 | -1.88 | 0.22  |
| A006638_01 | At2g31350 | glyoxalase II, putative (hydrox  | 0 | 0.73  | 0.57  | 0.88  | 1.14  | 1.34  | 1.33  | 0.9 | 0.26 | -1.96 | -0.55 |
| A006661_01 | At2g16890 | putative glucosyltransferase;    | 0 | 1.00  | 0.80  | 0.65  | 0.62  | 0.57  | 0.26  | 0.8 | 0.96 | -0.42 | 1.91  |
| A008284_01 | At2g29670 | expressed protein; protein id:   | 0 | -0.64 | 0.00  | 0.29  | 1.28  | 1.26  | 0.76  | 0.8 | 0.48 | -1.22 | -1.83 |
| A008620_01 | At2g17880 | putative DnaJ protein; protein   | 0 | -1.07 | -1.01 | -1.16 | -1.06 | -1.46 | NA    | 0.7 | 2.21 | NA    | NA    |
| A008712_01 | At2g31945 | expressed protein; protein id:   | 0 | 3.19  | 2.87  | 2.33  | 1.61  | 1.88  | 2.74  | 0.7 | 1.20 | -1.06 | 1.53  |
| A009259_01 | At3g44450 | putative protein; protein id: At | 0 | -0.51 | 0.87  | 1.52  | 2.73  | 2.70  | 2.39  | 0.9 | 0.27 | -1.61 | -1.47 |

|            |           |                                                |   |       |       |       |       |       |       |     |      |       |       |
|------------|-----------|------------------------------------------------|---|-------|-------|-------|-------|-------|-------|-----|------|-------|-------|
| A010702_01 | At3g16050 | putative ethylene-inducible pr                 | 0 | -1.14 | -1.30 | -1.07 | -1.73 | -2.07 | -1.91 | 1.1 | 0.10 | 2.77  | -0.16 |
| A010770_01 | At3g10420 | expressed protein; protein id:                 | 0 | 0.94  | 1.07  | 1.03  | 0.72  | 0.55  | 1.70  | 0.8 | 0.55 | -1.35 | 0.60  |
| A010967_01 | At3g62960 | glutaredoxin -like protein; proi               | 0 | NA    | 1.30  | 2.97  | 3.35  | 3.54  | 4.86  | 0.7 | 1.20 | NA    | NA    |
| A011702_01 | At3g21240 | putative 4-coumarate:CoA lig;                  | 0 | NA    | 0.50  | 1.21  | 2.71  | 2.51  | 1.97  | 0.6 | 4.47 | NA    | NA    |
| A014327_01 | At4g25390 | receptor kinase-like protein; p                | 0 | 1.93  | 2.08  | 2.00  | 2.10  | 2.49  | 2.60  | 1.0 | 0.18 | -1.97 | 0.40  |
| A015419_01 | At4g01900 | P II nitrogen sensing protein (                | 0 | -1.31 | -1.66 | -1.13 | -1.68 | -2.42 | NA    | 0.8 | 0.81 | NA    | NA    |
| A015597_01 | At5g22750 | putative protein; protein id: At               | 0 | -0.89 | -1.05 | -1.11 | -1.30 | -1.24 | NA    | 0.8 | 0.66 | NA    | NA    |
| A016171_01 | At5g62150 | putative protein; protein id: At               | 0 | NA    | 0.73  | 1.71  | 2.96  | 2.85  | 2.42  | 0.6 | 2.21 | NA    | NA    |
| A016737_01 | At5g11630 | putative protein; protein id: At               | 0 | -0.60 | -0.77 | -0.71 | -1.17 | -1.29 | -1.43 | 1.0 | 0.20 | 2.76  | 0.18  |
| A016743_01 | At5g57440 | GS1-like protein; protein id: A                | 0 | -0.71 | -1.11 | -0.84 | -0.77 | -1.15 | -1.95 | 0.6 | 4.47 | 2.48  | -0.26 |
| A016766_01 | At5g14510 | putative protein; protein id: At               | 0 | -0.29 | 0.30  | 0.98  | 2.09  | 1.78  | NA    | 1.1 | 0.14 | NA    | NA    |
| A016921_01 | At5g03560 | putative protein; protein id: At               | 0 | 0.90  | 0.95  | 1.14  | 1.25  | 1.66  | 1.59  | 1.1 | 0.10 | -2.02 | -0.30 |
| A016963_01 | At5g05140 | putative protein; protein id: At               | 0 | 1.05  | 1.11  | 0.81  | 0.97  | 0.89  | 0.86  | 1.0 | 0.18 | -1.43 | 1.38  |
| A017319_01 | At5g35970 | DNA helicase-like; protein id:                 | 0 | 1.09  | 1.84  | 1.90  | 1.92  | 2.04  | 2.66  | 1.3 | 0.06 | -2.02 | -0.14 |
| A017675_01 | At5g42060 | putative protein; protein id: At               | 0 | -0.57 | -0.99 | -0.65 | -1.34 | -1.59 | -1.38 | 0.9 | 0.41 | 2.70  | 0.18  |
| A017696_01 | At5g58787 | expressed protein; protein id:                 | 0 | 0.63  | 0.78  | 1.48  | 1.73  | 1.81  | 1.61  | 0.8 | 0.48 | -1.93 | -0.81 |
| A018180_01 | At5g02050 | putative protein; protein id: At               | 0 | -1.90 | -1.71 | -1.53 | -2.64 | -2.71 | NA    | 0.8 | 0.48 | NA    | NA    |
| A019148_01 | At5g15860 | carboxylesterase-like protein;                 | 0 | 0.93  | 1.39  | 1.29  | 1.47  | 1.60  | 1.36  | 1.1 | 0.14 | -1.95 | 0.26  |
| A019735_01 | At5g62070 | putative protein; protein id: At               | 0 | -0.65 | -0.38 | -0.72 | -0.74 | -0.79 | -1.37 | 0.6 | 4.47 | 2.46  | 0.08  |
| A019790_01 | At1g16400 | cytochrome p450 family; prot                   | 0 | NA    | 0.49  | 2.03  | 3.04  | 3.22  | 4.62  | 0.8 | 0.66 | NA    | NA    |
| A019860_01 | At2g27820 | putative chorismate mutase/p                   | 0 | -0.93 | -0.96 | -0.81 | -0.10 | -0.38 | -1.07 | 0.6 | 4.47 | 1.36  | -1.71 |
| A019961_01 | At1g78200 | protein phosphatase 2C (PP2                    | 0 | 0.45  | 0.67  | 0.88  | 1.01  | 1.03  | 1.13  | 0.8 | 0.81 | -2.05 | -0.51 |
| A020052_01 | At4g16985 | expressed protein; protein id:                 | 0 | -0.26 | -0.55 | -0.80 | -1.14 | -1.34 | -1.09 | 0.6 | 4.47 | 2.62  | 0.58  |
| A020252_01 | At4g29950 | putative protein; protein id: At               | 0 | 0.87  | 1.01  | 0.64  | 0.54  | 0.57  | 0.68  | 0.9 | 0.26 | -1.01 | 1.76  |
| A020391_01 | At4g32570 | putative protein; protein id: At               | 0 | -0.98 | -1.15 | -1.02 | -1.16 | -0.88 | -1.14 | 1.0 | 0.26 | 2.49  | -1.35 |
| A020698_01 | At1g73500 | MAP kinase, putative; protein                  | 0 | 0.50  | 0.87  | 0.94  | 1.37  | 1.42  | 1.68  | 1.0 | 0.16 | -1.99 | -0.78 |
| A020865_01 | At4g18780 | cellulose synthase - like prote                | 0 | -1.30 | 0.67  | 1.39  | 2.40  | 1.65  | 1.03  | 0.7 | 1.61 | -1.09 | -1.34 |
| A020877_01 | At5g03170 | fasciclin-like arabinogalactan-                | 0 | -0.79 | 0.50  | 1.01  | 2.46  | 1.86  | 1.04  | 0.7 | 1.61 | -1.22 | -1.35 |
| A021101_01 | At2g03350 | expressed protein; protein id:                 | 0 | -0.28 | -0.09 | -0.23 | 0.09  | -0.32 | -1.06 | 0.6 | 4.47 | 1.55  | 0.24  |
| A021199_01 | At3g24420 | unknown protein; protein id: A                 | 0 | 1.25  | 1.56  | 1.41  | 1.21  | 1.57  | 1.93  | 0.7 | 1.20 | -1.87 | 0.50  |
| A021618_01 | At2g02130 | plant defensin protein, putativ                | 0 | -1.40 | -0.69 | -0.48 | -0.82 | -0.72 | -1.11 | 0.7 | 1.20 | 1.74  | -1.40 |
| A021825_01 | At5g66230 | putative protein; protein id: At               | 0 | -2.95 | -2.81 | -1.83 | -2.34 | -2.25 | -1.78 | 1.2 | 0.06 | 1.91  | -2.04 |
| A022122_01 | At5g46240 | potassium channel protein <i>K<sub>v</sub></i> | 0 | NA    | 0.28  | 1.11  | 1.59  | 1.54  | 2.75  | 1.1 | 0.10 | NA    | NA    |
| A024432_01 | At1g13650 | unknown protein; protein id: A                 | 0 | 1.21  | 2.02  | 2.03  | 2.75  | 2.42  | 1.58  | 0.7 | 2.21 | -1.68 | 0.15  |
| A025631_01 | At1g12640 | unknown protein; protein id: A                 | 0 | 0.84  | 0.93  | 0.98  | 1.23  | 1.39  | 1.65  | 1.1 | 0.10 | -2.02 | -0.31 |
| A025993_01 | At5g55990 | calcineurin B-like protein 2 (gl               | 0 | -0.11 | 0.10  | 0.64  | 0.97  | 0.96  | 1.02  | 0.9 | 0.37 | -1.60 | -1.60 |
| A001615_01 | At1g24100 | UDP-glycosyltransferase fam                    | 0 | -0.05 | 0.65  | 0.94  | 1.27  | 1.01  | 1.89  | 0.6 | 4.47 | -1.63 | -1.02 |
| A009384_01 | At3g16920 | glycosyl hydrolase family 19 (                 | 0 | 0.27  | 1.58  | 2.41  | 4.30  | 3.26  | 2.44  | 0.8 | 0.96 | -1.59 | -0.90 |
| A019173_01 | At5g10690 | expressed protein; protein id:                 | 0 | -0.01 | -0.38 | -0.49 | -0.59 | -0.63 | -1.05 | 0.7 | 1.61 | 2.49  | 0.74  |
| A024387_01 | At4g26000 | KH domain protein; protein id                  | 0 | 0.47  | 0.82  | 0.74  | 1.18  | 1.03  | 0.55  | 1.0 | 0.16 | -1.57 | 0.04  |
| A024446_01 | At4g04610 | 5-adenylylsulfate reductase; p                 | 0 | -0.99 | -0.40 | 1.00  | 1.16  | 1.46  | 2.74  | 1.1 | 0.10 | -1.23 | -1.92 |
| A001491_01 | At1g67870 | expressed protein; protein id:                 | 0 | 0.69  | 1.45  | 1.59  | 2.13  | 2.37  | 2.51  | 0.7 | 1.20 | -1.99 | -0.79 |
| A000015_01 | At1g17560 | ribosomal protein, putative; pi                | 0 | -1.60 | -2.21 | -1.83 | -2.85 | -2.37 | -2.50 | 1.1 | 0.06 | 2.73  | -0.56 |
| A002438_01 | At1g75410 | BEL1-like homeodomain 3 pr                     | 0 | 1.35  | 1.56  | 1.70  | 1.85  | 1.94  | 2.21  | 1.3 | 0.06 | -2.03 | 0.14  |

|            |           |                                    |   |       |       |       |       |       |       |     |      |       |       |
|------------|-----------|------------------------------------|---|-------|-------|-------|-------|-------|-------|-----|------|-------|-------|
| A002620_01 | At1g12280 | disease resistance protein (C      | 0 | 0.32  | 0.33  | 0.65  | 1.27  | 1.40  | 1.56  | 1.0 | 0.20 | -1.77 | -1.29 |
| A004544_01 | At1g78420 | expressed protein; protein id:     | 0 | 0.43  | 0.61  | 0.72  | 0.72  | 0.88  | 1.13  | 1.0 | 0.20 | -2.00 | -0.43 |
| A004957_01 | At5g27280 | putative protein; protein id: At   | 0 | 0.30  | 0.99  | 1.06  | 1.57  | 1.64  | 1.27  | 1.7 | 0.06 | -1.86 | -0.79 |
| A006010_01 | At2g37130 | peroxidase, putative (ATP2a)       | 0 | 3.29  | 4.14  | 3.95  | 3.71  | 3.60  | 3.04  | 1.4 | 0.06 | -1.57 | 1.10  |
| A006526_01 | At2g43120 | similar to pirin-like protein; pro | 0 | -0.34 | -0.32 | 0.76  | 1.61  | 1.62  | 1.86  | 1.2 | 0.06 | -1.37 | -1.85 |
| A006614_01 | At2g37760 | aldo/keto reductase family; pr     | 0 | 0.72  | 0.88  | 0.77  | 0.66  | 0.80  | 1.19  | 0.8 | 0.55 | -1.80 | 0.51  |
| A006983_01 | At2g47720 | hypothetical protein; protein ic   | 0 | 0.75  | 0.89  | 1.06  | 1.02  | 1.44  | 1.75  | 1.6 | 0.06 | -1.97 | -0.38 |
| A007065_01 | At2g38910 | putative calcium-dependent p       | 0 | 1.45  | 0.94  | 0.53  | 0.56  | 0.58  | -0.02 | 0.8 | 0.55 | 0.26  | 1.99  |
| A007160_01 | At2g35770 | putative serine carboxypeptid      | 0 | 1.27  | 0.78  | 0.34  | 0.44  | 0.38  | -0.16 | 0.7 | 0.96 | 0.51  | 1.98  |
| A007253_01 | At2g20610 | putative tyrosine aminotransfe     | 0 | -0.12 | 0.48  | 0.91  | 1.07  | 1.16  | 2.09  | 1.0 | 0.18 | -1.62 | -1.32 |
| A007301_01 | At2g26670 | heme oxygenase 1 (HO1); pr         | 0 | 1.51  | 1.67  | 1.43  | 1.38  | 1.24  | 1.45  | 0.7 | 1.20 | -1.54 | 1.31  |
| A009204_01 | At3g55110 | ABC transporter family protei      | 0 | -0.45 | -0.76 | -1.05 | -1.64 | -1.98 | -1.74 | 0.9 | 0.37 | 2.60  | 0.68  |
| A009717_01 | At3g19150 | Kip-related protein 6; protein i   | 0 | 0.15  | 1.00  | 1.13  | 1.64  | 1.59  | 1.44  | 0.8 | 0.66 | -1.82 | -0.86 |
| A009718_01 | At3g24830 | 60S ribosomal protein, putativ     | 0 | -0.45 | -0.93 | -0.91 | -1.54 | -1.71 | -1.71 | 1.1 | 0.10 | 2.70  | 0.49  |
| A011147_01 | At3g16290 | FtsH protease, putative; prote     | 0 | -0.72 | -0.76 | -0.80 | -0.99 | -1.06 | -1.10 | 0.7 | 1.61 | 2.80  | -0.46 |
| A011464_01 | At3g10130 | unknown protein; protein id: A     | 0 | 0.70  | 1.04  | 1.11  | 1.40  | 1.47  | 1.50  | 1.5 | 0.06 | -2.05 | -0.36 |
| A011649_01 | At3g10770 | expressed protein; protein id:     | 0 | 0.81  | 0.51  | 0.47  | 0.67  | 1.00  | 0.67  | 0.7 | 1.20 | -1.51 | 0.33  |
| A011737_01 | At3g57530 | calcium-dependent protein kin      | 0 | 1.02  | 1.38  | 1.34  | 1.18  | 0.92  | 1.24  | 0.9 | 0.37 | -1.52 | 1.07  |
| A012405_01 | At3g11020 | DRE binding protein (DREB2)        | 0 | 0.87  | 1.12  | 0.97  | 1.38  | 1.36  | 0.87  | 1.5 | 0.06 | -1.72 | 0.41  |
| A012825_01 | At3g29240 | chloroplast lumen common pr        | 0 | 1.52  | 1.73  | 1.43  | 1.32  | 1.37  | 1.37  | 1.5 | 0.06 | -1.50 | 1.35  |
| A013881_01 | At4g32270 | compared to genome                 | 0 | -0.87 | -0.92 | -1.05 | -1.58 | -1.63 | -1.49 | 1.0 | 0.20 | 2.74  | -0.13 |
| A014791_01 | At4g27450 | unknown protein; protein id: A     | 0 | 2.76  | 2.70  | 2.91  | 3.03  | 3.07  | 2.88  | 1.2 | 0.06 | -1.85 | 0.72  |
| A014967_01 | At4g23900 | expressed protein; protein id:     | 0 | 1.77  | 1.49  | 1.10  | 0.69  | 1.28  | 0.75  | 1.0 | 0.16 | -0.60 | 1.79  |
| A015551_01 | At5g04210 | RRM-containing protein; prote      | 0 | -1.13 | -1.43 | NA    | -1.81 | -1.70 | -1.51 | 0.8 | 0.55 | NA    | NA    |
| A016527_01 | At5g56500 | rubisco subunit binding-protei     | 0 | -1.83 | -2.12 | -1.49 | -1.20 | NA    | -1.16 | 1.5 | 0.06 | NA    | NA    |
| A017523_01 | At5g64740 | cellulose synthase catalytic su    | 0 | -0.41 | -0.42 | -0.53 | -0.97 | -1.30 | -0.66 | 0.8 | 0.66 | 2.30  | 0.42  |
| A017547_01 | At5g55970 | putative protein; protein id: At   | 0 | 1.44  | 1.95  | 2.75  | 3.60  | 3.31  | 3.47  | 1.8 | 0.06 | -2.01 | -0.58 |
| A018765_01 | At5g60470 | putative zinc finger protein; pr   | 0 | -0.84 | -0.91 | -0.78 | -1.29 | -1.36 | -0.89 | 0.9 | 0.37 | 2.52  | -0.51 |
| A019001_01 | At5g22440 | 60S ribosomal protein L10A; j      | 0 | -0.73 | -1.21 | -1.08 | -1.76 | -2.18 | -2.03 | 1.0 | 0.14 | 2.74  | 0.30  |
| A019031_01 | At5g64240 | expressed protein; protein id:     | 0 | 1.48  | 1.70  | 1.88  | 2.34  | 2.81  | 3.23  | 1.1 | 0.14 | -2.00 | -0.48 |
| A019042_01 | At5g65910 | expressed protein; protein id:     | 0 | 0.79  | 0.68  | 0.82  | 1.08  | 1.30  | 1.29  | 1.2 | 0.06 | -1.94 | -0.36 |
| A019079_01 | At5g43150 | unknown protein; protein id: A     | 0 | -0.31 | 0.25  | 1.16  | 2.06  | 2.05  | 1.54  | 1.1 | 0.06 | -1.50 | -1.56 |
| A019792_01 | At2g41140 | CPDK-related protein kinase;       | 0 | 0.39  | 0.51  | 0.75  | 0.77  | 0.90  | 1.25  | 0.6 | 2.21 | -1.93 | -0.64 |
| A022274_01 | At4g20020 | DAG-like protein; protein id: A    | 0 | -0.79 | -0.92 | -0.85 | -1.54 | -0.90 | -1.42 | 0.9 | 0.27 | 2.50  | -0.27 |
| A024543_01 | At3g15840 | expressed protein; protein id:     | 0 | 0.98  | 1.60  | 1.62  | 1.95  | 1.99  | 1.66  | 1.1 | 0.14 | -1.93 | 0.02  |
| A024776_01 | At4g15545 | expressed protein; protein id:     | 0 | 0.90  | 0.90  | 0.89  | 0.99  | 1.11  | 1.00  | 0.7 | 1.20 | -1.90 | 0.53  |
| A025167_01 | At3g14640 | cytochrome P450, putative; p       | 0 | 1.10  | 1.33  | 1.43  | 1.40  | 1.25  | 1.25  | 0.6 | 4.47 | -1.80 | 0.80  |
| A026000_01 | At3g14660 | cytochrome P450, putative; p       | 0 | 0.26  | 0.51  | 0.83  | 1.04  | 1.31  | 1.03  | 0.7 | 0.96 | -1.86 | -1.01 |
| A026032_01 | At2g14470 | putative helicase; protein id: /   | 0 | 0.72  | 1.12  | 1.11  | 1.08  | 1.36  | 1.27  | 1.2 | 0.06 | -1.97 | 0.13  |
| A024469_01 | At5g59820 | zinc finger protein Zat12; prot    | 0 | 2.35  | 2.53  | 1.77  | 1.22  | 0.93  | 0.98  | 0.6 | 4.47 | -0.31 | 2.10  |

**Table S3.** Expression profile of differentially expressed genes in the dataset reduced to 0-1, 2-3 and 10-14 DPA

Differentially expressed genes based on 3% FDR multiclass SAM after technical replicas averaged and 2-fold change after biological replicas averaged. Normalized Log2 (mean ratio relative to 0-1 DPA mean), 3% FDR multiclass SAM Score (d) and q value, and SOM cluster number and description on the 4x2 SOM analysis are shown.

| Oligo ID   | AGI       | Annotation                                        | 0-1 DPA<br>Mean | 2-3 DPA<br>Mean | 10-11 and<br>12-14 DPA<br>Mean | Score(d)<br>SAM MC<br>(FDR 3%) | q-value<br>SAM MC<br>(FDR 3%) | SOM group | SOM description        |
|------------|-----------|---------------------------------------------------|-----------------|-----------------|--------------------------------|--------------------------------|-------------------------------|-----------|------------------------|
| A000061_01 | At1g76590 | expressed protein; protein id: At1g76590.1        | 0               | 3.20            | 3.35                           | 3.1                            | 0.05                          | 1         | Up early and sustained |
| A000098_01 | xxxx      | b/t hypothetical protein; protein id: At1g12450   | 0               | 2.35            | 3.10                           | 1.3                            | 1.42                          | 1         | Up early and sustained |
| A000124_01 | At1g23040 | expressed protein; protein id: At1g23040.1        | 0               | 1.99            | 2.60                           | 2.6                            | 0.05                          | 1         | Up early and sustained |
| A000173_01 | At1g44446 | chlorophyll a oxygenase; protein id: At1g44444    | 0               | 0.83            | 1.04                           | 1.8                            | 0.23                          | 1         | Up early and sustained |
| A000382_01 | At1g11080 | serine carboxypeptidase isolog; protein id: At1   | 0               | 1.97            | 1.50                           | 1.8                            | 0.17                          | 1         | Up early and sustained |
| A000410_01 | At1g02610 | hypothetical protein; protein id: At1g02610.1     | 0               | 2.49            | 3.00                           | 3.5                            | 0.05                          | 1         | Up early and sustained |
| A000555_01 | At1g72180 | leucine-rich repeat transmembrane protein kir     | 0               | 1.04            | 0.84                           | 1.2                            | 2.11                          | 1         | Up early and sustained |
| A000577_01 | At1g72160 | cytosolic factor, putative; protein id: At1g7216  | 0               | 0.84            | 1.15                           | 1.5                            | 0.60                          | 1         | Up early and sustained |
| A000612_01 | At1g13245 | expressed protein; protein id: At1g13245.1        | 0               | 1.60            | 2.13                           | 3.0                            | 0.05                          | 1         | Up early and sustained |
| A000639_01 | At1g16320 | unknown protein; protein id: At1g16320.1          | 0               | 1.32            | 1.61                           | 2.0                            | 0.08                          | 1         | Up early and sustained |
| A000652_01 | At1g29050 | expressed protein; protein id: At1g29050.1        | 0               | 1.31            | 1.53                           | 2.2                            | 0.05                          | 1         | Up early and sustained |
| A000795_01 | At1g66980 | kinase, putative; protein id: At1g66980.1         | 0               | 1.27            | 1.14                           | 1.7                            | 0.23                          | 1         | Up early and sustained |
| A000814_01 | At1g74840 | myb family transcription factor; protein id: At1g | 0               | 1.28            | 0.89                           | 1.2                            | 1.42                          | 1         | Up early and sustained |
| A000827_01 | At1g80160 | expressed protein; protein id: At1g80160.1        | 0               | 2.67            | 3.38                           | 3.6                            | 0.05                          | 1         | Up early and sustained |
| A000828_01 | At1g80180 | expressed protein; protein id: At1g80180.1        | 0               | 2.54            | 3.06                           | 3.1                            | 0.05                          | 1         | Up early and sustained |
| A000853_01 | At1g52680 | expressed protein; protein id: At1g52680.1        | 0               | 1.01            | 1.16                           | 1.4                            | 1.11                          | 1         | Up early and sustained |
| A000856_01 | At1g27300 | expressed protein; protein id: At1g27300.1        | 0               | 1.30            | 1.52                           | 2.1                            | 0.08                          | 1         | Up early and sustained |
| A001091_01 | At1g64680 | expressed protein; protein id: At1g64680.1        | 0               | 1.06            | 1.30                           | 2.3                            | 0.05                          | 1         | Up early and sustained |
| A001092_01 | At1g64860 | plastid RNA polymerase sigma-subunit; protei      | 0               | 1.18            | 1.17                           | 1.2                            | 2.11                          | 1         | Up early and sustained |
| A001093_01 | At1g79270 | expressed protein; protein id: At1g79270.1        | 0               | 1.62            | 1.88                           | 1.6                            | 0.36                          | 1         | Up early and sustained |
| A001105_01 | At1g14330 | hypothetical protein; protein id: At1g14330.1     | 0               | 1.15            | 0.94                           | 1.5                            | 0.60                          | 1         | Up early and sustained |
| A001121_01 | At1g58180 | carbonic anhydrase, putative; protein id: At1g    | 0               | 2.51            | 2.04                           | 3.2                            | 0.05                          | 1         | Up early and sustained |
| A001136_01 | At1g21410 | F-box protein family; protein id: At1g21410.1     | 0               | 1.45            | 1.53                           | 2.0                            | 0.08                          | 1         | Up early and sustained |
| A001180_01 | At1g70290 | trehalose-6-phosphate synthase, putative; pro     | 0               | 2.00            | 2.24                           | 3.1                            | 0.05                          | 1         | Up early and sustained |
| A001197_01 | At1g27320 | putative sensory transduction histidine kinase    | 0               | 1.68            | 1.95                           | 1.9                            | 0.11                          | 1         | Up early and sustained |
| A001222_01 | At1g78320 | glutathione transferase, putative; protein id: Ai | 0               | 1.08            | 1.02                           | 1.1                            | 5.44                          | 1         | Up early and sustained |
| A001234_01 | At1g64230 | E2, ubiquitin-conjugating enzyme, putative; pr    | 0               | 0.88            | 1.16                           | 2.1                            | 0.08                          | 1         | Up early and sustained |
| A001240_01 | At1g28260 | hypothetical protein; protein id: At1g28260.1     | 0               | 1.37            | 1.32                           | 2.1                            | 0.05                          | 1         | Up early and sustained |
| A001254_01 | At1g18270 | unknown protein; protein id: At1g18270.1          | 0               | 1.86            | 1.31                           | 2.3                            | 0.05                          | 1         | Up early and sustained |
| A001284_01 | At1g79040 | photosystem II polypeptide, putative; protein ic  | 0               | 1.05            | 1.46                           | 1.9                            | 0.08                          | 1         | Up early and sustained |
| A001303_01 | At1g15670 | expressed protein; protein id: At1g15670.1        | 0               | 2.25            | 2.49                           | 2.7                            | 0.05                          | 1         | Up early and sustained |
| A001378_01 | At1g32460 | expressed protein; protein id: At1g32460.1        | 0               | 1.10            | 1.09                           | 2.0                            | 0.08                          | 1         | Up early and sustained |
| A001390_01 | At1g45976 | S-ribonuclease binding protein SBP1, putative     | 0               | 0.85            | 1.04                           | 1.7                            | 0.23                          | 1         | Up early and sustained |
| A001451_01 | At1g21400 | branched-chain alpha keto-acid dehydrogenas       | 0               | 2.37            | 2.00                           | 2.3                            | 0.05                          | 1         | Up early and sustained |
| A001495_01 | At1g52890 | NAM-like protein; protein id: At1g52890.1         | 0               | 1.57            | 1.40                           | 2.0                            | 0.08                          | 1         | Up early and sustained |

|            |           |                                                   |   |      |      |     |      |                          |
|------------|-----------|---------------------------------------------------|---|------|------|-----|------|--------------------------|
| A001567_01 | At1g07040 | expressed protein; protein id: At1g07040.1        | 0 | 1.90 | 1.75 | 1.8 | 0.23 | 1 Up early and sustained |
| A001827_01 | At1g17050 | geranyl diphosphate synthase (GPPS)(dimeth        | 0 | 1.03 | 1.17 | 1.5 | 0.47 | 1 Up early and sustained |
| A001861_01 | At1g78510 | geranyl diphosphate synthase (GPPS)(dimeth        | 0 | 1.01 | 1.32 | 1.6 | 0.47 | 1 Up early and sustained |
| A001874_01 | At1g72680 | putative cinnamyl-alcohol dehydrogenase; pro      | 0 | 1.30 | 1.20 | 1.9 | 0.08 | 1 Up early and sustained |
| A001959_01 | At1g04400 | putative cryptochrome 2 apoprotein; protein id    | 0 | 1.05 | 0.76 | 1.2 | 2.11 | 1 Up early and sustained |
| A001970_01 | At1g06570 | 4-hydroxyphenylpyruvate dioxygenase (HPD);        | 0 | 2.18 | 2.16 | 2.4 | 0.05 | 1 Up early and sustained |
| A002008_01 | At1g47960 | expressed protein; protein id: At1g47960.1        | 0 | 1.90 | 2.18 | 2.3 | 0.05 | 1 Up early and sustained |
| A002118_01 | At1g78080 | AP2 domain protein RAP2.4; protein id: At1g7      | 0 | 1.31 | 1.48 | 2.3 | 0.05 | 1 Up early and sustained |
| A002126_01 | At1g02850 | glycosyl hydrolase family 1; protein id: At1g02   | 0 | 1.23 | 0.87 | 1.7 | 0.27 | 1 Up early and sustained |
| A002244_01 | At1g53560 | expressed protein; protein id: At1g53560.1        | 0 | 1.68 | 2.09 | 3.0 | 0.05 | 1 Up early and sustained |
| A002441_01 | At1g27100 | unknown protein; protein id: At1g27100.1          | 0 | 1.50 | 1.48 | 1.4 | 1.11 | 1 Up early and sustained |
| A002473_01 | At1g69110 | pseudogene, putative ribosomal protein            | 0 | 1.76 | 1.21 | 1.7 | 0.23 | 1 Up early and sustained |
| A002488_01 | At1g76110 | unknown protein; protein id: At1g76110.1          | 0 | 1.39 | 0.88 | 1.5 | 0.47 | 1 Up early and sustained |
| A002676_01 | At1g61810 | glycosyl hydrolase family 1; protein id: At1g61   | 0 | 2.29 | 2.56 | 2.4 | 0.05 | 1 Up early and sustained |
| A002732_01 | At1g73680 | feebly-like protein; protein id: At1g73680.1      | 0 | 1.02 | 1.23 | 1.6 | 0.47 | 1 Up early and sustained |
| A002736_01 | At1g29760 | hypothetical protein; protein id: At1g29760.1     | 0 | 1.09 | 1.18 | 1.6 | 0.47 | 1 Up early and sustained |
| A002737_01 | At1g28580 | lipase, putative; protein id: At1g28580.1         | 0 | 1.07 | 1.37 | 1.8 | 0.23 | 1 Up early and sustained |
| A002797_01 | At1g54710 | expressed protein; protein id: At1g54710.1        | 0 | 1.12 | 1.22 | 1.4 | 1.11 | 1 Up early and sustained |
| A002800_01 | At1g76150 | hypothetical protein; protein id: At1g76150.1     | 0 | 0.96 | 1.10 | 1.4 | 1.11 | 1 Up early and sustained |
| A002855_01 | At1g32700 | expressed protein; protein id: At1g32700.1        | 0 | 1.70 | 2.10 | 2.5 | 0.05 | 1 Up early and sustained |
| A002871_01 | At1g34300 | hypothetical protein; protein id: At1g34300.1     | 0 | 0.91 | 1.17 | 1.4 | 0.75 | 1 Up early and sustained |
| A002917_01 | At1g68620 | expressed protein; protein id: At1g68620.1        | 0 | 3.00 | 1.95 | 2.3 | 0.05 | 1 Up early and sustained |
| A003084_01 | At1g05340 | expressed protein; protein id: At1g05340.1        | 0 | 2.81 | 2.59 | 2.8 | 0.05 | 1 Up early and sustained |
| A003114_01 | At1g19450 | integral membrane protein, putative; protein ic   | 0 | 1.16 | 1.12 | 1.6 | 0.41 | 1 Up early and sustained |
| A003121_01 | At1g55110 | zinc finger protein, putative; protein id: At1g55 | 0 | 1.01 | 0.90 | 1.6 | 0.41 | 1 Up early and sustained |
| A003130_01 | At1g30090 | expressed protein; protein id: At1g30090.1        | 0 | 1.11 | 0.67 | 1.1 | 5.44 | 1 Up early and sustained |
| A003134_01 | At1g26440 | fatty acid elongase 3-ketoacyl-CoA synthase 1     | 0 | 0.75 | 1.06 | 1.7 | 0.27 | 1 Up early and sustained |
| A003186_01 | At1g67070 | phosphomannose isomerase, putative; proteir       | 0 | 2.18 | 1.44 | 3.3 | 0.05 | 1 Up early and sustained |
| A003337_01 | At1g52760 | putative lipase; protein id: At1g52760.1          | 0 | 0.79 | 1.11 | 1.1 | 5.44 | 1 Up early and sustained |
| A003475_01 | At1g80920 | J8-like protein; protein id: At1g80920.1          | 0 | 2.03 | 1.93 | 2.2 | 0.05 | 1 Up early and sustained |
| A003510_01 | At1g10140 | expressed protein; protein id: At1g10140.1        | 0 | 2.09 | 1.37 | 2.2 | 0.05 | 1 Up early and sustained |
| A003518_01 | At1g79380 | expressed protein; protein id: At1g79380.1        | 0 | 1.16 | 1.32 | 1.9 | 0.11 | 1 Up early and sustained |
| A003538_01 | At1g03610 | expressed protein; protein id: At1g03610.1        | 0 | 1.57 | 1.47 | 2.6 | 0.05 | 1 Up early and sustained |
| A003544_01 | At1g16720 | unknown protein; protein id: At1g16720.1          | 0 | 1.31 | 1.06 | 1.5 | 0.47 | 1 Up early and sustained |
| A003556_01 | At1g34000 | expressed protein; protein id: At1g34000.1        | 0 | 0.86 | 1.18 | 1.7 | 0.36 | 1 Up early and sustained |
| A003614_01 | At1g33050 | unknown protein; protein id: At1g33050.1          | 0 | 1.40 | 1.49 | 1.7 | 0.36 | 1 Up early and sustained |
| A003636_01 | At1g05840 | expressed protein; protein id: At1g05840.1        | 0 | 1.14 | 1.23 | 1.2 | 2.11 | 1 Up early and sustained |
| A003675_01 | At1g70520 | putative protein kinase; protein id: At1g70520.   | 0 | 1.27 | 0.98 | 1.3 | 1.42 | 1 Up early and sustained |
| A003925_01 | At1g54130 | RSH3 (RelA/SpoT homolog); protein id: At1g5       | 0 | 0.84 | 1.15 | 1.5 | 0.60 | 1 Up early and sustained |
| A003989_01 | At1g11210 | expressed protein; protein id: At1g11210.1        | 0 | 1.93 | 2.16 | 3.2 | 0.05 | 1 Up early and sustained |
| A004039_01 | xxxx      | b/t F-box protein family; protein id: At1g67190   | 0 | 1.01 | 1.20 | 1.2 | 2.11 | 1 Up early and sustained |
| A004048_01 | At1g18470 | expressed protein; protein id: At1g18470.1        | 0 | 1.41 | 1.00 | 1.4 | 1.11 | 1 Up early and sustained |
| A004151_01 | At1g33110 | unknown protein; protein id: At1g33110.1          | 0 | 1.08 | 1.41 | 1.8 | 0.19 | 1 Up early and sustained |
| A004173_01 | At1g29800 | unknown protein; protein id: At1g29800.1          | 0 | 1.08 | 1.11 | 1.8 | 0.19 | 1 Up early and sustained |
| A004177_01 | At1g63180 | uridine diphosphate glucose epimerase, putat      | 0 | 1.23 | 0.74 | 1.9 | 0.11 | 1 Up early and sustained |

|            |               |                                                     |   |      |      |     |      |                          |
|------------|---------------|-----------------------------------------------------|---|------|------|-----|------|--------------------------|
| A004243_01 | At1g26800     | expressed protein; protein id: At1g26800.1          | 0 | 1.94 | 1.79 | 2.3 | 0.05 | 1 Up early and sustained |
| A004276_01 | At1g03660     | unknown; protein id: At1g03660.1                    | 0 | 2.84 | 2.46 | 2.5 | 0.05 | 1 Up early and sustained |
| A004350_01 | At1g80600     | putative acetylornithine transaminase; protein      | 0 | 0.90 | 1.12 | 1.2 | 2.11 | 1 Up early and sustained |
| A004408_01 | At1g49500     | expressed protein; protein id: At1g49500.1          | 0 | 1.84 | 1.49 | 1.4 | 1.11 | 1 Up early and sustained |
| A004437_01 | At1g80440     | expressed protein; protein id: At1g80440.1          | 0 | 2.13 | 2.53 | 2.6 | 0.05 | 1 Up early and sustained |
| A004495_01 | At1g68520     | CONSTANS B-box zinc finger family protein; p        | 0 | 1.71 | 1.31 | 2.0 | 0.08 | 1 Up early and sustained |
| A004511_01 | At1g15740     | expressed protein; protein id: At1g15740.1          | 0 | 1.60 | 1.35 | 1.7 | 0.27 | 1 Up early and sustained |
| A004597_01 | At1g23390     | Kelch repeat containing F-box protein family; p     | 0 | 1.79 | 1.81 | 2.4 | 0.05 | 1 Up early and sustained |
| A004612_01 | At1g67860     | expressed protein; protein id: At1g67860.1          | 0 | 2.98 | 3.93 | 3.5 | 0.05 | 1 Up early and sustained |
| A004704_01 | At1g28330     | dormancy-associated protein, putative; proteir      | 0 | 2.20 | 1.36 | 1.5 | 0.60 | 1 Up early and sustained |
| A004705_01 | At1g04440     | putative casein kinase I; protein id: At1g04440     | 0 | 0.94 | 1.04 | 1.4 | 1.11 | 1 Up early and sustained |
| A004735_01 | At1g68580     | unknown protein; protein id: At1g68580.1            | 0 | 1.21 | 1.29 | 2.0 | 0.08 | 1 Up early and sustained |
| A004748_01 | At1g44770     | unknown protein; protein id: At1g44770.1            | 0 | 0.94 | 1.01 | 1.3 | 1.11 | 1 Up early and sustained |
| A004774_01 | At1g04970     | expressed protein; protein id: At1g04970.1          | 0 | 1.16 | 1.34 | 1.4 | 0.75 | 1 Up early and sustained |
| A004896_01 | At1g09570     | putative phytochrome A; protein id: At1g09570       | 0 | 1.07 | 1.03 | 1.8 | 0.19 | 1 Up early and sustained |
| A004915_01 | At1g60140     | trehalose-6-phosphate synthase, putative; pro       | 0 | 1.59 | 1.88 | 2.4 | 0.05 | 1 Up early and sustained |
| A005009_01 | xxxx          | b/t unknown protein; protein id: At1g49030.1        | 0 | 1.52 | 1.41 | 2.5 | 0.05 | 1 Up early and sustained |
| A005086_01 | At1g22930     | unknown protein; protein id: At1g22930.1            | 0 | 1.59 | 1.89 | 1.2 | 2.11 | 1 Up early and sustained |
| A005097_01 | At3g51840     | acyl-coA dehydrogenase; protein id: At3g51840       | 0 | 1.12 | 1.57 | 2.3 | 0.05 | 1 Up early and sustained |
| A005182_01 | At2g28305     | expressed protein; protein id: At2g28305.1          | 0 | 1.45 | 1.61 | 1.6 | 0.36 | 1 Up early and sustained |
| A005366_01 | At5g20250     | glycosyl hydrolase family 36; protein id: At5g20250 | 0 | 2.35 | 1.68 | 1.3 | 1.42 | 1 Up early and sustained |
| A005557_01 | At3g51890     | putative protein; protein id: At3g51890.1           | 0 | 1.55 | 2.09 | 3.7 | 0.05 | 1 Up early and sustained |
| A005562_01 | At1g23870     | trehalose 6-phosphate synthase, putative; pro       | 0 | 1.54 | 1.90 | 3.0 | 0.05 | 1 Up early and sustained |
| A005629_01 | At5g21170     | AKIN beta1; protein id: At5g21170.1                 | 0 | 1.33 | 0.95 | 1.6 | 0.47 | 1 Up early and sustained |
| A005751_01 | At4g37520     | peroxidase, putative; protein id: At4g37520.1       | 0 | 2.92 | 3.62 | 5.1 | 0.05 | 1 Up early and sustained |
| A005981_01 | At1g20620     | catalase 3; protein id: At1g20620.1                 | 0 | 1.44 | 1.84 | 2.6 | 0.05 | 1 Up early and sustained |
| A006021_01 | not annotated | EST ethylene-responsive element binding pr          | 0 | 2.12 | 1.72 | 1.8 | 0.19 | 1 Up early and sustained |
| A006022_01 | At4g20260     | endomembrane-associated protein; protein id         | 0 | 2.17 | 3.06 | 2.5 | 0.05 | 1 Up early and sustained |
| A006056_01 | At2g37970     | expressed protein; protein id: At2g37970.1          | 0 | 1.25 | 1.77 | 1.6 | 0.36 | 1 Up early and sustained |
| A006227_01 | At2g30230     | hypothetical protein; protein id: At2g30230.1       | 0 | 1.74 | 0.99 | 1.5 | 0.60 | 1 Up early and sustained |
| A006235_01 | At2g42790     | putative citrate synthase; protein id: At2g42790    | 0 | 1.69 | 2.37 | 2.6 | 0.05 | 1 Up early and sustained |
| A006253_01 | At2g24180     | cytochrome p450 family; protein id: At2g24180       | 0 | 1.02 | 1.33 | 1.6 | 0.47 | 1 Up early and sustained |
| A006277_01 | At2g35800     | putative mitochondrial carrier protein; protein i   | 0 | 1.06 | 0.71 | 1.5 | 0.60 | 1 Up early and sustained |
| A006291_01 | At2g33990     | putative SF16 protein {Helianthus annuus}; pr       | 0 | 1.05 | 0.68 | 1.4 | 1.11 | 1 Up early and sustained |
| A006421_01 | At2g38230     | similar to SOR1 from the fungus Cercospora r        | 0 | 1.65 | 1.19 | 1.7 | 0.23 | 1 Up early and sustained |
| A006771_01 | At2g35900     | hypothetical protein; protein id: At2g35900.1       | 0 | 1.53 | 1.98 | 2.8 | 0.05 | 1 Up early and sustained |
| A006799_01 | At2g23430     | Kip-related protein 1; protein id: At2g23430.1      | 0 | 2.05 | 2.60 | 1.2 | 2.11 | 1 Up early and sustained |
| A006811_01 | At2g13360     | alanine-glyoxylate aminotransferase; protein ic     | 0 | 1.50 | 1.81 | 3.5 | 0.05 | 1 Up early and sustained |
| A006817_01 | At2g14910     | unknown protein; protein id: At2g14910.1            | 0 | 1.02 | 1.32 | 2.2 | 0.05 | 1 Up early and sustained |
| A006826_01 | At2g19570     | putative cytidine deaminase; protein id: At2g19570  | 0 | 1.74 | 2.04 | 1.6 | 0.41 | 1 Up early and sustained |
| A006885_01 | At2g02710     | putative receptor-like protein kinase; protein ic   | 0 | 2.42 | 2.66 | 2.7 | 0.05 | 1 Up early and sustained |
| A006897_01 | At2g32880     | unknown protein; protein id: At2g32880.1            | 0 | 1.62 | 2.26 | 1.2 | 2.11 | 1 Up early and sustained |
| A006919_01 | At2g46950     | cytochrome p450, putative; protein id: At2g46950    | 0 | 2.87 | 3.09 | 3.0 | 0.05 | 1 Up early and sustained |
| A007075_01 | At2g21180     | expressed protein; protein id: At2g21180.1          | 0 | 1.43 | 1.81 | 2.3 | 0.05 | 1 Up early and sustained |
| A007148_01 | At2g42750     | expressed protein; protein id: At2g42750.1          | 0 | 1.72 | 2.21 | 3.1 | 0.05 | 1 Up early and sustained |

|            |           |                                                   |   |      |      |     |      |   |                        |
|------------|-----------|---------------------------------------------------|---|------|------|-----|------|---|------------------------|
| A007336_01 | At2g28400 | hypothetical protein; protein id: At2g28400.1     | 0 | 2.34 | 2.10 | 1.8 | 0.17 | 1 | Up early and sustained |
| A007347_01 | At2g23320 | WRKY family transcription factor; protein id: A   | 0 | 1.75 | 1.32 | 2.1 | 0.08 | 1 | Up early and sustained |
| A007422_01 | At2g48020 | putative sugar transporter; protein id: At2g480   | 0 | 1.19 | 1.19 | 1.9 | 0.17 | 1 | Up early and sustained |
| A007431_01 | At2g28200 | putative zinc-finger protein; protein id: At2g28: | 0 | 0.87 | 1.06 | 1.5 | 0.47 | 1 | Up early and sustained |
| A007530_01 | At2g03550 | putative esterase; protein id: At2g03550.1        | 0 | 1.26 | 1.10 | 1.6 | 0.41 | 1 | Up early and sustained |
| A007535_01 | At2g15960 | expressed protein; protein id: At2g15960.1        | 0 | 2.67 | 2.19 | 3.2 | 0.05 | 1 | Up early and sustained |
| A007590_01 | At2g23450 | putative protein kinase; protein id: At2g23450.   | 0 | 1.84 | 1.69 | 2.2 | 0.05 | 1 | Up early and sustained |
| A007696_01 | At2g39400 | putative phospholipase; protein id: At2g39400     | 0 | 3.23 | 2.89 | 2.4 | 0.05 | 1 | Up early and sustained |
| A007704_01 | At2g39570 | expressed protein; protein id: At2g39570.1        | 0 | 1.41 | 0.99 | 1.6 | 0.41 | 1 | Up early and sustained |
| A007750_01 | At2g33480 | putative NAM (no apical meristem)-like proteir    | 0 | 2.28 | 2.72 | 2.6 | 0.05 | 1 | Up early and sustained |
| A007756_01 | At2g41250 | hypothetical protein; protein id: At2g41250.1     | 0 | 1.21 | 1.01 | 1.2 | 5.44 | 1 | Up early and sustained |
| A007794_01 | At2g01850 | xyloglucan endotransglycosylase (EXGT-A3);        | 0 | 1.34 | 1.41 | 2.2 | 0.05 | 1 | Up early and sustained |
| A007959_01 | At2g45980 | expressed protein; protein id: At2g45980.1        | 0 | 1.05 | 1.14 | 1.7 | 0.27 | 1 | Up early and sustained |
| A007966_01 | At2g31800 | putative protein kinase; protein id: At2g31800.   | 0 | 1.37 | 1.49 | 2.2 | 0.05 | 1 | Up early and sustained |
| A007977_01 | At2g18050 | histone H1; protein id: At2g18050.1               | 0 | 3.03 | 2.83 | 2.9 | 0.05 | 1 | Up early and sustained |
| A008183_01 | At2g26030 | F-box protein; protein id: At2g26030.1            | 0 | 1.04 | 0.77 | 1.4 | 0.75 | 1 | Up early and sustained |
| A008454_01 | At2g20730 | unknown protein; protein id: At2g20730.1          | 0 | 1.11 | 1.14 | 1.9 | 0.08 | 1 | Up early and sustained |
| A008481_01 | At2g21120 | unknown protein; protein id: At2g21120.1          | 0 | 1.24 | 1.23 | 1.8 | 0.23 | 1 | Up early and sustained |
| A008532_01 | At2g33150 | 3-ketoacyl-CoA thiolase; protein id: At2g33150    | 0 | 1.08 | 1.35 | 1.9 | 0.08 | 1 | Up early and sustained |
| A008637_01 | At2g43400 | putative electron transfer flavoprotein ubiquinc  | 0 | 1.17 | 0.72 | 1.8 | 0.19 | 1 | Up early and sustained |
| A008664_01 | At2g45170 | AtAPG8e; putative microtubule-associated pro      | 0 | 1.67 | 2.16 | 2.7 | 0.05 | 1 | Up early and sustained |
| A008667_01 | At2g46030 | E2, ubiquitin-conjugating enzyme 6 (UBC6); p      | 0 | 1.37 | 1.37 | 1.6 | 0.41 | 1 | Up early and sustained |
| A008692_01 | At2g15890 | expressed protein; protein id: At2g15890.1        | 0 | 2.22 | 1.88 | 1.5 | 0.47 | 1 | Up early and sustained |
| A008722_01 | At2g18700 | putative trehalose-6-phosphate synthase; prot     | 0 | 2.13 | 1.97 | 2.3 | 0.05 | 1 | Up early and sustained |
| A008733_01 | At2g17450 | putative RING zinc finger protein; protein id: A  | 0 | 1.13 | 1.19 | 1.9 | 0.08 | 1 | Up early and sustained |
| A009064_01 | At3g56140 | chloroplast lumen common protein family; pro      | 0 | 0.89 | 1.13 | 2.4 | 0.05 | 1 | Up early and sustained |
| A009077_01 | At3g25690 | unknown protein; protein id: At3g25690.1          | 0 | 1.04 | 1.15 | 1.3 | 1.42 | 1 | Up early and sustained |
| A009121_01 | At3g63210 | putative protein; protein id: At3g63210.1         | 0 | 1.02 | 1.02 | 1.4 | 0.75 | 1 | Up early and sustained |
| A009305_01 | At3g22750 | expressed protein; protein id: At3g22750.1        | 0 | 1.49 | 1.30 | 1.9 | 0.17 | 1 | Up early and sustained |
| A009434_01 | At3g57720 | protein kinase - like protein; protein id: At3g57 | 0 | 1.83 | 1.11 | 2.1 | 0.05 | 1 | Up early and sustained |
| A009525_01 | At3g53420 | plasma membrane intrinsic protein 2a; protein     | 0 | 1.33 | 1.07 | 1.2 | 2.11 | 1 | Up early and sustained |
| A009551_01 | At3g45780 | nonphototropic hypocotyl 1; protein id: At3g45    | 0 | 1.11 | 1.06 | 2.2 | 0.05 | 1 | Up early and sustained |
| A009557_01 | At3g12320 | expressed protein; protein id: At3g12320.1        | 0 | 1.31 | 1.33 | 1.3 | 1.42 | 1 | Up early and sustained |
| A009780_01 | At3g01520 | expressed protein; protein id: At3g01520.1        | 0 | 1.00 | 0.90 | 1.2 | 2.11 | 1 | Up early and sustained |
| A009848_01 | At3g02140 | expressed protein; protein id: At3g02140.1        | 0 | 2.00 | 2.09 | 2.8 | 0.05 | 1 | Up early and sustained |
| A009906_01 | At3g06420 | AtAPG8h; expressed protein; protein id: At3g0     | 0 | 2.07 | 1.82 | 2.2 | 0.05 | 1 | Up early and sustained |
| A010276_01 | At3g54500 | putative protein; protein id: At3g54500.1         | 0 | 1.00 | 1.32 | 1.4 | 0.75 | 1 | Up early and sustained |
| A010307_01 | At3g26165 | pseudogene, cytochrome P450 At3g26165             | 0 | 2.18 | 2.23 | 2.6 | 0.05 | 1 | Up early and sustained |
| A010318_01 | At3g51730 | putative protein; protein id: At3g51730.1         | 0 | 2.12 | 2.17 | 2.4 | 0.05 | 1 | Up early and sustained |
| A010323_01 | At3g52480 | putative protein; protein id: At3g52480.1         | 0 | 1.33 | 1.73 | 2.0 | 0.08 | 1 | Up early and sustained |
| A010364_01 | At3g11100 | expressed protein; protein id: At3g11100.1        | 0 | 1.22 | 1.19 | 1.5 | 0.60 | 1 | Up early and sustained |
| A010383_01 | At3g45010 | carboxypeptidase precursor-like protein; prote    | 0 | 1.91 | 2.14 | 2.1 | 0.08 | 1 | Up early and sustained |
| A010390_01 | At3g15770 | hypothetical protein; protein id: At3g15770.1     | 0 | 1.18 | 0.87 | 1.2 | 2.11 | 1 | Up early and sustained |
| A010464_01 | At3g19900 | expressed protein; protein id: At3g19900.1        | 0 | 1.25 | 1.19 | 1.2 | 2.11 | 1 | Up early and sustained |
| A010617_01 | At3g05160 | putative sugar transporter; protein id: At3g051   | 0 | 1.47 | 1.97 | 3.4 | 0.05 | 1 | Up early and sustained |



|            |           |                                                             |   |      |      |     |      |                          |
|------------|-----------|-------------------------------------------------------------|---|------|------|-----|------|--------------------------|
| A010658_01 | At3g55610 | delta-1-pyrroline-5-carboxylate synthetase; pr              | 0 | 1.48 | 0.98 | 1.1 | 5.44 | 1 Up early and sustained |
| A010805_01 | At3g03870 | expressed protein; protein id: At3g03870.1                  | 0 | 1.82 | 2.18 | 2.6 | 0.05 | 1 Up early and sustained |
| A011094_01 | At3g21790 | putative UDP-glucose glucosyltransferase; pr                | 0 | 1.44 | 1.99 | 2.0 | 0.08 | 1 Up early and sustained |
| A011130_01 | At3g14280 | unknown protein; protein id: At3g14280.1                    | 0 | 2.45 | 2.95 | 3.7 | 0.05 | 1 Up early and sustained |
| A011307_01 | At3g59210 | putative protein; protein id: At3g59210.1                   | 0 | 1.59 | 1.11 | 1.3 | 1.11 | 1 Up early and sustained |
| A011428_01 | At3g09030 | hypothetical protein; protein id: At3g09030.1               | 0 | 0.91 | 1.27 | 1.4 | 0.75 | 1 Up early and sustained |
| A011429_01 | At3g20250 | pumilio-family RNA-binding protein, putative; p             | 0 | 1.37 | 1.34 | 1.5 | 0.60 | 1 Up early and sustained |
| A011613_01 | At3g23640 | glycosyl hydrolase family 31; protein id: At3g2             | 0 | 1.17 | 0.82 | 1.3 | 1.42 | 1 Up early and sustained |
| A011631_01 | At3g61260 | putative DNA-binding protein; protein id: At3g6             | 0 | 1.37 | 1.35 | 1.7 | 0.27 | 1 Up early and sustained |
| A011732_01 | At3g62420 | bZIP family transcription factor; protein id: At3           | 0 | 1.06 | 0.94 | 1.5 | 0.47 | 1 Up early and sustained |
| A011750_01 | At3g58740 | citrate synthase -like protein; protein id: At3g5           | 0 | 0.97 | 1.21 | 2.0 | 0.08 | 1 Up early and sustained |
| A011763_01 | At3g14990 | 4-methyl-5(b-hydroxyethyl)-thiazole monophos                | 0 | 1.26 | 0.95 | 1.6 | 0.36 | 1 Up early and sustained |
| A011777_01 | At3g13445 | transcription initiation factor TFIID-1 (TATA se            | 0 | 1.49 | 1.13 | 1.6 | 0.41 | 1 Up early and sustained |
| A011819_01 | At3g61890 | homeobox-leucine zipper protein ATHB-12; pr                 | 0 | 2.21 | 2.54 | 2.2 | 0.05 | 1 Up early and sustained |
| A011831_01 | At3g51130 | putative protein; protein id: At3g51130.1                   | 0 | 1.16 | 1.13 | 1.5 | 0.60 | 1 Up early and sustained |
| A011854_01 | At3g45640 | mitogen-activated protein kinase 3; protein id:             | 0 | 1.08 | 1.12 | 1.5 | 0.60 | 1 Up early and sustained |
| A011912_01 | At3g45300 | isovaleryl-CoA-dehydrogenase precursor (IVC                 | 0 | 2.96 | 2.32 | 2.3 | 0.05 | 1 Up early and sustained |
| A011932_01 | At3g61930 | hypothetical protein; protein id: At3g61930.1               | 0 | 2.07 | 2.05 | 1.9 | 0.11 | 1 Up early and sustained |
| A012001_01 | At3g06780 | expressed protein; protein id: At3g06780.1                  | 0 | 1.02 | 1.34 | 1.6 | 0.36 | 1 Up early and sustained |
| A012086_01 | At3g17000 | E2, ubiquitin-conjugating enzyme, putative; pr              | 0 | 1.02 | 0.94 | 1.3 | 1.42 | 1 Up early and sustained |
| A012123_01 | At3g18773 | pseudogene, unknown protein                                 | 0 | 1.19 | 1.23 | 1.8 | 0.19 | 1 Up early and sustained |
| A012367_01 | At3g21650 | B regulatory subunit of PP2A, putative; proteir             | 0 | 0.92 | 1.14 | 1.5 | 0.60 | 1 Up early and sustained |
| A012379_01 | At3g16110 | putative protein disulfide isomerase; protein id            | 0 | 1.29 | 1.40 | 1.9 | 0.11 | 1 Up early and sustained |
| A012385_01 | At3g06040 | hypothetical protein; protein id: At3g06040.1               | 0 | 1.21 | 1.08 | 2.2 | 0.05 | 1 Up early and sustained |
| A012421_01 | At3g19500 | expressed protein; protein id: At3g19500.1                  | 0 | 1.06 | 1.42 | 1.9 | 0.11 | 1 Up early and sustained |
| A012430_01 | At3g59270 | putative protein; protein id: At3g59270.1                   | 0 | 3.26 | 1.93 | 2.4 | 0.05 | 1 Up early and sustained |
| A012502_01 | At3g07870 | F-box protein family; protein id: At3g07870.1               | 0 | 1.58 | 1.75 | 3.1 | 0.05 | 1 Up early and sustained |
| A012655_01 | At3g23970 | hypothetical protein; protein id: At3g23970.1               | 0 | 1.99 | 1.84 | 2.6 | 0.05 | 1 Up early and sustained |
| A012694_01 | At3g26580 | unknown protein; protein id: At3g26580.1                    | 0 | 1.44 | 1.41 | 1.7 | 0.36 | 1 Up early and sustained |
| A012695_01 | At3g62260 | protein phosphatase 2C (PP2C); protein id: At               | 0 | 1.47 | 1.61 | 1.9 | 0.17 | 1 Up early and sustained |
| A012707_01 | At3g51000 | epoxide hydrolase-like protein; protein id: At3g            | 0 | 0.90 | 1.07 | 1.3 | 1.42 | 1 Up early and sustained |
| A012738_01 | At3g26890 | expressed protein; protein id: At3g26890.1                  | 0 | 0.90 | 1.05 | 1.8 | 0.23 | 1 Up early and sustained |
| A012754_01 | At3g13750 | glycosyl hydrolase family 35 (beta-galactosida              | 0 | 2.17 | 2.02 | 1.6 | 0.36 | 1 Up early and sustained |
| A012770_01 | At3g55980 | putative protein; protein id: At3g55980.1                   | 0 | 0.93 | 1.19 | 1.5 | 0.47 | 1 Up early and sustained |
| A012771_01 | At3g58750 | citrate synthase -like protein; protein id: At3g5           | 0 | 1.09 | 1.06 | 1.9 | 0.08 | 1 Up early and sustained |
| A012812_01 | At3g47950 | H <sup>+</sup> -transporting ATPase - like protein; protein | 0 | 2.80 | 2.07 | 1.9 | 0.08 | 1 Up early and sustained |
| A012838_01 | At3g47160 | RNA-binding protein-like protein; protein id: At            | 0 | 1.40 | 1.26 | 1.3 | 1.42 | 1 Up early and sustained |
| A012847_01 | At3g15810 | expressed protein; protein id: At3g15810.1                  | 0 | 1.29 | 1.81 | 2.9 | 0.05 | 1 Up early and sustained |
| A012944_01 | At4g32070 | putative protein; protein id: At4g32070.1                   | 0 | 1.10 | 1.42 | 1.5 | 0.60 | 1 Up early and sustained |
| A012964_01 | At4g19510 | disease resistance protein (TIR-NBS-LRR cla                 | 0 | 1.03 | 1.12 | 1.7 | 0.27 | 1 Up early and sustained |
| A013000_01 | At4g34350 | putative protein; protein id: At4g34350.1                   | 0 | 1.39 | 1.82 | 1.6 | 0.41 | 1 Up early and sustained |
| A013032_01 | At4g24020 | putative protein; protein id: At4g24020.1                   | 0 | 0.99 | 1.14 | 1.5 | 0.47 | 1 Up early and sustained |
| A013044_01 | At4g23890 | putative protein; protein id: At4g23890.1                   | 0 | 1.17 | 1.12 | 1.6 | 0.41 | 1 Up early and sustained |
| A013046_01 | At4g21560 | putative protein; protein id: At4g21560.1                   | 0 | 1.02 | 0.72 | 1.6 | 0.41 | 1 Up early and sustained |
| A013050_01 | At4g01026 | expressed protein; protein id: At4g01026.1                  | 0 | 0.85 | 1.05 | 1.6 | 0.41 | 1 Up early and sustained |

|            |           |                                                    |   |      |      |     |      |                          |
|------------|-----------|----------------------------------------------------|---|------|------|-----|------|--------------------------|
| A013086_01 | At4g21580 | putative NADPH quinone oxidoreductase; pro         | 0 | 1.33 | 0.98 | 2.0 | 0.08 | 1 Up early and sustained |
| A013095_01 | At4g02520 | glutathione transferase, putative; protein id: At  | 0 | 3.46 | 2.26 | 2.4 | 0.05 | 1 Up early and sustained |
| A013240_01 | At4g10920 | putative protein; protein id: At4g10920.1          | 0 | 2.16 | 1.58 | 3.3 | 0.05 | 1 Up early and sustained |
| A013435_01 | At4g01600 | putative ABA-repsonsive protein; protein id: A     | 0 | 1.34 | 1.89 | 1.8 | 0.19 | 1 Up early and sustained |
| A013697_01 | At4g15610 | expressed protein; protein id: At4g15610.1         | 0 | 3.16 | 3.27 | 2.9 | 0.05 | 1 Up early and sustained |
| A013714_01 | At4g01610 | cathepsin B-like cysteine protease, putative; p    | 0 | 1.67 | 1.71 | 2.0 | 0.08 | 1 Up early and sustained |
| A013782_01 | At4g20930 | 3-hydroxyisobutyrate dehydrogenase -like pro       | 0 | 1.13 | 0.97 | 1.7 | 0.27 | 1 Up early and sustained |
| A013805_01 | At4g21980 | AtAPG8a; symbiosis-related like protein; prote     | 0 | 1.54 | 1.81 | 2.2 | 0.05 | 1 Up early and sustained |
| A014031_01 | At4g26700 | fimbrin-like protein (ATFIM1); protein id: At4g    | 0 | 1.13 | 1.49 | 2.5 | 0.05 | 1 Up early and sustained |
| A014066_01 | At4g23880 | hypothetical protein; protein id: At4g23880.1      | 0 | 2.24 | 1.62 | 2.4 | 0.05 | 1 Up early and sustained |
| A014072_01 | At4g16520 | AtAPG8f; symbiosis-related like protein; prote     | 0 | 1.16 | 1.35 | 2.2 | 0.05 | 1 Up early and sustained |
| A014097_01 | At4g22920 | expressed protein; protein id: At4g22920.1         | 0 | 2.19 | 2.96 | 2.3 | 0.05 | 1 Up early and sustained |
| A014126_01 | At4g28025 | expressed protein; protein id: At4g28025.1         | 0 | 1.09 | 1.06 | 1.8 | 0.23 | 1 Up early and sustained |
| A014130_01 | At4g30490 | putative protein; protein id: At4g30490.1          | 0 | 1.00 | 1.30 | 1.1 | 5.44 | 1 Up early and sustained |
| A014147_01 | At4g36400 | actin interacting protein; protein id: At4g36400   | 0 | 1.20 | 0.77 | 1.5 | 0.47 | 1 Up early and sustained |
| A014161_01 | At4g36760 | aminopeptidase-like protein; protein id: At4g36    | 0 | 1.45 | 1.00 | 1.5 | 0.60 | 1 Up early and sustained |
| A014165_01 | At4g30790 | putative protein; protein id: At4g30790.1          | 0 | 1.04 | 1.00 | 1.3 | 1.42 | 1 Up early and sustained |
| A014276_01 | At4g13530 | putative protein; protein id: At4g13530.1          | 0 | 1.51 | 1.37 | 1.4 | 1.11 | 1 Up early and sustained |
| A014295_01 | At4g11570 | putative protein; protein id: At4g11570.1          | 0 | 1.44 | 1.60 | 1.9 | 0.08 | 1 Up early and sustained |
| A014457_01 | At4g31510 | putative protein; protein id: At4g31510.1          | 0 | 1.26 | 1.29 | 1.8 | 0.23 | 1 Up early and sustained |
| A014519_01 | At4g04460 | putative aspartic protease; protein id: At4g044    | 0 | 1.77 | 2.27 | 2.5 | 0.05 | 1 Up early and sustained |
| A014539_01 | At4g16130 | galactokinase like protein; protein id: At4g161    | 0 | 1.04 | 1.04 | 1.5 | 0.60 | 1 Up early and sustained |
| A014646_01 | At4g11960 | putative protein; protein id: At4g11960.1          | 0 | 0.93 | 1.20 | 1.5 | 0.47 | 1 Up early and sustained |
| A014702_01 | At4g33050 | putative protein; protein id: At4g33050.1          | 0 | 2.32 | 2.98 | 3.4 | 0.05 | 1 Up early and sustained |
| A014758_01 | At4g35770 | senescence-associated protein sen1; protein id     | 0 | 3.33 | 2.36 | 2.3 | 0.05 | 1 Up early and sustained |
| A014765_01 | At4g17080 | hypothetical protein; protein id: At4g17080.1      | 0 | 1.01 | 1.32 | 2.1 | 0.05 | 1 Up early and sustained |
| A014769_01 | At4g02380 | coded for by A. thaliana cDNA T46835; protei       | 0 | 1.28 | 1.46 | 1.9 | 0.08 | 1 Up early and sustained |
| A014798_01 | At4g14430 | carnitine racemase like protein; protein id: At4   | 0 | 1.07 | 0.78 | 1.3 | 1.42 | 1 Up early and sustained |
| A014835_01 | At4g30630 | putative protein; protein id: At4g30630.1          | 0 | 0.77 | 1.00 | 1.9 | 0.11 | 1 Up early and sustained |
| A014855_01 | At4g34320 | hypothetical protein common family; protein id     | 0 | 2.41 | 1.97 | 2.0 | 0.08 | 1 Up early and sustained |
| A014858_01 | At4g33666 | expressed protein; protein id: At4g33666.1         | 0 | 1.86 | 2.27 | 3.6 | 0.05 | 1 Up early and sustained |
| A014892_01 | At4g37310 | cytochrome P450-like protein                       | 0 | 2.13 | 2.87 | 1.1 | 5.44 | 1 Up early and sustained |
| A014936_01 | At4g36410 | E2, ubiquitin-conjugating enzyme 17 (UBC17)        | 0 | 1.17 | 0.90 | 1.4 | 0.75 | 1 Up early and sustained |
| A014947_01 | At4g03510 | E3 ubiquitin ligase, RMA1; protein id: At4g035     | 0 | 1.61 | 1.50 | 2.5 | 0.05 | 1 Up early and sustained |
| A014984_01 | At4g05070 | coded for by A. thaliana cDNA T44741; protei       | 0 | 1.96 | 1.41 | 1.9 | 0.17 | 1 Up early and sustained |
| A015084_01 | At4g34390 | extra-large G-protein - like; protein id: At4g34   | 0 | 0.84 | 1.04 | 1.4 | 0.75 | 1 Up early and sustained |
| A015167_01 | At4g31390 | similar to putative ABC transporter; protein id:   | 0 | 1.47 | 1.70 | 1.3 | 1.42 | 1 Up early and sustained |
| A015260_01 | At4g16370 | isp4 like protein; protein id: At4g16370.1         | 0 | 0.94 | 1.10 | 1.5 | 0.47 | 1 Up early and sustained |
| A015267_01 | At4g16480 | membrane transporter like protein; protein id:     | 0 | 0.97 | 1.19 | 1.4 | 1.11 | 1 Up early and sustained |
| A015279_01 | At4g16690 | cyanohydrin lyase like protein; protein id: At4g   | 0 | 1.47 | 1.20 | 1.6 | 0.41 | 1 Up early and sustained |
| A015313_01 | At4g31240 | similar to putative receptor kinase; protein id: . | 0 | 1.17 | 1.34 | 1.4 | 0.75 | 1 Up early and sustained |
| A015336_01 | At4g32150 | synaptobrevin-like protein; protein id: At4g321    | 0 | 1.02 | 1.10 | 1.7 | 0.27 | 1 Up early and sustained |
| A015351_01 | At4g28240 | putative wound induced protein; protein id: At     | 0 | 1.53 | 1.74 | 1.7 | 0.27 | 1 Up early and sustained |
| A015543_01 | At5g13180 | NAM-like protein; protein id: At5g13180.1          | 0 | 1.61 | 2.14 | 2.1 | 0.08 | 1 Up early and sustained |
| A015558_01 | At5g10650 | Pspzf zinc finger protein - like; protein id: At5g | 0 | 2.78 | 2.60 | 2.5 | 0.05 | 1 Up early and sustained |

|            |           |                                                   |   |      |      |     |      |   |                        |
|------------|-----------|---------------------------------------------------|---|------|------|-----|------|---|------------------------|
| A015629_01 | At5g16370 | AMP-binding protein; protein id: At5g16370.1      | 0 | 1.85 | 1.38 | 1.9 | 0.17 | 1 | Up early and sustained |
| A015634_01 | At5g40780 | amino acid permease; protein id: At5g40780.1      | 0 | 1.95 | 1.78 | 2.2 | 0.05 | 1 | Up early and sustained |
| A015776_01 | At5g41350 | A.t. genomic DNA, chromosome 5, P1 clone:1        | 0 | 0.93 | 1.17 | 1.3 | 1.42 | 1 | Up early and sustained |
| A015866_01 | At5g22920 | PGPD14 protein; protein id: At5g22920.1           | 0 | 1.47 | 0.93 | 1.5 | 0.47 | 1 | Up early and sustained |
| A015879_01 | At5g57340 | expressed protein; protein id: At5g57340.1        | 0 | 1.72 | 1.06 | 1.8 | 0.17 | 1 | Up early and sustained |
| A016148_01 | At5g49360 | xylosidase glycosyl hydrolase family 3; protein   | 0 | 2.68 | 3.28 | 2.7 | 0.05 | 1 | Up early and sustained |
| A016244_01 | At5g16120 | lipase-like protein; protein id: At5g16120.1      | 0 | 1.41 | 1.31 | 2.7 | 0.05 | 1 | Up early and sustained |
| A016266_01 | At5g47050 | putative protein; protein id: At5g47050.1         | 0 | 1.19 | 1.62 | 1.8 | 0.19 | 1 | Up early and sustained |
| A016364_01 | At5g48180 | unknown protein                                   | 0 | 1.97 | 2.10 | 1.3 | 1.42 | 1 | Up early and sustained |
| A016369_01 | At5g49450 | bZIP family transcription factor; protein id: At5 | 0 | 2.02 | 2.06 | 3.5 | 0.05 | 1 | Up early and sustained |
| A016407_01 | At5g47070 | protein serine threonine kinase-like; protein id  | 0 | 1.01 | 0.94 | 1.5 | 0.60 | 1 | Up early and sustained |
| A016411_01 | At5g03180 | putative protein; protein id: At5g03180.1         | 0 | 1.50 | 1.79 | 2.2 | 0.05 | 1 | Up early and sustained |
| A016446_01 | At5g45890 | senescence-specific cysteine protease SAG1;       | 0 | 2.69 | 3.71 | 1.2 | 2.11 | 1 | Up early and sustained |
| A016597_01 | At5g01800 | putative protein; protein id: At5g01800.1         | 0 | 1.04 | 0.80 | 1.2 | 2.11 | 1 | Up early and sustained |
| A016682_01 | At5g54660 | expressed protein; protein id: At5g54660.1        | 0 | 1.42 | 1.85 | 1.9 | 0.17 | 1 | Up early and sustained |
| A016703_01 | At5g02970 | putative protein; protein id: At5g02970.1         | 0 | 1.13 | 1.58 | 2.4 | 0.05 | 1 | Up early and sustained |
| A016817_01 | At5g60680 | putative protein; protein id: At5g60680.1         | 0 | 1.60 | 1.17 | 2.2 | 0.05 | 1 | Up early and sustained |
| A017000_01 | At5g66930 | putative protein; protein id: At5g66930.1         | 0 | 1.09 | 1.13 | 2.2 | 0.05 | 1 | Up early and sustained |
| A017044_01 | At5g64840 | ABC transporter family protein; protein id: At5   | 0 | 1.47 | 1.72 | 1.4 | 1.11 | 1 | Up early and sustained |
| A017072_01 | At5g16110 | putative protein; protein id: At5g16110.1         | 0 | 1.84 | 1.08 | 1.1 | 5.44 | 1 | Up early and sustained |
| A017277_01 | At5g17860 | potassium-dependent sodium-calcium exchar         | 0 | 1.37 | 1.77 | 2.0 | 0.08 | 1 | Up early and sustained |
| A017284_01 | At5g40690 | putative protein; protein id: At5g40690.1         | 0 | 3.36 | 2.81 | 2.0 | 0.08 | 1 | Up early and sustained |
| A017387_01 | At5g45800 | leucine-rich repeat transmembrane protein kir     | 0 | 1.52 | 1.72 | 2.2 | 0.05 | 1 | Up early and sustained |
| A017468_01 | At5g25280 | serine-rich protein; protein id: At5g25280.1      | 0 | 2.35 | 2.14 | 2.3 | 0.05 | 1 | Up early and sustained |
| A017486_01 | At5g59030 | copper transport protein; protein id: At5g5903    | 0 | 0.92 | 1.07 | 1.7 | 0.36 | 1 | Up early and sustained |
| A017575_01 | At5g01850 | protein kinase ATN1-like protein; protein id: A   | 0 | 1.08 | 1.07 | 1.6 | 0.36 | 1 | Up early and sustained |
| A017595_01 | At5g01880 | putative protein; protein id: At5g01880.1         | 0 | 1.52 | 1.51 | 2.7 | 0.05 | 1 | Up early and sustained |
| A017640_01 | At5g57910 | putative protein; protein id: At5g57910.1         | 0 | 1.65 | 2.18 | 2.7 | 0.05 | 1 | Up early and sustained |
| A017656_01 | At5g45900 | AtAPG7; ubiquitin activating enzyme E1-like p     | 0 | 1.36 | 1.45 | 1.2 | 2.11 | 1 | Up early and sustained |
| A017664_01 | At5g46760 | bHLH protein; protein id: At5g46760.1             | 0 | 1.35 | 1.18 | 1.4 | 0.75 | 1 | Up early and sustained |
| A017758_01 | At5g11070 | putative protein; protein id: At5g11070.1         | 0 | 1.62 | 1.19 | 2.0 | 0.08 | 1 | Up early and sustained |
| A017783_01 | At5g06980 | expressed protein; protein id: At5g06980.1        | 0 | 1.29 | 1.58 | 1.8 | 0.23 | 1 | Up early and sustained |
| A017848_01 | At5g59960 | putative protein; protein id: At5g59960.1         | 0 | 1.61 | 1.38 | 1.6 | 0.36 | 1 | Up early and sustained |
| A017871_01 | At5g10830 | embryonic abundant protein -like; protein id: A   | 0 | 1.35 | 1.73 | 1.8 | 0.19 | 1 | Up early and sustained |
| A017890_01 | At5g23050 | acetyl-CoA synthetase-like protein; protein id:   | 0 | 1.26 | 1.23 | 1.3 | 1.42 | 1 | Up early and sustained |
| A017902_01 | At5g42050 | putative protein; protein id: At5g42050.1         | 0 | 0.87 | 1.19 | 1.6 | 0.36 | 1 | Up early and sustained |
| A017962_01 | At5g04720 | disease resistance protein (CC-NBS-LRR clas       | 0 | 0.88 | 1.14 | 1.4 | 0.75 | 1 | Up early and sustained |
| A017977_01 | At5g01520 | putative protein; protein id: At5g01520.1         | 0 | 2.58 | 3.31 | 5.3 | 0.05 | 1 | Up early and sustained |
| A018058_01 | At5g66170 | senescence-associated protein; protein id: At     | 0 | 1.92 | 1.54 | 2.5 | 0.05 | 1 | Up early and sustained |
| A018066_01 | At5g61820 | putative protein; protein id: At5g61820.1         | 0 | 1.98 | 2.75 | 2.8 | 0.05 | 1 | Up early and sustained |
| A018070_01 | At5g47540 | putative protein; protein id: At5g47540.1         | 0 | 1.10 | 1.34 | 1.7 | 0.36 | 1 | Up early and sustained |
| A018110_01 | At5g59960 | putative protein; protein id: At5g59960.1         | 0 | 1.46 | 1.66 | 1.9 | 0.11 | 1 | Up early and sustained |
| A018147_01 | At5g54170 | membrane related protein-like; protein id: At5    | 0 | 1.41 | 1.54 | 2.5 | 0.05 | 1 | Up early and sustained |
| A018153_01 | At5g21020 | putative protein; protein id: At5g21020.1         | 0 | 1.37 | 1.59 | 2.0 | 0.08 | 1 | Up early and sustained |
| A018157_01 | At5g62540 | ubiquitin-conjugating enzyme E2-17 kd 3ubiqu      | 0 | 1.53 | 1.06 | 2.1 | 0.08 | 1 | Up early and sustained |

|            |           |                                                    |   |      |      |     |      |                          |
|------------|-----------|----------------------------------------------------|---|------|------|-----|------|--------------------------|
| A018159_01 | At5g24160 | squalene monooxygenase 1,2 (squalene epo           | 0 | 2.55 | 2.92 | 3.4 | 0.05 | 1 Up early and sustained |
| A018195_01 | At5g51970 | sorbitol dehydrogenase-like protein; protein id    | 0 | 1.11 | 1.20 | 1.7 | 0.23 | 1 Up early and sustained |
| A018264_01 | At5g05930 | expressed protein; protein id: At5g05930.1         | 0 | 1.06 | 1.14 | 2.4 | 0.05 | 1 Up early and sustained |
| A018267_01 | At5g25220 | KNAT3 homeodomain protein; protein id: At5g        | 0 | 1.03 | 1.19 | 1.8 | 0.17 | 1 Up early and sustained |
| A018348_01 | At5g56550 | putative protein; protein id: At5g56550.1          | 0 | 2.37 | 2.14 | 2.5 | 0.05 | 1 Up early and sustained |
| A018427_01 | At5g59400 | putative protein; protein id: At5g59400.2          | 0 | 1.06 | 1.47 | 1.9 | 0.08 | 1 Up early and sustained |
| A018531_01 | At5g59750 | GTP cyclohydrolase II / 3,4-dihydroxy-2-butan      | 0 | 1.18 | 1.47 | 1.5 | 0.60 | 1 Up early and sustained |
| A018637_01 | At5g52630 | selenium-binding protein-like; protein id: At5g    | 0 | 1.32 | 1.47 | 2.4 | 0.05 | 1 Up early and sustained |
| A018818_01 | At5g41700 | E2, ubiquitin-conjugating enzyme 8 (UBC8); p       | 0 | 0.77 | 1.07 | 1.4 | 0.75 | 1 Up early and sustained |
| A018925_01 | At5g46180 | ornithine aminotransferase; protein id: At5g46     | 0 | 0.84 | 1.13 | 1.5 | 0.60 | 1 Up early and sustained |
| A018949_01 | At5g22270 | putative protein; protein id: At5g22270.1          | 0 | 1.73 | 1.53 | 2.1 | 0.05 | 1 Up early and sustained |
| A018964_01 | At5g56180 | putative protein; protein id: At5g56180.1          | 0 | 1.01 | 1.13 | 1.4 | 0.75 | 1 Up early and sustained |
| A019174_01 | At5g54730 | putative protein; protein id: At5g54730.1          | 0 | 1.89 | 2.43 | 2.8 | 0.05 | 1 Up early and sustained |
| A019247_01 | At5g06860 | polygalacturonase inhibiting protein (PGIP1); p    | 0 | 1.53 | 1.79 | 2.0 | 0.08 | 1 Up early and sustained |
| A019466_01 | At5g54250 | cyclic nucleotide-regulated ion channel (CNGC      | 0 | 1.40 | 1.52 | 1.7 | 0.23 | 1 Up early and sustained |
| A019544_01 | At4g25170 | putative protein; protein id: At4g25170.1          | 0 | 1.76 | 1.08 | 1.6 | 0.36 | 1 Up early and sustained |
| A019617_01 | At5g04770 | amino acid transport - like protein; protein id: / | 0 | 1.05 | 0.77 | 1.3 | 1.42 | 1 Up early and sustained |
| A019659_01 | At5g51640 | putative protein; protein id: At5g51640.1          | 0 | 1.13 | 1.14 | 1.7 | 0.23 | 1 Up early and sustained |
| A019668_01 | At3g19030 | expressed protein; protein id: At3g19030.1         | 0 | 1.81 | 2.17 | 2.8 | 0.05 | 1 Up early and sustained |
| A019724_01 | At5g44580 | expressed protein; protein id: At5g44580.1         | 0 | 1.81 | 2.30 | 2.5 | 0.05 | 1 Up early and sustained |
| A019812_01 | At3g51860 | Ca2+/H+-exchanging protein-like; protein id: /     | 0 | 1.90 | 2.63 | 2.3 | 0.05 | 1 Up early and sustained |
| A019874_01 | At2g01890 | putative purple acid phosphatase; protein id: /    | 0 | 3.08 | 3.65 | 3.2 | 0.05 | 1 Up early and sustained |
| A019954_01 | At1g71040 | spore coat protein-like protein; protein id: At1g  | 0 | 1.45 | 1.82 | 3.1 | 0.05 | 1 Up early and sustained |
| A020009_01 | At5g07220 | putative protein; protein id: At5g07220.1          | 0 | 1.23 | 1.65 | 1.7 | 0.27 | 1 Up early and sustained |
| A020064_01 | At4g24570 | mitochondrial carrier protein family; protein id:  | 0 | 1.13 | 1.21 | 1.6 | 0.41 | 1 Up early and sustained |
| A020102_01 | At5g02840 | myb family transcription factor; protein id: At5g  | 0 | 1.07 | 1.08 | 1.9 | 0.11 | 1 Up early and sustained |
| A020109_01 | At1g50290 | expressed protein; protein id: At1g50290.1         | 0 | 1.30 | 0.86 | 1.3 | 1.11 | 1 Up early and sustained |
| A020144_01 | At1g68440 | expressed protein; protein id: At1g68440.1         | 0 | 1.49 | 0.91 | 1.5 | 0.75 | 1 Up early and sustained |
| A020145_01 | xxxx      | No hits found                                      | 0 | 1.56 | 1.22 | 1.6 | 0.47 | 1 Up early and sustained |
| A020172_01 | At2g01450 | putative MAP kinase; protein id: At2g01450.1       | 0 | 0.94 | 1.33 | 2.4 | 0.05 | 1 Up early and sustained |
| A020189_01 | At3g16857 | ARR1 protein, putative; protein id: At3g16857.     | 0 | 1.23 | 1.44 | 2.2 | 0.05 | 1 Up early and sustained |
| A020214_01 | At3g47960 | putative peptide transporter; protein id: At3g47   | 0 | 1.07 | 0.77 | 1.1 | 5.44 | 1 Up early and sustained |
| A020221_01 | At3g10740 | glycosyl hydrolase family 51; protein id: At3g1    | 0 | 2.17 | 2.15 | 2.7 | 0.05 | 1 Up early and sustained |
| A020290_01 | At4g17940 | putative protein; protein id: At4g17940.1          | 0 | 0.89 | 1.19 | 1.3 | 1.42 | 1 Up early and sustained |
| A020344_01 | At2g29420 | glutathione transferase, putative; protein id: At  | 0 | 1.27 | 1.43 | 1.5 | 0.47 | 1 Up early and sustained |
| A020350_01 | At3g15500 | putative jasmonic acid regulatory protein; prot    | 0 | 2.75 | 2.98 | 1.9 | 0.11 | 1 Up early and sustained |
| A020460_01 | At4g16670 | hypothetical protein; protein id: At4g16670.1      | 0 | 1.82 | 1.40 | 1.8 | 0.23 | 1 Up early and sustained |
| A020482_01 | At2g23810 | hypothetical protein; protein id: At2g23810.1      | 0 | 1.19 | 0.98 | 1.6 | 0.41 | 1 Up early and sustained |
| A020515_01 | At5g58350 | MAP kinase; protein id: At5g58350.1                | 0 | 1.86 | 2.04 | 2.2 | 0.05 | 1 Up early and sustained |
| A020530_01 | At1g29240 | unknown protein; protein id: At1g29240.1           | 0 | 1.25 | 1.75 | 2.1 | 0.05 | 1 Up early and sustained |
| A020564_01 | At1g27290 | expressed protein; protein id: At1g27290.1         | 0 | 1.21 | 0.95 | 1.6 | 0.41 | 1 Up early and sustained |
| A020580_01 | At4g34230 | cinnamyl alcohol dehydrogenase - like protein      | 0 | 2.16 | 1.77 | 1.9 | 0.11 | 1 Up early and sustained |
| A020617_01 | At1g54100 | aldehyde dehydrogenase homolog, putative; p        | 0 | 2.07 | 1.89 | 2.7 | 0.05 | 1 Up early and sustained |
| A020633_01 | At4g36040 | DnaJ-like protein; protein id: At4g36040.1         | 0 | 1.51 | 1.69 | 1.6 | 0.47 | 1 Up early and sustained |
| A020645_01 | At2g01490 | expressed protein; protein id: At2g01490.1         | 0 | 1.35 | 1.18 | 1.7 | 0.27 | 1 Up early and sustained |

|            |               |                                                   |   |      |      |     |      |                          |
|------------|---------------|---------------------------------------------------|---|------|------|-----|------|--------------------------|
| A020654_01 | At1g49050     | expressed protein; protein id: At1g49050.1        | 0 | 1.08 | 1.41 | 2.0 | 0.08 | 1 Up early and sustained |
| A020686_01 | At2g36630     | unknown protein; protein id: At2g36630.1          | 0 | 1.60 | 1.03 | 1.7 | 0.23 | 1 Up early and sustained |
| A020731_01 | At2g40000     | putative nematode-resistance protein; protein     | 0 | 3.31 | 2.60 | 1.7 | 0.23 | 1 Up early and sustained |
| A020741_01 | At4g26080     | protein phosphatase ABI1; protein id: At4g260     | 0 | 1.19 | 1.38 | 1.8 | 0.23 | 1 Up early and sustained |
| A020748_01 | At2g05540     | putative glycine-rich protein; protein id: At2g05 | 0 | 3.75 | 2.70 | 2.7 | 0.05 | 1 Up early and sustained |
| A020751_01 | not annotated | Chr1 W/25637330-25637399                          | 0 | 1.27 | 1.43 | 1.6 | 0.47 | 1 Up early and sustained |
| A020795_01 | At1g72150     | cytosolic factor, putative; protein id: At1g7215  | 0 | 1.32 | 1.65 | 2.0 | 0.08 | 1 Up early and sustained |
| A020803_01 | At4g37520     | peroxidase, putative; protein id: At4g37520.1     | 0 | 2.11 | 2.49 | 3.4 | 0.05 | 1 Up early and sustained |
| A020816_01 | At2g22300     | ethylene-induced calmodulin-binding protein, p    | 0 | 0.87 | 1.19 | 1.3 | 1.42 | 1 Up early and sustained |
| A020828_01 | At3g19580     | zinc finger protein, putative; protein id: At3g19 | 0 | 1.75 | 2.28 | 2.0 | 0.08 | 1 Up early and sustained |
| A020836_01 | At1g05010     | 1-aminocyclopropane-1-carboxylate oxidase; p      | 0 | 1.78 | 1.79 | 1.7 | 0.23 | 1 Up early and sustained |
| A020847_01 | At1g10070     | tat-binding protein, putative; protein id: At1g10 | 0 | 3.25 | 2.18 | 2.6 | 0.05 | 1 Up early and sustained |
| A020869_01 | At5g54080     | homogentisate 1,2-dioxygenase; protein id: At     | 0 | 2.03 | 2.18 | 2.4 | 0.05 | 1 Up early and sustained |
| A020873_01 | At3g21670     | nitrate transporter; protein id: At3g21670.1      | 0 | 1.22 | 1.01 | 1.4 | 0.75 | 1 Up early and sustained |
| A020955_01 | At2g16700     | actin depolymerizing factor 5; protein id: At2g1  | 0 | 1.40 | 1.65 | 2.0 | 0.08 | 1 Up early and sustained |
| A020958_01 | At1g53580     | glyoxalase II, putative (hydroxyacylglutathione   | 0 | 1.81 | 1.89 | 2.3 | 0.05 | 1 Up early and sustained |
| A021035_01 | At5g63190     | topoisomerase, putative; protein id: At5g6319     | 0 | 1.36 | 1.32 | 2.2 | 0.05 | 1 Up early and sustained |
| A021065_01 | At2g37130     | peroxidase, putative (ATP2a); protein id: At2g    | 0 | 1.99 | 1.78 | 2.4 | 0.05 | 1 Up early and sustained |
| A021067_01 | At1g69890     | expressed protein; protein id: At1g69890.1        | 0 | 2.03 | 1.47 | 2.5 | 0.05 | 1 Up early and sustained |
| A021079_01 | At1g10150     | expressed protein; protein id: At1g10150.1        | 0 | 1.17 | 1.46 | 1.6 | 0.36 | 1 Up early and sustained |
| A021085_01 | At5g26340     | hexose transporter - like protein; protein id: At | 0 | 1.53 | 1.27 | 1.9 | 0.11 | 1 Up early and sustained |
| A021093_01 | At4g20260     | endomembrane-associated protein; protein id       | 0 | 1.77 | 1.97 | 1.6 | 0.47 | 1 Up early and sustained |
| A021130_01 | At1g09070     | expressed protein; protein id: At1g09070.1        | 0 | 1.09 | 1.13 | 1.5 | 0.60 | 1 Up early and sustained |
| A021335_01 | At4g15700     | glutaredoxin homolog; protein id: At4g15700.1     | 0 | 1.51 | 1.84 | 2.0 | 0.08 | 1 Up early and sustained |
| A021441_01 | At5g59840     | GTP-binding protein ara-3; protein id: At5g598    | 0 | 0.95 | 1.23 | 1.8 | 0.19 | 1 Up early and sustained |
| A021628_01 | At2g32190     | expressed protein; protein id: At2g32190.1        | 0 | 1.93 | 1.36 | 1.5 | 0.47 | 1 Up early and sustained |
| A021629_01 | At2g32210     | expressed protein; protein id: At2g32210.1        | 0 | 2.26 | 2.10 | 2.5 | 0.05 | 1 Up early and sustained |
| A021719_01 | At2g01890     | putative purple acid phosphatase; protein id: A   | 0 | 3.47 | 4.09 | 1.3 | 1.42 | 1 Up early and sustained |
| A021759_01 | At1g70680     | Ca2+-binding EF-hand common family protei         | 0 | 3.08 | 2.74 | 2.2 | 0.05 | 1 Up early and sustained |
| A021811_01 | At1g80920     | J8-like protein; protein id: At1g80920.1          | 0 | 2.18 | 2.97 | 2.9 | 0.05 | 1 Up early and sustained |
| A021814_01 | At2g43820     | putative glucosyltransferase; protein id: At2g4   | 0 | 2.09 | 2.92 | 2.9 | 0.05 | 1 Up early and sustained |
| A021851_01 | At5g44580     | expressed protein; protein id: At5g44580.1        | 0 | 1.93 | 2.41 | 2.8 | 0.05 | 1 Up early and sustained |
| A021867_01 | At2g40110     | unknown protein; protein id: At2g40110.1          | 0 | 0.88 | 1.13 | 1.4 | 0.75 | 1 Up early and sustained |
| A021890_01 | At4g11360     | RING-H2 finger protein RHA1b; protein id: At4     | 0 | 2.29 | 1.71 | 2.4 | 0.05 | 1 Up early and sustained |
| A021921_01 | At4g38540     | monooxygenase 2 (MO2); protein id: At4g385        | 0 | 3.08 | 3.86 | 1.3 | 1.11 | 1 Up early and sustained |
| A022019_01 | At3g48690     | putative protein; protein id: At3g48690.1         | 0 | 1.08 | 1.04 | 2.0 | 0.08 | 1 Up early and sustained |
| A022125_01 | At1g13080     | cytochrome p450 family; protein id: At1g1308      | 0 | 1.01 | 1.39 | 2.2 | 0.05 | 1 Up early and sustained |
| A022126_01 | At3g23000     | SNF1 related protein kinase (ATSRPK1); prot       | 0 | 1.66 | 1.43 | 1.4 | 1.11 | 1 Up early and sustained |
| A022377_01 | At4g19860     | putative protein; protein id: At4g19860.1         | 0 | 0.94 | 1.21 | 1.8 | 0.19 | 1 Up early and sustained |
| A022397_01 | At4g21350     | putative protein; protein id: At4g21350.1         | 0 | 0.76 | 1.06 | 1.1 | 5.44 | 1 Up early and sustained |
| A022401_01 | At4g23400     | water channel - like protein; protein id: At4g23  | 0 | 1.71 | 2.42 | 2.7 | 0.05 | 1 Up early and sustained |
| A022555_01 | At4g02860     | putative protein; protein id: At4g02860.1         | 0 | 1.11 | 1.20 | 1.7 | 0.27 | 1 Up early and sustained |
| A022735_01 | At3g31390     | hypothetical protein; protein id: At3g31390.1     | 0 | 1.88 | 2.31 | 1.8 | 0.19 | 1 Up early and sustained |
| A022781_01 | At3g17700     | cyclic nucleotide-binding transporter 1 (CNBT     | 0 | 0.84 | 1.01 | 1.2 | 2.11 | 1 Up early and sustained |
| A022927_01 | At5g44290     | cyclin-dependent protein kinase-like protein; p   | 0 | 1.05 | 1.43 | 2.1 | 0.08 | 1 Up early and sustained |

|            |           |                                                  |   |      |      |     |      |   |                        |
|------------|-----------|--------------------------------------------------|---|------|------|-----|------|---|------------------------|
| A023119_01 | At5g63970 | putative protein; protein id: At5g63970.1        | 0 | 0.91 | 1.01 | 1.3 | 1.42 | 1 | Up early and sustained |
| A023329_01 | At3g46530 | disease resistance protein, RPP13-like (CC-N     | 0 | 1.12 | 1.44 | 2.7 | 0.05 | 1 | Up early and sustained |
| A023353_01 | At2g17110 | expressed protein; protein id: At2g17110.1       | 0 | 1.00 | 1.35 | 2.2 | 0.05 | 1 | Up early and sustained |
| A023537_01 | At2g36800 | putative glucosyl transferase; protein id: At2g3 | 0 | 2.04 | 2.73 | 1.1 | 5.44 | 1 | Up early and sustained |
| A023658_01 | At2g36080 | putative DNA-binding protein RAV2; protein id    | 0 | 1.49 | 0.95 | 1.9 | 0.08 | 1 | Up early and sustained |
| A024219_01 | At5g57710 | 101 kDa heat shock protein; HSP101-like prot     | 0 | 1.28 | 1.07 | 1.5 | 0.60 | 1 | Up early and sustained |
| A024249_01 | At2g40140 | putative CCCH-type zinc finger protein; protei   | 0 | 1.30 | 1.39 | 2.0 | 0.08 | 1 | Up early and sustained |
| A024298_01 | At4g30270 | xyloglucan endotransglycosylase (meri5B); pr     | 0 | 2.87 | 3.56 | 3.2 | 0.05 | 1 | Up early and sustained |
| A024299_01 | At3g12020 | kinesin-related protein; protein id: At3g12020.  | 0 | 1.50 | 2.03 | 3.1 | 0.05 | 1 | Up early and sustained |
| A024349_01 | At1g72900 | disease resistance protein (TIR-NBS class), p    | 0 | 1.92 | 1.89 | 1.6 | 0.47 | 1 | Up early and sustained |
| A024350_01 | At1g62570 | flavin-containing monooxygenase, putative; pr    | 0 | 1.35 | 1.37 | 1.5 | 0.60 | 1 | Up early and sustained |
| A024396_01 | At1g55960 | membrane related protein CP5, putative; prote    | 0 | 1.30 | 1.39 | 1.8 | 0.19 | 1 | Up early and sustained |
| A024399_01 | At3g14270 | unknown protein; protein id: At3g14270.1         | 0 | 1.09 | 1.09 | 1.1 | 5.44 | 1 | Up early and sustained |
| A024456_01 | At1g58032 | hypothetical protein; protein id: At1g58032.1    | 0 | 1.32 | 0.84 | 1.1 | 5.44 | 1 | Up early and sustained |
| A024495_01 | At2g27500 | glycosyl hydrolase family 17; protein id: At2g2  | 0 | 2.05 | 2.55 | 1.2 | 2.11 | 1 | Up early and sustained |
| A024544_01 | At5g02260 | expansin, putative; protein id: At5g02260.1      | 0 | 0.83 | 1.11 | 1.5 | 0.75 | 1 | Up early and sustained |
| A024559_01 | At1g42550 | unknown protein; protein id: At1g42550.1         | 0 | 1.14 | 1.39 | 2.3 | 0.05 | 1 | Up early and sustained |
| A024560_01 | At5g61600 | DNA binding protein - like; protein id: At5g616  | 0 | 2.23 | 2.06 | 3.2 | 0.05 | 1 | Up early and sustained |
| A024578_01 | At3g17810 | dehydrogenase, putative; protein id: At3g1781    | 0 | 1.52 | 1.71 | 1.6 | 0.47 | 1 | Up early and sustained |
| A024599_01 | At2g25080 | glutathione peroxidase, putative; protein id: At | 0 | 1.61 | 1.42 | 1.7 | 0.23 | 1 | Up early and sustained |
| A024636_01 | At1g23310 | putative alanine aminotransferase; protein id:   | 0 | 1.36 | 1.64 | 1.7 | 0.23 | 1 | Up early and sustained |
| A024642_01 | At2g01420 | PIN4; putative auxin transport protein; protein  | 0 | 1.03 | 1.17 | 1.6 | 0.36 | 1 | Up early and sustained |
| A024665_01 | At5g58800 | quinone reductase family; protein id: At5g5880   | 0 | 1.08 | 1.05 | 1.9 | 0.11 | 1 | Up early and sustained |
| A024676_01 | At4g04620 | AtAPG8b; putative symbiosis-related protein;     | 0 | 1.11 | 1.43 | 2.3 | 0.05 | 1 | Up early and sustained |
| A025036_01 | At3g62740 | glycosyl hydrolase family 1; protein id: At3g62  | 0 | 1.20 | 1.34 | 1.5 | 0.60 | 1 | Up early and sustained |
| A025274_01 | At3g51430 | strictosidine synthase-related; protein id: At3g | 0 | 1.54 | 1.71 | 2.2 | 0.05 | 1 | Up early and sustained |
| A025403_01 | At2g29340 | putative tropinone reductase; protein id: At2g2  | 0 | 1.12 | 0.67 | 1.3 | 1.42 | 1 | Up early and sustained |
| A025408_01 | At2g22920 | putative serine carboxypeptidase I; protein id:  | 0 | 1.35 | 1.89 | 2.1 | 0.08 | 1 | Up early and sustained |
| A025585_01 | At1g63370 | flavin-binding monooxygenase, putative; prote    | 0 | 1.23 | 1.02 | 1.6 | 0.36 | 1 | Up early and sustained |
| A025644_01 | At1g56280 | expressed protein; protein id: At1g56280.1       | 0 | 1.06 | 0.76 | 1.2 | 2.11 | 1 | Up early and sustained |
| A025759_01 | At2g22980 | putative serine carboxypeptidase I; protein id:  | 0 | 2.32 | 1.48 | 1.4 | 1.11 | 1 | Up early and sustained |
| A025777_01 | At4g34030 | putative protein; protein id: At4g34030.1        | 0 | 1.65 | 1.39 | 1.6 | 0.36 | 1 | Up early and sustained |
| A025798_01 | At1g12780 | uridine diphosphate glucose epimerase; prote     | 0 | 2.43 | 1.48 | 2.0 | 0.08 | 1 | Up early and sustained |
| A025909_01 | At2g26740 | epoxide hydrolase (ATsEH); protein id: At2g26    | 0 | 0.83 | 1.08 | 1.4 | 1.11 | 1 | Up early and sustained |
| A025924_01 | At4g30470 | cinnamoyl-CoA reductase - like protein; protei   | 0 | 1.65 | 1.93 | 2.2 | 0.05 | 1 | Up early and sustained |
| A025944_01 | At5g43060 | cysteine protease component of protease-inhibi   | 0 | 1.28 | 0.73 | 1.9 | 0.11 | 1 | Up early and sustained |
| A025995_01 | At2g01670 | expressed protein; protein id: At2g01670.1       | 0 | 1.04 | 0.99 | 1.7 | 0.36 | 1 | Up early and sustained |
| A025997_01 | At3g26180 | cytochrome p450 family; protein id: At3g26180    | 0 | 1.58 | 1.33 | 1.3 | 1.11 | 1 | Up early and sustained |
| A025998_01 | At1g02300 | cathepsin B-like cysteine protease, putative; p  | 0 | 1.65 | 1.43 | 1.5 | 0.60 | 1 | Up early and sustained |
| A006359_01 | At2g36330 | hypothetical protein; protein id: At2g36330.1    | 0 | 0.88 | 1.05 | 1.4 | 0.75 | 1 | Up early and sustained |
| A006584_01 | At2g07330 | mutator-like transposase; protein id: At2g0733   | 0 | 1.07 | 1.45 | 1.2 | 2.11 | 1 | Up early and sustained |
| A008712_01 | At2g31945 | expressed protein; protein id: At2g31945.1       | 0 | 3.19 | 2.31 | 1.9 | 0.11 | 1 | Up early and sustained |
| A014327_01 | At4g25390 | receptor kinase-like protein; protein id: At4g25 | 0 | 1.93 | 2.55 | 2.4 | 0.05 | 1 | Up early and sustained |
| A016963_01 | At5g05140 | putative protein; protein id: At5g05140.1        | 0 | 1.05 | 0.88 | 1.6 | 0.41 | 1 | Up early and sustained |
| A021199_01 | At3g24420 | unknown protein; protein id: At3g24420.1         | 0 | 1.25 | 1.75 | 1.6 | 0.36 | 1 | Up early and sustained |

|            |           |                                                   |   |      |      |     |      |                          |
|------------|-----------|---------------------------------------------------|---|------|------|-----|------|--------------------------|
| A006010_01 | At2g37130 | peroxidase, putative (ATP2a); protein id: At2g    | 0 | 3.29 | 3.32 | 3.4 | 0.05 | 1 Up early and sustained |
| A007301_01 | At2g26670 | heme oxygenase 1 (HO1); protein id: At2g266       | 0 | 1.51 | 1.34 | 1.6 | 0.41 | 1 Up early and sustained |
| A011737_01 | At3g57530 | calcium-dependent protein kinase; protein id:     | 0 | 1.02 | 1.08 | 1.6 | 0.41 | 1 Up early and sustained |
| A012405_01 | At3g11020 | DRE binding protein (DREB2B); protein id: At      | 0 | 0.87 | 1.11 | 1.6 | 0.47 | 1 Up early and sustained |
| A012825_01 | At3g29240 | chloroplast lumen common protein family; pro      | 0 | 1.52 | 1.37 | 2.7 | 0.05 | 1 Up early and sustained |
| A014791_01 | At4g27450 | unknown protein; protein id: At4g27450            | 0 | 2.76 | 2.98 | 3.2 | 0.05 | 1 Up early and sustained |
| A014967_01 | At4g23900 | expressed protein; protein id: At4g23900.1        | 0 | 1.77 | 1.02 | 1.9 | 0.11 | 1 Up early and sustained |
| A024776_01 | At4g15545 | expressed protein; protein id: At4g15545.1        | 0 | 0.90 | 1.06 | 1.5 | 0.47 | 1 Up early and sustained |
| A025167_01 | At3g14640 | cytochrome P450, putative; protein id: At3g14     | 0 | 1.10 | 1.25 | 1.3 | 1.11 | 1 Up early and sustained |
| A006161_01 | At2g43820 | putative glucosyltransferase; protein id: At2g4   | 0 | 2.19 | 2.65 | 1.2 | 2.11 | 1 Up early and sustained |
| A000063_01 | At1g76560 | expressed protein; protein id: At1g76560.1        | 0 | 0.81 | 1.27 | 2.0 | 0.08 | 2 Up progressive         |
| A000065_01 | At1g68110 | expressed protein; protein id: At1g68110.1        | 0 | 0.37 | 1.21 | 1.4 | 0.75 | 2 Up progressive         |
| A000220_01 | At1g27000 | bZIP family transcription factor; protein id: At1 | 0 | 0.46 | 1.22 | 1.2 | 2.11 | 2 Up progressive         |
| A000489_01 | At1g03550 | expressed protein; protein id: At1g03550.1        | 0 | 0.70 | 1.85 | 2.6 | 0.05 | 2 Up progressive         |
| A000567_01 | At1g22190 | AP2 domain transcription factor RAP2, putativ     | 0 | 1.28 | 1.99 | 2.5 | 0.05 | 2 Up progressive         |
| A000582_01 | At1g09430 | unknown protein; protein id: At1g09430.1          | 0 | 0.86 | 1.68 | 2.7 | 0.05 | 2 Up progressive         |
| A000619_01 | At1g64360 | expressed protein; protein id: At1g64360.1        | 0 | 1.50 | 5.28 | 2.3 | 0.05 | 2 Up progressive         |
| A000653_01 | At1g11530 | thioredoxin h, putative; protein id: At1g11530.   | 0 | 1.23 | 1.90 | 2.6 | 0.05 | 2 Up progressive         |
| A000696_01 | At1g68830 | putative protein kinase; protein id: At1g68830.   | 0 | 0.67 | 2.17 | 2.9 | 0.05 | 2 Up progressive         |
| A000722_01 | At1g15415 | hypothetical protein; protein id: At1g15415.1     | 0 | 0.33 | 1.07 | 1.8 | 0.19 | 2 Up progressive         |
| A000731_01 | At1g21640 | expressed protein; protein id: At1g21640.1        | 0 | 1.21 | 2.34 | 1.2 | 2.11 | 2 Up progressive         |
| A001086_01 | At1g60940 | putative serine/threonine-protein kinase; prote   | 0 | 0.41 | 1.37 | 2.4 | 0.05 | 2 Up progressive         |
| A001142_01 | At1g44820 | aminoacylase, putative; protein id: At1g44820     | 0 | 0.55 | 1.14 | 1.6 | 0.41 | 2 Up progressive         |
| A001154_01 | At1g21780 | unknown protein; protein id: At1g21780.1          | 0 | 0.78 | 1.28 | 2.1 | 0.08 | 2 Up progressive         |
| A001188_01 | At1g22710 | putative sucrose transport protein, SUC2; prot    | 0 | 0.51 | 1.65 | 2.2 | 0.05 | 2 Up progressive         |
| A001199_01 | At1g07010 | unknown protein; protein id: At1g07010.1          | 0 | 0.48 | 1.11 | 1.3 | 1.11 | 2 Up progressive         |
| A001227_01 | At1g78280 | unknown protein; protein id: At1g78280.1          | 0 | 0.46 | 1.03 | 1.5 | 0.60 | 2 Up progressive         |
| A001263_01 | At1g20380 | prolyl endopeptidase, putative; protein id: At1g  | 0 | 0.66 | 1.16 | 1.1 | 5.44 | 2 Up progressive         |
| A001285_01 | At1g50020 | tubulin alpha-6 chain, putative; protein id: At1g | 0 | 1.01 | 1.62 | 2.2 | 0.05 | 2 Up progressive         |
| A001299_01 | At1g07600 | metallothionein-like protein; protein id: At1g07  | 0 | 1.07 | 2.98 | 2.7 | 0.05 | 2 Up progressive         |
| A001308_01 | At1g01725 | expressed protein; protein id: At1g01725.1        | 0 | 0.57 | 1.05 | 1.7 | 0.27 | 2 Up progressive         |
| A001339_01 | At1g02860 | expressed protein; protein id: At1g02860.1        | 0 | 1.00 | 2.03 | 2.7 | 0.05 | 2 Up progressive         |
| A001375_01 | At1g02790 | polygalacturonase, putative; protein id: At1g02   | 0 | 0.34 | 1.03 | 1.2 | 2.11 | 2 Up progressive         |
| A001392_01 | At1g19660 | expressed protein; protein id: At1g19660.1        | 0 | 1.30 | 2.12 | 2.9 | 0.05 | 2 Up progressive         |
| A001435_01 | At1g62510 | similar to 14KD proline-rich protein DC2.15 pr    | 0 | 0.87 | 1.86 | 2.1 | 0.05 | 2 Up progressive         |
| A001441_01 | At1g50250 | chloroplast FtsH protease; protein id: At1g502    | 0 | 0.70 | 1.51 | 2.4 | 0.05 | 2 Up progressive         |
| A001472_01 | At1g26920 | expressed protein; protein id: At1g26920.1        | 0 | 0.94 | 1.98 | 2.7 | 0.05 | 2 Up progressive         |
| A001671_01 | At1g27980 | sphingosine-1-phosphate lyase, putative; prot     | 0 | 1.68 | 2.44 | 2.4 | 0.05 | 2 Up progressive         |
| A001697_01 | At1g77450 | GRAB1-like protein; protein id: At1g77450.1       | 0 | 0.90 | 2.28 | 2.1 | 0.05 | 2 Up progressive         |
| A001773_01 | At1g70530 | putative protein kinase; protein id: At1g70530.   | 0 | 1.14 | 1.70 | 3.0 | 0.05 | 2 Up progressive         |
| A001801_01 | At1g68190 | CONSTANS B-box zinc finger family protein; p      | 0 | 0.82 | 1.26 | 1.9 | 0.17 | 2 Up progressive         |
| A001880_01 | At1g76600 | expressed protein; protein id: At1g76600.1        | 0 | 1.04 | 1.75 | 1.1 | 5.44 | 2 Up progressive         |
| A001917_01 | At1g71697 | choline kinase, putative; protein id: At1g71697   | 0 | 0.72 | 1.75 | 2.1 | 0.05 | 2 Up progressive         |
| A002009_01 | At1g28140 | expressed protein; protein id: At1g28140.1        | 0 | 0.38 | 1.02 | 2.2 | 0.05 | 2 Up progressive         |
| A002031_01 | At1g30820 | CTP synthase-like protein; protein id: At1g308    | 0 | 0.70 | 1.19 | 1.8 | 0.19 | 2 Up progressive         |

|            |           |                                                                              |   |      |      |     |      |                  |
|------------|-----------|------------------------------------------------------------------------------|---|------|------|-----|------|------------------|
| A002050_01 | At1g07200 | unknown protein; protein id: At1g07200.1                                     | 0 | 0.82 | 1.47 | 2.3 | 0.05 | 2 Up progressive |
| A002065_01 | At1g72030 | unknown protein; protein id: At1g72030.1                                     | 0 | 0.71 | 1.21 | 2.1 | 0.08 | 2 Up progressive |
| A002073_01 | At1g47128 | cysteine proteinase RD21A; protein id: At1g47128.1                           | 0 | 1.47 | 2.12 | 2.0 | 0.08 | 2 Up progressive |
| A002120_01 | At1g48300 | hypothetical protein; protein id: At1g48300.1                                | 0 | 1.00 | 2.13 | 3.0 | 0.05 | 2 Up progressive |
| A002149_01 | At1g04580 | putative aldehyde oxidase; protein id: At1g04580.1                           | 0 | 1.71 | 3.71 | 1.6 | 0.41 | 2 Up progressive |
| A002160_01 | At1g72830 | CCAAT-binding factor B subunit homolog, putative; protein id: At1g72830.1    | 0 | 0.61 | 1.14 | 1.8 | 0.19 | 2 Up progressive |
| A002220_01 | At1g62370 | hypothetical protein; protein id: At1g62370.1                                | 0 | 1.38 | 1.99 | 2.2 | 0.05 | 2 Up progressive |
| A002294_01 | At1g20470 | hypothetical protein; protein id: At1g20470.1                                | 0 | 0.82 | 1.68 | 1.2 | 2.11 | 2 Up progressive |
| A002672_01 | At1g20670 | hypothetical protein; protein id: At1g20670.1                                | 0 | 0.31 | 1.00 | 1.5 | 0.60 | 2 Up progressive |
| A002702_01 | At1g15100 | putative RING-H2 zinc finger protein; protein id: At1g15100.1                | 0 | 0.77 | 1.59 | 1.8 | 0.17 | 2 Up progressive |
| A002762_01 | At1g52880 | NAM-like protein; protein id: At1g52880.1                                    | 0 | 1.44 | 3.41 | 5.0 | 0.05 | 2 Up progressive |
| A002788_01 | At1g17550 | protein phosphatase 2C, putative; protein id: At1g17550.1                    | 0 | 0.40 | 1.35 | 2.4 | 0.05 | 2 Up progressive |
| A002798_01 | At1g53570 | MAP3K alpha protein kinase, putative; protein id: At1g53570.1                | 0 | 1.27 | 1.89 | 2.4 | 0.05 | 2 Up progressive |
| A002818_01 | At1g21920 | phosphatidylinositol-4-phosphate 5-kinase, putative; protein id: At1g21920.1 | 0 | 0.78 | 2.63 | 3.5 | 0.05 | 2 Up progressive |
| A002834_01 | At1g10500 | unknown protein; protein id: At1g10500.1                                     | 0 | 0.89 | 1.83 | 3.0 | 0.05 | 2 Up progressive |
| A002854_01 | At1g80310 | putative sulfate transporter; protein id: At1g80310.1                        | 0 | 1.15 | 2.75 | 4.2 | 0.05 | 2 Up progressive |
| A002898_01 | At1g34630 | hypothetical protein; protein id: At1g34630.1                                | 0 | 0.48 | 1.28 | 1.6 | 0.41 | 2 Up progressive |
| A002950_01 | At1g52590 | expressed protein; protein id: At1g52590.1                                   | 0 | 0.69 | 1.84 | 3.0 | 0.05 | 2 Up progressive |
| A003004_01 | At1g77930 | expressed protein; protein id: At1g77930.1                                   | 0 | 0.73 | 1.62 | 1.9 | 0.17 | 2 Up progressive |
| A003012_01 | At1g71480 | unknown protein; protein id: At1g71480.1                                     | 0 | 0.70 | 1.62 | 1.4 | 1.11 | 2 Up progressive |
| A003016_01 | At1g55000 | expressed protein; protein id: At1g55000.1                                   | 0 | 0.74 | 1.26 | 1.6 | 0.36 | 2 Up progressive |
| A003082_01 | At1g31750 | expressed protein; protein id: At1g31750.1                                   | 0 | 0.75 | 1.92 | 1.1 | 5.44 | 2 Up progressive |
| A003287_01 | At1g56505 | hypothetical protein; protein id: At1g56505.1                                | 0 | 0.59 | 1.01 | 1.4 | 1.11 | 2 Up progressive |
| A003431_01 | At1g06460 | heat shock protein, putative; protein id: At1g06460.1                        | 0 | 1.03 | 1.77 | 1.7 | 0.23 | 2 Up progressive |
| A003434_01 | At1g15350 | expressed protein; protein id: At1g15350.1                                   | 0 | 0.73 | 1.74 | 3.9 | 0.05 | 2 Up progressive |
| A003530_01 | At1g64950 | cytochrome p450, putative; protein id: At1g64950.1                           | 0 | 0.45 | 1.36 | 1.9 | 0.11 | 2 Up progressive |
| A003533_01 | At1g78140 | expressed protein; protein id: At1g78140.1                                   | 0 | 0.37 | 1.04 | 2.0 | 0.08 | 2 Up progressive |
| A003536_01 | At1g35490 | bZIP family transcription factor; protein id: At1g35490.1                    | 0 | 0.52 | 1.13 | 1.2 | 2.11 | 2 Up progressive |
| A003537_01 | At1g63800 | E2, ubiquitin-conjugating enzyme 5 (UBC5); protein id: At1g63800.1           | 0 | 1.43 | 2.19 | 4.1 | 0.05 | 2 Up progressive |
| A003540_01 | At1g14420 | pectate lyase, putative; protein id: At1g14420.1                             | 0 | 0.53 | 1.53 | 1.5 | 0.60 | 2 Up progressive |
| A003606_01 | At1g70590 | expressed protein; protein id: At1g70590.1                                   | 0 | 0.80 | 1.24 | 2.1 | 0.08 | 2 Up progressive |
| A003703_01 | At1g48320 | hypothetical protein; protein id: At1g48320.1                                | 0 | 1.05 | 2.09 | 2.3 | 0.05 | 2 Up progressive |
| A003869_01 | At1g09180 | putative GTP-binding protein, SAR1B; protein id: At1g09180.1                 | 0 | 0.54 | 1.38 | 1.7 | 0.27 | 2 Up progressive |
| A003872_01 | At1g69570 | Dof zinc finger protein; protein id: At1g69570.1                             | 0 | 1.01 | 1.76 | 1.5 | 0.60 | 2 Up progressive |
| A003915_01 | At1g31170 | expressed protein; protein id: At1g31170.1                                   | 0 | 0.51 | 1.28 | 1.9 | 0.11 | 2 Up progressive |
| A003933_01 | xxxx      | b/t hypothetical protein; protein id: At1g11760.1                            | 0 | 0.56 | 1.75 | 1.6 | 0.36 | 2 Up progressive |
| A003960_01 | At1g14130 | dioxygenase-like protein; protein id: At1g14130.1                            | 0 | 1.72 | 2.78 | 3.2 | 0.05 | 2 Up progressive |
| A003974_01 | At1g21790 | expressed protein; protein id: At1g21790.1                                   | 0 | 0.71 | 1.01 | 1.3 | 1.42 | 2 Up progressive |
| A004165_01 | At1g01240 | expressed protein; protein id: At1g01240.1                                   | 0 | 1.48 | 2.30 | 3.3 | 0.05 | 2 Up progressive |
| A004244_01 | At1g71240 | hypothetical protein; protein id: At1g71240.1                                | 0 | 0.88 | 1.60 | 2.2 | 0.05 | 2 Up progressive |
| A004305_01 | At1g13670 | unknown protein; protein id: At1g13670.1                                     | 0 | 0.47 | 1.65 | 2.0 | 0.08 | 2 Up progressive |
| A004458_01 | At1g52870 | expressed protein; protein id: At1g52870.2                                   | 0 | 1.19 | 2.39 | 4.4 | 0.05 | 2 Up progressive |
| A004470_01 | At1g19720 | DYW7 protein; protein id: At1g19720.1                                        | 0 | 0.41 | 1.11 | 1.5 | 0.60 | 2 Up progressive |
| A004491_01 | At1g36980 | expressed protein; protein id: At1g36980.1                                   | 0 | 0.76 | 1.20 | 2.2 | 0.05 | 2 Up progressive |
| A004545_01 | At1g26670 | V-SNARE protein AtVT11b, putative; protein id: At1g26670.1                   | 0 | 0.90 | 1.55 | 2.4 | 0.05 | 2 Up progressive |



|            |               |                                                                     |   |      |      |     |      |                  |
|------------|---------------|---------------------------------------------------------------------|---|------|------|-----|------|------------------|
| A004587_01 | At1g78670     | gamma glutamyl hydrolase, putative; protein id:                     | 0 | 1.95 | 3.45 | 5.9 | 0.05 | 2 Up progressive |
| A004588_01 | At1g67920     | expressed protein; protein id: At1g67920.1                          | 0 | 1.56 | 3.48 | 4.5 | 0.05 | 2 Up progressive |
| A004603_01 | At1g79600     | expressed protein; protein id: At1g79600.1                          | 0 | 0.64 | 1.78 | 2.7 | 0.05 | 2 Up progressive |
| A004634_01 | At1g01720     | NAC domain protein, putative; protein id: At1g                      | 0 | 1.21 | 2.44 | 1.8 | 0.23 | 2 Up progressive |
| A004843_01 | At1g05805     | bHLH protein; protein id: At1g05805.1                               | 0 | 0.82 | 1.58 | 2.1 | 0.05 | 2 Up progressive |
| A004867_01 | At1g45150     | hypothetical protein; protein id: At1g45150.1                       | 0 | 0.65 | 1.23 | 1.7 | 0.23 | 2 Up progressive |
| A004931_01 | At1g21000     | expressed protein; protein id: At1g21000.1                          | 0 | 1.52 | 3.08 | 3.1 | 0.05 | 2 Up progressive |
| A004934_01 | At1g49670     | ARP protein, putative; protein id: At1g49670.1                      | 0 | 0.61 | 1.03 | 1.2 | 2.11 | 2 Up progressive |
| A004941_01 | At3g51830     | putative transmembrane protein G5p; protein                         | 0 | 0.58 | 1.00 | 1.7 | 0.23 | 2 Up progressive |
| A005042_01 | At4g15760     | monooxygenase 1 (MO1), putative; protein id:                        | 0 | 2.52 | 3.66 | 1.4 | 1.11 | 2 Up progressive |
| A005048_01 | At1g04970     | expressed protein; protein id: At1g04970.1                          | 0 | 0.91 | 1.39 | 2.0 | 0.08 | 2 Up progressive |
| A005129_01 | At5g24800     | bZIP protein, G/HBF-1-related; protein id: At5g                     | 0 | 0.73 | 1.11 | 1.7 | 0.27 | 2 Up progressive |
| A005164_01 | At3g44310     | nitrilase 1; protein id: At3g44310.1                                | 0 | 0.57 | 1.72 | 2.1 | 0.05 | 2 Up progressive |
| A005220_01 | At3g20770     | ethylene-insensitive 3 (EIN3); protein id: At3g                     | 0 | 0.43 | 1.01 | 1.1 | 5.44 | 2 Up progressive |
| A005227_01 | At5g25270     | putative protein; protein id: At5g25270.1                           | 0 | 0.80 | 1.18 | 1.5 | 0.60 | 2 Up progressive |
| A005249_01 | At1g20880     | RRM-containing protein; protein id: At1g20880                       | 0 | 0.94 | 1.52 | 2.2 | 0.05 | 2 Up progressive |
| A005417_01 | not annotated | Chr1 C/20403687-20403756                                            | 0 | 0.72 | 1.15 | 2.0 | 0.08 | 2 Up progressive |
| A005620_01 | At5g28020     | cysteine synthase; protein id: At5g28020.1                          | 0 | 1.04 | 1.56 | 2.3 | 0.05 | 2 Up progressive |
| A005648_01 | At2g04160     | subtilisin-like serine protease AIR3; protein id:                   | 0 | 0.82 | 2.24 | 1.8 | 0.17 | 2 Up progressive |
| A005695_01 | At1g65800     | receptor kinase, putative; protein id: At1g6580                     | 0 | 1.12 | 2.96 | 1.7 | 0.27 | 2 Up progressive |
| A005729_01 | At2g25625     | auxin-regulated protein; protein id: At2g25625                      | 0 | 2.94 | 4.20 | 2.4 | 0.05 | 2 Up progressive |
| A005733_01 | At2g46830     | myb-related transcription factor (CCA1); prote                      | 0 | 0.87 | 2.11 | 1.9 | 0.08 | 2 Up progressive |
| A005740_01 | At1g12730     | expressed protein; protein id: At1g12730.1                          | 0 | 0.89 | 1.49 | 2.1 | 0.08 | 2 Up progressive |
| A005839_01 | At5g27150     | NHE1 Na <sup>+</sup> /H <sup>+</sup> exchanger; protein id: At5g271 | 0 | 0.54 | 1.35 | 1.7 | 0.36 | 2 Up progressive |
| A005933_01 | At1g50640     | ethylene responsive element binding factor 3                        | 0 | 0.76 | 1.10 | 1.6 | 0.41 | 2 Up progressive |
| A005959_01 | At5g03240     | polyubiquitin (UBQ3); protein id: At5g03240.1                       | 0 | 0.97 | 1.50 | 2.0 | 0.08 | 2 Up progressive |
| A005969_01 | At1g61520     | light-harvesting chlorophyll a/b binding protein                    | 0 | 0.83 | 1.19 | 1.5 | 0.47 | 2 Up progressive |
| A006030_01 | At2g40880     | putative cysteine proteinase inhibitor B (cystat                    | 0 | 1.29 | 2.67 | 4.2 | 0.05 | 2 Up progressive |
| A006043_01 | At2g31570     | glutathione peroxidase, putative; protein id: At                    | 0 | 0.30 | 1.01 | 1.2 | 2.11 | 2 Up progressive |
| A006046_01 | At2g43510     | putative trypsin inhibitor; protein id: At2g43510                   | 0 | 1.85 | 2.77 | 2.9 | 0.05 | 2 Up progressive |
| A006050_01 | At2g39000     | unknown protein; protein id: At2g39000.1                            | 0 | 1.07 | 1.53 | 2.4 | 0.05 | 2 Up progressive |
| A006089_01 | At2g20920     | unknown protein; protein id: At2g20920.1                            | 0 | 0.87 | 2.06 | 4.4 | 0.05 | 2 Up progressive |
| A006105_01 | At2g03340     | WRKY family transcription factor; protein id: A                     | 0 | 0.73 | 1.25 | 1.2 | 2.11 | 2 Up progressive |
| A006124_01 | At2g05620     | expressed protein; protein id: At2g05620.1                          | 0 | 0.74 | 1.17 | 2.3 | 0.05 | 2 Up progressive |
| A006175_01 | At2g35690     | putative acyl-CoA oxidase; protein id: At2g356                      | 0 | 0.63 | 1.11 | 1.6 | 0.41 | 2 Up progressive |
| A006264_01 | At2g37460     | nodulin-like protein; protein id: At2g37460.1                       | 0 | 0.94 | 2.81 | 3.1 | 0.05 | 2 Up progressive |
| A006269_01 | At2g20180     | unknown protein; protein id: At2g20180.1                            | 0 | 0.77 | 1.27 | 1.5 | 0.47 | 2 Up progressive |
| A006273_01 | At2g01190     | expressed protein; protein id: At2g01190.1                          | 0 | 0.64 | 1.36 | 1.9 | 0.11 | 2 Up progressive |
| A006387_01 | At2g38640     | unknown protein; protein id: At2g38640.1                            | 0 | 0.74 | 2.26 | 3.2 | 0.05 | 2 Up progressive |
| A006389_01 | At2g32800     | putative protein kinase; protein id: At2g32800.                     | 0 | 0.95 | 1.78 | 1.7 | 0.23 | 2 Up progressive |
| A006567_01 | At2g46600     | putative caltractin; protein id: At2g46600.1                        | 0 | 0.63 | 2.10 | 2.1 | 0.08 | 2 Up progressive |
| A006596_01 | At2g29350     | putative tropinone reductase; protein id: At2g                      | 0 | 1.46 | 3.14 | 2.4 | 0.05 | 2 Up progressive |
| A006681_01 | At2g28810     | Dof zinc finger protein; protein id: At2g28810.                     | 0 | 0.61 | 1.21 | 1.6 | 0.41 | 2 Up progressive |
| A006710_01 | At2g38800     | calmodulin-binding protein; protein id: At2g38                      | 0 | 1.00 | 1.55 | 1.9 | 0.08 | 2 Up progressive |
| A006733_01 | At2g22010     | unknown protein; protein id: At2g22010.1                            | 0 | 0.36 | 1.06 | 1.3 | 1.42 | 2 Up progressive |

|            |           |                                                                            |   |      |      |     |      |                  |
|------------|-----------|----------------------------------------------------------------------------|---|------|------|-----|------|------------------|
| A006754_01 | At2g27290 | expressed protein; protein id: At2g27290.1                                 | 0 | 0.40 | 1.18 | 1.7 | 0.27 | 2 Up progressive |
| A006761_01 | At2g31880 | leucine-rich repeat transmembrane protein kir                              | 0 | 1.58 | 2.52 | 2.5 | 0.05 | 2 Up progressive |
| A006893_01 | At2g38170 | high affinity Ca <sup>2+</sup> antiporter; protein id: At2g38170.1         | 0 | 0.87 | 1.53 | 2.0 | 0.08 | 2 Up progressive |
| A006944_01 | At2g44490 | glycosyl hydrolase family 1; protein id: At2g44490.1                       | 0 | 1.38 | 2.84 | 3.3 | 0.05 | 2 Up progressive |
| A006954_01 | At2g39340 | unknown protein; protein id: At2g39340.1                                   | 0 | 0.65 | 1.28 | 2.4 | 0.05 | 2 Up progressive |
| A006975_01 | At2g46680 | homeodomain transcription factor (ATHB-7); protein id: At2g46680.1         | 0 | 2.01 | 2.86 | 2.9 | 0.05 | 2 Up progressive |
| A007000_01 | At2g02370 | expressed protein; protein id: At2g02370.1                                 | 0 | 0.53 | 1.30 | 2.0 | 0.08 | 2 Up progressive |
| A007052_01 | At2g27090 | hypothetical protein; protein id: At2g27090.1                              | 0 | 0.40 | 1.05 | 1.7 | 0.23 | 2 Up progressive |
| A007090_01 | At2g02180 | expressed protein; protein id: At2g02180.1                                 | 0 | 0.71 | 1.05 | 1.9 | 0.11 | 2 Up progressive |
| A007243_01 | At2g39360 | putative protein kinase; protein id: At2g39360.1                           | 0 | 0.83 | 1.88 | 2.1 | 0.08 | 2 Up progressive |
| A007283_01 | At2g24820 | putative Rieske iron-sulfur protein; protein id: At2g24820.1               | 0 | 0.66 | 1.16 | 1.3 | 1.42 | 2 Up progressive |
| A007284_01 | At2g19310 | putative small heat shock protein; protein id: At2g19310.1                 | 0 | 0.50 | 1.44 | 2.8 | 0.05 | 2 Up progressive |
| A007294_01 | At2g28720 | putative histone H2B; protein id: At2g28720.1                              | 0 | 0.90 | 2.24 | 2.8 | 0.05 | 2 Up progressive |
| A007351_01 | At2g33360 | hypothetical protein; protein id: At2g33360.1                              | 0 | 0.43 | 1.08 | 1.6 | 0.36 | 2 Up progressive |
| A007353_01 | At2g32870 | unknown protein; protein id: At2g32870.1                                   | 0 | 1.91 | 4.75 | 1.8 | 0.19 | 2 Up progressive |
| A007361_01 | At2g20960 | pEARLI 4 protein; protein id: At2g20960.1                                  | 0 | 0.35 | 1.06 | 1.9 | 0.17 | 2 Up progressive |
| A007366_01 | At2g17760 | putative chloroplast nucleoid DNA-binding protein; protein id: At2g17760.1 | 0 | 0.59 | 1.01 | 1.6 | 0.47 | 2 Up progressive |
| A007429_01 | At2g26690 | putative nitrate transporter; protein id: At2g26690.1                      | 0 | 1.64 | 2.33 | 2.1 | 0.08 | 2 Up progressive |
| A007433_01 | At2g45220 | pectinesterase family; protein id: At2g45220.1                             | 0 | 1.32 | 2.80 | 3.6 | 0.05 | 2 Up progressive |
| A007604_01 | At2g04795 | expressed protein; protein id: At2g04795.1                                 | 0 | 1.36 | 2.75 | 1.5 | 0.60 | 2 Up progressive |
| A007727_01 | At2g31950 | molybdopterin synthase (CNX2); protein id: At2g31950.1                     | 0 | 0.97 | 1.47 | 1.7 | 0.36 | 2 Up progressive |
| A007746_01 | At2g40890 | cytochrome p450, putative; protein id: At2g40890.1                         | 0 | 0.52 | 1.72 | 2.1 | 0.08 | 2 Up progressive |
| A007753_01 | At2g37240 | expressed protein; protein id: At2g37240.1                                 | 0 | 0.36 | 1.15 | 2.1 | 0.08 | 2 Up progressive |
| A007770_01 | At2g39660 | putative protein kinase; protein id: At2g39660.1                           | 0 | 0.44 | 1.53 | 2.1 | 0.08 | 2 Up progressive |
| A007781_01 | At2g21620 | auxin-regulated protein; protein id: At2g21620.1                           | 0 | 1.46 | 2.08 | 3.4 | 0.05 | 2 Up progressive |
| A007786_01 | At2g36410 | expressed protein; protein id: At2g36410.1                                 | 0 | 0.74 | 1.17 | 1.5 | 0.47 | 2 Up progressive |
| A007830_01 | At2g29970 | expressed protein; protein id: At2g29970.1                                 | 0 | 0.56 | 1.35 | 2.5 | 0.05 | 2 Up progressive |
| A007844_01 | At2g36320 | expressed protein; protein id: At2g36320.1                                 | 0 | 1.50 | 2.14 | 3.1 | 0.05 | 2 Up progressive |
| A007859_01 | At2g45040 | putative metalloproteinase; protein id: At2g45040.1                        | 0 | 1.91 | 3.02 | 1.4 | 0.75 | 2 Up progressive |
| A007860_01 | At2g03310 | hypothetical protein; protein id: At2g03310.1                              | 0 | 1.46 | 2.89 | 3.8 | 0.05 | 2 Up progressive |
| A007897_01 | At2g16790 | putative gluconokinase; protein id: At2g16790.1                            | 0 | 1.01 | 2.38 | 1.5 | 0.47 | 2 Up progressive |
| A007973_01 | At2g37650 | putative scarecrow gene regulator; protein id: At2g37650.1                 | 0 | 0.76 | 1.39 | 1.1 | 5.44 | 2 Up progressive |
| A008004_01 | At2g26570 | unknown protein; protein id: At2g26570.1                                   | 0 | 0.40 | 1.13 | 2.5 | 0.05 | 2 Up progressive |
| A008042_01 | At2g03730 | putative uridylyl transferase; protein id: At2g03730.1                     | 0 | 0.78 | 1.66 | 3.4 | 0.05 | 2 Up progressive |
| A008068_01 | At2g31130 | expressed protein; protein id: At2g31130.1                                 | 0 | 0.82 | 1.43 | 1.8 | 0.19 | 2 Up progressive |
| A008214_01 | At2g07000 | unknown protein; protein id: At2g07000.1                                   | 0 | 1.41 | 2.28 | 1.3 | 1.42 | 2 Up progressive |
| A008262_01 | At2g46100 | unknown protein; protein id: At2g46100.1                                   | 0 | 0.77 | 1.45 | 2.4 | 0.05 | 2 Up progressive |
| A008330_01 | At2g24550 | expressed protein; protein id: At2g24550.1                                 | 0 | 1.04 | 1.97 | 1.9 | 0.08 | 2 Up progressive |
| A008459_01 | At2g45210 | putative auxin-regulated protein; protein id: At2g45210.1                  | 0 | 2.01 | 3.46 | 4.3 | 0.05 | 2 Up progressive |
| A008500_01 | At2g35940 | BEL1-like homeobox 1 protein (BLH1); protein id: At2g35940.1               | 0 | 1.22 | 2.38 | 3.1 | 0.05 | 2 Up progressive |
| A008520_01 | At2g24450 | fasciclin-like arabinogalactan-protein, putative                           | 0 | 0.40 | 1.23 | 1.2 | 2.11 | 2 Up progressive |
| A008576_01 | At2g46340 | putative photomorphogenesis repressor protein; protein id: At2g46340.1     | 0 | 0.70 | 1.20 | 1.3 | 1.42 | 2 Up progressive |
| A008582_01 | At2g36950 | expressed protein; protein id: At2g36950.1                                 | 0 | 1.84 | 2.97 | 3.1 | 0.05 | 2 Up progressive |
| A008605_01 | At2g22990 | putative serine carboxypeptidase I; protein id: At2g22990.1                | 0 | 2.09 | 3.15 | 3.5 | 0.05 | 2 Up progressive |
| A008648_01 | At2g43540 | expressed protein; protein id: At2g43540.1                                 | 0 | 0.39 | 1.03 | 1.3 | 1.11 | 2 Up progressive |

|            |           |                                                  |   |      |      |     |      |                  |
|------------|-----------|--------------------------------------------------|---|------|------|-----|------|------------------|
| A008660_01 | At2g30250 | WRKY family transcription factor; protein id: A  | 0 | 1.55 | 2.61 | 1.1 | 5.44 | 2 Up progressive |
| A008673_01 | At2g30660 | 3-hydroxyisobutyryl-coenzyme A hydrolase; pr     | 0 | 0.72 | 1.50 | 2.7 | 0.05 | 2 Up progressive |
| A008807_01 | At2g46860 | putative inorganic pyrophosphatase; protein ic   | 0 | 0.78 | 1.38 | 1.9 | 0.11 | 2 Up progressive |
| A008819_01 | At2g47050 | putative pectinesterase; protein id: At2g47050   | 0 | 0.41 | 1.08 | 1.3 | 1.42 | 2 Up progressive |
| A008958_01 | At3g61180 | putative protein; protein id: At3g61180.1        | 0 | 0.49 | 1.06 | 1.5 | 0.47 | 2 Up progressive |
| A008961_01 | At3g02150 | expressed protein; protein id: At3g02150.1       | 0 | 0.79 | 1.94 | 2.6 | 0.05 | 2 Up progressive |
| A009081_01 | At3g11380 | hypothetical protein; protein id: At3g11380.1    | 0 | 0.38 | 1.09 | 1.5 | 0.60 | 2 Up progressive |
| A009105_01 | At3g09830 | putative protein kinase; protein id: At3g09830.  | 0 | 1.32 | 2.05 | 3.2 | 0.05 | 2 Up progressive |
| A009145_01 | At3g16220 | hypothetical protein; protein id: At3g16220.1    | 0 | 0.71 | 1.37 | 1.9 | 0.11 | 2 Up progressive |
| A009187_01 | At3g28270 | At14a; protein id: At3g28270.1                   | 0 | 1.95 | 2.96 | 2.8 | 0.05 | 2 Up progressive |
| A009221_01 | At3g63310 | putative protein; protein id: At3g63310.1        | 0 | 0.64 | 1.17 | 1.6 | 0.41 | 2 Up progressive |
| A009368_01 | At3g51420 | strictosidine synthase-related; protein id: At3g | 0 | 0.74 | 1.30 | 2.2 | 0.05 | 2 Up progressive |
| A009378_01 | At3g27820 | monodehydroascorbate reductase, putative; p      | 0 | 1.02 | 1.49 | 2.7 | 0.05 | 2 Up progressive |
| A009506_01 | At3g43230 | putative protein; protein id: At3g43230.1        | 0 | 0.87 | 1.42 | 1.6 | 0.41 | 2 Up progressive |
| A009507_01 | At3g19553 | amino acid permease, putative; protein id: At3   | 0 | 1.19 | 2.23 | 1.7 | 0.27 | 2 Up progressive |
| A009583_01 | At3g47250 | putative protein; protein id: At3g47250.1        | 0 | 1.24 | 2.58 | 3.5 | 0.05 | 2 Up progressive |
| A009665_01 | At3g01250 | hypothetical protein; protein id: At3g01250.1    | 0 | 0.44 | 1.05 | 1.4 | 0.75 | 2 Up progressive |
| A009738_01 | At3g46930 | protein kinase 6-like protein; protein id: At3g4 | 0 | 0.76 | 1.57 | 1.7 | 0.36 | 2 Up progressive |
| A009740_01 | At3g57390 | MADS-box protein; protein id: At3g57390.1        | 0 | 0.77 | 1.25 | 2.0 | 0.08 | 2 Up progressive |
| A009765_01 | At3g24190 | expressed protein; protein id: At3g24190.1       | 0 | 0.57 | 1.26 | 2.3 | 0.05 | 2 Up progressive |
| A009803_01 | At3g03480 | putative hypersensitivity-related gene; protein  | 0 | 1.12 | 1.69 | 2.0 | 0.08 | 2 Up progressive |
| A009836_01 | At3g01970 | WRKY family transcription factor; protein id: A  | 0 | 1.44 | 3.20 | 1.7 | 0.27 | 2 Up progressive |
| A009989_01 | At3g02800 | unknown protein; protein id: At3g02800.1         | 0 | 0.46 | 1.30 | 1.6 | 0.36 | 2 Up progressive |
| A010313_01 | At3g15351 | expressed protein; protein id: At3g15351.1       | 0 | 0.72 | 1.13 | 1.5 | 0.60 | 2 Up progressive |
| A010348_01 | At3g52620 | hypothetical protein; protein id: At3g52620.1    | 0 | 0.82 | 1.72 | 1.7 | 0.27 | 2 Up progressive |
| A010400_01 | At3g56310 | glycosyl hydrolase family 27 (alpha-galactosid   | 0 | 0.73 | 1.41 | 2.2 | 0.05 | 2 Up progressive |
| A010518_01 | At3g50770 | calmodulin-like protein; protein id: At3g50770.  | 0 | 1.28 | 2.40 | 2.7 | 0.05 | 2 Up progressive |
| A010527_01 | At3g56170 | putative protein; protein id: At3g56170.1        | 0 | 1.17 | 1.97 | 2.2 | 0.05 | 2 Up progressive |
| A010535_01 | At3g23170 | expressed protein; protein id: At3g23170.1       | 0 | 0.51 | 1.02 | 1.6 | 0.47 | 2 Up progressive |
| A010555_01 | At3g03470 | cytochrome p450, putative; protein id: At3g03    | 0 | 1.80 | 3.45 | 4.8 | 0.05 | 2 Up progressive |
| A010619_01 | At3g26510 | unknown protein; protein id: At3g26510.1         | 0 | 1.62 | 2.74 | 2.8 | 0.05 | 2 Up progressive |
| A010632_01 | At3g09450 | hypothetical protein; protein id: At3g09450.1    | 0 | 1.61 | 3.05 | 1.2 | 2.11 | 2 Up progressive |
| A010648_01 | At3g22890 | ATP sulfurylase, putative; protein id: At3g228   | 0 | 0.63 | 2.11 | 1.7 | 0.23 | 2 Up progressive |
| A010677_01 | At3g01100 | unknown protein; protein id: At3g01100.1         | 0 | 0.72 | 1.44 | 2.7 | 0.05 | 2 Up progressive |
| A010690_01 | At3g04240 | putative O-linked GlcNAc transferase; protein    | 0 | 0.56 | 1.04 | 1.5 | 0.60 | 2 Up progressive |
| A010693_01 | At3g44880 | lethal leaf-spot 1 homolog Lls1; protein id: At3 | 0 | 0.65 | 1.46 | 2.4 | 0.05 | 2 Up progressive |
| A010696_01 | At3g04520 | L-allo-threonine aldolase, putative; protein id: | 0 | 0.66 | 1.04 | 1.6 | 0.47 | 2 Up progressive |
| A010704_01 | At3g04350 | expressed protein; protein id: At3g04350.1       | 0 | 0.73 | 1.33 | 1.9 | 0.17 | 2 Up progressive |
| A010874_01 | At3g10525 | expressed protein; protein id: At3g10525.1       | 0 | 1.18 | 1.73 | 3.0 | 0.05 | 2 Up progressive |
| A010964_01 | At3g56290 | putative protein; protein id: At3g56290.1        | 0 | 0.93 | 1.84 | 2.1 | 0.05 | 2 Up progressive |
| A011007_01 | At3g11930 | ethylene-responsive protein, putative; protein   | 0 | 1.45 | 2.69 | 2.8 | 0.05 | 2 Up progressive |
| A011019_01 | At3g20530 | protein kinase, putative; protein id: At3g20530  | 0 | 0.41 | 1.30 | 1.4 | 0.75 | 2 Up progressive |
| A011029_01 | At3g19895 | unknown protein; protein id: At3g19895.1         | 0 | 0.65 | 1.65 | 2.0 | 0.08 | 2 Up progressive |
| A011033_01 | At3g15580 | AtAPG8i; expressed protein; protein id: At3g1    | 0 | 0.83 | 1.37 | 2.3 | 0.05 | 2 Up progressive |
| A011090_01 | At3g27390 | unknown protein; protein id: At3g27390.1         | 0 | 0.80 | 1.34 | 1.4 | 1.11 | 2 Up progressive |

|            |           |                                                    |   |      |      |     |      |                  |
|------------|-----------|----------------------------------------------------|---|------|------|-----|------|------------------|
| A011109_01 | At3g28750 | unknown protein; protein id: At3g28750.1           | 0 | 0.44 | 1.41 | 1.4 | 0.75 | 2 Up progressive |
| A011198_01 | At3g60140 | glycosyl hydrolase family 1, beta-glucosidase;     | 0 | 2.44 | 3.57 | 1.8 | 0.19 | 2 Up progressive |
| A011285_01 | At3g53960 | transporter-like protein; protein id: At3g53960.   | 0 | 0.89 | 2.50 | 1.6 | 0.41 | 2 Up progressive |
| A011311_01 | At3g10230 | lycopene beta cyclase; protein id: At3g10230.      | 0 | 0.56 | 1.01 | 1.7 | 0.27 | 2 Up progressive |
| A011407_01 | At3g01230 | hypothetical protein; protein id: At3g01230.1      | 0 | 0.66 | 1.80 | 1.6 | 0.41 | 2 Up progressive |
| A011441_01 | At3g10250 | expressed protein; protein id: At3g10250.1         | 0 | 0.77 | 1.47 | 1.7 | 0.36 | 2 Up progressive |
| A011550_01 | At3g04140 | unknown protein; protein id: At3g04140.1           | 0 | 0.56 | 1.89 | 1.9 | 0.17 | 2 Up progressive |
| A011726_01 | At3g15353 | expressed protein; protein id: At3g15353.1         | 0 | 1.56 | 3.45 | 3.0 | 0.05 | 2 Up progressive |
| A011767_01 | At3g13550 | E2, ubiquitin-conjugating enzyme, putative; pr     | 0 | 0.73 | 1.27 | 2.4 | 0.05 | 2 Up progressive |
| A011781_01 | At3g51920 | putative calmodulin; protein id: At3g51920.1       | 0 | 1.39 | 2.68 | 2.6 | 0.05 | 2 Up progressive |
| A011820_01 | At3g56360 | putative protein; protein id: At3g56360.1          | 0 | 1.39 | 2.00 | 2.3 | 0.05 | 2 Up progressive |
| A011862_01 | At3g54140 | peptide transport - like protein; protein id: At3g | 0 | 1.52 | 2.34 | 3.6 | 0.05 | 2 Up progressive |
| A011864_01 | At3g54200 | putative protein; protein id: At3g54200.1          | 0 | 0.49 | 1.18 | 1.1 | 5.44 | 2 Up progressive |
| A011875_01 | At3g57690 | arabinogalactan-protein, putative (AGP23); pr      | 0 | 0.40 | 1.32 | 1.8 | 0.19 | 2 Up progressive |
| A011887_01 | At3g52070 | putative protein; protein id: At3g52070.1          | 0 | 0.91 | 1.78 | 1.2 | 2.11 | 2 Up progressive |
| A011963_01 | At3g27960 | hypothetical protein; protein id: At3g27960.1      | 0 | 0.80 | 1.41 | 1.8 | 0.23 | 2 Up progressive |
| A011976_01 | At3g10910 | putative RING zinc finger protein; protein id: A   | 0 | 1.09 | 2.20 | 2.5 | 0.05 | 2 Up progressive |
| A012030_01 | At3g02480 | expressed protein; protein id: At3g02480.1         | 0 | 0.62 | 1.18 | 1.4 | 0.75 | 2 Up progressive |
| A012085_01 | At3g16940 | calmodulin-binding protein; protein id: At3g169    | 0 | 0.67 | 1.14 | 2.2 | 0.05 | 2 Up progressive |
| A012186_01 | At3g02130 | leucine-rich repeat transmembrane protein kir      | 0 | 0.37 | 1.02 | 1.2 | 2.11 | 2 Up progressive |
| A012256_01 | At3g10320 | unknown protein; protein id: At3g10320.1           | 0 | 1.88 | 2.78 | 2.4 | 0.05 | 2 Up progressive |
| A012275_01 | At3g07700 | expressed protein; protein id: At3g07700.1         | 0 | 1.08 | 2.22 | 3.0 | 0.05 | 2 Up progressive |
| A012283_01 | At3g22560 | hypothetical protein; protein id: At3g22560.1      | 0 | 1.16 | 1.98 | 2.0 | 0.08 | 2 Up progressive |
| A012360_01 | At3g11310 | hypothetical protein; protein id: At3g11310.1      | 0 | 0.69 | 1.05 | 1.8 | 0.23 | 2 Up progressive |
| A012375_01 | At3g12680 | hypothetical protein; protein id: At3g12680.1      | 0 | 0.61 | 1.01 | 1.6 | 0.41 | 2 Up progressive |
| A012386_01 | At3g57810 | auxin-regulated protein; protein id: At3g57810     | 0 | 1.29 | 2.22 | 1.2 | 2.11 | 2 Up progressive |
| A012442_01 | At3g17930 | expressed protein; protein id: At3g17930.1         | 0 | 0.46 | 1.31 | 1.7 | 0.36 | 2 Up progressive |
| A012468_01 | At3g53810 | serine/threonine-specific kinase like protein; p   | 0 | 0.77 | 1.40 | 1.6 | 0.41 | 2 Up progressive |
| A012518_01 | At3g60570 | expansin family; protein id: At3g60570.1           | 0 | 0.39 | 1.20 | 1.9 | 0.17 | 2 Up progressive |
| A012572_01 | At3g06510 | glycosyl hydrolase family 1; protein id: At3g06    | 0 | 1.04 | 1.75 | 2.9 | 0.05 | 2 Up progressive |
| A012579_01 | At3g52400 | syntaxin SYP122; protein id: At3g52400.1           | 0 | 0.91 | 2.03 | 1.3 | 1.42 | 2 Up progressive |
| A012651_01 | At3g58490 | putative protein; protein id: At3g58490.1          | 0 | 0.56 | 1.19 | 2.1 | 0.08 | 2 Up progressive |
| A012672_01 | At3g52800 | zinc finger - like protein; protein id: At3g52800  | 0 | 1.08 | 1.77 | 2.1 | 0.05 | 2 Up progressive |
| A012685_01 | At3g50830 | putative cold acclimation protein; protein id: At  | 0 | 0.71 | 1.35 | 2.2 | 0.05 | 2 Up progressive |
| A012722_01 | At3g53410 | putative protein; protein id: At3g53410.1          | 0 | 0.50 | 1.08 | 1.7 | 0.27 | 2 Up progressive |
| A012732_01 | At3g06810 | acetyl-coA dehydrogenase, putative; protein id     | 0 | 1.26 | 1.83 | 1.7 | 0.27 | 2 Up progressive |
| A012741_01 | At3g10500 | expressed protein; protein id: At3g10500.1         | 0 | 0.92 | 1.55 | 2.0 | 0.08 | 2 Up progressive |
| A012749_01 | At3g59060 | putative protein; protein id: At3g59060.1          | 0 | 1.60 | 2.54 | 3.3 | 0.05 | 2 Up progressive |
| A012797_01 | At3g27110 | expressed protein; protein id: At3g27110.1         | 0 | 1.08 | 2.38 | 3.2 | 0.05 | 2 Up progressive |
| A012835_01 | At3g17510 | expressed protein; protein id: At3g17510.1         | 0 | 0.50 | 1.07 | 1.9 | 0.17 | 2 Up progressive |
| A012860_01 | At4g37930 | glycine hydroxymethyltransferase like protein;     | 0 | 0.70 | 1.44 | 2.4 | 0.05 | 2 Up progressive |
| A012865_01 | At4g19420 | pectinacetylerase family; protein id: At4g19       | 0 | 2.56 | 4.42 | 4.5 | 0.05 | 2 Up progressive |
| A012888_01 | At4g15550 | glucosyltransferase like protein; protein id: At4  | 0 | 0.65 | 2.11 | 3.2 | 0.05 | 2 Up progressive |
| A012934_01 | At4g08920 | Arabidopsis thaliana flavin-type blue-light phot   | 0 | 0.96 | 1.72 | 2.4 | 0.05 | 2 Up progressive |
| A012940_01 | At4g10060 | putative protein; protein id: At4g10060.1          | 0 | 0.94 | 2.32 | 2.3 | 0.05 | 2 Up progressive |

|            |           |                                                        |   |      |      |     |      |                  |
|------------|-----------|--------------------------------------------------------|---|------|------|-----|------|------------------|
| A012959_01 | At4g14710 | expressed protein; protein id: At4g14710.1             | 0 | 0.56 | 1.04 | 1.3 | 1.11 | 2 Up progressive |
| A012966_01 | At4g20070 | hyuC-like protein; protein id: At4g20070.1             | 0 | 0.66 | 1.99 | 2.3 | 0.05 | 2 Up progressive |
| A013004_01 | At4g18580 | expressed protein; protein id: At4g18580.1             | 0 | 0.49 | 1.55 | 1.9 | 0.17 | 2 Up progressive |
| A013051_01 | At4g08850 | receptor protein kinase-like protein; protein id:      | 0 | 1.16 | 2.11 | 1.2 | 2.11 | 2 Up progressive |
| A013063_01 | At4g18530 | putative protein; protein id: At4g18530.1              | 0 | 0.38 | 1.20 | 1.9 | 0.11 | 2 Up progressive |
| A013105_01 | At4g38260 | putative protein; protein id: At4g38260.1              | 0 | 0.30 | 1.02 | 1.9 | 0.08 | 2 Up progressive |
| A013107_01 | At4g12980 | putative protein; protein id: At4g12980.1              | 0 | 0.47 | 1.22 | 1.6 | 0.41 | 2 Up progressive |
| A013142_01 | At4g24120 | putative protein; protein id: At4g24120.1              | 0 | 0.70 | 1.94 | 2.3 | 0.05 | 2 Up progressive |
| A013212_01 | At4g15490 | UDP-glycosyltransferase, putative; protein id:         | 0 | 1.84 | 3.01 | 1.4 | 1.11 | 2 Up progressive |
| A013249_01 | At4g21810 | putative protein; protein id: At4g21810.1              | 0 | 0.48 | 1.02 | 1.6 | 0.41 | 2 Up progressive |
| A013260_01 | At4g10330 | hypothetical protein; protein id: At4g10330.1          | 0 | 0.59 | 1.18 | 1.3 | 1.11 | 2 Up progressive |
| A013467_01 | At4g03400 | putative GH3-like protein; protein id: At4g03400.1     | 0 | 0.44 | 1.27 | 1.6 | 0.36 | 2 Up progressive |
| A013468_01 | At4g03410 | hypothetical protein; protein id: At4g03410.1          | 0 | 1.16 | 1.86 | 2.7 | 0.05 | 2 Up progressive |
| A013470_01 | At4g03560 | putative calcium channel; protein id: At4g03560.1      | 0 | 1.38 | 2.37 | 3.5 | 0.05 | 2 Up progressive |
| A013535_01 | At4g14020 | expressed protein; protein id: At4g14020.1             | 0 | 2.17 | 4.21 | 2.8 | 0.05 | 2 Up progressive |
| A013559_01 | At4g15620 | hypothetical protein; protein id: At4g15620.1          | 0 | 0.92 | 2.86 | 4.2 | 0.05 | 2 Up progressive |
| A013560_01 | At4g15630 | expressed protein; protein id: At4g15630.1             | 0 | 0.96 | 1.83 | 2.7 | 0.05 | 2 Up progressive |
| A013586_01 | At4g17070 | expressed protein; protein id: At4g17070.1             | 0 | 0.39 | 1.35 | 2.2 | 0.05 | 2 Up progressive |
| A013605_01 | At4g28290 | putative protein; protein id: At4g28290.1              | 0 | 0.95 | 1.55 | 2.2 | 0.05 | 2 Up progressive |
| A013657_01 | At4g12080 | putative DNA-binding protein; protein id: At4g12080.1  | 0 | 0.94 | 1.98 | 1.4 | 0.75 | 2 Up progressive |
| A013663_01 | At4g12070 | putative protein; protein id: At4g12070.1              | 0 | 0.62 | 1.57 | 1.1 | 5.44 | 2 Up progressive |
| A013695_01 | At4g03420 | hypothetical protein; protein id: At4g03420.1          | 0 | 0.59 | 1.30 | 2.1 | 0.08 | 2 Up progressive |
| A013717_01 | At4g16190 | cysteine proteinase; protein id: At4g16190.1           | 0 | 1.19 | 2.17 | 2.2 | 0.05 | 2 Up progressive |
| A013719_01 | At4g15530 | pyruvate,orthophosphate dikinase; protein id:          | 0 | 1.78 | 2.76 | 3.2 | 0.05 | 2 Up progressive |
| A013796_01 | At4g00355 | expressed protein; protein id: At4g00355.1             | 0 | 0.60 | 1.19 | 1.7 | 0.27 | 2 Up progressive |
| A013799_01 | At4g30993 | expressed protein; protein id: At4g30993.1             | 0 | 0.75 | 1.83 | 2.5 | 0.05 | 2 Up progressive |
| A013875_01 | At4g08290 | nodulin-like protein; protein id: At4g08290.1          | 0 | 1.60 | 2.29 | 1.2 | 5.44 | 2 Up progressive |
| A013980_01 | At4g35290 | putative protein; protein id: At4g35290.1              | 0 | 0.41 | 1.16 | 2.1 | 0.08 | 2 Up progressive |
| A014046_01 | At4g25000 | alpha-amylase - like protein; protein id: At4g25000.1  | 0 | 1.30 | 2.04 | 2.9 | 0.05 | 2 Up progressive |
| A014056_01 | At4g30210 | NADPH-ferrihemoprotein reductase (ATR2)                | 0 | 0.33 | 1.07 | 1.7 | 0.27 | 2 Up progressive |
| A014124_01 | At4g27800 | protein phosphatase homolog (PPH1); protein            | 0 | 0.72 | 1.02 | 1.3 | 1.42 | 2 Up progressive |
| A014131_01 | At4g14040 | selenium-binding protein like; protein id: At4g14040.1 | 0 | 1.14 | 2.04 | 1.6 | 0.47 | 2 Up progressive |
| A014132_01 | At4g38225 | expressed protein; protein id: At4g38225.1             | 0 | 0.49 | 1.10 | 1.3 | 1.11 | 2 Up progressive |
| A014168_01 | At4g24700 | hypothetical protein; protein id: At4g24700.1          | 0 | 0.64 | 1.49 | 1.9 | 0.11 | 2 Up progressive |
| A014176_01 | At4g39100 | ES43 like protein; protein id: At4g39100.1             | 0 | 0.73 | 1.10 | 1.9 | 0.08 | 2 Up progressive |
| A014224_01 | At4g09890 | putative protein; protein id: At4g09890.1              | 0 | 0.71 | 1.74 | 1.8 | 0.17 | 2 Up progressive |
| A014274_01 | At4g12830 | hydrolase-like protein; protein id: At4g12830.1        | 0 | 1.39 | 2.26 | 3.2 | 0.05 | 2 Up progressive |
| A014304_01 | At4g29110 | putative protein; protein id: At4g29110.1              | 0 | 1.15 | 2.48 | 1.5 | 0.60 | 2 Up progressive |
| A014469_01 | At4g28490 | leucine-rich repeat transmembrane protein kir          | 0 | 1.91 | 2.77 | 2.4 | 0.05 | 2 Up progressive |
| A014474_01 | At4g08500 | MEKK1/MAP kinase kinase kinase; protein id:            | 0 | 0.57 | 1.03 | 1.4 | 0.75 | 2 Up progressive |
| A014571_01 | At4g28270 | putative protein; protein id: At4g28270.1              | 0 | 1.23 | 2.17 | 2.4 | 0.05 | 2 Up progressive |
| A014612_01 | At4g13010 | putative protein; protein id: At4g13010.1              | 0 | 0.71 | 1.28 | 1.8 | 0.19 | 2 Up progressive |
| A014622_01 | At4g27990 | A.t. histone deacetylase mRNA, complete cds            | 0 | 0.41 | 1.14 | 2.0 | 0.08 | 2 Up progressive |
| A014705_01 | At4g35750 | putative protein; protein id: At4g35750.1              | 0 | 1.46 | 2.63 | 2.5 | 0.05 | 2 Up progressive |
| A014842_01 | At4g26860 | putative proline synthetase associated protein         | 0 | 0.74 | 1.19 | 1.9 | 0.17 | 2 Up progressive |

|            |           |                                                  |   |      |      |     |      |                  |
|------------|-----------|--------------------------------------------------|---|------|------|-----|------|------------------|
| A014860_01 | At4g29820 | mRNA cleavage factor subunit - like protein; p   | 0 | 0.72 | 1.19 | 1.7 | 0.27 | 2 Up progressive |
| A014927_01 | At4g03290 | putative calmodulin; protein id: At4g03290.1     | 0 | 0.49 | 1.30 | 1.2 | 2.11 | 2 Up progressive |
| A014928_01 | At4g03320 | putative chloroplast protein import component    | 0 | 0.97 | 1.43 | 1.8 | 0.19 | 2 Up progressive |
| A014929_01 | At4g25650 | putative protein; protein id: At4g25650.1        | 0 | 0.52 | 1.32 | 2.4 | 0.05 | 2 Up progressive |
| A014939_01 | At4g25900 | possible apospory-associated like protein        | 0 | 0.57 | 1.77 | 3.4 | 0.05 | 2 Up progressive |
| A014955_01 | At4g27480 | N-acetylglucosaminyltransferase family (Core-    | 0 | 0.76 | 1.44 | 2.1 | 0.05 | 2 Up progressive |
| A014976_01 | At4g08180 | putative protein; protein id: At4g08180.1        | 0 | 0.61 | 1.17 | 1.5 | 0.60 | 2 Up progressive |
| A015013_01 | At4g24990 | expressed protein; protein id: At4g24990.1       | 0 | 0.78 | 1.68 | 2.4 | 0.05 | 2 Up progressive |
| A015071_01 | At4g25100 | iron superoxide dismutase (FSD1); protein id:    | 0 | 1.07 | 2.32 | 1.5 | 0.60 | 2 Up progressive |
| A015105_01 | At4g04955 | expressed protein; protein id: At4g04955.1       | 0 | 1.22 | 2.28 | 2.2 | 0.05 | 2 Up progressive |
| A015134_01 | At4g22710 | cytochrome p450 family; protein id: At4g22710    | 0 | 1.05 | 2.53 | 2.7 | 0.05 | 2 Up progressive |
| A015182_01 | At4g13830 | DnaJ-like protein; protein id: At4g13830.1       | 0 | 1.55 | 2.51 | 3.6 | 0.05 | 2 Up progressive |
| A015249_01 | At4g35060 | copper chaperone (CCH)-related; protein id: A    | 0 | 1.04 | 2.29 | 2.7 | 0.05 | 2 Up progressive |
| A015339_01 | At4g00780 | coded for by A. thaliana cDNA T20615; protei     | 0 | 1.59 | 3.69 | 2.9 | 0.05 | 2 Up progressive |
| A015378_01 | At4g32190 | putative protein; protein id: At4g32190.1        | 0 | 0.29 | 1.01 | 1.8 | 0.19 | 2 Up progressive |
| A015422_01 | At4g36530 | putative protein; protein id: At4g36530.1        | 0 | 0.37 | 1.14 | 1.6 | 0.41 | 2 Up progressive |
| A015439_01 | At4g36790 | putative protein; protein id: At4g36790.1        | 0 | 0.56 | 1.41 | 3.0 | 0.05 | 2 Up progressive |
| A015447_01 | At4g36930 | bHLH protein, SPATULA; protein id: At4g36930     | 0 | 0.64 | 1.82 | 2.7 | 0.05 | 2 Up progressive |
| A015448_01 | At4g18740 | hypothetical protein; protein id: At4g18740.1    | 0 | 0.75 | 1.40 | 1.6 | 0.47 | 2 Up progressive |
| A015498_01 | At5g10930 | serine/threonine protein kinase -like protein; p | 0 | 1.33 | 2.89 | 2.4 | 0.05 | 2 Up progressive |
| A015504_01 | At5g11090 | putative protein; protein id: At5g11090.1        | 0 | 0.69 | 1.87 | 1.8 | 0.19 | 2 Up progressive |
| A015508_01 | At5g62770 | putative protein; protein id: At5g62770.1        | 0 | 0.55 | 1.64 | 1.4 | 0.75 | 2 Up progressive |
| A015510_01 | At5g62750 | putative protein; protein id: At5g62750.1        | 0 | 0.61 | 1.93 | 2.0 | 0.08 | 2 Up progressive |
| A015534_01 | At5g45250 | disease resistance protein RPS4 (TIR-NBS-LI      | 0 | 0.66 | 1.42 | 2.0 | 0.08 | 2 Up progressive |
| A015540_01 | At5g53730 | hairpin-induced protein, putative (HIN1); prote  | 0 | 2.03 | 3.35 | 3.8 | 0.05 | 2 Up progressive |
| A015595_01 | At5g40670 | putative protein; protein id: At5g40670.1        | 0 | 0.66 | 1.68 | 2.9 | 0.05 | 2 Up progressive |
| A015639_01 | At5g25130 | cytochrome p450 family; protein id: At5g25130    | 0 | 1.35 | 2.17 | 2.7 | 0.05 | 2 Up progressive |
| A015647_01 | At5g10740 | protein phosphatase 2C -like protein; protein i  | 0 | 0.70 | 1.24 | 1.6 | 0.41 | 2 Up progressive |
| A015649_01 | At5g07360 | putative amidase; protein id: At5g07360.1        | 0 | 0.64 | 1.36 | 2.2 | 0.05 | 2 Up progressive |
| A015658_01 | At5g03190 | putative protein; protein id: At5g03190.1        | 0 | 0.88 | 1.57 | 1.8 | 0.23 | 2 Up progressive |
| A015679_01 | At5g39880 | putative protein; protein id: At5g39880.1        | 0 | 0.40 | 1.38 | 1.9 | 0.11 | 2 Up progressive |
| A015723_01 | At5g17290 | AtAPG5; protein id: At5g17290.1                  | 0 | 0.78 | 1.41 | 2.6 | 0.05 | 2 Up progressive |
| A015883_01 | At5g14120 | nodulin-like protein; protein id: At5g14120.1    | 0 | 1.11 | 1.98 | 2.4 | 0.05 | 2 Up progressive |
| A015892_01 | At5g58070 | outer membrane lipoprotein - like; protein id: A | 0 | 0.61 | 1.24 | 2.0 | 0.08 | 2 Up progressive |
| A015963_01 | At5g64530 | putative protein; protein id: At5g64530.1        | 0 | 0.78 | 1.53 | 2.2 | 0.05 | 2 Up progressive |
| A015984_01 | At5g40450 | putative protein; protein id: At5g40450.1        | 0 | 1.93 | 3.11 | 2.6 | 0.05 | 2 Up progressive |
| A016048_01 | At5g63490 | putative protein; protein id: At5g63490.1        | 0 | 0.88 | 1.91 | 3.6 | 0.05 | 2 Up progressive |
| A016051_01 | At5g55620 | putative protein; protein id: At5g55620.1        | 0 | 0.89 | 2.33 | 1.4 | 1.11 | 2 Up progressive |
| A016127_01 | At5g23750 | putative protein; protein id: At5g23750.1        | 0 | 0.75 | 2.04 | 1.6 | 0.41 | 2 Up progressive |
| A016186_01 | At5g22090 | unknown protein; protein id: At5g22090.1         | 0 | 0.64 | 1.36 | 1.7 | 0.36 | 2 Up progressive |
| A016229_01 | At5g67030 | zeaxanthin epoxidase precursor (LOS6/ABA1        | 0 | 0.95 | 2.06 | 3.4 | 0.05 | 2 Up progressive |
| A016255_01 | At5g54130 | putative protein; protein id: At5g54130.1        | 0 | 0.57 | 1.40 | 1.6 | 0.36 | 2 Up progressive |
| A016278_01 | At5g61590 | ethylene responsive element binding factor - li  | 0 | 1.07 | 1.93 | 2.1 | 0.08 | 2 Up progressive |
| A016323_01 | At5g15850 | zinc finger protein CONSTANS-LIKE 1 (COL1        | 0 | 1.18 | 1.72 | 2.2 | 0.05 | 2 Up progressive |
| A016368_01 | At5g54960 | putative pyruvate decarboxylase                  | 0 | 1.07 | 1.59 | 1.2 | 2.11 | 2 Up progressive |

|            |           |                                                            |   |      |      |     |      |                  |
|------------|-----------|------------------------------------------------------------|---|------|------|-----|------|------------------|
| A016463_01 | At5g49480 | NaCl-inducible Ca <sup>2+</sup> -binding protein-like;almc | 0 | 0.53 | 1.85 | 2.0 | 0.08 | 2 Up progressive |
| A016472_01 | At5g46260 | disease resistance protein (TIR-NBS-LRR cla                | 0 | 0.93 | 2.34 | 1.2 | 2.11 | 2 Up progressive |
| A016586_01 | At5g06370 | putative protein; protein id: At5g06370.1                  | 0 | 0.73 | 1.62 | 1.3 | 1.42 | 2 Up progressive |
| A016612_01 | At5g01990 | putative protein; protein id: At5g01990.1                  | 0 | 0.54 | 1.12 | 1.8 | 0.19 | 2 Up progressive |
| A016618_01 | At5g03330 | putative protein; protein id: At5g03330.1                  | 0 | 1.13 | 1.64 | 1.9 | 0.17 | 2 Up progressive |
| A016628_01 | At5g54840 | SGP1 monomeric G-protein (emb CAB54517.                    | 0 | 1.23 | 2.73 | 1.5 | 0.75 | 2 Up progressive |
| A016644_01 | At5g18240 | transfactor-like protein; protein id: At5g18240.           | 0 | 0.57 | 1.12 | 1.6 | 0.36 | 2 Up progressive |
| A016652_01 | At5g18130 | putative protein; protein id: At5g18130.1                  | 0 | 1.89 | 2.88 | 3.1 | 0.05 | 2 Up progressive |
| A016731_01 | At5g35690 | putative protein; protein id: At5g35690.1                  | 0 | 0.45 | 1.37 | 2.3 | 0.05 | 2 Up progressive |
| A016738_01 | At5g11650 | lysophospholipase - like protein; protein id: At!          | 0 | 0.96 | 1.63 | 2.2 | 0.05 | 2 Up progressive |
| A016830_01 | At5g49890 | CLC-c chloride channel protein; protein id: At!            | 0 | 0.56 | 1.07 | 1.1 | 5.44 | 2 Up progressive |
| A016839_01 | At5g57520 | CCHH finger protein 2-like protein (pir  S5588;            | 0 | 0.91 | 2.25 | 3.5 | 0.05 | 2 Up progressive |
| A016904_01 | At5g11840 | putative protein; protein id: At5g11840.1                  | 0 | 0.94 | 2.09 | 3.2 | 0.05 | 2 Up progressive |
| A016943_01 | At5g02290 | serine/threonine-specific protein kinase NAK;              | 0 | 0.50 | 1.13 | 1.6 | 0.41 | 2 Up progressive |
| A016955_01 | At5g38895 | expressed protein; protein id: At5g38895.1                 | 0 | 0.90 | 1.65 | 2.4 | 0.05 | 2 Up progressive |
| A016956_01 | At5g45160 | GTP-binding protein-like; root hair defective 3            | 0 | 0.77 | 1.25 | 1.1 | 5.44 | 2 Up progressive |
| A016960_01 | At5g02880 | putative protein; protein id: At5g02880.1                  | 0 | 1.11 | 1.61 | 1.5 | 0.75 | 2 Up progressive |
| A016969_01 | At5g62570 | calmodulin-binding protein; protein id: At5g62!            | 0 | 0.95 | 1.57 | 1.8 | 0.23 | 2 Up progressive |
| A017034_01 | At5g02120 | one helix protein (OHP); protein id: At5g02120             | 0 | 0.33 | 1.07 | 1.5 | 0.47 | 2 Up progressive |
| A017069_01 | At5g43450 | 1-aminocyclopropane-1-carboxylate oxidase;                 | 0 | 1.88 | 3.81 | 1.6 | 0.41 | 2 Up progressive |
| A017073_01 | At5g23660 | MtN3-like protein; protein id: At5g23660.1                 | 0 | 1.54 | 2.77 | 4.2 | 0.05 | 2 Up progressive |
| A017100_01 | At5g04040 | expressed protein; protein id: At5g04040.1                 | 0 | 0.82 | 1.26 | 2.3 | 0.05 | 2 Up progressive |
| A017122_01 | At5g46790 | putative protein; protein id: At5g46790.1                  | 0 | 0.62 | 1.78 | 2.7 | 0.05 | 2 Up progressive |
| A017128_01 | At5g51070 | ATP-dependent Clp protease ATP-binding sul                 | 0 | 1.42 | 2.40 | 3.0 | 0.05 | 2 Up progressive |
| A017135_01 | At5g45880 | Ole e l (main olive allergen)-like protein; prote          | 0 | 0.49 | 1.50 | 1.7 | 0.36 | 2 Up progressive |
| A017340_01 | At5g39785 | expressed protein; protein id: At5g39785.1                 | 0 | 0.40 | 1.20 | 1.2 | 5.44 | 2 Up progressive |
| A017360_01 | At5g47860 | putative protein; protein id: At5g47860.1                  | 0 | 1.36 | 2.52 | 3.2 | 0.05 | 2 Up progressive |
| A017378_01 | At5g61960 | meiosis protein mei2-related; protein id: At5g!            | 0 | 0.47 | 1.00 | 1.2 | 2.11 | 2 Up progressive |
| A017394_01 | At5g65870 | putative protein; protein id: At5g65870.1                  | 0 | 1.04 | 1.89 | 1.8 | 0.23 | 2 Up progressive |
| A017434_01 | At5g23210 | serine carboxypeptidase II-like protein; proteir           | 0 | 0.51 | 1.03 | 1.5 | 0.60 | 2 Up progressive |
| A017451_01 | At5g12000 | putative receptor - like kinase; protein id: At5g          | 0 | 0.50 | 1.48 | 1.6 | 0.47 | 2 Up progressive |
| A017477_01 | At5g45350 | expressed protein; protein id: At5g45350.1                 | 0 | 1.18 | 2.36 | 2.6 | 0.05 | 2 Up progressive |
| A017652_01 | At5g53550 | EspB-like protein; protein id: At5g53550.1                 | 0 | 1.37 | 2.19 | 1.2 | 2.11 | 2 Up progressive |
| A017858_01 | At5g16630 | putative protein; protein id: At5g16630.1                  | 0 | 0.61 | 1.36 | 2.4 | 0.05 | 2 Up progressive |
| A017867_01 | At5g05110 | putative cysteine proteinase inhibitor                     | 0 | 1.26 | 2.26 | 3.1 | 0.05 | 2 Up progressive |
| A017868_01 | At5g56460 | protein kinase-like protein; protein id: At5g564           | 0 | 1.03 | 1.70 | 1.8 | 0.19 | 2 Up progressive |
| A017872_01 | At5g50380 | putative protein; protein id: At5g50380.1                  | 0 | 0.50 | 1.09 | 1.6 | 0.47 | 2 Up progressive |
| A017925_01 | At5g53450 | putative protein; protein id: At5g53450.1                  | 0 | 0.76 | 1.98 | 3.1 | 0.05 | 2 Up progressive |
| A017935_01 | At5g42310 | maize crp1 protein-like; protein id: At5g42310.            | 0 | 0.83 | 1.18 | 1.8 | 0.17 | 2 Up progressive |
| A017936_01 | At5g59220 | protein phosphatase 2C (PP2C); protein id: At!             | 0 | 0.91 | 1.38 | 1.3 | 1.42 | 2 Up progressive |
| A017980_01 | At5g50100 | putative protein; protein id: At5g50100.1                  | 0 | 0.75 | 1.69 | 2.1 | 0.08 | 2 Up progressive |
| A017993_01 | At5g43850 | putative protein; protein id: At5g43850.1                  | 0 | 0.97 | 1.62 | 2.5 | 0.05 | 2 Up progressive |
| A018034_01 | At5g10030 | bZIP transcription factor, OBF4; protein id: At!           | 0 | 0.75 | 2.00 | 1.2 | 2.11 | 2 Up progressive |
| A018052_01 | At5g61210 | syntaxin SNAP33; protein id: At5g61210.1                   | 0 | 0.56 | 1.07 | 1.3 | 1.11 | 2 Up progressive |
| A018068_01 | At5g65110 | acyl-CoA oxidase (gb AAC13497.1); protein ic               | 0 | 0.76 | 1.24 | 1.3 | 1.11 | 2 Up progressive |

|            |           |                                                    |   |      |      |     |      |                  |
|------------|-----------|----------------------------------------------------|---|------|------|-----|------|------------------|
| A018085_01 | At5g04850 | expressed protein; protein id: At5g04850.1         | 0 | 0.93 | 1.47 | 2.3 | 0.05 | 2 Up progressive |
| A018089_01 | At5g09660 | microbody NAD-dependent malate dehydroge           | 0 | 0.85 | 1.32 | 1.8 | 0.19 | 2 Up progressive |
| A018103_01 | xxxx      | b/t hypothetical protein; protein id: At5g24710.   | 0 | 0.69 | 1.11 | 2.1 | 0.08 | 2 Up progressive |
| A018139_01 | At5g13770 | putative protein; protein id: At5g13770.1          | 0 | 0.90 | 1.67 | 3.4 | 0.05 | 2 Up progressive |
| A018156_01 | At5g57350 | plasma membrane ATPase 3 (proton pump) (           | 0 | 0.91 | 1.84 | 2.3 | 0.05 | 2 Up progressive |
| A018189_01 | At5g04080 | putative protein; protein id: At5g04080.1          | 0 | 0.87 | 2.51 | 1.6 | 0.41 | 2 Up progressive |
| A018206_01 | At5g02630 | putative protein; protein id: At5g02630.1          | 0 | 0.48 | 1.25 | 1.2 | 2.11 | 2 Up progressive |
| A018258_01 | At5g39080 | acyltransferase -like protein; protein id: At5g39  | 0 | 0.84 | 1.42 | 2.3 | 0.05 | 2 Up progressive |
| A018270_01 | At5g24120 | sigma-like factor (emb CAA77213.1); protein i      | 0 | 1.32 | 2.69 | 2.8 | 0.05 | 2 Up progressive |
| A018272_01 | At5g40470 | putative protein; protein id: At5g40470.1          | 0 | 0.48 | 1.23 | 1.5 | 0.60 | 2 Up progressive |
| A018280_01 | At5g37070 | putative protein; protein id: At5g37070.1          | 0 | 0.88 | 1.55 | 2.3 | 0.05 | 2 Up progressive |
| A018307_01 | At5g55850 | NOI protein, nitrate-induced; protein id: At5g55   | 0 | 0.41 | 1.09 | 1.5 | 0.60 | 2 Up progressive |
| A018319_01 | At5g41400 | RING zinc finger protein-like; protein id: At5g4   | 0 | 0.72 | 1.22 | 1.2 | 2.11 | 2 Up progressive |
| A018384_01 | At5g61560 | putative protein; protein id: At5g61560.1          | 0 | 0.75 | 1.09 | 1.3 | 1.42 | 2 Up progressive |
| A018423_01 | At5g58120 | disease resistance protein (TIR-NBS-LRR cla        | 0 | 1.30 | 2.13 | 2.7 | 0.05 | 2 Up progressive |
| A018564_01 | At5g04880 | unknown protein; protein id: At5g04880.1           | 0 | 0.85 | 1.48 | 2.3 | 0.05 | 2 Up progressive |
| A018581_01 | At5g52450 | efflux family protein, putative; protein id: At5g5 | 0 | 0.71 | 1.70 | 2.7 | 0.05 | 2 Up progressive |
| A018625_01 | At5g12400 | putative protein; protein id: At5g12400.1          | 0 | 1.87 | 2.74 | 3.6 | 0.05 | 2 Up progressive |
| A018715_01 | At5g10750 | putative protein; protein id: At5g10750.1          | 0 | 1.22 | 2.56 | 3.2 | 0.05 | 2 Up progressive |
| A018753_01 | At5g05220 | expressed protein; protein id: At5g05220.1         | 0 | 0.70 | 1.28 | 2.0 | 0.08 | 2 Up progressive |
| A018827_01 | At5g54870 | putative protein; protein id: At5g54870.1          | 0 | 1.12 | 2.18 | 2.5 | 0.05 | 2 Up progressive |
| A018841_01 | At5g57040 | putative protein; protein id: At5g57040.1          | 0 | 0.67 | 1.53 | 3.3 | 0.05 | 2 Up progressive |
| A018911_01 | At5g19140 | aluminium-induced protein - like; protein id: At   | 0 | 1.27 | 2.80 | 3.2 | 0.05 | 2 Up progressive |
| A018937_01 | At5g41800 | amino acid permease-like protein; proline tran     | 0 | 1.15 | 3.35 | 1.7 | 0.23 | 2 Up progressive |
| A019000_01 | At5g67370 | putative protein; protein id: At5g67370.1          | 0 | 1.13 | 1.82 | 3.6 | 0.05 | 2 Up progressive |
| A019014_01 | At5g47560 | sodium-dicarboxylate cotransporter-like; prote     | 0 | 1.18 | 2.32 | 3.1 | 0.05 | 2 Up progressive |
| A019046_01 | At5g57630 | SNF1 related protein kinase-like protein; prote    | 0 | 1.59 | 2.41 | 2.6 | 0.05 | 2 Up progressive |
| A019057_01 | At5g43260 | expressed protein; protein id: At5g43260.1         | 0 | 1.48 | 2.33 | 3.6 | 0.05 | 2 Up progressive |
| A019213_01 | At5g51180 | unknown protein                                    | 0 | 0.73 | 1.48 | 1.7 | 0.27 | 2 Up progressive |
| A019252_01 | At5g11060 | homeobox protein knotted-1 like 4 (KNAT4); p       | 0 | 1.22 | 2.09 | 2.7 | 0.05 | 2 Up progressive |
| A019383_01 | At5g14880 | putative cation transport protein; protein id: At  | 0 | 0.93 | 1.52 | 2.6 | 0.05 | 2 Up progressive |
| A019444_01 | At3g08690 | E2, ubiquitin-conjugating enzyme 11 (UBC11)        | 0 | 0.43 | 1.29 | 1.6 | 0.41 | 2 Up progressive |
| A019457_01 | At2g18170 | MAP kinase (ATMPK7); protein id: At2g18170         | 0 | 0.60 | 1.35 | 2.2 | 0.05 | 2 Up progressive |
| A019515_01 | At4g17840 | expressed protein; protein id: At4g17840.1         | 0 | 1.14 | 2.11 | 2.8 | 0.05 | 2 Up progressive |
| A019560_01 | At4g26060 | putative protein; protein id: At4g26060.1          | 0 | 1.05 | 2.14 | 1.4 | 0.75 | 2 Up progressive |
| A019572_01 | At4g23850 | acyl-CoA synthetase - like protein; protein id: ,  | 0 | 0.31 | 1.01 | 1.4 | 0.75 | 2 Up progressive |
| A019636_01 | xxxx      | b/t protein phosphatase 2A regulatory subunit      | 0 | 0.42 | 1.30 | 1.4 | 1.11 | 2 Up progressive |
| A019663_01 | At3g23570 | expressed protein; protein id: At3g23570.1         | 0 | 0.61 | 1.93 | 2.1 | 0.08 | 2 Up progressive |
| A019686_01 | At5g53030 | putative protein; protein id: At5g53030.1          | 0 | 0.56 | 1.81 | 2.0 | 0.08 | 2 Up progressive |
| A019692_01 | At5g63580 | flavonol synthase; protein id: At5g63580.1         | 0 | 1.20 | 3.93 | 1.9 | 0.11 | 2 Up progressive |
| A019698_01 | At5g63790 | putative protein; protein id: At5g63790.1          | 0 | 1.30 | 2.73 | 2.7 | 0.05 | 2 Up progressive |
| A019781_01 | At2g46830 | myb-related transcription factor (CCA1); prote     | 0 | 0.54 | 1.75 | 1.9 | 0.17 | 2 Up progressive |
| A019831_01 | At2g45910 | putative protein kinase; protein id: At2g45910.    | 0 | 0.51 | 1.47 | 1.4 | 0.75 | 2 Up progressive |
| A019892_01 | At1g78290 | serine-threonine protein kinase, putative; prot    | 0 | 1.92 | 2.81 | 3.3 | 0.05 | 2 Up progressive |
| A019926_01 | At1g77920 | bZIP transcription factor, bZIP50; protein id: A   | 0 | 1.29 | 1.88 | 2.1 | 0.05 | 2 Up progressive |



|            |           |                                                    |   |      |      |     |      |                  |
|------------|-----------|----------------------------------------------------|---|------|------|-----|------|------------------|
| A019940_01 | At1g06430 | FtsH protease, putative; protein id: At1g06430     | 0 | 0.93 | 1.71 | 2.4 | 0.05 | 2 Up progressive |
| A019958_01 | At1g29970 | 60S ribosomal protein L18A, putative; protein      | 0 | 0.73 | 1.11 | 2.2 | 0.05 | 2 Up progressive |
| A019985_01 | At3g19800 | expressed protein; protein id: At3g19800.1         | 0 | 0.89 | 1.38 | 2.5 | 0.05 | 2 Up progressive |
| A020033_01 | At3g21690 | integral membrane protein, putative; protein ic    | 0 | 0.69 | 2.30 | 3.1 | 0.05 | 2 Up progressive |
| A020045_01 | At3g26740 | light regulated protein, putative; protein id: At3 | 0 | 1.61 | 2.29 | 3.5 | 0.05 | 2 Up progressive |
| A020053_01 | At3g14067 | subtilisin-like serine protease, putative; proteir | 0 | 1.24 | 1.90 | 1.8 | 0.19 | 2 Up progressive |
| A020055_01 | At5g66052 | expressed protein; protein id: At5g66052.1         | 0 | 0.69 | 1.00 | 1.5 | 0.60 | 2 Up progressive |
| A020062_01 | At1g54290 | protein translation factor Sui1 homolog, putati    | 0 | 1.08 | 2.03 | 2.8 | 0.05 | 2 Up progressive |
| A020065_01 | At5g62680 | peptide transporter; protein id: At5g62680.1       | 0 | 0.78 | 1.89 | 1.7 | 0.27 | 2 Up progressive |
| A020103_01 | At3g54600 | putative protein; protein id: At3g54600.1          | 0 | 0.47 | 1.45 | 1.8 | 0.23 | 2 Up progressive |
| A020105_01 | At5g04760 | l-box binding factor - like protein; protein id: A | 0 | 1.43 | 2.47 | 2.7 | 0.05 | 2 Up progressive |
| A020116_01 | At5g12170 | putative protein; protein id: At5g12170.1          | 0 | 0.83 | 1.60 | 2.5 | 0.05 | 2 Up progressive |
| A020121_01 | At4g31450 | putative protein; protein id: At4g31450.1          | 0 | 0.60 | 1.65 | 2.8 | 0.05 | 2 Up progressive |
| A020126_01 | At5g59960 | putative protein; protein id: At5g59960.1          | 0 | 1.14 | 1.67 | 2.0 | 0.08 | 2 Up progressive |
| A020157_01 | At5g27600 | long-chain-fatty-acid--CoA ligase-like protein;    | 0 | 0.74 | 1.29 | 1.4 | 1.11 | 2 Up progressive |
| A020160_01 | At1g33970 | expressed protein; protein id: At1g33970.1         | 0 | 0.85 | 1.69 | 1.7 | 0.36 | 2 Up progressive |
| A020192_01 | At2g27150 | aldehyde oxidase; protein id: At2g27150.1          | 0 | 1.57 | 2.49 | 2.7 | 0.05 | 2 Up progressive |
| A020225_01 | At3g62550 | putative protein; protein id: At3g62550.1          | 0 | 1.55 | 2.74 | 3.2 | 0.05 | 2 Up progressive |
| A020241_01 | At5g61530 | auxin-regulated protein; protein id: At5g61530     | 0 | 0.52 | 1.07 | 2.0 | 0.08 | 2 Up progressive |
| A020243_01 | At1g07230 | unknown protein; protein id: At1g07230.1           | 0 | 0.36 | 1.01 | 2.3 | 0.05 | 2 Up progressive |
| A020289_01 | At1g21680 | expressed protein; protein id: At1g21680.1         | 0 | 1.40 | 2.09 | 2.4 | 0.05 | 2 Up progressive |
| A020317_01 | At4g27410 | putative protein; protein id: At4g27410.2          | 0 | 2.20 | 3.14 | 2.5 | 0.05 | 2 Up progressive |
| A020342_01 | At2g05630 | AtAPG8d; putative microtubule-associated pro       | 0 | 0.61 | 1.18 | 1.8 | 0.19 | 2 Up progressive |
| A020352_01 | At4g39090 | cysteine proteinase RD19A; protein id: At4g39      | 0 | 1.68 | 2.38 | 2.6 | 0.05 | 2 Up progressive |
| A020371_01 | At1g75100 | expressed protein; protein id: At1g75100.1         | 0 | 1.00 | 1.68 | 1.7 | 0.36 | 2 Up progressive |
| A020419_01 | At2g16740 | E2, ubiquitin-conjugating enzyme, putative; pr     | 0 | 0.69 | 2.26 | 3.0 | 0.05 | 2 Up progressive |
| A020420_01 | At1g55450 | expressed protein; protein id: At1g55450.1         | 0 | 0.85 | 2.35 | 1.6 | 0.41 | 2 Up progressive |
| A020438_01 | At4g37200 | thiol-disulfide interchange like protein; protein  | 0 | 0.50 | 1.17 | 1.8 | 0.19 | 2 Up progressive |
| A020497_01 | At2g47910 | expressed protein; protein id: At2g47910.1         | 0 | 0.53 | 1.24 | 2.5 | 0.05 | 2 Up progressive |
| A020509_01 | At3g19010 | expressed protein; protein id: At3g19010.1         | 0 | 0.99 | 1.62 | 2.0 | 0.08 | 2 Up progressive |
| A020529_01 | At3g11410 | hypothetical protein; protein id: At3g11380.1      | 0 | 0.95 | 1.80 | 2.4 | 0.05 | 2 Up progressive |
| A020551_01 | At4g03260 | putative protein phosphatase regulatory subur      | 0 | 0.42 | 1.04 | 1.5 | 0.60 | 2 Up progressive |
| A020588_01 | At3g60690 | putative protein; protein id: At3g60690.1          | 0 | 1.95 | 2.98 | 4.1 | 0.05 | 2 Up progressive |
| A020589_01 | At5g65210 | bZIP transcription factor, TGA1; protein id: Atf   | 0 | 2.08 | 3.29 | 3.9 | 0.05 | 2 Up progressive |
| A020602_01 | At2g39940 | coronatine-insensitive 1 (COI1), AtFBL2; prote     | 0 | 0.65 | 1.14 | 1.9 | 0.17 | 2 Up progressive |
| A020603_01 | At5g06530 | ABC transporter family protein; protein id: At5g   | 0 | 1.14 | 2.36 | 1.9 | 0.11 | 2 Up progressive |
| A020605_01 | At2g25450 | putative dioxygenase; protein id: At2g25450.1      | 0 | 2.79 | 4.15 | 4.0 | 0.05 | 2 Up progressive |
| A020613_01 | At4g13550 | putative protein; protein id: At4g13550.1          | 0 | 0.64 | 2.10 | 4.1 | 0.05 | 2 Up progressive |
| A020708_01 | At1g74910 | putative GDP-mannose pyrophosphorylase; p          | 0 | 0.60 | 1.04 | 1.5 | 0.60 | 2 Up progressive |
| A020710_01 | At1g71030 | myb family transcription factor; protein id: At1g  | 0 | 1.45 | 2.13 | 4.1 | 0.05 | 2 Up progressive |
| A020756_01 | At3g03270 | expressed protein; protein id: At3g03270.1         | 0 | 0.97 | 1.52 | 2.7 | 0.05 | 2 Up progressive |
| A020761_01 | At3g30390 | expressed protein; protein id: At3g30390.1         | 0 | 0.87 | 1.32 | 1.5 | 0.47 | 2 Up progressive |
| A020765_01 | At2g22690 | expressed protein; protein id: At2g22690.1         | 0 | 0.61 | 1.05 | 1.6 | 0.36 | 2 Up progressive |
| A020771_01 | At5g53350 | ATP-dependent Clp protease ATP-binding sul         | 0 | 0.80 | 1.20 | 1.5 | 0.47 | 2 Up progressive |
| A020784_01 | At5g57050 | protein phosphatase 2C, ABI2; protein id: At5g     | 0 | 0.93 | 1.73 | 2.4 | 0.05 | 2 Up progressive |

|            |               |                                                     |   |      |      |     |      |                  |
|------------|---------------|-----------------------------------------------------|---|------|------|-----|------|------------------|
| A020819_01 | At3g48000     | aldehyde dehydrogenase (NAD+)-like protein;         | 0 | 0.63 | 1.67 | 3.2 | 0.05 | 2 Up progressive |
| A020827_01 | At3g47730     | ABC transporter family protein; protein id: At3g    | 0 | 0.60 | 1.42 | 1.3 | 1.42 | 2 Up progressive |
| A020917_01 | At1g75380     | wound-responsive protein, putative; protein id      | 0 | 1.13 | 2.70 | 3.3 | 0.05 | 2 Up progressive |
| A020929_01 | At1g01490     | expressed protein; protein id: At1g01490.1          | 0 | 1.21 | 2.06 | 2.7 | 0.05 | 2 Up progressive |
| A020960_01 | At5g07470     | peptide methionine sulfoxide reductase (msr);       | 0 | 0.60 | 1.37 | 1.8 | 0.17 | 2 Up progressive |
| A020971_01 | At5g42180     | peroxidase, putative; protein id: At5g42180.1       | 0 | 1.02 | 2.18 | 1.2 | 2.11 | 2 Up progressive |
| A020992_01 | At4g15545     | expressed protein; protein id: At4g15545.1          | 0 | 0.92 | 1.34 | 1.8 | 0.19 | 2 Up progressive |
| A021058_01 | At5g64280     | 2-oxoglutarate/malate translocator; protein id:     | 0 | 0.59 | 1.64 | 2.5 | 0.05 | 2 Up progressive |
| A021071_01 | At4g37790     | homeobox protein HAT22; protein id: At4g377         | 0 | 1.16 | 2.12 | 2.1 | 0.08 | 2 Up progressive |
| A021086_01 | At1g06650     | oxidoreductase, putative; protein id: At1g0665      | 0 | 0.68 | 1.42 | 2.4 | 0.05 | 2 Up progressive |
| A021129_01 | At1g59870     | A.t. fasciclin-like arabinogalactan-protein 9 (F    | 0 | 0.87 | 2.28 | 3.4 | 0.05 | 2 Up progressive |
| A021142_01 | not annotated | Chr1 W/13147608-13147677 downstream of ,            | 0 | 0.58 | 1.54 | 1.8 | 0.19 | 2 Up progressive |
| A021147_01 | At5g07220     | putative protein; protein id: At5g07220.1           | 0 | 0.94 | 1.48 | 1.5 | 0.60 | 2 Up progressive |
| A021249_01 | At1g07610     | metallothionein-like protein; protein id: At1g07    | 0 | 1.24 | 3.78 | 2.9 | 0.05 | 2 Up progressive |
| A021309_01 | At4g01060     | myb family transcription factor; protein id: At4g   | 0 | 1.34 | 2.82 | 2.7 | 0.05 | 2 Up progressive |
| A021466_01 | At5g38760     | pollen coat -like protein; protein id: At5g38760    | 0 | 0.69 | 1.43 | 1.9 | 0.17 | 2 Up progressive |
| A021520_01 | At2g02390     | glutathione transferase, putative; protein id: At   | 0 | 1.17 | 1.96 | 1.9 | 0.11 | 2 Up progressive |
| A021562_01 | At1g13990     | expressed protein; protein id: At1g13990.1          | 0 | 2.00 | 3.10 | 3.6 | 0.05 | 2 Up progressive |
| A021589_01 | At2g26750     | putative epoxide hydrolase; protein id: At2g26      | 0 | 0.67 | 1.16 | 1.8 | 0.23 | 2 Up progressive |
| A021594_01 | At2g29320     | putative tropinone reductase; protein id: At2g2     | 0 | 0.97 | 1.83 | 3.2 | 0.05 | 2 Up progressive |
| A021607_01 | At2g24040     | unknown protein; protein id: At2g24040.1            | 0 | 0.80 | 1.60 | 2.0 | 0.08 | 2 Up progressive |
| A021635_01 | At2g09970     | unknown protein; protein id: At2g09970.1            | 0 | 1.15 | 1.86 | 1.1 | 5.44 | 2 Up progressive |
| A021670_01 | At1g13990     | expressed protein; protein id: At1g13990.1          | 0 | 2.23 | 3.25 | 4.8 | 0.05 | 2 Up progressive |
| A021709_01 | At1g49660     | unknown protein; protein id: At1g49660.1            | 0 | 0.77 | 2.38 | 1.6 | 0.47 | 2 Up progressive |
| A021820_01 | At3g26280     | cytochrome p450 family; protein id: At3g26280       | 0 | 1.21 | 3.53 | 4.7 | 0.05 | 2 Up progressive |
| A021843_01 | At5g65110     | acyl-CoA oxidase (gb AAC13497.1); protein id:       | 0 | 0.66 | 1.16 | 1.6 | 0.47 | 2 Up progressive |
| A021850_01 | At1g69410     | eukaryotic initiation factor 5A , putative; protei  | 0 | 0.66 | 1.52 | 1.5 | 0.60 | 2 Up progressive |
| A021873_01 | At5g18630     | triacylglycerol lipase-like protein; protein id: At | 0 | 1.37 | 2.09 | 3.6 | 0.05 | 2 Up progressive |
| A021874_01 | At3g19800     | expressed protein; protein id: At3g19800.1          | 0 | 1.19 | 1.95 | 2.7 | 0.05 | 2 Up progressive |
| A021907_01 | At1g72510     | arabinogalactan-protein (AGP20); protein id: A      | 0 | 0.81 | 1.43 | 2.1 | 0.08 | 2 Up progressive |
| A021913_01 | xxxx          | b/t pseudogene, putative retroelement pol poly      | 0 | 1.26 | 2.64 | 3.1 | 0.05 | 2 Up progressive |
| A021922_01 | At1g10500     | unknown protein; protein id: At1g10500.1            | 0 | 0.58 | 1.61 | 2.5 | 0.05 | 2 Up progressive |
| A021942_01 | At1g13990     | expressed protein; protein id: At1g13990.1          | 0 | 2.10 | 3.21 | 3.6 | 0.05 | 2 Up progressive |
| A021993_01 | At4g21980     | AtAPG8a; symbiosis-related like protein; prote      | 0 | 1.16 | 1.82 | 2.0 | 0.08 | 2 Up progressive |
| A022015_01 | At5g56150     | E2, ubiquitin-conjugating enzyme, putative; pr      | 0 | 0.47 | 1.34 | 1.6 | 0.36 | 2 Up progressive |
| A022029_01 | At4g05050     | polyubiquitin UBQ11; protein id: At4g05050.1        | 0 | 0.84 | 1.24 | 1.2 | 2.11 | 2 Up progressive |
| A022077_01 | At3g28070     | unknown protein; protein id: At3g28070.1            | 0 | 0.70 | 2.23 | 2.4 | 0.05 | 2 Up progressive |
| A022105_01 | At1g49200     | RING-H2 finger protein RHA3a, putative; prote       | 0 | 1.82 | 2.80 | 1.2 | 2.11 | 2 Up progressive |
| A022112_01 | At2g39890     | proline transporter 1; protein id: At2g39890.1      | 0 | 0.71 | 1.67 | 1.9 | 0.17 | 2 Up progressive |
| A022120_01 | At3g08720     | putative ribosomal-protein S6 kinase (ATPK15        | 0 | 0.63 | 1.22 | 1.3 | 1.11 | 2 Up progressive |
| A022283_01 | At4g28370     | hypothetical protein; protein id: At4g28370.1       | 0 | 0.62 | 1.34 | 1.2 | 2.11 | 2 Up progressive |
| A022306_01 | At4g32320     | ascorbate peroxidase family; protein id: At4g3      | 0 | 0.55 | 1.46 | 2.7 | 0.05 | 2 Up progressive |
| A022436_01 | At4g37560     | formamidase - like protein; protein id: At4g375     | 0 | 1.33 | 2.30 | 2.2 | 0.05 | 2 Up progressive |
| A022543_01 | At4g01430     | unknown protein; protein id: At4g01430.1            | 0 | 0.86 | 1.76 | 1.3 | 1.42 | 2 Up progressive |
| A022619_01 | At4g16630     | DEAD/DEAH box RNA helicase, putative; prof          | 0 | 1.26 | 2.62 | 1.1 | 5.44 | 2 Up progressive |

|            |           |                                                        |   |      |      |     |      |                  |
|------------|-----------|--------------------------------------------------------|---|------|------|-----|------|------------------|
| A022624_01 | At4g17780 | similar to putative myb-related transcription fa       | 0 | 0.99 | 1.92 | 1.3 | 1.42 | 2 Up progressive |
| A022808_01 | At3g28520 | hypothetical protein; protein id: At3g28520.1          | 0 | 0.77 | 1.30 | 2.1 | 0.05 | 2 Up progressive |
| A022948_01 | At5g43630 | unknown protein; protein id: At5g43630.1               | 0 | 0.89 | 1.67 | 1.4 | 1.11 | 2 Up progressive |
| A022987_01 | At5g38510 | putative protein; protein id: At5g38510.1              | 0 | 0.60 | 1.64 | 3.0 | 0.05 | 2 Up progressive |
| A023159_01 | At1g26970 | protein kinase, putative; protein id: At1g26970        | 0 | 0.85 | 1.30 | 1.7 | 0.36 | 2 Up progressive |
| A023228_01 | At1g23840 | expressed protein; protein id: At1g23840.1             | 0 | 0.70 | 1.56 | 1.7 | 0.23 | 2 Up progressive |
| A023242_01 | At1g54090 | hypothetical protein; protein id: At1g54090.1          | 0 | 1.15 | 1.64 | 1.7 | 0.27 | 2 Up progressive |
| A023252_01 | At1g20880 | RRM-containing protein; protein id: At1g20880          | 0 | 0.60 | 1.00 | 1.2 | 2.11 | 2 Up progressive |
| A023259_01 | At1g10300 | putative GTP-binding protein; protein id: At1g10300    | 0 | 0.83 | 1.61 | 2.4 | 0.05 | 2 Up progressive |
| A023354_01 | At2g23200 | putative protein kinase; protein id: At2g23200         | 0 | 0.89 | 2.09 | 2.5 | 0.05 | 2 Up progressive |
| A023440_01 | At2g38410 | unknown protein; protein id: At2g38410.1               | 0 | 0.56 | 1.75 | 3.1 | 0.05 | 2 Up progressive |
| A023491_01 | At2g18860 | unknown protein; protein id: At2g18860.1               | 0 | 0.47 | 1.17 | 1.6 | 0.47 | 2 Up progressive |
| A023523_01 | At2g31960 | callose synthase (1,3-beta-glucan synthase) f          | 0 | 0.34 | 1.03 | 1.2 | 2.11 | 2 Up progressive |
| A023896_01 | At1g64610 | hypothetical protein; protein id: At1g64610.1          | 0 | 0.75 | 1.68 | 1.3 | 1.42 | 2 Up progressive |
| A023943_01 | At1g26120 | hypothetical protein; protein id: At1g26120.1          | 0 | 0.35 | 1.04 | 1.5 | 0.47 | 2 Up progressive |
| A024026_01 | At1g70580 | putative alanine aminotransferase; protein id:         | 0 | 0.52 | 1.53 | 2.8 | 0.05 | 2 Up progressive |
| A024107_01 | At1g23440 | hypothetical protein; protein id: At1g23440.1          | 0 | 1.01 | 1.79 | 2.4 | 0.05 | 2 Up progressive |
| A024182_01 | At1g05560 | UDP-glucose transferase(UGT1); protein id: A           | 0 | 1.82 | 3.02 | 2.9 | 0.05 | 2 Up progressive |
| A024195_01 | At1g51500 | ABC transporter family protein; protein id: At1        | 0 | 0.69 | 1.28 | 2.3 | 0.05 | 2 Up progressive |
| A024232_01 | At1g01780 | LIM domain protein, putative; protein id: At1g0        | 0 | 0.72 | 1.13 | 1.8 | 0.23 | 2 Up progressive |
| A024326_01 | At5g56870 | glycosyl hydrolase family 35 (beta-galactosida         | 0 | 2.78 | 4.57 | 5.0 | 0.05 | 2 Up progressive |
| A024331_01 | At1g24300 | unknown protein; protein id: At1g24300.1               | 0 | 0.56 | 1.01 | 1.2 | 2.11 | 2 Up progressive |
| A024372_01 | At3g27020 | expressed protein; protein id: At3g27020.1             | 0 | 0.93 | 1.61 | 1.9 | 0.17 | 2 Up progressive |
| A024373_01 | At3g20083 | pseudogene, cytochrome P450; protein id: At3           | 0 | 1.56 | 2.30 | 2.6 | 0.05 | 2 Up progressive |
| A024421_01 | At5g02020 | putative protein; protein id: At5g02020.1              | 0 | 1.59 | 2.96 | 3.2 | 0.05 | 2 Up progressive |
| A024430_01 | At3g42640 | plasma membrane H <sup>+</sup> -ATPase-like protein; p | 0 | 0.36 | 1.07 | 1.2 | 2.11 | 2 Up progressive |
| A024435_01 | At5g54940 | translation initiation factor-like protein; protein    | 0 | 1.21 | 1.84 | 2.4 | 0.05 | 2 Up progressive |
| A024442_01 | At2g24420 | expressed protein; protein id: At2g24420.1             | 0 | 0.49 | 1.07 | 1.7 | 0.27 | 2 Up progressive |
| A024465_01 | At3g28050 | expressed protein; protein id: At3g28050.1             | 0 | 0.70 | 1.06 | 1.2 | 2.11 | 2 Up progressive |
| A024481_01 | At4g17340 | membrane channel like protein; protein id: At4         | 0 | 0.61 | 2.01 | 2.9 | 0.05 | 2 Up progressive |
| A024484_01 | At1g68660 | expressed protein; protein id: At1g68660.1             | 0 | 0.66 | 1.50 | 2.8 | 0.05 | 2 Up progressive |
| A024496_01 | At5g13720 | unknown protein; protein id: At5g13720.1               | 0 | 0.68 | 1.23 | 2.6 | 0.05 | 2 Up progressive |
| A024509_01 | At4g23430 | putative protein; protein id: At4g23430.1              | 0 | 0.49 | 1.61 | 2.6 | 0.05 | 2 Up progressive |
| A024514_01 | At4g35090 | catalase 2; protein id: At4g35090.1                    | 0 | 0.72 | 1.45 | 2.1 | 0.05 | 2 Up progressive |
| A024518_01 | At2g25070 | protein phosphatase 2C (PP2C); protein id: At          | 0 | 0.58 | 1.21 | 1.8 | 0.19 | 2 Up progressive |
| A024557_01 | At1g27730 | salt-tolerance zinc finger protein; protein id: At     | 0 | 1.27 | 2.64 | 1.4 | 1.11 | 2 Up progressive |
| A024580_01 | At5g11680 | unknown protein                                        | 0 | 0.70 | 1.08 | 1.4 | 0.75 | 2 Up progressive |
| A024610_01 | At4g19840 | lectin like protein; protein id: At4g19840.1           | 0 | 1.55 | 2.53 | 2.5 | 0.05 | 2 Up progressive |
| A024611_01 | At4g31550 | putative putative DNA-binding protein                  | 0 | 0.55 | 1.10 | 1.2 | 5.44 | 2 Up progressive |
| A024612_01 | At5g53160 | putative protein; protein id: At5g53160.1              | 0 | 1.00 | 1.63 | 1.7 | 0.23 | 2 Up progressive |
| A024622_01 | At2g18960 | plasma membrane proton ATPase (PMA); p                 | 0 | 0.61 | 1.10 | 1.2 | 2.11 | 2 Up progressive |
| A024661_01 | At5g45710 | heat shock transcription factor; protein id: At5       | 0 | 0.46 | 1.02 | 1.5 | 0.47 | 2 Up progressive |
| A024663_01 | At1g14370 | protein kinase; protein id: At1g14370.1                | 0 | 1.63 | 2.81 | 3.1 | 0.05 | 2 Up progressive |
| A024664_01 | At3g10450 | putative glucose acyltransferase; protein id: A        | 0 | 1.28 | 2.47 | 3.2 | 0.05 | 2 Up progressive |
| A024862_01 | At5g09690 | putative protein; protein id: At5g09690.1              | 0 | 0.51 | 1.28 | 2.1 | 0.08 | 2 Up progressive |

|            |           |                                                    |   |      |      |     |      |   |                        |
|------------|-----------|----------------------------------------------------|---|------|------|-----|------|---|------------------------|
| A024890_01 | At4g23180 | serine/threonine kinase -like protein; protein id: | 0 | 0.69 | 1.16 | 1.5 | 0.47 | 2 | Up progressive         |
| A025060_01 | At3g44300 | nitrilase 2; protein id: At3g44300.1               | 0 | 2.89 | 4.77 | 3.4 | 0.05 | 2 | Up progressive         |
| A025061_01 | At3g28100 | unknown protein; protein id: At3g28100.1           | 0 | 1.58 | 4.12 | 4.6 | 0.05 | 2 | Up progressive         |
| A025092_01 | At3g20940 | cytochrome P450, putative; protein id: At3g20      | 0 | 0.58 | 1.83 | 1.3 | 1.42 | 2 | Up progressive         |
| A025268_01 | At1g08930 | zinc finger protein ATZF1, putative; protein id:   | 0 | 1.04 | 2.26 | 2.2 | 0.05 | 2 | Up progressive         |
| A025372_01 | At5g35450 | disease resistance protein (CC-NBS-LRR clas        | 0 | 1.03 | 2.00 | 2.9 | 0.05 | 2 | Up progressive         |
| A025406_01 | At2g32530 | putative cellulose synthase; protein id: At2g32    | 0 | 1.61 | 2.62 | 1.1 | 5.44 | 2 | Up progressive         |
| A025588_01 | At1g28610 | lipase, putative; protein id: At1g28610.1          | 0 | 0.65 | 2.28 | 3.2 | 0.05 | 2 | Up progressive         |
| A025727_01 | At4g37560 | formamidase - like protein; protein id: At4g375    | 0 | 1.65 | 2.87 | 2.0 | 0.08 | 2 | Up progressive         |
| A025739_01 | At1g73310 | putative serine carboxypeptidase; protein id: A    | 0 | 1.73 | 2.78 | 3.4 | 0.05 | 2 | Up progressive         |
| A025768_01 | At2g33590 | putative cinnamoyl-CoA reductase; protein id:      | 0 | 0.83 | 1.40 | 1.9 | 0.17 | 2 | Up progressive         |
| A025770_01 | At3g14690 | cytochrome P450, putative; protein id: At3g14      | 0 | 0.69 | 1.47 | 2.5 | 0.05 | 2 | Up progressive         |
| A025787_01 | At3g05165 | expressed protein; protein id: At3g05165.1         | 0 | 0.80 | 2.03 | 2.4 | 0.05 | 2 | Up progressive         |
| A025788_01 | At3g14415 | glycolate oxidase; protein id: At3g14415.1         | 0 | 0.86 | 1.48 | 2.3 | 0.05 | 2 | Up progressive         |
| A025922_01 | At4g27830 | glycosyl hydrolase family 1; protein id: At4g27    | 0 | 0.47 | 1.32 | 1.9 | 0.17 | 2 | Up progressive         |
| A025947_01 | At1g72900 | disease resistance protein (TIR-NBS class), p      | 0 | 1.48 | 2.14 | 1.9 | 0.17 | 2 | Up progressive         |
| A025949_01 | At3g14420 | glycolate oxidase, putative; protein id: At3g14    | 0 | 0.72 | 1.06 | 1.4 | 0.75 | 2 | Up progressive         |
| A025961_01 | At4g34180 | putative protein; protein id: At4g34180.1          | 0 | 0.59 | 1.62 | 2.7 | 0.05 | 2 | Up progressive         |
| A026004_01 | At5g48620 | disease resistance protein (CC-NBS-LRR clas        | 0 | 1.03 | 1.83 | 2.7 | 0.05 | 2 | Up progressive         |
| A026082_01 | At3g03270 | expressed protein; protein id: At3g03270.1         | 0 | 0.90 | 1.61 | 2.5 | 0.05 | 2 | Up progressive         |
| A001151_01 | At1g29700 | expressed protein; protein id: At1g29700.1         | 0 | 0.68 | 1.29 | 1.9 | 0.11 | 2 | Up progressive         |
| A001600_01 | At1g31940 | expressed protein; protein id: At1g31940.1         | 0 | 0.38 | 1.09 | 1.6 | 0.41 | 2 | Up progressive         |
| A002404_01 | At1g28280 | expressed protein; protein id: At1g28280.1         | 0 | 0.63 | 1.32 | 1.6 | 0.41 | 2 | Up progressive         |
| A005682_01 | At1g53030 | cytochrome C oxidase assembly protein, puta        | 0 | 0.56 | 1.31 | 2.1 | 0.05 | 2 | Up progressive         |
| A006638_01 | At2g31350 | glyoxalase II, putative (hydroxyacylglutathione    | 0 | 0.73 | 1.34 | 2.0 | 0.08 | 2 | Up progressive         |
| A016921_01 | At5g03560 | putative protein; protein id: At5g03560.1          | 0 | 0.90 | 1.62 | 2.8 | 0.05 | 2 | Up progressive         |
| A017319_01 | At5g35970 | DNA helicase-like; protein id: At5g35970.1         | 0 | 1.09 | 2.35 | 2.7 | 0.05 | 2 | Up progressive         |
| A017696_01 | At5g58787 | expressed protein; protein id: At5g58787.1         | 0 | 0.63 | 1.71 | 2.3 | 0.05 | 2 | Up progressive         |
| A019148_01 | At5g15860 | carboxylesterase-like protein; protein id: At5g    | 0 | 0.93 | 1.48 | 2.2 | 0.05 | 2 | Up progressive         |
| A019961_01 | At1g78200 | protein phosphatase 2C (PP2C); protein id: At      | 0 | 0.45 | 1.08 | 1.6 | 0.41 | 2 | Up progressive         |
| A020698_01 | At1g73500 | MAP kinase, putative; protein id: At1g73500.1      | 0 | 0.50 | 1.55 | 2.2 | 0.05 | 2 | Up progressive         |
| A025631_01 | At1g12640 | unknown protein; protein id: At1g12640.1           | 0 | 0.84 | 1.52 | 2.3 | 0.05 | 2 | Up progressive         |
| A002438_01 | At1g75410 | BEL1-like homeodomain 3 protein (BLH3); prc        | 0 | 1.35 | 2.07 | 2.8 | 0.05 | 2 | Up progressive         |
| A004544_01 | At1g78420 | expressed protein; protein id: At1g78420.1         | 0 | 0.43 | 1.00 | 1.8 | 0.23 | 2 | Up progressive         |
| A006983_01 | At2g47720 | hypothetical protein; protein id: At2g47720.1      | 0 | 0.75 | 1.59 | 2.5 | 0.05 | 2 | Up progressive         |
| A011464_01 | At3g10130 | unknown protein; protein id: At3g10130.1           | 0 | 0.70 | 1.48 | 3.2 | 0.05 | 2 | Up progressive         |
| A017547_01 | At5g55970 | putative protein; protein id: At5g55970.1          | 0 | 1.44 | 3.39 | 4.5 | 0.05 | 2 | Up progressive         |
| A019031_01 | At5g64240 | expressed protein; protein id: At5g64240.1         | 0 | 1.48 | 3.02 | 2.5 | 0.05 | 2 | Up progressive         |
| A019042_01 | At5g65910 | expressed protein; protein id: At5g65910.1         | 0 | 0.79 | 1.30 | 2.2 | 0.05 | 2 | Up progressive         |
| A019792_01 | At2g41140 | CPDK-related protein kinase; protein id: At2g      | 0 | 0.39 | 1.08 | 1.4 | 1.11 | 2 | Up progressive         |
| A024543_01 | At3g15840 | expressed protein; protein id: At3g15840.1         | 0 | 0.98 | 1.82 | 2.0 | 0.08 | 2 | Up progressive         |
| A026032_01 | At2g14470 | putative helicase; protein id: At2g14470.1         | 0 | 0.72 | 1.31 | 2.3 | 0.05 | 2 | Up progressive         |
| A009463_01 | At3g52530 | putative protein; protein id: At3g52530.1          | 0 | 0.84 | 1.61 | 1.1 | 5.44 | 2 | Up progressive         |
| A000319_01 | At1g26820 | ribonuclease, RNS3; protein id: At1g26820.1        | 0 | 2.11 | 0.23 | 1.9 | 0.11 | 3 | Up early and transient |
| A000851_01 | At1g52710 | unknown protein; protein id: At1g52710.1           | 0 | 1.77 | 0.25 | 1.9 | 0.11 | 3 | Up early and transient |

|            |           |                                                   |   |      |       |     |      |                          |
|------------|-----------|---------------------------------------------------|---|------|-------|-----|------|--------------------------|
| A001155_01 | At1g69490 | expressed protein; protein id: At1g69490.1        | 0 | 2.92 | 1.40  | 1.4 | 0.75 | 3 Up early and transient |
| A001212_01 | At1g56220 | expressed protein; protein id: At1g56220.1        | 0 | 1.73 | 0.83  | 1.4 | 0.75 | 3 Up early and transient |
| A001247_01 | At1g50420 | scarecrow-like 3; protein id: At1g50420.1         | 0 | 1.36 | 0.38  | 1.2 | 2.11 | 3 Up early and transient |
| A001250_01 | At1g03090 | putative 3-methylcrotonyl-CoA carboxylase; p      | 0 | 1.87 | 0.94  | 2.3 | 0.05 | 3 Up early and transient |
| A001418_01 | At1g75220 | integral membrane protein, putative; protein ic   | 0 | 1.30 | 0.31  | 1.6 | 0.41 | 3 Up early and transient |
| A001619_01 | At1g24160 | unknown protein; protein id: At1g24160.1          | 0 | 1.08 | -0.06 | 1.6 | 0.47 | 3 Up early and transient |
| A001631_01 | At1g35910 | trehalose-phosphatase, putative; protein id: At   | 0 | 2.01 | -0.19 | 1.6 | 0.47 | 3 Up early and transient |
| A002045_01 | At1g74670 | GAST1-like protein; protein id: At1g74670.1       | 0 | 1.67 | 0.49  | 1.2 | 2.11 | 3 Up early and transient |
| A002210_01 | At1g43670 | fructose 1,6-bisphosphatase, putative; protein    | 0 | 1.62 | 0.59  | 1.4 | 1.11 | 3 Up early and transient |
| A002258_01 | At1g14890 | expressed protein; protein id: At1g14890.1        | 0 | 1.19 | 0.17  | 1.9 | 0.17 | 3 Up early and transient |
| A002284_01 | At1g17520 | myb-related DNA-binding protein, putative; prc    | 0 | 1.07 | 0.42  | 1.4 | 1.11 | 3 Up early and transient |
| A002308_01 | xxxx      | b/t At1g48600.1 phosphoethanolamine N-met         | 0 | 1.05 | 0.20  | 1.4 | 0.75 | 3 Up early and transient |
| A002409_01 | At1g16950 | hypothetical protein; protein id: At1g16950.1     | 0 | 3.16 | -0.16 | 2.0 | 0.08 | 3 Up early and transient |
| A002491_01 | At1g11380 | expressed protein; protein id: At1g11380.1        | 0 | 1.26 | 0.29  | 2.0 | 0.08 | 3 Up early and transient |
| A002539_01 | At1g32170 | xyloglucan endotransglycosylase (XTR4), put       | 0 | 1.77 | 0.69  | 2.6 | 0.05 | 3 Up early and transient |
| A002643_01 | At1g12010 | putative amino-cyclopropane-carboxylic acid c     | 0 | 3.77 | 0.22  | 2.5 | 0.05 | 3 Up early and transient |
| A002651_01 | At1g70410 | carbonic anhydrase, putative; protein id: At1g    | 0 | 1.06 | -0.10 | 1.7 | 0.27 | 3 Up early and transient |
| A002696_01 | At1g55510 | branched-chain alpha-keto acid decarboxylas       | 0 | 1.54 | 0.54  | 1.4 | 1.11 | 3 Up early and transient |
| A003567_01 | At1g64660 | methionine/cystathionine gamma lyase, putati      | 0 | 1.47 | -0.57 | 2.1 | 0.08 | 3 Up early and transient |
| A003736_01 | At1g68230 | unknown protein; protein id: At1g68230.1          | 0 | 1.38 | -0.37 | 2.0 | 0.08 | 3 Up early and transient |
| A004431_01 | At1g08630 | expressed protein; protein id: At1g08630.1        | 0 | 1.76 | -0.16 | 2.3 | 0.05 | 3 Up early and transient |
| A004528_01 | At1g08570 | putative thioredoxin; protein id: At1g08570.1     | 0 | 1.35 | 0.44  | 1.1 | 5.44 | 3 Up early and transient |
| A004542_01 | At1g55810 | uracil phosphoribosyltransferase, putative; prc   | 0 | 1.49 | 0.75  | 1.2 | 1.42 | 3 Up early and transient |
| A004618_01 | At1g11260 | glucose transporter; protein id: At1g11260.1      | 0 | 2.55 | 1.28  | 1.6 | 0.41 | 3 Up early and transient |
| A004682_01 | At1g09970 | leucine-rich repeat transmembrane protein kir     | 0 | 1.32 | 0.42  | 1.5 | 0.60 | 3 Up early and transient |
| A005155_01 | At1g28660 | expressed protein; protein id: At1g28660.1        | 0 | 3.78 | 0.93  | 2.4 | 0.05 | 3 Up early and transient |
| A005246_01 | At1g02660 | expressed protein; protein id: At1g02660.1        | 0 | 2.17 | 0.88  | 2.2 | 0.05 | 3 Up early and transient |
| A005727_01 | At3g47340 | glutamine-dependent asparagine synthetase;        | 0 | 3.28 | -1.11 | 2.4 | 0.05 | 3 Up early and transient |
| A005845_01 | xxxx      | b/t At1g65840 and At1g65850 Chr1 C/240934         | 0 | 1.65 | 0.23  | 1.3 | 1.11 | 3 Up early and transient |
| A006087_01 | At2g20670 | expressed protein; protein id: At2g20670.1        | 0 | 3.25 | 1.14  | 1.5 | 0.60 | 3 Up early and transient |
| A006099_01 | At2g35680 | expressed protein; protein id: At2g35680.1        | 0 | 1.63 | 0.83  | 1.3 | 1.42 | 3 Up early and transient |
| A006104_01 | At2g05520 | putative glycine-rich protein; protein id: At2g05 | 0 | 1.96 | 1.09  | 1.5 | 0.47 | 3 Up early and transient |
| A006603_01 | At2g32440 | ent-kaurenoic acid oxidase (cytochrome P450       | 0 | 1.66 | 0.92  | 1.9 | 0.11 | 3 Up early and transient |
| A006708_01 | At2g38820 | expressed protein; protein id: At2g38820.1        | 0 | 1.13 | 0.35  | 1.2 | 2.11 | 3 Up early and transient |
| A006724_01 | At2g22680 | copia-like retroelement pol polyprotein; proteir  | 0 | 1.39 | 0.33  | 1.2 | 2.11 | 3 Up early and transient |
| A006935_01 | At2g26170 | thromboxane-A synthase(cytochrome p450 fa         | 0 | 1.27 | -0.17 | 1.5 | 0.60 | 3 Up early and transient |
| A007064_01 | At2g38870 | putative protease inhibitor; protein id: At2g388  | 0 | 1.29 | 0.03  | 1.6 | 0.41 | 3 Up early and transient |
| A007073_01 | At2g16660 | nodulin-like protein; protein id: At2g16660.1     | 0 | 1.38 | 0.67  | 1.6 | 0.41 | 3 Up early and transient |
| A007291_01 | At2g22470 | arabinogalactan-protein (AGP2); protein id: At    | 0 | 1.07 | -0.03 | 1.3 | 1.42 | 3 Up early and transient |
| A007306_01 | At2g05100 | light-harvesting chlorophyll a/b binding protein  | 0 | 1.13 | 0.43  | 1.6 | 0.47 | 3 Up early and transient |
| A007311_01 | At2g25900 | putative CCCH-type zinc finger protein; protei    | 0 | 1.25 | -0.31 | 1.3 | 1.42 | 3 Up early and transient |
| A007325_01 | At2g45820 | remorin; protein id: At2g45820.1                  | 0 | 1.64 | 0.76  | 1.7 | 0.27 | 3 Up early and transient |
| A007362_01 | At2g33830 | auxin-regulated protein; protein id: At2g33830    | 0 | 3.11 | 1.54  | 1.8 | 0.19 | 3 Up early and transient |
| A007656_01 | At2g44130 | expressed protein; protein id: At2g44130.1        | 0 | 2.89 | 0.69  | 2.2 | 0.05 | 3 Up early and transient |
| A007768_01 | At2g42620 | F-box protein ORE9, AtFBL7; protein id: At2g      | 0 | 1.25 | 0.32  | 1.3 | 1.42 | 3 Up early and transient |

|            |           |                                                                              |   |      |       |     |      |                          |
|------------|-----------|------------------------------------------------------------------------------|---|------|-------|-----|------|--------------------------|
| A007795_01 | At2g47270 | expressed protein; protein id: At2g47270.1                                   | 0 | 1.76 | 0.54  | 1.9 | 0.17 | 3 Up early and transient |
| A007797_01 | At2g32150 | putative hydrolase; protein id: At2g32150.1                                  | 0 | 3.64 | 0.10  | 2.3 | 0.05 | 3 Up early and transient |
| A007993_01 | At2g31810 | putative acetolactate synthase; protein id: At2g31810.1                      | 0 | 1.59 | 0.70  | 1.4 | 1.11 | 3 Up early and transient |
| A008007_01 | At2g14170 | putative methylmalonate semi-aldehyde dehydrogenase; protein id: At2g14170.1 | 0 | 1.31 | 0.27  | 1.2 | 2.11 | 3 Up early and transient |
| A008415_01 | At2g18550 | homeodomain protein; protein id: At2g18550.1                                 | 0 | 3.08 | 0.91  | 2.0 | 0.08 | 3 Up early and transient |
| A008562_01 | At2g02990 | ribonuclease, RNS1; protein id: At2g02990.1                                  | 0 | 3.56 | 0.51  | 2.2 | 0.05 | 3 Up early and transient |
| A008578_01 | At2g38400 | putative beta-alanine-pyruvate aminotransferase; protein id: At2g38400.1     | 0 | 1.90 | -0.11 | 1.7 | 0.23 | 3 Up early and transient |
| A008873_01 | At3g04070 | NAM-like protein (no apical meristem); protein id: At3g04070.1               | 0 | 3.51 | 1.88  | 2.0 | 0.08 | 3 Up early and transient |
| A009088_01 | At3g04910 | putative mitogen activated protein kinase kinase; protein id: At3g04910.1    | 0 | 1.49 | 0.59  | 1.4 | 0.75 | 3 Up early and transient |
| A009107_01 | At3g57520 | glycosyl hydrolase family 36; protein id: At3g57520.1                        | 0 | 1.62 | -0.18 | 1.4 | 0.75 | 3 Up early and transient |
| A009139_01 | At3g51600 | non-specific lipid transfer protein; protein id: At3g51600.1                 | 0 | 1.30 | -0.08 | 1.7 | 0.36 | 3 Up early and transient |
| A009165_01 | At3g26100 | expressed protein; protein id: At3g26100.1                                   | 0 | 1.51 | 0.45  | 1.1 | 5.44 | 3 Up early and transient |
| A009328_01 | At3g56880 | putative protein; protein id: At3g56880.1                                    | 0 | 1.66 | 0.70  | 1.4 | 1.11 | 3 Up early and transient |
| A009530_01 | At3g21550 | expressed protein; protein id: At3g21550.1                                   | 0 | 1.35 | 0.06  | 1.7 | 0.27 | 3 Up early and transient |
| A009890_01 | At3g30775 | hypothetical protein; protein id: At3g30775.1                                | 0 | 1.32 | -0.38 | 1.8 | 0.17 | 3 Up early and transient |
| A010065_01 | At3g14610 | cytochrome P450, putative; protein id: At3g14610.1                           | 0 | 1.26 | -0.17 | 1.8 | 0.19 | 3 Up early and transient |
| A010579_01 | At3g54880 | putative protein; protein id: At3g54880.1                                    | 0 | 1.26 | 0.34  | 1.6 | 0.41 | 3 Up early and transient |
| A010863_01 | At3g21420 | expressed protein; protein id: At3g21420.1                                   | 0 | 1.33 | 0.37  | 1.2 | 2.11 | 3 Up early and transient |
| A011193_01 | At3g22060 | receptor kinase common family, putative; protein id: At3g22060.1             | 0 | 2.22 | 0.65  | 2.2 | 0.05 | 3 Up early and transient |
| A011505_01 | At3g52840 | glycosyl hydrolase family 35 (beta-galactosidase); protein id: At3g52840.1   | 0 | 1.16 | 0.08  | 2.1 | 0.08 | 3 Up early and transient |
| A011810_01 | At3g04720 | hevein-like protein precursor (PR-4); protein id: At3g04720.1                | 0 | 2.52 | 1.26  | 2.0 | 0.08 | 3 Up early and transient |
| A012155_01 | At3g03990 | expressed protein; protein id: At3g03990.1                                   | 0 | 1.15 | 0.56  | 1.1 | 5.44 | 3 Up early and transient |
| A012396_01 | At3g57960 | hypothetical protein; protein id: At3g57960.1                                | 0 | 1.15 | 0.22  | 1.1 | 5.44 | 3 Up early and transient |
| A012880_01 | At4g11650 | osmotin precursor; protein id: At4g11650.1                                   | 0 | 2.24 | 0.62  | 1.4 | 1.11 | 3 Up early and transient |
| A013034_01 | At4g10910 | expressed protein; protein id: At4g10910.1                                   | 0 | 2.43 | 0.54  | 2.4 | 0.05 | 3 Up early and transient |
| A013417_01 | At4g32480 | putative protein; protein id: At4g32480.1                                    | 0 | 1.80 | -0.83 | 1.7 | 0.36 | 3 Up early and transient |
| A013429_01 | At4g01330 | putative protein kinase; protein id: At4g01330.1                             | 0 | 1.51 | -0.06 | 1.6 | 0.36 | 3 Up early and transient |
| A013537_01 | At4g14270 | expressed protein; protein id: At4g14270.1                                   | 0 | 1.78 | 0.75  | 1.9 | 0.08 | 3 Up early and transient |
| A013659_01 | At4g10610 | RNA-binding protein RBP37; protein id: At4g10610.1                           | 0 | 1.08 | -0.11 | 1.4 | 0.75 | 3 Up early and transient |
| A013676_01 | At4g35690 | putative protein; protein id: At4g35690.1                                    | 0 | 3.33 | 0.55  | 2.4 | 0.05 | 3 Up early and transient |
| A013995_01 | At4g24230 | putative protein; protein id: At4g24230.1                                    | 0 | 1.97 | 0.31  | 2.2 | 0.05 | 3 Up early and transient |
| A014115_01 | At4g28040 | Medicago nodulin N21-like protein; protein id: At4g28040.1                   | 0 | 2.70 | 1.14  | 1.7 | 0.23 | 3 Up early and transient |
| A014186_01 | At4g36730 | G-box-binding factor 1; protein id: At4g36730.1                              | 0 | 1.45 | 0.17  | 1.4 | 0.75 | 3 Up early and transient |
| A014526_01 | At4g14930 | expressed protein; protein id: At4g14930.1                                   | 0 | 2.68 | 0.34  | 1.8 | 0.23 | 3 Up early and transient |
| A014688_01 | At4g37610 | putative protein; protein id: At4g37610.1                                    | 0 | 2.61 | 0.62  | 1.6 | 0.41 | 3 Up early and transient |
| A014801_01 | At4g25620 | unknown protein; protein id: At4g25620.1                                     | 0 | 1.05 | -0.19 | 1.4 | 1.11 | 3 Up early and transient |
| A014802_01 | At4g24660 | putative protein; protein id: At4g24660.1                                    | 0 | 1.01 | 0.39  | 1.5 | 0.60 | 3 Up early and transient |
| A014867_01 | At4g36740 | homeodomain protein; protein id: At4g36740.1                                 | 0 | 2.89 | -0.19 | 2.0 | 0.08 | 3 Up early and transient |
| A015062_01 | At4g38470 | protein kinase like protein; protein id: At4g38470.1                         | 0 | 1.80 | 0.56  | 1.4 | 0.75 | 3 Up early and transient |
| A015331_01 | At4g24040 | glycosyl hydrolase family 37 (trehalase); protein id: At4g24040.1            | 0 | 1.42 | -0.04 | 2.0 | 0.08 | 3 Up early and transient |
| A015465_01 | At4g37260 | myb DNA-binding protein (AtMYB73); protein id: At4g37260.1                   | 0 | 1.13 | -0.53 | 2.5 | 0.05 | 3 Up early and transient |
| A016034_01 | At5g50260 | AtCEP1; cysteine proteinase; protein id: At5g50260.1                         | 0 | 3.55 | 1.36  | 1.9 | 0.11 | 3 Up early and transient |
| A016209_01 | At5g64260 | phi-1-like protein; protein id: At5g64260.1                                  | 0 | 1.21 | 0.12  | 1.8 | 0.19 | 3 Up early and transient |
| A016319_01 | At5g44610 | expressed protein                                                            | 0 | 2.41 | 1.22  | 2.3 | 0.05 | 3 Up early and transient |
| A016324_01 | At5g39610 | NAM / CUC2 - like protein; protein id: At5g39610.1                           | 0 | 2.57 | 1.43  | 1.7 | 0.27 | 3 Up early and transient |

|            |           |                                                                          |   |      |       |     |      |                          |
|------------|-----------|--------------------------------------------------------------------------|---|------|-------|-----|------|--------------------------|
| A016359_01 | At5g09440 | putative protein; protein id: At5g09440.1                                | 0 | 2.02 | 0.95  | 1.7 | 0.36 | 3 Up early and transient |
| A016924_01 | At5g42200 | putative protein; protein id: At5g42200.1                                | 0 | 1.67 | 0.55  | 1.5 | 0.47 | 3 Up early and transient |
| A017311_01 | At5g13330 | putative protein; protein id: At5g13330.1                                | 0 | 1.54 | 0.65  | 1.6 | 0.36 | 3 Up early and transient |
| A017692_01 | At5g64930 | CPR5 protein, putative; protein id: At5g64930.                           | 0 | 1.08 | 0.58  | 1.6 | 0.41 | 3 Up early and transient |
| A018019_01 | At5g14740 | carbonic anhydrase 2; protein id: At5g14740.1                            | 0 | 2.55 | -0.06 | 1.8 | 0.19 | 3 Up early and transient |
| A018041_01 | At5g19120 | conglutin gamma - like protein; protein id: At5g19120.1                  | 0 | 1.40 | -0.31 | 1.2 | 2.11 | 3 Up early and transient |
| A018240_01 | At5g12010 | putative protein; protein id: At5g12010.1                                | 0 | 1.48 | 0.72  | 1.2 | 2.11 | 3 Up early and transient |
| A018308_01 | At5g16360 | putative protein; protein id: At5g16360.1                                | 0 | 1.42 | 0.34  | 1.2 | 5.44 | 3 Up early and transient |
| A018673_01 | At5g01920 | putative protein; protein id: At5g01920.1                                | 0 | 2.36 | 0.65  | 2.5 | 0.05 | 3 Up early and transient |
| A018934_01 | At5g58410 | unknown protein; protein id: At5g58410.1                                 | 0 | 1.95 | 0.46  | 2.6 | 0.05 | 3 Up early and transient |
| A018974_01 | At5g23340 | putative protein; protein id: At5g23340.1                                | 0 | 1.13 | 0.29  | 1.3 | 1.42 | 3 Up early and transient |
| A018991_01 | At5g21940 | unknown protein; protein id: At5g21940.1                                 | 0 | 1.79 | 0.79  | 1.3 | 1.42 | 3 Up early and transient |
| A019281_01 | At5g14420 | putative protein; protein id: At5g14420.1                                | 0 | 1.17 | 0.45  | 1.4 | 1.11 | 3 Up early and transient |
| A019587_01 | At4g09030 | arabinogalactan-protein (AGP10); protein id: At4g09030.1                 | 0 | 1.24 | -0.33 | 1.5 | 0.47 | 3 Up early and transient |
| A019608_01 | At3g45970 | putative protein; protein id: At3g45970.1                                | 0 | 1.60 | -0.65 | 2.5 | 0.05 | 3 Up early and transient |
| A019611_01 | At5g02230 | putative protein; protein id: At5g02230.1                                | 0 | 1.88 | 0.26  | 1.5 | 0.60 | 3 Up early and transient |
| A019725_01 | At5g54510 | auxin-responsive-like protein; protein id: At5g54510.1                   | 0 | 1.08 | 0.06  | 1.8 | 0.17 | 3 Up early and transient |
| A019895_01 | At1g44800 | nodulin protein, putative; protein id: At1g44800.1                       | 0 | 1.89 | 0.86  | 1.2 | 2.11 | 3 Up early and transient |
| A019941_01 | At1g60010 | expressed protein; protein id: At1g60010.1                               | 0 | 1.04 | 0.24  | 1.5 | 0.60 | 3 Up early and transient |
| A020070_01 | At1g22740 | ras-related GTP-binding protein (Rab7); protein id: At1g22740.1          | 0 | 1.54 | 0.07  | 1.5 | 0.47 | 3 Up early and transient |
| A020076_01 | At3g13450 | branched chain alpha-keto acid dehydrogenase; protein id: At3g13450.1    | 0 | 1.47 | 0.43  | 1.6 | 0.36 | 3 Up early and transient |
| A020242_01 | At4g36850 | putative protein; protein id: At4g36850.1                                | 0 | 2.02 | -0.63 | 1.3 | 1.42 | 3 Up early and transient |
| A020343_01 | At3g21870 | PREG-like protein, putative; protein id: At3g21870.1                     | 0 | 1.43 | 0.29  | 2.2 | 0.05 | 3 Up early and transient |
| A020400_01 | At3g15630 | expressed protein; protein id: At3g15630.1                               | 0 | 1.97 | 0.48  | 1.9 | 0.11 | 3 Up early and transient |
| A020560_01 | At3g47340 | glutamine-dependent asparagine synthetase; protein id: At3g47340.1       | 0 | 3.09 | -0.57 | 2.4 | 0.05 | 3 Up early and transient |
| A020565_01 | At3g10980 | unknown protein; protein id: At3g10980.1                                 | 0 | 1.04 | 0.23  | 1.2 | 2.11 | 3 Up early and transient |
| A020656_01 | At3g29810 | phytochelatin synthetase-like protein; protein id: At3g29810.1           | 0 | 1.20 | 0.20  | 1.4 | 1.11 | 3 Up early and transient |
| A020777_01 | At2g44500 | similar to axi 1 protein from Nicotiana tabacum; protein id: At2g44500.1 | 0 | 2.27 | 1.00  | 2.7 | 0.05 | 3 Up early and transient |
| A020868_01 | At3g10020 | expressed protein; protein id: At3g10020.1                               | 0 | 1.51 | 0.31  | 1.6 | 0.41 | 3 Up early and transient |
| A021133_01 | At1g11190 | bifunctional nuclease bfn1; protein id: At1g11190.1                      | 0 | 2.90 | 1.06  | 2.2 | 0.05 | 3 Up early and transient |
| A021760_01 | At1g70670 | Ca2+-binding EF-hand common family protein; protein id: At1g70670.1      | 0 | 1.58 | 0.83  | 1.4 | 1.11 | 3 Up early and transient |
| A021882_01 | At5g14180 | putative protein; protein id: At5g14180.1                                | 0 | 2.17 | 0.60  | 1.5 | 0.60 | 3 Up early and transient |
| A021937_01 | At1g14870 | unknown protein; protein id: At1g14870.1                                 | 0 | 1.74 | 0.04  | 1.8 | 0.19 | 3 Up early and transient |
| A021968_01 | At3g53990 | expressed protein; protein id: At3g53990.1                               | 0 | 1.19 | 0.48  | 1.8 | 0.19 | 3 Up early and transient |
| A021978_01 | At1g08630 | expressed protein; protein id: At1g08630.1                               | 0 | 1.76 | -0.40 | 2.3 | 0.05 | 3 Up early and transient |
| A022000_01 | At5g56540 | arabinogalactan-protein (AGP14); protein id: At5g56540.1                 | 0 | 2.33 | 0.12  | 1.8 | 0.23 | 3 Up early and transient |
| A022381_01 | At4g27260 | GH3 like protein; protein id: At4g27260.1                                | 0 | 2.11 | 0.77  | 2.3 | 0.05 | 3 Up early and transient |
| A023623_01 | At2g31560 | unknown protein; protein id: At2g31560.1                                 | 0 | 1.36 | 0.69  | 1.2 | 2.11 | 3 Up early and transient |
| A023904_01 | At1g49130 | CONSTANS B-box zinc finger family protein; protein id: At1g49130.1       | 0 | 1.03 | -0.18 | 1.4 | 1.11 | 3 Up early and transient |
| A024259_01 | At3g48340 | AtCEP2; cysteine proteinase; protein id: At3g48340.1                     | 0 | 3.46 | 0.67  | 2.4 | 0.05 | 3 Up early and transient |
| A024360_01 | At1g15380 | expressed protein; protein id: At1g15380.1                               | 0 | 2.02 | 0.57  | 1.4 | 0.75 | 3 Up early and transient |
| A024501_01 | At4g32060 | putative protein; protein id: At4g32060.1                                | 0 | 1.37 | 0.20  | 1.1 | 5.44 | 3 Up early and transient |
| A024513_01 | At4g37550 | formamidase - like protein; protein id: At4g37550.1                      | 0 | 1.05 | 0.26  | 1.7 | 0.23 | 3 Up early and transient |
| A024522_01 | At3g09390 | metallothionein-like protein; protein id: At3g09390.1                    | 0 | 1.08 | 0.31  | 1.2 | 5.44 | 3 Up early and transient |
| A024527_01 | At1g75750 | expressed protein; protein id: At1g75750.1                               | 0 | 2.74 | 0.38  | 2.4 | 0.05 | 3 Up early and transient |

|            |           |                                                    |   |       |       |     |      |                          |
|------------|-----------|----------------------------------------------------|---|-------|-------|-----|------|--------------------------|
| A024538_01 | At3g06850 | branched chain alpha-keto acid dehydrogenas        | 0 | 1.41  | 0.39  | 1.7 | 0.27 | 3 Up early and transient |
| A024588_01 | At4g37300 | putative protein; protein id: At4g37300.1          | 0 | 1.33  | -0.11 | 1.5 | 0.60 | 3 Up early and transient |
| A025101_01 | At5g16340 | AMP-binding protein; protein id: At5g16340.1       | 0 | 1.03  | 0.41  | 1.4 | 0.75 | 3 Up early and transient |
| A025769_01 | At4g34030 | putative protein; protein id: At4g34030.1          | 0 | 1.83  | 0.82  | 1.2 | 2.11 | 3 Up early and transient |
| A025847_01 | At5g07440 | glutamate dehydrogenase 2; protein id: At5g0       | 0 | 1.58  | 0.05  | 1.4 | 0.75 | 3 Up early and transient |
| A026002_01 | At5g07440 | glutamate dehydrogenase 2; protein id: At5g0       | 0 | 1.63  | 0.01  | 1.6 | 0.36 | 3 Up early and transient |
| A006661_01 | At2g16890 | putative glucosyltransferase; protein id: At2g1    | 0 | 1.00  | 0.46  | 1.3 | 1.11 | 3 Up early and transient |
| A007065_01 | At2g38910 | putative calcium-dependent protein kinase; pr      | 0 | 1.45  | 0.28  | 1.5 | 0.60 | 3 Up early and transient |
| A007160_01 | At2g35770 | putative serine carboxypeptidase II; protein id:   | 0 | 1.27  | 0.11  | 1.4 | 0.75 | 3 Up early and transient |
| A007579_01 | At2g28550 | AP2 domain protein RAP2.7; protein id: At2g2       | 0 | 1.05  | 0.53  | 1.1 | 5.44 | 3 Up early and transient |
| A000022_01 | At1g12140 | hypothetical protein; protein id: At1g12140.1      | 0 | 0.05  | 1.16  | 2.1 | 0.08 | 4 Up late                |
| A000187_01 | At1g10080 | hypothetical protein; protein id: At1g10080.1      | 0 | -0.06 | 1.78  | 1.2 | 2.11 | 4 Up late                |
| A000297_01 | At1g69720 | putative heme oxygenase; protein id: At1g697       | 0 | 0.24  | 1.10  | 1.3 | 1.42 | 4 Up late                |
| A000325_01 | At1g20070 | hypothetical protein; protein id: At1g20070.1      | 0 | 0.41  | 1.47  | 2.5 | 0.05 | 4 Up late                |
| A000525_01 | At1g03050 | putative protein destination factor; protein id: / | 0 | -0.09 | 1.03  | 1.4 | 0.75 | 4 Up late                |
| A000592_01 | At1g51340 | expressed protein; protein id: At1g51340.1         | 0 | 0.23  | 1.82  | 2.5 | 0.05 | 4 Up late                |
| A000755_01 | At1g24520 | putative agp1; protein id: At1g24520.1             | 0 | 0.34  | 1.28  | 1.6 | 0.36 | 4 Up late                |
| A000880_01 | At1g25480 | hypothetical protein; protein id: At1g25480.1      | 0 | 0.46  | 1.80  | 1.1 | 5.44 | 4 Up late                |
| A001115_01 | At1g32100 | pinorexinol-lariciresinol reductase, putative; pr  | 0 | 0.05  | 1.93  | 2.0 | 0.08 | 4 Up late                |
| A001216_01 | At1g74020 | strictosidine synthase family; protein id: At1g7   | 0 | 0.83  | 3.03  | 3.6 | 0.05 | 4 Up late                |
| A001219_01 | At1g32160 | expressed protein; protein id: At1g32160.1         | 0 | 0.14  | 1.09  | 1.7 | 0.23 | 4 Up late                |
| A001261_01 | At1g36370 | putative hydroxymethyltransferase; protein id:     | 0 | 0.02  | 1.41  | 1.2 | 5.44 | 4 Up late                |
| A001477_01 | At1g14380 | expressed protein; protein id: At1g14380.1         | 0 | -0.12 | 1.01  | 1.5 | 0.60 | 4 Up late                |
| A001481_01 | At1g19740 | unknown protein; protein id: At1g19740.1           | 0 | 0.18  | 1.03  | 2.2 | 0.05 | 4 Up late                |
| A001612_01 | At1g25530 | lysine and histidine specific transporter, putati  | 0 | -0.86 | 1.51  | 3.2 | 0.05 | 4 Up late                |
| A001770_01 | At1g08810 | myb family transcription factor; protein id: At1g  | 0 | 0.09  | 1.18  | 1.6 | 0.47 | 4 Up late                |
| A001789_01 | At1g77320 | hypothetical protein; protein id: At1g77320.1      | 0 | -0.36 | 1.30  | 1.8 | 0.19 | 4 Up late                |
| A001790_01 | At1g64970 | gamma-tocopherol methyltransferase; protein        | 0 | -0.13 | 1.37  | 1.7 | 0.27 | 4 Up late                |
| A002013_01 | At1g10470 | putative response regulator 3; protein id: At1g    | 0 | 0.22  | 1.35  | 2.7 | 0.05 | 4 Up late                |
| A002035_01 | At1g49970 | ATP-dependent Clp protease proteolytic subu        | 0 | 0.11  | 1.10  | 1.9 | 0.08 | 4 Up late                |
| A002054_01 | At1g22750 | expressed protein; protein id: At1g22750.1         | 0 | 0.37  | 1.34  | 1.9 | 0.08 | 4 Up late                |
| A002184_01 | At1g18880 | peptide transporter, putative; protein id: At1g1   | 0 | 0.29  | 2.60  | 1.4 | 0.75 | 4 Up late                |
| A002224_01 | At1g78460 | hypothetical protein; protein id: At1g78460.1      | 0 | 0.25  | 1.39  | 1.6 | 0.41 | 4 Up late                |
| A002235_01 | At1g62990 | homeodomain-containing protein HD1, putativ        | 0 | -0.01 | 1.69  | 1.8 | 0.23 | 4 Up late                |
| A002267_01 | At1g55910 | expressed protein; protein id: At1g55910.1         | 0 | -0.34 | 1.11  | 1.7 | 0.23 | 4 Up late                |
| A002349_01 | At1g22050 | expressed protein; protein id: At1g22050.1         | 0 | 0.12  | 1.71  | 2.6 | 0.05 | 4 Up late                |
| A002376_01 | At1g17780 | unknown protein; protein id: At1g17780.1           | 0 | 0.45  | 1.67  | 1.3 | 1.42 | 4 Up late                |
| A002408_01 | At1g16960 | hypothetical protein; protein id: At1g16960.1      | 0 | 0.48  | 1.98  | 3.0 | 0.05 | 4 Up late                |
| A002580_01 | At1g22480 | uclacyanin II, putative; protein id: At1g22480.1   | 0 | -0.30 | 2.30  | 2.9 | 0.05 | 4 Up late                |
| A002793_01 | At1g54070 | unknown protein; protein id: At1g54070.1           | 0 | 0.28  | 1.36  | 1.6 | 0.36 | 4 Up late                |
| A002922_01 | At1g80830 | metal ion transporter; protein id: At1g80830.1     | 0 | 0.36  | 1.84  | 2.5 | 0.05 | 4 Up late                |
| A003018_01 | At1g70810 | expressed protein; protein id: At1g70810.1         | 0 | 0.82  | 3.24  | 2.0 | 0.08 | 4 Up late                |
| A003141_01 | At1g21065 | expressed protein; protein id: At1g21065.1         | 0 | 0.53  | 1.91  | 3.0 | 0.05 | 4 Up late                |
| A003242_01 | At1g80300 | adenine nucleotide translocase; protein id: At1    | 0 | -0.29 | 1.27  | 2.0 | 0.08 | 4 Up late                |
| A003497_01 | At1g22140 | expressed protein; protein id: At1g22140.1         | 0 | 0.25  | 1.10  | 2.2 | 0.05 | 4 Up late                |



|            |           |                                                                                   |   |       |      |     |      |           |
|------------|-----------|-----------------------------------------------------------------------------------|---|-------|------|-----|------|-----------|
| A003503_01 | At1g22070 | bZIP transcription factor, TGA3; protein id: At1g22070.1                          | 0 | 0.14  | 1.12 | 1.9 | 0.11 | 4 Up late |
| A003528_01 | At1g76520 | expressed protein; protein id: At1g76520.1                                        | 0 | 0.34  | 1.22 | 2.2 | 0.05 | 4 Up late |
| A003576_01 | At1g04770 | hypothetical protein; protein id: At1g04770.1                                     | 0 | -0.48 | 1.71 | 1.9 | 0.17 | 4 Up late |
| A003691_01 | At1g10900 | phosphatidylinositol-4-phosphate 5-kinase isoform 1; protein id: At1g10900.1      | 0 | -0.31 | 1.43 | 2.4 | 0.05 | 4 Up late |
| A003720_01 | At1g72430 | expressed protein; protein id: At1g72430.1                                        | 0 | 0.44  | 1.56 | 2.7 | 0.05 | 4 Up late |
| A003750_01 | At1g47270 | F-box containing tubby family protein; protein id: At1g47270.1                    | 0 | -0.10 | 1.02 | 1.7 | 0.27 | 4 Up late |
| A003804_01 | At1g15960 | metal ion transporter, putative; protein id: At1g15960.1                          | 0 | 0.21  | 1.33 | 1.2 | 2.11 | 4 Up late |
| A003959_01 | At1g13970 | hypothetical protein; protein id: At1g13970.1                                     | 0 | 0.33  | 1.40 | 1.9 | 0.17 | 4 Up late |
| A003997_01 | At1g80170 | polygalacturonase, putative; protein id: At1g80170.1                              | 0 | -0.69 | 1.12 | 2.4 | 0.05 | 4 Up late |
| A004038_01 | At1g35190 | hyoscyamine 6-dioxygenase hydroxylase, putative; protein id: At1g35190.1          | 0 | 0.07  | 1.14 | 1.4 | 1.11 | 4 Up late |
| A004272_01 | At1g73630 | putative calmodulin; protein id: At1g73630.1                                      | 0 | 0.35  | 1.80 | 2.5 | 0.05 | 4 Up late |
| A004285_01 | At1g63270 | ABC transporter family protein; protein id: At1g63270.1                           | 0 | 0.36  | 2.58 | 3.2 | 0.05 | 4 Up late |
| A004314_01 | At1g35970 | hypothetical protein; protein id: At1g35970.1                                     | 0 | 0.71  | 4.99 | 2.8 | 0.05 | 4 Up late |
| A004404_01 | At1g66670 | ATP-dependent Clp protease proteolytic subunit; protein id: At1g66670.1           | 0 | -0.70 | 1.64 | 5.3 | 0.05 | 4 Up late |
| A004442_01 | At1g52080 | expressed protein; protein id: At1g52080.1                                        | 0 | 0.11  | 2.13 | 1.6 | 0.41 | 4 Up late |
| A004769_01 | At1g66200 | glutamine synthetase, putative; protein id: At1g66200.1                           | 0 | -0.03 | 1.28 | 1.7 | 0.27 | 4 Up late |
| A004882_01 | At1g17540 | receptor-like serine threonine kinase, putative; protein id: At1g17540.1          | 0 | -0.14 | 1.33 | 1.1 | 5.44 | 4 Up late |
| A005356_01 | At4g16840 | expressed protein; protein id: At4g16840.1                                        | 0 | 0.16  | 1.56 | 2.6 | 0.05 | 4 Up late |
| A005377_01 | At1g68945 | expressed protein; protein id: At1g68945.1                                        | 0 | -0.27 | 1.92 | 2.3 | 0.05 | 4 Up late |
| A005410_01 | At5g26696 | nectarin - like protein; protein id: At5g26696.1                                  | 0 | 0.16  | 1.40 | 2.1 | 0.08 | 4 Up late |
| A005687_01 | At5g58570 | expressed protein; protein id: At5g58570.1                                        | 0 | 0.72  | 2.90 | 3.6 | 0.05 | 4 Up late |
| A005787_01 | At5g25900 | cytochrome P450 GA3; protein id: At5g25900.1                                      | 0 | 0.27  | 1.09 | 1.9 | 0.17 | 4 Up late |
| A006039_01 | At2g03710 | MADS-box protein (AGL3); protein id: At2g03710.1                                  | 0 | 0.35  | 1.55 | 1.4 | 0.75 | 4 Up late |
| A006102_01 | At2g46450 | cyclic nucleotide-regulated ion channel, putative; protein id: At2g46450.1        | 0 | -0.21 | 1.23 | 1.8 | 0.19 | 4 Up late |
| A006313_01 | At2g19000 | expressed protein; protein id: At2g19000.1                                        | 0 | 0.22  | 1.28 | 1.6 | 0.47 | 4 Up late |
| A006329_01 | At2g40850 | hypothetical protein; protein id: At2g40850.1                                     | 0 | 0.22  | 1.57 | 1.9 | 0.17 | 4 Up late |
| A006568_01 | At2g27180 | expressed protein; protein id: At2g27180.1                                        | 0 | 0.27  | 1.20 | 1.8 | 0.19 | 4 Up late |
| A006595_01 | At2g13350 | hypothetical protein; protein id: At2g13350.1                                     | 0 | 0.06  | 1.03 | 1.5 | 0.47 | 4 Up late |
| A006597_01 | At2g29380 | protein phosphatase 2C (PP2C), putative; protein id: At2g29380.1                  | 0 | 0.33  | 1.49 | 1.3 | 1.42 | 4 Up late |
| A006622_01 | At2g36710 | pectinesterase family; protein id: At2g36710.1                                    | 0 | 0.48  | 3.39 | 5.6 | 0.05 | 4 Up late |
| A006736_01 | At2g46690 | putative auxin-regulated protein; protein id: At2g46690.1                         | 0 | 0.71  | 3.22 | 2.3 | 0.05 | 4 Up late |
| A006802_01 | At2g37090 | unknown protein; protein id: At2g37090.1                                          | 0 | -0.29 | 1.39 | 1.3 | 1.42 | 4 Up late |
| A007260_01 | At2g23600 | putative acetone-cyanohydrin lyase; protein id: At2g23600.1                       | 0 | -0.05 | 1.46 | 2.7 | 0.05 | 4 Up late |
| A007302_01 | At2g31750 | putative glucosyltransferase; protein id: At2g31750.1                             | 0 | -0.07 | 1.86 | 2.1 | 0.08 | 4 Up late |
| A007334_01 | At2g14750 | putative adenosine phosphosulfate kinase; protein id: At2g14750.1                 | 0 | 0.10  | 1.28 | 1.5 | 0.75 | 4 Up late |
| A007385_01 | At2g40460 | putative PTR2 family peptide transporter; protein id: At2g40460.1                 | 0 | -0.09 | 1.21 | 1.9 | 0.11 | 4 Up late |
| A007618_01 | At2g38080 | laccase (diphenol oxidase), putative; protein id: At2g38080.1                     | 0 | -0.28 | 2.47 | 3.5 | 0.05 | 4 Up late |
| A007812_01 | At2g23840 | unknown protein; protein id: At2g23840.1                                          | 0 | 0.60  | 2.44 | 3.0 | 0.05 | 4 Up late |
| A007829_01 | At2g46360 | hypothetical protein; protein id: At2g46360.1                                     | 0 | -0.03 | 1.11 | 1.7 | 0.27 | 4 Up late |
| A007974_01 | At2g15050 | putative lipid transfer protein; protein id: At2g15050.1                          | 0 | 0.24  | 1.51 | 1.7 | 0.27 | 4 Up late |
| A008043_01 | At2g36020 | expressed protein; protein id: At2g36020.1                                        | 0 | -0.14 | 1.09 | 1.6 | 0.47 | 4 Up late |
| A008191_01 | At2g22860 | unknown protein; protein id: At2g22860.1                                          | 0 | 0.03  | 1.05 | 1.3 | 1.42 | 4 Up late |
| A008270_01 | At2g46210 | putative fatty acid desaturase/cytochrome b5 like domain; protein id: At2g46210.1 | 0 | -0.06 | 1.13 | 1.7 | 0.23 | 4 Up late |
| A008272_01 | At2g40990 | unknown protein; protein id: At2g40990.1                                          | 0 | 0.00  | 1.27 | 1.5 | 0.47 | 4 Up late |
| A008472_01 | At2g37040 | phenylalanine ammonia lyase (PAL1); protein id: At2g37040.1                       | 0 | -0.89 | 1.01 | 2.4 | 0.05 | 4 Up late |

|            |               |                                                                                    |   |       |      |     |      |           |
|------------|---------------|------------------------------------------------------------------------------------|---|-------|------|-----|------|-----------|
| A008572_01 | At2g42280     | bHLH protein; protein id: At2g42280.1                                              | 0 | 0.43  | 1.66 | 1.5 | 0.47 | 4 Up late |
| A008867_01 | At2g37770     | aldo/keto reductase family; protein id: At2g37770.1                                | 0 | -0.01 | 1.56 | 1.4 | 0.75 | 4 Up late |
| A008924_01 | At3g62230     | putative protein; protein id: At3g62230.1                                          | 0 | 0.21  | 1.39 | 1.3 | 1.42 | 4 Up late |
| A008950_01 | At3g11900     | putative amino acid transporter protein; protein id: At3g11900.1                   | 0 | 0.28  | 1.07 | 1.9 | 0.17 | 4 Up late |
| A009044_01 | At3g62710     | glycosyl hydrolase family 3; protein id: At3g62710.1                               | 0 | -0.47 | 1.01 | 1.8 | 0.19 | 4 Up late |
| A009233_01 | At3g43120     | indole-3-acetic acid induced protein, related; protein id: At3g43120.1             | 0 | -0.20 | 1.04 | 1.7 | 0.27 | 4 Up late |
| A009409_01 | At3g15050     | hypothetical protein; protein id: At3g15050.1                                      | 0 | 0.09  | 1.44 | 1.8 | 0.19 | 4 Up late |
| A009501_01 | At3g48740     | MTN3-like protein; protein id: At3g48740.1                                         | 0 | 1.03  | 3.78 | 5.2 | 0.05 | 4 Up late |
| A009515_01 | At3g05400     | sugar transporter, putative; protein id: At3g05400.1                               | 0 | -0.08 | 3.22 | 3.2 | 0.05 | 4 Up late |
| A009845_01 | not annotated | Chr3 C/9929563-9929632                                                             | 0 | -0.43 | 1.16 | 2.2 | 0.05 | 4 Up late |
| A009926_01 | At3g05610     | putative pectinesterase; protein id: At3g05610.1                                   | 0 | 0.03  | 1.27 | 1.2 | 5.44 | 4 Up late |
| A010414_01 | At3g01240     | hypothetical protein; protein id: At3g01240.1                                      | 0 | 0.33  | 1.29 | 1.5 | 0.60 | 4 Up late |
| A010495_01 | At3g04700     | hypothetical protein; protein id: At3g04700.1                                      | 0 | 0.24  | 1.17 | 1.5 | 0.60 | 4 Up late |
| A010669_01 | At3g19550     | expressed protein; protein id: At3g19550.1                                         | 0 | 0.32  | 2.05 | 2.4 | 0.05 | 4 Up late |
| A010701_01 | At3g16040     | expressed protein; protein id: At3g16040.1                                         | 0 | -0.45 | 1.32 | 1.1 | 5.44 | 4 Up late |
| A010790_01 | At3g10520     | class 2 non-symbiotic hemoglobin; protein id: At3g10520.1                          | 0 | 0.17  | 1.03 | 1.4 | 1.11 | 4 Up late |
| A010822_01 | At3g13810     | zinc finger protein, putative; protein id: At3g13810.1                             | 0 | 0.06  | 1.11 | 2.2 | 0.05 | 4 Up late |
| A010902_01 | At3g57330     | potential calcium-transporting ATPase 11, plasma membrane; protein id: At3g57330.1 | 0 | 0.31  | 1.55 | 2.3 | 0.05 | 4 Up late |
| A010949_01 | At3g61900     | putative protein; protein id: At3g61900.1                                          | 0 | 0.35  | 2.88 | 2.3 | 0.05 | 4 Up late |
| A010961_01 | At3g59140     | ABC transporter family protein; protein id: At3g59140.1                            | 0 | -0.67 | 1.31 | 1.7 | 0.27 | 4 Up late |
| A011146_01 | At3g49570     | hypothetical protein; protein id: At3g49570.1                                      | 0 | -0.74 | 3.28 | 2.3 | 0.05 | 4 Up late |
| A011331_01 | At3g48180     | hypothetical protein; protein id: At3g48180.1                                      | 0 | 0.02  | 1.02 | 1.8 | 0.19 | 4 Up late |
| A011359_01 | At3g57510     | polygalacturonase, putative; protein id: At3g57510.1                               | 0 | 0.98  | 5.37 | 6.1 | 0.05 | 4 Up late |
| A011532_01 | At3g49780     | putative protein; protein id: At3g49780.1                                          | 0 | 0.53  | 3.48 | 6.7 | 0.05 | 4 Up late |
| A011622_01 | At3g21250     | ABC transporter family protein; protein id: At3g21250.1                            | 0 | 0.31  | 1.50 | 1.8 | 0.19 | 4 Up late |
| A011788_01 | At3g21360     | unknown protein; protein id: At3g21360.1                                           | 0 | 0.32  | 1.21 | 1.6 | 0.36 | 4 Up late |
| A011811_01 | At3g19710     | branched-chain amino acid aminotransferase, cytosolic; protein id: At3g19710.1     | 0 | 0.38  | 4.95 | 2.3 | 0.05 | 4 Up late |
| A011896_01 | At3g07820     | polygalacturonase, putative; protein id: At3g07820.1                               | 0 | 0.40  | 1.84 | 2.3 | 0.05 | 4 Up late |
| A012049_01 | At3g02875     | IAA-amino acid hydrolase (ILR1); protein id: At3g02875.1                           | 0 | 0.52  | 2.03 | 1.9 | 0.11 | 4 Up late |
| A012104_01 | At3g25165     | expressed protein; protein id: At3g25165.1                                         | 0 | 0.36  | 1.50 | 1.6 | 0.41 | 4 Up late |
| A012113_01 | At3g02750     | protein phosphatase 2C (PP2C); protein id: At3g02750.1                             | 0 | 0.34  | 1.35 | 1.7 | 0.27 | 4 Up late |
| A012116_01 | At3g12520     | sulphate transporter, putative; protein id: At3g12520.1                            | 0 | -0.68 | 1.18 | 1.9 | 0.11 | 4 Up late |
| A012119_01 | At3g47420     | putative protein; protein id: At3g47420.1                                          | 0 | -0.46 | 1.38 | 1.7 | 0.36 | 4 Up late |
| A012257_01 | At3g10340     | putative phenylalanine ammonia-lyase; protein id: At3g10340.1                      | 0 | -0.50 | 2.68 | 2.9 | 0.05 | 4 Up late |
| A012398_01 | At3g11650     | hairpin-induced protein, putative (HIN1); protein id: At3g11650.1                  | 0 | 0.26  | 1.15 | 2.2 | 0.05 | 4 Up late |
| A012467_01 | At3g21230     | putative 4-coumarate:CoA ligase 2; protein id: At3g21230.1                         | 0 | 0.44  | 2.52 | 2.1 | 0.08 | 4 Up late |
| A012595_01 | At3g62640     | putative protein; protein id: At3g62640.1                                          | 0 | 0.18  | 1.14 | 1.2 | 2.11 | 4 Up late |
| A012678_01 | At3g15510     | putative jasmonic acid regulatory protein; protein id: At3g15510.1                 | 0 | 0.37  | 3.66 | 4.9 | 0.05 | 4 Up late |
| A012724_01 | At3g53350     | putative protein; protein id: At3g53350.1                                          | 0 | 0.17  | 1.11 | 1.5 | 0.47 | 4 Up late |
| A012810_01 | At3g56240     | copper homeostasis factor; protein id: At3g56240.1                                 | 0 | 0.50  | 2.84 | 2.8 | 0.05 | 4 Up late |
| A012811_01 | At3g11670     | digalactosyldiacylglycerol synthase; protein id: At3g11670.1                       | 0 | 0.02  | 1.11 | 2.2 | 0.05 | 4 Up late |
| A012872_01 | At4g23990     | cellulose synthase catalytic subunit - like protein; protein id: At4g23990.1       | 0 | -1.12 | 2.44 | 3.0 | 0.05 | 4 Up late |
| A012986_01 | At4g28085     | expressed protein; protein id: At4g28085.1                                         | 0 | 0.55  | 3.24 | 5.5 | 0.05 | 4 Up late |
| A013627_01 | At4g36490     | expressed protein; protein id: At4g36490.1                                         | 0 | 0.42  | 1.71 | 1.9 | 0.17 | 4 Up late |
| A013732_01 | At4g21990     | PRH26 protein; protein id: At4g21990.1                                             | 0 | -0.56 | 1.33 | 1.8 | 0.23 | 4 Up late |

|            |           |                                                     |   |       |      |     |      |           |
|------------|-----------|-----------------------------------------------------|---|-------|------|-----|------|-----------|
| A013744_01 | At4g22570 | adenine phosphoribosyltransferase (EC 2.4.2.        | 0 | 0.28  | 1.36 | 2.0 | 0.08 | 4 Up late |
| A014017_01 | At4g10380 | major intrinsic protein (MIP) - like; protein id: A | 0 | -0.97 | 1.92 | 3.1 | 0.05 | 4 Up late |
| A014581_01 | At4g30530 | putative protein; protein id: At4g30530.1           | 0 | -0.04 | 1.75 | 2.1 | 0.08 | 4 Up late |
| A014611_01 | At4g01070 | putative flavonol glucosyltransferase; protein i    | 0 | 0.71  | 2.64 | 2.2 | 0.05 | 4 Up late |
| A014667_01 | At4g27390 | putative protein; protein id: At4g27390.1           | 0 | 0.19  | 1.27 | 2.3 | 0.05 | 4 Up late |
| A014746_01 | At4g27960 | E2, ubiquitin-conjugating enzyme 9 (UBC9); p        | 0 | 0.08  | 1.40 | 1.5 | 0.60 | 4 Up late |
| A014759_01 | xxxx      | b/t disease resistance protein (TIR-NBS class       | 0 | 0.21  | 1.71 | 2.0 | 0.08 | 4 Up late |
| A014876_01 | At4g11330 | MAP kinase (ATMPK5); protein id: At4g11330          | 0 | 0.57  | 2.70 | 2.0 | 0.08 | 4 Up late |
| A015380_01 | At4g15160 | cell wall protein like; protein id: At4g15160.1     | 0 | -0.92 | 1.19 | 3.4 | 0.05 | 4 Up late |
| A015483_01 | At4g03050 | putative oxidoreductase; protein id: At4g03050      | 0 | -1.08 | 2.44 | 2.8 | 0.05 | 4 Up late |
| A015487_01 | At4g29880 | putative protein; protein id: At4g29880.1           | 0 | 0.08  | 1.14 | 1.6 | 0.36 | 4 Up late |
| A015548_01 | At5g04180 | carbonate dehydratase - like protein; protein id    | 0 | 0.30  | 1.52 | 1.5 | 0.60 | 4 Up late |
| A015591_01 | At5g15800 | MADS-box protein AGL2; protein id: At5g15800        | 0 | 0.28  | 1.09 | 1.3 | 1.42 | 4 Up late |
| A015641_01 | At5g63030 | glutaredoxin-like protein; protein id: At5g63030    | 0 | 0.46  | 1.67 | 2.6 | 0.05 | 4 Up late |
| A015967_01 | At5g47530 | putative protein; protein id: At5g47530.1           | 0 | 0.38  | 4.15 | 1.5 | 0.75 | 4 Up late |
| A016055_01 | At5g07430 | pectinesterase family; protein id: At5g07430.1      | 0 | 0.24  | 1.61 | 1.9 | 0.11 | 4 Up late |
| A016238_01 | At5g54160 | O-methyltransferase 1; protein id: At5g54160.       | 0 | -0.97 | 1.70 | 2.2 | 0.05 | 4 Up late |
| A016282_01 | At5g58320 | putative protein; protein id: At5g47050.1           | 0 | -0.13 | 1.59 | 1.2 | 2.11 | 4 Up late |
| A016393_01 | At5g59310 | nonspecific lipid-transfer protein precursor - lik  | 0 | 0.26  | 1.56 | 1.9 | 0.11 | 4 Up late |
| A016402_01 | At5g10180 | sulfate transporter; protein id: At5g10180.1        | 0 | 0.08  | 4.64 | 3.8 | 0.05 | 4 Up late |
| A016423_01 | At5g46770 | expressed protein; protein id: At5g46770.1          | 0 | 0.31  | 1.52 | 2.2 | 0.05 | 4 Up late |
| A016462_01 | At5g17420 | cellulose synthase catalytic subunit (IRX3); pr     | 0 | -0.91 | 1.12 | 2.4 | 0.05 | 4 Up late |
| A016473_01 | At5g01200 | myb family transcription factor; protein id: At5g   | 0 | 0.27  | 1.35 | 1.3 | 1.42 | 4 Up late |
| A016588_01 | At5g01360 | putative protein; protein id: At5g01360.1           | 0 | 0.42  | 2.32 | 1.2 | 2.11 | 4 Up late |
| A016615_01 | At5g02090 | putative protein; protein id: At5g02090.1           | 0 | 1.06  | 4.00 | 2.1 | 0.05 | 4 Up late |
| A016762_01 | At5g61340 | putative protein; protein id: At5g61340.1           | 0 | 0.03  | 1.99 | 2.6 | 0.05 | 4 Up late |
| A016836_01 | At5g49630 | amino acid permease 6 (emb CAA65051.1); p           | 0 | 0.33  | 1.88 | 2.4 | 0.05 | 4 Up late |
| A016898_01 | At5g59430 | telomere repeat-binding protein; protein id: At     | 0 | 0.43  | 1.84 | 3.3 | 0.05 | 4 Up late |
| A016930_01 | At5g60600 | putative protein; protein id: At5g60600.1           | 0 | -0.05 | 1.17 | 2.3 | 0.05 | 4 Up late |
| A016951_01 | At5g49660 | receptor protein kinase; protein id: At5g49660      | 0 | -0.02 | 1.73 | 1.8 | 0.19 | 4 Up late |
| A017003_01 | At5g05200 | unknown protein                                     | 0 | 0.41  | 1.56 | 2.3 | 0.05 | 4 Up late |
| A017035_01 | At5g02480 | putative protein; protein id: At5g02480.1           | 0 | 0.07  | 1.00 | 1.4 | 1.11 | 4 Up late |
| A017046_01 | At5g24530 | flavanone 3-hydroxylase-like protein; protein id    | 0 | 0.24  | 1.86 | 1.9 | 0.11 | 4 Up late |
| A017160_01 | At5g57800 | lipid transfer protein; glossy1 homolog; protei     | 0 | 0.27  | 1.43 | 2.2 | 0.05 | 4 Up late |
| A017564_01 | At5g61420 | myb-related transcription factor(mixta), putativ    | 0 | 0.17  | 1.82 | 2.3 | 0.05 | 4 Up late |
| A017653_01 | At5g53590 | unknown protein; protein id: At5g53590.1            | 0 | 0.28  | 1.07 | 1.2 | 2.11 | 4 Up late |
| A017695_01 | At5g58770 | dehydrodolichyl diphosphate synthase (DEDC          | 0 | 0.94  | 3.36 | 3.0 | 0.05 | 4 Up late |
| A017974_01 | At5g50030 | putative protein; protein id: At5g50030.1           | 0 | 0.11  | 1.21 | 1.5 | 0.75 | 4 Up late |
| A017983_01 | At5g50130 | ribitol dehydrogenase-like; protein id: At5g501     | 0 | 0.31  | 1.60 | 1.3 | 1.42 | 4 Up late |
| A017995_01 | At5g44030 | cellulose synthase catalytic subunit-like protei    | 0 | -0.18 | 1.62 | 2.3 | 0.05 | 4 Up late |
| A018032_01 | At5g09220 | amino acid transport protein AAP2                   | 0 | -0.40 | 1.78 | 2.2 | 0.05 | 4 Up late |
| A018064_01 | At5g50920 | ATP-dependent Clp protease ATP-binding sul          | 0 | 0.23  | 1.30 | 2.1 | 0.05 | 4 Up late |
| A018163_01 | At5g56840 | putative protein; protein id: At5g56840.1           | 0 | -0.30 | 1.77 | 2.1 | 0.08 | 4 Up late |
| A018259_01 | At5g39090 | acyltransferase -like protein; protein id: At5g3    | 0 | 0.30  | 3.14 | 3.3 | 0.05 | 4 Up late |
| A018510_01 | At5g14970 | seed maturation-like protein; protein id: At5g1     | 0 | 0.32  | 1.18 | 2.2 | 0.05 | 4 Up late |

|            |               |                                                       |   |       |      |     |      |           |
|------------|---------------|-------------------------------------------------------|---|-------|------|-----|------|-----------|
| A018516_01 | At5g15110     | pectate lyase -like protein; protein id: At5g151      | 0 | 0.33  | 1.45 | 1.5 | 0.60 | 4 Up late |
| A018607_01 | At5g54530     | putative protein; protein id: At5g54530.1             | 0 | 0.07  | 1.53 | 1.9 | 0.11 | 4 Up late |
| A018618_01 | At5g23090     | TATA-binding protein-associated phosphopro            | 0 | 0.04  | 1.01 | 1.2 | 5.44 | 4 Up late |
| A018655_01 | At5g52950     | putative protein; protein id: At5g52950.1             | 0 | 0.20  | 1.99 | 2.5 | 0.05 | 4 Up late |
| A018665_01 | At5g35475     | similar to Ac-like transposase; protein id: At5g      | 0 | 0.26  | 1.18 | 1.2 | 2.11 | 4 Up late |
| A018672_01 | At5g35170     | adenylate kinase -like protein; protein id: At5g      | 0 | 0.25  | 1.25 | 1.7 | 0.36 | 4 Up late |
| A018709_01 | At5g44780     | unknown protein; protein id: At5g44780.1              | 0 | -0.12 | 1.63 | 2.1 | 0.05 | 4 Up late |
| A018781_01 | At5g17670     | putative protein; protein id: At5g17670.1             | 0 | 0.21  | 1.46 | 1.7 | 0.27 | 4 Up late |
| A018823_01 | At5g40960     | putative protein; protein id: At5g40960.1             | 0 | 0.19  | 2.47 | 3.1 | 0.05 | 4 Up late |
| A018933_01 | At5g13550     | sulfate transporter; protein id: At5g13550.1          | 0 | 0.26  | 1.56 | 1.9 | 0.11 | 4 Up late |
| A018935_01 | At5g50800     | MtN3-like protein; protein id: At5g50800.1            | 0 | 0.46  | 2.95 | 1.8 | 0.19 | 4 Up late |
| A019086_01 | At5g15140     | putative aldose 1-epimerase - like protein; pro       | 0 | 0.38  | 1.38 | 1.9 | 0.11 | 4 Up late |
| A019451_01 | At1g64060     | cytochrome b245 beta chain homolog RbohA <sub>4</sub> | 0 | 0.37  | 1.77 | 1.2 | 2.11 | 4 Up late |
| A019472_01 | At1g65480     | flowering signals mediating protein FT; proteir       | 0 | 1.00  | 4.61 | 5.7 | 0.05 | 4 Up late |
| A019474_01 | At1g55560     | pectinesterase (pectin methylesterase) family;        | 0 | 0.37  | 1.74 | 2.4 | 0.05 | 4 Up late |
| A019520_01 | At4g21900     | putative protein; protein id: At4g21900.1             | 0 | -0.06 | 1.40 | 1.1 | 5.44 | 4 Up late |
| A019576_01 | At4g29100     | putative protein; protein id: At4g29100.1             | 0 | 0.34  | 1.44 | 1.6 | 0.36 | 4 Up late |
| A019758_01 | At4g13770     | cytochrome p450 family; protein id: At4g13770         | 0 | 0.04  | 3.75 | 4.0 | 0.05 | 4 Up late |
| A019785_01 | At1g13210     | potential phospholipid-transporting ATPase 11         | 0 | 0.11  | 1.56 | 1.9 | 0.11 | 4 Up late |
| A019893_01 | At1g64780     | ammonium transporter, putative; protein id: A         | 0 | 0.71  | 2.70 | 2.4 | 0.05 | 4 Up late |
| A019964_01 | At1g74660     | expressed protein; protein id: At1g74660.1            | 0 | 0.12  | 1.47 | 1.4 | 0.75 | 4 Up late |
| A019971_01 | At3g01270     | putative pectate lyase; protein id: At3g01270.1       | 0 | 0.47  | 1.80 | 1.9 | 0.17 | 4 Up late |
| A019975_01 | At3g01060     | unknown protin; protein id: At3g01060.1               | 0 | -0.05 | 1.04 | 1.9 | 0.17 | 4 Up late |
| A019976_01 | At3g03780     | putative methionine synthase; protein id: At3g        | 0 | -0.69 | 1.37 | 1.8 | 0.19 | 4 Up late |
| A019995_01 | At1g78070     | expressed protein; protein id: At1g78070.1            | 0 | 0.02  | 1.07 | 1.5 | 0.60 | 4 Up late |
| A020008_01 | At2g39420     | putative phospholipase; protein id: At2g39420         | 0 | -0.35 | 1.42 | 2.1 | 0.05 | 4 Up late |
| A020022_01 | At5g13750     | transporter-like protein                              | 0 | 0.12  | 1.93 | 2.3 | 0.05 | 4 Up late |
| A020186_01 | At4g36220     | ferulate-5-hydroxylase (FAH1); protein id: At4g       | 0 | -0.45 | 1.67 | 2.8 | 0.05 | 4 Up late |
| A020187_01 | At3g62020     | germin-like protein (GLP10); protein id: At3g6        | 0 | -0.37 | 1.63 | 1.6 | 0.36 | 4 Up late |
| A020258_01 | At5g22630     | chorismate mutase/prephenate dehydratase-l            | 0 | -0.40 | 1.36 | 1.7 | 0.36 | 4 Up late |
| A020260_01 | At3g01700     | arabinogalactan-protein (AGP11); protein id: A        | 0 | 0.20  | 1.21 | 2.3 | 0.05 | 4 Up late |
| A020306_01 | At1g74410     | putative RING zinc finger protein; protein id: A      | 0 | 0.27  | 1.29 | 1.8 | 0.23 | 4 Up late |
| A020345_01 | At2g45530     | expressed protein; protein id: At2g45530.1            | 0 | 0.23  | 1.29 | 2.1 | 0.08 | 4 Up late |
| A020427_01 | At1g56610     | unknown protein; protein id: At1g56610.1              | 0 | 0.34  | 1.24 | 1.6 | 0.36 | 4 Up late |
| A020671_01 | At4g27580     | expressed protein; protein id: At4g27580.1            | 0 | 0.00  | 1.19 | 2.2 | 0.05 | 4 Up late |
| A020760_01 | At4g32940     | gamma-VPE (vacuolar processing enzyme); p             | 0 | 0.35  | 2.81 | 3.3 | 0.05 | 4 Up late |
| A020806_01 | At2g30860     | glutathione transferase, putative; protein id: At     | 0 | -0.12 | 1.25 | 1.7 | 0.27 | 4 Up late |
| A020855_01 | At3g27925     | DegP protease; protein id: At3g27925.1                | 0 | 0.40  | 1.83 | 2.7 | 0.05 | 4 Up late |
| A020880_01 | At4g34050     | caffeoyl-CoA 3-O-methyltransferase; protein id        | 0 | -0.25 | 1.82 | 2.7 | 0.05 | 4 Up late |
| A020980_01 | At5g40370     | glutaredoxin -like protein; protein id: At5g4037      | 0 | 0.22  | 1.67 | 2.4 | 0.05 | 4 Up late |
| A021072_01 | At1g23130     | Csf-2-related; protein id: At1g23130.1                | 0 | 0.90  | 4.54 | 3.5 | 0.05 | 4 Up late |
| A021097_01 | At5g42980     | thioredoxin (clone GIF1) (pir S58118); protein        | 0 | 0.17  | 1.21 | 1.2 | 2.11 | 4 Up late |
| A021137_01 | At1g64370     | expressed protein; protein id: At1g64370.1            | 0 | 0.94  | 4.14 | 3.6 | 0.05 | 4 Up late |
| A021209_01 | not annotated | Chr4 C/16247353-1624739616247353-16247                | 0 | 0.34  | 1.72 | 2.3 | 0.05 | 4 Up late |
| A021230_01 | At3g49580     | putative protein; protein id: At3g49580.1             | 0 | -0.60 | 3.82 | 2.5 | 0.05 | 4 Up late |

|            |           |                                                    |   |       |      |     |      |           |
|------------|-----------|----------------------------------------------------|---|-------|------|-----|------|-----------|
| A021339_01 | At5g01610 | putative protein; protein id: At5g01610.1          | 0 | 0.22  | 1.15 | 1.3 | 1.11 | 4 Up late |
| A021354_01 | At3g28080 | expressed protein; protein id: At3g28080.1         | 0 | -0.11 | 1.56 | 1.1 | 5.44 | 4 Up late |
| A021377_01 | At3g26860 | putative self-incompatibility protein; protein id: | 0 | -0.14 | 1.18 | 1.7 | 0.36 | 4 Up late |
| A021419_01 | At5g24660 | putative protein; protein id: At5g24660.1          | 0 | -0.38 | 2.75 | 2.4 | 0.05 | 4 Up late |
| A021538_01 | At1g75440 | E2, ubiquitin-conjugating enzyme 16 (UBC16)        | 0 | 0.30  | 1.26 | 1.5 | 0.60 | 4 Up late |
| A021557_01 | At1g51250 | unknown protein; protein id: At1g51250.1           | 0 | -0.31 | 1.15 | 1.7 | 0.36 | 4 Up late |
| A021595_01 | At2g29370 | putative tropinone reductase; protein id: At2g2    | 0 | 0.07  | 3.13 | 2.7 | 0.05 | 4 Up late |
| A021659_01 | At2g07640 | unknown protein; protein id: At2g07640.1           | 0 | 0.22  | 1.24 | 2.0 | 0.08 | 4 Up late |
| A021893_01 | At4g04830 | putative protein; protein id: At4g04830.1          | 0 | -0.14 | 3.19 | 4.7 | 0.05 | 4 Up late |
| A021920_01 | At5g63330 | putative protein; protein id: At5g63330.1          | 0 | 0.18  | 1.25 | 1.9 | 0.11 | 4 Up late |
| A021976_01 | At1g62080 | expressed protein; protein id: At1g62080.1         | 0 | 0.39  | 4.27 | 1.3 | 1.42 | 4 Up late |
| A022001_01 | At1g62000 | hypothetical protein; protein id: At1g62000.1      | 0 | -0.28 | 3.08 | 1.7 | 0.36 | 4 Up late |
| A022358_01 | At4g23260 | putative protein; protein id: At4g23260.1          | 0 | 0.91  | 3.35 | 2.1 | 0.08 | 4 Up late |
| A022502_01 | At4g27820 | glycosyl hydrolase family 1; protein id: At4g27    | 0 | 0.34  | 1.24 | 2.0 | 0.08 | 4 Up late |
| A022643_01 | At5g01570 | putative protein; protein id: At5g01570.1          | 0 | -0.06 | 1.59 | 2.3 | 0.05 | 4 Up late |
| A022657_01 | At3g45950 | putative protein; protein id: At3g45950.1          | 0 | -0.21 | 1.04 | 2.0 | 0.08 | 4 Up late |
| A022804_01 | At3g30280 | acyltransferase family; protein id: At3g30280.1    | 0 | 0.17  | 1.50 | 1.7 | 0.23 | 4 Up late |
| A023091_01 | At5g40240 | putative protein; protein id: At5g40240.1          | 0 | -0.20 | 1.30 | 1.2 | 2.11 | 4 Up late |
| A023114_01 | At5g47340 | palmitoyl-protein thioesterase precursor-like; p   | 0 | 0.07  | 1.06 | 1.2 | 5.44 | 4 Up late |
| A023272_01 | At1g21720 | 20S proteasome beta subunit C (PBC1); prote        | 0 | 0.34  | 1.36 | 2.4 | 0.05 | 4 Up late |
| A023386_01 | At2g45800 | putative LIM-domain protein; protein id: At2g4     | 0 | 0.32  | 1.13 | 1.5 | 0.60 | 4 Up late |
| A023620_01 | At2g31500 | putative calcium-dependent protein kinase; pr      | 0 | -0.38 | 1.03 | 1.7 | 0.27 | 4 Up late |
| A023721_01 | At1g14880 | unknown protein; protein id: At1g14880.1           | 0 | 0.73  | 4.28 | 1.5 | 0.60 | 4 Up late |
| A023802_01 | At1g23350 | conserved hypothetical protein; protein id: At1    | 0 | 0.35  | 2.20 | 1.6 | 0.47 | 4 Up late |
| A024038_01 | At1g75280 | isoflavone reductase homolog P3; protein id: /     | 0 | -0.97 | 2.81 | 2.2 | 0.05 | 4 Up late |
| A024039_01 | At1g75300 | isoflavone reductase homolog P3, putative; pr      | 0 | -1.46 | 1.37 | 2.2 | 0.05 | 4 Up late |
| A024063_01 | At3g03430 | pollen allergen Bra r II; protein id: At3g03430.1  | 0 | 0.34  | 1.35 | 1.7 | 0.27 | 4 Up late |
| A024092_01 | At3g04090 | hypothetical protein; protein id: At3g04090.1      | 0 | -0.04 | 1.24 | 2.9 | 0.05 | 4 Up late |
| A024183_01 | At5g55930 | sexual differentiation process protein ISP4-like   | 0 | 0.13  | 1.18 | 2.1 | 0.08 | 4 Up late |
| A024250_01 | At1g23740 | putative auxin-induced protein; protein id: At1g   | 0 | 0.17  | 1.07 | 1.4 | 1.11 | 4 Up late |
| A024292_01 | At1g08930 | zinc finger protein ATZF1, putative; protein id:   | 0 | 0.29  | 1.30 | 1.8 | 0.19 | 4 Up late |
| A024447_01 | At1g71880 | sucrose transport protein SUC1; protein id: At     | 0 | 0.45  | 2.25 | 2.9 | 0.05 | 4 Up late |
| A024464_01 | At5g16570 | expressed protein; protein id: At5g16570.1         | 0 | -0.37 | 2.93 | 3.4 | 0.05 | 4 Up late |
| A024502_01 | At2g41380 | putative embryo-abundant protein; protein id: .    | 0 | 0.72  | 3.62 | 1.5 | 0.60 | 4 Up late |
| A024508_01 | At3g28940 | AIG2-like protein; protein id: At3g28940.1         | 0 | 0.24  | 1.39 | 2.6 | 0.05 | 4 Up late |
| A024512_01 | At3g19450 | cinnamyl alcohol dehydrogenase; protein id: A      | 0 | -0.35 | 1.03 | 1.2 | 5.44 | 4 Up late |
| A024653_01 | At5g59700 | receptor-like protein kinase precursor - like; pr  | 0 | 0.00  | 1.50 | 3.1 | 0.05 | 4 Up late |
| A024822_01 | At3g46520 | A.t. DNA chromosome 3, BAC clone T23J7, a          | 0 | 0.32  | 1.27 | 2.2 | 0.05 | 4 Up late |
| A024873_01 | At4g18220 | putative protein; protein id: At4g18220.1          | 0 | 0.55  | 1.98 | 1.4 | 0.75 | 4 Up late |
| A025313_01 | At1g76680 | 12-oxophytodienoate reductase (OPR1); prote        | 0 | -0.08 | 1.70 | 2.0 | 0.08 | 4 Up late |
| A025869_01 | At2g47030 | pectinesterase family; protein id: At2g47030.1     | 0 | 0.27  | 1.34 | 1.5 | 0.47 | 4 Up late |
| A025937_01 | At3g14650 | cytochrome P450, putative; protein id: At3g14      | 0 | 0.14  | 1.04 | 1.6 | 0.41 | 4 Up late |
| A000790_01 | At1g68600 | expressed protein; protein id: At1g68600.1         | 0 | 0.22  | 1.92 | 1.9 | 0.08 | 4 Up late |
| A003140_01 | At1g56260 | hypothetical protein; protein id: At1g56260.1      | 0 | 0.13  | 1.53 | 2.5 | 0.05 | 4 Up late |
| A003526_01 | At1g69610 | unknown protein; protein id: At1g69610.1           | 0 | 0.54  | 3.39 | 1.4 | 1.11 | 4 Up late |

|            |           |                                                    |   |       |       |     |      |                            |
|------------|-----------|----------------------------------------------------|---|-------|-------|-----|------|----------------------------|
| A004572_01 | At1g11580 | pectin methylesterase, putative; protein id: At1   | 0 | 0.10  | 1.07  | 1.2 | 2.11 | 4 Up late                  |
| A006166_01 | At2g46650 | putative cytochrome b5; protein id: At2g46650      | 0 | -0.88 | 2.43  | 1.4 | 0.75 | 4 Up late                  |
| A006299_01 | At2g35060 | putative potassium transporter; protein id: At2    | 0 | 0.17  | 1.44  | 1.4 | 1.11 | 4 Up late                  |
| A008284_01 | At2g29670 | expressed protein; protein id: At2g29670.1         | 0 | -0.64 | 1.01  | 1.7 | 0.27 | 4 Up late                  |
| A009259_01 | At3g44450 | putative protein; protein id: At3g44450.1          | 0 | -0.51 | 2.55  | 2.5 | 0.05 | 4 Up late                  |
| A019856_01 | At2g47880 | putative glutaredoxin; protein id: At2g47880.1     | 0 | 0.07  | 4.14  | 1.5 | 0.60 | 4 Up late                  |
| A020865_01 | At4g18780 | cellulose synthase - like protein; protein id: At  | 0 | -1.30 | 1.34  | 1.4 | 0.75 | 4 Up late                  |
| A020877_01 | At5g03170 | fasciclin-like arabinogalactan-protein (FLA11);    | 0 | -0.79 | 1.45  | 2.0 | 0.08 | 4 Up late                  |
| A022787_01 | xxxx      | b/t hypothetical protein At3g32896 and similar     | 0 | -0.06 | 1.49  | 1.1 | 5.44 | 4 Up late                  |
| A009384_01 | At3g16920 | glycosyl hydrolase family 19 (chitinase); protei   | 0 | 0.27  | 2.85  | 2.1 | 0.08 | 4 Up late                  |
| A014149_01 | At4g19170 | 9-cis-epoxycarotenoid dioxygenase (neoxanth        | 0 | 0.40  | 3.23  | 1.4 | 0.75 | 4 Up late                  |
| A024446_01 | At4g04610 | 5-adenylylsulfate reductase; protein id: At4g04    | 0 | -0.99 | 2.10  | 2.2 | 0.05 | 4 Up late                  |
| A001491_01 | At1g67870 | expressed protein; protein id: At1g67870.1         | 0 | 0.69  | 2.44  | 1.8 | 0.23 | 4 Up late                  |
| A002620_01 | At1g12280 | disease resistance protein (CC-NBS-LRR clas        | 0 | 0.32  | 1.48  | 2.0 | 0.08 | 4 Up late                  |
| A004957_01 | At5g27280 | putative protein; protein id: At5g27280.1          | 0 | 0.30  | 1.45  | 2.4 | 0.05 | 4 Up late                  |
| A006526_01 | At2g43120 | similar to pirin-like protein; protein id: At2g431 | 0 | -0.34 | 1.74  | 2.5 | 0.05 | 4 Up late                  |
| A007253_01 | At2g20610 | putative tyrosine aminotransferase; protein id:    | 0 | -0.12 | 1.63  | 1.8 | 0.23 | 4 Up late                  |
| A009717_01 | At3g19150 | Kip-related protein 6; protein id: At3g19150.1     | 0 | 0.15  | 1.51  | 2.0 | 0.08 | 4 Up late                  |
| A019079_01 | At5g43150 | unknown protein; protein id: At5g43150.1           | 0 | -0.31 | 1.79  | 2.4 | 0.05 | 4 Up late                  |
| A026000_01 | At3g14660 | cytochrome P450, putative; protein id: At3g14      | 0 | 0.26  | 1.17  | 1.6 | 0.47 | 4 Up late                  |
| A000064_01 | At1g68060 | unknown protein; protein id: At1g68060.1           | 0 | -0.80 | -1.41 | 1.3 | 1.11 | 5 Down early and sustained |
| A000259_01 | At1g66350 | RGL1;protein id: At1g66350.1                       | 0 | -1.19 | -1.25 | 1.6 | 0.36 | 5 Down early and sustained |
| A000348_01 | At1g80280 | unknown protein; protein id: At1g80280.1           | 0 | -2.20 | -1.92 | 2.4 | 0.05 | 5 Down early and sustained |
| A000352_01 | At1g80270 | hypothetical protein; protein id: At1g80270.1      | 0 | -1.72 | -2.33 | 1.8 | 0.17 | 5 Down early and sustained |
| A000358_01 | At1g63660 | GMP synthase; protein id: At1g63660.1              | 0 | -1.21 | -1.48 | 2.1 | 0.08 | 5 Down early and sustained |
| A000553_01 | At1g11820 | glycosyl hydrolase family 17; protein id: At1g1    | 0 | -0.80 | -1.23 | 1.9 | 0.11 | 5 Down early and sustained |
| A001052_01 | At1g14980 | 10 kDa chaperonin (CPN10); protein id: At1g1       | 0 | -1.03 | -1.24 | 2.5 | 0.05 | 5 Down early and sustained |
| A001059_01 | At1g32900 | starch synthase, putative; protein id: At1g3290    | 0 | -0.92 | -1.31 | 1.7 | 0.27 | 5 Down early and sustained |
| A001102_01 | At1g07210 | hypothetical protein; protein id: At1g07210.1      | 0 | -1.18 | -1.63 | 2.4 | 0.05 | 5 Down early and sustained |
| A001137_01 | At1g30690 | expressed protein; protein id: At1g30690.1         | 0 | -1.14 | -1.39 | 1.5 | 0.60 | 5 Down early and sustained |
| A001144_01 | At1g72260 | thionin; protein id: At1g72260.1                   | 0 | -3.06 | -5.17 | 4.3 | 0.05 | 5 Down early and sustained |
| A001146_01 | At1g48920 | nucleolin, putative; protein id: At1g48920.1       | 0 | -0.65 | -1.05 | 1.6 | 0.47 | 5 Down early and sustained |
| A001166_01 | At1g45130 | glycosyl hydrolase family 35 (beta-galactosida     | 0 | -1.31 | -1.74 | 2.1 | 0.08 | 5 Down early and sustained |
| A001169_01 | At1g21750 | putative protein disulfide isomerase precursor     | 0 | -1.00 | -0.66 | 1.2 | 2.11 | 5 Down early and sustained |
| A001231_01 | At1g63940 | monodehydroascorbate reductase, putative; p        | 0 | -0.96 | -1.20 | 1.8 | 0.17 | 5 Down early and sustained |
| A001242_01 | At1g52400 | glycosyl hydrolase family 1, beta-glucosidase      | 0 | -3.67 | -5.98 | 3.7 | 0.05 | 5 Down early and sustained |
| A001302_01 | At1g69700 | AtHVA22c; protein id: At1g69700.1                  | 0 | -1.16 | -1.70 | 1.5 | 0.60 | 5 Down early and sustained |
| A001369_01 | At1g10522 | expressed protein; protein id: At1g10522.1         | 0 | -2.40 | -2.50 | 3.9 | 0.05 | 5 Down early and sustained |
| A001558_01 | At1g65290 | acyl carrier protein, putative; protein id: At1g6  | 0 | -0.70 | -1.02 | 1.5 | 0.47 | 5 Down early and sustained |
| A001578_01 | At1g51060 | histone H2A, putative; protein id: At1g51060.1     | 0 | -1.10 | -1.48 | 2.1 | 0.08 | 5 Down early and sustained |
| A001602_01 | At1g04590 | expressed protein; protein id: At1g04590.1         | 0 | -0.67 | -1.19 | 1.7 | 0.27 | 5 Down early and sustained |
| A001720_01 | At1g72290 | drought induced protein, putative; protein id: A   | 0 | -2.47 | -4.42 | 1.9 | 0.11 | 5 Down early and sustained |
| A001779_01 | At1g73940 | expressed protein; protein id: At1g73940.1         | 0 | -0.95 | -1.56 | 3.1 | 0.05 | 5 Down early and sustained |
| A001843_01 | At1g03475 | putative coproporphyrinogen III oxidase; prote     | 0 | -0.91 | -1.05 | 1.5 | 0.60 | 5 Down early and sustained |
| A001939_01 | At1g10370 | glutathione transferase, putative; protein id: At  | 0 | -0.95 | -1.03 | 1.4 | 0.75 | 5 Down early and sustained |

|            |           |                                                                                                         |   |       |       |     |      |                            |
|------------|-----------|---------------------------------------------------------------------------------------------------------|---|-------|-------|-----|------|----------------------------|
| A001996_01 | At1g07790 | histone H2B; protein id: At1g07790.1                                                                    | 0 | -1.13 | -1.06 | 1.7 | 0.23 | 5 Down early and sustained |
| A002079_01 | At1g77670 | putative aminotransferase; protein id: At1g77670.1                                                      | 0 | -1.15 | -0.77 | 1.8 | 0.19 | 5 Down early and sustained |
| A002094_01 | At1g74560 | putative SET protein, phosphatase 2A inhibitor; protein id: At1g74560.1                                 | 0 | -1.13 | -1.95 | 3.8 | 0.05 | 5 Down early and sustained |
| A002183_01 | At1g74430 | myb family transcription factor; protein id: At1g74430.1                                                | 0 | -1.25 | -1.85 | 1.6 | 0.41 | 5 Down early and sustained |
| A002413_01 | At1g16870 | unknown protein; protein id: At1g16870.1                                                                | 0 | -0.96 | -1.04 | 1.3 | 1.42 | 5 Down early and sustained |
| A002433_01 | At1g53130 | unknown protein; protein id: At1g53130.1                                                                | 0 | -2.98 | -4.68 | 2.1 | 0.05 | 5 Down early and sustained |
| A002484_01 | At1g76300 | small nuclear ribonucleoprotein, putative; protein id: At1g76300.1                                      | 0 | -0.80 | -1.03 | 1.8 | 0.17 | 5 Down early and sustained |
| A002678_01 | At1g61990 | hypothetical protein; protein id: At1g61990.1                                                           | 0 | -1.04 | -0.69 | 1.1 | 5.44 | 5 Down early and sustained |
| A002695_01 | At1g56340 | calreticulin (crt1); protein id: At1g56340.1                                                            | 0 | -1.54 | -2.28 | 2.1 | 0.05 | 5 Down early and sustained |
| A002774_01 | At1g61790 | hypothetical protein; protein id: At1g61790.1                                                           | 0 | -0.75 | -1.06 | 1.6 | 0.36 | 5 Down early and sustained |
| A002791_01 | At1g54030 | myosinase-associated protein, putative; protein id: At1g54030.1                                         | 0 | -1.30 | -2.09 | 1.6 | 0.41 | 5 Down early and sustained |
| A002999_01 | At1g56580 | expressed protein; protein id: At1g56580.1                                                              | 0 | -1.70 | -2.24 | 2.0 | 0.08 | 5 Down early and sustained |
| A003101_01 | At1g06550 | 3-hydroxyisobutyryl-coenzyme A hydrolase, putative; protein id: At1g06550.1                             | 0 | -1.67 | -1.11 | 1.6 | 0.36 | 5 Down early and sustained |
| A003138_01 | At1g78570 | dTDP-glucose 4,6-dehydratase, putative; protein id: At1g78570.1                                         | 0 | -1.24 | -2.19 | 2.5 | 0.05 | 5 Down early and sustained |
| A003409_01 | At1g21560 | hypothetical protein; protein id: At1g21560.1                                                           | 0 | -0.72 | -1.07 | 1.8 | 0.19 | 5 Down early and sustained |
| A003523_01 | At1g07220 | hypothetical protein; protein id: At1g07220.1                                                           | 0 | -1.04 | -1.40 | 2.3 | 0.05 | 5 Down early and sustained |
| A003653_01 | At1g08130 | ligase I, putative; protein id: At1g08130.1                                                             | 0 | -1.41 | -1.34 | 1.8 | 0.19 | 5 Down early and sustained |
| A003672_01 | At1g70490 | putative ADP-ribosylation factor 1; protein id: At1g70490.1                                             | 0 | -1.03 | -0.69 | 1.3 | 1.11 | 5 Down early and sustained |
| A003673_01 | At1g16780 | vacuolar-type H+translocating inorganic pyrophosphatase, putative; protein id: At1g16780.1              | 0 | -0.72 | -1.20 | 1.8 | 0.19 | 5 Down early and sustained |
| A003817_01 | At1g62280 | hypothetical protein; protein id: At1g62280.1                                                           | 0 | -1.09 | -1.16 | 1.2 | 2.11 | 5 Down early and sustained |
| A003844_01 | At1g52040 | myosinase-binding protein homolog, putative; protein id: At1g52040.1                                    | 0 | -3.29 | -5.19 | 3.1 | 0.05 | 5 Down early and sustained |
| A003860_01 | At1g70350 | hypothetical protein; protein id: At1g70350.1                                                           | 0 | -0.81 | -1.18 | 1.3 | 1.42 | 5 Down early and sustained |
| A003863_01 | At1g53230 | flower development protein cycloidea (cyc3), putative; protein id: At1g53230.1                          | 0 | -1.05 | -1.46 | 1.5 | 0.47 | 5 Down early and sustained |
| A003921_01 | At1g61570 | expressed protein; protein id: At1g61570.1                                                              | 0 | -0.88 | -1.26 | 1.9 | 0.17 | 5 Down early and sustained |
| A004320_01 | At1g32480 | NAD+ dependent isocitrate dehydrogenase subunit alpha, putative; protein id: At1g32480.1                | 0 | -2.58 | -3.55 | 3.4 | 0.05 | 5 Down early and sustained |
| A004454_01 | At1g57720 | elongation factor 1B-gamma, putative (eEF-1B); protein id: At1g57720.1                                  | 0 | -0.81 | -1.40 | 1.8 | 0.17 | 5 Down early and sustained |
| A004537_01 | At1g55360 | unknown protein; protein id: At1g55360.1                                                                | 0 | -0.86 | -1.29 | 1.4 | 0.75 | 5 Down early and sustained |
| A004557_01 | At1g09780 | putative 2,3-bisphosphoglycerate-independent phosphoglycerate kinase, putative; protein id: At1g09780.1 | 0 | -1.60 | -1.31 | 1.8 | 0.17 | 5 Down early and sustained |
| A004622_01 | At1g44970 | peroxidase, putative; protein id: At1g44970.1                                                           | 0 | -3.15 | -4.22 | 3.1 | 0.05 | 5 Down early and sustained |
| A004637_01 | At1g34430 | dihydrolipoamide S-acetyltransferase, putative; protein id: At1g34430.1                                 | 0 | -0.84 | -1.43 | 1.7 | 0.23 | 5 Down early and sustained |
| A004744_01 | At1g56330 | GTP-binding protein (SAR1B); protein id: At1g56330.1                                                    | 0 | -0.87 | -1.09 | 1.9 | 0.11 | 5 Down early and sustained |
| A004797_01 | At1g28710 | expressed protein; protein id: At1g28710.1                                                              | 0 | -2.13 | -3.29 | 1.9 | 0.11 | 5 Down early and sustained |
| A004839_01 | At1g32210 | defender against cell death protein, putative; protein id: At1g32210.1                                  | 0 | -0.78 | -1.05 | 1.7 | 0.23 | 5 Down early and sustained |
| A004853_01 | At1g18800 | expressed protein; protein id: At1g18800.1                                                              | 0 | -0.89 | -1.28 | 2.1 | 0.05 | 5 Down early and sustained |
| A004910_01 | At1g75330 | ornithine carbamoyltransferase precursor; protein id: At1g75330.1                                       | 0 | -0.69 | -1.08 | 1.3 | 1.42 | 5 Down early and sustained |
| A004927_01 | At3g49390 | RNA-binding protein, putative; protein id: At3g49390.1                                                  | 0 | -1.06 | -1.06 | 1.3 | 1.11 | 5 Down early and sustained |
| A005002_01 | At5g26707 | glutamyl-tRNA synthetase; protein id: At5g26707.1                                                       | 0 | -0.76 | -1.22 | 1.8 | 0.17 | 5 Down early and sustained |
| A005204_01 | At4g32210 | putative protein; protein id: At4g32210.1                                                               | 0 | -1.27 | -0.95 | 1.8 | 0.19 | 5 Down early and sustained |
| A005223_01 | At5g26800 | putative protein; protein id: At5g26800.1                                                               | 0 | -1.37 | -1.67 | 1.9 | 0.17 | 5 Down early and sustained |
| A005390_01 | At5g37020 | auxin response transcription factor (ARF8); protein id: At5g37020.1                                     | 0 | -0.97 | -1.52 | 1.8 | 0.19 | 5 Down early and sustained |
| A005661_01 | At1g24020 | Bet v I allergen family; protein id: At1g24020.1                                                        | 0 | -2.80 | -4.07 | 3.9 | 0.05 | 5 Down early and sustained |
| A005680_01 | At1g20430 | expressed protein; protein id: At1g20430.1                                                              | 0 | -1.17 | -1.67 | 2.4 | 0.05 | 5 Down early and sustained |
| A005715_01 | At1g27435 | expressed protein; protein id: At1g27435.1                                                              | 0 | -1.10 | -1.17 | 1.9 | 0.17 | 5 Down early and sustained |
| A005722_01 | At1g60770 | hypothetical protein; protein id: At1g60770.1                                                           | 0 | -0.83 | -1.42 | 1.8 | 0.19 | 5 Down early and sustained |
| A005723_01 | At1g60660 | cytochrome b5, putative; protein id: At1g60660.1                                                        | 0 | -1.03 | -1.72 | 2.1 | 0.08 | 5 Down early and sustained |

|            |           |                                                                                         |   |       |       |     |      |                            |
|------------|-----------|-----------------------------------------------------------------------------------------|---|-------|-------|-----|------|----------------------------|
| A005726_01 | At3g62030 | peptidylprolyl isomerase ROC4; protein id: At3g62030.1                                  | 0 | -1.08 | -1.85 | 2.1 | 0.08 | 5 Down early and sustained |
| A005730_01 | At2g22670 | auxin-regulated protein (IAA8); protein id: At2g22670.1                                 | 0 | -1.36 | -1.58 | 1.7 | 0.27 | 5 Down early and sustained |
| A005742_01 | At3g08580 | adenylate translocator; protein id: At3g08580.1                                         | 0 | -0.66 | -1.10 | 1.5 | 0.47 | 5 Down early and sustained |
| A005754_01 | At4g11290 | peroxidase, putative; protein id: At4g11290.1                                           | 0 | -1.37 | -0.92 | 1.4 | 1.11 | 5 Down early and sustained |
| A005864_01 | At1g75500 | nodulin-like protein; protein id: At1g75500.1                                           | 0 | -0.92 | -1.11 | 1.7 | 0.27 | 5 Down early and sustained |
| A005984_01 | At1g75680 | glycosyl hydrolase family 9; protein id: At1g75680.1                                    | 0 | -1.40 | -1.52 | 1.1 | 5.44 | 5 Down early and sustained |
| A006040_01 | At2g47650 | putative dTDP-glucose 4-6-dehydratase; protein id: At2g47650.1                          | 0 | -1.08 | -0.72 | 1.3 | 1.42 | 5 Down early and sustained |
| A006041_01 | At2g43360 | biotin synthase (Bio B); protein id: At2g43360.1                                        | 0 | -1.40 | -2.19 | 3.7 | 0.05 | 5 Down early and sustained |
| A006226_01 | At2g30200 | putative malonyl-CoA:Acyl carrier protein transacylase; protein id: At2g30200.1         | 0 | -1.00 | -1.71 | 2.3 | 0.05 | 5 Down early and sustained |
| A006243_01 | At2g43090 | 3-isopropylmalate dehydratase, small subunit; protein id: At2g43090.1                   | 0 | -0.87 | -1.07 | 1.5 | 0.75 | 5 Down early and sustained |
| A006251_01 | At2g30695 | expressed protein; protein id: At2g30695.1                                              | 0 | -0.82 | -1.24 | 1.9 | 0.17 | 5 Down early and sustained |
| A006284_01 | At2g45290 | putative transketolase precursor; protein id: At2g45290.1                               | 0 | -1.65 | -1.39 | 1.3 | 1.42 | 5 Down early and sustained |
| A006419_01 | At2g38730 | putative peptidyl-prolyl cis-trans isomerase; protein id: At2g38730.1                   | 0 | -0.80 | -1.34 | 1.3 | 1.42 | 5 Down early and sustained |
| A006637_01 | At2g31360 | delta 9 desaturase; protein id: At2g31360.1                                             | 0 | -0.96 | -1.14 | 1.1 | 5.44 | 5 Down early and sustained |
| A006949_01 | At2g45710 | putative ribosomal protein S27; protein id: At2g45710.1                                 | 0 | -0.59 | -1.03 | 1.4 | 0.75 | 5 Down early and sustained |
| A006959_01 | At2g22870 | putative nucleotide-binding protein; protein id: At2g22870.1                            | 0 | -0.86 | -1.31 | 1.4 | 1.11 | 5 Down early and sustained |
| A006972_01 | At2g32230 | hypothetical protein; protein id: At2g32230.1                                           | 0 | -1.08 | -1.15 | 1.4 | 0.75 | 5 Down early and sustained |
| A007023_01 | At2g14880 | expressed protein; protein id: At2g14880.1                                              | 0 | -0.61 | -1.05 | 1.4 | 1.11 | 5 Down early and sustained |
| A007051_01 | At2g27040 | Argonaute (AGO1)-like protein; protein id: At2g27040.1                                  | 0 | -1.49 | -2.50 | 1.7 | 0.27 | 5 Down early and sustained |
| A007218_01 | At5g15220 | ribosomal protein L27 - like; protein id: At5g15220.1                                   | 0 | -1.34 | -2.04 | 1.9 | 0.11 | 5 Down early and sustained |
| A007219_01 | At2g04030 | putative heat shock protein; protein id: At2g04030.1                                    | 0 | -1.21 | -1.10 | 1.7 | 0.36 | 5 Down early and sustained |
| A007246_01 | At2g34870 | expressed protein; protein id: At2g34870.1                                              | 0 | -1.54 | -1.69 | 2.4 | 0.05 | 5 Down early and sustained |
| A007273_01 | At2g15690 | expressed protein; protein id: At2g15690.1                                              | 0 | -0.66 | -1.04 | 1.1 | 5.44 | 5 Down early and sustained |
| A007305_01 | At2g28950 | expansin, putative; protein id: At2g28950.1                                             | 0 | -2.56 | -4.41 | 4.4 | 0.05 | 5 Down early and sustained |
| A007318_01 | At2g31390 | putative fructokinase; protein id: At2g31390.1                                          | 0 | -0.87 | -1.23 | 1.4 | 1.11 | 5 Down early and sustained |
| A007331_01 | At2g47590 | photolyase/blue-light receptor (PHR2); protein id: At2g47590.1                          | 0 | -0.92 | -1.01 | 1.6 | 0.36 | 5 Down early and sustained |
| A007338_01 | At2g29530 | expressed protein; protein id: At2g29530.1                                              | 0 | -1.08 | -1.66 | 3.1 | 0.05 | 5 Down early and sustained |
| A007342_01 | At2g17280 | unknown protein; protein id: At2g17280.1                                                | 0 | -1.14 | -2.00 | 3.0 | 0.05 | 5 Down early and sustained |
| A007564_01 | At2g26680 | expressed protein; protein id: At2g26680.1                                              | 0 | -1.23 | -1.10 | 1.2 | 2.11 | 5 Down early and sustained |
| A007622_01 | At2g18330 | putative AAA-type ATPase; protein id: At2g18330.1                                       | 0 | -1.42 | -1.78 | 2.1 | 0.05 | 5 Down early and sustained |
| A007757_01 | At2g34050 | expressed protein; protein id: At2g34050.1                                              | 0 | -0.86 | -1.05 | 1.2 | 2.11 | 5 Down early and sustained |
| A007776_01 | At2g37230 | unknown protein; protein id: At2g37230.1                                                | 0 | -0.98 | -1.39 | 1.6 | 0.41 | 5 Down early and sustained |
| A007804_01 | At2g40480 | hypothetical protein; protein id: At2g40480.1                                           | 0 | -0.82 | -1.45 | 2.0 | 0.08 | 5 Down early and sustained |
| A007929_01 | At2g44770 | expressed protein; protein id: At2g44770.1                                              | 0 | -1.01 | -1.43 | 2.1 | 0.05 | 5 Down early and sustained |
| A008005_01 | At2g27840 | unknown protein; protein id: At2g27840.1                                                | 0 | -0.88 | -1.40 | 1.6 | 0.41 | 5 Down early and sustained |
| A008198_01 | At2g26900 | putative Na <sup>+</sup> dependent ileal bile acid transporter; protein id: At2g26900.1 | 0 | -0.93 | -1.23 | 1.9 | 0.11 | 5 Down early and sustained |
| A008212_01 | At2g23930 | putative small nuclear ribonucleoprotein E; protein id: At2g23930.1                     | 0 | -1.12 | -1.28 | 1.7 | 0.27 | 5 Down early and sustained |
| A008269_01 | At2g27970 | CDK-subunit 2; protein id: At2g27970.1                                                  | 0 | -2.51 | -1.77 | 2.4 | 0.05 | 5 Down early and sustained |
| A008305_01 | At2g42840 | En/Spm-like transposon protein; protein id: At2g42840.1                                 | 0 | -2.15 | -3.20 | 2.3 | 0.05 | 5 Down early and sustained |
| A008350_01 | At2g04730 | hypothetical protein; protein id: At2g04730.1                                           | 0 | -0.78 | -1.27 | 1.2 | 2.11 | 5 Down early and sustained |
| A008386_01 | At2g05920 | subtilisin-like serine protease, putative; protein id: At2g05920.1                      | 0 | -0.79 | -1.03 | 1.5 | 0.60 | 5 Down early and sustained |
| A008583_01 | At2g17250 | hypothetical protein; protein id: At2g17250.1                                           | 0 | -0.72 | -1.24 | 1.7 | 0.36 | 5 Down early and sustained |
| A008587_01 | At2g28000 | putative rubisco subunit binding-protein alpha; protein id: At2g28000.1                 | 0 | -1.68 | -2.19 | 2.4 | 0.05 | 5 Down early and sustained |
| A008608_01 | At2g47470 | putative protein disulfide-isomerase; protein id: At2g47470.1                           | 0 | -1.31 | -1.68 | 2.4 | 0.05 | 5 Down early and sustained |
| A008645_01 | At2g43460 | 60S ribosomal protein L38; protein id: At2g43460.1                                      | 0 | -1.13 | -1.90 | 3.4 | 0.05 | 5 Down early and sustained |



|            |           |                                                    |   |       |       |     |      |                            |
|------------|-----------|----------------------------------------------------|---|-------|-------|-----|------|----------------------------|
| A008655_01 | At2g40800 | unknown protein; protein id: At2g40800.1           | 0 | -0.98 | -1.39 | 2.1 | 0.08 | 5 Down early and sustained |
| A008668_01 | At2g37860 | unknown protein; protein id: At2g37860.1           | 0 | -1.12 | -1.33 | 1.9 | 0.11 | 5 Down early and sustained |
| A008682_01 | At2g39670 | expressed protein; protein id: At2g39670.1         | 0 | -0.91 | -1.19 | 1.9 | 0.17 | 5 Down early and sustained |
| A008693_01 | At2g25110 | expressed protein; protein id: At2g25110.1         | 0 | -0.72 | -1.06 | 1.2 | 2.11 | 5 Down early and sustained |
| A008913_01 | At3g03920 | putative GAR1 protein; protein id: At3g03920.      | 0 | -0.70 | -1.22 | 2.1 | 0.05 | 5 Down early and sustained |
| A008926_01 | At3g51800 | putative nuclear DNA-binding protein G2p; prc      | 0 | -0.86 | -1.43 | 2.3 | 0.05 | 5 Down early and sustained |
| A008929_01 | At3g62300 | putative protein; protein id: At3g62300.1          | 0 | -0.73 | -1.14 | 1.5 | 0.47 | 5 Down early and sustained |
| A008944_01 | At3g22300 | putative 40S ribosomal protein S10; protein id     | 0 | -1.14 | -1.48 | 1.9 | 0.17 | 5 Down early and sustained |
| A008969_01 | At3g63130 | RAN GTPase activating protein 1 protein; prot      | 0 | -0.87 | -1.36 | 1.9 | 0.17 | 5 Down early and sustained |
| A009102_01 | At3g62530 | putative protein; protein id: At3g62530.1          | 0 | -0.87 | -1.11 | 2.0 | 0.08 | 5 Down early and sustained |
| A009189_01 | At3g28230 | unknown protein; protein id: At3g28230.1           | 0 | -0.67 | -1.09 | 1.2 | 2.11 | 5 Down early and sustained |
| A009196_01 | At3g55010 | phosphoribosylformylglycinamide cyclo-ligas        | 0 | -0.84 | -1.30 | 2.3 | 0.05 | 5 Down early and sustained |
| A009307_01 | At3g53890 | 40S ribosomal protein S21 homolog; protein ic      | 0 | -1.04 | -1.78 | 3.5 | 0.05 | 5 Down early and sustained |
| A009325_01 | At3g29320 | glucan phosphorylase, putative; protein id: At3    | 0 | -1.53 | -2.44 | 2.1 | 0.05 | 5 Down early and sustained |
| A009340_01 | At3g18760 | expressed protein; protein id: At3g18760.1         | 0 | -1.46 | -2.11 | 2.7 | 0.05 | 5 Down early and sustained |
| A009517_01 | At3g51670 | putative protein; protein id: At3g51670.1          | 0 | -0.65 | -1.11 | 1.6 | 0.41 | 5 Down early and sustained |
| A009543_01 | At3g16080 | putative ribosomal protein; protein id: At3g160    | 0 | -1.06 | -1.74 | 3.2 | 0.05 | 5 Down early and sustained |
| A009618_01 | At3g10610 | putative 40S ribosomal protein S17; protein id     | 0 | -1.47 | -2.48 | 1.7 | 0.27 | 5 Down early and sustained |
| A009676_01 | At3g07590 | putative small nuclear ribonucleoprotein (Sm-l     | 0 | -0.76 | -1.17 | 1.6 | 0.41 | 5 Down early and sustained |
| A009753_01 | At3g23830 | A.t. reversibly glycosylated polypeptide-1 (AtR    | 0 | -1.58 | -2.68 | 1.8 | 0.23 | 5 Down early and sustained |
| A009879_01 | At3g10090 | putative ribosomal protein S28; protein id: At3    | 0 | -0.74 | -1.08 | 1.6 | 0.41 | 5 Down early and sustained |
| A009911_01 | At3g15000 | expressed protein; protein id: At3g15000.1         | 0 | -1.45 | -1.34 | 2.5 | 0.05 | 5 Down early and sustained |
| A010051_01 | At3g62110 | polygalacturonase, putative; protein id: At3g62    | 0 | -1.50 | -1.98 | 2.6 | 0.05 | 5 Down early and sustained |
| A010300_01 | At3g47930 | L-galactono-1,4-lactone dehydrogenase - like       | 0 | -0.84 | -1.36 | 1.9 | 0.11 | 5 Down early and sustained |
| A010378_01 | At3g12145 | pseudogene, polygalacturonase inhibitor            | 0 | -2.48 | -3.42 | 3.1 | 0.05 | 5 Down early and sustained |
| A010441_01 | At3g09000 | expressed protein; protein id: At3g09000.1         | 0 | -0.66 | -1.15 | 1.1 | 5.44 | 5 Down early and sustained |
| A010460_01 | At3g15590 | DNA-binding protein, putative; protein id: At3g    | 0 | -0.66 | -1.04 | 1.5 | 0.47 | 5 Down early and sustained |
| A010467_01 | At3g19790 | hypothetical protein; protein id: At3g19790.1      | 0 | -0.77 | -1.04 | 1.6 | 0.41 | 5 Down early and sustained |
| A010517_01 | At3g06320 | putative 50S ribosomal protein L33; protein id:    | 0 | -1.77 | -2.42 | 2.6 | 0.05 | 5 Down early and sustained |
| A010559_01 | At3g56490 | protein kinase C inhibitor-like protein; protein i | 0 | -0.97 | -1.11 | 1.7 | 0.23 | 5 Down early and sustained |
| A010628_01 | At3g62840 | small nuclear ribonucleoprotein-like protein; p    | 0 | -0.57 | -1.01 | 1.6 | 0.36 | 5 Down early and sustained |
| A010629_01 | At3g23990 | mitochondrial chaperonin hsp60; protein id: At     | 0 | -1.10 | -1.47 | 2.4 | 0.05 | 5 Down early and sustained |
| A010660_01 | At3g20670 | histone H2A, putative; protein id: At3g20670.1     | 0 | -1.47 | -2.13 | 3.0 | 0.05 | 5 Down early and sustained |
| A010689_01 | At3g49670 | leucine-rich repeat transmembrane protein kir      | 0 | -1.19 | -1.81 | 1.9 | 0.11 | 5 Down early and sustained |
| A010709_01 | At3g56120 | putative protein; protein id: At3g56120.1          | 0 | -0.59 | -1.05 | 2.1 | 0.08 | 5 Down early and sustained |
| A010744_01 | At3g62360 | putative protein; protein id: At3g62360.1          | 0 | -1.10 | -0.84 | 1.8 | 0.23 | 5 Down early and sustained |
| A010819_01 | At3g15940 | hypothetical protein; protein id: At3g15940.1      | 0 | -1.10 | -1.27 | 1.1 | 5.44 | 5 Down early and sustained |
| A010926_01 | At3g61310 | putative DNA-binding protein; protein id: At3g6    | 0 | -0.81 | -1.00 | 1.4 | 0.75 | 5 Down early and sustained |
| A010943_01 | At3g52960 | peroxiredoxin - like protein; protein id: At3g52   | 0 | -0.95 | -1.16 | 1.3 | 1.11 | 5 Down early and sustained |
| A011078_01 | At3g17390 | putative s-adenosylmethionine synthetase; prc      | 0 | -1.20 | -1.12 | 1.8 | 0.19 | 5 Down early and sustained |
| A011148_01 | At3g04770 | putative 40S ribosomal protein; protein id: At3    | 0 | -0.99 | -1.41 | 2.4 | 0.05 | 5 Down early and sustained |
| A011344_01 | At3g09820 | putative adenosine kinase; protein id: At3g098     | 0 | -1.26 | -2.01 | 2.2 | 0.05 | 5 Down early and sustained |
| A011390_01 | At3g06530 | hypothetical protein; protein id: At3g06530.1      | 0 | -1.19 | -1.06 | 1.7 | 0.36 | 5 Down early and sustained |
| A011523_01 | At3g07200 | putative RING zinc finger protein; protein id: A   | 0 | -1.05 | -1.72 | 1.2 | 2.11 | 5 Down early and sustained |
| A011662_01 | At3g01980 | putative dehydrogenase; protein id: At3g0198       | 0 | -1.04 | -1.62 | 2.5 | 0.05 | 5 Down early and sustained |

|            |               |                                                   |   |       |       |     |      |                            |
|------------|---------------|---------------------------------------------------|---|-------|-------|-----|------|----------------------------|
| A011666_01 | At3g13180     | sun protein (fmu protein), putative; protein id:  | 0 | -0.94 | -1.20 | 1.9 | 0.17 | 5 Down early and sustained |
| A011671_01 | At3g04400     | ribosomal protein L17, putative; protein id: At3  | 0 | -1.02 | -1.29 | 1.7 | 0.23 | 5 Down early and sustained |
| A011678_01 | At3g54960     | protein disulfide-isomerase-like protein; protei  | 0 | -1.00 | -0.89 | 1.5 | 0.47 | 5 Down early and sustained |
| A011761_01 | At3g05000     | unknown protein; protein id: At3g05000.1          | 0 | -0.80 | -1.10 | 1.5 | 0.47 | 5 Down early and sustained |
| A011772_01 | At3g49240     | putative protein; protein id: At3g49240.1         | 0 | -1.05 | -1.54 | 2.6 | 0.05 | 5 Down early and sustained |
| A011861_01 | At3g54820     | aquaporin/MIP - like protein; protein id: At3g5-  | 0 | -1.72 | -2.56 | 3.2 | 0.05 | 5 Down early and sustained |
| A011872_01 | At3g61520     | putative protein; protein id: At3g61520.1         | 0 | -1.40 | -1.13 | 1.5 | 0.60 | 5 Down early and sustained |
| A012093_01 | At3g07230     | putative wound-induced basic protein; protein     | 0 | -1.02 | -1.01 | 1.5 | 0.47 | 5 Down early and sustained |
| A012115_01 | At3g18680     | uridylate kinase, putative; protein id: At3g1868  | 0 | -1.03 | -1.61 | 2.1 | 0.08 | 5 Down early and sustained |
| A012251_01 | At3g18240     | expressed protein; protein id: At3g18240.1        | 0 | -1.61 | -1.86 | 2.3 | 0.05 | 5 Down early and sustained |
| A012311_01 | At3g05590     | putative 60S ribosomal protein L18; protein id:   | 0 | -0.78 | -1.24 | 2.0 | 0.08 | 5 Down early and sustained |
| A012458_01 | At3g04120     | glyceraldehyde-3-phosphate dehydrogenase (        | 0 | -1.23 | -1.12 | 1.1 | 5.44 | 5 Down early and sustained |
| A012479_01 | At3g13230     | expressed protein; protein id: At3g13230.1        | 0 | -0.86 | -1.48 | 2.3 | 0.05 | 5 Down early and sustained |
| A012526_01 | At3g07770     | putative heat-shock protein; protein id: At3g07   | 0 | -1.47 | -1.28 | 2.9 | 0.05 | 5 Down early and sustained |
| A012640_01 | At3g54470     | similar to UMP synthase {Arabidopsis thaliana     | 0 | -1.06 | -1.62 | 1.8 | 0.19 | 5 Down early and sustained |
| A012752_01 | At3g54090     | fructokinase - like protein; protein id: At3g540: | 0 | -1.59 | -1.78 | 2.1 | 0.08 | 5 Down early and sustained |
| A012776_01 | At3g48610     | putative protein; protein id: At3g48610.1         | 0 | -0.88 | -1.28 | 1.2 | 2.11 | 5 Down early and sustained |
| A012862_01 | At4g26900     | glutamine amidotransferase/cyclase; protein id:   | 0 | -0.77 | -1.23 | 1.7 | 0.36 | 5 Down early and sustained |
| A013246_01 | At4g25890     | putative acidic ribosomal protein; protein id: A  | 0 | -1.05 | -1.80 | 2.9 | 0.05 | 5 Down early and sustained |
| A013271_01 | At4g31600     | putative protein; protein id: At4g31600.1         | 0 | -1.02 | -1.15 | 1.5 | 0.60 | 5 Down early and sustained |
| A013416_01 | At4g37910     | glycine hydroxymethyltransferase-like protein     | 0 | -1.24 | -1.54 | 2.6 | 0.05 | 5 Down early and sustained |
| A013554_01 | not annotated | Chr4 C/7628038-7628107                            | 0 | -2.07 | -3.49 | 2.5 | 0.05 | 5 Down early and sustained |
| A013555_01 | At4g15200     | expressed protein; protein id: At4g15200.1        | 0 | -1.91 | -2.87 | 1.5 | 0.47 | 5 Down early and sustained |
| A013561_01 | At4g15640     | hypothetical protein; protein id: At4g15640.1     | 0 | -1.52 | -2.29 | 2.3 | 0.05 | 5 Down early and sustained |
| A013625_01 | At4g36420     | ribosomal protein; protein id: At4g36420.1        | 0 | -0.72 | -1.21 | 2.8 | 0.05 | 5 Down early and sustained |
| A013633_01 | At4g36660     | hypothetical protein; protein id: At4g36660.1     | 0 | -0.82 | -1.37 | 1.7 | 0.27 | 5 Down early and sustained |
| A013637_01 | At4g36940     | hypothetical protein; protein id: At4g36940.1     | 0 | -0.93 | -1.36 | 1.4 | 1.11 | 5 Down early and sustained |
| A013669_01 | At4g24190     | HSP90-like protein; protein id: At4g24190.1       | 0 | -1.22 | -1.70 | 2.6 | 0.05 | 5 Down early and sustained |
| A013755_01 | At4g33030     | sulfolipid biosynthesis protein SQD1; protein id: | 0 | -1.40 | -1.32 | 2.1 | 0.05 | 5 Down early and sustained |
| A013774_01 | At4g34200     | phosphoglycerate dehydrogenase - like protei      | 0 | -1.48 | -1.89 | 2.9 | 0.05 | 5 Down early and sustained |
| A013831_01 | At4g29520     | putative protein; protein id: At4g29520.1         | 0 | -1.80 | -2.12 | 1.7 | 0.27 | 5 Down early and sustained |
| A014040_01 | At4g11320     | cysteine proteinase; protein id: At4g11320.1      | 0 | -3.89 | -4.70 | 2.5 | 0.05 | 5 Down early and sustained |
| A014086_01 | At4g27900     | putative protein; protein id: At4g27900.1         | 0 | -0.97 | -1.29 | 2.8 | 0.05 | 5 Down early and sustained |
| A014146_01 | At4g39170     | SEC14 - like protein; protein id: At4g39170.1     | 0 | -1.06 | -1.06 | 1.4 | 0.75 | 5 Down early and sustained |
| A014182_01 | At4g11820     | hydroxymethylglutaryl-CoA synthase; protein id:   | 0 | -0.93 | -1.43 | 2.2 | 0.05 | 5 Down early and sustained |
| A014247_01 | At4g10270     | probable wound-induced protein; protein id: A     | 0 | -2.47 | -2.20 | 2.0 | 0.08 | 5 Down early and sustained |
| A014275_01 | At4g12890     | putative protein; protein id: At4g12890.1         | 0 | -3.59 | -4.95 | 2.2 | 0.05 | 5 Down early and sustained |
| A014577_01 | At4g02930     | mitochondrial elongation factor Tu; protein id:   | 0 | -1.75 | -2.60 | 4.7 | 0.05 | 5 Down early and sustained |
| A014634_01 | At4g39730     | putative protein; protein id: At4g39730.1         | 0 | -1.57 | -1.73 | 2.2 | 0.05 | 5 Down early and sustained |
| A014706_01 | At4g15770     | hypothetical protein; protein id: At4g15770.1     | 0 | -0.93 | -1.15 | 2.2 | 0.05 | 5 Down early and sustained |
| A014716_01 | At4g13940     | adenosylhomocysteinase; protein id: At4g139-      | 0 | -0.90 | -1.28 | 1.9 | 0.17 | 5 Down early and sustained |
| A014721_01 | At4g11010     | nucleoside diphosphate kinase 3 (ndpk3); pro      | 0 | -1.11 | -1.54 | 2.6 | 0.05 | 5 Down early and sustained |
| A014799_01 | At4g02290     | glycosyl hydrolase family 9; protein id: At4g02   | 0 | -3.01 | -3.87 | 2.2 | 0.05 | 5 Down early and sustained |
| A015144_01 | At4g26780     | grpE like protein; protein id: At4g26780.1        | 0 | -1.80 | -1.37 | 1.8 | 0.19 | 5 Down early and sustained |
| A015235_01 | At4g25630     | fibrillarlin 2 (AtFib2); protein id: At4g25630.1  | 0 | -1.71 | -2.43 | 1.8 | 0.19 | 5 Down early and sustained |

|            |           |                                                                                                                    |   |       |       |     |      |                            |
|------------|-----------|--------------------------------------------------------------------------------------------------------------------|---|-------|-------|-----|------|----------------------------|
| A015240_01 | At4g30220 | snRNP Sm protein F - like; protein id: At4g30220.1                                                                 | 0 | -1.30 | -1.54 | 2.5 | 0.05 | 5 Down early and sustained |
| A015444_01 | At4g33680 | putative protein; protein id: At4g33680.1                                                                          | 0 | -0.96 | -1.09 | 1.7 | 0.27 | 5 Down early and sustained |
| A015472_01 | At4g36680 | salt-inducible like protein; protein id: At4g36680.1                                                               | 0 | -1.22 | -1.91 | 2.0 | 0.08 | 5 Down early and sustained |
| A015475_01 | At4g16630 | DEAD/DEAH box RNA helicase, putative; protein id: At4g16630.1                                                      | 0 | -0.80 | -1.27 | 1.6 | 0.36 | 5 Down early and sustained |
| A015484_01 | At4g09320 | nucleoside-diphosphate kinase; protein id: At4g09320.1                                                             | 0 | -0.94 | -1.39 | 1.9 | 0.17 | 5 Down early and sustained |
| A015492_01 | At4g36360 | glycosyl hydrolase family 35 (beta-galactosidase-like); protein id: At4g36360.1                                    | 0 | -1.72 | -2.49 | 1.8 | 0.23 | 5 Down early and sustained |
| A015585_01 | At5g08040 | putative protein; protein id: At5g08040.1                                                                          | 0 | -1.05 | -1.28 | 1.9 | 0.11 | 5 Down early and sustained |
| A015586_01 | At5g40350 | myb family transcription factor; protein id: At5g40350.1                                                           | 0 | -1.01 | -1.24 | 1.6 | 0.36 | 5 Down early and sustained |
| A015793_01 | At5g23420 | expressed protein; protein id: At5g23420.1                                                                         | 0 | -2.19 | -2.51 | 2.4 | 0.05 | 5 Down early and sustained |
| A015860_01 | At5g44630 | terpene synthase/cyclase family; protein id: At5g44630.1                                                           | 0 | -3.01 | -4.31 | 6.8 | 0.05 | 5 Down early and sustained |
| A015895_01 | At5g48580 | FKBP-type peptidyl-prolyl cis-trans isomerase                                                                      | 0 | -1.02 | -1.53 | 2.3 | 0.05 | 5 Down early and sustained |
| A015997_01 | At5g67260 | cyclin D3;2; protein id: At5g67260.1                                                                               | 0 | -0.80 | -1.25 | 2.0 | 0.08 | 5 Down early and sustained |
| A016012_01 | At5g46290 | 3-oxoacyl-(acyl-carrier-protein) synthase I pre-biotin carboxyl carrier protein 1 (BCCP1); protein id: At5g46290.1 | 0 | -0.99 | -1.42 | 2.0 | 0.08 | 5 Down early and sustained |
| A016062_01 | At5g16390 | histone H2B like protein (emb CAA69025.1); protein id: At5g16390.1                                                 | 0 | -0.74 | -1.10 | 1.5 | 0.47 | 5 Down early and sustained |
| A016083_01 | At5g22880 | putative protein phosphatase; protein id: At5g22880.1                                                              | 0 | -2.57 | -3.02 | 3.2 | 0.05 | 5 Down early and sustained |
| A016120_01 | At5g10480 | putative protein phosphatase; protein id: At5g10480.1                                                              | 0 | -0.98 | -1.27 | 2.2 | 0.05 | 5 Down early and sustained |
| A016447_01 | At5g52540 | putative protein; protein id: At5g52540.1                                                                          | 0 | -1.17 | -1.37 | 1.9 | 0.11 | 5 Down early and sustained |
| A016484_01 | At5g16060 | hypothetical protein; protein id: At5g16060.1                                                                      | 0 | -0.99 | -1.70 | 2.1 | 0.08 | 5 Down early and sustained |
| A016625_01 | At5g56940 | 30S ribosomal protein S16; protein id: At5g56940.1                                                                 | 0 | -0.88 | -1.09 | 1.7 | 0.27 | 5 Down early and sustained |
| A016736_01 | At5g12080 | putative protein; protein id: At5g12080.1                                                                          | 0 | -1.56 | -1.50 | 1.9 | 0.11 | 5 Down early and sustained |
| A016907_01 | At5g23580 | calcium-dependent protein kinase (pir  S7119); protein id: At5g23580.1                                             | 0 | -1.29 | -1.65 | 1.9 | 0.11 | 5 Down early and sustained |
| A016914_01 | At5g02240 | putative protein; protein id: At5g02240.1                                                                          | 0 | -1.37 | -1.56 | 2.2 | 0.05 | 5 Down early and sustained |
| A016922_01 | At5g59850 | cytoplasmic ribosomal protein S15a - like; protein id: At5g59850.1                                                 | 0 | -1.31 | -2.28 | 3.9 | 0.05 | 5 Down early and sustained |
| A016929_01 | At5g42920 | putative protein; protein id: At5g42920.1                                                                          | 0 | -0.88 | -1.12 | 2.1 | 0.08 | 5 Down early and sustained |
| A016950_01 | At5g61790 | calnexin - like protein; protein id: At5g61790.1                                                                   | 0 | -0.93 | -1.24 | 2.0 | 0.08 | 5 Down early and sustained |
| A016979_01 | At5g23250 | succinyl-CoA synthetase, alpha subunit; protein id: At5g23250.1                                                    | 0 | -1.15 | -1.45 | 2.4 | 0.05 | 5 Down early and sustained |
| A017042_01 | At5g64860 | glycosyl hydrolase family 77 (4-alpha-glucanase-like); protein id: At5g64860.1                                     | 0 | -1.15 | -1.66 | 1.4 | 1.11 | 5 Down early and sustained |
| A017331_01 | At5g12110 | elongation factor 1B alpha-subunit (emb CAB60000.1); protein id: At5g12110.1                                       | 0 | -0.72 | -1.11 | 1.9 | 0.11 | 5 Down early and sustained |
| A017361_01 | At5g47870 | putative protein; protein id: At5g47870.1                                                                          | 0 | -1.33 | -1.02 | 1.2 | 2.11 | 5 Down early and sustained |
| A017380_01 | At5g40480 | nuclear pore protein -like; protein id: At5g40480.1                                                                | 0 | -1.85 | -2.15 | 1.8 | 0.19 | 5 Down early and sustained |
| A017513_01 | At5g13930 | chalcone synthase; protein id: At5g13930.1                                                                         | 0 | -3.19 | -2.98 | 2.2 | 0.05 | 5 Down early and sustained |
| A017645_01 | At5g59870 | histone H2A - like protein; protein id: At5g59870.1                                                                | 0 | -2.63 | -2.89 | 2.4 | 0.05 | 5 Down early and sustained |
| A017667_01 | At5g58930 | putative protein; protein id: At5g58930.1                                                                          | 0 | -1.10 | -1.67 | 1.9 | 0.11 | 5 Down early and sustained |
| A017742_01 | At5g22650 | histone deacetylase-like protein; protein id: At5g22650.1                                                          | 0 | -0.68 | -1.20 | 2.2 | 0.05 | 5 Down early and sustained |
| A017764_01 | At5g61810 | peroxisomal Ca-dependent solute carrier - like protein; protein id: At5g61810.1                                    | 0 | -0.86 | -1.20 | 1.5 | 0.47 | 5 Down early and sustained |
| A017860_01 | At5g65310 | homeobox-leucine zipper protein ATHB-5 (HCA1); protein id: At5g65310.1                                             | 0 | -1.84 | -2.38 | 2.6 | 0.05 | 5 Down early and sustained |
| A017897_01 | At5g64670 | putative protein; protein id: At5g64670.1                                                                          | 0 | -1.05 | -1.46 | 1.9 | 0.11 | 5 Down early and sustained |
| A017915_01 | At5g62270 | putative protein; protein id: At5g62270.1                                                                          | 0 | -1.25 | -2.01 | 1.6 | 0.41 | 5 Down early and sustained |
| A017933_01 | At5g66470 | GTP-binding protein-like; protein id: At5g66470.1                                                                  | 0 | -0.97 | -1.17 | 1.4 | 0.75 | 5 Down early and sustained |
| A017942_01 | At5g22580 | expressed protein; protein id: At5g22580.1                                                                         | 0 | -2.86 | -4.15 | 5.9 | 0.05 | 5 Down early and sustained |
| A017971_01 | At5g50810 | small zinc finger-like protein; protein id: At5g50810.1                                                            | 0 | -1.22 | -1.58 | 2.5 | 0.05 | 5 Down early and sustained |
| A018000_01 | At5g08300 | succinyl-CoA-ligase alpha subunit; protein id: At5g08300.1                                                         | 0 | -0.86 | -1.10 | 1.9 | 0.08 | 5 Down early and sustained |
| A018006_01 | At5g24780 | vegetative storage protein Vsp1; protein id: At5g24780.1                                                           | 0 | -2.04 | -3.45 | 2.4 | 0.05 | 5 Down early and sustained |
| A018049_01 | At5g64580 | putative protein; protein id: At5g64580.1                                                                          | 0 | -1.23 | -0.93 | 1.5 | 0.60 | 5 Down early and sustained |
| A018060_01 | At5g52840 | expressed protein; protein id: At5g52840.1                                                                         | 0 | -0.79 | -1.08 | 1.7 | 0.27 | 5 Down early and sustained |

|            |           |                                                   |   |       |       |     |      |                            |
|------------|-----------|---------------------------------------------------|---|-------|-------|-----|------|----------------------------|
| A018237_01 | At5g11890 | putative protein; protein id: At5g11890.1         | 0 | -1.15 | -1.84 | 1.8 | 0.23 | 5 Down early and sustained |
| A018355_01 | At5g67150 | anthranilate N-hydroxycinnamoyl/benzoyltrans      | 0 | -1.22 | -1.23 | 1.3 | 1.42 | 5 Down early and sustained |
| A018395_01 | At5g40770 | prohibitin (gb AAC49691.1); protein id: At5g40    | 0 | -1.09 | -1.45 | 2.2 | 0.05 | 5 Down early and sustained |
| A018428_01 | At5g59480 | putative ripening-related protein - like; protein | 0 | -1.16 | -1.82 | 2.6 | 0.05 | 5 Down early and sustained |
| A018638_01 | At5g46220 | putative protein; protein id: At5g46220.1         | 0 | -1.34 | -2.05 | 3.0 | 0.05 | 5 Down early and sustained |
| A018694_01 | At5g22550 | putative protein; protein id: At5g22550.1         | 0 | -0.89 | -1.43 | 1.2 | 2.11 | 5 Down early and sustained |
| A018803_01 | At5g65430 | 14-3-3 protein GF14 kappa (grf8); protein id: /   | 0 | -1.80 | -1.32 | 2.6 | 0.05 | 5 Down early and sustained |
| A018844_01 | At5g43940 | alcohol dehydrogenase (EC 1.1.1.1) class III (    | 0 | -0.73 | -1.18 | 2.2 | 0.05 | 5 Down early and sustained |
| A018909_01 | At5g64140 | 40S ribosomal protein S28 (sp P34789); prote      | 0 | -1.17 | -2.04 | 4.9 | 0.05 | 5 Down early and sustained |
| A019032_01 | At5g66530 | apospory-associated protein C-like; protein id:   | 0 | -1.10 | -1.17 | 1.2 | 2.11 | 5 Down early and sustained |
| A019041_01 | xxxx      | b/t putative protein; protein id: At5g14310.1 a   | 0 | -0.68 | -1.02 | 1.2 | 2.11 | 5 Down early and sustained |
| A019127_01 | At5g61130 | glycosyl hydrolase family 17; protein id: At5g6   | 0 | -1.59 | -1.87 | 2.2 | 0.05 | 5 Down early and sustained |
| A019447_01 | At1g68990 | DNA-directed RNA polymerase; protein id: At       | 0 | -0.80 | -1.31 | 1.6 | 0.47 | 5 Down early and sustained |
| A019469_01 | At4g34870 | peptidylprolyl isomerase (cyclophilin); protein i | 0 | -0.84 | -1.46 | 2.5 | 0.05 | 5 Down early and sustained |
| A019491_01 | At3g59970 | methylenetetrahydrofolate reductase MTHFR         | 0 | -1.26 | -1.75 | 1.8 | 0.19 | 5 Down early and sustained |
| A019496_01 | At1g09210 | putative calcium-binding protein, calreticulin; p | 0 | -1.59 | -1.85 | 2.4 | 0.05 | 5 Down early and sustained |
| A019562_01 | At4g31840 | putative protein; protein id: At4g31840.1         | 0 | -2.91 | -3.41 | 2.7 | 0.05 | 5 Down early and sustained |
| A019566_01 | At4g12600 | ribosomal protein L7Ae -like; protein id: At4g1   | 0 | -1.44 | -2.21 | 3.9 | 0.05 | 5 Down early and sustained |
| A019602_01 | At5g01620 | putative protein; protein id: At5g01620.1         | 0 | -1.00 | -1.67 | 1.3 | 1.11 | 5 Down early and sustained |
| A019630_01 | At3g16780 | putative ribosomal protein; protein id: At3g167   | 0 | -0.92 | -1.37 | 2.0 | 0.08 | 5 Down early and sustained |
| A019638_01 | At3g25220 | immunophilin (FKBP15-1); protein id: At3g252      | 0 | -1.10 | -1.22 | 2.0 | 0.08 | 5 Down early and sustained |
| A019640_01 | At5g41060 | putative protein; protein id: At5g41060.1         | 0 | -1.19 | -1.77 | 1.4 | 1.11 | 5 Down early and sustained |
| A019642_01 | At5g48880 | 3-keto-acyl-CoA thiolase 2 (gb AAC17877.1);       | 0 | -2.29 | -1.53 | 2.0 | 0.08 | 5 Down early and sustained |
| A019666_01 | At3g21190 | expressed protein; protein id: At3g21190.1        | 0 | -1.00 | -1.42 | 1.3 | 1.42 | 5 Down early and sustained |
| A019680_01 | At5g24420 | 6-phosphogluconolactonase-like protein; prote     | 0 | -2.31 | -3.54 | 3.4 | 0.05 | 5 Down early and sustained |
| A019771_01 | At2g22670 | auxin-regulated protein (IAA8); protein id: At2g  | 0 | -1.02 | -1.51 | 2.3 | 0.05 | 5 Down early and sustained |
| A019813_01 | At1g33040 | expressed protein; protein id: At1g33040.1        | 0 | -1.21 | -1.38 | 2.0 | 0.08 | 5 Down early and sustained |
| A019866_01 | At2g37020 | translin-like protein; protein id: At2g37020.1    | 0 | -1.45 | -1.47 | 1.5 | 0.47 | 5 Down early and sustained |
| A019952_01 | At1g55210 | disease resistance response protein-related/ c    | 0 | -1.04 | -1.17 | 1.9 | 0.11 | 5 Down early and sustained |
| A020001_01 | At1g55490 | rubisco subunit binding-protein beta subunit; p   | 0 | -1.07 | -1.89 | 2.1 | 0.05 | 5 Down early and sustained |
| A020048_01 | At2g19520 | putative WD-40 repeat protein, MSI4; protein i    | 0 | -1.06 | -1.04 | 2.1 | 0.08 | 5 Down early and sustained |
| A020050_01 | At3g53900 | uracil phosphoribosyltransferase-like protein; j  | 0 | -2.31 | -2.68 | 2.0 | 0.08 | 5 Down early and sustained |
| A020054_01 | At3g56090 | putative protein; protein id: At3g56090.1         | 0 | -0.99 | -1.17 | 2.0 | 0.08 | 5 Down early and sustained |
| A020216_01 | At1g09630 | GTP-binding protein, putative; protein id: At1g   | 0 | -1.19 | -1.06 | 1.3 | 1.42 | 5 Down early and sustained |
| A020217_01 | At2g28790 | putative thaumatin; protein id: At2g28790.1       | 0 | -1.99 | -2.80 | 3.3 | 0.05 | 5 Down early and sustained |
| A020265_01 | At4g13950 | expressed protein; protein id: At4g13950.1        | 0 | -1.02 | -1.34 | 1.4 | 1.11 | 5 Down early and sustained |
| A020382_01 | At1g71220 | putative UDP-glucose:glycoprotein glucosyltra     | 0 | -1.14 | -1.01 | 1.5 | 0.60 | 5 Down early and sustained |
| A020383_01 | At2g45030 | mitochondrial elongation factor, putative; prote  | 0 | -1.02 | -0.83 | 1.2 | 2.11 | 5 Down early and sustained |
| A020385_01 | At2g21160 | putative signal sequence receptor, alpha subu     | 0 | -0.70 | -1.15 | 1.7 | 0.27 | 5 Down early and sustained |
| A020406_01 | At2g04390 | 40S ribosomal protein S17; protein id: At2g04     | 0 | -1.00 | -1.72 | 2.9 | 0.05 | 5 Down early and sustained |
| A020410_01 | At2g28470 | glycosyl hydrolase family 35 (beta-galactosida    | 0 | -1.85 | -2.70 | 3.9 | 0.05 | 5 Down early and sustained |
| A020481_01 | At3g18940 | expressed protein; protein id: At3g18940.1        | 0 | -0.90 | -1.10 | 1.8 | 0.23 | 5 Down early and sustained |
| A020516_01 | At5g20720 | chloroplast Cpn21 protein; protein id: At5g207    | 0 | -1.19 | -1.69 | 1.8 | 0.23 | 5 Down early and sustained |
| A020524_01 | At3g02040 | expressed protein; protein id: At3g02040.1        | 0 | -1.64 | -1.29 | 2.0 | 0.08 | 5 Down early and sustained |
| A020556_01 | At3g22840 | early light-induced protein; protein id: At3g228  | 0 | -1.51 | -1.66 | 1.7 | 0.36 | 5 Down early and sustained |

|            |           |                                                  |   |       |       |     |      |                            |
|------------|-----------|--------------------------------------------------|---|-------|-------|-----|------|----------------------------|
| A020594_01 | At4g23690 | disease resistance response protein family/ di   | 0 | -1.51 | -1.99 | 1.8 | 0.19 | 5 Down early and sustained |
| A020601_01 | At1g56210 | copper chaperone (CCH)-related; protein id: A    | 0 | -0.70 | -1.01 | 1.2 | 2.11 | 5 Down early and sustained |
| A020653_01 | At4g25340 | putative protein; protein id: At4g25340.1        | 0 | -1.05 | -0.92 | 1.3 | 1.42 | 5 Down early and sustained |
| A020659_01 | At3g03630 | O-acetylserine (thiol) lyase; protein id: At3g03 | 0 | -1.06 | -1.83 | 1.4 | 1.11 | 5 Down early and sustained |
| A020727_01 | At1g12000 | putative pyrophosphate-fructose-6-phosphate      | 0 | -1.46 | -1.99 | 2.9 | 0.05 | 5 Down early and sustained |
| A020730_01 | At3g18000 | methyltransferase, putative; protein id: At3g18  | 0 | -2.58 | -3.23 | 3.2 | 0.05 | 5 Down early and sustained |
| A020732_01 | At4g17190 | farnesyl pyrophosphate synthetase 2 (FPS2) (     | 0 | -1.32 | -2.13 | 2.6 | 0.05 | 5 Down early and sustained |
| A020762_01 | At1g49760 | polyadenylate-binding protein (PABP), putative   | 0 | -0.77 | -1.14 | 1.3 | 1.42 | 5 Down early and sustained |
| A020843_01 | At4g30930 | WRKY family transcription factor; protein id: A  | 0 | -0.99 | -1.68 | 3.2 | 0.05 | 5 Down early and sustained |
| A020883_01 | At2g39930 | putative isoamylase; protein id: At2g39930.1     | 0 | -0.70 | -1.09 | 1.2 | 2.11 | 5 Down early and sustained |
| A020905_01 | At5g08260 | serine-type carboxypeptidase II-like protein; p  | 0 | -2.00 | -1.98 | 2.9 | 0.05 | 5 Down early and sustained |
| A020916_01 | At1g11840 | glyoxalase I, putative (lactoylglutathione lyase | 0 | -0.87 | -1.16 | 1.5 | 0.47 | 5 Down early and sustained |
| A020970_01 | At4g29680 | nucleotide pyrophosphatase - like protein; pro   | 0 | -1.11 | -1.45 | 2.2 | 0.05 | 5 Down early and sustained |
| A021010_01 | At1g09590 | putative 60S ribosomal protein L21; protein id:  | 0 | -1.25 | -2.02 | 3.5 | 0.05 | 5 Down early and sustained |
| A021021_01 | At5g28540 | luminal binding protein; protein id: At5g28540.  | 0 | -1.30 | -1.91 | 1.9 | 0.08 | 5 Down early and sustained |
| A021046_01 | At2g34480 | 60S ribosomal protein L18A; protein id: At2g3    | 0 | -0.72 | -1.25 | 1.7 | 0.27 | 5 Down early and sustained |
| A021053_01 | At5g24770 | vegetative storage protein Vsp2; protein id: At  | 0 | -0.94 | -1.34 | 1.1 | 5.44 | 5 Down early and sustained |
| A021059_01 | At1g53240 | mitochondrial NAD-dependent malate dehydr        | 0 | -1.13 | -1.71 | 2.8 | 0.05 | 5 Down early and sustained |
| A021062_01 | At3g53750 | actin (ACT3); protein id: At3g53750.1            | 0 | -1.11 | -1.31 | 1.9 | 0.08 | 5 Down early and sustained |
| A021213_01 | At1g07820 | histone H4; protein id: At1g07820.1              | 0 | -1.16 | -1.11 | 2.3 | 0.05 | 5 Down early and sustained |
| A021227_01 | At3g58200 | putative protein; protein id: At3g58200.1        | 0 | -1.19 | -1.28 | 1.1 | 5.44 | 5 Down early and sustained |
| A021299_01 | At4g29760 | putative protein; protein id: At4g29760.1        | 0 | -1.17 | -2.04 | 3.3 | 0.05 | 5 Down early and sustained |
| A021338_01 | At4g30330 | small nuclear ribonucleoprotein homolog; prot    | 0 | -1.32 | -2.12 | 2.7 | 0.05 | 5 Down early and sustained |
| A021542_01 | At1g54690 | histone H2A, putative; protein id: At1g54690.1   | 0 | -1.09 | -0.75 | 1.3 | 1.11 | 5 Down early and sustained |
| A021551_01 | At1g04470 | unknown protein; protein id: At1g04470.1         | 0 | -1.06 | -1.28 | 1.5 | 0.60 | 5 Down early and sustained |
| A021565_01 | At3g46560 | small zinc finger-like protein TIM9; protein id: | 0 | -0.99 | -1.67 | 3.2 | 0.05 | 5 Down early and sustained |
| A021585_01 | At2g18990 | putative ATP binding protein; protein id: At2g1  | 0 | -1.16 | -1.67 | 2.4 | 0.05 | 5 Down early and sustained |
| A021613_01 | At2g28740 | histone H4; protein id: At2g28740.1              | 0 | -1.62 | -1.84 | 2.0 | 0.08 | 5 Down early and sustained |
| A021696_01 | At1g29250 | expressed protein; protein id: At1g29250.1       | 0 | -0.98 | -1.58 | 3.2 | 0.05 | 5 Down early and sustained |
| A021726_01 | At1g07070 | ribosomal protein, putative; protein id: At1g07  | 0 | -1.08 | -1.66 | 2.1 | 0.05 | 5 Down early and sustained |
| A021739_01 | At3g11500 | putative small nuclear ribonucleoprotein polyp   | 0 | -0.94 | -1.14 | 1.4 | 0.75 | 5 Down early and sustained |
| A021794_01 | At2g02500 | putative sugar nucleotide phosphorylase; prot    | 0 | -1.24 | -1.64 | 1.7 | 0.27 | 5 Down early and sustained |
| A021829_01 | At5g10390 | histone H3 - like protein; protein id: At5g1039  | 0 | -1.96 | -1.49 | 3.1 | 0.05 | 5 Down early and sustained |
| A021891_01 | At4g14320 | ribosomal protein; protein id: At4g14320.1       | 0 | -0.88 | -1.34 | 2.5 | 0.05 | 5 Down early and sustained |
| A021908_01 | At1g09200 | expressed protein; protein id: At1g09200.1       | 0 | -1.98 | -1.95 | 2.3 | 0.05 | 5 Down early and sustained |
| A021930_01 | At3g46320 | F12M12.3; pseudogene, putative histone H4-I      | 0 | -1.79 | -1.90 | 3.2 | 0.05 | 5 Down early and sustained |
| A021932_01 | At5g03850 | ribosomal protein S28- like; protein id: At5g03  | 0 | -0.72 | -1.20 | 2.0 | 0.08 | 5 Down early and sustained |
| A021938_01 | At1g26880 | 60s ribosomal protein L34; protein id: At1g268   | 0 | -0.92 | -1.54 | 2.8 | 0.05 | 5 Down early and sustained |
| A021941_01 | At3g27360 | histone H3, putative; protein id: At3g27360.1    | 0 | -2.10 | -3.39 | 4.1 | 0.05 | 5 Down early and sustained |
| A021949_01 | At1g14850 | nucleoporin, putative; protein id: At1g14850.1   | 0 | -0.64 | -1.14 | 1.3 | 1.42 | 5 Down early and sustained |
| A021955_01 | At1g22270 | expressed protein; protein id: At1g22270.1       | 0 | -0.68 | -1.05 | 1.7 | 0.27 | 5 Down early and sustained |
| A021966_01 | At3g43810 | calmodulin 7; protein id: At3g43810.1            | 0 | -1.03 | -1.48 | 1.8 | 0.19 | 5 Down early and sustained |
| A021998_01 | At2g02100 | plant defensin protein, putative (PDF2.2); prot  | 0 | -1.87 | -3.15 | 4.3 | 0.05 | 5 Down early and sustained |
| A022009_01 | At3g23390 | putative ribosomal protein; protein id: At3g233  | 0 | -0.95 | -1.65 | 3.3 | 0.05 | 5 Down early and sustained |
| A022047_01 | At1g67430 | ribosomal protein, putative; protein id: At1g67  | 0 | -1.11 | -1.90 | 3.4 | 0.05 | 5 Down early and sustained |

|            |           |                                                    |   |       |       |     |      |                            |
|------------|-----------|----------------------------------------------------|---|-------|-------|-----|------|----------------------------|
| A022282_01 | At4g28360 | expressed protein; protein id: At4g28360.1         | 0 | -1.10 | -1.53 | 1.8 | 0.17 | 5 Down early and sustained |
| A022486_01 | At4g11120 | putative translation elongation factor ts; protei  | 0 | -0.75 | -1.10 | 1.2 | 2.11 | 5 Down early and sustained |
| A022635_01 | At4g37220 | cold acclimation protein homolog; protein id: A    | 0 | -0.79 | -1.32 | 1.6 | 0.41 | 5 Down early and sustained |
| A022862_01 | At5g55915 | nucleolar protein-like; protein id: At5g55915.1    | 0 | -1.02 | -1.44 | 1.7 | 0.36 | 5 Down early and sustained |
| A022882_01 | At5g58710 | cyclophilin ROC7; protein id: At5g58710.1          | 0 | -0.98 | -1.27 | 2.0 | 0.08 | 5 Down early and sustained |
| A022999_01 | At5g63650 | serine/threonine-protein kinase; protein id: At5   | 0 | -1.38 | -2.17 | 1.5 | 0.60 | 5 Down early and sustained |
| A023130_01 | At5g51080 | putative protein; protein id: At5g51080.1          | 0 | -0.76 | -1.29 | 2.5 | 0.05 | 5 Down early and sustained |
| A023158_01 | At5g15670 | putative protein; protein id: At5g15670.1          | 0 | -1.19 | -1.22 | 1.4 | 0.75 | 5 Down early and sustained |
| A023297_01 | At1g73110 | rubisco activase, putative; protein id: At1g731    | 0 | -1.11 | -1.35 | 2.4 | 0.05 | 5 Down early and sustained |
| A023363_01 | At2g32920 | putative protein disulfide isomerase; protein id   | 0 | -0.89 | -1.14 | 2.0 | 0.08 | 5 Down early and sustained |
| A023389_01 | At2g45860 | hypothetical protein; protein id: At2g45860.1      | 0 | -0.81 | -1.01 | 1.6 | 0.41 | 5 Down early and sustained |
| A023629_01 | At2g31670 | unknown protein; protein id: At2g31670.1           | 0 | -0.79 | -1.12 | 1.2 | 2.11 | 5 Down early and sustained |
| A024112_01 | At2g05220 | 40S ribosomal protein S17; protein id: At2g05      | 0 | -0.92 | -1.31 | 1.8 | 0.19 | 5 Down early and sustained |
| A024291_01 | At1g14320 | tumor suppressor, putative; protein id: At1g14     | 0 | -0.97 | -1.55 | 2.1 | 0.05 | 5 Down early and sustained |
| A024306_01 | At1g71070 | N-acetylglucosaminyltransferase family (Core       | 0 | -0.98 | -1.30 | 2.2 | 0.05 | 5 Down early and sustained |
| A024318_01 | At3g48930 | cytosolic ribosomal protein S11; protein id: At3   | 0 | -1.19 | -2.02 | 3.2 | 0.05 | 5 Down early and sustained |
| A024346_01 | At1g16190 | hypothetical protein; protein id: At1g16190.1      | 0 | -0.78 | -1.09 | 1.4 | 0.75 | 5 Down early and sustained |
| A024354_01 | At2g39330 | putative myrosinase-binding protein; protein ic    | 0 | -2.40 | -3.94 | 2.2 | 0.05 | 5 Down early and sustained |
| A024398_01 | At1g53310 | phosphoenolpyruvate carboxylase 1, putative;       | 0 | -0.88 | -1.14 | 1.4 | 0.75 | 5 Down early and sustained |
| A024453_01 | At1g03860 | putative prohibitin 2; protein id: At1g03860.1     | 0 | -0.92 | -1.12 | 2.4 | 0.05 | 5 Down early and sustained |
| A024474_01 | At5g66510 | ferripyochelin-binding protein-like; protein id: A | 0 | -1.23 | -1.26 | 2.0 | 0.08 | 5 Down early and sustained |
| A024569_01 | At5g15650 | reversibly glycosylated polypeptide-3; protein i   | 0 | -1.22 | -1.39 | 1.9 | 0.11 | 5 Down early and sustained |
| A024585_01 | At3g52590 | ubiquitin extension protein 1 (UBQ1); protein i    | 0 | -0.96 | -1.66 | 2.5 | 0.05 | 5 Down early and sustained |
| A024635_01 | At1g79560 | FtsH protease, putative; protein id: At1g79560     | 0 | -1.28 | -1.84 | 2.1 | 0.08 | 5 Down early and sustained |
| A024652_01 | At1g27450 | adenine phosphoribosyltransferase 1, APRT;         | 0 | -1.10 | -1.37 | 2.1 | 0.08 | 5 Down early and sustained |
| A024673_01 | At3g59760 | cysteine synthase; protein id: At3g59760.1         | 0 | -1.87 | -1.70 | 2.6 | 0.05 | 5 Down early and sustained |
| A024724_01 | At5g60140 | putative protein; protein id: At5g60140.1          | 0 | -0.69 | -1.19 | 1.5 | 0.47 | 5 Down early and sustained |
| A024785_01 | At1g48610 | regulatory protein HAL3B; protein id: At1g486      | 0 | -1.50 | -2.07 | 2.5 | 0.05 | 5 Down early and sustained |
| A024856_01 | At1g52030 | myrosinase binding protein, putative; protein ic   | 0 | -3.03 | -3.89 | 2.5 | 0.05 | 5 Down early and sustained |
| A024863_01 | At5g56000 | heat shock protein (emb CAA72514.1); protei        | 0 | -0.86 | -1.40 | 1.5 | 0.60 | 5 Down early and sustained |
| A024874_01 | At4g28510 | prohibitin-like protein; protein id: At4g28510.1   | 0 | -0.85 | -1.37 | 1.2 | 2.11 | 5 Down early and sustained |
| A024913_01 | At4g32390 | putative protein; protein id: At4g32390.1          | 0 | -0.79 | -1.18 | 2.1 | 0.08 | 5 Down early and sustained |
| A025190_01 | At5g38540 | myrosinase binding protein-like; similar to jasr   | 0 | -2.50 | -3.87 | 3.2 | 0.05 | 5 Down early and sustained |
| A025368_01 | At1g52030 | myrosinase binding protein, putative; protein ic   | 0 | -3.17 | -4.97 | 3.4 | 0.05 | 5 Down early and sustained |
| A025397_01 | At2g23010 | putative serine carboxypeptidase I; protein id:    | 0 | -1.30 | -2.16 | 1.9 | 0.11 | 5 Down early and sustained |
| A025502_01 | At1g64760 | glycosyl hydrolase family 17; protein id: At1g6    | 0 | -1.13 | -1.85 | 1.9 | 0.11 | 5 Down early and sustained |
| A025542_01 | At1g29310 | flower pigmentation protein ATAN11; protein i      | 0 | -0.97 | -1.31 | 1.4 | 0.75 | 5 Down early and sustained |
| A025645_01 | At3g11250 | 60S acidic ribosomal protein, putative; protein    | 0 | -0.89 | -1.36 | 2.6 | 0.05 | 5 Down early and sustained |
| A025728_01 | At1g04900 | expressed protein; protein id: At1g04900.1         | 0 | -1.37 | -1.72 | 1.8 | 0.23 | 5 Down early and sustained |
| A025730_01 | At5g18620 | chromatin remodelling complex ATPase chair         | 0 | -1.07 | -0.84 | 1.6 | 0.41 | 5 Down early and sustained |
| A025776_01 | At5g39320 | UDP-glucose dehydrogenase-like protein; pro        | 0 | -1.35 | -1.39 | 1.7 | 0.36 | 5 Down early and sustained |
| A025870_01 | At4g14960 | tubulin alpha-6 chain (TUA6); protein id: At4g     | 0 | -0.87 | -1.06 | 1.8 | 0.19 | 5 Down early and sustained |
| A025929_01 | At3g49120 | peroxidase, putative; protein id: At3g49120.1      | 0 | -1.15 | -1.40 | 1.3 | 1.42 | 5 Down early and sustained |
| A025958_01 | At1g50010 | tubulin alpha-2/alpha-4 chain, putative; protei    | 0 | -1.31 | -1.21 | 2.6 | 0.05 | 5 Down early and sustained |
| A025984_01 | At1g20010 | beta tubulin 1, putative; protein id: At1g20010.   | 0 | -1.28 | -1.97 | 1.8 | 0.23 | 5 Down early and sustained |

|            |           |                                                        |   |       |       |     |      |                            |
|------------|-----------|--------------------------------------------------------|---|-------|-------|-----|------|----------------------------|
| A025990_01 | At5g56030 | heat shock protein 81-2 (HSP81-2) (sp P5573            | 0 | -1.00 | -1.40 | 1.7 | 0.27 | 5 Down early and sustained |
| A026089_01 | At2g37660 | expressed protein; protein id: At2g37660.1             | 0 | -0.93 | -1.55 | 1.4 | 0.75 | 5 Down early and sustained |
| A002042_01 | At1g49410 | expressed protein; protein id: At1g49410.1             | 0 | -1.05 | -0.83 | 1.2 | 2.11 | 5 Down early and sustained |
| A010702_01 | At3g16050 | putative ethylene-inducible protein; protein id:       | 0 | -1.14 | -1.96 | 2.1 | 0.08 | 5 Down early and sustained |
| A012243_01 | At3g03600 | putative ribosomal protein S2; protein id: At3g        | 0 | -1.05 | -1.46 | 1.5 | 0.47 | 5 Down early and sustained |
| A020391_01 | At4g32570 | putative protein; protein id: At4g32570.1              | 0 | -0.98 | -1.01 | 1.4 | 0.75 | 5 Down early and sustained |
| A021618_01 | At2g02130 | plant defensin protein, putative (PDF2.3); prot        | 0 | -1.40 | -0.91 | 1.5 | 0.60 | 5 Down early and sustained |
| A021825_01 | At5g66230 | putative protein; protein id: At5g66230.1              | 0 | -2.95 | -2.01 | 2.9 | 0.05 | 5 Down early and sustained |
| A000015_01 | At1g17560 | ribosomal protein, putative; protein id: At1g17:       | 0 | -1.60 | -2.41 | 2.4 | 0.05 | 5 Down early and sustained |
| A011147_01 | At3g16290 | FtsH protease, putative; protein id: At3g16290         | 0 | -0.72 | -1.08 | 1.5 | 0.47 | 5 Down early and sustained |
| A015551_01 | At5g04210 | RRM-containing protein; protein id: At5g04210          | 0 | -1.13 | -1.57 | 1.7 | 0.27 | 5 Down early and sustained |
| A018765_01 | At5g60470 | putative zinc finger protein; protein id: At5g604      | 0 | -0.84 | -1.12 | 1.5 | 0.60 | 5 Down early and sustained |
| A022274_01 | At4g20020 | DAG-like protein; protein id: At4g20020.1              | 0 | -0.79 | -1.16 | 1.2 | 2.11 | 5 Down early and sustained |
| A000029_01 | At1g78580 | trehalose-6-phosphate synthase, putative; pro          | 0 | -0.60 | -1.24 | 1.3 | 1.11 | 6 Down progressive         |
| A000253_01 | At1g20330 | sterol-C-methyltransferase; protein id: At1g20         | 0 | -0.24 | -1.27 | 2.4 | 0.05 | 6 Down progressive         |
| A000970_01 | At5g10330 | putative histidinol-phosphate aminotransferas          | 0 | -0.48 | -1.01 | 1.8 | 0.23 | 6 Down progressive         |
| A000992_01 | At1g14900 | linker histone protein, putative; protein id: At1g     | 0 | -0.52 | -1.36 | 2.5 | 0.05 | 6 Down progressive         |
| A001012_01 | At1g27360 | putative squamosa-promoter binding protein 2           | 0 | -0.38 | -1.07 | 1.2 | 2.11 | 6 Down progressive         |
| A001135_01 | At1g35720 | Ca <sup>2+</sup> -dependent membrane-binding protein a | 0 | -1.09 | -2.77 | 3.9 | 0.05 | 6 Down progressive         |
| A001165_01 | At1g13280 | allene oxide cyclase, putative; protein id: At1g       | 0 | -0.55 | -1.87 | 2.4 | 0.05 | 6 Down progressive         |
| A001241_01 | At1g64880 | expressed protein; protein id: At1g64880.1             | 0 | -0.86 | -2.05 | 1.4 | 0.75 | 6 Down progressive         |
| A001340_01 | At1g33140 | ribosomal protein L9, putative; protein id: At1g       | 0 | -0.81 | -1.89 | 1.9 | 0.08 | 6 Down progressive         |
| A001355_01 | At1g30795 | expressed protein; protein id: At1g30795.1             | 0 | -1.58 | -3.57 | 5.6 | 0.05 | 6 Down progressive         |
| A001374_01 | At1g25330 | helix-loop-helix protein homolog, putative; pro        | 0 | -1.46 | -4.48 | 5.4 | 0.05 | 6 Down progressive         |
| A001380_01 | At1g31850 | unknown protein; protein id: At1g31850.1               | 0 | -0.50 | -1.73 | 3.1 | 0.05 | 6 Down progressive         |
| A001387_01 | At1g01300 | chloroplast nucleoid DNA binding protein, puta         | 0 | -0.82 | -2.28 | 1.5 | 0.60 | 6 Down progressive         |
| A001420_01 | At1g27370 | putative squamosa-promoter binding protein 2           | 0 | -0.67 | -1.51 | 1.8 | 0.17 | 6 Down progressive         |
| A001429_01 | At1g70710 | glycosyl hydrolase family 9 (endo-1,4-beta-glu         | 0 | -0.49 | -2.49 | 2.1 | 0.08 | 6 Down progressive         |
| A001566_01 | At1g29900 | carbamoylphosphate synthetase, putative; pro           | 0 | -0.51 | -1.35 | 1.8 | 0.19 | 6 Down progressive         |
| A001645_01 | At1g33410 | unknown protein; protein id: At1g33410.1               | 0 | -0.53 | -1.20 | 2.0 | 0.08 | 6 Down progressive         |
| A001745_01 | At1g78210 | hypothetical protein; protein id: At1g78210.1          | 0 | -1.03 | -2.12 | 1.5 | 0.60 | 6 Down progressive         |
| A001758_01 | At1g53000 | CMP-KDO synthetase, putative; protein id: At           | 0 | -0.51 | -1.29 | 1.6 | 0.41 | 6 Down progressive         |
| A001936_01 | At1g20850 | cysteine proteinase XCP2; protein id: At1g208          | 0 | -0.36 | -1.38 | 1.8 | 0.23 | 6 Down progressive         |
| A001967_01 | At1g49430 | acyl CoA synthetase, putative; protein id: At1g        | 0 | -0.59 | -1.54 | 2.4 | 0.05 | 6 Down progressive         |
| A001988_01 | At1g27950 | lipid transfer protein, putative; protein id: At1g;    | 0 | -0.60 | -1.65 | 2.7 | 0.05 | 6 Down progressive         |
| A002062_01 | At1g69830 | putative alpha-amylase; protein id: At1g69830          | 0 | -0.99 | -1.85 | 1.3 | 1.11 | 6 Down progressive         |
| A002080_01 | At1g41880 | ribosomal protein; protein id: At1g41880.1             | 0 | -1.08 | -2.15 | 3.2 | 0.05 | 6 Down progressive         |
| A002086_01 | At1g69620 | 60S ribosomal protein L34, putative; protein ic        | 0 | -0.69 | -1.83 | 2.6 | 0.05 | 6 Down progressive         |
| A002146_01 | At1g24360 | putative 3-oxoacyl (acyl-carrier protein) reduct       | 0 | -0.38 | -1.42 | 1.8 | 0.19 | 6 Down progressive         |
| A002647_01 | At1g12330 | hypothetical protein; protein id: At1g12330.1          | 0 | -0.65 | -2.03 | 3.5 | 0.05 | 6 Down progressive         |
| A002787_01 | At1g52300 | 60S ribosomal protein L37, putative; protein ic        | 0 | -0.62 | -1.94 | 2.7 | 0.05 | 6 Down progressive         |
| A002842_01 | At1g16340 | putative 3-deoxy-D-manno-2-octulosonate-8-ph           | 0 | -0.54 | -1.49 | 2.0 | 0.08 | 6 Down progressive         |
| A003154_01 | At1g61870 | expressed protein; protein id: At1g61870.1             | 0 | -1.17 | -2.33 | 5.3 | 0.05 | 6 Down progressive         |
| A003181_01 | At1g72090 | expressed protein; protein id: At1g72090.1             | 0 | -0.47 | -1.15 | 1.5 | 0.60 | 6 Down progressive         |
| A003294_01 | At1g19570 | dehydroascorbate reductase, putative; protein          | 0 | -0.67 | -1.35 | 2.4 | 0.05 | 6 Down progressive         |

|            |           |                                                   |   |       |       |     |      |                    |
|------------|-----------|---------------------------------------------------|---|-------|-------|-----|------|--------------------|
| A003359_01 | At1g30720 | FAD-linked oxidoreductase family; protein id: .   | 0 | -0.77 | -1.45 | 1.2 | 5.44 | 6 Down progressive |
| A003360_01 | At1g70600 | 60S ribosomal protein L27A; protein id: At1g7     | 0 | -0.54 | -1.82 | 2.2 | 0.05 | 6 Down progressive |
| A003389_01 | At1g68560 | glycosyl hydrolase family 31 (alpha-xylosidase    | 0 | -0.47 | -2.42 | 2.2 | 0.05 | 6 Down progressive |
| A003486_01 | At1g76710 | unknown protein; protein id: At1g76710.1          | 0 | -0.27 | -1.23 | 2.5 | 0.05 | 6 Down progressive |
| A003617_01 | At1g32930 | Avr9 elicitor response protein, putative; protei  | 0 | -0.46 | -1.24 | 1.7 | 0.23 | 6 Down progressive |
| A003637_01 | At1g16920 | GTP binding protein, putative; protein id: At1g   | 0 | -0.89 | -2.46 | 3.1 | 0.05 | 6 Down progressive |
| A003647_01 | At1g72970 | expressed protein; protein id: At1g72970.1        | 0 | -1.79 | -3.75 | 2.6 | 0.05 | 6 Down progressive |
| A003660_01 | At1g07770 | ribosomal protein S15; protein id: At1g07770.:    | 0 | -0.64 | -1.78 | 3.1 | 0.05 | 6 Down progressive |
| A003694_01 | At1g17880 | transcription factor, putative; protein id: At1g1 | 0 | -0.82 | -1.62 | 2.9 | 0.05 | 6 Down progressive |
| A004242_01 | At1g34030 | ribosomal protein S18, putative; protein id: At1  | 0 | -0.70 | -1.38 | 1.6 | 0.41 | 6 Down progressive |
| A004284_01 | At1g63290 | putative D-ribulose-5-phosphate-3-epimerase       | 0 | -1.09 | -2.84 | 3.5 | 0.05 | 6 Down progressive |
| A004497_01 | At1g26650 | expressed protein; protein id: At1g26650.1        | 0 | -0.54 | -1.21 | 1.8 | 0.17 | 6 Down progressive |
| A004526_01 | At1g64790 | hypothetical protein; protein id: At1g64790.1     | 0 | -0.63 | -1.21 | 1.6 | 0.41 | 6 Down progressive |
| A004652_01 | At1g67830 | F12A21.4; protein id: At1g67830.1                 | 0 | -0.47 | -1.84 | 1.2 | 2.11 | 6 Down progressive |
| A004684_01 | At1g08830 | copper/zinc superoxidase dismutase (CSD1);        | 0 | -0.94 | -2.71 | 3.9 | 0.05 | 6 Down progressive |
| A004739_01 | At1g14460 | hypothetical protein; protein id: At1g14460.1     | 0 | -0.39 | -1.17 | 1.4 | 1.11 | 6 Down progressive |
| A004805_01 | At1g72370 | putative 40S ribosomal protein SA (laminin rex    | 0 | -0.44 | -1.43 | 1.5 | 0.60 | 6 Down progressive |
| A004820_01 | At1g18080 | G-protein beta family; protein id: At1g18080.1    | 0 | -0.66 | -1.68 | 1.6 | 0.36 | 6 Down progressive |
| A005005_01 | At5g20290 | putative protein; protein id: At5g20290.1         | 0 | -0.71 | -1.87 | 2.3 | 0.05 | 6 Down progressive |
| A005012_01 | At4g15920 | cytochrome c oxidoreductase like protein; pro     | 0 | -1.11 | -2.18 | 1.3 | 1.11 | 6 Down progressive |
| A005160_01 | At4g21960 | peroxidase, putative; protein id: At4g21960.1     | 0 | -0.24 | -1.09 | 1.5 | 0.60 | 6 Down progressive |
| A005389_01 | At5g27450 | mevalonate kinase; protein id: At5g27450.1        | 0 | -0.26 | -1.28 | 1.1 | 5.44 | 6 Down progressive |
| A005394_01 | At5g62700 | tubulin beta-2/beta-3 chain (sp P29512); prote    | 0 | -0.60 | -1.83 | 2.6 | 0.05 | 6 Down progressive |
| A005576_01 | At1g75710 | unknown protein; protein id: At1g75710.1          | 0 | -0.82 | -3.19 | 5.3 | 0.05 | 6 Down progressive |
| A005590_01 | At4g16155 | expressed protein; protein id: At4g16155.1        | 0 | -0.80 | -1.98 | 2.6 | 0.05 | 6 Down progressive |
| A005615_01 | At1g32540 | zinc-finger protein, putative; protein id: At1g32 | 0 | -0.32 | -1.40 | 2.7 | 0.05 | 6 Down progressive |
| A005746_01 | At3g49010 | 60S ribosomal protein L13, BBC1 protein; pro      | 0 | -1.01 | -1.91 | 2.4 | 0.05 | 6 Down progressive |
| A005771_01 | At5g27850 | putative 60S ribosomal protein                    | 0 | -0.84 | -1.88 | 3.1 | 0.05 | 6 Down progressive |
| A006070_01 | At2g26330 | putative receptor-like protein kinase, ERECTA     | 0 | -0.80 | -2.17 | 1.4 | 0.75 | 6 Down progressive |
| A006090_01 | At2g02850 | putative basic blue protein (plantacyanin); pro   | 0 | -1.89 | -5.16 | 1.8 | 0.19 | 6 Down progressive |
| A006100_01 | At2g33370 | 60S ribosomal protein L23; protein id: At2g33:    | 0 | -0.92 | -2.32 | 3.9 | 0.05 | 6 Down progressive |
| A006202_01 | At2g28080 | putative glucosyltransferase; protein id: At2g2   | 0 | -0.84 | -1.79 | 2.8 | 0.05 | 6 Down progressive |
| A006233_01 | At2g19940 | putative N-acetyl-gamma-glutamyl-phosphate        | 0 | -0.74 | -1.59 | 1.7 | 0.27 | 6 Down progressive |
| A006239_01 | At2g01720 | putative ribophorin I; protein id: At2g01720.1    | 0 | -0.38 | -1.17 | 1.2 | 2.11 | 6 Down progressive |
| A006288_01 | At2g03420 | hypothetical protein; protein id: At2g03420.1     | 0 | -0.42 | -1.01 | 1.2 | 2.11 | 6 Down progressive |
| A006400_01 | At2g32650 | expressed protein; protein id: At2g32650.1        | 0 | -0.47 | -1.03 | 1.2 | 5.44 | 6 Down progressive |
| A006579_01 | At2g22080 | En/Spm-like transposon protein; protein id: At:   | 0 | -0.23 | -1.01 | 2.2 | 0.05 | 6 Down progressive |
| A006716_01 | At2g17230 | expressed protein; protein id: At2g17230.1        | 0 | -0.83 | -2.49 | 3.1 | 0.05 | 6 Down progressive |
| A006726_01 | At2g20340 | putative tyrosine decarboxylase; protein id: At:  | 0 | -0.76 | -1.45 | 1.4 | 0.75 | 6 Down progressive |
| A006781_01 | At2g35780 | putative serine carboxypeptidase II; protein id:  | 0 | -0.35 | -1.22 | 1.2 | 2.11 | 6 Down progressive |
| A006847_01 | At2g29980 | omega-3 fatty acid desaturase, endoplasmic r      | 0 | -1.23 | -2.73 | 2.6 | 0.05 | 6 Down progressive |
| A006928_01 | At2g34350 | nodulin-like protein; protein id: At2g34350.1     | 0 | -0.61 | -1.49 | 1.5 | 0.60 | 6 Down progressive |
| A006988_01 | At2g47940 | DegP2 protease; protein id: At2g47940.1           | 0 | -0.43 | -1.03 | 1.4 | 0.75 | 6 Down progressive |
| A007061_01 | At2g37120 | expressed protein; protein id: At2g37120.1        | 0 | -0.85 | -2.05 | 2.7 | 0.05 | 6 Down progressive |
| A007290_01 | At2g01250 | putative ribosomal protein L7; protein id: At2g   | 0 | -0.70 | -1.78 | 2.1 | 0.08 | 6 Down progressive |



|            |           |                                                   |   |       |       |     |      |                    |
|------------|-----------|---------------------------------------------------|---|-------|-------|-----|------|--------------------|
| A007300_01 | At2g44060 | similar to late embryogenesis abundant protei     | 0 | -0.48 | -1.49 | 2.0 | 0.08 | 6 Down progressive |
| A007333_01 | At2g29540 | DNA-directed RNA polymerase 14 kDa subun          | 0 | -0.88 | -1.66 | 1.7 | 0.27 | 6 Down progressive |
| A007373_01 | At2g44650 | chloroplast chaperonin 10; protein id: At2g446    | 0 | -0.43 | -1.05 | 1.5 | 0.60 | 6 Down progressive |
| A007475_01 | At2g05790 | glycosyl hydrolase family 17; protein id: At2g0   | 0 | -0.79 | -3.99 | 2.5 | 0.05 | 6 Down progressive |
| A007627_01 | At2g42220 | rhodanese-like domain protein; protein id: At2    | 0 | -0.77 | -1.95 | 1.8 | 0.17 | 6 Down progressive |
| A007733_01 | At2g31410 | expressed protein; protein id: At2g31410.1        | 0 | -0.21 | -1.05 | 1.3 | 1.11 | 6 Down progressive |
| A007744_01 | At2g27810 | putative membrane transporter; protein id: At2    | 0 | -0.46 | -1.28 | 1.1 | 5.44 | 6 Down progressive |
| A007805_01 | At2g31170 | putative cysteinyl-tRNA synthetase; protein id:   | 0 | -0.57 | -1.11 | 1.2 | 2.11 | 6 Down progressive |
| A007815_01 | At2g43550 | putative trypsin inhibitor; protein id: At2g43550 | 0 | -1.41 | -2.81 | 2.7 | 0.05 | 6 Down progressive |
| A007816_01 | At2g43530 | putative trypsin inhibitor; protein id: At2g43530 | 0 | -0.91 | -2.35 | 2.6 | 0.05 | 6 Down progressive |
| A007949_01 | At2g24090 | putative chloroplast ribosomal protein L35; prc   | 0 | -0.76 | -1.51 | 2.0 | 0.08 | 6 Down progressive |
| A007975_01 | At2g22420 | putative peroxidase; protein id: At2g22420.1      | 0 | -0.20 | -1.03 | 1.4 | 1.11 | 6 Down progressive |
| A008017_01 | At2g33800 | 30S ribosomal protein S5; protein id: At2g338     | 0 | -0.40 | -1.15 | 1.3 | 1.11 | 6 Down progressive |
| A008055_01 | At2g02320 | hypothetical protein; protein id: At2g02320.1     | 0 | -1.23 | -3.23 | 4.0 | 0.05 | 6 Down progressive |
| A008056_01 | At2g38540 | putative nonspecific lipid-transfer protein; prot | 0 | -0.83 | -3.28 | 2.9 | 0.05 | 6 Down progressive |
| A008060_01 | At2g05210 | hypothetical protein; protein id: At2g05210.1     | 0 | -0.48 | -1.48 | 2.7 | 0.05 | 6 Down progressive |
| A008131_01 | At2g03980 | putative GDSL-motif lipase/hydrolase; protein     | 0 | -0.73 | -1.46 | 1.3 | 1.42 | 6 Down progressive |
| A008143_01 | At2g27590 | expressed protein; protein id: At2g27590.1        | 0 | -0.44 | -1.18 | 1.8 | 0.17 | 6 Down progressive |
| A008254_01 | At2g34810 | FAD-linked oxidoreductase family; protein id: .   | 0 | -0.84 | -2.06 | 1.3 | 1.42 | 6 Down progressive |
| A008432_01 | At2g11910 | expressed protein; protein id: At2g11910.1        | 0 | -0.46 | -1.04 | 2.2 | 0.05 | 6 Down progressive |
| A008445_01 | At2g43030 | 50S ribosomal protein L3; protein id: At2g43030   | 0 | -0.62 | -1.26 | 1.7 | 0.27 | 6 Down progressive |
| A008452_01 | At2g39390 | 60S ribosomal protein L35; protein id: At2g393    | 0 | -0.84 | -1.80 | 2.8 | 0.05 | 6 Down progressive |
| A008548_01 | At2g39770 | GDP-mannose pyrophosphorylase; protein id:        | 0 | -0.41 | -1.20 | 1.9 | 0.17 | 6 Down progressive |
| A008549_01 | At2g05990 | enoyl-ACP reductase (enr-A); protein id: At2g0    | 0 | -1.20 | -2.55 | 3.9 | 0.05 | 6 Down progressive |
| A008621_01 | At2g18390 | putative ADP-ribosylation factor; protein id: At  | 0 | -0.59 | -1.17 | 1.9 | 0.11 | 6 Down progressive |
| A008652_01 | At2g46470 | OXA1 protein (OXA1p), putative; protein id: At    | 0 | -0.64 | -1.57 | 2.3 | 0.05 | 6 Down progressive |
| A008663_01 | At2g41840 | 40S ribosomal protein S2; protein id: At2g418     | 0 | -0.30 | -1.44 | 2.5 | 0.05 | 6 Down progressive |
| A008686_01 | At2g45440 | putative dihydrodipicolinate synthase; protein i  | 0 | -0.32 | -1.25 | 1.7 | 0.27 | 6 Down progressive |
| A008727_01 | At2g41650 | unknown protein; protein id: At2g41650.1          | 0 | -0.95 | -2.49 | 5.1 | 0.05 | 6 Down progressive |
| A008731_01 | At2g28900 | putative membrane channel protein; protein id     | 0 | -0.60 | -1.88 | 2.5 | 0.05 | 6 Down progressive |
| A008855_01 | At2g42740 | 60S ribosomal protein L11B; protein id: At2g4     | 0 | -0.46 | -1.19 | 1.9 | 0.11 | 6 Down progressive |
| A008857_01 | At2g32690 | unknown protein; protein id: At2g32690.1          | 0 | -1.07 | -3.13 | 3.3 | 0.05 | 6 Down progressive |
| A008883_01 | At3g51010 | expressed protein; protein id: At3g51010.1        | 0 | -0.80 | -1.56 | 2.8 | 0.05 | 6 Down progressive |
| A008904_01 | At3g62870 | 60S RIBOSOMAL PROTEIN L7A protein; prot           | 0 | -0.71 | -2.03 | 2.4 | 0.05 | 6 Down progressive |
| A008920_01 | At3g17160 | unknown protein; protein id: At3g17160.1          | 0 | -1.16 | -2.23 | 3.0 | 0.05 | 6 Down progressive |
| A008934_01 | At3g20050 | t-complex polypeptide 1 homologue; protein ic     | 0 | -0.53 | -1.01 | 1.3 | 1.42 | 6 Down progressive |
| A008937_01 | At3g53020 | 60S ribosomal protein - like; protein id: At3g53  | 0 | -0.53 | -1.25 | 2.3 | 0.05 | 6 Down progressive |
| A009016_01 | At3g22310 | putative RNA helicase; protein id: At3g22310.     | 0 | -0.55 | -1.09 | 2.4 | 0.05 | 6 Down progressive |
| A009031_01 | At3g56340 | 40S ribosomal protein S26 homologue; protein ic   | 0 | -0.67 | -1.60 | 2.9 | 0.05 | 6 Down progressive |
| A009087_01 | At3g45140 | lipoxygenase AtLOX2; protein id: At3g45140.1      | 0 | -0.85 | -2.16 | 2.5 | 0.05 | 6 Down progressive |
| A009147_01 | At3g18130 | protein kinase C-receptor/G-protein, putative;    | 0 | -1.04 | -2.57 | 4.2 | 0.05 | 6 Down progressive |
| A009256_01 | At3g04840 | putative 40S ribosomal protein S3A (S phase       | 0 | -0.88 | -1.85 | 2.5 | 0.05 | 6 Down progressive |
| A009369_01 | At3g46210 | putative protein; protein id: At3g46210.1         | 0 | -0.22 | -1.05 | 1.4 | 1.11 | 6 Down progressive |
| A009480_01 | At3g18560 | expressed protein; protein id: At3g18560.1        | 0 | -0.57 | -1.14 | 1.6 | 0.41 | 6 Down progressive |
| A009491_01 | At3g30370 | hypothetical protein; protein id: At3g30370.1     | 0 | -0.51 | -1.30 | 1.5 | 0.47 | 6 Down progressive |

|            |           |                                                    |   |       |       |     |      |                    |
|------------|-----------|----------------------------------------------------|---|-------|-------|-----|------|--------------------|
| A009524_01 | At3g11210 | expressed protein; protein id: At3g11210.1         | 0 | -0.52 | -1.39 | 1.2 | 5.44 | 6 Down progressive |
| A009566_01 | At3g55360 | synaptic glycoprotein SC2-like protein; protein    | 0 | -0.56 | -1.33 | 1.9 | 0.11 | 6 Down progressive |
| A009568_01 | At3g15640 | putative cytochrome c oxidase subunit Vb; prc      | 0 | -0.45 | -1.41 | 1.2 | 2.11 | 6 Down progressive |
| A010190_01 | At3g55420 | putative protein; protein id: At3g55420.1          | 0 | -0.59 | -1.41 | 1.2 | 2.11 | 6 Down progressive |
| A010296_01 | At3g19400 | cysteine proteinase; protein id: At3g19400.1       | 0 | -0.75 | -1.48 | 1.7 | 0.27 | 6 Down progressive |
| A010320_01 | At3g12390 | nascent polypeptide associated complex alph        | 0 | -0.84 | -1.84 | 3.0 | 0.05 | 6 Down progressive |
| A010365_01 | At3g06700 | ribosomal protein L29, putative; protein id: At3   | 0 | -0.68 | -1.43 | 2.4 | 0.05 | 6 Down progressive |
| A010369_01 | At3g44890 | RP19 gene for chloroplast ribosomal protein C      | 0 | -0.59 | -1.27 | 1.9 | 0.11 | 6 Down progressive |
| A010393_01 | At3g54400 | nucleoid DNA-binding - like protein; protein id:   | 0 | -1.32 | -3.14 | 4.5 | 0.05 | 6 Down progressive |
| A010506_01 | At3g54920 | pectate lyase - like protein; protein id: At3g549  | 0 | -0.34 | -1.71 | 1.7 | 0.23 | 6 Down progressive |
| A010526_01 | At3g55005 | expressed protein; protein id: At3g55005.1         | 0 | -0.36 | -1.11 | 1.8 | 0.19 | 6 Down progressive |
| A010548_01 | xxxx      | b/t glycosyl transferase, putative; protein id: At | 0 | -0.36 | -1.40 | 1.9 | 0.08 | 6 Down progressive |
| A010679_01 | At3g57560 | acetylglutamate kinase-like protein; protein id:   | 0 | -0.78 | -1.46 | 2.3 | 0.05 | 6 Down progressive |
| A010733_01 | At3g27740 | carbamoyl phosphate synthetase small subun         | 0 | -0.86 | -2.14 | 2.7 | 0.05 | 6 Down progressive |
| A010750_01 | At3g49220 | pectinesterase - like protein; protein id: At3g49  | 0 | -1.04 | -1.96 | 2.7 | 0.05 | 6 Down progressive |
| A011304_01 | At3g21110 | phosphoribosyamidoimidazole-succinocarbox          | 0 | -0.50 | -1.07 | 2.3 | 0.05 | 6 Down progressive |
| A011342_01 | At3g05060 | putative SAR DNA-binding protein-1; protein id:    | 0 | -0.86 | -1.62 | 1.6 | 0.41 | 6 Down progressive |
| A011396_01 | At3g08740 | putative elongation factor P (EF-P); protein id:   | 0 | -0.60 | -1.49 | 2.0 | 0.08 | 6 Down progressive |
| A011419_01 | At3g05180 | putative nodulin; protein id: At3g05180.1          | 0 | -0.58 | -1.10 | 1.3 | 1.42 | 6 Down progressive |
| A011479_01 | At3g03980 | putative short-chain type dehydrogenase/redu       | 0 | -0.42 | -1.08 | 1.6 | 0.47 | 6 Down progressive |
| A011548_01 | At3g04290 | putative GDSL-motif lipase/acylhydrolase; pro      | 0 | -2.38 | -4.84 | 1.8 | 0.19 | 6 Down progressive |
| A011650_01 | At3g09200 | putative 60S acidic ribosomal protein P0; prot     | 0 | -0.57 | -1.24 | 1.9 | 0.17 | 6 Down progressive |
| A011673_01 | At3g09440 | heat-shock protein (At-hsc70-3); protein id: At    | 0 | -0.37 | -1.38 | 1.2 | 2.11 | 6 Down progressive |
| A011689_01 | At3g50060 | myb DNA-binding protein (MYB77); protein id:       | 0 | -0.37 | -1.29 | 1.6 | 0.47 | 6 Down progressive |
| A011717_01 | At3g11830 | putative T-complex protein 1, ETA subunit; pr      | 0 | -0.19 | -1.00 | 1.4 | 0.75 | 6 Down progressive |
| A011814_01 | At3g52930 | fructose bisphosphate aldolase - like protein; j   | 0 | -0.44 | -1.47 | 1.5 | 0.47 | 6 Down progressive |
| A011822_01 | At3g58610 | ketol-acid reductoisomerase; protein id: At3g5     | 0 | -0.52 | -1.57 | 1.5 | 0.60 | 6 Down progressive |
| A011858_01 | At3g54080 | putative protein; protein id: At3g54080.1          | 0 | -0.68 | -1.32 | 2.2 | 0.05 | 6 Down progressive |
| A011935_01 | At3g62460 | putative protein; protein id: At3g62460.1          | 0 | -0.55 | -1.07 | 1.3 | 1.11 | 6 Down progressive |
| A011949_01 | At3g57150 | putative protein; protein id: At3g57150.1          | 0 | -0.76 | -1.86 | 1.8 | 0.19 | 6 Down progressive |
| A011986_01 | xxxx      | b/t hypothetical protein At3g13880.1 & myb fa      | 0 | -0.49 | -1.10 | 1.9 | 0.11 | 6 Down progressive |
| A011988_01 | At3g17465 | ribosomal protein L3; protein id: At3g17465.1      | 0 | -0.53 | -1.51 | 3.0 | 0.05 | 6 Down progressive |
| A012028_01 | At3g16370 | putative APG protein; protein id: At3g16370.1      | 0 | -0.80 | -2.77 | 3.4 | 0.05 | 6 Down progressive |
| A012039_01 | At3g02560 | putative 40S ribosomal protein; protein id: At3    | 0 | -0.47 | -1.80 | 2.5 | 0.05 | 6 Down progressive |
| A012080_01 | At3g12610 | DNA-damage-repair/toleration protein, putativ      | 0 | -0.65 | -2.84 | 2.6 | 0.05 | 6 Down progressive |
| A012131_01 | At3g05560 | putative 60S ribosomal protein L22; protein id:    | 0 | -0.84 | -1.83 | 3.0 | 0.05 | 6 Down progressive |
| A012185_01 | At3g51160 | GDP-D-mannose-4,6-dehydratase (MUR1); p            | 0 | -0.43 | -1.07 | 1.4 | 1.11 | 6 Down progressive |
| A012203_01 | At3g14930 | uroporphyrinogen decarboxylase, putative; prc      | 0 | -0.30 | -1.02 | 1.3 | 1.42 | 6 Down progressive |
| A012247_01 | At3g25040 | ER lumen retaining receptor (HDEL receptor),       | 0 | -0.49 | -1.03 | 1.6 | 0.41 | 6 Down progressive |
| A012259_01 | At3g07540 | expressed protein; protein id: At3g07540.1         | 0 | -0.66 | -3.32 | 1.5 | 0.47 | 6 Down progressive |
| A012309_01 | At3g28500 | acidic ribosomal protein P2b (rpp2b), putative     | 0 | -0.64 | -1.60 | 2.6 | 0.05 | 6 Down progressive |
| A012324_01 | At3g56070 | peptidylprolyl isomerase; protein id: At3g5607     | 0 | -1.24 | -2.72 | 4.0 | 0.05 | 6 Down progressive |
| A012382_01 | At3g55690 | putative protein; protein id: At3g55690.1          | 0 | -0.61 | -1.18 | 1.5 | 0.60 | 6 Down progressive |
| A012429_01 | At3g29690 | hypothetical protein; protein id: At3g29690.1      | 0 | -1.46 | -3.39 | 1.6 | 0.36 | 6 Down progressive |
| A012454_01 | At3g50070 | cyclin D3;3; protein id: At3g50070.1               | 0 | -0.77 | -1.91 | 3.5 | 0.05 | 6 Down progressive |

|            |           |                                                                             |   |       |       |     |      |                    |
|------------|-----------|-----------------------------------------------------------------------------|---|-------|-------|-----|------|--------------------|
| A012493_01 | At3g50100 | exonuclease, putative; protein id: At3g50100.1                              | 0 | -0.83 | -1.59 | 2.1 | 0.08 | 6 Down progressive |
| A012578_01 | At3g25920 | 50S ribosomal protein L15, chloroplast precursor; protein id: At3g25920.1   | 0 | -0.55 | -1.71 | 1.7 | 0.36 | 6 Down progressive |
| A012581_01 | At3g02550 | expressed protein; protein id: At3g02550.1                                  | 0 | -0.92 | -2.66 | 2.2 | 0.05 | 6 Down progressive |
| A012590_01 | At3g55280 | ribosomal L23a - like protein; protein id: At3g55280.1                      | 0 | -0.74 | -1.88 | 3.2 | 0.05 | 6 Down progressive |
| A012641_01 | At3g25660 | glutamyl-tRNA amidotransferase subunit A, putative; protein id: At3g25660.1 | 0 | -0.44 | -1.06 | 1.7 | 0.36 | 6 Down progressive |
| A012647_01 | At3g16400 | putative lectin; protein id: At3g16400.1                                    | 0 | -0.33 | -1.62 | 1.1 | 5.44 | 6 Down progressive |
| A012654_01 | At3g23940 | dihydroxyacid dehydratase, putative; protein id: At3g23940.1                | 0 | -1.17 | -2.39 | 3.1 | 0.05 | 6 Down progressive |
| A012700_01 | At3g52500 | expressed protein; protein id: At3g52500.1                                  | 0 | -0.99 | -2.24 | 3.0 | 0.05 | 6 Down progressive |
| A012773_01 | At3g18080 | glycosyl hydrolase family 1; protein id: At3g18080.1                        | 0 | -0.62 | -1.96 | 2.1 | 0.05 | 6 Down progressive |
| A012796_01 | At3g61820 | putative protein; protein id: At3g61820.1                                   | 0 | -1.08 | -2.71 | 1.6 | 0.41 | 6 Down progressive |
| A012808_01 | At3g20790 | unknown protein; protein id: At3g20790.1                                    | 0 | -0.31 | -1.58 | 1.1 | 5.44 | 6 Down progressive |
| A012844_01 | At3g04920 | putative ribosomal protein s19 or s24; protein id: At3g04920.1              | 0 | -0.51 | -1.80 | 2.3 | 0.05 | 6 Down progressive |
| A012899_01 | At4g09800 | S18.A ribosomal protein; protein id: At4g09800.1                            | 0 | -0.26 | -1.10 | 2.1 | 0.05 | 6 Down progressive |
| A013036_01 | At4g38430 | putative protein; protein id: At4g38430.1                                   | 0 | -0.25 | -1.20 | 1.6 | 0.41 | 6 Down progressive |
| A013047_01 | At4g35630 | phosphoserine aminotransferase; protein id: At4g35630.1                     | 0 | -0.63 | -1.32 | 1.5 | 0.60 | 6 Down progressive |
| A013119_01 | At4g31700 | ribosomal protein S6 - like; protein id: At4g31700.1                        | 0 | -0.71 | -2.32 | 2.2 | 0.05 | 6 Down progressive |
| A013164_01 | At4g16720 | ribosomal protein; protein id: At4g16720.1                                  | 0 | -0.60 | -1.16 | 1.8 | 0.19 | 6 Down progressive |
| A013299_01 | At4g39880 | putative protein; protein id: At4g39880.1                                   | 0 | -0.65 | -1.30 | 2.2 | 0.05 | 6 Down progressive |
| A013488_01 | At4g04890 | homeodomain protein, Protodermal factor2 (P2); protein id: At4g04890.1      | 0 | -0.45 | -1.41 | 2.1 | 0.05 | 6 Down progressive |
| A013606_01 | At4g28660 | photosystem II protein W - like; protein id: At4g28660.1                    | 0 | -0.72 | -1.46 | 1.8 | 0.19 | 6 Down progressive |
| A013614_01 | At4g30500 | putative protein; protein id: At4g30500.1                                   | 0 | -0.55 | -1.22 | 1.7 | 0.27 | 6 Down progressive |
| A013658_01 | At4g21150 | putative protein; protein id: At4g21150.1                                   | 0 | -0.43 | -1.06 | 1.2 | 2.11 | 6 Down progressive |
| A013691_01 | At4g09960 | MADS-box protein; protein id: At4g09960.1                                   | 0 | -0.85 | -2.77 | 2.8 | 0.05 | 6 Down progressive |
| A013711_01 | At4g15910 | drought-induced protein like; protein id: At4g15910.1                       | 0 | -0.74 | -2.82 | 1.5 | 0.60 | 6 Down progressive |
| A013856_01 | At4g20270 | leucine-rich repeat transmembrane protein kir1; protein id: At4g20270.1     | 0 | -0.84 | -2.48 | 1.5 | 0.60 | 6 Down progressive |
| A013872_01 | At4g38770 | extensin - like protein; protein id: At4g38770.1                            | 0 | -1.19 | -2.49 | 2.3 | 0.05 | 6 Down progressive |
| A013989_01 | At5g45775 | expressed protein; protein id: At5g45775.2                                  | 0 | -0.57 | -1.82 | 3.0 | 0.05 | 6 Down progressive |
| A014075_01 | At4g00490 | glycosyl hydrolase family 14 (beta-amylase); protein id: At4g00490.1        | 0 | -0.71 | -1.52 | 2.2 | 0.05 | 6 Down progressive |
| A014139_01 | At4g20130 | hypothetical protein; protein id: At4g20130.1                               | 0 | -0.53 | -1.15 | 1.6 | 0.41 | 6 Down progressive |
| A014203_01 | At4g38750 | hypothetical protein; protein id: At4g38750.1                               | 0 | -0.51 | -1.23 | 1.2 | 2.11 | 6 Down progressive |
| A014213_01 | At4g27090 | ribosomal protein L14 -like protein; protein id: At4g27090.1                | 0 | -0.66 | -1.50 | 1.9 | 0.08 | 6 Down progressive |
| A014256_01 | At4g10480 | putative alpha NAC; protein id: At4g10480.1                                 | 0 | -0.47 | -1.70 | 1.6 | 0.41 | 6 Down progressive |
| A014286_01 | At4g27070 | tryptophan synthase beta-subunit (TSB2); protein id: At4g27070.1            | 0 | -0.48 | -1.04 | 1.6 | 0.41 | 6 Down progressive |
| A014464_01 | At4g03210 | xyloglucan endotransglycosylase, putative; protein id: At4g03210.1          | 0 | -2.13 | -4.64 | 3.7 | 0.05 | 6 Down progressive |
| A014600_01 | At4g17520 | nuclear RNA binding protein A-like protein; protein id: At4g17520.1         | 0 | -0.33 | -1.11 | 1.2 | 2.11 | 6 Down progressive |
| A014615_01 | At4g25740 | putative ribosomal protein S10; protein id: At4g25740.1                     | 0 | -0.69 | -1.50 | 2.5 | 0.05 | 6 Down progressive |
| A014632_01 | At4g34620 | putative ribosomal protein S16; protein id: At4g34620.1                     | 0 | -0.63 | -1.63 | 2.0 | 0.08 | 6 Down progressive |
| A014655_01 | At4g14420 | elicitor like protein; protein id: At4g14420.1                              | 0 | -0.64 | -1.37 | 2.2 | 0.05 | 6 Down progressive |
| A014750_01 | At4g39330 | cinnamyl-alcohol dehydrogenase CAD1; protein id: At4g39330.1                | 0 | -1.18 | -2.77 | 2.8 | 0.05 | 6 Down progressive |
| A014771_01 | At4g00100 | putative ribosomal protein S13; protein id: At4g00100.1                     | 0 | -0.49 | -1.34 | 1.8 | 0.19 | 6 Down progressive |
| A014904_01 | At4g02150 | AtKAP alpha; protein id: At4g02150.1                                        | 0 | -0.57 | -1.07 | 1.9 | 0.17 | 6 Down progressive |
| A015072_01 | At4g39200 | ribosomal protein S25; protein id: At4g39200.1                              | 0 | -0.36 | -1.61 | 2.3 | 0.05 | 6 Down progressive |
| A015077_01 | At4g26110 | nucleosome assembly protein I-like protein; protein id: At4g26110.1         | 0 | -0.46 | -1.07 | 1.8 | 0.23 | 6 Down progressive |
| A015095_01 | At4g23820 | polygalacturonase, putative; protein id: At4g23820.1                        | 0 | -0.80 | -3.37 | 1.6 | 0.47 | 6 Down progressive |
| A015126_01 | At4g16660 | HSP like protein; protein id: At4g16660.1                                   | 0 | -0.57 | -1.16 | 1.1 | 5.44 | 6 Down progressive |

|            |           |                                                    |   |       |       |     |      |                    |
|------------|-----------|----------------------------------------------------|---|-------|-------|-----|------|--------------------|
| A015147_01 | At4g07410 | unknown protein; protein id: At4g07410.1           | 0 | -0.40 | -1.05 | 1.2 | 2.11 | 6 Down progressive |
| A015181_01 | At4g31460 | putative protein; protein id: At4g31460.1          | 0 | -0.57 | -1.18 | 2.4 | 0.05 | 6 Down progressive |
| A015242_01 | At4g33260 | fizzy-related (FZR), putative; protein id: At4g3:  | 0 | -1.39 | -2.83 | 1.6 | 0.36 | 6 Down progressive |
| A015286_01 | At4g31985 | expressed protein; protein id: At4g31985.1         | 0 | -0.77 | -1.52 | 2.7 | 0.05 | 6 Down progressive |
| A015294_01 | At4g19985 | expressed protein; protein id: At4g19985.1         | 0 | -0.23 | -1.01 | 1.3 | 1.42 | 6 Down progressive |
| A015302_01 | At4g18730 | ribosomal protein L11, cytosolic; protein id: At:  | 0 | -0.37 | -1.47 | 2.3 | 0.05 | 6 Down progressive |
| A015464_01 | At4g37240 | putative protein; protein id: At4g37240.1          | 0 | -0.59 | -1.99 | 2.5 | 0.05 | 6 Down progressive |
| A015524_01 | At5g08280 | hydroxymethylbilane synthase; protein id: At5g:    | 0 | -0.62 | -1.18 | 1.5 | 0.60 | 6 Down progressive |
| A015797_01 | At5g39410 | expressed protein; protein id: At5g39410.1         | 0 | -0.40 | -1.15 | 1.3 | 1.11 | 6 Down progressive |
| A015837_01 | At5g62230 | putative protein; protein id: At5g62230.1          | 0 | -0.85 | -1.85 | 1.8 | 0.19 | 6 Down progressive |
| A015840_01 | At5g62290 | putative protein; protein id: At5g62290.1          | 0 | -0.51 | -1.24 | 1.9 | 0.11 | 6 Down progressive |
| A015841_01 | At5g20070 | putative protein; protein id: At5g20070.1          | 0 | -0.26 | -1.02 | 1.4 | 0.75 | 6 Down progressive |
| A015940_01 | At5g60200 | Dof zinc finger protein; protein id: At5g60200.:   | 0 | -0.77 | -1.78 | 1.9 | 0.11 | 6 Down progressive |
| A015948_01 | At5g51750 | subtilisin-like serine protease; protein id: At5g: | 0 | -1.74 | -3.81 | 1.7 | 0.23 | 6 Down progressive |
| A015982_01 | At5g10360 | 40S ribosomal protein S6; protein id: At5g1036     | 0 | -0.51 | -1.73 | 2.7 | 0.05 | 6 Down progressive |
| A015995_01 | At5g61020 | putative protein; protein id: At5g61020.1          | 0 | -0.36 | -1.25 | 1.7 | 0.23 | 6 Down progressive |
| A016175_01 | At5g65010 | asparagine synthetase (gb AAC72837.1); prot        | 0 | -1.33 | -2.86 | 3.3 | 0.05 | 6 Down progressive |
| A016187_01 | At5g62300 | ribosomal protein S20 - like; protein id: At5g6:   | 0 | -0.68 | -1.89 | 2.2 | 0.05 | 6 Down progressive |
| A016198_01 | At5g19780 | tubulin alpha-5 chain; protein id: At5g19780.1     | 0 | -0.45 | -1.53 | 1.3 | 1.11 | 6 Down progressive |
| A016285_01 | At5g48230 | acetyl-CoA C-acetyltransferase; protein id: At:    | 0 | -0.27 | -1.08 | 1.9 | 0.17 | 6 Down progressive |
| A016376_01 | At5g56360 | calmodulin-binding protein; protein id: At5g56:    | 0 | -0.69 | -1.56 | 2.2 | 0.05 | 6 Down progressive |
| A016453_01 | At5g47210 | putative protein; protein id: At5g47210.1          | 0 | -0.44 | -1.57 | 1.5 | 0.47 | 6 Down progressive |
| A016466_01 | At5g01090 | lectin - like protein; protein id: At5g01090.1     | 0 | -0.52 | -1.36 | 2.3 | 0.05 | 6 Down progressive |
| A016676_01 | At5g02540 | putative protein; protein id: At5g02540.1          | 0 | -0.93 | -2.52 | 2.2 | 0.05 | 6 Down progressive |
| A016860_01 | At5g09760 | pectin methylesterase - like protein; protein id   | 0 | -0.79 | -1.81 | 1.2 | 2.11 | 6 Down progressive |
| A016977_01 | At5g50790 | MtN3-like protein; protein id: At5g50790.1         | 0 | -0.32 | -1.39 | 2.8 | 0.05 | 6 Down progressive |
| A017010_01 | At5g02960 | putative protein; protein id: At5g02960.1          | 0 | -0.51 | -1.55 | 2.1 | 0.08 | 6 Down progressive |
| A017015_01 | At5g17870 | plastid-specific ribosomal protein 6 precursor     | 0 | -0.54 | -1.33 | 1.7 | 0.36 | 6 Down progressive |
| A017016_01 | At5g02450 | 60S ribosomal protein - like; protein id: At5g0:   | 0 | -0.53 | -2.07 | 3.3 | 0.05 | 6 Down progressive |
| A017022_01 | At5g41050 | expressed protein; protein id: At5g41050.1         | 0 | -0.21 | -1.01 | 1.8 | 0.23 | 6 Down progressive |
| A017026_01 | At5g17770 | NADH-cytochrome b5 reductase; protein id: A        | 0 | -0.57 | -1.10 | 1.5 | 0.60 | 6 Down progressive |
| A017038_01 | At5g26000 | glycosyl hydrolase family 1, myrosinase precu      | 0 | -0.80 | -4.01 | 5.0 | 0.05 | 6 Down progressive |
| A017048_01 | At5g52650 | putative protein; protein id: At5g52650.1          | 0 | -0.66 | -1.69 | 3.0 | 0.05 | 6 Down progressive |
| A017049_01 | At5g14210 | leucine-rich repeat transmembrane protein kir      | 0 | -0.56 | -1.56 | 2.8 | 0.05 | 6 Down progressive |
| A017063_01 | At5g08620 | DEAD/DEAH box RNA helicase, putative               | 0 | -0.90 | -1.83 | 2.5 | 0.05 | 6 Down progressive |
| A017088_01 | At5g15350 | putative protein; protein id: At5g15350.1          | 0 | -0.95 | -1.99 | 2.6 | 0.05 | 6 Down progressive |
| A017092_01 | At5g15230 | GASA4; protein id: At5g15230.1                     | 0 | -1.02 | -2.87 | 4.3 | 0.05 | 6 Down progressive |
| A017095_01 | At5g58960 | putative protein; protein id: At5g58960.1          | 0 | -0.80 | -1.67 | 1.9 | 0.11 | 6 Down progressive |
| A017207_01 | At5g55220 | trigger factor-like protein; protein id: At5g5522  | 0 | -0.66 | -1.25 | 1.3 | 1.42 | 6 Down progressive |
| A017293_01 | At5g03740 | histone deacetylase -like protein; protein id: A:  | 0 | -0.61 | -1.45 | 1.6 | 0.41 | 6 Down progressive |
| A017466_01 | At5g11640 | TITL putative protein; protein id: At5g11640.1     | 0 | -0.54 | -1.15 | 1.8 | 0.19 | 6 Down progressive |
| A017657_01 | At5g45930 | magnesium chelatase subunit of protochlorophy      | 0 | -0.68 | -1.31 | 1.4 | 1.11 | 6 Down progressive |
| A017659_01 | At5g44730 | Dreg-2 like protein; protein id: At5g44730.1       | 0 | -0.46 | -1.15 | 1.9 | 0.11 | 6 Down progressive |
| A017701_01 | At5g47930 | putative ribosomal protein S27:AT5g47930           | 0 | -0.86 | -1.66 | 2.5 | 0.05 | 6 Down progressive |
| A017714_01 | At5g47500 | pectinesterase family; protein id: At5g47500.1     | 0 | -0.74 | -3.58 | 2.5 | 0.05 | 6 Down progressive |

|            |           |                                                    |   |       |       |     |      |                    |
|------------|-----------|----------------------------------------------------|---|-------|-------|-----|------|--------------------|
| A017768_01 | At5g13120 | peptidyl-prolyl isomerase protein; protein id: A   | 0 | -0.62 | -1.27 | 1.4 | 1.11 | 6 Down progressive |
| A017808_01 | At5g51820 | phosphoglucosyltransferase (emb CAB64725.1); p     | 0 | -0.45 | -1.17 | 1.3 | 1.42 | 6 Down progressive |
| A017837_01 | At5g09650 | inorganic pyrophosphatase - like protein; prote    | 0 | -0.71 | -1.38 | 1.8 | 0.23 | 6 Down progressive |
| A017894_01 | At5g02870 | 60S ribosomal protein - like; protein id: At5g02   | 0 | -1.22 | -2.21 | 3.4 | 0.05 | 6 Down progressive |
| A017972_01 | At5g50000 | protein kinase; protein id: At5g50000.1            | 0 | -0.23 | -1.14 | 1.9 | 0.11 | 6 Down progressive |
| A018028_01 | At5g39740 | ribosomal protein L5 - like; protein id: At5g397   | 0 | -0.45 | -1.77 | 1.8 | 0.17 | 6 Down progressive |
| A018042_01 | At5g66860 | putative protein; protein id: At5g66860.1          | 0 | -0.44 | -1.07 | 2.3 | 0.05 | 6 Down progressive |
| A018071_01 | At5g46700 | senescence-associated protein 5-like protein;      | 0 | -0.94 | -1.97 | 1.5 | 0.60 | 6 Down progressive |
| A018277_01 | At5g08180 | nhp2-like protein; protein id: At5g08180.1         | 0 | -0.94 | -1.95 | 3.3 | 0.05 | 6 Down progressive |
| A018297_01 | At5g47190 | putative protein; protein id: At5g47190.1          | 0 | -0.68 | -1.40 | 1.6 | 0.41 | 6 Down progressive |
| A018343_01 | At5g57280 | protein carboxyl methylase-like; protein id: At5   | 0 | -0.43 | -1.29 | 2.7 | 0.05 | 6 Down progressive |
| A018506_01 | At5g16070 | TCP-1 chaperonin-like protein; protein id: At5g    | 0 | -0.66 | -1.89 | 3.0 | 0.05 | 6 Down progressive |
| A018635_01 | At5g61980 | GCN4-complementing protein - like; protein id      | 0 | -0.21 | -1.14 | 1.7 | 0.27 | 6 Down progressive |
| A018662_01 | At5g35540 | putative protein; protein id: At5g35540.1          | 0 | -1.09 | -2.02 | 2.2 | 0.05 | 6 Down progressive |
| A018840_01 | At5g40950 | 50S ribosomal protein L27; protein id: At5g409     | 0 | -0.31 | -1.08 | 1.3 | 1.42 | 6 Down progressive |
| A018869_01 | At5g60670 | 60S ribosomal protein L12 - like; protein id: At   | 0 | -0.76 | -2.74 | 2.1 | 0.08 | 6 Down progressive |
| A018915_01 | At5g65440 | putative protein; protein id: At5g65440.1          | 0 | -0.69 | -2.03 | 2.6 | 0.05 | 6 Down progressive |
| A019145_01 | At5g22740 | glucosyltransferase-like protein; protein id: At5  | 0 | -0.57 | -2.45 | 3.5 | 0.05 | 6 Down progressive |
| A019187_01 | At5g60960 | putative protein; protein id: At5g60960.1          | 0 | -0.58 | -1.45 | 1.9 | 0.17 | 6 Down progressive |
| A019261_01 | At5g55230 | putative protein; protein id: At5g55230.1          | 0 | -0.70 | -1.33 | 2.0 | 0.08 | 6 Down progressive |
| A019305_01 | At5g37300 | putative protein; protein id: At5g37300.1          | 0 | -0.87 | -3.35 | 2.2 | 0.05 | 6 Down progressive |
| A019324_01 | At5g23310 | iron superoxide dismutase (FSD3); protein id:      | 0 | -0.96 | -2.03 | 2.5 | 0.05 | 6 Down progressive |
| A019480_01 | At3g57490 | 40S ribosomal protein S2 homolog; protein id:      | 0 | -0.77 | -1.78 | 2.6 | 0.05 | 6 Down progressive |
| A019485_01 | At3g46970 | starch phosphorylase, putative; protein id: At3    | 0 | -0.60 | -1.59 | 1.4 | 1.11 | 6 Down progressive |
| A019517_01 | At4g18030 | putative protein; protein id: At4g18030.1          | 0 | -0.63 | -1.19 | 1.6 | 0.41 | 6 Down progressive |
| A019538_01 | At4g33790 | male sterility 2-like protein; protein id: At4g337 | 0 | -1.09 | -2.69 | 1.3 | 1.42 | 6 Down progressive |
| A019641_01 | At3g28900 | 60S ribosomal protein L34, putative; protein ic    | 0 | -0.82 | -2.05 | 2.7 | 0.05 | 6 Down progressive |
| A019710_01 | At5g23900 | 60S ribosomal protein L13; protein id: At5g239     | 0 | -0.35 | -1.84 | 2.0 | 0.08 | 6 Down progressive |
| A019741_01 | At5g01240 | LAX1 / AUX1 -like permease; protein id: At5g0      | 0 | -0.34 | -1.34 | 1.8 | 0.19 | 6 Down progressive |
| A019748_01 | At1g70370 | aromatic rich glycoprotein, putative; protein id:  | 0 | -0.93 | -2.97 | 1.6 | 0.47 | 6 Down progressive |
| A019761_01 | At1g04680 | putative pectate lyase A11; protein id: At1g046    | 0 | -0.70 | -2.02 | 3.0 | 0.05 | 6 Down progressive |
| A019828_01 | At2g29390 | putative C-4 sterol methyl oxidase; protein id:    | 0 | -0.41 | -1.06 | 1.3 | 1.42 | 6 Down progressive |
| A019834_01 | At2g35120 | glycine decarboxylase complex H-protein; pro       | 0 | -0.48 | -1.11 | 1.7 | 0.23 | 6 Down progressive |
| A019858_01 | At2g39010 | putative aquaporin (water channel protein); pr     | 0 | -0.42 | -1.43 | 2.1 | 0.05 | 6 Down progressive |
| A019882_01 | At2g20490 | expressed protein; protein id: At2g20490.1         | 0 | -0.74 | -1.57 | 2.4 | 0.05 | 6 Down progressive |
| A019885_01 | At2g21580 | 40S ribosomal protein S25; protein id: At2g21      | 0 | -0.71 | -1.39 | 2.4 | 0.05 | 6 Down progressive |
| A019887_01 | At2g36160 | 40S ribosomal protein S14; protein id: At2g36      | 0 | -0.66 | -1.63 | 2.9 | 0.05 | 6 Down progressive |
| A019991_01 | At1g73230 | putative transcription factor BTF3 (RNA polym      | 0 | -0.79 | -1.46 | 2.6 | 0.05 | 6 Down progressive |
| A020012_01 | At4g26590 | isp4 like protein; protein id: At4g26590.1         | 0 | -0.81 | -2.07 | 1.3 | 1.42 | 6 Down progressive |
| A020014_01 | At2g45470 | fasciclin-like arabinogalactan-protein (FLA8);     | 0 | -1.13 | -2.26 | 3.1 | 0.05 | 6 Down progressive |
| A020016_01 | At4g17460 | homeobox-leucine zipper protein HAT1 (HD-Z         | 0 | -0.67 | -2.02 | 2.8 | 0.05 | 6 Down progressive |
| A020039_01 | xxxx      | b/t hypothetical protein; protein id: At3g02510.   | 0 | -0.74 | -1.65 | 2.4 | 0.05 | 6 Down progressive |
| A020071_01 | At1g22990 | copper chaperone (CCH)-related; protein id: A      | 0 | -0.61 | -1.82 | 1.8 | 0.17 | 6 Down progressive |
| A020086_01 | At2g39460 | 60S ribosomal protein L23A; protein id: At2g3      | 0 | -0.71 | -1.54 | 2.7 | 0.05 | 6 Down progressive |
| A020197_01 | At4g01310 | putative L5 ribosomal protein; protein id: At4g    | 0 | -0.68 | -1.31 | 1.4 | 1.11 | 6 Down progressive |

|            |           |                                                     |   |       |       |     |      |                    |
|------------|-----------|-----------------------------------------------------|---|-------|-------|-----|------|--------------------|
| A020300_01 | At1g22780 | putative 40S ribosomal protein S18; protein id      | 0 | -0.46 | -2.00 | 2.7 | 0.05 | 6 Down progressive |
| A020303_01 | At5g19510 | elongation factor 1B alpha-subunit; protein id:     | 0 | -0.30 | -1.58 | 1.6 | 0.36 | 6 Down progressive |
| A020314_01 | At2g28190 | copper/zinc superoxide dismutase (CSD2); pr         | 0 | -1.40 | -3.70 | 1.7 | 0.27 | 6 Down progressive |
| A020340_01 | At3g43980 | ribosomal S29 -like protein; protein id: At3g43     | 0 | -0.77 | -1.62 | 3.0 | 0.05 | 6 Down progressive |
| A020349_01 | At3g26060 | putative peroxiredoxin; protein id: At3g26060.      | 0 | -0.54 | -1.91 | 1.5 | 0.60 | 6 Down progressive |
| A020381_01 | At5g28060 | 40S ribosomal protein S19 - like; protein id: At    | 0 | -0.82 | -2.06 | 2.5 | 0.05 | 6 Down progressive |
| A020390_01 | At2g22500 | mitochondrial carrier protein family; protein id:   | 0 | -0.73 | -1.36 | 1.1 | 5.44 | 6 Down progressive |
| A020428_01 | At1g17840 | ABC transporter family protein; protein id: At1     | 0 | -0.31 | -1.10 | 1.3 | 1.42 | 6 Down progressive |
| A020440_01 | At5g46430 | ribosomal protein L32; protein id: At5g46430.1      | 0 | -0.46 | -1.32 | 2.0 | 0.08 | 6 Down progressive |
| A020550_01 | At3g07110 | putative 60S ribosomal protein L13A; protein i      | 0 | -0.66 | -1.88 | 2.4 | 0.05 | 6 Down progressive |
| A020557_01 | At5g23740 | 40S ribosomal protein S11; protein id: At5g23       | 0 | -0.62 | -1.33 | 1.6 | 0.36 | 6 Down progressive |
| A020599_01 | At1g79500 | 2-dehydro-3-deoxyphosphooctonate aldolase,          | 0 | -1.01 | -2.03 | 2.5 | 0.05 | 6 Down progressive |
| A020643_01 | At4g28050 | senescence-associated protein -like; protein ic     | 0 | -0.76 | -1.90 | 1.3 | 1.42 | 6 Down progressive |
| A020689_01 | At3g44750 | putative histone deacetylase; protein id: At3g4     | 0 | -1.60 | -2.88 | 4.9 | 0.05 | 6 Down progressive |
| A020697_01 | At1g78630 | ribosomal protein L13, putative; protein id: At1    | 0 | -0.45 | -1.32 | 1.5 | 0.60 | 6 Down progressive |
| A020704_01 | At1g02205 | hypothetical protein; protein id: At1g02205.1       | 0 | -0.59 | -1.56 | 1.6 | 0.36 | 6 Down progressive |
| A020733_01 | At5g47770 | farnesyl pyrophosphate synthetase 1 (FPS1) (        | 0 | -0.93 | -1.95 | 2.3 | 0.05 | 6 Down progressive |
| A020735_01 | At4g02500 | putative glycosyltransferase; protein id: At4g0:    | 0 | -0.63 | -1.85 | 2.1 | 0.08 | 6 Down progressive |
| A020797_01 | At5g52470 | fibrillarin 1 AtFib1/SKIP7; protein id: At5g5247    | 0 | -0.46 | -1.24 | 2.3 | 0.05 | 6 Down progressive |
| A020835_01 | At1g29070 | plastid ribosomal protein L34 precursor, putati     | 0 | -0.53 | -1.27 | 1.5 | 0.60 | 6 Down progressive |
| A020842_01 | At1g04270 | putative 40S ribosomal protein S15; protein id      | 0 | -0.76 | -1.53 | 2.9 | 0.05 | 6 Down progressive |
| A020910_01 | At5g13710 | 24-sterol C-methyltransferase; protein id: At5g     | 0 | -0.33 | -1.61 | 2.5 | 0.05 | 6 Down progressive |
| A020919_01 | At3g25860 | dihydrolipoamide S-acetyltransferase; protein       | 0 | -0.87 | -2.22 | 2.8 | 0.05 | 6 Down progressive |
| A020930_01 | At1g48750 | lipid transfer protein, putative; protein id: At1g. | 0 | -0.58 | -3.06 | 4.3 | 0.05 | 6 Down progressive |
| A020974_01 | At5g43270 | squamosa promoter binding protein-like 2 (err       | 0 | -0.58 | -1.57 | 2.0 | 0.08 | 6 Down progressive |
| A020978_01 | At3g20210 | vacuolar processing enzyme/asparaginyl endo         | 0 | -1.45 | -2.96 | 2.2 | 0.05 | 6 Down progressive |
| A020998_01 | At2g47610 | 60S ribosomal protein L7A; protein id: At2g47       | 0 | -0.76 | -1.67 | 2.4 | 0.05 | 6 Down progressive |
| A020999_01 | At1g58380 | ribosomal protein S2, putative; protein id: At1g    | 0 | -0.61 | -1.40 | 2.0 | 0.08 | 6 Down progressive |
| A021037_01 | At4g12420 | pectinesterase (pectin methylesterase) family;      | 0 | -0.66 | -2.03 | 1.8 | 0.17 | 6 Down progressive |
| A021044_01 | At4g24780 | putative pectate lyase; protein id: At4g24780.1     | 0 | -1.13 | -2.27 | 2.1 | 0.08 | 6 Down progressive |
| A021049_01 | At2g27720 | 60S acidic ribosomal protein P2; protein id: At     | 0 | -0.55 | -1.50 | 2.1 | 0.08 | 6 Down progressive |
| A021100_01 | At1g02780 | ribosomal protein L19, putative; protein id: At1    | 0 | -0.63 | -1.26 | 1.8 | 0.17 | 6 Down progressive |
| A021222_01 | At3g62250 | ubiquitin extension protein (UBQ5); protein id:     | 0 | -0.58 | -1.52 | 2.3 | 0.05 | 6 Down progressive |
| A021233_01 | At3g59540 | 60S RIBOSOMAL PROTEIN L38-like protein;             | 0 | -0.79 | -1.58 | 2.4 | 0.05 | 6 Down progressive |
| A021252_01 | At3g45030 | 40S ribosomal protein; protein id: At3g45030        | 0 | -0.50 | -1.45 | 2.3 | 0.05 | 6 Down progressive |
| A021253_01 | At5g15200 | 40S ribosomal protein - like; protein id: At5g15    | 0 | -0.66 | -2.25 | 2.2 | 0.05 | 6 Down progressive |
| A021261_01 | At4g36130 | putative ribosomal protein L8; protein id: At4g;    | 0 | -0.37 | -1.55 | 1.8 | 0.19 | 6 Down progressive |
| A021274_01 | At4g26230 | putative ribosomal protein; protein id: At4g262     | 0 | -0.46 | -1.65 | 2.7 | 0.05 | 6 Down progressive |
| A021293_01 | At4g29770 | expressed protein; protein id: At4g29770.1          | 0 | -0.75 | -1.49 | 2.6 | 0.05 | 6 Down progressive |
| A021303_01 | At3g47370 | 40S ribosomal protein S20-like protein; proteir     | 0 | -0.68 | -1.28 | 1.5 | 0.60 | 6 Down progressive |
| A021344_01 | At5g07090 | 40S ribosomal protein S4; protein id: At5g070       | 0 | -0.43 | -1.85 | 1.8 | 0.19 | 6 Down progressive |
| A021389_01 | At3g18740 | 60S ribosomal protein, putative; protein id: At     | 0 | -0.88 | -1.73 | 2.6 | 0.05 | 6 Down progressive |
| A021434_01 | At5g45750 | putative Rab-type small GTP-binding protein         | 0 | -0.75 | -1.76 | 2.6 | 0.05 | 6 Down progressive |
| A021472_01 | At5g43640 | 40S ribosomal protein S15; protein id: At5g43       | 0 | -0.52 | -1.04 | 1.2 | 2.11 | 6 Down progressive |
| A021494_01 | At5g40130 | 60S RIBOSOMAL PROTEIN L5 -like; protein i           | 0 | -0.69 | -1.58 | 3.0 | 0.05 | 6 Down progressive |

|            |           |                                                     |   |       |       |     |      |                    |
|------------|-----------|-----------------------------------------------------|---|-------|-------|-----|------|--------------------|
| A021497_01 | At5g56670 | 40S ribosomal protein S30 homolog (emb CA           | 0 | -0.96 | -2.02 | 3.9 | 0.05 | 6 Down progressive |
| A021500_01 | At5g47700 | 60S acidic ribosomal protein P1-like protein; p     | 0 | -0.74 | -1.49 | 2.6 | 0.05 | 6 Down progressive |
| A021510_01 | At5g58420 | ribosomal protein S4 - like; protein id: At5g584    | 0 | -0.72 | -1.97 | 2.7 | 0.05 | 6 Down progressive |
| A021517_01 | At5g09510 | ribosomal protein S15-like; protein id: At5g095     | 0 | -0.55 | -1.21 | 1.7 | 0.27 | 6 Down progressive |
| A021539_01 | At1g29410 | phosphoribosylanthranilate isomerase; proteir       | 0 | -0.28 | -1.03 | 1.8 | 0.23 | 6 Down progressive |
| A021577_01 | At1g01100 | acidic ribosomal protein, putative; protein id: A   | 0 | -0.58 | -1.50 | 2.8 | 0.05 | 6 Down progressive |
| A021593_01 | At2g29310 | putative tropinone reductase; protein id: At2g2     | 0 | -0.26 | -1.41 | 1.2 | 1.42 | 6 Down progressive |
| A021601_01 | At2g37600 | 60S ribosomal protein L36; protein id: At2g376      | 0 | -0.63 | -1.64 | 2.8 | 0.05 | 6 Down progressive |
| A021647_01 | At2g20450 | 60S ribosomal protein L14; protein id: At2g204      | 0 | -0.66 | -1.39 | 2.5 | 0.05 | 6 Down progressive |
| A021701_01 | At1g27400 | putative 60S ribosomal protein L17; protein id:     | 0 | -0.94 | -1.91 | 3.3 | 0.05 | 6 Down progressive |
| A021712_01 | At1g3135  | pseudogene, putative 60s ribosomal protein; p       | 0 | -0.89 | -2.04 | 3.1 | 0.05 | 6 Down progressive |
| A021730_01 | At3g06680 | ribosomal protein L29, putative; protein id: At3    | 0 | -0.97 | -1.82 | 3.2 | 0.05 | 6 Down progressive |
| A021771_01 | At3g02190 | putative ribosomal protein L39; protein id: At3     | 0 | -0.58 | -1.55 | 3.2 | 0.05 | 6 Down progressive |
| A021782_01 | At3g09500 | putative 60S ribosomal protein L35; protein id:     | 0 | -0.55 | -1.56 | 2.5 | 0.05 | 6 Down progressive |
| A021802_01 | At4g29410 | putative protein; protein id: At4g29410.1           | 0 | -1.05 | -2.22 | 3.1 | 0.05 | 6 Down progressive |
| A021803_01 | At3g44010 | ribosomal protein S29 - like; protein id: At3g44    | 0 | -0.56 | -1.05 | 1.9 | 0.11 | 6 Down progressive |
| A021856_01 | At2g32060 | 40S ribosomal protein S12; protein id: At2g32       | 0 | -0.37 | -1.27 | 2.4 | 0.05 | 6 Down progressive |
| A021857_01 | At5g56710 | 60S ribosomal protein L31; protein id: At5g567      | 0 | -0.61 | -1.75 | 3.3 | 0.05 | 6 Down progressive |
| A021884_01 | At1g23290 | 60s ribosomal protein l27a.; protein id: At1g23     | 0 | -0.69 | -1.91 | 2.9 | 0.05 | 6 Down progressive |
| A021889_01 | At5g02610 | ribosomal protein L35 - like; protein id: At5g02    | 0 | -0.41 | -1.32 | 2.2 | 0.05 | 6 Down progressive |
| A021903_01 | At3g61640 | arabinogalactan-protein (AGP20); protein id: A      | 0 | -0.48 | -1.08 | 1.4 | 1.11 | 6 Down progressive |
| A021905_01 | At3g53740 | 60S RIBOSOMAL PROTEIN L36 homolog; pr               | 0 | -0.46 | -1.22 | 1.9 | 0.17 | 6 Down progressive |
| A021931_01 | At3g14600 | putative 60S ribosomal protein L18A; protein i      | 0 | -0.76 | -1.88 | 2.5 | 0.05 | 6 Down progressive |
| A021933_01 | At2g19750 | 40S ribosomal protein S30; protein id: At2g19       | 0 | -0.54 | -1.05 | 2.3 | 0.05 | 6 Down progressive |
| A021950_01 | At3g53430 | 60S RIBOSOMAL PROTEIN L12 -like; proteir            | 0 | -0.42 | -1.26 | 2.1 | 0.05 | 6 Down progressive |
| A021961_01 | At2g36170 | ubiquitin extension protein (UBQ2); protein id:     | 0 | -0.83 | -1.69 | 2.9 | 0.05 | 6 Down progressive |
| A021971_01 | At5g35530 | 40S ribosomal protein S3; protein id: At5g355       | 0 | -0.36 | -1.20 | 1.6 | 0.36 | 6 Down progressive |
| A021982_01 | At2g44120 | 60S ribosomal protein L7; protein id: At2g441       | 0 | -0.47 | -2.21 | 2.8 | 0.05 | 6 Down progressive |
| A021992_01 | At2g27710 | 60S acidic ribosomal protein P2; protein id: At     | 0 | -0.82 | -1.75 | 2.3 | 0.05 | 6 Down progressive |
| A021994_01 | At1g74060 | putative 60S ribosomal protein L6; protein id: ,    | 0 | -0.44 | -1.08 | 1.6 | 0.47 | 6 Down progressive |
| A021997_01 | At5g16130 | 40S ribosomal protein S7-like; protein id: At5g     | 0 | -0.57 | -2.44 | 2.7 | 0.05 | 6 Down progressive |
| A022010_01 | At4g18100 | ribosomal protein L32 -like protein; protein id:    | 0 | -0.89 | -2.13 | 2.8 | 0.05 | 6 Down progressive |
| A022018_01 | At3g52580 | putative ribosomal protein S14; protein id: At3     | 0 | -0.65 | -1.41 | 2.1 | 0.05 | 6 Down progressive |
| A022021_01 | At3g11940 | 40S ribosomal protein S5, putative; protein id:     | 0 | -0.86 | -2.08 | 3.0 | 0.05 | 6 Down progressive |
| A022026_01 | At4g15000 | ribosomal protein; protein id: At4g15000.1          | 0 | -0.69 | -2.03 | 2.6 | 0.05 | 6 Down progressive |
| A022044_01 | At3g25520 | ribosomal protein, putative; protein id: At3g255    | 0 | -0.59 | -2.05 | 2.2 | 0.05 | 6 Down progressive |
| A022107_01 | At4g34670 | Putative S-phase-specific ribosomal protein; p      | 0 | -0.51 | -1.69 | 2.4 | 0.05 | 6 Down progressive |
| A022202_01 | At3g60450 | putative protein; protein id: At3g60450.1           | 0 | -0.40 | -1.13 | 1.4 | 1.11 | 6 Down progressive |
| A022225_01 | At3g50280 | anthranilate N-hydroxycinnamoyl/benzoyltrans        | 0 | -0.56 | -2.26 | 1.4 | 1.11 | 6 Down progressive |
| A022790_01 | At5g41370 | DNA excision repair cross-complementing prc         | 0 | -0.34 | -1.12 | 1.5 | 0.60 | 6 Down progressive |
| A022821_01 | At5g53720 | RRM-containing protein; protein id: At5g53720       | 0 | -1.74 | -3.80 | 4.9 | 0.05 | 6 Down progressive |
| A022844_01 | At5g43080 | cyclin A3;1; protein id: At5g43080.1                | 0 | -0.35 | -1.62 | 2.2 | 0.05 | 6 Down progressive |
| A022919_01 | At5g61170 | 40S ribosomal protein S19 - like; protein id: At5   | 0 | -1.04 | -1.88 | 2.8 | 0.05 | 6 Down progressive |
| A022990_01 | At5g38590 | putative protein; protein id: At5g38590.1           | 0 | -0.90 | -2.08 | 2.6 | 0.05 | 6 Down progressive |
| A023137_01 | At5g06110 | cell division related protein-like; protein id: At5 | 0 | -0.29 | -1.15 | 1.5 | 0.47 | 6 Down progressive |

|            |           |                                                     |   |       |       |     |      |                            |
|------------|-----------|-----------------------------------------------------|---|-------|-------|-----|------|----------------------------|
| A023347_01 | At2g40590 | 40S ribosomal protein S26; protein id: At2g40       | 0 | -0.48 | -1.31 | 2.0 | 0.08 | 6 Down progressive         |
| A023457_01 | At2g19720 | 40S ribosomal protein S15A; protein id: At2g1       | 0 | -0.56 | -1.72 | 2.0 | 0.08 | 6 Down progressive         |
| A023476_01 | At2g45970 | cytochrome P450, putative; protein id: At2g45       | 0 | -0.71 | -1.94 | 3.2 | 0.05 | 6 Down progressive         |
| A023824_01 | At1g50660 | unknown protein; protein id: At1g50660.1            | 0 | -0.38 | -1.09 | 1.2 | 2.11 | 6 Down progressive         |
| A024051_01 | At3g05230 | expressed protein; protein id: At3g05230.1          | 0 | -0.80 | -1.44 | 1.3 | 1.11 | 6 Down progressive         |
| A024101_01 | At1g08210 | expressed protein; protein id: At1g08210.1          | 0 | -0.46 | -1.11 | 1.6 | 0.36 | 6 Down progressive         |
| A024105_01 | At2g27530 | 60S ribosomal protein L10A; protein id: At2g2       | 0 | -0.90 | -1.76 | 2.7 | 0.05 | 6 Down progressive         |
| A024215_01 | At4g36250 | aldehyde dehydrogenase like protein; protein        | 0 | -0.71 | -1.38 | 2.4 | 0.05 | 6 Down progressive         |
| A024310_01 | At2g47110 | ubiquitin extension protein (UBQ6); protein id:     | 0 | -0.72 | -1.78 | 2.4 | 0.05 | 6 Down progressive         |
| A024311_01 | At2g19620 | putative SF21 protein {Helianthus annuus}; pr       | 0 | -0.99 | -1.95 | 3.1 | 0.05 | 6 Down progressive         |
| A024342_01 | At1g29470 | unknown protein; protein id: At1g29470.1            | 0 | -0.65 | -1.34 | 1.2 | 2.11 | 6 Down progressive         |
| A024343_01 | At1g56110 | SAR DNA binding protein, putative; protein id:      | 0 | -1.00 | -1.95 | 1.9 | 0.11 | 6 Down progressive         |
| A024361_01 | At2g31610 | 40S ribosomal protein S3, putative; protein id:     | 0 | -0.49 | -1.84 | 2.0 | 0.08 | 6 Down progressive         |
| A024392_01 | At2g40510 | 40S ribosomal protein S26; protein id: At2g40       | 0 | -0.62 | -1.27 | 2.1 | 0.05 | 6 Down progressive         |
| A024410_01 | At3g60770 | ribosomal protein S13 -like; protein id: At3g60     | 0 | -0.50 | -1.50 | 1.9 | 0.11 | 6 Down progressive         |
| A024443_01 | At2g25210 | 60S ribosomal protein L39; protein id: At2g25;      | 0 | -0.70 | -1.77 | 3.5 | 0.05 | 6 Down progressive         |
| A024521_01 | At1g17200 | expressed protein; protein id: At1g17200.1          | 0 | -0.40 | -1.91 | 3.4 | 0.05 | 6 Down progressive         |
| A024531_01 | At1g36160 | hypothetical protein; protein id: At1g36160.1       | 0 | -0.27 | -1.09 | 1.2 | 1.42 | 6 Down progressive         |
| A024562_01 | At1g43170 | ribosomal protein; protein id: At1g43170.1          | 0 | -0.47 | -1.65 | 2.2 | 0.05 | 6 Down progressive         |
| A024586_01 | At1g19920 | sulfate adenylyltransferase; protein id: At1g19     | 0 | -0.32 | -1.63 | 2.4 | 0.05 | 6 Down progressive         |
| A024630_01 | At1g18540 | 60S ribosomal protein L6, putative; protein id:     | 0 | -0.94 | -1.88 | 2.2 | 0.05 | 6 Down progressive         |
| A024637_01 | At1g48830 | 40S ribosomal protein S7 homolog, putative; p       | 0 | -0.73 | -1.66 | 2.8 | 0.05 | 6 Down progressive         |
| A024644_01 | At3g49910 | 60S RIBOSOMAL PROTEIN - like; protein id:           | 0 | -0.54 | -1.68 | 1.7 | 0.23 | 6 Down progressive         |
| A024647_01 | At3g28860 | multidrug resistance P-glycoprotein, putative;      | 0 | -0.92 | -2.57 | 1.5 | 0.60 | 6 Down progressive         |
| A024725_01 | At5g50150 | putative protein; protein id: At5g50150.1           | 0 | -0.47 | -2.25 | 3.6 | 0.05 | 6 Down progressive         |
| A024978_01 | At4g01560 | expressed protein; protein id: At4g01560.1          | 0 | -0.61 | -1.17 | 2.2 | 0.05 | 6 Down progressive         |
| A025085_01 | At5g11230 | putative protein; protein id: At5g11230.1           | 0 | -0.79 | -1.69 | 1.8 | 0.23 | 6 Down progressive         |
| A025479_01 | At2g42580 | expressed protein; protein id: At2g42580.1          | 0 | -0.33 | -1.22 | 1.7 | 0.36 | 6 Down progressive         |
| A025900_01 | At1g71890 | putative sucrose transport protein; protein id: ;   | 0 | -0.31 | -1.40 | 2.0 | 0.08 | 6 Down progressive         |
| A025969_01 | At3g09630 | putative 60S ribosomal protein L1; protein id: ;    | 0 | -0.61 | -1.63 | 2.1 | 0.08 | 6 Down progressive         |
| A004129_01 | At1g33475 | similar to RRM-containing protein; protein id: ;    | 0 | -0.70 | -1.71 | 1.2 | 2.11 | 6 Down progressive         |
| A005189_01 | At1g76405 | auxin-regulated protein; protein id: At1g76405      | 0 | -0.71 | -1.64 | 1.6 | 0.41 | 6 Down progressive         |
| A007839_01 | At2g43270 | putative myb-related transcription factor; prote    | 0 | -0.74 | -1.67 | 1.2 | 2.11 | 6 Down progressive         |
| A012676_01 | At3g43720 | lipid-transfer protein-like protein; protein id: At | 0 | -0.54 | -1.13 | 1.2 | 2.11 | 6 Down progressive         |
| A016737_01 | At5g11630 | putative protein; protein id: At5g11630.1           | 0 | -0.60 | -1.36 | 2.0 | 0.08 | 6 Down progressive         |
| A017675_01 | At5g42060 | putative protein; protein id: At5g42060.1           | 0 | -0.57 | -1.52 | 1.7 | 0.27 | 6 Down progressive         |
| A019735_01 | At5g62070 | putative protein; protein id: At5g62070.1           | 0 | -0.65 | -1.17 | 1.2 | 2.11 | 6 Down progressive         |
| A009204_01 | At3g55110 | ABC transporter family protein; protein id: At3;    | 0 | -0.45 | -1.86 | 2.3 | 0.05 | 6 Down progressive         |
| A009718_01 | At3g24830 | 60S ribosomal protein, putative; protein id: At;    | 0 | -0.45 | -1.71 | 2.6 | 0.05 | 6 Down progressive         |
| A013881_01 | At4g32270 | compared to genome                                  | 0 | -0.87 | -1.58 | 1.7 | 0.36 | 6 Down progressive         |
| A019001_01 | At5g22440 | 60S ribosomal protein L10A; protein id: At5g2       | 0 | -0.73 | -2.10 | 2.7 | 0.05 | 6 Down progressive         |
| A001129_01 | At1g78370 | glutathione transferase, putative; protein id: At   | 0 | -2.57 | -0.56 | 1.8 | 0.19 | 7 Down early and transient |
| A002142_01 | At1g56450 | 20S proteasome beta subunit G1 (PBG1); pro          | 0 | -1.00 | -0.63 | 1.1 | 5.44 | 7 Down early and transient |
| A002437_01 | At1g75390 | bZIP transcription factor ATB2, putative; prote     | 0 | -1.30 | -0.47 | 1.2 | 2.11 | 7 Down early and transient |
| A002988_01 | At1g04220 | putative beta-ketoacyl-CoA synthase; protein i      | 0 | -1.64 | -0.44 | 1.2 | 5.44 | 7 Down early and transient |



|            |           |                                                   |   |       |       |     |      |                            |
|------------|-----------|---------------------------------------------------|---|-------|-------|-----|------|----------------------------|
| A004549_01 | xxxx      | b/t hypothetical protein; protein id: At1g30670.  | 0 | -1.62 | -0.72 | 2.6 | 0.05 | 7 Down early and transient |
| A005195_01 | At3g55440 | cytosolic triosephosphatisomerase; protein id:    | 0 | -1.26 | -0.81 | 1.6 | 0.36 | 7 Down early and transient |
| A006197_01 | At2g01610 | unknown protein; protein id: At2g01610.1          | 0 | -1.61 | 0.32  | 2.2 | 0.05 | 7 Down early and transient |
| A007428_01 | At2g16990 | putative tetracycline transporter protein; protei | 0 | -1.21 | -0.46 | 1.3 | 1.42 | 7 Down early and transient |
| A008753_01 | At2g41950 | hypothetical protein; protein id: At2g41950.1     | 0 | -1.35 | -0.75 | 1.5 | 0.47 | 7 Down early and transient |
| A009255_01 | At3g22240 | expressed protein; protein id: At3g22240.1        | 0 | -1.11 | -0.26 | 1.8 | 0.19 | 7 Down early and transient |
| A009949_01 | At3g54640 | tryptophan synthase alpha chain; protein id: A    | 0 | -1.35 | -0.75 | 1.5 | 0.60 | 7 Down early and transient |
| A010541_01 | At3g17070 | peroxidase, putative; protein id: At3g17070.1     | 0 | -1.39 | -0.33 | 1.4 | 0.75 | 7 Down early and transient |
| A011606_01 | At3g55120 | chalcone isomerase; protein id: At3g55120.1       | 0 | -2.09 | -1.12 | 2.3 | 0.05 | 7 Down early and transient |
| A014189_01 | At4g39210 | glucose-1-phosphate adenylyltransferase (AP       | 0 | -1.03 | -0.20 | 1.3 | 1.11 | 7 Down early and transient |
| A015356_01 | At4g30810 | A.t. putative transcription factor (MYB98) mRN    | 0 | -1.01 | -0.52 | 1.3 | 1.42 | 7 Down early and transient |
| A016536_01 | At5g47060 | putative protein; protein id: At5g47060.1         | 0 | -1.09 | 0.50  | 2.0 | 0.08 | 7 Down early and transient |
| A017452_01 | At5g09990 | expressed protein; protein id: At5g09990.1        | 0 | -1.46 | 0.13  | 1.2 | 2.11 | 7 Down early and transient |
| A018176_01 | At5g03760 | putative protein; protein id: At5g03760.1         | 0 | -1.11 | -0.54 | 1.4 | 1.11 | 7 Down early and transient |
| A018678_01 | At5g55560 | putative protein; protein id: At5g55560.1         | 0 | -1.10 | -0.50 | 1.4 | 1.11 | 7 Down early and transient |
| A019074_01 | At5g09570 | putative protein; protein id: At5g09570.1         | 0 | -1.22 | -0.73 | 1.1 | 5.44 | 7 Down early and transient |
| A019532_01 | At4g19690 | Fe(II) transport protein; protein id: At4g19690.  | 0 | -1.68 | -0.40 | 1.4 | 0.75 | 7 Down early and transient |
| A019650_01 | At5g55180 | glycosyl hydrolase family 17; protein id: At5g5   | 0 | -1.50 | -0.67 | 1.3 | 1.42 | 7 Down early and transient |
| A019843_01 | At2g38310 | expressed protein; protein id: At2g38310.1        | 0 | -1.45 | -0.83 | 1.7 | 0.23 | 7 Down early and transient |
| A019861_01 | At2g37470 | putative histone H2B; protein id: At2g37470.1     | 0 | -1.47 | -0.48 | 1.8 | 0.17 | 7 Down early and transient |
| A019942_01 | At1g07090 | expressed protein; protein id: At1g07090.1        | 0 | -1.14 | 0.01  | 1.2 | 5.44 | 7 Down early and transient |
| A020798_01 | At1g58280 | unknown protein; protein id: At1g58280.1          | 0 | -1.43 | -0.93 | 1.6 | 0.41 | 7 Down early and transient |
| A021223_01 | At2g17560 | putative HMG protein; protein id: At2g17560.1     | 0 | -1.15 | -0.64 | 1.2 | 2.11 | 7 Down early and transient |
| A021823_01 | At4g30810 | serine carboxypeptidase II - like protein; prote  | 0 | -1.25 | -0.77 | 1.7 | 0.27 | 7 Down early and transient |
| A022996_01 | At5g38690 | putative protein; protein id: At5g38690.1         | 0 | -1.02 | -0.46 | 1.1 | 5.44 | 7 Down early and transient |
| A023041_01 | At5g08570 | pyruvate kinase; protein id: At5g08570.1          | 0 | -1.14 | -0.74 | 1.9 | 0.08 | 7 Down early and transient |
| A024248_01 | At5g54670 | kinesin-like protein C (katC); protein id: At5g5  | 0 | -1.70 | -0.64 | 1.2 | 5.44 | 7 Down early and transient |
| A024485_01 | At1g22410 | 3-deoxy-D-arabino-heptulosonate 7-phosphat        | 0 | -1.33 | 0.02  | 1.7 | 0.27 | 7 Down early and transient |
| A025683_01 | At1g68740 | putative receptor protein; protein id: At1g6874   | 0 | -1.49 | 0.77  | 1.8 | 0.19 | 7 Down early and transient |
| A016527_01 | At5g56500 | rubisco subunit binding-protein beta subunit p    | 0 | -1.83 | -1.16 | 2.5 | 0.05 | 7 Down early and transient |
| A000031_01 | At1g19670 | expressed protein; protein id: At1g19670.1        | 0 | -0.22 | -1.78 | 2.3 | 0.05 | 8 Down late                |
| A000146_01 | At1g19850 | auxin response transcription factor; protein id:  | 0 | 0.33  | -1.44 | 1.9 | 0.08 | 8 Down late                |
| A000157_01 | At1g77060 | carboxyphosphoenolpyruvate mutase, puta           | 0 | -0.09 | -1.20 | 1.8 | 0.23 | 8 Down late                |
| A000406_01 | At1g32470 | glycine cleavage system H protein precursor,      | 0 | -0.06 | -1.17 | 1.6 | 0.47 | 8 Down late                |
| A000473_01 | At1g03710 | hypothetical protein; protein id: At1g03710.1     | 0 | -0.14 | -1.31 | 2.2 | 0.05 | 8 Down late                |
| A000548_01 | At1g19330 | expressed protein; protein id: At1g19330.1        | 0 | 0.32  | -1.17 | 1.7 | 0.23 | 8 Down late                |
| A000742_01 | At1g18450 | expressed protein; protein id: At1g18450.1        | 0 | 0.03  | -1.06 | 1.7 | 0.27 | 8 Down late                |
| A001098_01 | At1g35780 | expressed protein; protein id: At1g35780.1        | 0 | -0.22 | -1.70 | 2.4 | 0.05 | 8 Down late                |
| A001455_01 | At1g25260 | expressed protein; protein id: At1g25260.1        | 0 | -0.20 | -1.45 | 2.0 | 0.08 | 8 Down late                |
| A001679_01 | At1g55330 | arabinogalactan-protein (AGP21); protein id: A    | 0 | -0.26 | -2.43 | 3.1 | 0.05 | 8 Down late                |
| A002081_01 | At1g65960 | glutamate decarboxylase 2 (GAD 2); protein ic     | 0 | -0.28 | -1.57 | 2.7 | 0.05 | 8 Down late                |
| A002418_01 | At1g16705 | expressed protein; protein id: At1g16705.1        | 0 | 0.96  | -1.97 | 3.1 | 0.05 | 8 Down late                |
| A002741_01 | At1g72610 | germin-like protein; protein id: At1g72610.1      | 0 | -0.14 | -2.39 | 3.0 | 0.05 | 8 Down late                |
| A003547_01 | At1g71790 | actin capping protein beta-2, putative; protein   | 0 | -0.22 | -1.35 | 2.3 | 0.05 | 8 Down late                |
| A003698_01 | At1g30520 | hypothetical protein; protein id: At1g30520.1     | 0 | -0.06 | -1.38 | 2.8 | 0.05 | 8 Down late                |

|            |           |                                                                                  |   |       |       |     |      |             |
|------------|-----------|----------------------------------------------------------------------------------|---|-------|-------|-----|------|-------------|
| A004689_01 | At1g55260 | expressed protein; protein id: At1g55260.1                                       | 0 | -0.45 | -2.47 | 3.8 | 0.05 | 8 Down late |
| A004696_01 | At1g26150 | Pto kinase interactor, putative; protein id: At1g26150.1                         | 0 | -0.04 | -1.23 | 1.6 | 0.36 | 8 Down late |
| A004846_01 | At1g07570 | protein kinase APK1A; protein id: At1g07570.1                                    | 0 | -0.11 | -1.29 | 1.5 | 0.47 | 8 Down late |
| A005069_01 | At4g39660 | alanine:glyoxylate aminotransferase 2 homolog                                    | 0 | 0.08  | -1.23 | 1.5 | 0.47 | 8 Down late |
| A005075_01 | At1g23940 | gamma-adaptin, putative; protein id: At1g23940.1                                 | 0 | -0.34 | -2.52 | 1.4 | 0.75 | 8 Down late |
| A005208_01 | At1g60590 | polygalacturonase, putative; protein id: At1g60590.1                             | 0 | 1.00  | -1.99 | 2.4 | 0.05 | 8 Down late |
| A005354_01 | At3g41979 | 5SrRNA; protein id: At3g41979                                                    | 0 | -0.25 | -1.54 | 1.2 | 5.44 | 8 Down late |
| A005714_01 | At5g25460 | unknown protein                                                                  | 0 | -0.46 | -3.24 | 6.4 | 0.05 | 8 Down late |
| A005916_01 | xxxx      | b/t putative protein; protein id: At4g13490.1                                    | 0 | 0.17  | -1.19 | 1.5 | 0.47 | 8 Down late |
| A005946_01 | At1g76090 | S-adenosyl-methionine-sterol-C-methyltransferase                                 | 0 | 0.37  | -1.13 | 2.7 | 0.05 | 8 Down late |
| A006049_01 | At2g10940 | expressed protein; protein id: At2g10940.1                                       | 0 | -0.11 | -2.90 | 3.9 | 0.05 | 8 Down late |
| A006051_01 | At2g18020 | 60S ribosomal protein L2; protein id: At2g18020.1                                | 0 | -0.16 | -1.45 | 1.3 | 1.42 | 8 Down late |
| A006063_01 | At2g38530 | putative nonspecific lipid-transfer protein; protein id: At2g38530.1             | 0 | 0.39  | -2.22 | 2.3 | 0.05 | 8 Down late |
| A006181_01 | At2g14900 | similar to gibberellin-regulated proteins; protein id: At2g14900.1               | 0 | 0.36  | -1.80 | 4.0 | 0.05 | 8 Down late |
| A006824_01 | At2g33810 | putative squamosa-promoter binding protein; protein id: At2g33810.1              | 0 | 0.41  | -2.54 | 3.6 | 0.05 | 8 Down late |
| A007357_01 | At2g37190 | 60S ribosomal protein L12; protein id: At2g37190.1                               | 0 | -0.43 | -2.46 | 4.0 | 0.05 | 8 Down late |
| A007370_01 | At2g37270 | 40S ribosomal protein S5; protein id: At2g37270.1                                | 0 | 0.05  | -1.24 | 1.4 | 0.75 | 8 Down late |
| A007964_01 | At2g06850 | xyloglucan endotransglycosylase (ext/EXGT)-like protein; protein id: At2g06850.1 | 0 | -0.21 | -3.42 | 4.1 | 0.05 | 8 Down late |
| A007970_01 | At2g15090 | putative fatty acid elongase; protein id: At2g15090.1                            | 0 | 0.50  | -1.41 | 1.3 | 1.42 | 8 Down late |
| A008512_01 | At5g18380 | putative 40S ribosomal protein S16                                               | 0 | -0.08 | -1.53 | 1.8 | 0.23 | 8 Down late |
| A008601_01 | At2g03240 | unknown protein; protein id: At2g03240.1                                         | 0 | 0.31  | -1.73 | 3.8 | 0.05 | 8 Down late |
| A008649_01 | At2g40430 | expressed protein; protein id: At2g40430.1                                       | 0 | -0.07 | -1.34 | 1.2 | 2.11 | 8 Down late |
| A008881_01 | At3g02180 | expressed protein; protein id: At3g02180.1                                       | 0 | -0.30 | -1.76 | 3.6 | 0.05 | 8 Down late |
| A009037_01 | At3g62720 | alpha galactosyltransferase-like protein; protein id: At3g62720.1                | 0 | 0.32  | -1.11 | 2.0 | 0.08 | 8 Down late |
| A009148_01 | At3g16250 | putative 2Fe-2S iron-sulfur cluster protein; protein id: At3g16250.1             | 0 | 0.33  | -1.27 | 2.3 | 0.05 | 8 Down late |
| A009590_01 | At3g06550 | unknown protein; protein id: At3g06550.1                                         | 0 | -0.10 | -1.02 | 2.3 | 0.05 | 8 Down late |
| A009744_01 | At3g07460 | expressed protein; protein id: At3g07460.1                                       | 0 | -0.07 | -1.04 | 1.8 | 0.19 | 8 Down late |
| A010599_01 | At3g02080 | putative 40S ribosomal protein S19; protein id: At3g02080.1                      | 0 | 0.09  | -1.39 | 2.1 | 0.08 | 8 Down late |
| A010680_01 | At3g56610 | putative protein; protein id: At3g56610.1                                        | 0 | 0.54  | -2.83 | 1.5 | 0.60 | 8 Down late |
| A010708_01 | At3g57800 | putative protein; protein id: At3g57800.1                                        | 0 | 0.24  | -1.23 | 1.2 | 5.44 | 8 Down late |
| A010731_01 | At3g27690 | light harvesting chlorophyll A/B binding protein; protein id: At3g27690.1        | 0 | 1.05  | -1.73 | 1.5 | 0.47 | 8 Down late |
| A010898_01 | At3g53620 | inorganic pyrophosphatase -like protein; protein id: At3g53620.1                 | 0 | 0.43  | -1.07 | 2.0 | 0.08 | 8 Down late |
| A011190_01 | At3g55290 | oxidoreductase -like protein; protein id: At3g55290.1                            | 0 | 0.33  | -1.06 | 2.4 | 0.05 | 8 Down late |
| A011320_01 | At3g17150 | hypothetical protein; protein id: At3g17150.1                                    | 0 | 0.01  | -2.95 | 2.3 | 0.05 | 8 Down late |
| A011569_01 | At3g06130 | expressed protein; protein id: At3g06130.1                                       | 0 | -0.14 | -1.37 | 3.2 | 0.05 | 8 Down late |
| A011614_01 | At3g14240 | subtilisin-like serine protease; protein id: At3g14240.1                         | 0 | -0.31 | -2.53 | 3.3 | 0.05 | 8 Down late |
| A011722_01 | At3g46040 | cytoplasmic ribosomal protein S15a -like; protein id: At3g46040.1                | 0 | -0.11 | -1.31 | 2.8 | 0.05 | 8 Down late |
| A011766_01 | At3g23750 | receptor-like kinase, putative; protein id: At3g23750.1                          | 0 | 0.01  | -1.17 | 2.3 | 0.05 | 8 Down late |
| A012159_01 | At3g09950 | hypothetical protein; protein id: At3g09950.1                                    | 0 | 1.20  | -0.95 | 2.6 | 0.05 | 8 Down late |
| A012331_01 | At3g16240 | delta tonoplast integral protein (delta-TIP); protein id: At3g16240.1            | 0 | -0.03 | -2.98 | 5.2 | 0.05 | 8 Down late |
| A012371_01 | At3g55760 | putative protein; protein id: At3g55760.1                                        | 0 | -0.13 | -1.27 | 1.7 | 0.27 | 8 Down late |
| A012422_01 | At3g06380 | F-box containing tubby family protein; protein id: At3g06380.1                   | 0 | -0.06 | -1.14 | 1.4 | 1.11 | 8 Down late |
| A012633_01 | At3g16870 | GATA zinc finger protein; protein id: At3g16870.1                                | 0 | -0.11 | -1.11 | 1.7 | 0.27 | 8 Down late |
| A012748_01 | At3g48580 | xyloglucan endotransglycosylase, putative; protein id: At3g48580.1               | 0 | 1.48  | -2.20 | 2.7 | 0.05 | 8 Down late |
| A012813_01 | At3g19820 | cell elongation protein, Dwarf1; protein id: At3g19820.1                         | 0 | -0.44 | -2.89 | 3.7 | 0.05 | 8 Down late |

|            |           |                                                    |   |       |       |     |      |             |
|------------|-----------|----------------------------------------------------|---|-------|-------|-----|------|-------------|
| A012883_01 | At4g37870 | phosphoenolpyruvate carboxykinase (ATP) -li        | 0 | -0.21 | -1.50 | 1.7 | 0.23 | 8 Down late |
| A012889_01 | At4g13540 | putative protein; protein id: At4g13540.1          | 0 | 0.75  | -2.93 | 1.5 | 0.47 | 8 Down late |
| A013087_01 | At4g22670 | HSP associated protein like; protein id: At4g2:    | 0 | -0.06 | -1.12 | 1.5 | 0.60 | 8 Down late |
| A013188_01 | At4g08950 | putative phi-1-like phosphate-induced protein;     | 0 | 0.11  | -2.63 | 2.4 | 0.05 | 8 Down late |
| A013699_01 | At4g17560 | putative protein; protein id: At4g17560.1          | 0 | -0.22 | -1.31 | 1.5 | 0.47 | 8 Down late |
| A013733_01 | At4g22000 | expressed protein; protein id: At4g22000.1         | 0 | -0.24 | -1.44 | 2.6 | 0.05 | 8 Down late |
| A013903_01 | At4g31290 | unknown protein; protein id: At4g31290.1           | 0 | 0.40  | -1.90 | 4.3 | 0.05 | 8 Down late |
| A014068_01 | At4g23870 | putative protein                                   | 0 | 1.27  | -1.37 | 1.6 | 0.41 | 8 Down late |
| A014169_01 | At4g18910 | major intrinsic protein (MIP)- like; protein id: A | 0 | 0.65  | -1.08 | 2.3 | 0.05 | 8 Down late |
| A014310_01 | At4g39400 | brassinosteroid insensitive 1 gene (BR11); pro     | 0 | 0.17  | -1.87 | 3.0 | 0.05 | 8 Down late |
| A015109_01 | At4g35950 | rac-like GTP-binding protein, putative; protein    | 0 | -0.24 | -1.33 | 1.1 | 5.44 | 8 Down late |
| A015345_01 | At4g00870 | bHLH protein; protein id: At4g00870.1              | 0 | 0.35  | -3.08 | 3.5 | 0.05 | 8 Down late |
| A015877_01 | At5g55120 | putative protein; protein id: At5g55120.1          | 0 | 0.09  | -1.22 | 2.9 | 0.05 | 8 Down late |
| A015938_01 | At5g22500 | male sterility 2-like protein (emb CAA68191.1)     | 0 | 0.68  | -1.21 | 1.6 | 0.41 | 8 Down late |
| A016095_01 | At5g62190 | DEAD/DEAH box RNA helicase PRH75; prote            | 0 | 0.17  | -1.20 | 1.3 | 1.42 | 8 Down late |
| A016335_01 | At5g62670 | plasma membrane proton ATPase-like; protei         | 0 | -0.12 | -1.36 | 2.1 | 0.05 | 8 Down late |
| A016372_01 | At5g57110 | calcium-transporting ATPase; protein id: At5g:     | 0 | -0.06 | -1.52 | 1.9 | 0.11 | 8 Down late |
| A016673_01 | At5g54630 | putative protein; protein id: At5g54630.1          | 0 | 0.23  | -1.21 | 2.1 | 0.08 | 8 Down late |
| A017116_01 | At5g62390 | KED - like protein; protein id: At5g62390.1        | 0 | -0.11 | -1.63 | 2.1 | 0.08 | 8 Down late |
| A017195_01 | At5g24510 | 60s acidic ribosomal protein P1; protein id: At!   | 0 | 0.22  | -1.99 | 1.3 | 1.42 | 8 Down late |
| A017746_01 | At5g42680 | putative protein; protein id: At5g42680.1          | 0 | -0.21 | -1.30 | 1.8 | 0.19 | 8 Down late |
| A017815_01 | At4g13261 | hypothetical protein; protein id: At4g13261.1      | 0 | 1.01  | -2.94 | 2.5 | 0.05 | 8 Down late |
| A018300_01 | At5g08050 | putative protein; protein id: At5g08050.1          | 0 | 0.20  | -1.25 | 1.5 | 0.60 | 8 Down late |
| A018450_01 | At5g48490 | putative protein; protein id: At5g48490.1          | 0 | 0.66  | -2.27 | 4.5 | 0.05 | 8 Down late |
| A018711_01 | At5g44820 | putative protein; protein id: At5g44820.1          | 0 | 0.18  | -1.10 | 1.6 | 0.41 | 8 Down late |
| A018891_01 | At5g20630 | germin-like protein; protein id: At5g20630.1       | 0 | -0.27 | -4.53 | 1.6 | 0.36 | 8 Down late |
| A019002_01 | At5g22460 | putative protein; protein id: At5g22460.1          | 0 | 0.95  | -1.95 | 1.4 | 0.75 | 8 Down late |
| A019027_01 | At5g13980 | glycosyl hydrolase family 38 (alpha-mannosid:      | 0 | -0.01 | -1.52 | 1.7 | 0.27 | 8 Down late |
| A019186_01 | At5g13140 | putative protein; protein id: At5g13140.1          | 0 | -0.08 | -3.65 | 1.6 | 0.41 | 8 Down late |
| A019398_01 | At5g04430 | KH domain protein Nova, putative; protein id: .    | 0 | -0.05 | -1.29 | 1.6 | 0.41 | 8 Down late |
| A019580_01 | At4g01410 | synaptobrevin VAMP713; protein id: At4g0141        | 0 | 0.10  | -1.04 | 1.9 | 0.17 | 8 Down late |
| A019591_01 | At4g15440 | hydroperoxide lyase (HPOL) like protein; prote     | 0 | 0.08  | -1.91 | 2.9 | 0.05 | 8 Down late |
| A019718_01 | At5g53880 | expressed protein; protein id: At5g53880.1         | 0 | -0.27 | -2.04 | 2.7 | 0.05 | 8 Down late |
| A019934_01 | At3g16950 | dihydrolipoamide dehydrogenase, putative; pr       | 0 | -0.02 | -1.17 | 2.7 | 0.05 | 8 Down late |
| A020213_01 | At1g79990 | putative coatomer protein complex, subunit be      | 0 | -0.18 | -1.08 | 1.3 | 1.42 | 8 Down late |
| A020436_01 | At2g36930 | expressed protein; protein id: At2g36930.1         | 0 | 0.57  | -1.04 | 1.6 | 0.41 | 8 Down late |
| A020452_01 | At3g13520 | arabinogalactan-protein (AGP12); protein id: /     | 0 | -0.23 | -2.06 | 3.8 | 0.05 | 8 Down late |
| A020501_01 | At5g61440 | thioredoxin-like 3; protein id: At5g61440.1        | 0 | 0.64  | -2.40 | 3.6 | 0.05 | 8 Down late |
| A020559_01 | At3g60530 | GATA zinc finger protein; protein id: At3g6053     | 0 | -0.36 | -2.53 | 2.2 | 0.05 | 8 Down late |
| A020592_01 | At5g48480 | expressed protein; protein id: At5g48480.1         | 0 | -0.19 | -1.09 | 1.5 | 0.60 | 8 Down late |
| A020606_01 | At5g52920 | pyruvate kinase; protein id: At5g52920.1           | 0 | -0.09 | -1.20 | 1.6 | 0.36 | 8 Down late |
| A020754_01 | At3g02110 | putative serine carboxypeptidase II; protein id:   | 0 | -0.20 | -1.21 | 2.4 | 0.05 | 8 Down late |
| A020852_01 | At1g15930 | 40S ribosomal protein S12, putative; protein ic    | 0 | 0.07  | -1.17 | 1.6 | 0.41 | 8 Down late |
| A021026_01 | At5g65730 | xyloglucan endo-transglycosylase-like protein      | 0 | 0.74  | -1.60 | 2.7 | 0.05 | 8 Down late |
| A021040_01 | At4g21960 | peroxidase, putative; protein id: At4g21960.1      | 0 | -0.14 | -1.12 | 1.6 | 0.41 | 8 Down late |

|            |           |                                                    |   |       |       |     |      |             |
|------------|-----------|----------------------------------------------------|---|-------|-------|-----|------|-------------|
| A021074_01 | At1g03870 | fasciclin-like arabinogalactan-protein (FLA9); j   | 0 | 0.09  | -1.94 | 1.3 | 1.11 | 8 Down late |
| A021107_01 | At5g64680 | unknown protein; protein id: At5g64680.1           | 0 | -0.13 | -1.46 | 2.4 | 0.05 | 8 Down late |
| A021411_01 | At5g18020 | auxin-induced protein-like; protein id: At5g180    | 0 | 0.41  | -2.53 | 1.5 | 0.60 | 8 Down late |
| A021476_01 | At5g05590 | phosphoribosylanthranilate isomerase; proteir      | 0 | -0.14 | -1.20 | 2.5 | 0.05 | 8 Down late |
| A021749_01 | At1g29460 | auxin-induced protein, putative; protein id: At1   | 0 | 0.83  | -1.60 | 2.1 | 0.08 | 8 Down late |
| A021909_01 | At1g57860 | 60S ribosomal protein L21, putative; protein ic    | 0 | -0.21 | -1.34 | 2.0 | 0.08 | 8 Down late |
| A022020_01 | At1g30230 | elongation factor 1-beta, putative; protein id: A  | 0 | 0.16  | -1.13 | 1.4 | 1.11 | 8 Down late |
| A022043_01 | At1g74050 | putative 60S ribosomal protein L6; protein id: ,   | 0 | 0.10  | -1.43 | 1.5 | 0.60 | 8 Down late |
| A022164_01 | At3g51270 | putative protein; protein id: At3g51270.1          | 0 | -0.08 | -1.22 | 1.3 | 1.11 | 8 Down late |
| A022275_01 | At5g65700 | leucine-rich repeat transmembrane protein kir      | 0 | -0.12 | -1.32 | 2.1 | 0.08 | 8 Down late |
| A022689_01 | At3g56030 | putative protein; protein id: At3g56030.1          | 0 | 0.52  | -1.27 | 1.9 | 0.08 | 8 Down late |
| A023079_01 | At5g42230 | serine carboxypeptidase-II like; protein id: At5   | 0 | 0.08  | -2.38 | 3.9 | 0.05 | 8 Down late |
| A024104_01 | At1g17030 | hypothetical protein; protein id: At1g17030.1      | 0 | 0.19  | -2.23 | 1.4 | 1.11 | 8 Down late |
| A024174_01 | At5g24610 | putative protein; protein id: At5g24610.1          | 0 | -0.21 | -1.17 | 1.6 | 0.36 | 8 Down late |
| A024332_01 | At3g16180 | putative transport protein; protein id: At3g1618   | 0 | -0.41 | -2.97 | 4.2 | 0.05 | 8 Down late |
| A024353_01 | At4g20170 | putative protein; protein id: At4g20170.1          | 0 | 0.01  | -1.18 | 1.7 | 0.23 | 8 Down late |
| A024454_01 | At3g22120 | unknown protein; protein id: At3g22120.1           | 0 | 0.42  | -3.83 | 3.9 | 0.05 | 8 Down late |
| A024510_01 | At3g05490 | expressed protein; protein id: At3g05490.1         | 0 | -0.04 | -1.66 | 1.2 | 5.44 | 8 Down late |
| A024633_01 | At1g66180 | expressed protein; protein id: At1g66180.1         | 0 | -0.08 | -2.59 | 3.7 | 0.05 | 8 Down late |
| A024649_01 | At1g29670 | lipase/hydrolase, putative; protein id: At1g296    | 0 | 0.06  | -1.59 | 2.2 | 0.05 | 8 Down late |
| A024657_01 | At2g17360 | putative ribosomal protein S4; protein id: At2g    | 0 | -0.11 | -1.48 | 1.5 | 0.60 | 8 Down late |
| A024687_01 | At1g52190 | peptide transporter, putative; protein id: At1g5   | 0 | -0.34 | -2.33 | 2.9 | 0.05 | 8 Down late |
| A025844_01 | At1g15910 | transcriptional regulator, putative; protein id: A | 0 | -0.11 | -1.56 | 2.4 | 0.05 | 8 Down late |
| A008935_01 | At3g05910 | pectinacetylerase, putative; protein id: At3g      | 0 | 0.23  | -1.15 | 1.1 | 5.44 | 8 Down late |

**Table S4. Genes up-regulated from 0-1 to 2-3 DPA**

0-1 DPA to 2-3 DPA up-regulated genes based on 3% FDR 2-class SAM after technical replicas averaged and 2-fold change after biological replicas averaged. Normalized Log<sub>2</sub> (mean ratio relative to 0-1 DPA mean) and 3% FDR 2-class SAM Score (d) and q value are shown.

| Oligo ID   | AGI       | Annotation                                                                    | 0-1 DPA Mean | 2-3 DPA Mean | Score(d) SAM 2-class (FDR 3%) | q-value SAM 2-class (FDR 3%) |
|------------|-----------|-------------------------------------------------------------------------------|--------------|--------------|-------------------------------|------------------------------|
| A005155_01 | At1g28660 | expressed protein; protein id: At1g28660.1                                    | 0            | 3.78         | 2.5                           | 0.09                         |
| A002643_01 | At1g12010 | putative amino-cyclopropane-carboxylic acid oxidase (ACC oxida                | 0            | 3.77         | 2.4                           | 0.09                         |
| A020748_01 | At2g05540 | putative glycine-rich protein; protein id: At2g05540.1                        | 0            | 3.75         | 3.4                           | 0.09                         |
| A007797_01 | At2g32150 | putative hydrolase; protein id: At2g32150.1                                   | 0            | 3.64         | 3.4                           | 0.09                         |
| A008562_01 | At2g02990 | ribonuclease, RNS1; protein id: At2g02990.1                                   | 0            | 3.56         | 2.4                           | 0.09                         |
| A016034_01 | At5g50260 | AtCEP1; cysteine proteinase; protein id: At5g50260.1                          | 0            | 3.55         | 1.5                           | 1.00                         |
| A008873_01 | At3g04070 | NAM-like protein (no apical meristem); protein id: At3g04070.1                | 0            | 3.51         | 3.3                           | 0.09                         |
| A021719_01 | At2g01890 | putative purple acid phosphatase; protein id: At2g01890.1                     | 0            | 3.47         | 1.4                           | 1.29                         |
| A013095_01 | At4g02520 | glutathione transferase, putative; protein id: At4g02520.1                    | 0            | 3.46         | 2.9                           | 0.09                         |
| A024259_01 | At3g48340 | AtCEP2; cysteine proteinase; protein id: At3g48340.1                          | 0            | 3.46         | 3.1                           | 0.09                         |
| A017284_01 | At5g40690 | putative protein; protein id: At5g40690.1                                     | 0            | 3.36         | 2.7                           | 0.09                         |
| A013676_01 | At4g35690 | putative protein; protein id: At4g35690.1                                     | 0            | 3.33         | 2.4                           | 0.09                         |
| A014758_01 | At4g35770 | senescence-associated protein sen1; protein id: At4g35770.1                   | 0            | 3.33         | 2.4                           | 0.09                         |
| A020731_01 | At2g40000 | putative nematode-resistance protein; protein id: At2g40000.1                 | 0            | 3.31         | 2.4                           | 0.09                         |
| A006010_01 | At2g37130 | peroxidase, putative (ATP2a); protein id: At2g37130.1                         | 0            | 3.29         | 4.4                           | 0.09                         |
| A005727_01 | At3g47340 | glutamine-dependent asparagine synthetase; protein id: At3g473-               | 0            | 3.28         | 3.8                           | 0.09                         |
| A012430_01 | At3g59270 | putative protein; protein id: At3g59270.1                                     | 0            | 3.26         | 3.0                           | 0.09                         |
| A020847_01 | At1g10070 | tat-binding protein, putative; protein id: At1g10070.1                        | 0            | 3.25         | 3.2                           | 0.09                         |
| A006087_01 | At2g20670 | expressed protein; protein id: At2g20670.1                                    | 0            | 3.25         | 2.7                           | 0.09                         |
| A007696_01 | At2g39400 | putative phospholipase; protein id: At2g39400.1                               | 0            | 3.23         | 2.3                           | 0.09                         |
| A000061_01 | At1g76590 | expressed protein; protein id: At1g76590.1                                    | 0            | 3.20         | 3.4                           | 0.09                         |
| A008712_01 | At2g31945 | expressed protein; protein id: At2g31945.1                                    | 0            | 3.19         | 2.2                           | 0.09                         |
| A013697_01 | At4g15610 | expressed protein; protein id: At4g15610.1                                    | 0            | 3.16         | 4.0                           | 0.09                         |
| A002409_01 | At1g16950 | hypothetical protein; protein id: At1g16950.1                                 | 0            | 3.16         | 2.4                           | 0.09                         |
| A017612_01 | At5g57550 | xyloglucan endotransglycosylase (XTR3); protein id: At5g57550.1               | 0            | 3.11         | 1.4                           | 1.29                         |
| A007362_01 | At2g33830 | auxin-regulated protein; protein id: At2g33830.1                              | 0            | 3.11         | 3.7                           | 0.09                         |
| A020560_01 | At3g47340 | glutamine-dependent asparagine synthetase; protein id: At3g473-               | 0            | 3.09         | 4.1                           | 0.09                         |
| A008415_01 | At2g18550 | homeodomain protein; protein id: At2g18550.1                                  | 0            | 3.08         | 2.0                           | 0.09                         |
| A019874_01 | At2g01890 | putative purple acid phosphatase; protein id: At2g01890.1                     | 0            | 3.08         | 2.4                           | 0.09                         |
| A021921_01 | At4g38540 | monooxygenase 2 (MO2); protein id: At4g38540.1                                | 0            | 3.08         | 1.4                           | 1.00                         |
| A021759_01 | At1g70680 | Ca <sup>2+</sup> -binding EF-hand common family protein, putative; protein ic | 0            | 3.08         | 4.5                           | 0.09                         |
| A007977_01 | At2g18050 | histone H1; protein id: At2g18050.1                                           | 0            | 3.03         | 3.1                           | 0.09                         |
| A002917_01 | At1g68620 | expressed protein; protein id: At1g68620.1                                    | 0            | 3.00         | 2.5                           | 0.09                         |
| A004612_01 | At1g67860 | expressed protein; protein id: At1g67860.1                                    | 0            | 2.98         | 2.9                           | 0.09                         |
| A011912_01 | At3g45300 | isovaleryl-CoA-dehydrogenase precursor (IVD); protein id: At3g44              | 0            | 2.96         | 3.7                           | 0.09                         |

|            |           |                                                                             |   |      |     |      |
|------------|-----------|-----------------------------------------------------------------------------|---|------|-----|------|
| A005729_01 | At2g25625 | auxin-regulated protein; protein id: At2g25625.1                            | 0 | 2.94 | 1.8 | 0.39 |
| A001155_01 | At1g69490 | expressed protein; protein id: At1g69490.1                                  | 0 | 2.92 | 1.8 | 0.39 |
| A005751_01 | At4g37520 | peroxidase, putative; protein id: At4g37520.1                               | 0 | 2.92 | 4.2 | 0.09 |
| A021133_01 | At1g11190 | bifunctional nuclease bfn1; protein id: At1g11190.1                         | 0 | 2.90 | 2.7 | 0.09 |
| A025060_01 | At3g44300 | nitrilase 2; protein id: At3g44300.1                                        | 0 | 2.89 | 2.5 | 0.09 |
| A014867_01 | At4g36740 | homeodomain protein; protein id: At4g36740.1                                | 0 | 2.89 | 2.2 | 0.09 |
| A007656_01 | At2g44130 | expressed protein; protein id: At2g44130.1                                  | 0 | 2.89 | 2.5 | 0.09 |
| A006919_01 | At2g46950 | cytochrome p450, putative; protein id: At2g46950.1                          | 0 | 2.87 | 2.9 | 0.09 |
| A024298_01 | At4g30270 | xyloglucan endotransglycosylase (meri5B); protein id: At4g30270             | 0 | 2.87 | 2.3 | 0.09 |
| A004276_01 | At1g03660 | unknown; protein id: At1g03660.1                                            | 0 | 2.84 | 4.0 | 0.09 |
| A003084_01 | At1g05340 | expressed protein; protein id: At1g05340.1                                  | 0 | 2.81 | 3.0 | 0.09 |
| A007820_01 | At2g14560 | unknown protein; protein id: At2g14560.1                                    | 0 | 2.80 | 1.3 | 2.22 |
| A012812_01 | At3g47950 | H <sup>+</sup> -transporting ATPase - like protein; protein id: At3g47950.1 | 0 | 2.80 | 2.3 | 0.09 |
| A020605_01 | At2g25450 | putative dioxygenase; protein id: At2g25450.1                               | 0 | 2.79 | 2.7 | 0.09 |
| A024326_01 | At5g56870 | glycosyl hydrolase family 35 (beta-galactosidase); protein id: At5g         | 0 | 2.78 | 3.1 | 0.09 |
| A015558_01 | At5g10650 | Pspzf zinc finger protein - like; protein id: At5g10650.1                   | 0 | 2.78 | 4.9 | 0.09 |
| A014791_01 | At4g27450 | unknown protein; protein id: At4g27450                                      | 0 | 2.76 | 2.9 | 0.09 |
| A020350_01 | At3g15500 | putative jasmonic acid regulatory protein; protein id: At3g15500.1          | 0 | 2.75 | 2.4 | 0.09 |
| A024527_01 | At1g75750 | expressed protein; protein id: At1g75750.1                                  | 0 | 2.74 | 3.5 | 0.09 |
| A008391_01 | At2g05910 | unknown protein; protein id: At2g05910.1                                    | 0 | 2.73 | 1.4 | 1.50 |
| A014115_01 | At4g28040 | Medicago nodulin N21-like protein; protein id: At4g28040.1                  | 0 | 2.70 | 2.5 | 0.09 |
| A016446_01 | At5g45890 | senescence-specific cysteine protease SAG12; protein id: At5g45             | 0 | 2.69 | 1.9 | 0.39 |
| A014526_01 | At4g14930 | expressed protein; protein id: At4g14930.1                                  | 0 | 2.68 | 2.4 | 0.09 |
| A016148_01 | At5g49360 | xylosidase glycosyl hydrolase family 3; protein id: At5g49360.1             | 0 | 2.68 | 2.6 | 0.09 |
| A007535_01 | At2g15960 | expressed protein; protein id: At2g15960.1                                  | 0 | 2.67 | 5.2 | 0.09 |
| A000827_01 | At1g80160 | expressed protein; protein id: At1g80160.1                                  | 0 | 2.67 | 2.8 | 0.09 |
| A017913_01 | At5g63800 | glycosyl hydrolase family 35 (beta-galactosidase); protein id: At5g         | 0 | 2.66 | 1.3 | 2.13 |
| A009011_01 | At3g22640 | expressed protein; protein id: At3g22640.1                                  | 0 | 2.64 | 2.7 | 0.09 |
| A025898_01 | At1g78830 | expressed protein; protein id: At1g78830.1,                                 | 0 | 2.63 | 1.1 | 2.59 |
| A012369_01 | At3g44240 | CCR4-associated factor 1-like protein; protein id: At3g44240.1              | 0 | 2.63 | 1.4 | 1.50 |
| A014688_01 | At4g37610 | putative protein; protein id: At4g37610.1                                   | 0 | 2.61 | 2.2 | 0.09 |
| A017977_01 | At5g01520 | putative protein; protein id: At5g01520.1                                   | 0 | 2.58 | 4.6 | 0.09 |
| A016324_01 | At5g39610 | NAM / CUC2 - like protein; protein id: At5g39610.1                          | 0 | 2.57 | 2.0 | 0.16 |
| A012865_01 | At4g19420 | pectinacetylesterase family; protein id: At4g19420.1                        | 0 | 2.56 | 3.4 | 0.09 |
| A018019_01 | At5g14740 | carbonic anhydrase 2; protein id: At5g14740.1                               | 0 | 2.55 | 3.7 | 0.09 |
| A004618_01 | At1g11260 | glucose transporter; protein id: At1g11260.1                                | 0 | 2.55 | 2.5 | 0.09 |
| A018159_01 | At5g24160 | squalene monooxygenase 1,2 (squalene epoxidase 1,2) (SQP1,2                 | 0 | 2.55 | 4.4 | 0.09 |
| A000828_01 | At1g80180 | expressed protein; protein id: At1g80180.1                                  | 0 | 2.54 | 2.5 | 0.09 |
| A025575_01 | At1g02660 | expressed protein; protein id: At1g02660.1                                  | 0 | 2.53 | 1.3 | 1.72 |
| A005042_01 | At4g15760 | monooxygenase 1 (MO1), putative; protein id: At4g15760.1                    | 0 | 2.52 | 1.4 | 1.50 |
| A011810_01 | At3g04720 | hevein-like protein precursor (PR-4); protein id: At3g04720.1               | 0 | 2.52 | 4.1 | 0.09 |
| A001121_01 | At1g58180 | carbonic anhydrase, putative; protein id: At1g58180.1                       | 0 | 2.51 | 3.5 | 0.09 |
| A000410_01 | At1g02610 | hypothetical protein; protein id: At1g02610.1                               | 0 | 2.49 | 2.7 | 0.09 |
| A011130_01 | At3g14280 | unknown protein; protein id: At3g14280.1                                    | 0 | 2.45 | 2.8 | 0.09 |
| A011198_01 | At3g60140 | glycosyl hydrolase family 1, beta-glucosidase; protein id: At3g601          | 0 | 2.44 | 2.2 | 0.09 |

|            |           |                                                                                 |   |      |     |      |
|------------|-----------|---------------------------------------------------------------------------------|---|------|-----|------|
| A013034_01 | At4g10910 | expressed protein; protein id: At4g10910.1                                      | 0 | 2.43 | 3.0 | 0.09 |
| A025798_01 | At1g12780 | uridine diphosphate glucose epimerase; protein id: At1g12780.1                  | 0 | 2.43 | 3.1 | 0.09 |
| A004223_01 | At1g09500 | putative cinnamyl alcohol dehydrogenase; protein id: At1g09500.1                | 0 | 2.43 | 1.3 | 2.22 |
| A006885_01 | At2g02710 | putative receptor-like protein kinase; protein id: At2g02710.1                  | 0 | 2.42 | 2.4 | 0.09 |
| A016319_01 | At5g44610 | expressed protein                                                               | 0 | 2.41 | 3.2 | 0.09 |
| A014855_01 | At4g34320 | hypothetical protein common family; protein id: At4g34320.1                     | 0 | 2.41 | 2.2 | 0.09 |
| A001451_01 | At1g21400 | branched-chain alpha keto-acid dehydrogenase, putative; protein id: At1g21400.1 | 0 | 2.37 | 2.4 | 0.09 |
| A018348_01 | At5g56550 | putative protein; protein id: At5g56550.1                                       | 0 | 2.37 | 2.3 | 0.09 |
| A018673_01 | At5g01920 | putative protein; protein id: At5g01920.1                                       | 0 | 2.36 | 3.2 | 0.09 |
| A024469_01 | At5g59820 | zinc finger protein Zat12; protein id: At5g59820.1                              | 0 | 2.35 | 1.3 | 1.72 |
| A017468_01 | At5g25280 | serine-rich protein; protein id: At5g25280.1                                    | 0 | 2.35 | 2.4 | 0.09 |
| A005366_01 | At5g20250 | glycosyl hydrolase family 36; protein id: At5g20250.1                           | 0 | 2.35 | 2.2 | 0.09 |
| A000098_01 | xxxx      | b/t hypothetical protein; protein id: At1g12450 and leucine-rich repeat         | 0 | 2.35 | 1.3 | 1.72 |
| A007336_01 | At2g28400 | hypothetical protein; protein id: At2g28400.1                                   | 0 | 2.34 | 2.1 | 0.09 |
| A022000_01 | At5g56540 | arabinogalactan-protein (AGP14); protein id: At5g56540.1                        | 0 | 2.33 | 2.1 | 0.09 |
| A014702_01 | At4g33050 | putative protein; protein id: At4g33050.1                                       | 0 | 2.32 | 3.2 | 0.09 |
| A025759_01 | At2g22980 | putative serine carboxypeptidase I; protein id: At2g22980.1                     | 0 | 2.32 | 1.9 | 0.39 |
| A021890_01 | At4g11360 | RING-H2 finger protein RHA1b; protein id: At4g11360.1                           | 0 | 2.29 | 2.9 | 0.09 |
| A002676_01 | At1g61810 | glycosyl hydrolase family 1; protein id: At1g61810.1                            | 0 | 2.29 | 3.4 | 0.09 |
| A007750_01 | At2g33480 | putative NAM (no apical meristem)-like protein; protein id: At2g33480.1         | 0 | 2.28 | 2.4 | 0.09 |
| A020777_01 | At2g44500 | similar to axi 1 protein from Nicotiana tabacum; protein id: At2g44500.1        | 0 | 2.27 | 2.9 | 0.09 |
| A021629_01 | At2g32210 | expressed protein; protein id: At2g32210.1                                      | 0 | 2.26 | 3.1 | 0.09 |
| A008854_01 | At2g29470 | glutathione transferase, putative; protein id: At2g29470.2                      | 0 | 2.25 | 1.7 | 0.67 |
| A001303_01 | At1g15670 | expressed protein; protein id: At1g15670.1                                      | 0 | 2.25 | 2.7 | 0.09 |
| A023279_01 | At4g04750 | putative sugar transporter; protein id: At4g04750.1                             | 0 | 2.25 | 1.2 | 2.22 |
| A024336_01 | At3g48360 | putative protein; protein id: At3g48360.1                                       | 0 | 2.25 | 1.2 | 2.22 |
| A014066_01 | At4g23880 | hypothetical protein; protein id: At4g23880.1                                   | 0 | 2.24 | 2.7 | 0.09 |
| A021670_01 | At1g13990 | expressed protein; protein id: At1g13990.1                                      | 0 | 2.23 | 4.5 | 0.09 |
| A024560_01 | At5g61600 | DNA binding protein - like; protein id: At5g61600.1                             | 0 | 2.23 | 3.7 | 0.09 |
| A008692_01 | At2g15890 | expressed protein; protein id: At2g15890.1                                      | 0 | 2.22 | 1.9 | 0.39 |
| A011193_01 | At3g22060 | receptor kinase common family, putative; protein id: At3g22060.1                | 0 | 2.22 | 4.8 | 0.09 |
| A011819_01 | At3g61890 | homeobox-leucine zipper protein ATHB-12; protein id: At3g61890.1                | 0 | 2.21 | 1.8 | 0.39 |
| A020317_01 | At4g27410 | putative protein; protein id: At4g27410.2                                       | 0 | 2.20 | 2.0 | 0.09 |
| A004704_01 | At1g28330 | dormancy-associated protein, putative; protein id: At1g28330.1                  | 0 | 2.20 | 2.5 | 0.09 |
| A014097_01 | At4g22920 | expressed protein; protein id: At4g22920.1                                      | 0 | 2.19 | 2.2 | 0.09 |
| A006161_01 | At2g43820 | putative glucosyltransferase; protein id: At2g43820.1                           | 0 | 2.19 | 1.3 | 2.13 |
| A001970_01 | At1g06570 | 4-hydroxyphenylpyruvate dioxygenase (HPD); protein id: At1g06570.1              | 0 | 2.18 | 2.9 | 0.09 |
| A003186_01 | At1g67070 | phosphomannose isomerase, putative; protein id: At1g67070.1                     | 0 | 2.18 | 4.1 | 0.09 |
| A021811_01 | At1g80920 | J8-like protein; protein id: At1g80920.1                                        | 0 | 2.18 | 2.2 | 0.09 |
| A010307_01 | At3g26165 | pseudogene, cytochrome P450 At3g26165                                           | 0 | 2.18 | 2.8 | 0.09 |
| A005246_01 | At1g02660 | expressed protein; protein id: At1g02660.1                                      | 0 | 2.17 | 2.8 | 0.09 |
| A021882_01 | At5g14180 | putative protein; protein id: At5g14180.1                                       | 0 | 2.17 | 1.2 | 2.38 |
| A013535_01 | At4g14020 | expressed protein; protein id: At4g14020.1                                      | 0 | 2.17 | 1.5 | 0.99 |
| A012754_01 | At3g13750 | glycosyl hydrolase family 35 (beta-galactosidase); protein id: At3g13750.1      | 0 | 2.17 | 2.4 | 0.09 |
| A006022_01 | At4g20260 | endomembrane-associated protein; protein id: At4g20260.1                        | 0 | 2.17 | 2.1 | 0.09 |

|            |               |                                                                            |   |      |     |      |
|------------|---------------|----------------------------------------------------------------------------|---|------|-----|------|
| A020221_01 | At3g10740     | glycosyl hydrolase family 51; protein id: At3g10740.1                      | 0 | 2.17 | 3.0 | 0.09 |
| A002698_01 | At1g54740     | hypothetical protein; protein id: At1g54740.1                              | 0 | 2.16 | 1.3 | 2.13 |
| A013240_01 | At4g10920     | putative protein; protein id: At4g10920.1                                  | 0 | 2.16 | 5.3 | 0.09 |
| A020580_01 | At4g34230     | cinnamyl alcohol dehydrogenase - like protein; protein id: At4g34230.1     | 0 | 2.16 | 2.0 | 0.09 |
| A004437_01 | At1g80440     | expressed protein; protein id: At1g80440.1                                 | 0 | 2.13 | 2.0 | 0.09 |
| A008722_01 | At2g18700     | putative trehalose-6-phosphate synthase; protein id: At2g18700.1           | 0 | 2.13 | 2.7 | 0.09 |
| A014892_01 | At4g37310     | cytochrome P450-like protein                                               | 0 | 2.13 | 1.3 | 2.13 |
| A010318_01 | At3g51730     | putative protein; protein id: At3g51730.1                                  | 0 | 2.12 | 2.4 | 0.09 |
| A006021_01 | not annotated | EST ethylene-responsive element binding protein.(by NCBI blast)            | 0 | 2.12 | 2.4 | 0.09 |
| A020803_01 | At4g37520     | peroxidase, putative; protein id: At4g37520.1                              | 0 | 2.11 | 4.4 | 0.09 |
| A022381_01 | At4g27260     | GH3 like protein; protein id: At4g27260.1                                  | 0 | 2.11 | 2.5 | 0.09 |
| A000319_01 | At1g26820     | ribonuclease, RNS3; protein id: At1g26820.1                                | 0 | 2.11 | 2.4 | 0.09 |
| A021942_01 | At1g13990     | expressed protein; protein id: At1g13990.1                                 | 0 | 2.10 | 2.8 | 0.09 |
| A020615_01 | At1g61820     | glycosyl hydrolase family 1; protein id: At1g61820.1                       | 0 | 2.10 | 1.2 | 2.38 |
| A003510_01 | At1g10140     | expressed protein; protein id: At1g10140.1                                 | 0 | 2.09 | 3.0 | 0.09 |
| A021814_01 | At2g43820     | putative glucosyltransferase; protein id: At2g43820.1                      | 0 | 2.09 | 2.4 | 0.09 |
| A008605_01 | At2g22990     | putative serine carboxypeptidase I; protein id: At2g22990.1                | 0 | 2.09 | 2.4 | 0.09 |
| A020589_01 | At5g65210     | bZIP transcription factor, TGA1; protein id: At5g65210.1                   | 0 | 2.08 | 2.7 | 0.09 |
| A009906_01 | At3g06420     | AtAPG8h; expressed protein; protein id: At3g06420.1                        | 0 | 2.07 | 2.4 | 0.09 |
| A020617_01 | At1g54100     | aldehyde dehydrogenase homolog, putative; protein id: At1g54100.1          | 0 | 2.07 | 2.6 | 0.09 |
| A011932_01 | At3g61930     | hypothetical protein; protein id: At3g61930.1                              | 0 | 2.07 | 2.9 | 0.09 |
| A024495_01 | At2g27500     | glycosyl hydrolase family 17; protein id: At2g27500.1                      | 0 | 2.05 | 1.3 | 2.22 |
| A006799_01 | At2g23430     | Kip-related protein 1; protein id: At2g23430.1                             | 0 | 2.05 | 1.3 | 2.13 |
| A007304_01 | At2g37540     | putative oxidoreductase; protein id: At2g37540.1                           | 0 | 2.04 | 1.2 | 2.59 |
| A023537_01 | At2g36800     | putative glucosyl transferase; protein id: At2g36800.1                     | 0 | 2.04 | 1.3 | 2.22 |
| A015540_01 | At5g53730     | hairpin-induced protein, putative (HIN1); protein id: At5g53730.1          | 0 | 2.03 | 2.2 | 0.09 |
| A017335_01 | At5g10770     | nucleoid DNA-binding protein cnd41 - like protein; protein id: At5g10770.1 | 0 | 2.03 | 1.4 | 1.50 |
| A020869_01 | At5g54080     | homogentisate 1,2-dioxygenase; protein id: At5g54080.1                     | 0 | 2.03 | 2.6 | 0.09 |
| A021067_01 | At1g69890     | expressed protein; protein id: At1g69890.1                                 | 0 | 2.03 | 4.0 | 0.09 |
| A003475_01 | At1g80920     | J8-like protein; protein id: At1g80920.1                                   | 0 | 2.03 | 3.0 | 0.09 |
| A024360_01 | At1g15380     | expressed protein; protein id: At1g15380.1                                 | 0 | 2.02 | 2.8 | 0.09 |
| A016369_01 | At5g49450     | bZIP family transcription factor; protein id: At5g49450.1                  | 0 | 2.02 | 3.4 | 0.09 |
| A016359_01 | At5g09440     | putative protein; protein id: At5g09440.1                                  | 0 | 2.02 | 1.9 | 0.16 |
| A020242_01 | At4g36850     | putative protein; protein id: At4g36850.1                                  | 0 | 2.02 | 2.3 | 0.09 |
| A008459_01 | At2g45210     | putative auxin-regulated protein; protein id: At2g45210.1                  | 0 | 2.01 | 2.5 | 0.09 |
| A006975_01 | At2g46680     | homeodomain transcription factor (ATHB-7); protein id: At2g46680.1         | 0 | 2.01 | 2.4 | 0.09 |
| A001631_01 | At1g35910     | trehalose-phosphatase, putative; protein id: At1g35910.1                   | 0 | 2.01 | 1.6 | 0.76 |
| A003093_01 | At1g17700     | hypothetical protein; protein id: At1g17700.1                              | 0 | 2.01 | 1.3 | 2.22 |
| A021562_01 | At1g13990     | expressed protein; protein id: At1g13990.1                                 | 0 | 2.00 | 2.6 | 0.09 |
| A001180_01 | At1g70290     | trehalose-6-phosphate synthase, putative; protein id: At1g70290.1          | 0 | 2.00 | 3.0 | 0.09 |
| A015263_01 | At4g01870     | hypothetical protein; protein id: At4g01870.1                              | 0 | 2.00 | 1.1 | 2.76 |
| A009848_01 | At3g02140     | expressed protein; protein id: At3g02140.1                                 | 0 | 2.00 | 3.2 | 0.09 |
| A000124_01 | At1g23040     | expressed protein; protein id: At1g23040.1                                 | 0 | 1.99 | 2.0 | 0.09 |
| A012655_01 | At3g23970     | hypothetical protein; protein id: At3g23970.1                              | 0 | 1.99 | 3.4 | 0.09 |
| A021065_01 | At2g37130     | peroxidase, putative (ATP2a); protein id: At2g37130.1                      | 0 | 1.99 | 2.7 | 0.09 |



|            |           |                                                                                    |   |      |     |      |
|------------|-----------|------------------------------------------------------------------------------------|---|------|-----|------|
| A018066_01 | At5g61820 | putative protein; protein id: At5g61820.1                                          | 0 | 1.98 | 3.1 | 0.09 |
| A016364_01 | At5g48180 | unknown protein                                                                    | 0 | 1.97 | 1.9 | 0.31 |
| A013995_01 | At4g24230 | putative protein; protein id: At4g24230.1                                          | 0 | 1.97 | 3.1 | 0.09 |
| A000382_01 | At1g11080 | serine carboxypeptidase isolog; protein id: At1g11080.1                            | 0 | 1.97 | 2.8 | 0.09 |
| A020400_01 | At3g15630 | expressed protein; protein id: At3g15630.1                                         | 0 | 1.97 | 2.9 | 0.09 |
| A014984_01 | At4g05070 | coded for by A. thaliana cDNA T44741; protein id: At4g05070.1                      | 0 | 1.96 | 3.0 | 0.09 |
| A006104_01 | At2g05520 | putative glycine-rich protein; protein id: At2g05520.1                             | 0 | 1.96 | 3.7 | 0.09 |
| A004587_01 | At1g78670 | gamma glutamyl hydrolase, putative; protein id: At1g78670.1                        | 0 | 1.95 | 3.4 | 0.09 |
| A020588_01 | At3g60690 | putative protein; protein id: At3g60690.1                                          | 0 | 1.95 | 2.9 | 0.09 |
| A009187_01 | At3g28270 | At14a; protein id: At3g28270.1                                                     | 0 | 1.95 | 1.7 | 0.67 |
| A018934_01 | At5g58410 | unknown protein; protein id: At5g58410.1                                           | 0 | 1.95 | 4.0 | 0.09 |
| A015634_01 | At5g40780 | amino acid permease; protein id: At5g40780.1                                       | 0 | 1.95 | 2.6 | 0.09 |
| A004243_01 | At1g26800 | expressed protein; protein id: At1g26800.1                                         | 0 | 1.94 | 2.1 | 0.09 |
| A021628_01 | At2g32190 | expressed protein; protein id: At2g32190.1                                         | 0 | 1.93 | 2.5 | 0.09 |
| A021851_01 | At5g44580 | expressed protein; protein id: At5g44580.1                                         | 0 | 1.93 | 2.2 | 0.09 |
| A015984_01 | At5g40450 | putative protein; protein id: At5g40450.1                                          | 0 | 1.93 | 2.4 | 0.09 |
| A003989_01 | At1g11210 | expressed protein; protein id: At1g11210.1                                         | 0 | 1.93 | 3.3 | 0.09 |
| A019892_01 | At1g78290 | serine-threonine protein kinase, putative; protein id: At1g78290.1                 | 0 | 1.92 | 2.2 | 0.09 |
| A018058_01 | At5g66170 | senescence-associated protein; protein id: At5g66170.1                             | 0 | 1.92 | 2.9 | 0.09 |
| A024349_01 | At1g72900 | disease resistance protein (TIR-NBS class), putative; protein id: A                | 0 | 1.92 | 2.1 | 0.09 |
| A007859_01 | At2g45040 | putative metalloproteinase; protein id: At2g45040.1                                | 0 | 1.91 | 1.2 | 2.22 |
| A014469_01 | At4g28490 | leucine-rich repeat transmembrane protein kinase, putative; prote                  | 0 | 1.91 | 2.2 | 0.09 |
| A010383_01 | At3g45010 | carboxypeptidase precursor-like protein; protein id: At3g45010.1                   | 0 | 1.91 | 1.8 | 0.39 |
| A001567_01 | At1g07040 | expressed protein; protein id: At1g07040.1                                         | 0 | 1.90 | 2.5 | 0.09 |
| A002143_01 | At1g30040 | unknown protein; protein id: At1g30040.1                                           | 0 | 1.90 | 1.1 | 2.76 |
| A019812_01 | At3g51860 | Ca <sup>2+</sup> /H <sup>+</sup> -exchanging protein-like; protein id: At3g51860.1 | 0 | 1.90 | 2.3 | 0.09 |
| A002008_01 | At1g47960 | expressed protein; protein id: At1g47960.1                                         | 0 | 1.90 | 1.9 | 0.16 |
| A008578_01 | At2g38400 | putative beta-alanine-pyruvate aminotransferase; protein id: At2g                  | 0 | 1.90 | 2.7 | 0.09 |
| A021052_01 | At2g34430 | photosystem II type I chlorophyll a /b binding protein; protein id: A              | 0 | 1.90 | 1.2 | 2.59 |
| A016652_01 | At5g18130 | putative protein; protein id: At5g18130.1                                          | 0 | 1.89 | 2.1 | 0.09 |
| A019895_01 | At1g44800 | nodulin protein, putative; protein id: At1g44800.1                                 | 0 | 1.89 | 1.3 | 2.13 |
| A019507_01 | At4g28530 | NAM / CUC2 -like protein; protein id: At4g28530.1                                  | 0 | 1.89 | 1.2 | 2.22 |
| A019174_01 | At5g54730 | putative protein; protein id: At5g54730.1                                          | 0 | 1.89 | 2.8 | 0.09 |
| A004859_01 | At1g66760 | MATE efflux family protein, putative; protein id: At1g66760.2                      | 0 | 1.88 | 1.2 | 2.59 |
| A022735_01 | At3g31390 | hypothetical protein; protein id: At3g31390.1                                      | 0 | 1.88 | 1.8 | 0.39 |
| A012256_01 | At3g10320 | unknown protein; protein id: At3g10320.1                                           | 0 | 1.88 | 2.0 | 0.16 |
| A003266_01 | At1g55920 | serine acetyltransferase; protein id: At1g55920.1                                  | 0 | 1.88 | 1.2 | 2.38 |
| A019611_01 | At5g02230 | putative protein; protein id: At5g02230.1                                          | 0 | 1.88 | 2.0 | 0.09 |
| A001250_01 | At1g03090 | putative 3-methylcrotonyl-CoA carboxylase; protein id: At1g03090                   | 0 | 1.87 | 3.8 | 0.09 |
| A018625_01 | At5g12400 | putative protein; protein id: At5g12400.1                                          | 0 | 1.87 | 2.3 | 0.09 |
| A021109_01 | At5g53970 | putative tyrosine aminotransferase                                                 | 0 | 1.86 | 1.2 | 2.59 |
| A014858_01 | At4g33666 | expressed protein; protein id: At4g33666.1                                         | 0 | 1.86 | 4.4 | 0.09 |
| A001254_01 | At1g18270 | unknown protein; protein id: At1g18270.1                                           | 0 | 1.86 | 2.5 | 0.09 |
| A020515_01 | At5g58350 | MAP kinase; protein id: At5g58350.1                                                | 0 | 1.86 | 1.9 | 0.16 |
| A015629_01 | At5g16370 | AMP-binding protein; protein id: At5g16370.1                                       | 0 | 1.85 | 2.1 | 0.09 |

|            |           |                                                                           |   |      |     |      |
|------------|-----------|---------------------------------------------------------------------------|---|------|-----|------|
| A006046_01 | At2g43510 | putative trypsin inhibitor; protein id: At2g43510.1                       | 0 | 1.85 | 1.9 | 0.31 |
| A008818_01 | At2g41100 | calmodulin-like protein; protein id: At2g41100.1                          | 0 | 1.84 | 2.8 | 0.09 |
| A008582_01 | At2g36950 | expressed protein; protein id: At2g36950.1                                | 0 | 1.84 | 2.0 | 0.09 |
| A007590_01 | At2g23450 | putative protein kinase; protein id: At2g23450.1                          | 0 | 1.84 | 2.0 | 0.09 |
| A013212_01 | At4g15490 | UDP-glycosyltransferase, putative; protein id: At4g15490.1                | 0 | 1.84 | 1.2 | 2.38 |
| A017072_01 | At5g16110 | putative protein; protein id: At5g16110.1                                 | 0 | 1.84 | 2.1 | 0.09 |
| A004408_01 | At1g49500 | expressed protein; protein id: At1g49500.1                                | 0 | 1.84 | 1.6 | 0.67 |
| A009434_01 | At3g57720 | protein kinase - like protein; protein id: At3g57720.1                    | 0 | 1.83 | 2.4 | 0.09 |
| A025769_01 | At4g34030 | putative protein; protein id: At4g34030.1                                 | 0 | 1.83 | 2.6 | 0.09 |
| A020460_01 | At4g16670 | hypothetical protein; protein id: At4g16670.1                             | 0 | 1.82 | 1.9 | 0.39 |
| A024182_01 | At1g05560 | UDP-glucose transferase(UGT1); protein id: At1g05560.1                    | 0 | 1.82 | 1.9 | 0.39 |
| A022105_01 | At1g49200 | RING-H2 finger protein RHA3a, putative; protein id: At1g49200.1           | 0 | 1.82 | 1.2 | 2.38 |
| A010805_01 | At3g03870 | expressed protein; protein id: At3g03870.1                                | 0 | 1.82 | 2.8 | 0.09 |
| A019668_01 | At3g19030 | expressed protein; protein id: At3g19030.1                                | 0 | 1.81 | 2.7 | 0.09 |
| A019724_01 | At5g44580 | expressed protein; protein id: At5g44580.1                                | 0 | 1.81 | 1.9 | 0.16 |
| A020958_01 | At1g53580 | glyoxalase II, putative (hydroxyacylglutathione hydrolase); protein       | 0 | 1.81 | 2.0 | 0.09 |
| A011815_01 | At3g05900 | unknown protein; protein id: At3g05900.1                                  | 0 | 1.80 | 1.2 | 2.38 |
| A013417_01 | At4g32480 | putative protein; protein id: At4g32480.1                                 | 0 | 1.80 | 2.3 | 0.09 |
| A015062_01 | At4g38470 | protein kinase like protein; protein id: At4g38470.1                      | 0 | 1.80 | 2.5 | 0.09 |
| A006274_01 | At2g17036 | F-box protein family; protein id: At2g17036.1                             | 0 | 1.80 | 1.2 | 2.59 |
| A010555_01 | At3g03470 | cytochrome p450, putative; protein id: At3g03470.1                        | 0 | 1.80 | 2.4 | 0.09 |
| A004597_01 | At1g23390 | Kelch repeat containing F-box protein family; protein id: At1g23390.1     | 0 | 1.79 | 2.4 | 0.09 |
| A018991_01 | At5g21940 | unknown protein; protein id: At5g21940.1                                  | 0 | 1.79 | 1.7 | 0.55 |
| A018251_01 | At5g14360 | putative protein; protein id: At5g14360.1                                 | 0 | 1.79 | 2.4 | 0.09 |
| A013719_01 | At4g15530 | pyruvate,orthophosphate dikinase; protein id: At4g15530.1                 | 0 | 1.78 | 2.3 | 0.09 |
| A013537_01 | At4g14270 | expressed protein; protein id: At4g14270.1                                | 0 | 1.78 | 3.2 | 0.09 |
| A020836_01 | At1g05010 | 1-aminocyclopropane-1-carboxylate oxidase; protein id: At1g05010.1        | 0 | 1.78 | 2.1 | 0.09 |
| A000851_01 | At1g52710 | unknown protein; protein id: At1g52710.1                                  | 0 | 1.77 | 2.1 | 0.09 |
| A002539_01 | At1g32170 | xyloglucan endotransglycosylase (XTR4), putative; protein id: At1g32170.1 | 0 | 1.77 | 3.8 | 0.09 |
| A021093_01 | At4g20260 | endomembrane-associated protein; protein id: At4g20260.1                  | 0 | 1.77 | 2.0 | 0.09 |
| A014519_01 | At4g04460 | putative aspartic protease; protein id: At4g04460.1                       | 0 | 1.77 | 2.3 | 0.09 |
| A014967_01 | At4g23900 | expressed protein; protein id: At4g23900.1                                | 0 | 1.77 | 2.3 | 0.09 |
| A023437_01 | At2g38340 | DREB-like AP2 domain transcription factor; protein id: At2g38340.1        | 0 | 1.76 | 1.1 | 2.76 |
| A019544_01 | At4g25170 | putative protein; protein id: At4g25170.1                                 | 0 | 1.76 | 2.2 | 0.09 |
| A004431_01 | At1g08630 | expressed protein; protein id: At1g08630.1                                | 0 | 1.76 | 2.1 | 0.09 |
| A002473_01 | At1g69110 | pseudogene, putative ribosomal protein                                    | 0 | 1.76 | 2.0 | 0.09 |
| A021978_01 | At1g08630 | expressed protein; protein id: At1g08630.1                                | 0 | 1.76 | 2.0 | 0.16 |
| A007795_01 | At2g47270 | expressed protein; protein id: At2g47270.1                                | 0 | 1.76 | 2.4 | 0.09 |
| A011437_01 | At3g07350 | expressed protein; protein id: At3g07350.1                                | 0 | 1.76 | 1.2 | 2.38 |
| A021954_01 | At2g05380 | expressed protein; protein id: At2g05380.1                                | 0 | 1.75 | 1.1 | 2.76 |
| A020828_01 | At3g19580 | zinc finger protein, putative; protein id: At3g19580.1                    | 0 | 1.75 | 2.0 | 0.09 |
| A007347_01 | At2g23320 | WRKY family transcription factor; protein id: At2g23320.1                 | 0 | 1.75 | 2.3 | 0.09 |
| A006227_01 | At2g30230 | hypothetical protein; protein id: At2g30230.1                             | 0 | 1.74 | 1.9 | 0.16 |
| A006826_01 | At2g19570 | putative cytidine deaminase; protein id: At2g19570.1                      | 0 | 1.74 | 1.5 | 0.99 |
| A021937_01 | At1g14870 | unknown protein; protein id: At1g14870.1                                  | 0 | 1.74 | 3.0 | 0.09 |

|            |           |                                                                                        |   |      |     |      |
|------------|-----------|----------------------------------------------------------------------------------------|---|------|-----|------|
| A025739_01 | At1g73310 | putative serine carboxypeptidase; protein id: At1g73310.1                              | 0 | 1.73 | 3.2 | 0.09 |
| A001212_01 | At1g56220 | expressed protein; protein id: At1g56220.1                                             | 0 | 1.73 | 1.9 | 0.39 |
| A018949_01 | At5g22270 | putative protein; protein id: At5g22270.1                                              | 0 | 1.73 | 2.7 | 0.09 |
| A024994_01 | At4g05120 | putative protein; protein id: At4g05120.1                                              | 0 | 1.73 | 1.2 | 2.59 |
| A012839_01 | At3g08860 | putative aminotransferase; protein id: At3g08860.1                                     | 0 | 1.72 | 1.1 | 3.25 |
| A025873_01 | At5g16970 | quinone oxidoreductase -like protein; protein id: At5g16970.1                          | 0 | 1.72 | 1.1 | 2.76 |
| A015879_01 | At5g57340 | expressed protein; protein id: At5g57340.1                                             | 0 | 1.72 | 3.0 | 0.09 |
| A007148_01 | At2g42750 | expressed protein; protein id: At2g42750.1                                             | 0 | 1.72 | 2.9 | 0.09 |
| A003960_01 | At1g14130 | dioxygenase-like protein; protein id: At1g14130.1                                      | 0 | 1.72 | 2.1 | 0.09 |
| A004495_01 | At1g68520 | CONSTANS B-box zinc finger family protein; protein id: At1g68520.1                     | 0 | 1.71 | 2.9 | 0.09 |
| A022401_01 | At4g23400 | water channel - like protein; protein id: At4g23400.1                                  | 0 | 1.71 | 2.4 | 0.09 |
| A002855_01 | At1g32700 | expressed protein; protein id: At1g32700.1                                             | 0 | 1.70 | 1.8 | 0.39 |
| A006235_01 | At2g42790 | putative citrate synthase; protein id: At2g42790.1                                     | 0 | 1.69 | 1.8 | 0.42 |
| A001671_01 | At1g27980 | sphingosine-1-phosphate lyase, putative; protein id: At1g27980.1                       | 0 | 1.68 | 1.9 | 0.31 |
| A002244_01 | At1g53560 | expressed protein; protein id: At1g53560.1                                             | 0 | 1.68 | 2.8 | 0.09 |
| A020352_01 | At4g39090 | cysteine proteinase RD19A; protein id: At4g39090.1                                     | 0 | 1.68 | 1.7 | 0.55 |
| A001197_01 | At1g27320 | putative sensory transduction histidine kinase; protein id: At1g27320.1                | 0 | 1.68 | 1.9 | 0.31 |
| A013714_01 | At4g01610 | cathepsin B-like cysteine protease, putative; protein id: At4g01610.1                  | 0 | 1.67 | 2.0 | 0.16 |
| A016924_01 | At5g42200 | putative protein; protein id: At5g42200.1                                              | 0 | 1.67 | 2.8 | 0.09 |
| A008664_01 | At2g45170 | AtAPG8e; putative microtubule-associated protein; protein id: At2g45170.1              | 0 | 1.67 | 2.5 | 0.09 |
| A002045_01 | At1g74670 | GAST1-like protein; protein id: At1g74670.1                                            | 0 | 1.67 | 1.5 | 0.88 |
| A006603_01 | At2g32440 | ent-kaurenoic acid oxidase (cytochrome P450 family); protein id: At2g32440.1           | 0 | 1.66 | 2.4 | 0.09 |
| A009328_01 | At3g56880 | putative protein; protein id: At3g56880.1                                              | 0 | 1.66 | 1.6 | 0.76 |
| A022126_01 | At3g23000 | SNF1 related protein kinase (ATSRPK1); protein id: At3g23000.1                         | 0 | 1.66 | 1.3 | 1.72 |
| A025924_01 | At4g30470 | cinnamoyl-CoA reductase - like protein; protein id: At4g30470.1                        | 0 | 1.65 | 1.8 | 0.39 |
| A006421_01 | At2g38230 | similar to SOR1 from the fungus <i>Cercospora nicotianae</i> ; protein id: At2g38230.1 | 0 | 1.65 | 2.4 | 0.09 |
| A017640_01 | At5g57910 | putative protein; protein id: At5g57910.1                                              | 0 | 1.65 | 2.1 | 0.09 |
| A025727_01 | At4g37560 | formamidase - like protein; protein id: At4g37560.1                                    | 0 | 1.65 | 1.1 | 2.76 |
| A025998_01 | At1g02300 | cathepsin B-like cysteine protease, putative; protein id: At1g02300.1                  | 0 | 1.65 | 2.6 | 0.09 |
| A005845_01 | xxxx      | b/t At1g65840 and At1g65850 Chr1 C/24093474-24093529                                   | 0 | 1.65 | 1.3 | 2.22 |
| A025777_01 | At4g34030 | putative protein; protein id: At4g34030.1                                              | 0 | 1.65 | 2.3 | 0.09 |
| A007325_01 | At2g45820 | remorin; protein id: At2g45820.1                                                       | 0 | 1.64 | 3.3 | 0.09 |
| A007429_01 | At2g26690 | putative nitrate transporter; protein id: At2g26690.1                                  | 0 | 1.64 | 2.0 | 0.16 |
| A006099_01 | At2g35680 | expressed protein; protein id: At2g35680.1                                             | 0 | 1.63 | 1.8 | 0.39 |
| A024663_01 | At1g14370 | protein kinase; protein id: At1g14370.1                                                | 0 | 1.63 | 2.0 | 0.16 |
| A026002_01 | At5g07440 | glutamate dehydrogenase 2; protein id: At5g07440.1                                     | 0 | 1.63 | 3.1 | 0.09 |
| A001093_01 | At1g79270 | expressed protein; protein id: At1g79270.1                                             | 0 | 1.62 | 2.3 | 0.09 |
| A017758_01 | At5g11070 | putative protein; protein id: At5g11070.1                                              | 0 | 1.62 | 2.4 | 0.09 |
| A006897_01 | At2g32880 | unknown protein; protein id: At2g32880.1                                               | 0 | 1.62 | 1.1 | 2.76 |
| A010619_01 | At3g26510 | unknown protein; protein id: At3g26510.1                                               | 0 | 1.62 | 1.7 | 0.67 |
| A009107_01 | At3g57520 | glycosyl hydrolase family 36; protein id: At3g57520.1                                  | 0 | 1.62 | 2.4 | 0.09 |
| A002210_01 | At1g43670 | fructose 1,6-bisphosphatase, putative; protein id: At1g43670.1                         | 0 | 1.62 | 2.7 | 0.09 |
| A024599_01 | At2g25080 | glutathione peroxidase, putative; protein id: At2g25080.1                              | 0 | 1.61 | 2.2 | 0.09 |
| A020045_01 | At3g26740 | light regulated protein, putative; protein id: At3g26740.1                             | 0 | 1.61 | 2.7 | 0.09 |
| A017848_01 | At5g59960 | putative protein; protein id: At5g59960.1                                              | 0 | 1.61 | 2.4 | 0.09 |

|            |           |                                                                                            |   |      |     |      |
|------------|-----------|--------------------------------------------------------------------------------------------|---|------|-----|------|
| A014947_01 | At4g03510 | E3 ubiquitin ligase, RMA1; protein id: At4g03510.1                                         | 0 | 1.61 | 2.8 | 0.09 |
| A015543_01 | At5g13180 | NAM-like protein; protein id: At5g13180.1                                                  | 0 | 1.61 | 1.9 | 0.31 |
| A012749_01 | At3g59060 | putative protein; protein id: At3g59060.1                                                  | 0 | 1.60 | 2.1 | 0.09 |
| A019608_01 | At3g45970 | putative protein; protein id: At3g45970.1                                                  | 0 | 1.60 | 1.9 | 0.31 |
| A000612_01 | At1g13245 | expressed protein; protein id: At1g13245.1                                                 | 0 | 1.60 | 2.1 | 0.09 |
| A004511_01 | At1g15740 | expressed protein; protein id: At1g15740.1                                                 | 0 | 1.60 | 1.8 | 0.39 |
| A016817_01 | At5g60680 | putative protein; protein id: At5g60680.1                                                  | 0 | 1.60 | 2.8 | 0.09 |
| A013875_01 | At4g08290 | nodulin-like protein; protein id: At4g08290.1                                              | 0 | 1.60 | 1.2 | 2.59 |
| A020686_01 | At2g36630 | unknown protein; protein id: At2g36630.1                                                   | 0 | 1.60 | 1.9 | 0.39 |
| A019046_01 | At5g57630 | SNF1 related protein kinase-like protein; protein id: At5g57630.1                          | 0 | 1.59 | 2.5 | 0.09 |
| A007993_01 | At2g31810 | putative acetolactate synthase; protein id: At2g31810.1                                    | 0 | 1.59 | 2.3 | 0.09 |
| A015339_01 | At4g00780 | coded for by A. thaliana cDNA T20615; protein id: At4g00780.1                              | 0 | 1.59 | 1.3 | 2.13 |
| A004915_01 | At1g60140 | trehalose-6-phosphate synthase, putative; protein id: At1g60140.1                          | 0 | 1.59 | 2.8 | 0.09 |
| A005086_01 | At1g22930 | unknown protein; protein id: At1g22930.1                                                   | 0 | 1.59 | 2.0 | 0.09 |
| A024421_01 | At5g02020 | putative protein; protein id: At5g02020.1                                                  | 0 | 1.59 | 1.8 | 0.39 |
| A011307_01 | At3g59210 | putative protein; protein id: At3g59210.1                                                  | 0 | 1.59 | 1.6 | 0.88 |
| A020273_01 | At5g57655 | expressed protein; protein id: At5g57655.2                                                 | 0 | 1.58 | 2.1 | 0.09 |
| A004921_01 | At1g08920 | putative sugar transport protein, ERD6; protein id: At1g08920.1                            | 0 | 1.58 | 1.1 | 2.76 |
| A025061_01 | At3g28100 | unknown protein; protein id: At3g28100.1                                                   | 0 | 1.58 | 2.1 | 0.09 |
| A025847_01 | At5g07440 | glutamate dehydrogenase 2; protein id: At5g07440.1                                         | 0 | 1.58 | 3.2 | 0.09 |
| A025997_01 | At3g26180 | cytochrome p450 family; protein id: At3g26180.1                                            | 0 | 1.58 | 1.8 | 0.39 |
| A012502_01 | At3g07870 | F-box protein family; protein id: At3g07870.1                                              | 0 | 1.58 | 2.6 | 0.09 |
| A006761_01 | At2g31880 | leucine-rich repeat transmembrane protein kinase, putative; protein id: At2g31880.1        | 0 | 1.58 | 1.9 | 0.31 |
| A016988_01 | At5g57685 | unknown protein; protein id: At5g57685.1                                                   | 0 | 1.58 | 2.0 | 0.16 |
| A021760_01 | At1g70670 | Ca <sup>2+</sup> -binding EF-hand common family protein, putative; protein id: At1g70670.1 | 0 | 1.58 | 2.3 | 0.09 |
| A003538_01 | At1g03610 | expressed protein; protein id: At1g03610.1                                                 | 0 | 1.57 | 2.7 | 0.09 |
| A006763_01 | At2g05160 | RRM-containing protein; protein id: At2g05160.1                                            | 0 | 1.57 | 1.1 | 2.76 |
| A001495_01 | At1g52890 | NAM-like protein; protein id: At1g52890.1                                                  | 0 | 1.57 | 2.0 | 0.09 |
| A020192_01 | At2g27150 | aldehyde oxidase; protein id: At2g27150.1                                                  | 0 | 1.57 | 2.0 | 0.16 |
| A011726_01 | At3g15353 | expressed protein; protein id: At3g15353.1                                                 | 0 | 1.56 | 1.3 | 2.22 |
| A024373_01 | At3g20083 | pseudogene, cytochrome P450; protein id: At3g20083                                         | 0 | 1.56 | 2.1 | 0.09 |
| A000120_01 | At1g69600 | hypothetical protein; protein id: At1g69600.1                                              | 0 | 1.56 | 1.1 | 2.76 |
| A004588_01 | At1g67920 | expressed protein; protein id: At1g67920.1                                                 | 0 | 1.56 | 2.0 | 0.09 |
| A020145_01 | xxxx      | No hits found                                                                              | 0 | 1.56 | 2.1 | 0.09 |
| A020225_01 | At3g62550 | putative protein; protein id: At3g62550.1                                                  | 0 | 1.55 | 2.0 | 0.09 |
| A005557_01 | At3g51890 | putative protein; protein id: At3g51890.1                                                  | 0 | 1.55 | 3.6 | 0.09 |
| A008773_01 | At2g32860 | glycosyl hydrolase family 1; protein id: At2g32860.1                                       | 0 | 1.55 | 1.1 | 3.25 |
| A015182_01 | At4g13830 | DnaJ-like protein; protein id: At4g13830.1                                                 | 0 | 1.55 | 2.1 | 0.09 |
| A024610_01 | At4g19840 | lectin like protein; protein id: At4g19840.1                                               | 0 | 1.55 | 1.6 | 0.67 |
| A008742_01 | At2g33380 | RD20 protein; protein id: At2g33380.1                                                      | 0 | 1.55 | 1.1 | 2.76 |
| A020070_01 | At1g22740 | ras-related GTP-binding protein (Rab7); protein id: At1g22740.1                            | 0 | 1.54 | 1.5 | 0.99 |
| A002696_01 | At1g55510 | branched-chain alpha-keto acid decarboxylase E1 beta subunit; protein id: At1g55510.1      | 0 | 1.54 | 3.3 | 0.09 |
| A017073_01 | At5g23660 | MtN3-like protein; protein id: At5g23660.1                                                 | 0 | 1.54 | 2.3 | 0.09 |
| A025274_01 | At3g51430 | strictosidine synthase-related; protein id: At3g51430.1                                    | 0 | 1.54 | 2.0 | 0.09 |
| A013805_01 | At4g21980 | AtAPG8a; symbiosis-related like protein; protein id: At4g21980.1                           | 0 | 1.54 | 2.0 | 0.16 |

|            |           |                                                                                                  |   |      |     |      |
|------------|-----------|--------------------------------------------------------------------------------------------------|---|------|-----|------|
| A017311_01 | At5g13330 | putative protein; protein id: At5g13330.1                                                        | 0 | 1.54 | 2.3 | 0.09 |
| A005562_01 | At1g23870 | trehalose 6-phosphate synthase, putative; protein id: At1g23870.1                                | 0 | 1.54 | 2.6 | 0.09 |
| A019247_01 | At5g06860 | polygalacturonase inhibiting protein (PGIP1); protein id: At5g06860.1                            | 0 | 1.53 | 2.0 | 0.09 |
| A006771_01 | At2g35900 | hypothetical protein; protein id: At2g35900.1                                                    | 0 | 1.53 | 2.7 | 0.09 |
| A015351_01 | At4g28240 | putative wound induced protein; protein id: At4g28240.1                                          | 0 | 1.53 | 1.4 | 1.29 |
| A018157_01 | At5g62540 | ubiquitin-conjugating enzyme E2-17 kd 3ubiquitin-protein ligase 3                                | 0 | 1.53 | 2.6 | 0.09 |
| A021085_01 | At5g26340 | hexose transporter - like protein; protein id: At5g26340.1                                       | 0 | 1.53 | 2.5 | 0.09 |
| A005009_01 | xxxx      | b/t unknown protein; protein id: At1g49030.1 and unknown protein                                 | 0 | 1.52 | 3.0 | 0.09 |
| A017387_01 | At5g45800 | leucine-rich repeat transmembrane protein kinase, putative; protein id: At5g45800.1              | 0 | 1.52 | 2.6 | 0.09 |
| A024578_01 | At3g17810 | dehydrogenase, putative; protein id: At3g17810.1                                                 | 0 | 1.52 | 2.1 | 0.09 |
| A011862_01 | At3g54140 | peptide transport - like protein; protein id: At3g54140.1                                        | 0 | 1.52 | 2.4 | 0.09 |
| A017595_01 | At5g01880 | putative protein; protein id: At5g01880.1                                                        | 0 | 1.52 | 2.5 | 0.09 |
| A012825_01 | At3g29240 | chloroplast lumen common protein family; protein id: At3g29240.1                                 | 0 | 1.52 | 2.8 | 0.09 |
| A004931_01 | At1g21000 | expressed protein; protein id: At1g21000.1                                                       | 0 | 1.52 | 1.4 | 1.29 |
| A012747_01 | At3g15450 | expressed protein; protein id: At3g15450.1                                                       | 0 | 1.52 | 1.4 | 1.29 |
| A013429_01 | At4g01330 | putative protein kinase; protein id: At4g01330.1                                                 | 0 | 1.51 | 2.3 | 0.09 |
| A014276_01 | At4g13530 | putative protein; protein id: At4g13530.1                                                        | 0 | 1.51 | 1.9 | 0.16 |
| A020633_01 | At4g36040 | DnaJ-like protein; protein id: At4g36040.1                                                       | 0 | 1.51 | 1.6 | 0.67 |
| A007301_01 | At2g26670 | heme oxygenase 1 (HO1); protein id: At2g26670.1                                                  | 0 | 1.51 | 2.1 | 0.09 |
| A021335_01 | At4g15700 | glutaredoxin homolog; protein id: At4g15700.1                                                    | 0 | 1.51 | 2.0 | 0.16 |
| A009165_01 | At3g26100 | expressed protein; protein id: At3g26100.1                                                       | 0 | 1.51 | 1.5 | 1.00 |
| A020868_01 | At3g10020 | expressed protein; protein id: At3g10020.1                                                       | 0 | 1.51 | 3.0 | 0.09 |
| A002088_01 | At1g25550 | expressed protein; protein id: At1g25550.1                                                       | 0 | 1.51 | 1.1 | 3.25 |
| A023277_01 | At1g47540 | trypsin inhibitor 2, putative; protein id: At1g47540.1                                           | 0 | 1.51 | 2.9 | 0.09 |
| A007844_01 | At2g36320 | expressed protein; protein id: At2g36320.1                                                       | 0 | 1.50 | 2.8 | 0.09 |
| A016411_01 | At5g03180 | putative protein; protein id: At5g03180.1                                                        | 0 | 1.50 | 1.9 | 0.31 |
| A002441_01 | At1g27100 | unknown protein; protein id: At1g27100.1                                                         | 0 | 1.50 | 1.9 | 0.31 |
| A006811_01 | At2g13360 | alanine-glyoxylate aminotransferase; protein id: At2g13360.1                                     | 0 | 1.50 | 2.9 | 0.09 |
| A001784_01 | At1g73870 | CONSTANS B-box zinc finger family protein; protein id: At1g73870.1                               | 0 | 1.50 | 1.1 | 2.76 |
| A024299_01 | At3g12020 | kinesin-related protein; protein id: At3g12020.1                                                 | 0 | 1.50 | 2.2 | 0.09 |
| A009088_01 | At3g04910 | putative mitogen activated protein kinase kinase; protein id: At3g04910.1                        | 0 | 1.49 | 2.1 | 0.09 |
| A004542_01 | At1g55810 | uracil phosphoribosyltransferase, putative; protein id: At1g55810.1                              | 0 | 1.49 | 3.0 | 0.09 |
| A011777_01 | At3g13445 | transcription initiation factor TFIID-1 (TATA sequence-binding protein); protein id: At3g13445.1 | 0 | 1.49 | 2.1 | 0.09 |
| A020144_01 | At1g68440 | expressed protein; protein id: At1g68440.1                                                       | 0 | 1.49 | 2.1 | 0.09 |
| A023658_01 | At2g36080 | putative DNA-binding protein RAV2; protein id: At2g36080.1                                       | 0 | 1.49 | 2.2 | 0.09 |
| A009305_01 | At3g22750 | expressed protein; protein id: At3g22750.1                                                       | 0 | 1.49 | 2.0 | 0.09 |
| A019031_01 | At5g64240 | expressed protein; protein id: At5g64240.1                                                       | 0 | 1.48 | 1.2 | 2.38 |
| A018240_01 | At5g12010 | putative protein; protein id: At5g12010.1                                                        | 0 | 1.48 | 1.8 | 0.42 |
| A025947_01 | At1g72900 | disease resistance protein (TIR-NBS class), putative; protein id: At1g72900.1                    | 0 | 1.48 | 1.6 | 0.88 |
| A010658_01 | At3g55610 | delta-1-pyrroline-5-carboxylate synthetase; protein id: At3g55610.1                              | 0 | 1.48 | 1.9 | 0.39 |
| A004165_01 | At1g01240 | expressed protein; protein id: At1g01240.1                                                       | 0 | 1.48 | 2.6 | 0.09 |
| A019057_01 | At5g43260 | expressed protein; protein id: At5g43260.1                                                       | 0 | 1.48 | 2.4 | 0.09 |
| A002515_01 | At1g07590 | DNA-binding protein, putative; protein id: At1g07590.1                                           | 0 | 1.48 | 1.1 | 2.76 |
| A012748_01 | At3g48580 | xyloglucan endotransglycosylase, putative; protein id: At3g48580.1                               | 0 | 1.48 | 1.1 | 2.76 |
| A024682_01 | At5g40890 | CLC-a chloride channel protein; protein id: At5g40890.1                                          | 0 | 1.48 | 1.4 | 1.29 |

|            |           |                                                                                       |   |      |     |      |
|------------|-----------|---------------------------------------------------------------------------------------|---|------|-----|------|
| A015167_01 | At4g31390 | similar to putative ABC transporter; protein id: At4g31390.1                          | 0 | 1.47 | 1.2 | 2.38 |
| A002073_01 | At1g47128 | cysteine proteinase RD21A; protein id: At1g47128.1                                    | 0 | 1.47 | 1.6 | 0.76 |
| A003567_01 | At1g64660 | methionine/cystathionine gamma lyase, putative; protein id: At1g64660.1               | 0 | 1.47 | 2.6 | 0.09 |
| A012695_01 | At3g62260 | protein phosphatase 2C (PP2C); protein id: At3g62260.1                                | 0 | 1.47 | 1.7 | 0.55 |
| A020076_01 | At3g13450 | branched chain alpha-keto acid dehydrogenase E1 beta subunit; protein id: At3g13450.1 | 0 | 1.47 | 2.4 | 0.09 |
| A015866_01 | At5g22920 | PGPD14 protein; protein id: At5g22920.1                                               | 0 | 1.47 | 1.7 | 0.55 |
| A015279_01 | At4g16690 | cyanohydrin lyase like protein; protein id: At4g16690.1                               | 0 | 1.47 | 1.9 | 0.16 |
| A017044_01 | At5g64840 | ABC transporter family protein; protein id: At5g64840.1                               | 0 | 1.47 | 2.0 | 0.16 |
| A010617_01 | At3g05160 | putative sugar transporter; protein id: At3g05160.1                                   | 0 | 1.47 | 2.5 | 0.09 |
| A018110_01 | At5g59960 | putative protein; protein id: At5g59960.1                                             | 0 | 1.46 | 1.6 | 0.67 |
| A007781_01 | At2g21620 | auxin-regulated protein; protein id: At2g21620.2                                      | 0 | 1.46 | 2.8 | 0.09 |
| A006596_01 | At2g29350 | putative tropinone reductase; protein id: At2g29350.1                                 | 0 | 1.46 | 1.7 | 0.67 |
| A007860_01 | At2g03310 | hypothetical protein; protein id: At2g03310.1                                         | 0 | 1.46 | 2.1 | 0.09 |
| A014705_01 | At4g35750 | putative protein; protein id: At4g35750.1                                             | 0 | 1.46 | 1.6 | 0.76 |
| A011007_01 | At3g11930 | ethylene-responsive protein, putative; protein id: At3g11930.2                        | 0 | 1.45 | 1.9 | 0.31 |
| A019954_01 | At1g71040 | spore coat protein-like protein; protein id: At1g71040.1                              | 0 | 1.45 | 2.7 | 0.09 |
| A020710_01 | At1g71030 | myb family transcription factor; protein id: At1g71030.1                              | 0 | 1.45 | 2.8 | 0.09 |
| A005182_01 | At2g28305 | expressed protein; protein id: At2g28305.1                                            | 0 | 1.45 | 1.7 | 0.55 |
| A001136_01 | At1g21410 | F-box protein family; protein id: At1g21410.1                                         | 0 | 1.45 | 1.9 | 0.39 |
| A014161_01 | At4g36760 | aminopeptidase-like protein; protein id: At4g36760.1                                  | 0 | 1.45 | 2.7 | 0.09 |
| A014186_01 | At4g36730 | G-box-binding factor 1; protein id: At4g36730.1                                       | 0 | 1.45 | 2.0 | 0.16 |
| A007065_01 | At2g38910 | putative calcium-dependent protein kinase; protein id: At2g38910.1                    | 0 | 1.45 | 2.9 | 0.09 |
| A005981_01 | At1g20620 | catalase 3; protein id: At1g20620.1                                                   | 0 | 1.44 | 2.0 | 0.09 |
| A009836_01 | At3g01970 | WRKY family transcription factor; protein id: At3g01970.1                             | 0 | 1.44 | 1.1 | 3.25 |
| A011094_01 | At3g21790 | putative UDP-glucose glucosyltransferase; protein id: At3g21790.1                     | 0 | 1.44 | 2.0 | 0.09 |
| A017547_01 | At5g55970 | putative protein; protein id: At5g55970.1                                             | 0 | 1.44 | 1.8 | 0.39 |
| A002762_01 | At1g52880 | NAM-like protein; protein id: At1g52880.1                                             | 0 | 1.44 | 2.1 | 0.09 |
| A012694_01 | At3g26580 | unknown protein; protein id: At3g26580.1                                              | 0 | 1.44 | 2.0 | 0.09 |
| A014295_01 | At4g11570 | putative protein; protein id: At4g11570.1                                             | 0 | 1.44 | 2.6 | 0.09 |
| A022324_01 | At4g21930 | putative protein; protein id: At4g21930.1                                             | 0 | 1.44 | 1.2 | 2.38 |
| A003537_01 | At1g63800 | E2, ubiquitin-conjugating enzyme 5 (UBC5); protein id: At1g63800.1                    | 0 | 1.43 | 2.7 | 0.09 |
| A020343_01 | At3g21870 | PREG-like protein, putative; protein id: At3g21870.1                                  | 0 | 1.43 | 3.0 | 0.09 |
| A020105_01 | At5g04760 | I-box binding factor - like protein; protein id: At5g04760.1                          | 0 | 1.43 | 1.5 | 0.99 |
| A007075_01 | At2g21180 | expressed protein; protein id: At2g21180.1                                            | 0 | 1.43 | 1.9 | 0.31 |
| A016682_01 | At5g54660 | expressed protein; protein id: At5g54660.1                                            | 0 | 1.42 | 1.4 | 1.00 |
| A018308_01 | At5g16360 | putative protein; protein id: At5g16360.1                                             | 0 | 1.42 | 1.6 | 0.88 |
| A015331_01 | At4g24040 | glycosyl hydrolase family 37 (trehalase); protein id: At4g24040.1                     | 0 | 1.42 | 1.8 | 0.39 |
| A017128_01 | At5g51070 | ATP-dependent Clp protease ATP-binding subunit (ClpD), ERD1                           | 0 | 1.42 | 2.0 | 0.16 |
| A004048_01 | At1g18470 | expressed protein; protein id: At1g18470.1                                            | 0 | 1.41 | 2.2 | 0.09 |
| A007704_01 | At2g39570 | expressed protein; protein id: At2g39570.1                                            | 0 | 1.41 | 2.2 | 0.09 |
| A008214_01 | At2g07000 | unknown protein; protein id: At2g07000.1                                              | 0 | 1.41 | 1.1 | 3.25 |
| A016980_01 | At5g55700 | glycosyl hydrolase family 14 (beta-amylase); protein id: At5g55700.1                  | 0 | 1.41 | 1.5 | 0.99 |
| A024538_01 | At3g06850 | branched chain alpha-keto acid dehydrogenase E2 subunit; protein id: At3g06850.1      | 0 | 1.41 | 3.3 | 0.09 |
| A016244_01 | At5g16120 | lipase-like protein; protein id: At5g16120.1                                          | 0 | 1.41 | 2.6 | 0.09 |
| A018147_01 | At5g54170 | membrane related protein-like; protein id: At5g54170.1                                | 0 | 1.41 | 2.5 | 0.09 |

|            |           |                                                                     |   |      |     |      |
|------------|-----------|---------------------------------------------------------------------|---|------|-----|------|
| A020289_01 | At1g21680 | expressed protein; protein id: At1g21680.1                          | 0 | 1.40 | 2.2 | 0.09 |
| A003614_01 | At1g33050 | unknown protein; protein id: At1g33050.1                            | 0 | 1.40 | 2.0 | 0.09 |
| A012838_01 | At3g47160 | RNA-binding protein-like protein; protein id: At3g47160.1           | 0 | 1.40 | 1.8 | 0.42 |
| A018041_01 | At5g19120 | conglutin gamma - like protein; protein id: At5g19120.1             | 0 | 1.40 | 1.7 | 0.55 |
| A019466_01 | At5g54250 | cyclic nucleotide-regulated ion channel (CNGC4); protein id: At5g   | 0 | 1.40 | 2.2 | 0.09 |
| A020955_01 | At2g16700 | actin depolymerizing factor 5; protein id: At2g16700.1              | 0 | 1.40 | 2.2 | 0.09 |
| A013000_01 | At4g34350 | putative protein; protein id: At4g34350.1                           | 0 | 1.39 | 1.8 | 0.42 |
| A011820_01 | At3g56360 | putative protein; protein id: At3g56360.1                           | 0 | 1.39 | 2.0 | 0.09 |
| A011781_01 | At3g51920 | putative calmodulin; protein id: At3g51920.1                        | 0 | 1.39 | 1.5 | 0.88 |
| A002488_01 | At1g76110 | unknown protein; protein id: At1g76110.1                            | 0 | 1.39 | 2.2 | 0.09 |
| A014274_01 | At4g12830 | hydrolase-like protein; protein id: At4g12830.1                     | 0 | 1.39 | 3.0 | 0.09 |
| A006724_01 | At2g22680 | copa-like retroelement pol polyprotein; protein id: At2g22680.1     | 0 | 1.39 | 1.3 | 2.22 |
| A003736_01 | At1g68230 | unknown protein; protein id: At1g68230.1                            | 0 | 1.38 | 2.1 | 0.09 |
| A002220_01 | At1g62370 | hypothetical protein; protein id: At1g62370.1                       | 0 | 1.38 | 1.8 | 0.39 |
| A007073_01 | At2g16660 | nodulin-like protein; protein id: At2g16660.1                       | 0 | 1.38 | 2.3 | 0.09 |
| A006944_01 | At2g44490 | glycosyl hydrolase family 1; protein id: At2g44490.1                | 0 | 1.38 | 1.6 | 0.88 |
| A013470_01 | At4g03560 | putative calcium channel; protein id: At4g03560.1                   | 0 | 1.38 | 1.9 | 0.16 |
| A021873_01 | At5g18630 | triacylglycerol lipase-like protein; protein id: At5g18630.1        | 0 | 1.37 | 2.6 | 0.09 |
| A017277_01 | At5g17860 | potassium-dependent sodium-calcium exchanger - like protein; p      | 0 | 1.37 | 1.7 | 0.55 |
| A018153_01 | At5g21020 | putative protein; protein id: At5g21020.1                           | 0 | 1.37 | 1.7 | 0.55 |
| A024501_01 | At4g32060 | putative protein; protein id: At4g32060.1                           | 0 | 1.37 | 1.4 | 1.29 |
| A011429_01 | At3g20250 | pumilio-family RNA-binding protein, putative; protein id: At3g2025  | 0 | 1.37 | 1.6 | 0.88 |
| A011631_01 | At3g61260 | putative DNA-binding protein; protein id: At3g61260.1               | 0 | 1.37 | 2.0 | 0.09 |
| A008667_01 | At2g46030 | E2, ubiquitin-conjugating enzyme 6 (UBC6); protein id: At2g46030    | 0 | 1.37 | 2.1 | 0.09 |
| A001240_01 | At1g28260 | hypothetical protein; protein id: At1g28260.1                       | 0 | 1.37 | 2.3 | 0.09 |
| A007966_01 | At2g31800 | putative protein kinase; protein id: At2g31800.1                    | 0 | 1.37 | 3.1 | 0.09 |
| A023623_01 | At2g31560 | unknown protein; protein id: At2g31560.1                            | 0 | 1.36 | 1.7 | 0.55 |
| A001247_01 | At1g50420 | scarecrow-like 3; protein id: At1g50420.1                           | 0 | 1.36 | 1.7 | 0.55 |
| A017360_01 | At5g47860 | putative protein; protein id: At5g47860.1                           | 0 | 1.36 | 1.9 | 0.31 |
| A017656_01 | At5g45900 | AtAPG7; ubiquitin activating enzyme E1-like protein; protein id: At | 0 | 1.36 | 1.3 | 2.22 |
| A021035_01 | At5g63190 | topoisomerase, putative; protein id: At5g63190.1                    | 0 | 1.36 | 2.1 | 0.09 |
| A024636_01 | At1g23310 | putative alanine aminotransferase; protein id: At1g23310.1          | 0 | 1.36 | 1.8 | 0.42 |
| A017664_01 | At5g46760 | bHLH protein; protein id: At5g46760.1                               | 0 | 1.35 | 2.5 | 0.09 |
| A024350_01 | At1g62570 | flavin-containing monooxygenase, putative; protein id: At1g62570    | 0 | 1.35 | 2.0 | 0.09 |
| A017871_01 | At5g10830 | embryonic abundant protein -like; protein id: At5g10830.1           | 0 | 1.35 | 2.7 | 0.09 |
| A009530_01 | At3g21550 | expressed protein; protein id: At3g21550.1                          | 0 | 1.35 | 1.8 | 0.39 |
| A004528_01 | At1g08570 | putative thioredoxin; protein id: At1g08570.1                       | 0 | 1.35 | 1.6 | 0.88 |
| A015639_01 | At5g25130 | cytochrome p450 family; protein id: At5g25130.1                     | 0 | 1.35 | 2.2 | 0.09 |
| A025408_01 | At2g22920 | putative serine carboxypeptidase I; protein id: At2g22920.1         | 0 | 1.35 | 1.5 | 0.88 |
| A002438_01 | At1g75410 | BEL1-like homeodomain 3 protein (BLH3); protein id: At1g75410.      | 0 | 1.35 | 1.9 | 0.31 |
| A020645_01 | At2g01490 | expressed protein; protein id: At2g01490.1                          | 0 | 1.35 | 1.9 | 0.39 |
| A016420_01 | At5g02160 | putative protein                                                    | 0 | 1.35 | 1.3 | 2.13 |
| A013435_01 | At4g01600 | putative ABA-repsponsive protein; protein id: At4g01600.1           | 0 | 1.34 | 1.3 | 1.72 |
| A021309_01 | At4g01060 | myb family transcription factor; protein id: At4g01060.1            | 0 | 1.34 | 1.2 | 2.59 |
| A014229_01 | At4g10080 | putative protein; protein id: At4g10080.1                           | 0 | 1.34 | 1.8 | 0.39 |

|            |           |                                                                        |   |      |     |      |
|------------|-----------|------------------------------------------------------------------------|---|------|-----|------|
| A007794_01 | At2g01850 | xyloglucan endotransglycosylase (EXGT-A3); protein id: At2g018         | 0 | 1.34 | 2.6 | 0.09 |
| A024588_01 | At4g37300 | putative protein; protein id: At4g37300.1                              | 0 | 1.33 | 1.8 | 0.42 |
| A005629_01 | At5g21170 | AKIN beta1; protein id: At5g21170.1                                    | 0 | 1.33 | 2.3 | 0.09 |
| A009525_01 | At3g53420 | plasma membrane intrinsic protein 2a; protein id: At3g53420.1          | 0 | 1.33 | 1.4 | 1.00 |
| A014919_01 | At4g38060 | putative protein; protein id: At4g38060.1                              | 0 | 1.33 | 1.7 | 0.67 |
| A010863_01 | At3g21420 | expressed protein; protein id: At3g21420.1                             | 0 | 1.33 | 1.8 | 0.39 |
| A015498_01 | At5g10930 | serine/threonine protein kinase -like protein; protein id: At5g10930   | 0 | 1.33 | 1.1 | 3.25 |
| A024689_01 | At5g48160 | putative protein; protein id: At5g48160.1                              | 0 | 1.33 | 1.4 | 1.29 |
| A013086_01 | At4g21580 | putative NADPH quinone oxidoreductase; protein id: At4g21580.1         | 0 | 1.33 | 2.3 | 0.09 |
| A022436_01 | At4g37560 | formamidase - like protein; protein id: At4g37560.1                    | 0 | 1.33 | 1.2 | 2.38 |
| A010323_01 | At3g52480 | putative protein; protein id: At3g52480.1                              | 0 | 1.33 | 1.6 | 0.76 |
| A009890_01 | At3g30775 | hypothetical protein; protein id: At3g30775.1                          | 0 | 1.32 | 2.5 | 0.09 |
| A007433_01 | At2g45220 | pectinesterase family; protein id: At2g45220.1                         | 0 | 1.32 | 2.0 | 0.16 |
| A009105_01 | At3g09830 | putative protein kinase; protein id: At3g09830.1                       | 0 | 1.32 | 2.5 | 0.09 |
| A018637_01 | At5g52630 | selenium-binding protein-like; protein id: At5g52630.1                 | 0 | 1.32 | 2.5 | 0.09 |
| A000639_01 | At1g16320 | unknown protein; protein id: At1g16320.1                               | 0 | 1.32 | 1.9 | 0.31 |
| A024456_01 | At1g58032 | hypothetical protein; protein id: At1g58032.1                          | 0 | 1.32 | 1.9 | 0.31 |
| A020795_01 | At1g72150 | cytosolic factor, putative; protein id: At1g72150.1                    | 0 | 1.32 | 2.1 | 0.09 |
| A004682_01 | At1g09970 | leucine-rich repeat transmembrane protein kinase, putative; prote      | 0 | 1.32 | 2.5 | 0.09 |
| A018270_01 | At5g24120 | sigma-like factor (emb CAA77213.1); protein id: At5g24120.1            | 0 | 1.32 | 1.5 | 0.88 |
| A002118_01 | At1g78080 | AP2 domain protein RAP2.4; protein id: At1g78080.1                     | 0 | 1.31 | 2.4 | 0.09 |
| A000652_01 | At1g29050 | expressed protein; protein id: At1g29050.1                             | 0 | 1.31 | 2.2 | 0.09 |
| A003544_01 | At1g16720 | unknown protein; protein id: At1g16720.1                               | 0 | 1.31 | 1.8 | 0.39 |
| A008007_01 | At2g14170 | putative methylmalonate semi-aldehyde dehydrogenase; protein i         | 0 | 1.31 | 2.3 | 0.09 |
| A009557_01 | At3g12320 | expressed protein; protein id: At3g12320.1                             | 0 | 1.31 | 1.1 | 2.76 |
| A000856_01 | At1g27300 | expressed protein; protein id: At1g27300.1                             | 0 | 1.30 | 1.7 | 0.67 |
| A019698_01 | At5g63790 | putative protein; protein id: At5g63790.1                              | 0 | 1.30 | 1.4 | 1.50 |
| A024249_01 | At2g40140 | putative CCCH-type zinc finger protein; protein id: At2g40140.1        | 0 | 1.30 | 1.9 | 0.31 |
| A001392_01 | At1g19660 | expressed protein; protein id: At1g19660.1                             | 0 | 1.30 | 1.8 | 0.42 |
| A001418_01 | At1g75220 | integral membrane protein, putative; protein id: At1g75220.1           | 0 | 1.30 | 2.0 | 0.09 |
| A001874_01 | At1g72680 | putative cinnamyl-alcohol dehydrogenase; protein id: At1g72680.        | 0 | 1.30 | 2.2 | 0.09 |
| A014046_01 | At4g25000 | alpha-amylase - like protein; protein id: At4g25000.1                  | 0 | 1.30 | 2.5 | 0.09 |
| A020109_01 | At1g50290 | expressed protein; protein id: At1g50290.1                             | 0 | 1.30 | 1.4 | 1.29 |
| A024396_01 | At1g55960 | membrane related protein CP5, putative; protein id: At1g55960.1        | 0 | 1.30 | 2.1 | 0.09 |
| A009139_01 | At3g51600 | non-specific lipid transfer protein; protein id: At3g51600.1           | 0 | 1.30 | 1.8 | 0.39 |
| A021796_01 | At3g05880 | low temperature and salt responsive protein LT16A; protein id: At3     | 0 | 1.30 | 2.0 | 0.09 |
| A018423_01 | At5g58120 | disease resistance protein (TIR-NBS-LRR class), putative; protei       | 0 | 1.30 | 2.0 | 0.09 |
| A012379_01 | At3g16110 | putative protein disulfide isomerase; protein id: At3g16110.1          | 0 | 1.29 | 2.1 | 0.09 |
| A012847_01 | At3g15810 | expressed protein; protein id: At3g15810.1                             | 0 | 1.29 | 2.2 | 0.09 |
| A007064_01 | At2g38870 | putative protease inhibitor; protein id: At2g38870.1                   | 0 | 1.29 | 3.0 | 0.09 |
| A006030_01 | At2g40880 | putative cysteine proteinase inhibitor B (cystatin B); protein id: At2 | 0 | 1.29 | 2.0 | 0.09 |
| A017783_01 | At5g06980 | expressed protein; protein id: At5g06980.1                             | 0 | 1.29 | 1.4 | 1.29 |
| A019926_01 | At1g77920 | bZIP transcription factor, bZIP50; protein id: At1g77920.1             | 0 | 1.29 | 2.4 | 0.09 |
| A014769_01 | At4g02380 | coded for by A. thaliana cDNA T46835; protein id: At4g02380.1          | 0 | 1.28 | 2.5 | 0.09 |
| A024664_01 | At3g10450 | putative glucose acyltransferase; protein id: At3g10450.1              | 0 | 1.28 | 1.6 | 0.76 |



|            |               |                                                                                    |   |      |     |      |
|------------|---------------|------------------------------------------------------------------------------------|---|------|-----|------|
| A000814_01 | At1g74840     | myb family transcription factor; protein id: At1g74840.1                           | 0 | 1.28 | 1.6 | 0.76 |
| A000567_01 | At1g22190     | AP2 domain transcription factor RAP2, putative; protein id: At1g22190.1            | 0 | 1.28 | 1.6 | 0.88 |
| A025944_01 | At5g43060     | cysteine protease component of protease-inhibitor complex; protein id: At5g43060.1 | 0 | 1.28 | 2.1 | 0.09 |
| A024219_01 | At5g57710     | 101 kDa heat shock protein; HSP101-like protein; protein id: At5g57710.1           | 0 | 1.28 | 2.2 | 0.09 |
| A010518_01 | At3g50770     | calmodulin-like protein; protein id: At3g50770.1                                   | 0 | 1.28 | 2.3 | 0.09 |
| A002798_01 | At1g53570     | MAP3K alpha protein kinase, putative; protein id: At1g53570.1                      | 0 | 1.27 | 1.8 | 0.42 |
| A020344_01 | At2g29420     | glutathione transferase, putative; protein id: At2g29420.1                         | 0 | 1.27 | 1.6 | 0.67 |
| A020751_01 | not annotated | Chr1 W/25637330-25637399                                                           | 0 | 1.27 | 1.3 | 1.72 |
| A006935_01 | At2g26170     | thromboxane-A synthase(cytochrome p450 family), putative; protein id: At2g26170.1  | 0 | 1.27 | 1.4 | 1.29 |
| A011227_01 | At3g60420     | putative protein; protein id: At3g60420.1                                          | 0 | 1.27 | 1.1 | 2.76 |
| A014068_01 | At4g23870     | putative protein                                                                   | 0 | 1.27 | 2.2 | 0.09 |
| A018911_01 | At5g19140     | aluminium-induced protein - like; protein id: At5g19140.1                          | 0 | 1.27 | 1.5 | 0.99 |
| A000795_01 | At1g66980     | kinase, putative; protein id: At1g66980.1                                          | 0 | 1.27 | 1.9 | 0.39 |
| A011957_01 | At3g06210     | hypothetical protein; protein id: At3g06210.1                                      | 0 | 1.27 | 2.2 | 0.09 |
| A007160_01 | At2g35770     | putative serine carboxypeptidase II; protein id: At2g35770.1                       | 0 | 1.27 | 2.5 | 0.09 |
| A003675_01 | At1g70520     | putative protein kinase; protein id: At1g70520.1                                   | 0 | 1.27 | 1.9 | 0.39 |
| A021131_01 | At1g76180     | dehydrin, putative; protein id: At1g76180.1                                        | 0 | 1.27 | 2.7 | 0.09 |
| A002491_01 | At1g11380     | expressed protein; protein id: At1g11380.1                                         | 0 | 1.26 | 3.0 | 0.09 |
| A010065_01 | At3g14610     | cytochrome P450, putative; protein id: At3g14610.1                                 | 0 | 1.26 | 2.1 | 0.09 |
| A017890_01 | At5g23050     | acetyl-CoA synthetase-like protein; protein id: At5g23050.1                        | 0 | 1.26 | 1.7 | 0.55 |
| A014457_01 | At4g31510     | putative protein; protein id: At4g31510.1                                          | 0 | 1.26 | 2.0 | 0.09 |
| A021913_01 | xxxx          | b/t pseudogene, putative retroelement pol polyprotein; protein id: At21913.1       | 0 | 1.26 | 1.5 | 1.00 |
| A010579_01 | At3g54880     | putative protein; protein id: At3g54880.1                                          | 0 | 1.26 | 2.3 | 0.09 |
| A017867_01 | At5g05110     | putative cysteine proteinase inhibitor                                             | 0 | 1.26 | 1.7 | 0.42 |
| A007530_01 | At2g03550     | putative esterase; protein id: At2g03550.1                                         | 0 | 1.26 | 1.8 | 0.39 |
| A012732_01 | At3g06810     | acetyl-coA dehydrogenase, putative; protein id: At3g06810.1                        | 0 | 1.26 | 1.9 | 0.16 |
| A011763_01 | At3g14990     | 4-methyl-5-(b-hydroxyethyl)-thiazole monophosphate biosynthesis                    | 0 | 1.26 | 1.8 | 0.39 |
| A006056_01 | At2g37970     | expressed protein; protein id: At2g37970.1                                         | 0 | 1.25 | 1.4 | 1.50 |
| A007311_01 | At2g25900     | putative CCCH-type zinc finger protein; protein id: At2g25900.1                    | 0 | 1.25 | 1.5 | 1.00 |
| A021199_01 | At3g24420     | unknown protein; protein id: At3g24420.1                                           | 0 | 1.25 | 1.3 | 2.13 |
| A010464_01 | At3g19900     | expressed protein; protein id: At3g19900.1                                         | 0 | 1.25 | 1.9 | 0.31 |
| A007768_01 | At2g42620     | F-box protein ORE9, AtFBL7; protein id: At2g42620.1                                | 0 | 1.25 | 2.1 | 0.09 |
| A020530_01 | At1g29240     | unknown protein; protein id: At1g29240.1                                           | 0 | 1.25 | 2.5 | 0.09 |
| A019587_01 | At4g09030     | arabinogalactan-protein (AGP10); protein id: At4g09030.1                           | 0 | 1.24 | 1.6 | 0.88 |
| A020053_01 | At3g14067     | subtilisin-like serine protease, putative; protein id: At3g14067.1                 | 0 | 1.24 | 1.3 | 2.22 |
| A021249_01 | At1g07610     | metallothionein-like protein; protein id: At1g07610.1                              | 0 | 1.24 | 1.6 | 0.88 |
| A008481_01 | At2g21120     | unknown protein; protein id: At2g21120.1                                           | 0 | 1.24 | 2.0 | 0.09 |
| A009583_01 | At3g47250     | putative protein; protein id: At3g47250.1                                          | 0 | 1.24 | 1.6 | 0.88 |
| A020189_01 | At3g16857     | ARR1 protein, putative; protein id: At3g16857.1                                    | 0 | 1.23 | 1.8 | 0.39 |
| A014571_01 | At4g28270     | putative protein; protein id: At4g28270.1                                          | 0 | 1.23 | 1.4 | 1.50 |
| A020009_01 | At5g07220     | putative protein; protein id: At5g07220.1                                          | 0 | 1.23 | 1.4 | 1.29 |
| A025585_01 | At1g63370     | flavin-binding monooxygenase, putative; protein id: At1g63370.1                    | 0 | 1.23 | 1.9 | 0.16 |
| A000653_01 | At1g11530     | thioredoxin h, putative; protein id: At1g11530.1                                   | 0 | 1.23 | 1.8 | 0.42 |
| A002126_01 | At1g02850     | glycosyl hydrolase family 1; protein id: At1g02850.1                               | 0 | 1.23 | 2.1 | 0.09 |
| A004177_01 | At1g63180     | uridine diphosphate glucose epimerase, putative; protein id: At1g63180.1           | 0 | 1.23 | 2.4 | 0.09 |

|            |           |                                                                            |   |      |     |      |
|------------|-----------|----------------------------------------------------------------------------|---|------|-----|------|
| A015105_01 | At4g04955 | expressed protein; protein id: At4g04955.1                                 | 0 | 1.22 | 1.5 | 0.88 |
| A018715_01 | At5g10750 | putative protein; protein id: At5g10750.1                                  | 0 | 1.22 | 1.6 | 0.76 |
| A008500_01 | At2g35940 | BEL1-like homeobox 1 protein (BLH1); protein id: At2g35940.1               | 0 | 1.22 | 1.8 | 0.42 |
| A010364_01 | At3g11100 | expressed protein; protein id: At3g11100.1                                 | 0 | 1.22 | 1.7 | 0.55 |
| A019252_01 | At5g11060 | homeobox protein knotted-1 like 4 (KNAT4); protein id: At5g11060.1         | 0 | 1.22 | 1.6 | 0.76 |
| A020873_01 | At3g21670 | nitrate transporter; protein id: At3g21670.1                               | 0 | 1.22 | 1.6 | 0.76 |
| A013880_01 | At4g02020 | polycomb group - like protein; protein id: At4g02020.1                     | 0 | 1.22 | 1.4 | 1.50 |
| A012385_01 | At3g06040 | hypothetical protein; protein id: At3g06040.1                              | 0 | 1.21 | 2.2 | 0.09 |
| A004735_01 | At1g68580 | unknown protein; protein id: At1g68580.1                                   | 0 | 1.21 | 2.0 | 0.09 |
| A007756_01 | At2g41250 | hypothetical protein; protein id: At2g41250.1                              | 0 | 1.21 | 1.5 | 0.99 |
| A021820_01 | At3g26280 | cytochrome p450 family; protein id: At3g26280.1                            | 0 | 1.21 | 1.6 | 0.88 |
| A024435_01 | At5g54940 | translation initiation factor-like protein; protein id: At5g54940.2        | 0 | 1.21 | 2.4 | 0.09 |
| A025772_01 | At4g26530 | fructose-bisphosphate aldolase - like protein; protein id: At4g26530.1     | 0 | 1.21 | 1.4 | 1.29 |
| A016209_01 | At5g64260 | phi-1-like protein; protein id: At5g64260.1                                | 0 | 1.21 | 2.6 | 0.09 |
| A020929_01 | At1g01490 | expressed protein; protein id: At1g01490.1                                 | 0 | 1.21 | 2.0 | 0.16 |
| A020564_01 | At1g27290 | expressed protein; protein id: At1g27290.1                                 | 0 | 1.21 | 2.0 | 0.09 |
| A012159_01 | At3g09950 | hypothetical protein; protein id: At3g09950.1                              | 0 | 1.20 | 2.3 | 0.09 |
| A014147_01 | At4g36400 | actin interacting protein; protein id: At4g36400.1                         | 0 | 1.20 | 1.8 | 0.39 |
| A020656_01 | At3g29810 | phytochelatin synthetase-like protein; protein id: At3g29810.1             | 0 | 1.20 | 2.0 | 0.16 |
| A025036_01 | At3g62740 | glycosyl hydrolase family 1; protein id: At3g62740.1                       | 0 | 1.20 | 1.6 | 0.76 |
| A021874_01 | At3g19800 | expressed protein; protein id: At3g19800.1                                 | 0 | 1.19 | 2.4 | 0.09 |
| A004458_01 | At1g52870 | expressed protein; protein id: At1g52870.2                                 | 0 | 1.19 | 2.4 | 0.09 |
| A020482_01 | At2g23810 | hypothetical protein; protein id: At2g23810.1                              | 0 | 1.19 | 1.8 | 0.42 |
| A013129_01 | At4g25640 | putative protein; protein id: At4g25640.1                                  | 0 | 1.19 | 1.5 | 0.99 |
| A020741_01 | At4g26080 | protein phosphatase ABI1; protein id: At4g26080.1                          | 0 | 1.19 | 1.6 | 0.88 |
| A021968_01 | At3g53990 | expressed protein; protein id: At3g53990.1                                 | 0 | 1.19 | 2.6 | 0.09 |
| A002258_01 | At1g14890 | expressed protein; protein id: At1g14890.1                                 | 0 | 1.19 | 2.3 | 0.09 |
| A013717_01 | At4g16190 | cysteine proteinase; protein id: At4g16190.1                               | 0 | 1.19 | 1.2 | 2.38 |
| A020363_01 | At2g39800 | delta-1-pyrroline 5-carboxylase synthetase (P5C1); protein id: At2g39800.1 | 0 | 1.19 | 1.6 | 0.88 |
| A007422_01 | At2g48020 | putative sugar transporter; protein id: At2g48020.1                        | 0 | 1.19 | 2.0 | 0.09 |
| A012123_01 | At3g18773 | pseudogene, unknown protein                                                | 0 | 1.19 | 1.9 | 0.16 |
| A016266_01 | At5g47050 | putative protein; protein id: At5g47050.1                                  | 0 | 1.19 | 1.4 | 1.29 |
| A017477_01 | At5g45350 | expressed protein; protein id: At5g45350.1                                 | 0 | 1.18 | 1.5 | 0.99 |
| A019014_01 | At5g47560 | sodium-dicarboxylate cotransporter-like; protein id: At5g47560.1           | 0 | 1.18 | 1.8 | 0.39 |
| A001092_01 | At1g64860 | plastid RNA polymerase sigma-subunit; protein id: At1g64860.1              | 0 | 1.18 | 1.5 | 1.00 |
| A016323_01 | At5g15850 | zinc finger protein CONSTANS-LIKE 1 (COL1); protein id: At5g15850.1        | 0 | 1.18 | 1.4 | 1.00 |
| A010390_01 | At3g15770 | hypothetical protein; protein id: At3g15770.1                              | 0 | 1.18 | 1.3 | 1.72 |
| A018531_01 | At5g59750 | GTP cyclohydrolase II / 3,4-dihydroxy-2-butanone-4-phosphate synthase      | 0 | 1.18 | 1.6 | 0.67 |
| A010874_01 | At3g10525 | expressed protein; protein id: At3g10525.1                                 | 0 | 1.18 | 2.0 | 0.09 |
| A013044_01 | At4g23890 | putative protein; protein id: At4g23890.1                                  | 0 | 1.17 | 2.1 | 0.09 |
| A014936_01 | At4g36410 | E2, ubiquitin-conjugating enzyme 17 (UBC17); protein id: At4g36410.1       | 0 | 1.17 | 1.8 | 0.39 |
| A015313_01 | At4g31240 | similar to putative receptor kinase; protein id: At4g31240.1               | 0 | 1.17 | 1.8 | 0.39 |
| A021520_01 | At2g02390 | glutathione transferase, putative; protein id: At2g02390.1                 | 0 | 1.17 | 1.1 | 2.76 |
| A011613_01 | At3g23640 | glycosyl hydrolase family 31; protein id: At3g23640.1                      | 0 | 1.17 | 1.4 | 1.29 |
| A021079_01 | At1g10150 | expressed protein; protein id: At1g10150.1                                 | 0 | 1.17 | 2.0 | 0.09 |

|            |           |                                                                            |   |      |     |      |
|------------|-----------|----------------------------------------------------------------------------|---|------|-----|------|
| A008637_01 | At2g43400 | putative electron transfer flavoprotein ubiquinone oxidoreductase          | 0 | 1.17 | 2.5 | 0.09 |
| A010527_01 | At3g56170 | putative protein; protein id: At3g56170.1                                  | 0 | 1.17 | 1.4 | 1.50 |
| A019281_01 | At5g14420 | putative protein; protein id: At5g14420.1                                  | 0 | 1.17 | 2.6 | 0.09 |
| A019301_01 | At5g47040 | Lon protease homolog 1 precursor; protein id: At5g47040.1                  | 0 | 1.17 | 1.3 | 1.72 |
| A003114_01 | At1g19450 | integral membrane protein, putative; protein id: At1g19450.1               | 0 | 1.16 | 1.7 | 0.42 |
| A012283_01 | At3g22560 | hypothetical protein; protein id: At3g22560.1                              | 0 | 1.16 | 1.3 | 2.22 |
| A021071_01 | At4g37790 | homeobox protein HAT22; protein id: At4g37790.1                            | 0 | 1.16 | 1.9 | 0.31 |
| A021993_01 | At4g21980 | AtAPG8a; symbiosis-related like protein; protein id: At4g21980.1           | 0 | 1.16 | 1.3 | 2.13 |
| A003518_01 | At1g79380 | expressed protein; protein id: At1g79380.1                                 | 0 | 1.16 | 1.7 | 0.67 |
| A012739_01 | At3g57300 | helicase-like protein; protein id: At3g57300.1                             | 0 | 1.16 | 1.3 | 1.72 |
| A014072_01 | At4g16520 | AtAPG8f; symbiosis-related like protein; protein id: At4g16520.1           | 0 | 1.16 | 1.8 | 0.42 |
| A011505_01 | At3g52840 | glycosyl hydrolase family 35 (beta-galactosidase); protein id: At3g52840.1 | 0 | 1.16 | 2.3 | 0.09 |
| A013468_01 | At4g03410 | hypothetical protein; protein id: At4g03410.1                              | 0 | 1.16 | 2.1 | 0.09 |
| A025916_01 | At1g02305 | expressed protein; protein id: At1g02305.1                                 | 0 | 1.16 | 1.4 | 1.29 |
| A004774_01 | At1g04970 | expressed protein; protein id: At1g04970.1                                 | 0 | 1.16 | 1.9 | 0.16 |
| A011831_01 | At3g51130 | putative protein; protein id: At3g51130.1                                  | 0 | 1.16 | 1.6 | 0.88 |
| A012155_01 | At3g03990 | expressed protein; protein id: At3g03990.1                                 | 0 | 1.15 | 1.4 | 1.00 |
| A001105_01 | At1g14330 | hypothetical protein; protein id: At1g14330.1                              | 0 | 1.15 | 1.7 | 0.55 |
| A002854_01 | At1g80310 | putative sulfate transporter; protein id: At1g80310.1                      | 0 | 1.15 | 1.7 | 0.67 |
| A012396_01 | At3g57960 | hypothetical protein; protein id: At3g57960.1                              | 0 | 1.15 | 1.8 | 0.39 |
| A009296_01 | At3g27090 | gda-1, putative; protein id: At3g27090.1                                   | 0 | 1.15 | 1.4 | 1.72 |
| A023242_01 | At1g54090 | hypothetical protein; protein id: At1g54090.1                              | 0 | 1.15 | 2.1 | 0.09 |
| A020126_01 | At5g59960 | putative protein; protein id: At5g59960.1                                  | 0 | 1.14 | 1.3 | 2.13 |
| A019515_01 | At4g17840 | expressed protein; protein id: At4g17840.1                                 | 0 | 1.14 | 1.6 | 0.76 |
| A024559_01 | At1g42550 | unknown protein; protein id: At1g42550.1                                   | 0 | 1.14 | 2.0 | 0.09 |
| A001773_01 | At1g70530 | putative protein kinase; protein id: At1g70530.1                           | 0 | 1.14 | 2.7 | 0.09 |
| A003636_01 | At1g05840 | expressed protein; protein id: At1g05840.1                                 | 0 | 1.14 | 1.5 | 0.88 |
| A015465_01 | At4g37260 | myb DNA-binding protein (AtMYB73); protein id: At4g37260.1                 | 0 | 1.13 | 1.8 | 0.39 |
| A019000_01 | At5g67370 | putative protein; protein id: At5g67370.1                                  | 0 | 1.13 | 2.6 | 0.09 |
| A013782_01 | At4g20930 | 3-hydroxyisobutyrate dehydrogenase -like protein; protein id: At4g20930.1  | 0 | 1.13 | 1.7 | 0.55 |
| A014031_01 | At4g26700 | fimbrin-like protein (ATFIM1); protein id: At4g26700.1                     | 0 | 1.13 | 1.9 | 0.31 |
| A018974_01 | At5g23340 | putative protein; protein id: At5g23340.1                                  | 0 | 1.13 | 1.7 | 0.55 |
| A006708_01 | At2g38820 | expressed protein; protein id: At2g38820.1                                 | 0 | 1.13 | 1.8 | 0.42 |
| A016618_01 | At5g03330 | putative protein; protein id: At5g03330.1                                  | 0 | 1.13 | 1.4 | 1.50 |
| A000888_01 | At1g50730 | hypothetical protein; protein id: At1g50730.1                              | 0 | 1.13 | 2.0 | 0.09 |
| A007306_01 | At2g05100 | light-harvesting chlorophyll a/b binding protein; protein id: At2g05100.1  | 0 | 1.13 | 2.1 | 0.09 |
| A016845_01 | At5g35170 | adenylate kinase -like protein; protein id: At5g35170.1                    | 0 | 1.13 | 1.1 | 3.25 |
| A020064_01 | At4g24570 | mitochondrial carrier protein family; protein id: At4g24570.1              | 0 | 1.13 | 2.2 | 0.09 |
| A020917_01 | At1g75380 | wound-responsive protein, putative; protein id: At1g75380.1                | 0 | 1.13 | 1.2 | 2.22 |
| A005097_01 | At3g51840 | acyl-coA dehydrogenase; protein id: At3g51840.1                            | 0 | 1.13 | 1.6 | 0.67 |
| A008733_01 | At2g17450 | putative RING zinc finger protein; protein id: At2g17450.1                 | 0 | 1.13 | 1.8 | 0.39 |
| A016703_01 | At5g02970 | putative protein; protein id: At5g02970.1                                  | 0 | 1.13 | 1.7 | 0.55 |
| A019659_01 | At5g51640 | putative protein; protein id: At5g51640.1                                  | 0 | 1.13 | 2.3 | 0.09 |
| A023329_01 | At3g46530 | disease resistance protein, RPP13-like (CC-NBS class), putative;           | 0 | 1.12 | 2.1 | 0.09 |
| A002797_01 | At1g54710 | expressed protein; protein id: At1g54710.1                                 | 0 | 1.12 | 1.5 | 1.00 |

|            |           |                                                                            |   |      |     |      |
|------------|-----------|----------------------------------------------------------------------------|---|------|-----|------|
| A018827_01 | At5g54870 | putative protein; protein id: At5g54870.1                                  | 0 | 1.12 | 1.6 | 0.67 |
| A025403_01 | At2g29340 | putative tropinone reductase; protein id: At2g29340.1                      | 0 | 1.12 | 1.9 | 0.31 |
| A009803_01 | At3g03480 | putative hypersensitivity-related gene; protein id: At3g03480.1            | 0 | 1.12 | 1.4 | 1.29 |
| A016210_01 | At5g14780 | formate dehydrogenase; protein id:At5g14780.1                              | 0 | 1.12 | 1.4 | 1.72 |
| A005835_01 | At1g75730 | hypothetical protein; protein id: At1g75730.1                              | 0 | 1.11 | 1.4 | 1.29 |
| A009551_01 | At3g45780 | nonphototropic hypocotyl 1; protein id: At3g45780.1                        | 0 | 1.11 | 2.6 | 0.09 |
| A022555_01 | At4g02860 | putative protein; protein id: At4g02860.1                                  | 0 | 1.11 | 1.5 | 1.00 |
| A003130_01 | At1g30090 | expressed protein; protein id: At1g30090.1                                 | 0 | 1.11 | 1.3 | 1.72 |
| A024676_01 | At4g04620 | AtAPG8b; putative symbiosis-related protein; protein id: At4g04620.1       | 0 | 1.11 | 1.7 | 0.55 |
| A008454_01 | At2g20730 | unknown protein; protein id: At2g20730.1                                   | 0 | 1.11 | 2.0 | 0.16 |
| A016227_01 | At5g48540 | 33 kDa secretory protein-like; protein id: At5g48540.1                     | 0 | 1.11 | 1.8 | 0.39 |
| A018467_01 | At5g52250 | G-protein beta-subunit (transducin) family; protein id: At5g52250.1        | 0 | 1.11 | 1.4 | 1.00 |
| A015883_01 | At5g14120 | nodulin-like protein; protein id: At5g14120.1                              | 0 | 1.11 | 1.5 | 0.99 |
| A016960_01 | At5g02880 | putative protein; protein id: At5g02880.1                                  | 0 | 1.11 | 1.2 | 2.38 |
| A018195_01 | At5g51970 | sorbitol dehydrogenase-like protein; protein id: At5g51970.1               | 0 | 1.11 | 1.9 | 0.39 |
| A025946_01 | At1g35670 | calcium-dependent protein kinase; protein id: At1g35670.1                  | 0 | 1.11 | 2.0 | 0.16 |
| A018070_01 | At5g47540 | putative protein; protein id: At5g47540.1                                  | 0 | 1.10 | 1.7 | 0.55 |
| A001378_01 | At1g32460 | expressed protein; protein id: At1g32460.1                                 | 0 | 1.10 | 2.0 | 0.09 |
| A025167_01 | At3g14640 | cytochrome P450, putative; protein id: At3g14640.1                         | 0 | 1.10 | 1.2 | 2.38 |
| A012944_01 | At4g32070 | putative protein; protein id: At4g32070.1                                  | 0 | 1.10 | 2.3 | 0.09 |
| A021045_01 | At2g35820 | expressed protein; protein id: At2g35820.1                                 | 0 | 1.10 | 1.1 | 2.76 |
| A011976_01 | At3g10910 | putative RING zinc finger protein; protein id: At3g10910.1                 | 0 | 1.09 | 1.3 | 2.22 |
| A017319_01 | At5g35970 | DNA helicase-like; protein id: At5g35970.1                                 | 0 | 1.09 | 1.6 | 0.88 |
| A014126_01 | At4g28025 | expressed protein; protein id: At4g28025.1                                 | 0 | 1.09 | 1.8 | 0.39 |
| A002736_01 | At1g29760 | hypothetical protein; protein id: At1g29760.1                              | 0 | 1.09 | 1.4 | 1.29 |
| A012771_01 | At3g58750 | citrate synthase -like protein; protein id: At3g58750.1                    | 0 | 1.09 | 2.1 | 0.09 |
| A017000_01 | At5g66930 | putative protein; protein id: At5g66930.1                                  | 0 | 1.09 | 2.2 | 0.09 |
| A021130_01 | At1g09070 | expressed protein; protein id: At1g09070.1                                 | 0 | 1.09 | 1.6 | 0.67 |
| A002838_01 | At1g08980 | expressed protein; protein id: At1g08980.1                                 | 0 | 1.09 | 2.4 | 0.09 |
| A016949_01 | At5g17300 | expressed protein; protein id: At5g17300.1                                 | 0 | 1.09 | 1.3 | 1.72 |
| A024399_01 | At3g14270 | unknown protein; protein id: At3g14270.1                                   | 0 | 1.09 | 1.8 | 0.42 |
| A011854_01 | At3g45640 | mitogen-activated protein kinase 3; protein id: At3g45640.1                | 0 | 1.08 | 1.5 | 0.99 |
| A024665_01 | At5g58800 | quinone reductase family; protein id: At5g58800.1                          | 0 | 1.08 | 2.1 | 0.09 |
| A001619_01 | At1g24160 | unknown protein; protein id: At1g24160.1                                   | 0 | 1.08 | 1.6 | 0.67 |
| A022019_01 | At3g48690 | putative protein; protein id: At3g48690.1                                  | 0 | 1.08 | 2.0 | 0.09 |
| A017575_01 | At5g01850 | protein kinase ATN1-like protein; protein id: At5g01850.1                  | 0 | 1.08 | 2.1 | 0.09 |
| A012797_01 | At3g27110 | expressed protein; protein id: At3g27110.1                                 | 0 | 1.08 | 1.8 | 0.39 |
| A020654_01 | At1g49050 | expressed protein; protein id: At1g49050.1                                 | 0 | 1.08 | 2.6 | 0.09 |
| A004173_01 | At1g29800 | unknown protein; protein id: At1g29800.1                                   | 0 | 1.08 | 1.9 | 0.16 |
| A012275_01 | At3g07700 | expressed protein; protein id: At3g07700.1                                 | 0 | 1.08 | 1.8 | 0.39 |
| A012672_01 | At3g52800 | zinc finger - like protein; protein id: At3g52800.1                        | 0 | 1.08 | 1.3 | 1.72 |
| A017692_01 | At5g64930 | CPR5 protein, putative; protein id: At5g64930.1                            | 0 | 1.08 | 1.7 | 0.42 |
| A020062_01 | At1g54290 | protein translation factor Sui1 homolog, putative; protein id: At1g54290.1 | 0 | 1.08 | 2.1 | 0.09 |
| A024522_01 | At3g09390 | metallothionein-like protein; protein id: At3g09390.1                      | 0 | 1.08 | 1.4 | 1.00 |
| A013659_01 | At4g10610 | RNA-binding protein RBP37; protein id: At4g10610.1                         | 0 | 1.08 | 1.7 | 0.67 |

|            |           |                                                                        |   |      |     |      |
|------------|-----------|------------------------------------------------------------------------|---|------|-----|------|
| A001222_01 | At1g78320 | glutathione transferase, putative; protein id: At1g78320.1             | 0 | 1.08 | 1.5 | 0.99 |
| A004151_01 | At1g33110 | unknown protein; protein id: At1g33110.1                               | 0 | 1.08 | 1.4 | 1.29 |
| A008532_01 | At2g33150 | 3-ketoacyl-CoA thiolase; protein id: At2g33150.1                       | 0 | 1.08 | 1.9 | 0.39 |
| A019725_01 | At5g54510 | auxin-responsive-like protein; protein id: At5g54510.1                 | 0 | 1.08 | 1.9 | 0.39 |
| A001299_01 | At1g07600 | metallothionein-like protein; protein id: At1g07600.1                  | 0 | 1.07 | 1.6 | 0.88 |
| A004896_01 | At1g09570 | putative phytochrome A; protein id: At1g09570.1                        | 0 | 1.07 | 2.0 | 0.16 |
| A006050_01 | At2g39000 | unknown protein; protein id: At2g39000.1                               | 0 | 1.07 | 2.3 | 0.09 |
| A020214_01 | At3g47960 | putative peptide transporter; protein id: At3g47960.1                  | 0 | 1.07 | 1.6 | 0.88 |
| A016141_01 | At5g41790 | myosin heavy chain-like protein; protein id: At5g41790.1               | 0 | 1.07 | 1.6 | 0.67 |
| A002284_01 | At1g17520 | myb-related DNA-binding protein, putative; protein id: At1g17520.      | 0 | 1.07 | 1.6 | 0.67 |
| A007291_01 | At2g22470 | arabinogalactan-protein (AGP2); protein id: At2g22470.1                | 0 | 1.07 | 1.2 | 2.59 |
| A020570_01 | At5g57660 | putative CONSTANS B-box zinc finger protein; protein id: At5g57        | 0 | 1.07 | 1.2 | 2.38 |
| A014798_01 | At4g14430 | carnitine racemase like protein; protein id: At4g14430.1               | 0 | 1.07 | 1.4 | 1.29 |
| A016278_01 | At5g61590 | ethylene responsive element binding factor - like; protein id: At5g    | 0 | 1.07 | 1.2 | 2.59 |
| A020102_01 | At5g02840 | myb family transcription factor; protein id: At5g02840.1               | 0 | 1.07 | 1.9 | 0.31 |
| A002737_01 | At1g28580 | lipase, putative; protein id: At1g28580.1                              | 0 | 1.07 | 1.4 | 1.50 |
| A002651_01 | At1g70410 | carbonic anhydrase, putative; protein id: At1g70410.1                  | 0 | 1.06 | 2.0 | 0.09 |
| A018427_01 | At5g59400 | putative protein; protein id: At5g59400.2                              | 0 | 1.06 | 1.8 | 0.39 |
| A025644_01 | At1g56280 | expressed protein; protein id: At1g56280.1                             | 0 | 1.06 | 1.3 | 1.72 |
| A001091_01 | At1g64680 | expressed protein; protein id: At1g64680.1                             | 0 | 1.06 | 2.4 | 0.09 |
| A006277_01 | At2g35800 | putative mitochondrial carrier protein; protein id: At2g35800.1        | 0 | 1.06 | 1.6 | 0.76 |
| A018264_01 | At5g05930 | expressed protein; protein id: At5g05930.1                             | 0 | 1.06 | 2.2 | 0.09 |
| A011732_01 | At3g62420 | bZIP family transcription factor; protein id: At3g62420.1              | 0 | 1.06 | 1.9 | 0.39 |
| A012421_01 | At3g19500 | expressed protein; protein id: At3g19500.1                             | 0 | 1.06 | 2.2 | 0.09 |
| A001284_01 | At1g79040 | photosystem II polypeptide, putative; protein id: At1g79040.1          | 0 | 1.05 | 1.4 | 1.29 |
| A007579_01 | At2g28550 | AP2 domain protein RAP2.7; protein id: At2g28550.1                     | 0 | 1.05 | 1.7 | 0.42 |
| A001959_01 | At1g04400 | putative cryptochrome 2 apoprotein; protein id: At1g04400.1            | 0 | 1.05 | 1.6 | 0.76 |
| A006291_01 | At2g33990 | putative SF16 protein {Helianthus annuus}; protein id: At2g33990       | 0 | 1.05 | 2.2 | 0.09 |
| A007959_01 | At2g45980 | expressed protein; protein id: At2g45980.1                             | 0 | 1.05 | 2.3 | 0.09 |
| A014801_01 | At4g25620 | unknown protein; protein id: At4g25620.1                               | 0 | 1.05 | 1.1 | 2.76 |
| A011607_01 | At3g52340 | expressed protein; protein id: At3g52340.1                             | 0 | 1.05 | 2.2 | 0.09 |
| A024513_01 | At4g37550 | formamidase - like protein; protein id: At4g37550.1                    | 0 | 1.05 | 2.3 | 0.09 |
| A015134_01 | At4g22710 | cytochrome p450 family; protein id: At4g22710.1                        | 0 | 1.05 | 1.3 | 2.13 |
| A016963_01 | At5g05140 | putative protein; protein id: At5g05140.1                              | 0 | 1.05 | 1.9 | 0.39 |
| A003703_01 | At1g48320 | hypothetical protein; protein id: At1g48320.1                          | 0 | 1.05 | 1.1 | 2.76 |
| A010731_01 | At3g27690 | light harvesting chlorophyll A/B binding protein, putative; protein id | 0 | 1.05 | 2.2 | 0.09 |
| A019617_01 | At5g04770 | amino acid transport - like protein; protein id: At5g04770.1           | 0 | 1.05 | 1.5 | 0.99 |
| A022927_01 | At5g44290 | cyclin-dependent protein kinase-like protein; protein id: At5g4429     | 0 | 1.05 | 2.1 | 0.09 |
| A015088_01 | At4g34920 | putative protein; protein id: At4g34920.1                              | 0 | 1.04 | 1.5 | 1.00 |
| A019941_01 | At1g60010 | expressed protein; protein id: At1g60010.1                             | 0 | 1.04 | 1.7 | 0.55 |
| A020565_01 | At3g10980 | unknown protein; protein id: At3g10980.1                               | 0 | 1.04 | 1.9 | 0.31 |
| A014165_01 | At4g30790 | putative protein; protein id: At4g30790.1                              | 0 | 1.04 | 2.1 | 0.09 |
| A014539_01 | At4g16130 | galactokinase like protein; protein id: At4g16130.1                    | 0 | 1.04 | 1.4 | 1.29 |
| A000555_01 | At1g72180 | leucine-rich repeat transmembrane protein kinase, putative; prote      | 0 | 1.04 | 1.8 | 0.42 |
| A005620_01 | At5g28020 | cysteine synthase; protein id: At5g28020.1                             | 0 | 1.04 | 1.6 | 0.88 |

|            |           |                                                                                                  |   |      |     |      |
|------------|-----------|--------------------------------------------------------------------------------------------------|---|------|-----|------|
| A008330_01 | At2g24550 | expressed protein; protein id: At2g24550.1                                                       | 0 | 1.04 | 1.2 | 2.59 |
| A015249_01 | At4g35060 | copper chaperone (CCH)-related; protein id: At4g35060.1                                          | 0 | 1.04 | 1.5 | 0.99 |
| A009077_01 | At3g25690 | unknown protein; protein id: At3g25690.1                                                         | 0 | 1.04 | 1.6 | 0.76 |
| A025268_01 | At1g08930 | zinc finger protein ATZF1, putative; protein id: At1g08930.1                                     | 0 | 1.04 | 1.2 | 2.59 |
| A025995_01 | At2g01670 | expressed protein; protein id: At2g01670.1                                                       | 0 | 1.04 | 1.9 | 0.16 |
| A008183_01 | At2g26030 | F-box protein; protein id: At2g26030.1                                                           | 0 | 1.04 | 1.5 | 0.99 |
| A016597_01 | At5g01800 | putative protein; protein id: At5g01800.1                                                        | 0 | 1.04 | 1.3 | 2.13 |
| A012572_01 | At3g06510 | glycosyl hydrolase family 1; protein id: At3g06510.1                                             | 0 | 1.04 | 1.7 | 0.55 |
| A018267_01 | At5g25220 | KNAT3 homeodomain protein; protein id: At5g25220.1                                               | 0 | 1.03 | 1.5 | 0.88 |
| A026004_01 | At5g48620 | disease resistance protein (CC-NBS-LRR class), putative; protein id: At5g48620.1                 | 0 | 1.03 | 1.9 | 0.16 |
| A017868_01 | At5g56460 | protein kinase-like protein; protein id: At5g56460.1                                             | 0 | 1.03 | 1.7 | 0.67 |
| A023904_01 | At1g49130 | CONSTANS B-box zinc finger family protein; protein id: At1g49130.1                               | 0 | 1.03 | 1.6 | 0.76 |
| A001827_01 | At1g17050 | geranyl diphosphate synthase (GPPS)(dimethylallyltransferase), putative; protein id: At1g17050.1 | 0 | 1.03 | 2.0 | 0.09 |
| A009501_01 | At3g48740 | MTN3-like protein; protein id: At3g48740.1                                                       | 0 | 1.03 | 1.3 | 1.72 |
| A012964_01 | At4g19510 | disease resistance protein (TIR-NBS-LRR class), putative; protein id: At4g19510.1                | 0 | 1.03 | 1.6 | 0.88 |
| A025372_01 | At5g35450 | disease resistance protein (CC-NBS-LRR class), putative; protein id: At5g35450.1                 | 0 | 1.03 | 1.8 | 0.42 |
| A003431_01 | At1g06460 | heat shock protein, putative; protein id: At1g06460.1                                            | 0 | 1.03 | 1.4 | 1.50 |
| A024642_01 | At2g01420 | PIN4; putative auxin transport protein; protein id: At2g01420.1                                  | 0 | 1.03 | 1.5 | 0.99 |
| A025101_01 | At5g16340 | AMP-binding protein; protein id: At5g16340.1                                                     | 0 | 1.03 | 1.6 | 0.76 |
| A012001_01 | At3g06780 | expressed protein; protein id: At3g06780.1                                                       | 0 | 1.02 | 1.3 | 2.22 |
| A009378_01 | At3g27820 | monodehydroascorbate reductase, putative; protein id: At3g27820.1                                | 0 | 1.02 | 2.2 | 0.09 |
| A006253_01 | At2g24180 | cytochrome p450 family; protein id: At2g24180.1                                                  | 0 | 1.02 | 1.6 | 0.67 |
| A013046_01 | At4g21560 | putative protein; protein id: At4g21560.1                                                        | 0 | 1.02 | 1.8 | 0.42 |
| A011737_01 | At3g57530 | calcium-dependent protein kinase; protein id: At3g57530.1                                        | 0 | 1.02 | 2.1 | 0.09 |
| A006817_01 | At2g14910 | unknown protein; protein id: At2g14910.1                                                         | 0 | 1.02 | 1.6 | 0.67 |
| A009121_01 | At3g63210 | putative protein; protein id: At3g63210.1                                                        | 0 | 1.02 | 1.7 | 0.55 |
| A015336_01 | At4g32150 | synaptobrevin-like protein; protein id: At4g32150.1                                              | 0 | 1.02 | 1.4 | 1.29 |
| A012086_01 | At3g17000 | E2, ubiquitin-conjugating enzyme, putative; protein id: At3g17000.1                              | 0 | 1.02 | 1.2 | 2.59 |
| A002732_01 | At1g73680 | feebly-like protein; protein id: At1g73680.1                                                     | 0 | 1.02 | 1.7 | 0.67 |
| A013974_01 | At4g24400 | serine/threonine kinase-like protein; protein id: At4g24400.1                                    | 0 | 1.02 | 1.4 | 1.29 |
| A016407_01 | At5g47070 | protein serine threonine kinase-like; protein id: At5g47070.1                                    | 0 | 1.01 | 1.9 | 0.31 |
| A017815_01 | At4g13261 | hypothetical protein; protein id: At4g13261.1                                                    | 0 | 1.01 | 1.3 | 2.13 |
| A000853_01 | At1g52680 | expressed protein; protein id: At1g52680.1                                                       | 0 | 1.01 | 1.1 | 2.76 |
| A001285_01 | At1g50020 | tubulin alpha-6 chain, putative; protein id: At1g50020.1                                         | 0 | 1.01 | 2.2 | 0.09 |
| A001861_01 | At1g78510 | geranyl diphosphate synthase (GPPS)(dimethylallyltransferase), putative; protein id: At1g78510.1 | 0 | 1.01 | 1.4 | 1.29 |
| A014765_01 | At4g17080 | hypothetical protein; protein id: At4g17080.1                                                    | 0 | 1.01 | 1.7 | 0.55 |
| A014802_01 | At4g24660 | putative protein; protein id: At4g24660.1                                                        | 0 | 1.01 | 2.2 | 0.09 |
| A024107_01 | At1g23440 | hypothetical protein; protein id: At1g23440.1                                                    | 0 | 1.01 | 1.4 | 1.50 |
| A003121_01 | At1g55110 | zinc finger protein, putative; protein id: At1g55110.1                                           | 0 | 1.01 | 1.6 | 0.76 |
| A018964_01 | At5g56180 | putative protein; protein id: At5g56180.1                                                        | 0 | 1.01 | 1.6 | 0.67 |
| A022125_01 | At1g13080 | cytochrome p450 family; protein id: At1g13080.1                                                  | 0 | 1.01 | 2.2 | 0.09 |
| A002011_01 | At1g20440 | hypothetical protein; protein id: At1g20440.1                                                    | 0 | 1.01 | 1.3 | 1.72 |
| A006710_01 | At2g38800 | calmodulin-binding protein; protein id: At2g38800.1                                              | 0 | 1.00 | 1.2 | 2.59 |
| A010276_01 | At3g54500 | putative protein; protein id: At3g54500.1                                                        | 0 | 1.00 | 2.5 | 0.09 |
| A005208_01 | At1g60590 | polygalacturonase, putative; protein id: At1g60590.1                                             | 0 | 1.00 | 1.7 | 0.55 |

|            |           |                                                                             |   |      |     |      |
|------------|-----------|-----------------------------------------------------------------------------|---|------|-----|------|
| A025971_01 | At1g08510 | acyl-(acyl carrier protein) thioesterase, putative; protein id: At1g08510.1 | 0 | 1.00 | 1.4 | 1.50 |
| A023353_01 | At2g17110 | expressed protein; protein id: At2g17110.1                                  | 0 | 1.00 | 1.9 | 0.39 |
| A006661_01 | At2g16890 | putative glucosyltransferase; protein id: At2g16890.2                       | 0 | 1.00 | 1.6 | 0.88 |
| A009780_01 | At3g01520 | expressed protein; protein id: At3g01520.1                                  | 0 | 1.00 | 1.4 | 1.50 |

**Table S5. Enriched GO terms within the different expression profiles**

Over-represented and under-represented GO terms within the 8 SOM groups resulting after a 4x2 SOM analysis of the differentially expressed genes in the 0-1, 2-3 and 10-14 DPA dataset. In black, non redundant GO terms. Significant enriched GO terms were considered when adjusted p value < 0.05. GO level of the term; AGI, number and percentage of genes included in the SOM at the level; AGI, number and percentage of genes included platform at the level; and adjusted p value of significance are shown.

## Enriched GO terms in SOMs of Up-regulated genes

**SOM1 - Up early and sustained**

| Over-represented                                  | Level | Genes in SOM                  | Number in SOM | % of annotated in SOM at the level | Genes in platform             | Number in platform | % of annotated in platform at the level | #1 vs #2      | Adjusted p value |
|---------------------------------------------------|-------|-------------------------------|---------------|------------------------------------|-------------------------------|--------------------|-----------------------------------------|---------------|------------------|
| <b>autophagy (GO:0006914)</b>                     | 3     | At4g21980,At4g16100,At4g16101 | 6             | 2.4%                               | At5g61500,At2g44140,At2g44141 | 13                 | 0.1%                                    | 95.59% 4.41%  | 1.0E-04          |
| <b>aging (GO:0007568)</b>                         | 3     | At5g66170,At4g30100,At4g30101 | 13            | 3.6%                               | At2g42620,At3g49620,At5g59560 | 52                 | 0.4%                                    | 89.24% 10.76% | 1.1E-04          |
| response to abiotic stimulus (GO:0009628)         | 3     | At4g35770,At1g53670,At1g53671 | 36            | 14.6%                              | At3g53110,At1g54050,At1g54051 | 760                | 6.6%                                    | 69% 31%       | 2.7E-04          |
| response to stress (GO:0006950)                   | 3     | At1g12780,At3g49620,At3g49621 | 36            | 14.6%                              | At1g53670,At3g05210,At3g05211 | 889                | 7.7%                                    | 65.55% 34.45% | 3.4E-03          |
| catabolic process (GO:0009056)                    | 3     | At3g10740,At1g22920,At1g22921 | 26            | 10.5%                              | At1g71770,At1g77440,At1g77441 | 562                | 4.8%                                    | 68.49% 31.51% | 3.4E-03          |
| response to external stimulus (GO:0009605)        | 3     | At4g35770,At2g30100,At2g30101 | 11            | 4.5%                               | At4g21440,At5g58140,At3g49620 | 197                | 1.7%                                    | 72.4% 27.6%   | 4.2E-02          |
| response to osmotic stress (GO:0006970)           | 4     | At3g45640,At3g51000,At3g51001 | 14            | 6.0%                               | At5g50720,At2g37180,At4g21440 | 195                | 1.8%                                    | 77.22% 22.78% | 1.3E-02          |
| response to water (GO:0009415)                    | 4     | At1g56280,At3g19580,At3g19581 | 10            | 4.3%                               | At5g25610,At5g52310,At2g46505 | 115                | 1.0%                                    | 80.42% 19.58% | 1.3E-02          |
| cellular catabolic process (GO:0044248)           | 4     | At1g21410,At1g53670,At1g53671 | 26            | 11.1%                              | At5g41240,At1g65120,At2g46505 | 539                | 4.9%                                    | 69.49% 30.51% | 1.3E-02          |
| <b>response to water deprivation (GO:0009414)</b> | 5     | At1g56280,At3g19580,At3g19581 | 10            | 4.7%                               | At5g25610,At5g52310,At2g46505 | 107                | 1.1%                                    | 81.81% 18.19% | 1.4E-02          |
| <b>response to salt stress (GO:0009651)</b>       | 5     | At3g19580,At4g21440,At4g21441 | 13            | 6.1%                               | At4g21440,At1g10940,At5g59560 | 173                | 1.7%                                    | 78.34% 21.66% | 1.4E-02          |
| <b>cofactor catabolic process (GO:0051187)</b>    | 5     | At4g22920,At2g46505,At2g46506 | 5             | 2.4%                               | At4g26970,At2g46505,At4g21440 | 19                 | 0.2%                                    | 92.68% 7.32%  | 1.4E-02          |

**SOM2 - Up progressive**

| Over-represented GO terms                           | Level | Genes in SOM                  | Number in SOM | % of annotated in SOM at the level | Genes in platform             | Number in platform | % of annotated in platform at the level | #1 vs #2      | Adjusted p value |
|-----------------------------------------------------|-------|-------------------------------|---------------|------------------------------------|-------------------------------|--------------------|-----------------------------------------|---------------|------------------|
| response to stress (GO:0006950)                     | 3     | At5g58070,At3g11410,At3g11411 | 55            | 16.4%                              | At1g12780,At1g53670,At3g05210 | 870                | 7.6%                                    | 68.49% 31.51% | 7.4E-06          |
| response to abiotic stimulus (GO:0009628)           | 3     | At5g27150,At5g51000,At5g51001 | 45            | 13.4%                              | At3g53110,At1g54050,At1g54051 | 751                | 6.5%                                    | 67.32% 32.68% | 2.1E-04          |
| <b>circadian rhythm (GO:0007623)</b>                | 3     | At4g25100,At5g16100,At5g16101 | 6             | 1.8%                               | At5g59560,At3g46640,At3g46641 | 29                 | 0.3%                                    | 87.67% 12.33% | 5.9E-03          |
| response to chemical stimulus (GO:0042221)          | 3     | At4g24120,At5g05210,At5g05211 | 49            | 14.6%                              | At3g04730,At1g69190,At4g21440 | 1036               | 9.0%                                    | 61.92% 38.08% | 1.2E-02          |
| <b>autophagy (GO:0006914)</b>                       | 3     | At4g21980,At2g05210,At2g05211 | 4             | 1.2%                               | At5g61500,At4g16520,At2g46505 | 15                 | 0.1%                                    | 90.16% 9.84%  | 1.3E-02          |
| <b>stomatal movement (GO:0010118)</b>               | 3     | At3g11410,At4g05210,At4g05211 | 5             | 1.5%                               | At4g26080,At5g46860,At2g46505 | 28                 | 0.2%                                    | 85.99% 14.01% | 1.4E-02          |
| <b>response to biotic stimulus (GO:0009607)</b>     | 3     | At5g52450,At2g46505,At2g46506 | 20            | 6.0%                               | At1g58340,At4g00860,At4g21440 | 356                | 3.1%                                    | 65.89% 34.11% | 3.8E-02          |
| response to osmotic stress (GO:0006970)             | 4     | At2g46830,At5g27150,At5g27151 | 18            | 5.8%                               | At5g50720,At2g37180,At4g21440 | 191                | 1.7%                                    | 76.84% 23.16% | 1.4E-03          |
| response to water (GO:0009415)                      | 4     | At5g57050,At2g22920,At2g22921 | 12            | 3.8%                               | At5g25610,At5g52310,At2g46505 | 113                | 1.0%                                    | 78.9% 21.1%   | 6.1E-03          |
| <b>response to inorganic substance (GO:0010035)</b> | 4     | At1g07610,At2g46505,At2g46506 | 10            | 3.2%                               | At3g12750,At1g03120,At5g59560 | 82                 | 0.7%                                    | 81.11% 18.89% | 6.1E-03          |
| <b>ureide metabolic process (GO:0010135)</b>        | 4     | At4g04955,At4g21440,At4g21441 | 2             | 0.6%                               |                               | 0                  | 0.0%                                    | 100% 0%       | 1.6E-02          |



|                                                                                    |   |                     |     |       |                               |      |       |        |        |         |
|------------------------------------------------------------------------------------|---|---------------------|-----|-------|-------------------------------|------|-------|--------|--------|---------|
| <b>response to water deprivation (GO:0009414)</b>                                  | 5 | At5g57050,At2g22100 | 12  | 4.1%  | At5g25610,At5g52310,At2g22100 | 105  | 1.0%  | 79.79% | 20.21% | 1.7E-02 |
| <b>response to salt stress (GO:0009651)</b>                                        | 5 | At5g27150,At4g00800 | 16  | 5.5%  | At4g21440,At1g10940,At5g27150 | 170  | 1.7%  | 76.48% | 23.52% | 1.7E-02 |
| Under-represented GO terms                                                         |   |                     |     |       |                               |      |       |        |        |         |
| anatomical structure development (GO:0048856)                                      | 3 | At5g15850,At3g60600 | 10  | 3.0%  | At2g20370,At1g10470,At4g15850 | 15   | 8.1%  | 26.99% | 73.01% | 4.0E-03 |
| reproductive process (GO:0022414)                                                  | 3 | At4g36930,At5g11000 | 5   | 1.5%  | At2g37260,At2g35210,At3g36930 | 19   | 5.1%  | 22.68% | 77.32% | 1.2E-02 |
| primary metabolic process (GO:0044238)                                             | 3 | At1g69410,At1g14000 | 162 | 48.4% | At1g71750,At1g67520,At5g69410 | 5988 | 57.3% | 45.78% | 54.22% | 1.4E-03 |
| <b>nucleobase, nucleoside, nucleotide and nucleic acid metabolism (GO:0009790)</b> | 4 | At1g68190,At3g00200 | 36  | 11.5% | At4g04450,At1g67880,At2g68190 | 2378 | 21.6% | 34.77% | 65.23% | 9.1E-04 |
| <b>embryonic development (GO:0009790)</b>                                          | 4 |                     | 0   | 0.0%  | At5g49820,At5g55940,At1g68190 | 341  | 3.1%  | 0%     | 100%   | 6.1E-03 |
| <b>organelle organization and biogenesis (GO:0009790)</b>                          | 4 | At2g35940,At1g77000 | 4   | 1.3%  | At1g18800,At1g18450,At5g35940 | 557  | 5.1%  | 20.18% | 79.82% | 1.6E-02 |
| reproductive developmental process (GO:0003006)                                    | 4 | At2g46340,At3g44000 | 4   | 1.3%  | At5g10360,At3g61880,At2g46340 | 548  | 5.0%  | 20.44% | 79.56% | 2.1E-02 |
| <b>seed development (GO:0048316)</b>                                               | 6 |                     | 0   | 0.0%  | At1g79860,At3g48750,At2g46340 | 355  | 4.1%  | 0%     | 100%   | 2.1E-02 |
| <b>SOM3</b> - Up early and transient                                               |   |                     |     |       |                               |      |       |        |        |         |

| Over-represented GO terms                                | Level | Genes in SOM        | Number in SOM | % of annotated in SOM at the level | Genes in platform             | Number in platform | % of annotated in platform at the level | #1 vs #2 | Adjusted p value |         |
|----------------------------------------------------------|-------|---------------------|---------------|------------------------------------|-------------------------------|--------------------|-----------------------------------------|----------|------------------|---------|
| <b>aging (GO:0007568)</b>                                | 3     | At2g42620,At1g66000 | 5             | 6.0%                               | At3g49620,At5g24770,At5g42620 | 55                 | 0.5%                                    | 92.8%    | 7.2%             | 3.6E-03 |
| nitrogen compound metabolic process (GO:0006800)         | 3     | At1g03090,At1g66000 | 9             | 10.8%                              | At5g43430,At3g44720,At2g03090 | 387                | 3.3%                                    | 76.73%   | 23.27%           | 3.6E-02 |
| <b>response to endogenous stimulus (GO:0009719)</b>      | 3     | At4g27260,At2g00500 | 14            | 16.9%                              | At4g37680,At2g34680,At4g27260 | 819                | 7.0%                                    | 70.79%   | 29.21%           | 3.6E-02 |
| amino acid and derivative metabolic process (GO:0006755) | 4     | At1g03090,At1g66000 | 10            | 12.8%                              | At2g35500,At2g37040,At3g03090 | 433                | 3.9%                                    | 76.92%   | 23.08%           | 4.5E-02 |
| amine metabolic process (GO:0009308)                     | 4     | At1g64660,At5g00700 | 9             | 11.5%                              | At1g66860,At3g57050,At5g64660 | 336                | 3.0%                                    | 79.45%   | 20.55%           | 4.5E-02 |
| <b>anatomical structure morphogenesis (GO:0009719)</b>   | 4     | At3g45970,At2g20500 | 9             | 11.5%                              | At2g34680,At1g32240,At4g45970 | 376                | 3.3%                                    | 77.55%   | 22.45%           | 4.5E-02 |
| <b>response to organic substance (GO:0010033)</b>        | 4     | At5g64930,At3g11000 | 4             | 5.1%                               | At1g31930,At3g51770,At3g64930 | 65                 | 0.6%                                    | 89.88%   | 10.12%           | 4.5E-02 |
| nitrogen compound catabolic process (GO:0044270)         | 5     | At1g64660,At3g30775 | 6             | 8.1%                               | At1g64660,At3g30775,At1g64660 | 40                 | 0.4%                                    | 95.45%   | 4.55%            | 2.5E-04 |
| amine catabolic process (GO:0009310)                     | 6     | At1g64660,At3g30775 | 6             | 9.2%                               | At3g07570,At1g11860,At5g64660 | 36                 | 0.4%                                    | 95.8%    | 4.2%             | 1.9E-04 |
| <b>amino acid catabolic process (GO:0009063)</b>         | 7     | At1g64660,At3g30775 | 6             | 12.2%                              | At3g07570,At1g11860,At5g64660 | 36                 | 0.5%                                    | 95.93%   | 4.07%            | 1.6E-04 |
| <b>SOM4</b> - Up late                                    |       |                     |               |                                    |                               |                    |                                         |          |                  |         |

| Over-represented GO terms                                                          | Level | Genes in SOM        | Number in SOM | % of annotated in SOM at the level | Genes in platform             | Number in platform | % of annotated in platform at the level | #1 vs #2 | Adjusted p value |         |
|------------------------------------------------------------------------------------|-------|---------------------|---------------|------------------------------------|-------------------------------|--------------------|-----------------------------------------|----------|------------------|---------|
| <b>response to chemical stimulus (GO:0042221)</b>                                  | 3     | At4g21900,At1g77000 | 29            | 17.7%                              | At3g04730,At1g69190,At4g21900 | 1056               | 9.0%                                    | 66.18%   | 33.82%           | 1.1E-02 |
| response to biotic stimulus (GO:0009607)                                           | 3     | At1g64780,At5g60600 | 14            | 8.5%                               | At1g58340,At4g00860,At4g64780 | 362                | 3.1%                                    | 73.38%   | 26.62%           | 1.1E-02 |
| secondary metabolic process (GO:0019748)                                           | 3     | At3g19710,At4g11000 | 13            | 7.9%                               | At5g37170,At3g09710,At1g19710 | 327                | 2.8%                                    | 73.91%   | 26.09%           | 1.1E-02 |
| establishment of localization (GO:0051234)                                         | 3     | At5g13750,At5g50000 | 41            | 21.3%                              | At1g20240,At1g16010,At5g13750 | 1528               | 3.1%                                    | 62.01%   | 37.99%           | 3.4E-02 |
| external encapsulating structure organization and biogenesis (GO:0009719)          | 4     | At5g07430,At3g00500 | 10            | 6.3%                               | At3g06830,At3g45970,At2g07430 | 180                | 1.6%                                    | 79.51%   | 20.49%           | 2.4E-02 |
| <b>response to other organism (GO:0051707)</b>                                     | 4     | At3g28940,At1g77000 | 13            | 8.1%                               | At3g15210,At1g12210,At3g28940 | 326                | 2.9%                                    | 73.58%   | 26.42%           | 2.9E-02 |
| <b>ATP-dependent proteolysis (GO:0006510)</b>                                      | 7     | At1g19740,At1g49000 | 4             | 4.8%                               | At5g47040,At3g05790,At5g19740 | 19                 | 0.3%                                    | 94.53%   | 5.47%            | 4.3E-02 |
| cell wall biosynthetic process (sensu Magnoliophyta) (GO:0009719)                  | 7     | At5g17420,At4g11000 | 5             | 6.0%                               | At4g11150,At2g28110,At2g17420 | 41                 | 0.6%                                    | 90.92%   | 9.08%            | 4.3E-02 |
| <b>secondary cell wall biosynthetic process (sensu Magnoliophyta) (GO:0009719)</b> | 8     | At5g17420,At4g11000 | 5             | 7.9%                               | At2g28110,At3g13890,At4g17420 | 8                  | 0.2%                                    | 98.09%   | 1.91%            | 1.2E-04 |
| Under-represented GO terms                                                         |       |                     |               |                                    |                               |                    |                                         |          |                  |         |

|                                                                                           |   |                     |    |       |                               |      |       |        |        |         |
|-------------------------------------------------------------------------------------------|---|---------------------|----|-------|-------------------------------|------|-------|--------|--------|---------|
| macromolecule metabolic process (GO:0043170)                                              | 3 | At1g12280 At1g71750 | 44 | 26.8% | At4g19820 At3g44240 At3g71750 | 5004 | 42.8% | 38.52% | 61.48% | 1.9E-03 |
| primary metabolic process (GO:0044238)                                                    | 3 | At2g42280 At5g25900 | 69 | 42.1% | At1g71750 At1g67520 At1g67520 | 6689 | 57.2% | 42.37% | 57.63% | 3.8E-03 |
| <b>nucleobase, nucleoside, nucleotide and nucleic acid metabolic process (GO:0019538)</b> | 4 | At1g62990 At5g36940 | 15 | 9.4%  | At4g04450 At1g67880 At2g42280 | 2399 | 21.5% | 30.39% | 69.61% | 1.2E-02 |
| <b>protein metabolic process (GO:0019538)</b>                                             | 4 | At2g31500 At1g22800 | 23 | 14.4% | At5g65450 At5g57990 At3g71750 | 2931 | 26.2% | 35.4%  | 64.6%  | 2.4E-02 |
| <b>biopolymer metabolic process (GO:0043283)</b>                                          | 4 | At1g12280 At1g71750 | 29 | 18.1% | At3g01300 At1g08970 At3g71750 | 3379 | 30.2% | 37.47% | 62.53% | 2.4E-02 |

Enriched GO terms in SOMs of Down-regulated genes

**SOM5** - Down early and sustained

| Over-represented GO terms                                               | Level | Genes in SOM        | Number in SOM | % of annotated in SOM at the level | Genes in platform             | Number in platform | % of annotated in platform at the level | #1 vs #2      | Adjusted p value |
|-------------------------------------------------------------------------|-------|---------------------|---------------|------------------------------------|-------------------------------|--------------------|-----------------------------------------|---------------|------------------|
| biosynthetic process (GO:0009058)                                       | 3     | At1g57720 At3g11720 | 83            | 31.6%                              | At4g26310 At1g71770 At1g71770 | 2006               | 17.3%                                   | 64.58% 35.42% | 1.6E-06          |
| cellular component organization and biogenesis (GO:0044238)             | 3     | At4g14960 At3g55900 | 56            | 21.3%                              | At3g09520 At2g40060 At2g40060 | 1316               | 11.4%                                   | 65.24% 34.76% | 1.6E-04          |
| <b>response to stress (GO:0006950)</b>                                  | 3     | At2g47590 At1g16900 | 34            | 12.9%                              | At1g12780 At1g53670 At3g71750 | 891                | 7.7%                                    | 62.71% 37.29% | 4.5E-02          |
| macromolecule metabolic process (GO:0043170)                            | 3     | At1g32900 At2g36940 | 135           | 51.3%                              | At4g19820,At3g44240,At3g71750 | 4913               | 42.4%                                   | 54.77% 45.23% | 4.5E-02          |
| cellular developmental process (GO:0048869)                             | 3     | At2g27040 At1g07700 | 21            | 8.0%                               | At2g37620 At1g27720 At1g71750 | 473                | 4.1%                                    | 66.17% 33.83% | 4.5E-02          |
| primary metabolic process (GO:0044238)                                  | 3     | At3g52590 At4g24190 | 172           | 65.4%                              | At1g71750,At1g67520,At1g67520 | 6585               | 56.8%                                   | 53.51% 46.49% | 4.7E-02          |
| organelle organization and biogenesis (GO:0006999)                      | 4     | At1g18800 At3g22800 | 42            | 16.5%                              | At1g18450 At5g48030 At4g19820 | 519                | 4.7%                                    | 77.92% 22.08% | 5.2E-10          |
| cellular biosynthetic process (GO:0044249)                              | 4     | At1g57720 At3g11720 | 80            | 31.5%                              | At1g69410 At1g05190 At3g71750 | 1829               | 16.5%                                   | 65.61% 34.39% | 5.1E-07          |
| ribonucleoprotein complex biogenesis and assembly (GO:0044249)          | 4     | At1g48920 At3g11720 | 18            | 7.1%                               | At1g24240 At5g25780 At5g25780 | 158                | 1.4%                                    | 83.25% 16.75% | 3.7E-06          |
| <b>response to temperature stimulus (GO:0009266)</b>                    | 4     | At4g24190 At5g22240 | 15            | 5.9%                               | At2g22240 At4g03430 At3g71750 | 270                | 2.4%                                    | 70.79% 29.21% | 3.4E-02          |
| <b>metabolic compound salvage (GO:0043094)</b>                          | 4     | At4g36940 At5g52590 | 5             | 2.0%                               | At1g49820 At1g49140 At4g19820 | 38                 | 0.3%                                    | 85.16% 14.84% | 4.1E-02          |
| one-carbon compound metabolic process (GO:0006999)                      | 4     | At5g43940 At2g47590 | 6             | 2.4%                               | At3g07610 At3g03300 At5g25780 | 61                 | 0.6%                                    | 81.1% 18.9%   | 4.9E-02          |
| cell differentiation (GO:0030154)                                       | 4     | At2g27040 At1g07700 | 21            | 8.3%                               | At1g26630 At3g09360 At5g25780 | 456                | 4.1%                                    | 66.76% 33.24% | 4.9E-02          |
| <b>ribosome biogenesis and assembly (GO:0042254)</b>                    | 5     | At2g34480 At3g11720 | 18            | 7.6%                               | At1g16740 At5g08180 At3g71750 | 86                 | 0.8%                                    | 89.99% 10.01% | 5.1E-09          |
| macromolecule biosynthetic process (GO:0009059)                         | 5     | At1g57720 At3g11720 | 54            | 22.8%                              | At4g26310 At1g71770 At4g19820 | 1122               | 11.0%                                   | 67.4% 32.6%   | 3.7E-05          |
| chromosome organization and biogenesis (GO:0044238)                     | 5     | At1g54690 At3g22800 | 15            | 6.3%                               | At5g40820 At5g17690 At3g71750 | 1446               | 1.4%                                    | 81.53% 18.47% | 2.4E-04          |
| <b>sulfur compound biosynthetic process (GO:0044238)</b>                | 5     | At3g59760 At3g11720 | 5             | 2.1%                               | At5g04620 At3g22460 At3g71750 | 26                 | 0.3%                                    | 89.2% 10.8%   | 2.4E-02          |
| <b>cell development (GO:0048468)</b>                                    | 5     | At1g07820 At2g27040 | 20            | 8.4%                               | At3g54870 At2g44070 At1g71750 | 388                | 3.8%                                    | 68.89% 31.11% | 3.8E-02          |
| <b>formaldehyde metabolic process (GO:0046292)</b>                      | 5     | At5g43940 At2g47590 | 2             | 0.8%                               | At4g10750                     | 1                  | 0.0%                                    | 98.85% 1.15%  | 4.8E-02          |
| <b>DNA metabolic process (GO:0006259)</b>                               | 5     | At1g18800 At2g47590 | 18            | 7.6%                               | At1g57820 At4g31150 At1g71750 | 347                | 3.4%                                    | 69.02% 30.98% | 4.9E-02          |
| translation (GO:0006412)                                                | 6     | At3g10610 At1g07700 | 43            | 20.9%                              | At2g39990 At1g02780 At3g71750 | 442                | 5.1%                                    | 80.53% 19.47% | 2.9E-12          |
| DNA packaging (GO:0006323)                                              | 6     | At1g18800 At3g22800 | 15            | 7.3%                               | At2g33610 At1g18450 At4g19820 | 117                | 1.3%                                    | 84.5% 15.5%   | 4.2E-05          |
| <b>protein folding (GO:0006457)</b>                                     | 6     | At5g48580 At2g07700 | 18            | 8.7%                               | At5g48030 At1g74250 At1g71750 | 191                | 2.2%                                    | 80.03% 19.97% | 1.3E-04          |
| chromosome organization and biogenesis (sensu lato) (GO:0044238)        | 6     | At5g59870 At5g22800 | 15            | 7.3%                               | At4g13460 At3g04380 At3g71750 | 139                | 1.6%                                    | 82.1% 17.9%   | 1.5E-04          |
| cellular component assembly (GO:0022607)                                | 6     | At1g54690 At3g22800 | 17            | 8.3%                               | At5g25780 At5g27670 At1g71750 | 215                | 2.5%                                    | 77.07% 22.93% | 1.1E-03          |
| biopolymer biosynthetic process (GO:0043284)                            | 6     | At1g32900 At5g11720 | 10            | 4.9%                               | At3g25140 At1g02730 At3g71750 | 114                | 1.3%                                    | 78.86% 21.14% | 2.4E-02          |
| establishment and/or maintenance of chromatin architecture (GO:0044238) | 7     | At1g18800 At3g22800 | 15            | 11.4%                              | At2g33610 At1g18450 At4g19820 | 117                | 1.7%                                    | 86.93% 13.07% | 8.7E-06          |
| <b>translational elongation (GO:0006414)</b>                            | 7     | At4g11120 At1g57720 | 7             | 5.3%                               | At5g24510 At1g35550 At1g71750 | 27                 | 0.4%                                    | 93.08% 6.92%  | 5.4E-04          |
| macromolecule complex assembly (GO:0065003)                             | 7     | At1g18800 At3g22800 | 15            | 11.4%                              | At3g05210 At2g24060 At2g40060 | 200                | 2.9%                                    | 79.56% 20.44% | 1.6E-03          |
| chromatin assembly or disassembly (GO:0006333)                          | 8     | At1g18800 At3g22800 | 15            | 15.2%                              | At5g65360 At4g40040 At1g71750 | 67                 | 1.3%                                    | 91.98% 8.02%  | 9.3E-09          |

|                                                       |   |                  |    |       |                         |      |       |        |        |         |
|-------------------------------------------------------|---|------------------|----|-------|-------------------------|------|-------|--------|--------|---------|
| <b>protein-DNA complex assembly (GO:0065004)</b>      | 8 | At1g18800 At3g20 | 13 | 13.1% | At5g02560 At5g12910 At3 | 55   | 1.5%  | 89.77% | 10.23% | 2.0E-06 |
| <b>chromatin assembly (GO:0031497)</b>                | 9 | At4g13940 At1g74 | 15 | 23.1% | At5g02560 At5g12910 At3 | 55   | 2.2%  | 91.27% | 8.73%  | 1.9E-08 |
| Under-represented GO terms                            |   |                  |    |       |                         |      |       |        |        |         |
| regulation of biological process (GO:0050789)         | 3 | At5g37020 At5g10 | 20 | 7.6%  | At1g68090 At3g53310 At4 | 1977 | 17.1% | 30.83% | 69.17% | 2.6E-04 |
| phosphorus metabolic process (GO:0006793)             | 4 | At4g32210 At3g49 | 4  | 1.6%  | At3g52890 At5g12090 At1 | 1007 | 9.1%  | 14.77% | 85.23% | 6.2E-05 |
| regulation of metabolic process (GO:0019222)          | 4 | At5g22650 At2g27 | 15 | 5.9%  | At2g22750 At4g11400 At1 | 1576 | 14.2% | 29.34% | 70.66% | 1.2E-03 |
| regulation of cellular process (GO:0050794)           | 4 | At5g37020 At5g10 | 18 | 7.1%  | At3g53310 At2g43060 At5 | 1760 | 15.9% | 30.85% | 69.15% | 1.2E-03 |
| biopolymer metabolic process (GO:0043283)             | 4 | At1g32900 At5g10 | 53 | 20.9% | At3g01300,At1g08970,At3 | 3355 | 30.3% | 40.8%  | 59.2%  | 2.2E-02 |
| biopolymer modification (GO:0043412)                  | 5 | At3g52590 At1g70 | 9  | 3.8%  | At2g35510 At2g35160 At2 | 1603 | 15.8% | 19.43% | 80.57% | 1.6E-06 |
| phosphate metabolic process (GO:0006796)              | 5 | At4g32210 At3g49 | 4  | 1.7%  | At3g52890 At5g12090 At1 | 1006 | 9.9%  | 14.59% | 85.41% | 8.3E-05 |
| transcription (GO:0006350)                            | 5 | At5g60470 At1g74 | 14 | 5.9%  | At1g76510 At1g80390 At1 | 1560 | 15.3% | 27.82% | 72.18% | 7.0E-04 |
| regulation of cellular metabolic process (GO:00313    | 5 | At5g40350 At5g10 | 15 | 6.3%  | At3g54620 At3g60390 At2 | 1556 | 15.3% | 29.3%  | 70.7%  | 2.0E-03 |
| <b>peptide/protein amino-terminal blocking (GO:00</b> | 5 | At1g70490        | 1  | 0.4%  | At1g05870 At1g69880 At2 | 397  | 3.9%  | 9.76%  | 90.24% | 4.8E-02 |
| protein modification (GO:0006464)                     | 6 | At1g16190 At3g52 | 8  | 3.9%  | At2g45910 At5g40880 At4 | 1560 | 17.8% | 17.9%  | 82.1%  | 4.9E-07 |
| phosphorylation (GO:0016310)                          | 6 | At4g32210 At3g49 | 4  | 1.9%  | At2g02780 At1g64210 At5 | 956  | 10.9% | 15.1%  | 84.9%  | 1.5E-04 |
| regulation of nucleobase, nucleoside, nucleotide ar   | 6 | At5g22650 At2g27 | 13 | 6.3%  | At2g22750 At4g11400 At1 | 1502 | 17.2% | 26.9%  | 73.1%  | 4.4E-04 |
| <b>lipoprotein metabolic process (GO:0042157)</b>     | 6 | At1g70490        | 1  | 0.5%  | At3g06270 At5g22130 At5 | 412  | 4.7%  | 9.35%  | 90.65% | 4.4E-02 |
| post-translational protein modification (GO:004368    | 7 | At3g52590 At3g49 | 6  | 4.6%  | At3g62250 At3g54790 At4 | 1120 | 16.4% | 21.75% | 78.25% | 6.4E-03 |
| <b>regulation of transcription (GO:0045449)</b>       | 7 | At5g37020 At5g20 | 13 | 9.9%  | At5g45710 At4g31680 At1 | 1484 | 21.7% | 31.25% | 68.75% | 4.6E-02 |
| <b>protein amino acid phosphorylation (GO:00064</b>   | 8 | At3g49670 At5g10 | 3  | 3.0%  | At2g45910 At4g01330 At1 | 885  | 17.2% | 14.98% | 85.02% | 4.9E-03 |
| <b>SOM6 - Down progressive</b>                        |   |                  |    |       |                         |      |       |        |        |         |

| Over-represented GO terms                            | Level | Genes in SOM     | Number in SOM | % of annotated in SOM at the level | Genes in platform        | Number in platform | % of annotated in platform at the level | #1 vs #2 | Adjusted p value |          |
|------------------------------------------------------|-------|------------------|---------------|------------------------------------|--------------------------|--------------------|-----------------------------------------|----------|------------------|----------|
| biosynthetic process (GO:0009058)                    | 3     | At2g37600 At5g40 | 176           | 54.0%                              | At4g26310 At1g71770 At1  | 1913               | 16.6%                                   | 76.49%   | 23.51%           | 1.1E-49  |
| macromolecule metabolic process (GO:0043170)         | 3     | At3g24830 At4g   | 200           | 61.4%                              | At4g19820 At3g44240 At3  | 4848               | 42.1%                                   | 59.33%   | 40.67%           | 1.7E-10  |
| primary metabolic process (GO:0044238)               | 3     | At4g35630 At3g00 | 239           | 73.3%                              | At1g71750 At1g67520 At1  | 6519               | 56.6%                                   | 56.45%   | 43.55%           | 1.4E-08  |
| cellular component organization and biogenesis (G    | 3     | At4g02150 At1g40 | 71            | 21.8%                              | t3g09520 At2g40060 At2g0 | 1300               | 11.3%                                   | 65.88%   | 34.12%           | 1.1E-06  |
| cellular metabolic process (GO:0044237)              | 3     | At4g35630 At3g00 | 248           | 76.1%                              | At1g71750 At1g67520 At5  | 7234               | 62.8%                                   | 54.8%    | 45.2%            | 4.8E-06  |
| cellular biosynthetic process (GO:0044249)           | 4     | At4g35630 At3g00 | 171           | 52.9%                              | At1g69410 At1g05190 At3  | 1738               | 15.8%                                   | 77.03%   | 22.97%           | 3.0E-49  |
| ribonucleoprotein complex biogenesis and assemb      | 4     | At3g06700 At1g60 | 44            | 13.6%                              | At1g24240 At5g25780 At5  | 132                | 1.2%                                    | 91.91%   | 8.09%            | 9.5E-28  |
| cellular macromolecule metabolic process (GO:00      | 4     | At3g09200 At5g10 | 178           | 55.1%                              | At1g69410 At5g47070 At1  | 2873               | 26.1%                                   | 67.87%   | 32.13%           | 1.1E-25  |
| protein metabolic process (GO:0019538)               | 4     | At5g47930 At5g40 | 169           | 52.3%                              | At5g65450 At5g57990 At3  | 2785               | 25.3%                                   | 67.41%   | 32.59%           | 8.9E-23  |
| organelle organization and biogenesis (GO:000690     | 4     | At3g49010 At5g00 | 52            | 16.1%                              | At1g18800 At1g18450 At5  | 744                | 4.6%                                    | 77.69%   | 22.31%           | 7.4E-13  |
| <b>urea cycle intermediate metabolic process (GO</b> | 4     | At3g57560 At3g27 | 3             | 0.9%                               | At4g08900 At4g24830 At2  | 9                  | 0.1%                                    | 91.91%   | 8.09%            | 4.5E-02  |
| macromolecule biosynthetic process (GO:0009059       | 5     | At2g37600 At5g40 | 149           | 48.7%                              | At4g26310 At1g71770 At4  | 1027               | 10.2%                                   | 82.74%   | 17.26%           | 1.2E-59  |
| <b>ribosome biogenesis and assembly (GO:004220</b>   | 5     | At5g08180 At3g50 | 43            | 14.1%                              | At1g16740 At1g64510 At3  | 61                 | 0.6%                                    | 95.88%   | 4.12%            | 7.4E-37  |
| cellular protein metabolic process (GO:0044267)      | 5     | At1g16740 At1g60 | 61            | 55.2%                              | At1g69410 At5g47070 At1  | 2749               | 27.2%                                   | 67.01%   | 32.99%           | 3.8E-22  |
| translation (GO:0006412)                             | 6     | At1g02780 At1g50 | 137           | 49.1%                              | At2g39990 At3g02660 At1  | 348                | 4.0%                                    | 92.46%   | 7.54%            | 2.6E-100 |
| biopolymer biosynthetic process (GO:0043284)         | 6     | At3g09200 At3g20 | 14            | 5.0%                               | At3g25140 At1g32900 At1  | 110                | 1.3%                                    | 79.85%   | 20.15%           | 1.9E-03  |
| <b>translational elongation (GO:0006414)</b>         | 7     | At3g09200 At3g20 | 8             | 6.5%                               | At5g24510 At1g35550 At4  | 26                 | 0.4%                                    | 94.49%   | 5.51%            | 3.8E-05  |
| <b>amino acid biosynthetic process (GO:0008652)</b>  | 7     | At1g29900 At4g27 | 10            | 8.1%                               | At5g13280 At2g43750 At1  | 106                | 1.9%                                    | 81.33%   | 18.67%           | 2.0E-02  |

Under-represented GO terms

|                                                        |   |                  |    |       |                         |      |       |        |        |         |
|--------------------------------------------------------|---|------------------|----|-------|-------------------------|------|-------|--------|--------|---------|
| regulation of biological process (GO:0050789)          | 3 | At2g37120 At1g22 | 18 | 5.5%  | At4g26310 At1g71770 At1 | 1913 | 17.2% | 24.33% | 75.67% | 1.4E-08 |
| establishment of localization (GO:0051234)             | 3 | At2g39010 At2g22 | 20 | 6.1%  | At1g20240 At1g16010 At5 | 1543 | 13.4% | 31.43% | 68.57% | 3.6E-04 |
| cell communication (GO:0007154)                        | 3 | At3g56070 At4g22 | 10 | 3.1%  | At3g06640 At3g45640 At1 | 834  | 7.2%  | 29.77% | 70.23% | 1.6E-02 |
| biopolymer metabolic process (GO:0043283)              | 4 | At3g62250 At4g22 | 44 | 13.6% | At3g01300 At1g08970 At3 | 3364 | 30.6% | 30.84% | 69.16% | 6.9E-11 |
| nucleobase, nucleoside, nucleotide and nucleic aci     | 4 | At3g50060 At3g52 | 25 | 7.7%  | At4g04450 At1g67880 At2 | 2389 | 21.7% | 26.29% | 73.71% | 6.2E-10 |
| regulation of metabolic process (GO:0019222)           | 4 | At5g45750 At4g02 | 12 | 3.7%  | At2g22750 At4g11400 At1 | 1579 | 14.3% | 20.58% | 79.42% | 1.6E-08 |
| phosphorus metabolic process (GO:0006793)              | 4 | At5g27450 At4g22 | 4  | 1.2%  | At3g52890 At5g12090 At1 | 1007 | 9.2%  | 11.93% | 88.07% | 6.7E-08 |
| regulation of cellular process (GO:0050794)            | 4 | At2g37120 At1g22 | 17 | 5.3%  | At3g53310 At2g43060 At5 | 1761 | 16.0% | 24.76% | 75.24% | 8.4E-08 |
| transport (GO:0006810)                                 | 4 | At3g28860 At5g02 | 20 | 6.2%  | At5g37860 At1g14670 At5 | 1526 | 13.9% | 30.88% | 69.12% | 3.0E-04 |
| <b>signal transduction (GO:0007165)</b>                | 4 | At3g56070 At4g22 | 9  | 2.8%  | At3g06640 At3g45640 At1 | 771  | 7.0%  | 28.46% | 71.54% | 1.9E-02 |
| regulation of cellular metabolic process (GO:00313     | 5 | At4g04890 At4g02 | 12 | 3.9%  | At3g54620 At3g60390 At2 | 1558 | 15.4% | 20.29% | 79.71% | 2.7E-08 |
| biopolymer modification (GO:0043412)                   | 5 | At3g62250 At4g22 | 13 | 4.3%  | At2g35510 At2g35160 At2 | 1599 | 15.8% | 21.18% | 78.82% | 3.3E-08 |
| <b>transcription (GO:0006350)</b>                      | 5 | At3g50060 At5g42 | 13 | 4.3%  | At1g76510 At1g80390 At1 | 1561 | 15.4% | 21.58% | 78.42% | 5.9E-08 |
| phosphate metabolic process (GO:0006796)               | 5 | At5g27450 At4g22 | 4  | 1.3%  | At3g52890 At5g12090 At1 | 1006 | 10.0% | 11.61% | 88.39% | 7.7E-08 |
| RNA metabolic process (GO:0016070)                     | 5 | At4g17460 At3g42 | 11 | 3.6%  | At5g66980 At1g51600 At2 | 1169 | 11.6% | 23.72% | 76.28% | 5.6E-05 |
| <b>ion transport (GO:0006811)</b>                      | 5 | At1g22990        | 1  | 0.3%  | At5g37860 At5g62670 At5 | 370  | 3.7%  | 8.2%   | 91.8%  | 1.4E-02 |
| protein modification (GO:0006464)                      | 6 | At4g19985 At3g62 | 12 | 4.3%  | At2g45910 At5g40880 At4 | 1556 | 17.9% | 19.36% | 80.64% | 4.0E-09 |
| <b>regulation of nucleobase, nucleoside, nucleotic</b> | 6 | At5g45750 At4g02 | 12 | 4.3%  | At2g22750 At4g11400 At1 | 1503 | 17.3% | 19.91% | 80.09% | 1.4E-08 |
| <b>phosphorylation (GO:0016310)</b>                    | 6 | At5g50000 At5g12 | 4  | 1.4%  | At2g02780 At1g64210 At5 | 956  | 11.0% | 11.52% | 88.48% | 1.4E-07 |
| <b>RNA biosynthetic process (GO:0032774)</b>           | 6 | At4g04890 At4g02 | 7  | 2.5%  | At3g09370 At5g60450 At3 | 877  | 10.1% | 19.9%  | 80.1%  | 1.5E-04 |
| <b>post-translational protein modification (GO:004</b> | 7 | At3g62250 At4g22 | 5  | 4.1%  | At3g54790 At4g31100 At5 | 1121 | 16.3% | 19.92% | 80.08% | 1.1E-02 |
| <b>SOM8 - Down late</b>                                |   |                  |    |       |                         |      |       |        |        |         |

| Over-represented GO term        | Level | Genes in SOM     | Number in SOM | % of annotated in SOM at the level | Genes in platform       | Number in platform | % of annotated in platform at the level | #1 vs #2      | Adjusted p value |
|---------------------------------|-------|------------------|---------------|------------------------------------|-------------------------|--------------------|-----------------------------------------|---------------|------------------|
| <b>translation (GO:0006412)</b> | 6     | At5g24510 At1g22 | 13            | 21.7%                              | At2g39990 At1g02780 At3 | 472                | 5.3%                                    | 80.34% 19.66% | 5.6E-03          |

**Table S6. Enriched GO terms within the genes up-regulated from 0-1 to 2-3 DPA**

Over-represented and under-represented GO terms within the genes identified as up-regulated from 0-1 DPA to 2-3 DPA. In black, non-redundant GO terms. Significant enriched GO terms were considered when adjusted p value < 0.05. GO level of the term; AGI, number and percentage of genes included in 2-3 dpa up-regulated genes at the level; AGI, number and percentage of genes included platform at the level; and adjusted p value of significance are shown.

| Over-represented GO terms                                       | Level | Genes 2-3 DPA Up    | Number in 2-3 DPA Up | % of annotated in 2-3 Up at the level | Genes in platform                                                                                                                                                                                                 | Number in platform | % of annotated in platform at the level | 2-3 DPA Up vs Platform | Adjusted p value |
|-----------------------------------------------------------------|-------|---------------------|----------------------|---------------------------------------|-------------------------------------------------------------------------------------------------------------------------------------------------------------------------------------------------------------------|--------------------|-----------------------------------------|------------------------|------------------|
| aging (GO:0007568)                                              | 3     | At2g42620 At1g6616  | 16                   | 3.6%                                  | At3g49620 At5g24770 At5g53110 At1g54050 At1g53670 At3g05210 At3g04730 At1g69190 At4g21440 At5g58140 At3g10740 At1g27170 At1g77440 At1g21980 At4g16150 At5g61500 At2g44140 At2g19140 At4g30670 At5g19140 At4g30670 | 44                 | 0.4%                                    | 90.19% 9.81%           | 2.8E-08          |
| response to abiotic stimulus (GO:0009628)                       | 3     | At4g35770 At2g27170 | 66                   | 14.6%                                 | At3g53110 At1g54050 At1g53670 At3g05210 At3g04730 At1g69190 At4g21440 At5g58140 At3g10740 At1g27170 At1g77440 At1g21980 At4g16150 At5g61500 At2g44140 At2g19140 At4g30670 At5g19140 At4g30670                     | 730                | 6.4%                                    | 69.56% 30.44%          | 5.9E-08          |
| response to stress (GO:0006950)                                 | 3     | At1g12780 At2g30670 | 71                   | 15.7%                                 | At1g53670 At3g05210 At3g04730 At1g69190 At4g21440 At5g58140 At3g10740 At1g27170 At1g77440 At1g21980 At4g16150 At5g61500 At2g44140 At2g19140 At4g30670 At5g19140 At4g30670                                         | 854                | 7.5%                                    | 67.76% 32.24%          | 1.8E-07          |
| response to chemical stimulus (GO:0042221)                      | 3     | At4g37790 At1g54050 | 75                   | 16.6%                                 | At3g04730 At1g69190 At4g21440 At5g58140 At3g10740 At1g27170 At1g77440 At1g21980 At4g16150 At5g61500 At2g44140 At2g19140 At4g30670 At5g19140 At4g30670                                                             | 1010               | 8.9%                                    | 65.24% 34.76%          | 4.1E-06          |
| response to external stimulus (GO:0009605)                      | 3     | At4g35770 At4g00670 | 22                   | 4.9%                                  | At4g21440 At5g58140 At3g10740 At1g27170 At1g77440 At1g21980 At4g16150 At5g61500 At2g44140 At2g19140 At4g30670 At5g19140 At4g30670                                                                                 | 186                | 1.6%                                    | 74.94% 25.06%          | 1.7E-04          |
| catabolic process (GO:0009056)                                  | 3     | At3g10740 At1g27170 | 43                   | 9.5%                                  | At1g71770 At1g77440 At1g21980 At4g16150 At5g61500 At2g44140 At2g19140 At4g30670 At5g19140 At4g30670                                                                                                               | 545                | 4.8%                                    | 66.61% 33.39%          | 3.4E-04          |
| <b>autophagy (GO:0006914)</b>                                   | 3     | At4g21980 At4g16150 | 6                    | 1.3%                                  | At5g61500 At2g44140 At2g19140 At4g30670 At5g19140 At4g30670                                                                                                                                                       | 13                 | 0.1%                                    | 92.11% 7.89%           | 4.5E-04          |
| response to endogenous stimulus (GO:0009719)                    | 3     | At5g19140 At4g30670 | 52                   | 11.5%                                 | At4g37680 At2g34680 At4g21440 At5g58140 At3g10740 At1g27170 At1g77440 At1g21980 At4g16150 At5g61500 At2g44140 At2g19140 At4g30670 At5g19140 At4g30670                                                             | 781                | 6.9%                                    | 62.73% 37.27%          | 3.4E-03          |
| cellular response to stimulus (GO:0051716)                      | 3     | At2g45170 At3g47170 | 6                    | 1.3%                                  | At1g73730 At1g66270 At3g10740 At1g27170 At1g77440 At1g21980 At4g16150 At5g61500 At2g44140 At2g19140 At4g30670 At5g19140 At4g30670                                                                                 | 25                 | 0.2%                                    | 85.85% 14.15%          | 6.4E-03          |
| response to water (GO:0009415)                                  | 4     | At2g21620 At1g56160 | 22                   | 5.2%                                  | At5g25610 At5g52310 At2g19140 At4g30670 At5g19140 At4g30670                                                                                                                                                       | 103                | 0.9%                                    | 84.57% 15.43%          | 1.7E-07          |
| response to osmotic stress (GO:0006970)                         | 4     | At2g33380 At3g47170 | 24                   | 5.7%                                  | At5g50720 At2g37180 At4g21440 At5g58140 At3g10740 At1g27170 At1g77440 At1g21980 At4g16150 At5g61500 At2g44140 At2g19140 At4g30670 At5g19140 At4g30670                                                             | 185                | 1.7%                                    | 76.9% 23.1%            | 7.2E-05          |
| cellular catabolic process (GO:0044248)                         | 4     | At1g27980 At1g66160 | 35                   | 9.7%                                  | At5g41240 At1g65120 At2g19140 At4g30670 At5g19140 At4g30670                                                                                                                                                       | 524                | 4.8%                                    | 66.76% 33.24%          | 2.5E-03          |
| response to extracellular stimulus (GO:0009991)                 | 4     | At5g54730 At2g47170 | 8                    | 1.9%                                  | At3g23430 At1g78380 At3g10740 At1g27170 At1g77440 At1g21980 At4g16150 At5g61500 At2g44140 At2g19140 At4g30670 At5g19140 At4g30670                                                                                 | 31                 | 0.3%                                    | 84.73% 15.27%          | 5.5E-03          |
| response to organic substance (GO:0010033)                      | 4     | At5g64930 At3g47170 | 10                   | 2.4%                                  | At1g31930 At3g51770 At3g10740 At1g27170 At1g77440 At1g21980 At4g16150 At5g61500 At2g44140 At2g19140 At4g30670 At5g19140 At4g30670                                                                                 | 59                 | 0.5%                                    | 81.31% 18.69%          | 5.5E-03          |
| response to hormone stimulus (GO:0009725)                       | 4     | At5g19140 At4g30670 | 39                   | 9.2%                                  | At4g37680 At2g34680 At4g21440 At5g58140 At3g10740 At1g27170 At1g77440 At1g21980 At4g16150 At5g61500 At2g44140 At2g19140 At4g30670 At5g19140 At4g30670                                                             | 540                | 5.0%                                    | 64.96% 35.04%          | 8.5E-03          |
| <b>response to inorganic substance (GO:0010033)</b>             | 4     | At1g07610 At5g00670 | 11                   | 2.6%                                  | At3g12750 At1g03120 At5g19140 At4g30670                                                                                                                                                                           | 81                 | 0.7%                                    | 77.71% 22.29%          | 1.1E-02          |
| <b>multicellular organismal aging (GO:0010259)</b>              | 4     | At5g45890 At5g66160 | 5                    | 1.2%                                  | At3g52430 At5g17290 At1g23010 At3g52190 At3g10740 At1g27170 At1g77440 At1g21980 At4g16150 At5g61500 At2g44140 At2g19140 At4g30670 At5g19140 At4g30670                                                             | 16                 | 0.2%                                    | 88.91% 11.09%          | 1.4E-02          |
| response to water deprivation (GO:0009414)                      | 5     | At2g21620 At1g56160 | 22                   | 5.6%                                  | At5g25610 At5g52310 At2g19140 At4g30670 At5g19140 At4g30670                                                                                                                                                       | 95                 | 1.0%                                    | 85.49% 14.51%          | 1.1E-07          |
| <b>response to abscisic acid stimulus (GO:0009725)</b>          | 5     | At1g76180 At3g10740 | 24                   | 6.1%                                  | At4g21440 At5g23720 At5g58140 At3g10740 At1g27170 At1g77440 At1g21980 At4g16150 At5g61500 At2g44140 At2g19140 At4g30670 At5g19140 At4g30670                                                                       | 176                | 1.8%                                    | 77.62% 22.38%          | 8.1E-05          |
| <b>response to salt stress (GO:0009651)</b>                     | 5     | At3g19580 At4g30670 | 22                   | 5.6%                                  | At4g21440 At1g10940 At5g58140 At3g10740 At1g27170 At1g77440 At1g21980 At4g16150 At5g61500 At2g44140 At2g19140 At4g30670 At5g19140 At4g30670                                                                       | 164                | 1.6%                                    | 77.34% 22.66%          | 2.1E-04          |
| nitrogen compound catabolic process (GO:0044248)                | 5     | At1g64660 At3g47170 | 10                   | 2.5%                                  | At3g07570 At1g11860 At5g58140 At3g10740 At1g27170 At1g77440 At1g21980 At4g16150 At5g61500 At2g44140 At2g19140 At4g30670 At5g19140 At4g30670                                                                       | 36                 | 0.4%                                    | 87.6% 12.4%            | 5.0E-04          |
| energy reserve metabolic process (GO:0006112)                   | 5     | At1g70290 At1g30670 | 6                    | 1.5%                                  | At4g27550 At5g10100 At4g21440 At5g58140 At3g10740 At1g27170 At1g77440 At1g21980 At4g16150 At5g61500 At2g44140 At2g19140 At4g30670 At5g19140 At4g30670                                                             | 19                 | 0.2%                                    | 88.93% 11.07%          | 1.2E-02          |
| response to carbohydrate stimulus (GO:0009743)                  | 5     | At4g35770 At5g56160 | 10                   | 2.5%                                  | At4g37680 At5g67030 At3g10740 At1g27170 At1g77440 At1g21980 At4g16150 At5g61500 At2g44140 At2g19140 At4g30670 At5g19140 At4g30670                                                                                 | 58                 | 0.6%                                    | 81.43% 18.57%          | 1.2E-02          |
| organ senescence (GO:0010260)                                   | 5     | At5g45890 At5g66160 | 5                    | 1.3%                                  | At3g52430 At5g11520 At5g19140 At4g30670                                                                                                                                                                           | 11                 | 0.1%                                    | 92.04% 7.96%           | 1.2E-02          |
| response to nutrient levels (GO:0031667)                        | 5     | At2g45170 At3g47170 | 7                    | 1.8%                                  | At1g23010 At3g52190 At3g10740 At1g27170 At1g77440 At1g21980 At4g16150 At5g61500 At2g44140 At2g19140 At4g30670 At5g19140 At4g30670                                                                                 | 29                 | 0.3%                                    | 86% 14%                | 1.3E-02          |
| senescence (sensu Magnoliophyta) (GO:0010144)                   | 5     | At5g45890 At5g66160 | 5                    | 1.3%                                  | At3g52430 At5g17290 At1g23010 At3g52190 At3g10740 At1g27170 At1g77440 At1g21980 At4g16150 At5g61500 At2g44140 At2g19140 At4g30670 At5g19140 At4g30670                                                             | 15                 | 0.2%                                    | 89.45% 10.55%          | 2.5E-02          |
| <b>cellular response to extracellular stimulus (GO:0009725)</b> | 5     | At2g45170 At3g47170 | 6                    | 1.5%                                  | At1g23010 At3g52190 At3g10740 At1g27170 At1g77440 At1g21980 At4g16150 At5g61500 At2g44140 At2g19140 At4g30670 At5g19140 At4g30670                                                                                 | 25                 | 0.3%                                    | 85.93% 14.07%          | 2.9E-02          |
| <b>response to desiccation (GO:0009269)</b>                     | 6     | At2g21620 At1g76160 | 7                    | 2.1%                                  | At5g25610 At5g52310 At3g10740 At1g27170 At1g77440 At1g21980 At4g16150 At5g61500 At2g44140 At2g19140 At4g30670 At5g19140 At4g30670                                                                                 | 10                 | 0.1%                                    | 94.65% 5.35%           | 5.9E-04          |
| amine catabolic process (GO:0009310)                            | 6     | At1g64660 At3g47170 | 9                    | 2.6%                                  | At3g07570 At1g11860 At5g58140 At3g10740 At1g27170 At1g77440 At1g21980 At4g16150 At5g61500 At2g44140 At2g19140 At4g30670 At5g19140 At4g30670                                                                       | 33                 | 0.4%                                    | 87.34% 12.66%          | 4.3E-03          |
| organ senescence (sensu Magnoliophyta) (GO:0010144)             | 6     | At5g45890 At5g66160 | 5                    | 1.5%                                  | At3g52430 At5g11520 At5g19140 At4g30670                                                                                                                                                                           | 10                 | 0.1%                                    | 92.67% 7.33%           | 1.5E-02          |
| <b>response to starvation (GO:0042594)</b>                      | 6     | At1g54710 At5g56160 | 7                    | 2.1%                                  | At1g09020 At3g49620 At2g19140 At4g30670 At5g19140 At4g30670                                                                                                                                                       | 26                 | 0.3%                                    | 87.19% 12.81%          | 1.5E-02          |

|                                                     |                    |    |      |                         |    |      |        |        |         |
|-----------------------------------------------------|--------------------|----|------|-------------------------|----|------|--------|--------|---------|
| <b>response to sucrose stimulus (GO:0009744)</b>    | 6 At4g35770 At5g20 | 7  | 2.1% | At4g37680 At4g01900 At4 | 27 | 0.3% | 86.77% | 13.23% | 1.6E-02 |
| amino acid catabolic process (GO:0009063)           | 7 At1g64660 At3g44 | 9  | 3.6% | At3g07570 At1g11860 At5 | 33 | 0.5% | 88.1%  | 11.9%  | 5.2E-03 |
| <b>response to absence of light (GO:0009646)</b>    | 7 At2g41100 At2g38 | 4  | 1.6% | At5g20230 At1g64520 At5 | 5  | 5.0% | 95.6%  | 4.4%   | 2.4E-02 |
| <b>leaf senescence (GO:0010150)</b>                 | 7 At5g45890 At5g64 | 5  | 2.0% | At3g52430 At5g11520 At5 | 10 | 0.2% | 93.14% | 6.86%  | 2.4E-02 |
| disaccharide metabolic process (GO:0005984)         | 7 At5g56870 At1g70 | 10 | 4.0% | At1g04920 At2g40840 At5 | 66 | 1.0% | 80.45% | 19.55% | 2.7E-02 |
| branched chain family amino acid metabolic pro      | 7 At3g45300 At2g33 | 6  | 2.4% | At3g45300 At2g31810 At4 | 21 | 0.3% | 88.58% | 11.42% | 2.7E-02 |
| <b>branched chain family amino acid catabolic p</b> | 8 At3g45300 At4g34 | 4  | 2.1% | At5g65940 At5g43430     | 2  | 0.0% | 98.13% | 1.87%  | 1.2E-02 |
| <b>trehalose metabolic process (GO:0005991)</b>     | 8 At1g70290 At1g33 | 6  | 3.1% | At5g51460 At4g27550 At5 | 16 | 0.3% | 90.8%  | 9.2%   | 2.4E-02 |

Under-represented GO terms

|                                                    |                    |    |       |                         |      |       |        |        |         |
|----------------------------------------------------|--------------------|----|-------|-------------------------|------|-------|--------|--------|---------|
| <b>cellular component organization and biogeni</b> | 3 At4g24570 At5g55 | 32 | 7.1%  | At3g09520 At2g40060 At2 | 1339 | 11.7% | 37.66% | 62.34% | 9.5E-03 |
| <b>reproductive process (GO:0022414)</b>           | 3 At4g37300 At4g02 | 10 | 2.2%  | At2g37260 At2g35210 At3 | 581  | 5.1%  | 30.32% | 69.68% | 2.1E-02 |
| <b>protein localization (GO:0008104)</b>           | 3 At1g09070 At5g43 | 4  | 0.9%  | At3g61450 At4g35450 At3 | 325  | 2.9%  | 23.73% | 76.27% | 4.0E-02 |
| <b>nucleobase, nucleoside, nucleotide and nucl</b> | 4 At3g13445 At4g33 | 60 | 14.1% | At4g04450 At1g67880 At2 | 2354 | 21.6% | 39.55% | 60.45% | 4.8E-03 |
| <b>translation (GO:0006412)</b>                    | 6 At3g06040 At1g13 | 4  | 1.2%  | At2g39990 At1g02780 At3 | 481  | 5.6%  | 17.38% | 82.62% | 9.2E-03 |

**Table S7. Genes contributing to the second PC but not on the first PC in the PCA over the differentially expressed genes from the complete dataset**

Genes contributing to the second principal component ([PC2 Score]>1.3) but not on the first principal component ([PC1 Score]<1.3) on the PCA over the differentially expressed genes in the complete dataset. Normalized Log2 (mean ratio relative to 0-1 DPA mean), Scores in the first and in the second principal components in the PCA analysis, and 3% FDR multiclass SAM Score (d) and q value are shown.

| Oligo ID   | AGI              | Annotation                                       | PC2 Score | PC1 Score | 0-1 DPA Mean | 2-3 DPA Mean | 4-5 DPA Mean | 6-7 DPA Mean | 8-9 DPA Mean | 10-11 DPA Mean | 12-14 DPA Mean | Score(d) SAM MC (FDR 3%) | q-value SAM MC (FDR 3%) |
|------------|------------------|--------------------------------------------------|-----------|-----------|--------------|--------------|--------------|--------------|--------------|----------------|----------------|--------------------------|-------------------------|
| A002643_01 | At1g12010        | putative amino-cyclopropane-carboxylic acid c    | 3.70      | 0.89      | 0            | 3.77         | 3.34         | 1.71         | 0.33         | -0.08          | -0.08          | 0.3                      | 0.96                    |
| A007797_01 | At2g32150        | putative hydrolase; protein id: At2g32150.1      | 3.37      | 0.93      | 0            | 3.64         | 2.80         | 1.45         | 0.45         | 0.11           | 0.10           | 0.4                      | 0.86                    |
| A024259_01 | At3g48340        | AtCEP2; cysteine proteinase; protein id: At3g4   | 3.26      | 0.32      | 0            | 3.46         | 3.41         | 1.97         | 0.86         | 0.24           | 1.10           | 0.1                      | 1.28                    |
| A008562_01 | At2g02990        | ribonuclease, RNS1; protein id: At2g02990.1      | 3.26      | 0.46      | 0            | 3.56         | 3.18         | 1.69         | 0.87         | 0.06           | 0.97           | 0.3                      | 0.95                    |
| A005155_01 | At1g28660        | expressed protein; protein id: At1g28660.1       | 3.11      | 0.27      | 0            | 3.78         | 3.25         | 1.20         | 0.88         | 0.77           | 1.09           | 0.3                      | 0.95                    |
| A013676_01 | At4g35690        | putative protein; protein id: At4g35690.1        | 2.90      | 0.28      | 0            | 3.33         | 3.01         | 1.65         | 1.44         | 0.85           | 0.26           | 0.2                      | 1.01                    |
| A016034_01 | At5g50260        | AtCEP1; cysteine proteinase; protein id: At5g4   | 2.86      | -0.34     | 0            | 3.55         | 3.29         | 2.60         | 1.41         | 1.57           | 1.25           | 1.0                      | 0.76                    |
| A024527_01 | At1g75750        | expressed protein; protein id: At1g75750.1       | 2.68      | 0.44      | 0            | 2.74         | 2.64         | 1.90         | 0.53         | 0.26           | 0.51           | 0.1                      | 1.10                    |
| A018019_01 | At5g14740        | carbonic anhydrase 2; protein id: At5g14740.1    | 2.49      | 0.72      | 0            | 2.55         | 2.17         | 1.42         | 0.65         | 0.13           | -0.25          | 1.2                      | 0.74                    |
| A008873_01 | <b>At3g04070</b> | NAM-like protein (no apical meristem); proteir   | 2.46      | -0.85     | 0            | 3.51         | 3.19         | 2.47         | 1.85         | 1.28           | 2.48           | 0.1                      | 1.05                    |
| A014688_01 | At4g37610        | putative protein; protein id: At4g37610.1        | 2.45      | 0.12      | 0            | 2.61         | 2.59         | 2.28         | 0.90         | 0.56           | 0.68           | 0.6                      | 0.83                    |
| A012880_01 | At4g11650        | osmotin precursor; protein id: At4g11650.1       | 2.41      | -0.12     | 0            | 2.24         | 3.11         | 2.47         | 1.45         | 0.59           | 0.65           | 1.2                      | 0.72                    |
| A021133_01 | At1g11190        | bifunctional nuclease bfn1; protein id: At1g11   | 2.36      | -0.25     | 0            | 2.90         | 2.80         | 1.95         | 1.36         | 0.68           | 1.44           | 0.1                      | 1.19                    |
| A008415_01 | At2g18550        | homeodomain protein; protein id: At2g18550.      | 2.30      | -0.02     | 0            | 3.08         | 2.41         | 1.49         | 1.29         | 0.97           | 0.85           | 0.7                      | 0.81                    |
| A007656_01 | At2g44130        | expressed protein; protein id: At2g44130.1       | 2.24      | 0.21      | 0            | 2.89         | 2.21         | 1.45         | 0.60         | 1.18           | 0.45           | 0.3                      | 0.95                    |
| A014115_01 | At4g28040        | Medicago nodulin N21-like protein; protein id:   | 2.24      | -0.27     | 0            | 2.70         | 2.71         | 2.28         | 1.11         | 1.32           | 0.96           | 1.6                      | 0.68                    |
| A007362_01 | At2g33830        | auxin-regulated protein; protein id: At2g33830   | 2.24      | -0.81     | 0            | 3.11         | 2.93         | 2.82         | 2.33         | 1.88           | 1.20           | 1.2                      | 0.73                    |
| A014526_01 | At4g14930        | expressed protein; protein id: At4g14930.1       | 2.21      | 0.54      | 0            | 2.68         | 1.91         | 0.93         | 0.33         | 0.08           | 0.61           | 1.2                      | 0.73                    |
| A018673_01 | At5g01920        | putative protein; protein id: At5g01920.1        | 2.13      | 0.06      | 0            | 2.36         | 2.32         | 2.08         | 0.85         | 0.81           | 0.50           | 0.1                      | 1.60                    |
| A012430_01 | At3g59270        | putative protein; protein id: At3g59270.1        | 2.11      | -1.20     | 0            | 3.26         | 3.18         | 2.68         | 2.92         | 2.27           | 1.59           | 0.2                      | 0.99                    |
| A011193_01 | At3g22060        | receptor kinase common family, putative; prot    | 2.11      | -0.19     | 0            | 2.22         | 2.65         | 2.35         | 1.66         | 0.92           | 0.38           | 0.1                      | 1.59                    |
| A019608_01 | At3g45970        | putative protein; protein id: At3g45970.1        | 2.07      | 1.13      | 0            | 1.60         | 1.65         | 0.90         | -0.19        | -0.74          | -0.56          | 0.1                      | 1.45                    |
| A024469_01 | At5g59820        | zinc finger protein Zat12; protein id: At5g5982  | 2.02      | -0.26     | 0            | 2.35         | 2.53         | 2.15         | 1.22         | 0.93           | 0.98           | 4.5                      | 0.63                    |
| A022000_01 | At5g56540        | arabinogalactan-protein (AGP14); protein id: /   | 2.02      | 0.82      | 0            | 2.33         | 1.67         | 0.22         | -0.29        | -0.24          | 0.47           | 1.0                      | 0.75                    |
| A002917_01 | At1g68620        | expressed protein; protein id: At1g68620.1       | 1.97      | -0.99     | 0            | 3.00         | 2.92         | 2.30         | 1.81         | 1.79           | 2.12           | 0.2                      | 1.02                    |
| A020777_01 | At2g44500        | similar to axi 1 protein from Nicotiana tabacun  | 1.91      | -0.19     | 0            | 2.27         | 2.33         | 2.02         | 0.76         | 0.92           | 1.08           | 0.1                      | 1.39                    |
| A021882_01 | At5g14180        | putative protein; protein id: At5g14180.1        | 1.89      | 0.10      | 0            | 2.17         | 2.12         | 1.42         | 0.72         | 0.31           | 0.88           | 1.6                      | 0.70                    |
| A011810_01 | At3g04720        | hevein-like protein precursor (PR-4); protein ic | 1.88      | -0.58     | 0            | 2.52         | 2.65         | 2.15         | 1.86         | 1.73           | 0.78           | 0.1                      | 1.18                    |
| A004618_01 | At1g11260        | glucose transporter; protein id: At1g11260.1     | 1.86      | -0.57     | 0            | 2.55         | 2.44         | 2.22         | 1.62         | 1.31           | 1.26           | 1.0                      | 0.75                    |
| A002045_01 | At1g74670        | GAST1-like protein; protein id: At1g74670.1      | 1.84      | -0.22     | 0            | 1.67         | 2.52         | 2.52         | 1.62         | 0.72           | 0.26           | 0.2                      | 1.00                    |
| A008712_01 | At2g31945        | expressed protein; protein id: At2g31945.1       | 1.84      | -1.13     | 0            | 3.19         | 2.87         | 1.82         | 1.61         | 1.88           | 2.74           | 1.2                      | 0.72                    |
| A001631_01 | At1g35910        | trehalose-phosphatase, putative; protein id: A   | 1.84      | 0.95      | 0            | 2.01         | 1.45         | 0.09         | -0.16        | -0.06          | -0.31          | 2.2                      | 0.67                    |
| A000319_01 | At1g26820        | ribonuclease, RNS3; protein id: At1g26820.1      | 1.82      | 0.35      | 0            | 2.11         | 1.72         | 1.09         | 0.72         | -0.14          | 0.60           | 0.2                      | 0.99                    |
| A018934_01 | At5g58410        | unknown protein; protein id: At5g58410.1         | 1.80      | 0.16      | 0            | 1.95         | 1.93         | 1.74         | 0.66         | 0.49           | 0.43           | 0.1                      | 1.76                    |
| A001155_01 | At1g69490        | expressed protein; protein id: At1g69490.1       | 1.80      | -0.45     | 0            | 2.92         | 2.16         | 1.19         | 1.27         | 0.78           | 2.02           | 1.6                      | 0.70                    |

|            |                   |                                                                                                  |       |       |   |       |       |       |       |       |           |     |      |
|------------|-------------------|--------------------------------------------------------------------------------------------------|-------|-------|---|-------|-------|-------|-------|-------|-----------|-----|------|
| A009107_01 | At3g57520         | glycosyl hydrolase family 36; protein id: At3g5                                                  | 1.78  | 0.84  | 0 | 1.62  | 1.39  | 1.13  | -0.39 | -0.23 | -0.13     | 0.8 | 0.77 |
| A005246_01 | At1g02660         | expressed protein; protein id: At1g02660.1                                                       | 1.77  | -0.16 | 0 | 2.17  | 2.21  | 1.57  | 0.89  | 0.63  | 1.14      | 0.1 | 1.60 |
| A021937_01 | At1g14870         | unknown protein; protein id: At1g14870.1                                                         | 1.77  | 0.44  | 0 | 1.74  | 1.83  | 1.08  | 0.57  | -0.18 | 0.27      | 0.1 | 1.07 |
| A020847_01 | At1g10070         | tat-binding protein, putative; protein id: At1g10070.1                                           | 1.73  | -1.25 | 0 | 3.25  | 2.72  | 2.08  | 2.57  | 2.57  | 1.80      | 0.1 | 1.23 |
| A005366_01 | At5g20250         | glycosyl hydrolase family 36; protein id: At5g20250.1                                            | 1.69  | -0.98 | 0 | 2.35  | 2.71  | 2.61  | 1.83  | 1.55  | 1.80      | 4.5 | 0.63 |
| A008578_01 | At2g38400         | putative beta-alanine-pyruvate aminotransferase; protein id: At2g38400.1                         | 1.68  | 0.70  | 0 | 1.90  | 1.29  | 0.71  | 0.29  | -0.10 | -0.13     | 1.6 | 0.68 |
| A006104_01 | At2g05520         | putative glycine-rich protein; protein id: At2g05520.1                                           | 1.65  | -0.53 | 0 | 1.96  | 2.56  | 2.25  | 1.67  | 1.92  | 0.27      | 0.5 | 0.84 |
| A002539_01 | At1g32170         | xyloglucan endotransglycosylase (XTR4), putative; protein id: At1g32170.1                        | 1.65  | -0.24 | 0 | 1.77  | 2.21  | 2.10  | 1.31  | 0.80  | 0.57      | 0.1 | 2.27 |
| A019587_01 | At4g09030         | arabinogalactan-protein (AGP10); protein id: At4g09030.1                                         | 1.61  | 0.83  | 0 | 1.24  | 1.43  | 0.82  | -0.34 | -0.61 | -0.05     | 0.1 | 1.05 |
| A022381_01 | At4g27260         | GH3 like protein; protein id: At4g27260.1                                                        | 1.59  | -0.10 | 0 | 2.11  | 1.91  | 1.26  | 0.96  | 0.64  | 0.91      | 0.1 | 1.19 |
| A016319_01 | At5g44610         | expressed protein                                                                                | 1.57  | -0.28 | 0 | 2.41  | 1.95  | 1.10  | 0.75  | 0.90  | 1.54      | 0.1 | 1.19 |
| A003736_01 | At1g68230         | unknown protein; protein id: At1g68230.1                                                         | 1.57  | 0.64  | 0 | 1.38  | 1.50  | 0.79  | 0.52  | -0.46 | -0.18     | 0.1 | 1.16 |
| A018251_01 | At5g14360         | putative protein; protein id: At5g14360.1                                                        | 1.56  | 0.49  | 0 | 1.79  | 1.32  | 0.85  | -0.19 | -0.33 | <invalid> | 0.2 | 1.01 |
| A012159_01 | At3g09950         | hypothetical protein; protein id: At3g09950.1                                                    | 1.54  | 1.07  | 0 | 1.20  | 0.90  | 0.79  | 0.35  | -1.09 | -0.81     | 0.5 | 0.84 |
| A019611_01 | At5g02230         | putative protein; protein id: At5g02230.1                                                        | 1.52  | 0.40  | 0 | 1.88  | 1.29  | 0.90  | 0.23  | -0.21 | 0.72      | 0.3 | 0.92 |
| A012369_01 | At3g44240         | CCR4-associated factor 1-like protein; protein id: At3g44240.1                                   | 1.52  | -0.08 | 0 | 2.63  | 1.51  | 0.78  | 1.49  | 0.98  | 0.61      | 0.8 | 0.79 |
| A007795_01 | At2g47270         | expressed protein; protein id: At2g47270.1                                                       | 1.51  | 0.13  | 0 | 1.76  | 1.66  | 1.35  | 0.38  | 0.40  | 0.68      | 0.8 | 0.77 |
| A026002_01 | At5g07440         | glutamate dehydrogenase 2; protein id: At5g07440.1                                               | 1.50  | 0.53  | 0 | 1.63  | 1.34  | 0.84  | 0.31  | 0.01  | 0.01      | 0.8 | 0.79 |
| A025847_01 | At5g07440         | glutamate dehydrogenase 2; protein id: At5g07440.1                                               | 1.50  | 0.47  | 0 | 1.58  | 1.44  | 0.90  | 0.35  | -0.03 | 0.13      | 1.2 | 0.73 |
| A016924_01 | At5g42200         | putative protein; protein id: At5g42200.1                                                        | 1.48  | -0.04 | 0 | 1.67  | 1.84  | 1.56  | 0.89  | 0.54  | 0.56      | 1.6 | 0.70 |
| A013034_01 | At4g10910         | expressed protein; protein id: At4g10910.1                                                       | 1.47  | 0.13  | 0 | 2.43  | 1.32  | 0.60  | 1.25  | 0.76  | 0.31      | 0.1 | 1.13 |
| A012812_01 | At3g47950         | H+-transporting ATPase - like protein; protein id: At3g47950.1                                   | 1.47  | -0.81 | 0 | 2.80  | 2.16  | 1.34  | 0.79  | 1.72  | 2.41      | 4.5 | 0.62 |
| A009890_01 | At3g30775         | hypothetical protein; protein id: At3g30775.1                                                    | 1.47  | 0.90  | 0 | 1.32  | 1.09  | 0.51  | -0.31 | -0.55 | -0.21     | 0.2 | 0.97 |
| A006935_01 | At2g26170         | thromboxane-A synthase(cytochrome p450 family 17C subfamily 1 member 1); protein id: At2g26170.1 | 1.47  | 0.71  | 0 | 1.27  | 1.28  | 0.85  | -0.29 | -0.44 | 0.10      | 0.4 | 0.89 |
| A021628_01 | At2g32190         | expressed protein; protein id: At2g32190.1                                                       | 1.47  | -0.63 | 0 | 1.93  | 2.35  | 1.81  | 1.05  | 0.82  | 1.90      | 0.1 | 1.23 |
| A025798_01 | At1g12780         | uridine diphosphate glucose epimerase; protein id: At1g12780.1                                   | 1.46  | -0.81 | 0 | 2.43  | 2.12  | 2.07  | 1.93  | 1.58  | 1.37      | 0.2 | 0.97 |
| A016359_01 | At5g09440         | putative protein; protein id: At5g09440.1                                                        | 1.46  | -0.35 | 0 | 2.02  | 1.95  | 1.64  | 1.31  | 0.99  | 0.90      | 0.7 | 0.81 |
| A013429_01 | At4g01330         | putative protein kinase; protein id: At4g01330.1                                                 | 1.45  | 0.52  | 0 | 1.51  | 1.27  | 1.00  | 0.37  | -0.08 | -0.04     | 0.5 | 0.85 |
| A013995_01 | At4g24230         | putative protein; protein id: At4g24230.1                                                        | 1.44  | 0.34  | 0 | 1.97  | 1.30  | 0.78  | 0.37  | 0.74  | 0.09      | 0.1 | 1.43 |
| A020400_01 | At3g15630         | expressed protein; protein id: At3g15630.1                                                       | 1.43  | 0.12  | 0 | 1.97  | 1.43  | 1.08  | 0.85  | 0.50  | 0.45      | 0.7 | 0.81 |
| A003567_01 | At1g64660         | methionine/cystathionine gamma lyase, putative; protein id: At1g64660.1                          | 1.42  | 1.15  | 0 | 1.47  | 0.71  | -0.06 | -0.66 | -0.68 | -0.35     | 0.1 | 1.09 |
| A016324_01 | At5g39610         | NAM / CUC2 - like protein; protein id: At5g39610.1                                               | 1.42  | -0.53 | 0 | 2.57  | 1.89  | 0.97  | 1.26  | 1.03  | 1.83      | 1.0 | 0.74 |
| A025759_01 | At2g22980         | putative serine carboxypeptidase I; protein id: At2g22980.1                                      | 1.42  | -0.85 | 0 | 2.32  | 2.15  | 2.25  | 2.00  | 1.85  | 1.10      | 1.6 | 0.68 |
| A021978_01 | At1g08630         | expressed protein; protein id: At1g08630.1                                                       | 1.40  | 1.03  | 0 | 1.76  | 0.81  | -0.45 | -0.05 | -0.24 | -0.56     | 0.1 | 1.15 |
| A003186_01 | At1g67070         | phosphomannose isomerase, putative; protein id: At1g67070.1                                      | 1.40  | -0.33 | 0 | 2.18  | 1.90  | 1.20  | 0.19  | 1.40  | 1.47      | 0.2 | 1.02 |
| A009139_01 | At3g51600         | non-specific lipid transfer protein; protein id: At3g51600.1                                     | 1.39  | 0.42  | 0 | 1.30  | 1.51  | 0.97  | 0.62  | -0.02 | -0.14     | 0.3 | 0.91 |
| A015062_01 | At4g38470         | protein kinase like protein; protein id: At4g38470.1                                             | 1.35  | 0.05  | 0 | 1.80  | 1.53  | 1.07  | 0.73  | 0.57  | 0.56      | 1.6 | 0.68 |
| A014855_01 | At4g34320         | hypothetical protein common family; protein id: At4g34320.1                                      | 1.34  | -1.25 | 0 | 2.41  | 2.57  | 1.94  | 2.15  | 1.58  | 2.37      | 0.1 | 1.09 |
| A002677_01 | At1g61890         | expressed protein; protein id: At1g61890.1                                                       | 1.32  | 1.26  | 0 | 0.74  | 0.77  | 0.40  | -0.61 | -1.01 | -0.92     | 0.1 | 1.45 |
| A004431_01 | At1g08630         | expressed protein; protein id: At1g08630.1                                                       | 1.31  | 0.80  | 0 | 1.76  | 0.86  | -0.21 | 0.10  | -0.01 | -0.31     | 0.1 | 1.28 |
| A006021_01 | not annotated EST | ethylene-responsive element binding protein; protein id: At1g08630.1                             | 1.30  | -1.00 | 0 | 2.12  | 2.29  | 2.17  | 1.62  | 1.58  | 1.86      | 4.5 | 0.63 |
| A010541_01 | At3g17070         | peroxidase, putative; protein id: At3g17070.1                                                    | -1.34 | 0.20  | 0 | -1.39 | -1.01 | -0.87 | -0.27 | -0.36 | -0.29     | 2.2 | 0.64 |
| A018803_01 | At5g65430         | 14-3-3 protein GF14 kappa (grf8); protein id: At5g65430.1                                        | -1.41 | 1.08  | 0 | -1.80 | -1.91 | -1.53 | -1.20 | -1.40 | -1.23     | 0.1 | 1.18 |
| A021829_01 | At5g10390         | histone H3 - like protein; protein id: At5g10390.1                                               | -1.42 | 1.26  | 0 | -1.96 | -1.95 | -1.78 | -1.50 | -1.52 | -1.46     | 0.1 | 1.31 |



|            |           |                                                   |       |       |   |       |       |       |       |           |       |     |      |
|------------|-----------|---------------------------------------------------|-------|-------|---|-------|-------|-------|-------|-----------|-------|-----|------|
| A025911_01 | At4g23560 | glycosyl hydrolase family 9; protein id: At4g23   | -1.42 | 0.81  | 0 | -0.90 | -2.07 | -2.20 | -2.58 | -1.38     | 1.09  | 0.6 | 0.83 |
| A019861_01 | At2g37470 | putative histone H2B; protein id: At2g37470.1     | -1.45 | 0.39  | 0 | -1.47 | -1.33 | -1.15 | -0.54 | -0.44     | -0.53 | 0.3 | 0.93 |
| A006284_01 | At2g45290 | putative transketolase precursor; protein id: A   | -1.45 | 0.83  | 0 | -1.65 | -1.85 | -1.16 | -0.31 | -0.74     | -1.71 | 2.2 | 0.64 |
| A011606_01 | At3g55120 | chalcone isomerase; protein id: At3g55120.1       | -1.46 | 0.88  | 0 | -2.09 | -1.51 | -1.42 | -1.29 | -1.38     | -0.87 | 0.1 | 1.50 |
| A003101_01 | At1g06550 | 3-hydroxyisobutyryl-coenzyme A hydrolase, p       | -1.49 | 0.72  | 0 | -1.67 | -1.81 | -1.08 | -0.30 | -0.77     | -1.45 | 2.2 | 0.67 |
| A019633_01 | At3g22850 | unknown protein; protein id: At3g22850.1          | -1.50 | 0.54  | 0 | -1.73 | -1.38 | -1.27 | -1.25 | -0.59     | -0.45 | 1.0 | 0.75 |
| A015380_01 | At4g15160 | cell wall protein like; protein id: At4g15160.1   | -1.55 | -1.19 | 0 | -0.92 | -0.21 | 0.39  | 1.15  | 1.37      | 1.01  | 0.1 | 1.69 |
| A019532_01 | At4g19690 | Fe(II) transport protein; protein id: At4g19690.  | -1.56 | 0.27  | 0 | -1.68 | -1.17 | -1.33 | -0.56 | -0.63     | -0.17 | 1.6 | 0.70 |
| A003997_01 | At1g80170 | polygalacturonase, putative; protein id: At1g80   | -1.57 | -1.09 | 0 | -0.69 | -0.38 | -0.15 | 1.28  | 1.38      | 0.86  | 0.1 | 1.25 |
| A016536_01 | At5g47060 | putative protein; protein id: At5g47060.1         | -1.57 | -0.42 | 0 | -1.09 | -1.03 | -0.36 | -0.01 | 0.28      | 0.72  | 0.1 | 1.15 |
| A016527_01 | At5g56500 | rubisco subunit binding-protein beta subunit p    | -1.59 | 0.97  | 0 | -1.83 | -2.12 | -1.49 | -1.20 | <invalid> | -1.16 | 0.1 | 1.49 |
| A019642_01 | At5g48880 | 3-keto-acyl-CoA thiolase 2 (gb AAC17877.1);       | -1.62 | 1.25  | 0 | -2.29 | -2.05 | -1.85 | -1.64 | -1.59     | -1.48 | 2.2 | 0.64 |
| A024485_01 | At1g22410 | 3-deoxy-D-arabino-heptulosonate 7-phosphat        | -1.63 | -0.30 | 0 | -1.33 | -1.14 | -0.25 | 0.66  | 0.36      | -0.32 | 2.2 | 0.67 |
| A014945_01 | At4g14680 | ATP-sulfurylase; protein id: At4g14680.1          | -1.63 | -0.79 | 0 | -0.88 | -0.79 | -0.38 | 0.38  | 0.55      | 1.31  | 1.6 | 0.69 |
| A011436_01 | At3g09190 | MZB10.23; pseudogene, lectin GB:AAD56334          | -1.63 | -0.01 | 0 | -1.04 | -1.52 | -1.03 | -0.07 | 0.17      | -0.11 | 2.2 | 0.67 |
| A012116_01 | At3g12520 | sulphate transporter, putative; protein id: At3g  | -1.66 | -0.92 | 0 | -0.68 | -0.75 | -0.50 | 0.43  | 0.85      | 1.51  | 0.1 | 1.10 |
| A008472_01 | At2g37040 | phenylalanine ammonia lyase (PAL1); protein       | -1.70 | -1.25 | 0 | -0.89 | -0.67 | 0.69  | 1.72  | 1.07      | 0.95  | 1.6 | 0.69 |
| A017452_01 | At5g09990 | expressed protein; protein id: At5g09990.1        | -1.91 | -0.18 | 0 | -1.46 | -1.52 | -1.18 | -0.17 | -0.18     | 0.43  | 1.6 | 0.69 |
| A001612_01 | At1g25530 | lysine and histidine specific transporter, putati | -1.97 | -1.27 | 0 | -0.86 | -0.72 | -0.46 | 0.70  | 1.33      | 1.70  | 0.1 | 1.59 |
| A006197_01 | At2g01610 | unknown protein; protein id: At2g01610.1          | -2.01 | -0.37 | 0 | -1.61 | -1.41 | -0.86 | -0.14 | 0.06      | 0.57  | 0.2 | 0.96 |
| A025683_01 | At1g68740 | putative receptor protein; protein id: At1g6874   | -2.24 | -0.76 | 0 | -1.49 | -1.38 | -0.97 | 0.22  | 0.48      | 1.06  | 1.0 | 0.75 |
| A001129_01 | At1g78370 | glutathione transferase, putative; protein id: A  | -2.40 | 0.24  | 0 | -2.57 | -2.13 | -1.45 | -0.91 | -0.87     | -0.26 | 0.5 | 0.84 |

**Table S8.** Enriched GO terms within the genes positively contributing to the second PC, but not to the first PC, in the PCA over the differentially expressed genes from the complete dataset

Enriched GO terms and genes included within the genes positively contributing to the second principal component (PC2 Score>1.3), but not to the first principal component ([PC1 Score]<1.3), within the differentially expressed genes in the complete dataset. Normalized Log2 (mean ratio relative to 0-1 dpa mean), Scores for contribution to the second principal component in the PCA analysis, and 3% FDR multiclass SAM Score (d) and q value are shown.

| Over-represented GO term | Level     | Number in (+PC2)-PC1               | % of annotated in (+PC2)-PC1 at the level | Number in platform | % of annotated in platform at the | (+PC2)-PC1 vs Platform | Adj p value |         |           |           |                                |                              |
|--------------------------|-----------|------------------------------------|-------------------------------------------|--------------------|-----------------------------------|------------------------|-------------|---------|-----------|-----------|--------------------------------|------------------------------|
| <b>aging (GO:000</b>     | 3         | 5                                  | 10.4%                                     | 55                 | 0.5%                              | 95.7%                  | 4. 2.4E-04  |         |           |           |                                |                              |
| Genes in the term        |           |                                    |                                           |                    |                                   |                        |             |         |           |           |                                |                              |
| Oligo ID                 | AGI       | Annotation                         | PC2 Score                                 | 0-1 DPA            | 2-3 DPA                           | 4-5 DPA                | 6-7 DPA     | 8-9 DPA | 10-11 DPA | 12-14 DPA | 3%FDR multiclass SAM Score (d) | 3%FDR multiclass SAM q value |
| A000319_01               | At1g26820 | ribonuclease, RNS3                 | 1.82                                      | 0                  | 2.11                              | 1.72                   | 1.09        | 0.72    | -0.14     | 0.60      | 0.2                            | 9.9E-01                      |
| A003186_01               | At1g67070 | phosphomannose isomerase, putative | 1.40                                      | 0                  | 2.18                              | 1.90                   | 1.20        | 0.19    | 1.40      | 1.47      | 0.2                            | 1.0E+00                      |
| A001155_01               | At1g69490 | expressed protein                  | 1.80                                      | 0                  | 2.92                              | 2.16                   | 1.19        | 1.27    | 0.78      | 2.02      | 1.6                            | 7.0E-01                      |
| A008562_01               | At2g02990 | ribonuclease, RNS1                 | 3.26                                      | 0                  | 3.56                              | 3.18                   | 1.69        | 0.87    | 0.06      | 0.97      | 0.3                            | 9.5E-01                      |
| A005366_01               | At5g20250 | glycosyl hydrolase family 36       | 1.69                                      | 0                  | 2.35                              | 2.71                   | 2.61        | 1.83    | 1.55      | 1.80      | 4.5                            | 6.3E-01                      |

**Table S9.** Genes discarded from lists of significant regulated due to presumably seed expression origin

The following genes were removed from the corresponding list of significant regulated during unfertilized pistil post-anthesis development. Genes found significant expressed in at least four of the time points included in the seed development microarray analysis experiment from AtGenExpress-SeedsSiliques (<http://www.genomforschung.uni-bielefeld.de/GF-research/AtGenExpress-SeedsSiliques.html>), arrays ATGE\_76 to ATGE\_84, were considered as presumably proceeding from escaped seeds harvested among pistils and were removed. Normalized Log<sub>2</sub> (mean ratio relative to 0-1 DPA mean), 3% FDR multiclass SAM Score (d) and q value, and expression present in the time points of seed development corresponding to ATGE\_76 - ATGE\_84 microarrays are shown.

Discarded from the complete dataset

| Oligo ID   | AGI       | Annotation                                                   | 0-1 DPA | 2-3 DPA | 4-5 DPA | 6-7 DPA | 8-9 DPA | 10-11 DPA | 12-14 DPA | 3% FDR multiclass SAM Score (d) | 3% FDR multiclass SAM q value |
|------------|-----------|--------------------------------------------------------------|---------|---------|---------|---------|---------|-----------|-----------|---------------------------------|-------------------------------|
| A015892_01 | At5g58070 | outer membrane lipoprotein - like; protein id: At5g58070.1   | 0       | 0.61    | 0.92    | 1.10    | 1.10    | 1.10      | 1.38      | 1.3                             | 0.06                          |
| A005991_01 | At5g44120 | legumin-like protein; protein id: At5g44120.1                | 0       | -0.51   | 0.59    | 0.12    | 3.11    | 3.16      | 4.71      | 0.9                             | 0.48                          |
| A020404_01 | At5g44120 | legumin-like protein; protein id: At5g44120.1                | 0       | -0.44   | 0.59    | 0.66    | 3.83    | 4.00      | 5.70      | 1.0                             | 0.18                          |
| A017737_01 | At5g38160 | lipid transfer - like protein; protein id: At5g38160.1       | 0       | 0.12    | 1.45    | 2.91    | 4.81    | 3.86      | 1.55      | 0.6                             | 4.47                          |
| A005176_01 | At4g28520 | 12S cruciferin seed storage protein; protein id: At4g28520.1 | 0       | -0.22   | 0.60    | 0.18    | 3.14    | 3.31      | 5.03      | 0.8                             | 0.55                          |
| A013238_01 | At4g27160 | NWMU3 - 2S albumin 3 precursor; protein id: At4g27160.1      | 0       | -0.46   | 0.28    | 0.07    | 2.59    | 2.60      | 3.47      | 0.7                             | 0.96                          |
| A021979_01 | At4g27150 | NWMU2 - 2S albumin 2 precursor; protein id: At4g27150.1      | 0       | -0.65   | -0.03   | -0.17   | 2.66    | 2.66      | 2.99      | 0.8                             | 0.55                          |
| A012893_01 | At4g27140 | NWMU1 - 2S albumin 1 precursor; protein id: At4g27140.1      | 0       | -0.73   | 0.09    | -0.29   | 2.59    | 2.76      | 3.50      | 0.9                             | 0.31                          |
| A021227_01 | At3g58200 | putative protein; protein id: At3g58200.1                    | 0       | -1.19   | -1.95   | -1.83   | -1.39   | -0.42     | -1.71     | 0.9                             | 0.27                          |
| A009011_01 | At3g22640 | expressed protein; protein id: At3g22640.1                   | 0       | 2.64    | 2.04    | 0.65    | 0.86    | 0.85      | 1.32      | 0.8                             | 0.81                          |
| A012839_01 | At3g08860 | putative aminotransferase; protein id: At3g08860.1           | 0       | 1.72    | 2.07    | 1.59    | 2.09    | 2.59      | 4.20      | 0.7                             | 1.61                          |
| A023277_01 | At1g47540 | trypsin inhibitor 2, putative; protein id: At1g47540.1       | 0       | 1.51    | 1.94    | 2.26    | 2.99    | 3.11      | 3.22      | 2.3                             | 0.06                          |

Discarded from the dataset reduced to 0-1, 2-3 and 10-14 DPA

| Oligo ID   | AGI       | Annotation                                                   | 0-1 DPA | 2-3 DPA | 10-14 DPA | 3% FDR multiclass SAM Score (d) | 3% FDR multiclass SAM q value | Seed (2-2.75 DPA) | Seed (2.75-3.5 DPA) | Seed (3.5-3.75 DPA) | Seed (4.5-5 DPA) |
|------------|-----------|--------------------------------------------------------------|---------|---------|-----------|---------------------------------|-------------------------------|-------------------|---------------------|---------------------|------------------|
| A020404_01 | At5g44120 | legumin-like protein; protein id: At5g44120.1                | 0       | -0.44   | 4.85      | 2.5                             | 0.05                          |                   | expressed           | expressed           | expressed        |
| A005991_01 | At5g44120 | legumin-like protein; protein id: At5g44120.1                | 0       | -0.51   | 3.94      | 2.2                             | 0.05                          |                   | expressed           | expressed           | expressed        |
| A016906_01 | At5g40420 | oleosin; protein id: At5g40420.1                             | 0       | -0.64   | 1.78      | 1.6                             | 0.41                          |                   | expressed           | expressed           | expressed        |
| A005176_01 | At4g28520 | 12S cruciferin seed storage protein; protein id: At4g28520.1 | 0       | -0.22   | 4.17      | 2.1                             | 0.05                          |                   | expressed           | expressed           | expressed        |
| A020770_01 | At4g28520 | compared to genome                                           | 0       | -1.53   | 3.45      | 1.2                             | 2.11                          |                   | expressed           | expressed           | expressed        |
| A013238_01 | At4g27160 | NWMU3 - 2S albumin 3 precursor; protein id: At4g27160.1      | 0       | -0.46   | 3.03      | 1.9                             | 0.08                          |                   | expressed           | expressed           | expressed        |
| A021979_01 | At4g27150 | NWMU2 - 2S albumin 2 precursor; protein id: At4g27150.1      | 0       | -0.65   | 2.82      | 2.2                             | 0.05                          |                   |                     | expressed           | expressed        |
| A012893_01 | At4g27140 | NWMU1 - 2S albumin 1 precursor; protein id: At4g27140.1      | 0       | -0.73   | 3.13      | 2.4                             | 0.05                          |                   |                     | expressed           | expressed        |
| A009011_01 | At3g22640 | expressed protein; protein id: At3g22640.1                   | 0       | 2.64    | 1.09      | 1.7                             | 0.27                          |                   |                     | expressed           | expressed        |
| A012839_01 | At3g08860 | putative aminotransferase; protein id: At3g08860.1           | 0       | 1.72    | 3.40      | 1.3                             | 1.42                          |                   |                     |                     |                  |
| A023277_01 | At1g47540 | trypsin inhibitor 2, putative; protein id: At1g47540.1       | 0       | 1.51    | 3.16      | 5.1                             | 0.05                          |                   | expressed           | expressed           | expressed        |
| A025900_01 | At1g71890 | putative sucrose transport protein; protein id: At1g71890.1  | 0       | -0.31   | -1.40     | 2.0                             | 0.08                          |                   | expressed           | expressed           | expressed        |

---



---

| Oligo ID   | AGI       | Seed (2-2.75 DPA) | Seed (2.75-3.5 DPA) | Seed (3.5-3.75 DPA) | Seed (4.5-5 DPA) | Seed (3.75-4 DPA) | Seed (4-4.5 DPA) | Seed (5-6 DPA) | Seed (6-8 DPA) |
|------------|-----------|-------------------|---------------------|---------------------|------------------|-------------------|------------------|----------------|----------------|
| A015892_01 | At5g58070 |                   |                     |                     | expressed        |                   | expressed        | expressed      | expressed      |
| A005991_01 | At5g44120 |                   | expressed           | expressed           | expressed        | expressed         | expressed        | expressed      | expressed      |
| A020404_01 | At5g44120 |                   | expressed           | expressed           | expressed        | expressed         | expressed        | expressed      | expressed      |
| A017737_01 | At5g38160 |                   | expressed           | expressed           | expressed        | expressed         | expressed        | expressed      | expressed      |
| A005176_01 | At4g28520 |                   | expressed           | expressed           | expressed        | expressed         | expressed        | expressed      | expressed      |
| A013238_01 | At4g27160 |                   | expressed           | expressed           | expressed        | expressed         | expressed        | expressed      | expressed      |
| A021979_01 | At4g27150 |                   |                     | expressed           | expressed        | expressed         | expressed        | expressed      | expressed      |
| A012893_01 | At4g27140 |                   |                     | expressed           | expressed        | expressed         | expressed        | expressed      | expressed      |
| A021227_01 | At3g58200 |                   |                     |                     | expressed        | expressed         | expressed        | expressed      | expressed      |
| A009011_01 | At3g22640 |                   |                     | expressed           | expressed        | expressed         | expressed        | expressed      | expressed      |
| A012839_01 | At3g08860 |                   |                     |                     | expressed        |                   | expressed        | expressed      | expressed      |
| A023277_01 | At1g47540 |                   | expressed           | expressed           | expressed        | expressed         | expressed        | expressed      | expressed      |

| Oligo ID   | AGI       | Seed (3.75-4 DPA) | Seed (4-4.5 DPA) | Seed (5-6 DPA) | Seed (6-8 DPA) |
|------------|-----------|-------------------|------------------|----------------|----------------|
| A020404_01 | At5g44120 | expressed         | expressed        | expressed      | expressed      |
| A005991_01 | At5g44120 | expressed         | expressed        | expressed      | expressed      |
| A016906_01 | At5g40420 | expressed         | expressed        | expressed      | expressed      |
| A005176_01 | At4g28520 | expressed         | expressed        | expressed      | expressed      |
| A020770_01 | At4g28520 | expressed         | expressed        | expressed      | expressed      |
| A013238_01 | At4g27160 | expressed         | expressed        | expressed      | expressed      |
| A021979_01 | At4g27150 | expressed         | expressed        | expressed      | expressed      |
| A012893_01 | At4g27140 | expressed         | expressed        | expressed      | expressed      |
| A009011_01 | At3g22640 | expressed         | expressed        | expressed      | expressed      |
| A012839_01 | At3g08860 | expressed         | expressed        | expressed      | expressed      |
| A023277_01 | At1g47540 | expressed         | expressed        | expressed      | expressed      |
| A025900_01 | At1g71890 | expressed         |                  |                |                |
